# Supplementary material for: Expression profiles of microRNAs in skeletal muscle of sheep by deep sequencing
Source: PubMed Central journal article supplement (PMC6498074; doi:10.5713/ajas.18.0473), 2018-11-27
Supplement: ajas-18-0473-suppl.pdf [file ajas-18-0473-suppl.pdf]

1 **Asian-Australasian Journal of Animal Science**

2

3 **Supplemental Information**

4

5 **Expression profile of microRNAs in skeletal muscle of sheep by deep sequencing**

6 *Zhijin Liu*<sup>1</sup>, *Cunyuan Li*<sup>1</sup>, *Xiaoyue Li*<sup>1</sup>, *Yang Yao*<sup>1</sup>, *Wei Ni*<sup>1,\*</sup>, *Xiangyu Zhang*<sup>1</sup>, *Yang Cao*<sup>1</sup>, *Wureli Hazi*<sup>2</sup>, *Dawei*

7 *Wang*<sup>1</sup>, *Renzhe Quan*<sup>1</sup>, *Shuting Yu*<sup>1</sup>, *Yuyu Wu*<sup>1</sup>, *Songmin Niu*<sup>1</sup>, *Yulong Cui*<sup>1</sup>, *Yaseen Khan*<sup>1</sup>, and *Shengwei Hu*<sup>1,\*</sup>

8

9

10

11 **\*Corresponding Author: Shengwei Hu**

12 Tel: 0993-2058002, Fax: 0993-2058002, Email: [hushengwei@163.com](mailto:hushengwei@163.com)

13 **Wei Ni**

14 Tel: 0993-2058002, Fax: 0993-2058002, Email: [niweiwonderful@sina.com](mailto:niweiwonderful@sina.com)

15 <sup>1</sup>College of Life Sciences, Shihezi University, Shihezi, Xinjiang, 832003, China

16 <sup>2</sup>College of Animal Science and Technology, Shihezi University, Shihezi, Xinjiang, 832003, China

17

18

19

21 **Table S1. Primer sequences for reverse transcription PCR and qRT-PCR**

|             | primer sequences                                 | T <sub>m</sub> value | Product size |
|-------------|--------------------------------------------------|----------------------|--------------|
| miR-199a RT | CTCAACTGGTGTCTGGAGTCGGCAATTCAGTTGAGAACA          | 37°C                 | 40bp         |
| miR-181a RT | GTCGTATCCAGTGCAGGGTCCGAGGTATTCGCACTGGATACGACACTC | 37°C                 | 48bp         |
| miR-127 RT  | GTCGTATCCAGTGCAGGGTCCGAGGTATTCGCACTGGATACGACAGCC | 37°C                 | 48bp         |
| miR-1 RT    | CTCAACTGGTGTCTGGAGTCGGCAATTCAGTTGAGTACA          | 37°C                 | 40bp         |
| miR-133a RT | CTCAACTGGTGTCTGGAGTCGGCAATTCAGTTGAGCAGCTG        | 37°C                 | 42bp         |
| miR-199a-F  | CCCAGTGTTTCAGACTACC                              | 59°C                 | 58bp         |
| miR-199a-R  | TGGTGTCGTGGAGTCG                                 |                      |              |
| miR-181a-F  | AACATTCAACGCTGTCGGT                              | 59°C                 | 67bp         |
| miR-181a-R  | CAGTGCAGGGTCCGAGGTAT                             |                      |              |
| miR-127-F   | TCGGATCCGTCTGAGCTT                               | 59°C                 | 66bp         |
| miR-127-R   | CAGTGCAGGGTCCGAGGTAT                             |                      |              |
| miR-1-F     | TGGAATGTAAAGAAGTA                                | 46°C                 | 57bp         |
| miR-1-R     | TGGTGTCGTGGAGTCG                                 |                      |              |
| miR-133a-F  | TTTGGTCCCCTTCAAC                                 | 53°C                 | 58bp         |
| miR-133a-R  | TGGTGTCGTGGAGTCG                                 |                      |              |
| β-actin-F   | CCAACCGTGAGAAGATGACC                             | 59°C                 | 97bp         |
| β-actin-R   | CCAGAGGCGTACAGGGACAG                             |                      |              |

|         |                        |      |       |
|---------|------------------------|------|-------|
| MYEF2-F | TGTCCCTCATGAAGACTACCG  | 58°C | 115bp |
| MYEF2-R | CTGGCTGGCACTAATAGGTTG  |      |       |
| IGF2-F  | TGGCATCGTGGAAGAGTGT    | 58°C | 134bp |
| IGF2-R  | GGTATGCTGTGAAGTCGTCC   |      |       |
| MBNL1-F | CGGACAGACAGACTTGAGGTAT | 58°C | 170bp |
| MBNL1-R | CACTTTTCCCGAGAGCATC    |      |       |
| CASQ1-F | GATTGAGGGTGAACGAGAGC   | 58°C | 138bp |
| CASQ1-R | GGGATGTAGGGGTGGAACT    |      |       |
| CA4-F   | TGACATCCCCAGACCCAATA   | 58°C | 107bp |
| CA4-R   | AGCCCAGGTAGCGGAAGTA    |      |       |

22

23 **Table S2. The expression level of novel mi RNAs**

| mi RNA    | LDE  | LDA | mi RNA    | LDE | LDA |
|-----------|------|-----|-----------|-----|-----|
| novel_1   | 1452 | 362 | novel_23  | 6   | 2   |
| novel_4   | 248  | 3   | novel_63  | 6   | 2   |
| novel_39  | 99   | 28  | novel_83  | 5   | 3   |
| novel_74  | 81   | 28  | novel_27  | 4   | 2   |
| novel_103 | 80   | 5   | novel_68  | 4   | 0   |
| novel_42  | 59   | 9   | novel_124 | 3   | 0   |

|           |    |    |           |   |    |
|-----------|----|----|-----------|---|----|
| novel_116 | 53 | 10 | novel_32  | 3 | 0  |
| novel_9   | 29 | 16 | novel_73  | 3 | 10 |
| novel_79  | 27 | 22 | novel_87  | 3 | 1  |
| novel_82  | 18 | 1  | novel_91  | 3 | 0  |
| novel_48  | 15 | 0  | novel_111 | 2 | 7  |
| novel_69  | 14 | 2  | novel_120 | 2 | 0  |
| novel_44  | 9  | 8  | novel_121 | 2 | 0  |
| novel_96  | 9  | 5  | novel_60  | 2 | 0  |
| novel_101 | 8  | 3  | novel_127 | 1 | 0  |
| novel_25  | 8  | 4  | novel_133 | 1 | 0  |
| novel_78  | 8  | 9  | novel_51  | 1 | 0  |
| novel_17  | 7  | 5  | novel_94  | 1 | 7  |
| novel_115 | 6  | 0  | novel_99  | 1 | 0  |
| novel_19  | 6  | 1  | novel_107 | 0 | 1  |

24

25 **Table S3. KEGG pathways enriched for target gene functions of mi RNAs related to skeletal muscle in sheep**

| KEGG ID  | Term                  | Gene<br>number | Gene symbol                              |
|----------|-----------------------|----------------|------------------------------------------|
| oas04310 | Wnt signaling pathway | 28             | PRKCG, DKK1, PLCB4, RUVBL1, LRP6, DAAM1, |

---

|          |                         |    |                                                                                                                                                                                                                                                                                                                                                                                                                                                                                                                                                                                                                                                                                                                           |
|----------|-------------------------|----|---------------------------------------------------------------------------------------------------------------------------------------------------------------------------------------------------------------------------------------------------------------------------------------------------------------------------------------------------------------------------------------------------------------------------------------------------------------------------------------------------------------------------------------------------------------------------------------------------------------------------------------------------------------------------------------------------------------------------|
|          |                         |    | CUL1, TBL1X, TBL1XR1, FZD3, CAMK2G,<br>CSNK1A1, GSK3B, ROCK2, CTNNB1, WNT5A,<br>PRKACA, NFATC3, PPP3CA, AXIN1, APC, DVL2,<br>FBXW11, FZD4, SENP2, CAMK2A,<br>LOC101102299<br>PRKCG, TRAF6, GADD45B, IL1B, RPS6KA1,<br>MAP2K2, MAPK8IP3, FGF7, LOC101103463,<br>MAP3K2, ELK4, ARRB1, MAP4K4, MAP3K5, NF1,<br>STK4, FGF19, TAB1, FAS, RASGRP1, ECSIT,<br>PLA2G4D, CASP3, PDGFRA, CRK, DUSP10,<br>MEF2C, MECOM, NFATC3, LOC101114987, PAK2,<br>HSPA8, MAPKAPK5, PRKACA, RASGRP2,<br>PPP3CA, RASGRF1, MAPK3<br>LLGL2, CSNK1D, LLGL1, AFP, PARD3, YWHAB,<br>BMP4, PPP1CA, SMAD2, PATJ, FZD3, FZD4, ID2,<br>GSK3B, CTNNB1, WNT5A, APC, DVL2, ACTG1,<br>FBXW11, TP73, YAP1, RASSF1, BMPR1B, AXIN1,<br>WWTR1, CDKL3, LOC101102299 |
| oas04010 | MAPK signaling pathway  | 38 |                                                                                                                                                                                                                                                                                                                                                                                                                                                                                                                                                                                                                                                                                                                           |
| oas04390 | Hippo signaling pathway | 28 |                                                                                                                                                                                                                                                                                                                                                                                                                                                                                                                                                                                                                                                                                                                           |
| oas04540 | Gap junction            | 27 | TUBA8, PRKCG, CSNK1D, PLCB4, MAPK3,                                                                                                                                                                                                                                                                                                                                                                                                                                                                                                                                                                                                                                                                                       |

---

---

|          |                                      |    |                                                                                                                                                                                                                                                                                                 |
|----------|--------------------------------------|----|-------------------------------------------------------------------------------------------------------------------------------------------------------------------------------------------------------------------------------------------------------------------------------------------------|
|          |                                      |    | MAP3K2, PDGFD, PDGFRA, CDK1, TUBB,<br>LOC101115640, LOC101102968, GJD2, TUBAL3,<br>ITPR2, MAP2K2, PRKACA, LOC101108550,<br>ADCY9, DRD2, LOC105606030, LOC105606031<br>PRKCG, ATP2A1, PLCB4, P2RX4, PTK2B,<br>ADRA1A, LOC105605952, PDGFRA, TACR3,<br>PDE1A, LOC101115640, PPP3CA, LOC101104306, |
| oas04020 | Calcium signaling pathway            | 26 | ITPR2, LOC101108550, EDNRB, CAMK2G,<br>CALM3, ADCY9, ORAI3, LOC101111432,<br>PRKACA, VDAC2, CAMK2A, LOC101106702,<br>LOC105606070<br>PRKCG, MAP2K2, PLCB4, HDAC3, HDAC1,<br>ITGAV, ATP1B1, NCOA3, PIK3R1, SLC9A1, TSC2,                                                                         |
| oas04919 | Thyroid hormone signaling<br>pathway | 24 | GATA4, ATP1B3, GSK3B, ATP1A1, STAT4,<br>CTNNB1, MED16, PRKACA, RXRB, MAPK3,<br>ACTG1, KAT2A, MED13L<br>MAPK3, MAP3K2, LOC105606031, CAMK2,                                                                                                                                                      |
| oas04912 | GnRH signaling pathway               | 17 | CAMK2G, LOC101115640, MMP14, HBEGF,<br>PLD2, MAP2K2, PLA2G4D, ITPR2, PLCB4,                                                                                                                                                                                                                     |

---

---

|          |                                                        |    |                                            |
|----------|--------------------------------------------------------|----|--------------------------------------------|
|          |                                                        |    | ADCY9, LOC105606030, PTK2B, PRKACA         |
|          |                                                        |    | BMP4, FBXW11, WNT5A, PRKACA, LRP2,         |
| oas04340 | Hedgehog signaling pathway                             | 10 | CSNK1A1, CSNK1D, CSNK1G3, GSK3B            |
|          |                                                        |    | LOC101102299                               |
|          |                                                        |    | MAPK3, CDKL3, BMP4, IFNG, CHRDL, DCN, ID2, |
| oas04350 | TGF-beta signaling pathway                             | 14 | CUL1, ID3, SMAD9, PITX2, BMPR1B, SMAD2,    |
|          |                                                        |    | ZFYVE9                                     |
|          |                                                        |    | MAPK3, PRKCG, PAK2, PIK3R1, CRK, MAP2K2,   |
| oas04012 | ErbB signaling pathway                                 | 10 | HBEGF, CAMK2G, CAMK2A, GSK3B               |
|          |                                                        |    | PRKAR1A, LOC101103784, BPHL, CAPN2,        |
|          |                                                        |    | PPP3CA, IRAK3, CASP7, DFFA, NFKBIA, FAS,   |
| oas04210 | Apoptosis                                              | 19 | CAPN1, PIK3R1, CASP3, PRKACA, IL1B         |
|          |                                                        |    | LOC101103463, CASP6, CASP8, LOC101103049   |
| oas00400 | Phenylalanine, tyrosine and<br>tryptophan biosynthesis | 3  | LOC101103614, TAT, GOT2                    |

---

| Target gene | geneID             | Description | sRNA                                                                                                                                                                                                                                                                                                                                                                                                                                                                                                                                                                                                                                                                                                                                                                                                                                                                                                                                                                                                                                                                                                                                                                                                                                                                                                                                                                                                                                                                                                                                                               |
|-------------|--------------------|-------------|--------------------------------------------------------------------------------------------------------------------------------------------------------------------------------------------------------------------------------------------------------------------------------------------------------------------------------------------------------------------------------------------------------------------------------------------------------------------------------------------------------------------------------------------------------------------------------------------------------------------------------------------------------------------------------------------------------------------------------------------------------------------------------------------------------------------------------------------------------------------------------------------------------------------------------------------------------------------------------------------------------------------------------------------------------------------------------------------------------------------------------------------------------------------------------------------------------------------------------------------------------------------------------------------------------------------------------------------------------------------------------------------------------------------------------------------------------------------------------------------------------------------------------------------------------------------|
| FIBBP       | ENSOARGO(fibrobl)  |             | miR-3184-5p, miR-539-3p, miR-423-5p, miR-2478, miR-432-3p, miR-6525, miR-329a-5p, miR-1343-5p, novel_96, miR-543-5p, miR-491-5p, miR-324-3p, miR-3141, miR-301a-5p, miR-339a, novel_121, miR-487a-3p, miR-95-3p, miR-339-5p, novel_79, miR-485-3p, miR-26b-3p, miR-329-5p, miR-16-1-3p, miR-3963, miR-16-1-3p, miR-339b, miR-1343-5p, miR-2408, miR-3141, miR-301b-5p                                                                                                                                                                                                                                                                                                                                                                                                                                                                                                                                                                                                                                                                                                                                                                                                                                                                                                                                                                                                                                                                                                                                                                                              |
|             |                    |             | miR-454-3p, miR-874-5p, miR-17-3p, miR-664a, miR-155-5p, miR-324-3p, miR-664a-5p, miR-3604, miR-665, miR-122-5p, miR-6134, miR-10b-5p, miR-425-5p, miR-27b-5p, novel_32, miR-22-3p, miR-155-5p, miR-301a-3p, miR-10a, miR-216b-3p, miR-30c-1-3p, miR-30b-3p, miR-299-3p, miR-324-3p, miR-196a-3p, novel_17, miR-486-3p, miR-143-3p, miR-664b-3p, miR-181b-1-3p, miR-377-5p, miR-140-3p, miR-5703, novel_133, miR-2300b-3p, miR-193b-5p, miR-532-3p, novel_83, miR-383-5p, miR-7859, miR-23b-3p, miR-23c, miR-148b-3p, miR-340-5p, miR-548e-3p, miR-4726-5p, miR-382-3p, miR-1285-5p, miR-361-3p, novel_111, miR-668-5p, miR-378j, miR-25, miR-3596, miR-3064-5p, miR-10b, miR-3085-3p, miR-130b-3p, miR-1306-5p, miR-4532, miR-8485, miR-30c-1-3p, miR-23a-3p, miR-1388-3p, miR-1388-5p, miR-30b-3p, miR-296-5p, miR-10b, miR-145b, miR-181b-2-3p, novel_78, miR-486b-3p, miR-6740-5p, miR-34c-3p, miR-1260b, miR-193a-5p, miR-1248, miR-329b, miR-23b, miR-488-3p, miR-2285aa, miR-370-3p, miR-152-3p, miR-17-3p, miR-30c-2-3p, miR-1260a, miR-3064-5p, miR-4286, miR-155-5p, miR-10a-5p, miR-1290, miR-299a-3p, miR-6517, miR-22-5p, miR-6119-3p, miR-33a-3p, miR-425-5p, miR-301b-3p, miR-2428, miR-323c, miR-371b-3p, miR-24-3p, miR-17-3p, miR-1306, miR-21c, miR-2387, miR-148a-3p, miR-677, miR-181b-3p, miR-299b-3p, miR-10a-5p, novel_51, miR-455-5p, miR-7-5p, miR-296-3p, miR-296-3p, miR-455-5p, miR-30b-3p, miR-21-5p, miR-1260b, miR-197-3p, miR-22-3p, miR-145a-5p, miR-432, miR-7b-5p, miR-194-3p, miR-432-5p, miR-130a-3p, miR-377-5p, miR-26b-3p |
| PIGS        | ENSOARGO(phosphat) |             | miR-374c-5p, miR-877-3p, miR-323c, miR-539-5p, miR-3184-3p, miR-145a-3p, miR-203b-5p, miR-1468-5p, miR-147-5p, miR-130b-5p, novel_74, miR-655-3p, miR-665, miR-22-3p, miR-331-5p, miR-3082-5p, miR-21-3p, miR-221-5p, miR-10b-3p, miR-107, miR-3591-3p, miR-655, miR-376a-5p, miR-2483-5p, miR-130b-5p, miR-221-5p, miR-1277-5p, miR-107, miR-1468, miR-124-5p, miR-200c-3p, miR-2285af, miR-200c, miR-2284z, miR-216a-3p, miR-103, miR-200b, miR-429-3p, miR-103a-3p, miR-2284aa, miR-200b-3p, miR-361-5p, miR-378d, miR-493-3p, miR-33b-3p, miR-22-3p, miR-1434-5p, miR-2300b-3p, miR-1434-3p                                                                                                                                                                                                                                                                                                                                                                                                                                                                                                                                                                                                                                                                                                                                                                                                                                                                                                                                                                    |
| ARHGAP28    | ENSOARGO(Rho GTPa) |             |                                                                                                                                                                                                                                                                                                                                                                                                                                                                                                                                                                                                                                                                                                                                                                                                                                                                                                                                                                                                                                                                                                                                                                                                                                                                                                                                                                                                                                                                                                                                                                    |



miR-92b, miR-21-5p, miR-212b, miR-92b-5p, novel\_12b, miR-912-3p, miR-495-3p, miR-17-3p, miR-92a-3p, miR-147-5p, miR-203b-5p, miR-133a-5p, miR-20a-5p, miR-502-5p, miR-29a-3p, miR-670-3p, miR-146b-3p, miR-10a-5p, miR-6395, miR-6516-3p, miR-2285ab, miR-376b-3p, miR-21c, miR-654-3p, miR-345-5p, miR-130b-5p, miR-101-5p, miR-17-5p, miR-106a-5p, miR-330-3p, miR-2284d, miR-2285g, miR-544b, miR-20b, miR-187-3p, miR-377-5p, miR-29b, miR-21-5p, miR-380-3p, miR-2284ab, miR-181a-5p, miR-1434-3p, miR-145a-5p, miR-93, miR-323-3p, miR-1306-5p, miR-34c-3p, miR-29b-3p, miR-3969, miR-154b-5p, miR-199a-5p, miR-671-5p, miR-190a-3p, miR-7144-5p, miR-488-3p, miR-381-3p, miR-3154, miR-17-5p, miR-320a, miR-199a-5p, miR-3065-3p, miR-181b-5p, miR-17-3p, miR-92a-3p, miR-376b-3p, miR-217, miR-30c-2-3p, miR-483-3p, miR-1271-5p, miR-6516-5p, miR-2411-5p, miR-300, miR-10a-5p, miR-134, miR-345-3p, miR-29d-3p, miR-7134-5p, miR-212-3p, miR-181d-5p, miR-2285f, miR-2285y, miR-371a-5p, miR-489, miR-376d, miR-452-3p, miR-20a-3p, miR-7977, miR-199b-5p, miR-30c-1-3p, miR-106a-5p, miR-1839-3p, miR-494-3p, miR-326, miR-1306-5p, miR-342, miR-320b, miR-2320-3p, miR-2285e, miR-9788-3p, miR-216a-3p, miR-151a-3p, novel\_4, miR-409b, miR-101a-5p, miR-450b-5p, miR-544a, miR-2284aa, miR-10b, miR-484, miR-6529a, miR-206-3p, miR-10b-5p, miR-338-3p, miR-4510, miR-539-5p, miR-3074-2-3p, miR-425-5p, miR-1271, miR-6516-3p, miR-17-3p, miR-450b-3p, miR-320e, miR-324-3p, miR-6130, miR-6516, miR-544-3p, novel\_32, novel\_25, miR-204-3p, miR-545-3p, miR-3065-3p, miR-2312, miR-582-5p, novel\_99, miR-29b-1-5p, miR-2411, miR-20a, miR-760-3p, miR-106a, miR-320d, miR-2284m, miR-532-3p, novel\_83, miR-4429, miR-378d, miR-2300b-3p, miR-5703, miR-1193, miR-2904, miR-199b-5p, miR-2285m, miR-29c-3p, miR-1839-3p, miR-206, miR-29a, miR-6119-3p, novel\_87, miR-miR-2957, miR-200a-5p, miR-26b-3p, miR-148b-5p, miR-669, miR-BCLAF1 ENSOARGO(BCL2-ass, 148b-5p, miR-148a-5p miR-147a, let-7g-5p, miR-149-5p, miR-2300a-5p, miR-409b, miR-31-5p, miR-187-3p, miR-450b-5p, miR-1839-5p, miR-542-3p, miR-2284r, miR-22-3p, miR-432-3p, miR-8485, miR-296-3p, let-7a-5p, miR-376b, let-7e, miR-466f-3p, miR-1343-5p, miR-125a-5p, miR-296-3p, miR-320b, miR-182-5p, miR-197-5p, miR-2483-3p, miR-6535, miR-320c, let-7d-5p, novel\_68, miR-541-5p, miR-1291, miR-877-3p, miR-505-3p, miR-6395, let-7e-5p, miR-379-5p, miR-18a-3p, miR-877-3p, miR-423-5p, miR-8095, miR-3059-5p, miR-2285t, miR-218-5p, let-7i, miR-505-5p, miR-328-3p, miR-18a-3p, miR-505-3p, let-7d, miR-4429, miR-378d, miR-1961, miR-1290, miR-1197-5p, miR-1193, miR-1343-5p, miR-490-3p, let-7g, miR-2424, miR-486-3p, miR-4286, let-7f-5p, miR-466i-5p, miR-98-5p, miR-320d, miR-450a-2-3p, let-7k, miR-543-5p, novel\_127, miR-6119-5p, novel\_17, miR-125b, miR-92a-1-5p, let-7c-5p, miR-324-3p, miR-6130, let-7i-5p, miR-22-3p, miR-874-3p, miR-545-3p, miR-296-3p, miR-182-5p, miR-125a, miR-23a-5p, novel\_48, miR-320a, miR-129b-3p, miR-1197-3p, miR-6525, miR-6134, miR-3184-5p, let-7b-5p, miR-4510, miR-539-5p, let-7b, miR-486b-3p, miR-487a-5p, miR-4492, miR-2332, let-PBX2 ENSOARGO(pre-B-ce 7f, miR-2433, miR-3969, miR-125b-5p

miR-100-5p, miR-601-5p, miR-602-5p, miR-610, miR-101-5p, miR-1248, miR-7144-5p, miR-874-3p, miR-574-5p, miR-215-5p, miR-141-3p, miR-615-5p, miR-2285aa, miR-598-3p, miR-542-5p, miR-2355-5p, miR-154b-5p, miR-376c-3p, miR-324-5p, miR-199a-5p, miR-5100, miR-1-5p, miR-29b-3p, miR-1306-5p, novel\_42, miR-28a-3p, miR-1260b, miR-1197-3p, miR-500b-5p, miR-3578, miR-330-5p, miR-29d-3p, miR-1343-5p, miR-300, miR-6517, miR-2285ad, miR-431, miR-1224-5p, miR-412, miR-129-1-3p, novel\_121, miR-214-5p, miR-545-5p, miR-582-3p, miR-450a-1-3p, miR-125a-3p, miR-1260a, miR-3071-3p, miR-181b-5p, miR-1a-2-5p, miR-127-5p, miR-17-3p, miR-28-3p, miR-543-5p, novel\_96, miR-200a-3p, miR-152-3p, miR-107, miR-181a-2-3p, miR-3064-5p, miR-2478, miR-2285b, miR-490-3p, miR-199a-5p, miR-148a-3p, miR-2387, miR-1306, miR-107, miR-1291, miR-505-3p, miR-3120-3p, miR-7-1-3p, miR-670-3p, miR-411b-3p, miR-29a-3p, miR-2404, miR-576-3p, miR-6529b, miR-485-3p, novel\_1, miR-29a, miR-128-1-5p, miR-6119-3p, miR-502b, miR-656-5p, miR-1a-1-5p, miR-219b-3p, miR-135a-2-3p, miR-29c-3p, miR-17-3p, miR-3957-3p, miR-24-3p, miR-2428, miR-199b-5p, miR-326-3p, novel\_27, miR-1434-3p, miR-7b-5p, miR-1843b-5p, miR-181a-5p, miR-708-3p, miR-194-5p, miR-450c-3p, miR-1260b, miR-29b, miR-188-5p, miR-27b-3p, miR-2889, miR-7862, miR-103a-3p, miR-133b-5p, miR-31-5p, miR-340-3p, miR-377-5p, miR-665, miR-185-5p, miR-134-3p, miR-544b, miR-103, miR-194-3p, miR-377-3p, miR-7-5p, novel\_51, miR-194a, miR-330-3p, miR-190a, miR-378a-5p, miR-1343-5p, miR-6240, miR-130b-5p, miR-363-5p, miR-2483-5p, miR-432-3p, miR-654-3p, miR-432-3p, miR-2285r, miR-450a-1-3p, miR-21a-3p, miR-129b-3p, miR-598-3p, novel\_99, miR-186-5p, miR-1895, miR-543-3p, miR-2331-3p, miR-504-5p, miR-552-3p, miR-139-5p, miR-216b-5p, miR-6130, miR-544-3p, miR-132-5p, miR-376e-3p, miR-192-miR-7705, miR-211, miR-382-5p, miR-19b-1-5p, miR-2440, miR-204-5p, miR-6123, novel\_1, novel\_74, miR-211-5p, miR-452-3p, miR-548o-3p, miR-574-5p, miR-223-5p, miR-2483-3p, miR-6516, miR-18a-3p, novel\_99, miR-1814c, miR-186-5p, miR-1248, miR-493-5p, miR-19a-3p, miR-668-5p, miR-2318, miR-493-5p, miR-6240, miR-758-3p, miR-2310, miR-29a-5p, miR-1957a, miR-8485, miR-22841, miR-148b-5p, miR-330-3p, novel\_17, novel\_127, miR-196b-5p, miR-330-3p, miR-18a-3p, miR-148b-5p, miR-6516-5p, miR-3431, miR-758-3p, miR-2113, miR-196a-5p, miR-19b-2-5p, miR-148a-5p, miR-19b-3p, miR-

ZNF282 ENSOARGO(zinc fin.5p

EDNRB ENSOARGO(endothel 450b-5p

miR-370a, miR-188-5p, miR-200-1-5p, miR-101-5p, miR-188a-2-5p, miR-214-3p, miR-381-5p, miR-199b-5p, miR-1298-3p, miR-411b-5p, miR-2459, miR-541, miR-3956-3p, miR-190b-5p, novel\_111, miR-877-3p, miR-361-3p, miR-423-5p, miR-2440, novel\_82, miR-378g, miR-3596, miR-409-5p, miR-504, miR-3963, miR-377-5p, miR-376a-5p, miR-486-3p, miR-422a, miR-92a-1-5p, miR-324-3p, miR-98-5p, let-7k, miR-106a, miR-18a-3p, miR-328-3p, miR-1961, miR-378i, miR-217-5p, miR-378a-3p, miR-33b-3p, miR-493-3p, miR-34a-5p, miR-664-5p, miR-3074-5p, let-7b, miR-214, miR-769-5p, miR-122-5p, miR-3184-5p, miR-2285j, let-7f, miR-665, miR-190a-5p, miR-2331-3p, miR-504-5p, miR-30c-1-3p, miR-296-3p, miR-216b-3p, miR-216b-5p, miR-10a, let-7i-5p, miR-2285c, miR-433-3p, miR-339b, miR-186-5p, miR-885-3p, miR-582, miR-296-3p, miR-105-5p, miR-378a-5p, miR-103a-3p, miR-31-5p, miR-339-5p, miR-134-3p, miR-3431, miR-194-3p, miR-149-5p, miR-542-3p, miR-22-3p, miR-381-5p, miR-199b-5p, miR-412-5p, miR-6123, miR-3074-5p, miR-181b-3p, miR-320c, miR-677, miR-216a-3p, miR-150-5p, miR-3970, let-7e-5p, miR-378f, miR-3064-5p, miR-2285b, let-7g, novel\_39, let-7f-5p, novel\_96, novel\_127, miR-6517, miR-412, novel\_79, miR-1224-5p, miR-486-5p, miR-330-5p, miR-23b-5p, miR-1343-5p, miR-885-3p, miR-1260b, miR-125b-5p, miR-3068-3p, miR-125a, miR-1271, miR-2355-5p, miR-2285aa, miR-300-3p, miR-20b-5p, miR-106a-5p, miR-2330-5p, let-7a-5p, miR-30c-1-3p, miR-4532, miR-326, novel\_103, miR-5126, novel\_124, miR-3085-3p, let-7e, miR-105-1, miR-2300a-5p, miR-2285e, miR-9788-3p, miR-216a-3p, miR-500-5p, miR-10b, miR-378b, miR-484, miR-296-5p, miR-30b-3p, miR-412-3p, miR-7857, miR-450b-5p, miR-378c, miR-541-3p, novel\_60, miR-1296-5p, miR-2285f, miR-362-5p, miR-107-5p, miR-769-5p, miR-1973, miR-7134-3p, miR-10b, miR-452-3p, miR-3064-5p, miR-499b-5p, miR-489, miR-378e, let-7d-

GML

ENSOARGO(glycosyl

106a-5p, let-7a-5p, miR-378c, miR-412-3p, miR-143-5p, miR-378b, miR-500-5p, miR-142-3p, miR-27a-3p, miR-222-5p, miR-5010-3p, miR-2284q, miR-371a-5p, miR-30b-5p, miR-219a-2-3p, miR-8095, miR-362-5p, miR-181d-5p, miR-452-5p, miR-2285f, miR-3059-5p, miR-129b-5p, miR-27a-3p, let-7d-5p, miR-3082-5p, miR-7857-3p, miR-378e, miR-499b-5p, miR-541-5p, miR-664b, miR-34b-5p, miR-221-5p, miR-760-3p, miR-466i-5p, miR-106a, miR-216a-5p, miR-2411, miR-146a-5p, miR-125b-2-3p, miR-130a-5p, miR-20a, miR-19b-3p, miR-188-3p, miR-1197-5p, miR-2904, miR-376a-5p, miR-1246, novel\_133, miR-199a-3p, miR-532-3p, miR-222-5p, miR-3600, miR-548e-3p, miR-450b-3p, miR-29b-2-5p, miR-19b-1-5p, miR-338-3p, let-7b-5p, miR-3074-2-3p, miR-4510, miR-145a-3p, miR-378c, miR-539-5p, miR-30f, miR-21a-3p, novel\_32, miR-6130, miR-532-5p, miR-21-3p, miR-221-5p, miR-140-5p, miR-378a-3p, miR-1343-5p, miR-106a-5p, miR-17-5p, miR-190a, miR-345-5p, miR-654-3p, miR-1260b, miR-138, miR-181a-5p, miR-1434-3p, miR-20b, miR-6238, let-7g-5p, miR-665, miR-133b-5p, miR-199c, miR-656-5p, let-7i, miR-34c, miR-20a-5p, miR-502-5p, miR-449a, miR-326-3p, miR-24-3p, miR-211, novel\_101, miR-495-3p, miR-135a-2-3p, miR-19a-3p, miR-450b-3p, miR-2285ab, miR-34b, miR-378b, miR-181b-5p, let-7c-5p, miR-30c-2-3p, miR-1260a, miR-4286, miR-30a-3p, miR-29b-2-5p, let-7a-2-3p, miR-496, miR-582-3p, let-7d, miR-411-3p, miR-545-5p, miR-378h, miR-2411-5p, miR-204-5p, miR-138-5p, miR-331-3p, miR-26c, miR-5100, miR-365a-5p, miR-378c, miR-145-3p, miR-93, miR-500b-5p, miR-17-5p, miR-362-5p, miR-503-3p, miR-34c-5p, miR-598-3p, miR-214-3p, miR-146b, miR-1185-5p, miR-106b-5p, miR-199a-3p, miR-1b-5p, miR-378d, miR-744-3p, miR-23a-3p, miR-101b-3p, miR-2459, miR-1185-3p, miR-421, miR-455-3p, miR-147a, miR-548w, miR-199b-3p, miR-490-miR-378b, miR-361-3p, miR-7975, miR-6395, miR-499b-5p, miR-26b-3p, miR-7977, miR-2285ad, miR-328-3p, miR-331-3p, miR-874-5p, miR-543-5p, miR-345-3p, miR-382-3p, miR-423-5p, novel\_27, miR-3184-5p

ZNF836 ENSOARGO(zinc fin.421, miR-455-3p, miR-147a, miR-548w, miR-199b-3p, miR-490-miR-378b, miR-361-3p, miR-7975, miR-6395, miR-499b-5p, miR-26b-3p, miR-7977, miR-2285ad, miR-328-3p, miR-331-3p, miR-874-5p, miR-543-5p, miR-345-3p, miR-382-3p, miR-423-5p, novel\_27, miR-3184-5p

ACTR5 ENSOARGO(ARP5 act 5p, novel\_27, miR-3184-5p

miR-34c, miR-20a-5p, miR-6123, miR-128-1-5p, miR-92a-3p, miR-29a, miR-3957-3p, miR-29c-3p, miR-326-3p, miR-449a, miR-2285m, miR-2428, miR-211, miR-1307-3p, miR-1306, miR-21c, miR-376b-5p, miR-2387, miR-9851-3p, miR-450b-3p, miR-10a-5p, miR-363, miR-329-5p, miR-669, miR-299b-3p, miR-34b, miR-29a-3p, miR-2285v, miR-32, miR-106a-5p, miR-17-5p, miR-452-5p, miR-2285r, miR-450c-3p, miR-22-3p, novel\_23, miR-1434-3p, miR-2889, miR-29b, miR-21-5p, miR-665, novel\_116, miR-194-3p, miR-149-5p, miR-20b, miR-100-3p, miR-2433, novel\_63, miR-2284k, miR-29b-3p, miR-2332, miR-204-5p, miR-486b-3p, miR-1306-5p, miR-93, miR-93-5p, miR-376c-5p, miR-3154, miR-17-5p, miR-30e-5p, miR-424-3p, miR-376c-5p, miR-23a-5p, miR-20b-5p, miR-329b, miR-370-3p, miR-34c-5p, miR-365a-3p, miR-25-3p, miR-543-5p, miR-92a-3p, miR-376c-5p, miR-376b-5p, miR-3065-3p, miR-92b-3p, miR-29d-3p, miR-330-5p, miR-30a-5p, miR-155-5p, miR-10a-5p, miR-299a-3p, miR-450a-1-3p, miR-505-5p, miR-6516-5p, miR-2285n, miR-4726-5p, miR-2447, miR-423-5p, novel\_94, miR-504, miR-2285u, miR-211-5p, miR-25, miR-106b-5p, miR-1306-5p, miR-326, let-7c-3p, miR-33a-5p, miR-124a, miR-106a-5p, miR-10b, miR-143-5p, miR-450b-5p, miR-548w, miR-216a-3p, miR-2459, miR-129-5p, miR-4492, miR-450b-3p, miR-2330-3p, miR-3184-3p, miR-3184-5p, miR-10b-5p, miR-6525, miR-30d-5p, miR-450a-1-3p, miR-625-5p, miR-582-5p, let-7g-3p, miR-30f, miR-3065-3p, miR-32-5p, miR-504-5p, miR-2331-3p, miR-204-3p, miR-22-3p, miR-155-5p, miR-582-5p, miR-10a, miR-2284s, miR-6516, miR-185-3p, miR-208b-3p, miR-34b-5p, miR-30d, miR-299-3p, miR-106a, miR-20a, miR-2285w, miR-486-3p, miR-421-5p, miR-124-3p, miR-5703, miR-30c-5p, novel\_133, miR-2408, miR-193b-5p, miR-2300b-3p, miR-34a-5p, miR-378d, miR-184-3p, miR-548e-3p, miR-106a, novel\_83, miR-2284h-5p, miR-7859

SKI

ENSOARGOC SKI prot.

miR-31-5p, miR-1102, novel\_1, miR-301c-5p, miR-101a, miR-1-3p, miR-155-5p, miR-219b-3p, miR-324-3p, miR-665, miR-664a-5p, miR-2285j, miR-6134, miR-181c-5p, miR-769-5p, miR-6525, miR-224-5p, miR-3958-5p, miR-2330-3p, miR-214, miR-129-2-3p, miR-625-5p, miR-1827, let-7g-3p, miR-30d-5p, miR-21a-3p, miR-3613-5p, miR-204-3p, miR-155-5p, miR-376e-3p, miR-216b-5p, miR-296-3p, miR-552-3p, miR-182-5p, miR-30c-1-3p, miR-140-5p, miR-221-5p, miR-548o-3p, miR-221-5p, miR-30d, miR-299-3p, miR-21-3p, miR-760-3p, miR-92a-1-5p, miR-185-3p, miR-30b, novel\_17, miR-486-3p, miR-2411, miR-143-3p, miR-376c-3p, miR-181b-1-3p, miR-125b-2-3p, miR-130a-5p, miR-329a-5p, miR-664-5p, miR-361-5p, miR-493-3p, miR-33b-3p, miR-2904, miR-5703, miR-1197-5p, miR-188-3p, miR-30c-5p, miR-362-3p, miR-2300b-3p, miR-193b-5p, miR-532-3p, miR-487a-3p, miR-7859, miR-3600, miR-548e-3p, miR-2284q, miR-450a-5p, miR-769-5p, miR-371a-5p, miR-30b-5p, miR-2440, miR-219a-2-3p, miR-2285f, miR-452-5p, miR-181d-5p, miR-3059-5p, miR-2447, miR-335-3p, miR-376a-3p, miR-181a-3p, miR-136-5p, miR-376d, miR-1185-2-3p, miR-4443, miR-3082-5p, miR-211-5p, miR-24-1-5p, miR-4792, miR-214-3p, miR-3955-3p, miR-505, miR-362-3p, miR-2957, miR-182-5p, novel\_103, miR-1306-5p, miR-326, miR-3187-3p, miR-30c-1-3p, miR-101b-3p, miR-382-3p, miR-362-3p, miR-101a-5p, miR-125b-2-3p, miR-2284r, miR-329-3p, miR-1185-3p, miR-2459, miR-376b-3p, miR-181b-2-3p, miR-222-5p, miR-145b, miR-105-1, miR-409b, novel\_78, miR-2300a-5p, miR-330-3p, miR-592, miR-486b-3p, miR-204-5p, miR-331-5p, novel\_9, miR-144, miR-551b-3p, miR-29b-3p, miR-2332, miR-5100, miR-181c-3p, miR-1260b, miR-876-3p, miR-329a, miR-30e-5p, miR-331-5p, miR-376c-3p, miR-374c-3p, miR-3959-5p, miR-769, miR-370-3p, miR-2285aa, miR-17-3p, miR-2898, miR-127-5p, miR-181b-5p, miR-6536, miR-30c-2-3p, miR-30f, miR-181c-3p, miR-377-3p, miR-224-5p, miR-342, novel\_51, miR-103a-2-5p, miR-153-3p, miR-1343-5p, let-7f-2-3p, let-7f-2-3p, miR-758-3p, miR-484, miR-758-3p, novel\_23, miR-374b-3p, miR-2426, miR-21-5p, miR-1839-5p, miR-1343-3p, miR-31-5p, miR-134-3p, miR-153, miR-2459, miR-1185-3p, miR-216a-3p, miR-148b-5p, miR-142b, miR-2285n, miR-107-5p, miR-2285y, miR-374a-3p, miR-656-5p, miR-22-5p, miR-203b-5p, miR-135a-2-3p, miR-342-3p, miR-2447, miR-219a-5p, miR-2284w, miR-361-3p, miR-21c, miR-136-5p, miR-412-3p, miR-1983, miR-20a-3p, miR-7977, miR-3120-3p, miR-378g, miR-1185-2-3p, miR-200c, miR-217, miR-324-3p, miR-200c-3p, miR-148b-5p, novel\_133, miR-1193, miR-217-5p, miR-1343-5p, miR-148a-5p, miR-378d, miR-200b-3p, miR-429-3p, miR-2285ad, miR-200b, miR-383-5p, miR-532-3p, miR-582-3p, miR-135a-1-3p, miR-551b-3p, miR-320e, miR-100-3p, miR-374b-3p, miR-208b-5p, miR-103b, miR-374a-3p, miR-224-5p, miR-338-3p, miR-23a-5p, miR-1271, miR-3965, miR-377-3p, miR-204-3p

miR-101b, miR-110b-3p, miR-110b-5p, miR-110c, miR-120b-2-3p, miR-  
 424-5p, miR-664a, miR-6516-3p, miR-204-3p, novel\_32, miR-  
 6130, miR-323-5p, miR-216c-5p, miR-183-5p, miR-2432, miR-146a-  
 5p, miR-29b-1-5p, miR-185-3p, miR-196a-3p, miR-34b-5p, miR-21-  
 3p, miR-466i-5p, miR-760-3p, miR-1b-3p, miR-505-  
 3p, novel\_83, miR-383-5p, miR-15a-5p, miR-2904, miR-140-  
 3p, miR-1193, miR-5703, miR-2300b-3p, miR-2408, miR-378d, miR-  
 181d-5p, miR-541-3p, miR-107-5p, miR-2285t, miR-7977, let-7d-  
 5p, miR-361-3p, novel\_94, miR-877-3p, let-7a-5p, miR-424-  
 5p, miR-382-3p, miR-2330-5p, miR-4532, miR-30c-1-  
 3p, novel\_103, miR-326, miR-2285o, let-7e, miR-222-  
 5p, novel\_4, miR-216a-3p, miR-9788-3p, miR-2285e, miR-125b-2-  
 3p, miR-296-5p, miR-143-5p, miR-3120-5p, miR-365a-5p, miR-29b-  
 3p, miR-410-5p, miR-1-5p, miR-486b-3p, miR-138-5p, miR-370-  
 3p, miR-34c-5p, miR-3154, miR-488-3p, miR-671-5p, miR-485-  
 5p, let-7g-3p, miR-29b-2-5p, miR-1957a, miR-30c-2-3p, let-7c-  
 5p, miR-339a, miR-107, miR-543-5p, miR-450a-2-3p, miR-191-  
 3p, miR-181b-5p, miR-214-5p, miR-29d-3p, miR-218-2-3p, miR-  
 134, miR-128-3p, let-7d, miR-135a-2-3p, miR-449a, miR-326-  
 3p, miR-2428, miR-371b-3p, miR-24-3p, miR-16a, miR-34c, let-  
 7i, miR-15a, miR-6529b, miR-6402, miR-199c, miR-128-1-5p, miR-  
 146b-3p, miR-323a-5p, miR-29a-3p, miR-34b, miR-18a-3p, miR-  
 505-3p, miR-195a-5p, miR-6516-3p, miR-1291, miR-450b-3p, miR-  
 107, miR-130b-5p, miR-503-5p, miR-452-5p, miR-124-5p, miR-  
 133b-5p, miR-103, miR-2285g, miR-503-5p, let-7g-5p, miR-185-  
 5p, miR-873a-5p, miR-653, miR-1285, miR-181a-5p, miR-2889, miR-  
 138, miR-29b, miR-665-5p, miR-214, miR-433-5p, let-7b, miR-  
 3074-5p, miR-3184-5p, miR-122-5p, miR-181c-5p, miR-  
 6525, novel\_44, let-7f, miR-4492, miR-129-5p, miR-874-5p, miR-  
 130b-5p, miR-30c-1-3p, let-7i-5p, miR-15b-5p, miR-2285c, miR-  
 885-3p, miR-625-5p, miR-1827, miR-186-5p, miR-339b, miR-329a-  
 miR-16b, miR-365b-5p, miR-452-5p, miR-424-5p, miR-30a-3p, miR-  
 143-3p, miR-8485, miR-450b-5p, miR-16b, miR-497-5p, miR-  
 3960, miR-30d-3p, miR-2320-3p, miR-15a-5p, miR-322-  
 5p, novel\_83, miR-30e-3p, miR-15b-3p, miR-15a, miR-665, miR-  
 16a, miR-30a-3p, miR-2285t, miR-424-5p, miR-4510, miR-16-  
 5p, miR-365a-5p, miR-433-3p, miR-195a-5p, miR-452-3p, miR-  
 RASGEF1B ENSOARGO(RasGEF d 6130, miR-15b-5p

miR-7641, miR-1224-5p, miR-3600, miR-2285ad, miR-532-3p, miR-582-3p, miR-545-5p, miR-2284h-5p, novel\_121, miR-322-5p, miR-505-5p, miR-15a-5p, miR-378h, miR-378a-3p, miR-1434-5p, novel\_133, miR-378i, miR-362-3p, miR-493-3p, miR-2887, miR-4286, miR-216c-5p, miR-2285w, novel\_39, miR-200a, miR-1271-3p, miR-28b, miR-29b-1-5p, miR-148b-5p, miR-142a-3p, miR-125b-2-3p, miR-500a-5p, miR-422a, miR-125b, miR-205-5p, miR-1260a, miR-543-5p, miR-21-3p, miR-370-5p, miR-532-5p, miR-125a, miR-140-5p, miR-378a-3p, miR-874-3p, miR-15b-5p, miR-2284s, miR-129b-3p, miR-3154, miR-625-5p, miR-485-5p, miR-329a, miR-16-5p, miR-378c, miR-378c, miR-1260b, miR-125b-5p, miR-665, miR-370-5p, miR-1468-5p, miR-424-5p, miR-1843b-3p, miR-27a-3p, novel\_78, novel\_4, miR-149-5p, miR-142-3p, miR-185-5p, miR-134-3p, miR-1298-3p, miR-197-3p, miR-374b-3p, miR-125b-2-3p, miR-873a-5p, miR-484, miR-378b, miR-2284r, miR-329-3p, miR-497-5p, miR-27b-3p, miR-16b, miR-362-3p, miR-378c, miR-1260b, miR-127-3p, miR-424-5p, miR-2330-5p, miR-8485, miR-1b-5p, miR-378d, miR-2285r, miR-29b-1-5p, miR-362-3p, miR-3141, miR-16b, novel\_51, miR-125a-5p, miR-1468, miR-25-5p, miR-378b, miR-452-3p, miR-27a-3p, miR-454-5p, miR-4443, miR-378g, miR-3596, miR-378e, miR-2483-3p, miR-378b, miR-361-3p, miR-3141, miR-378f, miR-195a-5p, miR-136-5p, miR-1193, miR-24-3p, miR-16a, miR-2285y, miR-15a, miR-4324, miR-28c miR-502b, miR-382-5p, miR-502-5p, miR-4324, miR-576-3p, miR-326-3p, miR-211, miR-24-3p, miR-1839-3p, miR-1193, miR-7975, miR-146b-5p, miR-2319a, miR-379-5p, miR-1291, miR-19a-3p, miR-150-5p, miR-376b-5p, miR-670-3p, miR-3120-3p, miR-3074-5p, miR-125a-5p, miR-660, miR-466f-3p, miR-2331-5p, novel\_51, miR-7-5p, miR-146a, miR-345-5p, miR-432-3p, miR-101-5p, miR-188-5p, miR-219a-1-3p, miR-22-3p, miR-542-3p, miR-7b-5p, novel\_116, miR-3431, miR-26b-3p, miR-3432a, miR-204-5p, miR-28-5p, miR-125b-5p, miR-26c, miR-409-3p, miR-370-5p, miR-500b-5p, miR-193a-5p, miR-144-5p, miR-376c-5p, miR-23a-5p, miR-3074-1-3p, miR-190a-3p, miR-485-5p, miR-671-5p, miR-10b-3p, miR-345-5p, miR-329a, miR-362-5p, miR-376c-5p, miR-125a, miR-215-5p, miR-574-5p, miR-543-5p, miR-450a-2-3p, miR-30c-2-3p, miR-205-5p, miR-664-3p, miR-125a-3p, miR-3956-5p, miR-2478, miR-29b-2-5p, miR-330-5p, miR-1290, novel\_121, miR-2285ad, miR-2285t, miR-4726-5p, miR-301a-5p, novel\_82, miR-7705, miR-362-5p, miR-452-5p, miR-3059-5p, miR-2447, miR-335-3p, miR-378j, miR-361-3p, miR-144-5p, miR-211-5p, miR-7977, miR-664b, miR-146b, miR-3955-3p, miR-362-3p, miR-326, miR-8485, miR-193a, miR-30c-1-3p, miR-376b, miR-1839-3p, miR-362-3p, miR-296-5p, miR-329-3p, miR-301b-5p, miR-455-3p, miR-500-5p, miR-147a, miR-1298-3p, novel\_78, miR-708-5p, miR-487a-5p, miR-29b-2-5p, miR-665, miR-2285j, miR-338-3p, miR-145a-3p, miR-3074-5p, miR-1827, miR-345-5p, miR-129b-3p, miR-22-3p, miR-204-3p, miR-877-5p, miR-192-5p, miR-370-5p, miR-30c-1-3p, miR-221-5p, miR-660-5p, miR-1277-5p, miR-221-5p, miR-324-3p, miR-500a-5p, miR-125b, miR-146a-5p, miR-376a-5p, miR-345-3p, miR-361-5p, miR-378d, miR-19b-3p, miR-1197-5p, miR-1193, miR-5703, novel\_133, miR-215-5p, miR-1246, miR-362-3p, miR-212-5p

INSR ENSOARGOC insulin

KPRP ENSOARGOC keratino



miR-154b-5p, miR-488-3p, miR-301, miR-331-5p, miR-93-5p, miR-17-5p, miR-3154, miR-329a, miR-345-5p, novel\_48, miR-20b-5p, miR-671-5p, miR-6128, miR-193a-5p, miR-103b, miR-93, miR-365a-5p, miR-181c-3p, miR-494-5p, miR-331-5p, miR-134-5p, miR-191-5p, miR-486b-3p, miR-2285ad, miR-429-3p, miR-7641, novel\_79, miR-431, miR-302a-5p, miR-758-5p, miR-2411-5p, miR-582-3p, miR-134-5p, novel\_121, miR-1290, miR-134, miR-3578, miR-2427, miR-330-5p, miR-23b-5p, miR-411-3p, miR-105-2, miR-200b-3p, miR-3529-3p, miR-30a-3p, miR-181a-2-3p, miR-2284f, miR-450b-5p, miR-148b-5p, miR-200a, miR-29a-5p, miR-490-3p, miR-205-5p, miR-2285af, miR-200c, miR-30c-2-3p, miR-3071-3p, miR-339a, miR-17-3p, miR-450a-2-3p, miR-200c-3p, miR-127-5p, miR-200a-3p, miR-320b, miR-3120-3p, novel\_69, miR-34b, miR-3970, miR-21c, miR-3065-5p, miR-410-5p, miR-2319a, miR-146b-5p, miR-342-3p, miR-135a-2-3p, novel\_101, miR-495-3p, miR-17-3p, miR-2285x, novel\_27, miR-374c-5p, miR-449a, miR-326-3p, miR-4324, miR-576-3p, miR-20a-5p, miR-34c, miR-2284o, novel\_87, miR-379-3p, novel\_1, miR-31-5p, miR-133b-5p, miR-665, miR-339-5p, miR-377-5p, miR-3535, miR-3431, miR-149-5p, miR-2355-3p, miR-20b, miR-873a-5p, miR-1285, miR-197-3p, miR-3071-5p, miR-219a-1-3p, miR-7862, miR-130b-5p, miR-493-5p, miR-432-3p, miR-432-3p, miR-296-3p, miR-345-5p, miR-224-5p, miR-377-3p, miR-296-3p, miR-146a, miR-365b-5p, miR-190a, miR-105-5p, novel\_51, miR-106a-5p, miR-17-5p, miR-30c-1-3p, miR-140-5p, miR-221-5p, miR-2331-3p, miR-216b-3p, miR-377-3p, miR-216b-5p, miR-21a-3p, miR-27b-5p, miR-500a-3p, miR-487b-5p, miR-411, miR-339b, miR-345-5p, novel\_99, miR-186-5p, miR-539-5p, miR-145a-3p, miR-3958-5p, miR-425-5p, novel\_44, miR-224-5p, miR-338-3p, miR-30e-3p, miR-30a-3p, miR-338-5p, novel\_74, miR-450b-3p, miR-487b-miR-199c, miR-218-5p, novel\_111, miR-423-5p, miR-2284w, miR-212-3p, miR-2284j, miR-493-5p, miR-378j, miR-3065-5p, miR-3591-3p, miR-25, miR-411b-3p, miR-2483-3p, miR-203-3p, miR-677, miR-320c, miR-181b-3p, miR-7-1-3p, miR-320b, miR-365b-5p, novel\_51, miR-2284l, miR-193a, miR-2310, miR-130b-5p, miR-493-5p, miR-668-3p, miR-101a-5p, miR-21b, miR-2284x, miR-1434-3p, miR-125b-2-3p, novel\_23, miR-145a-5p, miR-455-3p, miR-2355-3p, miR-199b-3p, miR-181b-2-3p, miR-145b, miR-26b-3p, miR-708-5p, miR-28-5p, miR-130b-5p, miR-2284k, miR-135a-1-3p, miR-365a-5p, miR-3184-5p, miR-3184-3p, miR-2318, miR-1814c, miR-582-5p, miR-301, miR-320a, miR-582-5p, miR-21-3p, miR-2355-5p, miR-141-3p, miR-2284m, miR-202-5p, miR-320d, miR-200a-3p, miR-200a, miR-2285b, miR-181a-2-3p, miR-582-3p, miR-4429

FGB ENSOARGO( fibrinog

LOX ENSOARGO( lysyl ox

miR-8001-3p, miR-280-3p, miR-102-3p, miR-8002-3p, miR-1200-  
 5p, miR-877-3p, novel\_60, miR-32-3p, miR-212-3p, miR-  
 2285f, miR-452-5p, miR-181d-5p, miR-502-3p, miR-9-3p, miR-  
 154a, miR-371a-5p, miR-2284q, miR-105-1, miR-9788-3p, miR-  
 484, miR-30b-3p, miR-544a, miR-33a-5p, miR-326, miR-1306-  
 5p, miR-3085-3p, miR-3955-3p, miR-542-5p, miR-660-5p, miR-32-  
 3p, miR-21-3p, miR-544-3p, miR-139-5p, miR-6130, miR-22-  
 3p, miR-204-3p, miR-3613-5p, let-7f-1-3p, miR-27b-5p, let-7g-  
 3p, miR-2312, novel\_99, miR-4510, miR-206-3p, miR-338-3p, miR-  
 6134, miR-19b-1-5p, miR-450b-3p, miR-17-3p, miR-708-5p, miR-  
 548e-3p, miR-200b, miR-2904, miR-1193, miR-1197-5p, miR-  
 5703, let-7a-3p, miR-130a-5p, miR-146a-5p, miR-2411, miR-542-  
 5p, miR-216a-5p, miR-760-3p, miR-2404, miR-2285ab, miR-  
 21c, miR-18a-3p, miR-6395, miR-542-5p, miR-17-3p, miR-211, miR-  
 24-3p, miR-323c, miR-326-3p, novel\_27, miR-3613, miR-382-  
 5p, miR-92a-3p, novel\_1, miR-656-5p, miR-147-5p, miR-26b-  
 3p, miR-185-5p, miR-544b, miR-653, miR-181a-5p, miR-30b-  
 3p, miR-2284ab, miR-21-5p, miR-455-5p, miR-744-5p, miR-130b-  
 5p, miR-2483-5p, miR-654-3p, miR-296-3p, miR-345-5p, miR-455-  
 5p, miR-124-5p, miR-660, miR-141-3p, miR-154b-5p, miR-  
 3154, miR-10b-3p, miR-7144-5p, miR-23a-5p, miR-671-5p, miR-  
 1306-5p, miR-3607-3p, miR-6128, miR-103b, miR-374a-3p, miR-  
 410-5p, miR-551b-3p, miR-26c, miR-3969, miR-767-5p, miR-374b-  
 3p, miR-204-5p, miR-28-5p, miR-483-3p, miR-2411-5p, miR-345-  
 3p, miR-615-3p, miR-134, miR-218-2-3p, miR-501-3p, miR-105-  
 2, miR-200b-3p, miR-1, miR-181a-2-3p, miR-2284a, miR-200c, miR-  
 17-3p, miR-200c-3p, miR-181b-5p, miR-92a-3p, miR-139-5p, miR-  
 2284g, miR-211-5p, miR-25, miR-500-3p, miR-1185-2-3p, miR-  
 299b-5p, miR-181a-3p, miR-493-5p, miR-9-3p, miR-2447, miR-363-  
 3p, miR-3956-3p, miR-7705, miR-218-5p, miR-615, miR-490-  
 LAMA1 ENSOARGOC laminin, 5p, miR-1343-3p, miR-455-3p, miR-148b-5p, miR-421, miR-  
 miR-148b-5p, miR-146a-5p, miR-192-3p, miR-216c-5p, miR-  
 2285w, miR-3529-3p, miR-4286, miR-2284m, miR-450a-2-3p, miR-  
 3653-3p, novel\_96, miR-2285p, miR-185-3p, miR-2284h-5p, miR-  
 222, miR-411-3p, miR-582-3p, miR-155-5p, miR-148a-5p, miR-  
 3578, miR-2300b-3p, miR-29d-3p, miR-1434-5p, miR-140-3p, miR-  
 500b-5p, miR-6525, miR-144-5p, miR-138-5p, novel\_74, miR-155-  
 5p, miR-664a, miR-487a-5p, miR-2284k, miR-222-3p, miR-34c-  
 3p, miR-29b-3p, miR-19b-1-5p, miR-409-3p, miR-664a-5p, miR-  
 135a-5p, miR-499b-3p, miR-139-5p, novel\_32, miR-204-3p, miR-  
 155-5p, miR-2284n, miR-21-3p, miR-2318, miR-485-5p, miR-362-  
 5p, miR-3154, miR-2284l, miR-376b, miR-2284b, miR-491-5p, miR-  
 124-5p, miR-146b, miR-146a, miR-539-5p, miR-221-3p, miR-500-  
 5p, miR-148b-5p, miR-26b-3p, miR-138, miR-29b, miR-19b-2-  
 5p, miR-708-3p, miR-301b-5p, miR-541, miR-197-3p, miR-3071-  
 5p, miR-362-5p, novel\_27, miR-2284w, miR-2428, miR-135a-2-  
 3p, miR-3059-5p, miR-2447, miR-541-3p, miR-29c-3p, miR-  
 2284j, miR-628-3p, miR-3968, miR-29a, miR-502b, miR-2285n, miR-  
 2440, miR-301a-5p, miR-499a-3p, miR-29a-3p, miR-144-5p, miR-  
 669, miR-139-5p, miR-378b, miR-146b-5p, miR-135b-5p, miR-409-  
 SRFBP1 ENSOARGOC serum re 5p, miR-221, miR-3065-5p, miR-3591-3p

miR-199a-3p, miR-582-3p, miR-222-5p, miR-6516-5p, miR-299a-3p, miR-106a, miR-128-3p, miR-105-2, miR-300, miR-30a-5p, miR-2300b-3p, miR-146a-5p, miR-2432, miR-376a-5p, miR-125b-2-3p, miR-20a, miR-369-3p, miR-181a-2-3p, miR-30d, miR-299-3p, novel\_96, miR-2284m, miR-106a, miR-466i-5p, miR-30f, miR-374a-5p, miR-664-3p, novel\_17, miR-210-5p, miR-133c, miR-2284n, miR-6516, miR-544-3p, miR-300-3p, miR-499b-3p, miR-216b-3p, miR-2355-5p, miR-552-3p, miR-20b-5p, novel\_99, miR-1814c, miR-10b-3p, miR-93-5p, miR-655, miR-17-5p, miR-433-3p, miR-30d-5p, miR-381-3p, miR-30e-5p, miR-93, miR-1197-3p, miR-193a-5p, miR-665-5p, miR-425-5p, miR-374b, miR-129-5p, miR-708-5p, miR-28-5p, miR-6740-5p, miR-655-3p, miR-2285j, miR-2284k, miR-544b, miR-3535, miR-27a-3p, miR-222-5p, miR-26b-3p, miR-105-1, novel\_78, miR-27b-3p, miR-2284ab, miR-544a, miR-450b-5p, miR-4791, miR-2310, miR-2284l, miR-382, miR-363-5p, miR-23a-3p, miR-1388-3p, miR-106a-5p, miR-146b, miR-103a-2-5p, miR-491-5p, miR-105-5p, miR-2957, miR-106b-5p, miR-17-5p, miR-106a-5p, miR-199a-3p, miR-146a, miR-1306-5p, miR-144-3p, miR-203-3p, miR-27a-3p, miR-499a-3p, miR-3082-5p, miR-299b-3p, miR-499b-5p, miR-374b-5p, miR-664b, miR-146b-5p, miR-877-3p, miR-1306, miR-378j, miR-216a-3p, miR-374c-5p, miR-495-3p, miR-3059-5p, miR-885-5p, miR-2284q, miR-147-5p, miR-6119-3p, miR-382-5p, miR-107-5p, miR-142b, miR-20a-5p

MAP3K5

ENSOARGO(mitogen-

novel\_12, miR-1187-5p, miR-1200b, miR-200, miR-301-5p, miR-125b-5p, miR-2433, miR-486b-3p, miR-138-5p, miR-1271, miR-125a, miR-615-5p, miR-370-3p, miR-542-5p, miR-2355-5p, miR-874-3p, miR-154b-5p, miR-376c-5p, miR-485-5p, miR-7144-5p, miR-376c-5p, miR-4286, miR-1271-3p, miR-148b-5p, miR-30c-2-3p, miR-1260a, miR-543-5p, novel\_127, novel\_96, miR-17-3p, miR-1224-5p, miR-6517, miR-129-1-3p, miR-1271-5p, miR-2411-5p, miR-330-5p, miR-345-3p, miR-615-3p, miR-885-3p, miR-17-3p, miR-193b-3p, miR-326-3p, miR-24-3p, miR-6529b, miR-147-5p, miR-320b, miR-3074-5p, miR-18a-3p, miR-1306, miR-376b-5p, miR-2285ab, miR-6395, miR-1291, miR-628-5p, miR-296-3p, miR-432-3p, miR-2411-3p, novel\_51, miR-296-3p, miR-193a-3p, miR-125a-5p, miR-187-3p, miR-411-5p, miR-194-3p, miR-3431, miR-2285g, miR-22-3p, miR-744-5p, miR-7862, miR-1260b, miR-138, miR-665-5p, miR-214, miR-425-5p, miR-1271, miR-129-2-3p, miR-3074-5p, miR-4510, miR-338-3p, miR-3184-5p, miR-665, miR-4492, miR-874-5p, miR-664a, miR-17-3p, miR-552-3p, miR-504-5p, miR-221-5p, miR-30c-1-3p, miR-151b, miR-22-3p, miR-193b-3p, miR-6130, miR-129b-3p, miR-2285c, miR-186-5p, miR-1827, miR-1895, miR-885-3p, miR-2312, miR-345-3p, miR-216c-5p, miR-486-3p, miR-2411, miR-125b, miR-185-3p, miR-345-3p, miR-324-3p, miR-210-5p, miR-21-3p, miR-221-5p, miR-760-3p, miR-212-5p, miR-3960, miR-18a-3p, miR-328-3p, miR-151-5p, miR-1197-5p, miR-5703, miR-188-3p, miR-2904, novel\_133, miR-148a-5p, miR-941, miR-2285f, miR-3956-3p, novel\_60, miR-7705, miR-423-5p, miR-615, novel\_82, miR-2285n, miR-4726-5p, miR-3968, miR-7977, miR-452-3p, miR-4443, miR-3596, miR-136-5p, miR-504, miR-299b-5p, miR-96-5p, miR-4532, miR-30c-1-3p, novel\_19, miR-1306-5p, miR-326, miR-214-3p, miR-491-5p, novel\_78, miR-2300a-5p, miR-2285e, miR-148b-5p, miR-9788-3p, miR-1298-5p, miR-296-5p, miR-

RNPEP

ENSOARGO(arginyl

miR-20a-5p, miR-200b-5p, miR-1-1-5p, miR-912b-5p, miR-378f, miR-195a-5p, miR-2319a, miR-9851-3p, miR-146b-5p, miR-410-5p, miR-378b, miR-3591-3p, miR-150-5p, miR-376b-5p, miR-2284w, miR-326-3p, miR-211, miR-495-3p, miR-29c-3p, miR-2285x, miR-1a-1-5p, miR-335-5p, novel\_120, miR-625-3p, novel\_1, miR-29a, miR-92a-3p, miR-16a, miR-28c, miR-576-3p, miR-20a-5p, miR-15a, miR-20b, miR-134-3p, miR-2284d, miR-412-5p, miR-3535, miR-26b-3p, miR-187-3p, miR-3955-5p, miR-31-5p, miR-188-5p, miR-27b-3p, miR-2284x, miR-7862, miR-497-5p, miR-219a-1-3p, miR-16b, miR-29b, miR-30b-3p, miR-197-3p, miR-223-3p, miR-1843b-5p, miR-653, miR-654-3p, miR-628-5p, miR-101-5p, miR-668-3p, miR-363-5p, miR-6240, miR-660, novel\_51, miR-17-5p, miR-106a-5p, miR-32, miR-105-5p, miR-330-3p, miR-146a, miR-2284n, miR-25-3p, miR-2285aa, miR-671-5p, miR-190a-3p, miR-376c-5p, miR-20b-5p, let-7g-3p, miR-767, miR-376c-5p, miR-17-5p, miR-93-5p, miR-488-3p, miR-378c, miR-93, miR-16-5p, miR-1306-5p, miR-204-5p, miR-28-5p, miR-410-3p, miR-767-5p, miR-6740-5p, novel\_63, miR-29b-3p, miR-1-5p, miR-2284k, miR-582-3p, miR-1271-5p, miR-378h, miR-322-5p, miR-299a-3p, miR-105-2, miR-411-3p, miR-330-5p, miR-218-2-3p, miR-2427, miR-29d-3p, miR-490-3p, miR-2285b, miR-2284a, miR-200a, miR-29a-5p, miR-1957a, miR-2284y, miR-28b, miR-450b-5p, miR-92b-3p, miR-92a-3p, miR-1a-2-5p, miR-2898, miR-30c-2-3p, miR-3071-3p, miR-6119-5p, miR-2285af, miR-27a-3p, miR-4443, miR-203-3p, miR-378e, miR-378g, miR-211-5p, miR-541-5p, miR-2319b, miR-2284g, miR-96-5p, miR-129b-5p, miR-154a, miR-1285-5p, miR-8095, miR-2284j, miR-3059-5p, miR-2447, miR-2285t, miR-335, miR-3968, miR-107-5p, miR-101-3p, miR-147a, miR-539-5p, miR-1298-3p, miR-27a-3p, miR-5010-3p, miR-330-3p, miR-105-1, miR-PLXDC2 ENSOARGO(plexin d 409b, miR-3120-5p, miR-450b-5p, miR-101a-5p, miR-378c, miR-

miR-602-5p, miR-211-5p, miR-128-1-5p, miR-100-5p, miR-211-5p, miR-7641, novel\_79, miR-412, miR-18b-5p, miR-2285ad, miR-6517, let-7a-2-3p, miR-1343-5p, miR-330-5p, miR-501-3p, miR-23b-5p, miR-3591-5p, miR-200a, miR-2284y, miR-2284a, miR-2478, miR-28b, miR-92b-3p, miR-2403, novel\_127, miR-543-5p, novel\_96, miR-92a-3p, miR-152-3p, miR-181b-5p, miR-127-5p, miR-3071-3p, miR-339a, miR-1260a, miR-205-5p, miR-664-3p, miR-154b-5p, miR-769, miR-365a-3p, miR-25-3p, miR-2285aa, miR-3956, miR-874-3p, miR-7144-5p, miR-23a-5p, miR-376c-5p, miR-1248, miR-2318, miR-376c-5p, miR-18a, miR-3154, miR-488-3p, miR-301, miR-145-3p, miR-1260b, miR-193a-5p, miR-2284v, miR-28-5p, miR-486b-3p, miR-26c, miR-100-3p, miR-2284k, novel\_63, miR-194-3p, miR-2355-3p, miR-544b, miR-2284d, miR-412-5p, miR-339-5p, miR-26b-3p, miR-133b-5p, miR-744-5p, miR-7862, miR-188-5p, miR-2284x, miR-2284ab, miR-1260b, miR-374b-3p, miR-7b-5p, miR-181a-5p, miR-1843b-5p, let-7a-2-3p, miR-654-3p, miR-382, miR-668-3p, miR-130b-5p, miR-493-5p, miR-1343-5p, miR-660, miR-483-3p, miR-32, miR-3141, novel\_51, miR-7-5p, miR-6535, miR-670-3p, miR-374c-3p, miR-320b, miR-3120-3p, miR-3074-5p, miR-6395, miR-1291, miR-412-3p, miR-1306, miR-378b, miR-3591-3p, miR-18a-3p, miR-376b-5p, miR-148a-3p, miR-3141, miR-18b, miR-326-3p, miR-374c-5p, miR-1307-3p, miR-135a-2-3p, miR-203b-5p, miR-147-5p, miR-6119-3p, miR-92a-3p, novel\_87, miR-502-5p, miR-4324, miR-28c, miR-6402, miR-2284h-5p, miR-532-3p, miR-328-3p, miR-148b-3p, miR-18a-3p, miR-2284u, miR-378d, miR-148a-5p, miR-493-3p, miR-2904, miR-1434-5p, miR-1197-5p, miR-2411, miR-486-3p, miR-2432, miR-376a-5p, miR-125b-2-3p, miR-130a-5p, miR-345-3p, miR-216c-5p, miR-2285w, miR-1277-5p, miR-30b-3p, miR-21-3p, miR-2284m, miR-760-3p, miR-466i-5p, miR-GRAMD1B ENSOARGOC GRAM dom.219b-5p, miR-204-3p, miR-877-5p, miR-544-3p, miR-216b-5p, miR-

miR-135a-2-3p, miR-326-3p, miR-449a, miR-34c, miR-4324, miR-20a-5p, miR-203b-5p, miR-92a-3p, miR-206, miR-7-1-3p, miR-669, novel\_69, miR-34b, miR-3065-5p, miR-3591-3p, miR-3141, miR-146b-5p, miR-450b-3p, miR-1291, miR-412-3p, miR-363-5p, miR-345-5p, miR-3141, miR-32, miR-2331-5p, novel\_51, miR-106a-5p, miR-17-5p, miR-146a, miR-377-3p, miR-1343-5p, miR-125a-5p, miR-483-3p, miR-194-3p, miR-20b, miR-708-3p, miR-4508, miR-26a-2-3p, miR-744-5p, miR-138, miR-219a-1-3p, miR-93, miR-125b-5p, miR-31-3p, miR-138-5p, miR-2355-5p, miR-615-5p, miR-125a, miR-34c-5p, miR-300-3p, miR-25-3p, miR-3959-5p, miR-93-5p, miR-17-5p, miR-3154, miR-20b-5p, miR-345-5p, miR-3064-5p, novel\_39, miR-92b-3p, novel\_96, miR-92a-3p, miR-127-5p, miR-6517, miR-483-3p, miR-1343-5p, miR-330-5p, miR-2447, miR-4454, miR-363-3p, miR-541-3p, miR-877-3p, miR-1973, miR-3064-5p, miR-3082-5p, miR-361-3p, miR-140-5p, miR-1983, miR-877-3p, miR-504, miR-1388-3p, miR-106a-5p, miR-8485, miR-106b-5p, miR-326, miR-146b, miR-214-3p, miR-491-5p, miR-3085-3p, miR-1343-3p, miR-9788-3p, miR-216a-3p, miR-147a, miR-541, miR-143-5p, miR-214, miR-145a-3p, miR-6134, miR-206-3p, miR-665, miR-4492, miR-21-3p, miR-216b-3p, miR-552-3p, miR-504-5p, miR-32-5p, miR-2331-3p, miR-204-3p, miR-377-3p, miR-27a-5p, miR-345-5p, miR-20a, miR-146a-5p, miR-125b, miR-185-3p, miR-34b-5p, miR-2484, miR-106a, miR-212-5p, miR-548e-3p, miR-106a, miR-532-3p, miR-7859, miR-5703, miR-188-3p, miR-1197-5p, novel\_133, miR-2366, miR-2300b-3p, miR-34a-5p

LLGL1

ENSOARGO lethal





miR-139-5p, miR-4443, miR-499a-3p, miR-378g, miR-140-5p, novel\_94, miR-299b-5p, miR-504, miR-181d-5p, miR-2284j, miR-219a-5p, miR-3059-5p, miR-423-5p, miR-877-3p, miR-371a-5p, miR-301a-5p, novel\_82, miR-2285t, miR-4726-5p, miR-3968, miR-1343-3p, novel\_78, novel\_4, miR-216a-3p, miR-9788-3p, miR-455-3p, miR-1298-3p, miR-539-5p, miR-1a-3p, miR-7857, miR-30b-3p, miR-301b-5p, miR-10b, miR-2284aa, miR-299a-5p, miR-2426, miR-1388-3p, miR-424-5p, miR-4532, miR-193a, miR-30c-1-3p, miR-29b-1-5p, miR-16b, novel\_115, miR-146b, miR-214-3p, miR-3085-3p, miR-491-5p, miR-25-5p, miR-3065-3p, miR-216b-3p, miR-296-3p, miR-30c-1-3p, miR-504-5p, miR-545-3p, miR-1277-3p, miR-22-3p, miR-15b-5p, miR-499b-3p, miR-10a, miR-132-5p, miR-139-5p, miR-6130, miR-129b-3p, miR-1827, miR-345-5p, miR-339b, miR-3074-2-3p, miR-214, miR-539-5p, miR-3074-5p, miR-4510, miR-3184-3p, miR-3184-5p, miR-338-3p, miR-181c-5p, miR-10b-5p, miR-6525, miR-206-3p, miR-30a-3p, miR-664a-5p, miR-665, miR-320e, miR-30e-3p, miR-424-5p, miR-708-5p, miR-17-3p, miR-30d-3p, miR-15a-5p, miR-2904, miR-5703, miR-1197-5p, miR-140-3p, novel\_133, miR-133a-3p, miR-34a-5p, miR-33b-3p, miR-142-3p, miR-5100, miR-345-3p, miR-503-5p, miR-486-3p, miR-146a-5p, miR-29b-1-5p, miR-130a-5p, miR-324-3p, miR-185-3p, miR-345-3p, miR-196a-3p, miR-210-5p, miR-34b-5p, miR-3653-3p, miR-2284m, miR-760-3p, miR-320b, miR-10a-5p, novel\_68, miR-378b, miR-3074-5p, miR-146b-3p, miR-29a-3p, miR-34b, miR-378b, miR-3065-5p, miR-376b-5p, miR-2387, miR-3141, miR-146b-5p, miR-9851-3p, miR-195a-5p, miR-17-3p, miR-29c-3p, miR-135a-2-3p, miR-374c-5p, miR-449a, miR-2428, miR-211, miR-16a, miR-34c, miR-4324, miR-15a, miR-28c, miR-656-5p, miR-147-5p, miR-29a, miR-339-5p, miR-187-3p, miR-149-5p, novel\_116, miR-412-5p, miR-2284d, miR-134-3p, miR-

SLC22A6

ENSOARGO(solute c

miR-512, miR-188a-3p, miR-188-3p, miR-17-3p, miR-181-3p, miR-224-5p, miR-124-5p, miR-187-3p, miR-20b, miR-2355-3p, miR-6238, miR-185-5p, miR-432-5p, miR-145a-5p, miR-181a-5p, miR-7862, miR-2889, miR-30b-3p, miR-138, miR-380-3p, novel\_101, miR-495-3p, miR-17-3p, miR-3957-3p, miR-136-3p, miR-342-3p, miR-449a, miR-16a, miR-34c, miR-20a-5p, miR-6402, miR-15a, miR-147-5p, miR-656-5p, miR-22-5p, novel\_1, miR-128-1-5p, miR-10a-5p, miR-670-3p, miR-34b, miR-146b-3p, miR-323a-5p, miR-18a-3p, miR-2387, miR-195a-5p, miR-379-5p, miR-376a-2-5p, miR-19a-3p, miR-181a-2-3p, miR-29b-2-5p, miR-3529-3p, miR-1271-3p, miR-1957a, miR-199a-5p, miR-28b, miR-380-5p, miR-200c, miR-200c-3p, miR-181b-5p, miR-17-3p, miR-450a-2-3p, miR-2898, miR-376a-5p, miR-378h, miR-2411-5p, miR-134, miR-10a-5p, miR-105-2, miR-1306-5p, miR-378c, miR-93, miR-3969, miR-1306-3p, miR-138-5p, miR-215-5p, miR-598-3p, miR-370-3p, miR-154b-5p, miR-199a-5p, miR-365a-3p, miR-769, miR-34c-5p, miR-374c-3p, miR-17-5p, miR-3154, miR-2448-3p, miR-485-5p, miR-671-5p, miR-1839-3p, miR-424-5p, miR-494-3p, miR-106a-5p, miR-758-3p, miR-4532, miR-1306-5p, miR-5126, miR-342, miR-1468, miR-105-1, miR-2300a-5p, miR-30b-3p, miR-10b, miR-484, miR-378b, miR-3120-5p, miR-299a-5p, miR-378c, miR-452-5p, miR-181d-5p, miR-541-3p, novel\_60, miR-219a-2-3p, miR-107-5p, miR-1973, miR-769-5p, miR-2285t, miR-335, miR-4726-5p, miR-378e, miR-199b-5p, novel\_94, miR-20a, miR-216c-5p, miR-2411, miR-130a-5p, miR-196a-3p, miR-30b-3p, miR-34b-5p, miR-466i-5p, miR-760-3p, miR-106a, miR-199a-3p, novel\_83, miR-532-3p, miR-15a-5p, miR-1197-5p, miR-1193, miR-140-3p, miR-2904, miR-2300b-3p, miR-215-5p, miR-2408, novel\_133, miR-19b-3p, miR-3074-2-3p, miR-4510, miR-378c, miR-338-3p, miR-10b-5p, miR-29b-2-5p, miR-324-3p, miR-FAM217A ENSOARGO family w 424-5p, miR-17-3p, miR-378a-3p, miR-140-5p, novel\_32, miR-22-

miR-101, miR-3100, miR-3120-3p, miR-3100, novel\_1, miR-2459, miR-1306-5p, miR-326, miR-320b, miR-214-3p, let-7e, miR-3085-3p, miR-33a-5p, miR-23a-3p, miR-1388-3p, let-7a-5p, miR-30c-1-3p, miR-378d, miR-129b-5p, miR-1306-3p, miR-9-3p, miR-877-3p, miR-211-5p, miR-20a-3p, miR-3064-5p, let-7d-5p, miR-378g, miR-378e, miR-499a-3p, miR-2285y, miR-335, miR-3968, miR-4726-5p, miR-190b-5p, miR-181d-5p, miR-3059-5p, miR-7705, miR-423-5p, miR-361-3p, miR-188-3p, miR-378a-3p, miR-1961, miR-2408, miR-378i, miR-378d, miR-34a-5p, novel\_73, miR-4429, miR-30d-3p, miR-548e-3p, miR-532-3p, miR-200b, miR-7859, miR-23b-3p, miR-422a, novel\_17, miR-196a-3p, miR-21-3p, let-7k, miR-34b-5p, miR-99a-3p, miR-760-3p, miR-466i-5p, miR-98-5p, miR-2284m, miR-320d, miR-329a-5p, miR-143-3p, miR-486-3p, miR-376c-3p, miR-376a-5p, miR-433-3p, miR-1827, miR-543-3p, miR-3065-3p, miR-216b-3p, miR-30c-1-3p, miR-2331-3p, miR-378a-3p, let-7i-5p, miR-376e-3p, miR-499b-3p, miR-320e, miR-30a-3p, miR-30e-3p, let-7f, miR-708-5p, miR-190a-5p, miR-129-5p, miR-4492, miR-664a, miR-214, miR-129-2-3p, miR-378c, let-7b, miR-181c-5p, miR-338-3p, miR-6134, let-7b-5p, miR-3184-5p, miR-6525, novel\_23, miR-374b-3p, miR-181a-5p, miR-1285, miR-7b-5p, miR-708-3p, miR-1260b, miR-29b, miR-665, miR-31-5p, miR-3955-5p, miR-149-5p, miR-134-3p, let-7g-5p, miR-3431, miR-2331-5p, miR-190a, miR-7-5p, miR-196b-5p, miR-382, miR-654-3p, miR-1306, miR-150-5p, miR-2387, miR-378f, let-7e-5p, miR-329-5p, novel\_68, miR-320c, miR-669, miR-34b, miR-29a-3p, let-7i, miR-382-5p, miR-34c, miR-28c, miR-6123, miR-147-5p, miR-502b, miR-656-5p, miR-29a, miR-29c-3p, miR-335-5p, miR-135a-2-3p, miR-2428, miR-326-3p, miR-449a, miR-211, miR-330-5p, miR-29d-3p, miR-196a-5p, miR-200b-3p, let-7d, miR-429-3p, miR-6517, miR-2285ad, miR-129-1-3p, miR-378h, let-7c-5p, miR-30f, miR-30c-2-3p, miR-200c, miR-214, miR-2428, miR-877-5p, miR-214-3p, miR-9788-3p, miR-409-3p, miR-218-5p, miR-2285j, miR-2332, miR-487a-5p, miR-628-3p, novel\_1, miR-452-5p, miR-539-5p, miR-378c, novel\_27, miR-378c, miR-411, miR-378f, let-7g-3p, miR-378a-3p, miR-499b-3p, miR-499a-3p, miR-378e, miR-197-5p, miR-30f, miR-422a, let-7c-3p, miR-376b, miR-378d, miR-378a-3p, miR-378i, miR-378b, miR-16-1-3p, miR-378c, miR-16-1-3p, miR-582-3p, miR-9788-3p, miR-378h

PPP1R16B ENSOARGO( protein 3431

HYI ENSOARGO( hydroxyp 3431

PHC3 ENSOARGO( polyhome 3431

miR-103b, miR-1197-3p, miR-224-5p, miR-10b-5p, miR-409-3p, miR-338-5p, miR-410-5p, miR-2284k, novel\_63, miR-130b-5p, miR-592, miR-664a, miR-2285aa, miR-503-3p, miR-496-3p, miR-204-3p, miR-323-5p, miR-10a, miR-374c-3p, miR-2284s, miR-433-3p, novel\_99, miR-1827, miR-485-5p, miR-671-5p, miR-7144-5p, miR-345-5p, miR-345-5p, miR-3529-3p, miR-329a-5p, miR-2424, miR-29b-1-5p, miR-500a-5p, miR-200c, miR-21-3p, miR-200c-3p, miR-760-3p, miR-3600, miR-429-3p, miR-582-3p, miR-532-3p, miR-545-5p, miR-200b, miR-7859, miR-1197-5p, miR-188-3p, novel\_133, miR-2284u, miR-148a-5p, miR-10a-5p, miR-496, miR-200b-3p, miR-2284j, miR-2285f, miR-2447, miR-154a, miR-107-5p, miR-218-5p, miR-656-5p, miR-7977, miR-10a-5p, miR-3120-3p, miR-655-5p, miR-10b, miR-329-5p, miR-2319b, miR-20a-3p, novel\_68, miR-2284g, miR-1185-2-3p, miR-203-3p, miR-670-3p, miR-323a-5p, miR-2285ab, miR-544-5p, novel\_94, miR-2319a, miR-136-5p, miR-33a-5p, let-7f-2-3p, let-7f-2-3p, miR-2284b, miR-130b-5p, miR-1b-5p, miR-345-5p, miR-2285r, miR-29b-1-5p, miR-224-5p, miR-103a-2-5p, miR-452-5p, miR-145b, miR-3955-5p, miR-31-5p, miR-2459, miR-1185-3p, miR-455-3p, miR-149-5p, miR-148b-5p, miR-1298-3p, miR-3431, miR-496-5p, miR-30b-3p, miR-145a-5p, miR-10b, miR-

COPS5 ENSOARGO(COP9 sig:6529a, miR-484, miR-2284x, miR-30b-3p miR-2284x, miR-16-1-3p, miR-2426, miR-380-3p, miR-2284ab, novel\_23, miR-301b-5p, miR-484, miR-2459, miR-216a-3p, miR-6238, miR-130a-3p, miR-665, miR-130b-3p, miR-483-3p, miR-224-5p, miR-199a-3p, miR-654-3p, miR-2330-5p, miR-668-5p, miR-19a-3p, miR-3065-5p, miR-2387, novel\_69, miR-411b-3p, miR-499a-3p, miR-7-1-3p, miR-3120-3p, miR-329-5p, miR-3964, miR-379-3p, miR-301a-5p, miR-576-3p, miR-502-5p, miR-154a, miR-301b-3p, miR-9-5p, miR-1a-1-5p, miR-219b-3p, miR-664-5p, miR-16-1-3p, miR-19b-3p, miR-411-3p, miR-5703, miR-199a-3p, miR-483-3p, miR-340-5p, miR-6516-5p, miR-9-5p, miR-7859, miR-548e-3p, miR-1a-2-5p, miR-760-3p, miR-2284m, miR-6119-5p, miR-2285af, miR-380-3p, miR-29a-5p, miR-3065-3p, miR-1957a, miR-345-3p, miR-369-3p, miR-3529-3p, miR-329a-5p, novel\_99, miR-1827, miR-2318, miR-329b, miR-876-3p, let-7g-3p, miR-655, miR-503-3p, miR-21a-3p, miR-216b-5p, miR-6130, miR-499b-3p, miR-6516, miR-532-5p, miR-3065-3p, miR-2285aa, miR-548o-3p, miR-140-5p, miR-454-3p, miR-6516-3p, miR-655-3p, miR-100-3p, miR-1-5p, miR-224-5p, miR-3074-2-3p, miR-

SLC13A1 ENSOARGO(solute c:4510, miR-590-3p, miR-539-5p

|       |                   |                                                                                                                                                                                                                                                                                                                                                                                                                                                                                                                                                                                                                                                                                                                                                                                                                                                                                                                                                                                                                                                                                                                                                                                                                                                                                                                                                                                                                                                                                                                                                                                                                                                                                                                                                                                                                                                                                                                                                                                                                                                                                                                                                                                                                                                                                                                                                                                                                                                                                                                                                                                                                                                                                                                                                                                                                                                                   |
|-------|-------------------|-------------------------------------------------------------------------------------------------------------------------------------------------------------------------------------------------------------------------------------------------------------------------------------------------------------------------------------------------------------------------------------------------------------------------------------------------------------------------------------------------------------------------------------------------------------------------------------------------------------------------------------------------------------------------------------------------------------------------------------------------------------------------------------------------------------------------------------------------------------------------------------------------------------------------------------------------------------------------------------------------------------------------------------------------------------------------------------------------------------------------------------------------------------------------------------------------------------------------------------------------------------------------------------------------------------------------------------------------------------------------------------------------------------------------------------------------------------------------------------------------------------------------------------------------------------------------------------------------------------------------------------------------------------------------------------------------------------------------------------------------------------------------------------------------------------------------------------------------------------------------------------------------------------------------------------------------------------------------------------------------------------------------------------------------------------------------------------------------------------------------------------------------------------------------------------------------------------------------------------------------------------------------------------------------------------------------------------------------------------------------------------------------------------------------------------------------------------------------------------------------------------------------------------------------------------------------------------------------------------------------------------------------------------------------------------------------------------------------------------------------------------------------------------------------------------------------------------------------------------------|
| SNX31 | ENSOARGO(sorting) | <p>miR-345-3p, miR-361-5p, miR-142-3p, miR-184-3p, miR-129-1-3p, miR-2284z, miR-582-3p, miR-9-5p, miR-23b-3p, miR-345-3p, miR-1260a, miR-30b-3p, miR-3653-3p, miR-181b-5p, miR-29b-2-5p, miR-195a-3p, miR-142a-3p, miR-24-2-5p, miR-148b-5p, miR-450b-5p, miR-433-3p, let-7f-1-3p, miR-671-5p, miR-3074-1-3p, miR-10b-3p, miR-216b-3p, miR-2285aa, miR-133c, miR-29b-2-5p, miR-5100, let-7b-3p, miR-129-2-3p, miR-181c-5p, miR-145-3p, miR-10b-3p, miR-1260b, miR-181a-5p, miR-653, miR-2284aa, miR-1260b, miR-105-1, miR-6238, miR-142-3p, miR-1298-3p, miR-153, miR-2411-3p, miR-105-5p, miR-153-3p, miR-23a-3p, miR-101-5p, miR-382-3p, miR-381-3p, miR-9-3p, miR-7689-3p, miR-24-1-5p, miR-3082-5p, miR-382-3p, miR-6123, miR-3958-3p, miR-495-3p, miR-181d-5p, miR-9-5p, miR-3059-5p, miR-9-3p, miR-24-3p</p> <p>miR-323-5p, miR-2284n, miR-370-5p, miR-370-3p, miR-182-5p, miR-329a, miR-30f, miR-625-5p, miR-7144-5p, miR-30e-5p, miR-381-3p, miR-30d-5p, miR-23b, miR-362-5p, miR-500b-5p, miR-6134, miR-2284v, miR-708-5p, miR-130b-5p, miR-28-5p, miR-2285j, miR-2433, miR-370-5p, miR-331-3p, miR-665, miR-664a-5p, miR-23b-3p, miR-23c, miR-1247-5p, miR-2284z, miR-2284h-5p, miR-2285ad, miR-493-3p, miR-300, miR-19b-3p, miR-105-2, miR-30c, miR-148a-5p, miR-30c-5p, miR-362-3p, miR-30a-5p, miR-1197-5p, miR-148b-5p, miR-2432, miR-450c-5p, miR-490-3p, miR-2285w, miR-503-5p, miR-4286, miR-2284m, miR-107, miR-30d, miR-21-3p, miR-30b, miR-30f, miR-500a-5p, miR-323a-5p, miR-3596, miR-670-3p, miR-677, miR-181b-3p, miR-541-5p, miR-320b, miR-3120-3p, miR-7977, miR-19a-3p, miR-107, miR-361-3p, miR-150-5p, miR-378b, miR-362-5p, miR-877-3p, miR-361-3p, miR-8095, miR-2284w, miR-885-5p, miR-335-5p, miR-1193, miR-450a-5p, miR-335, miR-30b-5p, miR-2285n, miR-6402, miR-2285y, miR-503-5p, miR-9788-3p, miR-500-5p, miR-103, miR-3955-5p, miR-105-1, miR-103a-3p, miR-181b-2-3p, miR-2284ab, miR-362-3p, miR-381-5p, miR-2284aa, miR-744-5p, miR-484, miR-329-3p, miR-7b-5p, miR-2285r, miR-6412, miR-4532, miR-8485, miR-130b-5p, miR-23a-3p, miR-628-5p, novel_124, miR-2285l, miR-381-5p, miR-503-5p, miR-7-5p, miR-105-5p, miR-362-3p, miR-2957, miR-182-5p</p> <p>miR-10a-5p, miR-497-5p, miR-664-5p, miR-16b, miR-450c-3p, miR-10b, novel_121, miR-450a-1-3p, miR-545-5p, miR-15a-5p, miR-322-5p, miR-26b-3p, miR-31-5p, miR-146b, miR-378a-5p, miR-450a-2-3p, miR-16b, miR-185-3p, miR-92a-1-5p, miR-182-5p, miR-146a, miR-146a-5p, miR-2424, let-7c-3p, miR-424-5p, miR-195a-5p, miR-146b-5p, miR-10b-3p, miR-1291, miR-129b-5p, miR-378b, miR-450a-1-3p, miR-488-3p, miR-15b-5p, novel_69, miR-6130, miR-146b-3p, miR-10a, miR-7977, miR-10a-5p, miR-182-5p, miR-370-3p, miR-2355-5p, miR-424-5p, miR-31-3p, miR-450b-3p, miR-3604, miR-16a, miR-133a-5p, miR-15a, miR-145-3p, miR-10b-5p, miR-16-5p, miR-4510, novel_42</p> |
| CTTN  | ENSOARGO(contact) |                                                                                                                                                                                                                                                                                                                                                                                                                                                                                                                                                                                                                                                                                                                                                                                                                                                                                                                                                                                                                                                                                                                                                                                                                                                                                                                                                                                                                                                                                                                                                                                                                                                                                                                                                                                                                                                                                                                                                                                                                                                                                                                                                                                                                                                                                                                                                                                                                                                                                                                                                                                                                                                                                                                                                                                                                                                                   |
| NUMB  | ENSOARGO(num hom) |                                                                                                                                                                                                                                                                                                                                                                                                                                                                                                                                                                                                                                                                                                                                                                                                                                                                                                                                                                                                                                                                                                                                                                                                                                                                                                                                                                                                                                                                                                                                                                                                                                                                                                                                                                                                                                                                                                                                                                                                                                                                                                                                                                                                                                                                                                                                                                                                                                                                                                                                                                                                                                                                                                                                                                                                                                                                   |

miR-27a-3p, novel\_4, miR-216a-3p, miR-9788-3p, miR-30b-3p, miR-296-5p, miR-3120-5p, miR-2426, miR-544a, miR-376b, miR-494-3p, miR-424-5p, let-7a-5p, miR-30c-1-3p, miR-1306-5p, novel\_115, miR-5126, miR-326, miR-342, miR-320b, let-7e, miR-3085-3p, novel\_124, miR-7977, miR-3064-5p, miR-27a-3p, let-7d-5p, miR-7857-3p, miR-361-3p, novel\_94, miR-1296-5p, miR-2285f, miR-541-3p, novel\_60, miR-769-5p, miR-1973, miR-30b-5p, miR-2284q, miR-335, miR-1b-3p, miR-548e-3p, miR-532-3p, miR-200b, miR-383-5p, miR-188-3p, miR-1197-5p, miR-5703, miR-140-3p, miR-2904, miR-2300b-3p, miR-378d, miR-4429, miR-19b-3p, miR-146a-5p, miR-2411, miR-29b-1-5p, miR-125b, miR-185-3p, miR-196a-3p, miR-21-3p, miR-299-3p, miR-30b-3p, miR-30d, miR-320d, miR-341-3p, miR-532-5p, miR-370-5p, miR-3065-3p, miR-22-3p, miR-204-3p, miR-193b-3p, miR-544-3p, miR-21a-3p, miR-30f, miR-18a-5p, miR-2312, miR-145a-3p, miR-539-5p, miR-6134, let-7b-5p, miR-487a-5p, miR-708-5p, miR-424-5p, miR-664a, miR-133b-5p, miR-103, miR-503-5p, miR-185-5p, let-7g-5p, miR-432-5p, miR-145a-5p, miR-1285, miR-1434-3p, miR-455-5p, miR-219a-1-3p, miR-138, miR-29b, miR-30b-3p, miR-455-5p, miR-330-3p, miR-503-5p, miR-224-5p, miR-1343-5p, miR-452-5p, miR-125a-5p, miR-124-5p, miR-29a-3p, miR-146b-3p, miR-2404, miR-378b, miR-18a-3p, miR-18b, miR-2285ab, miR-195a-5p, miR-6395, miR-9851-3p, miR-19a-3p, miR-107, miR-1291, miR-450b-3p, miR-495-3p, novel\_101, miR-1193, miR-3957-3p, miR-342-3p, miR-2428, miR-326-3p, miR-24-3p, let-7i, miR-16a, miR-15a, miR-203b-5p, miR-2411-5p, miR-483-3p, miR-30a-5p, miR-29d-3p, miR-345-3p, miR-200b-3p, let-7d, miR-1271-3p, miR-3065-3p, miR-1957a, miR-28b, miR-339a, let-7c-5p, miR-30c-2-3p, miR-200c, miR-2285af, miR-107, miR-200c-3p, miR-191-3p, miR-450a-2-3p, miR-2898, miR-370-3p, miR-3957-5p, miR-151b-5p, miR-3957, miR-365a-3p, miR-769, miR-18a, miR-378j, miR-1193, miR-197-5p, miR-379-5p, miR-1248, novel\_111, miR-432-3p, miR-3596

ADGRG5 ENSOARGO( adhesion

TTC17 ENSOARGO( tetraatri

miR-423-5p, miR-361-3p, miR-2285f, miR-17-3p, miR-219a-5p, miR-2284j, miR-3059-5p, miR-541-3p, miR-4726-5p, miR-2285n, miR-2440, miR-6535, miR-320c, miR-3596, miR-499a-3p, miR-670-3p, miR-320b, miR-10a-5p, miR-7977, miR-2284g, miR-10b, miR-1291, miR-1306, miR-378b, miR-2285ab, miR-361-3p, miR-2387, miR-2285r, miR-23a-3p, let-7c-3p, miR-130b-5p, miR-2330-5p, miR-483-3p, miR-491-5p, miR-29b-1-5p, miR-320b, miR-7-5p, miR-1306-5p, miR-9788-3p, miR-2284d, miR-4508, miR-30b-3p, miR-1260b, miR-30b-3p, miR-7b-5p, miR-10b, miR-541, miR-1843b-5p, miR-3184-5p, miR-338-3p, miR-10b-5p, miR-1260b, miR-129-2-3p, miR-2284v, miR-500, miR-708-5p, miR-486b-3p, miR-130b-5p, miR-28-5p, miR-17-3p, miR-29b-2-5p, miR-665, miR-320e, miR-2284k, miR-2433, miR-2285j, miR-2284n, miR-10a, miR-499b-3p, miR-370-3p, miR-7144-5p, miR-23a-5p, miR-671-5p, miR-500a-3p, miR-320a, miR-23b, miR-200a, miR-486-3p, novel\_39, miR-2284y, miR-2285b, miR-2478, miR-29b-1-5p, miR-29b-2-5p, miR-543-5p, novel\_96, miR-320d, miR-17-3p, miR-185-3p, miR-217, miR-1260a, miR-582-3p, miR-129-1-3p, miR-23b-3p, miR-23c, miR-483-3p, miR-1b-3p, miR-2285ad, miR-423-3p, miR-2284u, miR-10a-5p, miR-493-3p, miR-582-3p, miR-4429, miR-2904, miR-217-5p, miR-1197-5p, miR-23b-5p, miR-5703, novel\_133, miR-2300b-3p, miR-2366 miR-127/1-3p, miR-490-3p, miR-199a-5p, let-7g, miR-306b-3p, miR-1, miR-3064-5p, miR-127-5p, let-7f-5p, novel\_96, miR-543-5p, miR-200a-3p, miR-664-3p, miR-125a-3p, miR-2285af, miR-205-5p, miR-376b-3p, let-7c-5p, miR-30c-2-3p, miR-3071-3p, miR-758-5p, miR-2285ad, miR-18b-5p, let-7d, miR-411-3p, miR-10a-5p, miR-1343-5p, miR-29d-3p, miR-93, miR-133a-3p, miR-138-5p, miR-486b-3p, miR-592, miR-28-5p, miR-126b-3p, miR-99b-3p, miR-2332, miR-29b-3p, novel\_63, miR-135a-5p, miR-26c, miR-331-3p, miR-769, miR-300-3p, miR-199a-5p, miR-141-3p, miR-99a-3p, miR-329a, novel\_91, miR-20b-5p, miR-18a, miR-17-5p, miR-93-5p, miR-432-3p, miR-2285r, miR-432-3p, miR-452-5p, miR-1343-5p, miR-377-3p, miR-194a, novel\_51, miR-17-5p, miR-106a-5p, let-7g-5p, miR-134-3p, miR-185-5p, miR-2355-3p, miR-20b, miR-138, miR-29b, miR-26a-2-3p, miR-2113, miR-19b-2-5p, miR-873a-5p, miR-194-5p, miR-22-3p, miR-24-3p, miR-199b-5p, novel\_27, miR-342-3p, miR-495-3p, novel\_101, miR-29c-3p, miR-3957-3p, miR-206, miR-29a, miR-379-3p, miR-142b, miR-20a-5p, miR-208a-3p, let-7i, miR-670-3p, miR-29a-3p, miR-323a-5p, miR-216b-3p, miR-10a-5p, miR-3120-3p, miR-412-3p, miR-135b-5p, let-7e-5p, miR-9851-3p, miR-18b, miR-376b-5p, miR-376b-3p, miR-29b-1-5p, miR-664b-3p, miR-486-3p, miR-216c-5p, miR-345-3p, miR-20a, miR-760-3p, miR-98-5p, miR-99a-3p, miR-106a, miR-21-3p, let-7k, miR-221-5p, miR-208b-3p, miR-210-5p, miR-324-3p, miR-500a-5p, miR-487a-3p, miR-7859, miR-95-3p, miR-106a, miR-548e-3p, miR-3960, miR-485-3p, miR-1b-3p, miR-33b-3p, miR-378d, miR-664-5p, miR-133a-3p, miR-362-3p, miR-2300b-3p, miR-1961, miR-1193, miR-1197-5p, miR-2904, miR-206-3p, miR-346, miR-769-5p, miR-6525, miR-10b-5p, miR-338-3p, miR-3184-5p, let-7b-5p, miR-4510, miR-539-5p, let-7b, miR-214, miR-3074-2-3p, miR-664a, miR-708-5p, let-7f, miR-664a-5p, miR-324-

MOCS1 ENSOARGOC molybden

TXLNA ENSOARGOC taxilin

miR-122-3p, miR-151a-3p, miR-134-3p, miR-147a, miR-3431, miR-432-5p, miR-496-5p, miR-2459, miR-9788-3p, miR-149-5p, miR-7b-5p, miR-329-3p, miR-432, miR-708-3p, miR-194-5p, miR-1260b, miR-362-3p, miR-744-5p, miR-432-3p, miR-432-3p, miR-1306-5p, novel\_103, miR-431-5p, miR-7-5p, miR-342, miR-194a, miR-362-3p, miR-3074-5p, miR-541-5p, miR-320b, miR-411b-3p, miR-3082-5p, novel\_69, miR-323a-5p, miR-378g, miR-4443, miR-652-3p, miR-18b, miR-18a-3p, miR-3970, miR-1306, miR-147-3p, miR-877-3p, miR-3059-5p, miR-342-3p, miR-194b-5p, miR-24-3p, miR-3959-3p, miR-877-3p, miR-2428, miR-423-5p, miR-576-3p, miR-133a-5p, novel\_82, miR-128-1-5p, miR-3968, miR-502b, miR-6517, miR-18a-3p, miR-431, miR-18b-5p, miR-1224-5p, miR-3600, miR-486-5p, miR-151-5p, miR-532-3p, miR-2408, miR-362-3p, miR-2300b-3p, miR-2366, miR-5703, miR-2904, miR-4286, miR-345-3p, miR-148b-5p, novel\_39, miR-486-3p, miR-2285p, miR-1260a, miR-185-3p, miR-466i-5p, miR-450a-2-3p, novel\_127, miR-574-5p, miR-3957-5p, miR-296-3p, miR-2355-5p, miR-370-3p, miR-323-5p, miR-3957, miR-154b-5p, miR-151b, miR-21a-3p, miR-18a, miR-329a, miR-18a-5p, miR-1827, miR-671-5p, miR-485-5p, miR-3074-5p, miR-665-5p, miR-2330-3p, miR-1260b, miR-6134, miR-338-3p, miR-3184-5p, miR-2433, miR-551b-3p, miR-664a-5p, miR-151-3p, miR-331-3p, miR-664a, miR-486b-3p, miR-28-5p, miR-708-5p, miR-874-5p, miR-4492, miR-2957, miR-362-3p, miR-16b, miR-106b-5p, miR-320b, miR-1306-5p, miR-146b, miR-3085-3p, novel\_124, miR-25-5p, miR-3955-3p, miR-744-3p, miR-376b, miR-106a-5p, miR-424-5p, miR-3187-3p, miR-758-3p, miR-2310, miR-30c-1-3p, miR-378d, miR-758-3p, miR-125b-2-3p, miR-6529a, miR-484, miR-329-3p, miR-378b, miR-301b-5p, miR-1388-5p, miR-378c, miR-362-3p, miR-2426, novel\_4, miR-105-1, novel\_78, miR-2300a-5p, miR-548w, miR-1343-3p, miR-455-3p, miR-425-3p, miR-1298-3p, miR-371a-5p, miR-2285y, miR-301a-5p, miR-218-5p, miR-2285t, miR-3968, miR-2285f, miR-2447, miR-212-3p, miR-423-5p, miR-1285-5p, miR-877-3p, miR-1983, miR-877-3p, miR-299b-5p, miR-136-5p, miR-504, miR-499b-5p, miR-3064-5p, miR-139-5p, miR-4792, miR-452-3p, miR-2319b, miR-378e, miR-216a-5p, miR-500a-5p, miR-185-3p, miR-92a-1-5p, miR-422a, miR-345-3p, miR-30b-3p, miR-21-3p, miR-299-3p, miR-320d, miR-106a, miR-20a, miR-345-3p, miR-329a-5p, miR-216c-5p, miR-183-5p, miR-2285w, miR-146a-5p, miR-2432, miR-664b-3p, miR-377-5p, miR-2904, miR-1193, miR-378a-3p, miR-378i, novel\_133, miR-2300b-3p, miR-362-3p, miR-193b-5p, miR-493-3p, miR-4429, miR-18a-3p, miR-106a, miR-2284h-5p, miR-15a-5p, miR-19b-1-5p, miR-3604, miR-664a-5p, miR-320e, miR-15b-3p, miR-487a-5p, miR-4492, miR-708-5p, miR-424-5p, miR-450b-3p, miR-2330-3p, miR-378c, miR-3184-3p, miR-129-2-3p, miR-3184-5p, miR-6525, miR-346, miR-27b-5p, miR-450a-1-3p, miR-625-5p, miR-186-5p, miR-133b-3p, miR-2312, miR-345-5p, miR-370-5p, miR-3065-3p, miR-552-3p, miR-296-3p, miR-30c-1-3p, miR-504-5p, miR-378a-3p, miR-204-3p, miR-15b-5p, miR-6516, miR-139-5p, miR-105-5p, miR-2331-5p, miR-106a-5p, miR-17-5p, miR-2411-3p, miR-146a, miR-124-5p, miR-378a-5p, miR-363-5p, miR-345-5p, miR-654-3p, miR-450c-3p, miR-19b-2-5p, miR-497-5p, miR-7862, miR-16b, miR-29b, miR-26b-3p, miR-377-5p, miR-31-5p, miR-194-3p, miR-20b, miR-2355-

SRRM2 ENSOARGO( serine/a

NLRP12 ENSOARGO(NLR fami



miR-149-5p, novel\_116, miR-1285, miR-708-3p, miR-873a-5p, miR-3432b, miR-1260b, miR-16b, miR-138, miR-29b, miR-2889, miR-497-5p, miR-6240, miR-380-5p, miR-2285r, miR-377-3p, novel\_51, miR-365b-5p, miR-330-3p, miR-483-3p, miR-378a-5p, miR-660, miR-125a-5p, novel\_68, miR-26b-5p, novel\_69, miR-29a-3p, miR-299b-3p, miR-146b-3p, miR-6535, miR-148a-3p, miR-2285ab, miR-18a-3p, miR-150-5p, miR-1306, miR-1291, miR-195a-5p, miR-6395, let-7e-5p, miR-335-5p, miR-342-3p, miR-495-3p, miR-29c-3p, miR-211, miR-2284w, miR-28c, miR-576-3p, miR-15a, miR-502-5p, let-7i, miR-16a, miR-29a, miR-203b-5p, miR-656-5p, miR-429-3p, miR-299a-3p, miR-2411-5p, miR-483-3p, miR-322-5p, miR-9-5p, miR-214-5p, miR-2284z, miR-501-3p, miR-29d-3p, miR-582-3p, let-7d, miR-200b-3p, miR-3064-5p, miR-380-5p, miR-28b, miR-1271-3p, miR-2285b, let-7g, miR-3065-3p, miR-200c, miR-125a-3p, miR-2285af, miR-1260a, let-7c-5p, let-7f-5p, miR-200c-3p, miR-543-5p, miR-152-3p, novel\_127, miR-503-3p, miR-874-3p, miR-1271, miR-125a, miR-615-5p, miR-2355-5p, miR-370-3p, miR-133c, miR-2448-3p, miR-331-5p, miR-23b, miR-362-5p, miR-3154, miR-137-3p, miR-329a, miR-485-5p, miR-1248, miR-7144-5p, miR-181a-2-3p, miR-16-5p, miR-1197-3p, miR-1260b, miR-500b-5p, miR-2903, miR-365a-5p, miR-29b-3p, miR-551b-3p, miR-331-3p, miR-125b-5p, miR-331-5p, miR-138-5p, miR-204-5p, miR-486b-3p, miR-1343-3p, miR-330-3p, miR-2300a-5p, miR-548w, miR-126a-5p, miR-500-5p, miR-455-3p, miR-541, miR-329-3p, miR-484, miR-296-5p, miR-501-3p, miR-2426, miR-362-3p, miR-2284aa, miR-424-5p, let-7a-5p, miR-744-3p, miR-23a-3p, miR-8485, miR-1306-5p, novel\_103, miR-342, miR-16b, miR-362-3p, miR-3085-3p, let-7e, miR-3064-5p, miR-139-5p, miR-7977, miR-211-5p, miR-126b-5p, miR-3082-5p, miR-25, miR-500-3p, let-7d-5p, miR-361-3p, miR-504, miR-335-

KDM4A

ENSOARGO( lysine

miR-3064-5p, miR-2284f, miR-148b-5p, miR-2284y, miR-200a, miR-29a-5p, miR-450c-5p, miR-2285b, miR-192-3p, miR-205-5p, miR-664-3p, miR-127-5p, novel\_127, miR-200a-3p, miR-2285ad, miR-429-3p, miR-6517, miR-1224-5p, miR-505-5p, miR-129-1-3p, miR-1290, miR-1343-5p, miR-1260b, miR-1197-3p, miR-125b-5p, miR-125a, miR-1271, miR-331-5p, miR-223-5p, miR-345-5p, miR-329b, miR-628-5p, let-7f-2-3p, let-7f-2-3p, miR-432-3p, miR-2284l, miR-296-3p, miR-146a, miR-105-5p, novel\_51, miR-2411-3p, miR-483-3p, miR-193a-3p, miR-3955-5p, miR-134-3p, miR-149-5p, miR-197-3p, novel\_23, miR-27b-3p, miR-335-5p, miR-193b-3p, miR-758-5p, miR-199b-5p, miR-142b, miR-2284o, miR-6119-3p, miR-379-3p, miR-6123, miR-3074-5p, miR-329-5p, miR-3120-3p, miR-677, miR-320c, miR-181b-3p, miR-216a-3p, miR-3065-5p, miR-146b-5p, miR-329a-5p, miR-503-5p, miR-376a-5p, miR-181b-1-3p, miR-2424, miR-210-5p, miR-500a-5p, miR-324-3p, miR-345-3p, miR-92a-1-5p, miR-2484, miR-18a-3p, miR-380-5p, miR-2284h-5p, miR-217-5p, miR-33b-3p, miR-2284u, miR-361-5p, miR-3074-5p, miR-3184-3p, miR-129-2-3p, miR-6525, miR-769-5p, miR-346, miR-224-5p, miR-15b-3p, miR-2285j, miR-665, novel\_74, miR-487b-5p, miR-4492, miR-504-5p, miR-2331-3p, miR-548o-3p, miR-216b-3p, miR-552-3p, miR-296-3p, miR-499b-3p, miR-433-3p, miR-345-5p, miR-1895, miR-1827, miR-1388-3p, miR-2284b, miR-2310, miR-505, miR-29b-1-5p, miR-153-3p, miR-146b, miR-199b-5p, novel\_78, miR-181b-2-3p, miR-153, miR-455-3p, miR-1185-3p, miR-421, miR-2459, miR-1298-5p, miR-301b-5p, miR-1388-5p, miR-101c, miR-2447, let-7i-3p, miR-361-3p, miR-301a-5p, miR-3968, miR-490-5p, miR-2284g, miR-24-1-5p, miR-499a-3p, miR-378g, miR-3596, miR-203-3p, miR-1185-2-3p, miR-140-5p, miR-221, miR-378j, miR-299b-5p, miR-504, miR-3529-3p, miR-29b-2-5p, miR-181a-2-3p, miR-24-2-5p, miR-199a-5p, miR-3065-3p, miR-190-3p, miR-2284a, miR-1260a, miR-200c, miR-217, miR-

|        |                     |                                                                                                                                                                                                                                                                                                                                                                                                                                                                                                                                                                                                                                                                                                                                                                                                                                                                                                                                                                                                                                                                                                                                                                                                                                                                                                                                                                                                                                                                                                                                                                                                                                                                                                                                                                                                                                                                            |
|--------|---------------------|----------------------------------------------------------------------------------------------------------------------------------------------------------------------------------------------------------------------------------------------------------------------------------------------------------------------------------------------------------------------------------------------------------------------------------------------------------------------------------------------------------------------------------------------------------------------------------------------------------------------------------------------------------------------------------------------------------------------------------------------------------------------------------------------------------------------------------------------------------------------------------------------------------------------------------------------------------------------------------------------------------------------------------------------------------------------------------------------------------------------------------------------------------------------------------------------------------------------------------------------------------------------------------------------------------------------------------------------------------------------------------------------------------------------------------------------------------------------------------------------------------------------------------------------------------------------------------------------------------------------------------------------------------------------------------------------------------------------------------------------------------------------------------------------------------------------------------------------------------------------------|
|        |                     | miR-2285c, miR-345-5p, miR-1827, miR-625-5p, miR-885-3p, miR-504-5p, miR-2331-3p, miR-30c-1-3p, miR-296-3p, novel_107, miR-154a-3p, miR-301a-3p, miR-377-3p, let-7i-5p, miR-15b-3p, let-7f, miR-665, miR-151-3p, miR-130b-5p, miR-454-3p, miR-4492, miR-129-2-3p, let-7b, novel_44, miR-769-5p, miR-122-5p, miR-1961, miR-2366, novel_73, miR-361-5p, miR-34a-5p, miR-133a-3p, miR-7859, miR-92a-1-5p, miR-324-3p, miR-98-5p, let-7k, miR-487a, miR-376a-5p, miR-143-3p, miR-486-3p, miR-221, miR-378j, miR-504, miR-4792, miR-7689-3p, miR-2483-3p, miR-3596, miR-615, miR-101-3p, miR-3968, miR-154-3p, miR-1843a-3p, miR-3956-3p, miR-2447, miR-758-3p, miR-1388-5p, miR-1839-5p, miR-1343-3p, miR-330-3p, novel_78, miR-153, miR-2459, miR-130b-3p, miR-153-3p, miR-8485, miR-345-5p, miR-874-3p, miR-574-5p, miR-2285aa, miR-6740-5p, miR-193a-5p, miR-1260b, miR-1197-3p, miR-1290, miR-330-5p, miR-23b-5p, miR-2427, miR-885-3p, miR-429-3p, miR-6517, miR-129-1-3p, miR-125a-3p, miR-205-5p, let-7f-5p, miR-152-3p, miR-3064-5p, miR-29a-5p, let-7g, miR-148a-3p, miR-216a-3p, miR-2284e, let-7e-5p, novel_69, miR-374c-3p, miR-669, miR-485-3p, miR-193b-3p, miR-2285m, miR-301b-3p, miR-223-3p, miR-542-3p, miR-432, miR-22-3p, miR-4508, miR-31-5p, miR-3955-5p, miR-3431, miR-194-3p, miR-296-3p, miR-377-3p, miR-105-5p, miR-365b-5p, miR-483-3p, miR-378a-5p, miR-193a-3p, miR-6240, miR-668-3p, miR-21a-3p, miR-193b-3p, miR-132-5p, miR-6516, miR-877-5p, miR-22-3p, novel_32, miR-204-3p, miR-222-3p, miR-29b-2-5p, miR-132-5p, miR-664a, miR-208b-5p, miR-145a-3p, miR-3074-2-3p, miR-425-5p, miR-6134, let-7b-5p, miR-5703, miR-188-3p, miR-140-3p, miR-378d, miR-548e-3p, miR-485-3p, miR-200b, miR-148b-3p, miR-487a-3p, miR-383-5p, miR-532-3p, novel_83, miR-542-5p, miR-185-3p, miR-466i-5p, miR-21-3p, miR-34b-5p, miR-2411, miR-361-3p, miR-147- |
| PTPRM  | ENSOARGO (protein)  |                                                                                                                                                                                                                                                                                                                                                                                                                                                                                                                                                                                                                                                                                                                                                                                                                                                                                                                                                                                                                                                                                                                                                                                                                                                                                                                                                                                                                                                                                                                                                                                                                                                                                                                                                                                                                                                                            |
| PRPF4B | ENSOARGO (pre-mRNA) | miR-371a-5p, miR-495-3p, miR-329b<br>let-7e, miR-196b-5p, miR-330-3p, miR-2957, miR-106b-5p, miR-16b, miR-182-5p, miR-17-5p, miR-106a-5p, miR-7-5p, miR-758-3p, miR-432-3p, miR-363-5p, miR-628-5p, let-7a-5p, miR-124a, miR-424-5p, miR-6240, miR-106a-5p, miR-497-5p, miR-16b, miR-101a-5p, miR-758-3p, miR-145a-5p, miR-2113, miR-7b-5p, miR-541, miR-9788-3p, miR-2459, miR-20b, let-7g-5p, miR-185-5p, miR-145b, miR-330-3p, miR-490-5p, miR-4726-5p, miR-16a, let-7i, miR-15a, miR-20a-5p, miR-8095, miR-758-5p, miR-541-3p, miR-195a-5p, novel_94, miR-135b-5p, let-7e-5p, miR-450b-3p, miR-668-5p, miR-2387, let-7d-5p, miR-499a-3p, miR-541-5p, miR-24-1-5p, miR-452-3p, let-7k, miR-106a, miR-2898, miR-98-5p, let-7f-5p, miR-6536, let-7c-5p, miR-2285af, miR-205-5p, let-7g, miR-490-3p, miR-24-2-5p, miR-20a, miR-361-5p, miR-142-3p, let-7d, miR-124-3p, miR-196a-5p, miR-1246, miR-1961, miR-2408, miR-322-5p, miR-7859, miR-15a-5p, miR-380-5p, miR-548e-3p, miR-106a, miR-424-5p, miR-100-3p, miR-135a-5p, let-7f, let-7b-5p, miR-6134, miR-93, miR-16-5p, let-7b, miR-3184-3p, miR-20b-5p, miR-3074-1-3p, miR-93-5p, miR-17-5p, miR-15b-5p, let-7i-5p, miR-499b-3p, miR-216b-5p, miR-2285aa, miR-182-5p, miR-548o-3p                                                                                                                                                                                                                                                                                                                                                                                                                                                                                                                                                                                                                                     |
| CDCA7  | ENSOARGO (cell div) |                                                                                                                                                                                                                                                                                                                                                                                                                                                                                                                                                                                                                                                                                                                                                                                                                                                                                                                                                                                                                                                                                                                                                                                                                                                                                                                                                                                                                                                                                                                                                                                                                                                                                                                                                                                                                                                                            |

|        |                   |                                                                                                                                                                                                                                                                                                                                                                                                                                                                                                                                                                                                                                                                                                                                                                                                                                                                                                                                                                                                                                                                                                                                                                                                                                                                                                                                                                                                            |
|--------|-------------------|------------------------------------------------------------------------------------------------------------------------------------------------------------------------------------------------------------------------------------------------------------------------------------------------------------------------------------------------------------------------------------------------------------------------------------------------------------------------------------------------------------------------------------------------------------------------------------------------------------------------------------------------------------------------------------------------------------------------------------------------------------------------------------------------------------------------------------------------------------------------------------------------------------------------------------------------------------------------------------------------------------------------------------------------------------------------------------------------------------------------------------------------------------------------------------------------------------------------------------------------------------------------------------------------------------------------------------------------------------------------------------------------------------|
| HNRNPD | ENSOARGO(heteroge | miR-6525, miR-10b-5p, novel_82, miR-339a, miR-450a-2-3p, miR-107, miR-103a-3p, miR-10a-5p, novel_79, miR-339-5p, miR-10a, miR-103, miR-10b, miR-7134-5p, miR-107, miR-339b, miR-10a-5p                                                                                                                                                                                                                                                                                                                                                                                                                                                                                                                                                                                                                                                                                                                                                                                                                                                                                                                                                                                                                                                                                                                                                                                                                     |
| LRRC31 | ENSOARGO(leucine  | miR-190a-3p, miR-412-3p, miR-30f, miR-129b-3p, miR-320e, miR-2432, miR-411b-3p, miR-412<br>miR-3065-5p, miR-6516-3p, miR-195a-5p, miR-379-5p, miR-2319a, miR-136-5p, miR-7-1-3p, miR-3120-3p, miR-2319b, miR-500-3p, miR-454-5p, miR-203-3p, miR-320c, miR-670-3p, miR-16a, miR-6402, miR-15a, miR-502b, miR-6123, miR-421-5p, miR-206, miR-9-5p, novel_101, miR-452-5p, novel_27, miR-502-3p, miR-371b-3p, miR-758-3p, miR-501-3p, miR-450c-3p, miR-1a-3p, miR-7857, miR-101c, miR-497-5p, miR-450b-5p, miR-16b, miR-409b, miR-16b, miR-197-5p, miR-105-5p, let-7d-3p, miR-320b, miR-214-3p, miR-452-5p, miR-487b-5p, miR-424-5p, miR-130b-5p, miR-503-3p, miR-758-3p, miR-8485, miR-433-3p, miR-320a, miR-503-3p, miR-450a-1-3p, miR-488-3p, miR-21a-3p, miR-1827, miR-7144-5p, miR-543-3p, miR-767, miR-874-3p, miR-503-3p, miR-574-5p, miR-15b-5p, miR-6130, miR-6516, miR-665, miR-6740-5p, miR-34c-3p, miR-130b-5p, miR-134-5p, miR-424-5p, miR-767-5p, miR-450b-3p, miR-214, miR-6128, miR-16-5p, miR-4510, miR-122-5p, miR-206-3p, miR-6525, miR-323-3p, miR-501-3p, miR-23b-5p, miR-5703, miR-2366, miR-3578, miR-134, miR-4429, novel_73, miR-493-3p, miR-1224-5p, miR-6517, miR-134-5p, novel_83, miR-2284z, miR-582-3p, miR-450a-1-3p, miR-545-5p, miR-15a-5p, miR-2411-5p, miR-6516-5p, miR-322-5p, miR-9-5p, miR-1277-5p, miR-450a-2-3p, miR-320d, miR-1, miR-2385-3p, miR-1271-3p, miR-2411 |
| IDH3A  | ENSOARGO(isocitra |                                                                                                                                                                                                                                                                                                                                                                                                                                                                                                                                                                                                                                                                                                                                                                                                                                                                                                                                                                                                                                                                                                                                                                                                                                                                                                                                                                                                            |
| PLXNB1 | ENSOARGO(plexin B | miR-4508, miR-4532, miR-4492, miR-3653-3p, novel_94, miR-3957-3p, miR-185-3p                                                                                                                                                                                                                                                                                                                                                                                                                                                                                                                                                                                                                                                                                                                                                                                                                                                                                                                                                                                                                                                                                                                                                                                                                                                                                                                               |

miR-146b-5p, miR-195a-5p, let-7e-5p, miR-107, miR-19a-3p, miR-2387, miR-3120-3p, novel\_68, miR-16a, let-7i, miR-15a, miR-28c, miR-211, miR-24-3p, miR-17-3p, novel\_101, miR-2285x, miR-342-3p, miR-1a-1-5p, miR-497-5p, miR-26a-2-3p, miR-30b-3p, miR-16b, miR-1260b, miR-653, miR-181a-5p, miR-103, miR-134-3p, let-7g-5p, miR-339-5p, miR-103a-3p, miR-466f-3p, miR-330-3p, miR-2411-3p, miR-146a, miR-377-3p, let-7a-2-3p, miR-654-3p, miR-130b-5p, miR-6240, miR-3074-1-3p, miR-7144-5p, miR-671-5p, miR-1248, miR-485-5p, miR-1814c, miR-10b-3p, let-7g-3p, miR-3154, miR-223-5p, miR-2285aa, miR-141-3p, miR-874-3p, miR-204-5p, miR-28-5p, miR-6740-5p, miR-331-3p, miR-1-5p, miR-1260b, miR-16-5p, let-7a-2-3p, let-7d, miR-2427, miR-345-3p, miR-129-1-3p, miR-322-5p, miR-302a-5p, miR-2411-5p, novel\_79, miR-2285ad, miR-107, miR-200a-3p, miR-450a-2-3p, miR-17-3p, miR-127-5p, miR-1a-2-5p, miR-181b-5p, let-7f-5p, miR-339a, let-7c-5p, miR-2285af, miR-1260a, let-7g, miR-200a, miR-2285b, miR-28b, miR-544-5p, miR-96-5p, let-7d-5p, miR-378g, miR-2285u, miR-7689-3p, miR-211-5p, miR-452-3p, miR-2284q, miR-371a-5p, miR-1973, miR-2285y, miR-107-5p, miR-2285n, miR-2440, miR-361-3p, let-7i-3p, miR-452-5p, miR-181d-5p, miR-212-3p, miR-1839-5p, miR-3120-5p, miR-30b-3p, miR-125b-2-3p, miR-9788-3p, miR-2300a-5p, miR-330-3p, miR-146b, miR-214-3p, let-7e, miR-2285o, miR-103a-2-5p, miR-16b, miR-342, miR-8485, miR-2310, let-7a-5p, miR-424-5p, miR-494-3p, novel\_99, let-7g-3p, miR-339b, miR-877-5p, miR-15b-5p, let-7i-5p, miR-377-3p, miR-2284s, miR-216b-3p, miR-2331-3p, miR-1277-3p, miR-548o-3p, miR-424-5p, miR-708-5p, miR-130b-5p, miR-664a, miR-17-3p, let-7f, let-7b-5p, miR-6134, miR-181c-5p, miR-6525, novel\_44, miR-1271, miR-214, miR-3074-2-3p, let-7b, miR-433-5p, miR-129-2-3p, miR-361-5p, miR-19b-3p, miR-1961, novel\_83, miR-2284b-5p, miR-616-3p, miR-15a-

let-7f-5p, miR-200a-3p, novel\_96, novel\_127, miR-125a-3p, miR-200a, let-7g, miR-2285b, miR-3064-5p, miR-155-5p, miR-1343-5p, miR-330-5p, miR-505-5p, miR-450a-1-3p, miR-486-5p, miR-2285ad, miR-6517, miR-412, miR-1224-5p, miR-592, miR-125b-5p, miR-1260b, novel\_42, miR-193a-5p, miR-345-5p, miR-200a-5p, miR-23b, miR-2355-5p, miR-542-5p, miR-125a, miR-106b-3p, miR-193a-3p, miR-146a, miR-3141, miR-365b-5p, novel\_51, miR-6240, miR-493-5p, miR-628-5p, miR-26a-2-3p, miR-27b-3p, miR-432, miR-1843b-5p, miR-542-3p, miR-223-3p, miR-450c-3p, miR-197-3p, miR-22-3p, miR-412-5p, miR-134-3p, miR-194-3p, miR-149-5p, miR-31-5p, miR-29a, miR-4324, miR-1247-3p, miR-193b-3p, miR-29c-3p, miR-410-5p, miR-412-3p, miR-146b-5p, miR-2319a, let-7e-5p, miR-3141, miR-1306, miR-3970, miR-150-5p, miR-216a-3p, miR-3065-5p, novel\_69, miR-374c-3p, miR-6535, miR-677, miR-181b-3p, miR-329-5p, miR-202-5p, miR-98-5p, let-7k, novel\_17, miR-618, miR-210-5p, miR-92a-1-5p, miR-376a-5p, miR-181b-1-3p, miR-486-3p, miR-329a-5p, miR-345-3p, miR-133a-3p, miR-218-1-3p, miR-34a-5p, miR-1961, miR-217-5p, miR-23b-3p, miR-7859, miR-23c, miR-18a-3p, novel\_74, miR-129-5p, miR-4492, miR-874-5p, let-7f, miR-665, miR-769-5p, miR-224-5p, miR-3184-5p, let-7b, miR-3958-5p, miR-665-5p, miR-214, miR-345-5p, miR-1827, miR-186-5p, miR-450a-1-3p, miR-129b-3p, miR-2284s, let-7i-5p, miR-2331-3p, miR-504-5p, miR-548o-3p, miR-552-3p, miR-296-3p, miR-491-5p, miR-146b, miR-214-3p, miR-1388-3p, miR-23a-3p, miR-744-3p, miR-2284r, miR-301b-5p, miR-541, miR-501-3p, miR-455-3p, miR-330-3p, miR-181b-2-3p, miR-499a-5p, miR-2440, miR-301a-5p, miR-361-3p, novel\_111, miR-423-5p, miR-3956-3p, miR-504, miR-493-5p, miR-1983, miR-140-5p, miR-378g, miR-25, miR-500-3p, miR-543-5p, miR-1260a, let-7c-5p, miR-217, miR-3065-3p, miR-1957a, miR-190-3p, miR-29b-2-5p, miR-2285-3p, miR-329a, miR-3074-1-3p, miR-671-5p, miR-30c-1-3p, miR-574-5p, miR-377-3p, miR-544-3p, miR-193b-3p, miR-133c, miR-204-3p, miR-15b-5p, miR-2433, miR-144, miR-665, miR-664a, miR-424-5p, miR-374b, miR-3184-3p, miR-1271, miR-16-5p, miR-346, miR-3184-5p, miR-362-3p, miR-2300b-3p, miR-217-5p, miR-200b-3p, miR-218-1-3p, miR-3960, miR-299a-3p, miR-429-3p, miR-3600, miR-322-5p, miR-15a-5p, miR-1271-5p, miR-200b, miR-545-5p, miR-200c, miR-374a-5p, miR-3071-3p, miR-30c-2-3p, miR-217, miR-200c-3p, miR-760-3p, miR-299-3p, miR-329a-5p, miR-369-3p, miR-29b-1-5p, miR-148b-5p, miR-2285i, miR-143-3p, miR-381-3p, miR-96-5p, miR-2285k, miR-195a-5p, miR-20a-3p, miR-320b, miR-374b-5p, miR-299b-3p, miR-144-3p, miR-27a-3p, miR-15a, miR-6402, miR-16a, miR-490-5p, miR-342-3p, miR-2447, miR-212-3p, miR-193b-3p, miR-2285x, miR-423-5p, miR-2428, miR-329-3p, miR-143-5p, miR-362-3p, miR-16b, miR-544a, miR-101a-5p, miR-497-5p, miR-27b-3p, novel\_78, miR-1343-3p, miR-330-3p, miR-5010-3p, miR-27a-3p, miR-544b, miR-342, miR-377-3p, miR-330-3p, miR-29b-1-5p, miR-362-3p, miR-16b, miR-193a-3p, miR-6240, miR-424-5p, miR-101b-3p, miR-494-3p, let-7f-2-3p, let-7f-2-3p, miR-30c-1-3p, miR-8485, miR-193a

miR-200b, miR-124-3p, miR-2300b-3p, miR-1961, miR-215-5p, miR-30c-5p, novel\_133, miR-218-1-3p, novel\_73, miR-487a, miR-143-3p, miR-345-3p, miR-26a-5p, miR-30b, let-7k, miR-30d, miR-98-5p, miR-154a-3p, let-7i-5p, miR-204-3p, miR-192-5p, miR-487b-5p, miR-30d-5p, miR-186-5p, miR-339b, miR-30f, miR-345-5p, miR-154b-3p, miR-665-5p, miR-3074-5p, miR-145a-3p, let-7b, let-7b-5p, miR-224-5p, miR-6525, miR-665, let-7f, miR-130b-5p, miR-4492, miR-487b-5p, miR-145b, miR-9788-3p, miR-376b-3p, miR-758-3p, miR-412-3p, miR-484, miR-3120-5p, miR-2426, miR-33a-5p, miR-2330-5p, let-7a-5p, miR-124a, miR-2310, miR-758-3p, miR-326, let-7e, miR-1185-5p, miR-499b-5p, miR-2319b, miR-20a-3p, miR-10b, miR-664b, let-7d-5p, miR-144-5p, miR-3082-5p, miR-2447, miR-3059-5p, miR-7705, miR-877-3p, miR-2285y, miR-30b-5p, miR-154-3p, miR-2285t, miR-412, novel\_79, miR-429-3p, novel\_121, miR-330-5p, miR-23b-5p, miR-30a-5p, miR-218-2-3p, miR-3591-5p, miR-345-3p, miR-196a-5p, miR-200b-3p, miR-30c, let-7d, let-7g, miR-339a, let-7c-5p, miR-664-3p, miR-200c, miR-376b-3p, miR-200c-3p, let-7f-5p, miR-215-5p, miR-487a-3p, miR-30e-5p, miR-345-5p, miR-144-5p, miR-193a-5p, miR-331-3p, miR-494-5p, miR-2332, miR-31-3p, miR-339-5p, miR-31-5p, miR-194-3p, let-7g-5p, miR-145a-5p, miR-542-3p, miR-2113, miR-1843b-5p, miR-130b-5p, miR-345-5p, miR-654-3p, miR-2411-3p, miR-224-5p, miR-196b-5p, miR-26b-5p, miR-3074-5p, miR-216b-3p, let-7e-5p, miR-7975, miR-450b-3p, miR-2284w, miR-326-3p, let-7i

miR-66b, miR-450b-3p, miR-17-3p, miR-664a, miR-487a-5p, miR-424-5p, miR-129-2-3p, miR-10b-5p, miR-6525, miR-346, miR-206-3p, miR-450a-1-3p, miR-2312, novel\_99, miR-186-5p, miR-660-5p, miR-21-3p, miR-296-3p, miR-377-3p, miR-10a, miR-193b-3p, miR-15b-5p, miR-210-5p, miR-92a-1-5p, miR-466i-5p, miR-299-3p, miR-216c-5p, miR-146a-5p, miR-2366, miR-362-3p, miR-2904, miR-5703, miR-1434-5p, miR-140-3p, miR-33b-3p, miR-16-1-3p, miR-378d, miR-18a-3p, miR-15a-5p, miR-148b-3p, miR-107-5p, miR-3968, miR-335, miR-450a-5p, miR-490-5p, miR-2285t, miR-885-5p, miR-541-3p, miR-2285f, miR-452-5p, miR-219a-5p, miR-199b-5p, miR-136-5p, miR-2319b, miR-3082-5p, miR-1306-5p, miR-362-3p, miR-16b, miR-491-5p, miR-146b, miR-199b-5p, miR-103a-2-5p, miR-424-5p, miR-33a-5p, miR-376b, miR-2284r, miR-484, miR-329-3p, miR-541, miR-10b, miR-1a-3p, miR-30b-3p, miR-362-3p, miR-1388-5p, miR-101a-5p, miR-2284aa, miR-101c, miR-3120-5p, novel\_4, miR-409b, miR-548w, miR-539-5p, miR-455-3p, miR-5100, miR-331-3p, miR-409-3p, miR-592, miR-16-5p, miR-137-3p, miR-10b-3p, miR-329a, miR-7144-5p, miR-671-5p, miR-300-3p, miR-374c-3p, miR-199a-5p, miR-17-3p, miR-6536, novel\_127, miR-543-5p, novel\_96, miR-152-3p, miR-2385-3p, miR-1, miR-4286, miR-199a-5p, miR-200a, miR-1957a, miR-450c-5p, miR-490-3p, miR-218-2-3p, miR-582-3p, miR-10a-5p, miR-299a-3p, miR-505-5p, miR-322-5p, miR-450a-1-3p, miR-2284z, miR-129-1-3p, miR-15a, miR-576-3p, miR-485-3p, miR-16a, miR-206, miR-147-5p, miR-219b-3p, miR-335-5p, miR-193b-3p, miR-17-3p, miR-199b-5p, miR-2285ab, miR-148a-3p, miR-150-5p, miR-1306, miR-3591-3p, miR-18a-3p, miR-146b-5p, miR-2319a, miR-195a-5p, miR-10a-5p, miR-374c-3p, miR-299b-3p, miR-377-3p, miR-146a, miR-455-5p, miR-660, miR-193a-3p, miR-432-3p, miR-542-3p, miR-450c-3p, novel\_23, miR-3071-5p, miR-374b-3p, miR-30b-3p, miR-16b, miR-16-1-3p, miR-107-5p, miR-155-novel\_115, miR-2411-3p, miR-323b-3p, miR-29b-1-5p, miR-124-5p, miR-33a-5p, miR-432-3p, miR-432-3p, miR-6529a, miR-3071-5p, miR-30b-3p, miR-323b, miR-30b-3p, miR-138, miR-134-3p, miR-147a, miR-455-3p, miR-9788-3p, miR-216a-3p, miR-4324, novel\_1, miR-335, miR-3958-3p, miR-147-5p, miR-203b-5p, miR-3956-3p, miR-335-5p, novel\_60, miR-2447, miR-17-3p, miR-3065-5p, miR-504, miR-505-3p, miR-452-3p, miR-378g, miR-345-3p, miR-127-5p, miR-17-3p, miR-200a-3p, miR-376c-3p, miR-29b-1-5p, miR-664b-3p, miR-2285b, miR-2366, miR-345-3p, miR-5703, novel\_73, miR-505-3p, miR-1b-3p, miR-340-5p, miR-758-5p, miR-320e, miR-665, miR-3969, miR-6740-5p, miR-17-3p, miR-138-5p, miR-1306-5p, miR-539-5p, miR-425-5p, miR-6128, miR-6525, miR-323-3p, miR-488-3p, miR-3154, miR-27b-5p, miR-504-5p, miR-545-3p, miR-141-3p, miR-2285aa, miR-376e-3p, miR-376c-3p, miR-204-3p



miR-497-5p, miR-1260b, miR-29b, miR-16b, miR-30b-3p, miR-30b-3p, miR-7b-5p, miR-147a, miR-377-5p, novel\_4, miR-2300a-5p, miR-125a-5p, miR-16b, miR-2285v, miR-1306-5p, miR-7-5p, miR-4532, miR-432-3p, miR-424-5p, miR-195a-5p, miR-450b-3p, miR-3970, miR-1306, miR-361-3p, novel\_69, miR-29a-3p, miR-29a, miR-2284o, miR-16a, miR-615, miR-15a, miR-423-5p, miR-29c-3p, miR-3957-3p, miR-2447, miR-188-3p, miR-29d-3p, novel\_133, miR-615-3p, miR-532-3p, miR-15a-5p, miR-322-5p, miR-505-5p, miR-383-5p, miR-200a-3p, miR-30b-3p, miR-466i-5p, miR-2898, miR-125b, miR-92a-1-5p, miR-185-3p, miR-324-3p, miR-1260a, miR-3065-3p, miR-377-5p, miR-2284f, miR-485-5p, miR-671-5p, miR-1248, miR-23a-5p, miR-15b-5p, miR-204-3p, miR-296-3p, miR-141-3p, miR-552-3p, miR-125a, miR-2355-5p, miR-3065-3p, miR-28-5p, miR-708-5p, miR-874-5p, miR-424-5p, miR-664a, miR-665, miR-331-3p, miR-29d-5p, miR-125b-5p, miR-29b-3p, miR-6134, miR-3184-5p, miR-29c-5p, miR-1260b, miR-665-5p, miR-16-5p, miR-6128, miR-3184-3p, miR-539-5p, miR-222-5p, miR-148b-3p, miR-200b, miR-23b-3p, miR-1247-5p, miR-616-3p, miR-1b-3p, miR-3600, miR-33b-3p, miR-34a-5p, miR-2284u, miR-133a-3p, miR-193b-5p, novel\_133, miR-5703, miR-125b-2-3p, miR-664b-3p, miR-376a-5p, miR-143-3p, miR-2424, miR-369-3p, miR-466i-5p, miR-30b-3p, miR-34b-5p, miR-185-3p, miR-92a-1-5p, miR-216a-5p, miR-193b-3p, miR-6130, miR-499b-3p, miR-6516, miR-27a-5p, miR-877-5p, miR-204-3p, miR-30c-1-3p, miR-296-3p, miR-182-5p, miR-3065-3p, miR-345-5p, miR-18a-5p, novel\_99, miR-625-5p, miR-21a-3p, miR-433-3p, miR-129b-3p, miR-142a-5p, miR-6134, miR-3184-5p, miR-3184-3p, miR-129-2-3p, miR-3074-5p, miR-4510, miR-539-5p, miR-425-5p, miR-17-3p, miR-664a, miR-130b-5p, miR-708-5p, miR-190a-5p, miR-2285j, miR-665, miR-539-5p, miR-142-5p, miR-1298-3p, miR-147a, miR-425-3p, miR-9788-3p, novel\_78, miR-2300a-5p, miR-145b, miR-27a-3p, miR-450b-5p, miR-2426, miR-544a, miR-4791, miR-143-5p, miR-484, miR-7857, miR-323b, miR-501-3p, miR-412-3p, miR-30c-1-3p, miR-8485, miR-494-3p, miR-1388-3p, miR-33a-5p, miR-2284b, miR-23a-3p, miR-3085-3p, miR-103a-2-5p, miR-1306-5p, miR-182-5p, miR-505, miR-323b-3p, miR-3082-5p, miR-489, miR-3596, miR-499a-3p, miR-500-3p, miR-27a-3p, miR-20a-3p, miR-452-3p, miR-664b, miR-2284g, miR-3064-5p, miR-499b-5p, miR-541-5p, miR-1983, novel\_94, miR-335-3p, miR-361-3p, miR-129b-5p, miR-378j, novel\_111, miR-361-3p, miR-423-5p, miR-1285-5p, miR-502-3p, miR-2447, miR-190b-5p, miR-181d-5p, miR-2440, novel\_82, miR-218-5p, miR-107-5p, miR-6516-5p, miR-129-1-3p, novel\_121, miR-545-5p, miR-429-3p, miR-18b-5p, miR-412, miR-200b-3p, miR-3578, miR-501-3p, miR-23b-5p, miR-2427, miR-29d-3p, miR-148b-5p, miR-28b, miR-2478, miR-2285b, miR-2284a, miR-1957a, miR-200a, miR-376c-5p, miR-3065-3p, miR-376b-5p, miR-2284y, miR-2403, miR-3064-5p, miR-181b-5p, miR-200c-3p, miR-17-3p, miR-152-3p, miR-

ATP6V0B ENSOARGO( ATPase, )

SCN3B ENSOARGO( sodium c

miR-301a-5p, miR-769-5p, miR-2285n, miR-2285t, miR-335, miR-499a-5p, miR-628-3p, miR-2284j, miR-541-3p, miR-212-3p, miR-885-5p, miR-3059-5p, miR-140-5p, miR-493-5p, miR-136-5p, miR-211-5p, miR-2284g, miR-2483-3p, miR-106b-5p, miR-505, miR-29b-1-5p, miR-326, novel\_103, miR-342, miR-153-3p, miR-130b-3p, miR-487b-5p, miR-2284b, miR-23a-3p, miR-106a-5p, miR-1388-3p, miR-2310, miR-1b-5p, miR-8485, miR-1a-3p, miR-7857, miR-301b-5p, miR-10b, miR-541, miR-6529a, miR-2284aa, miR-544a, miR-145b, novel\_78, miR-421, miR-148b-5p, miR-153, miR-338-5p, miR-664a-5p, miR-324-3p, miR-2285j, miR-454-3p, miR-155-5p, miR-425-5p, miR-145a-3p, miR-3184-3p, miR-338-3p, miR-206-3p, miR-769-5p, miR-10b-5p, miR-27b-5p, miR-21a-3p, miR-186-5p, novel\_99, let-7g-3p, miR-660-5p, miR-221-5p, miR-155-5p, miR-193b-3p, miR-377-3p, miR-10a, miR-301a-3p, miR-27a-5p, miR-345-3p, miR-500a-5p, novel\_17, miR-221-5p, miR-1277-5p, miR-760-3p, miR-106a, miR-195a-3p, miR-20a, miR-487a, miR-216c-5p, miR-143-3p, miR-125b-2-3p, miR-29b-1-5p, miR-376a-5p, miR-188-3p, miR-1197-5p, miR-191, novel\_133, miR-148a-5p, miR-378d, miR-2284u, miR-218-1-3p, miR-505-3p, miR-3600, miR-106a, miR-23c, miR-23b-3p, miR-487a-3p, novel\_87, miR-6402, miR-20a-5p, miR-6123, miR-206, miR-2285x, miR-495-3p, miR-193b-3p, miR-335-5p, miR-342-3p, miR-301b-3p, miR-326-3p, miR-3959-3p, miR-323c, miR-371b-3p, miR-211, miR-3065-5p, miR-505-3p, miR-10a-5p, miR-3120-3p, miR-411b-3p, miR-17-5p, novel\_51, miR-106a-5p, miR-455-5p, miR-2411-3p, miR-377-3p, miR-193a-3p, miR-660, miR-483-3p, miR-668-3p, miR-493-5p, miR-380-5p, let-7j, miR-539-3p, miR-145a-5p, miR-432, miR-455-5p, miR-380-3p, miR-2284ab, miR-130a-3p, miR-133b-5p, miR-20b, miR-544b, novel\_116, miR-3431, miR-432-5p, miR-2284d, miR-135a-1-3p, miR-34c-3p, miR-2284k, miR-191-5p, miR-204-5p, miR-2284v, miR-1306-5p, miR-93, miR-

miR-2285aa, miR-2355-5p, miR-125a, miR-1271, miR-574-5p, miR-874-3p, miR-25-3p, miR-1248, miR-876-3p, miR-2318, miR-329a, miR-345-5p, miR-16-5p, miR-1260b, miR-1197-3p, miR-125b-5p, miR-2433, miR-412, novel\_79, miR-18b-5p, miR-299a-3p, miR-2285ad, miR-6517, novel\_121, miR-129-1-3p, miR-505-5p, miR-322-5p, miR-885-3p, miR-3064-5p, miR-29a-5p, novel\_39, miR-92b-3p, miR-148b-5p, miR-3071-3p, miR-205-5p, miR-125a-3p, novel\_127, miR-152-3p, miR-3074-5p, miR-677, miR-181b-3p, miR-299b-3p, miR-1306, miR-148a-3p, miR-410-5p, miR-412-3p, miR-1839-3p, miR-193b-3p, miR-758-5p, miR-2284w, miR-485-3p, miR-28c, miR-6119-3p, miR-339-5p, miR-103a-3p, miR-3431, miR-134-3p, miR-197-3p, miR-22-3p, miR-432, miR-2113, miR-223-3p, miR-542-3p, miR-497-5p, miR-369-5p, miR-105-5p, miR-32, novel\_51, miR-2411-3p, miR-377-3p, miR-296-3p, miR-193a-3p, miR-216b-3p, miR-296-3p, miR-2331-3p, miR-32-5p, miR-15b-5p, miR-377-3p, miR-499b-3p, miR-129b-3p, miR-625-5p, miR-885-3p, miR-1895, miR-1827, miR-345-5p, miR-339b, miR-3958-5p, miR-214, miR-129-2-3p, miR-3074-5p, miR-3184-5p, miR-122-5p, miR-6525, miR-346, miR-665, let-7b-3p, miR-874-5p, miR-4492, miR-380-5p, miR-212-5p, miR-18a-3p, miR-1247-5p, miR-193b-5p, miR-664-5p, miR-133a-3p, miR-34a-5p, miR-503-5p, miR-486-3p, miR-664b-3p, miR-181b-1-3p, miR-500a-5p, miR-345-3p, miR-210-5p, novel\_17, miR-3653-3p, miR-4792, miR-24-1-5p, miR-378g, miR-499a-3p, miR-2483-3p, miR-381-3p, miR-1983, miR-96-5p, miR-136-5p, miR-2447, miR-363-3p, miR-423-5p, miR-877-3p, miR-361-3p, miR-301a-5p, miR-218-5p, miR-1843a-3p, miR-181b-2-3p, miR-1343-3p, miR-147a, miR-323b, miR-2284r, miR-329-3p, miR-301b-5p, miR-362-3p, miR-574-3p, miR-8485, miR-323b-3p, miR-199a-3p, miR-214-3p, miR-34c-5p, miR-18a, miR-362-5p, miR-3154, miR-381-3p, miR-23a-5p, miR-6128, miR-1306-5p, miR-500b-5p, miR-331-3p, miR-409-3p, miR-

miR-214, miR-665-5p, miR-433-5p, miR-652b, miR-10b-5p, novel\_44, miR-324-3p, miR-19b-1-5p, miR-151-3p, miR-29b-2-5p, miR-4492, miR-874-5p, miR-129-5p, novel\_74, miR-451a, miR-664a, miR-370-5p, miR-3065-3p, miR-2331-3p, miR-140-5p, miR-30c-1-3p, miR-221-5p, miR-548o-3p, miR-204-3p, novel\_25, miR-22-3p, miR-10a, miR-487b-5p, miR-543-3p, miR-625-5p, miR-1895, miR-186-5p, novel\_99, miR-18a-5p, miR-345-5p, miR-195a-3p, miR-2424, miR-181b-1-3p, miR-219b-5p, miR-185-3p, miR-125b, miR-221-5p, miR-21-3p, miR-202-5p, miR-466i-5p, miR-380-5p, miR-212-5p, miR-199a-3p, miR-2904, miR-1197-5p, miR-140-3p, novel\_133, miR-2408, miR-361-5p, miR-493-3p, miR-6527, let-7i-3p, miR-9-5p, miR-452-5p, miR-3059-5p, miR-2447, miR-541-3p, miR-877-3p, novel\_111, miR-107-5p, miR-218-5p, miR-2285t, miR-4726-5p, miR-3958-3p, miR-499b-5p, miR-7977, miR-3064-5p, miR-452-3p, miR-20a-3p, miR-2319b, miR-203-3p, miR-376d, miR-7857-3p, miR-378g, miR-489, miR-378j, miR-361-3p, miR-140-5p, miR-376a-3p, miR-544-5p, novel\_94, miR-877-3p, miR-33a-5p, miR-744-3p, miR-574-3p, miR-2330-5p, miR-4532, miR-193a, miR-30c-1-3p, miR-2957, miR-199a-3p, miR-342, miR-431-5p, miR-326, miR-1306-5p, miR-2285o, miR-214-3p, miR-103a-2-5p, miR-491-5p, miR-3085-3p, miR-3955-3p, miR-5010-3p, miR-181b-2-3p, miR-199b-3p, miR-151a-3p, miR-1298-3p, miR-376b-3p, miR-2284r, miR-6529a, miR-484, miR-10b, miR-541, miR-1388-5p, miR-101a-5p, novel\_42, miR-145-3p, miR-1260b, miR-331-3p, miR-125b-5p, miR-100-3p, miR-6740-5p, miR-135a-5p, miR-370-5p, miR-494-5p, miR-5100, miR-2355-5p, miR-370-3p, miR-125a, miR-1271, miR-141-3p, miR-874-3p, miR-365a-3p, miR-137-3p, miR-18a, miR-488-3p, miR-424-3p, miR-7144-5p, miR-671-5p, miR-2474, miR-345-5p, novel\_91, miR-3064-5p, miR-29b-2-5p, miR-4286, miR-181a-2-3p, miR-3065-3p, miR-200a, miR-190-3p, miR-28b, miR-30c-2-3p, miR-376b-3p, miR-

miR-101c, miR-1839-5p, miR-544a, miR-125b-2-3p, miR-541, miR-421, miR-216a-3p, miR-5010-3p, miR-29b-1-5p, miR-320b, miR-2284b, miR-494-3p, miR-2330-5p, miR-101b-3p, miR-1388-3p, novel\_94, miR-3963, miR-4443, miR-144-5p, miR-452-3p, miR-139-5p, miR-2284g, miR-335, miR-628-3p, miR-3958-3p, miR-101-3p, miR-615, novel\_82, miR-181d-5p, miR-541-3p, miR-2284u, miR-361-5p, miR-148a-5p, miR-133a-3p, miR-33b-3p, miR-4429, miR-184-3p, miR-140-3p, miR-328-3p, miR-532-3p, miR-505-3p, miR-18a-3p, miR-760-3p, miR-320d, miR-92a-1-5p, novel\_17, miR-486-3p, miR-125b-2-3p, miR-377-5p, miR-29b-1-5p, miR-421-5p, miR-345-3p, miR-582-5p, miR-543-3p, miR-345-5p, miR-27b-5p, miR-22-3p, miR-139-5p, miR-377-3p, miR-544-3p, miR-582-5p, miR-296-3p, miR-2331-3p, miR-140-5p, miR-708-5p, miR-129-5p, miR-1468-5p, novel\_74, miR-665, miR-3604, miR-320e, miR-181c-5p, miR-224-5p, miR-145a-3p, miR-7862, miR-29b, miR-22-3p, miR-197-3p, miR-542-3p, miR-1843b-5p, miR-181a-5p, miR-2113, miR-2355-3p, miR-194-3p, miR-412-5p, miR-377-5p, miR-378a-5p, miR-483-3p, miR-196b-5p, miR-377-3p, miR-224-5p, miR-345-5p, miR-503-3p, miR-2285r, miR-6395, miR-505-3p, miR-2319a, miR-450b-3p, miR-216a-3p, miR-18a-3p, miR-3970, miR-181b-3p, miR-320c, miR-677, miR-670-3p, miR-29a-3p, miR-7-1-3p, miR-6123, miR-147-5p, miR-421-5p, miR-22-5p, miR-29a, miR-33a-3p, miR-28c, miR-495-3p, novel\_101, miR-29c-3p, miR-335-5p, miR-128-3p, miR-23b-5p, miR-29d-3p, miR-196a-5p, miR-615-3p, miR-582-3p, miR-483-3p, miR-24-2-5p, miR-7641, novel\_127, miR-181b-5p, miR-1271-3p, miR-2284a, miR-2284y, miR-2478, miR-28b, miR-345-5p, miR-876-3p, miR-3154, miR-320a, miR-137-3p, miR-324-5p, miR-28-5p, miR-486b-3p, miR-29b-3p, miR-2433, miR-144-5p

ERLIN2 ENSOARGO(ER lipid 5p, miR-219a-2-3p, miR-21-3p, miR-214-3p, miR-494-3p, miR-219-3p, miR-214, miR-219b-3p

TGDS ENSOARGO(TDP-gluc, miR-2284k, miR-2332, miR-338-5p, novel\_74, miR-374b, miR-539-5p, miR-2284v, miR-129-2-3p, miR-6128, miR-193a-5p, miR-1197-3p, miR-206-3p, miR-10b-3p, miR-876-3p, miR-154b-3p, miR-7144-5p, novel\_99, miR-1248, miR-140-5p, miR-487a-3p, miR-548o-3p, miR-2284n, miR-2285af, miR-200c, miR-500a-5p, miR-185-3p, miR-2284m, miR-200c-3p, novel\_127, miR-299-3p, miR-487a, miR-1, miR-195a-3p, miR-130a-5p, miR-2424, miR-140-3p, novel\_73, miR-200b-3p, miR-299a-3p, miR-18a-3p, miR-429-3p, miR-1224-5p, miR-30d-3p, miR-487a-3p, miR-222-5p, miR-200b, miR-483-3p, miR-129-1-3p, miR-133a-5p, miR-206, miR-154-3p, miR-212-3p, miR-2284j, miR-452-5p, miR-150-5p, miR-18a-3p, miR-450b-3p, miR-374b-5p, miR-299b-3p, miR-1185-2-3p, miR-323b-3p, miR-483-3p, let-7f-2-3p, let-7f-2-3p, miR-654-3p, miR-539-3p, miR-873a-5p, miR-1a-3p, miR-323b, miR-2284ab, miR-2284x, miR-3955-5p, miR-5010-3p, miR-222-5p, miR-2284d, miR-1185-3p

TRAV17 ENSOARGO(T cell r

miR-20b, miR-221-3p, miR-503-5p, miR-26b-3p, miR-339-5p, miR-330-3p, novel\_78, miR-29b, miR-125b-2-3p, miR-412-3p, miR-323b, miR-2113, miR-1843b-5p, miR-143-5p, miR-301b-5p, let-7a-2-3p, miR-8485, miR-30c-1-3p, miR-6240, miR-199b-5p, miR-106b-5p, miR-106a-5p, miR-17-5p, miR-330-3p, miR-505, miR-503-5p, miR-4443, miR-29a-3p, miR-3082-5p, miR-25, miR-329-5p, miR-664b, miR-378b, miR-199b-5p, miR-221, miR-148a-3p, miR-7705, miR-199b-5p, miR-1285-5p, novel\_27, miR-29c-3p, miR-495-3p, miR-6527, miR-147-5p, miR-374a-3p, miR-22-5p, miR-29a, miR-301a-5p, miR-33a-3p, miR-382-5p, miR-20a-5p, novel\_83, miR-148b-3p, novel\_79, miR-412, miR-6517, miR-222, miR-361-5p, miR-378d, let-7a-2-3p, miR-188-3p, miR-29d-3p, miR-3591-5p, miR-1271-3p, miR-200a, miR-199a-5p, miR-2432, miR-148b-5p, miR-20a, miR-503-5p, miR-329a-5p, miR-21-3p, miR-200a-3p, miR-152-3p, miR-30b-3p, miR-339a, miR-30c-2-3p, miR-664-3p, miR-2397-5p, novel\_32, miR-199a-5p, miR-3965, miR-3956, miR-141-3p, miR-2355-5p, miR-30c-1-3p, miR-20b-5p, miR-339b, let-7g-3p, miR-329b, miR-17-5p, miR-93-5p, miR-338-3p, miR-374a-3p, miR-93, miR-539-5p, miR-374b-3p, miR-29b-3p, miR-370-3p, miR-324-5p, miR-199a-5p, miR-34c-5p, miR-3154, miR-488-3p, miR-671-5p, miR-10b-3p, miR-1306-5p, miR-378c, miR-10b-3p, miR-409-3p, miR-1306-3p, miR-370-5p, miR-486b-3p, miR-28-5p, miR-7641, miR-222, miR-378h, miR-483-3p, miR-6516-5p, miR-345-3p, miR-134, miR-10a-5p, miR-582-3p, miR-495-5p, miR-1, miR-30a-3p, miR-2403, miR-181a-2-3p, miR-3065-3p, miR-199a-5p, miR-28b, miR-24-2-5p, miR-1260a, miR-2898, miR-450a-2-3p, miR-10a-5p, miR-146b-3p, miR-34b, miR-2285ab, miR-2387, miR-9851-3p, miR-6395, miR-195a-5p, miR-1291, miR-450b-3p, miR-19a-3p, miR-1193, miR-342-3p, miR-326-3p, miR-449a, miR-24-3p, miR-16a, miR-34c, miR-502-5p, miR-15a, miR-6529b, miR-22-5p, miR-502b, novel\_1, miR-26b-3p, miR-377-5p, miR-133b-5p, miR-544b, miR-2355-3p, miR-432-5p, miR-145a-5p, miR-1285, miR-6239, miR-7862, miR-30b-3p, miR-219a-1-3p, miR-1260b, miR-101-5p, miR-363-5p, miR-330-3p, miR-452-5p, miR-125a-5p, miR-3065-3p, miR-370-5p, miR-378a-3p, miR-221-5p, miR-204-3p, novel\_25, miR-27a-5p, miR-6516, miR-193b-3p, miR-21a-3p, miR-2312, miR-2330-3p, miR-378c, miR-145a-3p, miR-6134, miR-338-3p, miR-10b-5p, miR-206-3p, miR-222-3p, miR-424-5p, miR-708-5p, miR-208b-5p, miR-450b-3p, miR-3600, miR-3960, miR-532-3p, miR-148b-3p, miR-15a-5p, miR-188-3p, miR-1197-5p, miR-5703, novel\_133, miR-378d, miR-19b-3p, miR-29b-1-5p, miR-130a-5p, miR-125b, miR-185-3p, miR-34b-5p, miR-221-5p, miR-30b-3p, miR-760-3p, miR-7977, miR-3064-5p, miR-10b, miR-7857-3p, miR-378e, miR-489, miR-3082-5p, miR-361-3p, miR-199b-5p, novel\_94, miR-2285f, miR-452-5p, miR-541-3p, miR-2285y, miR-107-5p, miR-4726-5p, miR-335, novel\_4, miR-2300a-5p, miR-221-3p, miR-9788-3p, miR-216a-3p, miR-412-3p, miR-30b-3p, miR-378b, miR-484, miR-296-5p, miR-10b, miR-143-5p, miR-378c, miR-101a-5p, miR-2126, miR-544a, miR-652-5p, miR-199a-3p, miR-2330, miR-582-5p, miR-190a-5p, miR-466i-5p, miR-101a-5p, miR-3604, miR-190a, miR-26a-5p, miR-582-5p, miR-450b-5p, miR-26b-5p, miR-190b-5p, miR-101-5p

CSPP1

ENSOARGO(centroso)

miR-493-5p, miR-668-5p, miR-96-5p, miR-361-3p, miR-27a-3p, miR-1185-2-3p, miR-203-3p, miR-499a-3p, miR-211-5p, miR-541-5p, miR-20a-3p, miR-3064-5p, miR-2284q, miR-335, miR-218-5p, miR-8095, miR-362-5p, miR-101c, miR-1185-3p, miR-500-5p, miR-27a-3p, miR-181b-2-3p, miR-2300a-5p, miR-3085-3p, miR-16b, miR-199a-3p, miR-193a, miR-3187-3p, miR-4532, miR-8485, miR-23a-3p, miR-424-5p, miR-124a, miR-1388-3p, miR-1827, miR-129b-3p, let-7f-1-3p, miR-21a-3p, miR-877-5p, miR-15b-5p, miR-499b-3p, miR-370-5p, miR-424-5p, miR-874-5p, novel\_74, miR-665, let-7b-3p, miR-98-3p, miR-1271, let-7a-3p, miR-218-1-3p, miR-19b-3p, miR-140-3p, miR-217-5p, miR-98-3p, miR-124-3p, miR-328-3p, miR-199a-3p, miR-2284h-5p, miR-222-5p, miR-15a-5p, miR-340-5p, miR-23c, miR-23b-3p, miR-18a-3p, miR-21-3p, miR-466i-5p, miR-181b-1-3p, miR-2285w, miR-6395, miR-195a-5p, miR-135b-5p, miR-19a-3p, miR-1291, miR-18a-3p, miR-216a-3p, miR-181b-3p, miR-677, miR-2404, miR-421-5p, miR-382-5p, miR-16a, miR-133a-5p, miR-576-3p, miR-15a, miR-502-5p, novel\_27, miR-211, miR-1193, miR-335-5p, miR-27b-3p, miR-497-5p, miR-219a-1-3p, miR-16b, miR-197-3p, miR-2113, miR-1434-3p, miR-412-5p, miR-2285g, miR-3955-5p, let-7a-2-3p, miR-503-3p, miR-2285r, miR-493-5p, novel\_48, let-7g-3p, miR-362-5p, miR-23b, miR-200a-5p, miR-615-5p, miR-3068-3p, miR-204-5p, miR-135a-5p, miR-370-5p, miR-34c-3p, miR-500b-5p, miR-16-5p, let-7a-2-3p, miR-128-3p, miR-214-5p, miR-758-5p, miR-1271-5p, miR-322-5p, miR-6517, novel\_127, miR-181c-3p, miR-217, miR-125a-3p, miR-1957a, miR-3064-5p, miR-2385-3p

miR-621-3p, miR-2100-3p, miR-6080-3p, miR-610-3p, miR-2000-3p, miR-618, miR-195a-3p, miR-2285w, miR-2424, miR-181b-1-3p, miR-98-3p, miR-217-5p, miR-193b-5p, miR-2366, miR-361-5p, miR-142-3p, miR-380-5p, miR-212-5p, miR-2284h-5p, miR-874-5p, miR-129-5p, miR-130b-5p, miR-3074-5p, miR-98-3p, miR-224-5p, miR-129b-3p, miR-433-3p, miR-543-3p, miR-186-5p, miR-1827, miR-345-5p, miR-30c-1-3p, miR-32-5p, miR-582-5p, miR-323b-3p, miR-505, miR-182-5p, miR-491-5p, miR-124a, miR-323b, miR-758-3p, miR-2284r, miR-1839-5p, miR-181b-2-3p, miR-1343-3p, miR-455-3p, miR-2459, miR-1298-3p, miR-539-5p, novel\_82, miR-3964, miR-628-3p, miR-499a-5p, miR-190b-5p, miR-363-3p, miR-3956-3p, miR-885-5p, miR-877-3p, miR-361-3p, miR-378j, miR-493-5p, miR-96-5p, miR-2285u, miR-2319b, miR-144-5p, miR-203-3p, miR-378g, miR-3071-3p, miR-205-5p, novel\_96, miR-152-3p, miR-28-3p, miR-3064-5p, miR-29a-5p, miR-92b-3p, miR-1343-5p, miR-330-5p, miR-23b-5p, miR-3591-5p, miR-1290, miR-412, miR-1224-5p, miR-2285ad, miR-429-3p, miR-6517, novel\_9, miR-144-5p, miR-28a-3p, miR-1260b, miR-301, miR-345-5p, miR-329b, miR-874-3p, miR-223-5p, miR-25-3p, miR-365b-5p, miR-32, miR-2411-3p, miR-483-3p, miR-628-5p, miR-380-5p, miR-493-5p, miR-503-3p, miR-2285r, miR-26a-2-3p, miR-3955-5p, miR-31-5p, miR-103a-3p, miR-149-5p, miR-194-3p, miR-3535, miR-134-3p, miR-485-3p, miR-576-3p, miR-208a-3p, miR-142b, miR-758-5p, miR-3970, miR-150-5p, miR-216a-3p, miR-376b-5p, miR-148a-3p, miR-2319a, miR-3120-3p, novel\_68, miR-3074-5p, miR-677, miR-181b-3p, novel\_69, miR-221-5p, miR-30b-3p, miR-760-3p, miR-2411, miR-2432, miR-125b-2-3p, miR-124-3p, miR-1197-5p, miR-5703, miR-2300b-3p, let-7a-3p, miR-3600, miR-148b-3p, miR-324-3p, miR-320e, miR-208b-5p, miR-1271, miR-539-5p, miR-21a-3p, let-7f-1-3p, novel\_99, miR-582-5p, miR-2312, let-7g-3p, miR-370-5p, miR-

KLF17

ENSOARGO(Kruppel-



miR-6240, miR-654-3p, miR-330-3p, miR-2411-3p, miR-31-5p, miR-133b-5p, let-7g-5p, miR-3431, miR-194-3p, miR-181a-5p, miR-145a-5p, miR-138, novel\_101, miR-326-3p, miR-142b, let-7i, miR-147-5p, miR-6123, miR-10a-5p, miR-26b-5p, miR-3120-3p, miR-2404, miR-411b-3p, miR-320c, miR-144-3p, miR-3591-3p, let-7e-5p, miR-181a-2-3p, miR-2478, miR-200a, let-7g, miR-3065-3p, miR-30c-2-3p, let-7c-5p, let-7f-5p, miR-127-5p, miR-181b-5p, miR-543-5p, miR-505-5p, miR-758-5p, miR-345-3p, miR-330-5p, let-7d, miR-10a-5p, miR-496, miR-145-3p, miR-144, miR-138-5p, miR-487a-3p, miR-503-3p, miR-2285aa, miR-615-5p, miR-300-3p, miR-320a, miR-10b-3p, miR-1814c, let-7a-5p, miR-101b-3p, miR-30c-1-3p, miR-2310, miR-320b, miR-326, miR-323b-3p, miR-25-5p, let-7e, novel\_4, miR-409b, miR-330-3p, miR-2300a-5p, miR-145b, miR-142-5p, miR-455-3p, miR-421, miR-143-5p, miR-10b, miR-323b, miR-450b-5p, miR-16-2-3p, miR-212-3p, miR-452-5p, miR-181d-5p, miR-10b, miR-2319b, miR-2285u, miR-489, let-7d-5p, miR-487a, miR-195a-3p, miR-2432, miR-26a-5p, miR-219b-5p, miR-345-3p, miR-185-3p, miR-320d, miR-98-5p, miR-30b-3p, let-7k, miR-548e-3p, miR-3600, miR-7859, miR-383-5p, miR-1961, miR-2904, miR-5703, miR-1193, miR-4429, let-7b, miR-4510, miR-6525, miR-142a-5p, miR-10b-5p, let-7b-5p, miR-181c-5p, miR-6134, miR-2285j, miR-15b-3p, let-7f, miR-665, miR-3604, miR-6516-3p, miR-4492, miR-129-5p, miR-30c-1-3p, miR-496-3p, miR-548o-3p, miR-154a-3p, miR-3065-3p, miR-21-3p, miR-10a, miR-6130, let-7i-5p, miR-433-3p, miR-154b-3p

ZNF410 ENSOARGO(zinc fin. miR-29a-5p, miR-2310, miR-6240, miR-34b-5p, miR-103a-2-5p, miR-124-5p, miR-487b-5p, miR-330-3p, miR-134-5p, miR-330-3p, miR-34a-5p, miR-21-5p, novel\_73, miR-134, miR-3184-5p, miR-449a, miR-423-5p, miR-1296-5p, miR-4510, miR-134-5p, miR-592, novel\_1, miR-487b-5p, miR-34c, miR-107-5p, miR-2440, miR-34c-5p, miR-6130, miR-34b, miR-365a-3p, miR-598-3p, miR-1827, miR-1814c, miR-598-3p, miR-21c

GLUD1 ENSOARGO(Ovis ari.

miR-3120-3p, miR-26b-5p, miR-216b-3p, miR-144-3p, miR-411b-3p, miR-378f, miR-146b-5p, miR-335-5p, miR-2284w, miR-28c, miR-142b, miR-339-5p, miR-487b-3p, miR-103a-3p, miR-31-5p, miR-134-3p, miR-22-3p, miR-7b-5p, miR-19b-2-5p, miR-497-5p, miR-16-1-3p, miR-16b, miR-628-5p, let-7f-2-3p, let-7f-2-3p, miR-493-5p, miR-380-5p, let-7j, miR-2285r, novel\_51, miR-194a, miR-2411-3p, miR-105-5p, miR-377-3p, miR-146a, miR-7-5p, miR-125a, miR-2285aa, miR-874-3p, miR-503-3p, miR-223-5p, miR-300-3p, miR-93-5p, miR-30e-5p, miR-1248, miR-20b-5p, miR-329a, miR-345-5p, miR-767, miR-16-5p, miR-1260b, miR-125b-5p, miR-6740-5p, novel\_63, miR-2433, miR-134-5p, miR-592, novel\_9, miR-18b-5p, novel\_79, miR-6517, novel\_121, miR-450a-1-3p, miR-134-5p, miR-322-5p, miR-330-5p, miR-1343-5p, miR-450b-5p, miR-148b-5p, miR-8117, miR-664-3p, miR-125a-3p, miR-205-5p, novel\_127, miR-126b-5p, miR-374b-5p, miR-7689-3p, miR-1185-2-3p, miR-4443, miR-203-3p, miR-499a-3p, miR-3596, miR-378g, miR-544-5p, miR-376a-3p, miR-493-5p, miR-668-5p, miR-299b-5p, miR-7705, miR-877-3p, miR-615, miR-3968, miR-628-3p, miR-145b, novel\_78, miR-199b-3p, miR-1185-3p, miR-421, miR-126a-5p, miR-148b-5p, miR-1298-3p, miR-376b-3p, miR-329-3p, miR-1839-5p, miR-1388-5p, miR-362-3p, miR-744-3p, miR-101b-3p, miR-127-3p, miR-2310, miR-8485, miR-378d, miR-106b-5p, miR-16b, miR-182-5p, miR-505, miR-199a-3p, miR-146b, miR-552-3p, miR-30c-1-3p, miR-15b-5p, miR-499b-3p, miR-10a, miR-377-3p, miR-30d-5p, miR-299, miR-186-5p, miR-543-3p, miR-345-5p, miR-339b, miR-433-5p, miR-122-5p, novel\_44, miR-665, miR-106a, miR-18a-3p, miR-7859, miR-378a-3p, miR-217-5p, miR-2366, miR-378i, miR-148a-5p, miR-16-1-3p, miR-218-1-3p, novel\_73, miR-33b-3p, miR-2424, miR-422a, miR-345-3p, miR-324-3p, miR-500a-5p, miR-26a-5p, miR-618, miR-210-5p, miR-2484, miR-3653-3p, miR-10a-5p, miR-7-1-3p, miR-320b, miR-376b-

miR-548w, miR-153, miR-376b-3p, miR-147a, miR-421, miR-541, miR-323b, miR-758-3p, miR-101c, miR-1839-5p, miR-124a, miR-1388-3p, miR-127-3p, miR-744-3p, miR-378d, miR-8485, miR-199a-3p, miR-323b-3p, miR-182-5p, miR-491-5p, miR-487b-5p, miR-153-3p, miR-139-5p, miR-4792, miR-211-5p, miR-3596, miR-378g, miR-203-3p, miR-140-5p, miR-381-3p, miR-378j, miR-668-5p, miR-376a-3p, miR-9-3p, miR-2447, miR-3956-3p, miR-877-3p, novel\_111, miR-18a-3p, miR-380-5p, miR-7859, miR-1247-5p, miR-378i, miR-378a-3p, miR-493-3p, miR-664-5p, miR-16-1-3p, miR-218-1-3p, miR-34a-5p, miR-142a-3p, miR-486-3p, miR-143-3p, miR-210-5p, novel\_17, miR-324-3p, miR-345-3p, miR-422a, miR-2484, miR-10a, miR-433-3p, miR-339b, miR-345-5p, miR-543-3p, miR-1827, miR-186-5p, miR-3958-5p, miR-6525, miR-15b-3p, miR-3604, miR-665, miR-874-5p, miR-4492, miR-130b-5p, miR-3955-5p, miR-31-5p, miR-339-5p, miR-3431, miR-134-3p, miR-149-5p, miR-194-3p, miR-411-5p, miR-19b-2-5p, novel\_23, miR-16-1-3p, miR-2285r, miR-296-3p, novel\_51, miR-2411-3p, miR-194a, miR-3120-3p, miR-150-5p, miR-1306, miR-216a-3p, miR-3065-5p, miR-410-5p, miR-378f, miR-758-5p, miR-4324, miR-142b, miR-625-3p, miR-429-3p, novel\_79, miR-1224-5p, miR-2284z, miR-486-5p, novel\_121, miR-1290, novel\_39, miR-30f, novel\_127, novel\_96, miR-874-3p, miR-2285aa, miR-125a, miR-3959-5p, miR-345-5p, miR-28a-3p, miR-2284k, miR-125b-5p, miR-142-3p, miR-216a-3p, miR-484, miR-378b, miR-296-5p, miR-10b, miR-378c, miR-544a, miR-2284aa, miR-3120-5p, let-7c-3p, miR-33a-5p, miR-758-3p, miR-1306-5p, miR-3955-3p, miR-10b, miR-20a-3p, miR-499b-5p, miR-378e, miR-7857-3p, miR-454-5p, miR-376d, novel\_94, novel\_60, miR-541-3p, miR-194b-5p, miR-548e-3p, miR-222-5p, miR-200b, miR-616-3p, novel\_83, miR-199a-3p, miR-532-3p, miR-290A, miR-124-3p, miR-188-3p, miR-

miR-125b-5p, miR-3969, miR-1-5p, miR-6128, miR-365a-5p, miR-1197-3p, miR-200a-5p, miR-137-3p, miR-503-3p, miR-190a-3p, miR-329a, miR-2285aa, miR-370-3p, miR-141-3p, miR-125a, miR-3068-3p, miR-376c-3p, miR-34c-5p, miR-30f, miR-3071-3p, miR-376b-3p, miR-219-3p, miR-200a-3p, miR-1a-2-5p, miR-2285b, miR-192-3p, miR-2284a, miR-196a-5p, miR-3578, miR-128-3p, miR-10a-5p, miR-7641, miR-582-3p, novel\_121, miR-486-5p, miR-34c, miR-147-5p, novel\_1, novel\_101, miR-1a-1-5p, miR-449a, miR-3959-3p, miR-3591-3p, miR-376b-3p, miR-216a-3p, miR-378b, miR-2285ab, miR-410-5p, miR-412-3p, miR-10a-5p, miR-3120-3p, miR-7-1-3p, miR-34b, miR-330-3p, miR-365b-5p, miR-7-5p, miR-125a-5p, miR-452-5p, miR-660, miR-378a-5p, miR-196b-5p, miR-2483-5p, miR-382, miR-628-5p, miR-493-5p, miR-6240, miR-654-3p, miR-22841, miR-197-3p, novel\_23, miR-432, miR-873a-5p, miR-19b-2-5p, miR-708-3p, miR-223-3p, miR-7b-5p, miR-1434-3p, miR-188-5p, miR-30b-3p, miR-16-1-3p, miR-133b-5p, miR-6238, miR-432-5p, miR-19b-1-5p, miR-219b-3p, miR-214, miR-539-5p, miR-3184-3p, miR-6134, miR-10b-5p, miR-129b-3p, miR-299, miR-543-3p, miR-186-5p, miR-2312, let-7g-3p, miR-21-3p, miR-140-5p, miR-221-5p, miR-660-5p, miR-877-5p, miR-376e-3p, miR-582-5p, miR-10a, miR-2284s, miR-139-5p, miR-125b, miR-221-5p, miR-34b-5p, miR-21-3p, miR-216c-5p, miR-2424, miR-143-3p, miR-664b-3p, miR-376c-3p, miR-130a-5p, miR-1246, miR-376a-5p, miR-362-3p, miR-2300b-3p, miR-148a-5p, miR-34a-5p, miR-212-5p, miR-548e-3p, novel\_83, miR-7859, miR-2285n, miR-2440, miR-101-3p, miR-2285f, miR-219a-2-3p, miR-7705, miR-381-3p, miR-409-5p, miR-376a-3p, miR-493-5p, miR-1983, miR-299b-5p, miR-147-3p, miR-136-5p, miR-2285u, miR-139-5p, miR-10b, miR-452-3p, miR-203-3p, miR-376d, miR-362-3p, novel\_103, miR-214-3p, miR-2284b, miR-652-5p, miR-193a, miR-8485, miR-2187-3p, miR-30b-3p, miR-229-3p, miR-4532, miR-193b-3p, miR-193b-3p, miR-126b-3p, miR-193a-3p, miR-25-5p, novel\_19, miR-3141, miR-3141, miR-5126

FAM161B ENSOARGO(family w 7b-5p, miR-1434-3p, miR-188-5p, miR-30b-3p, miR-16-1-3p, miR-133b-5p, miR-6238, miR-432-5p, miR-19b-1-5p, miR-219b-3p, miR-214, miR-539-5p, miR-3184-3p, miR-6134, miR-10b-5p, miR-129b-3p, miR-299, miR-543-3p, miR-186-5p, miR-2312, let-7g-3p, miR-21-3p, miR-140-5p, miR-221-5p, miR-660-5p, miR-877-5p, miR-376e-3p, miR-582-5p, miR-10a, miR-2284s, miR-139-5p, miR-125b, miR-221-5p, miR-34b-5p, miR-21-3p, miR-216c-5p, miR-2424, miR-143-3p, miR-664b-3p, miR-376c-3p, miR-130a-5p, miR-1246, miR-376a-5p, miR-362-3p, miR-2300b-3p, miR-148a-5p, miR-34a-5p, miR-212-5p, miR-548e-3p, novel\_83, miR-7859, miR-2285n, miR-2440, miR-101-3p, miR-2285f, miR-219a-2-3p, miR-7705, miR-381-3p, miR-409-5p, miR-376a-3p, miR-493-5p, miR-1983, miR-299b-5p, miR-147-3p, miR-136-5p, miR-2285u, miR-139-5p, miR-10b, miR-452-3p, miR-203-3p, miR-376d, miR-362-3p, novel\_103, miR-214-3p, miR-2284b, miR-652-5p, miR-193a, miR-8485, miR-2187-3p, miR-30b-3p, miR-229-3p, miR-4532, miR-193b-3p, miR-193b-3p, miR-126b-3p, miR-193a-3p, miR-25-5p, novel\_19, miR-3141, miR-3141, miR-5126

CALY ENSOARGO(calcyon 3p, miR-25-5p, novel\_19, miR-3141, miR-3141, miR-5126

ERI3 ENSOARGO(ERI1 exo: miR-4726-5p, miR-128-1-5p, miR-129b-3p, miR-433-3p, miR-182-5p, miR-6516, miR-6516-5p, miR-182-5p, miR-1343-3p, miR-217, miR-3613, miR-218-5p, miR-205-5p, miR-30b-3p, miR-199b-5p, miR-130b-5p, miR-130b-5p, novel\_27, miR-199a-5p, miR-199b-5p, miR-148b-5p, miR-377-5p, miR-129b-3p, miR-217-5p, miR-432, miR-199b-5p, miR-3578, miR-3613-5p, miR-1224-5p, miR-3600, miR-377-5p, miR-31-5p, miR-2331-3p, miR-20a-3p, miR-545-5p, miR-199a-5p, miR-432-5p, miR-539-5p

SERPINA7 ENSOARGO(serpin p 5p, miR-432, miR-199b-5p, miR-3578, miR-3613-5p, miR-1224-5p, miR-3600, miR-377-5p, miR-31-5p, miR-2331-3p, miR-20a-3p, miR-545-5p, miR-199a-5p, miR-432-5p, miR-539-5p

TPO ENSOARGO(thyroid novel\_19, miR-4726-5p, novel\_9, miR-2432

miR-1-5p, miR-144, miR-100-3p, miR-1197-3p, miR-1260b, miR-500b-5p, miR-378c, miR-3607-3p, miR-345-5p, miR-10b-3p, miR-3074-1-3p, miR-7144-5p, miR-503-3p, miR-362-5p, miR-3154, miR-320a, miR-223-5p, miR-503-3p, miR-574-5p, miR-615-5p, miR-1a-2-5p, miR-17-3p, miR-543-5p, miR-6119-5p, miR-205-5p, miR-2285af, miR-1260a, miR-217, miR-30c-2-3p, miR-450b-5p, miR-1271-3p, miR-2285b, miR-1957a, miR-345-3p, miR-196a-5p, miR-330-5p, miR-483-3p, miR-2411-5p, miR-758-5p, miR-378h, miR-505-5p, novel\_121, miR-412, miR-6123, miR-625-3p, miR-576-3p, miR-371b-3p, miR-326-3p, miR-1a-1-5p, miR-342-3p, miR-135a-2-3p, miR-17-3p, miR-193b-3p, miR-412-3p, miR-378f, miR-2285ab, miR-150-5p, miR-2404, miR-144-3p, miR-320c, miR-378b, miR-3120-3p, miR-124-5p, miR-196b-5p, miR-483-3p, miR-193a-3p, miR-296-3p, miR-503-5p, novel\_51, miR-455-5p, miR-2411-3p, miR-330-3p, miR-2284l, miR-432-3p, miR-432-3p, miR-345-5p, miR-296-3p, miR-6240, miR-1260b, miR-455-5p, miR-26a-2-3p, miR-542-3p, novel\_23, miR-503-5p, miR-2285g, miR-412-5p, miR-149-5p, miR-665, miR-17-3p, novel\_74, miR-487a-5p, miR-208b-5p, miR-2285j, miR-320e, miR-665, miR-346, miR-142a-5p, miR-338-3p, miR-145a-3p, miR-378c, miR-345-5p, let-7g-3p, miR-2312, novel\_99, miR-2285c, miR-129b-3p, miR-216b-5p, miR-193b-3p, novel\_32, novel\_25, miR-204-3p, miR-548o-3p, miR-30c-1-3p, miR-504-5p, miR-221-5p, miR-378a-3p, miR-296-3p, miR-216b-3p, miR-760-3p, miR-320d, miR-221-5p, miR-618, miR-210-5p, miR-422a, miR-345-3p, miR-500a-5p, miR-324-3p, miR-130a-5p, miR-2411, miR-503-5p, miR-2285w, miR-4429, miR-378d, miR-378i, miR-1197-5p, miR-217-5p, miR-378a-3p, miR-5703, miR-7859, miR-532-3p, miR-2284h-5p, miR-3600, miR-628-3p, miR-4726-5p, miR-2284q, miR-3964, miR-382-3p, miR-362-5p, miR-361-3p, miR-8095, miR-3956-3p, miR-2447, novel\_60, miR-3059-5p, miR-2285f, miR-504, miR-1983, miR-

miR-639b, miR-379-5p, miR-195a-5p, let-7e-5p, miR-1291, miR-410-5p, miR-1306, miR-320c, miR-669, miR-323a-5p, miR-216b-3p, let-7i, miR-425-5p, miR-16a, miR-28c, miR-6529b, miR-4324, miR-15a, miR-2428, miR-326-3p, miR-24-3p, novel\_101, miR-1193, miR-744-5p, miR-497-5p, miR-4508, miR-1260b, miR-16b, miR-1285, miR-873a-5p, miR-503-5p, miR-134-3p, miR-185-5p, miR-3431, let-7g-5p, miR-3955-5p, miR-1343-5p, miR-125a-5p, miR-2285l, novel\_51, miR-197-5p, miR-503-5p, let-7a-2-3p, miR-628-5p, miR-485-5p, miR-23a-5p, let-7g-3p, miR-320a, miR-324-5p, miR-615-5p, miR-125a, miR-486b-3p, miR-125b-5p, miR-100-3p, miR-370-5p, miR-2433, miR-1260b, miR-133a-3p, miR-16-5p, novel\_42, let-7a-2-3p, let-7d, miR-330-5p, miR-1343-5p, miR-218-2-3p, miR-214-5p, miR-322-5p, miR-9-5p, miR-505-5p, miR-6517, miR-423-3p, novel\_96, miR-127-5p, let-7f-5p, let-7c-5p, miR-205-5p, miR-1260a, miR-1271-3p, let-7g, miR-28b, miR-2403, miR-877-3p, miR-504, miR-147-3p, miR-361-3p, let-7d-5p, miR-3082-5p, miR-378g, miR-499a-5p, miR-3968, miR-2285n, novel\_82, miR-423-5p, miR-361-3p, miR-877-3p, miR-9-5p, miR-2447, miR-21b, miR-1839-5p, miR-1388-5p, miR-484, miR-6529a, miR-421, miR-9788-3p, miR-425-3p, miR-1343-3p, miR-151a-3p, miR-214-3p, let-7e, miR-25-5p, miR-491-5p, miR-16b, miR-1306-5p, miR-5126, miR-326, miR-320b, miR-4532, miR-652-5p, miR-127-3p, miR-424-5p, miR-574-3p, let-7a-5p, miR-1827, miR-1895, miR-133b-3p, miR-21a-3p, miR-877-5p, miR-15b-5p, miR-151b, let-7i-5p, miR-204-3p, miR-6130, miR-323-5p, miR-296-3p, miR-370-5p, miR-504-5p, miR-2331-3p, miR-424-5p, miR-665, miR-151-3p, let-7f, miR-6134, let-7b-5p, miR-3184-5p, miR-214, miR-665-5p, miR-3958-5p, miR-4510, let-7b, miR-4429, miR-1193, miR-5703, miR-2904, miR-2300b-3p, miR-1961, miR-328-3p, miR-532-3p, miR-151-5p, miR-15a-5p, miR-210-3p, let-7l, miR-21-3p, miR-30b-3p, miR-166i-5p, miR-760-3p, miR-676-3p, miR-1388-3p, miR-130b-5p, miR-127-3p, miR-2285o, miR-29b-1-5p, novel\_51, miR-320b, miR-582, miR-326, miR-2355-3p, miR-425-3p, miR-134-3p, miR-339-5p, miR-340-3p, miR-31-5p, miR-1343-3p, miR-544a, miR-22-3p, novel\_27, miR-326-3p, miR-9-3p, miR-877-3p, miR-2285f, miR-17-3p, miR-2285x, miR-1193, miR-2447, miR-320c, miR-669, miR-378g, miR-320b, miR-7977, miR-9-3p, miR-6395, miR-1291, miR-2285k, miR-378j, miR-18a-3p, miR-140-5p, miR-2285ab, miR-2424, miR-29b-1-5p, miR-2285i, miR-130a-5p, miR-2403, miR-216c-5p, novel\_127, miR-320d, miR-2898, miR-17-3p, miR-324-3p, miR-92a-1-5p, miR-339a, miR-185-3p, miR-671-3p, miR-328-3p, miR-383-5p, novel\_79, miR-18a-3p, miR-582-3p, miR-4429, miR-330-5p, miR-23b-5p, miR-3591-5p, miR-130b-5p, novel\_74, miR-664a, miR-1843b-3p, miR-17-3p, miR-331-3p, miR-320e, miR-2332, miR-370-5p, miR-204-3p, miR-22-3p, miR-544-3p, miR-370-5p, miR-542-5p, miR-296-3p, miR-2331-3p, miR-874-3p, miR-7144-5p, miR-671-5p, miR-2312, miR-339b, miR-320a

PRKCG ENSOARGO(protein

XAF1 ENSOARGO(XIAP ass

miR-770b, miR-423-5p, miR-541-3p, miR-3059-5p, miR-194b-5p, miR-335, miR-218-5p, miR-371a-5p, miR-378e, miR-452-3p, miR-664b, miR-3064-5p, miR-4792, miR-7977, miR-499b-5p, miR-378d, miR-30c-1-3p, miR-4532, miR-382-3p, miR-424-5p, miR-106a-5p, miR-1388-3p, miR-25-5p, miR-3085-3p, miR-214-3p, miR-381-5p, miR-146b, miR-326, novel\_103, miR-320b, miR-342, miR-106b-5p, miR-16b, miR-29b-1-5p, novel\_19, miR-1298-3p, miR-147a, miR-496-5p, miR-2459, miR-2285e, miR-151a-3p, miR-1343-3p, miR-222-5p, miR-2426, miR-378c, miR-21b, miR-2284aa, miR-1839-5p, miR-541, miR-6529a, miR-484, miR-378b, miR-30b-3p, novel\_44, miR-6525, miR-6134, miR-3184-5p, miR-122-5p, miR-145a-3p, miR-378c, miR-214, miR-665-5p, miR-3074-2-3p, miR-450b-3p, miR-208b-5p, miR-500, miR-874-5p, miR-708-5p, miR-424-5p, miR-4492, miR-320e, miR-151-3p, miR-193b-3p, miR-15b-5p, miR-877-

CUEDC2 ENSOARGO(CUE doma 5p, novel\_25, novel\_32, miR-378a-3p, miR-30c-1-3p, novel\_107, miR-133b-3p, miR-1827, miR-625-5p, miR-1895, miR-2285c, miR-450a-1-3p, miR-500a-3p, miR-377-5p, miR-29b-1-5p, miR-2432, miR-146a-5p, miR-345-3p, miR-195a-3p, miR-20a, miR-320d, miR-106a, miR-21-3p, miR-210-5p, miR-125b, miR-422a, miR-185-3p, miR-122-3p, miR-345-3p, miR-324-3p, miR-219b-5p, miR-500a-5p, miR-15a-5p, miR-2284h-5p, miR-1247-5p, miR-106a, miR-18a-3p, miR-212-5p, novel\_73, miR-4429, miR-16-1-3p, miR-2300b-3p, miR-378i, miR-1197-5p, miR-378a-3p, miR-2904, miR-371b-3p, miR-24-3p, miR-1307-3p, miR-2428, miR-326-3p, miR-335-5p, miR-342-3p, novel\_101, miR-193b-3p, miR-128-1-5p, miR-6123, miR-502b, miR-22-5p, miR-656-5p, miR-6402, miR-133a-5p, miR-28c, miR-6529b, miR-20a-5p, miR-502-5p, miR-15a, miR-4324, miR-16a, miR-374c-3p, miR-146b-3p, miR-144-3p, miR-320c, miR-6535, miR-363, miR-655-5p, miR-107 miR-1291 miR-378f miR-195a-5p miR-146b-5p miR-92a-1-5p, miR-455-5p, miR-210-5p, miR-30b-3p, miR-2284b, miR-382-3p, miR-380-5p, miR-192-3p, miR-2284a, miR-2284y, miR-380-5p, miR-376a-5p, miR-148b-5p, miR-412-3p, miR-197-3p, miR-2300b-3p, miR-873a-5p, miR-2284r, miR-30c-5p, miR-2284u, miR-455-5p, miR-33b-3p, miR-544a, miR-2284ab, miR-380-5p, miR-412, miR-3600, miR-544b, novel\_121, miR-9788-3p, miR-2284d, miR-505-5p, miR-2284k, miR-218-5p, miR-147-5p, miR-758-5p, miR-2284j, miR-2284v, miR-3059-5p, novel\_120, miR-154a, novel\_27, miR-8095, miR-2448-3p, miR-140-5p, miR-30e-5p, miR-541-5p, miR-655-5p, miR-2284g, miR-2284n, miR-670-3p, miR-544-3p, miR-582-5p

MECOM ENSOARGO(C MDS1 and 5p, miR-378b, miR-133a-3p, miR-2483-5p, miR-499b-5p, miR-2355-3p, miR-133b-3p, miR-1468, miR-133a-3p, miR-1468-5p, miR-382-3p, miR-1434-5p

HM13 ENSOARGO(histocom 5p, miR-199a-5p, miR-328-3p, miR-411b-5p, miR-3064-5p, miR-6517, miR-370-3p, miR-2285u, miR-1271, miR-147-3p, miR-6395, miR-671-5p, miR-199b-5p, miR-330-5p, miR-326-3p, miR-199a-5p, miR-4532, miR-199b-5p, miR-3064-5p, miR-3085-3p, miR-199b-5p, miR-412-5p, miR-2285j, miR-326, miR-412-5p, miR-324-3p

miR-128a-3p, miR-200c, miR-370b-3p, miR-1280a, miR-380a, miR-  
 200c-3p, miR-2898, miR-200a-3p, novel\_127, miR-1, miR-3064-  
 5p, miR-28b, miR-1271-3p, miR-3065-3p, novel\_39, miR-345-  
 3p, miR-23b-5p, miR-1343-5p, miR-300, miR-10a-5p, miR-128-  
 3p, miR-200b-3p, miR-429-3p, novel\_79, miR-2411-5p, miR-505-  
 5p, miR-2433, miR-331-3p, miR-767-5p, miR-486b-3p, miR-204-  
 5p, miR-28-5p, miR-1260b, miR-1197-3p, miR-500b-5p, miR-381-  
 3p, miR-488-3p, miR-320a, miR-362-5p, miR-3154, miR-345-  
 5p, miR-329a, miR-767, miR-671-5p, miR-485-5p, miR-141-3p, miR-  
 598-3p, miR-370-3p, miR-154b-5p, miR-223-5p, miR-2411-3p, miR-  
 194a, miR-197-5p, miR-124-5p, miR-106b-3p, miR-1343-5p, miR-  
 382, miR-345-5p, miR-542-3p, miR-1843b-5p, miR-19b-2-5p, miR-  
 873a-5p, miR-194-5p, miR-1260b, miR-30b-3p, miR-188-5p, miR-  
 7862, miR-339-5p, miR-185-5p, miR-134-3p, miR-544b, miR-  
 6529b, miR-28c, miR-502-5p, miR-382-5p, miR-206, miR-502b, miR-  
 22-5p, miR-656-5p, novel\_101, miR-542-5p, miR-24-3p, miR-  
 211, miR-2428, miR-2387, miR-18a-3p, miR-216a-3p, miR-  
 1306, miR-1291, miR-505-3p, miR-9851-3p, miR-3074-5p, miR-  
 363, miR-10a-5p, miR-320b, miR-2404, miR-146b-3p, miR-  
 6535, miR-320c, miR-542-5p, miR-2285p, miR-345-3p, miR-500a-  
 5p, miR-466i-5p, miR-320d, miR-21-3p, miR-183-5p, miR-345-  
 3p, miR-2411, miR-486-3p, miR-2424, miR-2300b-3p, miR-362-  
 3p, miR-1197-5p, miR-5703, miR-140-3p, miR-2904, miR-4429, miR-  
 18a-3p, miR-505-3p, miR-200b, miR-210-3p, miR-532-3p, miR-132-  
 5p, miR-324-3p, miR-19b-1-5p, miR-664a, miR-4492, miR-708-  
 5p, miR-4510, miR-145a-3p, miR-3074-5p, miR-206-3p, miR-10b-  
 5p, miR-6525, miR-6134, miR-598-3p, miR-129b-3p, miR-339b, miR-  
 345-5p, miR-1827, miR-625-5p, miR-548o-3p, miR-296-3p, miR-  
 3065-3p, miR-6130, miR-544-3p, miR-132-5p, miR-10a, miR-1306-  
 5p, novel\_103, miR-320b, miR-362-3p, miR-3955-3p, miR-25-  
 5p, miR-3085-3p, miR-542-5p, miR-2330-5p, miR-382-3p, miR-  
 miR-432-5p, miR-216a-3p, miR-20b, miR-27a-3p, miR-16b, miR-  
 1388-5p, miR-497-5p, miR-27b-3p, miR-432, miR-873a-5p, miR-  
 301b-5p, miR-1434-3p, miR-501-3p, miR-30c-1-3p, miR-  
 22841, miR-8485, let-7j, miR-2310, miR-424-5p, miR-106a-  
 5p, miR-487b-5p, miR-214-3p, miR-342, miR-29b-1-5p, miR-17-  
 5p, miR-16b, miR-106b-5p, miR-106a-5p, miR-299b-3p, miR-27a-  
 3p, miR-500-3p, miR-329-5p, miR-499b-5p, miR-96-5p, miR-195a-  
 5p, miR-140-5p, miR-2285ab, miR-3970, miR-3065-5p, miR-877-  
 3p, novel\_111, miR-502-3p, novel\_120, miR-342-3p, miR-335-  
 5p, miR-2285f, novel\_101, miR-335, miR-2285t, miR-15a, miR-  
 4324, miR-20a-5p, miR-6402, miR-16a, miR-301a-5p, miR-33a-  
 3p, miR-322-5p, miR-1271-5p, miR-758-5p, miR-15a-  
 5p, novel\_83, miR-299a-3p, miR-106a, miR-215-5p, miR-193b-  
 5p, miR-501-3p, miR-29b-1-5p, miR-29a-5p, miR-329a-5p, miR-  
 216c-5p, miR-3529-3p, miR-20a, miR-29b-2-5p, miR-345-3p, miR-  
 106a, miR-221-5p, miR-299-3p, miR-2285af, miR-30c-2-3p, miR-  
 192-5p, novel\_25, miR-15b-5p, miR-140-5p, miR-30c-1-3p, miR-  
 221-5p, miR-3068-3p, miR-370-3p, miR-598-3p, miR-216b-3p, miR-  
 215-5p, miR-876-3p, miR-2312, miR-20b-5p, miR-1814c, miR-598-  
 3p, miR-93-5p, miR-17-5p, miR-93, miR-2284v, miR-1271, miR-16-  
 5p, miR-3074-2-3p, miR-214, novel\_74, miR-424-5p, miR-34c-  
 3p, miR-29b-2-5p, miR-665



miR-2889, miR-378c, miR-1388-5p, miR-323b, miR-1a-3p, miR-378b, miR-223-3p, miR-216a-3p, miR-1185-3p, miR-421, miR-539-5p, miR-503-5p, miR-3431, miR-339-5p, miR-31-5p, miR-1343-3p, novel\_4, miR-193a-3p, miR-214-3p, miR-483-3p, novel\_124, miR-378a-5p, miR-197-5p, miR-323b-3p, miR-29b-1-5p, miR-2331-5p, miR-503-5p, miR-326, miR-1b-5p, miR-345-5p, miR-378d, let-7f-2-3p, let-7f-2-3p, miR-1388-3p, miR-2330-5p, miR-378f, miR-6516-3p, miR-299b-5p, miR-129b-5p, miR-3065-5p, miR-1185-2-3p, miR-378e, miR-3596, miR-2404, miR-3082-5p, miR-489, miR-7977, miR-126b-5p, miR-10b, miR-656-5p, miR-625-3p, miR-22-5p, miR-2284q, miR-206, miR-450a-5p, miR-33a-3p, miR-2440, miR-133a-5p, miR-6529b, miR-326-3p, miR-193b-3p, novel\_101, miR-17-3p, miR-2447, novel\_73, miR-2427, miR-330-5p, miR-378a-3p, miR-378i, miR-3578, miR-376a-5p, miR-193b-5p, miR-545-5p, miR-486-5p, miR-378h, miR-483-3p, miR-3600, novel\_79, miR-2285ad, miR-6517, miR-21-3p, miR-17-3p, miR-339a, miR-422a, miR-6119-5p, miR-125a-3p, miR-29a-5p, miR-450c-5p, miR-376a-5p, miR-29b-1-5p, miR-130a-5p, miR-1, miR-503-5p, miR-7144-5p, miR-671-5p, miR-345-5p, miR-339b, miR-345-5p, miR-301, miR-204-3p, miR-376c-3p, miR-376e-3p, miR-6130, miR-193b-3p, miR-532-5p, miR-378a-3p, miR-2331-3p, miR-129-5p, miR-4492, miR-17-3p, miR-378c, miR-338-3p, miR-206-3p, miR-193a-5p, miR-3074-2-3p, miR-214, miR-425-5p, miR-378c, miR-590-3p, miR-4510

miR-582-5p, miR-10a, miR-377-3p, miR-139-5p, miR-204-3p, miR-30c-1-3p, miR-548o-3p, miR-339b, miR-582-5p, miR-1827, miR-186-5p, miR-129b-3p, miR-10b-5p, miR-769-5p, miR-6525, miR-206-3p, miR-129-2-3p, miR-3184-3p, miR-3958-5p, miR-214, miR-3074-2-3p, miR-4492, miR-15b-3p, miR-95-3p, miR-7859, miR-493-3p, miR-142-3p, miR-378d, miR-2411, miR-216c-5p, miR-760-3p, miR-466i-5p, miR-500a-5p, miR-3082-5p, miR-203-3p, miR-139-5p, miR-3064-5p, miR-20a-3p, miR-2285u, miR-499b-5p, miR-7977, miR-378j, miR-2447, novel\_60, miR-3956-3p, miR-212-3p, miR-452-5p, miR-194b-5p, miR-335, miR-2285n, miR-615, miR-769-5p, miR-2285y, miR-9788-3p, miR-2459, miR-409b, miR-296-5p, miR-10b, miR-323b, miR-1a-3p, miR-30c-1-3p, miR-652-5p, miR-491-5p, miR-3085-3p, miR-25-5p, miR-214-3p, miR-342, miR-2957, miR-323b-3p, miR-769, miR-154b-5p, miR-2285aa, miR-2355-5p, miR-323-3p, miR-1260b, miR-103b, miR-2433, miR-34c-3p, miR-29b-3p, miR-5100, miR-6740-5p, miR-2411-5p, miR-129-1-3p, miR-2285ad, miR-6517, novel\_79, miR-10a-5p, miR-615-3p, miR-200a, miR-1, miR-3064-5p, miR-450a-2-3p, novel\_96, miR-1260a, miR-30c-2-3p, miR-339a, miR-374c-3p, miR-29a-3p, miR-670-3p, miR-669, novel\_68, miR-10a-5p, miR-410-5p, miR-7975, miR-2387, miR-3141, miR-3065-5p, miR-2284w, miR-2285m, miR-342-3p, miR-335-5p, miR-29c-3p, miR-206, miR-29a, novel\_87, miR-3431, miR-185-5p, miR-3955-5p, miR-339-5p, miR-26b-3p, miR-29b, miR-1260b, miR-708-3p, miR-1434-3p, miR-194-5p, miR-654-3p, miR-377-3p, miR-3141, miR-197-5p, miR-194a

SEC23B ENSOARGO(Sec23 homolog)

NMNAT2 ENSOARGO(nicotinamide)

miR-4510, miR-129-2-3p, miR-6525, miR-93, miR-338-3p, miR-145-3p, miR-99b-3p, miR-125b-5p, miR-592, miR-208b-5p, miR-129-5p, miR-4492, miR-532-5p, miR-125a, miR-141-3p, miR-99a-3p, miR-365a-3p, miR-6130, miR-204-3p, miR-17-5p, miR-411, miR-129b-3p, miR-93-5p, let-7g-3p, miR-20b-5p, miR-3064-5p, miR-20a, miR-125b-2-3p, miR-450b-5p, miR-200a, novel\_17, miR-125b, miR-324-3p, miR-99a-3p, miR-106a, miR-200a-3p, miR-2484, miR-30b-3p, miR-106a, miR-423-3p, miR-6517, miR-2285ad, miR-412, miR-129-1-3p, miR-330-5p, miR-1434-5p, miR-184-3p, miR-3059-5p, miR-2447, miR-495-3p, miR-326-3p, miR-133a-5p, miR-101-3p, miR-20a-5p, miR-382-3p, miR-4324, miR-2285n, miR-33a-3p, miR-2285y, miR-1843a-3p, miR-452-3p, miR-3064-5p, miR-129b-5p, miR-2330-5p, miR-101b-3p, miR-106a-5p, miR-296-3p, miR-296-3p, miR-326, miR-17-5p, miR-106b-5p, miR-106a-5p, miR-3085-3p, miR-125a-5p, miR-412-5p, miR-20b, miR-412-3p, miR-2284x  
miR-34c-5p, miR-235b-5p, miR-141-3p, miR-125a, miR-329b, let-7g-3p, miR-2318, miR-329a, miR-23a-5p, miR-671-5p, miR-1248, miR-320a, miR-145-3p, miR-181c-3p, miR-16-5p, miR-138-5p, miR-28-5p, miR-134-5p, miR-551b-3p, miR-410-5p, miR-29b-3p, miR-2332, miR-370-5p, miR-100-3p, miR-125b-5p, miR-6740-5p, miR-3969, miR-322-5p, miR-134-5p, miR-214-5p, novel\_121, miR-129-1-3p, miR-222, novel\_79, miR-196a-2-3p, miR-128-3p, let-7a-2-3p, miR-134, miR-29d-3p, miR-1343-5p, miR-330-5p, miR-23b-5p, miR-28b, novel\_39, miR-3065-3p, miR-1271-3p, miR-3956-5p, miR-3529-3p, miR-17-3p, miR-107, miR-200a-3p, novel\_127, miR-205-5p, miR-181c-3p, miR-339a, miR-146b-3p, miR-29a-3p, miR-34b, miR-669, miR-320c, novel\_68, miR-1291, miR-107, miR-2319a, miR-195a-5p, miR-150-5p, miR-3065-5p, miR-18a-3p, miR-216a-3p, miR-371b-3p, miR-326-3p, miR-449a, miR-3957-3p, miR-1839-3p, miR-29c-3p, miR-1193, miR-17-3p, miR-495-3p, novel\_1, miR-29a, miR-147-5p, miR-502b, miR-15a, miR-28c, miR-34c, miR-16a, miR-432-5p, miR-503-5p, miR-194-3p, novel\_116, miR-149-5p, miR-103, miR-103a-3p, miR-339-5p, miR-377-5p, miR-29b, miR-138, miR-16b, miR-16-1-3p, miR-497-5p, miR-7862, miR-19b-2-5p, miR-432, let-7a-2-3p, miR-125a-5p, miR-1343-5p, miR-503-5p, novel\_51, miR-136-3p, miR-499b-3p, miR-6130, miR-204-3p, miR-151b, miR-15b-5p, miR-504-5p, miR-3065-3p, miR-216b-3p, miR-370-5p, miR-339b, miR-625-5p, miR-129b-3p, miR-6525, miR-145a-3p, miR-4510, miR-129-2-3p, novel\_74, miR-6516-3p, miR-487b-5p, miR-17-3p, miR-487a-5p, miR-708-5p, miR-424-5p, miR-222-3p, miR-19b-1-5p, miR-320e, miR-665, miR-7859, miR-15a-5p, miR-151-5p, miR-532-3p, miR-548e-3p, miR-18a-3p, miR-493-3p, miR-33b-3p, miR-4429, miR-16-1-3p, miR-34a-5p, miR-378d, miR-2300b-3p, miR-362-3p, miR-124-3p, miR-188-3p, miR-5703, miR-140-3p, miR-377-5p, miR-503-5p, miR-320d, miR-34b-

BRF2 ENSOARGO(BRF2, RN)

PLA2G5 ENSOARGO(phosphol

miR-1185-2-3p, novel\_69, miR-2483-3p, miR-331-5p, miR-300-3p, miR-3120-3p, miR-26b-5p, miR-329-5p, miR-452-3p, miR-3068-3p, miR-32-5p, miR-146b-5p, miR-543-3p, let-7g-3p, miR-3154, miR-137-3p, miR-338-3p, miR-181c-5p, miR-181d-5p, miR-2330-3p, miR-885-5p, miR-363-3p, miR-539-5p, novel\_120, miR-28a-3p, miR-2284q, miR-129-5p, novel\_74, novel\_63, miR-1185-3p, miR-3431, miR-142-3p, miR-3955-5p, miR-450b-5p, miR-1434-5p, miR-3071-5p, miR-181a-5p, let-7j, miR-146a-5p, miR-142a-3p, let-7c-3p, miR-195a-3p, miR-329a-5p, miR-1277-5p, miR-146b, miR-181b-5p, miR-28-3p, miR-32, miR-146a, novel\_103, miR-2285af, miR-196a-3p, miR-322-5p, miR-2284z, miR-450a-1-3p, miR-2285ad, miR-412, miR-18b-5p, miR-450b-5p, miR-192-3p, miR-3064-5p, miR-6536, miR-205-5p, miR-125a-3p, miR-3071-3p, miR-300-3p, miR-3959-5p, miR-133c, miR-2285aa, miR-1271, miR-329a, miR-345-5p, miR-1248, miR-30e-5p, miR-331-5p, miR-301, miR-137-3p, miR-23b, miR-16-5p, miR-331-5p, novel\_9, miR-3432a, miR-100-3p, miR-412-5p, miR-3431, miR-134-3p, miR-194-3p, miR-149-5p, miR-31-5p, miR-16b, miR-3432b, miR-16-1-3p, miR-497-5p, miR-432, miR-19b-2-5p, miR-2113, miR-7b-5p, miR-542-3p, miR-450c-3p, novel\_23, miR-2285r, miR-6240, miR-7-5p, miR-146a, novel\_69, miR-3074-5p, miR-410-5p, miR-412-3p, miR-146b-5p, miR-3970, miR-2284w, miR-1839-3p, miR-29c-3p, miR-29a, miR-421-5p, miR-4324, miR-142b, miR-7859, miR-23b-3p, miR-23c, miR-30d-3p, miR-184-3p, miR-664-5p, miR-16-1-3p, miR-218-1-3p, miR-361-5p, miR-34a-5p, miR-30c-5p, miR-193b-5p, miR-2285i, miR-142a-3p, miR-377-5p, miR-345-3p, miR-30b, miR-618, miR-219b-5p, miR-122-3p, miR-92a-1-5p, miR-499b-3p, miR-15b-5p, miR-30c-1-3p, miR-2331-3p, miR-216b-3p, miR-296-3p, miR-345-5p, miR-2285c, miR-450a-1-3p, miR-30d-5p, miR-769-5p, miR-3184-5p, miR-3074-5p, miR-3958-5p, miR-1468-5p, miR-874-5p, miR-129-5p, miR-2285j, miR-30e-3p, miR-151-3p, miR-30a-3p, miR-3604, miR-664a-5p, miR-153, miR-539-5p, miR-455-3p, miR-421, miR-126a-5p, miR-330-3p, miR-362-3p, miR-1839-5p, miR-329-3p, miR-323b, miR-758-3p, miR-8485, miR-124a, miR-23a-3p, miR-744-3p, miR-146b, miR-153-3p, miR-323b-3p, miR-182-5p, miR-16b, miR-499a-3p, miR-378g, miR-203-3p, miR-1983, miR-361-3p, novel\_111, miR-423-5p, miR-2447, miR-3968, miR-218-5p, miR-582-3p, miR-545-5p, miR-582-3p, miR-29d-3p, miR-30a-5p, miR-1957a, miR-1271-3p, miR-490-3p, miR-30a-3p, miR-191-3p, miR-30c-2-3p, miR-34c-5p, miR-769, miR-365a-3p, miR-370-3p, miR-615-5p, miR-3074-1-3p, miR-488-3p, miR-

WASL ENSOARGO(Wiskott-)

PSMA4 ENSOARGO( proteaso)

miR-28c, miR-6402, miR-502-5p, miR-1247-3p, miR-4324, miR-15a, miR-16a, novel\_1, miR-128-1-5p, miR-22-5p, miR-203b-5p, novel\_101, miR-3959-3p, miR-1307-3p, miR-301b-3p, miR-376b-3p, miR-1306, miR-19a-3p, miR-412-3p, miR-107, miR-195a-5p, miR-7975, miR-329-5p, miR-3120-3p, miR-7-1-3p, miR-320b, miR-411b-3p, miR-181b-3p, miR-677, miR-144-3p, miR-296-3p, miR-7-5p, novel\_51, miR-483-3p, miR-493-5p, miR-668-3p, miR-432-3p, miR-296-3p, miR-7b-5p, miR-19b-2-5p, miR-1260b, miR-16b, miR-138, miR-744-5p, miR-4508, miR-497-5p, miR-103a-3p, miR-26b-3p, miR-130a-3p, miR-2285g, miR-544b, miR-103, miR-409-3p, miR-144, miR-138-5p, miR-486b-3p, miR-28-5p, novel\_42, miR-1306-5p, miR-16-5p, miR-1260b, miR-424-3p, miR-23b, miR-874-3p, miR-215-5p, miR-370-3p, miR-154b-5p, miR-324-5p, miR-2397-5p, miR-1260a, miR-205-5p, miR-376b-3p, miR-181c-3p, miR-191-3p, miR-450a-2-3p, novel\_96, miR-543-5p, miR-107, miR-3529-3p, miR-4286, miR-28b, miR-23b-5p, miR-885-3p, miR-222, miR-483-3p, miR-322-5p, miR-2440, miR-107-5p, miR-628-3p, miR-2284q, miR-3956-3p, miR-541-3p, miR-32-3p, novel\_60, miR-2447, miR-423-5p, miR-221, miR-378j, miR-9-3p, miR-1983, miR-376a-3p, miR-493-5p, miR-541-5p, miR-3082-5p, miR-376d, miR-4443, miR-1306-5p, miR-5126, miR-16b, miR-25-5p, miR-130b-3p, miR-491-5p, miR-214-3p, miR-2285o, miR-103a-2-5p, miR-2330-5p, miR-424-5p, miR-127-3p, miR-124a, miR-676-3p, miR-23a-3p, miR-4532, miR-541, miR-296-5p, miR-6529a, miR-125b-2-3p, miR-544a, novel\_78, miR-548w, miR-2300a-5p, miR-181b-2-3p, miR-376b-3p, miR-2285e, miR-148b-5p, miR-221-3p, miR-30e-3p, miR-222-3p, miR-2285j, miR-30a-3p, miR-19b-1-5p, miR-708-5p, miR-4492, miR-454-3p, miR-4510, miR-214, miR-3184-5p, miR-2285c, miR-21a-3p, miR-885-3p, miR-32-3p, miR-6130, miR-192-5p, miR-544-3p, miR-301a-3p, miR-582-5p, miR-15b-5p, miR-204-3p, novel\_17, miR-196a-3p, miR-185-3p, miR-22-3p, miR-670-3p, miR-2284s, miR-378g, miR-615-5p, miR-320b, miR-2355-5p, miR-504-5p, miR-2284g, miR-9851-3p, miR-504, miR-767, miR-18a-3p, miR-362-5p, miR-150-5p, miR-3970, miR-1306, miR-129b-3p, miR-361-3p, novel\_27, miR-362-5p, miR-500b-5p, miR-361-3p, miR-214, miR-665-5p, miR-135a-2-3p, miR-486b-3p, miR-203b-5p, miR-767-5p, miR-4726-5p, miR-128-1-5p, miR-320e, miR-665, miR-324-3p, miR-485-3p, miR-2284o, miR-500-5p, miR-134-3p, miR-340-3p, miR-18a-3p, miR-2284u, miR-133a-3p, miR-30b-3p, miR-30b-3p, miR-2904, miR-22-3p, miR-223-3p, miR-2366, miR-2284a, miR-486-3p, miR-2284y, miR-125b-2-3p, miR-2284b, miR-2284f, novel\_127, miR-214-3p, miR-127-5p, miR-2957, miR-1306-5p

EXOC6 ENSOARGO(exocyst)

SLC13A5 ENSOARGO(solute c)

miR-670-3p, miR-323a-5p, miR-7-1-3p, miR-639b, miR-195a-5p, miR-107, miR-1291, miR-18a-3p, miR-2285ab, miR-2428, novel\_27, miR-326-3p, miR-24-3p, miR-211, miR-17-3p, novel\_101, miR-2285x, miR-135a-2-3p, miR-147-5p, miR-199c, miR-128-1-5p, miR-16a, miR-502-5p, miR-15a, miR-103, miR-185-5p, miR-2285g, miR-377-5p, miR-26b-3p, miR-455-5p, miR-30b-3p, miR-873a-5p, miR-345-5p, miR-363-5p, miR-130b-5p, miR-125a-5p, miR-1343-5p, miR-455-5p, miR-199a-5p, miR-615-5p, miR-215-5p, miR-23a-5p, miR-362-5p, miR-3154, miR-378c, miR-500b-5p, miR-204-5p, miR-486b-3p, miR-28-5p, miR-26c, miR-331-3p, miR-2332, miR-5100, miR-378h, miR-1271-5p, miR-2411-5p, miR-128-3p, miR-490-3p, miR-3065-3p, miR-199a-5p, miR-28b, miR-181a-2-3p, miR-4286, miR-2385-3p, miR-107, miR-2898, miR-17-3p, miR-339a, miR-378e, miR-452-3p, miR-877-3p, miR-199b-5p, miR-219a-2-3p, miR-362-5p, miR-2285f, miR-541-3p, miR-212-3p, novel\_60, miR-3059-5p, miR-4726-5p, miR-2285e, miR-500-5p, miR-142-3p, miR-2300a-5p, novel\_4, miR-378c, miR-30b-3p, miR-412-3p, miR-484, miR-296-5p, miR-378b, miR-1839-3p, miR-424-5p, miR-494-3p, miR-2285o, miR-1306-5p, miR-326, miR-155-5p, miR-323-5p, miR-6130, miR-132-5p, miR-192-5p, miR-3065-3p, miR-378a-3p, miR-2312, let-7g-3p, miR-6134, miR-338-3p, miR-1271, miR-145a-3p, miR-4510, miR-378c, miR-424-5p, miR-708-5p, miR-664a, miR-17-3p, miR-324-3p, miR-532-3p, miR-148b-3p, miR-15a-5p, miR-383-5p, miR-1197-5p, miR-140-3p, miR-5703, miR-2904, miR-124-3p, miR-215-5p, miR-2300b-3p, novel\_133, miR-2411, miR-130a-5p, miR-125b-2-3p, miR-21-3p, miR-760-3p, miR-466i-5p, miR-125b, miR-185-3p, miR-196a-3p, miR-669, novel\_69, miR-3074-5p, novel\_68, miR-378f, miR-216a-3p, miR-150-5p, miR-1306, miR-148a-3p, miR-199b-5p, miR-1839-3p, miR-6123, miR-28c, miR-576-3p, miR-1324, miR-149-5p, miR-194-3p, miR-134-3p, miR-6238, miR-376c-5p, miR-376b-5p, miR-376b-5p, miR-376c-5p, miR-376c-5p, miR-16-2-3p, novel\_48

FCHSD1 ENSOARGO(FCH and

GCFC2 ENSOARGO(GC-rich

miR-500a-5p, miR-125b, miR-92a-1-5p, miR-210-5p, miR-1277-5p, miR-92a-3p, miR-2898, miR-450a-2-3p, miR-3064-5p, miR-4286, miR-376b-5p, miR-3065-3p, miR-376c-5p, miR-490-3p, miR-143-3p, miR-376a-5p, miR-92b-3p, miR-377-5p, miR-2427, miR-29d-3p, miR-2904, miR-188-3p, miR-330-5p, miR-2408, miR-193b-5p, novel\_73, miR-1224-5p, miR-199a-3p, miR-532-3p, novel\_121, miR-129-1-3p, miR-6740-5p, miR-125b-5p, miR-665, miR-29b-3p, miR-551b-3p, novel\_74, miR-433-5p, miR-129-2-3p, miR-500b-5p, miR-224-5p, miR-129b-3p, miR-362-5p, miR-488-3p, miR-2285c, miR-7144-5p, miR-543-3p, miR-671-5p, miR-1248, miR-10b-3p, miR-2355-5p, miR-3065-3p, miR-532-5p, miR-125a, miR-32-5p, miR-3068-3p, miR-377-3p, miR-25-3p, miR-3965, miR-216b-5p, miR-32, miR-224-5p, miR-199a-3p, novel\_103, miR-377-3p, miR-326, miR-452-5p, miR-125a-5p, miR-3085-3p, miR-363-5p, miR-744-3p, miR-193a, miR-145a-5p, miR-542-3p, miR-16-2-3p, miR-7862, miR-21-5p, miR-29b, miR-450b-5p, miR-665, miR-377-5p, miR-145b, miR-133b-5p, miR-500-5p, novel\_116, miR-2285e, miR-2285g, miR-3431, miR-185-5p, miR-4324, miR-101-3p, miR-92a-3p, miR-29a, miR-29c-3p, miR-495-3p, novel\_60, miR-3059-5p, miR-3956-3p, miR-363-3p, miR-326-3p, miR-362-5p, miR-24-3p, miR-21c, miR-3065-5p, miR-9-3p, miR-136-5p, miR-499b-5p, miR-7977, miR-7-1-3p, miR-3064-5p, miR-452-3p, miR-378b, miR-216b-3p, miR-29a-3p, miR-300-3p, miR-154b-5p, miR-133c, miR-324-5p, miR-199a-5p, miR-1271, miR-615-5p, miR-215-5p, miR-2355-5p, miR-1248, miR-7144-5p, miR-331-5p, miR-1260b, miR-378c, miR-16-5p, miR-331-5p, miR-204-5p, miR-134-5p, miR-486b-3p, miR-5100, miR-378h, miR-6516-5p, miR-9-5p, miR-322-5p, miR-214-5p, miR-134-5p, miR-6517, miR-299a-3p, miR-222, miR-431, miR-7641, let-7d, miR-105-2, miR-134, miR-23b-5p, miR-1343-5p, miR-490-3p, let-7g, novel\_39, miR-199a-5p, miR-3065-3p, miR-4286, miR-30a-3p, miR-3064-5p, miR-2385-3p, miR-29b-2-5p, let-7f-5p, miR-127-5p, miR-450a-2-3p, miR-2898, miR-543-5p, novel\_96, novel\_127, miR-107, miR-6119-5p, miR-1260a, let-7c-5p, novel\_69, miR-299b-3p, miR-146b-3p, miR-2404, miR-181b-3p, miR-677, miR-669, miR-3120-3p, miR-655-5p, miR-107, miR-378f, miR-6395, miR-195a-5p, let-7e-5p, miR-9851-3p, miR-18a-3p, miR-150-5p, miR-1306, miR-211, miR-199b-5p, miR-3957-3p, miR-502-5p, miR-15a, miR-33a-3p, let-7i, miR-16a, let-7g-5p, miR-134-3p, miR-103, miR-411-5p, miR-103a-3p, miR-219a-1-3p, miR-1260b, miR-30b-3p, miR-16b, miR-27b-3p, miR-188-5p, miR-497-5p, miR-1843b-5p, miR-374b-3p, miR-22-3p, miR-431-3p, miR-432-3p, miR-432-3p, miR-2285r, miR-503-3p, miR-6412, miR-378a-5p, miR-1343-5p, miR-2285v, miR-105-5p, miR-6516, miR-582-5p, miR-192-5p, miR-15b-5p, let-7i-5p, miR-22-3p, novel\_32, miR-548o-3p, miR-221-5p, miR-378a-3p, miR-182-5p, miR-296-3p, miR-3065-3p, miR-1827, novel\_99, miR-582-5p, miR-129b-3p, miR-346, miR-6525, miR-338-3p, miR-6134, let-7b-5p, miR-145a-3p, let-7b, miR-378c, novel\_74, miR-424-5p, miR-874-5p, miR-30e-3p, miR-222-3p, let-7f, miR-29b-2-5p, miR-665, miR-30a-3p, miR-151-3p, miR-15a-5p, miR-328-3p, miR-18a-3p, miR-30d-3p, miR-941, miR-493-3p, miR-215-5p, miR-1961, miR-378i, miR-378a-3p, miR-5703, miR-1193, miR-2904, miR-664b-3p, miR-486-3p, miR-105-3p, miR-182-5p, miR-98-

GOT1L1 ENSOARGO( glutamic acid synthase)

SYNDIG1L ENSOARGO( synapse)

|        |                   |                                                                                                                                                                                                                                                                                                                                                                                                                                                                                                                                                                                                                                                                                                                                                                                                                                                                                                                                                                                                                                             |
|--------|-------------------|---------------------------------------------------------------------------------------------------------------------------------------------------------------------------------------------------------------------------------------------------------------------------------------------------------------------------------------------------------------------------------------------------------------------------------------------------------------------------------------------------------------------------------------------------------------------------------------------------------------------------------------------------------------------------------------------------------------------------------------------------------------------------------------------------------------------------------------------------------------------------------------------------------------------------------------------------------------------------------------------------------------------------------------------|
|        |                   | miR-15a, miR-6402, miR-16a, miR-6119-3p, miR-379-3p, miR-656-5p, miR-147-5p, miR-3059-5p, novel_120, miR-194b-5p, miR-190b-5p, miR-2285x, miR-8095, miR-3065-5p, miR-3963, miR-493-5p, miR-195a-5p, miR-6516-3p, miR-139-5p, miR-655-5p, miR-541-5p, miR-190a, miR-16b, miR-194a, miR-214-3p, miR-424-5p, miR-432-3p, miR-2310, miR-4791, miR-1298-5p, miR-194-5p, miR-2284ab, miR-16b, miR-26a-2-3p, miR-497-5p, miR-548w, miR-3535, miR-148b-5p, miR-421, miR-30e-3p, miR-135a-1-3p, miR-30a-3p, miR-655-3p, miR-331-5p, miR-6516-3p, miR-424-5p, miR-190a-5p, miR-590-3p, miR-16-5p, miR-214, miR-145-3p, miR-21a-3p, miR-331-5p, miR-655, miR-543-3p, miR-186-5p, miR-1814c, miR-1271, miR-27a-5p, miR-139-5p, miR-15b-5p, miR-205-5p, miR-2285p, miR-3071-3p, miR-500a-5p, miR-217, miR-2284m, miR-127-5p, miR-1a-2-5p, miR-21-3p, miR-216c-5p, miR-30a-3p, miR-450b-5p, miR-2478, miR-125b-2-3p, miR-1197-5p, miR-1434-5p, miR-217-5p, miR-411-3p, miR-148a-5p, miR-30d-3p, miR-322-5p, miR-505-5p, miR-758-5p, miR-15a-5p, novel_121 |
| NOX1   | ENSOARGO(NADPH ox |                                                                                                                                                                                                                                                                                                                                                                                                                                                                                                                                                                                                                                                                                                                                                                                                                                                                                                                                                                                                                                             |
|        |                   | miR-181a-2-3p, miR-340-3p, miR-4443, novel_39                                                                                                                                                                                                                                                                                                                                                                                                                                                                                                                                                                                                                                                                                                                                                                                                                                                                                                                                                                                               |
| RALBP1 | ENSOARGO(ralA bin | miR-1260b, miR-361-3p, miR-4510, miR-342-3p, miR-193a-5p, miR-3957-3p, miR-128-1-5p, miR-576-3p, miR-6529b, miR-665, miR-320e, miR-6740-5p, miR-331-3p, novel_69, miR-670-3p, miR-6130, miR-146b-3p, miR-377-3p, miR-4443, miR-874-3p, miR-552-3p, miR-329a, miR-450b-3p, novel_94, miR-1827, miR-625-5p, miR-                                                                                                                                                                                                                                                                                                                                                                                                                                                                                                                                                                                                                                                                                                                              |
|        |                   | 361-3p, miR-378j, miR-3154, miR-29b-1-5p, miR-143-3p, novel_39, miR-191-3p, miR-25-5p, miR-1343-5p, miR-377-3p, miR-342, miR-1260a, novel_51, miR-29b-1-5p, miR-362-3p, miR-185-5p, miR-1343-3p, miR-145b, miR-3600, miR-1260b, miR-362-3p, miR-1285, miR-2366, miR-362-3p, miR-2408, miR-329-3p, miR-296-5p, miR-145a-5p, miR-1343-5p                                                                                                                                                                                                                                                                                                                                                                                                                                                                                                                                                                                                                                                                                                      |
| MUC5B  | ENSOARGO(mucin 5B |                                                                                                                                                                                                                                                                                                                                                                                                                                                                                                                                                                                                                                                                                                                                                                                                                                                                                                                                                                                                                                             |

miR-214, miR-42b-5p, miR-3074-2-3p, miR-378c, miR-6134, miR-3184-5p, miR-6525, miR-665, miR-708-5p, miR-874-5p, miR-4492, miR-424-5p, miR-664a, miR-17-3p, miR-3065-3p, miR-378a-3p, miR-30c-1-3p, miR-15b-5p, miR-323-5p, miR-499b-3p, miR-411, miR-1827, miR-183-5p, miR-329a-5p, miR-486-3p, miR-29b-1-5p, miR-345-3p, miR-422a, miR-185-3p, miR-299-3p, miR-21-3p, miR-2484, miR-30b-3p, miR-760-3p, miR-212-5p, miR-3600, miR-328-3p, miR-15a-5p, miR-378a-3p, miR-378i, novel\_133, miR-378d, miR-3059-5p, miR-423-5p, miR-2284q, miR-211-5p, miR-499b-5p, miR-3064-5p, miR-4792, miR-499a-3p, miR-378e, miR-378j, miR-361-3p, miR-424-5p, miR-1388-3p, miR-3187-3p, miR-193a, miR-4532, miR-30c-1-3p, miR-378d, miR-16b, miR-29b-1-5p, miR-326, miR-214-3p, miR-3085-3p, miR-222-5p, miR-1343-3p, miR-455-3p, miR-7857, miR-378b, miR-2284r, miR-3120-5p, miR-378c, miR-16-5p, novel\_42, miR-145-3p, miR-378c, miR-2433, miR-486b-3p, miR-28-5p, miR-204-5p, miR-31-3p, miR-2355-5p, miR-3957-5p, miR-3957, miR-3154, miR-301, miR-671-5p, miR-485-5p, miR-23a-5p, let-7g-3p, miR-10b-3p, miR-3064-5p, miR-490-3p, miR-192-3p, miR-3065-3p, miR-28b, miR-148b-5p, miR-30c-2-3p, miR-2285af, miR-543-5p, miR-17-3p, miR-450a-2-3p, miR-6517, miR-299a-3p, novel\_121, miR-483-3p, miR-378h, miR-505-5p, miR-322-5p, miR-23b-5p, miR-330-5p, miR-1343-5p, miR-345-3p, let-7a-2-3p, miR-411-3p, miR-17-3p, miR-3957-3p, miR-2428, novel\_27, miR-326-3p, miR-211, miR-16a, miR-28c, miR-133a-5p, miR-15a, miR-147-5p, miR-379-3p, miR-128-1-5p, miR-329-5p, miR-378b, miR-6535, miR-299b-3p, miR-323a-5p, miR-378f, miR-6395, miR-195a-5p, miR-363-5p, miR-2483-5p, let-7a-2-3p, miR-432-3p, miR-2285r, miR-2411-3p, novel\_51, miR-466f-3p, miR-1343-5p, miR-483-3p, miR-194-3p, miR-3071-5p, miR-197-3p, miR-1285, miR-4508, miR-197-5p, miR-16b



miR-29c-3p, miR-2285x, miR-17-3p, miR-1a-1-5p, miR-33b-5p, novel\_27, miR-326-3p, miR-449a, miR-2428, miR-301b-3p, miR-2284w, miR-34c, miR-502-5p, miR-1247-3p, miR-576-3p, miR-625-3p, miR-22-5p, miR-199c, miR-29a, miR-379-3p, miR-320b, miR-655-5p, miR-10a-5p, miR-378b, miR-677, miR-181b-3p, miR-323a-5p, miR-146b-3p, miR-29a-3p, miR-411b-3p, miR-299b-3p, miR-670-3p, miR-34b, miR-18a-3p, miR-376b-3p, miR-148a-3p, miR-2387, miR-376a-2-5p, miR-135b-5p, miR-668-3p, miR-345-5p, miR-654-3p, miR-432-3p, miR-432-3p, miR-377-3p, miR-660, miR-466f-3p, miR-130a-3p, miR-6238, miR-2355-3p, miR-432-5p, miR-2284d, miR-134-3p, miR-185-5p, miR-22-3p, miR-374b-3p, miR-3071-5p, miR-432, miR-653, miR-1285, miR-2284x, miR-29b, miR-30b-3p, miR-16-1-3p, miR-2284v, miR-500b-5p, miR-331-3p, miR-409-3p, miR-135a-5p, miR-29b-3p, miR-1-5p, miR-2284k, miR-494-5p, miR-5100, miR-134-5p, miR-28-5p, novel\_9, miR-767-5p, miR-2355-5p, miR-487a-3p, miR-3068-3p, miR-874-3p, miR-133c, miR-34c-5p, miR-365a-3p, miR-362-5p, miR-320a, miR-485-5p, miR-876-3p, miR-767, miR-345-5p, miR-2318, miR-329a, miR-3064-5p, miR-200a, novel\_39, miR-2284y, miR-3065-3p, miR-29a-5p, miR-2284a, miR-490-3p, miR-450b-5p, miR-30c-2-3p, miR-376b-3p, miR-664-3p, miR-543-5p, miR-152-3p, novel\_127, miR-17-3p, miR-6536, miR-1a-2-5p, miR-412, miR-376a-5p, miR-299a-3p, miR-2285ad, miR-134-5p, miR-214-5p, miR-24-2-5p, miR-6516-5p, miR-29d-3p, miR-23b-5p, miR-330-5p, miR-134, miR-10a-5p, miR-411-3p, miR-582-3p, miR-2284j, miR-2447, miR-3059-5p, miR-541-3p, miR-362-5p, miR-361-3p, miR-2285y, miR-301a-5p, miR-218-5p, miR-2440, miR-490-5p, miR-154-3p, miR-3968, miR-3958-3p, miR-335, miR-2285u, miR-7977, miR-664b, miR-139-5p, miR-2284g, miR-3064-5p, miR-20a-3p, miR-203-3p, miR-376d, miR-7857-3p, miR-378g, miR-361-3p, miR-376a-3p, miR-877-3p, miR-2284h, miR-382-3p, miR-193a, miR-30c-1-3p, miR-362-

KIF2C ENSOARGO(kinesin

miR-493-5p, miR-101-5p, miR-22841, miR-34b-5p, miR-503-3p, miR-146a, miR-124-5p, miR-378a-5p, miR-466f-3p, miR-133b-5p, miR-130a-3p, miR-2285g, miR-3431, miR-2113, miR-1434-3p, miR-450c-3p, novel\_23, miR-16b, miR-497-5p, miR-495-3p, miR-301b-3p, miR-15a, miR-142b, miR-16a, miR-425-5p, miR-6119-3p, miR-656-5p, miR-421-5p, miR-411b-3p, miR-144-3p, miR-320c, miR-677, miR-181b-3p, miR-148a-3p, miR-18b, miR-3065-5p, miR-19a-3p, miR-412-3p, miR-146b-5p, miR-195a-5p, miR-181a-2-3p, miR-380-5p, miR-450b-5p, miR-148b-5p, miR-192-3p, miR-2285af, miR-200c, miR-30f, miR-217, miR-200c-3p, novel\_96, miR-152-3p, miR-429-3p, miR-18b-5p, miR-322-5p, miR-6516-5p, miR-545-5p, miR-582-3p, miR-450a-1-3p, novel\_121, miR-345-3p, miR-30a-5p, miR-300, miR-155-5p, miR-1306-5p, miR-16-5p, miR-410-5p, miR-144, miR-409-3p, miR-374b-3p, miR-2285aa, miR-598-3p, miR-769, miR-376c-3p, miR-381-3p, miR-30e-5p, miR-301, miR-2448-3p, miR-320a, miR-18a, miR-23b, miR-10b-3p, miR-345-5p, miR-671-5p, miR-424-5p, miR-23a-3p, miR-33a-5p, miR-758-3p, miR-320b, miR-182-5p, miR-16b, miR-491-5p, miR-3955-3p, miR-130b-3p, miR-146b, miR-181b-2-3p, miR-539-5p, miR-142-3p, miR-2285e, miR-6529a, miR-296-5p, miR-484, miR-758-3p, miR-1388-5p, miR-2426, miR-1839-5p, miR-21b, miR-3120-5p, miR-885-5p, miR-8095, miR-769-5p, miR-490-5p, miR-2285t, miR-20a-3p, miR-541-5p, miR-454-5p, miR-140-5p, miR-493-5p, miR-1983, miR-195a-3p, miR-421-5p, miR-376a-5p, miR-142a-3p, miR-376c-3p, miR-181b-1-3p, miR-146a-5p, miR-2432, miR-2285p, miR-500a-5p, miR-345-3p, miR-320d, miR-1277-5p, miR-30b-3p, miR-2484, miR-3600, miR-485-3p, miR-23b-3p, miR-487a-3p, miR-7859, miR-15a-5p, miR-23c, miR-148b-3p, novel\_133, miR-1246, miR-1434-5p, miR-217-5p, miR-140-3p, miR-4429, miR-142-3p, miR-10b-3p, miR-218-1-3p, miR-361-5p, miR-769-5p, miR-21c, miR-2319a, miR-671-5p, miR-10a-5p, miR-10a, miR-670-3p, miR-203-3p, miR-665, miR-628-3p, miR-2284q, miR-6128, miR-214, miR-361-3p, miR-10b-5p, miR-10b, miR-21-5p, novel\_73, miR-2889, miR-10a-5p, miR-665, miR-26b-3p, miR-142-3p, miR-2284h-5p, miR-199a-3p, miR-199a-3p, miR-374a-5p, miR-125a-3p, miR-2397-5p, miR-191-3p, miR-214-3p, miR-2285w, miR-142a-3p

HMG5 ENSOARGO(high mob

CHRNA3 ENSOARGO(choliner

GIMAP8 ENSOARGO(GTPase,

miR-296-3p, miR-306b-3p, miR-504-5p, miR-221-5p, miR-2331-3p, miR-204-3p, miR-139-5p, miR-376e-3p, miR-450a-1-3p, miR-1827, miR-186-5p, miR-345-5p, miR-133b-3p, miR-214, miR-145a-3p, miR-6134, miR-346, miR-338-5p, miR-320e, miR-665, miR-30a-3p, miR-874-5p, miR-664a, miR-450b-3p, novel\_74, miR-485-3p, miR-30d-3p, miR-3600, miR-18a-3p, miR-328-3p, miR-2284h-5p, miR-532-3p, miR-487a-3p, miR-5703, miR-2904, miR-376a-5p, miR-2284u, miR-148a-5p, miR-16-1-3p, miR-4429, novel\_73, miR-345-3p, miR-195a-3p, miR-2285w, miR-216c-5p, miR-376c-3p, miR-376a-5p, miR-421-5p, miR-29b-1-5p, miR-125b, miR-345-3p, miR-92a-1-5p, novel\_17, miR-221-5p, miR-1277-5p, miR-320d, miR-2284m, miR-7977, miR-211-5p, miR-126b-5p, miR-20a-3p, miR-2284g, miR-139-5p, miR-129b-5p, miR-504, miR-136-5p, miR-2284j, miR-541-3p, miR-2447, miR-7705, miR-107-5p, miR-490-5p, miR-3968, miR-2300a-5p, miR-1343-3p, miR-126a-5p, miR-455-3p, miR-148b-5p, miR-425-3p, miR-323b, miR-541, miR-2284r, miR-544a, miR-2284b, miR-33a-5p, miR-494-3p, miR-2310, miR-4532, miR-323b-3p, miR-29b-1-5p, novel\_115, miR-320b, miR-214-3p, miR-103a-2-5p, miR-1185-5p, miR-125a, miR-542-5p, miR-3068-3p, miR-874-3p, miR-2284n, miR-331-5p, miR-374c-3p, miR-320a, miR-200a-5p, miR-2448-3p, miR-301, miR-381-3p, miR-485-5p, miR-671-5p, miR-1814c, miR-345-5p, miR-767, miR-10b-3p, miR-133a-3p, miR-2284v, miR-145-3p, miR-1260b, miR-3969, miR-331-3p, miR-125b-5p, miR-551b-3p, miR-2284k, miR-29b-3p, miR-204-5p, miR-767-5p, miR-138-5p, miR-545-5p, miR-450a-1-3p, miR-758-5p, miR-29d-3p, miR-345-3p, miR-3591-5p, miR-300, miR-2403, miR-181a-2-3p, miR-30a-3p, miR-1271-3p, miR-2284a, miR-192-3p, miR-3065-3p, miR-2284y, miR-380-5p, miR-205-5p, miR-1260a, novel\_127, miR-107, miR-127-5p, miR-3120-3p, miR-216b-3p, miR-320c, miR-374c-3p, miR-29a-3p, miR-18a-3p, miR-3065-

miR-450a-2-3p, miR-2898, miR-200c-3p, novel\_127, miR-205-5p, miR-1260a, miR-200c, miR-125a-3p, miR-219-3p, miR-199a-5p, miR-200a, novel\_39, miR-1957a, miR-376c-5p, miR-376b-5p, miR-3065-3p, miR-450c-5p, miR-2285b, miR-29b-2-5p, miR-2385-3p, miR-4286, miR-181a-2-3p, miR-411-3p, miR-200b-3p, let-7a-2-3p, miR-345-3p, miR-1290, miR-218-2-3p, miR-378h, miR-1271-5p, miR-450a-1-3p, miR-486-5p, novel\_121, miR-214-5p, miR-429-3p, miR-204-5p, miR-551b-3p, miR-3969, miR-323-3p, miR-500b-5p, miR-93, miR-1260b, miR-378c, miR-365a-5p, miR-374b, miR-1306-5p, miR-133a-3p, miR-876-3p, miR-10b-3p, miR-345-5p, let-7g-3p, miR-7144-5p, miR-20b-5p, miR-671-5p, miR-485-5p, miR-1248, miR-1814c, miR-488-3p, miR-93-5p, miR-17-5p, miR-362-5p, miR-3154, miR-34c-5p, miR-223-5p, miR-199a-5p, miR-574-5p, miR-3068-3p, miR-874-3p, miR-542-5p, miR-2355-5p, miR-3956, miR-378a-5p, miR-224-5p, miR-377-3p, miR-365b-5p, miR-106a-5p, novel\_51, miR-2411-3p, miR-17-5p, miR-2285r, let-7a-2-3p, miR-345-5p, miR-130b-5p, miR-668-3p, let-7f-2-3p, let-7f-2-3p, miR-1260b, miR-2284x, miR-188-5p, miR-873a-5p, miR-1434-3p, miR-1285, miR-3431, miR-185-5p, miR-20b, miR-2355-3p, miR-31-5p, miR-379-3p, miR-203b-5p, miR-656-5p, miR-6123, miR-502-5p, miR-20a-5p, miR-34c, miR-382-5p, miR-211, miR-323c, miR-449a, miR-199b-5p, miR-219b-3p, miR-342-3p, miR-2285x, miR-1291, miR-2319a, miR-6395, miR-378f, miR-2387, miR-378b, miR-18a-3p, miR-2404, miR-34b, miR-677, miR-669, miR-3074-5p, miR-106a, miR-202-5p, miR-466i-5p, miR-221-5p, miR-34b-5p, miR-2484, miR-21-3p, novel\_17, miR-345-3p, miR-422a, miR-664b-3p, miR-376a-5p, miR-125b-2-3p, miR-20a, miR-369-3p, miR-345-3p, miR-218-1-3p, miR-34a-5p, miR-378d, miR-361-5p, miR-378i, miR-1246, miR-376a-5p, miR-2366, miR-1197-5p, miR-140-3p, miR-378a-3p, miR-5703, miR-222-5p, miR-200b, novel\_83, miR-328-3p, miR-18a-3p, miR-106a, miR-novel\_111, miR-145-3p, let-7b-5p, miR-338-3p, let-7b, miR-136-3p, miR-103b, let-7f, miR-132-5p, let-7i, miR-377-3p, miR-411b-3p, miR-2483-3p, let-7d-5p, let-7i-5p, miR-4792, miR-320b, miR-542-5p, miR-1291, let-7e-5p, miR-2387, miR-148a-3p, miR-216a-3p, miR-432-3p, miR-432-3p, miR-8485, let-7g, let-7a-5p, miR-2898, miR-450a-2-3p, miR-98-5p, let-7f-5p, miR-30b-3p, let-7e, miR-152-3p, let-7k, miR-205-5p, miR-7-5p, miR-377-3p, let-7c-5p, miR-148b-3p, let-7g-5p, miR-26b-3p, let-7d, miR-128-3p, miR-2366, miR-7b-5p, miR-1961, miR-431-3p

miR-142-5p, miR-1a-3p, miR-329-3p, miR-362-3p, miR-8485, miR-16b, miR-199a-3p, miR-214-3p, miR-103a-2-5p, miR-199b-5p, miR-203-3p, miR-144-5p, miR-25, miR-499a-3p, miR-1983, miR-335-3p, miR-493-5p, miR-504, miR-9-5p, miR-6527, miR-363-3p, miR-1285-5p, miR-2440, novel\_82, miR-628-3p, miR-499a-5p, miR-3968, miR-380-5p, miR-18a-3p, miR-2284h-5p, miR-7859, miR-218-1-3p, miR-142-3p, miR-33b-3p, miR-329a-5p, miR-376c-3p, miR-181b-1-3p, miR-664b-3p, miR-376a-5p, miR-122-3p, miR-500a-5p, miR-618, miR-2285p, miR-210-5p, miR-30c-1-3p, miR-504-5p, miR-2331-3p, miR-151b, miR-15b-5p, miR-10a, miR-376e-3p, miR-655, miR-2285c, miR-1827, miR-339b, miR-214, miR-3184-3p, miR-142a-5p, miR-3604, miR-665, miR-664a-5p, miR-151-3p, miR-219b-3p, miR-2285j, miR-130b-5p, miR-129-5p, miR-339-5p, miR-103a-3p, miR-194-3p, miR-149-5p, miR-412-5p, miR-3535, miR-22-3p, miR-2113, miR-7b-5p, miR-542-3p, miR-223-3p, miR-188-5p, miR-2284x, miR-27b-3p, miR-497-5p, miR-26a-2-3p, miR-16b, miR-493-5p, miR-380-5p, miR-2284l, miR-2285r, miR-105-5p, miR-296-3p, miR-7-5p, miR-193a-3p, miR-106b-3p, miR-3120-3p, miR-216b-3p, miR-329-5p, novel\_68, miR-181b-3p, miR-144-3p, miR-669, miR-677, miR-374c-3p, miR-411b-3p, miR-3970, miR-148a-3p, miR-2319a, miR-412-3p, miR-758-5p, miR-193b-3p, miR-199b-5p, miR-374c-5p, novel\_87, miR-142b, miR-4324, miR-625-3p, miR-206, novel\_79, miR-412, miR-1224-5p, miR-6517, miR-486-5p, miR-134-5p, miR-2284z, miR-322-5p, miR-9-5p, miR-192-3p, miR-200a, miR-92b-3p, miR-219-3p, miR-152-3p, novel\_127, miR-200a-3p, miR-127-5p, miR-125a, miR-3956, miR-574-5p, miR-376c-3p, miR-25-3p, miR-300-3p, miR-331-5p, miR-424-3p, miR-1248, miR-329b, miR-329a, miR-144-5p, miR-16-5p, miR-1197-3p, miR-125b-5p, novel\_63, miR-134-5p, miR-ARFGEF1 ENSOARGOC ADP-ribo 27a-3p, miR-2300a-5p, miR-409b, miR-151a-3p, miR-2285e, miR-

miR-758-3p, miR-2310, miR-848b, miR-378d, miR-676-3p, miR-23a-3p, miR-127-3p, miR-101b-3p, miR-381-5p, miR-487b-5p, miR-29b-1-5p, miR-320b, miR-199a-3p, miR-2285e, miR-27a-3p, miR-222-5p, novel\_4, miR-105-1, miR-330-3p, miR-2300a-5p, miR-3120-5p, miR-450b-5p, miR-378c, miR-1388-5p, miR-758-3p, miR-125b-2-3p, miR-143-5p, miR-378b, miR-154a, miR-1285-5p, miR-452-5p, miR-181d-5p, miR-2285f, miR-3956-3p, novel\_60, miR-3958-3p, miR-4726-5p, miR-3968, miR-2440, miR-27a-3p, miR-454-5p, miR-2483-3p, miR-378e, miR-499a-3p, miR-7977, miR-211-5p, miR-374b-5p, miR-10b, miR-2319b, miR-1983, novel\_94, miR-335-3p, miR-381-3p, miR-409-5p, miR-361-3p, miR-143-3p, miR-2432, miR-125b-2-3p, miR-377-5p, miR-29b-1-5p, miR-195a-3p, miR-329a-5p, miR-216c-5p, miR-3653-3p, miR-320d, miR-202-5p, miR-92a-1-5p, miR-422a, miR-324-3p, miR-210-5p, miR-196a-3p, miR-199a-3p, miR-616-3p, miR-1247-5p, miR-148b-3p, miR-23c, miR-200b, miR-222-5p, miR-23b-3p, miR-7859, miR-548e-3p, miR-378d, miR-142-3p, miR-184-3p, miR-19b-3p, miR-4429, miR-140-3p, miR-378a-3p, miR-2904, miR-378i, miR-30c-5p, miR-6134, miR-6525, miR-145a-3p, miR-4510, miR-3074-5p, miR-378c, miR-590-3p, miR-208b-5p, miR-487b-5p, miR-665, miR-664a-5p, miR-6130, miR-216b-5p, miR-193b-3p, miR-376e-3p, miR-6516, miR-377-3p, miR-499b-3p, miR-296-3p, miR-532-5p, miR-552-3p, miR-216b-3p, miR-21-3p, miR-370-5p, miR-545-3p, miR-32-5p, miR-378a-3p, miR-1827, miR-625-5p, miR-411, miR-487b-5p, miR-30d-5p, miR-27b-5p, miR-2285c, miR-296-3p, miR-432-3p, miR-2285r, miR-6240, miR-193a-3p, miR-136-3p, novel\_51, miR-32, miR-105-5p, miR-330-3p, miR-296-3p, miR-377-3p, miR-149-5p, miR-2285g, miR-377-5p, miR-487b-3p, miR-188-5p, miR-27b-3p, miR-1260b, miR-381-5p, novel\_23, miR-2113, miR-2285m, miR-211, novel\_101, miR-495-3p, miR-1193, miR-193b-3p, miR-136-3p, miR-147-5p, miR-6119-3p, novel\_87, miR-

miR-3529-3p, miR-30a-3p, miR-380-5p, miR-195/a, miR-200c, miR-217, miR-200c-3p, miR-181b-5p, miR-7641, miR-483-3p, miR-378h, miR-582-3p, miR-545-5p, miR-345-3p, miR-134, miR-200b-3p, miR-105-2, let-7a-2-3p, miR-1306-5p, miR-6128, miR-103b, miR-500b-5p, miR-374a-3p, miR-145-3p, miR-378c, miR-5100, miR-331-3p, miR-3969, miR-31-3p, miR-410-3p, miR-374b-3p, miR-141-3p, miR-769, miR-2448-3p, miR-362-5p, miR-320a, miR-10b-3p, let-7g-3p, novel\_48, miR-130b-5p, miR-101-5p, miR-539-3p, miR-345-5p, miR-224-5p, miR-330-3p, miR-125a-5p, miR-133b-5p, miR-665, miR-26b-3p, miR-2284d, miR-2355-3p, miR-653, miR-181a-5p, miR-2284ab, miR-219b-3p, novel\_101, miR-495-3p, miR-323c, miR-3959-3p, miR-24-3p, miR-502-5p, miR-6402, miR-656-5p, miR-147-5p, miR-7-1-3p, miR-1291, miR-6516-3p, miR-216c-5p, miR-146a-5p, miR-196a-3p, miR-125b, miR-320d, miR-299-3p, miR-548e-3p, miR-3600, miR-485-3p, miR-487a-3p, miR-383-5p, miR-200b, miR-340-5p, miR-148b-3p, miR-151-5p, miR-199a-3p, miR-532-3p, miR-1246, miR-1197-5p, miR-5703, miR-188-3p, miR-4429, miR-378c, miR-539-5p, miR-2330-3p, miR-6516-3p, miR-487a-5p, miR-378a-3p, miR-21-3p, miR-182-5p, miR-532-5p, miR-27a-5p, miR-544-3p, miR-204-3p, novel\_25, miR-27b-5p, let-7g-3p, miR-382-3p, miR-1839-3p, let-7c-3p, miR-376b, miR-758-3p, miR-320b, miR-3955-3p, miR-105-1, novel\_4, miR-500-5p, miR-9788-3p, miR-216a-3p, miR-296-5p, miR-378b, miR-484, miR-125b-2-3p, miR-378c, miR-101a-5p, miR-544a, miR-2284aa, miR-3059-5p, novel\_60, miR-181d-5p, miR-362-5p, miR-382-3p, miR-769-5p, miR-335, miR-450a-5p, miR-2285t, miR-374a-3p, miR-664b, miR-378e, miR-129b-5p, novel\_94, miR-450b-5p, miR-148b-5p, miR-29a-5p, miR-2284y, novel\_39, miR-450c-5p, miR-664-3p, miR-30f, miR-28-3p, miR-127-5p, miR-152-3p, miR-200a-3p, miR-200a-3p, miR-129-3p, miR-758-5p, miR-2284z, miR-124-novel\_51, miR-330-3p, miR-377-3p, miR-214-3p, let-7e, miR-153-3p, miR-130b-3p, miR-196b-5p, miR-3085-3p, miR-491-5p, miR-376b, miR-668-3p, miR-6240, miR-1839-3p, miR-101b-3p, miR-130b-5p, let-7a-5p, miR-2310, let-7a-2-3p, miR-22-3p, miR-197-3p, miR-10b, miR-296-5p, miR-16-1-3p, miR-380-3p, miR-130a-3p, miR-5010-3p, miR-330-3p, miR-455-3p, let-7g-5p, miR-1298-3p, miR-153, novel\_87, let-7i, miR-769-5p, miR-2440, miR-2284q, miR-6119-3p, miR-1296-5p, miR-1839-3p, miR-2447, miR-877-3p, miR-211, miR-1306-3p, miR-3591-3p, miR-361-3p, miR-379-5p, let-7e-5p, miR-504, miR-10a-5p, miR-211-5p, miR-4792, miR-3064-5p, let-7d-5p, let-7c-5p, novel\_17, miR-8117, miR-6119-5p, miR-2285af, miR-21-3p, novel\_96, let-7k, miR-98-5p, let-7f-5p, miR-3064-5p, miR-380-3p, miR-143-3p, let-7g, miR-1957a, miR-130a-5p, miR-5703, miR-1434-5p, miR-1961, miR-215-5p, miR-196a-5p, miR-10a-5p, let-7a-2-3p, miR-16-1-3p, miR-142-3p, let-7d, miR-6517, miR-129-1-3p, miR-6516-5p, miR-383-5p, miR-3604, miR-1306-3p, let-7f, miR-204-5p, miR-130b-5p, miR-487a-5p, miR-208b-5p, miR-31-3p, novel\_9, miR-214, miR-3074-2-3p, miR-129-2-3p, let-7b, miR-539-5p, let-7b-5p, miR-10b-5p, miR-769-5p, miR-6525, miR-200a-5p, miR-1814c, let-7g-3p, let-7g-3p, miR-215-5p, miR-21-3p, miR-504-5p, let-7i-5p, miR-204-3p, miR-22-3p, miR-769, miR-192-5p, miR-10a, miR-6516, miR-377-3p

miR-365a-5p, miR-2284w, miR-3184-3p, miR-103b, miR-9-5p, miR-495-3p, miR-452-5p, miR-208b-5p, novel\_82, miR-371a-5p, miR-382-5p, miR-544-3p, miR-154b-5p, miR-2355-5p, miR-296-3p, miR-625-5p, miR-544-5p, miR-3065-5p, miR-200a, miR-146a-5p, let-7j, miR-2424, miR-4286, miR-450a-2-3p, miR-200c-3p, miR-452-5p, miR-2484, miR-200c, miR-146a, miR-365b-5p, miR-505, miR-505-5p, miR-9-5p, miR-429-3p, miR-145b, miR-544a, novel\_73, miR-21b, miR-16-2-3p, miR-873a-5p, miR-125b-2-3p, miR-145a-5p

miR-371b-3p, miR-2428, miR-3607-3p, miR-29c-3p, miR-138-5p, miR-29a, miR-29b-3p, miR-331-3p, miR-1973, miR-29a-3p, miR-4443, novel\_68, miR-30c-1-3p, miR-4792, miR-10b, miR-19a-3p, miR-30e-5p, miR-137-3p, miR-30d-5p, miR-30c-1-3p, miR-432-3p, novel\_39, miR-127-3p, miR-363-5p, miR-2483-5p, miR-491-5p, miR-2898, miR-30d, novel\_96, miR-30f, miR-30c-2-3p, miR-2331-5p, miR-149-5p, miR-3960, miR-138, miR-29b, miR-19b-3p, miR-218-1-3p, miR-29d-3p, miR-5703, miR-30a-5p, miR-1193, miR-181b-1-3p, miR-664b-3p, miR-376a-5p, miR-380-3p, miR-2424, miR-486-3p, miR-2432, miR-2285w, miR-466i-5p, miR-202-5p, miR-34b-5p, miR-221-5p, miR-208b-3p, miR-2285p, miR-92a-1-5p, miR-487a-3p, miR-2284h-5p, miR-3600, miR-1b-3p, novel\_73, miR-142-3p, miR-378d, miR-34a-5p, miR-218-1-3p, miR-362-3p, miR-1246, miR-140-3p, miR-1197-5p, miR-346, miR-10b-5p, miR-338-3p, miR-539-5p, miR-3074-2-3p, miR-214, miR-17-3p, miR-664a, miR-320e, miR-10a, miR-582-5p, miR-877-5p, novel\_32, miR-660-5p, miR-140-5p, miR-221-5p, miR-32-5p, miR-2331-3p, miR-345-5p, miR-339b, let-7g-3p, miR-1895, miR-2285c, miR-3613-5p, miR-129b-3p, miR-2310, miR-3955-3p, miR-214-3p, miR-362-3p, miR-147a, miR-2285e, miR-500-5p, miR-409b, miR-199b-3p, miR-181b-2-3p, miR-222-5p, miR-362-3p, miR-3120-5p, miR-1839-5p, miR-10b, miR-1298-5p, miR-329-3p, miR-7857, miR-362-5p, miR-194b-5p, miR-9-5p, miR-490-5p, miR-2440, novel\_82, miR-371a-5p, miR-2285y, miR-25, miR-4443, miR-454-5p, miR-203-3p, miR-452-3p, miR-211-5p, miR-499b-5p, miR-493-5p, miR-361-3p, miR-140-5p, miR-129b-5p, miR-148b-5p, miR-92b-3p, miR-29a-5p, novel\_39, miR-1957a, miR-2284f, miR-127-5p, miR-17-3p, miR-2898, miR-92a-3p, miR-125a-3p, miR-2285af, miR-1260a, miR-339a, miR-3071-3p, miR-9-5p, miR-582-3p, miR-2285ad, novel\_79, miR-411-3p, miR-10a-5p, let-7a-2-3p, miR-1290, miR-29d-3p, miR-1260b, miR-500b-5p, miR-193a-5p, miR-6128, miR-486b-3p, miR-204-5p, miR-5100, miR-29b-3p, miR-2284k, miR-135a-5p, miR-100-3p, miR-331-3p, miR-25-3p, miR-365a-3p, miR-34c-5p, miR-331-5p, miR-2284n, miR-223-5p, miR-2355-5p, miR-345-5p, miR-329a, let-7g-3p, miR-876-3p, miR-1814c, miR-7144-5p, miR-362-5p, miR-200a-5p, miR-345-5p, let-7a-2-3p, miR-6412, miR-296-3p, miR-493-5p, miR-378a-5p, miR-660, miR-452-5p, miR-296-3p, miR-455-5p, miR-104a, novel\_51, miR-32, miR-2285a, miR-129-

SERPINI1 ENSOARGO( serpin p

TNXB ENSOARGO( tenascin

STAR ENSOARGO( steroido



novel\_69, miR-320c, miR-144-3p, miR-18a-3p, miR-150-5p, miR-19a-3p, miR-6395, miR-146b-5p, novel\_120, miR-1839-3p, miR-1307-3p, miR-211, miR-2285m, miR-6402, miR-142b, miR-133a-5p, miR-576-3p, novel\_1, miR-147-5p, miR-22-5p, miR-656-5p, miR-31-5p, miR-187-3p, miR-26b-3p, miR-185-5p, miR-432-5p, miR-2284d, miR-1285, miR-542-3p, miR-7b-5p, miR-1434-3p, miR-432, miR-708-3p, miR-19b-2-5p, miR-653, novel\_23, miR-22-3p, miR-197-3p, miR-1260b, miR-2284ab, miR-4508, miR-101-5p, let-7j, miR-146a, miR-7-5p, miR-466f-3p, miR-574-5p, miR-1271, miR-370-3p, miR-3965, miR-2284n, miR-320a, miR-671-5p, miR-485-5p, miR-7144-5p, miR-3074-1-3p, miR-190a-3p, miR-2284v, miR-1260b, miR-2284k, miR-2433, miR-34c-3p, miR-144, miR-204-5p, miR-134-5p, miR-410-3p, miR-429-3p, miR-2285ad, novel\_121, miR-134-5p, miR-2284z, miR-134, miR-200b-3p, miR-3529-3p, miR-4286, miR-192-3p, miR-3065-3p, miR-200c, miR-1260a, miR-205-5p, miR-30f, miR-200c-3p, miR-450a-2-3p, novel\_127, miR-20a-3p, miR-211-5p, miR-499b-5p, miR-2483-3p, novel\_94, miR-541-3p, miR-4454, miR-3059-5p, miR-2284j, miR-2285n, miR-2285y, miR-628-3p, miR-151a-3p, miR-1343-3p, miR-541, miR-484, miR-758-3p, miR-7857, miR-450b-5p, miR-2284aa, miR-2330-5p, miR-1839-3p, miR-494-3p, miR-101b-3p, miR-652-5p, miR-33a-5p, miR-23a-3p, miR-758-3p, miR-8485, miR-320b, novel\_124, miR-146b, miR-3065-3p, miR-22-3p, novel\_25, miR-21a-3p, miR-539-5p, miR-6525, miR-338-5p, miR-151-3p, miR-19b-1-5p, miR-6516-3p, miR-208b-5p, miR-548e-3p, miR-18a-3p, miR-200b, miR-23c, miR-23b-3p, miR-7859, miR-328-3p, miR-2284h-5p, miR-2366, novel\_133, miR-1197-5p, miR-19b-3p, miR-4429, miR-361-5p, miR-378d, miR-2285w, miR-216c-5p, miR-143-3p, miR-146a-5p, miR-2432, miR-2285p, miR-92a-1-5p, miR-500a-5p, miR-2284m, miR-320d, miR-202-5p, miR-30b-3p, miR-3653-3p, miR-1977-5p, miR-3959-3p, miR-363-3p, miR-539-5p, miR-487b-5p, miR-92a-3p, miR-4324, miR-33a-3p, novel\_87, miR-655-3p, miR-125b-5p, miR-19b-1-5p, miR-371a-5p, miR-365a-3p, miR-25-3p, miR-146b-3p, novel\_25, miR-32-5p, novel\_68, miR-125a, miR-6395, miR-2448-3p, miR-381-3p, miR-488-3p, miR-378b, miR-655, miR-150-5p, miR-380-5p, miR-92b-3p, miR-376a-5p, miR-148b-5p, miR-143-3p, miR-3187-3p, miR-539-3p, miR-380-5p, miR-369-3p, miR-195a-3p, miR-196b-5p, miR-92a-3p, miR-466f-3p, miR-125a-5p, miR-374a-5p, miR-125b, miR-32, miR-500a-5p, miR-758-5p, miR-421, miR-328-3p, miR-532-3p, miR-485-3p, miR-26b-3p, miR-3600, miR-219a-1-3p, miR-16-1-3p, miR-16-1-3p, miR-196a-5p, miR-19b-2-5p, miR-1193, miR-188-3p, miR-1434-5p, miR-218-2-3p

|         |                     |                                                                                                                                                                                                                                                                                                                                                                                                                                                                                                                                                                                                                                                                                                                                                                                                            |
|---------|---------------------|------------------------------------------------------------------------------------------------------------------------------------------------------------------------------------------------------------------------------------------------------------------------------------------------------------------------------------------------------------------------------------------------------------------------------------------------------------------------------------------------------------------------------------------------------------------------------------------------------------------------------------------------------------------------------------------------------------------------------------------------------------------------------------------------------------|
|         |                     | miR-376a-2-5p, miR-195a-5p, miR-2319a, miR-2483-3p, miR-2319b, miR-139-5p, novel_1, miR-2285t, miR-15a, miR-382-3p, miR-382-5p, miR-33a-3p, miR-485-3p, miR-16a, miR-2285y, miR-2428, miR-2284w, miR-1193, miR-380-3p, miR-16b, miR-497-5p, miR-1434-3p, miR-653, miR-323b, miR-412-5p, novel_116, miR-26b-3p, miR-491-5p, miR-199a-3p, miR-16b, miR-323b-3p, miR-1b-5p, miR-424-5p, miR-130b-5p, let-7c-3p, miR-582-5p, miR-200a-5p, miR-139-5p, miR-582-5p, miR-15b-5p, miR-370-5p, miR-664a, miR-130b-5p, miR-424-5p, miR-370-5p, miR-338-5p, miR-6525, miR-590-3p, miR-16-5p, miR-200b-3p, miR-15a-5p, miR-200b, miR-222-5p, miR-322-5p, miR-2284z, miR-199a-3p, miR-429-3p, miR-548e-3p, miR-2285ad, miR-376a-5p, miR-485-3p, miR-200c-3p, novel_96, miR-200c, miR-125b-2-3p, miR-380-3p, miR-2385-3p |
| PEX13   | ENSOARGO(peroxisom) | miR-767-5p, miR-2285t, miR-2284q, miR-34c-3p, miR-3969, miR-378c, miR-1285-5p, miR-7705, miR-378c, miR-767, miR-329b, miR-107, miR-9851-3p, miR-378f, miR-216a-3p, miR-378e, miR-377-3p, miR-365a-3p, miR-27a-3p, miR-454-5p, miR-378a-3p, miR-378b, miR-329-5p, miR-216b-3p, miR-20a-3p, miR-107, miR-2285af, miR-377-3p, miR-422a, miR-378d, miR-329a-5p, miR-378c, miR-128-3p, miR-1839-5p, miR-27b-3p, miR-378i, miR-873a-5p, miR-378b, novel_23, miR-3071-5p, miR-378a-3p, miR-378h, miR-545-5p, miR-103, miR-103a-3p, miR-27a-3p                                                                                                                                                                                                                                                                     |
| GJE1    | ENSOARGO(gap_junc)  | miR-1343-5p, miR-450a-2-3p, miR-2285v, miR-182-5p, miR-582, miR-3187-3p, novel_39, miR-486-3p, miR-490-3p, miR-432-3p, miR-4286, miR-582-3p, miR-1343-5p, miR-145a-5p, miR-2300b-3p, miR-1843b-5p, miR-541, miR-151-5p, miR-147a, miR-145b, miR-31-5p, miR-486b-3p, novel_82, miR-2440, miR-6527, miR-541-3p, miR-329b, miR-129b-5p, miR-151b, miR-3082-5p, miR-3956, miR-182-5p                                                                                                                                                                                                                                                                                                                                                                                                                           |
| GPIHBP1 | ENSOARGO(glycosyl)  |                                                                                                                                                                                                                                                                                                                                                                                                                                                                                                                                                                                                                                                                                                                                                                                                            |

miR-4492, miR-190a-5p, miR-665, miR-2285j, miR-122-5p, miR-3958-5p, miR-1895, miR-339b, miR-129b-3p, miR-151b, miR-15b-5p, miR-10a, miR-216b-3p, miR-30c-1-3p, miR-504-5p, miR-3653-3p, miR-99a-3p, miR-219b-5p, miR-324-3p, miR-422a, novel\_17, miR-210-5p, miR-486-3p, miR-377-5p, miR-2285w, miR-493-3p, miR-184-3p, miR-378a-3p, miR-378i, miR-2284h-5p, miR-328-3p, miR-499a-5p, miR-3968, novel\_82, miR-361-3p, miR-6527, miR-190b-5p, miR-544-5p, miR-1983, miR-504, miR-2285u, miR-211-5p, miR-4792, miR-146b, miR-199b-5p, miR-491-5p, miR-505, miR-16b, miR-8485, miR-378d, miR-1388-3p, miR-101c, miR-1839-5p, miR-362-3p, miR-1388-5p, miR-329-3p, miR-541, miR-2459, novel\_78, miR-331-5p, miR-100-3p, miR-125b-5p, miR-6740-5p, miR-1260b, miR-16-5p, miR-329b, miR-329a, miR-331-5p, miR-99a-3p, miR-125a, miR-574-5p, miR-874-3p, novel\_96, miR-127-5p, miR-664-3p, novel\_39, miR-148b-5p, miR-450b-5p, miR-3064-5p, miR-1343-5p, miR-23b-5p, miR-505-5p, miR-322-5p, novel\_79, miR-299a-3p, miR-429-3p, miR-6123, miR-199b-5p, miR-193b-3p, miR-146b-5p, miR-378f, miR-410-5p, miR-412-3p, miR-1306, miR-3970, miR-150-5p, miR-216a-3p, miR-374c-3p, miR-299b-3p, miR-193a-3p, miR-378a-5p, miR-105-5p, novel\_51, miR-146a, miR-2285r, miR-668-3p, miR-497-5p, miR-16b, miR-432, miR-542-3p, miR-1843b-5p, miR-194-3p, miR-149-5p, miR-3535, miR-3431, miR-339-5p, miR-340-3p, miR-31-5p, miR-708-5p, miR-424-5p, miR-664a, miR-324-3p, miR-132-5p, miR-320e, miR-10b-5p, miR-2330-3p, miR-378c, novel\_99, miR-2312, miR-323-5p, miR-193b-3p, miR-3065-3p, miR-370-5p, miR-532-5p, miR-221-5p, miR-378a-3p, miR-221-5p, miR-299-3p, miR-466i-5p, miR-125b, miR-2411, miR-146a-5p, miR-216c-5p, miR-378d, miR-2904, miR-5703, novel\_133, miR-2300b-3p, miR-362-3p, miR-532-3p, novel\_83, miR-151-5p, miR-15a-5p, miR-200b, miR-1b-3p, miR-1726-5p, miR-382-3p, miR-5126, miR-432, miR-25-5p, miR-491-5p, miR-486b-3p, novel\_96, miR-432-5p, miR-4443, miR-423-5p, novel\_39, miR-486-3p, miR-3184-5p, miR-669

LY6H

ENSOARG0C lymphocy

NDEL1

ENSOARG0C nudE neu

miR-3184-3p, miR-425-5p, miR-133a-3p, miR-3074-2-3p, miR-103b, miR-374a-3p, miR-10b-5p, miR-145-3p, miR-135a-1-3p, miR-5100, miR-15b-3p, novel\_63, miR-3604, miR-219b-3p, miR-487b-5p, miR-138-5p, miR-130b-5p, miR-374b-3p, miR-410-3p, miR-216b-3p, miR-10a, miR-376e-3p, miR-377-3p, miR-6516, miR-499b-3p, miR-376c-3p, miR-299, miR-376c-5p, miR-3154, miR-345-5p, miR-345-5p, miR-133b-3p, novel\_99, miR-1248, miR-625-5p, miR-376c-5p, miR-23a-5p, miR-376c-3p, miR-125b-2-3p, miR-2284y, miR-219-3p, miR-210-5p, miR-205-5p, miR-217, miR-219b-5p, miR-216a-5p, miR-127-5p, miR-181b-5p, miR-152-3p, miR-107, miR-2285ad, miR-148b-3p, miR-6516-5p, novel\_121, miR-2284z, miR-1290, miR-376a-5p, miR-126-3p, miR-217-5p, miR-218-2-3p, miR-582-3p, miR-2284u, miR-10a-5p, miR-136-3p, miR-342-3p, miR-135a-2-3p, miR-181d-5p, miR-219a-2-3p, miR-2428, miR-6402, novel\_87, miR-33a-3p, miR-371a-5p, miR-2285y, novel\_1, miR-6119-3p, miR-147-5p, miR-374a-3p, miR-2284g, miR-10a-5p, miR-670-3p, miR-411b-3p, miR-499a-3p, miR-6535, miR-148a-3p, miR-376b-5p, miR-107, miR-299b-5p, miR-1291, novel\_94, miR-1388-3p, miR-130b-5p, miR-668-3p, miR-101-5p, miR-345-5p, miR-377-3p, miR-342, miR-136-3p, miR-153-3p, miR-548w, miR-103a-3p, miR-153, miR-126a-5p, miR-103, miR-194-3p, miR-10b, miR-181a-5p, miR-143-5p, miR-125b-2-3p, novel\_23, miR-101a-5p, miR-299a-5p, miR-2426, miR-138, miR-21b, miR-2284aa

ATP6AP2 ENSOARGO( ATPase,

miR-5010-3p, miR-27a-3p, miR-145b, novel\_4, miR-330-3p, miR-1343-3p, miR-500-5p, miR-9788-3p, miR-7857, miR-2284r, miR-296-5p, miR-541, miR-10b, miR-1298-5p, miR-301b-5p, miR-21b, miR-544a, miR-127-3p, miR-2330-5p, miR-505, miR-2957, miR-1306-5p, miR-431-5p, miR-214-3p, miR-381-5p, miR-491-5p, miR-3085-3p, miR-7689-3p, miR-7977, miR-4792, miR-139-5p, miR-3064-5p, miR-2319b, miR-452-3p, miR-652-3p, miR-27a-3p, miR-4443, miR-3596, miR-378g, miR-3082-5p, miR-489, miR-361-3p, novel\_94, miR-1983, miR-2285f, miR-2447, miR-541-3p, miR-219a-2-3p, miR-362-5p, miR-2285y, miR-301a-5p, novel\_82, miR-30b-5p, miR-3968, miR-335, miR-1b-3p, miR-18a-3p, miR-548e-3p, miR-2284h-5p, miR-7859, miR-1197-5p, miR-30c-5p, miR-2366, miR-193b-5p, miR-664-5p, miR-133a-3p, miR-941, miR-142-3p, miR-345-3p, miR-125b-2-3p, miR-377-5p, miR-324-3p, miR-125b, miR-345-3p, miR-92a-1-5p, miR-30b, miR-210-5p, miR-30d, miR-202-5p, miR-760-3p, miR-296-3p, miR-2331-3p, miR-22-3p, novel\_32, miR-204-3p, miR-544-3p, miR-10a, miR-2284s, miR-139-5p, miR-6130, miR-129b-3p, miR-30d-5p, miR-450a-1-3p, miR-625-5p, miR-2312, miR-339b, miR-30f, miR-345-5p, miR-3074-2-3p, miR-214, miR-4510, miR-10b-5p, miR-224-5p, miR-219b-3p, miR-324-3p, miR-664a-5p, miR-665, miR-874-5p, miR-130b-5p, miR-450b-3p, miR-664a, miR-339-5p, miR-665, miR-377-5p, miR-149-5p, miR-544b, miR-432-5p, miR-185-5p, miR-134-3p, miR-3431, miR-450c-3p, miR-22-3p, miR-374b-3p, novel\_23, miR-145a-5p, miR-432, miR-873a-5p, miR-1843b-5p, miR-1285, miR-542-3p, miR-223-3p, miR-1434-3p, miR-4508, miR-26a-2-3p, miR-744-5p, miR-2889, miR-27b-3p, miR-138, miR-1260b, miR-381-5p, miR-363-5p, miR-130b-5p, miR-6240, miR-296-3p, miR-345-5p, miR-2285r, miR-432-3p, miR-330-3p, miR-2285v, novel\_51, miR-2411-3p, miR-224-5p, miR-296-3p, miR-125a-5p, miR-483-3p, miR-196b-5p, miR-378a-5p, miR-

miR-101b-3p, miR-382-3p, miR-1388-3p, miR-652-5p, miR-33a-5p, miR-23a-3p, miR-326, miR-1306-5p, miR-199a-3p, miR-505, miR-3955-3p, miR-130b-3p, miR-214-3p, miR-199b-3p, novel\_78, miR-151a-3p, miR-1343-3p, miR-222-5p, miR-181b-2-3p, miR-27a-3p, miR-1298-3p, miR-142-3p, miR-500-5p, miR-301b-5p, miR-484, miR-296-5p, miR-30b-3p, miR-3962, miR-1a-3p, miR-1388-5p, miR-21b, miR-2284aa, miR-32-3p, novel\_111, miR-361-3p, miR-362-5p, miR-218-5p, miR-301a-5p, miR-2285t, miR-20a-3p, miR-139-5p, miR-664b, miR-7977, miR-489, miR-3082-5p, miR-25, miR-7857-3p, miR-27a-3p, miR-203-3p, miR-129b-5p, miR-381-3p, miR-136-5p, miR-345-3p, miR-195a-3p, miR-181b-1-3p, miR-376c-3p, miR-142a-3p, miR-130a-5p, miR-376a-5p, miR-380-3p, miR-143-3p, miR-2424, miR-125b, miR-122-3p, miR-500a-5p, miR-760-3p, miR-2284m, miR-34b-5p, miR-30d-3p, miR-3600, miR-222-5p, miR-148b-3p, miR-23b-3p, miR-532-3p, miR-199a-3p, miR-1246, miR-19b-3p, miR-34a-5p, miR-539-5p, miR-590-3p, miR-3074-2-3p, miR-214, miR-206-3p, miR-346, miR-6525, miR-338-3p, miR-30e-3p, miR-2285j, miR-29b-2-5p, miR-151-3p, miR-19b-1-5p, miR-30a-3p, miR-6516-3p, miR-17-3p, miR-664a, miR-450b-3p, miR-130b-5p, miR-454-3p, miR-500, miR-874-5p, miR-1468-5p, miR-32-3p, miR-2331-3p, miR-139-5p, miR-27a-5p, miR-301a-3p, miR-582-5p, miR-450a-1-3p, miR-21a-3p, miR-433-3p, miR-129b-3p, miR-500a-3p, miR-345-5p, miR-582-5p, miR-186-5p, miR-380-5p, miR-130b-5p, miR-345-5p, miR-466f-3p, miR-125a-5p, miR-452-5p, miR-122-3p, miR-31-5p, miR-26b-3p, miR-665, miR-130a-3p, miR-185-5p, miR-2284d, miR-411-5p, novel\_116, miR-19b-2-5p, miR-374b-3p, miR-3071-5p, miR-450c-3p, miR-30b-3p, miR-380-3p, miR-2284ab, miR-7862, miR-27b-3p, novel\_120, miR-2285x, miR-17-3p, miR-495-3p, miR-24-3p, miR-301b-3p, miR-2428, miR-2284w, miR-449a, miR-326-3p, miR-1324, miR-382-5p, miR-34c, miR-206, miR-502b, miR-

MDM1

ENSOARGO(Mdm1 nuc

miR-7977, miR-452-3p, miR-3064-5p, miR-489, miR-361-3p, novel\_94, miR-181d-5p, miR-107-5p, miR-371a-5p, miR-769-5p, miR-30b-5p, miR-2284q, miR-2285t, miR-5010-3p, novel\_4, miR-2300a-5p, miR-9788-3p, miR-216a-3p, miR-3962, miR-30b-3p, miR-6529a, miR-484, miR-3120-5p, miR-2284aa, miR-450b-5p, miR-2426, miR-2330-5p, miR-382-3p, miR-2957, miR-326, miR-3955-3p, miR-3085-3p, novel\_124, miR-3065-3p, miR-545-3p, miR-155-5p, miR-22-3p, novel\_32, novel\_25, miR-193b-3p, miR-323-5p, miR-6130, novel\_99, miR-30f, miR-3074-2-3p, miR-145a-3p, miR-4510, miR-6134, miR-320e, miR-132-5p, miR-708-5p, miR-6516-3p, miR-155-5p, miR-664a, miR-450b-3p, novel\_83, miR-532-3p, miR-616-3p, miR-1197-5p, miR-140-3p, miR-188-3p, miR-2904, miR-2300b-3p, miR-378d, miR-2887, miR-216c-5p, miR-183-5p, miR-125b-2-3p, miR-185-3p, miR-125b, miR-21-3p, miR-30b-3p, miR-30d, miR-34b-5p, miR-760-3p, miR-320b, miR-670-3p, miR-34b, miR-29a-3p, miR-323a-5p, miR-2404, miR-18a-3p, miR-2387, miR-6395, miR-7975, miR-450b-3p, novel\_101, miR-2428, miR-326-3p, miR-449a, miR-24-3p, miR-34c, miR-6529b, miR-6402, miR-133b-5p, miR-187-3p, miR-503-5p, miR-185-5p, miR-432-5p, miR-1434-3p, miR-181a-5p, miR-873a-5p, miR-744-5p, miR-2889, miR-6239, miR-7862, miR-125b-1-3p, miR-29b, miR-30b-3p, miR-363-5p, miR-345-5p, miR-224-5p, miR-503-5p, miR-125a-5p, miR-452-5p, miR-1343-5p, miR-370-3p, miR-154b-5p, miR-365a-3p, miR-769, miR-34c-5p, miR-3154, miR-381-3p, miR-485-5p, miR-7144-5p, miR-10b-3p, miR-331-3p, miR-29b-3p, miR-410-5p, miR-28-5p, miR-214-5p, miR-582-3p, miR-30a-5p, miR-29d-3p, miR-3578, miR-128-3p, miR-300, miR-4286, miR-30a-3p, miR-490-3p, miR-1271-3p, miR-3065-3p, miR-6119-5p, miR-543-5p, miR-181b-5p, miR-2898, miR-4792, miR-4443, miR-203-3p, miR-378g, miR-25, miR-378j, miR-409-5p, miR-504, miR-6527, miR-7705, novel\_111, miR-361-3p, miR-4510, miR-129-2-3p, miR-6130, novel\_39, miR-129-1-3p, miR-873a-5p, miR-542-3p, miR-2889

CHI3L1 ENSOARGO(chitinase) miR-615, miR-615-3p, miR-1197-3p

PSMG4 ENSOARGO(proteasome) miR-615, miR-615-3p, miR-1197-3p

NAPG ENSOARGO(N-ethylmaleimide) miR-615, miR-615-3p, miR-1197-3p

novel\_17, miR-185-3p, miR-125b, miR-122-3p, miR-92a-1-5p, miR-422a, miR-324-3p, miR-760-3p, miR-466i-5p, miR-21-3p, miR-221-5p, miR-30b-3p, miR-10a-3p, miR-345-3p, miR-377-5p, miR-181b-1-3p, miR-2432, miR-193b-5p, miR-1246, miR-2366, novel\_133, miR-378i, miR-378a-3p, miR-5703, miR-188-3p, miR-2904, miR-19b-3p, miR-361-5p, miR-378d, miR-133a-3p, miR-18a-3p, miR-212-5p, miR-132-5p, miR-6516-3p, miR-17-3p, miR-487b-5p, miR-450b-3p, miR-874-5p, miR-4492, miR-708-5p, miR-378c, miR-6525, miR-769-5p, miR-338-3p, miR-6134, miR-3184-5p, miR-450a-1-3p, miR-21a-3p, miR-345-5p, novel\_99, miR-186-5p, miR-1827, miR-1895, miR-885-3p, miR-504-5p, miR-140-5p, miR-221-5p, miR-378a-3p, miR-296-3p, miR-3065-3p, miR-370-5p, miR-216b-3p, miR-544-3p, miR-2284s, miR-22-3p, novel\_25, miR-204-3p, miR-1306-5p, miR-5126, miR-326, miR-323b-3p, miR-487b-5p, miR-25-5p, miR-3085-3p, miR-199b-5p, miR-33a-5p, miR-676-3p, miR-378d, miR-484, miR-378b, miR-30b-3p, miR-7857, miR-323b, miR-544a, miR-378c, miR-3120-5p, miR-16-2-3p, miR-105-1, miR-409b, novel\_78, miR-181b-2-3p, miR-455-3p, miR-9788-3p, miR-769-5p, miR-490-5p, miR-2447, miR-423-5p, miR-199b-5p, miR-140-5p, miR-361-3p, miR-378j, miR-504, miR-9-3p, miR-452-3p, miR-3064-5p, miR-211-5p, miR-7689-3p, miR-25, miR-378e, miR-378g, miR-4443, miR-125a-3p, miR-1260a, miR-450a-2-3p, miR-17-3p, miR-2898, novel\_127, miR-3064-5p, miR-192-3p, miR-3065-3p, miR-199a-5p, miR-134, miR-330-5p, miR-1343-5p, miR-885-3p, miR-105-2, miR-6517, miR-2285ad, miR-378h, miR-505-5p, miR-450a-1-3p, miR-134-5p, miR-370-5p, miR-2433, miR-3969, miR-331-3p, miR-125b-5p, miR-6740-5p, miR-138-5p, miR-204-5p, miR-134-5p, miR-28-5p, miR-31-3p, novel\_42, miR-103b, miR-1260b, miR-1197-3p, miR-378c, miR-488-3p, miR-345-5p, miR-876-3p, miR-10a-3p, miR-671-5p, miR-7144-5p, miR-3074-1-3p, miR-615-



miR-365a-3p, miR-199a-5p, miR-574-5p, miR-1271, miR-3956, miR-370-3p, miR-2285aa, miR-671-5p, miR-331-5p, miR-301, miR-320a, miR-374b, miR-16-5p, miR-331-5p, miR-486b-3p, miR-592, miR-5100, miR-409-3p, miR-144, miR-322-5p, novel\_121, miR-2284z, miR-545-5p, miR-222, miR-411-3p, miR-128-3p, miR-345-3p, miR-330-5p, miR-501-3p, miR-23b-5p, miR-7134-5p, miR-450c-5p, miR-199a-5p, miR-29a-5p, miR-3065-3p, miR-181b-5p, miR-107, miR-8117, miR-2285af, miR-670-3p, miR-323a-5p, miR-181b-3p, miR-144-3p, miR-320c, miR-6535, miR-677, miR-107, miR-195a-5p, miR-216a-3p, miR-199b-5p, miR-2284w, miR-326-3p, novel\_1, miR-379-3p, miR-199c, miR-133a-5p, miR-15a, miR-4324, miR-16a, miR-103, miR-103a-3p, miR-125b-1-3p, miR-16b, miR-497-5p, miR-181a-5p, miR-194-5p, miR-145a-5p, miR-197-3p, let-7j, miR-6240, miR-628-5p, miR-2483-5p, miR-452-5p, miR-194a, novel\_51, miR-2411-3p, miR-330-3p, miR-197-5p, miR-323-5p, miR-15b-5p, miR-532-5p, miR-3065-3p, miR-543-3p, miR-625-5p, miR-1895, miR-21a-3p, miR-411, miR-500a-3p, miR-129b-3p, miR-181c-5p, miR-6134, miR-3184-5p, miR-665-5p, miR-424-5p, miR-500, miR-222-3p, miR-665, miR-15a-5p, miR-7859, miR-548e-3p, miR-212-5p, miR-4429, miR-181b-1-3p, miR-29b-1-5p, miR-486-3p, miR-345-3p, miR-466i-5p, miR-320d, miR-21-3p, miR-1277-5p, miR-3653-3p, miR-374a-5p, miR-345-3p, miR-3596, miR-500-3p, miR-652-3p, miR-20a-3p, miR-374b-5p, miR-499b-5p, miR-199b-5p, miR-409-5p, miR-221, miR-877-3p, miR-361-3p, miR-502-3p, miR-423-5p, miR-212-3p, miR-3059-5p, miR-181d-5p, miR-194b-5p, miR-450a-5p, miR-4726-5p, miR-221-3p, miR-455-3p, miR-216a-3p, miR-199b-3p, miR-1343-3p, miR-2300a-5p, miR-330-3p, miR-145b, miR-181b-2-3p, miR-5010-3p, miR-450b-5p, miR-2284aa, miR-1839-5p, miR-6529a, miR-125b-2-3p, miR-501-3p, miR-2310, miR-3187-3p, miR-424-5p, miR-101b-3p, miR-382-3p, miR-3955-3p, novel\_124, miR-100b-5p, miR-146b, miR-146b-5p, miR-136-5p, miR-132-5p, miR-5100, miR-146a, miR-877-5p, miR-8485, miR-7859, miR-548e-3p, miR-1306-5p

ACVR2B ENSOARGO(activin

YLPM1 ENSOARGO(YLP moti

miR-6134, miR-145-3p, miR-16-5p, miR-4510, miR-28-5p, miR-486b-3p, miR-708-5p, miR-4492, miR-424-5p, miR-331-3p, miR-2332, miR-15b-5p, miR-199a-5p, miR-6130, miR-374c-3p, miR-874-3p, miR-221-5p, novel\_99, miR-329b, miR-320a, miR-3154, miR-2285b, miR-490-3p, miR-486-3p, miR-199a-5p, miR-28b, miR-4286, miR-183-5p, novel\_96, novel\_127, miR-21-3p, miR-152-3p, miR-221-5p, miR-450a-2-3p, miR-345-3p, miR-185-3p, miR-324-3p, miR-26a-5p, miR-532-3p, miR-199a-3p, miR-15a-5p, miR-148b-3p, miR-505-5p, miR-322-5p, miR-302a-5p, miR-18a-3p, miR-378d, miR-4429, miR-5703, miR-1343-5p, miR-2904, miR-2366, miR-345-3p, miR-7705, miR-199b-5p, miR-2428, miR-3957-3p, miR-541-3p, miR-3059-5p, miR-342-3p, miR-490-5p, miR-3968, miR-16a, miR-28c, miR-15a, miR-6535, miR-374c-3p, miR-3082-5p, miR-2404, miR-378g, miR-26b-5p, miR-2319b, miR-9-3p, miR-195a-5p, miR-18a-3p, miR-148a-3p, miR-199b-5p, miR-3187-3p, miR-432-3p, miR-2284l, miR-432-3p, miR-33a-5p, miR-2483-5p, miR-382, miR-2330-5p, miR-424-5p, miR-2285o, miR-199b-5p, miR-1343-5p, miR-2285l, miR-3955-3p, miR-491-5p, miR-124-5p, miR-2411-3p, miR-16b, novel\_115, miR-320b, miR-199a-3p, miR-342, miR-9788-3p, miR-216a-3p, miR-455-3p, miR-134-3p, miR-432-5p, miR-31-5p, miR-497-5p, miR-219a-1-3p, miR-30b-3p, miR-16b, miR-374b-3p, miR-30b-3p, miR-541, miR-1285, miR-143-5p, miR-223-3p, miR-432

miR-22-5p, miR-147-5p, miR-877-3p, miR-6128, novel\_60, miR-3059-5p, miR-3956-3p, miR-7144-5p, miR-1248, novel\_94, miR-582-5p, miR-1306, miR-378b, miR-23b, miR-2387, miR-203-3p, miR-223-5p, miR-582-5p, miR-3965, miR-541-5p, novel\_68, miR-20a-3p, miR-543-5p, miR-181c-3p, miR-1306-5p, miR-210-5p, miR-2424, miR-2432, miR-654-3p, miR-23a-3p, let-7f-2-3p, let-7f-2-3p, miR-33a-5p, miR-26a-2-3p, miR-1193, miR-149-5p, miR-23b-3p, miR-7859, miR-1298-3p, miR-3431, miR-23c, miR-3600, miR-7641, miR-548e-3p

miR-30a-3p, miR-3074-2-3p, miR-1260b, miR-1260a, miR-30a-3p, miR-1260b, miR-142-3p, miR-16-1-3p, miR-487b-5p, miR-410-3p, miR-16-1-3p

miR-1343-3p, miR-2300a-5p, miR-340-3p, miR-31-5p, miR-3431, miR-432-5p, miR-194-3p, miR-484, miR-432, miR-30b-3p, miR-3071-5p, miR-7857, miR-1260b, miR-30b-3p, miR-2284aa, miR-2330-5p, miR-146a, miR-2285v, miR-1185-5p, miR-124-5p, miR-146b, miR-139-5p, miR-3120-3p, miR-320b, miR-323a-5p, miR-203-3p, miR-2387, miR-18a-3p, miR-19a-3p, novel\_94, miR-146b-5p, novel\_120, miR-6527, miR-877-3p, miR-2284w, miR-2440, miR-502-5p, miR-382-5p, miR-4726-5p, miR-147-5p, miR-18a-3p, miR-2285ad, miR-6516-5p, miR-505-5p, miR-2284z, miR-5703, miR-2904, miR-19b-3p, miR-378d, miR-125b-2-3p, miR-2432, miR-146a-5p, miR-376c-5p, miR-376b-5p, miR-210-5p, novel\_17, miR-1260a, novel\_127, miR-2484, miR-548o-3p, miR-139-5p, miR-323-5p, miR-6516, miR-582-5p, miR-877-5p, miR-133b-3p, miR-1827, miR-582-5p, miR-671-5p, miR-7144-5p, miR-539-5p, miR-665-5p, miR-133a-3p, miR-193a-5p, miR-6128, novel\_44, miR-1260b, miR-5100, miR-409-3p, miR-664a, miR-208b-5p, miR-31-3p

HECTD3 ENSOARGO(HECT dom.3p

REL ENSOARGO(v-rel av 3p

FAM45A ENSOARGO(family w 3p

KIAA0141 ENSOARGO(KIAA0141 5p

miR-303-5p, miR-310-5p, novel\_118, miR-118-5p, miR-3431, novel\_23, miR-450c-3p, miR-22-3p, miR-7b-5p, miR-432, miR-27b-3p, miR-2284x, miR-4508, miR-497-5p, miR-3432b, miR-381-5p, miR-16b, miR-628-5p, miR-6240, miR-432-3p, miR-2285r, miR-432-3p, miR-2411-3p, novel\_51, miR-3141, miR-2285v, miR-146a, miR-7-5p, miR-378a-5p, miR-483-3p, miR-3074-5p, novel\_68, miR-320c, novel\_69, miR-216a-3p, miR-3065-5p, miR-150-5p, miR-3141, miR-148a-3p, miR-2319a, miR-146b-5p, miR-199b-5p, miR-2284o, miR-28c, novel\_79, miR-6517, miR-2285ad, miR-450a-1-3p, miR-322-5p, miR-9-5p, miR-330-5p, miR-2427, miR-885-3p, miR-2284f, miR-3064-5p, miR-3956-5p, miR-450c-5p, miR-2285b, miR-2284y, miR-200a, miR-148b-5p, miR-152-3p, novel\_96, miR-200a-3p, miR-125a, miR-3956, miR-542-5p, miR-2355-5p, miR-331-5p, miR-345-5p, miR-2474, miR-16-5p, miR-2284v, novel\_42, miR-1260b, miR-6740-5p, miR-125b-5p, miR-2284k, miR-2433, miR-331-5p, miR-330-3p, miR-1343-3p, miR-2459, miR-148b-5p, miR-1298-3p, miR-539-5p, miR-501-3p, miR-2284b, miR-127-3p, miR-16b, miR-199a-3p, miR-214-3p, miR-381-5p, miR-103a-2-5p, miR-146b, miR-199b-5p, miR-491-5p, miR-1185-5p, miR-2284g, miR-500-3p, miR-25, miR-378j, miR-335-3p, miR-136-5p, miR-96-5p, let-7i-3p, miR-9-5p, miR-2284j, miR-423-5p, miR-615, miR-101-3p, miR-3968, miR-499a-5p, miR-217-5p, miR-2366, miR-148a-5p, miR-2284u, miR-664-5p, miR-33b-3p, miR-184-3p, miR-503-5p, miR-486-3p, miR-377-5p, miR-92a-1-5p, miR-345-3p, miR-500a-5p, miR-324-3p, miR-2484, miR-202-5p, miR-296-3p, miR-30c-1-3p, miR-2331-3p, miR-15b-5p, miR-216b-5p, miR-500a-3p, miR-129b-3p, miR-450a-1-3p, miR-885-3p, miR-625-5p, miR-345-5p, miR-339b, miR-665-5p, miR-214, miR-3074-5p, miR-433-5p, miR-3184-5p, miR-122-5p, miR-3604, miR-665, miR-130b-5p, miR-500, miR-377-5p, miR-26b-3p, miR-503-5p, miR-185-

METAP1D ENSOARGO(methiony

miR-216b-3p, miR-306b-3p, miR-30c-1-3p, miR-221-5p, miR-32-5p, miR-504-5p, miR-545-3p, novel\_32, miR-27a-5p, miR-21a-3p, miR-2285c, miR-625-5p, miR-1827, novel\_99, miR-339b, miR-214, miR-6134, miR-338-3p, miR-6525, miR-219b-3p, miR-2285j, miR-130b-5p, miR-669a-3p, miR-664a, miR-212-5p, miR-505-3p, miR-106a, miR-532-3p, miR-1247-5p, miR-200b, miR-1197-5p, miR-217-5p, miR-191, miR-2366, miR-2300b-3p, miR-664-5p, miR-361-5p, miR-34a-5p, miR-33b-3p, miR-20a, miR-183-5p, miR-486-3p, miR-2432, miR-216a-5p, miR-345-3p, miR-125b, miR-92a-1-5p, novel\_17, miR-2285p, miR-34b-5p, miR-221-5p, miR-30b-3p, miR-1277-5p, miR-106a, miR-466i-5p, miR-760-3p, miR-541-5p, miR-7689-3p, miR-211-5p, miR-454-5p, miR-361-3p, miR-140-5p, miR-199b-5p, miR-3963, miR-668-5p, miR-504, miR-1296-5p, novel\_60, miR-3059-5p, miR-363-3p, miR-3956-3p, miR-8095, miR-219a-2-3p, miR-361-3p, miR-877-3p, miR-371a-5p, miR-301a-5p, miR-4726-5p, novel\_78, miR-2300a-5p, novel\_4, miR-330-3p, miR-216a-3p, miR-9788-3p, miR-2285e, miR-30b-3p, miR-6529a, miR-484, miR-143-5p, miR-301b-5p, miR-1298-5p, miR-1839-5p, miR-676-3p, miR-106a-5p, miR-8485, miR-2310, miR-30c-1-3p, miR-106b-5p, miR-1306-5p, miR-199b-5p, miR-214-3p, miR-491-5p, miR-487b-5p, miR-2355-5p, miR-125a, miR-199a-5p, miR-34c-5p, miR-25-3p, miR-93-5p, miR-200a-5p, miR-17-5p, miR-424-3p, miR-23a-5p, miR-7144-5p, miR-1248, miR-1814c, miR-6128, miR-1306-5p, miR-145-3p, miR-93, miR-1197-3p, miR-1260b, miR-125b-5p, miR-34c-3p, miR-2433, miR-2332, miR-191-5p, miR-486b-3p, miR-204-5p, novel\_79, miR-429-3p, miR-582-3p, miR-483-3p, miR-1343-5p, miR-345-3p, miR-200b-3p, miR-128-3p, miR-411-3p, miR-181a-2-3p, novel\_39, miR-3065-3p, miR-199a-5p, miR-490-3p, miR-92b-3p, miR-30c-2-3p, miR-217, miR-339a, miR-1260a, miR-664-3p, miR-219-3p, miR-200c, novel\_96, miR-92a-3p, miR-150a-2-3p, miR-486b-3p, miR-345-3p, miR-2411-3p, miR-2428, miR-486-3p, novel\_39, miR-432-3p, miR-432-3p, miR-101c, miR-219a-1-3p, miR-30b-3p, miR-5703, miR-30b-3p, miR-3154, miR-2366, miR-345-3p, miR-9788-3p

|        |                   |                                                                                                                                                                                                                                                                                                                                                                                                                                                                                                                                                                                                                    |
|--------|-------------------|--------------------------------------------------------------------------------------------------------------------------------------------------------------------------------------------------------------------------------------------------------------------------------------------------------------------------------------------------------------------------------------------------------------------------------------------------------------------------------------------------------------------------------------------------------------------------------------------------------------------|
|        |                   | novel_121, miR-129-1-3p, miR-545-5p, miR-2284z, miR-200b, miR-212-5p, miR-429-3p, miR-105-2, miR-200b-3p, let-7d, miR-300, miR-142-3p, miR-19b-3p, miR-218-2-3p, miR-1961, let-7g, miR-29b-1-5p, miR-29b-2-5p, miR-369-3p, miR-195a-3p, miR-200a-3p, let-7k, let-7f-5p, miR-200c-3p, miR-98-5p, let-7c-5p, miR-324-3p, miR-200c, miR-2285p, miR-2285af, let-7i-5p, miR-301a-3p, miR-374c-3p, miR-141-3p, miR-370-3p, miR-186-5p, novel_99, miR-671-5p, miR-7144-5p, miR-3154, miR-362-5p, miR-655, miR-381-3p, let-7b-5p, miR-500b-5p, miR-425-5p, miR-129-2-3p, miR-145a-3p, let-7b, miR-454-                     |
| TES    | ENSOARGO(testin L | 3p, novel_74, miR-29b-2-5p, miR-655-3p, miR-324-3p, let-7f, miR-34c-3p, miR-1185-3p, miR-500-5p, let-7g-5p, miR-153, miR-26b-3p, miR-130a-3p, miR-199b-3p, miR-105-1, miR-7862, miR-2284x, miR-1839-5p, miR-2284aa, miR-2426, novel_23, miR-1843b-5p, miR-101b-3p, let-7a-5p, miR-103a-2-5p, let-7e, miR-153-3p, miR-130b-3p, miR-105-5p, miR-29b-1-5p, miR-1185-2-3p, miR-203-3p, let-7d-5p, miR-3596, novel_68, let-7e-5p, miR-19a-3p, miR-129b-5p, miR-381-3p, miR-154a, miR-301b-3p, novel_111, miR-371b-3p, miR-362-5p, miR-147-5p, miR-199c, miR-2284q, miR-22-5p, let-7i, miR-107-5p, miR-371a-5p, miR-1973 |
|        |                   | miR-2285u, miR-182-5p, miR-669, miR-23b, miR-2285ab, miR-2285c, miR-543-3p, miR-1814c, miR-6395, miR-96-5p, miR-2312, miR-1271, miR-2285f, miR-190b-5p, miR-181d-5p, miR-541-3p, novel_27, miR-181c-5p, miR-2285n, miR-4324, miR-190a-5p, miR-3600, miR-2285e, miR-328-3p, miR-23b-3p, miR-432-5p, miR-2285g, miR-23c, miR-1271-5p, miR-432, miR-181a-5p, miR-541, miR-23a-3p, miR-382-3p, miR-8485, miR-143-3p, miR-2310, miR-2285r, miR-29b-1-5p, miR-190a, miR-29b-1-5p, miR-216a-5p, miR-182-5p, miR-2285af, miR-125a-3p, novel_17, miR-181b-5p                                                                |
| ADCK3  | ENSOARGO(aarF dom |                                                                                                                                                                                                                                                                                                                                                                                                                                                                                                                                                                                                                    |
| HIVEP2 | ENSOARGO(human im | novel_1, miR-3184-3p                                                                                                                                                                                                                                                                                                                                                                                                                                                                                                                                                                                               |

miR-2284z, miR-505-5p, miR-582-3p, miR-29d-3p, miR-1290, miR-2285b, miR-181b-5p, miR-664-3p, miR-219-3p, miR-324-5p, miR-3965, miR-3959-5p, miR-2285aa, miR-125a, miR-215-5p, miR-20b-5p, miR-345-5p, miR-93-5p, miR-17-5p, miR-320a, miR-93, miR-144-5p, miR-31-3p, miR-138-5p, miR-331-3p, miR-125b-5p, miR-551b-3p, miR-34c-3p, miR-2433, miR-29b-3p, miR-20b, miR-432-5p, miR-134-3p, miR-185-5p, miR-665, miR-133b-5p, miR-744-5p, miR-27b-3p, miR-29b, miR-138, miR-21-5p, miR-219a-1-3p, novel\_23, miR-432, miR-708-3p, miR-296-3p, miR-345-5p, miR-2285r, miR-628-5p, miR-130b-5p, miR-493-5p, miR-125a-5p, miR-17-5p, miR-106a-5p, miR-296-3p, miR-377-3p, miR-320c, miR-29a-3p, miR-9851-3p, miR-2319a, miR-1291, miR-3970, miR-21c, miR-378b, miR-371b-3p, miR-24-3p, miR-3957-3p, miR-29c-3p, miR-2285x, miR-342-3p, miR-128-1-5p, miR-29a, miR-3613, miR-20a-5p, miR-106a, miR-361-5p, miR-493-3p, miR-4429, miR-1197-5p, miR-5703, miR-188-3p, novel\_133, miR-2300b-3p, miR-215-5p, miR-2424, miR-143-3p, miR-20a, miR-221-5p, miR-2484, miR-106a, miR-320d, miR-125b, miR-196a-3p, novel\_32, miR-377-3p, miR-192-5p, miR-216b-5p, miR-552-3p, miR-296-3p, miR-221-5p, miR-1895, let-7g-3p, miR-345-5p, miR-27b-5p, miR-129b-3p, miR-3613-5p, miR-3184-5p, miR-6134, miR-214, miR-665-5p, miR-4492, miR-130b-5p, miR-219b-3p, miR-132-5p, miR-320e, miR-665, miR-9788-3p, miR-1298-3p, miR-27a-3p, miR-2284aa, miR-1388-5p, miR-6529a, miR-301b-5p, miR-2330-5p, miR-106a-5p, miR-103a-2-5p, miR-214-3p, miR-106b-5p, miR-342, miR-320b, miR-144-5p, miR-27a-3p, miR-378g, miR-664b, miR-10b, miR-20a-3p, miR-493-5p, miR-361-3p, miR-423-5p, miR-219a-2-3p, miR-181d-5p, miR-3059-5p, miR-212-3p, miR-2284q, miR-107-5p, miR-301a-5p, miR-101-3p, miR-187-3p, miR-29a-5p, miR-216b-5p, miR-185-3p, miR-1343-5p, miR-324-3p, miR-6529b, miR-193b-5p, miR-378d, miR-1343-5p, miR-4492, miR-1-5p, miR-21a-3p, miR-23b, miR-29b-2-5p, miR-1a-2-5p, miR-1a-1-5p, miR-3120-3p, miR-29b-2-5p, miR-23a-3p, miR-499a-3p, miR-23b-3p, miR-1b-5p, miR-326, miR-142b, miR-107-5p, miR-1197-5p, miR-330-5p, miR-664a, miR-127-5p, miR-136-5p, miR-486b-3p, miR-485-5p, miR-103a-2-5p, miR-3059-5p, miR-326-3p, miR-486-3p

STAT3 ENSOARGO( signal t

TMEM150B ENSOARGO( transmem

ZNF616 ENSOARGO( zinc fin

AIG1 ENSOARGO( androgen

miR-1895, novel\_48, miR-21a-3p, miR-199a-5p, miR-204-3p, miR-6516, miR-139-5p, miR-221-5p, miR-5100, miR-1260b, miR-224-5p, novel\_42, miR-145a-3p, miR-105-2, miR-615-3p, miR-7859, miR-6516-5p, miR-2411-5p, miR-483-3p, miR-505-3p, miR-548e-3p, miR-221-5p, miR-2898, miR-324-3p, miR-376b-3p, miR-1260a, miR-2285af, miR-6119-5p, miR-2411, miR-2424, miR-199a-5p, miR-2285b, miR-376a-3p, miR-505-3p, miR-376b-3p, miR-129b-5p, miR-140-5p, miR-199b-5p, miR-376d, miR-2404, miR-374c-3p, miR-3082-5p, miR-2483-3p, miR-499b-5p, miR-139-5p, miR-20a-3p, miR-128-1-5p, novel\_1, miR-371a-5p, miR-33a-3p, miR-615, miR-199b-5p, miR-361-3p, miR-3957-3p, miR-2447, miR-2284x, miR-30b-3p, miR-1260b, miR-101a-5p, miR-197-3p, miR-30b-3p, miR-758-3p, miR-7b-5p, miR-376b-3p, miR-105-1, novel\_78, miR-199b-5p, miR-466f-3p, miR-483-3p, miR-105-5p, miR-7-5p, miR-224-5p, miR-5126, miR-4532, miR-758-3p, miR-668-3p, miR-33a-5p, novel\_79, miR-412, miR-6517, miR-450a-1-3p, miR-2284z, miR-134-5p, miR-129-1-3p, miR-486-5p, novel\_121, miR-9-5p, miR-322-5p, miR-2427, miR-330-5p, miR-3591-5p, miR-1290, miR-155-5p, miR-30c, miR-200a, miR-29a-5p, miR-192-3p, miR-30f, miR-205-5p, miR-219-3p, miR-664-3p, miR-8117, miR-200a-3p, miR-1a-2-5p, miR-2285aa, miR-3068-3p, miR-503-3p, miR-223-5p, miR-23b, miR-424-3p, miR-329a, miR-329b, miR-345-5p, miR-16-5p, miR-193a-5p, miR-494-5p, miR-134-5p, miR-339-5p, miR-103a-3p, miR-149-5p, novel\_116, miR-134-3p, miR-197-3p, miR-450c-3p, miR-22-3p, novel\_23, miR-19b-2-5p, miR-1843b-5p, miR-497-5p, miR-27b-3p, miR-16b, miR-16-1-3p, miR-493-5p, miR-432-3p, miR-365b-5p, miR-296-3p, miR-377-3p, miR-193a-3p, novel\_68, miR-144-3p, miR-193b-3p, miR-1a-1-5p, miR-374c-5p, miR-485-3p, miR-4324, miR-6123, miR-30d-3p, miR-7859, miR-23b-3p, miR-23c, miR-30c-5p, miR-16-1-3p, miR-493-3p, miR-142-3p, miR-369-3p, miR-345-3p, miR-122-3p, miR-30b, miR-216b-3p, miR-296-3p, miR-30c-1-3p, miR-15b-5p, miR-377-3p, miR-10a, miR-582-5p, miR-129b-3p, miR-30d-5p, miR-655, miR-433-3p, miR-487b-5p, miR-2285c, miR-450a-1-3p, miR-1827, miR-339b, miR-345-5p, miR-129-2-3p, miR-181c-5p, miR-6525, miR-30a-3p, miR-219b-3p, miR-3604, miR-665, miR-2285j, miR-30e-3p, miR-454-3p, miR-129-5p, miR-190a-5p, miR-4492, miR-130b-5p, miR-487b-5p, miR-145b, novel\_78, miR-548w, miR-1343-3p, miR-539-5p, miR-147a, miR-329-3p, miR-362-3p, miR-23a-3p, miR-101b-3p, miR-8485, miR-2310, miR-16b, miR-1185-5p, miR-130b-3p, miR-374b-5p, miR-203-3p, miR-378g, miR-3596, miR-2483-3p, miR-378j, miR-381-3p, miR-140-5p, miR-493-5p, miR-136-5p, miR-6527, miR-9-5p, miR-190b-5p, miR-361-3p, miR-222, miR-582-3p, miR-545-5p, miR-214-5p, miR-302a-5p, miR-6516-5p, miR-134, miR-496, miR-10a-5p, miR-411-3p, miR-30a-3p, miR-2065-3p, miR-30c-2-3p, miR-330a, miR-2285af, miR-2307-

SCAPER ENSOARGO(S-phase)

TMEM165 ENSOARGO(transmem)

miR-450b-3p, miR-9851-3p, miR-639b, miR-2387, miR-148a-3p, miR-3065-5p, miR-3591-3p, miR-320c, miR-3120-3p, miR-206, miR-656-5p, miR-502-5p, miR-4324, miR-2428, miR-495-3p, miR-2285x, miR-2284x, miR-450c-3p, novel\_23, miR-3071-5p, miR-31-5p, miR-665, miR-124-5p, miR-125a-5p, miR-296-3p, miR-2411-3p, miR-432-3p, miR-432-3p, miR-2284l, miR-296-3p, miR-345-5p, miR-363-5p, miR-345-5p, miR-671-5p, miR-301, miR-3154, miR-320a, miR-300-3p, miR-376c-3p, miR-2284n, miR-125a, miR-486b-3p, miR-134-5p, miR-2284k, miR-125b-5p, miR-100-3p, miR-3969, miR-323-3p, miR-1306-5p, miR-2284v, miR-6128, miR-103b, miR-345-3p, miR-134, miR-9-5p, miR-302a-5p, miR-2411-5p, miR-134-5p, miR-450a-1-3p, miR-429-3p, miR-2898, miR-152-3p, miR-30c-2-3p, miR-2285b, miR-192-3p, miR-1, miR-504, miR-9-3p, miR-361-3p, miR-140-5p, miR-2483-3p, miR-4443, miR-499b-5p, miR-7977, miR-4726-5p, miR-101-3p, miR-361-3p, miR-9-3p, miR-423-5p, miR-2447, novel\_60, miR-3956-3p, miR-212-3p, miR-9-5p, miR-2284j, miR-1388-5p, miR-450b-5p, miR-6529a, miR-484, miR-1a-3p, miR-147a, miR-539-5p, miR-9788-3p, miR-455-3p, miR-2459, novel\_4, miR-548w, miR-1185-5p, miR-487b-5p, miR-214-3p, miR-199a-3p, miR-320b, miR-29b-1-5p, miR-30c-1-3p, miR-3187-3p, miR-124a, miR-1388-3p, miR-2330-5p, miR-345-5p, miR-625-5p, miR-186-5p, miR-1827, let-7f-1-3p, miR-376e-3p, novel\_25, miR-204-3p, miR-504-5p, miR-221-5p, miR-30c-1-3p, miR-21-3p, let-7b-3p, miR-3604, miR-320e, miR-206-3p, miR-98-3p, miR-3184-5p, miR-539-5p, miR-214, miR-4429, miR-133a-3p, miR-378d, let-7a-3p, miR-124-3p, miR-98-3p, miR-5703, miR-148b-3p, miR-340-5p, miR-2284h-5p, miR-199a-3p, miR-532-3p, miR-328-3p, miR-212-5p, miR-2284m, miR-320d, miR-221-5p, miR-324-3p, miR-125b, miR-345-3p, miR-376a-5p, miR-664b-3p, miR-29b-1-5p, miR-376c-3p, miR-125b-2-3p, miR-2411, miR-486-3p, miR-2285w



novel\_94, miR-361-3p, miR-129b-5p, miR-378e, miR-7857-3p, miR-27a-3p, miR-3064-5p, miR-7977, miR-450a-5p, miR-2285n, miR-769-5p, miR-154a, miR-212-3p, miR-452-5p, miR-219a-5p, miR-450b-5p, miR-378c, miR-3120-5p, miR-296-5p, miR-378b, miR-30b-3p, miR-221-3p, novel\_4, miR-409b, miR-151a-3p, miR-27a-3p, miR-3085-3p, miR-1306-5p, miR-5126, miR-326, miR-320b, miR-193a, miR-494-3p, miR-106a-5p, miR-154b-3p, novel\_99, miR-582-5p, miR-21a-3p, miR-193b-3p, miR-6130, miR-139-5p, miR-132-5p, miR-378a-3p, miR-182-5p, miR-664a, miR-208b-5p, miR-338-5p, miR-320e, miR-29b-2-5p, miR-19b-1-5p, miR-4510, miR-145a-3p, miR-378c, miR-3074-2-3p, miR-4429, miR-1197-5p, miR-140-3p, miR-487a-3p, miR-616-3p, miR-485-3p, miR-3600, miR-466i-5p, miR-106a, miR-320d, miR-21-3p, miR-196a-3p, miR-125b, miR-185-3p, miR-20a, miR-9851-3p, miR-2387, miR-29a-3p, miR-670-3p, miR-2404, miR-378b, miR-320b, miR-147-5p, miR-6402, miR-20a-5p, miR-24-3p, miR-323c, miR-2428, miR-326-3p, miR-29b, miR-138, miR-30b-3p, miR-1285, miR-873a-5p, miR-653, miR-503-5p, miR-20b, miR-187-3p, miR-2285l, miR-1343-5p, miR-125a-5p, miR-224-5p, miR-503-5p, miR-17-5p, miR-106a-5p, miR-190a, miR-345-5p, miR-539-3p, miR-130b-5p, miR-10a-3p, miR-485-5p, miR-671-5p, miR-7144-5p, miR-488-3p, miR-17-5p, miR-320a, miR-769, miR-3965, miR-154b-5p, miR-487a-3p, miR-141-3p, miR-615-5p, miR-598-3p, miR-370-3p, miR-138-5p, miR-486b-3p, miR-2332, miR-135a-1-3p, miR-29b-3p, miR-410-5p, miR-144, miR-331-3p, miR-93, miR-323-3p, miR-378c, miR-365a-5p, miR-128-3p, miR-345-3p, miR-29d-3p, miR-378h, miR-196a-2-3p, miR-200c-3p, miR-450a-2-3p, miR-543-5p, miR-200c, miR-28b, miR-1271-3p, miR-4286, miR-181a-2-3p, miR-29b-2-5p, miR-544-5p, miR-335-3p, miR-493-5p, miR-221, miR-378g, miR-203-3p, miR-139-5p, miR-2285u, miR-154-3p, miR-3964, miR-218-5p, novel\_89, miR-361-3p, miR-877-3p, miR-885-5p, miR-190b, miR-301a-3p, miR-323-5p, miR-199a-5p, miR-2331-3p, miR-296-3p, miR-1248, miR-1827, miR-21a-3p, miR-323-3p, miR-145a-3p, miR-3074-2-3p, novel\_74, miR-17-3p, miR-454-3p, miR-130b-5p, miR-2285j, miR-135a-5p, miR-7859, miR-199a-3p, miR-2284z, miR-548e-3p, miR-7641, miR-3600, miR-582-3p, miR-16-1-3p, miR-148a-5p, miR-378d, miR-2284u, miR-2300b-3p, miR-376a-5p, miR-1343-5p, miR-23b-5p, miR-2284y, miR-199a-5p, miR-146a-5p, miR-29a-5p, miR-143-3p, miR-2284a, miR-490-3p, miR-503-5p, miR-2284f, miR-202-5p, miR-17-3p, miR-30b-3p, miR-1277-5p, miR-543-5p, miR-2285af, miR-664-3p, miR-92a-1-5p, miR-323a-5p, miR-2404, miR-25, miR-2483-3p, miR-489, miR-652-3p, miR-6535, miR-2284g, miR-664b, miR-541-5p, miR-3120-3p, miR-7-1-3p, miR-2284e, miR-7975, miR-146b-5p, miR-544-5p, miR-135b-5p, miR-199b-5p, miR-301b-3p, miR-199b-5p, novel\_60, miR-3059-5p, miR-3956-3p, miR-17-3p, miR-495-3p, miR-6119-3p, miR-199c, miR-218-5p, miR-6402, miR-2284o, miR-3535, miR-412-5p, miR-503-5p, miR-148b-5p, miR-9788-3p, miR-3955-5p, miR-548w, miR-199b-3p, novel\_78, miR-130a-3p, miR-145b, miR-16-1-3p, miR-26a-2-3p, miR-2284aa, miR-2889, miR-455-5p, miR-2284x, miR-4791, miR-143-5p, miR-145a-5p, miR-130b-5p, miR-382, miR-628-5p, miR-130b-3p, miR-1343-5p, miR-146b, miR-199b-5p, miR-199a-3p, miR-503-5p, novel\_115, miR-146a, miR-455-5p

miR-1291, miR-2319a, miR-6395, miR-361-3p, miR-2285ab, miR-409-5p, miR-148a-3p, miR-18a-3p, miR-3065-5p, miR-378g, miR-146b-3p, miR-34b, novel\_69, miR-29a-3p, miR-2319b, miR-4726-5p, miR-29a, miR-502b, novel\_82, miR-2285n, miR-615, miR-28c, miR-576-3p, miR-34c, miR-107-5p, miR-361-3p, miR-877-3p, miR-449a, miR-2284w, miR-3059-5p, miR-2447, miR-2285f, miR-6527, miR-452-5p, miR-29c-3p, miR-29b, miR-4508, miR-7862, miR-432, miR-143-5p, miR-2285g, miR-432-5p, miR-134-3p, miR-503-5p, miR-2285e, novel\_4, miR-222-5p, miR-2285l, miR-487b-5p, miR-125a-5p, miR-214-3p, miR-103a-2-5p, miR-503-5p, miR-29b-1-5p, miR-505, miR-2957, novel\_51, miR-136-3p, miR-2285r, miR-432-3p, miR-432-3p, miR-124a, miR-2330-5p, miR-2312, miR-876-3p, miR-625-5p, miR-2285c, miR-3154, miR-34c-5p, novel\_32, miR-204-3p, miR-324-5p, miR-140-5p, miR-2331-3p, miR-221-5p, miR-874-3p, miR-99a-3p, miR-370-3p, miR-2355-5p, miR-125a, miR-1271, miR-874-5p, miR-208b-5p, miR-29b-3p, miR-99b-3p, miR-331-3p, miR-125b-5p, miR-665, miR-6525, miR-338-3p, miR-3074-2-3p, miR-214, miR-33b-3p, miR-664-5p, miR-34a-5p, miR-615-3p, miR-3578, miR-2300b-3p, miR-29d-3p, miR-124-3p, miR-1193, miR-95-3p, miR-148b-3p, miR-1247-5p, novel\_83, miR-545-5p, miR-328-3p, miR-18a-3p, miR-99a-3p, miR-760-3p, miR-221-5p, miR-34b-5p, miR-21-3p, novel\_127, miR-152-3p, miR-205-5p, miR-324-3p, miR-125b, miR-185-3p, miR-28b, miR-29b-1-5p, miR-490-3p, miR-503-5p, miR-105-3p, miR-5100, miR-4286

miR-15a, miR-16a, miR-128-1-5p, miR-342-3p, novel\_120, miR-135a-2-3p, miR-3957-3p, miR-17-3p, miR-24-3p, miR-1307-3p, miR-18b, miR-18a-3p, miR-378b, miR-1291, miR-2285k, miR-19a-3p, miR-107, miR-195a-5p, miR-379-5p, miR-10a-5p, miR-455-5p, miR-452-5p, miR-1343-5p, miR-363-5p, miR-374b-3p, miR-3071-5p, miR-30b-3p, miR-455-5p, miR-2889, miR-187-3p, miR-103, miR-544b, miR-486b-3p, miR-28-5p, miR-103b, miR-133a-3p, miR-378c, miR-365a-5p, miR-488-3p, miR-503-3p, miR-3154, miR-18a, miR-7144-5p, miR-485-5p, miR-615-5p, miR-374c-3p, miR-199a-5p, miR-339a, miR-2898, miR-450a-2-3p, miR-17-3p, miR-107, miR-543-5p, miR-30a-3p, miR-28b, miR-199a-5p, miR-345-3p, miR-582-3p, miR-10a-5p, miR-378h, miR-2285n, miR-335, miR-2284q, miR-3059-5p, miR-541-3p, miR-361-3p, miR-199b-5p, miR-3064-5p, miR-10b, miR-499b-5p, miR-7977, miR-378e, miR-3082-5p, miR-27a-3p, miR-342, novel\_103, miR-5126, novel\_124, miR-3085-3p, miR-25-5p, miR-2330-5p, miR-424-5p, miR-33a-5p, miR-3187-3p, miR-193a, miR-4532, miR-378b, miR-484, miR-10b, miR-143-5p, miR-30b-3p, miR-378c, miR-2426, miR-544a, novel\_4, miR-2300a-5p, miR-27a-3p, miR-320e, miR-17-3p, miR-708-5p, miR-424-5p, miR-539-5p, miR-378c, miR-145a-3p, miR-4510, miR-3074-2-3p, miR-10b-5p, miR-6134, miR-338-3p, miR-133b-3p, miR-18a-5p, miR-378a-3p, miR-21-3p, miR-182-5p, miR-544-3p, miR-6130, miR-193b-3p, miR-22-3p, novel\_32, miR-196a-3p, miR-185-3p, miR-466i-5p, miR-760-3p, miR-30b-3p, miR-2904, miR-188-3p, miR-140-3p, miR-5703, miR-19b-3p, miR-378d, miR-3960, miR-3600, miR-1b-3p, miR-15a-5p, miR-532-3p, miR-28c, miR-625-3p, miR-6123, miR-335-5p, miR-193b-3p, miR-199b-5p, miR-2285m, miR-3970, miR-150-5p, miR-3591-3p, miR-378f, miR-3074-5p, miR-3120-3p, novel\_69, miR-374c-3p, miR-669, miR-7-5p, miR-582, miR-365b-5p, miR-2411-3p, novel\_51, miR-378a-5p, miR-196b-5p, miR-378g, miR-134-3p, miR-664a, miR-486-3p, miR-486b-3p, miR-1343-3p

NAA10 ENSOARGO(N(alpha)

RABL6 ENSOARGO(RAB, mem

ARHGAP22 ENSOARGO(Rho GTPa

CNOT1 ENSOARGO(CCR4-NOT

novel\_68, miR-3064-5p, miR-7689-3p, miR-10a-5p, miR-378g, miR-6535, miR-136-5p, miR-9851-3p, novel\_94, miR-541-3p, miR-2428, novel\_82, miR-142b, miR-576-3p, miR-2440, miR-1973, miR-2285t, miR-1343-3p, miR-26b-3p, miR-185-5p, miR-134-3p, miR-149-5p, miR-2284r, miR-541, miR-10b, miR-30b-3p, miR-30b-3p, miR-1260b, miR-455-5p, miR-3187-3p, miR-345-5p, miR-2285v, miR-455-5p, miR-3085-3p, miR-1343-5p, miR-214-3p, miR-574-5p, miR-2331-3p, miR-370-3p, miR-141-3p, miR-10a, miR-345-5p, miR-345-5p, miR-485-5p, miR-214, miR-10b-5p, miR-1260b, miR-6134, miR-5100, miR-324-3p, miR-664a, novel\_83, miR-214-5p, novel\_133, miR-1343-5p, miR-2904, miR-493-3p, miR-133a-3p, miR-10a-5p, miR-3064-5p, miR-181a-2-3p, miR-1271-3p, miR-1260a, miR-210-5p, novel\_17, miR-324-3p, miR-2898, miR-760-3p, miR-21-3p, miR-200a-3p

miR-376e-3p, miR-194-3p, miR-216a-3p, miR-486-3p, miR-376c-3p, miR-488-3p, miR-576-3p, miR-486b-3p

miR-3068-3p, miR-2355-5p, miR-544-3p, miR-6516, miR-377-3p, miR-204-3p, miR-2285c, miR-301, miR-129b-3p, miR-362-5p, miR-2312, miR-345-5p, miR-345-5p, miR-3074-1-3p, miR-671-5p, miR-129-2-3p, miR-103b, miR-500b-5p, miR-1260b, miR-338-3p, miR-410-5p, miR-34c-3p, miR-29b-2-5p, novel\_74, miR-410-3p, miR-299a-3p, miR-429-3p, miR-3600, miR-412, miR-212-5p, miR-6516-5p, miR-148b-3p, miR-200b, miR-532-3p, miR-129-1-3p, novel\_133, miR-1290, miR-217-5p, miR-188-3p, miR-200b-3p, miR-29b-2-5p, miR-181a-2-3p, miR-450b-5p, miR-148b-5p, miR-130a-5p, miR-2285af, miR-1260a, miR-200c, miR-542-5p, miR-125a-3p, miR-500a-5p, miR-217, miR-200c-3p, miR-152-3p, miR-299-3p, miR-21-3p, miR-20a-3p, miR-2319b, miR-2285u, miR-7977, miR-299b-3p, miR-27a-3p, miR-1185-2-3p, miR-361-3p, miR-2285ab, miR-148a-3p, miR-2447, miR-3059-5p, miR-2285f, miR-542-5p, miR-877-3p, miR-362-5p, miR-218-5p, miR-2285n, miR-382-5p, miR-499a-5p, miR-656-5p, miR-147-5p, miR-31-5p, miR-145b, miR-27a-3p, miR-2285g, miR-3431, miR-500-5p, miR-544b, miR-2285e, miR-484, miR-197-3p, miR-412-3p, miR-145a-5p, miR-1260b, miR-544a, miR-27b-3p, miR-33a-5p, let-7f-2-3p, let-7f-2-3p, miR-2285r, miR-4532, miR-345-5p, miR-377-3p, miR-2331-5p, miR-3955-3p, miR-542-5p, miR-218-2-3p, miR-29d-3p, miR-b01-3p, let-7d, miR-128-3p, miR-2411-5p, miR-214-5p, miR-376b-3p, miR-2285af, miR-339a, let-7c-5p, miR-2898, miR-450a-2-3p, miR-191-3p, miR-107, miR-543-5p, miR-30a-3p, miR-2385-3p, miR-28b, miR-2284a, miR-1271-3p, miR-10b-3p, miR-3074-1-3p, miR-485-5p, miR-370-3p, miR-215-5p, miR-34c-5p, miR-374c-3p, miR-29b-3p, miR-370-5p, miR-99b-3p, miR-331-3p, miR-3969, miR-204-5p, miR-486b-3p, miR-3607-3p, miR-873a-5p, miR-1285, miR-3071-5p, miR-145a-5p, miR-380-3p, miR-29b, miR-2889, miR-133b-5p, miR-432-5p, let-7g-5p, miR-6238, miR-103, miR-2355-3p, miR-544b, miR-1343-5p, miR-376b-3p, miR-18a-3p, miR-19a-3p, miR-107, miR-6516-3p, miR-655-5p, miR-29a-3p, miR-34b, miR-34c, let-7i, miR-656-5p, miR-203b-5p, novel\_101, miR-1193, miR-211, miR-3959-3p, novel\_27, miR-449a, miR-326-3p, novel\_133, miR-215-5p, miR-1197-5p, miR-1193, miR-19b-3p, miR-3600, miR-671-3p, miR-760-3p, miR-30b-3p, miR-34b-5p, miR-130a-5p, miR-2411, let-7g-3p, miR-545-3p, miR-370-5p, miR-182-5p, miR-544-3p, miR-192-5p, miR-193b-3p, miR-6130, miR-204-3p, miR-22-3p, miR-19b-1-5p, miR-450b-3p, miR-145a-3p, miR-4510, miR-425-5p, let-7b-5p, miR-338-3p, miR-544a, miR-5010-3p, miR-27a-3p, miR-9788-3p, miR-216a-3p, novel\_115, miR-326, miR-3955-3p, let-7e, let-7a-5p, miR-382-3p, miR-652-5p, miR-361-3p, miR-877-3p, miR-452-3p, miR-20a-3p, miR-541-5p, miR-489, let-7d-5p, miR-27a-3p, miR-376d, miR-4726-5p, miR-335, novel\_60, miR-3059-5p, miR-1296-5p, miR-452-5p, miR-502-3p, miR-154a, miR-1343-5p, miR-330-5p, miR-23b-5p, miR-6517, novel\_79, miR-431, miR-9-5p, miR-450a-1-3p, miR-129-1-3p, miR-486-5p, let-7f-5p, novel\_127, novel\_96, miR-148b-5p, miR-450b-5p, let-7g, miR-2284y, miR-200a, miR-2285b, miR-329b, miR-874-3p, miR-99a-3p, miR-1271, miR-6740-5p, novel\_42, miR-19b-2-5p, miR-708-3p, miR-432, miR-542-3p, miR-1843b-5p, miR-450c-3p, miR-92-

FUCA2 ENSOARGO(fucosida

PCDH12 ENSOARGO(protocolad

miR-6123, miR-128-1-5p, miR-34c, miR-16a, miR-42b-5p, novel\_87, miR-382-5p, miR-502-5p, miR-15a, miR-4324, miR-6529b, miR-449a, miR-199b-5p, miR-211, miR-17-3p, miR-342-3p, miR-9851-3p, miR-195a-5p, miR-1291, miR-450b-3p, miR-3141, miR-2387, miR-6535, miR-34b, novel\_69, miR-670-3p, miR-329-5p, miR-2285l, miR-3141, miR-330-3p, novel\_51, miR-224-5p, miR-503-5p, miR-377-3p, miR-654-3p, miR-382, miR-6240, miR-497-5p, miR-26a-2-3p, miR-27b-3p, miR-30b-3p, miR-16b, miR-1260b, miR-16-1-3p, miR-381-5p, miR-450c-3p, novel\_23, miR-432, miR-1843b-5p, miR-2113, novel\_116, miR-2355-3p, miR-432-5p, miR-2285g, miR-412-5p, miR-134-3p, miR-503-5p, miR-185-5p, miR-339-5p, miR-377-5p, miR-187-3p, miR-204-5p, miR-486b-3p, miR-28-5p, miR-331-3p, miR-409-3p, miR-2433, miR-500b-5p, miR-1260b, miR-16-5p, miR-193a-5p, novel\_42, miR-23a-5p, miR-485-5p, miR-1814c, miR-1248, novel\_91, miR-329a, miR-329b, miR-200a-5p, miR-362-5p, miR-3154, miR-488-3p, miR-381-3p, miR-503-3p, miR-199a-5p, miR-324-5p, miR-154b-5p, miR-3957, miR-34c-5p, miR-370-3p, miR-1271, miR-3957-5p, miR-17-3p, miR-2898, miR-30c-2-3p, miR-217, miR-339a, miR-1260a, miR-199a-5p, novel\_39, miR-29a-5p, miR-490-3p, miR-2478, miR-30a-3p, miR-4286, miR-885-3p, miR-300, miR-2427, miR-23b-5p, miR-615-3p, miR-545-5p, miR-450a-1-3p, novel\_121, miR-505-5p, miR-9-5p, miR-322-5p, miR-2411-5p, miR-6516-5p, miR-412, novel\_79, miR-2285ad, miR-6517, miR-4726-5p, miR-107-5p, miR-218-5p, novel\_82, miR-2440, miR-615, miR-423-5p, miR-362-5p, miR-9-5p, miR-2447, miR-335-3p, miR-544-5p, miR-877-3p, miR-136-5p, miR-668-5p, miR-378j, miR-361-3p, miR-199b-5p, miR-1185-2-3p, miR-27a-3p, miR-378g, miR-489, miR-211-5p, miR-452-3p, miR-2319b, miR-199b-5p, miR-103a-2-5p, miR-381-5p, novel\_124, miR-25-5p, miR-505, miR-362-3p, miR-16b, miR-342, miR-5126, novel\_103, miR-3187-3p, miR-193a, miR-

miR-378a-5p, miR-196b-5p, miR-377-3p, miR-146a, novel\_51, miR-3141, miR-365b-5p, miR-432-3p, miR-432-3p, miR-503-3p, let-7a-2-3p, miR-493-5p, let-7f-2-3p, let-7f-2-3p, miR-16b, miR-27b-3p, miR-497-5p, miR-2113, miR-22-3p, miR-134-3p, miR-194-3p, miR-411-5p, miR-103a-3p, miR-31-5p, miR-339-5p, miR-4324, miR-425-5p, miR-199b-5p, miR-146b-5p, miR-148a-3p, miR-3141, miR-3065-5p, miR-216a-3p, miR-3591-3p, miR-181b-3p, miR-677, miR-669, novel\_68, miR-3120-3p, miR-127-5p, miR-152-3p, novel\_127, miR-8117, miR-450c-5p, novel\_39, miR-3064-5p, miR-196a-5p, miR-330-5p, miR-23b-5p, miR-322-5p, miR-134-5p, miR-429-3p, miR-2285ad, novel\_79, miR-1224-5p, miR-134-5p, miR-125b-5p, miR-100-3p, miR-1197-3p, miR-1260b, novel\_42, miR-16-5p, miR-345-5p, miR-876-3p, miR-300-3p, miR-376c-3p, miR-874-3p, miR-1271, miR-125a, miR-2285aa, miR-2355-5p, miR-487b-5p, miR-130b-3p, miR-214-3p, miR-199b-5p, miR-146b, miR-16b, miR-29b-1-5p, miR-8485, miR-574-3p, miR-124a, miR-1388-3p, miR-21b, miR-301b-5p, miR-541, miR-2284r, miR-147a, miR-1185-3p, miR-2459, miR-455-3p, miR-548w, miR-1343-3p, miR-3968, miR-615, miR-218-5p, miR-301a-5p, novel\_111, miR-361-3p, miR-877-3p, miR-423-5p, miR-3956-3p, miR-136-5p, miR-504, miR-96-5p, miR-493-5p, miR-221, miR-3596, miR-378g, miR-4443, miR-1185-2-3p, miR-4792, miR-211-5p, miR-2285u, miR-2484, novel\_17, miR-210-5p, miR-324-3p, miR-181b-1-3p, miR-377-5p, miR-376c-3p, miR-376a-5p, miR-345-3p, miR-142-3p, miR-493-3p, miR-34a-5p, miR-133a-3p, miR-2366, miR-328-3p, miR-18a-3p, miR-212-5p, miR-487b-5p, novel\_74, miR-130b-5p, miR-874-5p, miR-4492, miR-454-3p, miR-2285j, miR-664a-5p, miR-665, miR-151-3p, miR-346, miR-6525, miR-3184-5p, miR-3184-3p, miR-214, miR-339b, miR-345-5p, miR-1827, miR-299, miR-376e-3p, miR-10a, miR-2284s, miR-377-3p, miR-15b-5p, miR-2321-3p, miR-504-5p, miR-30c-1-

MYH10 ENSOARGO(myosin,

miR-32-5p, miR-141-3p, miR-552-3p, miR-2355-5p, miR-370-3p, miR-25-3p, miR-3959-5p, miR-323-5p, miR-6130, miR-6516, miR-151b, miR-154b-5p, novel\_32, miR-381-3p, miR-411, miR-376c-5p, miR-1827, miR-671-5p, miR-543-3p, miR-885-3p, miR-1895, miR-376c-5p, miR-625-5p, miR-3184-3p, miR-3074-5p, miR-4510, miR-224-5p, miR-6134, miR-181c-5p, miR-365a-5p, miR-3184-5p, miR-2433, miR-2285j, miR-664a-5p, miR-3604, miR-331-3p, miR-6516-3p, miR-208b-5p, miR-487a-5p, miR-874-5p, miR-2285ad, miR-505-3p, miR-7641, miR-6516-5p, miR-151-5p, miR-2284h-5p, miR-671-3p, miR-2408, miR-330-5p, miR-1434-5p, miR-1343-5p, miR-124-3p, miR-300, miR-885-3p, miR-503-5p, miR-3064-5p, miR-142a-3p, miR-181b-1-3p, miR-92b-3p, novel\_39, miR-200a, miR-376c-5p, miR-210-5p, miR-374a-5p, miR-324-3p, miR-466i-5p, miR-181b-5p, miR-200a-3p, miR-543-5p, novel\_96, miR-92a-3p, miR-3074-5p, miR-3064-5p, miR-499b-5p, miR-541-5p, miR-323a-5p, miR-181b-3p, miR-27a-3p, miR-677, miR-6535, miR-376b-5p, miR-3970, miR-412-3p, miR-9-3p, miR-505-3p, miR-1983, miR-363-3p, miR-181d-5p, miR-2285x, miR-1285-5p, miR-326-3p, miR-423-5p, miR-9-3p, miR-2285y, miR-3958-3p, miR-92a-3p, miR-3964, miR-490-5p, miR-330-3p, miR-2300a-5p, miR-181b-2-3p, miR-27a-3p, miR-503-5p, miR-142-3p, miR-421, miR-143-5p, miR-181a-5p, miR-223-3p, miR-450b-5p, miR-27b-3p, miR-382-3p, miR-6240, miR-1388-3p, miR-124a, miR-376b, miR-326, novel\_115, miR-224-5p, miR-503-5p, miR-32, miR-330-3p, miR-365b-5p, miR-3085-3p, miR-491-5p, miR-1343-5p, miR-106b-3p

miR-33b, miR-2285t, miR-61b, miR-769-5p, miR-361-3p, miR-3059-5p, miR-190b-5p, miR-181d-5p, miR-668-5p, miR-504, miR-3963, miR-877-3p, miR-1983, miR-335-3p, miR-361-3p, miR-381-3p, miR-3596, miR-27a-3p, miR-203-3p, miR-4792, miR-139-5p, miR-2284g, miR-7977, miR-2285u, miR-7689-3p, miR-3955-3p, miR-214-3p, miR-381-5p, miR-326, miR-106b-5p, miR-29b-1-5p, miR-2957, miR-106a-5p, miR-1388-3p, miR-2284b, miR-23a-3p, miR-2426, miR-1388-5p, miR-3120-5p, miR-2284aa, miR-21b, miR-296-5p, miR-484, miR-412-3p, miR-147a, miR-2320-3p, miR-496-5p, miR-148b-5p, miR-9788-3p, miR-1343-3p, miR-2300a-5p, miR-27a-3p, miR-181b-2-3p, miR-5010-3p, miR-190a-5p, let-7b-3p, miR-2285j, miR-324-3p, miR-132-5p, miR-98-3p, miR-769-5p, miR-181c-5p, miR-3074-5p, miR-145a-3p, miR-425-5p, miR-214, miR-186-5p, miR-625-5p, let-7f-1-3p, miR-139-5p, miR-132-5p, miR-2284s, miR-151b, miR-877-3p, novel\_32, novel\_25, miR-504-5p, miR-2331-3p, novel\_107, miR-106a, novel\_17, miR-618, miR-125b, miR-2285i, miR-376a-5p, miR-29b-1-5p, miR-2432, miR-486-3p, miR-216c-5p, miR-2887, miR-20a, novel\_73, miR-33b-3p, let-7a-3p, miR-378d, miR-2284u, miR-148a-5p, miR-16-1-3p, miR-126-3p, miR-5703, miR-2904, miR-98-3p, miR-23c, miR-23b-3p, miR-328-3p, miR-151-5p, miR-106a, miR-3960, miR-212-5p, novel\_1, miR-6402, miR-20a-5p, miR-4324, miR-1307-5p, miR-371b-3p, miR-3959-3p, miR-323c, miR-24-3p, miR-326-3p, miR-335-5p, miR-412-3p, miR-2285k, miR-379-5p, miR-6395, miR-7975, miR-21c, miR-3065-5p, miR-374c-3p, novel\_69, miR-670-3p, miR-144-3p, miR-677, miR-3074-5p, novel\_68, miR-3120-3p, miR-483-3p, miR-466f-3p, miR-125a-5p, miR-7-5p, miR-17-5p, novel\_51, miR-106a-5p, miR-190a, miR-2285v, miR-432-3p, miR-2285r, miR-363-5p, miR-16-1-3p, miR-381-5p, miR-219a-1-3p, miR-138, miR-786g, miR-27b-3p, miR-181a-5p, miR-7b, miR-3154, miR-199b-5p, miR-1983, miR-412-3p, miR-141-3p, miR-216b-3p, miR-874-3p, miR-199a-5p, miR-29b-2-5p, miR-2284k, miR-130b-5p, miR-208b-5p, miR-6516-3p, miR-138-5p, miR-2284j, miR-3059-5p, miR-199b-5p, miR-2284w, miR-1260b, miR-323-3p, miR-188-3p, miR-125b-2-3p, miR-181a-5p, miR-542-3p, miR-1843b-5p, miR-2284x, miR-2284aa, miR-1260b, miR-138, miR-377-5p, novel\_78, novel\_116, miR-2284z, miR-147a, miR-210-3p, miR-2397-5p, novel\_17, miR-1260a, miR-543-5p, miR-200a-3p, miR-199b-5p, miR-466i-5p, miR-127-5p, miR-181b-5p, miR-2284m, miR-29b-2-5p, miR-5100, miR-130b-5p, miR-503-3p, miR-1271-3p, miR-199a-5p, miR-8485, miR-2432, miR-125b-2-3p, miR-377-5p, miR-365b-5p, miR-105-5p, miR-365a-5p, miR-345-5p, miR-105-2, miR-1291, miR-299a-5p, miR-345-5p, miR-345-5p, miR-542-5p, miR-548e-3p, miR-2300a-5p, miR-105-1, novel\_116, miR-214-5p, miR-24-2-5p

BTK ENSOARGO(Bruton a.5p, novel\_32, novel\_25, miR-504-5p, miR-2331-3p, novel\_107, miR-106a, novel\_17, miR-618, miR-125b, miR-2285i, miR-376a-5p, miR-29b-1-5p, miR-2432, miR-486-3p, miR-216c-5p, miR-2887, miR-20a, novel\_73, miR-33b-3p, let-7a-3p, miR-378d, miR-2284u, miR-148a-5p, miR-16-1-3p, miR-126-3p, miR-5703, miR-2904, miR-98-3p, miR-23c, miR-23b-3p, miR-328-3p, miR-151-5p, miR-106a, miR-3960, miR-212-5p, novel\_1, miR-6402, miR-20a-5p, miR-4324, miR-1307-5p, miR-371b-3p, miR-3959-3p, miR-323c, miR-24-3p, miR-326-3p, miR-335-5p, miR-412-3p, miR-2285k, miR-379-5p, miR-6395, miR-7975, miR-21c, miR-3065-5p, miR-374c-3p, novel\_69, miR-670-3p, miR-144-3p, miR-677, miR-3074-5p, novel\_68, miR-3120-3p, miR-483-3p, miR-466f-3p, miR-125a-5p, miR-7-5p, miR-17-5p, novel\_51, miR-106a-5p, miR-190a, miR-2285v, miR-432-3p, miR-2285r, miR-363-5p, miR-16-1-3p, miR-381-5p, miR-219a-1-3p, miR-138, miR-786g, miR-27b-3p, miR-181a-5p, miR-7b, miR-3154, miR-199b-5p, miR-1983, miR-412-3p, miR-141-3p, miR-216b-3p, miR-874-3p, miR-199a-5p, miR-29b-2-5p, miR-2284k, miR-130b-5p, miR-208b-5p, miR-6516-3p, miR-138-5p, miR-2284j, miR-3059-5p, miR-199b-5p, miR-2284w, miR-1260b, miR-323-3p, miR-188-3p, miR-125b-2-3p, miR-181a-5p, miR-542-3p, miR-1843b-5p, miR-2284x, miR-2284aa, miR-1260b, miR-138, miR-377-5p, novel\_78, novel\_116, miR-2284z, miR-147a, miR-210-3p, miR-2397-5p, novel\_17, miR-1260a, miR-543-5p, miR-200a-3p, miR-199b-5p, miR-466i-5p, miR-127-5p, miR-181b-5p, miR-2284m, miR-29b-2-5p, miR-5100, miR-130b-5p, miR-503-3p, miR-1271-3p, miR-199a-5p, miR-8485, miR-2432, miR-125b-2-3p, miR-377-5p

ZNF263 ENSOARGO(zinc fin.138, miR-377-5p, novel\_78, novel\_116, miR-2284z, miR-147a, miR-210-3p, miR-2397-5p, novel\_17, miR-1260a, miR-543-5p, miR-200a-3p, miR-199b-5p, miR-466i-5p, miR-127-5p, miR-181b-5p, miR-2284m, miR-29b-2-5p, miR-5100, miR-130b-5p, miR-503-3p, miR-1271-3p, miR-199a-5p, miR-8485, miR-2432, miR-125b-2-3p, miR-377-5p

FMOD ENSOARGO(fibromod.2, miR-1291, miR-299a-5p, miR-345-5p, miR-345-5p, miR-542-5p, miR-548e-3p, miR-2300a-5p, miR-105-1, novel\_116, miR-214-5p, miR-24-2-5p



miR-654-3p, let-7j, let-7a-2-3p, miR-130b-5p, miR-493-5p, miR-628-5p, miR-378a-5p, miR-196b-5p, miR-125a-5p, miR-224-5p, miR-377-3p, miR-190a, miR-2411-3p, miR-194a, miR-432-5p, miR-134-3p, miR-149-5p, miR-194-3p, miR-31-5p, miR-130a-3p, miR-339-5p, miR-26b-3p, miR-1260b, miR-2284x, miR-19b-2-5p, miR-432, miR-1843b-5p, miR-181a-5p, miR-450c-3p, miR-194-5p, miR-3071-5p, miR-211, miR-326-3p, miR-301b-3p, miR-1a-1-5p, miR-17-3p, miR-6119-3p, novel\_1, miR-502b, miR-199c, miR-502-5p, miR-6402, miR-485-3p, novel\_87, miR-299b-3p, miR-670-3p, miR-669, novel\_68, miR-3074-5p, miR-320b, miR-6516-3p, miR-505-3p, miR-2285ab, miR-1306, miR-18a-3p, miR-2285b, miR-490-3p, miR-192-3p, miR-29b-2-5p, miR-17-3p, miR-181b-5p, miR-1a-2-5p, novel\_127, miR-543-5p, miR-1260a, miR-181c-3p, miR-339a, miR-302a-5p, miR-9-5p, miR-450a-1-3p, miR-486-5p, novel\_121, miR-214-5p, miR-222, miR-299a-3p, miR-2285ad, novel\_79, miR-7641, let-7a-2-3p, miR-345-3p, miR-196a-5p, miR-3578, miR-218-2-3p, miR-23b-5p, miR-330-5p, miR-1260b, miR-193a-5p, miR-144-5p, miR-331-5p, miR-410-3p, miR-204-5p, miR-1-5p, miR-5100, miR-135a-1-3p, miR-125b-5p, miR-26c, miR-409-3p, miR-223-5p, miR-154b-5p, miR-874-3p, miR-125a, miR-10b-3p, let-7g-3p, miR-7144-5p, miR-190a-3p, miR-671-5p, miR-1814c, miR-331-5p, miR-23b, miR-1b-5p, miR-758-3p, miR-2310, miR-23a-3p, miR-33a-5p, miR-130b-3p, miR-3955-3p, miR-103a-2-5p, miR-199a-3p, miR-1306-5p, miR-326, miR-182-5p, miR-147a, miR-9788-3p, miR-221-3p, miR-199b-3p, novel\_4, novel\_78, miR-1388-5p, miR-101a-5p, miR-16-2-3p, miR-3120-5p, miR-484, miR-758-3p, miR-3962, miR-877-3p, novel\_111, miR-8095, miR-7705, miR-3059-5p, novel\_60, miR-3956-3p, miR-2285f, miR-194b-5p, miR-9-5p, miR-190b-5p, miR-181d-5p, miR-3968, miR-499a-5p, miR-2285t, miR-218-5p, miR-107-5p, miR-378a, miR-7857-3p, miR-2482-3p, miR-202-3p, miR-320d, let-7g-3p, miR-4429, let-7a-2-3p, miR-320b, miR-218-5p, miR-320a, miR-320c, let-7a-2-3p

CPA6

ENSOARGO(carboxyp

RGS22

ENSOARGO(regulato

miR-582-5p, miR-7144-5p, let-7g-3p, miR-2318, miR-200a-5p, miR-137-3p, miR-3613-5p, miR-488-3p, miR-15b-5p, novel\_25, miR-582-5p, miR-2355-5p, miR-154a-3p, miR-487a-3p, miR-378a-3p, miR-424-5p, miR-29b-3p, miR-338-3p, miR-378c, miR-3184-5p, miR-1197-3p, miR-214, miR-3607-3p, miR-16-5p, miR-6128, miR-378c, miR-378d, let-7a-2-3p, novel\_73, miR-378a-3p, miR-330-5p, miR-29d-3p, miR-378i, miR-2284z, miR-483-3p, miR-15a-5p, miR-340-5p, miR-378h, miR-487a-3p, miR-322-5p, miR-24-2-5p, miR-21-3p, miR-422a, miR-29a-5p, novel\_39, miR-146a-5p, miR-4286, miR-487a, miR-379-5p, miR-195a-5p, miR-378f, miR-146b-5p, miR-3963, miR-361-3p, miR-3082-5p, miR-29a-3p, miR-378e, miR-378g, miR-2404, miR-3596, miR-147-5p, miR-154-3p, miR-625-3p, miR-29a, miR-6119-3p, miR-301a-5p, miR-16a, miR-3613, miR-218-5p, miR-15a, miR-2284w, miR-326-3p, miR-423-5p, miR-1285-5p, miR-29c-3p, miR-3956-3p, novel\_60, miR-342-3p, miR-1839-5p, miR-497-5p, miR-2284aa, miR-29b, miR-16b, miR-378c, miR-1843b-5p, miR-7b-5p, miR-542-3p, miR-301b-5p, miR-378b, miR-432, miR-134-3p, miR-432-5p, miR-412-5p, miR-214-3p, miR-146b, miR-483-3p, miR-16b, miR-146a, miR-326, miR-7-5p, miR-342, let-7a-2-3p, miR-1b-5p, miR-539-3p, let-7j, miR-378d, miR-2483-5p, miR-668-3p, miR-2330-5p, miR-424-5p, miR-199b-5p, miR-106b-3p, miR-16b, miR-136-3p, miR-503-5p, miR-326, let-7a-2-3p, miR-2310, miR-424-5p, miR-497-5p, miR-3120-5p, miR-2889, miR-16b, miR-16-1-3p, miR-544a, miR-1a-3p, miR-7857, miR-125b-2-3p, miR-2284r, miR-223-3p, miR-1434-3p, miR-148b-5p, miR-544b, miR-539-5p, miR-503-5p, miR-3431, miR-340-3p, miR-7134-3p, miR-206, miR-379-3p, novel\_1, miR-16a, miR-382-5p, miR-15a, miR-218-5p, miR-326-3p, miR-199b-5p, miR-877-3p, miR-211, miR-371b-3p, miR-136-3p, miR-335-3p, miR-1983, miR-877-3p, miR-195a-5p, miR-147-3p, miR-412-3p, miR-18a-3p, miR-199b-5p, miR-670-3p, miR-320b, miR-211-5p, miR-26b-5p, miR-7-1-3p, miR-3074-5p, miR-20a-3p, miR-2484, novel\_127, miR-21-3p, miR-760-3p, miR-466i-5p, miR-219b-5p, miR-618, miR-26a-5p, miR-29a-5p, miR-199a-5p, miR-1957a, miR-125b-2-3p, miR-1, miR-345-3p, miR-503-5p, miR-16-1-3p, miR-218-1-3p, miR-148a-5p, let-7a-2-3p, miR-1193, miR-330-5p, novel\_133, miR-582-3p, miR-545-5p, miR-322-5p, miR-15a-5p, miR-18a-3p, miR-424-5p, miR-204-5p, miR-206-3p, miR-16-5p, miR-1306-5p, miR-3074-5p, miR-543-3p, miR-1814c, miR-671-5p, let-7g-3p, miR-199a-5p, miR-15b-5p, miR-544-3p, miR-216b-3p, miR-370-3p, miR-2285aa, miR-615-5p, miR-3068-3p, miR-874-3p

TSPAN3 ENSOARGO(tetraspa)

NCF2 ENSOARGO(neutroph)

miR-2330-3p, let-7b, let-7b-5p, miR-224-5p, miR-206-3p, miR-320e, miR-665, miR-135a-1-3p, let-7f, miR-874-5p, miR-450b-3p, miR-141-3p, let-7i-5p, miR-204-3p, miR-499b-3p, miR-3154, miR-137-3p, miR-2285c, miR-186-5p, miR-7144-5p, miR-625-5p, let-7g-3p, miR-345-3p, let-7g, miR-376a-5p, let-7c-5p, miR-345-3p, miR-200c, miR-200a-3p, let-7k, miR-107, let-7f-5p, miR-200c-3p, miR-98-5p, miR-1224-5p, miR-429-3p, miR-450a-1-3p, miR-545-5p, miR-200b, miR-7859, miR-505-5p, miR-1197-5p, miR-1961, miR-345-3p, let-7a-2-3p, miR-200b-3p, miR-582-3p, let-7d, novel\_120, miR-2447, novel\_111, miR-371b-3p, let-7i, miR-576-3p, miR-199c, miR-625-3p, miR-206, miR-6119-3p, miR-20a-3p, let-7d-5p, miR-670-3p, miR-374c-3p, miR-489, miR-499a-3p, miR-1306, miR-2285ab, miR-361-3p, let-7e-5p, miR-107, miR-299b-5p, miR-450b-3p, miR-33a-5p, miR-101b-3p, let-7a-5p, let-7a-2-3p, miR-6412, miR-2285r, novel\_51, miR-2411-3p, miR-1306-5p, miR-224-5p, let-7e, miR-26b-3p, miR-222-5p, miR-199b-3p, miR-103a-3p, miR-31-5p, miR-103, miR-2285e, miR-455-3p, let-7g-5p, miR-3431, miR-2285g, miR-374b-3p, novel\_23, miR-450c-3p, miR-223-3p, miR-484, miR-2284x, miR-664a, miR-502b, miR-22-5p, miR-2440, miR-2285y, miR-877-3p, miR-181c-5p, miR-326-3p, miR-181d-5p, miR-1271, miR-3958-5p, miR-96-5p, miR-410-5p, novel\_99, miR-485-5p, miR-582-5p, miR-1248, novel\_48, miR-335-3p, miR-299, miR-21a-3p, miR-3970, miR-139-5p, miR-378g, miR-582-5p, miR-140-5p, miR-139-5p, miR-552-3p, miR-181b-5p, miR-21-3p, miR-30b-3p, miR-326, novel\_51, miR-503-3p, miR-2285w, miR-369-3p, miR-299a-5p, miR-142-3p, miR-181a-5p, miR-330-5p, miR-197-3p, miR-134-3p, miR-3431, miR-1298-3p, miR-1271-5p, novel\_121, miR-216a-3p, novel\_116, miR-545-5p, miR-532-3p, miR-2284h-5p, novel\_78, miR-2285ad, miR-3955-5p

CD19

ENSOARGO(CD19 mol

GOT2

ENSOARGO( glutamic

miR-1343-3p, novel\_78, novel\_4, miR-2300a-5p, miR-5010-3p, miR-181b-2-3p, miR-9788-3p, miR-500-5p, miR-421, miR-2459, miR-6529a, miR-301b-5p, miR-323b, miR-758-3p, let-7a-5p, miR-424-5p, miR-127-3p, miR-33a-5p, miR-376b, miR-758-3p, miR-1b-5p, miR-342, miR-320b, miR-1306-5p, miR-29b-1-5p, miR-323b-3p, miR-1185-5p, miR-3955-3p, miR-214-3p, miR-103a-2-5p, let-7e, miR-20a-3p, miR-211-5p, miR-378g, let-7d-5p, miR-454-5p, miR-4443, miR-668-5p, miR-335-3p, miR-877-3p, miR-9-3p, novel\_60, miR-3956-3p, miR-219a-5p, miR-362-5p, novel\_82, miR-30b-5p, miR-382-3p, miR-2285n, miR-218-5p, miR-2285y, miR-107-5p, miR-301a-5p, miR-335, miR-490-5p, miR-3600, miR-340-5p, miR-15a-5p, miR-2284h-5p, novel\_83, miR-532-3p, miR-30c-5p, miR-2366, miR-1961, miR-2300b-3p, miR-193b-5p, miR-2904, miR-1197-5p, miR-188-3p, miR-142-3p, miR-33b-3p, miR-4429, miR-664-5p, miR-378d, miR-345-3p, miR-29b-1-5p, miR-181b-1-3p, miR-2432, miR-30b, miR-210-5p, miR-125b, miR-345-3p, miR-320d, miR-760-3p, miR-466i-5p, miR-98-5p, miR-30d, let-7k, miR-2331-3p, miR-216b-3p, miR-21-3p, miR-552-3p, miR-582-5p, miR-377-3p, miR-193b-3p, novel\_25, let-7i-5p, miR-877-5p, miR-15b-5p, miR-3613-5p, miR-500a-3p, miR-27b-5p, miR-30d-5p, miR-411, miR-345-5p, miR-30f, miR-339b, let-7b, miR-145a-3p, miR-214, miR-2330-3p, miR-346, miR-29c-5p, miR-224-5p, let-7b-5p, let-7f, miR-29d-5p, miR-324-3p, miR-450b-3p, miR-17-3p, miR-487a-5p, miR-500, miR-103a-3p, miR-133b-5p, miR-339-5p, miR-26b-3p, miR-3431, miR-134-3p, let-7g-5p, miR-194-3p, miR-103, miR-2355-3p, miR-223-3p, miR-1843b-5p, miR-450c-3p, miR-197-3p, miR-374b-3p, novel\_23, miR-138, miR-2284ab, miR-497-5p, miR-654-3p, miR-2284l, miR-345-5p, miR-224-5p, miR-377-3p, miR-105-5p, novel\_51, miR-2411-3p, miR-378a-5p, miR-1343-5p, miR-125a-5p, miR-193a-3p, novel\_68, miR-3120-3p, miR-670-3p, miR-374c-3p, miR-6740-5p, miR-1973, novel\_82, miR-147-5p, miR-487a-5p, miR-2285t, miR-208b-5p, novel\_1, miR-1839-3p, miR-4510, miR-129b-3p, novel\_99, miR-1827, miR-339b, miR-876-3p, miR-10b-3p, miR-3120-3p, miR-216b-3p, miR-139-5p, miR-6130, miR-139-5p, miR-374c-3p, miR-2404, miR-339a, miR-205-5p, miR-30b-3p, miR-153-3p, novel\_124, miR-376b, miR-1839-3p, miR-216c-5p, miR-188-3p, novel\_23, miR-5703, miR-197-3p, miR-2300b-3p, miR-708-3p, miR-3120-5p, novel\_79, miR-339-5p, novel\_78, miR-6517, miR-133b-5p, novel\_121, miR-411-5p, miR-153

ZNF174

ENSOARGO(zinc fin.

ADH6

ENSOARGO(alcohol

miR-107, miR-195a-5p, miR-135b-5p, miR-2285ab, miR-2387, miR-378b, miR-21c, miR-146b-3p, miR-7-1-3p, miR-203b-5p, miR-502b, miR-15a, miR-133a-5p, miR-16a, miR-33a-3p, miR-24-3p, miR-326-3p, miR-2428, novel\_120, miR-2285x, miR-30b-3p, miR-138, miR-21-5p, miR-181a-5p, miR-1434-3p, miR-3071-5p, miR-145a-5p, miR-432-5p, miR-103, miR-133b-5p, miR-124-5p, miR-224-5p, miR-330-3p, miR-197-5p, miR-539-3p, miR-296-3p, miR-101-5p, let-7g-3p, novel\_48, miR-1814c, miR-485-5p, miR-488-3p, miR-381-3p, miR-769, miR-487a-3p, miR-138-5p, miR-28-5p, miR-486b-3p, miR-1-5p, miR-135a-1-3p, miR-331-3p, miR-135a-5p, miR-10b-3p, miR-1306-5p, miR-6128, miR-3607-3p, miR-133a-3p, miR-103b, miR-582-3p, miR-300, let-7a-2-3p, miR-3578, miR-218-2-3p, miR-30a-5p, miR-2411-5p, miR-6516-5p, miR-222, miR-2898, miR-200c-3p, miR-107, miR-2285af, miR-200c, miR-30c-2-3p, miR-217, miR-1957a, miR-2284a, miR-3529-3p, miR-4286, novel\_94, miR-7857-3p, miR-489, miR-541-5p, miR-7977, miR-4726-5p, miR-335, miR-30b-5p, miR-371a-5p, miR-769-5p, miR-8095, miR-154a, novel\_60, miR-2285f, miR-101a-5p, miR-450b-5p, miR-3120-5p, miR-484, miR-30b-3p, miR-125b-2-3p, miR-142-3p, miR-216a-3p, miR-221-3p, miR-151a-3p, miR-3955-3p, novel\_103, miR-1306-5p, miR-326, miR-362-3p, miR-30c-1-3p, miR-3187-3p, miR-424-5p, miR-2330-5p, let-7g-3p, miR-133b-3p, miR-2312, miR-154b-3p, miR-30f, novel\_99, miR-27b-5p, miR-6516, miR-6130, miR-139-5p, miR-22-3p, miR-877-5p, miR-532-5p, miR-6516-3p, miR-664a, miR-208b-5p, miR-708-5p, miR-424-5p, miR-222-3p, miR-369-5p, miR-324-3p, miR-145a-3p, miR-4510, miR-362-3p, miR-2300b-3p, miR-2904, miR-1193, miR-487a-3p, miR-15a-5p, novel\_83, miR-3600, miR-485-3p, miR-30d, miR-30b-3p, miR-2411, miR-2432, miR-216c-5p, miR-2319a, miR-1306, miR-150-5p, miR-6535, miR-329-5p, miR-379-3p, miR-142b, novel\_87, miR-1a-1-5p, miR-335-5p, miR-16b, miR-16-1-3p, miR-2285p, miR-145a-5p, miR-145b

ZC2HC1B ENSOARGO(zinc fin.3p, miR-4286, novel\_94, miR-7857-3p, miR-489, miR-541-5p, miR-7977, miR-4726-5p, miR-335, miR-30b-5p, miR-371a-5p, miR-769-5p, miR-8095, miR-154a, novel\_60, miR-2285f, miR-101a-5p, miR-450b-5p, miR-3120-5p, miR-484, miR-30b-3p, miR-125b-2-3p, miR-142-3p, miR-216a-3p, miR-221-3p, miR-151a-3p, miR-3955-3p, novel\_103, miR-1306-5p, miR-326, miR-362-3p, miR-30c-1-3p, miR-3187-3p, miR-424-5p, miR-2330-5p, let-7g-3p, miR-133b-3p, miR-2312, miR-154b-3p, miR-30f, novel\_99, miR-27b-5p, miR-6516, miR-6130, miR-139-5p, miR-22-3p, miR-877-5p, miR-532-5p, miR-6516-3p, miR-664a, miR-208b-5p, miR-708-5p, miR-424-5p, miR-222-3p, miR-369-5p, miR-324-3p, miR-145a-3p, miR-4510, miR-362-3p, miR-2300b-3p, miR-2904, miR-1193, miR-487a-3p, miR-15a-5p, novel\_83, miR-3600, miR-485-3p, miR-30d, miR-30b-3p, miR-2411, miR-2432, miR-216c-5p, miR-2319a, miR-1306, miR-150-5p, miR-6535, miR-329-5p, miR-379-3p, miR-142b, novel\_87, miR-1a-1-5p, miR-335-5p, miR-16b, miR-16-1-3p, miR-2285p, miR-145a-5p, miR-145b

MDFIC ENSOARGO(MyoD fam miR-2285p, miR-145a-5p, miR-145b

miR-4792, novel\_68, miR-20a-3p, miR-541-5p, miR-211-5p, miR-378g, miR-146b-3p, miR-374c-3p, miR-3082-5p, miR-203-3p, miR-144-5p, miR-669, miR-129b-5p, miR-6516-3p, miR-195a-5p, miR-135b-5p, miR-541-3p, miR-3957-3p, novel\_101, miR-452-5p, miR-211, miR-24-3p, miR-323c, miR-423-5p, novel\_27, miR-8095, miR-2428, miR-219a-2-3p, miR-15a, miR-28c, miR-16a, miR-3968, miR-31-5p, novel\_4, miR-26b-3p, miR-134-3p, miR-194-3p, miR-149-5p, miR-455-3p, miR-484, miR-708-3p, miR-653, miR-541, miR-374b-3p, miR-30b-3p, miR-1388-5p, miR-30b-3p, miR-380-3p, miR-16b, miR-497-5p, miR-424-5p, miR-363-5p, miR-33a-5p, miR-654-3p, miR-3187-3p, miR-503-3p, miR-377-3p, miR-29b-1-5p, miR-16b, miR-3955-3p, miR-660, miR-660-5p, miR-296-3p, miR-377-3p, miR-331-5p, miR-374c-3p, miR-6130, miR-15b-5p, miR-10b-3p, miR-7144-5p, miR-885-3p, miR-23a-5p, miR-671-5p, miR-1827, miR-539-5p, miR-4510, miR-145a-3p, miR-16-5p, miR-6128, miR-144-5p, miR-3184-5p, miR-219b-3p, miR-135a-5p, miR-320e, miR-29b-2-5p, miR-6516-3p, miR-664a, miR-708-5p, miR-424-5p, miR-204-5p, miR-486b-3p, miR-28-5p, miR-3600, miR-322-5p, miR-15a-5p, miR-532-3p, novel\_83, miR-2904, miR-1197-5p, miR-5703, miR-885-3p, miR-184-3p, miR-218-1-3p, miR-378d, miR-29b-2-5p, miR-2385-3p, miR-376a-5p, miR-29b-1-5p, miR-450b-5p, miR-28b, miR-486-3p, miR-200a, miR-2432, miR-219-3p, miR-2285p, miR-92a-1-5p, miR-2898, miR-433-3p, let-7g-3p, miR-1827, miR-885-3p, miR-1895, miR-504-5p, miR-2331-3p, miR-552-3p, miR-3065-3p, miR-193b-3p, miR-323-5p, miR-132-5p, miR-151b, miR-22-3p, miR-320e, miR-132-5p, miR-17-3p, miR-874-5p, miR-145a-3p, novel\_44, miR-3184-5p, miR-2366, miR-362-3p, miR-34a-5p, miR-378d, miR-664-5p, miR-133a-3p, miR-151-5p, novel\_17, miR-125b, miR-216a-5p, miR-760-3p, miR-34b-5p, miR-345-3p, miR-2887, miR-486-3p, miR-361-3p, miR-378j, miR-504, novel\_94, miR-3064-5p, miR-7977, miR-3082-5p, miR-378g, miR-4443, miR-2440, miR-4726-5p, miR-541-3p, miR-6527, miR-877-3p, miR-361-3p, miR-362-5p, miR-423-5p, miR-541, miR-329-3p, miR-758-3p, miR-30b-3p, miR-362-3p, miR-3120-5p, miR-1343-3p, miR-222-5p, miR-147a, miR-500-5p, miR-455-3p, novel\_19, miR-362-3p, miR-3085-3p, miR-2330-5p, miR-758-3p, miR-8485, miR-4532, miR-362-5p, miR-329a, miR-1248, miR-485-5p, miR-23a-5p, miR-141-3p, miR-125a, miR-370-3p, miR-2355-5p, miR-34c-5p, miR-135a-5p, miR-125b-5p, novel\_9, miR-138-5p, miR-134-5p, miR-486b-3p, miR-1197-3p, miR-1260b, miR-134, miR-885-3p, miR-6517, miR-214-5p, miR-134-5p, miR-1260a, miR-205-5p, miR-17-3p, miR-2898, miR-200a-3p, miR-543-5p, miR-4286, miR-181a-2-3p, miR-3064-5p, miR-1271-3p, novel\_39, miR-3065-3p, miR-2387, miR-135b-5p, novel\_68, miR-3120-3p, miR-670-3p, miR-34b, miR-323a-5p, miR-6535, miR-34c, miR-203b-5p, miR-17-3p, miR-193b-3p, miR-371b-3p, miR-24-3p, miR-449a, miR-7b-5p, miR-22-3p, miR-1260b, miR-30b-3p, miR-138, miR-380-3p, miR-744-5p, miR-6239, miR-133b-5p, miR-665, miR-134-3p, novel\_116, miR-194-3p, miR-7-5p, miR-193a-3p, miR-125a-5p, miR-432-3p, miR-185-5p, miR-490-5p, miR-143-3p, miR-671-5p

TMEM176A ENSOARGO( transmemi

SLURP1 ENSOARGO( secreted

AKR1A1 ENSOARGO( aldo-ket

|        |                                            |                                                                                                                                                                                                                                                                                                                                                                                                                                                                                                                                                                                                                                                                                                                                                                                                                                                                                                                                                                                                                                                                                                                                                                                                                                                                                                                                                                                                                                                                                                                                                                                                                                                             |
|--------|--------------------------------------------|-------------------------------------------------------------------------------------------------------------------------------------------------------------------------------------------------------------------------------------------------------------------------------------------------------------------------------------------------------------------------------------------------------------------------------------------------------------------------------------------------------------------------------------------------------------------------------------------------------------------------------------------------------------------------------------------------------------------------------------------------------------------------------------------------------------------------------------------------------------------------------------------------------------------------------------------------------------------------------------------------------------------------------------------------------------------------------------------------------------------------------------------------------------------------------------------------------------------------------------------------------------------------------------------------------------------------------------------------------------------------------------------------------------------------------------------------------------------------------------------------------------------------------------------------------------------------------------------------------------------------------------------------------------|
| NKAIN1 | ENSOARGO(Na <sup>+</sup> /K <sup>+</sup> t | <p>miR-423-5p, miR-326-3p, miR-2428, miR-877-3p, miR-24-3p, miR-2285f, miR-17-3p, miR-541-3p, miR-136-5p, miR-18a-3p, miR-2285ab, miR-361-3p, miR-3141, miR-146b-3p, miR-3082-5p, miR-411b-3p, miR-124-5p, miR-483-3p, miR-3141, miR-2331-5p, miR-326, miR-377-3p, miR-432-3p, miR-22841, miR-432-3p, miR-574-3p, miR-30b-3p, miR-138, miR-1260b, miR-30b-3p, miR-541, miR-149-5p, miR-2459, miR-340-3p, novel_4, miR-4492, miR-486b-3p, miR-138-5p, miR-17-3p, miR-664a, miR-1843b-3p, miR-2433, miR-3184-5p, miR-1260b, miR-665-5p, novel_42, miR-4510, miR-129-2-3p, miR-885-3p, miR-625-5p, miR-7144-5p, miR-485-5p, miR-2312, miR-129b-3p, miR-137-3p, miR-3154, miR-301, miR-377-3p, miR-6130, miR-365a-3p, miR-2285aa, miR-2355-5p, miR-615-5p, miR-532-5p, miR-3653-3p, novel_127, miR-17-3p, miR-760-3p, miR-466i-5p, miR-324-3p, miR-1260a, miR-210-5p, miR-486-3p, miR-2285w, miR-664-5p, miR-378d, miR-885-3p, miR-2904, miR-1197-5p, miR-5703, miR-330-5p, miR-1193, novel_133, miR-2284h-5p, miR-1247-5p, miR-129-1-3p, novel_121, miR-505-5p, miR-483-3p, miR-18a-3p, miR-6517, miR-4324, miR-576-3p, miR-382-5p, miR-342-3p, novel_101, miR-214, novel_44, miR-1307-3p, miR-1285-5p, miR-329a, miR-625-5p, miR-485-5p, miR-30c-1-3p, miR-499b-5p, miR-377-3p, miR-299b-3p, miR-411b-3p, miR-342, miR-377-3p, miR-3071-3p, miR-362-3p, miR-500a-5p, miR-30c-2-3p, miR-124-5p, miR-153-3p, miR-214-3p, miR-299-3p, miR-466f-3p, miR-30c-1-3p, miR-2285r, miR-125b-2-3p, miR-22841, miR-200a, miR-2411, miR-8485, novel_39, miR-2432, miR-329-3p, miR-362-3p, miR-412-3p, miR-362-3p, miR-299a-3p, miR-7641, miR-412, miR-153, miR-2411-5p</p> |
| CATHL3 | ENSOARGO(cathelic                          |                                                                                                                                                                                                                                                                                                                                                                                                                                                                                                                                                                                                                                                                                                                                                                                                                                                                                                                                                                                                                                                                                                                                                                                                                                                                                                                                                                                                                                                                                                                                                                                                                                                             |

miR-2285n, miR-301a-5p, miR-361-3p, miR-3956-3p, novel\_60, miR-668-5p, miR-1983, miR-361-3p, miR-378g, miR-20a-3p, miR-25-5p, miR-214-3p, miR-146b, miR-431-5p, miR-1306-5p, miR-342, miR-16b, miR-3187-3p, miR-4532, miR-2330-5p, miR-424-5p, miR-1388-3p, miR-574-3p, miR-23a-3p, miR-3120-5p, miR-10b, miR-301b-5p, miR-296-5p, miR-30b-3p, miR-147a, miR-2459, miR-421, miR-2300a-5p, miR-1343-3p, miR-330-3p, miR-664a, miR-424-5p, miR-874-5p, miR-664a-5p, miR-665, miR-324-3p, miR-6525, miR-10b-5p, miR-214, miR-1827, miR-129b-3p, miR-323-5p, miR-10a, miR-15b-5p, novel\_32, miR-22-3p, miR-221-5p, miR-296-3p, miR-2484, miR-221-5p, miR-210-5p, miR-125b, miR-324-3p, miR-125b-2-3p, miR-664b-3p, miR-486-3p, miR-146a-5p, miR-345-3p, miR-19b-3p, miR-2366, miR-126-3p, novel\_133, miR-140-3p, miR-188-3p, miR-2904, miR-15a-5p, miR-23c, miR-148b-3p, miR-23b-3p, novel\_83, miR-18a-3p, miR-505-3p, miR-128-1-5p, miR-625-3p, miR-15a, miR-16a, miR-24-3p, miR-371b-3p, miR-342-3p, miR-412-3p, miR-19a-3p, miR-1291, miR-195a-5p, miR-505-3p, miR-146b-5p, miR-9851-3p, miR-2387, miR-148a-3p, miR-18a-3p, miR-150-5p, miR-1306, miR-411b-3p, novel\_69, miR-2404, miR-323a-5p, miR-7-1-3p, miR-10a-5p, miR-378a-5p, miR-125a-5p, miR-146a, novel\_51, miR-330-3p, miR-6240, miR-363-5p, miR-30b-3p, miR-138, miR-16b, miR-2889, miR-497-5p, miR-873a-5p, miR-22-3p, miR-197-3p, miR-134-3p, miR-2355-3p, miR-194-3p, miR-149-5p, miR-767-5p, miR-138-5p, miR-486b-3p, miR-2433, miR-331-3p, miR-125b-5p, miR-1306-5p, miR-193a-5p, miR-16-5p, miR-767, miR-23b, miR-125a, miR-141-3p, miR-2355-5p, miR-542-5p, novel\_127, miR-200a-3p, miR-152-3p, miR-200a, miR-181a-2-3p, miR-10a-5p, miR-322-5p, miR-505-5p, miR-486-5p, miR-214-5p, miR-6517, miR-431



miR-181b-2-3p, miR-1343-3p, miR-330-3p, miR-118b-3p, miR-500-5p, miR-148b-5p, miR-539-5p, miR-376b-3p, miR-484, miR-2284r, miR-21b, miR-101c, miR-101a-5p, miR-2426, miR-1388-5p, miR-652-5p, miR-33a-5p, miR-106a-5p, miR-8485, miR-30c-1-3p, miR-182-5p, miR-106b-5p, miR-505, miR-2957, miR-320b, miR-199b-5p, miR-3955-3p, miR-7977, miR-20a-3p, miR-139-5p, miR-376d, miR-1185-2-3p, miR-7857-3p, miR-199b-5p, miR-140-5p, miR-493-5p, miR-376a-3p, miR-96-5p, miR-190b-5p, miR-181d-5p, miR-154a, novel\_111, miR-362-5p, miR-2440, miR-3968, miR-30d-3p, miR-505-3p, miR-380-5p, miR-3600, miR-106a, miR-532-3p, miR-23c, miR-23b-3p, miR-5703, miR-188-3p, miR-30c-5p, miR-34a-5p, miR-148a-5p, miR-4429, miR-33b-3p, miR-20a, miR-329a-5p, miR-2424, miR-2411, miR-181b-1-3p, miR-377-5p, miR-376a-5p, miR-92a-1-5p, miR-125b, miR-500a-5p, miR-216a-5p, miR-210-5p, miR-299-3p, miR-21-3p, miR-30d, miR-34b-5p, miR-30b-3p, miR-99a-3p, miR-320d, miR-106a, miR-182-5p, miR-545-3p, miR-30c-1-3p, novel\_25, miR-216b-5p, miR-139-5p, miR-6130, miR-6516, miR-377-3p, miR-582-5p, miR-30d-5p, miR-21a-3p, miR-582-5p, miR-30f, miR-18a-5p, miR-1271, miR-4510, miR-539-5p, miR-338-3p, miR-181c-5p, miR-6525, miR-30a-3p, miR-30e-3p, miR-130b-5p, miR-190a-5p, miR-664a, miR-17-3p, miR-377-5p, miR-665, miR-103a-3p, miR-31-5p, miR-103, miR-20b, miR-185-5p, miR-181a-5p, miR-873a-5p, miR-29b, miR-21-5p, let-7f-2-3p, let-7f-2-3p, miR-382, miR-6240, miR-380-5p, miR-130b-5p, let-7j, miR-17-5p, miR-106a-5p, miR-105-5p, miR-190a, miR-330-3p, miR-377-3p, miR-466f-3p, miR-125a-5p, miR-3120-3p, miR-329-5p, miR-181b-3p, miR-677, miR-320c, miR-299b-3p, miR-670-3p, miR-29a-3p, miR-34b, miR-146b-3p, miR-21c, miR-376b-3p, miR-3065-5p, miR-150-5p, miR-2387, miR-18b, miR-505-3p, miR-6516-3p, miR-107, miR-758-5p, miR-29c-3p, miR-17-3p, miR-105-3p, miR-2285, miR-199b-5p, miR-140a, miR-21-

miR-301b, miR-100-3p, miR-2010b, miR-311-3p, miR-1000-3p, miR-126b-5p, miR-3596, miR-489, miR-2483-3p, miR-500-3p, miR-27a-3p, miR-4443, miR-361-3p, miR-199b-5p, miR-378j, miR-493-5p, miR-1983, miR-2447, miR-885-5p, miR-541-3p, miR-6527, miR-181d-5p, miR-361-3p, miR-1285-5p, miR-8095, miR-502-3p, miR-423-5p, miR-2285n, miR-628-3p, miR-199b-3p, miR-1343-3p, miR-151a-3p, miR-27a-3p, miR-222-5p, miR-147a, miR-1298-3p, miR-421, miR-126a-5p, miR-541, miR-143-5p, miR-501-3p, miR-2426, miR-21b, miR-124a, miR-382-3p, miR-101b-3p, miR-106a-5p, miR-23a-3p, miR-33a-5p, miR-744-3p, miR-30c-1-3p, miR-8485, miR-2310, miR-320b, miR-106b-5p, miR-199b-5p, miR-214-3p, miR-30c-1-3p, miR-221-5p, miR-548o-3p, miR-216b-5p, miR-139-5p, miR-204-3p, miR-22-3p, miR-151b, miR-155-5p, miR-30d-5p, let-7g-3p, miR-543-3p, miR-186-5p, miR-1827, miR-145a-3p, miR-3074-5p, miR-214, miR-122-5p, miR-3184-5p, miR-181c-5p, miR-338-3p, miR-151-3p, miR-320e, miR-3604, miR-665, novel\_74, miR-155-5p, miR-17-3p, miR-208b-5p, miR-548e-3p, miR-106a, miR-7859, miR-23b-3p, miR-148b-3p, miR-222-5p, miR-23c, miR-2284h-5p, miR-151-5p, novel\_133, miR-376a-5p, miR-124-3p, miR-2904, miR-1434-5p, miR-140-3p, miR-4429, miR-19b-3p, miR-183-5p, miR-2285w, miR-20a, miR-345-3p, miR-664b-3p, miR-125b-2-3p, miR-320d, miR-106a, miR-221-5p, miR-21-3p, miR-3074-5p, miR-670-3p, miR-677, miR-320c, miR-148a-3p, miR-2387, miR-3970, miR-216a-3p, miR-1291, miR-412-3p, miR-19a-3p, miR-376a-2-5p, miR-136-3p, miR-17-3p, miR-199b-5p, miR-576-3p, miR-6402, miR-20a-5p, novel\_1, miR-203b-5p, miR-147-5p, miR-199c, miR-31-5p, miR-133b-5p, miR-412-5p, miR-185-5p, miR-20b, miR-223-3p, miR-181a-5p, miR-22-3p, novel\_23, miR-1260b, miR-27b-3p, miR-2889, miR-2284x, miR-493-5p, miR-363-5p, miR-628-5p, let-7a-2-3p, miR-197-5p, miR-PIP4K2A ENSOARGO( phosphat 106a-5p, miR-17-5p, miR-124-5p, miR-452-5p, miR-466f-3p, miR-

miR-2428, novel\_27, miR-326-3p, miR-135a-2-3p, miR-17-3p, miR-2285x, miR-1193, novel\_1, miR-502b, miR-147-5p, miR-199c, miR-203b-5p, miR-6402, miR-670-3p, miR-323a-5p, miR-378b, miR-320b, miR-1291, miR-450b-3p, miR-6395, miR-9851-3p, miR-18b, miR-2387, miR-654-3p, miR-466f-3p, miR-125a-5p, miR-503-5p, miR-455-5p, miR-503-5p, miR-185-5p, miR-544b, miR-6238, miR-187-3p, miR-30b-3p, miR-138, miR-455-5p, miR-181a-5p, miR-1434-3p, miR-873a-5p, miR-194-5p, miR-3071-5p, miR-374b-3p, miR-2903, miR-145-3p, miR-378c, miR-133a-3p, miR-138-5p, miR-410-3p, miR-370-5p, miR-410-5p, miR-409-3p, miR-144, miR-769, miR-374c-3p, miR-199a-5p, miR-370-3p, miR-485-5p, miR-3074-1-3p, miR-7144-5p, miR-23a-5p, miR-18a, miR-3154, miR-2284a, miR-199a-5p, miR-2403, miR-4286, miR-181b-5p, miR-17-3p, miR-450a-2-3p, miR-2285af, miR-30c-2-3p, miR-378h, miR-128-3p, miR-105-2, miR-134, miR-345-3p, miR-501-3p, miR-30a-5p, miR-218-2-3p, miR-502-3p, miR-212-3p, miR-3059-5p, miR-194b-5p, miR-181d-5p, miR-4726-5p, miR-7134-3p, miR-30b-5p, miR-382-3p, miR-769-5p, miR-378e, miR-27a-3p, miR-7977, miR-199b-5p, miR-30c-1-3p, miR-491-3p, miR-193a, miR-1306-5p, novel\_115, novel\_103, miR-326, miR-362-3p, miR-142-3p, miR-216a-3p, miR-9788-3p, miR-105-1, miR-409b, miR-222-5p, miR-27a-3p, miR-101a-5p, miR-2426, miR-544a, miR-378c, miR-143-5p, miR-378b, miR-30b-3p, miR-7857, miR-6134, miR-338-3p, miR-4510, miR-145a-3p, miR-378c, miR-3074-2-3p, miR-6516-3p, miR-664a, miR-17-3p, miR-155-5p, miR-139-5p, miR-323-5p, miR-6130, miR-544-3p, miR-155-5p, miR-204-3p, novel\_32, miR-22-3p, miR-378a-3p, miR-221-5p, miR-370-5p, miR-30f, miR-18a-5p, miR-133b-3p, miR-582-5p, miR-466i-5p, miR-760-3p, miR-21-3p, miR-30d, miR-221-5p, miR-30b-3p, miR-125b, miR-148b-3p, miR-362-3p, miR-2300b-3p, novel\_133, miR-140-3p, miR-5703, miR-2904, miR-124-3p, miR-431, novel\_83, miR-148b-5p, miR-194-3p, novel\_133, miR-19b-2-5p, miR-2284r, miR-541, miR-133a-3p, miR-218-1-3p, miR-148a-5p, miR-493-3p, miR-2385-3p, miR-29b-2-5p, miR-494-3p, miR-3065-3p, miR-2432, miR-654-3p, miR-376a-5p, miR-148b-5p, miR-197-5p, miR-3071-3p, miR-2957, miR-219-3p, miR-431-5p, miR-370-3p, miR-3065-3p, miR-3120-3p, miR-615-5p, miR-129b-3p, miR-361-3p, miR-1983, miR-485-5p, miR-1248, miR-410-5p, miR-299b-5p, miR-412-3p, miR-3958-5p, miR-6128, miR-495-3p, miR-3074-2-3p, miR-541-3p, miR-3184-5p, miR-423-5p, miR-219a-2-3p, miR-2428, miR-2285m, miR-361-3p, miR-19b-1-5p, miR-219b-3p, miR-425-5p, miR-665, miR-29b-2-5p, miR-410-5p, novel\_82, miR-15b-3p, miR-203b-5p, miR-2285t, miR-628-3p, miR-664a

miR-33a-5p, miR-2330-5p, miR-424-5p, miR-503-5p, miR-130b-5p, miR-1343-5p, miR-16b, novel\_51, miR-217, novel\_115, miR-503-5p, miR-503-5p, miR-15a-5p, miR-322-5p, miR-6517, miR-497-5p, miR-16b, miR-217-5p, miR-1343-5p, miR-2904, miR-541, miR-1285-5p, miR-346, miR-16-5p, miR-541-3p, novel\_42, miR-130b-5p, miR-147-5p, miR-502b, miR-424-5p, miR-331-3p, miR-16a, miR-15a, miR-15b-5p, miR-20a-3p, miR-195a-5p, miR-7144-5p

CDH5 ENSOARGO(cadherin)

GNB1 ENSOARGO(guanine)

PITPNM3 ENSOARGO(PITPNM)

|        |                   |                                                                                                                                                                                                                                                                                                                                                                                                                                                                                                                                                                                                                                                                                                                                                                                                                                                                                                                             |
|--------|-------------------|-----------------------------------------------------------------------------------------------------------------------------------------------------------------------------------------------------------------------------------------------------------------------------------------------------------------------------------------------------------------------------------------------------------------------------------------------------------------------------------------------------------------------------------------------------------------------------------------------------------------------------------------------------------------------------------------------------------------------------------------------------------------------------------------------------------------------------------------------------------------------------------------------------------------------------|
| VSTM4  | ENSOARGO(V-set an | miR-532-3p, novel_83, miR-2355-3p, novel_69, miR-30c-1-3p, miR-548w, miR-1343-3p, miR-1260b, miR-124-3p, miR-2904, miR-193b-5p, miR-193a, miR-30c-1-3p, miR-1260b, miR-24-3p, miR-124a, miR-1973, miR-30c-2-3p, miR-4324, miR-1260a miR-3068-3p, miR-874-3p, miR-204-3p, miR-17-5p, miR-320a, miR-93-5p, miR-2285c, miR-20b-5p, miR-2312, miR-2330-3p, miR-3074-2-3p, miR-1271, miR-206-3p, miR-93, miR-320e, miR-219b-3p, miR-34c-3p, miR-2285j, miR-129-5p, miR-4492, miR-212-5p, miR-106a, miR-18a-3p, novel_83, miR-1271-5p, miR-330-5p, miR-1197-5p, miR-4429, miR-493-3p, miR-181a-2-3p, miR-1, miR-20a, miR-3529-3p, miR-2285b, miR-29b-1-5p, miR-185-3p, miR-219-3p, novel_127, miR-543-5p, miR-466i-5p, miR-106a, miR-                                                                                                                                                                                             |
| CLUAP1 | ENSOARGO(clusteri | 320d, miR-7-1-3p, miR-320b, miR-320c, miR-3082-5p, miR-18a-3p, miR-3065-5p, miR-2285ab, miR-361-3p, miR-96-5p, miR-2285f, miR-2447, miR-219a-2-3p, miR-326-3p, miR-20a-5p, miR-147-5p, miR-206, novel_1, miR-499a-5p, miR-145b, miR-105-1, miR-20b, miR-2285e, miR-2285g, miR-145a-5p, miR-1a-3p, miR-7b-5p, miR-744-3p, miR-668-3p, miR-106a-5p, miR-2285r, novel_51, miR-106b-5p, miR-17-5p, miR-106a-5p, miR-505, miR-105-5p, miR-29b-1-5p, miR-326, miR-7-5p, miR-320b, miR-378a-5p miR-374b-3p, miR-21b, miR-1839-5p, miR-380-3p, miR-2426, miR-421, miR-412-5p, miR-147a, miR-197-5p, miR-146a, miR-146b, miR-452-5p, miR-196b-5p, miR-628-5p, miR-382-3p, let-7a-2-3p, miR-361-3p, miR-2387, miR-146b-5p, miR-335-3p, miR-1983, miR-379-5p, miR-412-3p, miR-541-5p, miR-669, miR-146b-3p, miR-133a-5p, miR-28c, miR-374a-3p, miR-335, miR-1193, miR-3059-5p, miR-335-5p, miR-423-5p, miR-8095, miR-7134-5p, miR-23b- |
| PSMG2  | ENSOARGO(proteaso | 5p, novel_133, miR-196a-5p, miR-664-5p, miR-361-5p, let-7a-2-3p, miR-184-3p, miR-423-3p, miR-545-5p, miR-582-3p, miR-7859, miR-185-3p, miR-6119-5p, miR-3529-3p, miR-2432, miR-146a-5p, miR-28b, miR-376a-5p, miR-3154, miR-485-5p, miR-10b-3p, let-7g-3p, let-7g-3p, miR-2285aa, miR-370-5p, miR-2355-5p, miR-296-3p, miR-6130, miR-370-5p, miR-708-5p, miR-31-3p, miR-374b-3p, miR-28-5p, miR-6128, miR-3607-3p, miR-4510, miR-3184-5p, miR-6134, miR-374a-3p, miR-1197-3p                                                                                                                                                                                                                                                                                                                                                                                                                                                |

miR-2285c, miR-2312, miR-186-5p, miR-378a-3p, miR-370-5p, miR-21-3p, miR-544-3p, miR-139-5p, miR-6130, miR-22-3p, let-7i-5p, let-7f, miR-19b-1-5p, let-7b, miR-378c, miR-3074-5p, miR-4510, let-7b-5p, miR-338-3p, miR-378i, novel\_133, miR-2366, miR-1961, miR-2300b-3p, miR-2904, miR-1197-5p, miR-378a-3p, miR-5703, miR-4429, miR-148a-5p, miR-2284u, miR-125b, miR-422a, miR-345-3p, miR-320d, miR-98-5p, miR-30b-3p, miR-299-3p, let-7k, miR-216c-5p, miR-329a-5p, miR-29b-1-5p, miR-486-3p, miR-146a-5p, miR-1983, miR-9-3p, miR-2284g, miR-139-5p, miR-211-5p, miR-378g, miR-378e, miR-203-3p, let-7d-5p, miR-4443, miR-2285y, miR-301a-5p, miR-2285t, novel\_60, miR-3956-3p, miR-2285f, miR-9-3p, miR-378b, miR-301b-5p, miR-30b-3p, miR-378c, miR-544a, miR-101c, miR-9788-3p, miR-148b-5p, miR-2285e, miR-320b, novel\_115, miR-1306-5p, miR-29b-1-5p, miR-491-5p, miR-3955-3p, miR-146b, let-7e, let-7a-5p, miR-382-3p, miR-744-3p, miR-378d, miR-3154, miR-320a, miR-1248, miR-125a, miR-1271, miR-615-5p, miR-370-5p, miR-331-3p, miR-125b-5p, miR-204-5p, miR-486b-3p, miR-378c, miR-345-3p, let-7d, miR-2285ad, miR-299a-3p, miR-24-2-5p, miR-378h, miR-2285af, let-7c-5p, miR-127-5p, let-7f-5p, novel\_96, miR-148b-5p, let-7g, novel\_39, miR-2284y, miR-2284a, miR-2285ab, miR-1306, miR-412-3p, miR-146b-5p, miR-378f, let-7e-5p, miR-329-5p, miR-3074-5p, miR-299b-3p, novel\_69, miR-320c, miR-669, miR-6535, miR-576-3p, let-7i, miR-22-5p, miR-147-5p, miR-1193, miR-211, miR-24-3p, miR-2428, miR-19b-2-5p, miR-22-3p, miR-30b-3p, miR-219a-1-3p, miR-188-5p, miR-412-5p, miR-2285g, let-7g-5p, miR-134-3p, miR-194-3p, miR-544b, miR-146a, miR-2411-3p, novel\_51, miR-125a-5p, miR-432-3p, miR-432-3p

CCDC42 ENSOARG0(coiled-coil) miR-27b-3p, miR-3120-5p, miR-135b-5p, miR-128-3p, miR-127-5p, miR-135a-5p, miR-216a-3p, miR-27a-3p, miR-616-3p, miR-505-5p, miR-27a-3p

ORC5 ENSOARG0(origin recognition complex) miR-27a-3p

miR-2285n, miR-30b-5p, miR-2285y, miR-107-5p, novel\_60, miR-3059-5p, miR-181d-5p, miR-9-3p, miR-129b-5p, miR-20a-3p, miR-10b, miR-7977, miR-7857-3p, miR-3082-5p, miR-342, novel\_103, miR-326, miR-542-5p, miR-424-5p, miR-33a-5p, miR-193a, miR-10b, miR-2300a-5p, miR-5010-3p, miR-222-5p, miR-142-3p, miR-216a-3p, miR-2285e, miR-324-3p, miR-6516-3p, miR-664a, miR-424-5p, miR-4510, miR-10b-5p, miR-338-3p, miR-6134, miR-30f, novel\_99, miR-660-5p, miR-21-3p, miR-323-5p, miR-6130, novel\_32, miR-204-3p, miR-877-5p, miR-542-5p, miR-216a-5p, miR-125b, miR-185-3p, miR-760-3p, miR-30d, miR-34b-5p, miR-2411, miR-2904, miR-548e-3p, miR-3600, miR-200b, miR-340-5p, miR-15a-5p, miR-15a, miR-6402, miR-34c, miR-16a, miR-33a-3p, miR-203b-5p, miR-199c, miR-147-5p, miR-342-3p, miR-2285x, miR-542-5p, novel\_101, miR-495-3p, miR-211, miR-3959-3p, novel\_27, miR-449a, miR-326-3p, miR-ARHGAP26 ENSOARGO(Rho GTPa 18a-3p, miR-1291, miR-107, miR-9851-3p, miR-195a-5p, miR-655-5p, miR-320b, miR-10a-5p, miR-323a-5p, miR-34b, miR-670-3p, miR-330-3p, miR-455-5p, miR-1343-5p, miR-125a-5p, miR-660, miR-466f-3p, miR-130b-5p, miR-382, miR-654-3p, miR-345-5p, miR-181a-5p, miR-1434-3p, miR-145a-5p, miR-380-3p, miR-1260b, miR-219a-1-3p, miR-455-5p, miR-744-5p, miR-133b-5p, miR-2285g, miR-103, miR-31-3p, miR-204-5p, miR-486b-3p, miR-6128, miR-3607-3p, miR-381-3p, miR-488-3p, miR-7144-5p, miR-671-5p, miR-485-5p, miR-141-3p, miR-34c-5p, miR-1260a, miR-200c, miR-339a, miR-217, miR-450a-2-3p, miR-181b-5p, miR-200c-3p, miR-107, miR-3529-3p, miR-30a-3p, miR-2478, miR-1957a, miR-2284a, miR-30a-5p, miR-300, miR-128-3p, miR-200b-3p, miR-10a-5p, miR-2411-5p, novel\_82, miR-301a-5p, miR-490-5p, miR-2447, miR-3956-3p, miR-2284j, novel\_111, miR-423-5p, miR-335-3p, miR-9-3p, miR-544-5p, miR-1083, miR-2284a, miR-211-5p, miR-203-3p, miR-1185-2-

novel\_121, miR-134-5p, miR-302a-5p, miR-330-5p, miR-29d-3p, miR-134, miR-345-3p, miR-29b-2-5p, miR-30a-3p, miR-3065-3p, novel\_39, miR-450b-5p, miR-3071-3p, miR-664-3p, miR-1260a, miR-2285af, miR-200a-3p, miR-181b-5p, miR-127-5p, miR-17-3p, miR-141-3p, miR-125a, miR-320a, miR-3154, miR-1814c, miR-671-5p, miR-345-5p, miR-10b-3p, miR-374a-3p, miR-1260b, miR-323-3p, miR-3969, miR-100-3p, miR-125b-5p, miR-6740-5p, miR-29b-3p, novel\_63, miR-134-5p, miR-374b-3p, miR-2355-3p, miR-6238, miR-134-3p, miR-3071-5p, miR-22-3p, miR-181a-5p, miR-653, miR-19b-2-5p, miR-27b-3p, miR-26a-2-3p, miR-219a-1-3p, miR-1260b, miR-29b, miR-101-5p, miR-363-5p, miR-6240, miR-345-5p, miR-432-3p, miR-432-3p, miR-2411-3p, miR-330-3p, miR-224-5p, miR-660, miR-125a-5p, miR-124-5p, miR-216b-3p, miR-181b-3p, miR-320c, miR-677, miR-29a-3p, miR-3065-5p, miR-2285ab, miR-6516-3p, miR-505-3p, miR-29c-3p, miR-495-3p, miR-17-3p, miR-2285x, miR-2284w, miR-326-3p, miR-24-3p, miR-33a-3p, miR-4324, miR-147-5p, miR-6123, miR-656-5p, miR-203b-5p, miR-29a, miR-30d-3p, miR-505-3p, miR-340-5p, miR-5703, miR-124-3p, miR-1246, novel\_133, miR-361-5p, miR-4429, miR-195a-3p, miR-143-3p, miR-181b-1-3p, miR-125b-2-3p, miR-376a-5p, miR-125b, miR-345-3p, miR-216a-5p, novel\_17, miR-221-5p, miR-1277-5p, miR-320d, miR-3065-3p, miR-660-5p, miR-504-5p, miR-221-5p, miR-545-3p, miR-22-3p, miR-204-3p, miR-216b-5p, miR-6130, miR-656-3p, miR-433-3p, miR-21a-3p, miR-543-3p, miR-345-5p, miR-2312, miR-3184-3p, miR-4510, miR-181c-5p, miR-224-5p, miR-29b-2-5p, miR-30a-3p, miR-19b-1-5p, miR-151-3p, miR-30e-3p, miR-6516-3p, miR-17-3p, miR-27a-3p, miR-181b-2-3p, miR-330-3p, miR-1343-3p, miR-151a-3p, miR-421, miR-455-3p, miR-9788-3p, miR-216a-3p, miR-125b-2-3p, miR-323b, miR-484, miR-3120-5p, miR-33a-5p, miR-124a, miR-2310, miR-323b-3p, miR-326, novel\_115, miR-320b, miR-

miR-42b-5p, miR-3958-5p, miR-3074-5p, miR-129-2-3p, miR-4510, miR-378c, miR-539-5p, miR-6134, miR-181c-5p, miR-6525, miR-769-5p, miR-320e, miR-665, miR-664a-5p, miR-29b-2-5p, miR-424-5p, miR-6516-3p, miR-17-3p, miR-450b-3p, miR-30c-1-3p, miR-221-5p, miR-378a-3p, miR-15b-5p, miR-204-3p, novel\_25, miR-139-5p, miR-6130, miR-27b-5p, miR-450a-1-3p, miR-186-5p, miR-345-5p, miR-20a, miR-2411, miR-486-3p, miR-181b-1-3p, miR-376c-3p, miR-345-3p, miR-422a, miR-500a-5p, novel\_17, miR-221-5p, miR-320d, miR-106a, miR-2284m, miR-106a, miR-548e-3p, miR-532-3p, miR-340-5p, miR-23c, miR-15a-5p, miR-222-5p, miR-23b-3p, miR-7859, miR-1197-5p, miR-5703, miR-378a-3p, miR-378i, miR-218-1-3p, miR-133a-3p, miR-142-3p, novel\_73, miR-4429, miR-19b-3p, miR-181d-5p, miR-2284j, miR-885-5p, miR-3956-3p, miR-541-3p, novel\_60, miR-3059-5p, miR-2447, miR-4454, miR-8095, miR-361-3p, miR-877-3p, miR-107-5p, miR-371a-5p, miR-769-5p, miR-218-5p, miR-374a-3p, miR-499a-5p, miR-499b-5p, miR-541-5p, miR-139-5p, miR-378e, miR-129b-5p, miR-140-5p, miR-9-3p, miR-493-5p, miR-299b-5p, miR-101b-3p, miR-106a-5p, miR-424-5p, miR-2310, miR-30c-1-3p, miR-378d, miR-106b-5p, miR-16b, miR-505, novel\_115, miR-326, miR-431-5p, miR-320b, miR-103a-2-5p, miR-1185-5p, miR-181b-2-3p, miR-2300a-5p, miR-455-3p, miR-9788-3p, miR-216a-3p, miR-147a, miR-30b-3p, miR-541, miR-143-5p, miR-378b, miR-3120-5p, miR-101c, miR-21b, miR-1388-5p, miR-378c, miR-16-5p, miR-6128, miR-1306-5p, miR-378c, miR-1260b, miR-374a-3p, miR-93, miR-323-3p, miR-3969, miR-144, miR-2332, miR-2284k, miR-410-5p, miR-134-5p, miR-374b-3p, miR-486b-3p, novel\_9, miR-1271, miR-2285aa, miR-503-3p, miR-3068-3p, miR-2284n, miR-376c-3p, miR-769, miR-17-5p, miR-3154, miR-320a, miR-93-5p, miR-1814c, miR-1248, miR-23a-5p, miR-20b-5p, miR-345-5p, miR-10b-3p, miR-29b-2-5p, miR-28b, miR-30c-2-



miR-2284d, miR-2285g, miR-503-5p, miR-134-3p, miR-31-5p, miR-497-5p, miR-30b-3p, miR-29b, miR-2284ab, miR-16b, miR-1260b, miR-873a-5p, miR-1434-3p, miR-345-5p, miR-654-3p, miR-2284l, miR-382, miR-668-3p, miR-628-5p, miR-380-5p, miR-125a-5p, miR-193a-3p, miR-124-5p, miR-483-3p, miR-378a-5p, miR-2411-3p, miR-503-5p, miR-320c, miR-29a-3p, miR-655-5p, miR-195a-5p, miR-6395, miR-1291, miR-376b-3p, miR-2284w, miR-1839-3p, miR-193b-3p, novel\_101, miR-17-3p, miR-29c-3p, miR-6123, miR-29a, miR-16a, miR-382-5p, miR-4324, miR-15a, miR-28c, miR-142b, miR-2284z, miR-322-5p, miR-505-5p, miR-483-3p, miR-2411-5p, miR-758-5p, miR-412, miR-582-3p, miR-29d-3p, miR-23b-5p, miR-345-3p, miR-380-5p, miR-28b, miR-2403, miR-543-5p, novel\_96, miR-17-3p, miR-30c-2-3p, miR-1260a, miR-376b-3p, miR-2285af, miR-125a-3p, miR-154b-5p, miR-2284n, miR-3965, miR-215-5p, miR-125a, miR-345-5p, miR-320a, miR-3154, miR-488-3p, miR-2448-3p, miR-503-3p, miR-1260b, miR-374a-3p, miR-16-5p, miR-2284v, miR-374b-3p, miR-592, miR-486b-3p, miR-125b-5p, miR-29b-3p, miR-2284k, miR-1306-3p, miR-2285e, miR-425-3p, miR-142-3p, miR-376b-3p, miR-1298-3p, miR-5010-3p, miR-1343-3p, miR-2300a-5p, miR-2284aa, miR-1388-5p, miR-2426, miR-412-3p, miR-30b-3p, miR-4532, miR-8485, miR-3187-3p, miR-30c-1-3p, miR-676-3p, miR-424-5p, miR-1839-3p, miR-214-3p, miR-1185-5p, miR-491-5p, miR-182-5p, miR-16b, miR-320b, miR-376d, miR-378g, miR-541-5p, miR-376a-3p, miR-129b-5p, miR-1306-3p, miR-423-5p, miR-7705, miR-154a, miR-2284j, miR-219a-5p, miR-3059-5p, novel\_60, miR-3956-3p, miR-374a-3p, miR-2284q, novel\_82, novel\_83, miR-328-3p, miR-15a-5p, miR-4429, miR-140-3p, miR-2300b-3p, miR-215-5p, miR-2411, miR-2432, miR-486-3p, miR-143-3p, miR-142a-3p, miR-503-5p, miR-21-3p, miR-2284m, miR-320d, miR-324-3p, miR-125b, miR-345-3p, miR-185-3p, miR-196a-3p, miR-877-

miR-1197-5p, miR-188-3p, miR-19b-3p, miR-548e-3p, miR-532-3p, miR-23b-3p, miR-15a-5p, miR-23c, miR-345-3p, miR-3653-3p, miR-345-3p, miR-2424, miR-376a-5p, miR-130a-5p, miR-543-3p, miR-3065-3p, miR-545-3p, miR-32-3p, novel\_25, miR-15b-5p, miR-377-3p, miR-2285j, miR-424-5p, miR-208b-5p, miR-129-2-3p, miR-181c-5p, novel\_44, miR-101c, miR-181b-2-3p, miR-105-1, miR-376b-3p, miR-505, miR-16b, miR-342, miR-199b-5p, miR-23a-3p, miR-33a-5p, miR-1388-3p, miR-424-5p, miR-101b-3p, miR-491-3p, miR-199b-5p, miR-376a-3p, miR-493-5p, miR-335-3p, miR-2285u, miR-664b, miR-20a-3p, miR-376d, miR-500-3p, miR-378g, miR-371a-5p, miR-101-3p, miR-374a-3p, miR-181d-5p, miR-32-3p, miR-502-3p, miR-1285-5p, miR-877-3p, miR-29d-3p, miR-501-3p, miR-345-3p, miR-3591-5p, miR-105-2, miR-7641, miR-376a-5p, miR-129-1-3p, miR-322-5p, miR-24-2-5p, miR-376b-3p, miR-664-3p, miR-200a-3p, miR-181b-5p, miR-3065-3p, miR-200a, miR-199a-5p, miR-490-3p, miR-2478, miR-331-5p, miR-7144-5p, let-7g-3p, miR-141-3p, miR-199a-5p, miR-300-3p, miR-100-3p, miR-3969, miR-135a-5p, miR-29b-3p, novel\_63, miR-331-5p, miR-16-5p, miR-3071-5p, miR-181a-5p, miR-26a-2-3p, miR-497-5p, miR-29b, miR-16b, miR-3955-5p, miR-149-5p, miR-134-3p, miR-105-5p, miR-2411-3p, miR-377-3p, miR-124-5p, miR-493-5p, let-7j, let-7a-2-3p, miR-654-3p, miR-2285r, miR-432-3p, miR-376b-3p, miR-3065-5p, miR-135b-5p, miR-195a-5p, miR-376a-2-5p, miR-450b-3p, miR-19a-3p, novel\_68, miR-677, miR-181b-3p, miR-29a-3p, miR-411b-3p, miR-16a, miR-15a, miR-6123, miR-29a, novel\_1, miR-29c-3p, miR-2285x, miR-342-3p, miR-199b-5p

miR-101b-5p, miR-388-5p, miR-388b-5p, miR-211, miR-100-5p, miR-378c, miR-539-5p, miR-590-3p, miR-129-2-3p, miR-129-5p, miR-487a-5p, novel\_74, miR-487b-5p, miR-155-5p, miR-151-3p, miR-155-5p, miR-6516, miR-376e-3p, miR-140-5p, miR-2331-3p, miR-30c-1-3p, miR-378a-3p, miR-543-3p, miR-129b-3p, miR-299, miR-21a-3p, miR-2424, miR-2432, miR-376a-5p, miR-664b-3p, miR-376c-3p, miR-130a-5p, miR-5100, miR-487a, miR-21-3p, miR-466i-5p, miR-219b-5p, miR-422a, miR-125b, miR-2285p, novel\_17, miR-487a-3p, miR-7859, miR-200b, miR-380-5p, miR-3600, miR-485-3p, miR-548e-3p, miR-133a-3p, miR-361-5p, miR-378a-3p, miR-217-5p, miR-378i, miR-2408, miR-2366, miR-1246, novel\_111, novel\_60, miR-3059-5p, miR-3956-3p, miR-374a-3p, miR-628-3p, miR-371a-5p, miR-218-5p, miR-27a-3p, miR-378e, miR-2483-3p, miR-3082-5p, miR-499b-5p, miR-7977, miR-664b, miR-452-3p, miR-20a-3p, miR-335-3p, miR-877-3p, miR-378j, miR-140-5p, miR-193a, miR-2310, miR-30c-1-3p, miR-378d, miR-33a-5p, miR-376b, miR-1388-3p, miR-101b-3p, miR-214-3p, miR-455-3p, miR-27a-3p, miR-151a-3p, miR-2300a-5p, miR-21b, miR-2284aa, miR-378c, miR-299a-5p, miR-378b, miR-484, miR-378c, miR-323-3p, miR-374a-3p, miR-374b-3p, miR-592, miR-331-5p, miR-26c, miR-144, miR-125b-5p, miR-2433, miR-376c-3p, miR-331-5p, miR-370-3p, miR-125a, miR-141-3p, miR-487a-3p, miR-376c-5p, miR-23a-5p, miR-1814c, miR-671-5p, novel\_91, miR-2318, miR-3154, miR-376c-5p, miR-331-5p, miR-2448-3p, miR-1957a, miR-3956-5p, miR-148b-5p, miR-380-5p, miR-200a-3p, miR-181b-5p, miR-200c-3p, miR-30c-2-3p, miR-30f, miR-217, miR-2285af, miR-200c, miR-664-3p, miR-2284z, miR-129-1-3p, novel\_121, miR-505-5p, miR-6516-5p, miR-378h, miR-6517, miR-429-3p, miR-200b-3p, miR-155-5p, miR-218-2-3p, novel\_27, miR-2285m, miR-2285x, miR-758-5p, miR-656-5p, miR-421-5p, miR-203b-5p, miR-485-3p, miR-502-5p, miR-

AICDA

ENSOARGO(activati

miR-543-3p, miR-1827, miR-186-5p, miR-34b-5p, miR-129b-3p, miR-500a-3p, miR-655, miR-10a, miR-216b-3p, miR-32-5p, miR-2331-3p, miR-30c-1-3p, miR-500, miR-130b-5p, miR-30a-3p, miR-665, miR-30e-3p, miR-3184-5p, miR-769-5p, miR-6525, miR-224-5p, miR-214, miR-3074-5p, miR-664-5p, novel\_73, miR-191, miR-193b-5p, miR-2284h-5p, miR-328-3p, miR-30d-3p, miR-3653-3p, miR-324-3p, miR-122-3p, miR-92a-1-5p, miR-210-5p, miR-486-3p, miR-329a-5p, miR-2285w, miR-493-5p, miR-1983, miR-136-5p, miR-203-3p, miR-1185-2-3p, miR-7689-3p, miR-139-5p, miR-2284g, miR-2319b, miR-490-5p, miR-3968, miR-499a-5p, miR-101-3p, miR-423-5p, miR-877-3p, miR-361-3p, miR-2284j, miR-2447, miR-363-3p, miR-1839-5p, miR-362-3p, miR-329-3p, miR-1185-3p, miR-421, miR-2459, miR-145b, miR-1343-3p, miR-330-3p, miR-199b-5p, miR-214-3p, miR-182-5p, miR-199a-3p, miR-431-5p, miR-124a, miR-101b-3p, miR-1248, miR-345-5p, miR-329a, miR-329b, miR-223-5p, miR-300-3p, miR-25-3p, miR-2285aa, miR-125a, miR-503-3p, miR-874-3p, miR-592, miR-191-5p, miR-125b-5p, miR-100-3p, miR-2284k, miR-1197-3p, miR-1260b, miR-193a-5p, novel\_42, miR-330-5p, miR-3591-5p, novel\_121, miR-505-5p, miR-1224-5p, miR-431, miR-6517, miR-200a-3p, miR-2284y, miR-2285b, miR-92b-3p, miR-2319a, miR-412-3p, miR-1306, miR-3591-3p, miR-6535, miR-374c-3p, miR-3074-5p, miR-329-5p, miR-6123, miR-199b-5p, miR-193b-3p, miR-335-5p, miR-197-3p, miR-19b-2-5p, miR-432, miR-7b-5p, miR-542-3p, miR-31-5p, miR-193a-3p, miR-32, novel\_51, miR-7-5p, miR-2285r, miR-432-3p, let-7f-2-3p, let-7f-2-3p, miR-6240, miR-493-5p, novel\_99, miR-2312, miR-27b-5p, miR-204-3p, novel\_32, miR-132-5p, miR-544-3p, miR-139-5p, miR-6130, miR-193b-3p, miR-3065-3p, miR-21-3p, miR-182-5p, miR-496-3p, miR-708-5p, miR-6516-3p, miR-664a, miR-19b-1-5p, miR-655-3p, miR-320e, miR-6134, miR-338-3p, miR-10b-5p, miR-145a-3p, miR-4510, miR-

miR-20a, miR-216c-5p, miR-130a-5p, miR-29b-1-5p, miR-185-3p, miR-125b, miR-21-3p, miR-760-3p, miR-106a, miR-532-3p, novel\_83, miR-148b-3p, miR-15a-5p, miR-200b, miR-5703, miR-2904, miR-4510, miR-145a-3p, miR-539-5p, miR-487a-5p, miR-424-5p, miR-708-5p, miR-208b-5p, miR-17-3p, miR-664a, miR-370-5p, novel\_25, miR-6130, miR-193b-3p, miR-139-5p, miR-376b, miR-494-3p, miR-106a-5p, miR-424-5p, miR-30c-1-3p, novel\_103, miR-326, miR-342, miR-3085-3p, miR-27a-3p, miR-105-1, miR-409b, miR-216a-3p, miR-9788-3p, miR-30b-3p, miR-125b-2-3p, miR-6529a, miR-484, miR-3120-5p, miR-2284aa, miR-181d-5p, miR-541-3p, miR-3059-5p, miR-219a-2-3p, miR-2285n, miR-2285t, miR-335, miR-4726-5p, miR-3064-5p, miR-454-5p, miR-27a-3p, miR-129b-5p, miR-361-3p, miR-877-3p, miR-4286, miR-30c-2-3p, miR-200c, miR-2285af, miR-376b-3p, miR-1260a, miR-107, miR-200c-3p, miR-181b-5p, miR-17-3p, miR-214-5p, miR-105-2, miR-128-3p, miR-200b-3p, miR-6128, miR-365a-5p, miR-93, miR-135a-5p, miR-370-5p, miR-410-5p, miR-204-5p, miR-28-5p, miR-31-3p, miR-138-5p, miR-141-3p, miR-615-5p, miR-2284n, miR-17-5p, miR-3154, miR-485-5p, novel\_48, miR-345-5p, miR-296-3p, miR-106a-5p, miR-17-5p, miR-330-3p, miR-224-5p, miR-1343-5p, miR-125a-5p, miR-26b-3p, miR-665, miR-133b-5p, miR-103, miR-20b, miR-185-5p, miR-432-5p, miR-2284d, miR-145a-5p, miR-181a-5p, miR-873a-5p, miR-1260b, miR-2284ab, miR-138, miR-30b-3p, miR-1193, novel\_101, miR-17-3p, miR-3957-3p, miR-342-3p, novel\_120, miR-2428, miR-326-3p, miR-371b-3p, miR-24-3p, miR-211, miR-382-5p, miR-16a, miR-20a-5p, miR-6402, miR-15a, miR-203b-5p, novel\_1, miR-146b-3p, miR-195a-5p, miR-135b-5p, miR-107, miR-329a-5p, miR-2424, novel\_17, miR-106a, miR-7859, miR-148a-5p, miR-16-1-3p, miR-493-3p, miR-214, miR-3074-5p, miR-181c-5p, miR-122-5p, miR-3184-5p, miR-224-5p, miR-219b-3p, miR-2285i, miR-1192, miR-2331-3p, miR-

novel\_68, miR-411b-3p, miR-323a-5p, miR-18a-3p, miR-1306, miR-150-5p, miR-135b-5p, miR-195a-5p, miR-412-3p, miR-1291, miR-193b-3p, miR-2428, miR-326-3p, miR-24-3p, novel\_87, miR-16a, miR-28c, miR-15a, miR-6123, miR-377-5p, novel\_116, miR-149-5p, miR-3431, miR-22-3p, miR-497-5p, miR-30b-3p, miR-16b, miR-363-5p, miR-2331-5p, miR-2411-3p, miR-193a-3p, miR-615-5p, miR-3956, miR-370-3p, miR-2355-5p, miR-874-3p, miR-324-5p, miR-3154, miR-485-5p, miR-1248, miR-16-5p, miR-374a-3p, miR-135a-5p, miR-100-3p, miR-2433, miR-374b-3p, miR-28-5p, miR-486b-3p, miR-412, miR-6517, miR-486-5p, miR-322-5p, miR-330-5p, miR-7134-5p, miR-345-3p, miR-4286, miR-3064-5p, miR-2285b, miR-1271-3p, miR-3065-3p, miR-28b, miR-217, novel\_127, novel\_96, miR-2898, miR-7977, miR-7689-3p, miR-10b, miR-3064-5p, miR-361-3p, miR-1983, miR-877-3p, miR-374a-3p, miR-4726-5p, miR-2300a-5p, miR-1343-3p, miR-151a-3p, miR-30b-3p, miR-412-3p, miR-2284r, miR-296-5p, miR-3120-5p, miR-1839-5p, let-7c-3p, miR-424-5p, miR-182-5p, miR-16b, miR-1306-5p, miR-326, miR-214-3p, miR-25-5p, miR-491-5p, miR-3085-3p, miR-532-5p, miR-182-5p, miR-3065-3p, miR-15b-5p, miR-22-3p, miR-193b-3p, miR-323-5p, miR-500a-3p, miR-129b-3p, miR-27b-5p, miR-1827, miR-1895, let-7g-3p, miR-665-5p, miR-214, miR-145a-3p, miR-6134, miR-346, miR-6525, miR-664a-5p, miR-151-3p, miR-132-5p, miR-424-5p, miR-500, miR-4492, miR-708-5p, miR-664a, miR-3600, miR-18a-3p, miR-532-3p, miR-1247-5p, miR-15a-5p, miR-217-5p, miR-188-3p, miR-2366, novel\_133, miR-378d, miR-345-3p, miR-105-3p, miR-486-3p, miR-377-5p, miR-345-3p, miR-185-3p, miR-324-3p, miR-500a-5p, miR-2484, miR-21-3p, miR-760-3p

miR-370-5p, miR-29b-3p, miR-3969, miR-767-5p, miR-6128, miR-3607-3p, miR-500b-5p, miR-323-3p, miR-365a-5p, miR-2448-3p, miR-503-3p, miR-488-3p, miR-320a, miR-362-5p, miR-3154, miR-7144-5p, miR-190a-3p, miR-487a-3p, miR-769, miR-200c, let-7c-5p, miR-200c-3p, miR-181b-5p, miR-2898, miR-2385-3p, miR-1, miR-30a-3p, miR-2284a, miR-1957a, miR-345-3p, miR-30a-5p, miR-29d-3p, let-7d, miR-10a-5p, miR-200b-3p, miR-128-3p, miR-7641, miR-6516-5p, miR-582-3p, let-7i, miR-147-5p, miR-656-5p, miR-22-5p, miR-203b-5p, miR-1193, miR-378b, miR-505-3p, miR-6516-3p, miR-7975, miR-10a-5p, miR-670-3p, miR-29a-3p, miR-466f-3p, miR-345-5p, miR-539-3p, miR-181a-5p, miR-653, miR-3071-5p, miR-145a-5p, miR-219a-1-3p, miR-29b, miR-30b-3p, miR-2284ab, miR-185-5p, let-7g-5p, miR-432-5p, miR-2284d, miR-544b, miR-338-5p, miR-6516-3p, miR-208b-5p, miR-145a-3p, miR-539-5p, miR-2330-3p, miR-425-5p, miR-206-3p, miR-10b-5p, miR-338-3p, let-7b-5p, miR-30f, miR-154b-3p, novel\_99, miR-221-5p, miR-182-5p, miR-21-3p, miR-370-5p, miR-544-3p, miR-6516, novel\_25, miR-204-3p, miR-185-3p, miR-216a-5p, miR-466i-5p, miR-2284m, miR-320d, miR-221-5p, miR-216c-5p, miR-2432, miR-2300b-3p, miR-5703, miR-4429, miR-485-3p, miR-505-3p, miR-3600, miR-148b-3p, miR-340-5p, miR-200b, miR-222-5p, miR-487a-3p, miR-383-5p, miR-199a-3p, miR-769-5p, miR-2285t, miR-3059-5p, miR-452-5p, miR-181d-5p, miR-362-5p, miR-154a, miR-877-3p, novel\_94, miR-7977, miR-499b-5p, let-7d-5p, novel\_115, miR-320b, miR-2957, miR-3955-3p, let-7e, let-7a-5p, miR-758-3p, miR-10b, miR-6529a, miR-125b-2-3p, miR-30b-3p, miR-544a, miR-16-2-3p, miR-2284aa, miR-142-3p, miR-9788-3p, miR-500-5p, miR-216a-3p, miR-2284k, miR-6740-5p, miR-2284v, miR-28a-3p, miR-193a-5p, miR-301, miR-30e-5p, miR-23b, miR-200a-5p, miR-345-5p, miR-2318, miR-767, miR-1248, let-7f-5p, miR-127-5p, miR-28-3p, miR-152-3p, miR-150b, miR-1306-5p, miR-206-3p, miR-132-5p, miR-151-3p, miR-2284k, miR-370-3p, miR-1271, novel\_25, miR-2284n, miR-216b-5p, miR-424-3p, miR-1827, let-7g-3p, miR-3064-5p, miR-216c-5p, miR-2432, novel\_39, miR-2285b, miR-1271-3p, miR-412-5p, miR-216a-5p, novel\_96, miR-2284m, miR-127-5p, miR-466i-5p, miR-760-3p, miR-1343-5p, miR-1197-5p, novel\_133, miR-133a-3p, miR-128-3p, miR-3059-5p, miR-1285-5p, miR-361-3p, miR-301a-5p, miR-412-5p, miR-206, miR-3064-5p, miR-669, miR-27a-3p, miR-378g, miR-216a-3p, miR-493-5p, miR-628-5p, miR-493-5p, miR-1343-5p, miR-3085-3p, miR-491-5p, miR-378a-5p, miR-27a-3p, miR-151a-3p, miR-149-5p, miR-9788-3p, miR-411-5p, miR-411b-5p, miR-2284d, miR-147a, miR-134-3p, miR-1a-3p, miR-301b-5p, miR-744-5p, miR-2284x, miR-27b-3p, miR-2284ab

TMEM69

ENSOARGO(transmembrana)

NADK

ENSOARGO(kinaza)

miR-93-5p, miR-23b, miR-17-5p, miR-30e-5p, novel\_48, miR-20b-5p, miR-671-5p, miR-329b, miR-2285aa, miR-324-5p, miR-2284n, miR-34c-5p, miR-769, miR-2284k, miR-5100, miR-204-5p, miR-374b-3p, miR-486b-3p, miR-6128, miR-133a-3p, miR-2284v, miR-93, miR-374a-3p, miR-1260b, miR-2427, miR-30a-5p, miR-3591-5p, miR-3578, miR-105-2, miR-2285ad, miR-222, miR-2284z, novel\_121, miR-9-5p, miR-24-2-5p, miR-505-5p, miR-217, miR-2285af, miR-1260a, miR-4286, miR-3529-3p, miR-2285b, miR-2478, miR-24-2-5p, miR-3591-3p, miR-9851-3p, miR-378b, miR-329-5p, miR-677, miR-323a-5p, miR-34b, miR-34c, novel\_87, miR-6402, miR-20a-5p, miR-421-5p, miR-502b, novel\_1, miR-136-3p, miR-449a, miR-211, miR-24-3p, miR-371b-3p, miR-22-3p, miR-1285, miR-2113, miR-380-3p, miR-2284ab, miR-1260b, miR-20b, miR-3431, miR-134-3p, miR-105-5p, miR-17-5p, miR-106a-5p, miR-668-3p, miR-363-5p, miR-130b-5p, miR-500a-3p, miR-433-3p, miR-30d-5p, novel\_99, miR-186-5p, let-7g-3p, miR-133b-3p, miR-21-3p, miR-296-3p, miR-182-5p, miR-552-3p, miR-548o-3p, miR-22-3p, miR-216b-5p, miR-323-5p, miR-6130, miR-15b-3p, miR-222-3p, miR-208b-5p, miR-500, miR-4492, miR-130b-5p, novel\_74, miR-214, miR-3074-2-3p, miR-145a-3p, miR-4510, miR-142a-5p, miR-769-5p, miR-124-3p, miR-5703, miR-1434-5p, miR-217-5p, miR-378d, miR-34a-5p, miR-361-5p, novel\_73, miR-106a, miR-23b-3p, miR-23c, miR-30b, novel\_17, miR-618, miR-374a-5p, miR-34b-5p, miR-30d, miR-106a, miR-2284m, miR-20a, miR-345-3p, miR-329a-5p, miR-216c-5p, miR-486-3p, miR-2432, miR-143-3p, miR-380-3p, miR-376a-5p, miR-664b-3p, miR-378j, miR-129b-5p, miR-221, miR-211-5p, miR-24-1-5p, miR-2319b, miR-203-3p, miR-378g, miR-7857-3p, miR-769-5p, miR-371a-5p, miR-2285y, miR-30b-5p, miR-2285t, miR-374a-3p, miR-2284q, miR-4726-5p, miR-9-5p, miR-452-5p, novel\_60, miR-3956-3p, novel\_111, miR-323b, miR-6529a, miR-



miR-299a-5p, miR-2426, miR-544a, miR-378c, miR-3120-5p, miR-16-2-3p, miR-1839-5p, miR-2284aa, miR-378b, miR-758-3p, miR-30b-3p, miR-1a-3p, miR-147a, miR-142-3p, miR-421, miR-1185-3p, miR-455-3p, miR-148b-5p, miR-222-5p, miR-27a-3p, miR-181b-2-3p, miR-214-3p, miR-103a-2-5p, miR-146b, miR-320b, miR-342, miR-106b-5p, miR-378d, miR-758-3p, miR-8485, miR-124a, miR-744-3p, miR-652-5p, let-7c-3p, miR-136-5p, miR-299b-5p, miR-3963, miR-361-3p, miR-381-3p, miR-378e, miR-27a-3p, miR-1185-2-3p, miR-452-3p, miR-211-5p, miR-499b-5p, miR-4726-5p, miR-218-5p, miR-30b-5p, miR-382-3p, miR-107-5p, miR-361-3p, miR-7705, miR-154a, miR-3059-5p, miR-452-5p, miR-181d-5p, miR-2285f, miR-184-3p, miR-142-3p, miR-4429, miR-361-5p, let-7a-3p, miR-148a-5p, miR-30c-5p, miR-378i, miR-1193, miR-378a-3p, miR-5703, miR-98-3p, miR-124-3p, miR-2904, miR-222-5p, miR-200b, miR-7859, miR-328-3p, novel\_83, miR-30d-3p, miR-3600, miR-466i-5p, miR-202-5p, miR-320d, miR-2484, miR-1277-5p, miR-30d, miR-30b-3p, miR-30b, miR-422a, miR-92a-1-5p, miR-216a-5p, miR-142a-3p, miR-181b-1-3p, miR-376a-5p, miR-146a-5p, miR-2432, miR-183-5p, miR-20a, miR-30f, let-7g-3p, miR-2312, miR-582-5p, miR-1827, miR-543-3p, let-7f-1-3p, miR-299, miR-433-3p, miR-487b-5p, miR-30d-5p, miR-129b-3p, miR-323-5p, miR-582-5p, miR-544-3p, miR-377-3p, miR-22-3p, miR-660-5p, miR-140-5p, miR-378a-3p, miR-370-5p, miR-3065-3p, miR-21-3p, miR-17-3p, miR-487b-5p, miR-30e-3p, miR-2285j, let-7b-3p, miR-29b-2-5p, miR-665, miR-206-3p, miR-98-3p, miR-129-2-3p, miR-378c, miR-539-5p, miR-3074-2-3p, miR-214, miR-30b-3p, miR-29b, miR-21-5p, miR-7862, miR-27b-3p, miR-2284x, miR-181a-5p, miR-3071-5p, miR-22-3p, miR-544b, miR-103, miR-20b, miR-103a-3p, miR-660, miR-106b-3p, miR-146a, miR-377-3p, miR-106a-5p, miR-17-5p, miR-132-3p, miR-2284l, miR-380-5p, let-7f-2-3p, let-7f-2-3p, miR-3578, miR-7857, miR-544a, miR-1260b, miR-219a-1-3p, miR-1388-5p, miR-2284aa, novel\_4, miR-3955-5p, miR-548e-3p, miR-431, miR-505-5p, miR-7859, miR-2284z, miR-431-5p, miR-196a-3p, miR-1260a, miR-3071-3p, miR-505, miR-29b-1-5p, miR-760-3p, miR-200a-3p, miR-221-5p, miR-329a-5p, miR-29b-1-5p, miR-432-3p, miR-2478, miR-490-3p, miR-345-5p, miR-409-5p, miR-345-5p, miR-345-5p, miR-186-5p, miR-329-5p, miR-221-5p, miR-126b-5p, miR-141-3p, miR-3120-3p, miR-216b-3p, miR-3959-5p, miR-670-3p, miR-544-3p, miR-499b-3p, miR-499a-3p, miR-502b, miR-490-5p, miR-885-5p, miR-212-3p, miR-1260b

NR3C1 ENSOARGO(nuclear

USP9X ENSOARGO(ubiquiti

miR-378d, miR-140-3p, miR-2408, miR-362-3p, novel\_83, miR-616-3p, miR-199a-3p, miR-487a-3p, miR-383-5p, miR-148b-3p, miR-15a-5p, miR-3600, miR-485-3p, miR-221-5p, miR-21-3p, miR-299-3p, miR-2284m, miR-125b, miR-196a-3p, miR-146a-5p, miR-2432, miR-29b-1-5p, miR-582-5p, miR-133b-3p, let-7g-3p, miR-18a-5p, miR-27b-5p, miR-21a-3p, let-7f-1-3p, miR-22-3p, miR-877-5p, miR-6516, miR-139-5p, miR-21-3p, miR-182-5p, miR-221-5p, miR-708-5p, miR-424-5p, miR-450b-3p, miR-17-3p, miR-29b-2-5p, miR-338-5p, miR-6134, miR-3074-2-3p, miR-145a-3p, miR-2284aa, miR-2426, miR-125b-2-3p, miR-484, miR-500-5p, miR-142-3p, miR-3085-3p, miR-362-3p, miR-33a-5p, miR-424-5p, miR-877-3p, novel\_94, miR-129b-5p, miR-7857-3p, miR-499b-5p, miR-541-5p, miR-3064-5p, miR-3958-3p, miR-8095, miR-219a-2-3p, miR-362-5p, miR-181d-5p, miR-212-3p, let-7a-2-3p, miR-582-3p, miR-7134-5p, miR-29d-3p, miR-302a-5p, miR-6516-5p, miR-17-3p, miR-181b-5p, miR-181c-3p, miR-217, miR-339a, miR-1260a, miR-1271-3p, miR-2478, miR-30a-3p, miR-29b-2-5p, miR-7144-5p, miR-10b-3p, let-7g-3p, miR-362-5p, miR-18a, miR-503-3p, miR-28-5p, miR-204-5p, miR-410-5p, miR-34c-3p, miR-29b-3p, miR-500b-5p, miR-133a-3p, miR-29b, miR-2284ab, miR-21-5p, miR-1260b, miR-3071-5p, miR-653, miR-1285, miR-1434-3p, miR-181a-5p, miR-2284d, miR-665, miR-26b-3p, miR-125a-5p, miR-190a, miR-330-3p, miR-539-3p, miR-382, miR-379-5p, miR-6395, miR-195a-5p, miR-21c, miR-378b, miR-18a-3p, miR-18b, miR-2404, miR-670-3p, miR-29a-3p, miR-656-5p, miR-147-5p, novel\_1, miR-16a, miR-382-5p, miR-502-5p, miR-15a, novel\_27, miR-211, miR-3959-3p, novel\_101, miR-17-3p, miR-2285x, novel\_120, miR-16-1-3p, miR-361-5p, miR-33b-3p, miR-217-5p, miR-1434-5p, miR-328-3p, miR-7859, miR-380-5p, miR-30d-3p, miR-18a-3p, miR-324-3p, miR-500a-5p, miR-219b-5p, miR-2285p, miR-26a-5p, novel\_17, miR-2424, miR-376a-5p, miR-142a-3p, miR-329a-

miR-6529a, miR-1a-3p, miR-2426, miR-450b-5p, miR-544a, miR-3120-5p, miR-16-2-3p, miR-2284aa, miR-21b, miR-330-3p, miR-27a-3p, miR-181b-2-3p, miR-142-5p, miR-153, miR-2459, miR-1185-3p, miR-500-5p, novel\_103, miR-3955-3p, miR-153-3p, miR-146b, miR-124a, miR-33a-5p, miR-193a, miR-3187-3p, miR-361-3p, miR-129b-5p, novel\_94, miR-335-3p, miR-20a-3p, miR-499a-3p, miR-1185-2-3p, miR-27a-3p, miR-203-3p, miR-335, miR-3968, miR-212-3p, miR-32-3p, miR-3059-5p, miR-219a-5p, miR-194b-5p, miR-2284j, miR-362-5p, miR-877-3p, miR-2300b-3p, miR-5703, miR-124-3p, miR-19b-3p, miR-378d, miR-222-5p, miR-383-5p, miR-210-5p, miR-345-3p, miR-185-3p, miR-216a-5p, miR-500a-5p, miR-2284m, miR-329a-5p, miR-10a-3p, miR-146a-5p, miR-21a-3p, miR-129b-3p, miR-18a-5p, novel\_99, miR-32-3p, miR-545-3p, miR-216b-5p, miR-499b-3p, miR-544-3p, miR-377-3p, miR-155-5p, miR-665, miR-19b-1-5p, miR-155-5p, miR-664a, miR-208b-5p, miR-708-5p, miR-129-5p, miR-4492, miR-539-5p, miR-2330-3p, miR-206-3p, miR-142a-5p, miR-338-3p, miR-1285, miR-1434-3p, miR-708-3p, miR-19b-2-5p, miR-194-5p, miR-3071-5p, miR-2284ab, miR-27b-3p, miR-188-5p, miR-133b-5p, miR-31-5p, miR-2284d, miR-544b, miR-146a, miR-377-3p, miR-194a, miR-2411-3p, miR-330-3p, miR-483-3p, miR-106b-3p, miR-6240, let-7f-2-3p, let-7f-2-3p, miR-382, miR-668-3p, miR-18b, miR-2387, miR-378b, miR-19a-3p, miR-6516-3p, miR-9851-3p, miR-146b-5p, miR-329-5p, miR-181b-3p, miR-677, miR-142b, miR-6402, miR-502-5p, novel\_87, miR-382-5p, miR-485-3p, miR-206, miR-625-3p, miR-203b-5p, miR-1a-1-5p, miR-335-5p, miR-323c, miR-2428, miR-2284w, novel\_27, miR-134, miR-345-3p, miR-300, miR-155-5p, miR-18b-5p, miR-483-3p, miR-302a-5p, novel\_121, miR-2284z, miR-134-5p, miR-30f, miR-1a-2-5p, miR-543-5p, miR-200a-3p, miR-181a-2-3p, miR-1, miR-2285b, miR-490-3p, miR-331-5p, miR-381-3p, miR-362-5p, miR-18a, miR-10a-3p, miR-7144-3p, miR-361-3p, miR-488-3p, miR-1291, miR-485-5p, miR-221-5p, miR-542-5p, miR-2355-5p, miR-323a-5p, miR-34c-5p, novel\_69, miR-323-5p, miR-34b, miR-4443, miR-34c, miR-665, miR-2284q, miR-3059-5p, miR-145a-3p, miR-214, miR-2330-3p, miR-877-3p, miR-449a, miR-196a-5p, miR-296-5p, miR-5703, miR-374b-3p, miR-34a-5p, miR-3120-5p, miR-665, miR-222-5p, miR-2284h-5p, miR-194-3p, novel\_17, miR-196b-5p, miR-2898, miR-221-5p, miR-34b-5p, miR-214-3p

IPP

ENSOARGO intracis

SRRM4

ENSOARGO serine/a

|       |                    |                                                                                                                                                                                                                                                                                                                                                                                                                                                                                                                                                                                                                                                                                                                                                                                                                                                                                                                                                                                                                                                                                                                                                                                                                                                                                                                                                                                                                                                                                                                                                                                                                                                                                                                                                                                                                                                                                                                                                                                                                                                                                                                                                                                           |
|-------|--------------------|-------------------------------------------------------------------------------------------------------------------------------------------------------------------------------------------------------------------------------------------------------------------------------------------------------------------------------------------------------------------------------------------------------------------------------------------------------------------------------------------------------------------------------------------------------------------------------------------------------------------------------------------------------------------------------------------------------------------------------------------------------------------------------------------------------------------------------------------------------------------------------------------------------------------------------------------------------------------------------------------------------------------------------------------------------------------------------------------------------------------------------------------------------------------------------------------------------------------------------------------------------------------------------------------------------------------------------------------------------------------------------------------------------------------------------------------------------------------------------------------------------------------------------------------------------------------------------------------------------------------------------------------------------------------------------------------------------------------------------------------------------------------------------------------------------------------------------------------------------------------------------------------------------------------------------------------------------------------------------------------------------------------------------------------------------------------------------------------------------------------------------------------------------------------------------------------|
|       |                    | miR-181c-5p, miR-122-5p, miR-378c, miR-3074-5p, miR-378c, miR-592, miR-222-3p, miR-144, miR-132-5p, miR-378a-3p, miR-30f, let-7g-3p, miR-424-3p, miR-2448-3p, miR-30e-5p, miR-30d-5p, miR-130a-5p, miR-380-5p, miR-450c-5p, miR-466i-5p, miR-200c-3p, miR-181b-5p, miR-2484, miR-30d, miR-664-3p, miR-200c, miR-2285af, miR-30b, miR-422a, miR-378h, miR-200b, miR-24-2-5p, miR-429-3p, miR-2285ad, miR-222, miR-142-3p, miR-30c, miR-200b-3p, novel_133, miR-30c-5p, miR-378i, miR-30a-5p, miR-378a-3p, miR-1343-5p, miR-323c, miR-9-3p, miR-181d-5p, miR-450a-5p, miR-3958-3p, miR-147-5p, miR-656-5p, miR-30b-5p, miR-670-3p, miR-489, miR-378e, miR-144-3p, miR-3074-5p, miR-20a-3p, miR-664b, miR-412-3p, miR-9-3p, miR-1983, miR-378f, miR-2319a, miR-221, miR-378j, miR-378d, miR-380-5p, miR-33a-5p, let-7c-3p, miR-1343-5p, miR-221-3p, miR-31-5p, miR-378c, miR-1388-5p, miR-181a-5p, miR-143-5p, miR-1434-3p, miR-378b, miR-708-3p, miR-484, miR-7857                                                                                                                                                                                                                                                                                                                                                                                                                                                                                                                                                                                                                                                                                                                                                                                                                                                                                                                                                                                                                                                                                                                                                                                                                          |
| SHPRH | ENSOARGO(SNF2 his  |                                                                                                                                                                                                                                                                                                                                                                                                                                                                                                                                                                                                                                                                                                                                                                                                                                                                                                                                                                                                                                                                                                                                                                                                                                                                                                                                                                                                                                                                                                                                                                                                                                                                                                                                                                                                                                                                                                                                                                                                                                                                                                                                                                                           |
| APOOL | ENSOARGO(apolipop  | miR-493-5p, miR-411, miR-377-3p, miR-154b-5p, miR-493-5p, miR-1197-5p, miR-196a-5p, miR-10a-5p, miR-155-5p, miR-33b-3p, miR-212-5p, miR-582-3p, miR-210-3p, miR-30f, miR-125a-3p, miR-221-5p, miR-466i-5p, miR-181b-5p, miR-127-5p, miR-345-3p, miR-490-3p, miR-1271-3p, miR-376b-5p, miR-29a-5p, miR-376c-5p, miR-200a-5p, miR-1895, miR-376c-5p, miR-2312, miR-10b-3p, miR-552-3p, miR-3956, miR-221-5p, miR-504-5p, miR-155-5p, miR-10a, miR-151-3p, miR-5100, miR-155-5p, novel_74, miR-3184-3p, miR-181c-5p, miR-365a-5p, miR-145-3p, miR-10b-5p, miR-145a-5p, miR-10b, miR-181a-5p, miR-708-3p, miR-484, miR-188-5p, miR-145b, miR-222-5p, miR-151a-3p, miR-199b-3p, miR-539-5p, miR-365b-5p, miR-103a-2-5p, miR-196b-5p, miR-1b-5p, miR-2284l, miR-378j, miR-150-5p, miR-376b-5p, miR-2285ab, miR-877-3p, miR-504, miR-10a-5p, miR-203-3p, miR-107-5p, miR-2440, miR-199c, miR-490-5p, miR-181d-5p, novel_101, miR-2285f, miR-3059-5p, miR-877-3p, miR-133a-3p, novel_133, miR-615-3p, miR-501-3p, miR-9-5p, miR-23b-3p, miR-532-3p, miR-2285ad, miR-18a-3p, miR-3600, miR-760-3p, novel_127, miR-3653-3p, miR-125a-3p, miR-1260a, miR-185-3p, miR-500a-5p, miR-28b, miR-664b-3p, miR-490-3p, miR-1271-3p, miR-192-3p, miR-199a-5p, novel_39, miR-3064-5p, miR-23a-5p, miR-3154, miR-23b, miR-216b-5p, miR-300-3p, miR-132-5p, miR-199a-5p, miR-664a, miR-138-5p, miR-4492, miR-2332, miR-3604, miR-1260b, miR-433-5p, miR-214, miR-1260b, miR-30b-3p, miR-138, miR-21-5p, miR-455-5p, miR-2889, miR-1285, miR-541, miR-296-5p, miR-432, miR-2284r, miR-30b-3p, miR-3071-5p, miR-758-3p, miR-501-3p, miR-134-3p, miR-432-5p, miR-149-5p, miR-216a-3p, miR-1343-3p, miR-3955-5p, miR-3085-3p, miR-103a-2-5p, miR-214-3p, miR-199b-5p, novel_103, novel_51, miR-455-5p, miR-432-3p, miR-432-3p, miR-758-3p, miR-1b-5p, miR-3187-3p, miR-1388-3p, miR-23a-3p, miR-412-3p, miR-1291, miR-1983, miR-335-3p, miR-199b-5p, miR-2387, miR-381-3p, miR-21c, miR-18a-3p, miR-411b-3p, miR-378g, miR-4443, miR-500-3p, miR-378b, miR-3064-5p, miR-615, miR-28c, miR-107-5p, miR-382-5p, miR-2285y, miR-877-3p, miR-2428, miR-199b-5p, novel_27, miR-502-3p, miR-541-3p, miR-3059-5p, miR-9-5p |
| GDF3  | ENSOARGO(growth d  |                                                                                                                                                                                                                                                                                                                                                                                                                                                                                                                                                                                                                                                                                                                                                                                                                                                                                                                                                                                                                                                                                                                                                                                                                                                                                                                                                                                                                                                                                                                                                                                                                                                                                                                                                                                                                                                                                                                                                                                                                                                                                                                                                                                           |
| GRK5  | ENSOARGO(G protei: |                                                                                                                                                                                                                                                                                                                                                                                                                                                                                                                                                                                                                                                                                                                                                                                                                                                                                                                                                                                                                                                                                                                                                                                                                                                                                                                                                                                                                                                                                                                                                                                                                                                                                                                                                                                                                                                                                                                                                                                                                                                                                                                                                                                           |

miR-182-5p, miR-2411-3p, miR-105-5p, miR-330-3p, miR-296-3p, miR-193a-3p, miR-214-3p, miR-660, miR-130b-3p, miR-491-5p, miR-376b, miR-6240, miR-296-3p, miR-6239, miR-29b, miR-181b-2-3p, miR-130a-3p, miR-330-3p, miR-105-1, miR-133b-5p, miR-1843a-3p, miR-29a, miR-29c-3p, miR-193b-3p, miR-301b-3p, miR-378b, miR-148a-3p, miR-6516-3p, miR-7977, miR-320b, miR-20a-3p, miR-181b-3p, miR-6535, miR-677, miR-29a-3p, miR-3596, miR-185-3p, miR-345-3p, miR-217, miR-543-5p, miR-152-3p, novel\_96, miR-21-3p, miR-28-3p, miR-143-3p, miR-29a-5p, miR-3065-3p, miR-181b-1-3p, miR-140-3p, miR-217-5p, miR-29d-3p, miR-134, miR-193b-5p, miR-345-3p, miR-105-2, miR-582-3p, miR-1224-5p, miR-134-5p, miR-148b-3p, miR-7859, miR-6740-5p, miR-100-3p, miR-29b-3p, miR-34c-3p, miR-134-5p, miR-4492, miR-487a-5p, miR-454-3p, miR-214, miR-28a-3p, miR-1197-3p, miR-301, novel\_99, miR-1827, miR-876-3p, miR-182-5p, miR-296-3p, miR-2285aa, miR-3065-3p, miR-660-5p, miR-3068-3p, novel\_32, miR-193b-3p, miR-301a-3p, miR-504, miR-493-5p, miR-544-5p, miR-221, miR-129b-5p, miR-7857-3p, miR-203-3p, miR-1185-2-3p, miR-27a-3p, miR-139-5p, miR-3064-5p, miR-452-3p, miR-7689-3p, miR-126b-5p, miR-450a-5p, miR-335, miR-7134-3p, miR-218-5p, miR-101-3p, miR-301a-5p, miR-362-5p, novel\_111, miR-154a, miR-2285f, miR-181d-5p, miR-450b-5p, miR-21b, miR-101c, miR-3120-5p, miR-2284r, miR-301b-5p, miR-125b-2-3p, miR-147a, miR-500-5p, miR-216a-3p, miR-221-3p, miR-148b-5p, miR-1185-3p, miR-330-3p, novel\_78, miR-2300a-5p, miR-27a-3p, miR-181b-2-3p, miR-491-5p, miR-3085-3p, miR-542-5p, miR-320b, miR-199a-3p, miR-29b-1-5p, miR-16b, miR-182-5p, miR-193a, miR-1b-5p, miR-1388-3p, miR-494-3p, miR-424-5p, miR-23a-3p, miR-2312, miR-345-5p, miR-625-5p, novel\_99, miR-1827, miR-433-3p, miR-6516, miR-2284s, miR-139-5p, miR-6130, miR-15b-5p, miR-504-5p, miR-21-3p, miR-532-5p, miR-182-5p, miR-664a, miR-424-5p, miR-708-5p, miR-208b-5p, miR-2285j, miR-6525, miR-346, miR-181c-5p, miR-129-2-3p, miR-4510, miR-2330-3p, miR-184-3p, novel\_73, miR-148a-5p, miR-34a-5p, miR-2300b-3p, miR-7859, miR-23b-3p, miR-95-3p, miR-15a-5p, miR-200b, miR-23c, miR-199a-3p, miR-380-5p, miR-320d, miR-466i-5p, miR-3653-3p, miR-34b-5p, miR-299-3p, miR-542-5p, miR-2285p, miR-618, miR-500a-5p, miR-345-3p, miR-29b-1-5p, miR-130a-5p, miR-486-3p, miR-143-3p, miR-345-3p, miR-107, miR-195a-5p, miR-2285ab, miR-3591-3p, miR-216a-3p, miR-299b-3p, miR-411b-3p, miR-670-3p, miR-34b, miR-669, miR-320c, miR-677, miR-181b-3p, miR-320b, miR-3120-3p, novel\_1, miR-502-5p, miR-15a, miR-28c, miR-34c, miR-485-3p, miR-16a, miR-382-5p, miR-323c, miR-449a, miR-335-5p, miR-3957-3p, miR-2285x, miR-542-5p, miR-758-5p, miR-16b, miR-219a-1-3p, miR-497-5p, miR-27b-3p, miR-7862, miR-432, miR-181a-5p, miR-1843b-5p, miR-197-3p, miR-432-5p, miR-185-5p, miR-3431, novel\_116, miR-103, miR-103a-3p, miR-

LAPTM5 ENSOARGOC lysosoma

DZIP1 ENSOARGOC DAZ inte:

miR-18a-3p, miR-1224-5p, miR-322-5p, miR-378h, miR-758-5p, miR-15a-5p, miR-2284z, miR-450a-1-3p, miR-214-5p, miR-378i, miR-1197-5p, miR-378a-3p, miR-378d, miR-34a-5p, miR-24-2-5p, miR-380-5p, miR-1957a, miR-199a-5p, miR-2285af, miR-2397-5p, miR-125a-3p, miR-219b-5p, miR-422a, miR-34b-5p, novel\_127, miR-543-5p, miR-21-3p, miR-378a-3p, miR-3068-3p, miR-21-3p, miR-2355-5p, miR-182-5p, miR-34c-5p, miR-6130, miR-199a-5p, miR-15b-5p, miR-154b-5p, miR-877-5p, miR-2448-3p, miR-450a-1-3p, miR-129b-3p, miR-671-5p, miR-378c, novel\_42, miR-4510, miR-3184-3p, miR-16-5p, miR-1271, miR-1197-3p, miR-122-5p, miR-378c, miR-338-3p, miR-2433, miR-664a-5p, miR-3969, miR-665, miR-320e, miR-450b-3p, miR-424-5p, miR-487a-5p, miR-130b-5p, miR-2300a-5p, miR-455-3p, miR-2459, miR-378b, miR-1843b-5p, miR-450c-3p, miR-16b, miR-378c, miR-2284aa, miR-497-5p, miR-380-5p, miR-130b-5p, miR-424-5p, miR-376b, miR-378d, miR-4532, miR-5126, novel\_19, miR-16b, miR-182-5p, novel\_51, novel\_124, miR-487b-5p, miR-199b-5p, miR-103a-2-5p, miR-24-1-5p, miR-216b-3p, miR-452-3p, miR-7689-3p, miR-378e, miR-3596, miR-670-3p, miR-34b, miR-2483-3p, miR-140-5p, miR-2387, miR-199b-5p, miR-18a-3p, miR-96-5p, miR-378f, miR-195a-5p, novel\_60, miR-3956-3p, miR-452-5p, novel\_101, miR-361-3p, miR-24-3p, miR-449a, miR-199b-5p, miR-15a, miR-6529b, miR-34c, miR-16a, miR-107-5p, miR-4726-5p, miR-628-3p, novel\_1, miR-203b-5p, miR-22-5p, miR-147-5p

miR-371a-5p, novel\_82, miR-3964, miR-3958-3p, let-7i-3p, miR-181d-5p, miR-363-3p, miR-8095, miR-877-3p, novel\_111, miR-378j, miR-140-5p, miR-361-3p, miR-221, miR-335-3p, miR-1983, miR-541-5p, miR-7689-3p, miR-139-5p, miR-452-3p, miR-144-5p, miR-203-3p, miR-27a-3p, miR-454-5p, miR-499a-3p, miR-25, miR-2483-3p, miR-505, miR-106b-5p, miR-431-5p, novel\_103, miR-153-3p, miR-214-3p, miR-130b-3p, miR-744-3p, miR-101b-3p, miR-382-3p, miR-106a-5p, miR-8485, miR-1b-5p, miR-491-3p, miR-1a-3p, miR-4791, miR-143-5p, miR-1298-5p, miR-2284aa, miR-3120-5p, miR-101a-5p, miR-181b-2-3p, miR-27a-3p, miR-221-3p, miR-153, miR-664a-5p, miR-222-3p, miR-2285j, miR-208b-5p, miR-708-5p, miR-454-3p, miR-214, miR-3184-3p, miR-346, miR-206-3p, miR-411, miR-21a-3p, miR-625-5p, miR-133b-3p, miR-3065-3p, miR-532-5p, miR-140-5p, miR-32-5p, miR-499b-3p, miR-301a-3p, miR-377-3p, miR-582-5p, miR-139-5p, miR-500a-5p, novel\_17, miR-1277-5p, miR-21-3p, miR-106a, miR-20a, miR-2411, miR-130a-5p, miR-181b-1-3p, miR-133a-3p, miR-218-1-3p, miR-361-5p, miR-19b-3p, miR-505-3p, miR-548e-3p, miR-106a, novel\_83, miR-7859, miR-148b-3p, miR-133a-5p, miR-28c, miR-20a-5p, miR-92a-3p, miR-6119-3p, miR-379-3p, miR-206, miR-29a, novel\_1, novel\_101, miR-2285x, miR-29c-3p, miR-1a-1-5p, miR-301b-3p, miR-2284w, miR-2285m, miR-323c, miR-148a-3p, miR-505-3p, miR-412-3p, miR-19a-3p, miR-3120-3p, miR-216b-3p, miR-677, miR-144-3p, miR-181b-3p, miR-29a-3p, miR-32, miR-106a-5p, miR-17-5p, miR-377-3p, miR-452-5p, miR-668-3p, miR-197-3p, miR-653, miR-181a-5p, miR-542-3p, miR-1434-3p, miR-27b-3p, miR-29b, miR-16-1-3p, miR-130a-3p, miR-20b, miR-3535, miR-144, miR-26c, miR-409-3p, miR-1-5p, miR-29b-3p, miR-2332, miR-28-5p, miR-134-5p, miR-6128, miR-133a-3p, miR-144-5p, miR-323-3p, miR-93, miR-93-5p, miR-17-5p, miR-148b-5p, novel\_39, miR-503-5p, miR-3064-5p, miR-450a-2-3p, miR-191-3p, miR-543-5p, novel\_96, novel\_127, miR-200a-3p, miR-210-5p, miR-8117, miR-324-3p, miR-339a, miR-345-3p, miR-185-3p, miR-92a-1-5p, miR-483-3p, miR-129-1-3p, miR-18a-3p, miR-1224-5p, novel\_79, miR-212-5p, miR-431, miR-941, miR-615-3p, miR-345-3p, miR-2300b-3p, miR-2904, miR-5703, miR-769-5p, miR-4510, miR-129-2-3p, miR-425-5p, miR-874-5p, miR-3432a, miR-4492, miR-135a-1-3p, miR-331-3p, miR-323-5p, miR-769, miR-6130, miR-2331-3p, miR-874-3p, miR-2355-5p, miR-370-3p, miR-296-3p, miR-141-3p, miR-1271, miR-339b, miR-23a-5p, miR-625-5p, miR-1248, miR-129b-3p, miR-296-3p, miR-1388-3p, miR-1839-3p, miR-3085-3p, miR-491-5p, miR-483-3p, miR-25-5p, miR-3955-3p, miR-503-5p, miR-431-5p, miR-296-3p, miR-3141, novel\_51, miR-2411-3p, miR-503-5p, miR-9788-3p, miR-2355-3p, miR-31-5p, miR-1343-3p, miR-339-5p, miR-30b-3p, miR-3120-5p, miR-30b-3p, miR-361-3p, novel\_111, miR-3059-5p, miR-1839-3p, miR-576-3p, miR-615, miR-769-5p, miR-425-5p, miR-323a-5p, miR-6535, miR-3064-5p, miR-499b-5p, miR-1291, miR-361-3p, miR-3141, miR-18a-3p

miR-452-5p, miR-128b-5p, miR-154a, miR-2285n, novel\_82, miR-2440, miR-154-3p, miR-335, miR-452-3p, miR-20a-3p, miR-203-3p, miR-652-3p, miR-27a-3p, miR-7857-3p, miR-2483-3p, miR-129b-5p, miR-140-5p, miR-335-3p, miR-1388-3p, miR-494-3p, miR-29b-1-5p, miR-320b, novel\_103, miR-146b, miR-222-5p, miR-27a-3p, miR-199b-3p, miR-105-1, miR-330-3p, miR-148b-5p, miR-1298-3p, miR-1a-3p, miR-7857, miR-544a, miR-3074-2-3p, miR-3074-5p, miR-206-3p, novel\_44, miR-29b-2-5p, miR-208b-5p, miR-669a-3p, miR-450b-3p, miR-6516-3p, miR-17-3p, miR-216b-3p, miR-552-3p, miR-2331-3p, miR-544-3p, miR-377-3p, miR-582-5p, miR-21a-3p, miR-450a-1-3p, miR-543-3p, miR-582-5p, miR-154b-3p, miR-146a-5p, miR-2432, miR-380-3p, miR-29b-1-5p, miR-125b-2-3p, miR-216a-5p, miR-125b, miR-2285p, miR-34b-5p, miR-21-3p, miR-320d, miR-1b-3p, miR-212-5p, novel\_83, miR-328-3p, miR-200b, miR-188-3p, miR-218-1-3p, miR-148a-5p, miR-34a-5p, novel\_73, miR-4429, miR-184-3p, miR-17-3p, novel\_101, miR-335-5p, miR-449a, miR-374c-5p, miR-323c, miR-34c, miR-4324, miR-576-3p, miR-22-5p, miR-147-5p, miR-199c, miR-6119-3p, novel\_1, miR-206, miR-216b-3p, miR-3074-5p, miR-320c, miR-2404, miR-34b, miR-670-3p, miR-150-5p, miR-3065-5p, miR-216a-3p, miR-146b-5p, miR-6516-3p, miR-6395, miR-1291, miR-382, miR-6240, miR-330-3p, miR-105-5p, miR-455-5p, miR-146a, miR-377-3p, miR-125a-5p, miR-26b-3p, miR-3955-5p, novel\_116, miR-544b, miR-432-5p, miR-185-5p, miR-450c-3p, miR-431-3p, miR-374b-3p, miR-432, miR-542-3p, miR-1285, miR-2113, miR-27b-3p, miR-7862, miR-455-5p, miR-380-3p, miR-2284ab, miR-1260b, miR-3607-3p, miR-2284v, miR-1260b, miR-125b-5p, miR-6740-5p, miR-34c-3p, miR-494-5p, miR-592, miR-125a, miR-34c-5p, miR-331-5p, miR-374c-3p, miR-320a, miR-488-3p, miR-2448-3p, miR-1, miR-29b-2-5p, miR-3529-3p, miR-1271-3p, miR-2285af, miR-205-5p, miR-1260a, miR-200c, miR-125a-3p, miR-17-3p, miR-2404, miR-25, miR-2284s, miR-2284r, miR-129b-5p

CRNKL1 ENSOARGO(C crooked : 5p, novel\_73, miR-4429, miR-184-3p, miR-17-3p, novel\_101, miR-335-5p, miR-449a, miR-374c-5p, miR-323c, miR-34c, miR-4324, miR-576-3p, miR-22-5p, miR-147-5p, miR-199c, miR-6119-3p, novel\_1, miR-206, miR-216b-3p, miR-3074-5p, miR-320c, miR-2404, miR-34b, miR-670-3p, miR-150-5p, miR-3065-5p, miR-216a-3p, miR-146b-5p, miR-6516-3p, miR-6395, miR-1291, miR-382, miR-6240, miR-330-3p, miR-105-5p, miR-455-5p, miR-146a, miR-377-3p, miR-125a-5p, miR-26b-3p, miR-3955-5p, novel\_116, miR-544b, miR-432-5p, miR-185-5p, miR-450c-3p, miR-431-3p, miR-374b-3p, miR-432, miR-542-3p, miR-1285, miR-2113, miR-27b-3p, miR-7862, miR-455-5p, miR-380-3p, miR-2284ab, miR-1260b, miR-3607-3p, miR-2284v, miR-1260b, miR-125b-5p, miR-6740-5p, miR-34c-3p, miR-494-5p, miR-592, miR-125a, miR-34c-5p, miR-331-5p, miR-374c-3p, miR-320a, miR-488-3p, miR-2448-3p, miR-1, miR-29b-2-5p, miR-3529-3p, miR-1271-3p, miR-2285af, miR-205-5p, miR-1260a, miR-200c, miR-125a-3p, miR-17-3p, miR-2404, miR-25, miR-2284s, miR-2284r, miR-129b-5p

YIPF5 ENSOARGO(C Yip1 dom. miR-2404, miR-25, miR-2284s, miR-2284r, miR-129b-5p

RAB32 ENSOARGO(C RAB32, m 196a-3p, miR-664-3p, miR-505-5p, miR-185-5p, miR-145b, miR-664b, miR-6517, miR-668-5p, miR-145a-5p, miR-484, miR-21a-3p, miR-31-5p, miR-1224-5p, miR-125a, miR-323a-5p, miR-323-5p, miR-330-5p, miR-96-5p, miR-138, miR-7144-5p, miR-493-5p, miR-493-5p, miR-181a-2-3p, miR-2285r, miR-326-3p, novel\_63, miR-326, miR-210-5p, miR-125b-5p, miR-125b, miR-655-3p, miR-138-5p, miR-127-5p, miR-125a-5p

KDELR2 ENSOARGO(C KDEL (Ly 5p, miR-493-5p, miR-181a-2-3p, miR-2285r, miR-326-3p, novel\_63, miR-326, miR-210-5p, miR-125b-5p, miR-125b, miR-655-3p, miR-138-5p, miR-127-5p, miR-125a-5p



miR-29b-1-5p, miR-214-3p, miR-103a-2-5p, miR-1388-3p, miR-1839-3p, miR-382-3p, miR-23a-3p, miR-33a-5p, miR-193a, miR-8485, miR-758-3p, miR-1b-5p, miR-301b-5p, miR-758-3p, miR-101c, novel\_4, miR-1343-3p, miR-151a-3p, miR-5010-3p, miR-27a-3p, miR-9788-3p, miR-148b-5p, miR-455-3p, miR-126a-5p, miR-218-5p, miR-101-3p, miR-769-5p, miR-301a-5p, miR-107-5p, miR-3958-3p, miR-2285t, novel\_60, miR-3956-3p, miR-212-3p, miR-9-5p, miR-219a-5p, miR-129b-5p, miR-668-5p, miR-136-5p, novel\_94, miR-4792, miR-24-1-5p, miR-20a-3p, miR-7689-3p, miR-126b-5p, miR-25, miR-203-3p, miR-454-5p, miR-27a-3p, novel\_17, miR-219b-5p, miR-185-3p, miR-21-3p, miR-299-3p, miR-2285w, miR-376a-5p, miR-29b-1-5p, miR-130a-5p, miR-125b-2-3p, miR-380-3p, miR-191, miR-217-5p, miR-188-3p, miR-142-3p, miR-218-1-3p, miR-148a-5p, miR-212-5p, miR-23b-3p, miR-23c, miR-2284h-5p, miR-532-3p, miR-151-3p, miR-320e, miR-29b-2-5p, miR-665, miR-3604, miR-17-3p, miR-4492, miR-590-3p, miR-145a-3p, miR-3074-2-3p, miR-214, miR-769-5p, miR-224-5p, miR-21a-3p, miR-433-3p, miR-186-5p, novel\_99, miR-2331-3p, miR-216b-3p, miR-377-3p, miR-656-3p, miR-224-5p, miR-377-3p, miR-365b-5p, miR-466f-3p, miR-654-3p, miR-2285r, miR-3071-5p, miR-380-3p, miR-27b-3p, miR-122-3p, miR-103a-3p, miR-185-5p, miR-3431, miR-103, miR-502-5p, miR-485-3p, miR-6119-3p, novel\_1, miR-421-5p, miR-147-5p, miR-1a-1-5p, miR-1839-3p, miR-495-3p, miR-17-3p, miR-2285x, miR-371b-3p, miR-216a-3p, miR-107, miR-7-1-3p, miR-2404, miR-299b-3p, miR-217, miR-450a-2-3p, miR-17-3p, miR-1a-2-5p, miR-107, miR-2385-3p, miR-29b-2-5p, miR-24-2-5p, miR-1271-3p, miR-128-3p, miR-299a-3p, miR-9-5p, novel\_121, miR-1-5p, novel\_63, miR-6740-5p, miR-100-3p, miR-409-3p, miR-191-5p, miR-592, miR-1306-5p, miR-193a-5p, miR-365a-5p, miR-301, miR-23b, miR-10b-3p, miR-23a-5p, miR-3074-1-3p, miR-

miR-598-3p, miR-30d-5p, miR-186-5p, miR-30c-1-3p, miR-2331-3p, miR-548o-3p, miR-301a-3p, miR-499b-3p, miR-15b-5p, let-7i-5p, let-7f, miR-151-3p, miR-3604, miR-664a-5p, miR-454-3p, let-7b, miR-214, miR-142a-5p, miR-181c-5p, miR-30c-5p, miR-196l, miR-1434-5p, miR-361-5p, miR-2284u, miR-106a, miR-7859, miR-2284h-5p, miR-30b, miR-210-5p, novel\_17, miR-500a-5p, miR-219b-5p, miR-345-3p, miR-202-5p, miR-98-5p, let-7k, miR-2285w, miR-345-3p, miR-664b-3p, miR-486-3p, miR-335-3p, miR-2284g, miR-499a-3p, miR-3596, miR-203-3p, miR-4443, novel\_82, miR-101-3p, miR-301a-5p, miR-9-5p, novel\_111, miR-2284r, miR-329-3p, miR-301b-5p, miR-362-3p, miR-101c, miR-1839-5p, miR-199b-3p, miR-145b, miR-425-3p, miR-147a, miR-142-5p, miR-455-3p, miR-421, miR-16b, miR-106b-5p, miR-1185-5p, miR-130b-3p, miR-214-3p, miR-127-3p, miR-2284b, miR-8485, miR-1b-5p, miR-30e-5p, miR-93-5p, miR-329a, miR-20b-5p, miR-1248, miR-3068-3p, miR-2285aa, miR-300-3p, miR-2284k, novel\_9, miR-592, miR-28a-3p, miR-16-5p, miR-1260b, miR-1197-3p, miR-196a-5p, miR-330-5p, miR-155-5p, miR-30c, miR-322-5p, miR-9-5p, novel\_121, miR-28-3p, let-7f-5p, miR-200a-3p, miR-3064-5p, let-7g, miR-2284y, novel\_39, miR-2285b, miR-3141, miR-150-5p, miR-1306, miR-3591-3p, miR-2319a, let-7e-5p, miR-3120-3p, miR-576-3p, miR-142b, novel\_87, miR-421-5p, miR-193b-3p, miR-301b-3p, miR-708-3p, miR-542-3p, miR-223-3p, miR-16b, miR-497-5p, miR-27b-3p, miR-340-3p, miR-103a-3p, miR-487b-3p, miR-194-3p, miR-105-5p, miR-3141, miR-2411-3p, miR-196b-5p, miR-193a-3p, miR-432-3p, miR-432-3p, miR-21a-3p, miR-30f, miR-3065-3p, miR-21-3p, miR-193b-3p, miR-155-5p, miR-324-3p, miR-132-5p, miR-155-5p, miR-208b-5p, miR-424-5p, let-7b-5p, novel\_133, miR-362-3p, miR-376a-5p, miR-5703, miR-19b-3p, miR-378d, miR-3600, miR-222-5p, miR-15a-5p, miR-522-3p, miR-196a-3p, miR-106a, miR-452-3p, miR-140-3p, miR-1197-5p, novel\_101, miR-185-3p, miR-21-3p, miR-128-1-5p, miR-582-3p, miR-184-3p, miR-330-5p, miR-22-3p, miR-1290, miR-302a-5p, miR-2300a-5p, miR-18a-3p, miR-2285ad, miR-214-3p, novel\_127, miR-3955-3p, miR-3085-3p, miR-185-3p, miR-219b-5p, novel\_17, miR-326, miR-345-5p, miR-2432, miR-376a-5p, miR-3064-5p, miR-216c-5p, miR-1388-3p, miR-135b-5p, miR-345-5p, miR-345-5p, miR-3591-3p, miR-18a-3p, miR-2285ab, miR-22-3p, miR-223-5p, miR-499a-3p, miR-499b-3p, miR-21-3p, miR-874-3p, miR-3064-5p, miR-490-5p, miR-335, miR-135a-5p, miR-2332, miR-326-3p, miR-877-3p, miR-214, miR-3074-2-3p, miR-2285f, miR-335-5p, miR-145a-3p, miR-3184-3p

RNMT ENSOARGO(RNA (gua:329a, miR-20b-5p, miR-1248, miR-3068-3p, miR-2285aa, miR-300-3p, miR-2284k, novel\_9, miR-592, miR-28a-3p, miR-16-5p, miR-1260b, miR-1197-3p, miR-196a-5p, miR-330-5p, miR-155-5p, miR-30c, miR-322-5p, miR-9-5p, novel\_121, miR-28-3p, let-7f-5p, miR-200a-3p, miR-3064-5p, let-7g, miR-2284y, novel\_39, miR-2285b, miR-3141, miR-150-5p, miR-1306, miR-3591-3p, miR-2319a, let-7e-5p, miR-3120-3p, miR-576-3p, miR-142b, novel\_87, miR-421-5p, miR-193b-3p, miR-301b-3p, miR-708-3p, miR-542-3p, miR-223-3p, miR-16b, miR-497-5p, miR-27b-3p, miR-340-3p, miR-103a-3p, miR-487b-3p, miR-194-3p, miR-105-5p, miR-3141, miR-2411-3p, miR-196b-5p, miR-193a-3p, miR-432-3p, miR-432-3p, miR-21a-3p, miR-30f, miR-3065-3p, miR-21-3p, miR-193b-3p, miR-155-5p, miR-324-3p, miR-132-5p, miR-155-5p, miR-208b-5p, miR-424-5p, let-7b-5p, novel\_133, miR-362-3p, miR-376a-5p, miR-5703, miR-19b-3p, miR-378d, miR-3600, miR-222-5p, miR-15a-5p, miR-522-3p, miR-196a-3p, miR-106a, miR-452-3p, miR-140-3p, miR-1197-5p, novel\_101, miR-185-3p, miR-21-3p, miR-128-1-5p

MPRIP ENSOARGO(myosin p. miR-582-3p, miR-184-3p, miR-330-5p, miR-22-3p, miR-1290, miR-302a-5p, miR-2300a-5p, miR-18a-3p, miR-2285ad, miR-214-3p, novel\_127, miR-3955-3p, miR-3085-3p, miR-185-3p, miR-219b-5p, novel\_17, miR-326, miR-345-5p, miR-2432, miR-376a-5p, miR-3064-5p, miR-216c-5p, miR-1388-3p, miR-135b-5p, miR-345-5p, miR-345-5p, miR-3591-3p, miR-18a-3p, miR-2285ab, miR-22-3p, miR-223-5p, miR-499a-3p, miR-499b-3p, miR-21-3p, miR-874-3p, miR-3064-5p, miR-490-5p, miR-335, miR-135a-5p, miR-2332, miR-326-3p, miR-877-3p, miR-214, miR-3074-2-3p, miR-2285f, miR-335-5p, miR-145a-3p, miR-3184-3p

PRELID2 ENSOARGO(PRELI do) miR-582-3p, miR-184-3p, miR-330-5p, miR-22-3p, miR-1290, miR-302a-5p, miR-2300a-5p, miR-18a-3p, miR-2285ad, miR-214-3p, novel\_127, miR-3955-3p, miR-3085-3p, miR-185-3p, miR-219b-5p, novel\_17, miR-326, miR-345-5p, miR-2432, miR-376a-5p, miR-3064-5p, miR-216c-5p, miR-1388-3p, miR-135b-5p, miR-345-5p, miR-345-5p, miR-3591-3p, miR-18a-3p, miR-2285ab, miR-22-3p, miR-223-5p, miR-499a-3p, miR-499b-3p, miR-21-3p, miR-874-3p, miR-3064-5p, miR-490-5p, miR-335, miR-135a-5p, miR-2332, miR-326-3p, miR-877-3p, miR-214, miR-3074-2-3p, miR-2285f, miR-335-5p, miR-145a-3p, miR-3184-3p

miR-195a-5p, miR-493-5p, miR-3065-5p, miR-3591-3p, miR-489, miR-211-5p, miR-7-1-3p, miR-2285t, miR-490-5p, miR-371a-5p, miR-16a, miR-133a-5p, miR-15a, novel\_27, miR-211, miR-9-5p, miR-193b-3p, miR-497-5p, miR-1260b, miR-16b, miR-3071-5p, miR-653, miR-503-5p, miR-153, miR-105-1, miR-193a-3p, miR-153-3p, miR-16b, miR-105-5p, miR-503-5p, let-7a-2-3p, miR-539-3p, let-7c-3p, miR-668-3p, miR-493-5p, miR-424-5p, novel\_48, let-7g-3p, let-7g-3p, miR-3154, miR-500a-3p, miR-15b-5p, miR-154b-5p, miR-193b-3p, miR-532-5p, miR-1271, miR-141-3p, miR-21-3p, miR-204-5p, miR-500, miR-424-5p, miR-487b-5p, miR-338-5p, miR-2285j, miR-1260b, miR-16-5p, miR-3607-3p, miR-378d, let-7a-2-3p, miR-218-1-3p, miR-188-3p, miR-2427, miR-532-3p, miR-15a-5p, miR-487a-3p, miR-9-5p, miR-322-5p, miR-485-3p, miR-3600, miR-7641, miR-6517, miR-200a-3p, miR-1260a, miR-29a-5p, miR-376a-5p, miR-3529-3p, miR-503-5p, miR-330-5p, miR-23b-5p, miR-218-2-3p, miR-10a-5p, miR-128-3p, miR-18b-5p, novel\_79, miR-6517, miR-129-1-3p, miR-545-5p, miR-2284z, miR-483-3p, miR-2411-5p, miR-24-2-5p, miR-302a-5p, miR-217, miR-339a, miR-30c-2-3p, miR-1260a, novel\_96, miR-152-3p, miR-127-5p, miR-2898, miR-3064-5p, miR-490-3p, miR-1957a, miR-199a-5p, miR-29a-5p, miR-380-5p, miR-18a, miR-3154, miR-2448-3p, miR-671-5p, miR-1248, miR-485-5p, miR-3074-1-3p, miR-125a, miR-615-5p, miR-2285aa, miR-370-3p, miR-2355-5p, miR-3068-3p, miR-199a-5p, miR-125b-5p, miR-6740-5p, miR-592, miR-1197-3p, miR-1260b, miR-194-5p, novel\_23, miR-22-3p, miR-223-3p, miR-432, miR-188-5p, miR-1260b, miR-30b-3p, miR-377-5p, miR-26b-3p, miR-130a-3p, miR-339-5p, miR-149-5p, miR-194-3p, miR-134-3p, miR-432-5p, miR-194a, novel\_51, miR-330-3p, miR-125a-5p, miR-483-3p, miR-378a-5p, miR-2483-5p, miR-382, miR-6240, miR-380-5p, miR-432-3p, miR-654-3p, miR-216a-3p, miR-3970, miR-1306, miR-148a-3p, miR-18b, miR-19a-3p, miR-10a-5p, miR-26b-5p, miR-378b, novel\_68, novel\_69, miR-33a-3p, novel\_87, miR-4324, miR-502b, miR-6123, miR-203b-5p, miR-128-1-5p, miR-758-5p, miR-335-5p, miR-219b-3p, miR-199b-5p, miR-301b-3p, miR-2428, miR-326-3p, miR-3959-3p, miR-1197-5p, miR-140-3p, miR-217-5p, miR-2300b-3p, novel\_133, miR-378d, miR-664-5p, miR-184-3p, miR-19b-3p, miR-493-3p, miR-3600, miR-380-5p, miR-548e-3p, novel\_83, miR-2284h-5p, miR-148b-3p, miR-7859, miR-125b, miR-219b-5p, miR-26a-5p, miR-210-5p, miR-21-3p, miR-221-5p, miR-202-5p, miR-345-3p, miR-2285w, miR-2411, miR-376c-3p, miR-377-5p, miR-29b-1-5p, miR-411, novel\_99, miR-339b, miR-18a-5p, miR-216b-3p, miR-2331-3p, miR-30c-1-3p, miR-221-5p, miR-504-5p, miR-22-3p, miR-204-3p, miR-6130, miR-301a-3p, miR-10a, miR-320e, miR-2285j, miR-669a-3p, miR-454-3p, miR-449a, miR-2440, miR-34c, miR-206, miR-17-3p, miR-17-3p, miR-34b-5p, miR-625-3p, miR-3120-3p, miR-34b, miR-34c-5p, miR-2284r, miR-21a-3p, miR-34a-5p

miR-320b, miR-326, miR-29b-1-5p, miR-182-5p, miR-153-3p, miR-2330-5p, let-7c-3p, miR-744-3p, miR-376b, miR-758-3p, miR-2310, miR-2284r, miR-301b-5p, miR-758-3p, miR-101a-5p, miR-544a, miR-2284aa, miR-199b-3p, novel\_78, miR-151a-3p, miR-409b, miR-548w, miR-27a-3p, miR-153, miR-539-5p, miR-142-3p, miR-455-3p, miR-1185-3p, miR-2440, miR-301a-5p, miR-2447, miR-3059-5p, miR-877-3p, miR-129b-5p, miR-136-5p, miR-493-5p, miR-452-3p, miR-499b-5p, miR-211-5p, miR-2483-3p, miR-489, miR-203-3p, miR-144-5p, miR-1185-2-3p, miR-27a-3p, miR-219b-5p, miR-125b, miR-202-5p, miR-320d, miR-466i-5p, miR-3653-3p, miR-216c-5p, miR-2887, miR-29b-1-5p, miR-377-5p, miR-142a-3p, miR-2432, miR-376a-5p, miR-1434-5p, miR-4429, miR-19b-3p, miR-380-5p, miR-148b-3p, miR-340-5p, miR-151-3p, miR-29b-2-5p, novel\_74, miR-17-3p, miR-487a-5p, miR-130b-5p, miR-669a-3p, miR-539-5p, miR-129-2-3p, miR-6134, miR-338-3p, let-7g-3p, miR-345-5p, novel\_99, miR-186-5p, miR-660-5p, miR-182-5p, miR-6516, miR-544-3p, miR-204-3p, miR-125a-5p, miR-660, miR-130b-5p, miR-493-5p, miR-345-5p, let-7a-2-3p, miR-653, miR-26a-2-3p, miR-27b-3p, miR-31-5p, miR-377-5p, miR-6238, miR-544b, miR-502-5p, miR-33a-3p, novel\_1, miR-199c, miR-17-3p, miR-758-5p, miR-211, novel\_27, miR-326-3p, miR-2284w, miR-148a-3p, miR-3970, miR-3065-5p, miR-378b, miR-19a-3p, miR-320b, miR-3120-3p, miR-7-1-3p, miR-320c, miR-17-3p, miR-28-3p, miR-152-3p, miR-3529-3p, miR-29b-2-5p, miR-181a-2-3p, miR-218-2-3p, miR-330-5p, let-7a-2-3p, miR-1224-5p, miR-6516-5p, miR-758-5p, miR-2284z, miR-129-1-3p, novel\_121, novel\_63, miR-125b-5p, miR-409-3p, miR-204-5p, miR-28a-3p, miR-103b, miR-144-5p, miR-1197-3p, miR-301, miR-320a, let-7g-3p, miR-2318, miR-345-5p, miR-23a-5p, miR-1814c, miR-1248, miR-125a, miR-331-5p, miR-3959-5p, miR-3596, miR-185-5p, miR-1298-3p, novel\_83, miR-582-3p, miR-149-5p, miR-134-5p, miR-2285aa, miR-2355-5p, miR-138, miR-1291, miR-455-5p, miR-361-3p, miR-6529a, miR-134, miR-2903, miR-423-5p, miR-3184-5p, miR-486-3p, miR-138-5p, miR-378a-5p, miR-664a, miR-4492, miR-134-5p, miR-486b-3p, miR-331-3p, miR-1973, miR-185-3p, miR-455-5p, miR-2355-3p, miR-432-3p, miR-142-5p, miR-432-3p, miR-142a-5p, miR-141-3p, miR-877-3p, miR-200a-3p, miR-135b-5p, miR-3958-3p, miR-338-5p, miR-135a-5p, miR-140-3p, miR-21a-3p

MYOF

ENSOARGO(myoferli:

OGDHL

ENSOARGO(oxogluta:

SCHIP1

ENSOARGO(schwanno:

miR-3074-2-3p, miR-214, miR-3184-5p, miR-652b, miR-142a-5p, miR-224-5p, miR-338-5p, miR-2285j, miR-708-5p, miR-487a-5p, miR-874-5p, miR-4492, miR-130b-5p, miR-17-3p, miR-21-3p, miR-370-5p, miR-552-3p, miR-296-3p, miR-30c-1-3p, miR-2331-3p, miR-504-5p, miR-6516, miR-544-3p, miR-323-5p, miR-139-5p, miR-433-3p, miR-1827, novel\_99, miR-133b-3p, miR-18a-5p, miR-486-3p, miR-143-3p, miR-376a-5p, miR-29b-1-5p, miR-130a-5p, miR-142a-3p, miR-324-3p, miR-92a-1-5p, miR-345-3p, miR-30b-3p, miR-21-3p, miR-466i-5p, miR-3600, miR-532-3p, miR-199a-3p, miR-23b-3p, miR-222-5p, miR-340-5p, miR-23c, miR-200b, miR-2904, miR-140-3p, miR-188-3p, novel\_133, miR-2300b-3p, miR-133a-3p, miR-142-3p, miR-452-5p, novel\_60, miR-3956-3p, miR-423-5p, miR-7705, miR-361-3p, miR-371a-5p, novel\_82, miR-218-5p, miR-2440, miR-2284q, miR-499a-5p, miR-335, miR-450a-5p, miR-499b-5p, miR-7977, miR-139-5p, miR-3064-5p, miR-10b, miR-2319b, miR-20a-3p, miR-1185-2-3p, miR-2483-3p, miR-140-5p, miR-361-3p, miR-199b-5p, miR-335-3p, novel\_94, miR-1983, miR-147-3p, miR-668-5p, miR-504, miR-23a-3p, miR-376b, miR-33a-5p, miR-1388-3p, miR-193a, miR-2310, miR-1b-5p, miR-30c-1-3p, miR-29b-1-5p, miR-199a-3p, miR-326, miR-153-3p, miR-199b-5p, miR-214-3p, miR-3085-3p, miR-487b-5p, miR-145b, novel\_78, miR-2300a-5p, miR-9788-3p, miR-455-3p, miR-1185-3p, miR-153, miR-496-5p, miR-142-5p, miR-142-3p, miR-484, miR-2284aa, miR-3120-5p, miR-1388-5p, miR-544a, miR-3607-3p, miR-193a-5p, miR-133a-3p, miR-103b, miR-28a-3p, miR-323-3p, miR-1260b, miR-1197-3p, miR-409-3p, miR-2332, miR-370-5p, miR-3432a, miR-134-5p, miR-486b-3p, miR-28-5p, miR-2355-5p, miR-542-5p, miR-370-3p, miR-2285aa, miR-1271, miR-615-5p, miR-574-5p, miR-199a-5p, miR-3965, miR-3959-5p, miR-365a-3p, miR-3154, miR-18a, miR-92b, miR-188-3p, miR-301, miR-503-3p, miR-7144-5p, miR-671-

miR-541, miR-329-3p, miR-30b-3p, miR-362-3p, miR-1388-5p, miR-101c, miR-409b, miR-330-3p, miR-181b-2-3p, miR-376b-3p, miR-455-3p, miR-320b, miR-16b, miR-362-3p, miR-3955-3p, miR-424-5p, miR-33a-5p, miR-30c-1-3p, miR-136-5p, miR-9-3p, miR-335-3p, miR-376a-3p, miR-2483-3p, miR-3082-5p, miR-7857-3p, miR-3596, miR-376d, miR-3968, miR-154-3p, miR-2284q, miR-541-3p, miR-3059-5p, miR-9-5p, novel\_111, miR-154a, miR-2366, miR-193b-5p, miR-362-3p, miR-5703, miR-2904, miR-19b-3p, miR-142-3p, miR-4429, miR-184-3p, miR-485-3p, miR-15a-5p, miR-487a-3p, miR-345-3p, miR-216a-5p, miR-202-5p, miR-320d, miR-221-5p, miR-503-5p, miR-487a, miR-345-3p, miR-142a-3p, miR-181b-1-3p, miR-130a-5p, miR-376c-3p, miR-486-3p, miR-450a-1-3p, miR-345-5p, miR-154b-3p, novel\_99, miR-221-5p, miR-30c-1-3p, miR-532-5p, miR-370-5p, miR-154a-3p, miR-2284s, miR-376e-3p, miR-377-3p, miR-15b-5p, miR-877-5p, miR-15b-3p, miR-6516-3p, miR-17-3p, miR-450b-3p, miR-424-5p, miR-3074-2-3p, miR-3958-5p, miR-374b-3p, miR-450c-3p, miR-197-3p, miR-219a-1-3p, miR-1260b, miR-16b, miR-30b-3p, miR-497-5p, miR-503-5p, miR-3431, miR-377-3p, miR-503-5p, miR-2411-3p, miR-330-3p, miR-483-3p, miR-1343-5p, miR-6240, miR-380-5p, miR-432-3p, miR-432-3p, miR-345-5p, miR-539-3p, miR-378b, miR-376b-3p, miR-216a-3p, miR-3970, miR-19a-3p, miR-410-5p, miR-195a-5p, miR-6516-3p, miR-378b, miR-655-5p, miR-374c-3p, miR-181b-3p, miR-320c, miR-677, miR-15a, novel\_87, miR-16a, novel\_1, miR-1193, novel\_101, miR-17-3p, miR-2428, miR-345-3p, miR-1343-5p, miR-128-3p, miR-483-3p, miR-758-5p, miR-9-5p, miR-322-5p, novel\_121, miR-450a-1-3p, miR-376b-3p, miR-2285af, miR-1260a, miR-30f, miR-30c-2-3p, miR-17-3p, miR-543-5p, miR-380-5p, novel\_39, miR-2448-3p, miR-3154, miR-320a, miR-329a, miR-345-5p, miR-1248, miR-487a-3p, miR-2355-5p, miR-331-5p, miR-374c-3p, miR-376c-3p, miR-5100, miR-370-5p, miR-551b-3p, miR-23a-5p, miR-7144-5p, miR-1248, miR-329b, miR-329a, miR-361-3p, miR-677, miR-181b-3p, miR-378g, miR-499a-3p, miR-27a-5p, miR-499b-3p, miR-211-5p, miR-3074-5p, miR-203b-5p, miR-204-5p, miR-130b-5p, miR-4726-5p, miR-30a-3p, miR-665, miR-30e-3p, miR-211, miR-371b-3p, miR-3074-2-3p, miR-3059-5p, miR-129-2-3p, miR-3074-5p, miR-885-5p, miR-362-3p, miR-2904, miR-23b-5p, miR-188-3p, novel\_133, miR-329-3p, miR-362-3p, miR-1285, miR-1247-5p, miR-2284h-5p, miR-421, miR-129-1-3p, miR-3431, miR-134-3p, miR-1224-5p, miR-181b-2-3p, miR-324-3p, miR-362-3p, miR-181b-1-3p, miR-30a-3p, miR-130b-5p, miR-2285w

ID01

ENSOARG0C indoleam

RAD54L

ENSOARG0C RAD54-1i

miR-625-5p, let-7f-1-3p, miR-129b-3p, miR-500a-3p, miR-6130, miR-15b-5p, miR-877-5p, miR-30c-1-3p, miR-548o-3p, miR-216b-3p, miR-154a-3p, miR-487a-5p, miR-500, miR-424-5p, miR-30e-3p, miR-30a-3p, miR-29b-2-5p, miR-338-5p, miR-3184-5p, miR-539-5p, miR-4510, miR-2284u, miR-361-5p, let-7a-3p, miR-1246, miR-140-3p, miR-5703, miR-487a-3p, miR-7859, miR-15a-5p, miR-199a-3p, miR-548e-3p, miR-30d-3p, miR-212-5p, miR-485-3p, miR-3653-3p, miR-21-3p, miR-185-3p, miR-345-3p, miR-376a-5p, miR-487a, miR-195a-3p, miR-499a-3p, miR-203-3p, miR-500-3p, miR-1185-2-3p, miR-2284g, miR-154-3p, miR-107-5p, miR-877-3p, miR-362-5p, miR-502-3p, miR-423-5p, miR-3059-5p, miR-6527, miR-2284j, miR-2426, miR-21b, miR-3120-5p, miR-6529a, miR-501-3p, miR-1298-3p, miR-500-5p, miR-9788-3p, miR-1185-3p, miR-548w, miR-2300a-5p, miR-103a-2-5p, miR-199a-3p, miR-431-5p, miR-16b, miR-30c-1-3p, miR-8485, miR-1839-3p, miR-424-5p, miR-376b, miR-2284b, miR-10b-3p, miR-2318, novel\_48, miR-7144-5p, miR-190a-3p, miR-362-5p, miR-487a-3p, miR-370-3p, miR-592, miR-2284k, miR-29b-3p, miR-135a-5p, miR-500b-5p, miR-2284v, miR-16-5p, miR-345-3p, miR-218-2-3p, miR-29d-3p, miR-501-3p, miR-322-5p, novel\_121, miR-214-5p, miR-431, miR-6119-5p, miR-30f, miR-30c-2-3p, miR-2478, miR-450b-5p, miR-2284y, miR-2284a, miR-29b-2-5p, miR-30a-3p, miR-4286, miR-195a-5p, miR-135b-5p, miR-150-5p, miR-376b-3p, miR-378b, miR-29a-3p, miR-6535, novel\_1, miR-29a, miR-147-5p, miR-4324, miR-15a, miR-6402, miR-16a, miR-1839-3p, miR-29c-3p, miR-16b, miR-29b, miR-497-5p, miR-223-3p, miR-2284d, miR-2355-3p, miR-122-3p, miR-665, miR-466f-3p, miR-2411-3p, miR-2285r, miR-539-3p, miR-668-3p, let-7f-2-3p, let-7f-2-3p, miR-411b-3p, miR-769, miR-204-3p, miR-140-5p, miR-504-5p, miR-2355-5p, miR-125a, miR-296-3p, miR-876-3p, miR-504, novel\_48, novel\_94, miR-361-3p, miR-450a-1-3p, miR-23b, miR-769-5p, miR-24-3p, miR-6134, miR-2447, miR-3607-3p, novel\_74, miR-450b-3p, novel\_1, miR-6123, miR-2285j, miR-5100, miR-2440, miR-125b-5p, miR-769-5p, miR-153, miR-23b-3p, miR-383-5p, miR-23c, miR-450a-1-3p, miR-545-5p, miR-30b-3p, miR-16-1-3p, miR-16-1-3p, miR-3591-5p, miR-1843b-5p, miR-7b-5p, miR-2904, miR-450c-3p, miR-30b-3p, miR-5703, miR-143-3p, miR-3529-3p, miR-23a-3p, miR-125a-5p, miR-153-3p, miR-7-5p, miR-618, miR-216a-5p, miR-92a-1-5p, miR-125b

GRXCR2 ENSOARGO (glutared

TRAV8-7 ENSOARGO (T cell r

miR-582-5p, miR-500a-3p, miR-21a-3p, miR-2285c, miR-15b-5p, miR-377-3p, miR-582-5p, miR-370-5p, miR-660-5p, miR-874-5p, miR-500, miR-129-5p, miR-424-5p, miR-30a-3p, miR-320e, miR-3604, miR-2285j, miR-6525, miR-206-3p, miR-3074-2-3p, miR-539-5p, miR-4429, novel\_73, miR-19b-3p, miR-217-5p, miR-1197-5p, miR-1246, miR-362-3p, miR-193b-5p, miR-1247-5p, miR-15a-5p, miR-505-3p, miR-212-5p, miR-3960, miR-3653-3p, miR-320d, miR-324-3p, miR-92a-1-5p, miR-130a-5p, miR-377-5p, miR-369-3p, miR-877-3p, miR-1983, miR-129b-5p, miR-140-5p, miR-361-3p, miR-203-3p, miR-489, miR-2483-3p, miR-2285u, miR-211-5p, miR-4792, miR-20a-3p, miR-2319b, miR-3964, miR-335, miR-2440, miR-1285-5p, miR-877-3p, miR-3059-5p, miR-212-3p, miR-362-3p, miR-101a-5p, miR-1a-3p, miR-329-3p, miR-455-3p, miR-2285e, miR-147a, novel\_78, miR-25-5p, miR-2957, miR-505, miR-362-3p, miR-16b, miR-320b, miR-8485, miR-424-5p, miR-329a, miR-3154, miR-320a, miR-488-3p, miR-424-3p, miR-301, miR-133c, miR-154b-5p, miR-3965, miR-141-3p, miR-204-5p, miR-138-5p, miR-26c, miR-135a-5p, miR-29b-3p, miR-410-5p, novel\_63, miR-34c-3p, miR-370-5p, miR-6128, miR-3607-3p, miR-16-5p, miR-29d-3p, miR-214-5p, novel\_121, miR-322-5p, miR-200a-3p, miR-450a-2-3p, miR-30f, miR-217, miR-192-3p, miR-1, miR-2319a, miR-195a-5p, miR-505-3p, miR-135b-5p, miR-450b-3p, miR-19a-3p, miR-412-3p, miR-21c, miR-3065-5p, miR-6535, miR-320c, miR-29a-3p, miR-655-5p, miR-378b, miR-656-5p, miR-147-5p, miR-206, novel\_1, miR-29a, miR-16a, miR-33a-3p, miR-15a, novel\_27, miR-374c-5p, miR-2285m, miR-211, miR-1193, miR-29c-3p, miR-335-5p, miR-497-5p, miR-7862, miR-188-5p, miR-138, miR-21-5p, miR-29b, miR-16b, miR-223-3p, miR-1434-3p, miR-2285g, miR-377-5p, miR-660, miR-452-5p, miR-377-3p, miR-654-3p, miR-2285r, miR-2483-5p, miR-101-5p



|         |                    |                                                                                                                                                                                                                                                                                                                                                                                                                                                                                                                                                                                                                                                                                                                                                                                                                                                                                                                                                                                                                                                                                                                                                                                                                                                                                                                                                                                                                                                                                                                                                                                                              |
|---------|--------------------|--------------------------------------------------------------------------------------------------------------------------------------------------------------------------------------------------------------------------------------------------------------------------------------------------------------------------------------------------------------------------------------------------------------------------------------------------------------------------------------------------------------------------------------------------------------------------------------------------------------------------------------------------------------------------------------------------------------------------------------------------------------------------------------------------------------------------------------------------------------------------------------------------------------------------------------------------------------------------------------------------------------------------------------------------------------------------------------------------------------------------------------------------------------------------------------------------------------------------------------------------------------------------------------------------------------------------------------------------------------------------------------------------------------------------------------------------------------------------------------------------------------------------------------------------------------------------------------------------------------|
|         |                    | miR-664a, miR-155-5p, miR-450b-3p, miR-424-5p, miR-4492, miR-874-5p, miR-665, miR-6134, miR-3184-5p, miR-214, miR-30f, miR-133b-3p, miR-582-5p, miR-450a-1-3p, miR-21a-3p, miR-30d-5p, miR-582-5p, miR-155-5p, miR-15b-5p, miR-22-3p, miR-504-5p, miR-106a, miR-21-3p, miR-30d, miR-208b-3p, miR-185-3p, miR-29b-1-5p, miR-143-3p, miR-486-3p, miR-345-3p, miR-20a, miR-1193, miR-200b, miR-15a-5p, miR-328-3p, miR-106a, miR-4726-5p, miR-2285t, miR-218-5p, miR-423-5p, miR-452-5p, miR-219a-5p, miR-504, miR-147-3p, miR-381-3p, miR-7857-3p, miR-1185-2-3p, miR-4443, miR-203-3p, miR-499b-5p, miR-25-5p, miR-214-3p, miR-106b-5p, miR-16b, miR-29b-1-5p, miR-106a-5p, miR-2330-5p, miR-424-5p, miR-450b-5p, miR-2426, miR-3120-5p, miR-21b, miR-30b-3p, miR-1185-3p, miR-5010-3p, miR-138-5p, miR-486b-3p, miR-134-5p, miR-409-3p, miR-100-3p, miR-133a-3p, miR-16-5p, miR-20b-5p, miR-30e-5p, miR-17-5p, miR-3154, miR-200a-5p, miR-93-5p, miR-874-3p, miR-3068-3p, miR-574-5p, miR-141-3p, miR-1271, miR-615-5p, miR-370-3p, miR-200c-3p, miR-2898, miR-200a-3p, miR-543-5p, miR-200c, miR-200b-3p, miR-155-5p, miR-134, miR-30a-5p, miR-322-5p, miR-134-5p, miR-450a-1-3p, miR-582-3p, miR-2284z, miR-429-3p, miR-1224-5p, miR-20a-5p, miR-133a-5p, miR-208a-3p, miR-15a, miR-16a, miR-371b-3p, miR-2428, miR-1291, miR-6395, miR-195a-5p, miR-6535, miR-320b, miR-452-5p, miR-106a-5p, miR-17-5p, miR-432-3p, let-7f-2-3p, let-7f-2-3p, miR-363-5p, miR-138, miR-30b-3p, miR-16b, miR-497-5p, miR-1843b-5p, miR-1285, miR-432, miR-22-3p, miR-450c-3p, miR-197-3p, miR-432-5p, miR-20b, miR-2355-3p |
| KMT2E   | ENSOARGO( lysine ( |                                                                                                                                                                                                                                                                                                                                                                                                                                                                                                                                                                                                                                                                                                                                                                                                                                                                                                                                                                                                                                                                                                                                                                                                                                                                                                                                                                                                                                                                                                                                                                                                              |
| GRID2IP | ENSOARGO( glutamat | miR-2903, miR-874-5p, miR-744-5p, miR-340-3p, miR-4286<br>miR-3074-5p, miR-2428, miR-326-3p, miR-449a, miR-331-3p, miR-34c, miR-128-1-5p, miR-6123, miR-28-5p, miR-486b-3p, miR-4492, miR-708-5p, miR-3074-5p, miR-34b, miR-378g, miR-34c-5p, miR-377-3p, miR-4443, miR-22-3p, miR-433-3p, miR-                                                                                                                                                                                                                                                                                                                                                                                                                                                                                                                                                                                                                                                                                                                                                                                                                                                                                                                                                                                                                                                                                                                                                                                                                                                                                                              |
| TFEB    | ENSOARGO( transcri | 2411, novel_39, miR-486-3p, miR-8485, miR-377-3p, miR-326, miR-324-3p, miR-34b-5p, miR-134-3p, miR-2411-5p, miR-412-5p, miR-330-5p, miR-125b-2-3p, miR-30b-3p, miR-22-3p, miR-30b-3p, miR-34a-5p                                                                                                                                                                                                                                                                                                                                                                                                                                                                                                                                                                                                                                                                                                                                                                                                                                                                                                                                                                                                                                                                                                                                                                                                                                                                                                                                                                                                             |

miR-3141, miR-150-5p, miR-1306, miR-3970, miR-216a-3p, miR-410-5p, miR-2284e, miR-378f, novel\_68, novel\_69, miR-411b-3p, miR-6535, miR-677, miR-181b-3p, miR-4324, miR-335-5p, miR-1839-3p, miR-193b-3p, miR-199b-5p, miR-7b-5p, miR-197-3p, miR-16b, miR-16-1-3p, miR-497-5p, miR-27b-3p, miR-31-5p, miR-340-3p, miR-339-5p, miR-134-3p, miR-194-3p, miR-7-5p, miR-377-3p, miR-3141, novel\_51, miR-193a-3p, miR-668-3p, miR-2285r, miR-424-3p, miR-345-5p, miR-874-3p, miR-3068-3p, miR-2285aa, miR-2355-5p, miR-125a, miR-2433, miR-100-3p, miR-125b-5p, miR-592, miR-193a-5p, miR-16-5p, miR-1197-3p, miR-1260b, miR-1290, miR-330-5p, miR-429-3p, novel\_79, miR-1224-5p, miR-18b-5p, miR-431, miR-9-5p, miR-505-5p, miR-322-5p, miR-486-5p, miR-129-1-3p, miR-127-5p, novel\_96, novel\_127, miR-3064-5p, novel\_39, miR-29a-5p, miR-504, miR-139-5p, miR-378g, miR-2483-3p, miR-500-3p, miR-4443, novel\_82, miR-301a-5p, miR-490-5p, miR-2447, miR-9-5p, miR-423-5p, miR-541, miR-301b-5p, miR-501-3p, miR-758-3p, miR-1388-5p, miR-21b, novel\_78, miR-181b-2-3p, miR-2459, miR-431-5p, miR-29b-1-5p, novel\_19, miR-16b, miR-491-5p, miR-199b-5p, miR-214-3p, miR-1388-3p, miR-378d, miR-2285c, miR-598-3p, miR-345-5p, miR-339b, miR-504-5p, miR-2331-3p, miR-30c-1-3p, miR-216b-3p, miR-2284s, miR-377-3p, miR-582-5p, miR-15b-5p, miR-151b, miR-665, miR-4492, miR-130b-5p, miR-129-2-3p, miR-3958-5p, miR-665-5p, miR-214, miR-769-5p, miR-346, miR-224-5p, miR-3184-5p, miR-378i, miR-193b-5p, miR-378a-3p, miR-142-3p, miR-16-1-3p, miR-133a-3p, miR-18a-3p, miR-212-5p, miR-1247-5p, miR-2284h-5p, miR-328-3p, novel\_17, miR-422a, miR-202-5p, miR-377-5p, miR-181b-1-3p, miR-486-3p, miR-143-3p, miR-2285ab, miR-18b, miR-2387, miR-18a-3p, miR-378b, miR-450b-3p, miR-1291, miR-6395, miR-195a-5p, miR-320b, miR-15a, miR-16a, miR-128-1-5p, miR-22-5p, miR-135a-2-3p, miR-1193, miR-

miR-548e-3p, miR-106a, miR-322-5p, miR-7859, miR-505-5p, miR-15a-5p, miR-545-5p, miR-214-5p, miR-3591-5p, miR-193b-5p, miR-2904, miR-411-3p, miR-105-2, miR-128-3p, miR-378d, miR-361-5p, miR-496, miR-183-5p, miR-20a, miR-29b-2-5p, miR-29b-1-5p, miR-199a-5p, miR-1957a, miR-29a-5p, miR-2285b, miR-192-3p, miR-219b-5p, miR-106a, miR-107, miR-200a-3p, miR-140-5p, miR-503-3p, miR-496-3p, miR-2285aa, miR-2355-5p, miR-370-3p, miR-141-3p, miR-1271, miR-300-3p, novel\_32, miR-199a-5p, miR-15b-5p, miR-488-3p, miR-21a-3p, miR-503-3p, miR-2285c, miR-93-5p, miR-17-5p, miR-7144-5p, miR-20b-5p, miR-625-5p, miR-1827, miR-16-5p, miR-425-5p, miR-93, miR-2433, miR-410-5p, miR-5100, miR-331-3p, miR-29b-2-5p, miR-665, miR-6516-3p, miR-129-5p, miR-424-5p, miR-103a-3p, miR-105-1, novel\_4, miR-2300a-5p, miR-3535, miR-2285g, miR-539-5p, miR-149-5p, miR-455-3p, miR-2459, miR-103, miR-2285e, miR-20b, miR-653, miR-708-3p, miR-1285, miR-1434-3p, novel\_23, miR-16b, miR-101a-5p, miR-497-5p, miR-424-5p, miR-106a-5p, miR-33a-5p, miR-8485, miR-29b-1-5p, miR-105-5p, miR-106a-5p, miR-16b, miR-106b-5p, miR-17-5p, miR-124-5p, miR-199b-5p, miR-216b-3p, miR-499b-5p, miR-374c-3p, miR-670-3p, miR-203-3p, miR-2285ab, miR-361-3p, miR-199b-5p, miR-216a-3p, miR-299b-5p, miR-136-5p, miR-107, miR-335-3p, miR-195a-5p, novel\_120, miR-2285f, novel\_27, miR-199b-5p, miR-218-5p, novel\_82, miR-15a, miR-20a-5p, miR-2440, miR-16a, miR-379-3p, novel\_1

miR-118b-3p, miR-147a, miR-1298-3p, miR-181b-2-3p, miR-199b-3p, miR-1343-3p, novel\_78, miR-1839-5p, miR-541, miR-8485, miR-1388-3p, miR-124a, miR-103a-2-5p, miR-491-5p, miR-487b-5p, miR-182-5p, miR-431-5p, miR-652-3p, miR-4443, miR-1185-2-3p, miR-378g, miR-3596, miR-2319b, miR-1983, miR-504, miR-668-5p, miR-409-5p, miR-423-5p, miR-190b-5p, miR-9-5p, miR-2447, miR-628-3p, novel\_82, miR-218-5p, miR-1247-5p, miR-2284h-5p, miR-328-3p, miR-30d-3p, miR-18a-3p, miR-218-1-3p, miR-34a-5p, miR-493-3p, miR-184-3p, miR-217-5p, miR-2366, miR-1961, miR-486-3p, miR-181b-1-3p, miR-2285w, miR-3653-3p, miR-2484, let-7k, miR-202-5p, miR-98-5p, miR-324-3p, miR-92a-1-5p, miR-26a-5p, let-7i-5p, miR-216b-3p, miR-296-3p, miR-2331-3p, miR-504-5p, miR-543-3p, miR-1827, miR-339b, miR-345-5p, miR-3184-5p, miR-6525, let-7b, miR-3184-3p, miR-129-2-3p, miR-190a-5p, miR-130b-5p, miR-30a-3p, miR-339-5p, miR-31-5p, miR-2284x, miR-197-3p, miR-22-3p, miR-431-3p, miR-432, miR-1843b-5p, miR-2113, miR-432-3p, miR-668-3p, let-7f-2-3p, miR-628-5p, let-7f-2-3p, novel\_51, miR-296-3p, miR-677, miR-669, miR-320c, miR-181b-3p, miR-374c-3p, miR-299b-3p, miR-26b-5p, novel\_68, let-7e-5p, miR-412-3p, miR-1306, miR-3970, miR-148a-3p, miR-576-3p, miR-28c, miR-129-1-3p, miR-505-5p, miR-9-5p, novel\_79, miR-431, miR-299a-3p, miR-429-3p, miR-330-5p, miR-1290, let-7g, miR-450c-5p, miR-192-3p, miR-450b-5p, miR-3064-5p, miR-152-3p, novel\_96, novel\_127, miR-200a-3p, let-7f-5p, miR-205-5p, miR-2355-5p, miR-125a, miR-1271, miR-3068-3p, miR-874-3p, miR-876-3p, miR-345-5p, miR-329b, miR-1260b, novel\_9, miR-6740-5p, miR-125b-5p, miR-216a-3p, novel\_4, miR-2300a-5p, miR-3120-5p, miR-30b-3p, miR-484, miR-4532, miR-652-5p, let-7a-5p, miR-104-3p, let-7a, miR-3085-3p, miR-3055-3p, miR-204-5p, miR-6516-3p, miR-138-5p, miR-3969, miR-151-3p, miR-6134, miR-338-3p, miR-378c, miR-378c, miR-1895, miR-376c-5p, miR-376c-5p, miR-200a-5p, miR-22-3p, novel\_25, miR-377-3p, miR-496-3p, miR-503-3p, miR-2331-3p, miR-378a-3p, miR-221-5p, miR-221-5p, miR-345-3p, miR-217, miR-422a, miR-664-3p, novel\_17, miR-2284a, miR-376c-5p, miR-376b-5p, miR-2284y, miR-142a-3p, miR-2284u, miR-496, miR-142-3p, miR-378a-3p, miR-217-5p, miR-501-3p, miR-2427, miR-378i, miR-3591-5p, miR-345-3p, miR-378h, miR-33a-3p, miR-502-3p, miR-211, miR-3059-5p, miR-342-3p, miR-378f, miR-376b-5p, miR-500-3p, miR-669, miR-378e, miR-211-5p, miR-664b, miR-2411-3p, miR-377-3p, miR-342, miR-2285r, miR-378d, miR-2284b, miR-138, miR-378c, miR-145a-5p, miR-501-3p, miR-22-3p, miR-7857, miR-378b, miR-194-3p, miR-142-3p, miR-145b, miR-151a-3p

SLC35C1 ENSOARGO(solute c:665, let-7f, miR-30e-3p, miR-149-5p, miR-134-3p, miR-3431, miR-339-5p, miR-31-5p, miR-2284x, miR-197-3p, miR-22-3p, miR-431-3p, miR-432, miR-1843b-5p, miR-2113, miR-432-3p, miR-668-3p, let-7f-2-3p, miR-628-5p, let-7f-2-3p, novel\_51, miR-296-3p, miR-677, miR-669, miR-320c, miR-181b-3p, miR-374c-3p, miR-299b-3p, miR-26b-5p, novel\_68, let-7e-5p, miR-412-3p, miR-1306, miR-3970, miR-148a-3p, miR-576-3p, miR-28c, miR-129-1-3p, miR-505-5p, miR-9-5p, novel\_79, miR-431, miR-299a-3p, miR-429-3p, miR-330-5p, miR-1290, let-7g, miR-450c-5p, miR-192-3p, miR-450b-5p, miR-3064-5p, miR-152-3p, novel\_96, novel\_127, miR-200a-3p, let-7f-5p, miR-205-5p, miR-2355-5p, miR-125a, miR-1271, miR-3068-3p, miR-874-3p, miR-876-3p, miR-345-5p, miR-329b, miR-1260b, novel\_9, miR-6740-5p, miR-125b-5p, miR-216a-3p, novel\_4, miR-2300a-5p, miR-3120-5p, miR-30b-3p, miR-484, miR-4532, miR-652-5p, let-7a-5p, miR-104-3p, let-7a, miR-3085-3p, miR-3055-3p, miR-204-5p, miR-6516-3p, miR-138-5p, miR-3969, miR-151-3p, miR-6134, miR-338-3p, miR-378c, miR-378c, miR-1895, miR-376c-5p, miR-376c-5p, miR-200a-5p, miR-22-3p, novel\_25, miR-377-3p, miR-496-3p, miR-503-3p, miR-2331-3p, miR-378a-3p, miR-221-5p, miR-221-5p, miR-345-3p, miR-217, miR-422a, miR-664-3p, novel\_17, miR-2284a, miR-376c-5p, miR-376b-5p, miR-2284y, miR-142a-3p, miR-2284u, miR-496, miR-142-3p, miR-378a-3p, miR-217-5p, miR-501-3p, miR-2427, miR-378i, miR-3591-5p, miR-345-3p, miR-378h, miR-33a-3p, miR-502-3p, miR-211, miR-3059-5p, miR-342-3p, miR-378f, miR-376b-5p, miR-500-3p, miR-669, miR-378e, miR-211-5p, miR-664b, miR-2411-3p, miR-377-3p, miR-342, miR-2285r, miR-378d, miR-2284b, miR-138, miR-378c, miR-145a-5p, miR-501-3p, miR-22-3p, miR-7857, miR-378b, miR-194-3p, miR-142-3p, miR-145b, miR-151a-3p

ZMAT4 ENSOARGO(zinc fin.

miR-365a-5p, miR-93, miR-1197-3p, miR-16-5p, miR-133a-3p, miR-28a-3p, miR-486b-3p, miR-28-5p, miR-138-5p, miR-29b-3p, miR-769, miR-25-3p, miR-370-3p, miR-215-5p, miR-874-3p, miR-7144-5p, miR-23a-5p, miR-20b-5p, miR-329b, miR-93-5p, miR-3154, miR-18a, miR-17-5p, novel\_39, miR-1271-3p, miR-92b-3p, miR-2385-3p, miR-30a-3p, miR-181a-2-3p, miR-152-3p, novel\_96, novel\_127, miR-92a-3p, miR-17-3p, miR-450a-2-3p, miR-28-3p, miR-127-5p, miR-217, miR-376b-3p, miR-664-3p, miR-2284z, miR-582-3p, miR-322-5p, miR-758-5p, miR-18b-5p, miR-6517, miR-29d-3p, miR-1343-5p, miR-23b-5p, miR-345-3p, novel\_27, miR-2428, miR-24-3p, miR-193b-3p, miR-1839-3p, miR-17-3p, miR-29c-3p, novel\_120, miR-335-5p, miR-6123, miR-92a-3p, miR-29a, miR-16a, miR-15a, miR-4324, miR-20a-5p, miR-669, miR-670-3p, novel\_69, miR-29a-3p, miR-320b, miR-3120-3p, novel\_68, miR-3074-5p, miR-378b, miR-6395, miR-6516-3p, miR-195a-5p, miR-410-5p, miR-412-3p, miR-3970, miR-150-5p, miR-378b, miR-376b-3p, miR-18a-3p, miR-18b, miR-148a-3p, miR-654-3p, miR-432-3p, miR-432-3p, miR-6240, miR-1343-5p, miR-193a-3p, miR-32, miR-365b-5p, miR-330-3p, miR-17-5p, miR-106a-5p, miR-455-5p, miR-2411-3p, miR-7-5p, miR-20b, miR-2355-3p, miR-134-3p, miR-185-5p, miR-26b-3p, miR-133b-5p, miR-497-5p, miR-455-5p, miR-29b, miR-138, miR-30b-3p, miR-16b, miR-145a-5p, miR-542-3p, miR-7b-5p, miR-769-5p, miR-6525, miR-3958-5p, miR-425-5p, miR-214, miR-145a-3p, miR-3074-5p, miR-4492, miR-708-5p, miR-424-5p, miR-17-3p, miR-6516-3p, miR-664a, miR-451a, miR-30a-3p, miR-665, miR-30e-3p, miR-15b-5p, miR-877-5p, miR-192-5p, miR-582-5p, miR-2284s, miR-216b-5p, miR-139-5p, miR-193b-3p, miR-296-3p, miR-532-5p, miR-552-3p, miR-2331-3p, miR-140-5p, miR-32-5p, miR-1827, miR-582-5p, miR-186-5p, miR-18a-5p, miR-486-3p, miR-2424, miR-143-3p, miR-664b-3p, miR-195a-3p, miR-20a, miR-245-3p, miR-2285k, miR-96-5p, miR-1291, miR-195a-5p, miR-9851-3p, miR-299b-3p, miR-677, miR-664b, miR-541-5p, miR-3968, miR-6119-3p, miR-576-3p, miR-218-5p, miR-502-5p, miR-15a, miR-16a, miR-371b-3p, miR-544a, miR-16b, miR-30b-3p, miR-497-5p, miR-296-5p, miR-374b-3p, miR-30b-3p, miR-412-5p, miR-544b, novel\_116, miR-2300a-5p, miR-31-5p, miR-1185-5p, miR-1343-5p, miR-582, miR-224-5p, miR-16b, novel\_19, miR-382-3p, miR-424-5p, miR-1388-3p, novel\_99, miR-7144-5p, miR-27a-5p, miR-544-3p, miR-15b-5p, miR-574-5p, miR-221-5p, miR-2355-5p, miR-3065-3p, miR-424-5p, miR-3604, miR-224-5p, miR-2330-3p, miR-1271, miR-3607-3p, miR-16-5p, miR-378d, miR-193b-5p, miR-1343-5p, miR-1271-5p, miR-15a-5p, miR-505-5p, miR-322-5p, miR-6517, miR-299a-3p, miR-3960, miR-1b-3p, miR-21-3p, miR-299-3p, miR-221-5p, miR-664-3p, miR-210-5p, miR-2285i, miR-29a-5p, miR-3065-3p, miR-181a-2-3p

TUFM

ENSOARGO(Tu trans

ZDHHC4

ENSOARGO(zinc fin

miR-205-5p, miR-664-3p, miR-3071-3p, miR-181b-5p, miR-200c-3p, miR-1, miR-29b-2-5p, miR-30a-3p, miR-3064-5p, miR-4286, miR-181a-2-3p, miR-29a-5p, novel\_39, miR-345-3p, miR-134, miR-411-3p, miR-200b-3p, miR-299a-3p, miR-429-3p, miR-1224-5p, miR-1271-5p, miR-6516-5p, miR-2411-5p, miR-134-5p, miR-450a-1-3p, miR-2284k, novel\_63, miR-125b-5p, miR-135a-5p, miR-592, miR-134-5p, miR-486b-3p, miR-376c-5p, miR-320a, miR-3154, miR-10b-3p, let-7g-3p, miR-376c-5p, miR-574-5p, miR-2355-5p, miR-125a, miR-1271, miR-769, miR-223-5p, miR-146a, miR-190a, miR-2411-3p, miR-455-5p, miR-124-5p, miR-125a-5p, miR-493-5p, miR-2285r, miR-432-3p, miR-432-3p, miR-223-3p, miR-181a-5p, miR-450c-3p, miR-30b-3p, miR-219a-1-3p, miR-16-1-3p, miR-455-5p, miR-2284x, miR-3955-5p, miR-26b-3p, miR-134-3p, novel\_1, miR-206, miR-203b-5p, novel\_101, miR-2428, miR-376b-5p, miR-412-3p, miR-146b-5p, miR-6516-3p, miR-505-3p, miR-135b-5p, miR-379-5p, miR-329-5p, novel\_69, miR-299b-3p, miR-670-3p, miR-669, miR-320c, miR-677, miR-181b-3p, miR-2285p, novel\_17, miR-324-3p, miR-125b, miR-345-3p, miR-320d, miR-2284m, miR-466i-5p, miR-221-5p, miR-3653-3p, miR-299-3p, miR-21-3p, miR-29b-1-5p, miR-130a-5p, miR-181b-1-3p, miR-2411, miR-146a-5p, miR-486-3p, miR-2366, miR-1193, miR-5703, miR-4429, miR-16-1-3p, miR-3600, miR-505-3p, miR-200b, miR-30a-3p, miR-665, miR-29b-2-5p, miR-450b-3p, miR-6516-3p, miR-487b-5p, miR-129-5p, miR-190a-5p, miR-1271, miR-2330-3p, miR-3074-2-3p, miR-769-5p, miR-206-3p, miR-181c-5p, miR-450a-1-3p, miR-221-5p, miR-140-5p, miR-182-5p, miR-6516, miR-320b, novel\_115, miR-29b-1-5p, miR-182-5p, miR-3085-3p, miR-146b, miR-6529a, miR-143-5p, miR-1a-3p, miR-30b-3p, miR-1388-5p, miR-450b-5p, miR-101c, miR-5010-3p, miR-181b-2-3p, miR-455-3p, miR-9788-3p, miR-371a-5p, miR-769-5p, miR-885-5p, miR-181d-5p, miR-2284i, miR-190b-5p, miR-7705, miR-96-3p, miR-450b-5p, miR-107, miR-221-5p, novel\_127, miR-17-3p, miR-466i-5p, miR-412-5p, miR-92a-1-5p, miR-185-3p, miR-125a-3p, novel\_121, miR-210-3p, miR-322-5p, miR-483-3p, miR-15a-5p, miR-412, miR-431, miR-18a-3p, miR-128-3p, miR-193b-5p, miR-16-5p, miR-193a-5p, miR-424-5p, miR-874-5p, miR-4492, miR-17-3p, miR-320e, miR-5100, miR-370-5p, miR-22-3p, miR-15b-5p, miR-154b-5p, miR-370-3p, miR-370-5p, miR-3956, miR-296-3p, miR-221-5p, miR-874-3p, miR-137-3p, miR-628-5p, miR-424-5p, miR-6240, miR-452-5p, miR-103a-2-5p, miR-483-3p, novel\_19, miR-330-3p, miR-16b, miR-431-5p, miR-216a-3p, miR-194-3p, miR-411b-5p, miR-103, miR-134-3p, miR-147a, miR-103a-3p, miR-330-3p, miR-497-5p, miR-4508, miR-16b, miR-197-3p, miR-412-3p, miR-22-3p, miR-2284r, miR-1843b-5p, miR-143-5p, miR-2428, miR-1307-3p, miR-24-3p, miR-3957-3p, miR-17-3p, miR-1193, novel\_60, miR-3956-3p, miR-6123, miR-1307-5p, miR-16a, miR-107-5p, miR-502-5p, miR-15a, miR-412-5p, miR-2440, miR-669, miR-378g, miR-369-5p, miR-195a-5p, miR-107, miR-18a-3p, miR-129b-5p, miR-216a-3p, miR-361-3p, miR-2387

HNRNPDL ENSOARGO(heteroge

KISS1 ENSOARGO(KISS-1 m

miR-54b-5p, miR-24-2-5p, miR-7641, let-7a-2-3p, miR-10b-2, miR-200b-3p, miR-411-3p, miR-30a-5p, miR-29d-3p, miR-3578, miR-345-3p, miR-1957a, miR-28b, miR-4286, miR-181a-2-3p, miR-1, miR-3529-3p, miR-200c-3p, miR-17-3p, miR-450a-2-3p, miR-217, miR-30c-2-3p, miR-6119-5p, miR-200c, miR-376b-3p, miR-2284n, miR-374c-3p, miR-615-5p, miR-1814c, miR-671-5p, let-7g-3p, miR-320a, miR-17-5p, miR-362-5p, miR-93, miR-500b-5p, miR-133a-3p, miR-3607-3p, miR-6128, miR-374b, miR-410-3p, miR-138-5p, miR-3969, miR-370-5p, miR-29b-3p, miR-410-5p, miR-20b, miR-185-5p, miR-2285g, miR-2284d, miR-2889, miR-455-5p, miR-138, miR-2284ab, miR-29b, miR-30b-3p, miR-380-3p, miR-3071-5p, miR-194-5p, miR-374b-3p, miR-1434-3p, miR-873a-5p, miR-345-5p, miR-539-3p, miR-1343-5p, miR-106a-5p, miR-455-5p, miR-17-5p, miR-330-3p, miR-190a, miR-224-5p, miR-29a-3p, miR-670-3p, miR-2404, miR-655-5p, miR-6516-3p, miR-195a-5p, miR-7975, miR-376b-3p, miR-18a-3p, miR-2428, miR-24-3p, miR-1193, miR-17-3p, miR-342-3p, novel\_120, miR-502b, miR-203b-5p, novel\_1, miR-16a, miR-20a-5p, miR-15a, miR-532-3p, miR-15a-5p, miR-200b, miR-487a-3p, miR-485-3p, miR-548e-3p, miR-4429, miR-5703, miR-188-3p, miR-2904, miR-124-3p, miR-20a, miR-216c-5p, miR-21-3p, miR-30d, miR-1277-5p, miR-30b-3p, miR-466i-5p, miR-320d, miR-106a, miR-2284m, miR-374a-5p, miR-196a-3p, miR-22-3p, novel\_25, miR-204-3p, miR-139-5p, miR-532-5p, miR-370-5p, miR-30f, miR-154b-3p, let-7g-3p, miR-133b-3p, let-7f-1-3p, miR-21a-3p, miR-206-3p, miR-145a-3p, miR-424-5p, miR-664a, miR-6516-3p, miR-17-3p, miR-324-3p, miR-2285e, miR-500-5p, miR-105-1, miR-151a-3p, miR-2284aa, miR-2426, miR-30b-3p, miR-4791, miR-484, miR-758-3p, miR-491-3p, miR-30c-1-3p, miR-33a-5p, let-7c-3p, miR-424-5p, miR-106a-5p, miR-320b, miR-342, miR-376d, miR-7977, miR-541-5p, miR-8095, miR-

PPP2R5C ENSOARGO protein

miR-212-3p, miR-769-5p, miR-2285y, miR-1973, miR-382-3p, miR-2285n, miR-2285t, miR-2284q, miR-2285u, miR-211-5p, miR-2284g, miR-3064-5p, miR-1185-2-3p, miR-129b-5p, miR-378j, miR-877-3p, miR-504, miR-1388-3p, miR-424-5p, miR-3187-3p, miR-16b, miR-214-3p, miR-3085-3p, miR-9788-3p, miR-1185-3p, miR-425-3p, miR-21b, miR-2426, miR-214, miR-769-5p, miR-665, miR-424-5p, miR-450b-3p, miR-296-3p, miR-504-5p, miR-15b-5p, miR-193b-3p, miR-27b-5p, miR-299, miR-450a-1-3p, let-7g-3p, miR-18a-5p, miR-2887, miR-329a-5p, miR-183-5p, miR-486-3p, miR-299-3p, miR-202-5p, miR-3960, miR-15a-5p, miR-200b, miR-188-3p, miR-5703, miR-2366, miR-2284u, miR-378d, miR-184-3p, miR-3957-3p, miR-193b-3p, miR-2428, miR-2285m, miR-211, miR-16a, miR-425-5p, miR-15a, miR-329-5p, miR-299b-3p, miR-3141, miR-18b, miR-7975, miR-135b-5p, miR-195a-5p, miR-107, let-7f-2-3p, miR-380-5p, let-7a-2-3p, miR-654-3p, miR-3141, miR-1343-5p, miR-193a-3p, miR-378a-5p, miR-31-5p, miR-187-3p, miR-103a-3p, miR-103, miR-185-5p, miR-450c-3p, miR-374b-3p, miR-3071-5p, miR-708-3p, miR-542-3p, miR-497-5p, miR-16b, miR-16-5p, miR-1306-5p, miR-10b-3p, miR-135a-5p, miR-134-5p, miR-204-5p, miR-486b-3p, miR-767-5p, miR-542-5p, miR-615-5p, miR-574-5p, miR-300-3p, miR-769, miR-200a-5p, miR-3154, miR-18a, miR-2448-3p, miR-7144-5p, miR-671-5p, miR-767, let-7g-3p, miR-329b, miR-3064-5p, miR-2403, miR-2284y, miR-1271-3p, miR-450b-5p, miR-380-5p, miR-2285af, miR-200c, miR-107, miR-450a-2-3p, miR-200c-3p, miR-18b-5p, miR-299a-3p, miR-2285ad, miR-6517, miR-429-3p, miR-134-5p, miR-450a-1-3p, miR-214-5p, miR-24-2-5p, miR-322-5p, miR-1343-5p, miR-345-3p, miR-134, miR-1290, miR-200b-3p, let-7a-2-3p



miR-127-5p, miR-1a-2-5p, miR-17-3p, miR-200a-3p, novel\_96, miR-1260a, miR-2285af, miR-2478, miR-1271-3p, miR-199a-5p, miR-181a-2-3p, miR-4286, miR-29b-2-5p, miR-3064-5p, miR-2385-3p, miR-300, miR-128-3p, miR-1290, miR-2427, miR-29d-3p, miR-1343-5p, miR-378h, miR-483-3p, miR-322-5p, novel\_121, miR-582-3p, miR-545-5p, miR-6517, miR-222, miR-767-5p, miR-204-5p, miR-29b-3p, miR-1-5p, miR-3969, miR-1197-3p, miR-1260b, miR-500b-5p, miR-378c, miR-145-3p, miR-374b, miR-193a-5p, miR-3607-3p, miR-16-5p, miR-767, miR-381-3p, miR-362-5p, miR-34c-5p, miR-374c-3p, miR-199a-5p, miR-1271, miR-141-3p, miR-2355-5p, miR-370-3p, miR-378a-5p, miR-483-3p, miR-193a-3p, miR-1343-5p, miR-377-3p, miR-330-3p, miR-432-3p, miR-6240, miR-1260b, miR-29b, miR-16b, miR-744-5p, miR-188-5p, miR-497-5p, miR-1434-3p, miR-432, miR-374b-3p, miR-185-5p, miR-134-3p, miR-432-5p, miR-412-5p, miR-544b, miR-194-3p, miR-340-3p, miR-26b-3p, miR-29a, novel\_1, miR-128-1-5p, miR-502b, miR-6529b, miR-15a, miR-16a, miR-34c, miR-211, miR-199b-5p, miR-449a, miR-335-5p, miR-1a-1-5p, miR-17-3p, miR-29c-3p, miR-193b-3p, miR-412-3p, miR-195a-5p, miR-378f, miR-216a-3p, miR-150-5p, miR-374c-3p, miR-670-3p, miR-29a-3p, miR-34b, miR-26b-5p, miR-320b, miR-34b-5p, miR-210-5p, miR-374a-5p, miR-26a-5p, miR-2285p, miR-422a, miR-500a-5p, miR-29b-1-5p, miR-183-5p, miR-34a-5p, miR-378d, miR-2366, miR-193b-5p, miR-378i, miR-5703, miR-378a-3p, miR-124-3p, miR-2904, miR-15a-5p, miR-30d-3p, miR-17-3p, miR-6516-3p, miR-424-5p, miR-487a-5p, miR-222-3p, miR-664a-5p, miR-29b-2-5p, miR-132-5p, miR-3184-5p, miR-145a-3p, miR-378c, novel\_99, miR-582-5p, miR-193b-3p, miR-582-5p, miR-544-3p, miR-2284s, miR-377-3p, miR-15b-5p, miR-548o-3p, miR-378a-3p, miR-140-5p, miR-182-5p, miR-3955-3p, miR-491-5p, miR-3085-3p, miR-100b-5p, miR-16b, miR-182-5p, miR-20b-1-5p, miR-

miR-135a-5p, miR-6740-5p, novel\_63, miR-29b-3p, miR-374b-3p, miR-767-5p, miR-16-5p, miR-6128, miR-2284v, miR-1306-5p, miR-145-3p, miR-1197-3p, miR-7144-5p, miR-767, miR-1271, miR-215-5p, miR-141-3p, miR-370-3p, miR-2284n, miR-199a-5p, miR-25-3p, miR-217, miR-200c, miR-2285af, miR-92a-3p, miR-200a-3p, miR-127-5p, miR-6536, miR-181b-5p, miR-200c-3p, miR-30a-3p, miR-29b-2-5p, miR-2285b, miR-192-3p, miR-199a-5p, miR-92b-3p, miR-29d-3p, miR-2427, miR-200b-3p, miR-582-3p, miR-7641, miR-429-3p, miR-545-5p, miR-2284z, miR-322-5p, miR-505-5p, miR-382-5p, miR-16a, miR-208a-3p, miR-133a-5p, miR-15a, miR-29a, miR-6119-3p, miR-92a-3p, miR-495-3p, miR-29c-3p, miR-1839-3p, miR-342-3p, miR-219b-3p, miR-199b-5p, miR-2284w, miR-323c, miR-135b-5p, miR-195a-5p, miR-19a-3p, miR-7-1-3p, miR-29a-3p, miR-2404, miR-330-3p, miR-32, miR-466f-3p, miR-493-5p, miR-6240, miR-2284l, miR-2285r, miR-181a-3p, miR-1285, miR-497-5p, miR-29b, miR-30b-3p, miR-16b, miR-2284ab, miR-133b-5p, miR-3431, miR-2284d, miR-664a-5p, miR-29b-2-5p, miR-30a-3p, miR-324-3p, miR-30e-3p, miR-500, miR-424-5p, miR-4492, miR-129-5p, miR-6516-3p, miR-3074-2-3p, miR-433-5p, miR-181c-5p, miR-500a-3p, miR-582-5p, novel\_99, miR-186-5p, miR-543-3p, miR-296-3p, miR-140-5p, miR-32-5p, miR-15b-5p, miR-192-5p, miR-499b-3p, miR-92a-1-5p, miR-208b-3p, miR-210-5p, miR-1277-5p, miR-30b-3p, miR-202-5p, miR-216c-5p, miR-2432, miR-217-5p, miR-1197-5p, miR-124-3p, miR-215-5p, miR-361-5p, miR-133a-3p, miR-19b-3p, miR-30d-3p, miR-212-5p, miR-485-3p, miR-548e-3p, miR-616-3p, miR-200b, miR-15a-5p, miR-7859, miR-487a-3p, miR-101-3p, miR-374a-3p, miR-181d-5p, miR-199b-5p, miR-493-5p, miR-20a-3p, miR-10b, miR-454-5p, miR-2483-3p, miR-3082-5p, miR-25, miR-499a-3p, miR-16b, miR-505, miR-2957, miR-342, miR-199b-5p, miR-652-5p, let-7c-3p, miR-1839-3p, miR-424-5p, miR-382-3p, miR-124a, miR-21a-3p, miR-335-3p, miR-3074-1-3p, miR-135b-5p, novel\_99, miR-574-5p, miR-221-5p, miR-329-5p, miR-370-5p, miR-3120-3p, miR-532-5p, miR-7-1-3p, miR-7857-3p, miR-377-3p, miR-3082-5p, miR-203-3p, miR-370-5p, miR-371a-5p, miR-107-5p, miR-135a-5p, miR-22-5p, miR-3059-5p, miR-1193, miR-376a-5p, miR-1197-5p, miR-30b-3p, miR-30b-3p, miR-33b-3p, miR-450b-5p, miR-188-5p, miR-330-3p, miR-222-5p, miR-411-5p, miR-377-3p, miR-618, miR-330-3p, miR-466i-5p, miR-30b-3p, miR-221-5p, miR-466f-3p, miR-103a-2-5p, miR-329a-5p, miR-6240, miR-369-3p, miR-495-5p, miR-376a-5p, miR-2424, miR-8485, novel\_1, miR-219-3p, miR-219b-3p, miR-219a-2-3p, miR-199b-5p, miR-199a-5p, let-7c-3p, miR-23a-3p, let-7g-3p, miR-199b-5p, miR-140-5p, miR-23b, miR-23c, miR-23b-3p, miR-199a-5p, miR-409b

DDX3X ENSOARGO( DEAD (As: 5p, miR-1285, miR-497-5p, miR-29b, miR-30b-3p, miR-16b, miR-2284ab, miR-133b-5p, miR-3431, miR-2284d, miR-664a-5p, miR-29b-2-5p, miR-30a-3p, miR-324-3p, miR-30e-3p, miR-500, miR-424-5p, miR-4492, miR-129-5p, miR-6516-3p, miR-3074-2-3p, miR-433-5p, miR-181c-5p, miR-500a-3p, miR-582-5p, novel\_99, miR-186-5p, miR-543-3p, miR-296-3p, miR-140-5p, miR-32-5p, miR-15b-5p, miR-192-5p, miR-499b-3p, miR-92a-1-5p, miR-208b-3p, miR-210-5p, miR-1277-5p, miR-30b-3p, miR-202-5p, miR-216c-5p, miR-2432, miR-217-5p, miR-1197-5p, miR-124-3p, miR-215-5p, miR-361-5p, miR-133a-3p, miR-19b-3p, miR-30d-3p, miR-212-5p, miR-485-3p, miR-548e-3p, miR-616-3p, miR-200b, miR-15a-5p, miR-7859, miR-487a-3p, miR-101-3p, miR-374a-3p, miR-181d-5p, miR-199b-5p, miR-493-5p, miR-20a-3p, miR-10b, miR-454-5p, miR-2483-3p, miR-3082-5p, miR-25, miR-499a-3p, miR-16b, miR-505, miR-2957, miR-342, miR-199b-5p, miR-652-5p, let-7c-3p, miR-1839-3p, miR-424-5p, miR-382-3p, miR-124a, miR-21a-3p, miR-335-3p, miR-3074-1-3p, miR-135b-5p, novel\_99, miR-574-5p, miR-221-5p, miR-329-5p, miR-370-5p, miR-3120-3p, miR-532-5p, miR-7-1-3p, miR-7857-3p, miR-377-3p, miR-3082-5p, miR-203-3p, miR-370-5p, miR-371a-5p, miR-107-5p, miR-135a-5p, miR-22-5p, miR-3059-5p, miR-1193, miR-376a-5p, miR-1197-5p, miR-30b-3p, miR-30b-3p, miR-33b-3p, miR-450b-5p, miR-188-5p, miR-330-3p, miR-222-5p, miR-411-5p, miR-377-3p, miR-618, miR-330-3p, miR-466i-5p, miR-30b-3p, miR-221-5p, miR-466f-3p, miR-103a-2-5p, miR-329a-5p, miR-6240, miR-369-3p, miR-495-5p, miR-376a-5p, miR-2424, miR-8485, novel\_1, miR-219-3p, miR-219b-3p, miR-219a-2-3p, miR-199b-5p, miR-199a-5p, let-7c-3p, miR-23a-3p, let-7g-3p, miR-199b-5p, miR-140-5p, miR-23b, miR-23c, miR-23b-3p, miR-199a-5p, miR-409b

DIAPH2 ENSOARGO( diaphano

CHEK2 ENSOARGO( checkpoi

miR-193b-3p, miR-17-3p, miR-49b-3p, novel\_120, miR-1a-1-5p, novel\_27, miR-301b-3p, miR-2428, miR-199b-5p, miR-211, miR-323c, miR-16a, miR-382-5p, miR-15a, miR-142b, miR-502b, miR-379-3p, miR-320b, novel\_68, miR-378b, miR-216b-3p, miR-6535, miR-411b-3p, miR-3065-5p, miR-216a-3p, miR-21c, miR-378b, miR-376b-5p, miR-148a-3p, miR-146b-5p, miR-7975, miR-195a-5p, miR-107, miR-19a-3p, miR-628-5p, miR-539-3p, miR-2284l, miR-7-5p, miR-146a, miR-193a-3p, miR-378a-5p, miR-130a-3p, miR-26b-3p, miR-103a-3p, miR-103, miR-3535, miR-3071-5p, miR-145a-5p, miR-7b-5p, miR-497-5p, miR-27b-3p, miR-21-5p, miR-2284ab, miR-16b, miR-16-1-3p, miR-16-5p, miR-2284v, miR-181c-3p, miR-500b-5p, miR-410-5p, miR-1-5p, novel\_63, miR-494-5p, miR-410-3p, miR-204-5p, miR-370-3p, miR-2285aa, miR-3956, miR-141-3p, miR-874-3p, miR-3068-3p, miR-199a-5p, miR-331-5p, miR-769, miR-376c-5p, miR-362-5p, miR-30e-5p, miR-376c-5p, miR-3064-5p, miR-181a-2-3p, miR-199a-5p, miR-3065-3p, miR-29a-5p, miR-3956-5p, miR-192-3p, miR-1271-3p, miR-148b-5p, miR-450b-5p, miR-2478, miR-30f, miR-181c-3p, miR-125a-3p, miR-107, miR-152-3p, miR-200a-3p, miR-17-3p, miR-1a-2-5p, miR-222, miR-582-3p, novel\_121, miR-214-5p, miR-129-1-3p, miR-486-5p, miR-322-5p, miR-758-5p, miR-23b-5p, miR-3578, miR-30c, miR-128-3p, miR-411-3p, miR-6527, miR-2447, miR-1285-5p, miR-362-5p, miR-769-5p, miR-30b-5p, miR-1843a-3p, miR-490-5p, miR-628-3p, miR-7689-3p, miR-211-5p, miR-3064-5p, miR-20a-3p, miR-10b, miR-27a-3p, miR-499a-3p, miR-7857-3p, miR-199b-5p, miR-221, miR-181a-3p, miR-136-5p, let-7c-3p, miR-1388-3p, miR-424-5p, miR-758-3p, miR-1b-5p, miR-505, miR-16b, miR-146b, miR-199b-5p, miR-3085-3p, miR-1185-5p, miR-130b-3p, miR-145b, miR-27a-3p, miR-1343-3p, miR-151a-3p, miR-548w, miR-500-5p, miR-221-3p, miR-148b-5p, miR-142-3p, miR-142-5p, miR-147a, miR-136-3p, miR-342-3p, miR-22-5p, miR-490-5p, miR-6402, miR-144-5p, miR-203-3p, miR-6535, miR-499a-3p, miR-10b, miR-2319b, miR-2284g, novel\_94, miR-146b-5p, miR-129b-5p, miR-1306, miR-654-3p, miR-432-3p, miR-2284b, miR-363-5p, miR-23a-3p, miR-6240, miR-1388-3p, miR-146b, miR-1343-5p, miR-182-5p, miR-330-3p, miR-1306-5p, miR-146a, miR-342, miR-185-5p, miR-3431, miR-26b-3p, miR-330-3p, miR-31-5p, miR-340-3p, miR-450b-5p, miR-1388-5p, miR-30b-3p, miR-380-3p, miR-3071-5p, miR-374b-3p, miR-30b-3p, miR-484, miR-144-5p, miR-133a-3p, miR-2330-3p, miR-3607-3p, miR-155-5p, miR-155-5p, miR-365a-3p, miR-499b-3p, miR-182-5p, miR-140-5p, miR-671-5p, miR-625-5p, miR-876-3p, miR-10b-3p, miR-133b-3p, miR-23b, miR-129b-3p, miR-137-3p, miR-380-3p, miR-2284a, miR-376c-5p, miR-376b-5p, miR-2284y, miR-146a-5p, miR-376a-5p, miR-200c-3p, miR-202-5p, miR-200c, miR-2285p, novel\_121, miR-23c, miR-200b, miR-23b-3p, miR-302a-5p, miR-7859, miR-505-5p, miR-3600, miR-429-3p, miR-548e-3p, miR-2284u, miR-133a-3p, miR-155-5p, miR-200b-3p, miR-140-3p, miR-1343-5p

GNL3

ENSOARGO(Guanine)

PREX2

ENSOARGO(Phosphat)

miR-2284w, miR-323c, miR-211, miR-190b-5p, miR-29c-3p, miR-495-3p, miR-335-5p, miR-885-5p, miR-135a-2-3p, miR-29a, miR-335, novel\_87, miR-371a-5p, miR-20a-5p, miR-6402, miR-101-3p, miR-3613, miR-376d, miR-1185-2-3p, miR-411b-3p, miR-29a-3p, miR-2483-3p, miR-2404, miR-7857-3p, miR-146b-3p, miR-499a-3p, miR-211-5p, miR-7689-3p, miR-329-5p, miR-139-5p, miR-3064-5p, miR-1983, miR-335-3p, miR-376a-3p, miR-412-3p, miR-216a-3p, miR-376b-3p, miR-221, miR-8485, miR-432-3p, miR-106a-5p, miR-452-5p, miR-3085-3p, miR-106a-5p, novel\_51, miR-106b-5p, miR-17-5p, miR-105-5p, miR-1185-3p, miR-20b, miR-221-3p, miR-376b-3p, novel\_4, miR-105-1, miR-101c, miR-16-2-3p, miR-450b-5p, miR-380-3p, miR-29b, novel\_23, miR-1843b-5p, miR-223-3p, miR-1434-3p, miR-93, miR-425-5p, miR-590-3p, miR-204-5p, miR-767-5p, miR-3604, miR-3969, miR-338-5p, miR-320e, miR-664a-5p, miR-222-3p, miR-34c-3p, miR-29b-3p, miR-877-5p, miR-139-5p, miR-216b-5p, miR-499b-3p, miR-141-3p, miR-532-5p, miR-3065-3p, miR-2285aa, miR-485-5p, miR-20b-5p, miR-767, miR-433-3p, miR-17-5p, miR-93-5p, miR-3613-5p, miR-488-3p, miR-380-3p, miR-143-3p, miR-3065-3p, miR-421-5p, miR-3064-5p, miR-20a, miR-329a-5p, miR-200a-3p, miR-106a, miR-2285p, miR-376b-3p, miR-106a, miR-222, miR-128-3p, miR-142-3p, miR-1193, miR-29d-3p

miR-3955-3p, miR-125a-5p, let-7e, miR-1306-5p, miR-190a, miR-365b-5p, miR-29b-1-5p, novel\_51, miR-2284l, let-7a-5p, miR-2483-5p, miR-744-3p, miR-1260b, miR-3432b, miR-2426, miR-3120-5p, miR-744-5p, miR-143-5p, miR-10b, miR-197-3p, miR-147a, let-7g-5p, miR-2355-3p, miR-665, miR-181b-2-3p, miR-421-5p, novel\_82, miR-34c, let-7i, miR-24-3p, miR-423-5p, miR-449a, miR-2447, miR-190b-5p, miR-219a-5p, miR-136-5p, miR-335-3p, let-7e-5p, miR-1306, miR-18a-3p, miR-499a-3p, miR-34b, miR-411b-3p, let-7d-5p, miR-677, miR-181b-3p, miR-10a-5p, miR-760-3p, miR-98-5p, let-7f-5p, miR-34b-5p, miR-543-5p, let-7k, novel\_127, miR-1260a, miR-2285p, miR-125a-3p, miR-216a-5p, let-7c-5p, miR-125b, miR-450b-5p, miR-29b-1-5p, miR-181b-1-3p, miR-130a-5p, miR-2424, let-7g, miR-29b-2-5p, let-7d, miR-34a-5p, miR-10a-5p, miR-134, miR-1961, miR-2366, miR-5703, miR-140-3p, miR-134-5p, novel\_121, miR-18a-3p, miR-1b-3p, miR-190a-5p, miR-592, miR-134-5p, let-7f, miR-125b-5p, miR-29b-2-5p, miR-3969, miR-10b-5p, miR-346, miR-1260b, miR-3184-5p, miR-365a-5p, let-7b-5p, let-7b, miR-145a-3p, miR-1248, miR-10a, miR-499b-3p, miR-34c-5p, miR-365a-3p, miR-3959-5p, miR-204-3p, let-7i-5p, miR-874-3p, miR-370-3p, miR-125a, miR-1271

MLF1 ENSOARGO(myeloid)

PGC ENSOARGO(progastr)

miR-2285r, miR-432-3p, miR-2284l, miR-668-3p, miR-483-3p, miR-378a-5p, miR-146a, miR-365b-5p, miR-2285v, miR-194a, novel\_51, miR-3535, miR-134-3p, miR-3431, miR-149-5p, miR-339-5p, miR-16b, miR-497-5p, miR-2284x, miR-432, miR-1843b-5p, miR-542-3p, miR-2113, miR-22-3p, miR-2285m, miR-625-3p, miR-4324, miR-28c, miR-2284o, miR-144-3p, miR-669, miR-320c, novel\_68, miR-329-5p, miR-146b-5p, miR-148a-3p, miR-3970, miR-148b-5p, novel\_39, miR-2284y, miR-192-3p, miR-2284f, miR-127-5p, miR-152-3p, novel\_127, novel\_96, miR-205-5p, miR-322-5p, miR-129-1-3p, novel\_79, miR-1343-5p, miR-330-5p, miR-1260b, miR-1197-3p, miR-16-5p, novel\_9, novel\_63, miR-2284k, miR-6740-5p, miR-3959-5p, miR-874-3p, miR-542-5p, miR-1271, miR-876-3p, miR-329b, miR-20b-5p, miR-93-5p, miR-2284b, miR-491-5p, miR-146b, miR-103a-2-5p, miR-29b-1-5p, novel\_19, miR-106b-5p, miR-16b, miR-1298-3p, miR-455-3p, miR-145b, miR-2284r, miR-541, miR-877-3p, miR-361-3p, miR-423-5p, miR-2447, miR-3956-3p, miR-190b-5p, miR-2284j, miR-615, miR-499a-3p, miR-378g, miR-24-1-5p, miR-2284g, miR-126b-5p, miR-504, miR-136-5p, miR-409-5p, miR-378j, miR-2285i, miR-2285w, miR-345-3p, miR-210-5p, miR-500a-5p, miR-1247-5p, miR-2284h-5p, miR-18a-3p, miR-106a, miR-30d-3p, miR-212-5p, miR-33b-3p, miR-2284u, miR-193b-5p, miR-769-5p, miR-224-5p, miR-3184-5p, miR-181c-5p, miR-129-2-3p, miR-190a-5p, miR-4492, miR-874-5p, miR-130b-5p, miR-30e-3p, miR-30a-3p, miR-10a, miR-499b-3p, miR-2284s, miR-15b-5p, miR-2331-3p, miR-504-5p, miR-30c-1-3p, miR-552-3p, miR-339b, miR-1895, miR-543-3p, miR-654-3p, miR-130b-5p, miR-382, miR-1343-5p, miR-224-5p, miR-190a, miR-106a-5p, miR-455-5p, miR-17-5p, miR-432-5p, miR-544b, miR-20b, miR-2355-3p, miR-138, miR-30b-3p, miR-2284ab, miR-219a-1-3p, miR-1260b, miR-455-5p, miR-653, miR-1985, miR-181a-5p, miR-1434-3p, miR-145a-5p, miR-194-5p, miR-

miR-665-5p, miR-214, miR-145a-3p, miR-4510, miR-6134, miR-3184-5p, miR-346, novel\_44, miR-6525, miR-10b-5p, miR-664a-5p, miR-320e, miR-324-3p, miR-130b-5p, miR-4492, miR-874-5p, miR-664a, miR-182-5p, miR-21-3p, miR-3065-3p, miR-30c-1-3p, miR-504-5p, miR-22-3p, miR-6130, miR-323-5p, miR-139-5p, miR-10a, miR-377-3p, miR-625-5p, miR-345-5p, miR-339b, miR-345-3p, miR-486-3p, miR-2411, miR-181b-1-3p, miR-130a-5p, miR-185-3p, miR-500a-5p, miR-324-3p, novel\_17, miR-299-3p, miR-30b-3p, miR-34b-5p, miR-760-3p, miR-466i-5p, miR-320d, miR-3960, miR-18a-3p, miR-328-3p, miR-1247-5p, miR-5703, miR-2904, miR-2300b-3p, miR-2366, miR-34a-5p, miR-378d, miR-148a-5p, miR-133a-3p, miR-16-1-3p, miR-4429, miR-3956-3p, miR-541-3p, novel\_60, miR-423-5p, novel\_111, miR-301a-5p, miR-2440, miR-218-5p, miR-490-5p, miR-3968, miR-664b, miR-4792, miR-3064-5p, miR-139-5p, miR-4443, miR-499a-3p, miR-378g, miR-361-3p, miR-1983, miR-877-3p, miR-504, miR-193a, miR-4532, miR-8485, miR-30c-1-3p, miR-182-5p, miR-1306-5p, miR-5126, miR-320b, miR-214-3p, miR-491-5p, miR-3085-3p, miR-181b-2-3p, miR-2300a-5p, novel\_4, miR-455-3p, miR-9788-3p, miR-148b-5p, miR-147a, miR-30b-3p, miR-10b, miR-541, miR-301b-5p, miR-2284r, miR-296-5p, miR-21b, novel\_42, miR-331-3p, miR-100-3p, miR-6740-5p, miR-2433, miR-486b-3p, miR-370-3p, miR-874-3p, miR-574-5p, miR-34c-5p, miR-320a, miR-3154, miR-671-5p, miR-485-5p, miR-7144-5p, miR-345-5p, novel\_91, miR-4286, miR-3064-5p, miR-3529-3p, miR-1271-3p, miR-3065-3p, novel\_39, miR-148b-5p, miR-181c-3p, miR-339a, miR-30c-2-3p, miR-664-3p, miR-125a-3p, novel\_127, miR-543-5p, novel\_96, novel\_79, miR-299a-3p, miR-2411-5p, miR-505-5p, miR-10a-5p, miR-2428, miR-449a, miR-24-3p, miR-33a-3p, miR-34c, miR-576-3p, miR-147-5p, miR-656-5p, miR-10a-5p, miR-320b, miR-378b, novel\_68, miR-181b-3p, miR-660, miR-320c, miR-181b-5p, miR-2284m, miR-21b, miR-181a-5p, miR-205-5p, miR-30c-2-3p, miR-500a-5p, miR-30c-1-3p, miR-2284n, miR-181c-5p, miR-30c-1-3p, miR-187-3p, miR-181d-5p

SLC22A18 ENSOARGO(solute c

ZNF277

ENSOARGO(zinc fin

miR-490-3p, miR-199a-5p, miR-2478, miR-4286, miR-29b-2-5p, miR-2385-3p, novel\_127, miR-181b-5p, miR-200c-3p, miR-17-3p, miR-450a-2-3p, miR-339a, miR-30f, miR-664-3p, miR-200c, miR-2285af, miR-214-5p, miR-758-5p, miR-2411-5p, miR-1271-5p, miR-505-5p, miR-322-5p, miR-302a-5p, novel\_79, miR-429-3p, miR-496, miR-200b-3p, miR-30a-5p, miR-218-2-3p, miR-1343-5p, miR-1290, miR-345-3p, miR-365a-5p, miR-323-3p, miR-3607-3p, miR-16-5p, miR-28-5p, miR-204-5p, miR-410-5p, miR-2433, miR-199a-5p, miR-3959-5p, miR-374c-3p, miR-1271, miR-598-3p, miR-2285aa, miR-503-3p, miR-485-5p, miR-1248, miR-345-5p, miR-329a, miR-10b-3p, miR-23b, miR-301, miR-424-3p, miR-30e-5p, miR-345-5p, miR-101-5p, miR-106b-3p, miR-1343-5p, miR-455-5p, miR-2411-3p, miR-365b-5p, miR-149-5p, miR-339-5p, miR-133b-5p, miR-455-5p, miR-497-5p, miR-26a-2-3p, miR-16b, miR-380-3p, miR-374b-3p, miR-145a-5p, miR-22-3p, miR-2113, miR-181a-5p, miR-19b-2-5p, miR-873a-5p, miR-199b-5p, miR-2428, miR-2284w, miR-211, miR-17-3p, novel\_101, miR-2285x, miR-3957-3p, miR-6123, miR-656-5p, miR-425-5p, miR-485-3p, miR-16a, miR-6402, miR-6529b, miR-502-5p, miR-15a, miR-6535, miR-374c-3p, novel\_68, miR-195a-5p, miR-1291, miR-18a-3p, miR-2387, miR-380-3p, miR-2411, miR-29b-1-5p, miR-345-3p, miR-345-3p, miR-185-3p, miR-500a-5p, novel\_17, miR-210-5p, miR-532-3p, miR-15a-5p, miR-200b, miR-23c, miR-7859, miR-23b-3p, miR-210-3p, miR-212-5p, miR-3600, miR-548e-3p, miR-18a-3p, miR-218-1-3p, miR-941, miR-184-3p, miR-1197-5p, miR-188-3p, miR-2904, miR-2408, miR-362-3p, miR-2366, miR-6134, miR-181c-5p, miR-3184-5p, miR-6525, miR-1271, miR-4510, miR-874-5p, miR-424-5p, miR-708-5p, miR-17-3p, miR-664a, miR-665, miR-29b-2-5p, miR-19b-1-5p, miR-15b-5p, novel\_25, miR-22-3p, miR-6130, miR-216b-5p, miR-2284s, novel\_107, miR-548o-3p, miR-496-3p, miR-543-3p, miR-625-5p, miR-339b, miR-345-5p, miR-30f, miR-

miR-224-5p, miR-197-5p, miR-660, miR-363-5p, miR-345-5p, miR-296-3p, miR-1434-3p, miR-653, miR-194-5p, miR-1260b, miR-138, miR-30b-3p, miR-744-5p, miR-133b-5p, miR-130a-3p, miR-432-5p, miR-203b-5p, miR-656-5p, novel\_120, miR-342-3p, miR-17-3p, miR-24-3p, miR-2428, novel\_27, miR-18a-3p, miR-9851-3p, miR-378b, miR-2404, miR-200c, miR-1260a, miR-200c-3p, miR-17-3p, miR-4286, miR-1, miR-2284a, miR-1957a, miR-3065-3p, miR-345-3p, miR-582-3p, miR-300, miR-496, let-7a-2-3p, miR-200b-3p, miR-128-3p, miR-7641, miR-378h, miR-24-2-5p, miR-214-5p, miR-582-3p, miR-135a-1-3p, miR-410-5p, miR-409-3p, miR-331-3p, miR-138-5p, miR-6128, miR-500b-5p, miR-378c, miR-503-3p, miR-381-3p, miR-488-3p, miR-362-5p, miR-3154, let-7g-3p, miR-671-5p, miR-141-3p, novel\_103, miR-1306-5p, miR-342, miR-2330-5p, miR-33a-5p, miR-652-5p, miR-296-5p, miR-484, miR-378b, miR-30b-3p, miR-3962, miR-7857, miR-378c, miR-3120-5p, miR-409b, novel\_4, miR-27a-3p, miR-500-5p, miR-9788-3p, miR-216a-3p, miR-107-5p, miR-371a-5p, miR-2285y, miR-3059-5p, miR-452-5p, miR-194b-5p, miR-362-5p, miR-8095, miR-361-3p, miR-129b-5p, novel\_94, miR-452-3p, miR-10b, miR-20a-3p, miR-7977, miR-541-5p, miR-3082-5p, miR-378e, miR-27a-3p, miR-185-3p, miR-760-3p, miR-221-5p, miR-30b-3p, miR-2300b-3p, novel\_133, miR-1193, miR-188-3p, miR-140-3p, miR-2904, miR-548e-3p, miR-1b-3p, miR-200b, miR-532-3p, miR-17-3p, miR-155-5p, miR-539-5p, miR-378c, miR-3074-2-3p, miR-206-3p, miR-21a-3p, let-7g-3p, miR-660-5p, miR-496-3p, miR-378a-3p, miR-140-5p, miR-221-5p, miR-3065-3p, miR-193b-3p, miR-139-5p, miR-155-5p, miR-204-3p, miR-296-3p, miR-7-5p, miR-2411-3p, novel\_51, miR-194a, miR-196b-5p, miR-378a-5p, miR-193a-3p, miR-106b-3p, miR-628-5p, miR-22841, let-7a-2-3p, miR-503-3p, miR-7b-5p, miR-432, miR-3432b, miR-16-1-3p, miR-27b-3p, miR-31-5p, miR-194-3p, miR-149-5p, miR-411-5p, miR-576-



miR-2320-3p, miR-216a-3p, miR-9788-3p, miR-10b-1, novel\_4, miR-409b, miR-27a-3p, miR-378c, miR-544a, miR-3120-5p, miR-484, miR-378b, miR-6529a, miR-296-5p, miR-412-3p, miR-30b-3p, miR-30c-1-3p, miR-3187-3p, miR-2330-5p, miR-424-5p, miR-106a-5p, miR-25-5p, miR-5126, miR-326, miR-378e, miR-489, miR-3082-5p, miR-27a-3p, miR-541-5p, novel\_94, miR-361-3p, miR-8095, novel\_60, miR-541-3p, miR-1296-5p, miR-181d-5p, miR-2284q, miR-2285y, miR-15a-5p, miR-532-3p, miR-3960, miR-3600, miR-378d, novel\_133, miR-1246, miR-2904, miR-5703, miR-125b-2-3p, miR-20a, miR-106a, miR-760-3p, miR-221-5p, miR-34b-5p, miR-30b-3p, miR-299-3p, miR-185-3p, miR-6130, miR-193b-3p, novel\_25, miR-204-3p, miR-22-3p, miR-877-5p, miR-221-5p, miR-140-5p, miR-378a-3p, miR-3065-3p, miR-206-3p, miR-6134, miR-378c, miR-145a-3p, miR-4510, miR-17-3p, miR-664a, miR-424-5p, miR-185-5p, miR-544b, miR-20b, miR-30b-3p, miR-138, miR-1260b, miR-455-5p, miR-181a-5p, miR-345-5p, miR-124-5p, miR-1343-5p, miR-224-5p, miR-455-5p, miR-106a-5p, miR-17-5p, miR-146b-3p, miR-34b, miR-1291, miR-195a-5p, miR-18a-3p, miR-371b-3p, miR-24-3p, miR-449a, novel\_27, miR-326-3p, novel\_101, miR-17-3p, miR-502b, miR-15a, miR-20a-5p, miR-6529b, miR-34c, miR-16a, miR-33a-3p, miR-483-3p, miR-378h, miR-545-5p, miR-105-2, miR-615-3p, miR-380-5p, miR-3065-3p, miR-2284a, miR-1, miR-30a-3p, miR-181a-2-3p, miR-2898, miR-450a-2-3p, miR-17-3p, miR-181b-5p, miR-1260a, miR-2285af, miR-30c-2-3p, miR-34c-5p, miR-365a-3p, miR-485-5p, miR-1814c, miR-2448-3p, miR-3154, miR-17-5p, miR-93, miR-145-3p, miR-378c, miR-6128, miR-103b, miR-138-5p, miR-486b-3p, miR-2332, miR-126a-5p, miR-421, miR-1343-3p, miR-2284r, miR-541, miR-1a-3p, miR-378d, miR-2310, miR-127-3p, miR-106b-5p, miR-16b, miR-3596, miR-378g, miR-203-3p, miR-652-3p, miR-4443, miR-2284a, miR-1792, miR-2310b, miR-126b-

miR-203-3p, miR-454-5p, miR-7857-3p, miR-25, miR-378g, miR-378e, miR-499b-5p, miR-7689-3p, miR-7977, miR-664b, miR-4792, miR-452-3p, miR-1983, novel\_94, miR-504, miR-136-5p, miR-361-3p, miR-140-5p, miR-219a-2-3p, novel\_111, miR-2285f, miR-2447, miR-4454, miR-541-3p, miR-212-3p, miR-2285t, miR-154-3p, miR-2284q, miR-4726-5p, novel\_82, miR-615, miR-421, miR-425-3p, novel\_4, miR-1343-3p, miR-409b, miR-3120-5p, miR-378c, miR-323b, miR-30b-3p, miR-125b-2-3p, miR-758-3p, miR-378b, miR-2284r, miR-541, miR-143-5p, miR-193a, miR-758-3p, miR-30c-1-3p, miR-378d, miR-23a-3p, miR-376b, miR-1388-3p, miR-424-5p, miR-381-5p, miR-491-5p, miR-487b-5p, miR-323b-3p, miR-29b-1-5p, miR-16b, miR-326, miR-204-3p, miR-22-3p, miR-155-5p, miR-877-5p, miR-15b-5p, miR-377-3p, miR-2284s, miR-6130, miR-216b-3p, miR-154a-3p, miR-30c-1-3p, miR-378a-3p, miR-504-5p, miR-660-5p, miR-548o-3p, miR-1827, miR-2312, miR-345-5p, miR-154b-3p, miR-299, miR-122-5p, miR-6525, miR-378c, miR-145a-3p, miR-4510, miR-3184-3p, miR-129-2-3p, miR-487a-5p, miR-4492, miR-129-5p, miR-424-5p, miR-155-5p, miR-487b-5p, miR-451a, miR-219b-3p, miR-338-5p, miR-2285j, miR-487a-3p, miR-23b-3p, miR-383-5p, miR-15a-5p, miR-23c, miR-485-3p, miR-16-1-3p, miR-218-1-3p, miR-33b-3p, miR-2904, miR-378a-3p, miR-1197-5p, novel\_133, miR-378i, miR-193b-5p, miR-2366, miR-2300b-3p, miR-486-3p, miR-143-3p, miR-29b-1-5p, miR-376a-5p, miR-377-5p, miR-345-3p, miR-216c-5p, miR-487a, miR-21-3p, miR-216a-5p, miR-324-3p, miR-125b, miR-185-3p, miR-422a, miR-92a-1-5p, miR-345-3p, miR-669, miR-2404, miR-670-3p, miR-378f, miR-195a-5p, miR-107, miR-412-3p, miR-2285ab, miR-326-3p, miR-24-3p, novel\_101, miR-135a-2-3p, miR-22-5p, miR-16a, miR-15a, miR-194-3p, miR-2355-3p, miR-103, miR-134-3p, miR-26b-3p, miR-377-5p, miR-103a-3p, miR-133b-5p, miR-497-5p, miR-30b-3p, miR-138, miR-16b, miR-16-1-3p, miR-381-3p, miR-376c-5p, miR-30d-5p, miR-30e-5p, miR-21a-3p, miR-376c-5p, miR-1248, miR-329a, miR-30f, miR-32-3p, novel\_25, miR-6130, miR-665-5p, miR-1306-5p, miR-4510, miR-365a-5p, miR-6525, miR-7134-5p, miR-30a-5p, miR-345-3p, miR-30c-5p, miR-362-3p, miR-2300b-3p, miR-24-2-5p, miR-345-3p, miR-30b, miR-30d, novel\_96, miR-490-3p, miR-143-3p, miR-3065-5p, miR-376b-5p, miR-2285ab, miR-140-5p, miR-299b-5p, miR-3120-3p, miR-411b-3p, miR-30b-5p, miR-203b-5p, miR-147-5p, miR-4726-5p, miR-2285f, novel\_101, miR-32-3p, miR-2428, miR-197-3p, miR-708-3p, miR-329-3p, miR-7862, miR-362-3p, miR-299a-5p, miR-219a-1-3p, miR-665, miR-487b-3p, miR-330-3p, miR-9788-3p, miR-185-5p, miR-365b-5p, miR-330-3p, miR-362-3p, miR-2411-3p, miR-466f-3p, miR-491-5p, miR-574-3p, miR-6240, miR-8485, miR-193a, miR-432-3p

CLEC4G ENSOARGO(C-type 1) miR-203-3p, miR-29a-3p, miR-431, miR-1343-3p, miR-3074-5p, miR-3064-5p, miR-4792, miR-363, miR-1843b-5p, miR-6134, miR-29c-3p, miR-3064-5p, miR-3074-5p, miR-29a, miR-3085-3p, miR-6402, miR-431-5p

EPG5 ENSOARGO(ectopic) miR-203-3p, miR-29a-3p, miR-431, miR-1343-3p, miR-3074-5p, miR-3064-5p, miR-4792, miR-363, miR-1843b-5p, miR-6134, miR-29c-3p, miR-3064-5p, miR-3074-5p, miR-29a, miR-3085-3p, miR-6402, miR-431-5p

SPTLC2 ENSOARGO(serine p) miR-203-3p, miR-29a-3p, miR-431, miR-1343-3p, miR-3074-5p, miR-3064-5p, miR-4792, miR-363, miR-1843b-5p, miR-6134, miR-29c-3p, miR-3064-5p, miR-3074-5p, miR-29a, miR-3085-3p, miR-6402, miR-431-5p

|         |                   |                                                                                                                                                                                                                                                                                                                                                                                                                                                                                                                                                                                                                                                                                                                                                                                                                                                                                                                                                                                                                                                                                                                                                                                                                                                                                                                                                                                                                                                                                                                                                                                                                                                                                                                                                                                                                                                                                                                                                                                                                                                                                                                      |
|---------|-------------------|----------------------------------------------------------------------------------------------------------------------------------------------------------------------------------------------------------------------------------------------------------------------------------------------------------------------------------------------------------------------------------------------------------------------------------------------------------------------------------------------------------------------------------------------------------------------------------------------------------------------------------------------------------------------------------------------------------------------------------------------------------------------------------------------------------------------------------------------------------------------------------------------------------------------------------------------------------------------------------------------------------------------------------------------------------------------------------------------------------------------------------------------------------------------------------------------------------------------------------------------------------------------------------------------------------------------------------------------------------------------------------------------------------------------------------------------------------------------------------------------------------------------------------------------------------------------------------------------------------------------------------------------------------------------------------------------------------------------------------------------------------------------------------------------------------------------------------------------------------------------------------------------------------------------------------------------------------------------------------------------------------------------------------------------------------------------------------------------------------------------|
| MYO3B   | ENSOARGO(myosin I | <p>miR-16a, miR-15a, miR-424-5p, miR-487b-5p, miR-16-5p, miR-3059-5p, miR-7705, miR-326-3p, miR-1827, miR-195a-5p, miR-107, let-7g-3p, miR-552-3p, miR-499b-5p, miR-15b-5p, novel_32, miR-670-3p, miR-489, miR-378g, miR-499a-3p, miR-499b-3p, miR-16b, miR-125a-3p, miR-326, miR-381-5p, miR-107, miR-378a-5p, miR-363-5p, let-7c-3p, miR-2330-5p, miR-424-5p, miR-30b-3p, miR-330-5p, miR-1285, miR-542-3p, miR-497-5p, miR-450b-5p, miR-381-5p, miR-16b, miR-30b-3p, miR-103a-3p, miR-1343-3p, miR-421, miR-103, miR-582-3p, miR-134-3p, miR-3431, miR-15a-5p, miR-322-5p</p> <p>miR-30f, miR-30e-5p, miR-2285c, miR-411, miR-30d-5p, miR-2284n, miR-30c-1-3p, miR-221-5p, miR-141-3p, miR-1271, miR-532-5p, miR-615-5p, miR-129-5p, miR-874-5p, miR-486b-3p, miR-2284k, miR-222-3p, miR-3184-5p, miR-6134, miR-181c-5p, miR-1306-5p, miR-2284v, miR-145a-3p, miR-411-3p, miR-30c, miR-3591-5p, miR-30c-5p, miR-1246, miR-30a-5p, miR-302a-5p, miR-483-3p, miR-2284z, novel_121, miR-222, miR-2284m, miR-760-3p, miR-466i-5p, miR-181b-5p, miR-221-5p, miR-30d, miR-200a-3p, miR-30b, miR-2285p, novel_17, miR-6119-5p, miR-324-3p, miR-30c-2-3p, miR-185-3p, miR-130a-5p, miR-486-3p, miR-192-3p, miR-1271-3p, miR-3064-5p, miR-221, miR-129b-5p, miR-27a-3p, miR-3064-5p, miR-499a-5p, miR-379-3p, miR-502-5p, miR-30b-5p, miR-4324, miR-33a-3p, miR-423-5p, novel_60, miR-3059-5p, miR-3956-3p, miR-3957-3p, novel_101, miR-495-3p, miR-2284j, miR-181d-5p, miR-2284ab, miR-101a-5p, miR-2284aa, miR-2284x, miR-27b-3p, miR-708-3p, miR-296-5p, miR-143-5p, miR-181a-5p, miR-125b-2-3p, miR-2285g, miR-185-5p, novel_116, miR-221-3p, miR-2285e, miR-1343-3p, miR-26b-3p, miR-27a-3p, miR-3085-3p, miR-483-3p, novel_103, let-7d-3p, novel_51, miR-30c-1-3p, miR-382-3p, miR-628-5p</p> <p>miR-4443, miR-532-3p, miR-377-3p, miR-145b, miR-615-5p, miR-105-1, miR-2889, miR-877-3p, miR-105-2, miR-4508, miR-329a, miR-1260b, miR-362-3p, miR-145a-5p, miR-362-3p, miR-329-3p, novel_39, miR-1260b, miR-342-3p, miR-21-3p, miR-760-3p, miR-362-3p, miR-105-5p, miR-371a-5p, miR-377-3p, miR-1260a, miR-342</p> |
| ATRN    | ENSOARGO(attracti |                                                                                                                                                                                                                                                                                                                                                                                                                                                                                                                                                                                                                                                                                                                                                                                                                                                                                                                                                                                                                                                                                                                                                                                                                                                                                                                                                                                                                                                                                                                                                                                                                                                                                                                                                                                                                                                                                                                                                                                                                                                                                                                      |
| PIK3C2B | ENSOARGO(phosphat |                                                                                                                                                                                                                                                                                                                                                                                                                                                                                                                                                                                                                                                                                                                                                                                                                                                                                                                                                                                                                                                                                                                                                                                                                                                                                                                                                                                                                                                                                                                                                                                                                                                                                                                                                                                                                                                                                                                                                                                                                                                                                                                      |
| MAP4    | ENSOARGO(microtub |                                                                                                                                                                                                                                                                                                                                                                                                                                                                                                                                                                                                                                                                                                                                                                                                                                                                                                                                                                                                                                                                                                                                                                                                                                                                                                                                                                                                                                                                                                                                                                                                                                                                                                                                                                                                                                                                                                                                                                                                                                                                                                                      |

miR-2300a-5p, miR-330-3p, miR-181b-2-3p, miR-145b, miR-27a-3p, miR-147a, miR-1298-3p, miR-153, miR-2459, miR-216a-3p, miR-9788-3p, miR-455-3p, miR-4791, miR-484, miR-378b, miR-30b-3p, miR-412-3p, miR-2426, miR-450b-5p, miR-544a, miR-378c, miR-1388-5p, miR-1839-5p, miR-1839-3p, miR-382-3p, let-7a-5p, miR-1388-3p, miR-376b, miR-30c-1-3p, miR-378d, miR-3187-3p, miR-193a, miR-1306-5p, miR-326, miR-199a-3p, miR-3085-3p, novel\_124, miR-491-5p, let-7e, miR-153-3p, miR-2319b, miR-452-3p, miR-3064-5p, miR-7977, miR-211-5p, miR-489, miR-7857-3p, miR-378e, miR-27a-3p, let-7d-5p, miR-1983, miR-493-5p, miR-3956-3p, novel\_60, miR-2447, miR-190b-5p, miR-452-5p, miR-2285f, novel\_111, miR-423-5p, miR-2440, miR-4726-5p, miR-2284q, miR-2285t, miR-3960, miR-200b, miR-328-3p, miR-199a-3p, miR-2284h-5p, miR-1961, miR-2300b-3p, miR-378i, miR-378a-3p, miR-5703, miR-2904, miR-34a-5p, miR-664-5p, miR-2285w, miR-503-5p, miR-183-5p, miR-345-3p, miR-181b-1-3p, miR-125b-2-3p, miR-486-3p, miR-422a, miR-185-3p, miR-219b-5p, miR-98-5p, miR-760-3p, miR-466i-5p, let-7k, miR-34b-5p, miR-3653-3p, miR-30b-3p, miR-378a-3p, miR-30c-1-3p, miR-3065-3p, miR-6130, miR-6516, miR-544-3p, miR-377-3p, let-7i-5p, miR-204-3p, miR-129b-3p, miR-18a-5p, miR-2312, miR-1827, miR-4510, miR-378c, let-7b, miR-2330-3p, miR-665-5p, miR-6525, miR-6134, miR-338-3p, miR-122-5p, miR-3184-5p, let-7b-5p, miR-30e-3p, let-7f, miR-30a-3p, miR-487a-5p, miR-190a-5p, miR-874-5p, miR-187-3p, miR-3955-5p, miR-665, let-7g-5p, miR-503-5p, miR-3431, miR-3535, miR-544b, miR-149-5p, novel\_116, miR-1434-3p, miR-145a-5p, miR-30b-3p, miR-29b, miR-455-5p, miR-27b-3p, miR-188-5p, miR-2889, miR-493-5p, miR-6240, miR-668-3p, miR-377-3p, miR-503-5p, novel\_51, miR-455-5p, miR-190a, miR-330-3p, miR-365b-5p, miR-483-3p, miR-452-5p, miR-378b, novel\_68, miR-411b-3p, novel\_69, miR-29a-3p, miR-

miR-200a-5p, miR-102-5p, miR-110b-5p, miR-90c, miR-200b-5p, miR-196a-5p, miR-1290, miR-134-5p, miR-450a-1-3p, miR-486-5p, miR-129-1-3p, novel\_121, novel\_79, miR-2285ad, miR-429-3p, miR-6517, miR-592, miR-134-5p, miR-6740-5p, miR-1260b, let-7e-3p, miR-30e-5p, miR-223-5p, miR-133c, miR-2355-5p, miR-2285aa, miR-1271, miR-483-3p, miR-196b-5p, miR-105-5p, miR-194a, miR-377-3p, let-7a-2-3p, miR-2285r, miR-380-5p, miR-6240, miR-27b-3p, miR-3432b, miR-450c-3p, novel\_23, miR-339-5p, miR-29a, novel\_87, miR-4324, miR-142b, miR-199b-5p, miR-29c-3p, miR-378f, miR-3065-5p, miR-216a-3p, miR-148a-3p, miR-6535, miR-3120-3p, miR-26b-5p, miR-329-5p, miR-216b-3p, miR-500a-5p, miR-3601, miR-324-3p, miR-422a, miR-30b, novel\_17, miR-618, miR-26a-5p, miR-380-3p, miR-664b-3p, miR-345-3p, miR-329a-5p, miR-487a, miR-664-5p, miR-218-1-3p, miR-33b-3p, miR-378a-3p, miR-217-5p, miR-378i, miR-30c-5p, miR-2366, miR-7859, miR-30d-3p, miR-4492, miR-500, miR-129-5p, miR-151-3p, miR-30a-3p, miR-3604, miR-665, miR-2285j, miR-15b-3p, miR-30e-3p, miR-346, miR-129-2-3p, miR-625-5p, miR-1827, miR-339b, miR-500a-3p, miR-30d-5p, miR-2285c, miR-450a-1-3p, miR-377-3p, miR-499b-3p, miR-216b-3p, miR-154a-3p, miR-30c-1-3p, miR-504-5p, miR-199b-5p, miR-29b-1-5p, miR-8485, miR-378d, miR-1388-3p, miR-574-3p, miR-1839-5p, miR-455-3p, miR-425-3p, miR-147a, miR-539-5p, novel\_78, miR-548w, miR-330-3p, miR-490-5p, miR-154-3p, miR-499a-5p, novel\_82, miR-493-5p, miR-299b-5p, miR-136-5p, miR-504, miR-140-5p, miR-221, miR-499a-3p, miR-2285u, miR-211-5p, miR-2319b, miR-17-3p, miR-200c-3p, miR-181b-5p, miR-30c-2-3p, miR-217, miR-339a, miR-1260a, miR-200c, miR-199a-5p, miR-490-3p, miR-30a-3p, miR-29b-2-5p, miR-2403, miR-4286, miR-181a-2-3p, miR-200b-3p, miR-105-2, miR-128-3p, let-7a-2-3p, miR-582-3p, miR-29d-3p, miR-30a-5p, miR-134, miR-582-3p, miR-545-5p, miR-214-

PPP1R9A ENSOARGO protein

let-7a-5p, miR-574-3p, miR-494-3p, miR-4532, miR-378d, miR-320b, novel\_103, miR-1306-5p, miR-326, let-7e, miR-214-3p, miR-103a-2-5p, miR-3085-3p, miR-130b-3p, miR-145b, miR-1343-3p, novel\_4, miR-330-3p, miR-216a-3p, miR-1185-3p, miR-147a, miR-1298-3p, miR-7857, miR-30b-3p, miR-125b-2-3p, miR-2284r, miR-296-5p, miR-378b, miR-484, miR-541, miR-10b, miR-378c, miR-450b-5p, miR-101a-5p, miR-2285f, miR-181d-5p, miR-541-3p, miR-423-5p, miR-877-3p, miR-2285y, miR-107-5p, miR-2285n, miR-218-5p, miR-615, miR-4726-5p, miR-335, miR-541-5p, miR-2285u, miR-7977, miR-3064-5p, miR-24-1-5p, miR-452-3p, let-7d-5p, miR-1185-2-3p, miR-4443, miR-378e, miR-489, miR-493-5p, miR-181a-3p, miR-96-5p, miR-219b-5p, miR-324-3p, miR-185-3p, miR-422a, miR-26a-5p, miR-30b-3p, miR-221-5p, let-7k, miR-320d, miR-98-5p, miR-466i-5p, miR-212-5p, miR-3960, miR-532-3p, novel\_83, miR-328-3p, miR-148b-3p, miR-378a-3p, novel\_133, miR-378i, miR-2300b-3p, miR-1961, miR-133a-3p, miR-378d, miR-4429, miR-941, miR-19b-3p, miR-33b-3p, miR-1271, miR-214, miR-2330-3p, miR-665-5p, miR-378c, let-7b, miR-129-2-3p, miR-145a-3p, miR-3184-3p, miR-3074-5p, miR-4510, miR-3184-5p, let-7b-5p, miR-338-3p, miR-6134, miR-10b-5p, miR-346, miR-324-3p, miR-19b-1-5p, miR-320e, let-7f, miR-4492, miR-208b-5p, miR-454-3p, novel\_74, miR-21-3p, miR-552-3p, miR-378a-3p, miR-221-5p, let-7i-5p, miR-10a, miR-377-3p, miR-301a-3p, miR-6516, miR-6130, miR-129b-3p, miR-133b-3p, let-7g-3p, miR-2312, miR-339b, miR-101-5p, miR-363-5p, let-7f-2-3p, let-7f-2-3p, miR-628-5p, miR-6240, miR-493-5p, miR-2285r, miR-330-3p, miR-105-5p, miR-2285v, miR-7-5p, miR-377-3p, miR-339-5p, miR-130a-3p, miR-31-5p, miR-3955-5p, miR-149-5p, miR-194-3p, miR-3431, let-7g-5p, miR-145a-5p, miR-19b-2-5p, miR-2113, miR-7b-5p, miR-4508, miR-2284x, miR-30b-3p, miR-125b-1-3p, miR-3957-3p, novel\_120, miR-335-5p, miR-326-3p, miR-877-3p, miR-154a, miR-105-3p, miR-539-5p, miR-130b-5p, let-7f-2-3p, let-7f-2-3p, miR-483-3p, miR-103a-2-5p, miR-130b-5p, miR-153-3p, miR-221-5p, miR-218-5p, miR-182-5p, miR-107-5p, miR-323-5p, miR-483-3p, miR-153, miR-323a-5p, miR-1185-3p, miR-1185-2-3p, miR-221-5p, miR-655-5p, novel\_99, miR-1827, novel\_94, miR-2319a, miR-433-3p

C16orf70 ENSOARGO(chromosome)

VEPH1 ENSOARGO(ventricu

miR-182-5p, miR-16b, miR-323b-3p, miR-199b-5p, miR-127-3p, miR-124a, miR-1b-5p, miR-8485, miR-378d, miR-758-3p, miR-501-3p, miR-323b, miR-301b-5p, miR-2284r, miR-329-3p, miR-362-3p, miR-181b-2-3p, miR-145b, miR-1343-3p, miR-199b-3p, novel\_78, miR-330-3p, miR-2459, miR-148b-5p, miR-1298-3p, miR-496-5p, miR-301a-5p, miR-218-5p, miR-2284j, miR-2447, miR-361-3p, miR-211-5p, miR-2285u, miR-7689-3p, miR-24-1-5p, miR-4443, miR-500-3p, miR-25, miR-3596, miR-499a-3p, miR-378g, miR-345-3p, miR-422a, miR-92a-1-5p, miR-324-3p, miR-210-5p, miR-30b, let-7k, miR-98-5p, miR-345-3p, miR-503-5p, miR-10a-3p, miR-486-3p, miR-181b-1-3p, miR-421-5p, miR-376a-5p, miR-378a-3p, miR-1434-5p, miR-193b-5p, miR-1961, miR-378i, miR-30c-5p, miR-148a-5p, miR-34a-5p, miR-133a-3p, miR-218-1-3p, miR-212-5p, miR-18a-3p, miR-665, let-7f, miR-130b-5p, miR-500, miR-4492, miR-129-2-3p, let-7b, miR-346, miR-224-5p, miR-6525, miR-30d-5p, miR-500a-3p, miR-450a-1-3p, miR-1827, miR-625-5p, miR-885-3p, miR-1895, miR-296-3p, miR-548o-3p, miR-30c-1-3p, miR-2331-3p, miR-15b-5p, let-7i-5p, miR-216b-5p, miR-377-3p, miR-2284s, miR-499b-3p, miR-194a, miR-2411-3p, novel\_51, miR-582, miR-377-3p, miR-193a-3p, miR-483-3p, miR-6240, miR-2285r, novel\_23, miR-450c-3p, miR-708-3p, miR-2284x, miR-27b-3p, miR-497-5p, miR-4508, miR-16b, miR-340-3p, miR-149-5p, miR-134-3p, miR-576-3p, miR-6123, miR-421-5p, miR-29a, miR-6119-3p, miR-29c-3p, miR-193b-3p, miR-199b-5p, miR-3065-5p, miR-148a-3p, let-7e-5p, miR-378f, miR-3120-3p, novel\_68, miR-181b-3p, miR-677, miR-299b-3p, miR-30f, miR-152-3p, novel\_127, let-7f-5p, miR-28-3p, miR-3064-5p, novel\_39, miR-200a, let-7g, miR-2284y, miR-148b-5p, miR-330-5p, miR-23b-5p, miR-1343-5p, miR-30c, miR-885-3p, miR-412, miR-299a-3p, miR-2285ad, miR-129-1-3p, miR-2284z, miR-450a-1-3p, miR-322-5p, miR-505-5p, miR-100-3p, miR-125b-

miR-29b-1-5p, miR-130a-5p, miR-329a-5p, miR-30d, miR-299-3p, miR-30b, miR-196a-3p, miR-26a-5p, miR-2285p, miR-7859, miR-23b-3p, miR-23c, miR-200b, miR-222-5p, miR-212-5p, miR-548e-3p, miR-16-1-3p, miR-218-1-3p, let-7a-3p, miR-148a-5p, miR-5703, miR-188-3p, miR-1193, miR-217-5p, miR-30c-5p, miR-142a-5p, miR-539-5p, miR-190a-5p, miR-708-5p, novel\_74, miR-6516-3p, miR-151-3p, miR-664a-5p, miR-15b-3p, novel\_25, miR-544-3p, miR-27a-5p, miR-2331-3p, miR-548o-3p, miR-582-5p, miR-2312, let-7g-3p, miR-30f, miR-30d-5p, miR-2285c, miR-8485, miR-23a-3p, let-7c-3p, miR-652-5p, miR-2284b, miR-101b-3p, miR-494-3p, miR-487b-5p, miR-29b-1-5p, miR-326, miR-148b-5p, miR-2459, miR-1185-3p, miR-2285e, miR-421, miR-142-5p, miR-409b, miR-105-1, miR-1343-3p, miR-151a-3p, miR-101c, miR-2426, miR-544a, miR-8095, miR-2285f, miR-9-5p, miR-190b-5p, miR-3059-5p, miR-212-3p, miR-30b-5p, miR-101-3p, miR-203-3p, miR-454-5p, miR-1185-2-3p, miR-3596, miR-7857-3p, miR-2483-3p, miR-499b-5p, miR-541-5p, miR-126b-5p, miR-2284g, miR-452-3p, miR-20a-3p, miR-3963, miR-129b-5p, miR-200a, miR-2284y, miR-2284a, miR-28b, miR-181a-2-3p, miR-200a-3p, miR-200c-3p, miR-30f, miR-217, miR-200c, novel\_121, miR-9-5p, miR-376a-5p, miR-222, miR-299a-3p, miR-6517, miR-429-3p, miR-105-2, miR-30c, miR-200b-3p, miR-582-3p, miR-330-5p, miR-30a-5p, miR-3607-3p, miR-28-5p, miR-135a-5p, miR-34c-3p, miR-133c, miR-365a-3p, miR-2285aa, miR-141-3p, miR-3068-3p, miR-7144-5p, novel\_48, miR-485-5p, miR-10b-3p, miR-23b, miR-30e-5p, miR-628-5p, miR-466f-3p, miR-105-5p, miR-190a, miR-197-5p, miR-6238, miR-544b, miR-2285g, miR-133b-5p, miR-4508, miR-16-1-3p, miR-374b-3p, miR-326-3p, miR-495-3p, miR-147-5p, miR-28c, miR-576-3p, miR-299b-3p, miR-655-5p, miR-26b-5p, miR-329-5p, miR-376a-2-5p, miR-135b-5p, miR-2285ab

PANK3 ENSOARGO( pantothe: miR-424-5p, miR-30a-3p, miR-29b-2-5p, miR-29b-1-5p, miR-377-3p, miR-16b, miR-182-5p, miR-29b-1-5p, novel\_127, miR-466f-3p, miR-1343-5p, miR-18a-3p, miR-30d-3p, miR-26b-3p, miR-15a-5p, miR-322-5p, miR-545-5p, miR-1343-5p, miR-16b, miR-188-5p, miR-133a-3p, miR-497-5p, miR-16-5p, miR-6527, miR-30e-3p, miR-15a, miR-29b-2-5p, miR-16a, miR-30a-3p, miR-424-5p, miR-378b, miR-182-5p, miR-323-5p, miR-323a-5p, miR-377-3p, miR-454-5p, miR-15b-5p, miR-18a-3p, miR-10b-3p, miR-195a-5p

STX8 ENSOARGO( syntaxin 5p



miR-148b-5p, miR-216a-3p, miR-455-3p, miR-147a, miR-27a-3p, novel\_78, miR-105-1, miR-548w, miR-101c, miR-1388-5p, miR-450b-5p, miR-412-3p, miR-193a, miR-3187-3p, miR-30c-1-3p, miR-23a-3p, miR-424-5p, miR-491-5p, miR-3085-3p, miR-3955-3p, miR-16b, miR-326, miR-4443, miR-27a-3p, miR-378g, miR-7689-3p, miR-499b-5p, miR-211-5p, miR-3064-5p, miR-24-1-5p, miR-2319b, miR-452-3p, miR-20a-3p, miR-361-3p, miR-361-3p, miR-877-3p, miR-2285f, miR-3059-5p, miR-2447, miR-885-5p, miR-2285t, miR-490-5p, miR-3968, miR-450a-5p, novel\_82, miR-671-3p, miR-487a-3p, miR-23b-3p, miR-23c, miR-15a-5p, miR-485-3p, miR-30d-3p, miR-505-3p, miR-133a-3p, miR-148a-5p, miR-33b-3p, miR-1197-5p, miR-140-3p, miR-376a-5p, miR-215-5p, miR-2411, miR-2424, miR-2432, miR-376a-5p, miR-345-3p, miR-216c-5p, miR-221-5p, miR-466i-5p, miR-760-3p, miR-185-3p, miR-204-3p, miR-15b-5p, miR-6516, miR-192-5p, miR-323-5p, miR-545-3p, miR-30c-1-3p, miR-221-5p, miR-496-3p, miR-885-3p, miR-345-5p, miR-598-3p, miR-6134, miR-6525, miR-224-5p, miR-3074-2-3p, miR-539-5p, miR-129-2-3p, miR-424-5p, miR-4492, miR-30a-3p, miR-324-3p, miR-29b-2-5p, miR-665, miR-30e-3p, miR-149-5p, miR-194-3p, miR-432-5p, miR-3431, miR-134-3p, miR-31-5p, miR-497-5p, miR-27b-3p, miR-455-5p, miR-188-5p, miR-16b, miR-1260b, miR-197-3p, miR-708-3p, miR-432, miR-1285, miR-1434-3p, miR-2113, miR-345-5p, miR-2285r, miR-654-3p, miR-483-3p, miR-378a-5p, miR-2285l, miR-105-5p, miR-455-5p, miR-224-5p, miR-669, miR-6535, miR-2404, miR-323a-5p, miR-320b, miR-378b, miR-505-3p, miR-195a-5p, miR-379-5p, miR-135b-5p, miR-1291, miR-450b-3p, miR-3065-5p, miR-2285ab, miR-326-3p, miR-2428, miR-211, miR-371b-3p, miR-1839-3p, novel\_101, miR-495-3p, novel\_120, miR-656-5p, miR-625-3p, miR-147-5p, miR-128-1-5p, miR-16a, miR-1247-3p, miR-15a, miR-6402, novel\_121, miR-129-1-3p, miR-505-5p, miR-322-5p, miR-483-3p, miR-6516-

miR-6119-5p, miR-664-3p, miR-200c, miR-2285af, miR-200c-3p, miR-1a-2-5p, miR-127-5p, miR-107, miR-450b-5p, miR-3065-3p, miR-29d-3p, miR-496, miR-200b-3p, miR-429-3p, novel\_121, miR-2332, miR-370-5p, miR-34c-3p, miR-1-5p, miR-29b-3p, miR-135a-5p, miR-138-5p, miR-6128, miR-1197-3p, miR-323-3p, miR-145-3p, miR-376c-5p, miR-320a, miR-329a, miR-345-5p, miR-876-3p, miR-10b-3p, miR-1248, miR-376c-5p, miR-503-3p, miR-1271, miR-365a-3p, miR-190a, miR-330-3p, miR-452-5p, miR-493-5p, miR-6240, let-7f-2-3p, let-7f-2-3p, miR-345-5p, miR-1434-3p, miR-542-3p, miR-223-3p, miR-653, miR-138, miR-29b, miR-103a-3p, miR-31-5p, miR-3955-5p, miR-3535, miR-103, miR-425-5p, novel\_1, miR-29a, miR-656-5p, miR-1a-1-5p, miR-29c-3p, miR-1193, miR-2285x, miR-323c, miR-3959-3p, miR-2387, miR-376b-5p, miR-1306, miR-107, miR-412-3p, miR-379-5p, miR-135b-5p, miR-26b-5p, miR-29a-3p, miR-181b-3p, miR-677, miR-320c, miR-2285p, miR-26a-5p, miR-196a-3p, miR-202-5p, miR-320d, miR-30b-3p, miR-181b-1-3p, miR-125b-2-3p, miR-362-3p, novel\_133, miR-140-3p, miR-1434-5p, miR-1193, miR-4429, miR-142-3p, miR-148a-5p, miR-133a-3p, miR-3600, miR-200b, miR-2284h-5p, miR-2285j, miR-3604, miR-320e, miR-324-3p, miR-487a-5p, miR-190a-5p, miR-3184-3p, miR-145a-3p, miR-214, miR-425-5p, miR-345-5p, let-7g-3p, miR-582-5p, miR-496-3p, miR-140-5p, miR-370-5p, miR-3065-3p, miR-582-5p, miR-2284s, novel\_25, novel\_103, miR-1306-5p, miR-320b, miR-362-3p, miR-2957, miR-214-3p, miR-376b, let-7c-3p, miR-8485, miR-4791, miR-484, miR-2284r, miR-329-3p, miR-1388-5p, miR-362-3p, miR-1839-5p, miR-330-3p, miR-181b-2-3p, miR-421, miR-1185-3p, miR-148b-5p, miR-499a-5p, miR-190b-5p, miR-452-5p, miR-409-5p, miR-378j, miR-136-5p, miR-299b-5p, miR-1983, miR-493-5p, miR-664b, miR-126b-5p, miR-2483-3p, miR-1185-2-3p

miR-1839-3p, miR-335-5p, novel\_27, miR-326-3p, miR-371b-3p, miR-24-3p, miR-6529b, miR-656-5p, miR-502b, novel\_1, miR-144-3p, miR-146b-3p, miR-670-3p, miR-150-5p, miR-1306, miR-18a-3p, miR-3141, miR-135b-5p, miR-382, miR-668-3p, miR-3141, miR-2411-3p, novel\_51, miR-125a-5p, miR-124-5p, miR-339-5p, miR-340-3p, miR-31-5p, novel\_116, miR-2355-3p, miR-3535, miR-450c-3p, miR-223-3p, miR-744-5p, miR-30b-3p, miR-16-1-3p, miR-6128, miR-28a-3p, miR-145-3p, miR-1197-3p, miR-144, miR-331-3p, miR-125b-5p, miR-135a-5p, miR-410-3p, miR-592, novel\_9, miR-2355-5p, miR-615-5p, miR-215-5p, miR-125a, miR-365a-3p, miR-7144-5p, miR-23a-5p, miR-3074-1-3p, miR-671-5p, miR-1248, miR-10b-3p, miR-329a, miR-200a, miR-148b-5p, miR-450b-5p, miR-339a, miR-200c, novel\_127, miR-28-3p, miR-200c-3p, miR-7641, novel\_79, miR-412, miR-450a-1-3p, miR-545-5p, miR-129-1-3p, miR-505-5p, miR-758-5p, miR-7134-5p, miR-330-5p, miR-345-3p, miR-1290, miR-2447, miR-423-5p, miR-877-3p, novel\_111, miR-371a-5p, miR-107-5p, miR-382-3p, miR-4726-5p, miR-335, miR-7977, miR-10b, miR-20a-3p, miR-378j, miR-335-3p, miR-544-5p, miR-136-5p, let-7c-3p, miR-33a-5p, miR-652-5p, miR-574-3p, miR-1388-3p, miR-1839-3p, miR-382-3p, miR-101b-3p, miR-362-3p, novel\_103, miR-1306-5p, miR-326, miR-103a-2-5p, miR-214-3p, miR-3955-3p, miR-25-5p, miR-412-3p, miR-30b-3p, miR-329-3p, miR-484, miR-4791, miR-1839-5p, miR-3120-5p, miR-362-3p, miR-214, miR-129-2-3p, miR-3184-5p, miR-338-5p, miR-15b-3p, miR-4492, miR-450b-3p, miR-341-3p, miR-2331-3p, miR-204-3p, miR-151b, miR-192-5p, miR-216b-5p, miR-411, miR-21a-3p, miR-450a-1-3p, let-7g-3p, miR-339b, miR-195a-3p, miR-345-3p, miR-664b-3p, miR-376a-5p, miR-125b, miR-345-3p, miR-185-3p, novel\_17, miR-21-3p, miR-202-5p, miR-3600, miR-18a-3p, miR-151-5p, miR-210-3p, miR-2266, miR-215-5p, miR-362-3p, miR-16-1-3p, miR-361-5p, miR-7859, miR-532-3p, miR-2284z, miR-544b, miR-548e-3p, novel\_78, miR-300, miR-544a, miR-21b, miR-2284aa, miR-873a-5p, miR-542-3p, miR-1434-3p, miR-1290, miR-2478, let-7j, miR-2285b, let-7c-3p, miR-376b, miR-2284m, miR-224-5p, novel\_17, miR-125a-3p, miR-3071-3p, miR-544-3p, miR-374c-3p, miR-133c, miR-548o-3p, let-7g-3p, miR-1248, miR-381-3p, miR-200a-5p, miR-381-3p, miR-129b-5p, miR-378j, miR-224-5p, miR-24-3p, miR-499a-5p, miR-6119-3p, miR-487a-5p, miR-669a-3p, miR-15b-3p, miR-142b

miR-26b-5p, miR-3074-5p, miR-216b-3p, miR-329-5p, miR-320c, miR-374c-3p, miR-299b-3p, miR-216a-3p, miR-21c, miR-18a-3p, miR-505-3p, miR-378f, miR-495-3p, miR-2285x, miR-1a-1-5p, miR-2428, miR-301b-3p, miR-2284w, miR-133a-5p, miR-6402, miR-421-5p, miR-147-5p, miR-199c, miR-379-3p, miR-130a-3p, miR-26b-3p, miR-3955-5p, miR-6238, miR-194-3p, miR-2285g, miR-185-5p, miR-181a-5p, miR-7b-5p, miR-542-3p, miR-1434-3p, miR-380-3p, miR-21-5p, miR-16-1-3p, let-7a-2-3p, miR-190a, miR-105-5p, miR-365b-5p, miR-2411-3p, miR-2331-5p, miR-7-5p, miR-2285aa, miR-3957-5p, miR-3957, miR-374c-3p, miR-320a, novel\_48, miR-1248, miR-10b-3p, miR-2318, miR-329b, let-7g-3p, miR-3607-3p, miR-374b, miR-378c, miR-365a-5p, miR-331-3p, miR-100-3p, miR-6740-5p, miR-1-5p, miR-592, miR-299a-3p, miR-582-3p, novel\_121, miR-378h, miR-345-3p, miR-128-3p, let-7a-2-3p, miR-411-3p, miR-3529-3p, miR-200a, miR-29a-5p, miR-30c-2-3p, miR-3071-3p, miR-2285af, novel\_127, miR-450a-2-3p, miR-127-5p, miR-1a-2-5p, miR-6536, miR-181b-5p, miR-374b-5p, miR-499b-5p, miR-7977, miR-139-5p, miR-4792, miR-452-3p, miR-454-5p, miR-378e, miR-3082-5p, miR-378j, miR-504, miR-190b-5p, miR-181d-5p, novel\_60, miR-3956-3p, miR-154a, novel\_82, miR-490-5p, miR-2285t, miR-2284q, miR-628-3p, miR-3968, miR-199b-3p, miR-105-1, miR-409b, miR-455-3p, miR-216a-3p, miR-421, miR-2285e, miR-6529a, miR-378b, miR-143-5p, miR-21b, miR-378c, miR-494-3p, miR-193a, miR-1b-5p, miR-378d, miR-30c-1-3p, miR-320b, miR-199a-3p, miR-130b-3p, miR-552-3p, miR-30c-1-3p, miR-504-5p, miR-221-5p, miR-378a-3p, miR-545-3p, novel\_25, miR-301a-3p, miR-2284s, miR-139-5p, miR-6130, miR-655, miR-2285c, miR-1895, miR-186-5p, let-7g-3p, miR-378c, miR-539-5p, miR-3074-5p, miR-4510, miR-145a-3p, miR-181c-5p, miR-6525, miR-346, miR-664a-5p, miR-154-3p, miR-190a-5p, miR-3600, miR-505-3p, miR-18a-3p, miR-105-5p, miR-103a-2-5p, let-7a-2-3p, miR-30c-1-3p, miR-374b-3p, miR-197-3p, miR-541, miR-21-5p, miR-105-1, miR-2300a-5p, miR-148b-5p, novel\_87, miR-107-5p, miR-4324, miR-218-5p, miR-2285x, miR-1193, miR-541-3p, miR-219b-3p, miR-323c, miR-211, miR-544-5p, miR-505-3p, miR-136-5p, miR-3120-3p, miR-211-5p, miR-26b-5p, miR-329-5p, miR-378b, miR-203-3p, miR-6535, miR-670-3p, miR-3082-5p, miR-3596, miR-2404, miR-216a-5p, miR-30c-2-3p, miR-3071-3p, miR-26a-5p, miR-2285p, miR-21-3p, miR-181a-2-3p, miR-329a-5p, miR-2285b, miR-148a-5p, let-7a-3p, let-7a-2-3p, miR-105-2, miR-493-3p, miR-505-3p, miR-1224-5p, miR-2332, miR-370-5p, miR-204-5p, miR-410-3p, miR-590-3p, miR-145-3p, miR-301, miR-21a-3p, miR-625-5p, let-7g-3p, miR-10b-3p, miR-370-5p, miR-548o-3p, miR-30c-1-3p, miR-545-3p, miR-365a-3p, miR-300-3p

IRAK3

ENSOARGO(interleu

UBR3

ENSOARGO(ubiquiti

miR-30a-5p, miR-34b-3p, miR-200b-3p, miR-300, miR-429-3p, miR-2285ad, miR-505-5p, miR-219-3p, miR-200c, miR-125a-3p, miR-1260a, miR-200c-3p, miR-181a-2-3p, miR-4286, miR-1271-3p, novel\_39, miR-199a-5p, miR-450b-5p, miR-3154, miR-30e-5p, miR-381-3p, miR-671-5p, miR-1814c, miR-7144-5p, miR-23a-5p, miR-345-5p, miR-2285aa, miR-2284n, miR-199a-5p, miR-3965, miR-3959-5p, miR-34c-5p, miR-135a-5p, miR-26c, miR-331-3p, miR-2332, novel\_63, miR-486b-3p, miR-410-3p, miR-6128, miR-365a-5p, miR-1260b, miR-194-5p, miR-145a-5p, miR-374b-3p, miR-542-3p, miR-708-3p, miR-432, miR-873a-5p, miR-19b-2-5p, miR-653, miR-188-5p, miR-2284x, miR-1260b, miR-219a-1-3p, miR-21-5p, miR-30b-3p, miR-26b-3p, miR-31-5p, miR-194-3p, miR-3431, miR-134-3p, miR-432-5p, miR-3535, miR-2411-3p, miR-194a, miR-365b-5p, miR-197-5p, let-7f-2-3p, let-7f-2-3p, miR-668-3p, miR-130b-5p, miR-345-5p, miR-2284l, miR-432-3p, miR-432-3p, miR-21c, miR-1306, miR-2387, miR-135b-5p, miR-412-3p, miR-2285k, miR-320b, miR-181b-3p, miR-669, miR-677, miR-374c-3p, miR-34b, miR-146b-3p, miR-34c, miR-576-3p, miR-208a-3p, miR-4324, miR-342-3p, miR-219b-3p, miR-199b-5p, miR-2428, miR-374c-5p, miR-449a, miR-5703, miR-2904, miR-1246, miR-2300b-3p, novel\_133, miR-34a-5p, miR-664-5p, miR-218-1-3p, miR-33b-3p, miR-30d-3p, miR-1b-3p, miR-2284h-5p, miR-200b, miR-92a-1-5p, miR-345-3p, miR-216a-5p, miR-208b-3p, miR-34b-5p, miR-221-5p, miR-2284m, miR-202-5p, miR-2285w, miR-486-3p, miR-2424, miR-181b-1-3p, miR-2285i, miR-30d-5p, miR-129b-3p, miR-186-5p, miR-345-5p, miR-552-3p, miR-221-5p, miR-504-5p, novel\_25, miR-6130, miR-320e, miR-19b-1-5p, miR-219b-3p, miR-324-3p, miR-30a-3p, miR-30e-3p, miR-130b-5p, miR-874-5p, miR-487a-5p, miR-3074-2-3p, miR-4510, miR-145a-3p, miR-590-3p, miR-539-5p, miR-758-3p, miR-30b-3p, miR-301b-5p, miR-1791, miR-541, miR-101c, miR-21b, miR-101a-5p, miR-181b-2-

miR-299-3p, miR-221-5p, miR-30b-3p, miR-106a, miR-320d, miR-2284m, miR-125b, miR-542-5p, miR-196a-3p, miR-2411, miR-125b-2-3p, miR-20a, miR-19b-3p, miR-4429, miR-1197-5p, miR-188-3p, miR-5703, miR-362-3p, miR-376a-5p, novel\_83, miR-15a-5p, miR-3600, miR-548e-3p, miR-424-5p, miR-708-5p, miR-155-5p, miR-6516-3p, miR-664a, miR-29b-2-5p, miR-145a-3p, novel\_99, miR-18a-5p, miR-2312, miR-3613-5p, miR-877-5p, miR-155-5p, miR-22-3p, miR-204-3p, miR-139-5p, miR-532-5p, miR-3065-3p, miR-21-3p, miR-221-5p, miR-542-5p, miR-3955-3p, miR-362-3p, novel\_115, miR-326, miR-320b, miR-342, miR-491-3p, miR-3187-3p, miR-30c-1-3p, miR-2330-5p, miR-424-5p, miR-106a-5p, miR-3120-5p, miR-2426, miR-412-3p, miR-2285e, miR-9788-3p, miR-5010-3p, miR-2284q, miR-107-5p, miR-769-5p, miR-9-3p, miR-452-5p, miR-2285f, miR-3059-5p, miR-199b-5p, miR-7977, miR-499b-5p, miR-452-3p, miR-450a-2-3p, miR-339a, miR-30c-2-3p, miR-2285af, miR-490-3p, miR-3065-3p, miR-199a-5p, miR-2478, miR-4286, miR-181a-2-3p, miR-29b-2-5p, miR-134, miR-345-3p, miR-2411-5p, miR-302a-5p, miR-486b-3p, miR-204-5p, miR-28-5p, miR-31-3p, miR-551b-3p, miR-1-5p, miR-93, miR-323-3p, miR-103b, miR-671-5p, miR-23a-5p, miR-17-5p, miR-18a, miR-320a, miR-199a-5p, miR-769, miR-125a-5p, miR-124-5p, miR-17-5p, miR-106a-5p, miR-7862, miR-219a-1-3p, miR-1285, miR-2355-3p, miR-20b, miR-185-5p, miR-2285g, miR-203b-5p, miR-16a, miR-20a-5p, miR-133a-5p, miR-3613, miR-15a, miR-2428, miR-326-3p, miR-24-3p, miR-211, miR-542-5p, novel\_120, miR-135a-2-3p, miR-342-3p, miR-219b-3p, miR-6395, miR-6516-3p, miR-195a-5p, miR-19a-3p, miR-18a-3p, miR-18b, miR-2285ab, miR-670-3p, miR-2404, miR-2484, miR-345-3p, miR-324-3p, miR-500a-5p, novel\_17, miR-618, miR-486-3p, miR-376a-5p, miR-345-3p, miR-361-5p, miR-142-3p, miR-9366, miR-328-3p, miR-7850, miR-106a, miR-18a-3p, miR-874-

miR-3064-5p, miR-1271-3p, miR-199a-5p, miR-28b, miR-30c-2-3p, novel\_96, miR-107, miR-18b-5p, miR-1224-5p, miR-423-3p, miR-6517, miR-299a-3p, miR-134-5p, miR-378h, miR-505-5p, miR-330-5p, miR-134, miR-128-3p, miR-133a-3p, miR-378c, miR-331-3p, miR-125b-5p, miR-6740-5p, miR-134-5p, miR-592, miR-486b-3p, miR-28-5p, miR-615-5p, miR-1271, miR-125a, miR-370-3p, miR-2355-5p, miR-574-5p, miR-324-5p, miR-199a-5p, miR-34c-5p, miR-18a, miR-485-5p, miR-2318, miR-345-5p, miR-329a, miR-876-3p, miR-345-5p, miR-654-3p, miR-455-5p, miR-146a, miR-377-3p, miR-125a-5p, miR-378a-5p, miR-103a-3p, miR-103, miR-2355-3p, miR-432-5p, miR-22-3p, miR-432, miR-2889, miR-455-5p, miR-4508, miR-342-3p, miR-199b-5p, miR-326-3p, miR-449a, miR-24-3p, miR-371b-3p, miR-34c, miR-28c, miR-6123, miR-181b-3p, miR-677, miR-669, novel\_69, miR-34b, miR-299b-3p, miR-216a-3p, miR-18b, miR-6395, miR-378f, miR-146b-5p, miR-107, miR-412-3p, miR-1291, miR-2424, miR-486-3p, miR-146a-5p, miR-181b-1-3p, miR-185-3p, miR-125b, miR-422a, miR-299-3p, miR-34b-5p, miR-760-3p, miR-466i-5p, miR-328-3p, miR-210-3p, miR-378a-3p, miR-5703, miR-2408, miR-362-3p, miR-378i, novel\_133, miR-378d, miR-34a-5p, miR-133a-3p, miR-33b-3p, miR-214, miR-665-5p, miR-378c, miR-338-3p, miR-3184-5p, miR-132-5p, miR-4492, miR-500, miR-708-5p, miR-6516-3p, miR-664a, miR-296-3p, novel\_107, miR-140-5p, miR-378a-3p, miR-504-5p, miR-2331-3p, miR-30c-1-3p, miR-22-3p, miR-2284s, miR-377-3p, miR-500a-3p, miR-1827, miR-1895, miR-18a-5p, miR-345-5p, miR-133b-3p, miR-4532, miR-8485, miR-378d, miR-30c-1-3p, miR-362-3p, miR-326, miR-342, miR-214-3p, miR-199b-5p, miR-146b, miR-3085-3p, miR-491-5p, miR-181b-2-3p, miR-9788-3p, miR-216a-3p, miR-541, miR-301b-5p, miR-2284r, miR-329-3p, miR-378b, miR-362-3p, miR-378c, miR-541-3p, miR-1285-5p, miR-423-5p, miR-361-3p, miR-301a-5p, miR-

miR-127-5p, novel\_127, miR-543-5p, miR-1260a, miR-125a-3p, miR-30c-2-3p, miR-24-2-5p, miR-148b-5p, miR-199a-5p, miR-200a, miR-2284y, miR-2284a, miR-1271-3p, miR-885-3p, miR-3591-5p, miR-615-3p, miR-29d-3p, miR-23b-5p, miR-9-5p, miR-24-2-5p, miR-322-5p, miR-2411-5p, miR-450a-1-3p, miR-214-5p, miR-412, miR-1224-5p, miR-767-5p, miR-592, miR-29b-3p, miR-370-5p, miR-331-3p, miR-135a-5p, miR-1260b, miR-16-5p, miR-2474, miR-767, miR-10b-3p, miR-671-5p, miR-1248, miR-3154, miR-34c-5p, miR-769, miR-199a-5p, miR-324-5p, miR-376c-3p, miR-2355-5p, miR-378a-5p, miR-377-3p, novel\_51, miR-194a, miR-455-5p, miR-432-3p, miR-654-3p, miR-130b-5p, miR-493-5p, miR-16b, miR-29b, miR-1260b, miR-497-5p, miR-26a-2-3p, miR-455-5p, miR-873a-5p, miR-432, miR-450c-3p, miR-145a-5p, miR-194-5p, miR-432-5p, miR-412-5p, miR-194-3p, miR-544b, miR-133b-5p, miR-377-5p, miR-29a, miR-15a, miR-6402, miR-576-3p, miR-16a, miR-34c, miR-371b-3p, miR-449a, miR-199b-5p, novel\_120, miR-342-3p, miR-335-5p, novel\_101, miR-29c-3p, miR-1193, miR-2285x, miR-9851-3p, miR-195a-5p, miR-135b-5p, miR-379-5p, miR-2387, miR-150-5p, miR-18a-3p, miR-323a-5p, miR-411b-3p, miR-29a-3p, miR-374c-3p, miR-670-3p, miR-34b, miR-669, miR-320b, miR-3653-3p, miR-34b-5p, miR-221-5p, miR-196a-3p, novel\_17, miR-92a-1-5p, miR-376c-3p, miR-377-5p, miR-2411, miR-2432, miR-216c-5p, miR-2285w, miR-345-3p, miR-33b-3p, miR-133a-3p, miR-148a-5p, miR-2284u, miR-34a-5p, miR-2300b-3p, miR-124-3p, miR-1197-5p, miR-1193, miR-383-5p, miR-15a-5p, miR-2284h-5p, novel\_83, miR-532-3p, miR-18a-3p, miR-450b-3p, novel\_74, miR-6516-3p, miR-424-5p, miR-874-5p, miR-130b-5p, miR-665, miR-338-5p, miR-769-5p, miR-142a-5p, miR-539-5p, miR-145a-3p, miR-425-5p, miR-214, let-7g-3p, miR-885-3p, miR-1827, miR-450a-1-3p, miR-129b-3p, miR-544-3p, miR-27a-5p, miR-376a-3p, miR-2284c, miR-377-3p, miR-322-3p, miR-3154, miR-199b-5p, miR-671-5p, miR-1827, miR-485-5p, miR-1895, miR-7689-3p, miR-574-5p, miR-2331-3p, miR-6535, miR-199a-5p, miR-6130, miR-193b-3p, miR-615, miR-2433, miR-486b-3p, miR-28-5p, miR-708-5p, miR-664a, miR-128-1-5p, miR-214, miR-665-5p, miR-193a-5p, miR-193b-3p, miR-4510, miR-376a-3p, miR-199b-5p, miR-2428, miR-6134, miR-423-5p, miR-3184-5p, miR-5703, miR-2904, miR-7857, miR-2300b-3p, miR-615-3p, miR-484, miR-378d, miR-1839-5p, miR-431, miR-214-5p, miR-9788-3p, miR-505-5p, miR-383-5p, novel\_51, miR-324-3p, miR-431-5p, miR-543-5p, miR-193a-3p, miR-214-3p, miR-199b-5p, miR-760-3p, miR-2898, miR-127-3p, miR-143-3p, miR-199a-5p, miR-486-3p

CYP4B1

ENSOARGO(cytochrome

PRR36

ENSOARGO(proline



miR-18b-3p, miR-324-3p, miR-299-3p, miR-21-3p, miR-221-5p, miR-34b-5p, miR-760-3p, miR-99a-3p, miR-105-3p, miR-216c-5p, miR-2424, miR-146a-5p, miR-486-3p, miR-1197-5p, miR-188-3p, miR-217-5p, miR-124-3p, miR-191, miR-34a-5p, miR-493-3p, miR-1b-3p, miR-548e-3p, miR-328-3p, miR-532-3p, novel\_83, miR-148b-3p, miR-200b, miR-7859, miR-210-3p, miR-3604, miR-665, miR-655-3p, miR-151-3p, miR-15b-3p, miR-708-5p, miR-4492, miR-129-5p, miR-664a, miR-214, miR-4510, miR-338-3p, miR-3184-5p, miR-769-5p, miR-655, miR-2285c, miR-1827, miR-625-5p, miR-339b, miR-548o-3p, miR-660-5p, miR-504-5p, miR-221-5p, miR-2331-3p, miR-877-5p, miR-6130, miR-326, novel\_103, miR-1306-5p, miR-2285o, miR-103a-2-5p, miR-214-3p, miR-146b, miR-3085-3p, miR-652-5p, miR-494-3p, miR-124a, miR-758-3p, miR-758-3p, miR-7857, miR-412-3p, miR-2426, miR-1388-5p, miR-5010-3p, miR-151a-3p, miR-2285e, miR-2459, miR-107-5p, miR-769-5p, miR-615, miR-2440, miR-2284q, miR-4726-5p, miR-194b-5p, miR-6527, miR-3956-3p, miR-3059-5p, novel\_60, miR-423-5p, miR-361-3p, miR-1306-3p, miR-361-3p, miR-504, miR-96-5p, miR-7977, miR-211-5p, miR-20a-3p, miR-4792, miR-3064-5p, miR-4443, miR-378g, miR-217, miR-339a, miR-200c, miR-8117, miR-1260a, miR-200a-3p, miR-152-3p, miR-200c-3p, miR-3064-5p, miR-3956-5p, novel\_39, miR-29a-5p, miR-380-5p, miR-330-5p, miR-3578, miR-615-3p, miR-200b-3p, novel\_79, miR-1224-5p, miR-412, miR-6517, miR-429-3p, miR-299a-3p, miR-582-3p, miR-1271-5p, miR-135a-5p, miR-331-3p, miR-1306-3p, miR-99b-3p, miR-2433, miR-204-5p, miR-486b-3p, miR-28-5p, miR-191-5p, miR-592, miR-31-3p, miR-138-5p, miR-193a-5p, miR-1197-3p, miR-1260b, miR-2448-3p, miR-876-3p, miR-141-3p, miR-99a-3p, miR-769, miR-34c-5p, novel\_51, miR-194a, miR-146a, miR-466f-3p, miR-660, miR-628-5p, miR-382, miR-380-5p, miR-654-3p, miR-432-3p, miR-194-5p, miR-873a-5p, miR-

miR-18a-3p, miR-3600, miR-485-3p, miR-95-3p, miR-487a-3p, miR-340-5p, miR-200b, miR-15a-5p, miR-616-3p, miR-2284h-5p, miR-191, miR-30c-5p, miR-376a-5p, miR-1193, miR-5703, miR-184-3p, miR-33b-3p, miR-16-1-3p, miR-133a-3p, miR-378d, miR-329a-5p, miR-2285w, miR-487a, miR-345-3p, miR-29b-1-5p, miR-181b-1-3p, miR-130a-5p, miR-30b, miR-216a-5p, miR-324-3p, miR-345-3p, miR-125b, miR-185-3p, miR-202-5p, miR-21-3p, miR-30c-1-3p, miR-154a-3p, miR-216b-3p, miR-544-3p, miR-582-5p, miR-377-3p, miR-15b-5p, miR-598-3p, miR-30d-5p, let-7g-3p, miR-30f, miR-154b-3p, miR-339b, miR-345-5p, miR-582-5p, novel\_99, miR-3074-2-3p, miR-6525, miR-6134, miR-181c-5p, miR-2285j, miR-665, miR-17-3p, miR-664a, miR-874-5p, miR-424-5p, miR-4492, miR-199b-3p, miR-105-1, miR-5010-3p, miR-181b-2-3p, miR-376b-3p, miR-216a-3p, miR-455-3p, miR-1185-3p, miR-2284r, miR-6529a, miR-484, miR-3962, miR-450b-5p, miR-544a, miR-2426, miR-101c, miR-1839-5p, miR-2284aa, miR-1388-3p, miR-2330-5p, miR-424-5p, miR-744-3p, miR-30c-1-3p, miR-8485, miR-2310, miR-342, miR-326, miR-29b-1-5p, miR-16b, miR-491-5p, miR-664b, miR-4792, miR-541-5p, miR-7977, miR-3082-5p, miR-1185-2-3p, miR-376d, miR-361-3p, miR-129b-5p, miR-378j, miR-493-5p, miR-376a-3p, miR-1983, miR-877-3p, miR-3059-5p, miR-452-5p, miR-181d-5p, miR-877-3p, miR-361-3p, miR-30b-5p, miR-490-5p, miR-6517, miR-429-3p, miR-7641, novel\_79, miR-376a-5p, miR-322-5p, miR-2284z, novel\_121, miR-196a-5p, miR-345-3p, miR-3578, miR-1343-5p, miR-30a-5p, miR-330-5p, miR-105-2, miR-200b-3p, miR-128-3p, miR-2385-3p, miR-181a-2-3p, miR-380-5p, miR-148b-5p, miR-376b-5p, miR-376c-5p, miR-1271-3p, miR-2285af, miR-376b-3p, miR-8117, miR-664-3p, miR-200c, miR-30c-2-3p, miR-339a, miR-17-3p, miR-200c-3p, miR-127-5p, miR-181b-5p, novel\_127, novel\_96, miR-487a-3p, miR-2355-5p, miR-508-3p, miR-1271, miR-125a, miR-274c-3p, miR-154b, miR-148b-5p, miR-532-3p, miR-320c, miR-300-3p, miR-340-5p, miR-2285aa, miR-3120-3p, miR-496-3p, miR-503-3p, miR-543-3p, miR-148a-5p, miR-496, miR-4429, miR-1260b, miR-320a, miR-21a-3p, miR-181a-5p, miR-2285b, miR-181c-5p, miR-148b-5p, miR-1260b, miR-181d-5p, miR-1306-5p, miR-320d, miR-181b-5p, miR-2957, miR-320b, miR-1260a, miR-618, miR-141-3p, miR-26b-5p, miR-221-5p, novel\_68, miR-548o-3p, miR-27a-3p, miR-377-3p, miR-23b, miR-6516-3p, miR-145a-3p, miR-331-3p, miR-33a-3p, miR-29b-2-5p, miR-22-5p, miR-3600, miR-27a-3p, miR-548e-3p, miR-330-3p, miR-7859, miR-23b-3p, miR-23c, miR-27b-3p, novel\_73, miR-29b-2-5p, miR-23a-3p, miR-6240, miR-143-3p, miR-29b-1-5p, miR-130a-5p, miR-330-3p, miR-29b-1-5p, miR-26a-5p, miR-377-3p, miR-221-5p, miR-466f-3p, miR-200a-3p, miR-21-3p, miR-760-3p, miR-204-3p, miR-2447, miR-320b, miR-4286, miR-128-1-5p, miR-450b-3p, miR-4492, miR-324-3p

|        |                     |
|--------|---------------------|
| OAS1   | ENSOARGO(2' -5' -ol |
| CTNNB1 | ENSOARGO(catenin    |
| SPDL1  | ENSOARGO(spindle    |
| DHX30  | ENSOARGO(DEAH (As   |

miR-228bv, miR-380-5p, miR-228br, miR-654-3p, miR-34b-5p, miR-197-3p, miR-374b-3p, miR-16b, miR-1260b, miR-497-5p, miR-188-5p, miR-339-5p, miR-26b-3p, miR-2285g, miR-134-3p, miR-185-5p, miR-343l, miR-149-5p, miR-2355-3p, miR-15a, miR-16a, miR-22-5p, miR-199c, miR-3957-3p, novel\_101, miR-758-5p, miR-17-3p, miR-199b-5p, miR-2285ab, miR-148a-3p, miR-2387, miR-18a-3p, miR-216a-3p, miR-410-5p, miR-195a-5p, miR-3074-5p, miR-320b, miR-2404, miR-374c-3p, miR-1260a, miR-200c, miR-339a, miR-17-3p, miR-200c-3p, miR-152-3p, novel\_127, miR-181a-2-3p, miR-4286, miR-380-5p, miR-199a-5p, miR-134, miR-200b-3p, miR-128-3p, miR-429-3p, novel\_79, miR-322-5p, miR-24-2-5p, miR-505-5p, miR-134-5p, miR-129-1-3p, miR-551b-3p, miR-26c, miR-3969, miR-31-3p, miR-28-5p, miR-134-5p, miR-1306-5p, miR-16-5p, miR-1260b, miR-2448-3p, miR-329a, miR-345-5p, miR-23a-5p, miR-7144-5p, miR-671-5p, miR-485-5p, miR-1248, miR-2285aa, miR-1271, miR-300-3p, miR-374c-3p, miR-199a-5p, miR-362-3p, miR-16b, miR-25-5p, miR-199b-5p, miR-424-5p, miR-2284r, miR-329-3p, miR-143-5p, miR-125b-2-3p, miR-362-3p, miR-1839-5p, miR-3120-5p, miR-199b-3p, miR-5010-3p, miR-222-5p, miR-1298-3p, miR-216a-3p, miR-9788-3p, miR-2285e, miR-421, miR-2440, miR-371a-5p, miR-7134-3p, miR-2285f, miR-219a-5p, miR-361-3p, miR-1285-5p, miR-140-5p, miR-199b-5p, miR-139-5p, miR-20a-3p, miR-2319b, miR-378g, miR-3082-5p, miR-203-3p, miR-210-5p, miR-30b-3p, miR-216c-5p, miR-376a-5p, miR-2424, miR-376a-5p, miR-362-3p, miR-98-3p, miR-140-3p, miR-188-3p, miR-664-5p, let-7a-3p, miR-548e-3p, miR-18a-3p, miR-380-5p, miR-7859, miR-148b-3p, miR-15a-5p, miR-200b, miR-532-3p, let-7b-3p, miR-664a, miR-17-3p, miR-4492, miR-708-5p, miR-424-5p, miR-129-2-3p, miR-3074-5p, miR-3958-5p, miR-665-5p, miR-346, miR-98-3p, miR-122-5p, miR-2285c, let-7f-1-3p, miR-199b-3p, miR-2312, miR-245-5p, miR-320b, miR-139-3p, miR-138, miR-16b, miR-497-5p, miR-2113, miR-223-3p, miR-3962, miR-330-3p, miR-16b, miR-330-3p, miR-101b-3p, miR-6240, miR-424-5p, miR-1388-3p, miR-652-5p, miR-363-5p, miR-23a-3p, miR-136-5p, miR-19a-3p, novel\_94, miR-505-3p, miR-195a-5p, miR-2285ab, miR-3065-5p, miR-18a-3p, miR-378j, miR-3082-5p, miR-2319b, miR-499a-5p, miR-6119-3p, miR-203b-5p, miR-142b, miR-15a, miR-16a, miR-2285f, miR-19b-3p, miR-885-3p, miR-140-3p, miR-2427, miR-218-2-3p, miR-23c, miR-15a-5p, miR-23b-3p, miR-7859, miR-322-5p, miR-616-3p, miR-548e-3p, miR-18a-3p, miR-505-3p, miR-30d-3p, miR-21-3p, novel\_127, miR-2285p, miR-30a-3p, let-7g-3p, miR-2312, novel\_99, miR-885-3p, miR-23b, miR-15b-5p, miR-545-3p, miR-552-3p, miR-615-5p, miR-2285aa, miR-138-5p, miR-424-5p, miR-30e-3p, miR-3604, miR-30a-3p, miR-16-5p

MPI ENSOARGO(mannose

TIPARP ENSOARGO(TCDD-ind

miR-429-3p, miR-106a, miR-200b, miR-24-2-5p, miR-582-3p, miR-545-5p, miR-3591-5p, miR-30c-5p, miR-1434-5p, miR-30a-5p, miR-33b-3p, miR-200b-3p, miR-20a, miR-24-2-5p, miR-380-5p, miR-2285b, miR-664-3p, miR-26a-5p, miR-200c, miR-3071-3p, miR-500a-5p, miR-30f, miR-200c-3p, miR-106a, miR-92a-3p, miR-21-3p, miR-30d, miR-32-5p, miR-1271, miR-2448-3p, miR-2285c, miR-30e-5p, miR-299, miR-30d-5p, miR-17-5p, miR-655, miR-362-5p, miR-93-5p, miR-500a-3p, miR-186-5p, miR-20b-5p, miR-665-5p, miR-193a-5p, miR-93, miR-500b-5p, miR-145-3p, miR-34c-3p, miR-655-3p, miR-338-5p, miR-324-3p, miR-500, miR-199b-3p, miR-1343-3p, miR-2285g, miR-2285e, miR-20b, miR-500-5p, miR-2113, novel\_23, miR-299a-5p, miR-106a-5p, miR-101b-3p, miR-380-5p, let-7c-3p, miR-106b-5p, miR-17-5p, miR-106a-5p, miR-32, miR-24-1-5p, miR-664b, miR-26b-5p, miR-2404, miR-299b-5p, miR-362-5p, miR-1285-5p, miR-20a-5p, miR-502-5p, miR-92a-3p, miR-199c, miR-3964

miR-378d, miR-8485, miR-124a, miR-1839-3p, miR-3085-3p, miR-7-5p, miR-326, novel\_51, miR-194-3p, miR-1185-3p, miR-409b, novel\_4, miR-378c, miR-4508, miR-744-5p, miR-7862, miR-296-5p, miR-378b, miR-7b-5p, miR-541, miR-211, miR-326-3p, miR-541-3p, miR-1839-3p, miR-2285x, miR-17-3p, miR-1193, miR-4726-5p, miR-2440, miR-7857-3p, miR-378e, miR-3596, miR-669, miR-1185-2-3p, miR-3064-5p, miR-3074-5p, miR-320b, miR-2285u, miR-211-5p, miR-378f, miR-18b, miR-376c-3p, miR-2285b, miR-105-3p, miR-3064-5p, miR-4286, miR-345-3p, miR-17-3p, miR-466i-5p, miR-3601, miR-422a, miR-210-3p, miR-378h, miR-7641, miR-18b-5p, miR-378i, miR-215-5p, miR-124-3p, miR-378a-3p, miR-23b-5p, miR-330-5p, miR-140-3p, miR-378c, miR-378c, miR-3074-5p, miR-2330-3p, miR-17-3p, miR-874-5p, miR-4492, miR-208b-5p, miR-204-5p, miR-551b-3p, miR-370-5p, miR-3969, miR-376e-3p, miR-192-5p, miR-378a-3p, miR-370-5p, miR-615-5p, miR-215-5p, miR-18a-5p, miR-625-5p, miR-1895, miR-671-5p, miR-18a

DOCK4 ENSOARGO( dedicato

ADCY9 ENSOARGO( adenylat

miR-2300a-5p, miR-330-3p, miR-1343-3p, novel\_4, miR-9788-3p, miR-216a-3p, miR-455-3p, miR-376b-3p, miR-142-5p, miR-496-5p, miR-501-3p, miR-2284r, miR-1388-3p, miR-193a, miR-4532, novel\_115, miR-5126, miR-199b-5p, miR-25-5p, novel\_124, miR-126b-5p, miR-4443, miR-376d, miR-500-3p, miR-199b-5p, miR-409-5p, miR-361-3p, miR-376a-3p, miR-194b-5p, miR-2447, miR-502-3p, miR-877-3p, miR-30b-5p, miR-4726-5p, miR-3968, miR-3960, miR-328-3p, miR-2904, miR-2300b-3p, miR-2366, miR-191, miR-30c-5p, miR-218-1-3p, miR-664-5p, miR-493-3p, miR-486-3p, miR-421-5p, miR-125b, miR-30b, miR-2484, miR-30d, miR-760-3p, miR-202-5p, miR-552-3p, miR-3065-3p, miR-204-3p, novel\_25, miR-6130, miR-2284s, miR-30d-5p, miR-500a-3p, miR-598-3p, miR-21a-3p, miR-1827, miR-186-5p, miR-30f, miR-145a-3p, miR-4510, miR-338-3p, miR-6134, miR-142a-5p, miR-4492, miR-500, miR-194-3p, miR-194-5p, miR-431-3p, miR-7862, miR-744-5p, miR-26a-2-3p, miR-29b, miR-6240, miR-380-5p, miR-194a, miR-365b-5p, miR-330-3p, miR-1343-5p, miR-125a-5p, miR-3120-3p, miR-378b, miR-6535, miR-669, miR-29a-3p, miR-374c-3p, miR-216a-3p, miR-376b-3p, miR-6395, miR-1291, miR-29c-3p, miR-3957-3p, miR-199b-5p, miR-28c, miR-29a, miR-128-1-5p, novel\_121, miR-214-5p, miR-30a-5p, miR-501-3p, miR-29d-3p, miR-1343-5p, miR-3578, miR-30c, miR-128-3p, miR-1271-3p, miR-199a-5p, miR-1957a, miR-3065-3p, miR-380-5p, miR-28b, miR-30f, miR-376b-3p, miR-205-5p, miR-125a, miR-598-3p, miR-370-3p, miR-199a-5p, miR-2448-3p, miR-30e-5p, miR-23a-5p, miR-10b-3p, novel\_42, miR-365a-5p, miR-331-3p, miR-125b-5p, miR-29b-3p, miR-2433, miR-191-5p, miR-486b-3p, miR-499a-5p, miR-450b-3p, miR-487b-5p, miR-382-5p, miR-382-3p, miR-133a-3p, miR-133b-3p, miR-30f, miR-2318, miR-30d-5p, miR-30e-5p, miR-450a-1-3p, miR-6535, miR-324-5p, miR-7857-3p, miR-30c-1-3p, miR-487b-5p, miR-30c-2-3p, miR-2285p, miR-143-3p, miR-30c-1-3p, miR-494-3p, miR-30c, miR-101a-5p, miR-142-3p, miR-450c-3p, miR-30a-5p, miR-873a-5p, miR-30c-5p, miR-450a-1-3p, miR-421, miR-505-3p, miR-145b, miR-133b-5p, miR-1343-3p, miR-31-5p, miR-185-5p, miR-425-3p, miR-30b-3p, miR-145a-5p, miR-541, miR-744-5p, miR-29b, miR-30b-3p, miR-4532, miR-326, miR-214-3p, miR-125a-5p, miR-3085-3p, miR-483-3p, miR-7977, miR-3064-5p, miR-29a-3p, novel\_69, miR-150-5p, miR-2387, miR-361-3p, miR-29c-3p, miR-541-3p, miR-2428, miR-423-5p, miR-326-3p, miR-24-3p, miR-361-3p, miR-1307-5p, novel\_82, miR-4324, miR-29a, miR-4726-5p, miR-212-5p, miR-429-3p, miR-6517, miR-151-5p, miR-483-3p, miR-200b, miR-505-5p, miR-330-5p, miR-5703, miR-2427, miR-29d-3p, miR-200b-3p, miR-582-3p, miR-2403, miR-4286, miR-3064-5p, miR-3065-3p, miR-29a-5p, miR-486-3p, miR-185-3p, miR-125b, miR-125a-3p, miR-200c, miR-21-3p, miR-200c-3p, miR-450a-2-3p, miR-615-5p, miR-125a, miR-3065-3p, miR-151b, miR-300-3p, miR-129b-3p, miR-488-3p, miR-214, miR-3184-5p, miR-6525, miR-665, miR-125b-5p, miR-2433, miR-29b-3p, miR-486b-3p, miR-4492

miR-5703, miR-1193, miR-140-3p, miR-191, miR-2300b-3p, miR-4429, miR-142-3p, miR-485-3p, miR-30d-3p, miR-548e-3p, miR-671-3p, miR-7859, miR-487a-3p, miR-23b-3p, miR-23c, miR-324-3p, miR-345-3p, novel\_17, miR-3653-3p, miR-30b-3p, miR-320d, miR-216c-5p, miR-146a-5p, miR-2432, miR-421-5p, miR-181b-1-3p, miR-543-3p, miR-625-5p, miR-345-5p, miR-532-5p, miR-2331-3p, miR-22-3p, miR-877-5p, miR-10a, miR-30a-3p, miR-30e-3p, miR-487a-5p, miR-129-5p, miR-708-5p, novel\_74, miR-3074-2-3p, miR-665-5p, miR-6134, miR-10b-5p, miR-758-3p, miR-10b, miR-450b-5p, miR-181b-2-3p, miR-145b, miR-105-1, miR-421, miR-153, miR-505, miR-320b, miR-146b, miR-153-3p, miR-23a-3p, miR-1388-3p, miR-193a, miR-8485, miR-758-3p, miR-378j, miR-129b-5p, miR-3963, miR-211-5p, miR-2483-3p, miR-7134-3p, miR-452-5p, miR-3059-5p, miR-7705, novel\_111, miR-345-3p, miR-105-2, miR-10a-5p, novel\_121, miR-24-2-5p, miR-505-5p, miR-2898, miR-127-5p, miR-1a-2-5p, miR-30a-3p, miR-4286, miR-2285b, miR-450b-5p, miR-320a, miR-23b, miR-488-3p, miR-331-5p, miR-7144-5p, miR-345-5p, miR-365a-3p, miR-100-3p, miR-135a-5p, miR-1-5p, miR-410-5p, miR-5100, miR-204-5p, miR-28-5p, miR-191-5p, miR-331-5p, miR-193a-5p, let-7e-3p, miR-22-3p, miR-145a-5p, novel\_23, miR-432, miR-653, miR-873a-5p, miR-1843b-5p, miR-7b-5p, miR-1434-3p, miR-188-5p, miR-26b-3p, novel\_116, miR-432-5p, miR-185-5p, miR-105-5p, miR-2411-3p, miR-7-5p, miR-146a, miR-378a-5p, let-7j, miR-539-3p, miR-345-5p, miR-150-5p, miR-146b-5p, miR-135b-5p, miR-10a-5p, miR-216b-3p, miR-320c, miR-677, miR-181b-3p, miR-4324, miR-576-3p, miR-22-5p, miR-421-5p, miR-128-1-5p, novel\_101, miR-1a-1-5p, novel\_27, miR-211

miR-1814c, miR-1827, miR-2319a, miR-320a, miR-6130, miR-499b-3p, miR-499a-3p, miR-320c, miR-664b, miR-211-5p, miR-499b-5p, miR-6119-3p, miR-204-5p, miR-147-5p, miR-4492, miR-218-5p, miR-382-5p, novel\_87, miR-301a-5p, miR-100-3p, miR-371a-5p, miR-6525, miR-211, miR-361-3p, miR-3184-5p, miR-423-5p, miR-4510, miR-101a-5p, miR-4429, miR-301b-5p, miR-3431, miR-496-5p, miR-2284z, miR-455-3p, miR-450a-2-3p, miR-491-5p, miR-320d, novel\_96, miR-664-3p, miR-320b, miR-185-3p, miR-505, miR-2310, miR-503-3p, miR-8485

STON2 ENSOARGO(stonin 2)

SSR3 ENSOARGO(signal s)

miR-3068-3p, miR-874-3p, miR-769, miR-34c-5p, miR-30e-5p, miR-100-5p, miR-376c-5p, miR-1248, miR-7144-5p, miR-1306-5p, miR-16-5p, miR-378c, miR-29b-3p, miR-551b-3p, miR-331-3p, miR-592, miR-2285ad, miR-431, miR-483-3p, miR-378h, miR-322-5p, miR-450a-1-3p, miR-23b-5p, miR-30a-5p, miR-29d-3p, miR-1343-5p, miR-99a-5p, miR-3956-5p, miR-192-3p, miR-99a, miR-217, miR-2898, novel\_96, novel\_68, miR-3120-3p, miR-655-5p, miR-29a-3p, miR-34b, miR-2404, miR-376b-5p, miR-3065-5p, miR-1306, miR-412-3p, miR-2285k, miR-378f, miR-195a-5p, miR-29c-3p, miR-3957-3p, miR-371b-3p, miR-24-3p, miR-2284w, miR-449a, miR-4324, miR-15a, miR-1307-5p, miR-16a, miR-34c, miR-29a, miR-122-3p, miR-3955-5p, miR-503-5p, miR-412-5p, miR-3535, miR-149-5p, miR-450c-3p, miR-16-1-3p, miR-16b, miR-29b, miR-30b-3p, miR-497-5p, miR-6240, miR-654-3p, miR-503-5p, miR-99a-5p, miR-330-3p, miR-483-3p, miR-1343-5p, miR-452-5p, miR-140-5p, miR-545-3p, miR-378a-3p, miR-296-3p, miR-532-5p, miR-877-5p, miR-15b-5p, miR-204-3p, miR-450a-1-3p, miR-21a-3p, miR-30d-5p, miR-186-5p, novel\_99, miR-1827, miR-590-3p, miR-378c, miR-214, miR-2330-3p, miR-346, miR-769-5p, miR-665, miR-450b-3p, miR-424-5p, miR-340-5p, miR-15a-5p, miR-193b-5p, miR-378i, miR-217-5p, miR-378a-3p, miR-34a-5p, miR-16-1-3p, miR-503-5p, miR-216c-5p, miR-345-3p, miR-195a-3p, miR-130a-5p, miR-2285i, miR-2285p, miR-92a-1-5p, miR-422a, miR-122-3p, miR-324-3p, miR-466i-5p, miR-34b-5p, miR-30d, miR-20a-3p, miR-7977, miR-2285u, miR-3082-5p, miR-378e, miR-203-3p, miR-409-5p, miR-361-3p, miR-381-3p, miR-378j, miR-99b-5p, miR-147-3p, miR-877-3p, miR-1983, miR-212-3p, miR-2447, miR-30b-5p, miR-2285n, miR-107-5p, miR-371a-5p, miR-769-5p, miR-3968, miR-330-3p, novel\_4, miR-548w, miR-4791, miR-6529a, miR-378b, miR-484, miR-30b-3p, miR-2426, miR-378c, miR-21b, miR-16-2-3p, miR-424-5p, miR-2330-5p, miR-1388-

miR-544a, miR-2426, miR-1388-5p, miR-16-2-3p, miR-21b, miR-2284r, miR-484, miR-1298-3p, miR-455-3p, miR-409b, novel\_78, miR-1343-3p, miR-548w, miR-27a-3p, miR-5010-3p, miR-3085-3p, miR-491-5p, novel\_115, miR-431-5p, novel\_103, miR-1306-5p, miR-326, miR-16b, miR-182-5p, miR-505, miR-30c-1-3p, miR-2310, miR-8485, miR-424-5p, miR-1388-3p, let-7c-3p, miR-136-5p, miR-181a-3p, miR-96-5p, miR-9-3p, miR-361-3p, miR-378j, miR-129b-5p, miR-378g, miR-27a-3p, miR-2319b, miR-3064-5p, miR-139-5p, miR-7977, miR-211-5p, miR-2285u, miR-335, miR-3958-3p, miR-4726-5p, miR-490-5p, miR-101-3p, novel\_82, novel\_111, miR-361-3p, miR-1285-5p, miR-423-5p, miR-9-3p, miR-885-5p, miR-184-3p, miR-378d, miR-140-3p, miR-1434-5p, miR-5703, miR-2904, miR-15a-5p, miR-616-3p, miR-18a-3p, miR-212-5p, miR-2484, miR-21-3p, miR-221-5p, miR-2285p, miR-125b, miR-185-3p, miR-92a-1-3p, miR-324-3p, miR-376a-5p, miR-380-3p, miR-2424, miR-216c-5p, miR-195a-3p, miR-582-5p, miR-1895, miR-450a-1-3p, miR-21a-3p, miR-139-5p, miR-544-3p, miR-582-5p, miR-6516, miR-15b-5p, miR-22-3p, miR-548o-3p, miR-30c-1-3p, miR-221-5p, miR-296-3p, miR-552-3p, miR-182-5p, miR-370-5p, miR-3065-3p, miR-17-3p, miR-450b-3p, miR-130b-5p, miR-708-5p, miR-424-5p, miR-208b-5p, miR-4492, miR-2285j, miR-3604, miR-6525, miR-338-3p, miR-6134, miR-3184-5p, miR-3074-5p, miR-129-2-3p, miR-3074-2-3p, miR-665-5p, miR-1271, miR-3958-5p, miR-29b, miR-380-3p, miR-16b, miR-7862, miR-27b-3p, miR-188-5p, miR-455-5p, miR-497-5p, miR-7b-5p, miR-542-3p, miR-1434-3p, miR-223-3p, miR-3071-5p, miR-450c-3p, miR-22-3p, miR-3431, miR-134-3p, miR-544b, miR-194-3p, miR-149-5p, miR-187-3p, miR-3955-5p, miR-665, miR-483-3p, miR-452-5p, miR-125a-5p, miR-7-5p, miR-455-5p, novel\_51, miR-432-3p, miR-432-3p, miR-654-3p, let-7i, miR-130b-5p, miR-450b-3p, miR-410-5p, miR-



miR-125b-2-3p, miR-301b-5p, miR-143-5p, miR-378b, miR-101c, miR-2284aa, miR-544a, miR-378c, miR-27a-3p, miR-145b, miR-105-1, miR-1185-3p, miR-421, miR-455-3p, miR-9788-3p, miR-182-5p, miR-505, miR-199a-3p, miR-103a-2-5p, miR-3955-3p, miR-130b-3p, miR-652-5p, miR-744-3p, let-7c-3p, miR-23a-3p, miR-1388-3p, miR-2310, miR-3187-3p, miR-378d, miR-381-3p, miR-378j, miR-361-3p, novel\_94, miR-877-3p, miR-181a-3p, miR-3963, miR-211-5p, miR-7977, miR-7689-3p, miR-499b-5p, miR-2319b, miR-27a-3p, miR-1185-2-3p, miR-2483-3p, miR-25, miR-378e, miR-107-5p, miR-301a-5p, miR-371a-5p, miR-218-5p, miR-2285n, miR-154-3p, miR-9-5p, miR-181d-5p, miR-3956-3p, miR-212-3p, miR-3059-5p, novel\_60, miR-154a, miR-7705, novel\_111, miR-1197-5p, miR-378a-3p, miR-188-3p, miR-5703, miR-140-3p, miR-1434-5p, miR-98-3p, miR-378i, let-7a-3p, miR-218-1-3p, miR-212-5p, miR-3600, miR-380-5p, miR-548e-3p, miR-532-3p, miR-199a-3p, miR-23c, miR-487a-3p, miR-23b-3p, miR-7859, miR-422a, miR-345-3p, miR-500a-5p, miR-216a-5p, miR-208b-3p, miR-2285p, miR-2484, miR-221-5p, miR-466i-5p, miR-105-3p, miR-487a, miR-216c-5p, miR-143-3p, miR-376c-3p, miR-433-3p, let-7f-1-3p, miR-582-5p, miR-186-5p, miR-543-3p, miR-625-5p, miR-154b-3p, miR-339b, miR-296-3p, miR-552-3p, miR-182-5p, miR-21-3p, miR-548o-3p, miR-378a-3p, miR-221-5p, novel\_25, miR-323-5p, miR-544-3p, miR-376e-3p, miR-301a-3p, miR-6516, miR-582-5p, miR-338-5p, let-7b-3p, miR-2285j, miR-454-3p, miR-6516-3p, miR-425-5p, miR-378c, miR-338-3p, miR-6134, miR-181c-5p, miR-98-3p, novel\_23, miR-145a-5p, miR-197-3p, miR-7b-5p, miR-542-3p, miR-181a-5p, miR-223-3p, miR-432, miR-27b-3p, miR-7862, miR-26b-3p, miR-339-5p, miR-130a-3p, miR-103a-3p, miR-103, miR-2355-3p, miR-544b, miR-185-5p, miR-432-5p, miR-2411-3p, miR-105-5p, miR-7-5p, miR-378a-5p, miR-483-3p, let-7f-2-3p, let-7f-2-3p, miR-380-5p, miR-530-

miR-809b, miR-30b9-5p, novel\_60, miR-32-3p, miR-194b-5p, miR-452-5p, miR-4726-5p, miR-450a-5p, miR-382-3p, miR-2285n, miR-2285y, miR-1973, miR-107-5p, miR-376d, miR-10b, miR-452-3p, miR-541-5p, miR-499b-5p, miR-877-3p, miR-361-3p, miR-199b-5p, miR-129b-5p, miR-30c-1-3p, miR-3187-3p, miR-758-3p, miR-3955-3p, miR-320b, miR-1306-5p, miR-326, miR-216a-3p, miR-9788-3p, miR-221-3p, miR-105-1, miR-2300a-5p, miR-222-5p, miR-2426, miR-2284aa, miR-6529a, miR-484, miR-10b, miR-412-3p, miR-10b-5p, miR-338-3p, miR-539-5p, miR-145a-3p, miR-17-3p, miR-6516-3p, miR-222-3p, miR-324-3p, miR-19b-1-5p, miR-320e, miR-27a-5p, miR-193b-3p, miR-22-3p, miR-204-3p, miR-877-5p, miR-221-5p, miR-545-3p, miR-32-3p, miR-532-5p, miR-154b-3p, miR-21a-3p, miR-2432, miR-146a-5p, miR-2284m, miR-320d, miR-30b-3p, miR-221-5p, miR-21-3p, miR-196a-3p, miR-374a-5p, miR-487a-3p, miR-200b, miR-548e-3p, miR-3600, miR-4429, miR-378d, novel\_133, miR-1197-5p, miR-140-3p, miR-1193, miR-211, miR-323c, miR-326-3p, miR-495-3p, miR-17-3p, miR-2285x, miR-92a-3p, miR-656-5p, miR-199c, miR-147-5p, miR-133a-5p, miR-33a-3p, miR-382-5p, miR-10a-5p, miR-9851-3p, miR-135b-5p, miR-21c, miR-376b-3p, miR-539-3p, miR-345-5p, miR-1343-5p, miR-466f-3p, miR-2284d, miR-2355-3p, miR-125b-1-3p, miR-7862, miR-653, miR-194-5p, miR-145a-5p, miR-374b-3p, miR-145-3p, miR-1306-5p, miR-374b, miR-3607-3p, miR-204-5p, miR-34c-3p, miR-1306-3p, miR-144, miR-331-3p, miR-135a-5p, miR-199a-5p, miR-154b-5p, miR-487a-3p, miR-10b-3p, miR-671-5p, miR-488-3p, miR-320a, miR-199a-5p, miR-1957a, miR-376c-5p, miR-376b-5p, miR-17-3p, miR-200c-3p, miR-543-5p, miR-92a-3p, miR-376b-3p, miR-2285af, miR-200c, miR-2397-5p, miR-30c-2-3p, miR-222, miR-582-3p, miR-200b-3p, miR-105-2, miR-10a-5p, miR-345-3p, miR-134, miR-7134-5p, miR-361-3p, miR-7705, miR-2447, miR-362-3p, miR-3956-3p, miR-2284i, miR-154-3p, miR-199a-3p, miR-544a, miR-4429, miR-3963, miR-1814c, miR-155-5p, miR-1197-5p, miR-320a, miR-188-3p, miR-150-5p, miR-147a, miR-544-3p, miR-7857-3p, miR-155-5p, miR-544b, miR-320c, miR-182-5p, miR-155-5p, miR-320d, miR-130b-5p, miR-208b-5p, miR-31-3p, miR-142b, novel\_17, miR-320b, miR-182-5p, miR-130a-5p, miR-2478, miR-877-3p, miR-2310, miR-130b-5p, miR-3059-5p

MND1 ENSOARGO(meiotic

FAM71F1 ENSOARGO family w

miR-1224-5p, miR-412, miR-429-3p, miR-2285ad, miR-486-5p, miR-450a-1-3p, miR-758-5p, miR-1290, miR-155-5p, miR-192-3p, miR-2285b, let-7g, novel\_39, miR-450b-5p, miR-30f, miR-3071-3p, miR-205-5p, let-7f-5p, miR-127-5p, miR-2285aa, miR-200a-5p, miR-93-5p, miR-20b-5p, miR-345-5p, miR-2318, miR-2284v, miR-1260b, miR-494-5p, miR-2284k, miR-31-5p, miR-3955-5p, miR-134-3p, miR-450c-3p, miR-223-3p, miR-2113, miR-1843b-5p, miR-542-3p, miR-19b-2-5p, miR-432, miR-2284x, miR-628-5p, miR-380-5p, let-7a-2-3p, miR-2284l, miR-432-3p, miR-432-3p, novel\_51, miR-2411-3p, miR-146a, miR-378a-5p, miR-329-5p, miR-181b-3p, miR-320c, miR-677, miR-216a-3p, miR-3065-5p, let-7e-5p, miR-146b-5p, novel\_87, miR-421-5p, miR-379-3p, miR-30d-3p, miR-106a, miR-328-3p, miR-95-3p, miR-217-5p, miR-1434-5p, miR-193b-5p, miR-1961, miR-133a-3p, miR-33b-3p, novel\_73, miR-493-3p, miR-195a-3p, miR-329a-5p, miR-181b-1-3p, miR-664b-3p, miR-345-3p, miR-2285p, let-7k, miR-3653-3p, miR-98-5p, miR-504-5p, miR-2331-3p, let-7i-5p, miR-487b-5p, miR-450a-1-3p, miR-186-5p, miR-625-5p, miR-345-5p, miR-214, let-7b, miR-346, miR-224-5p, miR-6525, miR-3604, miR-30a-3p, miR-30e-3p, let-7f, miR-874-5p, miR-487b-5p, miR-145b, miR-181b-2-3p, miR-548w, miR-2459, miR-455-3p, miR-147a, miR-323b, miR-301b-5p, miR-106b-5p, miR-323b-3p, miR-199a-3p, miR-214-3p, miR-146b, miR-487b-5p, miR-7689-3p, miR-139-5p, miR-2483-3p, miR-378g, miR-3596, miR-381-3p, miR-378j, miR-140-5p, miR-9-3p, miR-504, miR-2284j, miR-3956-3p, miR-1285-5p, novel\_111, miR-877-3p, miR-301a-5p, miR-3964, miR-490-5p, miR-3968, miR-545-5p, miR-6516-5p, miR-2411-5p, miR-345-3p, let-7a-2-3p, miR-128-3p, let-7d, miR-582-3p, miR-411-3p, miR-30a-3p, miR-1271-3p, miR-380-5p, miR-2478, let-7c-5p, miR-217, miR-200c, miR-2285af, miR-1260a, miR-200c-3p, miR-17-3p, miR-370-3p, miR-17-5p, miR-320a, miR-3154, miR-2448, miR-3956, miR-132-5p, miR-193b-3p, miR-299, miR-543-3p, miR-877-3p, miR-671-5p, miR-107, miR-193b-3p, miR-214, miR-17-3p, novel\_42, miR-1306-5p, novel\_27, miR-132-5p, miR-369-5p, miR-371a-5p, miR-29b-2-5p, miR-301a-5p, miR-551b-3p, miR-28c, novel\_74, miR-17-3p, miR-6517, miR-103a-3p, miR-2355-3p, miR-103, miR-214-5p, miR-496-5p, miR-301b-5p, miR-369-5p, miR-7862, miR-3120-5p, miR-125b-1-3p, miR-495-5p, miR-29b-2-5p, miR-1388-3p, miR-494-3p, miR-143-3p, miR-28b, miR-29b-1-5p, miR-29b-1-5p, miR-107, miR-106b-3p, miR-193a-3p, miR-214-3p, miR-21-3p, miR-17-3p, miR-2330-3p, miR-345-3p, miR-129-2-3p, miR-345-5p, miR-143-3p, miR-29a-5p, miR-361-3p, miR-217, miR-3969, miR-19b-1-5p, miR-196a-3p, miR-2484, miR-452-3p, miR-129-1-3p, miR-203-3p, miR-217-5p, miR-3591-5p, miR-345-5p, miR-345-5p

NME2

ENSOARGO(NME/NM23

DOCK2

ENSOARGO(dedicato

BAG3

ENSOARGO(BCL2-ass,

miR-100-3p, miR-144-5p, miR-16-5p, miR-1248, miR-20b-5p, miR-329a, miR-345-5p, miR-23b, miR-200a-5p, miR-93-5p, miR-30e-5p, miR-133c, miR-3959-5p, miR-331-5p, novel\_127, miR-152-3p, miR-3071-3p, miR-30f, miR-125a-3p, miR-664-3p, miR-8117, miR-205-5p, miR-2285b, miR-2284y, miR-29a-5p, miR-450b-5p, miR-30c, miR-330-5p, miR-1343-5p, novel\_121, miR-2284z, miR-758-5p, miR-322-5p, miR-9-5p, novel\_79, miR-429-3p, miR-299a-3p, miR-6123, miR-6119-3p, miR-4324, miR-199b-5p, miR-301b-3p, miR-1839-3p, miR-378f, miR-2319a, miR-216a-3p, miR-3591-3p, miR-150-5p, miR-148a-3p, miR-181b-3p, miR-144-3p, miR-677, miR-669, miR-299b-3p, miR-374c-3p, miR-3120-3p, miR-26b-5p, miR-3074-5p, miR-378a-5p, miR-2411-3p, miR-2285v, miR-582, miR-7-5p, let-7j, let-7f-2-3p, let-7f-2-3p, miR-380-5p, miR-497-5p, miR-16-1-3p, miR-16b, novel\_23, miR-7b-5p, miR-223-3p, miR-3431, miR-412-5p, miR-339-5p, miR-103a-3p, miR-31-5p, miR-130b-5p, miR-454-3p, miR-190a-5p, miR-151-3p, miR-2285j, miR-3184-5p, miR-346, miR-3074-5p, miR-186-5p, miR-339b, miR-345-5p, miR-30d-5p, miR-129b-3p, miR-2285c, miR-15b-5p, miR-10a, miR-301a-3p, miR-345-3p, miR-122-3p, miR-422a, miR-324-3p, miR-500a-5p, novel\_17, miR-26a-5p, miR-30b, miR-181b-1-3p, miR-376a-5p, miR-148a-5p, miR-2284u, miR-16-1-3p, novel\_73, miR-378a-3p, miR-30c-5p, miR-378i, miR-23c, miR-210-3p, miR-7859, miR-23b-3p, miR-106a, miR-18a-3p, miR-3968, novel\_82, miR-423-5p, miR-877-3p, miR-9-5p, miR-3956-3p, miR-668-5p, miR-3963, miR-96-5p, miR-378j, miR-1185-2-3p, miR-144-5p, miR-203-3p, miR-2285u, miR-2319b, miR-2284g, miR-139-5p, miR-103a-2-5p, miR-199b-5p, miR-130b-3p, miR-16b, miR-106b-5p, miR-199a-3p, miR-2310, miR-8485, miR-378d, miR-23a-3p, miR-101b-3p, miR-124a, miR-1388-3p, miR-1839-5p, miR-1388-5p, miR-362-3p, miR-541, miR-329-3p, miR-1185-3p, miR-2459, miR-148b-5p, miR-455-

miR-204-5p, miR-134-5p, miR-592, miR-191-5p, miR-125b-5p, miR-135a-5p, miR-370-5p, miR-323-3p, miR-193a-5p, miR-3607-3p, miR-103b, novel\_48, miR-7144-5p, miR-3074-1-3p, miR-1248, miR-671-5p, miR-137-3p, miR-331-5p, miR-300-3p, miR-3965, miR-370-3p, miR-125a, miR-215-5p, miR-487a-3p, miR-874-3p, miR-107, miR-181b-5p, miR-6536, miR-30f, miR-339a, miR-2285af, miR-664-3p, miR-29a-5p, miR-2284y, miR-192-3p, miR-2284a, miR-1271-3p, miR-2385-3p, miR-30a-3p, miR-29b-2-5p, miR-4286, miR-411-3p, miR-330-5p, miR-345-3p, miR-3591-5p, miR-134, miR-1290, miR-134-5p, miR-450a-1-3p, novel\_121, miR-505-5p, miR-6516-5p, miR-483-3p, novel\_79, miR-412, miR-431, miR-222, miR-6517, miR-199c, miR-6119-3p, novel\_1, miR-379-3p, miR-4324, miR-6529b, miR-326-3p, miR-211, miR-2285x, miR-1193, novel\_120, miR-135b-5p, miR-107, miR-19a-3p, miR-3970, miR-3065-5p, miR-21c, miR-378b, miR-411b-3p, miR-7-1-3p, miR-329-5p, miR-216b-3p, miR-125a-5p, miR-466f-3p, miR-483-3p, miR-2285l, miR-194a, miR-455-5p, miR-2411-3p, miR-377-3p, miR-2285r, miR-130b-5p, miR-455-5p, miR-380-3p, miR-21-5p, miR-2284ab, miR-219a-1-3p, miR-450c-3p, miR-194-5p, miR-653, miR-181a-5p, miR-103, miR-339-5p, miR-26b-3p, miR-103a-3p, miR-208b-5p, miR-130b-5p, miR-487b-5p, miR-30a-3p, miR-665, miR-3604, miR-222-3p, miR-30e-3p, miR-181c-5p, miR-338-3p, miR-142a-5p, miR-3074-2-3p, miR-186-5p, novel\_99, miR-154b-3p, miR-339b, miR-411, miR-6516, miR-377-3p, miR-192-5p, miR-216b-5p, miR-139-5p, miR-154a-3p, miR-370-5p, miR-532-5p, miR-545-3p, miR-466i-5p, miR-324-3p, miR-345-3p, miR-125b, miR-2285p, miR-2424, miR-29b-1-5p, miR-664b-3p, miR-216c-5p, miR-329a-5p, miR-2285w, miR-487a, miR-218-1-3p, miR-2284u, miR-33b-3p, miR-19b-3p, miR-124-3p, miR-140-3p, miR-191, miR-215-5p, miR-1246, miR-2300b-3p, miR-2266, miR-2284b, miR-2408, miR-199b-5p, miR-210-3p, miR-199a-5p, miR-199b-5p, miR-199a-5p, miR-199b-5p

LEMD3 ENSOARGO( LEM doma miR-1197-3p, miR-28b, miR-28c, miR-382-3p, miR-2447, miR-326-3p, miR-361-3p, miR-320e, miR-2433, miR-4492, miR-486b-3p, miR-4726-5p, miR-664a, miR-320b, miR-204-3p, miR-6535, miR-377-3p, miR-18a-3p, miR-378b, miR-485-5p, miR-339b, miR-363-5p, miR-4286, miR-8485, miR-486-3p, miR-29b-1-5p, miR-29b-1-5p, miR-339a, novel\_51, miR-7-5p, miR-326, miR-377-3p, miR-1343-5p, novel\_127, miR-2898, miR-339-5p, novel\_79, miR-212-5p, miR-18a-3p, novel\_78, miR-9788-3p, miR-95-3p, miR-185-5p, miR-7857, miR-1343-5p, miR-330-5p, miR-5703, miR-484, miR-7b-5p, miR-378d, miR-744-5p, novel\_23, miR-329a-5p, miR-1434-3p, miR-329-5p, miR-2284z, miR-2284aa, miR-450b-5p

AGT ENSOARGO( angioten

SRL ENSOARGO( sarcalum

NDUFA3 ENSOARGO( NADH deh

AP3M2 ENSOARGO( adaptor-

miR-432-3p, miR-432-3p, let-7a-2-3p, miR-668-3p, miR-378a-5p, miR-483-3p, miR-377-3p, miR-105-5p, miR-365b-5p, novel\_51, miR-412-5p, miR-3431, miR-134-3p, miR-16b, miR-16-1-3p, miR-497-5p, miR-27b-3p, miR-2284x, miR-432, miR-19b-2-5p, miR-1843b-5p, miR-223-3p, miR-450c-3p, novel\_23, miR-301b-3p, miR-29c-3p, miR-29a, miR-1247-3p, miR-144-3p, miR-6535, miR-148a-3p, miR-1306, miR-148b-5p, miR-200a, miR-29a-5p, miR-6536, novel\_96, miR-152-3p, miR-205-5p, miR-125a-3p, miR-322-5p, miR-9-5p, miR-450a-1-3p, miR-134-5p, miR-129-1-3p, novel\_121, miR-486-5p, miR-155-5p, miR-1290, miR-23b-5p, novel\_42, miR-16-5p, miR-144-5p, miR-134-5p, miR-2284k, miR-133c, miR-3068-3p, miR-2355-5p, miR-2285aa, miR-1271, miR-876-3p, miR-329a, miR-301, miR-2310, miR-491-5p, miR-130b-3p, miR-103a-2-5p, miR-29b-1-5p, miR-16b, miR-147a, miR-148b-5p, miR-421, miR-1343-3p, miR-362-3p, miR-101c, miR-329-3p, miR-501-3p, miR-758-3p, novel\_111, miR-423-5p, miR-9-5p, miR-2284j, miR-3968, miR-628-3p, miR-218-5p, miR-2440, miR-3596, miR-378g, miR-25, miR-203-3p, miR-144-5p, miR-4443, miR-500-3p, miR-504, miR-668-5p, miR-136-5p, miR-335-3p, miR-9-3p, miR-378j, miR-486-3p, miR-143-3p, miR-202-5p, miR-324-3p, miR-92a-1-5p, miR-1247-5p, miR-328-3p, miR-493-3p, miR-33b-3p, miR-16-1-3p, miR-361-5p, miR-148a-5p, miR-142a-5p, miR-224-5p, miR-3184-5p, miR-129-2-3p, novel\_74, miR-487b-5p, miR-500, miR-4492, miR-454-3p, miR-129-5p, miR-874-5p, miR-130b-5p, miR-301a-3p, miR-377-3p, miR-15b-5p, miR-151b, miR-504-5p, miR-552-3p, miR-625-5p, miR-186-5p, miR-450a-1-3p, miR-500a-3p, miR-129b-3p, miR-487b-5p, miR-130b-5p, miR-363-5p, miR-382, miR-452-5p, miR-660, miR-224-5p, miR-197-5p, miR-432-5p, miR-185-5p, miR-6238, miR-544b, miR-133b-5p, miR-130a-3p, miR-29b, miR-30b-3p, miR-219a-1-3p, miR-786g, miR-873a-5p, miR-374b-3p, miR-3071-5p, miR-96-5p, novel\_48, miR-135b-5p, miR-331-5p, miR-3613-5p, miR-331-5p, miR-34c-5p, miR-769, novel\_69, miR-3965, miR-34b, miR-216b-3p, miR-541-5p, miR-532-5p, miR-1271, miR-331-5p, miR-669a-3p, miR-486b-3p, miR-135a-1-3p, miR-769-5p, miR-34c, miR-331-3p, miR-2285y, miR-135a-5p, miR-301a-5p, miR-142a-5p, miR-769-5p, miR-1197-3p, miR-8095, miR-449a, miR-1271, miR-425-5p, miR-214, miR-34a-5p, miR-2408, miR-301b-5p, miR-487a-3p, miR-1271-5p, miR-142-5p, miR-2284h-5p, novel\_121, miR-2285ad, miR-409b, miR-548w, miR-485-3p, miR-2898, miR-34b-5p, miR-214-3p, miR-125a-3p, miR-500a-5p, miR-125b-2-3p, miR-486-3p, miR-539-3p, miR-376c-5p, miR-2432, miR-376b-5p, miR-2285w, miR-382-3p, miR-652-5p

miR-660-5p, miR-378a-3p, miR-2331-3p, miR-182-5p, miR-370-5p, miR-21-3p, miR-377-3p, miR-301a-3p, miR-15b-5p, novel\_32, miR-2285c, miR-655, miR-433-3p, miR-1827, novel\_99, miR-378c, miR-214, miR-1271, miR-2285j, miR-655-3p, miR-219b-3p, miR-17-3p, miR-424-5p, miR-454-3p, miR-485-3p, miR-15a-5p, miR-487a-3p, miR-532-3p, miR-362-3p, miR-378i, miR-5703, miR-378a-3p, miR-2904, miR-19b-3p, miR-378d, miR-34a-5p, miR-345-3p, miR-181b-1-3p, miR-143-3p, miR-486-3p, miR-422a, miR-500a-5p, miR-760-3p, miR-34b-5p, miR-664b, miR-7977, miR-3596, miR-378e, miR-27a-3p, miR-199b-5p, miR-378j, miR-136-5p, miR-96-5p, miR-181a-3p, miR-877-3p, miR-493-5p, miR-885-5p, miR-541-3p, miR-452-5p, miR-219a-2-3p, miR-3968, miR-105-1, miR-2300a-5p, novel\_4, miR-330-3p, miR-27a-3p, miR-181b-2-3p, miR-2285e, miR-9788-3p, miR-541, miR-484, miR-296-5p, miR-329-3p, miR-378b, miR-758-3p, miR-323b, miR-378c, miR-362-3p, miR-3120-5p, miR-101c, miR-424-5p, miR-382-3p, miR-1388-3p, miR-33a-5p, miR-378d, miR-758-3p, miR-8485, miR-1306-5p, miR-16b, miR-182-5p, miR-505, miR-362-3p, miR-323b-3p, miR-130b-3p, miR-3955-3p, miR-491-5p, miR-214-3p, miR-199b-5p, miR-374c-3p, miR-34c-5p, miR-154b-5p, miR-199a-5p, miR-3154, miR-2318, miR-329a, miR-1248, miR-1306-5p, miR-16-5p, miR-1260b, miR-378c, miR-181c-3p, miR-370-5p, miR-135a-1-3p, miR-29b-3p, miR-138-5p, miR-486b-3p, miR-483-3p, miR-378h, miR-1271-5p, miR-505-5p, miR-322-5p, miR-1290, miR-2427, miR-29d-3p, miR-1343-5p, miR-105-2, miR-4286, miR-495-5p, miR-199a-5p, miR-219-3p, miR-664-3p, miR-1260a, miR-181c-3p, miR-17-3p, novel\_96, miR-378b, novel\_68, miR-7-1-3p, miR-34b, miR-374c-3p, miR-29a-3p, miR-181b-3p, miR-677, miR-3591-3p, miR-3065-5p, miR-150-5p, miR-1306, miR-19a-3p, miR-195a-5p, miR-378f, miR-29c-3p, miR-1193, miR-17-3p, miR-371b-3p, miR-301b-3p, miR-199b, miR-486-3p, miR-1271-3p, miR-3064-5p, miR-4286, miR-221-5p, miR-324-3p, miR-125b, miR-1260a, miR-210-5p, miR-532-3p, miR-486-5p, miR-412, miR-431, miR-6517, miR-128-3p, miR-378d, miR-33b-3p, miR-29d-3p, miR-188-3p, miR-615-3p, miR-1260b, miR-193a-5p, miR-103b, novel\_42, miR-4510, miR-708-5p, miR-874-5p, miR-4492, miR-28-5p, miR-486b-3p, miR-125b-5p, miR-664a-5p, miR-29b-3p, miR-370-5p, miR-2332, miR-22-3p, miR-154b-5p, miR-6130, miR-193b-3p, miR-2355-5p, miR-370-5p, miR-125a, miR-2331-3p, miR-221-5p, miR-548o-3p, miR-1895, miR-382, miR-125a-5p, miR-103a-2-5p, miR-193a-3p, miR-3085-3p, miR-431-5p, miR-1306-5p, miR-194-3p, miR-1185-3p, miR-3431, miR-134-3p, novel\_4, miR-1343-3p, miR-2300a-5p, miR-29b, miR-30b-3p, miR-1260b, miR-412-3p, miR-22-3p, miR-197-3p, miR-7857, miR-30b-3p, miR-296-5p, miR-2284r, miR-542-3p, miR-541, miR-877-3p, miR-371b-3p, miR-193b-3p, miR-1193, miR-29c-3p, miR-541-3p, miR-128-1-5p, miR-29a, miR-107-5p, miR-382-5p, miR-615, miR-1185-2-3p, miR-25, miR-7857-3p, miR-378g, miR-29a-3p, miR-7977, miR-3064-5p, miR-877-3p, miR-1306, miR-216a-3p, miR-361-3p

|          |                   |                                                                                                                                                                                                                                                                                                                                                                                                                                                                                                                                                                                                                                                                                                                                                                                                                                                       |
|----------|-------------------|-------------------------------------------------------------------------------------------------------------------------------------------------------------------------------------------------------------------------------------------------------------------------------------------------------------------------------------------------------------------------------------------------------------------------------------------------------------------------------------------------------------------------------------------------------------------------------------------------------------------------------------------------------------------------------------------------------------------------------------------------------------------------------------------------------------------------------------------------------|
|          |                   | miR-499b-5p, miR-2284g, miR-154b-5p, miR-4443, miR-151b, miR-132-5p, miR-485-5p, miR-1827, miR-3957-3p, miR-2284j, miR-665-5p, miR-2284v, miR-3184-5p, miR-423-5p, miR-2428, novel_111, miR-1260b, miR-1307-5p, miR-132-5p, miR-2284k, miR-133a-5p, miR-147-5p, miR-664a, miR-429-3p, miR-151-5p, miR-2284d, miR-1298-3p, miR-200b, miR-30b-3p, miR-3591-5p, miR-200b-3p, miR-2284x, miR-7862, miR-2284u, miR-30b-3p, miR-1260b, miR-363-5p, miR-2284b, let-7j, miR-2284y, miR-4532, miR-2284a, miR-654-3p, miR-1260a, miR-200c, miR-106b-3p, miR-2898, miR-2284m, miR-760-3p, miR-200c-3p, miR-191-3p                                                                                                                                                                                                                                                |
| GALNT2   | ENSOARGO(polypept |                                                                                                                                                                                                                                                                                                                                                                                                                                                                                                                                                                                                                                                                                                                                                                                                                                                       |
| PGBD5    | ENSOARGO(piggyBac | miR-431-3p, miR-505, miR-381-5p, miR-381-5p, miR-1b-3p, novel_42, miR-2411, miR-2411-5p                                                                                                                                                                                                                                                                                                                                                                                                                                                                                                                                                                                                                                                                                                                                                               |
|          |                   | miR-1291, miR-412-3p, miR-1895, miR-1983, miR-378f, miR-361-3p, miR-378e, novel_69, miR-154b-5p, miR-378a-3p, miR-378b, miR-2355-5p, miR-7977, miR-1271, miR-2433, miR-5100, miR-615, miR-28c, miR-665, novel_111, miR-1260b, miR-1197-3p, miR-1285-5p, miR-378c, miR-378c, novel_60, novel_42, miR-145a-3p, miR-3956-3p, miR-378c, miR-1260b, miR-33b-3p, miR-615-3p, miR-378b, miR-484, miR-378i, miR-378a-3p, miR-505-5p, miR-185-5p, miR-378h, miR-194-3p, miR-149-5p, miR-2459, novel_78, novel_4, miR-1343-3p, miR-760-3p, miR-1260a, miR-324-3p, miR-422a, miR-28b, miR-378d, miR-376c-5p, novel_39, miR-2432, miR-376b-5p, miR-1271-3p, miR-574-3p, novel_82, miR-140-5p, miR-101-3p, miR-30c-2-3p, miR-5703, miR-147-5p, miR-135a-2-3p, miR-140-5p, miR-30c-1-3p, miR-129-2-3p, miR-345-3p, miR-665-5p, miR-30c-1-3p, miR-129-1-3p, miR-6134 |
| ADAMTSL2 | ENSOARGO(ADAMTS-1 |                                                                                                                                                                                                                                                                                                                                                                                                                                                                                                                                                                                                                                                                                                                                                                                                                                                       |
| PLAT     | ENSOARGO(plasmino |                                                                                                                                                                                                                                                                                                                                                                                                                                                                                                                                                                                                                                                                                                                                                                                                                                                       |



miR-378d, miR-5703, miR-362-3p, novel\_133, novel\_83, miR-199a-3p, miR-505-3p, miR-3600, miR-548e-3p, miR-21-3p, miR-30b-3p, miR-760-3p, miR-185-3p, miR-216a-5p, miR-2411, miR-216c-5p, let-7g-3p, miR-27b-5p, miR-21a-3p, miR-155-5p, miR-22-3p, miR-6130, miR-323-5p, miR-6516, miR-27a-5p, miR-3065-3p, miR-487a-5p, miR-155-5p, miR-338-5p, miR-324-3p, let-7b-5p, miR-4510, miR-3120-5p, miR-450b-5p, miR-2426, miR-484, miR-500-5p, miR-9788-3p, miR-222-5p, miR-27a-3p, let-7e, miR-3955-3p, miR-3085-3p, miR-362-3p, novel\_103, miR-193a, miR-30c-1-3p, miR-376b, miR-494-3p, let-7a-5p, miR-877-3p, miR-27a-3p, miR-454-5p, let-7d-5p, miR-7977, miR-541-5p, miR-499b-5p, miR-10b, miR-664b, miR-3064-5p, miR-2284q, miR-2285t, miR-335, miR-769-5p, miR-8095, miR-362-5p, miR-541-3p, miR-3059-5p, let-7a-2-3p, miR-300, let-7d, miR-582-3p, miR-30a-5p, miR-29d-3p, miR-214-5p, miR-545-5p, miR-2411-5p, miR-6516-5p, miR-7641, miR-423-3p, miR-92a-3p, let-7c-5p, miR-30c-2-3p, miR-490-3p, miR-3065-3p, miR-28b, miR-30a-3p, miR-495-5p, miR-2385-3p, miR-7144-5p, novel\_91, let-7g-3p, miR-362-5p, miR-503-3p, miR-381-3p, miR-769, miR-141-3p, miR-370-3p, miR-486b-3p, miR-204-5p, miR-29b-3p, miR-410-5p, miR-145-3p, miR-500b-5p, miR-103b, miR-6128, miR-7862, miR-29b, miR-374b-3p, let-7g-5p, miR-665, miR-124-5p, miR-197-5p, miR-296-3p, miR-505-3p, miR-1291, miR-18a-3p, miR-29a-3p, miR-323a-5p, miR-2404, miR-147-5p, miR-199c, miR-656-5p, novel\_1, miR-92a-3p, let-7i, miR-6402, miR-24-3p, miR-211, miR-2285x, miR-148a-5p, miR-16-1-3p, miR-493-3p, miR-1961, miR-2366, miR-7859, miR-30d-3p, miR-380-5p, miR-18a-3p, let-7k, miR-98-5p, miR-202-5p, miR-324-3p, miR-2285p, novel\_17, miR-486-3p, miR-376c-3p, miR-181b-1-3p, miR-345-3p, miR-195a-3p, miR-186-5p, miR-543-3p, miR-625-5p, miR-433-3p, miR-30d-5p, miR-500a-3p, let-7i-5p, miR-2284c, miR-376a-3p, miR-552-3p, miR-2331-3p, miR-

miR-199a-5p, novel\_39, miR-306b-3p, miR-192-3p, miR-3064-5p, miR-29b-2-5p, miR-4286, miR-2898, novel\_96, miR-543-5p, miR-92a-3p, novel\_127, miR-2285af, miR-8117, miR-30c-2-3p, miR-486-5p, miR-129-1-3p, miR-1224-5p, miR-23b-5p, miR-1306-5p, novel\_42, miR-204-5p, miR-100-3p, miR-25-3p, miR-3959-5p, miR-199a-5p, miR-370-3p, miR-615-5p, miR-329a, miR-345-5p, miR-7144-5p, miR-23a-5p, miR-301, miR-137-3p, miR-345-5p, miR-130b-5p, miR-6240, miR-493-5p, miR-363-5p, miR-124-5p, miR-466f-3p, miR-7-5p, miR-330-3p, miR-32, miR-197-5p, miR-105-5p, miR-134-3p, miR-3431, novel\_116, miR-2355-3p, miR-4508, miR-7b-5p, miR-431-3p, miR-22-3p, miR-145a-5p, miR-211, miR-24-3p, miR-371b-3p, miR-199b-5p, miR-92a-3p, miR-147-5p, miR-4324, miR-133a-5p, miR-146b-3p, miR-378b, miR-3120-3p, miR-450b-3p, miR-412-3p, miR-7975, miR-6395, miR-379-5p, miR-1306, miR-3970, miR-3065-5p, miR-18a-3p, miR-376a-5p, miR-2424, miR-760-3p, miR-324-3p, miR-185-3p, miR-328-3p, miR-18a-3p, miR-212-5p, novel\_133, miR-362-3p, miR-124-3p, miR-5703, miR-3184-5p, miR-6134, miR-129-2-3p, novel\_74, miR-664a, miR-500, miR-129-5p, miR-4492, miR-130b-5p, miR-324-3p, miR-29b-2-5p, miR-664a-5p, miR-665, novel\_25, miR-22-3p, miR-204-3p, miR-2331-3p, miR-30c-1-3p, miR-32-5p, miR-504-5p, miR-3065-3p, let-7g-3p, miR-345-5p, miR-21a-3p, miR-500a-3p, miR-30c-1-3p, miR-4532, miR-124a, miR-2330-5p, miR-3085-3p, novel\_124, miR-491-5p, miR-199b-5p, miR-1306-5p, miR-362-3p, miR-1298-3p, miR-9788-3p, novel\_78, miR-105-1, miR-1343-3p, miR-330-3p, miR-145b, miR-362-3p, miR-1839-5p, miR-6529a, miR-329-3p, miR-361-3p, miR-423-5p, miR-3059-5p, novel\_60, miR-2447, miR-363-3p, miR-3956-3p, miR-1296-5p, miR-4726-5p, miR-2440, miR-3596, miR-378g, miR-2483-3p, miR-203-3p, miR-4443, miR-3064-5p, miR-211-5p, miR-504, miR-193-5p, miR-1983, miR-361-3p, miR-

MPP1 ENSOARGO(membrane

miR-211, miR-371b-3p, miR-24-3p, miR-449a, miR-326-3p, miR-2428, miR-17-3p, novel\_101, miR-29c-3p, miR-128-1-5p, miR-29a, miR-4324, miR-502-5p, miR-34c, miR-382-5p, miR-2404, miR-323a-5p, miR-29a-3p, miR-34b, miR-677, miR-669, novel\_68, miR-3074-5p, miR-329-5p, miR-655-5p, miR-2284e, miR-376a-2-5p, miR-2387, miR-1306, miR-378b, miR-18a-3p, miR-539-3p, miR-345-5p, miR-130b-5p, miR-668-3p, miR-363-5p, miR-628-5p, miR-378a-5p, miR-483-3p, miR-466f-3p, miR-7-5p, miR-503-5p, miR-377-3p, miR-2285v, miR-197-5p, novel\_51, miR-503-5p, miR-134-3p, miR-185-5p, miR-3431, miR-149-5p, miR-194-3p, miR-3955-5p, miR-187-3p, miR-29b, miR-21-5p, miR-1260b, miR-188-5p, miR-873a-5p, miR-7b-5p, miR-450c-3p, miR-22-3p, miR-1260b, novel\_9, miR-486b-3p, miR-28-5p, miR-204-5p, miR-592, miR-410-5p, miR-29b-3p, miR-5100, miR-6740-5p, miR-331-3p, miR-34c-5p, miR-300-3p, miR-154b-5p, miR-487a-3p, miR-874-3p, miR-2355-5p, miR-876-3p, miR-345-5p, miR-329b, miR-7144-5p, miR-671-5p, miR-485-5p, miR-1814c, miR-3154, miR-3065-3p, novel\_39, miR-3064-5p, miR-17-3p, miR-2898, novel\_127, miR-1260a, miR-125a-3p, miR-3071-3p, miR-483-3p, miR-450a-1-3p, miR-545-5p, miR-6517, miR-1224-5p, miR-376a-5p, miR-3591-5p, miR-29d-3p, miR-330-5p, miR-877-3p, miR-8095, miR-2447, let-7i-3p, miR-2285t, miR-154-3p, miR-218-5p, miR-301a-5p, miR-378g, miR-7857-3p, miR-3082-5p, miR-4792, miR-139-5p, miR-3064-5p, miR-452-3p, miR-499b-5p, miR-7689-3p, miR-541-5p, miR-211-5p, miR-3963, miR-668-5p, miR-504, miR-877-3p, miR-361-3p, miR-378j, miR-2310, miR-376b, miR-3085-3p, miR-487b-5p, miR-153-3p, miR-1468, miR-214-3p, novel\_103, miR-326, miR-1306-5p, miR-29b-1-5p, miR-153, miR-1298-3p, miR-147a, miR-9788-3p, miR-455-3p, miR-421, novel\_78, miR-1343-3p, miR-2300a-5p, miR-5010-3p, miR-181b-2-3p, miR-1388-5p, miR-2426, miR-2284r, miR-301b-5p, miR-122-5p, miR-530a, miR-503-3p, miR-491-3p, miR-432-3p, miR-628-5p, miR-363-5p, miR-382, miR-6240, miR-3085-3p, miR-491-5p, miR-330-3p, miR-3141, miR-2355-3p, miR-134-3p, miR-185-5p, miR-432-5p, miR-330-3p, miR-122-3p, miR-4508, miR-1260b, miR-30b-3p, miR-30b-3p, miR-501-3p, miR-197-3p, miR-412-3p, miR-432, miR-484, miR-502-3p, miR-361-3p, miR-3956-3p, novel\_60, miR-6123, miR-656-5p, miR-22-5p, miR-3968, miR-6402, miR-218-5p, miR-4443, miR-500-3p, miR-378g, miR-3064-5p, miR-18a-3p, miR-409-5p, miR-3141, miR-361-3p, miR-1271-3p, miR-486-3p, miR-3064-5p, novel\_127, novel\_96, miR-191-3p, miR-450a-2-3p, miR-185-3p, miR-122-3p, miR-219b-5p, miR-1260a, miR-1247-5p, miR-532-3p, miR-196a-2-3p, miR-412, miR-18a-3p, miR-378d, miR-501-3p, miR-1197-5p, miR-1260b, miR-6525, miR-4510, miR-486b-3p, miR-331-5p, miR-324-3p, miR-331-3p, miR-2433, miR-6130, miR-1271, miR-2355-5p, miR-370-3p, miR-874-3p, miR-3068-3p, miR-2474, miR-331-5p, miR-371b-3p, miR-181d-5p, miR-33a-5p, miR-668-3p, novel\_1, miR-181b-5p, miR-320d, miR-320b, miR-345-3p, miR-3604, miR-2411-3p, miR-340-5p, miR-320c, novel\_116, novel\_78, miR-548e-3p, miR-4429, miR-671-5p, miR-7975, miR-3578, miR-345-3p, miR-708-3p, miR-125b-2-3p, miR-320a

FOXI1 ENSOARGO( forkhead

LMAN1L ENSOARGO( lectin,

PUS7 ENSOARGO( pseudour

miR-330-3p, miR-2411-3p, miR-224-5p, miR-377-3p, miR-1343-5p, miR-125a-5p, miR-363-5p, miR-668-3p, miR-130b-5p, miR-6240, miR-539-3p, miR-3071-5p, miR-708-3p, miR-1434-3p, miR-1285, miR-542-3p, miR-1843b-5p, miR-26a-2-3p, miR-497-5p, miR-188-5p, miR-380-3p, miR-16b, miR-16-1-3p, miR-130a-3p, miR-339-5p, miR-103a-3p, miR-2355-3p, miR-103, miR-3535, miR-2285g, miR-3431, miR-16a, miR-382-5p, miR-15a, miR-28c, miR-142b, miR-576-3p, novel\_1, miR-495-3p, novel\_101, miR-17-3p, miR-135a-2-3p, miR-342-3p, novel\_27, miR-301b-3p, miR-211, miR-323c, miR-18a-3p, miR-376b-3p, miR-376b-5p, miR-18b, miR-195a-5p, miR-505-3p, miR-6516-3p, miR-1291, miR-107, miR-10a-5p, miR-3120-3p, miR-7-1-3p, miR-144-3p, miR-411b-3p, miR-3071-3p, miR-339a, miR-376b-3p, miR-219-3p, miR-200c, miR-6119-5p, miR-107, miR-200a-3p, novel\_127, miR-450a-2-3p, miR-17-3p, miR-6536, miR-200c-3p, miR-30a-3p, miR-200a, miR-28b, miR-1343-5p, miR-345-3p, miR-200b-3p, miR-496, miR-10a-5p, novel\_79, miR-412, miR-18b-5p, miR-222, miR-429-3p, miR-545-5p, miR-322-5p, miR-2411-5p, miR-144, miR-6740-5p, miR-125b-5p, miR-409-3p, miR-3969, miR-204-5p, miR-767-5p, novel\_9, miR-16-5p, miR-320a, miR-18a, miR-376c-5p, miR-671-5p, miR-10b-3p, miR-767, miR-2318, miR-2285aa, miR-125a, miR-141-3p, miR-874-3p, miR-503-3p, miR-154b-5p, miR-365a-3p, miR-16b, miR-342, miR-320b, miR-214-3p, miR-130b-3p, miR-101b-3p, miR-424-5p, miR-3187-3p, miR-412-3p, miR-125b-2-3p, miR-484, miR-4791, miR-10b, miR-101c, miR-3120-5p, miR-1388-5p, miR-330-3p, novel\_78, miR-221-3p, miR-2285e, miR-421, miR-2459, miR-147a, miR-376b-3p, miR-1298-3p, miR-218-5p, miR-2440, miR-101-3p, miR-490-5p, miR-3968, miR-452-5p, miR-2447, miR-885-5p, miR-8095, miR-9-3p, miR-219a-2-3p, miR-221, miR-376a-3p, miR-9-3p, miR-499b-5p, miR-541-5p, miR-211-5p, miR-1792, miR-152-3p, miR-130b-5p, miR-6134, miR-2284w, miR-338-3p, miR-2285x, miR-625-5p, miR-2448-3p, miR-18a-3p, miR-3596, miR-6535, novel\_25, miR-491-5p, miR-450a-2-3p, miR-2898, novel\_96, novel\_127, miR-2285af, miR-196a-3p, miR-380-5p, miR-758-3p, miR-2285b, miR-380-5p, miR-130b-5p, miR-363-5p, miR-758-3p, miR-197-3p, miR-412-3p, miR-758-5p, miR-421, miR-2459, miR-18a-3p, miR-412

miR-486-5p, miR-450a-1-3p, miR-545-5p, miR-483-3p, miR-1271-5p, miR-302a-5p, miR-431, miR-6517, miR-429-3p, miR-222, miR-200b-3p, miR-128-3p, miR-300, miR-411-3p, miR-1343-5p, miR-2284a, miR-192-3p, miR-2284y, novel\_39, miR-28b, miR-450b-5p, miR-148b-5p, miR-24-2-5p, miR-30a-3p, miR-29b-2-5p, miR-152-3p, novel\_127, miR-181b-5p, miR-191-3p, miR-205-5p, miR-1260a, miR-324-5p, miR-223-5p, miR-215-5p, miR-370-3p, miR-574-5p, miR-485-5p, miR-23b, miR-381-3p, miR-1260b, miR-193a-5p, miR-486b-3p, miR-144, miR-370-5p, miR-194-3p, miR-149-5p, miR-134-3p, miR-185-5p, miR-3535, miR-26b-3p, miR-487b-3p, miR-130a-3p, miR-31-5p, miR-744-5p, miR-27b-3p, miR-1260b, miR-380-3p, miR-194-5p, miR-374b-3p, miR-450c-3p, miR-181a-5p, miR-708-3p, miR-19b-2-5p, miR-2285r, miR-1343-5p, miR-483-3p, miR-124-5p, miR-194a, miR-136-3p, miR-377-3p, miR-224-5p, miR-144-3p, novel\_69, miR-411b-3p, miR-3120-3p, miR-216b-3p, miR-329-5p, novel\_68, miR-6516-3p, miR-505-3p, miR-9851-3p, miR-2319a, miR-450b-3p, miR-3591-3p, miR-18a-3p, miR-216a-3p, miR-148a-3p, miR-301b-3p, miR-1307-3p, miR-3959-3p, miR-495-3p, miR-1193, miR-2285x, miR-342-3p, miR-199c, miR-379-3p, novel\_1, miR-6119-3p, miR-128-1-5p, novel\_87, miR-33a-3p, miR-576-3p, miR-28c, miR-142b, miR-2284h-5p, miR-148b-3p, miR-200b, miR-23c, miR-7859, miR-23b-3p, miR-505-3p, miR-18a-3p, let-7a-3p, miR-378d, miR-148a-5p, miR-33b-3p, miR-140-3p, miR-188-3p, miR-2904, miR-98-3p, miR-215-5p, miR-2300b-3p, miR-380-3p, miR-143-3p, miR-486-3p, miR-2285w, miR-329a-5p, miR-216c-5p, miR-760-3p, miR-122-3p, miR-6130, miR-656-3p, miR-192-5p, miR-544-3p, miR-301a-3p, miR-377-3p, miR-370-5p, miR-216b-3p, miR-21-3p, miR-2331-3p, miR-504-5p, miR-625-5p, miR-2312, miR-411, miR-500a-3p, miR-27b-5p, let-7f-1-3p, miR-450a-1-3p, miR-21a-3p, miR-338-3p, miR-181c-5p, miR-3184-5p, miR-122-5p, miR-98-3p, miR-

miR-324-5p, miR-365a-3p, miR-34c-5p, miR-331-5p, miR-874-3p, miR-1248, miR-301, miR-488-3p, miR-381-3p, miR-1197-3p, miR-2284v, miR-1306-5p, miR-592, miR-6740-5p, miR-331-3p, miR-100-3p, miR-494-5p, novel\_63, miR-2284k, miR-214-5p, novel\_121, miR-582-3p, miR-450a-1-3p, miR-376a-5p, miR-429-3p, miR-6517, miR-155-5p, miR-200b-3p, miR-300, miR-330-5p, miR-2284a, miR-192-3p, miR-2284y, miR-4286, miR-152-3p, miR-200c-3p, miR-1a-2-5p, miR-127-5p, miR-450a-2-3p, miR-200c, miR-34b, miR-26b-5p, miR-655-5p, miR-379-5p, miR-376a-2-5p, miR-2319a, miR-412-3p, miR-1291, miR-450b-3p, miR-148a-3p, miR-2284w, novel\_27, miR-326-3p, miR-449a, miR-24-3p, miR-135a-2-3p, miR-203b-5p, novel\_1, novel\_87, miR-33a-3p, miR-34c, miR-6402, miR-142b, miR-133a-5p, miR-576-3p, miR-412-5p, miR-2355-3p, miR-194-3p, miR-134-3p, miR-432-5p, miR-2284d, miR-2284x, miR-26a-2-3p, miR-3071-5p, miR-450c-3p, miR-432, miR-6240, miR-466f-3p, miR-330-3p, miR-377-3p, miR-224-5p, miR-155-5p, miR-204-3p, miR-216b-5p, miR-377-3p, miR-27a-5p, miR-499b-3p, miR-532-5p, novel\_99, miR-1895, miR-487b-5p, miR-500a-3p, miR-450a-1-3p, let-7f-1-3p, miR-98-3p, miR-224-5p, miR-6525, miR-3074-2-3p, miR-500, miR-664a, miR-155-5p, miR-450b-3p, miR-3604, let-7b-3p, miR-2284h-5p, miR-200b, miR-148b-3p, miR-23c, miR-487a-3p, miR-23b-3p, miR-7859, miR-485-3p, miR-34a-5p, let-7a-3p, miR-98-3p, miR-143-3p, miR-2432, miR-142a-3p, miR-130a-5p, miR-29b-1-5p, miR-2285w, miR-21-3p, miR-34b-5p, miR-2284m, miR-500a-5p, miR-412-5p, miR-26a-5p, miR-3082-5p, miR-499a-3p, miR-378g, miR-2285u, miR-499b-5p, miR-452-3p, miR-2319b, miR-1983, miR-381-3p, miR-378j, miR-140-5p, miR-154a, miR-2284j, miR-452-5p, miR-212-3p, miR-3956-3p, miR-2447, novel\_60, miR-3964, novel\_82, miR-2285n, miR-411b-5p, miR-2459, miR-421, miR-216a-3p, miR-147a, miR-142-3p, miR-330-3p, novel\_78, miR-412, miR-504-5p, miR-15b-5p, miR-203-3p, miR-15a-5p, miR-322-5p, miR-412-3p, miR-195a-5p, miR-497-5p, miR-7144-5p, miR-504, miR-16b, miR-10b-3p, miR-345-3p, miR-16-5p, miR-424-5p, miR-16b, miR-16a, miR-15a, miR-21-3p, miR-424-5p

INPP5F ENSOARGO( inositol

CHORDC1 ENSOARGO( cysteine

novel\_1, miR-6402, miR-15a, miR-16a, miR-3959-3p, miR-24-3p, miR-211, miR-2428, novel\_27, miR-374c-5p, miR-135a-2-3p, miR-1193, miR-17-3p, miR-19a-3p, miR-195a-5p, miR-2319a, miR-2285ab, miR-3065-5p, miR-21c, miR-1306, miR-670-3p, miR-411b-3p, novel\_69, miR-181b-3p, miR-677, miR-320c, miR-6535, miR-3074-5p, novel\_68, miR-10a-5p, miR-7-1-3p, miR-106b-3p, miR-136-3p, miR-2411-3p, miR-22841, miR-432-3p, miR-432-3p, miR-345-5p, miR-16-1-3p, miR-219a-1-3p, miR-21-5p, miR-138, miR-30b-3p, miR-16b, miR-188-5p, miR-497-5p, miR-432, miR-708-3p, miR-374b-3p, miR-22-3p, miR-450c-3p, miR-134-3p, miR-432-5p, miR-2285g, miR-31-5p, miR-138-5p, miR-486b-3p, miR-204-5p, miR-28-5p, miR-370-5p, miR-494-5p, miR-1306-3p, miR-3969, miR-500b-5p, miR-145-3p, miR-28a-3p, miR-16-5p, miR-3607-3p, miR-345-5p, miR-10b-3p, miR-1814c, miR-671-5p, miR-1248, miR-7144-5p, miR-30e-5p, miR-320a, miR-362-5p, miR-3154, miR-769, miR-874-3p, miR-503-3p, miR-1271, miR-2285aa, miR-200c-3p, miR-28-3p, miR-17-3p, novel\_96, miR-181a-2-3p, miR-3064-5p, miR-582-3p, miR-10a-5p, miR-30c, miR-200b-3p, miR-345-3p, miR-9-5p, miR-322-5p, miR-450a-1-3p, miR-545-5p, miR-6517, miR-429-3p, miR-412, miR-2285t, miR-101-3p, novel\_82, miR-30b-5p, miR-218-5p, miR-301a-5p, miR-769-5p, miR-371a-5p, miR-362-5p, miR-154a, miR-9-5p, miR-2285f, miR-504, novel\_94, miR-9-3p, miR-1306-3p, miR-129b-5p, miR-2483-3p, miR-489, miR-499a-3p, miR-7857-3p, miR-378g, miR-4443, miR-10b, miR-3064-5p, miR-126b-5p, miR-211-5p, miR-3955-3p, miR-3085-3p, miR-491-5p, miR-214-3p, miR-1306-5p, novel\_115, miR-199a-3p, miR-320b, miR-182-5p, miR-16b, miR-2957, miR-2310, miR-8485, miR-424-5p, miR-1388-3p, miR-2426, miR-101c, miR-301b-5p, miR-10b, miR-2284r, miR-484, miR-125b-2-3p, miR-30b-3p, miR-412-3p, miR-1298-3p, miR-2459, miR-455-3p, miR-500-5p, miR-1343-3p, miR-2300a-5p, miR-

miR-6119-5p, miR-8117, miR-1260a, novel\_127, miR-3064-5p, miR-28b, miR-450c-5p, miR-200a, miR-3065-3p, miR-345-3p, miR-330-5p, miR-29d-3p, miR-300, miR-411-3p, miR-128-3p, miR-105-2, miR-6517, miR-1224-5p, miR-758-5p, miR-2411-5p, miR-378h, miR-302a-5p, miR-1306-3p, miR-5100, miR-29b-3p, miR-135a-5p, miR-28-5p, miR-486b-3p, miR-133a-3p, miR-3607-3p, miR-193a-5p, miR-1260b, miR-365a-5p, miR-378c, miR-381-3p, miR-200a-5p, miR-345-5p, miR-671-5p, miR-485-5p, miR-1248, miR-7144-5p, miR-1271, miR-2285aa, miR-370-3p, miR-365a-3p, miR-300-3p, miR-324-5p, miR-377-3p, miR-296-3p, miR-224-5p, miR-194a, miR-2411-3p, miR-365b-5p, miR-330-3p, miR-2285v, miR-105-5p, miR-193a-3p, miR-6240, miR-2285r, miR-345-5p, miR-296-3p, miR-1285, miR-145a-5p, novel\_23, miR-194-5p, miR-22-3p, miR-219a-1-3p, miR-1260b, miR-30b-3p, miR-29b, miR-27b-3p, miR-3955-5p, miR-26b-3p, miR-185-5p, miR-134-3p, miR-3431, miR-2285g, miR-149-5p, miR-28c, miR-1247-3p, miR-379-3p, miR-29a, miR-6119-3p, miR-22-5p, miR-29c-3p, miR-193b-3p, miR-3957-3p, miR-326-3p, novel\_27, miR-216a-3p, miR-18a-3p, miR-1306, miR-3970, miR-410-5p, miR-135b-5p, miR-378f, miR-7975, miR-3074-5p, novel\_68, novel\_69, miR-29a-3p, miR-323a-5p, miR-2404, miR-677, miR-345-3p, miR-422a, miR-324-3p, miR-216a-5p, miR-466i-5p, miR-760-3p, miR-21-3p, miR-3653-3p, miR-105-3p, miR-29b-1-5p, miR-486-3p, miR-2411, miR-2432, miR-2408, miR-378i, miR-1434-5p, miR-378a-3p, miR-140-3p, miR-124-3p, miR-133a-3p, miR-18a-3p, miR-3600, miR-340-5p, miR-2284h-5p, miR-2285j, miR-3604, miR-665, miR-151-3p, miR-664a, miR-874-5p, miR-708-5p, miR-3184-3p, miR-3074-5p, miR-378c, miR-3958-5p, miR-224-5p, miR-6525, miR-3184-5p, miR-129b-3p, miR-345-5p, miR-133b-3p, novel\_99, miR-1895, miR-140-5p, miR-378a-3p, miR-182-5p, miR-296-3p, miR-3065-3p, miR-193b-3p, miR-323-5p, miR-377-3p, miR-22-3p, miR-1306-5p, miR-326, miR-182-3p, miR-221-5p, miR-3085-3p, miR-760-3p, miR-324-3p, novel\_51, miR-455-5p, miR-185-3p, miR-339a, miR-1306-5p, miR-486-3p, miR-3065-3p, miR-1271-3p, miR-3064-5p, miR-4286, miR-2889, miR-3120-5p, miR-455-5p, miR-29b, miR-33b-3p, miR-7134-5p, miR-29d-3p, miR-188-3p, miR-296-5p, miR-215-5p, miR-149-5p, miR-532-3p, novel\_79, miR-339-5p, miR-340-3p, miR-3960, novel\_4, miR-1343-3p, miR-874-5p, miR-486b-3p, miR-29a, miR-664a, miR-2433, miR-29b-3p, miR-576-3p, miR-2428, miR-2903, miR-24-3p, miR-346, miR-665-5p, miR-29c-3p, novel\_60, novel\_42, miR-3956-3p, miR-1895, miR-1291, miR-339b, miR-1306, miR-3154, miR-361-3p, miR-192-5p, miR-29a-3p, miR-3065-3p, miR-341-3p, miR-615-5p, miR-215-5p, novel\_68, miR-221-5p, miR-3064-5p



|        |                    |                                                                                                                                                                                                                                                                                                                                                                                                                                                                                                                                                                                                                                                                                                                                                                                                                                                                                                                                                                                                                                                                                                                                                                                                                                                                                                                                                                                                                                                                                                 |
|--------|--------------------|-------------------------------------------------------------------------------------------------------------------------------------------------------------------------------------------------------------------------------------------------------------------------------------------------------------------------------------------------------------------------------------------------------------------------------------------------------------------------------------------------------------------------------------------------------------------------------------------------------------------------------------------------------------------------------------------------------------------------------------------------------------------------------------------------------------------------------------------------------------------------------------------------------------------------------------------------------------------------------------------------------------------------------------------------------------------------------------------------------------------------------------------------------------------------------------------------------------------------------------------------------------------------------------------------------------------------------------------------------------------------------------------------------------------------------------------------------------------------------------------------|
| CACFD1 | ENSOARGOC calcium  | <p>miR-10a-5p, miR-4792, miR-2319b, miR-677, miR-181b-3p, miR-378e, miR-299b-3p, miR-3591-3p, miR-361-3p, miR-378f, miR-1291, miR-504, miR-218-5p, miR-576-3p, miR-339-5p, miR-181b-2-3p, novel_78, miR-2459, miR-296-5p, miR-378b, miR-10b, miR-378c, miR-219a-1-3p, miR-668-3p, miR-378d, miR-432-3p, miR-29b-1-5p, miR-483-3p, miR-491-5p, miR-21-3p, miR-370-3p, miR-2355-5p, miR-552-3p, miR-615-5p, miR-504-5p, miR-378a-3p, miR-10a, miR-339b, miR-378c, miR-378c, miR-10b-5p, miR-331-3p, miR-665, miR-29b-2-5p, miR-2433, miR-708-5p, miR-874-5p, miR-28-5p, miR-486b-3p, novel_79, miR-299a-3p, miR-1247-5p, miR-483-3p, miR-378h, miR-378a-3p, miR-378i, miR-10a-5p, miR-29b-2-5p, miR-486-3p, miR-29b-1-5p, miR-324-3p, miR-339a, miR-422a, miR-125a-3p, miR-299-3p, novel_96</p> <p>miR-148a-5p, miR-27b-3p, miR-34a-5p, miR-4429, miR-2426, miR-1388-5p, miR-5703, miR-1246, novel_121, miR-221-3p, miR-148b-5p, miR-376b-3p, miR-487a-3p, miR-505-3p, miR-27a-3p, miR-485-3p, miR-222, miR-660, miR-34b-5p, miR-320d, novel_103, miR-205-5p, miR-376b-3p, miR-320b, miR-539-3p, miR-125b-2-3p, miR-505-3p, miR-376a-3p, miR-376b-3p, miR-320a, miR-221, miR-27a-3p, miR-376d, miR-320c, miR-203-3p, miR-34b, miR-769, miR-34c-5p, miR-3120-3p, miR-320b, miR-548o-3p, miR-660-5p, miR-329-5p, miR-20a-3p, miR-769-5p, miR-324-3p, miR-34c, miR-6740-5p, miR-2440, miR-15b-3p, miR-218-5p, miR-222-3p, miR-449a, miR-877-3p, miR-769-5p, miR-495-3p, miR-3059-5p, miR-219b-3p</p> |
| INA    | ENSOARGOC internex |                                                                                                                                                                                                                                                                                                                                                                                                                                                                                                                                                                                                                                                                                                                                                                                                                                                                                                                                                                                                                                                                                                                                                                                                                                                                                                                                                                                                                                                                                                 |

let-7e-5p, miR-639b, miR-379-5p, miR-1291, miR-412-3p, miR-1306, miR-216a-3p, miR-18a-3p, miR-6535, miR-669, miR-670-3p, miR-299b-3p, miR-320b, miR-216b-3p, miR-128-1-5p, miR-382-5p, let-7i, miR-425-5p, miR-28c, miR-326-3p, miR-2428, miR-24-3p, miR-3959-3p, miR-193b-3p, miR-17-3p, miR-542-5p, miR-135a-2-3p, miR-26a-2-3p, miR-4508, miR-27b-3p, miR-1260b, miR-381-5p, miR-194-5p, miR-873a-5p, miR-2113, miR-3535, let-7g-5p, miR-339-5p, miR-122-3p, miR-1343-5p, miR-466f-3p, miR-193a-3p, miR-197-5p, miR-194a, novel\_51, miR-377-3p, miR-345-5p, miR-654-3p, miR-363-5p, miR-485-5p, miR-345-5p, miR-2355-5p, miR-370-3p, miR-1271, miR-615-5p, miR-874-3p, miR-486b-3p, miR-331-3p, miR-2433, miR-1260b, miR-1197-3p, novel\_42, miR-128-3p, let-7d, miR-1343-5p, miR-330-5p, miR-1290, miR-3578, miR-582-3p, miR-505-5p, miR-196a-2-3p, novel\_79, miR-299a-3p, miR-6517, novel\_127, miR-543-5p, miR-450a-2-3p, miR-17-3p, miR-2898, let-7f-5p, miR-30c-2-3p, miR-339a, let-7c-5p, miR-1260a, miR-125a-3p, novel\_39, let-7g, miR-490-3p, miR-1271-3p, miR-28b, miR-3064-5p, miR-4286, miR-1983, miR-504, miR-668-5p, let-7d-5p, miR-454-5p, miR-27a-3p, miR-3596, miR-499a-3p, miR-7977, miR-3064-5p, miR-2319b, miR-20a-3p, miR-4726-5p, miR-423-5p, miR-194b-5p, miR-541-3p, miR-1839-5p, miR-7857, miR-2284r, miR-541, miR-4791, miR-1298-5p, miR-9788-3p, miR-2459, miR-496-5p, miR-27a-3p, miR-2300a-5p, miR-1343-3p, miR-381-5p, miR-214-3p, miR-542-5p, let-7e, miR-3085-3p, miR-3955-3p, miR-1306-5p, miR-326, miR-8485, miR-491-3p, miR-30c-1-3p, let-7a-5p, miR-1388-3p, miR-2330-5p, miR-625-5p, miR-1827, miR-345-5p, miR-339b, miR-129b-3p, miR-411, miR-877-5p, let-7i-5p, miR-151b, miR-499b-3p, miR-377-3p, miR-6130, miR-193b-3p, miR-552-3p, miR-2331-3p, miR-30c-1-3p, miR-504-5p, miR-4492, miR-874-5p, miR-17-3p, miR-664a, miR-132-5p, let-7f, miR-3184-5p, let-

HK3 ENSOARGO(hexokina

miR-433-3p, novel\_25, miR-22-3p, miR-204-3p, miR-155-5p, miR-182-5p, miR-2331-3p, miR-208b-5p, miR-130b-5p, miR-664a, miR-338-5p, miR-2285j, miR-3184-5p, miR-6134, miR-224-5p, miR-214, miR-145a-3p, miR-3074-5p, miR-148a-5p, miR-378d, miR-2284u, miR-33b-3p, miR-140-3p, miR-1197-5p, miR-2408, miR-1247-5p, miR-21-3p, miR-760-3p, miR-324-3p, novel\_17, miR-2411, miR-376a-5p, miR-130a-5p, miR-195a-3p, miR-20a, miR-335-3p, miR-378g, miR-2285u, miR-7977, miR-211-5p, miR-2284g, miR-664b, miR-2319b, miR-1843a-3p, miR-423-5p, miR-361-3p, miR-452-5p, miR-2447, miR-3059-5p, miR-885-5p, miR-1388-5p, miR-101a-5p, miR-2426, miR-450b-5p, miR-30b-3p, miR-296-5p, miR-484, miR-4791, miR-148b-5p, miR-105-1, miR-1343-3p, miR-2300a-5p, miR-381-5p, miR-214-3p, miR-182-5p, miR-106b-5p, miR-431-5p, miR-193a, miR-2310, miR-744-3p, miR-652-5p, miR-2284b, miR-1388-3p, miR-20b-5p, miR-1814c, miR-10b-3p, miR-30e-5p, miR-300-3p, miR-141-3p, miR-204-5p, miR-144, miR-331-3p, miR-1260b, miR-6128, miR-1306-5p, miR-155-5p, miR-23b-5p, miR-302a-5p, miR-2411-5p, miR-1224-5p, miR-431, miR-429-3p, miR-107, miR-200a-3p, miR-2898, miR-127-5p, miR-200c-3p, miR-30f, miR-1260a, miR-2285af, miR-664-3p, miR-200c, miR-2284y, miR-1271-3p, miR-2284a, miR-28b, miR-107, miR-2387, miR-144-3p, miR-3074-5p, miR-656-5p, miR-128-1-5p, miR-382-5p, miR-502-5p, miR-4324, miR-20a-5p, miR-28c, miR-211, novel\_120, miR-30b-3p, miR-381-5p, miR-1260b, miR-197-3p, miR-22-3p, miR-103, miR-3535, miR-134-3p, miR-185-5p, miR-31-5p, miR-103a-3p, miR-122-3p, miR-378a-5p, miR-105-5p, miR-106a-5p, miR-224-5p, miR-130b-5p, miR-30a-3p, miR-664a-5p, miR-34c-3p, miR-30e-3p, miR-487a-5p, miR-424-5p, miR-129-5p, miR-450b-3p, miR-16-5p, miR-129-2-3p, miR-2284v, miR-93, novel\_44, miR-93-5p, miR-30d-5p, miR-23b, miR-30e-5p, miR-21a-3p, miR-450a-1-3p, miR-20b-5p, let-7g-3p, miR-329b, miR-370-3p, miR-21-3p, miR-182-5p, miR-223-5p, novel\_25, miR-15b-5p, miR-196a-3p, miR-376b-3p, miR-200c, miR-125a-3p, miR-30b-3p, miR-30d, miR-21-3p, miR-106a, miR-466i-5p, miR-200c-3p, miR-20a, miR-3064-5p, miR-30a-3p, miR-29a-5p, miR-143-3p, miR-29b-1-5p, miR-1343-5p, miR-330-5p, miR-30a-5p, miR-3591-5p, miR-429-3p, miR-106a, miR-450a-1-3p, miR-129-1-3p, miR-23b-3p, miR-322-5p, miR-302a-5p, miR-15a-5p, miR-16a, miR-382-5p, miR-15a, miR-576-3p, miR-20a-5p, miR-326-3p, miR-8095, miR-376b-3p, miR-3591-3p, miR-378b, miR-376a-3p, miR-195a-5p, miR-450b-3p, miR-541-5p, miR-320b, miR-3120-3p, miR-3064-5p, miR-452-3p, miR-203-3p, miR-677, miR-4443, miR-376d, miR-1185-2-3p, miR-181b-3p, miR-378g, miR-2957, miR-29b-1-5p, miR-16b, miR-182-5p, miR-106b-5p, miR-326, miR-1343-5p, miR-3085-3p, miR-382, miR-23a-3p, miR-101-5p, let-7f-2-3p, miR-376b, let-7f-2-3p, miR-424-5p, miR-106a-5p, miR-503-3p, miR-2284l, miR-450c-3p, miR-30b-3p, miR-3962, miR-873a-5p, miR-1285, miR-497-5p, miR-16b, miR-30b-3p, miR-2284ab, miR-181b-2-3p, miR-548w, miR-20b, miR-1185-3p, miR-2459, miR-2285e, miR-2285g, miR-376b-3p, miR-185-5p, miR-134-3p

FAM129A ENSOARGOC family w

EGLN1 ENSOARGOC egl-9 fa

miR-151-3p, miR-2284k, novel\_63, miR-486b-3p, miR-664a, miR-138-5p, miR-450b-3p, miR-3607-3p, miR-2284v, miR-4510, miR-3074-5p, miR-1306-5p, miR-122-5p, miR-6525, miR-3154, miR-450a-1-3p, miR-186-5p, novel\_48, miR-215-5p, miR-2285aa, miR-487a-3p, miR-376c-3p, miR-2284n, miR-204-3p, miR-6130, miR-376e-3p, miR-499b-3p, miR-345-3p, miR-92a-1-5p, miR-3071-3p, miR-2397-5p, miR-2285p, miR-26a-5p, novel\_96, miR-30b-3p, miR-2284m, miR-3064-5p, miR-487a, miR-216c-5p, miR-2284a, miR-490-3p, miR-2285b, miR-2284y, miR-2411, miR-486-3p, miR-377-5p, miR-376c-3p, miR-5703, miR-23b-5p, miR-124-3p, miR-215-5p, miR-2366, novel\_133, miR-345-3p, miR-378d, miR-2284u, miR-19b-3p, miR-485-3p, miR-3600, miR-2285ad, miR-671-3p, miR-2284z, miR-450a-1-3p, miR-2411-5p, miR-9-5p, miR-487a-3p, novel\_87, miR-485-3p, miR-6402, miR-2285n, miR-1247-3p, novel\_1, miR-2284j, miR-9-5p, miR-3956-3p, miR-2447, novel\_60, miR-2428, miR-3970, miR-2387, miR-19a-3p, miR-450b-3p, miR-1291, miR-26b-5p, miR-2285u, miR-655-5p, miR-3074-5p, miR-4792, miR-2284g, miR-3064-5p, miR-3082-5p, miR-499a-3p, miR-2411-3p, novel\_103, miR-491-5p, miR-3085-3p, miR-2284b, miR-628-5p, miR-124a, miR-432-3p, miR-654-3p, novel\_23, miR-30b-3p, miR-197-3p, miR-450c-3p, miR-4791, miR-223-3p, miR-484, miR-7862, miR-2284x, miR-101a-5p, miR-138, miR-30b-3p, miR-1388-5p, miR-2284ab, miR-377-5p, miR-151a-3p, miR-548w, miR-544b, miR-411-5p, miR-1298-3p, miR-185-5p, miR-3535, miR-2284d

miR-145a-5p, miR-194-5p, miR-374b-3p, miR-1434-3p, miR-1285, miR-29b, miR-1260b, miR-2355-3p, miR-103, miR-2285g, miR-503-5p, miR-197-5p, miR-330-3p, miR-503-5p, miR-125a-5p, miR-124-5p, miR-363-5p, miR-130b-5p, miR-345-5p, miR-2285ab, miR-18b, miR-6395, miR-195a-5p, miR-1291, miR-107, miR-320b, miR-323a-5p, miR-146b-3p, miR-2404, miR-29a-3p, miR-16a, miR-382-5p, miR-502-5p, miR-15a, miR-6529b, miR-6402, miR-203b-5p, miR-1193, novel\_120, miR-342-3p, miR-326-3p, miR-2428, miR-3959-3p, miR-24-3p, miR-29d-3p, miR-501-3p, miR-345-3p, miR-214-5p, miR-483-3p, miR-378h, miR-30c-2-3p, miR-1260a, miR-107, miR-30a-3p, miR-4286, miR-181a-2-3p, miR-3065-3p, miR-199a-5p, miR-1271-3p, miR-380-5p, miR-28b, miR-18a, miR-2448-3p, miR-7144-5p, miR-671-5p, miR-10b-3p, novel\_91, miR-199a-5p, miR-365a-3p, miR-29b-3p, miR-135a-1-3p, miR-370-5p, miR-1306-3p, miR-486b-3p, miR-6128, miR-378c, miR-378b, miR-143-5p, miR-378c, miR-101a-5p, miR-5010-3p, miR-27a-3p, miR-222-5p, miR-2300a-5p, miR-9788-3p, miR-216a-3p, miR-2285e, miR-2957, miR-342, miR-326, miR-1306-5p, miR-3085-3p, miR-3955-3p, miR-376b, miR-424-5p, miR-3187-3p, miR-30c-1-3p, miR-361-3p, miR-199b-5p, miR-147-3p, miR-664b, miR-3064-5p, miR-27a-3p, miR-378e, miR-3082-5p, miR-489, miR-371a-5p, miR-7134-3p, miR-450a-5p, miR-2285f, miR-194b-5p, novel\_60, miR-3059-5p, miR-502-3p, miR-219a-2-3p, miR-2904, miR-1197-5p, miR-188-3p, novel\_133, miR-376a-5p, miR-2300b-3p, miR-378d, miR-3600, miR-532-3p, miR-383-5p, miR-15a-5p, miR-216a-5p, miR-125b, miR-185-3p, miR-221-5p, miR-760-3p, miR-466i-5p, miR-183-5p, miR-21a-3p, miR-2312, miR-18a-5p, miR-370-5p, miR-3065-3p, miR-532-5p, miR-221-5p, miR-545-3p, miR-378a-3p, novel\_25, miR-204-3p, miR-22-3p, miR-27a-5p, miR-323-5p, miR-6130, miR-193b-3p, miR-324-3p, miR-338-5p, miR-320a, miR-124-5p, miR-187a-5p, miR-664a, miR-3074-2-3p, miR-

miR-3074-2-3p, miR-214, miR-1271, let-7b, let-7b-5p, miR-346, miR-206-3p, miR-10b-5p, miR-320e, miR-29b-2-5p, miR-30a-3p, miR-324-3p, miR-30e-3p, let-7f, miR-190a-5p, miR-454-3p, miR-6516-3p, miR-17-3p, miR-155-5p, miR-450b-3p, miR-504-5p, miR-30c-1-3p, miR-2331-3p, miR-155-5p, let-7i-5p, miR-204-3p, miR-139-5p, miR-301a-3p, miR-376e-3p, miR-10a, miR-499b-3p, miR-129b-3p, miR-450a-1-3p, novel\_99, miR-625-5p, miR-345-5p, miR-2312, miR-20a, miR-143-3p, miR-486-3p, miR-2424, miR-376c-3p, miR-181b-1-3p, miR-345-3p, miR-2285p, miR-210-5p, miR-299-3p, let-7k, miR-3653-3p, miR-760-3p, miR-98-5p, miR-320d, miR-106a, miR-30d-3p, miR-106a, miR-2284h-5p, miR-1193, miR-5703, miR-1961, novel\_133, miR-378d, miR-148a-5p, miR-4429, miR-190b-5p, miR-2285f, miR-541-3p, miR-2447, miR-9-3p, novel\_111, miR-361-3p, miR-301a-5p, novel\_82, miR-335, miR-10b, miR-139-5p, miR-24-1-5p, miR-303-3p, let-7d-5p, miR-499a-3p, miR-3596, miR-9-3p, miR-335-3p, miR-136-5p, miR-504, miR-96-5p, miR-2284b, miR-106a-5p, let-7a-5p, miR-2310, miR-30c-1-3p, miR-106b-5p, miR-323b-3p, miR-326, novel\_115, novel\_103, miR-431-5p, miR-320b, miR-214-3p, let-7e, miR-3955-3p, miR-130b-3p, miR-181b-2-3p, novel\_4, miR-330-3p, miR-148b-5p, miR-216a-3p, miR-455-3p, miR-125b-2-3p, miR-7857, miR-323b, miR-1a-3p, miR-10b, miR-541, miR-301b-5p, miR-2284r, miR-101c, miR-1839-5p, miR-2284aa, miR-1388-5p, miR-28a-3p, miR-145-3p, miR-1260b, miR-323-3p, miR-93, novel\_63, miR-486b-3p, miR-3432a, miR-376c-3p, miR-376c-5p, miR-17-5p, miR-3154, miR-320a, miR-93-5p, miR-671-5p, miR-1814c, miR-7144-5p, miR-20b-5p, miR-376c-5p, miR-23a-5p, novel\_91, miR-345-5p, miR-2318, miR-876-3p, miR-10b-3p, miR-181a-2-3p, miR-4286, miR-29b-2-5p, miR-1, miR-30a-3p, miR-1271-3p, miR-490-3p, miR-2284a, let-7g, miR-2284v, novel\_39, miR-24-2-5p, let-7c-5p, miR-30c-2-3p, miR-3962, miR-2366, miR-484, miR-378d, miR-1291, miR-10b-3p, miR-330-3p, miR-6517, miR-4792, miR-331-3p, miR-2957, miR-330-3p, miR-125a-3p, miR-6402, miR-378a-5p, miR-450b-3p, miR-1185-5p, miR-2330-3p, miR-3956-3p, miR-6240, novel\_60, miR-7705, miR-1271-3p, miR-654-3p

miR-486-3p, miR-503-5p, miR-34b-3p, miR-760-3p, miR-466i-5p, miR-320d, miR-21-3p, miR-299-3p, miR-221-5p, miR-210-5p, miR-125b, miR-185-3p, miR-324-3p, miR-500a-5p, miR-216a-5p, miR-7859, miR-1247-5p, miR-18a-3p, miR-548e-3p, miR-505-3p, miR-30d-3p, miR-212-5p, miR-3600, miR-1b-3p, miR-4429, miR-941, miR-378d, miR-218-1-3p, miR-2366, miR-2300b-3p, miR-140-3p, miR-1197-5p, miR-10b-5p, miR-6134, miR-145a-3p, miR-3074-5p, miR-665-5p, miR-214, miR-664a, novel\_74, miR-874-5p, miR-500, miR-708-5p, miR-4492, miR-30e-3p, miR-665, miR-320e, miR-324-3p, miR-132-5p, miR-30a-3p, miR-193b-3p, miR-377-3p, miR-10a, miR-27a-5p, miR-2284s, novel\_32, miR-22-3p, miR-204-3p, miR-32-3p, miR-140-5p, miR-30c-1-3p, miR-2331-3p, miR-221-5p, miR-345-5p, miR-500a-3p, miR-129b-3p, miR-30c-1-3p, miR-8485, miR-2330-5p, miR-127-3p, miR-574-3p, miR-1388-3p, miR-3085-3p, miR-1185-5p, miR-491-5p, miR-103a-2-5p, miR-214-3p, miR-199b-5p, miR-1306-5p, miR-326, miR-320b, miR-342, miR-9788-3p, novel\_4, miR-2300a-5p, miR-145b, miR-2426, miR-10b, miR-301b-5p, miR-2284r, miR-484, miR-30b-3p, miR-877-3p, miR-1285-5p, miR-3956-3p, novel\_60, miR-32-3p, miR-2447, miR-3059-5p, miR-3968, miR-4726-5p, novel\_82, miR-2285n, miR-107-5p, miR-301a-5p, miR-378g, miR-203-3p, miR-452-3p, miR-20a-3p, miR-3064-5p, miR-7977, novel\_94, miR-199b-5p, miR-361-3p, miR-28b, miR-148b-5p, miR-199a-5p, novel\_39, miR-4286, miR-181a-2-3p, miR-3064-5p, miR-30a-3p, novel\_96, miR-543-5p, novel\_127, miR-6119-5p, miR-125a-3p, miR-1260a, miR-2285af, miR-30c-2-3p, miR-134-5p, miR-6517, miR-299a-3p, miR-1224-5p, miR-411-3p, miR-10a-5p, miR-134, miR-3578, miR-23b-5p, miR-330-5p, miR-29d-3p, miR-1260b, miR-1197-3p, miR-365a-5p, miR-193a-5p, miR-6128, miR-138-5p, miR-28-5p, miR-134-5p, miR-486b-3p, miR-592, miR-29b-3p, miR-409-3p, miR-331-3p, miR-125b-5p, miR-154b-5p, miR-

|       |                     |                                                                                                                                                                                                                                                                                                                                                                                                                                                                                                                                                                                                                                                                                                                                                                                                                                                                                                                                                                                                                                                                                                                                                                                                                                                                                                                                                                                                                                                                                                                                                                                     |
|-------|---------------------|-------------------------------------------------------------------------------------------------------------------------------------------------------------------------------------------------------------------------------------------------------------------------------------------------------------------------------------------------------------------------------------------------------------------------------------------------------------------------------------------------------------------------------------------------------------------------------------------------------------------------------------------------------------------------------------------------------------------------------------------------------------------------------------------------------------------------------------------------------------------------------------------------------------------------------------------------------------------------------------------------------------------------------------------------------------------------------------------------------------------------------------------------------------------------------------------------------------------------------------------------------------------------------------------------------------------------------------------------------------------------------------------------------------------------------------------------------------------------------------------------------------------------------------------------------------------------------------|
|       |                     | miR-7859, miR-487a-3p, miR-222-5p, miR-15a-5p, miR-532-3p, miR-2284h-5p, miR-106a, miR-30d-3p, miR-485-3p, miR-4429, miR-361-5p, miR-378i, miR-2300b-3p, miR-124-3p, miR-378a-3p, miR-1193, miR-217-5p, miR-188-3p, miR-5703, miR-377-5p, miR-2424, miR-183-5p, miR-329a-5p, miR-2285w, miR-20a, miR-106a, miR-320d, miR-30b-3p, miR-1277-5p, miR-2285p, miR-618, miR-500a-5p, miR-125b, miR-422a, miR-6516, miR-301a-3p, novel_25, miR-378a-3p, miR-496-3p, miR-532-5p, miR-552-3p, miR-133b-3p, let-7g-3p, miR-18a-5p, novel_99, miR-27b-5p, miR-500a-3p, miR-6525, miR-206-3p, miR-433-5p, miR-378c, miR-2330-3p, miR-6516-3p, miR-487b-5p, miR-17-3p, miR-454-3p, miR-500, miR-874-5p, miR-208b-5p, miR-130b-5p, miR-15b-3p, miR-2285j, miR-222-3p, miR-30e-3p, miR-30a-3p, miR-148b-5p, miR-500-5p, miR-221-3p, miR-105-1, novel_78, miR-330-3p, miR-378c, miR-1388-5p, miR-2284aa, miR-378b, miR-296-                                                                                                                                                                                                                                                                                                                                                                                                                                                                                                                                                                                                                                                                         |
| PDGFD | ENSOARGO(platelet   | 5p, miR-1298-5p, miR-1a-3p, miR-125b-2-3p, miR-30b-3p, miR-378d, miR-124a, miR-106a-5p, miR-424-5p, miR-1185-5p, miR-130b-3p, miR-3955-3p, miR-103a-2-5p, miR-320b, miR-505, miR-106b-5p, miR-16b, miR-378e, miR-3596, miR-378g, miR-3082-5p, miR-203-3p, miR-664b, miR-4792, miR-452-3p, miR-211-5p, miR-136-5p, miR-361-3p, miR-221, miR-378j, miR-361-3p, miR-362-5p, novel_111, miR-1296-5p, miR-450a-5p, miR-335, miR-374a-3p, miR-2285n, miR-2440, miR-2285y, miR-107-5p, miR-322-5p, miR-505-5p, miR-6516-5p, miR-378h, miR-2284z, novel_121, miR-2285ad, miR-222, miR-18b-5p, miR-105-2, miR-496, miR-1290, miR-29d-3p, miR-1957a, miR-200a, miR-450c-5p, miR-2285b, miR-30a-3p, miR-1, miR-2284f, miR-450a-2-3p, miR-17-3p, miR-1a-2-5p, miR-200a-3p, miR-543-5p, miR-6119-5p, miR-664-3p, miR-125a-3p, miR-217, miR-3965, miR-133c, miR-503-3p, miR-370-3p, miR-141-3p, miR-125a, miR-329b, miR-20b-5p, miR-188-3p, miR-92-5p, miR-3154, miR-18a, miR-376c-5p, miR-210-5p, miR-217, miR-125b, miR-760-3p, miR-214-3p, miR-125a-5p, miR-494-3p, miR-4286, miR-654-3p, miR-664b-3p, miR-2432, miR-2113, miR-217-5p, miR-1197-5p, miR-450c-3p, miR-133a-3p, miR-151a-3p, miR-1343-3p, miR-505-5p, miR-149-5p, miR-411-5p, miR-216a-3p, miR-532-3p, miR-450a-1-3p, miR-194-3p, miR-218-5p, miR-324-3p, miR-151-3p, miR-125b-5p, miR-450b-3p, miR-2285t, miR-874-5p, miR-4492, miR-3074-5p, miR-214, miR-346, miR-145-3p, miR-450a-1-3p, miR-488-3p, miR-379-5p, miR-625-5p, miR-3074-5p, miR-4792, novel_68, miR-125a, miR-370-3p, miR-489, miR-670-3p, miR-154b-5p, miR-6535 |
| DPEP2 | ENSOARGO( dipeptid. | miR-380-5p, miR-4443, miR-486-3p, miR-133c, miR-330-3p, miR-6240, miR-380-5p, miR-3120-3p, miR-760-3p, miR-486b-3p, miR-543-5p, miR-6529b, miR-2448-3p, miR-21a-3p, miR-330-3p                                                                                                                                                                                                                                                                                                                                                                                                                                                                                                                                                                                                                                                                                                                                                                                                                                                                                                                                                                                                                                                                                                                                                                                                                                                                                                                                                                                                      |
| EXOC2 | ENSOARGO( exocyst   |                                                                                                                                                                                                                                                                                                                                                                                                                                                                                                                                                                                                                                                                                                                                                                                                                                                                                                                                                                                                                                                                                                                                                                                                                                                                                                                                                                                                                                                                                                                                                                                     |



miR-17-3p, miR-6536, miR-200c-3p, miR-30b-3p, miR-196a-3p, miR-200c, miR-30c-2-3p, miR-122-3p, miR-142a-3p, miR-486-3p, miR-3529-3p, miR-1, miR-195a-3p, miR-300, miR-200b-3p, miR-105-2, miR-5703, miR-200b, miR-2284z, miR-2284h-5p, miR-2285ad, miR-429-3p, miR-196a-2-3p, miR-664a, miR-17-3p, miR-486b-3p, miR-5100, miR-135a-1-3p, miR-370-5p, miR-409-3p, miR-338-5p, miR-206-3p, miR-539-5p, miR-425-5p, miR-30f, miR-582-5p, miR-299, miR-381-3p, miR-30e-5p, miR-582-5p, miR-365a-3p, miR-30c-1-3p, miR-370-5p, miR-552-3p, miR-330-3p, miR-105-5p, miR-30c-1-3p, miR-6240, let-7f-2-3p, let-7f-2-3p, miR-1a-3p, miR-142-3p, miR-126a-5p, miR-1185-3p, miR-31-5p, miR-105-1, miR-330-3p, miR-628-3p, miR-206, miR-2285t, miR-2284q, miR-382-3p, miR-877-3p, novel\_111, novel\_27, miR-2428, miR-212-3p, miR-1193, miR-17-3p, miR-7857-3p, miR-1185-2-3p, miR-4443, miR-320b, miR-12-3p, miR-211b, miR-10100-5p, miR-102, miR-22-5p, miR-2284x, miR-103a-3p, miR-339-5p, miR-149-5p, miR-628-5p, miR-668-3p, miR-432-3p, miR-432-3p, let-7a-2-3p, miR-3065-5p, miR-216a-3p, miR-1306, miR-378f, miR-4324, miR-425-5p, miR-206, miR-335-5p, miR-301b-3p, miR-23b-5p, miR-330-5p, novel\_79, miR-505-5p, novel\_121, miR-134-5p, miR-2284z, miR-219-3p, miR-30f, miR-6536, novel\_127, miR-3064-5p, miR-2285b, novel\_39, miR-200a, miR-345-5p, miR-876-3p, miR-874-3p, miR-1271, miR-3956, miR-125a, miR-300-3p, miR-2284k, novel\_63, miR-125b-5p, novel\_9, miR-134-5p, miR-541, miR-301b-5p, miR-1a-3p, miR-1388-5p, miR-1343-3p, miR-1185-3p, miR-455-3p, miR-148b-5p, miR-199a-3p, miR-214-3p, miR-2284b, miR-378d, miR-8485, miR-504, miR-335-3p, miR-2284g, miR-211-5p, miR-2483-3p, miR-4443, miR-1185-2-3p, miR-218-5p, novel\_82, miR-301a-5p, miR-3956-3p, miR-885-5p, miR-2447, miR-2284j, miR-361-3p, miR-423-5p, miR-378i, miR-378a-3p, miR-142-3p, miR-33b-3p, miR-493-3p, miR-148a-5p, miR-18a-3p, miR-422a, miR-503-5p, miR-421-5p, miR-664b-3p, miR-376a-5p, miR-2285c, miR-339b, miR-345-5p, miR-1827, miR-30c-1-3p, miR-504-5p, miR-2331-3p, miR-301a-3p, miR-582-5p, miR-151b, miR-15b-3p, miR-151-3p, miR-219b-3p, miR-130b-5p, miR-4492, miR-454-3p, miR-214, miR-769-5p, miR-3184-5p, miR-653, miR-374b-3p, miR-3071-5p, miR-138, miR-2284ab, miR-2889, miR-503-5p, miR-185-5p, miR-432-5p, miR-2285g, miR-103, miR-503-5p, miR-197-5p, miR-125a-5p, miR-130b-5p, miR-101-5p, miR-345-5p, miR-2387, miR-2285ab, miR-18a-3p, miR-107, miR-19a-3p, miR-505-3p, miR-6516-3p, miR-2404, miR-6402, miR-147-5p, miR-502b, miR-203b-5p, miR-17-3p, miR-3959-3p, miR-211, miR-2428, miR-326-3p, miR-134, miR-3578, let-7a-2-3p, miR-128-3p, miR-378h, miR-2411-5p, miR-339a, miR-30c-2-3p, miR-17-3p, miR-107, miR-3529-3p, miR-1, miR-2284a, miR-490-

STX12 ENSOARGO( syntaxin

DHRS7C ENSOARGO( dehydrog

miR-452-3p, miR-664b, miR-211-5p, miR-541-5p, miR-7689-3p, miR-3082-5p, miR-2483-3p, miR-7857-3p, miR-27a-3p, miR-4443, miR-199b-5p, miR-299b-5p, miR-544-5p, miR-9-3p, miR-335-3p, miR-493-5p, miR-541-3p, miR-3059-5p, miR-362-5p, miR-154a, miR-628-3p, miR-1343-3p, miR-199b-3p, miR-2300a-5p, miR-330-3p, miR-145b, miR-27a-3p, miR-147a, miR-421, miR-9788-3p, miR-500-5p, miR-455-3p, miR-541, miR-484, miR-6529a, miR-30b-3p, miR-125b-2-3p, miR-101a-5p, miR-450b-5p, miR-101c, miR-382-3p, miR-424-5p, miR-2330-5p, miR-744-3p, miR-23a-3p, miR-2310, miR-4532, novel\_115, miR-320b, miR-182-5p, miR-16b, miR-29b-1-5p, miR-491-5p, miR-542-5p, miR-199b-5p, miR-221-5p, miR-296-3p, miR-182-5p, miR-532-5p, miR-21-3p, miR-582-5p, miR-192-5p, miR-15b-5p, miR-3613-5p, miR-339b, miR-582-5p, miR-2330-3p, miR-224-5p, miR-664a, miR-6516-3p, miR-424-5p, miR-485-3p, miR-212-5p, miR-3600, miR-15a-5p, miR-23b-3p, miR-487a-3p, miR-7859, miR-2284h-5p, miR-199a-3p, miR-215-5p, miR-1246, miR-1434-5p, miR-5703, miR-2904, miR-4429, miR-33b-3p, miR-2285w, miR-329a-5p, miR-183-5p, miR-2887, miR-29b-1-5p, miR-2424, miR-486-3p, miR-542-5p, miR-26a-5p, miR-92a-1-5p, miR-345-3p, miR-324-3p, miR-500a-5p, miR-466i-5p, miR-320d, miR-2484, miR-21-3p, miR-221-5p, miR-216b-3p, miR-329-5p, miR-26b-5p, miR-374c-3p, miR-670-3p, miR-144-3p, miR-320c, miR-669, miR-2387, miR-3591-3p, miR-150-5p, miR-195a-5p, miR-542-5p, miR-3957-3p, miR-211, miR-199b-5p, miR-2428, miR-15a, miR-3613, novel\_87, miR-16a, novel\_1, miR-6119-3p, miR-199c, miR-31-5p, miR-339-5p, miR-3431, novel\_116, miR-145a-5p, miR-374b-3p, miR-30b-3p, miR-16b, miR-188-5p, miR-27b-3p, miR-497-5p, miR-26a-2-3p, miR-493-5p, miR-6240, miR-668-3p, miR-432-3p, miR-432-3p, miR-654-3p, miR-503-3p, miR-539-3p, miR-296-3p, miR-296-3p, miR-224-5p, miR-2411-3p, novel\_51, miR-330-3p, miR-482-3p, miR-1342-5p, miR-215-3p, miR-2284g, miR-145b, miR-2284b, miR-2320-3p, miR-2284y, novel\_25, miR-145-3p, miR-2284a, miR-145a-5p, miR-2284x, miR-2284u, miR-490-5p, miR-6402, miR-500b-5p, miR-362-5p, miR-335-3p, miR-362-5p, miR-3591-3p, miR-301, miR-299b-3p, miR-300-3p, miR-3120-3p, miR-21-3p, miR-20a-3p, miR-378b, miR-221-5p, novel\_68, miR-299-3p, miR-221-5p, miR-217, miR-455-5p, miR-500a-5p, miR-197-5p, miR-2285af, miR-192-3p, let-7j, miR-652-5p, miR-455-5p, miR-218-1-3p, miR-217-5p, miR-149-5p, miR-500-5p, miR-299a-3p, miR-432-3p, miR-30c-1-3p, miR-486-3p, miR-30c-2-3p, miR-324-3p, miR-3141, miR-760-3p, miR-2285l, miR-25-5p, miR-1277-5p, miR-30b-3p, miR-340-3p, miR-412, miR-1298-3p, miR-9-5p, miR-532-3p, miR-5703, miR-1197-5p, miR-412-3p, miR-2904, miR-2889, miR-133a-3p, miR-665-5p, miR-9-5p, miR-133a-3p, miR-103b, miR-6128, miR-361-3p, miR-3184-5p, miR-423-5p, miR-2285n, novel\_63, miR-665, miR-100-3p, miR-324-3p, miR-486b-3p, miR-2284q, miR-208b-5p, miR-4492, miR-30c-1-3p, miR-2355-5p, novel\_69, miR-6535, miR-3141, miR-361-3p, miR-3154, miR-137-3p, miR-133b-3p, novel\_94, miR-7144-5p

miR-541-3p, miR-3059-5p, miR-194b-5p, miR-502-3p, miR-30b-5p, miR-382-3p, miR-2285n, miR-107-5p, miR-4726-5p, miR-20a-3p, miR-3064-5p, miR-7977, miR-7857-3p, miR-376d, miR-199b-5p, miR-361-3p, miR-877-3p, miR-1839-3p, miR-382-3p, miR-494-3p, miR-424-5p, miR-2330-5p, miR-376b, miR-193a, miR-3187-3p, miR-326, miR-1306-5p, miR-320b, miR-25-5p, miR-3085-3p, miR-105-1, novel\_4, miR-2300a-5p, miR-221-3p, miR-9788-3p, miR-216a-3p, miR-30b-3p, miR-2426, miR-2284aa, miR-4510, miR-145a-3p, miR-3074-2-3p, miR-1271, miR-206-3p, miR-6134, miR-222-3p, miR-320e, miR-664a, miR-17-3p, miR-487a-5p, miR-424-5p, miR-221-5p, miR-545-3p, miR-370-5p, miR-3065-3p, miR-323-5p, miR-6130, miR-192-5p, miR-22-3p, miR-21a-3p, miR-30f, miR-2411, miR-196a-3p, miR-185-3p, miR-125b, miR-216a-5p, miR-320d, miR-21-3p, miR-30d, miR-30b-3p, miR-221-5p, miR-505-3p, miR-340-5p, miR-15a-5p, miR-148b-3p, novel\_83, miR-532-3p, miR-215-5p, miR-1197-5p, miR-140-3p, miR-2904, miR-4429, miR-378d, miR-219b-3p, miR-495-3p, miR-17-3p, miR-1193, miR-371b-3p, miR-211, miR-2428, novel\_27, miR-326-3p, miR-15a, miR-16a, miR-203b-5p, miR-378b, miR-29a-3p, miR-670-3p, miR-323a-5p, miR-376b-3p, miR-18a-3p, miR-378b, miR-1291, miR-505-3p, miR-195a-5p, miR-379-5p, miR-9851-3p, miR-363-5p, miR-503-5p, miR-330-3p, miR-466f-3p, miR-125a-5p, miR-26b-3p, miR-503-5p, miR-185-5p, miR-432-5p, miR-653, miR-3071-5p, miR-194-5p, miR-1260b, miR-29b, miR-30b-3p, miR-6128, miR-3607-3p, miR-145-3p, miR-365a-5p, miR-2332, miR-370-5p, miR-135a-1-3p, miR-29b-3p, miR-1-5p, miR-3969, miR-486b-3p, miR-204-5p, miR-31-3p, miR-141-3p, miR-215-5p, miR-370-3p, miR-199a-5p, miR-488-3p, miR-381-3p, miR-320a, miR-10b-3p, miR-7144-5p, miR-4286, miR-181a-2-3p, miR-1, miR-30a-3p, miR-28b, miR-24-2-5p, miR-490-3p, miR-1271-3p, miR-100a-5p, miR-1057a, miR-3065-3p, miR-376b-3p, miR-

NFATC3 ENSOARGO(nuclear

miR-3959-3p, miR-2428, miR-2285x, miR-495-3p, miR-92a-3p, miR-133a-5p, miR-6529b, miR-15a, let-7i, miR-16a, miR-670-3p, miR-2404, miR-7-1-3p, miR-320b, miR-19a-3p, miR-195a-5p, miR-7975, miR-2387, miR-376b-3p, miR-539-3p, miR-130b-5p, miR-1343-5p, miR-503-5p, miR-224-5p, miR-330-3p, let-7g-5p, miR-503-5p, miR-133b-5p, miR-377-5p, miR-219a-1-3p, miR-1260b, miR-21-5p, miR-138, miR-181a-5p, miR-653, miR-374b-3p, miR-133a-3p, miR-6128, miR-3607-3p, miR-138-5p, miR-28-5p, miR-486b-3p, miR-99b-3p, miR-3969, miR-365a-3p, miR-2284n, miR-487a-3p, miR-141-3p, miR-215-5p, miR-370-3p, miR-10b-3p, miR-671-5p, miR-488-3p, miR-320a, miR-3154, miR-28b, miR-490-3p, miR-1271-3p, miR-3065-3p, miR-191-3p, miR-181b-5p, miR-450a-2-3p, miR-92a-3p, miR-1260a, miR-376b-3p, let-7c-5p, miR-30c-2-3p, miR-6516-5p, miR-483-3p, miR-214-5p, miR-545-5p, miR-222, miR-196a-2-3p, let-7d, miR-411-3p, miR-496, miR-345-3p, miR-218-2-3p, miR-8095, miR-9-3p, miR-541-3p, miR-212-3p, novel\_60, miR-452-5p, miR-181d-5p, miR-4726-5p, miR-2284q, miR-371a-5p, miR-3082-5p, miR-489, miR-376d, let-7d-5p, miR-452-3p, miR-7977, miR-499b-5p, miR-541-5p, miR-361-3p, miR-30c-1-3p, miR-424-5p, let-7a-5p, miR-652-5p, let-7c-3p, miR-3955-3p, let-7e, miR-2285o, novel\_103, miR-320b, miR-362-3p, miR-2957, miR-2320-3p, miR-216a-3p, miR-221-3p, miR-2300a-5p, miR-544a, miR-2284aa, miR-296-5p, miR-125b-2-3p, miR-6134, miR-338-3p, let-7b-5p, miR-145a-3p, miR-3074-2-3p, miR-2330-3p, miR-155-5p, miR-664a, miR-450b-3p, miR-424-5p, miR-708-5p, miR-222-3p, miR-320e, miR-324-3p, miR-132-5p, miR-544-3p, miR-192-5p, miR-6516, miR-155-5p, novel\_32, miR-22-3p, miR-204-3p, miR-496-3p, miR-545-3p, miR-21-3p, miR-3065-3p, miR-154b-3p, let-7g-3p, miR-133b-3p, novel\_99, let-7f-1-3p, miR-27b-5p, miR-125b-2-3p, miR-2284m, miR-320d, miR-21-3p, miR-30b-3p, miR-196a-3p, miR-185-3p, miR-1827, let-7g-3p, let-7i-5p, miR-22-3p, miR-6130, miR-486b-3p, miR-3432a, let-7f, let-7b-5p, miR-2330-3p, miR-103b, miR-3074-2-3p, miR-4510, let-7b, miR-378d, miR-33b-3p, let-7d, miR-330-5p, miR-501-3p, miR-2366, miR-1961, miR-2411-5p, miR-1224-5p, novel\_96, miR-543-5p, let-7k, let-7f-5p, miR-760-3p, miR-98-5p, let-7c-5p, miR-185-3p, miR-125a-3p, miR-2411, let-7g, miR-486-3p, novel\_39, let-7e-5p, miR-493-5p, miR-1291, miR-361-3p, miR-500-3p, let-7d-5p, novel\_69, miR-25, miR-378g, miR-320b, let-7i, miR-502-3p, miR-326-3p, miR-361-3p, miR-541-3p, miR-7862, miR-744-5p, miR-4508, miR-501-3p, miR-22-3p, miR-1843b-5p, miR-541, miR-1434-3p, miR-653, miR-9788-3p, miR-134-3p, let-7g-5p, novel\_78, let-7e, miR-491-5p, novel\_51, miR-197-5p, miR-326, miR-4532, miR-628-5p, miR-493-5p, let-7a-5p, miR-153-3p, miR-30d, miR-30b, miR-7-5p, miR-654-3p, miR-664b-3p, miR-8485, miR-758-3p, let-7a-2-3p, miR-668-3p, miR-885-3p, miR-133a-3p, miR-30c, miR-101c, let-7a-2-3p, miR-19b-2-3p, miR-30c-5p, miR-134, miR-7b-5p, miR-758-3p, miR-30a-5p, miR-7859, miR-153, miR-134-5p, miR-134-5p, miR-4324, miR-30b-5p, miR-101-3p, miR-19b-1-5p, miR-346, miR-338-3p, let-7g-3p, miR-30f, miR-885-3p, miR-30e-5p, miR-30d-5p, miR-2355-5p

|          |                   |                                                                                                                                                                                                                                                                                                                                                                                                                                                                                                                                                                                                                                                                                                                                                                                                                                                                                                                                                                                                                                                                                                                                                                                                                                                                                                                                                                                                                                                                                                                                                                                                                                                                                                                                                                                                                                                                                                                                                                                                                                                                                                                                                                                                                                                                                                                                                                                                                                                                                                                                                               |
|----------|-------------------|---------------------------------------------------------------------------------------------------------------------------------------------------------------------------------------------------------------------------------------------------------------------------------------------------------------------------------------------------------------------------------------------------------------------------------------------------------------------------------------------------------------------------------------------------------------------------------------------------------------------------------------------------------------------------------------------------------------------------------------------------------------------------------------------------------------------------------------------------------------------------------------------------------------------------------------------------------------------------------------------------------------------------------------------------------------------------------------------------------------------------------------------------------------------------------------------------------------------------------------------------------------------------------------------------------------------------------------------------------------------------------------------------------------------------------------------------------------------------------------------------------------------------------------------------------------------------------------------------------------------------------------------------------------------------------------------------------------------------------------------------------------------------------------------------------------------------------------------------------------------------------------------------------------------------------------------------------------------------------------------------------------------------------------------------------------------------------------------------------------------------------------------------------------------------------------------------------------------------------------------------------------------------------------------------------------------------------------------------------------------------------------------------------------------------------------------------------------------------------------------------------------------------------------------------------------|
|          |                   | miR-6536, miR-124-5p, miR-4726-5p, miR-320d, miR-502b, miR-2285p, miR-320b, miR-409-3p, miR-2331-5p, miR-100-3p, miR-29a-5p, miR-382, miR-4429, miR-380-3p, miR-200b-3p, miR-188-3p, miR-320a, miR-200b, miR-532-3p, miR-320c, miR-548o-3p, miR-216b-3p, miR-548e-3p, miR-212-5p                                                                                                                                                                                                                                                                                                                                                                                                                                                                                                                                                                                                                                                                                                                                                                                                                                                                                                                                                                                                                                                                                                                                                                                                                                                                                                                                                                                                                                                                                                                                                                                                                                                                                                                                                                                                                                                                                                                                                                                                                                                                                                                                                                                                                                                                              |
| HNRNPH1  | ENSOARGO(heteroge |                                                                                                                                                                                                                                                                                                                                                                                                                                                                                                                                                                                                                                                                                                                                                                                                                                                                                                                                                                                                                                                                                                                                                                                                                                                                                                                                                                                                                                                                                                                                                                                                                                                                                                                                                                                                                                                                                                                                                                                                                                                                                                                                                                                                                                                                                                                                                                                                                                                                                                                                                               |
| MME      | ENSOARGO(membrane | miR-301a-5p, miR-100-3p, miR-301b-5p, miR-1285, novel_82, miR-664b-3p<br>miR-362-5p, miR-154a, miR-809b, miR-212-3p, novel_60, miR-3059-5p, miR-450a-5p, miR-3958-3p, miR-30b-5p, miR-489, miR-378e, miR-27a-3p, miR-452-3p, miR-20a-3p, miR-3064-5p, miR-7977, miR-541-5p, novel_94, miR-361-3p, miR-30c-1-3p, miR-193a, miR-424-5p, let-7c-3p, miR-3955-3p, miR-3085-3p, novel_103, miR-326, miR-320b, miR-2957, miR-362-3p, miR-9788-3p, miR-500-5p, miR-216a-3p, miR-27a-3p, miR-222-5p, miR-544a, miR-101a-5p, miR-378c, miR-3120-5p, miR-484, miR-378b, miR-6529a, miR-296-5p, miR-6134, miR-145a-3p, miR-378c, miR-664a, miR-17-3p, miR-708-5p, miR-208b-5p, miR-424-5p, miR-320e, miR-19b-1-5p, miR-324-3p, miR-193b-3p, miR-139-5p, miR-27a-5p, miR-544-3p, miR-877-5p, miR-22-3p, novel_25, miR-660-5p, miR-378a-3p, miR-182-5p, miR-30f, miR-18a-5p, miR-582-5p, novel_99, miR-125b-2-3p, miR-5100, miR-760-3p, miR-466i-5p, miR-320d, miR-299-3p, miR-21-3p, miR-34b-5p, miR-30d, miR-125b, miR-185-3p, miR-148b-3p, miR-15a-5p, miR-671-3p, miR-532-3p, miR-4429, miR-19b-3p, miR-378d, miR-362-3p, miR-2300b-3p, novel_133, miR-1197-5p, miR-1193, miR-140-3p, miR-24-3p, miR-2428, miR-449a, miR-326-3p, miR-17-3p, miR-199c, miR-203b-5p, miR-6402, miR-6529b, miR-502-5p, miR-15a, miR-34c, miR-16a, miR-670-3p, miR-34b, miR-2404, miR-378b, miR-320b, miR-19a-3p, miR-195a-5p, miR-6395, miR-2387, miR-18b, miR-378b, miR-18a-3p, miR-296-3p, miR-130b-5p, miR-363-5p, miR-124-5p, miR-466f-3p, miR-125a-5p, miR-660, miR-224-5p, miR-330-3p, miR-185-5p, miR-544b, miR-6238, miR-133b-5p, miR-130a-3p, miR-665, miR-1260b, miR-138, miR-7862, miR-2889, miR-500b-5p, miR-145-3p, miR-378c, miR-138-5p, miR-28-5p, miR-486b-3p, miR-135a-1-3p, miR-409-3p, miR-331-3p, miR-365a-3p, miR-34c-5p, miR-324-5p, miR-615-5p, miR-370-3p, miR-485-5p, miR-488-3p, miR-320a, miR-18a, miR-362-5p, miR-3154, miR-28b, miR-1271-3p, miR-1827, let-7e-5p, miR-137-3p, miR-378b, let-7d-5p, let-7i-5p, miR-155-5p, novel_69, miR-320b, miR-141-3p, miR-3064-5p, miR-130b-5p, miR-147-5p, miR-138-5p, miR-450b-3p, miR-155-5p, miR-301a-5p, let-7i, miR-107-5p, let-7f, miR-133a-5p, let-7b-5p, miR-452-5p, let-7b, miR-1839-5p, miR-155-5p, miR-138, let-7d, miR-142-3p, miR-188-3p, miR-484, miR-301b-5p, miR-1961, miR-450a-1-3p, miR-421, let-7g-5p, miR-106b-3p, miR-200a-3p, miR-103a-2-5p, let-7k, let-7e, miR-3085-3p, let-7f-5p, miR-98-5p, miR-505, let-7c-5p, let-7g, miR-200a, miR-654-3p, miR-432-3p, miR-3064-5p, let-7a-5p, miR-130b-5p |
| C11orf84 | ENSOARGO(chromoso |                                                                                                                                                                                                                                                                                                                                                                                                                                                                                                                                                                                                                                                                                                                                                                                                                                                                                                                                                                                                                                                                                                                                                                                                                                                                                                                                                                                                                                                                                                                                                                                                                                                                                                                                                                                                                                                                                                                                                                                                                                                                                                                                                                                                                                                                                                                                                                                                                                                                                                                                                               |
| ZIM2     | ENSOARGO(zinc fin |                                                                                                                                                                                                                                                                                                                                                                                                                                                                                                                                                                                                                                                                                                                                                                                                                                                                                                                                                                                                                                                                                                                                                                                                                                                                                                                                                                                                                                                                                                                                                                                                                                                                                                                                                                                                                                                                                                                                                                                                                                                                                                                                                                                                                                                                                                                                                                                                                                                                                                                                                               |

miR-181a-2-3p, miR-193a-5p, miR-144-5p, miR-374a-3p, miR-145-3p, novel\_63, miR-135a-1-3p, miR-370-5p, miR-3969, miR-134-5p, miR-374b-3p, miR-215-5p, miR-3965, miR-23b, miR-3154, miR-3074-1-3p, miR-485-5p, miR-2284f, miR-2284y, miR-2284a, miR-490-3p, miR-664-3p, miR-17-3p, miR-2898, miR-107, miR-2285ad, miR-6517, miR-483-3p, miR-134-5p, novel\_121, miR-214-5p, miR-134, miR-1343-5p, miR-330-5p, miR-128-3p, miR-17-3p, miR-1193, miR-24-3p, miR-326-3p, miR-4324, miR-576-3p, miR-2284o, miR-3074-5p, miR-2404, miR-374c-3p, miR-677, miR-6535, miR-181b-3p, miR-21c, miR-216a-3p, miR-450b-3p, miR-107, miR-6240, miR-377-3p, miR-330-3p, miR-2331-5p, miR-483-3p, miR-1343-5p, miR-133b-5p, miR-103a-3p, miR-432-5p, miR-134-3p, miR-185-5p, miR-149-5p, miR-103, miR-432, miR-1843b-5p, miR-542-3p, miR-21-5p, miR-27b-3p, miR-539-5p, miR-4510, miR-3074-5p, miR-665-5p, miR-3074-2-3p, miR-132-5p, miR-665, miR-17-3p, miR-664a, miR-370-5p, miR-192-5p, miR-377-3p, miR-6130, miR-139-5p, miR-204-3p, miR-1895, miR-376a-5p, miR-181b-1-3p, miR-3653-3p, miR-21-3p, miR-23b-3p, miR-383-5p, miR-222-5p, miR-23c, miR-2366, miR-215-5p, miR-140-3p, miR-1434-5p, miR-2284u, miR-378d, miR-2447, miR-212-3p, miR-1296-5p, miR-877-3p, miR-361-3p, novel\_82, miR-2285n, miR-2285y, miR-4726-5p, miR-3968, miR-374a-3p, miR-664b, miR-139-5p, miR-4792, miR-2284g, miR-452-3p, miR-2285u, miR-378g, miR-144-5p, miR-27a-3p, miR-4443, miR-361-3p, miR-877-3p, miR-382-3p, miR-23a-3p, miR-2284b, miR-326, miR-330-3p, miR-181b-2-3p, miR-27a-3p, miR-2459, miR-421, miR-6529a, miR-484, miR-125b-2-3p

RALGAPA2 ENSOARGOC Ral GTPa miR-211, miR-8095, miR-212-3p, miR-9-5p, miR-452-5p, miR-4726-5p, novel\_1, miR-218-5p, miR-2285y, miR-378g, novel\_69, miR-4443, miR-541-5p, miR-211-5p, miR-10a-5p, miR-7977, miR-504, miR-9851-3p, miR-148a-3p, miR-2387, miR-124a, miR-2330-5p, miR-6240, miR-214-3p, miR-7-5p, novel\_103, miR-330-3p, novel\_51, miR-432-5p, miR-134-3p, miR-3955-5p, miR-330-3p, miR-1343-3p, miR-2300a-5p, miR-30b-3p, miR-1388-5p, miR-2426, miR-432, miR-7b-5p, miR-10b, miR-30b-3p, miR-10b-5p, miR-122-5p, miR-4510, miR-193a-5p, miR-214, miR-665-5p, miR-204-5p, miR-331-5p, miR-10a, miR-6130, novel\_32, miR-574-5p, miR-504-5p, miR-2474, miR-625-5p, miR-1827, miR-671-5p, miR-21a-3p, miR-760-3p, miR-543-5p, miR-152-3p, miR-196a-3p, miR-9-5p, miR-148b-3p, miR-1224-5p, miR-196a-2-3p, miR-10a-5p, novel\_133, miR-124-3p

WASF2 ENSOARGOC WAS prot. miR-194a, miR-505, miR-219b-5p, miR-6119-5p, miR-200a-3p, miR-378a-5p, miR-124-5p, miR-23a-3p, miR-382-3p, miR-130b-5p, miR-3071-5p, miR-194-5p, miR-30b-3p, miR-30a-5p, miR-1193, miR-873a-5p, miR-296-5p, miR-3120-5p, miR-27b-3p, miR-133a-3p, miR-128-3p, miR-30b-3p, miR-885-3p, miR-27a-3p, miR-3600, miR-1224-5p, miR-23b-3p, miR-320e, miR-370-5p, miR-130b-5p, miR-495-3p, miR-194b-5p, miR-1193, miR-6527, miR-3059-5p, novel\_27, miR-216a-3p, miR-23b, miR-30d-5p, miR-30e-5p, miR-885-3p, miR-625-5p, miR-2318, miR-141-3p, miR-370-5p, miR-27a-3p

STK32A ENSOARGOC serine/t.

LAP3 ENSOARGO( leucine : miR-235b-3p, miR-134-3p, miR-185-5p, miR-343l, miR-353b, miR-2284d, miR-339-5p, miR-27b-3p, miR-188-5p, miR-16-1-3p, miR-2284ab, miR-29b, miR-194-5p, miR-1285, miR-1434-3p, miR-345-5p, miR-432-3p, miR-2284l, miR-2285r, miR-432-3p, miR-493-5p, miR-380-5p, miR-378a-5p, miR-194a, novel\_51, miR-32, miR-146a, miR-181b-3p, miR-677, miR-299b-3p, miR-670-3p, miR-29a-3p, miR-2404, miR-3120-3p, miR-3074-5p, miR-329-5p, miR-6516-3p, miR-6395, miR-146b-5p, miR-2285ab, miR-376b-5p, miR-2284w, miR-323c, miR-211, miR-29c-3p, miR-147-5p, miR-29a, miR-379-3p, miR-92a-3p, novel\_87, miR-502-5p, miR-758-5p, miR-2411-5p, miR-6516-5p, miR-302a-5p, miR-1224-5p, novel\_79, miR-299a-3p, miR-582-3p, miR-411-3p, miR-29d-3p, miR-2285b, miR-3065-3p, miR-92b-3p, miR-380-5p, miR-2478, miR-2385-3p, miR-92a-3p, miR-200c-3p, miR-339a, miR-30c-2-3p, miR-200c, miR-154b-5p, miR-3957, miR-370-3p, miR-3957-5p, miR-376c-5p, miR-345-5p, miR-376c-5p, miR-301, miR-2448-3p, miR-1306-5p, miR-204-5p, miR-3969, miR-135a-1-3p, miR-34c-3p, miR-29b-3p, miR-455-3p, miR-539-5p, miR-181b-2-3p, miR-27a-3p, novel\_4, novel\_78, miR-3120-5p, miR-21b, miR-101c, miR-101a-5p, miR-758-3p, miR-7857, miR-4791, miR-758-3p, miR-3187-3p, miR-30c-1-3p, miR-124a, miR-146b, miR-4443, miR-27a-3p, miR-489, miR-499a-3p, miR-378g, miR-211-5p, miR-139-5p, miR-493-5p, miR-299b-5p, miR-3963, miR-194b-5p, miR-2285f, miR-363-3p, miR-2284q, miR-490-5p, miR-628-3p, miR-3968, miR-101-3p, miR-2440, miR-328-3p, miR-2284h-5p, miR-548e-3p, miR-16-1-3p, miR-218-1-3p, miR-188-3p, miR-5703, miR-124-3p, miR-2411, miR-146a-5p, miR-181b-1-3p, miR-376a-5p, miR-345-3p, miR-2285w, miR-329a-5p, miR-299-3p, miR-219b-5p, miR-196a-3p, miR-216b-5p, miR-139-5p, miR-499b-3p, miR-6516, miR-27a-5p, miR-532-5p, miR-3065-3p, miR-32-5p, miR-30c-1-3p, miR-1827, miR-345-5p, miR-339b, miR-2312, miR-411, miR-

miR-152-3p, novel\_127, miR-2898, let-7f-5p, miR-30c-2-3p, let-7c-5p, miR-125a-3p, let-7g, miR-490-3p, miR-28b, miR-3064-5p, miR-1, let-7d, miR-300, miR-322-5p, miR-6516-5p, miR-1224-5p, miR-222, miR-28-5p, miR-486b-3p, miR-331-3p, miR-100-3p, miR-365a-5p, miR-16-5p, miR-7144-5p, miR-671-5p, miR-485-5p, miR-329a, miR-381-3p, miR-365a-3p, miR-2355-5p, miR-370-3p, miR-574-5p, miR-365b-5p, miR-7-5p, miR-224-5p, miR-146a, miR-377-3p, miR-296-3p, miR-539-3p, miR-296-3p, miR-503-3p, miR-654-3p, let-7f-2-3p, let-7f-2-3p, miR-497-5p, miR-30b-3p, miR-16b, miR-22-3p, miR-145a-5p, miR-7b-5p, miR-1843b-5p, miR-542-3p, miR-194-3p, miR-2355-3p, let-7g-5p, miR-134-3p, miR-377-5p, miR-26b-3p, miR-133b-5p, miR-206, miR-16a, let-7i, miR-502-5p, miR-15a, miR-576-3p, miR-28c, miR-133a-5p, miR-2428, miR-2284w, miR-495-3p, miR-146b-5p, let-7e-5p, miR-195a-5p, miR-450b-3p, miR-19a-3p, miR-1306, miR-3065-5p, miR-18a-3p, miR-378b, miR-148a-3p, miR-677, miR-181b-3p, miR-2404, miR-3074-5p, let-7k, miR-98-5p, miR-324-3p, miR-185-3p, miR-196a-3p, miR-146a-5p, miR-486-3p, miR-181b-1-3p, miR-125b-2-3p, miR-377-5p, miR-216c-5p, miR-218-1-3p, miR-142-3p, miR-19b-3p, miR-188-3p, miR-1197-5p, miR-1193, miR-1434-5p, miR-5703, miR-140-3p, novel\_133, miR-1961, miR-362-3p, novel\_83, miR-383-5p, miR-487a-3p, miR-148b-3p, miR-15a-5p, miR-212-5p, miR-485-3p, miR-18a-3p, miR-708-5p, miR-424-5p, miR-4492, miR-664a, miR-664a-5p, miR-222-3p, let-7f, miR-3184-5p, let-7b-5p, miR-6134, miR-338-3p, miR-224-5p, miR-206-3p, miR-665-5p, let-7b, miR-3074-5p, miR-145a-3p, miR-4510, miR-1827, miR-129b-3p, novel\_32, miR-22-3p, miR-204-3p, miR-15b-5p, let-7i-5p, miR-377-3p, miR-6516, miR-132-5p, miR-6130, miR-552-3p, miR-296-3p, miR-30c-1-3p, miR-146b, let-7e, miR-3085-3p, miR-362-3p, miR-16b, miR-1306-5p, novel\_103, miR-4532, miR-30c-1-3p, miR-744-3p, let-7a-



miR-210-3p, miR-505-5p, miR-483-3p, miR-6516-5p, novel\_83, miR-450a-1-3p, miR-151-5p, miR-18a-3p, miR-212-5p, miR-493-3p, miR-941, miR-128-3p, miR-345-3p, novel\_133, miR-5703, miR-1197-5p, miR-23b-5p, miR-28b, miR-199a-5p, miR-486-3p, miR-503-5p, miR-191-3p, miR-760-3p, miR-127-5p, miR-543-5p, novel\_127, miR-324-3p, miR-345-3p, miR-6516, miR-6130, miR-199a-5p, miR-151b, miR-2331-3p, miR-504-5p, miR-874-3p, miR-370-3p, miR-2355-5p, miR-1271, miR-1895, miR-485-5p, miR-450a-1-3p, miR-3154, miR-346, miR-3184-5p, miR-4510, miR-3184-3p, miR-214, miR-665-5p, miR-450b-3p, miR-138-5p, miR-486b-3p, miR-2433, miR-331-3p, miR-132-5p, miR-412-5p, miR-432-5p, miR-134-3p, miR-503-5p, miR-9788-3p, miR-149-5p, miR-216a-3p, miR-194-3p, miR-421, miR-340-3p, miR-1343-3p, miR-30b-3p, miR-138, miR-744-5p, miR-432, miR-296-5p, miR-484, miR-2284r, miR-450c-3p, miR-30b-3p, miR-654-3p, miR-363-5p, novel\_124, miR-483-3p, miR-2285l, miR-199b-5p, miR-106b-3p, miR-214-3p, miR-503-5p, miR-2411-3p, novel\_51, miR-2331-5p, miR-2404, miR-378g, novel\_69, miR-670-3p, novel\_68, miR-4792, miR-20a-3p, miR-7977, miR-450b-3p, miR-504, miR-412-3p, miR-1983, miR-2387, miR-199b-5p, miR-150-5p, miR-18a-3p, miR-216a-3p, miR-361-3p, miR-371b-3p, miR-1307-3p, miR-24-3p, miR-423-5p, miR-199b-5p, novel\_60, miR-3956-3p, miR-335-5p, miR-3957-3p, miR-495-3p, novel\_101, miR-128-1-5p, miR-335, miR-6123, miR-502-5p, miR-28c

miR-2285e, miR-1298-3p, miR-496-5p, miR-425-3p, miR-5010-3p, miR-548w, miR-1343-3p, miR-1839-5p, miR-2426, miR-450b-5p, miR-362-3p, miR-30b-3p, miR-1a-3p, miR-143-5p, miR-329-3p, miR-1b-5p, miR-2310, miR-8485, miR-30c-1-3p, miR-424-5p, miR-494-3p, miR-214-3p, miR-491-5p, miR-16b, miR-362-3p, miR-29b-1-5p, miR-1306-5p, miR-4443, miR-378g, miR-7977, miR-211-5p, miR-499b-5p, miR-452-3p, miR-544-5p, miR-335-3p, miR-493-5p, miR-140-5p, miR-361-3p, miR-423-5p, miR-361-3p, miR-452-5p, miR-6527, miR-2285f, miR-2447, miR-3059-5p, miR-4726-5p, miR-3968, miR-1973, miR-615, miR-2440, miR-2285n, novel\_83, miR-1247-5p, miR-15a-5p, miR-30d-3p, miR-548e-3p, miR-18a-3p, miR-34a-5p, miR-142-3p, miR-184-3p, miR-33b-3p, miR-362-3p, miR-2300b-3p, miR-380-3p, miR-486-3p, miR-125b-2-3p, miR-29b-1-5p, miR-2887, miR-216c-5p, miR-329a-5p, miR-34b-5p, miR-92a-1-5p, miR-324-3p, novel\_17, miR-15b-5p, miR-204-3p, miR-6130, miR-216b-5p, miR-296-3p, miR-140-5p, miR-30c-1-3p, miR-186-5p, miR-1827, let-7g-3p, miR-2312, miR-27b-5p, miR-6134, miR-3184-5p, miR-206-3p, miR-224-5p, miR-214, miR-3074-2-3p, miR-4510, miR-3074-5p, miR-3184-3p, miR-874-5p, miR-424-5p, miR-708-5p, miR-6516-3p, miR-487b-5p, miR-665, miR-29b-2-5p, miR-30a-3p, miR-324-3p, miR-30e-3p, miR-194-3p, miR-3431, miR-134-3p, miR-2285g, miR-188-5p, miR-2284x, miR-497-5p, miR-30b-3p, miR-16b, miR-21-5p, miR-380-3p, miR-1843b-5p, miR-542-3p, miR-873a-5p, miR-493-5p, miR-466f-3p, miR-1343-5p, miR-452-5p, miR-2285l, novel\_51, miR-224-5p, miR-669, miR-34b, miR-329-5p, miR-3074-5p, miR-195a-5p, miR-3065-5p, miR-18a-3p, miR-1306, miR-3970, miR-150-5p, miR-2285ab, miR-449a, miR-211, miR-2285x, miR-1a-1-5p, miR-502b, miR-206, miR-16a, miR-34c, miR-6402, miR-28c, miR-4324, miR-15a, miR-134-5p, miR-582-3p, miR-505-5p, miR-322-5p, miR-2427, miR-7134-5p, miR-1343-5p, miR-

miR-10a-5p, miR-200b-3p, miR-300, miR-2411-5p, miR-1271-5p, miR-24-2-5p, miR-339a, miR-217, miR-200c, miR-1260a, miR-543-5p, miR-181b-5p, miR-200c-3p, miR-2898, miR-181a-2-3p, miR-2284a, miR-1957a, miR-199a-5p, miR-3065-3p, miR-2478, miR-503-3p, miR-381-3p, miR-671-5p, miR-485-5p, miR-7144-5p, miR-10a-3p, miR-215-5p, miR-370-3p, miR-2284n, miR-199a-5p, miR-769, miR-409-3p, miR-3969, miR-99b-3p, miR-5100, miR-34c-3p, miR-28-5p, miR-374b, miR-145a-5p, miR-181a-5p, miR-873a-5p, miR-744-5p, miR-1260b, miR-30b-3p, miR-26b-3p, miR-130a-3p, miR-122-3p, miR-544b, miR-2355-3p, miR-432-5p, miR-2284d, miR-224-5p, miR-1343-5p, miR-125a-5p, miR-363-5p, miR-130b-5p, miR-654-3p, miR-378b, miR-2387, miR-6516-3p, miR-1291, miR-10a-5p, miR-655-5p, miR-2404, miR-323a-5p, miR-133a-5p, miR-199c, miR-147-5p, miR-22-5p, miR-128-1-5p, novel\_101, miR-542-5p, miR-136-3p, miR-326-3p, miR-3959-3p, miR-323c, miR-24-3p, miR-140-3p, miR-362-3p, miR-215-5p, miR-378d, miR-3600, miR-532-3p, miR-199a-3p, miR-200b, miR-125b, miR-216a-5p, miR-374a-5p, miR-542-5p, miR-196a-3p, miR-299-3p, miR-21-3p, miR-221-5p, miR-466i-5p, miR-2284m, miR-2411, miR-146a-5p, let-7f-1-3p, miR-21a-3p, novel\_99, miR-532-5p, miR-182-5p, miR-21-3p, miR-3065-3p, miR-221-5p, miR-155-5p, miR-22-3p, miR-193b-3p, miR-323-5p, miR-192-5p, miR-544-3p, miR-338-5p, miR-320e, miR-708-5p, miR-6516-3p, miR-155-5p, miR-2330-3p, miR-1271, miR-338-3p, miR-6134, miR-10b-5p, miR-30b-3p, miR-412-3p, miR-7857, miR-143-5p, miR-10b, miR-6529a, miR-2284aa, miR-450b-5p, miR-544a, miR-27a-3p, miR-222-5p, miR-362-3p, miR-2957, miR-326, miR-542-5p, miR-1839-3p, miR-199b-5p, novel\_94, miR-499b-5p, miR-27a-3p, miR-107-5p, miR-769-5p, miR-335, miR-450a-5p, miR-181d-5p, novel\_60, miR-154a, miR-330-5p, miR-23b-5p, miR-1343-5p, miR-199d, miR-155-5p, miR-412, novel\_79, miR-499-3p, miR-486-3p, miR-486b-3p, miR-138, miR-138-5p, miR-664a, novel\_19, miR-361-3p, miR-5126

FUNDC2 ENSOARGO(FUN14 domain) 3p, miR-129-1-3p, miR-421, miR-374c-3p, miR-3082-5p, miR-3074-1-3p, miR-493-5p, miR-378d, miR-2284x, miR-194-5p, miR-219a-2-3p, miR-23a-3p, miR-194b-5p, miR-493-5p, miR-885-5p, miR-129-2-3p, miR-3964, miR-127-5p, miR-219b-3p, miR-194a, miR-142b, miR-219-3p

TH ENSOARGO( tyrosine 664a, novel\_19, miR-361-3p, miR-5126

MCMBP ENSOARGO( minichromosome) 3p, miR-23a-3p, miR-194b-5p, miR-493-5p, miR-885-5p, miR-129-2-3p, miR-3964, miR-127-5p, miR-219b-3p, miR-194a, miR-142b, miR-219-3p

miR-2310, miR-124a, miR-382-3p, miR-106a-5p, miR-101b-3p, miR-153-3p, miR-29b-1-5p, miR-182-5p, miR-106b-5p, miR-1306-5p, miR-153, miR-181b-2-3p, miR-151a-3p, novel\_78, miR-16-2-3p, miR-2426, miR-501-3p, miR-412-3p, miR-502-3p, miR-374a-3p, miR-154-3p, miR-450a-5p, miR-500-3p, miR-7857-3p, miR-489, miR-181a-3p, miR-668-5p, miR-129b-5p, miR-2432, miR-664b-3p, miR-376a-5p, miR-181b-1-3p, miR-20a, miR-329a-5p, miR-2285w, miR-487a, miR-221-5p, miR-1277-5p, miR-106a, miR-345-3p, miR-1247-5p, miR-2284h-5p, miR-487a-3p, miR-148b-3p, miR-212-5p, miR-18a-3p, miR-106a, miR-361-5p, miR-124-3p, miR-1197-5p, miR-2366, miR-376a-5p, miR-122-5p, miR-129-2-3p, miR-500, miR-708-5p, miR-17-3p, miR-151-3p, miR-22-3p, miR-376e-3p, miR-154a-3p, miR-532-5p, miR-182-5p, miR-221-5p, miR-339b, miR-154b-3p, miR-500a-3p, miR-539-3p, miR-363-5p, miR-124-5p, novel\_51, miR-17-5p, miR-106a-5p, miR-2411-3p, miR-20b, miR-2355-3p, miR-412-5p, miR-3431, miR-339-5p, miR-188-5p, miR-22-3p, miR-3071-5p, miR-542-3p, novel\_27, miR-17-3p, miR-20a-5p, miR-28c, miR-144-3p, miR-677, miR-181b-3p, miR-2404, novel\_69, miR-329-5p, miR-1306, miR-18a-3p, miR-148a-3p, miR-29a-5p, miR-450c-5p, miR-28b, miR-152-3p, miR-543-5p, novel\_127, miR-17-3p, miR-2898, miR-200c-3p, miR-339a, miR-200c, miR-129-1-3p, novel\_79, miR-412, miR-429-3p, miR-7134-5p, miR-501-3p, miR-345-3p, miR-181c-3p, miR-93, miR-374a-3p, miR-374b-3p, miR-28-5p, miR-144, miR-3969, miR-5100, miR-376c-3p, miR-331-5p, miR-487a-3p, miR-874-3p, novel\_48, miR-20b-5p, miR-1814c, miR-1248, miR-329b, miR-93-5p, miR-3154, miR-17-5p, miR-30e-5p

miR-2285ab, miR-129b-5p, miR-96-5p, miR-107, miR-2284e, miR-9-3p, miR-378f, miR-195a-5p, miR-2319b, miR-25, miR-378e, miR-299b-3p, miR-454-5p, novel\_82, miR-15a, miR-769-5p, miR-16a, miR-2285y, miR-2284o, novel\_1, miR-656-5p, miR-885-5p, miR-2285f, miR-452-5p, miR-1193, miR-9-3p, miR-484, miR-378b, miR-1434-3p, miR-2113, miR-378c, miR-16b, miR-1388-5p, miR-26a-2-3p, miR-3120-5p, miR-31-5p, miR-103a-3p, miR-185-5p, miR-3431, novel\_116, miR-455-3p, miR-6238, miR-103, miR-16b, miR-196b-5p, miR-3955-3p, miR-660, miR-424-5p, miR-654-3p, miR-378d, miR-345-5p, miR-655, miR-2312, miR-345-5p, miR-345-5p, miR-485-5p, miR-378a-3p, miR-660-5p, miR-496-3p, miR-2355-5p, miR-370-5p, miR-141-3p, miR-27a-5p, miR-769, miR-6130, miR-877-5p, miR-15b-5p, novel\_63, miR-370-5p, miR-30e-3p, miR-30a-3p, miR-320e, miR-655-3p, novel\_74, miR-208b-5p, miR-592, miR-378c, miR-4510, miR-3184-3p, miR-1271, miR-16-5p, miR-769-5p, miR-378c, miR-378i, miR-196a-5p, miR-1290, miR-378a-3p, miR-582-3p, miR-218-1-3p, miR-496, miR-299a-3p, miR-2285ad, miR-548e-3p, miR-1224-5p, miR-7859, miR-322-5p, miR-15a-5p, miR-340-5p, miR-1271-5p, miR-378h, miR-1247-5p, miR-422a, miR-107, miR-200a-3p, miR-299-3p, miR-30a-3p, miR-495-5p, miR-369-3p, miR-345-3p, miR-2284f, miR-130a-5p, miR-29a-5p

PDK4 ENSOARGO( pyruvate

CHRNB3 ENSOARGO( choliner.

miR-1b-5p, miR-848b, miR-101b-3p, miR-214-3p, miR-153-3p, miR-146b, miR-505, miR-323b-3p, miR-199a-3p, miR-126a-5p, miR-1185-3p, miR-455-3p, miR-153, miR-425-3p, miR-145b, novel\_78, miR-330-3p, miR-101c, miR-21b, miR-323b, miR-541, miR-2284r, miR-7705, novel\_111, miR-361-3p, miR-2284j, miR-3956-3p, miR-2447, miR-490-5p, miR-3968, miR-499a-5p, miR-615, miR-2440, miR-101-3p, miR-1185-2-3p, miR-3596, miR-126b-5p, miR-2285u, miR-4792, miR-139-5p, miR-9-3p, miR-335-3p, miR-378j, miR-1306-3p, miR-381-3p, miR-380-3p, miR-143-3p, miR-486-3p, miR-376c-3p, miR-2285i, miR-376a-5p, miR-195a-3p, miR-500a-5p, miR-26a-5p, miR-30b, miR-16-1-3p, miR-184-3p, novel\_73, miR-217-5p, miR-2366, miR-30c-5p, miR-346, miR-214, miR-129-5p, novel\_74, miR-3604, miR-665, miR-664a-5p, miR-376e-3p, miR-2284s, miR-548o-3p, miR-2331-3p, miR-30c-1-3p, miR-1827, miR-129b-3p, let-7a-2-3p, miR-2284l, miR-2285r, miR-432-3p, miR-6240, miR-380-5p, miR-146a, miR-7-5p, novel\_116, miR-149-5p, miR-31-5p, miR-188-5p, miR-16-1-3p, novel\_23, miR-7b-5p, miR-2113, miR-19b-2-5p, miR-2284w, miR-1839-3p, miR-6123, miR-425-5p, miR-28c, miR-320c, miR-669, miR-144-3p, miR-3120-3p, miR-26b-5p, miR-2319a, miR-146b-5p, miR-3591-3p, miR-148a-3p, novel\_39, miR-200a-3p, miR-152-3p, miR-125a-3p, novel\_121, miR-2284z, miR-505-5p, miR-429-3p, miR-30c, miR-1343-5p, miR-1197-3p, miR-2284v, novel\_9, miR-2284k, novel\_63, miR-376c-3p, miR-2285aa, miR-3068-3p, miR-503-3p, miR-2318, miR-200a-5p, miR-301, miR-30e-5p, miR-30c-1-3p, miR-376b, miR-2330-5p, miR-1839-3p, miR-2957, novel\_103, miR-320b, miR-500-5p, miR-2320-3p, miR-2300a-5p, miR-409b, miR-3120-5p, miR-2284aa, miR-101a-5p, miR-143-5p, miR-6529a, miR-362-5p, miR-541-3p, novel\_60, miR-2285t, miR-30b-5p, miR-382-3p, miR-2285n, miR-454-5p, miR-7977, miR-20a-3p, novel\_94, miR-129b-

miR-154a, miR-2284j, miR-452-5p, miR-9-5p, miR-32-3p, miR-2284q, miR-490-5p, miR-2440, novel\_82, miR-376d, miR-27a-3p, miR-1185-2-3p, miR-489, miR-499a-3p, miR-7977, miR-20a-3p, miR-2284g, miR-1983, miR-369-5p, miR-376a-3p, miR-136-5p, miR-96-5p, miR-199b-5p, miR-140-5p, miR-2310, miR-2284b, miR-424-5p, miR-214-3p, miR-1468, miR-153-3p, miR-146b, miR-199b-5p, miR-3955-3p, miR-487b-5p, miR-491-5p, miR-16b, miR-29b-1-5p, miR-326, miR-1185-3p, miR-455-3p, miR-216a-3p, miR-376b-3p, miR-147a, miR-153, miR-27a-3p, miR-181b-2-3p, miR-330-3p, miR-16-2-3p, miR-2284aa, miR-2426, miR-1388-5p, miR-125b-2-3p, miR-1298-5p, miR-143-5p, miR-2284r, miR-181c-5p, miR-338-3p, miR-214, miR-2330-3p, miR-1271, miR-539-5p, miR-130b-5p, miR-424-5p, miR-1468-5p, miR-664a, novel\_74, miR-29b-2-5p, miR-664a-5p, miR-369-5p, miR-15b-5p, miR-155-5p, miR-192-5p, miR-499b-3p, miR-296-3p, miR-21-3p, miR-32-3p, miR-1827, novel\_99, miR-345-5p, miR-133b-3p, miR-487b-5p, miR-146a-5p, miR-181b-1-3p, miR-29b-1-5p, miR-345-3p, miR-195a-3p, miR-329a-5p, miR-21-3p, miR-466i-5p, miR-2284m, miR-26a-5p, miR-328-3p, novel\_83, miR-2284h-5p, miR-532-3p, miR-148b-3p, miR-200b, miR-15a-5p, miR-383-5p, miR-2284u, miR-16-1-3p, miR-140-3p, miR-1197-5p, miR-188-3p, miR-1246, miR-215-5p, miR-199b-5p, miR-2428, miR-326-3p, miR-128-1-5p, miR-16a, miR-2284o, miR-28c, miR-6529b, miR-15a, miR-181b-3p, miR-677, miR-670-3p, miR-26b-5p, miR-329-5p, miR-195a-5p, miR-6395, miR-146b-5p, miR-412-3p, miR-450b-3p, miR-1291, miR-216a-3p, miR-376b-3p, miR-3591-3p, miR-148a-3p, miR-345-5p, miR-296-3p, miR-654-3p, let-7f-2-3p, let-7f-2-3p, miR-6240, miR-130b-5p, miR-452-5p, miR-1343-5p, miR-124-5p, miR-330-3p, miR-146a, miR-296-3p, miR-2355-3p, miR-3431, miR-412-5p, miR-2284d, miR-27b-3p, miR-744-5p, miR-497-5p, miR-369-5p, miR-16-1-3p, miR-219a-1-3p, miR-2284ab, miR-205-5p, miR-181b-5p, miR-34b-5p, miR-181b-1-3p, miR-29a-5p, miR-2411, miR-2432, miR-3578, miR-124-3p, miR-5703, miR-148a-5p, miR-34a-5p, miR-2285ad, miR-1224-5p, miR-2411-5p, miR-545-5p, miR-331-3p, miR-3969, miR-665, miR-135a-5p, novel\_42, miR-4510, miR-6128, miR-181c-5p, miR-27b-5p, miR-129b-3p, miR-10b-3p, miR-1248, miR-582-5p, miR-186-5p, miR-874-3p, miR-2285aa, miR-34c-5p, miR-582-5p, miR-6130, novel\_25, miR-487b-5p, miR-153-3p, miR-124a, miR-2330-5p, miR-628-5p, miR-2113, miR-181a-5p, miR-1434-3p, miR-145a-5p, miR-450b-5p, miR-101a-5p, miR-101c, miR-145b, miR-181b-2-3p, miR-26b-3p, miR-153, miR-134-3p, miR-185-5p, miR-9788-3p, miR-148b-5p, miR-149-5p, miR-218-5p, miR-2440, miR-34c, miR-2285y, miR-6119-3p, miR-7134-3p, miR-203b-5p, miR-181d-5p, miR-449a, miR-9-3p, miR-140-5p, miR-409-5p, miR-21c, miR-147-3p, miR-136-5p, miR-9-3p, novel\_94, miR-135b-5p, novel\_68, miR-378g, miR-34b, miR-489, miR-677, miR-181b-3p

B3GALNT2 ENSOARGO(beta-1, 3

SNTB2 ENSOARGO(syntroph

miR-450a-1-3p, miR-487a-3p, miR-9-5p, miR-758-5p, miR-485-3p, miR-16-1-3p, miR-105-2, miR-2284u, miR-300, miR-2904, miR-5703, miR-23b-5p, miR-188-3p, miR-2366, miR-2284y, miR-2424, miR-2284a, miR-2285b, miR-380-3p, miR-2478, miR-181b-1-3p, miR-195a-3p, miR-216c-5p, miR-200a-3p, miR-17-3p, miR-181b-5p, miR-92a-1-5p, miR-22-3p, miR-324-5p, miR-544-3p, miR-331-5p, miR-6130, miR-139-5p, miR-141-3p, miR-140-5p, novel\_99, miR-27b-5p, miR-3154, miR-381-3p, miR-331-5p, miR-450a-1-3p, miR-181c-5p, miR-142a-5p, miR-3607-3p, miR-2330-3p, miR-4510, miR-31-3p, miR-204-5p, miR-450b-3p, miR-17-3p, miR-331-5p, miR-338-5p, miR-2284k, miR-455-3p, miR-9788-3p, miR-544b, miR-1298-3p, miR-134-3p, miR-142-5p, miR-181b-2-3p, miR-27a-3p, miR-105-1, miR-16-2-3p, miR-21b, miR-27b-3p, miR-3120-5p, miR-7862, miR-380-3p, miR-2284ab, miR-16-1-3p, miR-544a, miR-22-3p, miR-450c-3p, miR-194-5p, miR-181a-5p, miR-2284l, miR-2284b, miR-25-5p, miR-105-5p, miR-194a, miR-677, miR-27a-3p, miR-181b-3p, miR-378g, miR-3082-5p, miR-211-5p, miR-139-5p, miR-2284g, miR-7975, miR-1983, miR-6516-3p, miR-412-3p, miR-140-5p, miR-2284w, miR-211, miR-194b-5p, miR-181d-5p, miR-17-3p, miR-9-5p, miR-2285t, miR-3968, miR-485-3p, miR-26b-3p, miR-103a-3p, miR-235b-3p, miR-103, miR-134-3p, miR-185-5p, miR-145a-5p, miR-22-3p, miR-2113, miR-873a-5p, miR-7862, miR-744-5p, miR-497-5p, miR-1260b, miR-16b, miR-138, miR-30b-3p, miR-628-5p, miR-668-3p, miR-6240, novel\_51, miR-105-5p, miR-330-3p, miR-3141, miR-377-3p, miR-181b-3p, miR-6535, miR-669, miR-677, novel\_69, miR-146b-3p, miR-18a-3p, miR-3141, miR-18b, miR-195a-5p, miR-135b-5p, miR-19a-3p, miR-107, miR-1291, miR-335-5p, miR-342-3p, miR-301b-3p, novel\_27, miR-326-3p, miR-24-3p, miR-16a, miR-502-5p, miR-15a, miR-147-5p, miR-128-1-5p, miR-18b-5p, miR-6517, miR-214-5p, miR-322-5p, miR-330-5p, miR-615-3p, miR-105-2, miR-300, miR-490-3p, miR-200a, novel\_39, miR-1260a, miR-543-5p, novel\_96, novel\_127, miR-107, miR-127-5p, miR-450a-2-3p, miR-1271, miR-2355-5p, miR-574-5p, miR-154b-5p, miR-365a-3p, miR-18a, miR-381-3p, miR-671-5p, miR-485-5p, miR-7144-5p, miR-329a, miR-10b-3p, miR-193a-5p, miR-16-5p, miR-1197-3p, miR-1260b, miR-135a-5p, miR-331-3p, miR-2433, miR-486b-3p, miR-592, miR-138-5p, miR-181b-2-3p, miR-145b, miR-105-1, miR-1343-3p, miR-2300a-5p, miR-330-3p, miR-147a, miR-30b-3p, miR-541, miR-296-5p, miR-329-3p, miR-484, miR-1839-5p, miR-362-3p, miR-652-5p, miR-424-5p, miR-1388-3p, miR-8485, miR-16b, miR-362-3p, miR-5126, miR-326, miR-342, novel\_124, miR-491-5p, miR-2285u, miR-378g, miR-3596, miR-361-3p, miR-541-3p, miR-423-5p, miR-615, miR-2285n, miR-335, miR-4726-5p, miR-3960, miR-18a-3p, miR-15a-5p, miR-5703, miR-140-3p, miR-362-3p, novel\_133, miR-19b-3p, miR-184-3p, miR-486-3p, miR-181b-1-3p, miR-185-3p, miR-324-3p, miR-21-3p, miR-466i-5p, miR-552-3p, miR-15b-5p, miR-22-3p, miR-6130, miR-301a-3p, miR-2284s, miR-377-3p, miR-129b-3p, miR-1827, miR-18a-5p, miR-425-5p, miR-4510, miR-3184-5p, miR-6525, miR-665, miR-320e, miR-171-5p, miR-871-5p, miR-454-3p, miR-664a

RNF170 ENSOARGO(ring fin)

RAB1B ENSOARGO(RAB1B, m

CD164L2 ENSOARGOC CD164 si miR-4726-5p, miR-2898, miR-708-5p, miR-34b-5p, miR-28-5p, miR-2440, miR-28c, miR-324-3p, miR-34c, miR-28b, novel\_39, miR-449a, miR-2330-5p, miR-485-5p, miR-34a-5p, novel\_133, miR-2300b-3p, miR-378g, miR-34c-5p, miR-34b, miR-134-3p, miR-331-5p, novel\_9, miR-134-5p, miR-125b-5p, miR-100-3p, miR-1197-3p, miR-1260b, miR-16-5p, miR-345-5p, miR-331-5p, miR-30e-5p, miR-300-3p, miR-223-5p, miR-574-5p, miR-125a, miR-1271, miR-2285aa, miR-1a-2-5p, novel\_127, miR-200a-3p, miR-30f, miR-29a-5p, miR-200a, novel\_39, miR-3064-5p, miR-30c, miR-1290, miR-2427, miR-9-5p, miR-322-5p, miR-134-5p, miR-429-3p, miR-299a-3p, miR-2285ad, miR-18b-5p, miR-412, novel\_79, miR-29a, miR-6123, miR-1a-1-5p, miR-29c-3p, miR-3141, miR-3591-3p, miR-1306, miR-299b-3p, miR-669, miR-6535, miR-320c, miR-3120-3p, miR-378a-5p, miR-483-3p, miR-3141, miR-628-5p, miR-16b, miR-2284x, miR-27b-3p, miR-497-5p, miR-2113, miR-1843b-5p, miR-542-3p, novel\_23, miR-450c-3p, miR-3431, miR-134-3p, miR-412-5p, novel\_116, miR-149-5p, miR-194-3p, miR-31-5p, miR-339-5p, miR-487b-5p, miR-130b-5p, miR-874-5p, miR-4492, miR-30e-3p, miR-665, miR-664a-5p, miR-30a-3p, miR-346, miR-6525, miR-769-5p, miR-122-5p, miR-3184-5p, miR-3184-3p, miR-214, miR-665-5p, miR-339b, miR-345-5p, miR-186-5p, miR-543-3p, miR-625-5p, miR-2285c, miR-30d-5p, miR-487b-5p, miR-2284s, miR-15b-5p, miR-2331-3p, miR-2484, miR-210-5p, miR-30b, miR-92a-1-5p, miR-3601, miR-324-3p, miR-376a-5p, miR-143-3p, miR-486-3p, novel\_73, miR-34a-5p, miR-193b-5p, miR-30c-5p, miR-7859, miR-210-3p, miR-18a-3p, miR-212-5p, miR-30d-3p, novel\_82, novel\_111, miR-361-3p, miR-877-3p, miR-423-5p, miR-9-5p, miR-136-5p, miR-96-5p, miR-544-5p, miR-378g, miR-500-3p, miR-4443, miR-2319b, miR-214-3p, miR-16b, miR-29b-1-5p, miR-505, miR-101c, miR-541, miR-2284r, miR-501-3p, miR-1298-3p, miR-421, miR-199b-3p, miR-1343-3p, miR-138-5p, miR-486b-3p, miR-31-3p, miR-370-5p, miR-5100, miR-29b-3p, miR-1-5p, miR-409-3p, miR-26c, miR-1306-5p, miR-103b, miR-3607-3p, miR-6128, miR-18a, miR-320a, miR-769, miR-34c-5p, miR-154b-5p, miR-141-3p, miR-370-3p, miR-450b-3p, miR-378f, miR-2319a, miR-361-3p, miR-376b-5p, miR-670-3p, miR-3082-5p, miR-299b-3p, miR-323a-5p, miR-378e, novel\_68, miR-3064-5p, miR-499b-5p, miR-2285u, miR-2284q, miR-101-3p, miR-107-5p, miR-326-3p, miR-1285-5p, miR-9-5p, miR-378c, miR-2284x, miR-1434-3p, miR-4791, miR-378b, miR-450c-3p, miR-1298-3p, miR-3535, miR-2300a-5p, miR-378a-5p, miR-3085-3p, miR-103a-2-5p, miR-326, novel\_51, miR-197-5p, miR-654-3p, miR-378d, miR-101b-3p, miR-186-5p, miR-376c-5p, miR-450a-1-3p, miR-3154, miR-376c-5p, miR-500a-3p, miR-323-5p, miR-3068-3p, miR-378a-3p, miR-1271, miR-370-3p, novel\_74, miR-450b-3p, miR-500, miR-409-3p, miR-378c, miR-378c, miR-3074-2-3p, miR-103b, miR-2330-3p, miR-378i, miR-1197-5p, miR-330-5p, miR-378a-3p, miR-23b-5p, miR-378h, miR-9-5p, miR-486-5p, miR-450a-1-3p, miR-2284h-5p, miR-299a-3p, miR-3600, miR-1b-3p, miR-760-3p, miR-21-3p, miR-299-3p, miR-6119-5p, miR-422a, miR-216a-5p, miR-148b-5p, miR-29a-5p, miR-3064-5p

MYBL2 ENSOARGOC v-myb av 5p, miR-30a-3p, miR-346, miR-6525, miR-769-5p, miR-122-5p, miR-3184-5p, miR-3184-3p, miR-214, miR-665-5p, miR-339b, miR-345-5p, miR-186-5p, miR-543-3p, miR-625-5p, miR-2285c, miR-30d-5p, miR-487b-5p, miR-2284s, miR-15b-5p, miR-2331-3p, miR-2484, miR-210-5p, miR-30b, miR-92a-1-5p, miR-3601, miR-324-3p, miR-376a-5p, miR-143-3p, miR-486-3p, novel\_73, miR-34a-5p, miR-193b-5p, miR-30c-5p, miR-7859, miR-210-3p, miR-18a-3p, miR-212-5p, miR-30d-3p, novel\_82, novel\_111, miR-361-3p, miR-877-3p, miR-423-5p, miR-9-5p, miR-136-5p, miR-96-5p, miR-544-5p, miR-378g, miR-500-3p, miR-4443, miR-2319b, miR-214-3p, miR-16b, miR-29b-1-5p, miR-505, miR-101c, miR-541, miR-2284r, miR-501-3p, miR-1298-3p, miR-421, miR-199b-3p, miR-1343-3p, miR-138-5p, miR-486b-3p, miR-31-3p, miR-370-5p, miR-5100, miR-29b-3p, miR-1-5p, miR-409-3p, miR-26c, miR-1306-5p, miR-103b, miR-3607-3p, miR-6128, miR-18a, miR-320a, miR-769, miR-34c-5p, miR-154b-5p, miR-141-3p, miR-370-3p, miR-450b-3p, miR-378f, miR-2319a, miR-361-3p, miR-376b-5p, miR-670-3p, miR-3082-5p, miR-299b-3p, miR-323a-5p, miR-378e, novel\_68, miR-3064-5p, miR-499b-5p, miR-2285u, miR-2284q, miR-101-3p, miR-107-5p, miR-326-3p, miR-1285-5p, miR-9-5p, miR-378c, miR-2284x, miR-1434-3p, miR-4791, miR-378b, miR-450c-3p, miR-1298-3p, miR-3535, miR-2300a-5p, miR-378a-5p, miR-3085-3p, miR-103a-2-5p, miR-326, novel\_51, miR-197-5p, miR-654-3p, miR-378d, miR-101b-3p, miR-186-5p, miR-376c-5p, miR-450a-1-3p, miR-3154, miR-376c-5p, miR-500a-3p, miR-323-5p, miR-3068-3p, miR-378a-3p, miR-1271, miR-370-3p, novel\_74, miR-450b-3p, miR-500, miR-409-3p, miR-378c, miR-378c, miR-3074-2-3p, miR-103b, miR-2330-3p, miR-378i, miR-1197-5p, miR-330-5p, miR-378a-3p, miR-23b-5p, miR-378h, miR-9-5p, miR-486-5p, miR-450a-1-3p, miR-2284h-5p, miR-299a-3p, miR-3600, miR-1b-3p, miR-760-3p, miR-21-3p, miR-299-3p, miR-6119-5p, miR-422a, miR-216a-5p, miR-148b-5p, miR-29a-5p, miR-3064-5p

DSTYK ENSOARGOC dual ser 5p, miR-450a-1-3p, miR-3154, miR-376c-5p, miR-500a-3p, miR-323-5p, miR-3068-3p, miR-378a-3p, miR-1271, miR-370-3p, novel\_74, miR-450b-3p, miR-500, miR-409-3p, miR-378c, miR-378c, miR-3074-2-3p, miR-103b, miR-2330-3p, miR-378i, miR-1197-5p, miR-330-5p, miR-378a-3p, miR-23b-5p, miR-378h, miR-9-5p, miR-486-5p, miR-450a-1-3p, miR-2284h-5p, miR-299a-3p, miR-3600, miR-1b-3p, miR-760-3p, miR-21-3p, miR-299-3p, miR-6119-5p, miR-422a, miR-216a-5p, miR-148b-5p, miR-29a-5p, miR-3064-5p



|       |                      |                                                                                                                                                                                                                                                                                                                                                                                                                                                                                                                                                                                                                                                                                                                                                                                                                                                                                                                                                                                                                                                                                                                                                                                                                                                                           |
|-------|----------------------|---------------------------------------------------------------------------------------------------------------------------------------------------------------------------------------------------------------------------------------------------------------------------------------------------------------------------------------------------------------------------------------------------------------------------------------------------------------------------------------------------------------------------------------------------------------------------------------------------------------------------------------------------------------------------------------------------------------------------------------------------------------------------------------------------------------------------------------------------------------------------------------------------------------------------------------------------------------------------------------------------------------------------------------------------------------------------------------------------------------------------------------------------------------------------------------------------------------------------------------------------------------------------|
|       |                      | let-7c-3p, miR-363-5p, miR-432-3p, miR-29b-1-5p, miR-490-3p, miR-1271-3p, novel_39, miR-2432, miR-2285af, miR-455-5p, miR-3071-3p, miR-105-5p, miR-29b-1-5p, miR-3955-3p, miR-130b-3p, miR-2484, miR-152-3p, miR-21-3p, miR-105-1, miR-7641, miR-130a-3p, miR-134-3p, miR-148b-3p, miR-24-2-5p, miR-                                                                                                                                                                                                                                                                                                                                                                                                                                                                                                                                                                                                                                                                                                                                                                                                                                                                                                                                                                      |
| TERF2 | ENSOARGO(telomeri)   | 214-5p, miR-450a-1-3p, miR-1843b-5p, miR-5703, miR-21-5p, miR-455-5p, miR-105-2, miR-155-5p, miR-2285f, miR-301b-3p, miR-338-3p, novel_82, miR-33a-3p, miR-155-5p, miR-450b-3p, miR-454-3p, miR-378b, miR-7977, miR-655-5p, miR-411b-3p, miR-378g, miR-301a-3p, miR-155-5p, miR-148a-3p, miR-21a-3p, miR-2285ab, miR-21c, miR-3154, let-7g-3p, miR-2312, miR-186-5p, miR-409-5p, miR-381-3p, miR-136-5p, miR-299b-5p, miR-664b, miR-499b-5p, miR-25, miR-4443, miR-30b-5p, miR-3059-5p, miR-2447, miR-194b-5p, miR-452-5p, miR-2285f, novel_111, miR-423-5p, miR-4791, miR-296-5p, miR-7857, miR-450b-5p, miR-299a-5p, miR-101a-5p, miR-3120-5p, miR-199b-3p, miR-151a-3p, miR-2300a-5p, miR-330-3p, miR-1185-3p, miR-216a-3p, miR-106b-5p, miR-16b, miR-3955-3p, miR-106a-5p, miR-2330-5p, miR-424-5p, miR-1388-3p, miR-33a-5p, miR-23a-3p, miR-3187-3p, miR-299, miR-30d-5p, miR-411, miR-500a-3p, miR-27b-5p, miR-339b, miR-30f, miR-2312, miR-582-5p, miR-186-5p, miR-1827, miR-32-5p, miR-21-3p, miR-3065-3p, miR-656-3p, miR-2284s, miR-582-5p, miR-15b-5p, miR-204-3p, miR-30e-3p, miR-324-3p, miR-151-3p, miR-30a-3p, miR-19b-1-5p, miR-669a-3p, miR-130b-5p, miR-4492, miR-500, miR-424-5p, miR-590-3p, miR-2330-3p, miR-6525, miR-338-3p, miR-3184-5p, miR-122- |
| LYST  | ENSOARGO(lysosoma)   | 5p, miR-30c-5p, miR-1197-5p, miR-142-3p, miR-19b-3p, miR-2284u, miR-148a-5p, miR-34a-5p, miR-106a, miR-212-5p, miR-23c, miR-222-5p, miR-15a-5p, miR-23b-3p, novel_83, miR-374a-5p, miR-210-5p, miR-30b, miR-196a-3p, miR-185-3p, miR-345-3p, miR-219b-5p, miR-500a-5p, miR-324-3p, miR-106a, miR-299-3p, miR-30d, miR-34b-5p, miR-3653-3p, miR-345-3p, miR-20a, miR-380-3p, miR-486-3p, miR-2285ab, miR-19a-3p, miR-450b-3p, miR-195a-5p, miR-34b, miR-299b-3p, miR-2404, miR-20a-5p, miR-576-3p, miR-15a, miR-33a-3p, miR-34c, miR-16a, miR-6119-3p, miR-92a-3p, miR-199c, miR-495-3p, miR-449a, miR-19b-2-5p, miR-194-5p, miR-16b, miR-21-5p, miR-380-3p, miR-497-5p, miR-26b-3p, miR-339-5p, miR-3431, miR-3535, miR-20b, miR-194-3p, novel_116, miR-194a, miR-106a-5p, novel_51, miR-17-5p, miR-2411-3p, miR-330-3p, miR-32, miR-466f-3p, miR-6240, miR-130b-5p, miR-101-5p, miR-432-3p, miR-30e-5p, miR-23b, miR-17-5p, miR-92-5p, miR-20b-5p, miR-141-3p, miR-2285aa, miR-25-5p, miR-1388-5p, miR-29b, miR-544a, miR-128-3p, miR-484, miR-29d-3p, miR-2285g, miR-544b, miR-299a-3p, miR-330-3p, miR-3600, miR-17-3p, miR-760-3p, miR-299-3p, miR-224-5p, miR-330-3p, miR-148b-5p, miR-654-3p, miR-3065-3p, miR-494-3p, miR-                                         |
| CYB5B | ENSOARGO(cytochromo) | 6240, miR-23a-5p, miR-150-5p, miR-216a-3p, miR-29a-3p, miR-299b-3p, miR-3065-3p, miR-532-5p, miR-29a, miR-17-3p, miR-147-5p, miR-2285j, miR-29b-3p, miR-502-5p, miR-576-3p, miR-425-5p, miR-224-5p, miR-6134, miR-539-5p, miR-3184-3p, miR-29c-3p, miR-17-3p                                                                                                                                                                                                                                                                                                                                                                                                                                                                                                                                                                                                                                                                                                                                                                                                                                                                                                                                                                                                              |

miR-760-3p, miR-466i-5p, miR-34b-5p, miR-30b-3p, miR-221-5p, miR-21-3p, miR-26a-5p, miR-324-3p, miR-345-3p, miR-125b, miR-185-3p, miR-125b-2-3p, miR-486-3p, miR-503-5p, miR-2887, miR-345-3p, miR-142-3p, miR-16-1-3p, miR-34a-5p, miR-191, novel\_133, miR-1197-5p, miR-15a-5p, miR-1247-5p, miR-328-3p, miR-18a-3p, miR-4492, miR-500, miR-874-5p, miR-708-5p, miR-424-5p, miR-132-5p, miR-10b-5p, miR-3184-5p, miR-433-5p, miR-145a-3p, miR-214, miR-339b, miR-885-3p, miR-1827, novel\_99, miR-21a-3p, miR-500a-3p, miR-132-5p, miR-10a, miR-22-3p, miR-15b-5p, miR-30c-1-3p, miR-2331-3p, miR-221-5p, miR-370-5p, miR-21-3p, miR-552-3p, miR-532-5p, miR-3085-3p, miR-199b-5p, miR-214-3p, miR-342, miR-326, miR-1306-5p, novel\_19, miR-16b, miR-30c-1-3p, miR-424-5p, miR-3120-5p, miR-484, miR-296-5p, miR-541, miR-10b, miR-30b-3p, miR-1298-3p, miR-147a, miR-1343-3p, novel\_4, miR-330-3p, novel\_82, miR-218-5p, miR-2285n, miR-615, miR-2440, miR-371a-5p, miR-2285y, miR-361-3p, miR-877-3p, miR-423-5p, novel\_60, miR-541-3p, miR-3956-3p, miR-361-3p, miR-199b-5p, miR-378g, miR-203-3p, miR-3064-5p, miR-452-3p, miR-7689-3p, miR-7977, miR-126b-5p, miR-450a-2-3p, miR-2898, novel\_127, miR-543-5p, miR-125a-3p, miR-30c-2-3p, miR-339a, miR-28b, miR-199a-5p, miR-3064-5p, miR-2385-3p, miR-4286, miR-181a-2-3p, miR-885-3p, miR-10a-5p, miR-615-3p, miR-345-3p, miR-134, miR-1343-5p, miR-330-5p, miR-322-5p, miR-134-5p, miR-2285ad, miR-7641, novel\_79, miR-138-5p, miR-486b-3p, miR-134-5p, miR-191-5p, miR-28-5p, miR-2433, miR-370-5p, miR-125b-5p, miR-331-3p, miR-1197-3p, novel\_42, miR-16-5p, miR-876-3p, miR-329b, miR-485-5p, miR-34c-5p, miR-199a-5p, miR-370-3p, miR-2355-5p, miR-1271, miR-615-5p, miR-125a, miR-125a-5p, miR-1343-5p, miR-503-5p, miR-330-3p, novel\_51, miR-6240, miR-363-5p, miR-628-5p, miR-16b, miR-miR-9-5p, miR-449a, miR-371b-3p, let-7i, miR-34c, miR-769-5p, miR-1247-3p, miR-218-5p, miR-490-5p, miR-128-1-5p, let-7d-5p, miR-669, miR-6535, miR-34b, miR-299b-3p, miR-7857-3p, let-7e-5p, miR-493-5p, miR-147-3p, miR-668-3p, miR-493-5p, let-7a-5p, miR-296-3p, miR-4532, miR-365b-5p, miR-296-3p, miR-381-5p, let-7e, miR-214-3p, miR-25-5p, miR-2459, let-7g-5p, miR-147a, miR-19b-2-5p, miR-1839-5p, miR-381-5p, miR-214, miR-665-5p, miR-133a-3p, miR-193a-5p, let-7b, let-7b-5p, miR-365a-5p, miR-122-5p, miR-2903, miR-769-5p, miR-19b-1-5p, miR-324-3p, let-7f, miR-2433, miR-486b-3p, miR-296-3p, miR-3956, miR-574-5p, let-7i-5p, miR-769, miR-34c-5p, miR-133b-3p, miR-192-3p, miR-1271-3p, miR-486-3p, let-7g, let-7c-5p, miR-92a-1-5p, miR-185-3p, let-7k, miR-299-3p, miR-3653-3p, miR-34b-5p, miR-98-5p, miR-466i-5p, let-7f-5p, miR-299a-3p, miR-210-3p, miR-9-5p, miR-1197-5p, miR-193b-5p, miR-1961, miR-34a-5p, miR-133a-3p, miR-33b-3p, let-7d, miR-142-3p

AP5Z1

ENSOARGO(adaptor-

IGF2

ENSOARGO(insulin-

miR-147a, miR-455-3p, miR-1185-3p, miR-1343-3p, miR-548w, novel\_78, miR-1388-5p, miR-101c, miR-323b, miR-378d, miR-2310, miR-1388-3p, miR-23a-3p, miR-744-3p, novel\_19, miR-323b-3p, miR-378g, miR-2483-3p, miR-1185-2-3p, miR-139-5p, miR-2319b, miR-211-5p, miR-504, miR-335-3p, miR-361-3p, miR-877-3p, miR-423-5p, miR-2447, miR-6527, miR-3968, miR-490-5p, miR-23b-3p, miR-7859, miR-23c, miR-1247-5p, miR-18a-3p, miR-30d-3p, miR-16-1-3p, miR-378i, miR-2366, miR-378a-3p, miR-376a-5p, miR-486-3p, miR-2424, miR-143-3p, novel\_17, miR-324-3p, miR-422a, miR-345-3p, miR-216b-5p, miR-2331-3p, miR-504-5p, miR-345-5p, miR-186-5p, miR-299, miR-129b-3p, miR-346, miR-224-5p, miR-3184-5p, miR-3074-5p, miR-129-2-3p, miR-3958-5p, novel\_74, miR-4492, miR-129-5p, miR-130b-5p, miR-30e-3p, miR-30a-3p, miR-3431, miR-134-3p, miR-31-5p, miR-340-3p, miR-16-1-3p, miR-4508, miR-27b-3p, miR-188-5p, miR-432, miR-19b-2-5p, miR-223-3p, miR-2113, miR-22-3p, miR-432-3p, miR-432-3p, miR-668-3p, let-7f-2-3p, let-7f-2-3p, miR-106b-3p, miR-2285v, novel\_51, miR-2411-3p, novel\_69, miR-677, miR-320c, novel\_68, miR-3074-5p, miR-3120-3p, miR-410-5p, miR-378f, miR-376b-5p, miR-150-5p, miR-29c-3p, miR-29a, miR-134-5p, miR-129-1-3p, miR-2285ad, miR-6517, miR-1290, miR-1343-5p, miR-330-5p, novel\_39, miR-3064-5p, miR-127-5p, novel\_127, miR-200a-3p, miR-874-3p, miR-503-3p, miR-2285aa, miR-1271, miR-345-5p, miR-30e-5p, miR-23b, miR-376c-5p, let-7e-3p, miR-193a-5p, novel\_9, miR-134-5p, miR-592, miR-9788-3p, novel\_4, miR-27a-3p, miR-378c, miR-544a, miR-16-2-3p, miR-3120-5p, miR-484, miR-378b, miR-30b-3p, miR-193a, miR-4532, miR-376b, miR-3085-3p, miR-3955-3p, miR-320b, novel\_115, miR-326, miR-378e, miR-489, miR-27a-3p, miR-3064-5p, miR-541-5p, miR-147-3p, novel\_94, miR-877-3p, miR-361-3p, miR-129b-5p, miR-8005, miR-154a, miR-2285t, miR-

miR-4429, miR-124-3p, miR-30c-5p, miR-2284h-5p, miR-148b-3p, miR-30d-3p, miR-505-3p, miR-106a, miR-3960, miR-30d, miR-30b-3p, miR-320d, miR-106a, miR-345-3p, miR-324-3p, miR-2285p, miR-210-5p, miR-30b, miR-130a-5p, miR-125b-2-3p, miR-29b-1-5p, miR-20a, miR-2285w, miR-30f, miR-345-5p, miR-2312, miR-30d-5p, miR-2285c, miR-21a-3p, miR-544-3p, miR-377-3p, miR-499b-3p, miR-532-5p, miR-21-3p, miR-1277-3p, miR-130b-5p, miR-208b-5p, miR-708-5p, miR-664a, miR-665, miR-338-5p, miR-320e, miR-30a-3p, miR-324-3p, miR-2285j, miR-181c-5p, miR-224-5p, miR-346, miR-6525, miR-769-5p, miR-2330-3p, miR-1271, miR-3074-5p, miR-21b, miR-2284aa, miR-16-2-3p, miR-544a, miR-2426, miR-143-5p, miR-541, miR-2285e, miR-1298-3p, miR-539-5p, miR-199b-5p, miR-3085-3p, miR-106b-5p, miR-29b-1-5p, miR-431-5p, miR-320b, miR-8485, let-7c-3p, miR-106a-5p, miR-382-3p, miR-2330-5p, miR-124a, miR-1388-3p, miR-544-5p, miR-96-5p, miR-378j, miR-1306-3p, miR-199b-5p, miR-499a-3p, miR-211-5p, miR-7977, miR-499b-5p, miR-541-5p, miR-452-3p, miR-2319b, miR-3064-5p, miR-664b, miR-2285t, miR-769-5p, novel\_82, miR-30b-5p, miR-2285n, miR-154a, miR-194b-5p, miR-181d-5p, miR-2285f, miR-6527, miR-3956-3p, miR-885-5p, miR-541-3p, miR-212-3p, novel\_60, let-7a-2-3p, miR-30c, miR-300, miR-411-3p, miR-30a-5p, miR-218-2-3p, miR-1290, miR-3578, miR-3591-5p, miR-345-3p, miR-545-5p, miR-2284z, miR-1271-5p, miR-505-5p, miR-431, miR-152-3p, miR-181b-5p, miR-450a-2-3p, miR-3071-3p, miR-664-3p, miR-2285b, novel\_39, miR-29a-5p, miR-199a-5p, miR-380-5p, miR-2478, miR-450b-5p, miR-3064-5p, miR-30a-3p, miR-485-5p, miR-671-5p, miR-20b-5p, miR-7144-5p, miR-345-5p, let-7g-3p, miR-876-3p, miR-3154, miR-17-5p, miR-320a, miR-93-5p, miR-2448-3p, miR-381-3p, miR-30e-5p, miR-199a-5p, miR-223-5p, miR-769, miR-204-5p, miR-28-5p, miR-1306-3p, miR-93, miR-2318

HOOK3 ENSOARGO(hook mic:3p, miR-544-5p, miR-96-5p, miR-378j, miR-1306-3p, miR-199b-5p, miR-499a-3p, miR-211-5p, miR-7977, miR-499b-5p, miR-541-5p, miR-452-3p, miR-2319b, miR-3064-5p, miR-664b, miR-2285t, miR-769-5p, novel\_82, miR-30b-5p, miR-2285n, miR-154a, miR-194b-5p, miR-181d-5p, miR-2285f, miR-6527, miR-3956-3p, miR-885-5p, miR-541-3p, miR-212-3p, novel\_60, let-7a-2-3p, miR-30c, miR-300, miR-411-3p, miR-30a-5p, miR-218-2-3p, miR-1290, miR-3578, miR-3591-5p, miR-345-3p, miR-545-5p, miR-2284z, miR-1271-5p, miR-505-5p, miR-431, miR-152-3p, miR-181b-5p, miR-450a-2-3p, miR-3071-3p, miR-664-3p, miR-2285b, novel\_39, miR-29a-5p, miR-199a-5p, miR-380-5p, miR-2478, miR-450b-5p, miR-3064-5p, miR-30a-3p, miR-485-5p, miR-671-5p, miR-20b-5p, miR-7144-5p, miR-345-5p, let-7g-3p, miR-876-3p, miR-3154, miR-17-5p, miR-320a, miR-93-5p, miR-2448-3p, miR-381-3p, miR-30e-5p, miR-199a-5p, miR-223-5p, miR-769, miR-204-5p, miR-28-5p, miR-1306-3p, miR-93, miR-2318

C2orf73 ENSOARGO(chromosome miR-2318

miR-2483-3p, miR-10b, miR-2284g, miR-139-5p, novel\_94, miR-9-3p, miR-335-3p, miR-493-5p, miR-504, miR-378j, miR-181d-5p, miR-194b-5p, miR-2284j, miR-32-3p, miR-2284q, miR-374a-3p, miR-1973, miR-218-5p, miR-2285n, miR-2285e, miR-455-3p, miR-216a-3p, miR-147a, miR-27a-3p, novel\_78, miR-548w, miR-450b-5p, miR-101a-5p, miR-10b, miR-8485, miR-2284b, miR-33a-5p, miR-652-5p, miR-494-3p, miR-1388-3p, miR-487b-5p, miR-491-5p, miR-182-5p, miR-2957, miR-139-5p, miR-216b-5p, miR-376e-3p, miR-582-5p, miR-10a, miR-296-3p, miR-182-5p, miR-3065-3p, miR-216b-3p, miR-21-3p, miR-32-3p, miR-548o-3p, miR-504-5p, miR-140-5p, miR-625-5p, miR-133b-3p, miR-655, miR-411, miR-30d-5p, miR-2285c, let-7f-1-3p, miR-299, miR-21a-3p, miR-181c-5p, miR-122-5p, miR-98-3p, miR-6525, miR-10b-5p, miR-129-2-3p, miR-130b-5p, miR-669a-3p, novel\_74, miR-655-3p, miR-2285j, let-7b-3p, novel\_83, miR-2284h-5p, miR-340-5p, miR-7859, miR-548e-3p, miR-148a-5p, miR-361-5p, miR-2284u, miR-218-1-3p, miR-133a-3p, novel\_73, miR-33b-3p, miR-5703, miR-98-3p, miR-376a-5p, miR-2366, miR-2432, miR-376c-3p, miR-130a-5p, miR-376a-5p, miR-2285w, miR-3653-3p, miR-2284m, miR-345-3p, miR-92a-1-5p, miR-2285p, novel\_17, miR-208b-3p, miR-6535, miR-374c-3p, miR-2404, miR-10a-5p, miR-216b-3p, novel\_68, miR-450b-3p, miR-3591-3p, miR-378b, miR-3970, miR-376b-5p, miR-374c-5p, novel\_101, miR-495-3p, miR-2285x, novel\_120, novel\_1, miR-33a-3p, miR-208a-3p, miR-142b, miR-149-5p, miR-3431, miR-2285g, miR-26b-3p, miR-31-5p, miR-27b-3p, miR-2284x, miR-188-5p, miR-374b-3p, miR-194-5p, miR-7b-5p, miR-223-3p, miR-181a-5p, miR-296-3p, miR-432-3p, miR-432-3p, miR-382, miR-363-5p, miR-493-5p, miR-130b-5p, miR-466f-3p, miR-2411-3p, miR-194a, miR-296-3p, miR-7-5p, miR-2284n, miR-376c-3p, miR-324-5p, miR-2285aa, miR-574-5p, miR-376c-5p, novel\_48, miR-876-3p, miR-376c-5p, miR-

NFAT5      ENSOARGO(nuclear

miR-302-5p, miR-188a-5p, miR-188-5p, miR-319-5p, miR-188-3p, miR-222-5p, miR-485-3p, miR-548e-3p, miR-378d, miR-19b-3p, miR-4429, miR-1197-5p, miR-362-3p, miR-146a-5p, miR-216c-5p, miR-21-3p, miR-221-5p, miR-34b-5p, miR-320d, miR-155-5p, miR-204-3p, miR-6130, miR-6516, miR-3065-3p, miR-221-5p, novel\_99, miR-2312, miR-27b-5p, miR-21a-3p, miR-10b-5p, miR-3074-2-3p, miR-4510, miR-145a-3p, miR-708-5p, miR-208b-5p, miR-424-5p, miR-6516-3p, miR-664a, miR-155-5p, miR-17-3p, miR-450b-3p, miR-320e, miR-222-3p, miR-221-3p, miR-500-5p, miR-142-3p, miR-222-5p, miR-409b, novel\_4, miR-151a-3p, miR-450b-5p, miR-7857, miR-4791, miR-10b, miR-484, miR-3187-3p, miR-30c-1-3p, miR-33a-5p, miR-424-5p, miR-494-3p, miR-2330-5p, miR-3085-3p, miR-362-3p, miR-320b, miR-342, miR-20a-3p, miR-664b, miR-3064-5p, novel\_94, miR-877-3p, miR-199b-5p, miR-361-3p, miR-362-5p, miR-452-5p, miR-181d-5p, miR-2285f, miR-3059-5p, miR-2284q, miR-4726-5p, miR-769-5p, miR-371a-5p, miR-6516-5p, miR-222, miR-10a-5p, miR-300, miR-134, miR-345-3p, miR-2284a, miR-490-3p, miR-199a-5p, miR-3065-3p, miR-4286, miR-181a-2-3p, miR-30a-3p, miR-29b-2-5p, miR-543-5p, miR-107, miR-181b-5p, miR-17-3p, miR-30c-2-3p, miR-1260a, miR-199a-5p, miR-769, miR-34c-5p, miR-615-5p, miR-485-5p, miR-671-5p, miR-1814c, novel\_48, miR-7144-5p, miR-10b-3p, miR-320a, miR-362-5p, miR-381-3p, miR-145-3p, miR-500b-5p, miR-103b, miR-3607-3p, miR-1306-5p, miR-486b-3p, miR-28-5p, miR-204-5p, miR-135a-5p, miR-5100, miR-103, miR-185-5p, miR-130a-3p, miR-133b-5p, miR-219a-1-3p, miR-1260b, miR-380-3p, miR-374b-3p, miR-3071-5p, miR-145a-5p, miR-181a-5p, miR-345-5p, miR-296-3p, miR-654-3p, miR-2483-5p, miR-130b-5p, miR-452-5p, miR-124-5p, miR-670-3p, miR-34b, miR-10a-5p, miR-320b, miR-195a-5p, miR-135b-5p, miR-107, miR-19a-3p, miR-1291, miR-2387, miR-2285ab, novel\_27, miR-449a, miR-24-miR-186-5p, miR-1248, miR-1827, miR-23a-5p, miR-1895, miR-6130, miR-216b-5p, miR-141-3p, miR-221-5p, miR-204-5p, miR-31-3p, miR-29b-3p, miR-1-5p, miR-3184-5p, miR-1260b, miR-4510, miR-3074-5p, miR-1197-5p, miR-330-5p, miR-2427, miR-29d-3p, miR-1247-5p, miR-200a-3p, miR-221-5p, miR-1a-2-5p, miR-2898, miR-92a-1-5p, miR-324-3p, miR-3071-3p, novel\_17, miR-2285af, miR-1260a, miR-4286, miR-195a-3p, miR-216c-5p, miR-9-3p, miR-136-5p, miR-668-5p, miR-361-3p, miR-3082-5p, miR-29a-3p, miR-7-1-3p, miR-211-5p, miR-7977, miR-3074-5p, miR-29a, miR-128-1-5p, miR-326-3p, miR-423-5p, miR-9-3p, miR-323c, miR-211, miR-29c-3p, miR-452-5p, miR-1a-1-5p, miR-1260b, miR-29b, miR-421, miR-330-3p, miR-187-3p, miR-31-5p, miR-330-3p, miR-505, miR-326, miR-1b-5p, miR-494-3p, miR-6240

LRP2 ENSOARGOC low dens

DPYSL3 ENSOARGOC dihydro

miR-139-5p, miR-452-3p, miR-3082-5p, novel\_69, miR-140-5p, miR-147-3p, miR-410-5p, miR-335-5p, miR-1193, miR-9-5p, miR-326-3p, miR-4324, miR-335, miR-409b, miR-151a-3p, miR-1343-3p, miR-145b, miR-2285g, miR-2285e, miR-2355-3p, miR-145a-5p, miR-1388-5p, miR-1260b, miR-450b-5p, miR-2426, miR-539-3p, miR-1b-5p, miR-326, miR-125a-5p, miR-214-3p, miR-370-5p, miR-125a, miR-6516, miR-139-5p, miR-133c, miR-2285c, miR-200a-5p, miR-500a-3p, miR-129-2-3p, miR-3607-3p, miR-3958-5p, miR-214, miR-1260b, miR-370-5p, miR-151-3p, miR-125b-5p, miR-500, miR-486b-3p, miR-485-3p, miR-9-5p, miR-487a-3p, miR-758-5p, miR-6516-5p, miR-2284h-5p, miR-129-1-3p, miR-1434-5p, miR-330-5p, miR-216c-5p, miR-2285w, miR-195a-3p, miR-4286, miR-29a-5p, miR-486-3p, miR-1260a, novel\_17, miR-125b, miR-21-3p, miR-23b, miR-34b-5p, miR-1248, miR-574-5p, miR-1271, miR-125a, miR-133c, novel\_63, miR-125b-5p, miR-6740-5p, miR-1260b, miR-1197-3p, miR-1290, miR-196a-5p, miR-3591-5p, miR-330-5p, miR-429-3p, miR-299a-3p, miR-2285ad, miR-18b-5p, miR-1224-5p, miR-9-5p, miR-129-1-3p, miR-219-3p, miR-127-5p, let-7f-5p, miR-152-3p, miR-3064-5p, miR-148b-5p, miR-3956-5p, let-7g, miR-148a-3p, miR-150-5p, miR-1306, let-7e-5p, miR-2319a, miR-299b-3p, miR-411b-3p, miR-320c, miR-208a-3p, miR-28c, miR-576-3p, miR-485-3p, miR-29a, miR-206, miR-421-5p, miR-29c-3p, miR-199b-5p, miR-2113, miR-542-3p, miR-7b-5p, miR-19b-2-5p, miR-197-3p, miR-431-3p, miR-3955-5p, miR-31-5p, miR-134-3p, miR-149-5p, miR-194-3p, miR-7-5p, miR-365b-5p, miR-378a-5p, miR-196b-5p, miR-493-5p, let-7f-2-3p, miR-628-5p, let-7f-2-3p, miR-668-3p, miR-503-3p, let-7a-2-3p, miR-411, miR-500a-3p, miR-345-5p, miR-186-5p, miR-1827, miR-30c-1-3p, miR-504-5p, miR-552-3p, let-7i-5p, miR-30e-3p, let-7f, miR-151-3p, miR-219b-3p, miR-30a-3p, miR-130b-5p, miR-500, miR-129-5p, miR-129-2-3p, let-7b, miR-769-5p, miR-6525, miR-3184-5p, miR-122-5p, miR-193b-5p, miR-1961, miR-148a-5p, miR-30d-3p, miR-23c, miR-7859, miR-23b-3p, miR-210-5p, miR-208b-3p, miR-500a-5p, miR-3601, miR-98-5p, let-7k, miR-345-3p, miR-195a-3p, miR-664b-3p, miR-421-5p, miR-2424, miR-486-3p, miR-221, miR-378j, miR-504, miR-544-5p, miR-493-5p, miR-2319b, miR-3596, miR-378g, miR-4443, miR-1185-2-3p, miR-101-3p, miR-301a-5p, miR-499a-5p, miR-3956-3p, miR-9-5p, miR-877-3p, miR-423-5p, miR-301b-5p, miR-758-3p, miR-1a-3p, miR-1388-5p, miR-1839-5p, miR-1343-3p, miR-147a, miR-425-3p, miR-421, miR-1185-3p, miR-148b-5p, miR-153-3p, miR-199b-5p, miR-101b-3p, miR-574-3p, miR-23a-3p, miR-2310, miR-488-3p, miR-18a, miR-320a, let-7g-3p, miR-1814c, miR-671-5p, miR-485-5p, miR-7144-5p, miR-769, miR-199a-5p, miR-324-5p, miR-135a-1-3p, miR-

SKOR2 ENSOARGOC SKI fami

LGALS8 ENSOARGOC lectin,

miR-181a-2-3p, miR-2284f, miR-3529-3p, novel\_39, miR-200a, miR-3065-3p, miR-2284y, miR-192-3p, miR-450c-5p, miR-2284a, miR-450b-5p, miR-205-5p, miR-200c, miR-200a-3p, novel\_127, miR-17-3p, miR-127-5p, miR-181b-5p, miR-200c-3p, miR-376a-5p, miR-2285ad, miR-429-3p, miR-6517, miR-545-5p, miR-134-5p, miR-214-5p, miR-9-5p, miR-24-2-5p, miR-2411-5p, miR-501-3p, miR-330-5p, miR-345-3p, miR-3578, miR-134, miR-1290, miR-200b-3p, miR-582-3p, miR-193a-5p, miR-103b, miR-145-3p, miR-1197-3p, miR-409-3p, miR-2284k, miR-1306-3p, miR-486b-3p, miR-134-5p, miR-138-5p, miR-141-3p, miR-223-5p, miR-3965, miR-3959-5p, miR-3154, miR-320a, miR-7144-5p, miR-671-5p, miR-10b-3p, miR-345-5p, miR-2318, miR-628-5p, let-7f-2-3p, let-7f-2-3p, miR-130b-5p, miR-539-3p, miR-345-5p, miR-432-3p, miR-432-3p, miR-2284l, miR-105-5p, miR-2411-3p, miR-224-5p, miR-466f-3p, miR-378a-5p, miR-544b, miR-3431, miR-197-3p, miR-145a-5p, miR-19b-2-5p, miR-181a-5p, miR-1285, miR-188-5p, miR-30b-3p, miR-138, miR-2284ab, miR-21-5p, miR-219a-1-3p, miR-17-3p, miR-135a-2-3p, miR-326-3p, miR-2428, miR-2284o, miR-502b, novel\_1, miR-655-5p, miR-3120-3p, miR-378b, miR-320c, miR-677, miR-323a-5p, miR-21c, miR-3065-5p, miR-18a-3p, miR-2319a, miR-9851-3p, miR-376a-2-5p, miR-2284e, miR-183-5p, miR-216c-5p, miR-486-3p, miR-2411, miR-2424, miR-143-3p, miR-376a-5p, miR-130a-5p, miR-345-3p, miR-21-3p, miR-320d, miR-2284m, miR-1b-3p, miR-3600, miR-485-3p, miR-18a-3p, miR-7859, miR-487a-3p, miR-200b, miR-2904, miR-5703, miR-376a-5p, miR-2284u, miR-361-5p, miR-4429, miR-142-3p, miR-214, miR-665-5p, miR-425-5p, miR-3074-2-3p, miR-4510, miR-181c-5p, miR-338-3p, miR-224-5p, miR-19b-1-5p, miR-30a-3p, miR-655-3p, miR-338-5p, miR-2285j, miR-30e-3p, miR-500, miR-4492, miR-130b-5p, miR-17-3p, miR-3065-3p, miR-552-3p, miR-296-3p, miR-182-5p, miR-548c-3p, novel\_32, miR-544-



miR-708-5p, miR-17-3p, miR-324-3p, let-7b-5p, miR-6134, miR-1271, miR-539-5p, miR-4510, novel\_99, miR-582-5p, miR-2312, miR-133b-3p, let-7g-3p, miR-204-3p, miR-6516, miR-544-3p, miR-6130, miR-341-3p, miR-182-5p, miR-32-3p, miR-30b-3p, miR-299-3p, miR-21-3p, miR-106a, miR-320d, miR-125b, miR-125b-2-3p, miR-20a, miR-216c-5p, miR-4429, miR-5703, miR-1197-5p, miR-362-3p, miR-199a-3p, novel\_83, miR-532-3p, miR-200b, miR-3600, miR-374a-3p, miR-2284q, miR-2285f, miR-194b-5p, miR-3059-5p, novel\_60, miR-32-3p, miR-877-3p, let-7d-5p, miR-27a-3p, miR-3082-5p, miR-499b-5p, miR-20a-3p, miR-2285o, let-7e, miR-362-3p, miR-342, miR-320b, miR-1306-5p, let-7c-3p, let-7a-5p, miR-382-3p, miR-106a-5p, miR-16-2-3p, miR-2426, miR-544a, miR-7857, miR-30b-3p, miR-484, miR-4791, miR-9788-3p, miR-216a-3p, miR-27a-3p, miR-410-3p, miR-374b-3p, miR-28-5p, miR-486b-3p, miR-204-5p, miR-767-5p, miR-331-3p, miR-26c, miR-29b-3p, miR-93, miR-374a-3p, miR-133a-3p, miR-3074-1-3p, miR-7144-5p, miR-320a, miR-17-5p, miR-381-3p, miR-488-3p, miR-503-3p, miR-374c-3p, miR-141-3p, miR-17-3p, miR-200c-3p, let-7c-5p, miR-2285af, miR-200c, miR-490-3p, miR-2403, miR-200b-3p, miR-300, let-7d, miR-29d-3p, miR-3578, miR-6516-5p, miR-1271-5p, miR-7641, miR-502b, miR-147-5p, miR-128-1-5p, novel\_1, let-7i, miR-33a-3p, miR-20a-5p, novel\_27, miR-211, miR-24-3p, miR-3959-3p, miR-17-3p, miR-342-3p, novel\_120, miR-9851-3p, miR-1291, miR-2285ab, miR-2387, miR-146b-3p, miR-29a-3p, miR-655-5p, miR-1343-5p, miR-125a-5p, miR-330-3p, miR-106a-5p, miR-455-5p, miR-17-5p, miR-345-5p, miR-101-5p, miR-744-5p, miR-455-5p, miR-29b, miR-30b-3p, miR-194-5p, miR-873a-5p, miR-1434-3p, miR-20b, miR-544b, miR-432-5p, let-7g-5p, miR-665, miR-130a-3p, miR-133b-5p, miR-874-5p, miR-454-3p, miR-451a, miR-3604, let-7f, miR-214, let-7h, miR-3074-5p, miR-129-2-3p, miR-186-5p, miR-345-

miR-92a-1-5p, miR-3601, miR-324-3p, miR-34b-3p, miR-377-5p, miR-486-3p, miR-193b-5p, miR-2366, miR-33b-3p, miR-34a-5p, miR-18a-3p, miR-212-5p, miR-328-3p, miR-665, miR-874-5p, miR-4492, miR-3074-5p, miR-214, miR-3958-5p, miR-769-5p, miR-3184-5p, miR-345-5p, miR-339b, miR-1827, miR-885-3p, miR-1895, miR-30c-1-3p, miR-504-5p, miR-2331-3p, miR-296-3p, miR-552-3p, miR-216b-3p, miR-377-3p, miR-499b-3p, miR-582-5p, miR-15b-5p, miR-16b, miR-29b-1-5p, miR-491-5p, miR-214-3p, miR-381-5p, miR-199b-5p, miR-574-3p, miR-541, novel\_78, miR-181b-2-3p, miR-147a, miR-2459, miR-455-3p, novel\_82, miR-3968, miR-490-5p, miR-3956-3p, miR-2447, miR-877-3p, miR-361-3p, miR-423-5p, miR-504, miR-96-5p, miR-4792, miR-139-5p, miR-24-1-5p, miR-211-5p, miR-499a-3p, miR-378g, miR-8117, novel\_96, novel\_127, miR-3064-5p, miR-1343-5p, miR-885-3p, novel\_79, miR-1224-5p, miR-505-5p, miR-322-5p, miR-134-5p, miR-6740-5p, miR-125b-5p, miR-134-5p, novel\_42, miR-16-5p, miR-193a-5p, miR-1197-3p, miR-345-5p, miR-329b, miR-1248, miR-874-3p, miR-574-5p, miR-125a, miR-1271, miR-2355-5p, miR-542-5p, miR-331-5p, miR-377-3p, miR-7-5p, novel\_51, miR-378a-5p, miR-193a-3p, let-7j, miR-1843b-5p, miR-7b-5p, miR-432, miR-381-5p, miR-16b, miR-4508, miR-497-5p, miR-3955-5p, miR-340-3p, miR-339-5p, miR-134-3p, miR-149-5p, miR-28c, miR-1247-3p, miR-193b-3p, miR-1839-3p, miR-199b-5p, miR-1306, miR-3970, miR-410-5p, miR-3074-5p, novel\_68, miR-3120-3p, novel\_69, miR-374c-3p, miR-181b-3p, miR-6535, miR-669, miR-677, miR-542-5p, miR-125b, miR-185-3p, miR-466i-5p, miR-760-3p, miR-34b-5p, miR-30b-3p, miR-221-5p, miR-2887, miR-29b-1-5p, novel\_133, miR-5703, miR-1193, miR-2904, miR-378d, miR-1b-3p, miR-15a-5p, miR-532-3p, miR-29b-2-5p, miR-664a, miR-17-3p, miR-424-5p, miR-4510, miR-2330-3p, miR-1271, miR-6134, miR-21a-3p, miR-582-5p, novel\_99, miR-148a-3p, miR-152-3p, miR-410-3p, miR-148b-3p

EWSR1

ENSOARGOC EWS RNA

ARFIP1

ENSOARGOC ADP-ribo

miR-135a-2-3p, miR-193b-3p, miR-495-3p, miR-6123, miR-147-5p, miR-15a, miR-576-3p, miR-6529b, miR-16a, novel\_69, miR-677, miR-181b-3p, novel\_68, miR-320b, miR-450b-3p, miR-1291, miR-195a-5p, miR-150-5p, miR-18a-3p, miR-378b, miR-654-3p, miR-296-3p, miR-2483-5p, miR-483-3p, miR-193a-3p, miR-296-3p, novel\_51, miR-149-5p, miR-138, miR-30b-3p, miR-16b, miR-497-5p, miR-19b-2-5p, miR-873a-5p, miR-145a-5p, miR-16-5p, miR-138-5p, miR-486b-3p, miR-6740-5p, miR-365a-3p, miR-370-3p, miR-141-3p, miR-7144-5p, miR-485-5p, miR-488-3p, miR-301, miR-3154, miR-200a, novel\_39, novel\_127, miR-543-5p, novel\_96, miR-200a-3p, miR-2285af, miR-30c-2-3p, miR-322-5p, miR-483-3p, miR-1271-5p, miR-2411-5p, miR-129-1-3p, miR-885-3p, miR-3578, miR-423-5p, miR-2447, novel\_60, miR-3956-3p, miR-301a-5p, miR-203-3p, miR-7977, miR-96-5p, novel\_94, miR-140-5p, miR-361-3p, miR-30c-1-3p, miR-8485, miR-758-3p, miR-424-5p, miR-652-5p, miR-491-5p, miR-214-3p, miR-505, miR-2957, miR-16b, miR-455-3p, miR-2300a-5p, miR-1343-3p, miR-181b-2-3p, miR-145b, miR-1388-5p, miR-484, miR-301b-5p, miR-758-3p, miR-30b-3p, miR-6525, miR-3184-5p, miR-4510, miR-129-2-3p, miR-145a-3p, miR-1271, miR-2330-3p, miR-214, miR-424-5p, miR-4492, miR-874-5p, miR-19b-1-5p, miR-324-3p, miR-582-5p, miR-6130, miR-193b-3p, miR-204-3p, miR-15b-5p, miR-30c-1-3p, miR-2331-3p, miR-221-5p, miR-885-3p, miR-129b-3p, miR-181b-1-3p, miR-2411, miR-486-3p, miR-183-5p, miR-5100, miR-345-3p, miR-221-5p, miR-219b-5p, miR-500a-5p, miR-185-3p, miR-15a-5p, miR-532-3p, novel\_83, miR-18a-3p, miR-188-3p, miR-1291, miR-107, miR-1827, miR-877-3p, miR-129b-5p, miR-132-5p, miR-216b-3p, miR-552-3p, miR-26b-5p, miR-128-1-5p, miR-129-5p, miR-203b-5p, miR-2433, miR-6525, novel\_111, novel\_101, miR-941, miR-142-3p, miR-664-5p, miR-196a-5p, miR-126-3p, miR-2904, miR-412-3p, miR-3962, miR-188-3p, miR-2411-5p, miR-532-3p, miR-411-5p, miR-149-5p, miR-103, miR-214-5p, miR-103a-3p, miR-412, miR-491-5p, miR-196b-5p, miR-2898, miR-107, miR-30b-3p, novel\_96, novel\_17, miR-26a-5p, miR-2411, miR-363-5p, miR-4286, miR-3604, miR-769-5p, miR-365b-5p, miR-30b, miR-30b-5p, miR-30d, miR-127-5p, miR-212-3p, miR-365a-5p, miR-8485, miR-769-5p, miR-18a, miR-30d-5p, miR-30a-5p, miR-18b, miR-30e-5p, miR-30c-5p, miR-30c, miR-18a-5p, miR-30f, let-7g-3p, miR-18b-5p, novel\_78, miR-3955-5p, miR-455-3p, miR-769, miR-3596

EFNA1 ENSOARGO( ephrin-A

CCNL2 ENSOARGO( cyclin L

SMAD2 ENSOARGO( SMAD fam

miR-378e, miR-20a-3p, miR-211-5p, miR-668-5p, miR-9-3p, miR-335-3p, miR-199b-5p, miR-361-3p, miR-129b-5p, miR-154a, miR-3059-5p, miR-2447, miR-181d-5p, miR-2284j, miR-2285t, miR-218-5p, miR-2285y, miR-1298-3p, miR-9788-3p, miR-216a-3p, miR-409b, miR-1388-5p, miR-378c, miR-2284aa, miR-101c, miR-378b, miR-125b-2-3p, miR-30b-3p, miR-378d, miR-3187-3p, miR-2330-5p, miR-424-5p, miR-1388-3p, miR-130b-3p, miR-199b-5p, miR-1306-5p, miR-320b, miR-16b, miR-301a-3p, miR-155-5p, miR-15b-5p, miR-204-3p, miR-378a-3p, miR-532-5p, miR-370-5p, miR-345-5p, novel\_99, miR-186-5p, miR-543-3p, miR-21a-3p, miR-487b-5p, miR-129b-3p, miR-6134, miR-378c, miR-539-5p, miR-425-5p, miR-2330-3p, miR-6516-3p, miR-155-5p, miR-454-3p, miR-424-5p, miR-665, miR-15a-5p, miR-200b, miR-212-5p, miR-4429, miR-33b-3p, miR-19b-3p, miR-16-1-3p, miR-378i, miR-378a-3p, miR-5703, miR-217-5p, miR-377-5p, miR-486-3p, miR-503-5p, miR-216c-5p, miR-345-3p, miR-466i-5p, miR-320d, miR-21-3p, novel\_17, miR-26a-5p, miR-422a, miR-125b, miR-345-3p, miR-185-3p, miR-324-3p, miR-670-3p, miR-320c, novel\_68, miR-26b-5p, miR-19a-3p, miR-1291, miR-195a-5p, miR-378f, miR-6516-3p, miR-2319a, miR-1306, miR-24-3p, miR-211, miR-199b-5p, miR-301b-3p, miR-2428, miR-1193, miR-203b-5p, miR-502-5p, miR-15a, miR-16a, miR-503-5p, miR-2284d, miR-377-5p, miR-130a-3p, miR-219a-1-3p, miR-16-1-3p, miR-30b-3p, miR-16b, miR-2284ab, miR-497-5p, miR-2113, miR-7b-5p, miR-181a-5p, miR-432-3p, miR-2284l, miR-432-3p, miR-345-5p, miR-628-5p, miR-125a-5p, miR-7-5p, miR-503-5p, miR-2411-3p, miR-154b-5p, miR-199a-5p, miR-324-5p, miR-125a, miR-345-5p, miR-876-3p, miR-1248, miR-671-5p, miR-320a, miR-3154, miR-378c, miR-2284v, miR-16-5p, miR-204-5p, miR-134-5p, miR-486b-3p, miR-370-5p, miR-494-5p, miR-2284k, miR-125b-5p, miR-331-3p, miR-378h, miR-322-5p, miR-505-5p, miR-2284z, miR-134-5p, miR-129-3p, miR-107, miR-195a-5p, miR-6395, miR-378f, miR-1306, miR-378e, miR-154b-5p, miR-15b-5p, miR-378b, miR-378a-3p, miR-424-5p, miR-15a, miR-16a, miR-331-3p, miR-378c, miR-378c, miR-16-5p, miR-30b-3p, miR-16b, miR-378c, miR-497-5p, miR-4791, miR-378b, novel\_133, miR-378i, miR-378a-3p, miR-30b-3p, miR-15a-5p, miR-378h, miR-322-5p, miR-3535, miR-328-3p, miR-103, miR-149-5p, miR-103a-3p, novel\_124, miR-107, miR-1306-5p, miR-16b, miR-422a, miR-378d, miR-424-5p, miR-4286, miR-378g, miR-134-3p, miR-199a-5p, novel\_4, miR-30b-3p, miR-199b-5p, miR-30b-3p, miR-330-5p, miR-3184-5p, miR-199a-5p, miR-423-5p, miR-326-3p, miR-199b-5p, miR-128-1-5p, miR-760-3p, miR-199b-5p, miR-326, miR-185-3p, miR-30d, miR-544a, miR-30a-5p, miR-30d-5p, miR-30f, miR-30e-5p, miR-544b, miR-544-3p

ZNF550

ENSOARGO(zinc fin

WDTC1

ENSOARGO(WD and t

MED22

ENSOARGO(mediator

BECN1

ENSOARGO(becklin 1

miR-183-5p, miR-130a-5p, miR-2411, miR-2424, miR-2432, miR-196a-3p, miR-30b, miR-2285p, novel\_17, miR-500a-5p, miR-345-3p, miR-2284m, miR-760-3p, miR-466i-5p, miR-221-5p, miR-30d, miR-548e-3p, miR-23b-3p, miR-7859, miR-23c, miR-30c-5p, miR-193b-5p, miR-218-1-3p, miR-2284u, miR-148a-5p, miR-590-3p, miR-425-5p, miR-346, miR-181c-5p, miR-2285j, miR-19b-1-5p, miR-338-5p, miR-664a, miR-500, miR-454-3p, miR-669a-3p, miR-221-5p, miR-140-5p, miR-545-3p, miR-496-3p, miR-548o-3p, miR-6516, miR-301a-3p, miR-2284s, let-7f-1-3p, miR-500a-3p, miR-30d-5p, miR-18a-5p, miR-30f, miR-186-5p, novel\_99, miR-101b-3p, miR-23a-3p, miR-2284b, miR-3187-3p, miR-323b-3p, miR-3955-3p, miR-130b-3p, miR-2300a-5p, miR-199b-3p, miR-330-3p, miR-539-5p, miR-147a, miR-148b-5p, miR-1185-3p, miR-484, miR-2284r, miR-143-5p, miR-323b, miR-3059-5p, miR-885-5p, miR-181d-5p, miR-2284j, miR-9-5p, miR-30b-5p, miR-101-3p, miR-371a-5p, miR-2284g, miR-2319b, miR-211-5p, miR-1185-2-3p, miR-381-3p, miR-129b-5p, miR-99b-5p, miR-668-5p, miR-1983, miR-29b-2-5p, miR-181a-2-3p, miR-380-5p, miR-29a-5p, miR-200a, miR-2284y, miR-2284a, miR-2285b, miR-99a, miR-3071-3p, miR-181b-5p, miR-107, miR-200a-3p, miR-18b-5p, miR-9-5p, miR-758-5p, miR-2411-5p, miR-6516-5p, miR-545-5p, miR-134-5p, novel\_121, miR-345-3p, miR-134, miR-30a-5p, miR-300, miR-99a-5p, let-7a-2-3p, miR-496, miR-2284v, novel\_63, miR-410-5p, miR-2284k, miR-144, novel\_9, miR-204-5p, miR-134-5p, miR-370-3p, miR-141-3p, miR-374c-3p, miR-133c, miR-2284n, miR-381-3p, miR-2448-3p, miR-200a-5p, miR-18a, miR-23b, miR-100-5p, let-7g-3p, miR-23a-5p, miR-380-5p, miR-6240, miR-2483-5p, let-7f-2-3p, let-7f-2-3p, miR-432-3p, miR-296-3p, let-7a-2-3p, miR-296-3p, miR-330-3p, miR-99a-5p, miR-2411-3p, miR-452-5p, miR-187-3p, miR-103a-3p, miR-130a-3p, miR-412-5p, miR-2284d, miR-2421, miR-194-3p, miR-103, miR-2255-3p, miR-19b-2-3p, miR-2397-5p, miR-2484, miR-30b-3p, miR-221-5p, miR-216c-5p, miR-490-3p, miR-654-3p, miR-2285r, miR-2478, miR-140-3p, novel\_23, miR-542-3p, miR-450b-5p, miR-411-3p, miR-26b-3p, miR-5010-3p, miR-548w, miR-3960, miR-455-3p, miR-6516-5p, miR-338-5p, miR-2285j, miR-208b-5p, miR-379-3p, miR-495-3p, miR-2285f, miR-6128, miR-539-5p, miR-8095, miR-142a-5p, miR-361-3p, miR-3591-3p, miR-3065-5p, miR-137-3p, miR-200a-5p, miR-2285ab, novel\_48, miR-668-5p, miR-2312, miR-3963, miR-7-1-3p, miR-21-3p, miR-541-5p, miR-2285u, miR-221-5p, miR-6516

MBNL1 ENSOARGO(musclebl1

ACTN2 ENSOARGO(actinin,

miR-769-5p, miR-4726-5p, miR-2285t, miR-212-3p, miR-541-3p, miR-452-5p, miR-181d-5p, miR-362-5p, miR-502-3p, miR-361-3p, miR-129b-5p, novel\_94, miR-3064-5p, miR-452-3p, miR-10b, miR-7977, miR-3082-5p, miR-27a-3p, miR-454-5p, miR-342, novel\_103, miR-326, miR-1306-5p, miR-2957, miR-3085-3p, miR-542-5p, miR-424-5p, miR-652-5p, miR-30c-1-3p, miR-4532, miR-296-5p, miR-484, miR-10b, miR-7857, miR-30b-3p, miR-2426, miR-3120-5p, novel\_4, miR-27a-3p, miR-9788-3p, miR-500-5p, miR-17-3p, miR-664a, miR-424-5p, miR-708-5p, miR-208b-5p, miR-145a-3p, miR-4510, miR-10b-5p, miR-206-3p, miR-6134, miR-21a-3p, miR-133b-3p, miR-221-5p, miR-3065-3p, miR-182-5p, miR-532-5p, miR-6130, miR-22-3p, miR-542-5p, miR-125b, miR-185-3p, miR-466i-5p, miR-34b-5p, miR-30b-3p, miR-221-5p, miR-21-3p, miR-183-5p, miR-125b-2-3p, miR-2904, miR-5703, miR-19b-3p, miR-378d, miR-1b-3p, miR-383-5p, miR-148b-3p, miR-15a-5p, novel\_83, miR-15a, miR-6529b, miR-34c, miR-16a, miR-199c, miR-147-5p, miR-342-3p, miR-3957-3p, miR-17-3p, miR-542-5p, novel\_101, miR-211, miR-24-3p, miR-326-3p, miR-449a, miR-2428, miR-2387, miR-18a-3p, miR-1291, miR-19a-3p, miR-107, miR-195a-5p, miR-320b, miR-10a-5p, miR-2404, miR-146b-3p, miR-34b, miR-670-3p, miR-224-5p, miR-197-5p, miR-455-5p, miR-1343-5p, miR-125a-5p, miR-363-5p, miR-2483-5p, miR-345-5p, miR-1285, miR-181a-5p, miR-30b-3p, miR-219a-1-3p, miR-455-5p, miR-665, miR-377-5p, miR-2355-3p, miR-103, miR-551b-3p, miR-5100, miR-99b-3p, miR-331-3p, miR-26c, miR-767-5p, miR-486b-3p, miR-28-5p, miR-204-5p, miR-1306-5p, miR-6128, miR-133a-3p, miR-500b-5p, miR-145-3p, miR-362-5p, miR-23a-5p, miR-190a-3p, miR-485-5p, miR-370-3p, miR-34c-5p, miR-769, miR-6119-5p, miR-30c-2-3p, miR-2898, miR-17-3p, miR-181b-5p, miR-107, miR-543-5p, miR-3529-3p, miR-1, miR-4286, miR-28b, miR-2478, miR-3065-3p, miR-2284a, miR-1271-3p, miR-134, miR-501-

miR-1839-5p, miR-378c, miR-2426, miR-296-5p, miR-378b, miR-6529a, miR-484, miR-145b, miR-27a-3p, miR-105-1, miR-146b, miR-542-5p, miR-103a-2-5p, miR-214-3p, miR-3085-3p, miR-3955-3p, miR-29b-1-5p, miR-16b, miR-182-5p, miR-342, miR-1306-5p, miR-193a, miR-2310, miR-378d, miR-382-3p, miR-424-5p, miR-9-3p, miR-361-3p, miR-27a-3p, miR-499a-3p, miR-378e, miR-3064-5p, miR-490-5p, miR-107-5p, miR-1285-5p, miR-142-3p, miR-2904, miR-378a-3p, miR-378i, novel\_133, miR-193b-5p, miR-2366, miR-7859, miR-340-5p, miR-15a-5p, miR-148b-3p, miR-3600, miR-548e-3p, miR-18a-3p, miR-21-3p, miR-422a, miR-92a-1-5p, miR-542-5p, novel\_17, miR-146a-5p, miR-143-3p, miR-29b-1-5p, miR-183-5p, miR-885-3p, miR-625-5p, miR-1827, miR-133b-3p, miR-450a-1-3p, miR-15b-5p, miR-499b-3p, miR-377-3p, miR-370-5p, miR-182-5p, miR-378a-3p, miR-548o-3p, miR-4492, miR-424-5p, miR-450b-3p, miR-324-3p, miR-665, miR-664a-5p, miR-338-3p, miR-214, miR-539-5p, miR-378c, miR-497-5p, miR-27b-3p, miR-21-5p, miR-16b, miR-3432b, miR-1260b, miR-450c-3p, miR-3071-5p, miR-145a-5p, miR-2113, miR-185-5p, miR-133b-5p, miR-483-3p, miR-378a-5p, miR-105-5p, miR-365b-5p, miR-377-3p, miR-146a, miR-101-5p, miR-363-5p, miR-146b-5p, miR-195a-5p, miR-378f, miR-1291, miR-450b-3p, miR-1306, miR-18a-3p, miR-21c, miR-148a-3p, miR-6535, miR-670-3p, miR-3120-3p, miR-16a, miR-15a, miR-576-3p, novel\_27, miR-2284w, miR-24-3p, miR-323c, miR-1193, miR-542-5p, miR-342-3p, miR-885-3p, miR-23b-5p, miR-450a-1-3p, miR-322-5p, miR-483-3p, miR-378h, miR-7641, miR-152-3p, novel\_127, miR-1260a, miR-490-3p, miR-3064-5p, miR-1814c, miR-542-5p, miR-370-3p, miR-2355-5p, miR-1271, miR-592, miR-370-5p, miR-145-3p, miR-378c, miR-365a-5p, miR-1260b, miR-16-5p, miR-133a-3p

miR-137-3p, miR-424-3p, miR-301, miR-329a, miR-34b-5p, miR-1271, miR-125a, miR-874-3p, miR-3068-3p, miR-133c, miR-125b-5p, miR-16-5p, miR-193a-5p, miR-1260b, miR-330-5p, miR-1343-5p, miR-431, novel\_79, miR-2285ad, miR-9-5p, miR-322-5p, miR-125a-3p, miR-664-3p, miR-200a-3p, miR-152-3p, miR-200a, miR-216a-3p, miR-3970, miR-148a-3p, miR-3141, miR-378f, miR-146b-5p, miR-2319a, miR-410-5p, miR-3074-5p, miR-216b-3p, miR-144-3p, miR-669, novel\_69, miR-485-3p, miR-421-5p, miR-29a, miR-29c-3p, miR-301b-3p, miR-22-3p, miR-7b-5p, miR-223-3p, miR-2284x, miR-26a-2-3p, miR-497-5p, miR-16-1-3p, miR-16b, miR-339-5p, miR-103a-3p, miR-3955-5p, miR-194-3p, miR-149-5p, miR-134-3p, miR-2411-3p, miR-3141, miR-365b-5p, miR-146a, miR-7-5p, miR-378a-5p, miR-493-5p, miR-6240, miR-2285c, miR-345-5p, miR-339b, miR-15b-5p, miR-301a-3p, miR-582-5p, miR-10a, miR-664a-5p, miR-30a-3p, miR-30e-3p, miR-130b-5p, miR-129-5p, miR-4492, miR-454-3p, novel\_74, miR-665-5p, miR-214, miR-3958-5p, miR-3074-5p, miR-122-5p, miR-346, miR-378a-3p, miR-378i, miR-361-5p, miR-16-1-3p, miR-33b-3p, miR-422a, miR-345-3p, miR-324-3p, novel\_17, miR-210-5p, miR-345-3p, miR-2285i, miR-409-5p, miR-140-5p, miR-493-5p, miR-136-5p, miR-211-5p, miR-2319b, miR-24-1-5p, miR-4443, miR-378g, miR-218-5p, miR-9-5p, miR-3956-3p, miR-2447, miR-877-3p, miR-541, miR-329-3p, miR-362-3p, miR-145b, miR-1343-3p, miR-2459, miR-147a, miR-539-5p, miR-16b, miR-29b-1-5p, miR-431-5p, miR-103a-2-5p, miR-214-3p, miR-146b, miR-130b-3p, miR-1388-3p, miR-124a, miR-574-3p, miR-378d, miR-3154, novel\_48, miR-23a-5p, miR-141-3p, miR-370-3p, miR-331-3p, miR-144, miR-5100, miR-29b-3p, miR-374b-3p, miR-204-5p, miR-31-3p, miR-138-5p, miR-145-3p, miR-378c, miR-365a-5p, miR-374a-3p, miR-29d-3p, miR-345-3p, miR-10a-5p, miR-128-3p, miR-582-3p, miR-378b, miR-329a, miR-1260a, miR-543-5p, miR-



miR-219-3p, miR-664-3p, miR-30c-2-3p, let-7c-5p, miR-217, miR-450a-2-3p, miR-181b-5p, miR-6536, let-7f-5p, miR-3529-3p, miR-1, miR-2478, miR-29a-5p, let-7g, let-7d, miR-582-3p, miR-155-5p, miR-299a-3p, miR-6517, miR-376a-5p, miR-545-5p, novel\_121, miR-410-5p, miR-125b-5p, miR-331-3p, miR-410-3p, miR-374b-3p, miR-1306-5p, miR-3607-3p, miR-6128, miR-193a-5p, miR-500b-5p, miR-323-3p, miR-374a-3p, miR-2448-3p, miR-301, miR-503-3p, miR-137-3p, miR-3154, miR-23b, miR-362-5p, miR-10b-3p, miR-345-5p, miR-2318, miR-329a, miR-3074-1-3p, miR-1814c, miR-503-3p, miR-2355-5p, miR-125a, miR-331-5p, miR-300-3p, miR-769, miR-223-5p, miR-146a, miR-377-3p, miR-190a, miR-197-5p, miR-105-5p, miR-106b-3p, miR-452-5p, miR-125a-5p, miR-466f-3p, miR-493-5p, miR-101-5p, miR-654-3p, miR-2285r, miR-345-5p, miR-181a-5p, miR-2113, miR-3071-5p, miR-21-5p, miR-26a-2-3p, miR-665, miR-185-5p, let-7g-5p, miR-2355-3p, miR-4324, miR-3613, miR-33a-3p, let-7i, miR-206, novel\_1, miR-335-5p, novel\_27, miR-2285ab, miR-2387, miR-21c, miR-450b-3p, miR-412-3p, miR-146b-5p, miR-6516-3p, let-7e-5p, miR-376a-2-5p, miR-378b, miR-320b, miR-146b-3p, miR-2404, miR-299b-3p, miR-210-5p, novel\_17, miR-618, miR-500a-5p, miR-125b, miR-98-5p, miR-466i-5p, miR-299-3p, let-7k, miR-216c-5p, miR-376a-5p, miR-664b-3p, miR-29b-1-5p, miR-146a-5p, novel\_133, miR-1961, miR-362-3p, miR-2300b-3p, miR-193b-5p, miR-376a-5p, miR-1197-5p, miR-5703, miR-217-5p, novel\_73, miR-148a-5p, miR-548e-3p, miR-23b-3p, miR-7859, miR-340-5p, miR-23c, let-7f, miR-2285j, miR-219b-3p, miR-320e, miR-3604, miR-664a-5p, miR-155-5p, miR-6516-3p, miR-190a-5p, miR-208b-5p, miR-129-5p, miR-669a-3p, miR-590-3p, let-7b, miR-145a-3p, miR-3184-3p, miR-3074-2-3p, miR-769-5p, miR-206-3p, let-7b-5p, miR-338-3p, miR-181c-5p, miR-21a-3p, miR-3613-5p, miR-27b-5p, miR-129b-3p, let-7g-3p, miR-345-3p, miR-221-5p, miR-664-3p, miR-412-5p, miR-185-3p, miR-664b-3p, miR-450b-5p, miR-142a-3p, miR-329a-5p, miR-503-5p, miR-3529-3p, novel\_133, miR-193b-5p, miR-2366, miR-708-5p, miR-28-5p, miR-2285j, miR-2332, miR-6740-5p, miR-320e, miR-142a-5p, miR-145-3p, miR-3184-5p, miR-876-3p, miR-129b-3p, miR-300-3p, miR-365a-3p, novel\_32, miR-221-5p, miR-216b-3p, miR-542-5p, miR-615-5p, miR-182-5p, miR-341-3p, miR-503-5p, miR-342, miR-5126, novel\_19, miR-182-5p, miR-4508, miR-744-5p, miR-503-5p, miR-142-3p, miR-142-5p, miR-194-3p, miR-411b-5p, novel\_4, miR-2300a-5p, miR-409b, miR-128-1-5p, miR-7134-3p, miR-412-5p, miR-1247-3p, miR-6529b, miR-361-3p, miR-423-5p, miR-342-3p, miR-135a-2-3p, miR-4454, miR-2387, miR-3065-5p, miR-25, miR-3596, novel\_68, miR-664b

SUCNR1 ENSOARGO(succinat

COPG1 ENSOARGO(coatomer

miR-424-5p, miR-664a, miR-664a-5p, let-7f, let-7b-5p, miR-6134, miR-3958-5p, miR-2330-3p, let-7b, miR-4510, miR-1827, miR-204-3p, let-7i-5p, miR-877-5p, miR-15b-5p, miR-6130, miR-182-5p, miR-504-5p, miR-3653-3p, miR-2484, let-7k, miR-106a, miR-98-5p, miR-125b, miR-196a-3p, miR-29b-1-5p, miR-20a, miR-2904, miR-1961, miR-1247-5p, miR-616-3p, miR-15a-5p, miR-148b-3p, miR-212-5p, miR-505-3p, miR-106a, miR-499a-5p, miR-1973, miR-107-5p, miR-382-3p, miR-2285n, miR-877-3p, miR-9-5p, novel\_60, miR-3059-5p, miR-2447, miR-3956-3p, miR-504, miR-361-3p, miR-199b-5p, miR-221, let-7d-5p, miR-4443, miR-27a-3p, miR-378g, miR-2483-3p, miR-199b-5p, let-7e, miR-103a-2-5p, miR-29b-1-5p, miR-16b, miR-106b-5p, miR-182-5p, miR-431-5p, miR-676-3p, let-7a-5p, miR-106a-5p, miR-382-3p, miR-424-5p, miR-7857, miR-125b-2-3p, miR-6529a, miR-143-5p, miR-221-3p, miR-216a-3p, miR-421, miR-147a, miR-27a-3p, novel\_78, miR-125b-5p, miR-410-5p, miR-365a-5p, miR-93, miR-16-5p, miR-6128, miR-20b-5p, miR-671-5p, miR-485-5p, miR-10b-3p, miR-93-5p, miR-17-5p, miR-488-3p, miR-199a-5p, miR-154b-5p, miR-370-3p, miR-1271, miR-125a, miR-152-3p, miR-2898, let-7f-5p, miR-3071-3p, let-7c-5p, miR-205-5p, miR-2397-5p, let-7g, miR-29a-5p, miR-199a-5p, miR-128-3p, let-7d, miR-2427, miR-196a-5p, miR-322-5p, miR-9-5p, miR-431, miR-16a, let-7i, miR-4324, miR-15a, miR-20a-5p, miR-133a-5p, miR-199b-5p, miR-323c, novel\_101, novel\_120, miR-7975, miR-505-3p, miR-195a-5p, let-7e-5p, miR-410-5p, miR-216a-3p, miR-2387, miR-148a-3p, miR-125a-5p, miR-196b-5p, miR-378a-5p, miR-365b-5p, miR-106a-5p, miR-17-5p, miR-296-3p, miR-296-3p, miR-654-3p, miR-628-5p, miR-497-5p, miR-27b-3p, miR-16b, miR-219a-1-3p, miR-432, miR-708-3p, miR-873a-5p, miR-1843b-5p, miR-2355-3p, miR-20b, miR-432-5p, miR-412-5p, miR-185-5p, miR-134-3p, let-7c-5p, miR-3955-5p, miR-133b-5p, miR-122-3p

novel\_9, miR-331-5p, miR-592, novel\_63, miR-125b-5p, miR-1260b, miR-16-5p, miR-876-3p, miR-329b, miR-331-5p, miR-301, miR-874-3p, miR-2285aa, miR-2355-5p, miR-125a, miR-127-5p, novel\_96, miR-152-3p, miR-200a-3p, miR-29a-5p, miR-200a, miR-3956-5p, miR-885-3p, miR-155-5p, miR-3591-5p, miR-1343-5p, miR-330-5p, miR-9-5p, miR-505-5p, miR-322-5p, miR-450a-1-3p, novel\_121, miR-299a-3p, miR-2285ad, miR-429-3p, miR-1224-5p, miR-412, miR-18b-5p, miR-625-3p, miR-6123, miR-4324, miR-576-3p, miR-28c, miR-199b-5p, miR-193b-3p, miR-410-5p, miR-146b-5p, miR-2319a, miR-148a-3p, miR-3970, miR-299b-3p, miR-144-3p, miR-6535, novel\_68, miR-329-5p, miR-193a-3p, miR-377-3p, miR-582, miR-146a, miR-2285v, miR-105-5p, miR-2411-3p, miR-432-3p, miR-2284l, miR-493-5p, miR-6240, miR-16b, miR-16-1-3p, miR-26a-2-3p, miR-542-3p, miR-1843b-5p, miR-197-3p, miR-450c-3p, miR-103a-3p, miR-129-5p, miR-874-5p, miR-4492, miR-130b-5p, miR-664a-5p, miR-6525, miR-3184-5p, miR-122-5p, miR-181c-5p, miR-3958-5p, miR-543-3p, miR-885-3p, miR-186-5p, miR-450a-1-3p, miR-411, miR-377-3p, miR-582-5p, miR-15b-5p, miR-2331-3p, miR-1277-3p, miR-216b-3p, miR-552-3p, miR-618, miR-219b-5p, miR-324-3p, miR-500a-5p, miR-345-3p, miR-376a-5p, miR-664b-3p, miR-377-5p, miR-486-3p, miR-143-3p, miR-329a-5p, miR-142-3p, miR-16-1-3p, miR-2366, miR-7859, miR-210-3p, miR-328-3p, miR-212-5p, miR-499a-5p, miR-628-3p, miR-490-5p, miR-101-3p, miR-2440, miR-361-3p, miR-877-3p, miR-423-5p, miR-7705, miR-2447, miR-9-5p, miR-99b-5p, miR-668-5p, miR-493-5p, miR-381-3p, miR-378j, miR-203-3p, miR-139-5p, miR-7689-3p, miR-211-5p, miR-491-5p, miR-146b, miR-153-3p, miR-199b-5p, miR-505, miR-16b, miR-2310, miR-124a, miR-1388-3p, miR-744-3p, miR-1839-5p, miR-758-3p, miR-153, miR-147a, miR-455-3p, miR-126a-5p, miR-320-3p, miR-1242-3p, miR-145b, miR-486b-3p, miR-204-5p, miR-216c-5p, miR-424-5p, miR-16-5p, miR-1193, miR-143-3p, miR-15a, miR-370-5p, miR-16a, miR-16b, miR-127-5p, miR-487b-5p, miR-424-5p, miR-2285t, miR-21-3p, miR-370-5p, miR-322-5p, miR-15a-5p, miR-6238, miR-216a-3p, miR-2459, miR-15b-5p, miR-21a-3p, miR-140-5p, miR-16b, miR-329b, miR-497-5p, miR-2319a, miR-195a-5p, miR-377-3p, miR-324-5p, novel\_32, miR-199a-5p, miR-21-3p, miR-125a, miR-2312, miR-339b, miR-23b, miR-3184-5p, miR-6134, miR-664a, miR-125b-5p, miR-665, miR-23b-3p, miR-23c, miR-328-3p, miR-6517, novel\_79, miR-493-3p, miR-2300b-3p, miR-2366, miR-330-5p, miR-140-3p, miR-125b-2-3p, miR-199a-5p, miR-490-3p, novel\_96, miR-125a-3p, miR-542-5p, miR-324-3p, miR-216a-5p, miR-339a, miR-125b, miR-320b, miR-3120-3p, miR-1291, miR-9851-3p, miR-6395, miR-2285ab, miR-361-3p, miR-199b-5p, miR-3591-3p, miR-361-3p, miR-24-3p, miR-326-3p, miR-423-5p, miR-2428, miR-199b-5p, miR-342-3p, miR-541-3p, miR-2285f, miR-542-5p, novel\_101, miR-4324, novel\_78, miR-339-5p, miR-4508, miR-541, miR-432-3p, miR-4532, miR-23a-3p, miR-491-5p, miR-125a-5p, miR-199b-5p, miR-542-5p, miR-342, miR-326, miR-377-3p, novel\_51

|        |                    |                                                                                                                                                                                                                                                                                                                                                                                                                                                                                                                                                                                                                                                                                                                                                                                                                                                                                                                                                                                                                                                                                                                                                                                                                                                                                                                                                                                                                                                                                                                                                                                                                                                                                             |
|--------|--------------------|---------------------------------------------------------------------------------------------------------------------------------------------------------------------------------------------------------------------------------------------------------------------------------------------------------------------------------------------------------------------------------------------------------------------------------------------------------------------------------------------------------------------------------------------------------------------------------------------------------------------------------------------------------------------------------------------------------------------------------------------------------------------------------------------------------------------------------------------------------------------------------------------------------------------------------------------------------------------------------------------------------------------------------------------------------------------------------------------------------------------------------------------------------------------------------------------------------------------------------------------------------------------------------------------------------------------------------------------------------------------------------------------------------------------------------------------------------------------------------------------------------------------------------------------------------------------------------------------------------------------------------------------------------------------------------------------|
| AP1G1  | ENSOARGO(adaptor)  | miR-1a-3p, miR-323b, miR-301b-5p, miR-541, miR-484, miR-3120-5p, miR-16-2-3p, miR-2426, miR-145b, miR-2459, miR-421, miR-1185-3p, miR-9788-3p, miR-455-3p, miR-216a-3p, miR-142-5p, miR-323b-3p, miR-199b-5p, miR-3085-3p, miR-376b, miR-101b-3p, miR-124a, miR-2310, miR-199b-5p, miR-877-3p, miR-335-3p, miR-3064-5p, miR-139-5p, miR-1185-2-3p, miR-203-3p, miR-3082-5p, miR-301a-5p, miR-371a-5p, miR-154-3p, miR-7134-3p, miR-490-5p, miR-541-3p, miR-3059-5p, miR-423-5p, miR-877-3p, miR-5703, miR-217-5p, miR-124-3p, miR-2904, miR-191, miR-378d, miR-19b-3p, miR-30d-3p, miR-485-3p, miR-3600, miR-487a-3p, miR-125b, miR-216a-5p, miR-3653-3p, miR-466i-5p, miR-195a-3p, miR-487a, miR-625-5p, miR-154b-3p, miR-18a-5p, miR-216b-3p, miR-154a-3p, miR-21-3p, miR-660-5p, miR-139-5p, miR-301a-3p, miR-665, miR-30a-3p, miR-30e-3p, miR-130b-5p, miR-454-3p, miR-487a-5p, miR-3184-5p, miR-206-3p, miR-142a-5p, miR-145a-5p, miR-1285, miR-1434-3p, miR-29b, miR-26b-3p, miR-130a-3p, miR-665, miR-185-5p, miR-365b-5p, miR-1343-5p, miR-125a-5p, miR-660, miR-628-5p, miR-363-5p, miR-130b-5p, miR-539-3p, miR-2285r, miR-3591-3p, miR-378b, miR-18b, miR-3120-3p, miR-216b-3p, novel_69, miR-29a-3p, miR-670-3p, miR-382-5p, miR-6402, miR-142b, miR-4324, miR-147-5p, miR-502b, miR-29a, miR-206, miR-2285x, miR-29c-3p, miR-495-3p, miR-199b-5p, miR-301b-3p, miR-24-3p, miR-1343-5p, miR-29d-3p, miR-3578, miR-18b-5p, miR-545-5p, miR-217, miR-205-5p, miR-2898, miR-1, miR-3064-5p, miR-30a-3p, miR-199a-5p, miR-18a, miR-3154, miR-1814c, miR-329b, miR-767, miR-125a, miR-487a-3p, miR-199a-5p, miR-409-3p, miR-125b-5p, miR-29b-3p, miR-191-5p, miR-767-5p, miR-365a-5p |
| SLC9A1 | ENSOARGO(solute c) | miR-135a-2-3p, miR-4510, miR-486-3p, miR-148b-5p, miR-92a-1-5p, miR-486b-3p, miR-760-3p, miR-3600, novel_68, novel_116, miR-149-5p, miR-455-3p, miR-6130, miR-185-5p, miR-30b-3p, miR-2387, miR-30b-3p, miR-1291, miR-9788-3p, miR-203-3p, novel_25, miR-539-5p, miR-301a-3p, miR-130a-3p, miR-504-5p, miR-504, miR-1193, miR-124-3p, miR-1434-3p, miR-143-3p, novel_39, miR-29b-1-5p, miR-654-3p, miR-17-3p, miR-382, miR-124a, miR-28-5p, novel_96, miR-708-5p, miR-454-3p, miR-22-5p, miR-130b-3p, miR-17-3p, miR-17-3p, miR-491-5p, miR-29b-1-5p, miR-4324                                                                                                                                                                                                                                                                                                                                                                                                                                                                                                                                                                                                                                                                                                                                                                                                                                                                                                                                                                                                                                                                                                                              |
| ZP4    | ENSOARGO(zona pel) | miR-7b-5p, miR-450c-3p, miR-380-3p, miR-2426, miR-3120-5p, miR-2284x, miR-187-3p, miR-130a-3p, miR-421, miR-7-5p, miR-199a-3p, miR-99a-5p, miR-136-3p, miR-130b-3p, let-7j, miR-2310, miR-2387, miR-99b-5p, miR-96-5p, miR-136-5p, miR-9-3p, miR-20a-3p, miR-211-5p, miR-26b-5p, miR-25, miR-3596, miR-670-3p, miR-142b, miR-2440, miR-92a-3p, miR-421-5p, miR-3059-5p, miR-363-3p, miR-136-3p, miR-452-5p, miR-9-5p, miR-211, miR-323c, miR-3959-3p, miR-9-3p, miR-301b-3p, miR-99a-5p, miR-9-5p, miR-222-5p, miR-1271-5p, miR-450a-1-3p, miR-199a-3p, miR-99a, miR-26a-5p, miR-92a-3p, miR-29b-2-5p, miR-421-5p, miR-92b-3p, miR-450a-1-3p, miR-500a-3p, miR-100-5p, miR-3074-1-3p, miR-1248, miR-1814c, miR-216b-3p, miR-301a-3p, miR-25-3p, miR-133c, novel_63, miR-29b-2-5p, miR-3604, miR-3969, miR-450b-3p, miR-500, miR-454-3p, miR-204-5p, miR-1271                                                                                                                                                                                                                                                                                                                                                                                                                                                                                                                                                                                                                                                                                                                                                                                                                                |
| NOX4   | ENSOARGO(NADPH ox) |                                                                                                                                                                                                                                                                                                                                                                                                                                                                                                                                                                                                                                                                                                                                                                                                                                                                                                                                                                                                                                                                                                                                                                                                                                                                                                                                                                                                                                                                                                                                                                                                                                                                                             |

miR-128-3p, miR-615-3p, miR-378i, miR-2366, miR-2300b-3p, miR-1343-5p, miR-5703, miR-378a-3p, miR-24-2-5p, miR-148b-3p, miR-378h, miR-532-3p, miR-3960, miR-380-5p, miR-450a-2-3p, miR-221-5p, miR-30b-3p, miR-152-3p, miR-1260a, miR-422a, miR-105-3p, miR-3064-5p, miR-29b-2-5p, miR-4286, miR-1895, miR-485-5p, miR-500a-3p, miR-3154, miR-769, miR-154b-5p, miR-221-5p, miR-140-5p, miR-504-5p, miR-378a-3p, miR-2355-5p, miR-500, miR-665, miR-29b-2-5p, miR-769-5p, miR-1260b, miR-122-5p, miR-378c, miR-365a-5p, miR-378c, novel\_42, miR-3074-5p, miR-30b-3p, miR-378c, miR-1260b, miR-3120-5p, miR-484, miR-378b, miR-541, miR-3071-5p, miR-30b-3p, miR-185-5p, miR-31-5p, novel\_78, novel\_4, miR-1343-3p, miR-2300a-5p, miR-3085-3p, miR-1343-5p, miR-1306-5p, miR-3141, miR-365b-5p, novel\_51, miR-378d, miR-4532, miR-1388-3p, miR-1291, miR-147-3p, miR-504, miR-378f, miR-361-3p, miR-3141, miR-148a-3p, miR-2387, miR-150-5p, miR-1306, miR-216a-3p, miR-2404, miR-378e, novel\_69, miR-3064-5p, miR-3074-5p, miR-499b-5p, miR-615, miR-769-5p, miR-877-3p, miR-361-3p, miR-371b-3p, miR-24-3p, novel\_27, novel\_60, miR-3956-3p, miR-541-3p, miR-758-5p, miR-664a, miR-138-5p, miR-4726-5p, miR-147-5p, miR-6123, miR-2285t, miR-874-5p, miR-2433, miR-6740-5p, novel\_111, miR-361-3p, miR-3074-5p, miR-541-3p, miR-2330-3p, miR-1291, miR-485-5p, miR-6395, miR-146b-5p, miR-1895, miR-3154, miR-137-3p, miR-1306, miR-6535, miR-324-5p, miR-22-3p, miR-3074-5p, miR-7977, miR-499b-5p, miR-320b, miR-146b, miR-210-5p, miR-146a, miR-1306-5p, miR-654-3p, miR-146a-5p, miR-2285w, miR-363-5p, miR-941, miR-138, miR-30b-3p, miR-541, miR-1285, miR-2284r, miR-1197-5p, miR-30b-3p, miR-5703, miR-22-3p, miR-2427, miR-1298-3p, miR-328-3p, miR-2284h-5p, novel\_83, novel\_4, miR-2300a-5p, miR-31-5p, miR-200a-3p, miR-450a-2-3p, miR-28-3p, miR-200c-3p, miR-127-5p, miR-216a-5p, miR-2285af, miR-200c, miR-29a-5p, miR-664b-3p, miR-29b-1-5p, miR-3529-3p, miR-487a, miR-200b-3p, miR-1290, miR-3578, miR-23b-3p, miR-487a-3p, miR-200b, miR-23c, miR-429-3p, miR-592, miR-144, miR-6740-5p, novel\_63, miR-365a-5p, miR-144-5p, miR-103b, miR-133a-3p, miR-28a-3p, miR-133b-3p, miR-154b-3p, miR-27b-5p, miR-23b, miR-488-3p, miR-499b-3p, miR-582-5p, miR-141-3p, miR-574-5p, miR-487a-3p, miR-548o-3p, miR-1185-5p, miR-365b-5p, miR-29b-1-5p, miR-539-3p, miR-654-3p, miR-23a-3p, miR-668-3p, miR-744-3p, miR-219a-1-3p, miR-708-3p, miR-216a-3p, miR-1185-3p, miR-8095, novel\_111, miR-452-5p, miR-3059-5p, novel\_120, miR-885-5p, miR-877-3p, miR-3065-5p, miR-378j, miR-144-3p, miR-144-5p, miR-1185-2-3p, miR-499a-3p, miR-25, miR-670-3p, miR-2483-3p, miR-541-5p, miR-7-1-3p

RPS5 ENSOARGO(ribosoma 5p, miR-744-5p, novel\_19, miR-324-3p, novel\_78

RCOR2 ENSOARGO(REST cor 7977, miR-499b-5p, miR-320b, miR-146b, miR-210-5p, miR-146a, miR-1306-5p, miR-654-3p, miR-146a-5p, miR-2285w, miR-363-5p, miR-941, miR-138, miR-30b-3p, miR-541, miR-1285, miR-2284r, miR-1197-5p, miR-30b-3p, miR-5703, miR-22-3p, miR-2427, miR-1298-3p, miR-328-3p, miR-2284h-5p, novel\_83, novel\_4, miR-2300a-5p, miR-31-5p, miR-200a-3p, miR-450a-2-3p, miR-28-3p, miR-200c-3p, miR-127-5p, miR-216a-5p, miR-2285af, miR-200c, miR-29a-5p, miR-664b-3p, miR-29b-1-5p, miR-3529-3p, miR-487a, miR-200b-3p, miR-1290, miR-3578, miR-23b-3p, miR-487a-3p, miR-200b, miR-23c, miR-429-3p, miR-592, miR-144, miR-6740-5p, novel\_63, miR-365a-5p, miR-144-5p, miR-103b, miR-133a-3p, miR-28a-3p, miR-133b-3p, miR-154b-3p, miR-27b-5p, miR-23b, miR-488-3p, miR-499b-3p, miR-582-5p, miR-141-3p, miR-574-5p, miR-487a-3p, miR-548o-3p, miR-1185-5p, miR-365b-5p, miR-29b-1-5p, miR-539-3p, miR-654-3p, miR-23a-3p, miR-668-3p, miR-744-3p, miR-219a-1-3p, miR-708-3p, miR-216a-3p, miR-1185-3p, miR-8095, novel\_111, miR-452-5p, miR-3059-5p, novel\_120, miR-885-5p, miR-877-3p, miR-3065-5p, miR-378j, miR-144-3p, miR-144-5p, miR-1185-2-3p, miR-499a-3p, miR-25, miR-670-3p, miR-2483-3p, miR-541-5p, miR-7-1-3p

AADACL2 ENSOARGO(arylacet 499b-3p, miR-582-5p, miR-141-3p, miR-574-5p, miR-487a-3p, miR-548o-3p, miR-1185-5p, miR-365b-5p, miR-29b-1-5p, miR-539-3p, miR-654-3p, miR-23a-3p, miR-668-3p, miR-744-3p, miR-219a-1-3p, miR-708-3p, miR-216a-3p, miR-1185-3p, miR-8095, novel\_111, miR-452-5p, miR-3059-5p, novel\_120, miR-885-5p, miR-877-3p, miR-3065-5p, miR-378j, miR-144-3p, miR-144-5p, miR-1185-2-3p, miR-499a-3p, miR-25, miR-670-3p, miR-2483-3p, miR-541-5p, miR-7-1-3p

DUSP22 ENSOARGO(dual spe 7977, miR-499b-5p, miR-320b, miR-146b, miR-210-5p, miR-146a, miR-1306-5p, miR-654-3p, miR-146a-5p, miR-2285w, miR-363-5p, miR-941, miR-138, miR-30b-3p, miR-541, miR-1285, miR-2284r, miR-1197-5p, miR-30b-3p, miR-5703, miR-22-3p, miR-2427, miR-1298-3p, miR-328-3p, miR-2284h-5p, novel\_83, novel\_4, miR-2300a-5p, miR-31-5p, miR-200a-3p, miR-450a-2-3p, miR-28-3p, miR-200c-3p, miR-127-5p, miR-216a-5p, miR-2285af, miR-200c, miR-29a-5p, miR-664b-3p, miR-29b-1-5p, miR-3529-3p, miR-487a, miR-200b-3p, miR-1290, miR-3578, miR-23b-3p, miR-487a-3p, miR-200b, miR-23c, miR-429-3p, miR-592, miR-144, miR-6740-5p, novel\_63, miR-365a-5p, miR-144-5p, miR-103b, miR-133a-3p, miR-28a-3p, miR-133b-3p, miR-154b-3p, miR-27b-5p, miR-23b, miR-488-3p, miR-499b-3p, miR-582-5p, miR-141-3p, miR-574-5p, miR-487a-3p, miR-548o-3p, miR-1185-5p, miR-365b-5p, miR-29b-1-5p, miR-539-3p, miR-654-3p, miR-23a-3p, miR-668-3p, miR-744-3p, miR-219a-1-3p, miR-708-3p, miR-216a-3p, miR-1185-3p, miR-8095, novel\_111, miR-452-5p, miR-3059-5p, novel\_120, miR-885-5p, miR-877-3p, miR-3065-5p, miR-378j, miR-144-3p, miR-144-5p, miR-1185-2-3p, miR-499a-3p, miR-25, miR-670-3p, miR-2483-3p, miR-541-5p, miR-7-1-3p

miR-34b-5p, miR-543-5p, miR-219b-5p, miR-30f, miR-24-2-5p, miR-148b-5p, miR-195a-3p, miR-668-3p, miR-30a-3p, miR-181a-2-3p, miR-34a-5p, miR-1388-5p, miR-219a-1-3p, miR-1298-5p, miR-214-5p, miR-147a, miR-665, miR-3600, miR-181b-2-3p, miR-30a-3p, miR-34c, miR-320e, miR-382-3p, miR-30e-3p, miR-449a, miR-877-3p, novel\_101, miR-3059-5p, miR-625-5p, miR-582-5p, miR-136-5p, miR-677, novel\_25, miR-203-3p, miR-877-5p, miR-181b-3p, miR-34c-5p, miR-582-5p, miR-34b, miR-216b-5p, miR-3120-3p, miR-24-1-5p

miR-26b-3p, miR-340-3p, novel\_78, miR-2300a-5p, miR-1343-3p, miR-432-5p, miR-503-5p, miR-30b-3p, miR-484, miR-432, miR-2284r, miR-2889, miR-138, miR-30b-3p, miR-574-3p, novel\_19, miR-505, novel\_51, miR-503-5p, miR-7-5p, miR-326, miR-125a-5p, miR-199b-5p, miR-3085-3p, miR-3064-5p, miR-3074-5p, novel\_69, miR-18a-3p, miR-2285ab, miR-199b-5p, miR-9851-3p, miR-1291, miR-2285f, miR-495-3p, novel\_27, miR-326-3p, miR-423-5p, miR-199b-5p, miR-361-3p, novel\_82, miR-128-1-5p, miR-18a-3p, miR-330-5p, miR-378d, miR-582-3p, miR-3064-5p, miR-503-5p, miR-199a-5p, miR-486-3p, novel\_39, miR-185-3p, miR-125b, novel\_17, miR-543-5p, novel\_127, miR-370-3p, miR-125a, miR-545-3p, miR-874-3p, miR-199a-5p, miR-1827, miR-2312, miR-193a-5p, miR-3074-5p, miR-3184-5p, miR-346, miR-331-3p, miR-125b-5p, miR-2433, miR-486b-3p, miR-138-5p

miR-335-3p, miR-877-3p, miR-136-5p, miR-320c, miR-3596, miR-541-5p, miR-664b, miR-20a-3p, miR-329-5p, miR-421-5p, miR-301a-5p, miR-33a-3p, miR-576-3p, miR-8095, miR-219a-2-3p, miR-877-3p, miR-219a-5p, miR-181d-5p, novel\_60, miR-885-5p, miR-3956-3p, miR-2284ab, miR-197-3p, miR-758-3p, miR-653, miR-301b-5p, miR-181a-5p, novel\_116, miR-2284d, miR-133b-5p, miR-2411-3p, miR-320b, miR-377-3p, miR-758-3p, let-7a-2-3p, miR-382-3p, miR-582-5p, let-7g-3p, miR-329b, miR-320a, miR-582-5p, miR-377-3p, miR-140-5p, miR-134-5p, miR-664a, miR-219b-3p, miR-29b-2-5p, miR-2284k, miR-181c-5p, miR-6525, let-7a-2-3p, miR-4429, miR-188-3p, miR-345-3p, miR-134, miR-134-5p, miR-758-5p, miR-543-5p, miR-320d, miR-466i-5p, miR-181b-5p, miR-219b-5p, miR-219-3p, miR-664-3p, miR-29a-5p, miR-29b-2-5p, miR-329a-5p

DYM ENSOARGO(dymeclin

SCAP ENSOARGO(SREBF ch.

ZNF248 ENSOARGO(zinc fin.

miR-493-5p, miR-9-3p, miR-6516-3p, miR-504, miR-668-5p, miR-320c, miR-1185-2-3p, novel\_69, miR-3082-5p, miR-320b, miR-329-5p, miR-2284q, miR-206, miR-335, miR-33a-3p, miR-20a-5p, miR-2428, miR-219a-2-3p, novel\_111, novel\_101, miR-17-3p, miR-335-5p, miR-212-3p, miR-16-2-3p, miR-101c, miR-2284aa, miR-380-3p, miR-219a-1-3p, miR-450b-5p, miR-1a-3p, miR-3071-5p, miR-708-3p, miR-455-3p, miR-9788-3p, miR-20b, miR-1185-3p, miR-3955-5p, miR-330-3p, miR-125a-5p, miR-3955-3p, miR-365b-5p, miR-330-3p, miR-197-5p, miR-106a-5p, miR-106b-5p, miR-17-5p, miR-2411-3p, miR-224-5p, miR-320b, miR-4532, miR-3187-3p, miR-432-3p, miR-432-3p, miR-23a-3p, miR-382, let-7f-2-3p, let-7f-2-3p, miR-6240, miR-493-5p, miR-106a-5p, miR-20b-5p, let-7g-3p, miR-329b, miR-93-5p, miR-17-5p, miR-23b, miR-3154, miR-320a, miR-488-3p, miR-216b-5p, miR-125a, miR-552-3p, miR-532-5p, miR-504-5p, miR-129-5p, miR-486b-3p, novel\_74, miR-17-3p, miR-664a, miR-125b-5p, miR-219b-3p, miR-665, miR-410-5p, miR-365a-5p, miR-6134, miR-93, miR-224-5p, miR-206-3p, miR-193a-5p, miR-200b-3p, miR-493-3p, miR-4429, miR-5703, miR-345-3p, miR-3591-5p, miR-2366, miR-2284z, novel\_121, miR-23b-3p, miR-200b, miR-23c, miR-3600, miR-1b-3p, miR-1224-5p, miR-548e-3p, miR-429-3p, miR-106a, miR-106a, miR-320d, miR-17-3p, miR-200c-3p, miR-125b, miR-345-3p, miR-2285af, miR-200c, miR-219-3p, miR-618, miR-486-3p, miR-380-3p, miR-664b-3p, miR-148b-5p, miR-125b-2-3p, miR-1, miR-20a, miR-216c-5p, miR-329a-5p  
 miR-486b-3p, miR-24-3p, miR-6525, miR-423-5p, miR-3184-5p, miR-145-3p, miR-145a-3p, miR-214, miR-147-3p, miR-7144-5p, miR-18a-3p, miR-216a-3p, miR-574-5p, miR-7977, miR-2355-5p, miR-370-3p, miR-466i-5p, miR-214-3p, novel\_127, miR-143-3p, miR-486-3p, miR-128-3p, miR-1285, miR-1246, miR-193b-5p, miR-145a-5p, miR-5703, miR-3431, miR-1298-3p, miR-455-3p, miR-1343-3p, miR-18a-3p, miR-145b

TYR ENSOARGO( tyrosina  
 TAT ENSOARGO( tyrosine

miR-125a-3p, miR-30f, novel\_127, miR-152-3p, miR-29a-5p, novel\_39, miR-330-5p, miR-299a-3p, miR-412, miR-9-5p, miR-322-5p, miR-2284z, novel\_121, miR-2284k, miR-125b-5p, miR-6740-5p, miR-592, miR-16-5p, miR-1197-3p, miR-767, miR-345-5p, miR-574-5p, miR-874-3p, miR-125a, miR-7-5p, miR-377-3p, miR-365b-5p, miR-105-5p, miR-2411-3p, miR-432-3p, miR-2284l, miR-432-3p, miR-1843b-5p, miR-542-3p, miR-7b-5p, miR-22-3p, novel\_23, miR-16b, miR-497-5p, miR-2284x, miR-31-5p, miR-103a-3p, miR-412-5p, miR-149-5p, miR-194-3p, miR-28c, miR-576-3p, miR-206, miR-29a, miR-625-3p, miR-335-5p, miR-29c-3p, miR-376b-5p, miR-148a-3p, miR-1306, miR-3591-3p, miR-2319a, miR-378f, miR-3074-5p, miR-3120-3p, miR-299b-3p, miR-320c, miR-144-3p, miR-500a-5p, miR-345-3p, miR-422a, miR-345-3p, miR-376a-5p, miR-486-3p, miR-143-3p, miR-378i, miR-2366, miR-378a-3p, miR-18a-3p, miR-7859, miR-95-3p, miR-328-3p, miR-3604, miR-664a-5p, miR-500, miR-3074-5p, miR-181c-5p, miR-500a-3p, miR-129b-3p, miR-433-3p, miR-345-5p, miR-625-5p, miR-543-3p, miR-186-5p, miR-548o-3p, miR-377-3p, miR-15b-5p, miR-16b, miR-182-5p, miR-153-3p, miR-574-3p, miR-101b-3p, miR-378d, miR-2310, miR-2284r, miR-301b-5p, miR-501-3p, miR-1a-3p, miR-758-3p, miR-101c, miR-1343-3p, novel\_78, miR-153, miR-148b-5p, miR-2459, miR-101-3p, miR-301a-5p, miR-490-5p, miR-2447, miR-9-5p, miR-877-3p, miR-9-3p, miR-24-1-5p, miR-2319b, miR-500-3p, miR-6119-5p, miR-2898, miR-17-3p, miR-181b-5p, miR-107, miR-29b-2-5p, miR-1, miR-24-2-5p, miR-28b, miR-2478, miR-3065-3p, miR-345-3p, miR-29d-3p, miR-501-3p, miR-105-2, miR-378h, miR-29b-3p, miR-410-5p, miR-5100, miR-370-5p, miR-135a-1-3p, miR-144, miR-138-5p, miR-767-5p, miR-486b-3p, miR-500b-5p, miR-378c, miR-365a-5p, miR-488-3p, miR-3154, miR-362-5p, miR-320a, miR-10b-3p, novel\_48, miR-376c-5p, miR-1814c, miR-485-3p, miR-3529-3p, miR-216c-5p, miR-1b-5p, miR-491-3p, miR-8485, miR-2478, miR-144, miR-362-3p, miR-2285p, miR-1247-3p, miR-221-5p, miR-27a-3p, miR-216b-3p, miR-655-5p, miR-21-3p, miR-221-5p, miR-27a-3p, miR-144-3p, miR-3591-3p, miR-542-3p, miR-2300b-3p, miR-362-3p, miR-1434-3p, miR-329-3p, miR-27b-3p, miR-186-5p, miR-885-3p, miR-329a, miR-885-3p, miR-362-3p



miR-877-3p, miR-362-5p, miR-499a-5p, miR-450a-5p, miR-2285t, miR-490-5p, miR-101-3p, miR-107-5p, miR-378e, miR-203-3p, miR-4792, miR-211-5p, miR-136-5p, miR-1983, miR-140-5p, miR-378d, miR-1388-3p, miR-106a-5p, miR-491-5p, miR-381-5p, miR-103a-2-5p, miR-320b, miR-29b-1-5p, miR-2957, miR-106b-5p, miR-147a, miR-216a-3p, miR-500-5p, miR-151a-3p, miR-145b, miR-181b-2-3p, miR-378c, miR-101a-5p, miR-2426, miR-101c, miR-378b, miR-484, miR-412-3p, miR-346, miR-378c, miR-433-5p, miR-2330-3p, miR-450b-3p, miR-17-3p, miR-151-3p, miR-320e, miR-29b-2-5p, miR-27a-5p, miR-377-3p, miR-140-5p, miR-378a-3p, miR-2331-3p, miR-552-3p, miR-133b-3p, miR-450a-1-3p, miR-29b-1-5p, miR-181b-1-3p, miR-2432, miR-486-3p, miR-329a-5p, miR-20a, miR-106a, miR-202-5p, miR-320d, miR-3653-3p, miR-34b-5p, miR-299-3p, miR-21-3p, miR-422a, miR-328-3p, miR-106a, miR-30d-3p, miR-4429, miR-142-3p, miR-34a-5p, miR-378i, novel\_133, miR-215-5p, miR-378a-3p, miR-1197-5p, miR-211, miR-449a, miR-2284w, novel\_101, miR-17-3p, miR-203b-5p, miR-20a-5p, miR-34c, miR-146b-3p, miR-34b, miR-299b-3p, miR-677, miR-320c, miR-181b-3p, novel\_68, miR-329-5p, miR-216b-3p, miR-320b, miR-412-3p, miR-378f, miR-6395, miR-2387, miR-216a-3p, miR-101-5p, miR-628-5p, miR-124-5p, miR-378a-5p, miR-377-3p, miR-106a-5p, miR-17-5p, novel\_116, miR-20b, miR-381-5p, miR-188-5p, miR-2284x, miR-450c-3p, miR-145a-5p, miR-93, miR-500b-5p, miR-1197-3p, miR-378c, miR-133a-3p, miR-486b-3p, miR-374b-3p, miR-204-5p, miR-34c-5p, miR-154b-5p, miR-215-5p, miR-329b, miR-20b-5p, miR-503-3p, miR-93-5p, miR-17-5p, miR-362-5p, miR-320a, miR-450c-5p, miR-29b-2-5p, miR-2385-3p, miR-17-3p, novel\_96, miR-205-5p, miR-505-5p, miR-378h, miR-450a-1-3p, miR-299a-3p, miR-6517, miR-1224-5p, miR-412, miR-128-3p, miR-23b-5p  
miR-18a-3p, miR-1306, miR-21a-3p, miR-1827, miR-6395, miR-1291, miR-3065-3p, miR-30c-1-3p, miR-6130, miR-3596, miR-146b-3p, miR-324-3p, miR-6529b, miR-374b-3p, miR-4492, novel\_1, miR-138-5p, miR-4726-5p, miR-452-5p, miR-4510, miR-3184-5p, miR-423-5p, miR-374a-3p, miR-24-3p, novel\_23, miR-1343-5p, miR-542-3p, miR-148a-5p, miR-138, miR-2300a-5p, miR-18a-3p, miR-31-5p, miR-328-3p, novel\_83, miR-148b-5p, miR-505-5p, miR-185-3p, miR-30c-2-3p, miR-618, miR-1306-5p, novel\_127, novel\_96, miR-1343-5p, miR-491-5p, miR-192-3p, miR-490-3p, miR-3187-3p, miR-8485, miR-3065-3p, miR-30c-1-

ZNF23      ENSOARGO(zinc fin

SMARCD3    ENSOARGO(SWI/SNF :3p

miR-2300a-5p, miR-1343-3p, miR-1298-3p, miR-2285e, miR-216a-3p, miR-9788-3p, miR-301b-5p, miR-378b, miR-296-5p, miR-2284r, miR-30b-3p, miR-2426, miR-378c, miR-1388-5p, miR-424-5p, miR-378d, miR-193a, miR-326, miR-1306-5p, miR-320b, miR-16b, miR-3085-3p, miR-214-3p, miR-3064-5p, miR-7977, miR-378e, miR-361-3p, miR-140-5p, miR-1983, miR-3956-3p, novel\_60, miR-361-3p, miR-101-3p, miR-2440, miR-301a-5p, miR-148b-3p, miR-15a-5p, miR-2366, miR-378i, novel\_133, miR-1197-5p, miR-1193, miR-188-3p, miR-378a-3p, miR-4429, miR-33b-3p, miR-34a-5p, miR-125b-2-3p, miR-2432, miR-486-3p, novel\_17, miR-422a, miR-324-3p, miR-99a-3p, miR-320d, miR-299-3p, miR-34b-5p, miR-30b-3p, miR-140-5p, miR-378a-3p, miR-370-5p, miR-193b-3p, miR-6130, miR-6516, miR-15b-5p, miR-877-5p, novel\_32, miR-2285c, miR-129-2-3p, miR-3074-5p, miR-4510, miR-378c, miR-214, miR-665-5p, miR-3074-2-3p, miR-425-5p, miR-346, miR-224-5p, miR-6134, miR-29b-2-5p, miR-665, miR-17-3p, miR-424-5p, miR-2285g, miR-149-5p, miR-30b-3p, miR-16b, miR-497-5p, miR-432-3p, miR-224-5p, miR-193a-3p, miR-452-5p, miR-3074-5p, miR-378b, miR-216b-3p, miR-299b-3p, miR-670-3p, miR-34b, miR-6535, miR-320c, miR-148a-3p, miR-2387, miR-150-5p, miR-1306, miR-412-3p, miR-378f, miR-195a-5p, miR-1193, miR-17-3p, miR-193b-3p, miR-326-3p, miR-449a, miR-15a, novel\_87, miR-16a, miR-34c, miR-299a-3p, miR-6516-5p, miR-378h, miR-322-5p, miR-129-1-3p, miR-1290, miR-330-5p, miR-181a-2-3p, miR-29b-2-5p, miR-3064-5p, miR-2285b, miR-17-3p, miR-152-3p, miR-99a-3p, miR-2355-5p, miR-2285aa, miR-34c-5p, miR-324-5p, miR-488-3p, miR-3154, miR-320a, miR-1248, miR-7144-5p, miR-16-5p, miR-323-3p, miR-378c, miR-370-5p, miR-99b-3p, miR-2433, miR-486b-3p

VIP

ENSOARGO( vasoacti

miR-9-3p, miR-499a-3p, miR-27a-3p, miR-2284g, miR-4792, miR-126b-5p, miR-211-5p, miR-30b-5p, miR-9-3p, miR-2447, miR-32-3p, miR-2284j, miR-181d-5p, miR-544a, miR-450b-5p, miR-101a-5p, miR-362-3p, miR-329-3p, miR-1a-3p, miR-153, miR-105-1, novel\_4, miR-27a-3p, miR-181b-2-3p, miR-3955-3p, miR-153-3p, novel\_103, miR-320b, miR-182-5p, miR-362-3p, miR-1b-5p, miR-8485, miR-382-3p, miR-494-3p, miR-652-5p, miR-339b, miR-30f, miR-186-5p, novel\_99, miR-543-3p, miR-411, miR-30d-5p, miR-192-5p, miR-499b-3p, miR-544-3p, miR-582-5p, miR-877-5p, miR-204-3p, miR-32-3p, miR-496-3p, miR-182-5p, miR-2285j, miR-3604, miR-206-3p, miR-181c-5p, miR-145a-3p, miR-4429, miR-2284u, miR-361-5p, miR-378d, miR-1246, miR-193b-5p, miR-215-5p, miR-362-3p, miR-30c-5p, miR-200b, miR-320d, miR-2284m, miR-30d, miR-30b, miR-216a-5p, miR-181b-1-3p, miR-130a-5p, miR-216c-5p, miR-181b-3p, miR-677, miR-144-3p, miR-320c, miR-7-1-3p, miR-206, novel\_1, miR-147-5p, miR-576-3p, miR-382-5p, miR-3959-3p, miR-211, miR-2428, miR-2284w, novel\_27, miR-1a-1-5p, miR-27b-3p, miR-2284x, miR-181a-5p, miR-3431, miR-2284d, miR-544b, miR-187-3p, miR-31-5p, miR-339-5p, miR-105-5p, miR-329a, miR-3074-1-3p, miR-30e-5p, miR-3154, miR-320a, miR-2284n, miR-215-5p, miR-370-3p, miR-134-5p, miR-204-5p, miR-2284k, miR-1-5p, miR-144, miR-2284v, miR-496, miR-105-2, miR-30c, miR-200b-3p, miR-134, miR-1290, miR-30a-5p, miR-134-5p, miR-429-3p, novel\_79, miR-200c-3p, miR-1a-2-5p, miR-181b-5p, miR-200c, miR-2285af, miR-339a, miR-30f, miR-450b-5p, miR-2284a, miR-2284y, miR-1

miR-320a, miR-3154, miR-301, miR-503-3p, miR-7144-5p, miR-876-3p, miR-2318, miR-345-5p, miR-329a, miR-141-3p, miR-125a, miR-133c, miR-2284n, miR-376c-3p, miR-34c-5p, miR-769, miR-6740-5p, miR-125b-5p, miR-135a-5p, miR-3969, miR-2284k, miR-410-5p, miR-370-5p, miR-486b-3p, miR-16-5p, miR-1260b, miR-330-5p, miR-1290, miR-105-2, miR-10a-5p, miR-411-3p, miR-1224-5p, miR-2285ad, miR-582-3p, miR-486-5p, miR-9-5p, miR-322-5p, miR-2285af, miR-1260a, miR-2397-5p, miR-200a-3p, miR-17-3p, miR-29b-2-5p, miR-29a-5p, miR-490-3p, miR-2285b, miR-2478, miR-148b-5p, miR-150-5p, miR-2285ab, miR-146b-5p, miR-135b-5p, miR-195a-5p, miR-450b-3p, miR-10a-5p, miR-216b-3p, miR-378b, miR-320c, miR-669, miR-34b, miR-34c, miR-16a, miR-1247-3p, miR-15a, miR-133a-5p, miR-576-3p, miR-656-5p, novel\_1, miR-206, miR-379-3p, miR-1839-3p, miR-17-3p, miR-1193, miR-326-3p, miR-449a, miR-24-3p, miR-323c, novel\_23, miR-3071-5p, miR-19b-2-5p, miR-708-3p, miR-1285, miR-2113, miR-497-5p, miR-2284ab, miR-16b, miR-1260b, miR-194-3p, miR-2285g, miR-185-5p, miR-105-5p, miR-296-3p, miR-146a, miR-452-5p, miR-125a-5p, let-7f-2-3p, let-7f-2-3p, let-7j, miR-296-3p, miR-345-5p, miR-129b-3p, miR-2285c, miR-582-5p, miR-186-5p, miR-2312, miR-345-5p, miR-370-5p, miR-140-5p, miR-204-3p, miR-15b-5p, miR-151b, miR-376e-3p, miR-582-5p, miR-10a, miR-139-5p, miR-6130, miR-19b-1-5p, miR-29b-2-5p, miR-2285j, miR-424-5p, miR-17-3p, miR-425-5p, miR-214, miR-3074-2-3p, miR-145a-3p, miR-4510, miR-338-3p, miR-6525, miR-769-5p, miR-10b-5p, miR-206-3p, miR-1197-5p, miR-5703, miR-188-3p, miR-1193, miR-1246, miR-362-3p, miR-148a-5p, miR-378d, miR-34a-5p, miR-4429, miR-548e-3p, miR-151-5p, miR-2284h-5p, miR-532-3p, miR-7859, miR-15a-5p, miR-500a-5p, miR-125b, miR-34b-5p, miR-21-3p, miR-2284m, miR-320d, miR-345-3p, miR-216c-5p, miR-2285w, miR-486-3p, miR-146a-5p, miR-2424, miR-130a, miR-664a, miR-4492, miR-130b-5p, let-7f, miR-135a-1-3p, miR-370-5p, miR-19b-1-5p, miR-125b-5p, let-7b-5p, miR-539-5p, let-7b, miR-3958-5p, miR-485-5p, miR-129b-3p, miR-2284s, let-7i-5p, miR-874-3p, miR-370-5p, miR-125a, let-7f-5p, miR-760-3p, miR-98-5p, let-7k, miR-196a-3p, miR-210-5p, let-7c-5p, miR-125b, miR-185-3p, miR-148b-5p, let-7g, miR-329a-5p, miR-2403, miR-941, let-7d, miR-184-3p, miR-148a-5p, miR-378d, miR-193b-5p, miR-1961, miR-7134-5p, miR-124-3p, miR-383-5p, novel\_83, miR-128-1-5p, miR-2285n, miR-1973, let-7i, miR-877-3p, miR-1193, miR-410-5p, miR-379-5p, let-7e-5p, miR-3970, miR-129b-5p, miR-378g, novel\_69, miR-6535, let-7d-5p, miR-329-5p, miR-7977, miR-2285l, miR-125a-5p, let-7e, miR-197-5p, novel\_19, miR-330-3p, miR-2957, miR-432-3p, let-7a-5p, miR-130b-5p, miR-124a, miR-6240, miR-101a-5p, miR-2426, miR-1839-5p, miR-2284r, miR-484, miR-19b-2-5p, miR-143-5p, miR-425-3p, miR-134-3p, miR-3431, let-7g-5p, miR-455-3p, miR-148b-5p, novel\_78, miR-330-3p, miR-21-3p, miR-486b-3p, miR-490-5p, miR-184-3p, miR-2904, miR-2300b-3p, miR-455-3p, miR-486-3p, miR-323-5p, miR-323a-5p, miR-2355-5p, miR-105-3p

NUCB2 ENSOARGO(nucleobindin-2) miR-3071-5p, miR-19b-2-5p, miR-708-3p, miR-1285, miR-2113, miR-497-5p, miR-2284ab, miR-16b, miR-1260b, miR-194-3p, miR-2285g, miR-185-5p, miR-105-5p, miR-296-3p, miR-146a, miR-452-5p, miR-125a-5p, let-7f-2-3p, let-7f-2-3p, let-7j, miR-296-3p, miR-345-5p, miR-129b-3p, miR-2285c, miR-582-5p, miR-186-5p, miR-2312, miR-345-5p, miR-370-5p, miR-140-5p, miR-204-3p, miR-15b-5p, miR-151b, miR-376e-3p, miR-582-5p, miR-10a, miR-139-5p, miR-6130, miR-19b-1-5p, miR-29b-2-5p, miR-2285j, miR-424-5p, miR-17-3p, miR-425-5p, miR-214, miR-3074-2-3p, miR-145a-3p, miR-4510, miR-338-3p, miR-6525, miR-769-5p, miR-10b-5p, miR-206-3p, miR-1197-5p, miR-5703, miR-188-3p, miR-1193, miR-1246, miR-362-3p, miR-148a-5p, miR-378d, miR-34a-5p, miR-4429, miR-548e-3p, miR-151-5p, miR-2284h-5p, miR-532-3p, miR-7859, miR-15a-5p, miR-500a-5p, miR-125b, miR-34b-5p, miR-21-3p, miR-2284m, miR-320d, miR-345-3p, miR-216c-5p, miR-2285w, miR-486-3p, miR-146a-5p, miR-2424, miR-130a, miR-664a, miR-4492, miR-130b-5p, let-7f, miR-135a-1-3p, miR-370-5p, miR-19b-1-5p, miR-125b-5p, let-7b-5p, miR-539-5p, let-7b, miR-3958-5p, miR-485-5p, miR-129b-3p, miR-2284s, let-7i-5p, miR-874-3p, miR-370-5p, miR-125a, let-7f-5p, miR-760-3p, miR-98-5p, let-7k, miR-196a-3p, miR-210-5p, let-7c-5p, miR-125b, miR-185-3p, miR-148b-5p, let-7g, miR-329a-5p, miR-2403, miR-941, let-7d, miR-184-3p, miR-148a-5p, miR-378d, miR-193b-5p, miR-1961, miR-7134-5p, miR-124-3p, miR-383-5p, novel\_83, miR-128-1-5p, miR-2285n, miR-1973, let-7i, miR-877-3p, miR-1193, miR-410-5p, miR-379-5p, let-7e-5p, miR-3970, miR-129b-5p, miR-378g, novel\_69, miR-6535, let-7d-5p, miR-329-5p, miR-7977, miR-2285l, miR-125a-5p, let-7e, miR-197-5p, novel\_19, miR-330-3p, miR-2957, miR-432-3p, let-7a-5p, miR-130b-5p, miR-124a, miR-6240, miR-101a-5p, miR-2426, miR-1839-5p, miR-2284r, miR-484, miR-19b-2-5p, miR-143-5p, miR-425-3p, miR-134-3p, miR-3431, let-7g-5p, miR-455-3p, miR-148b-5p, novel\_78, miR-330-3p, miR-21-3p, miR-486b-3p, miR-490-5p, miR-184-3p, miR-2904, miR-2300b-3p, miR-455-3p, miR-486-3p, miR-323-5p, miR-323a-5p, miR-2355-5p, miR-105-3p

GPATCH3 ENSOARGO(G patch) miR-3071-5p, miR-19b-2-5p, miR-708-3p, miR-1285, miR-2113, miR-497-5p, miR-2284ab, miR-16b, miR-1260b, miR-194-3p, miR-2285g, miR-185-5p, miR-105-5p, miR-296-3p, miR-146a, miR-452-5p, miR-125a-5p, let-7f-2-3p, let-7f-2-3p, let-7j, miR-296-3p, miR-345-5p, miR-129b-3p, miR-2285c, miR-582-5p, miR-186-5p, miR-2312, miR-345-5p, miR-370-5p, miR-140-5p, miR-204-3p, miR-15b-5p, miR-151b, miR-376e-3p, miR-582-5p, miR-10a, miR-139-5p, miR-6130, miR-19b-1-5p, miR-29b-2-5p, miR-2285j, miR-424-5p, miR-17-3p, miR-425-5p, miR-214, miR-3074-2-3p, miR-145a-3p, miR-4510, miR-338-3p, miR-6525, miR-769-5p, miR-10b-5p, miR-206-3p, miR-1197-5p, miR-5703, miR-188-3p, miR-1193, miR-1246, miR-362-3p, miR-148a-5p, miR-378d, miR-34a-5p, miR-4429, miR-548e-3p, miR-151-5p, miR-2284h-5p, miR-532-3p, miR-7859, miR-15a-5p, miR-500a-5p, miR-125b, miR-34b-5p, miR-21-3p, miR-2284m, miR-320d, miR-345-3p, miR-216c-5p, miR-2285w, miR-486-3p, miR-146a-5p, miR-2424, miR-130a, miR-664a, miR-4492, miR-130b-5p, let-7f, miR-135a-1-3p, miR-370-5p, miR-19b-1-5p, miR-125b-5p, let-7b-5p, miR-539-5p, let-7b, miR-3958-5p, miR-485-5p, miR-129b-3p, miR-2284s, let-7i-5p, miR-874-3p, miR-370-5p, miR-125a, let-7f-5p, miR-760-3p, miR-98-5p, let-7k, miR-196a-3p, miR-210-5p, let-7c-5p, miR-125b, miR-185-3p, miR-148b-5p, let-7g, miR-329a-5p, miR-2403, miR-941, let-7d, miR-184-3p, miR-148a-5p, miR-378d, miR-193b-5p, miR-1961, miR-7134-5p, miR-124-3p, miR-383-5p, novel\_83, miR-128-1-5p, miR-2285n, miR-1973, let-7i, miR-877-3p, miR-1193, miR-410-5p, miR-379-5p, let-7e-5p, miR-3970, miR-129b-5p, miR-378g, novel\_69, miR-6535, let-7d-5p, miR-329-5p, miR-7977, miR-2285l, miR-125a-5p, let-7e, miR-197-5p, novel\_19, miR-330-3p, miR-2957, miR-432-3p, let-7a-5p, miR-130b-5p, miR-124a, miR-6240, miR-101a-5p, miR-2426, miR-1839-5p, miR-2284r, miR-484, miR-19b-2-5p, miR-143-5p, miR-425-3p, miR-134-3p, miR-3431, let-7g-5p, miR-455-3p, miR-148b-5p, novel\_78, miR-330-3p, miR-21-3p, miR-486b-3p, miR-490-5p, miR-184-3p, miR-2904, miR-2300b-3p, miR-455-3p, miR-486-3p, miR-323-5p, miR-323a-5p, miR-2355-5p, miR-105-3p

CDK18 ENSOARGO(cyclin-dependent kinase 18) miR-2300b-3p, miR-455-3p, miR-486-3p, miR-323-5p, miR-323a-5p, miR-2355-5p, miR-105-3p

HNRNPM ENSOARGO(heteroge: miR-133b-3p, miR-876-3p, miR-505-3p, miR-133a-3p, miR-409-5p, miR-873a-5p, miR-2483-3p, miR-9-5p, novel\_121, miR-154b-5p, miR-548w, miR-505-3p, miR-487b-5p, miR-2285af, miR-216a-5p, miR-8485, miR-212-3p, miR-133a-3p, miR-9-5p, miR-452-5p, miR-1343-5p, miR-7-5p, miR-224-5p, miR-2411-3p, miR-32, miR-105-5p, miR-330-3p, miR-22841, miR-539-3p, miR-6240, miR-363-5p, miR-2284ab, miR-181a-5p, miR-7b-5p, miR-432, miR-873a-5p, miR-374b-3p, miR-3431, miR-2285g, miR-432-5p, miR-2355-3p, novel\_116, miR-339-5p, miR-206, miR-92a-3p, miR-625-3p, miR-502-5p, miR-4324, miR-199b-5p, miR-374c-5p, miR-335-5p, miR-1a-1-5p, miR-17-3p, miR-495-3p, miR-2285x, miR-1839-3p, miR-3957-3p, miR-410-5p, miR-505-3p, miR-148a-3p, miR-2387, miR-3065-5p, miR-18a-3p, miR-3591-3p, miR-3970, miR-374c-3p, miR-2404, miR-323a-5p, novel\_68, miR-7-1-3p, miR-127-5p, miR-1a-2-5p, miR-181b-5p, miR-17-3p, miR-450a-2-3p, novel\_127, miR-92a-3p, miR-152-3p, miR-2285af, miR-339a, miR-217, miR-30c-2-3p, miR-92b-3p, miR-199a-5p, miR-29a-5p, miR-3529-3p, miR-4286, miR-181a-2-3p, miR-495-5p, miR-300, miR-30c, miR-105-2, miR-1290, miR-3591-5p, miR-345-3p, miR-30a-5p, miR-1343-5p, miR-6516-5p, miR-9-5p, novel\_121, miR-129-1-3p, miR-2285ad, novel\_79, miR-196a-2-3p, miR-412, novel\_9, miR-374b-3p, miR-191-5p, miR-28-5p, miR-34c-3p, miR-1-5p, miR-100-3p, miR-374a-3p, miR-144-5p, miR-6128, miR-876-3p, miR-1248, miR-7144-5p, miR-503-3p, miR-301, miR-381-3p, miR-23b, miR-25-3p, miR-300-3p, miR-374c-3p, miR-199a-5p, miR-133c, miR-503-3p, miR-874-3p, miR-141-3p, miR-25-5p, miR-199b-5p, miR-323b-3p, miR-505, miR-29b-1-5p, miR-30c-1-3p, miR-758-3p, miR-8485, miR-494-3p, miR-1839-3p, let-7c-3p, miR-23a-3p, miR-2426, miR-450b-5p, miR-1388-5p, miR-3120-5p, miR-541, miR-758-3p, miR-412-3p, miR-323b, miR-142-5p, miR-421, miR-2285e, miR-2459, miR-455-3p, novel\_78, miR-105-1, novel\_4, miR-330-3p, miR-2300a-5p, miR-222-5p, miR-335, miR-3968, miR-2284q, miR-374a-3p, miR-30b-5p, miR-2285n, miR-2285y, miR-371a-5p, miR-877-3p, miR-1285-5p, miR-541-3p, miR-212-3p, miR-363-3p, miR-3059-5p, miR-

SEC23IP ENSOARGO(SEC23 in 3p, miR-30a-5p, miR-1343-5p, miR-6516-5p, miR-9-5p, novel\_121, miR-129-1-3p, miR-2285ad, novel\_79, miR-196a-2-3p, miR-412, novel\_9, miR-374b-3p, miR-191-5p, miR-28-5p, miR-34c-3p, miR-1-5p, miR-100-3p, miR-374a-3p, miR-144-5p, miR-6128, miR-876-3p, miR-1248, miR-7144-5p, miR-503-3p, miR-301, miR-381-3p, miR-23b, miR-25-3p, miR-300-3p, miR-374c-3p, miR-199a-5p, miR-133c, miR-503-3p, miR-874-3p, miR-141-3p, miR-25-5p, miR-199b-5p, miR-323b-3p, miR-505, miR-29b-1-5p, miR-30c-1-3p, miR-758-3p, miR-8485, miR-494-3p, miR-1839-3p, let-7c-3p, miR-23a-3p, miR-2426, miR-450b-5p, miR-1388-5p, miR-3120-5p, miR-541, miR-758-3p, miR-412-3p, miR-323b, miR-142-5p, miR-421, miR-2285e, miR-2459, miR-455-3p, novel\_78, miR-105-1, novel\_4, miR-330-3p, miR-2300a-5p, miR-222-5p, miR-335, miR-3968, miR-2284q, miR-374a-3p, miR-30b-5p, miR-2285n, miR-2285y, miR-371a-5p, miR-877-3p, miR-1285-5p, miR-541-3p, miR-212-3p, miR-363-3p, miR-3059-5p, miR-

miR-664b-3p, miR-329a-5p, miR-345-3p, miR-760-3p, miR-2284m, miR-21-3p, miR-34b-5p, miR-26a-5p, miR-210-5p, miR-2285p, miR-196a-3p, miR-200b, miR-328-3p, miR-616-3p, miR-505-3p, miR-3600, miR-34a-5p, miR-664-5p, miR-2300b-3p, miR-217-5p, miR-124-3p, miR-346, miR-142a-5p, miR-181c-5p, miR-3184-3p, miR-3074-5p, miR-214, miR-500, miR-190a-5p, miR-30e-3p, miR-15b-3p, miR-665, miR-3604, miR-30a-3p, miR-323-5p, miR-6516, miR-548o-3p, miR-140-5p, miR-30c-1-3p, miR-345-5p, miR-500a-3p, miR-30c-1-3p, miR-3187-3p, miR-382-3p, miR-124a, miR-3085-3p, miR-214-3p, miR-323b-3p, miR-142-5p, miR-421, novel\_78, miR-409b, miR-1388-5p, miR-3120-5p, miR-16-2-3p, miR-484, miR-501-3p, miR-323b, miR-877-3p, miR-502-3p, miR-885-5p, miR-3059-5p, miR-181d-5p, miR-190b-5p, miR-382-3p, miR-2483-3p, miR-500-3p, miR-203-3p, miR-452-3p, miR-3064-5p, miR-499b-5p, miR-129b-5p, miR-450b-5p, miR-200a, miR-181a-2-3p, miR-30a-3p, miR-3064-5p, miR-200c-3p, miR-181b-5p, miR-28-3p, miR-200c, miR-217, miR-30c-2-3p, miR-6516-5p, miR-505-5p, miR-582-3p, miR-429-3p, miR-7641, miR-200b-3p, miR-501-3p, miR-29d-3p, miR-145-3p, miR-28a-3p, miR-6128, miR-3607-3p, miR-2332, miR-29b-3p, miR-2284k, miR-135a-5p, miR-34c-5p, miR-331-5p, miR-300-3p, miR-2284n, miR-154b-5p, miR-3068-3p, miR-2355-5p, miR-345-5p, miR-329b, miR-10b-3p, miR-654-3p, miR-345-5p, miR-455-5p, miR-190a, miR-432-5p, miR-149-5p, miR-6238, miR-194-3p, miR-133b-5p, miR-31-5p, miR-2284ab, miR-29b, miR-455-5p, miR-188-5p, miR-181a-5p, miR-1843b-5p, miR-223-3p, miR-432, miR-449a, miR-29c-3p, novel\_101, miR-2285x, novel\_1, miR-29a, miR-147-5p, miR-142b, miR-576-3p, miR-34c, miR-670-3p, miR-29a-3p, miR-34b, miR-323a-5p, miR-2404, miR-329-5p, miR-3074-5p, miR-26b-5p, miR-6395, miR-135b-5p, miR-505-3p

miR-34b-5p, miR-329b, miR-331-5p, miR-154b-5p, miR-300-3p, miR-615-5p, miR-125a, miR-2355-5p, miR-874-3p, miR-191-5p, miR-134-5p, miR-486b-3p, miR-331-5p, miR-331-3p, miR-125b-5p, miR-100-3p, miR-5100, miR-2332, miR-378c, miR-365a-5p, miR-133a-3p, miR-193a-5p, miR-16-5p, miR-10a-5p, miR-200b-3p, let-7d, miR-330-5p, miR-134, miR-1290, miR-3591-5p, miR-196a-5p, miR-214-5p, miR-134-5p, miR-378h, miR-483-3p, miR-322-5p, miR-505-5p, novel\_79, miR-429-3p, miR-299a-3p, miR-2285ad, novel\_127, miR-107, let-7f-5p, miR-200c-3p, miR-2898, miR-450a-2-3p, miR-217, miR-339a, let-7c-5p, miR-664-3p, miR-125a-3p, miR-200c, miR-490-3p, miR-1271-3p, miR-29a-5p, miR-200a, let-7g, novel\_39, miR-28b, miR-3064-5p, miR-3529-3p, let-7e-5p, miR-6395, miR-195a-5p, miR-379-5p, miR-378f, miR-2319a, miR-7975, miR-412-3p, miR-107, miR-1291, miR-18a-3p, miR-2387, miR-6535, miR-299b-3p, miR-670-3p, miR-323a-5p, miR-10a-5p, miR-655-5p, miR-320b, miR-329-5p, miR-3074-5p, miR-6119-3p, let-7i, miR-425-5p, miR-16a, miR-28c, miR-4324, miR-1247-3p, miR-15a, miR-2284w, miR-326-3p, miR-24-3p, miR-369-5p, miR-497-5p, miR-30b-3p, miR-16b, miR-2355-3p, miR-103, novel\_116, miR-3431, let-7g-5p, miR-412-5p, miR-26b-3p, miR-339-5p, miR-103a-3p, miR-125a-5p, miR-196b-5p, miR-483-3p, novel\_51, miR-365b-5p, miR-377-3p, miR-345-5p, miR-2483-5p, miR-668-3p, miR-1827, miR-345-5p, miR-339b, miR-133b-3p, miR-129b-3p, miR-500a-3p, miR-21a-3p, let-7i-5p, miR-877-5p, miR-15b-5p, miR-323-5p, miR-10a, miR-377-3p, miR-296-3p, miR-532-5p, miR-182-5p, miR-216b-3p, miR-140-5p, miR-378a-3p, miR-2331-3p, miR-504-5p, miR-4492, miR-500, miR-874-5p, miR-424-5p, miR-664a, miR-151-3p, miR-369-5p, miR-324-3p, let-7f, miR-2285j, miR-338-3p, miR-6134, let-7b-5p, miR-346, miR-10b-5p, miR-6525, miR-214, miR-665-5p, miR-3074-5p, miR-378c, let-7h, miR-378d, miR-133a-3p, miR-184-3p, miR-378g, miR-134-3p, miR-3600, miR-9851-3p, miR-30c, miR-3120-5p, miR-744-5p, miR-147-3p, miR-30b-3p, miR-30f, miR-500a-3p, miR-30d-5p, miR-30a-5p, miR-30b-3p, miR-30e-5p, miR-488-3p, miR-30c-5p, miR-2387, miR-423-5p, miR-3184-5p, miR-143-3p, miR-3607-3p, miR-2285x, miR-500, miR-30b, miR-30b-5p, novel\_82, miR-5126, novel\_17

LRTOMT ENSOARGOC leucine

RAB7A ENSOARGOC RAB7A, m

miR-152-3p, miR-543-5p, novel\_127, miR-127-5p, miR-200c-3p, let-7f-5p, miR-181b-5p, miR-17-3p, miR-217, let-7c-5p, miR-30c-2-3p, miR-200c, miR-490-3p, miR-2285b, miR-2284a, novel\_39, let-7g, miR-199a-5p, miR-29a-5p, miR-2284y, miR-148b-5p, miR-181a-2-3p, miR-30a-3p, miR-128-3p, miR-200b-3p, let-7d, miR-23b-5p, miR-3578, miR-134, miR-345-3p, miR-545-5p, miR-134-5p, miR-450a-1-3p, miR-758-5p, miR-7641, miR-429-3p, miR-299a-3p, miR-134-5p, novel\_9, miR-331-3p, miR-26c, miR-125b-5p, miR-5100, miR-2332, miR-2284k, miR-145-3p, miR-323-3p, miR-2284v, miR-1306-5p, miR-1248, miR-23a-5p, miR-345-5p, miR-3154, miR-137-3p, miR-200a-5p, miR-424-3p, miR-2448-3p, miR-199a-5p, miR-769, miR-125a, miR-125a-5p, miR-136-3p, miR-194a, miR-2411-3p, miR-377-3p, miR-503-3p, miR-345-5p, let-7j, miR-432-3p, miR-22841, miR-654-3p, miR-432-3p, miR-382, miR-27b-3p, miR-2284ab, miR-145a-5p, miR-3071-5p, miR-194-5p, miR-450c-3p, miR-1843b-5p, miR-1434-3p, miR-181a-5p, miR-134-3p, let-7g-5p, miR-2284d, miR-412-5p, miR-665, miR-31-5p, miR-502b, miR-382-5p, let-7i, miR-133a-5p, miR-6402, miR-2428, miR-199b-5p, novel\_27, miR-24-3p, miR-17-3p, novel\_101, miR-136-3p, let-7e-5p, miR-412-3p, miR-450b-3p, miR-3065-5p, miR-216a-3p, miR-18a-3p, miR-378b, miR-2387, miR-148a-3p, miR-299b-3p, miR-3120-3p, miR-320b, miR-3074-5p, miR-378b, miR-216b-3p, miR-2484, miR-299-3p, let-7k, miR-221-5p, miR-760-3p, miR-98-5p, miR-466i-5p, miR-202-5p, miR-125b, miR-185-3p, miR-92a-1-5p, miR-345-3p, miR-500a-5p, miR-130a-5p, miR-29b-1-5p, miR-345-3p, miR-195a-3p, miR-216c-5p, miR-148a-5p, miR-664-5p, novel\_73, miR-33b-3p, miR-1197-5p, miR-217-5p, miR-5703, miR-1434-5p, miR-2300b-3p, miR-1961, novel\_133, miR-199a-3p, miR-148b-3p, miR-200b, miR-222-5p, miR-7859, miR-30d-3p, miR-18a-3p, miR-548a-3p, miR-129-5p, miR-1109, miR-1468, miR-7977, novel\_68, miR-664b, miR-181b-3p, miR-677, miR-669, miR-144-5p, miR-374c-3p, miR-670-3p, miR-18a-3p, miR-1306, miR-409-5p, miR-361-3p, miR-1983, novel\_94, miR-6516-3p, miR-7975, miR-146b-5p, miR-412-3p, miR-1291, miR-190b-5p, miR-2285x, miR-2284w, miR-7705, miR-371b-3p, miR-382-5p, novel\_87, miR-2285y, novel\_82, miR-6123, miR-490-5p, miR-4726-5p, miR-181b-2-3p, novel\_78, miR-133b-5p, miR-2355-3p, miR-544b, miR-2285e, miR-9788-3p, miR-149-5p, novel\_116, miR-503-5p, miR-496-5p, miR-153, miR-2285g, miR-22-3p, miR-1434-3p, miR-484, miR-744-5p, miR-1839-5p, miR-101c, miR-2426, miR-544a, miR-138, miR-668-3p, miR-22841, novel\_51, miR-29b-1-5p, miR-146a, miR-1306-5p, miR-503-5p, miR-214-3p, miR-146b, miR-153-3p, miR-1343-5p, miR-378a-5p, miR-2285aa, miR-874-3p, miR-2331-3p, miR-376c-3p, miR-22-3p, miR-6130, miR-376e-3p, miR-544-3p, miR-129b-3p, miR-500a-3p, miR-301, miR-2285c, miR-1827, miR-23a-5p, miR-885-3p, miR-214, miR-425-5p, miR-144-5p, miR-4510, miR-29b-2-5p, miR-132-5p, miR-500, miR-410-3p, miR-874-5p, miR-6516-3p, novel\_74, miR-138-5p, miR-6517, miR-18a-3p, miR-582-3p, miR-23b-5p, miR-1343-5p, novel\_133, miR-184-3p, miR-885-3p, miR-4286, miR-29b-2-5p, miR-495-5p, miR-503-5p, miR-146a-5p, miR-376c-3p, miR-29b-1-5p, miR-324-3p, miR-125a-3p, miR-664-3p, novel\_127, miR-760-3p, miR-450a-2-3p, miR-2898



miR-2285p, miR-8117, miR-92a-1-5p, miR-17-3p, miR-106a, miR-543-5p, miR-299-3p, miR-221-5p, miR-2403, miR-20a, miR-1, miR-29b-2-5p, miR-5100, miR-380-5p, miR-29b-1-5p, miR-2284a, miR-143-3p, miR-192-3p, novel\_39, miR-29a-5p, miR-2284y, miR-193b-5p, miR-140-3p, miR-10a-5p, miR-148a-5p, miR-106a, miR-299a-3p, miR-18b-5p, miR-1b-3p, miR-210-3p, miR-450a-1-3p, miR-29b-2-5p, miR-3604, miR-331-3p, miR-664a, miR-17-3p, miR-450b-3p, miR-130b-5p, miR-1306-5p, miR-133a-3p, miR-6128, miR-206-3p, miR-10b-5p, miR-93, miR-365a-5p, miR-450a-1-3p, miR-2448-3p, miR-488-3p, miR-17-5p, miR-18a, miR-93-5p, miR-200a-5p, miR-137-3p, miR-18a-5p, miR-133b-3p, miR-20b-5p, miR-221-5p, miR-296-3p, miR-21-3p, miR-10a, miR-154b-5p, miR-324-5p, novel\_51, miR-106b-5p, miR-17-5p, miR-106a-5p, miR-365b-5p, miR-29b-1-5p, miR-103a-2-5p, miR-452-5p, miR-106a-5p, miR-380-5p, miR-130b-5p, miR-503-3p, miR-193a, miR-10b, miR-181a-5p, miR-296-5p, miR-3071-5p, miR-450c-3p, miR-1a-3p, novel\_4, miR-425-3p, miR-496-5p, miR-20b, miR-411-5p, miR-148b-5p, miR-20a-5p, novel\_82, novel\_87, miR-107-5p, miR-206, miR-3968, miR-2284q, miR-219b-3p, miR-181d-5p, miR-17-3p, miR-24-3p, miR-2428, miR-1285-5p, miR-18b, miR-2387, miR-3591-3p, miR-3970, miR-877-3p, miR-10a-5p, miR-499b-5p, miR-299b-3p, miR-489, miR-4443, miR-216a-5p, miR-185-3p, miR-125b, miR-30d, miR-21-3p, miR-760-3p, miR-216c-5p, miR-183-5p, miR-29b-1-5p, miR-124-3p, miR-140-3p, miR-188-3p, miR-5703, miR-1193, novel\_133, miR-2300b-3p, miR-215-5p, miR-376a-5p, miR-505-3p, miR-548e-3p, miR-532-3p, miR-148b-3p, miR-200b, miR-19b-1-5p, miR-324-3p, miR-655-3p, miR-708-5p, miR-6516-3p, miR-1271, miR-425-5p, miR-2330-3p, miR-6134, let-7g-3p, miR-30f, miR-21-3p, miR-182-5p, miR-545-3p, miR-22-3p, novel\_25, miR-544-3p, miR-192-5p, novel\_103, miR-1306-5p, miR-326, miR-3085-3p, miR-3955-3p, miR-2330-5p, miR-30b-3p, miR-484, miR-3120-5p, miR-544a, miR-216a-3p, miR-2320-3p, miR-30b-5p, miR-7134-3p, miR-4726-5p, miR-335, miR-452-5p, miR-194b-5p, novel\_60, miR-3059-5p, miR-212-3p, miR-541-3p, miR-129b-5p, miR-361-3p, miR-499b-5p, miR-7977, miR-3064-5p, miR-7857-3p, miR-3082-5p, miR-489, miR-1260a, miR-200c, miR-543-5p, miR-200c-3p, miR-490-3p, miR-1271-3p, miR-2284a, miR-218-2-3p, miR-30a-5p, miR-3578, miR-200b-3p, miR-128-3p, let-7a-2-3p, miR-7641, miR-376a-5p, miR-423-3p, miR-545-5p, miR-302a-5p, miR-1271-5p, miR-331-3p, miR-1306-3p, miR-5100, miR-28-5p, miR-486b-3p, miR-138-5p, let-7g-3p, miR-615-5p, miR-141-3p, miR-215-5p, miR-154b-5p, miR-365a-3p, miR-224-5p, miR-125a-5p, miR-124-5p, miR-2483-5p, miR-345-5p, miR-3071-5p, miR-194-5p, miR-1434-3p, miR-1285, miR-744-5p, miR-2889, miR-138, miR-30b-3p, miR-1260b, miR-130a-3p, miR-665, miR-133b-5p, miR-544b, miR-432-5p, miR-147-5p, miR-502b, novel\_1, miR-2285x, novel\_120, novel\_27, miR-326-3p, miR-2428, miR-24-3p, miR-1307-3p, miR-18a-3p, miR-2387, miR-6516-3p, miR-505-3p, miR-376a-2-5p, miR-1291, miR-320b, miR-363, miR-324-3p, miR-30b, miR-210-5p, miR-208b-3p, novel\_17, miR-369-3p, miR-486-3p, miR-143-3p, miR-664b-3p, miR-30c-5p, miR-218-1-3p, miR-2284u, miR-193-3p, miR-33b-3p, miR-142-3p, miR-219-

TTPAL ENSOARGO(tocopherol)

TRAPPC9 ENSOARGO(trafficking)

|       |                    |                                                                                                                                                                                                                                                                                                                                                                                                                                                                                                                                                                                                                                                                                                                                                                                                                                                                                                                                                                                                                                                                                                                                                                                                                                                                                                                                                                                                                                                                                                                                                                                               |
|-------|--------------------|-----------------------------------------------------------------------------------------------------------------------------------------------------------------------------------------------------------------------------------------------------------------------------------------------------------------------------------------------------------------------------------------------------------------------------------------------------------------------------------------------------------------------------------------------------------------------------------------------------------------------------------------------------------------------------------------------------------------------------------------------------------------------------------------------------------------------------------------------------------------------------------------------------------------------------------------------------------------------------------------------------------------------------------------------------------------------------------------------------------------------------------------------------------------------------------------------------------------------------------------------------------------------------------------------------------------------------------------------------------------------------------------------------------------------------------------------------------------------------------------------------------------------------------------------------------------------------------------------|
|       |                    | miR-2428, miR-3968, miR-101-3p, miR-378e, miR-664b, miR-378b, miR-6395, miR-378f, miR-1291, miR-216a-3p, miR-2387, miR-2310, miR-378d, miR-378a-5p, miR-29b-1-5p, miR-2957, miR-9788-3p, miR-216a-3p, miR-185-5p, miR-339-5p, miR-1343-3p, miR-3120-5p, miR-378c, miR-1260b, miR-125b-2-3p, miR-873a-5p, miR-378b, miR-484, miR-542-3p, miR-1843b-5p, miR-378c, miR-122-                                                                                                                                                                                                                                                                                                                                                                                                                                                                                                                                                                                                                                                                                                                                                                                                                                                                                                                                                                                                                                                                                                                                                                                                                      |
| TNPO3 | ENSOARGO( transpor | 5p, miR-1260b, miR-3074-2-3p, miR-539-5p, miR-378c, miR-145a-3p, miR-3432a, miR-664a, miR-6516-3p, miR-665, miR-151b, miR-532-5p, miR-574-5p, miR-378a-3p, miR-221-5p, miR-1814c, miR-339b, miR-329b, miR-143-3p, miR-29b-1-5p, miR-664b-3p, miR-221-5p, miR-466i-5p, miR-339a, miR-422a, miR-1260a, miR-664-3p, miR-532-3p, miR-151-5p, miR-328-3p, miR-378h, novel_79, miR-128-3p, miR-378a-3p, miR-378i                                                                                                                                                                                                                                                                                                                                                                                                                                                                                                                                                                                                                                                                                                                                                                                                                                                                                                                                                                                                                                                                                                                                                                                    |
|       |                    | miR-769-5p, miR-2440, novel_82, miR-3958-3p, miR-452-5p, miR-541-3p, miR-877-3p, miR-362-5p, miR-199b-5p, miR-493-5p, miR-20a-3p, miR-378e, miR-378g, miR-16b, miR-362-3p, miR-326, miR-320b, miR-199b-5p, miR-424-5p, miR-124a, miR-491-3p, miR-8485, miR-378d, miR-3962, miR-4791, miR-541, miR-484, miR-296-5p, miR-378b, miR-329-3p, miR-3120-5p, miR-544a, miR-378c, miR-362-3p, miR-2300a-5p, miR-500-5p, miR-455-3p, miR-665, miR-19b-1-5p, miR-4492, miR-155-5p, miR-17-3p, miR-378c, miR-769-5p, miR-1827, miR-216b-3p, miR-378a-3p, miR-155-5p, miR-15b-5p, miR-544-3p, miR-422a, miR-210-5p, miR-760-3p, miR-466i-5p, miR-320d, miR-5703, miR-378a-3p, miR-124-3p, miR-362-3p, miR-378i, miR-4429, miR-142-3p, miR-493-3p, miR-3600, miR-18a-3p, miR-200b, miR-15a-5p, miR-16a, miR-28c, miR-133a-5p, miR-15a, miR-17-3p, miR-219b-3p, miR-2428, miR-199b-5p, miR-326-3p, miR-24-3p, miR-21c, miR-18a-3p, miR-378f, miR-195a-5p, miR-107, miR-1291, miR-363, miR-320c, miR-365b-5p, miR-7-5p, miR-466f-3p, miR-196b-5p, miR-2483-5p, miR-493-5p, miR-7b-5p, miR-19b-2-5p, miR-432, miR-653, miR-4508, miR-497-5p, miR-16b, miR-21-5p, miR-103a-3p, miR-103, miR-544b, miR-134-3p, miR-3535, miR-432-5p, miR-6740-5p, miR-135a-1-3p, miR-16-5p, miR-365a-5p, miR-378c, miR-500b-5p, miR-323-3p, miR-362-5p, miR-320a, miR-7144-5p, miR-329b, miR-329a, miR-2285aa, miR-199a-5p, miR-223-5p, miR-769, novel_127, miR-107, miR-17-3p, miR-181a-2-3p, miR-199a-5p, miR-28b, miR-148b-5p, miR-330-5p, miR-196a-5p, miR-155-5p, miR-200b-3p, miR-429-3p, novel_121, miR-378h, miR-322-5p |
| ETFDH | ENSOARGO( electron |                                                                                                                                                                                                                                                                                                                                                                                                                                                                                                                                                                                                                                                                                                                                                                                                                                                                                                                                                                                                                                                                                                                                                                                                                                                                                                                                                                                                                                                                                                                                                                                               |

miR-133b-5p, miR-31-5p, miR-130a-3p, miR-134-3p, miR-1843b-5p, miR-1434-3p, miR-450c-3p, miR-29b, miR-188-5p, miR-382, miR-432-3p, novel\_51, miR-29a-3p, miR-299b-3p, miR-2285ab, miR-1306, miR-412-3p, miR-29c-3p, miR-1193, miR-211, miR-199b-5p, miR-301b-3p, miR-2284w, miR-382-5p, miR-29a, miR-203b-5p, miR-656-5p, miR-299a-3p, miR-412, miR-450a-1-3p, miR-30a-5p, miR-29d-3p, miR-300, miR-30c, miR-181a-2-3p, miR-4286, miR-30a-3p, miR-3064-5p, miR-2478, miR-1271-3p, miR-490-3p, miR-199a-5p, miR-125a-3p, miR-30c-2-3p, miR-1271, miR-2355-5p, miR-769, miR-199a-5p, miR-30e-5p, miR-2318, miR-876-3p, miR-10b-3p, miR-193a-5p, miR-370-5p, miR-29b-3p, miR-204-5p, novel\_4, miR-455-3p, miR-541, miR-484, miR-412-3p, miR-299a-5p, miR-744-3p, miR-676-3p, miR-30c-1-3p, miR-1306-5p, miR-182-5p, miR-29b-1-5p, miR-130b-3p, miR-3085-3p, miR-199b-5p, miR-3064-5p, miR-139-5p, miR-211-5p, miR-499b-5p, miR-541-5p, miR-7857-3p, miR-378g, miR-199b-5p, miR-361-3p, miR-129b-5p, miR-668-5p, miR-1983, miR-541-3p, miR-2285f, miR-8095, miR-218-5p, miR-30b-5p, miR-1973, miR-769-5p, miR-3968, miR-499a-5p, miR-2285t, miR-30d-3p, miR-3600, miR-1247-5p, novel\_83, miR-30c-5p, novel\_133, miR-1193, miR-188-3p, miR-2904, miR-142-3p, miR-493-3p, miR-216c-5p, miR-125b-2-3p, miR-376a-5p, miR-29b-1-5p, miR-210-5p, miR-30b, miR-92a-1-5p, miR-299-3p, miR-30c-1-3p, miR-2331-3p, miR-296-3p, miR-182-5p, miR-370-5p, miR-139-5p, miR-6130, miR-2284s, miR-301a-3p, miR-450a-1-3p, miR-299, miR-30f, miR-2312, miR-186-5p, miR-4510, miR-145a-3p, miR-3074-2-3p, miR-769-5p, miR-338-3p, miR-30e-3p, miR-30a-3p, miR-450b-3p, miR-129-5p, miR-454-3p, miR-208b-5p

ACAA2 ENSOARGO(acetyl-C<sub>6</sub>) miR-664a, miR-2428, miR-129-1-3p, miR-485-5p, miR-103a-2-5p, miR-129-2-3p, miR-107-5p

MFSD4 ENSOARGO(major fa

SERINC3 ENSOARGO( serine i:

miR-941, miR-4429, miR-19b-3p, miR-128-3p, miR-134, miR-188-3p, miR-29d-3p, miR-15a-5p, miR-1271-5p, miR-322-5p, miR-7859, miR-129-1-3p, miR-214-5p, miR-2284z, miR-134-5p, miR-532-3p, miR-431, miR-212-5p, miR-320d, miR-17-3p, miR-107, miR-1277-5p, novel\_17, miR-2285af, miR-324-3p, miR-3071-3p, miR-376c-3p, miR-29b-1-5p, miR-490-3p, miR-1271-3p, miR-3065-3p, miR-181a-2-3p, miR-30a-3p, miR-671-5p, miR-7144-5p, miR-376c-5p, miR-424-3p, miR-488-3p, miR-299, miR-21a-3p, miR-320a, miR-376c-5p, miR-769, miR-376e-3p, miR-377-3p, miR-301a-3p, miR-376c-3p, miR-15b-5p, miR-2331-3p, miR-140-5p, miR-3065-3p, miR-370-3p, miR-17-3p, miR-138-5p, miR-134-5p, miR-424-5p, miR-454-3p, miR-30e-3p, miR-5100, miR-29b-3p, miR-30a-3p, miR-769-5p, miR-129-2-3p, miR-144-5p, miR-1271, miR-16-5p, miR-299a-5p, miR-138, miR-29b, miR-16b, miR-26a-2-3p, miR-497-5p, miR-2284aa, miR-1298-5p, novel\_23, miR-103, miR-6238, novel\_78, miR-330-3p, miR-133b-5p, miR-103a-3p, miR-31-5p, miR-130a-3p, miR-377-3p, miR-431-5p, miR-320b, miR-16b, miR-29b-1-5p, miR-330-3p, miR-2284l, miR-1b-5p, miR-424-5p, miR-6240, miR-1388-3p, miR-19a-3p, miR-107, miR-96-5p, miR-195a-5p, miR-9-3p, miR-2285ab, miR-361-3p, miR-216a-3p, miR-150-5p, miR-3970, miR-29a-3p, miR-320c, miR-2285u, miR-29a, miR-128-1-5p, miR-2440, miR-15a, novel\_82, miR-382-5p, miR-769-5p, miR-16a, miR-877-3p, miR-301b-3p, miR-9-3p, novel\_27, miR-3059-5p, miR-17-3p, miR-29c-3p, miR-2285f

miR-148a-3p, miR-3141, miR-2319a, miR-412-3p, miR-329-5p, miR-6535, miR-669, miR-299b-3p, miR-374c-3p, miR-485-3p, miR-1247-3p, miR-576-3p, miR-28c, miR-193b-3p, miR-1a-1-5p, miR-450c-3p, miR-2113, miR-4508, miR-27b-3p, miR-188-5p, miR-339-5p, miR-31-5p, miR-194-3p, miR-134-3p, miR-2285v, miR-3141, miR-105-5p, miR-365b-5p, miR-194a, novel\_51, miR-2411-3p, miR-193a-3p, miR-483-3p, let-7f-2-3p, let-7f-2-3p, miR-6240, miR-2285r, miR-23b, miR-331-5p, miR-2474, miR-2285aa, miR-125a, miR-376c-3p, miR-331-5p, miR-300-3p, miR-125b-5p, miR-2433, novel\_63, miR-331-5p, novel\_9, novel\_42, miR-1197-3p, miR-2427, miR-1343-5p, miR-330-5p, miR-885-3p, novel\_79, miR-1224-5p, miR-18b-5p, miR-299a-3p, miR-429-3p, miR-2284z, miR-450a-1-3p, novel\_121, miR-505-5p, miR-152-3p, novel\_96, miR-1a-2-5p, miR-376a-3p, miR-1983, miR-504, miR-139-5p, miR-2319b, miR-203-3p, miR-4443, miR-1185-2-3p, miR-378g, miR-25, miR-3596, miR-218-5p, miR-2440, miR-3964, miR-3968, miR-361-3p, miR-1839-5p, miR-199b-3p, miR-330-3p, miR-2459, miR-1185-3p, miR-1298-3p, miR-376b-3p, novel\_19, miR-199a-3p, miR-214-3p, miR-491-5p, miR-23a-3p, miR-1388-3p, miR-101b-3p, miR-450a-1-3p, miR-885-3p, miR-1827, miR-339b, miR-30c-1-3p, miR-504-5p, miR-376e-3p, miR-10a, miR-665, miR-2285j, miR-4492, miR-129-5p, miR-665-5p, miR-214, miR-122-5p, miR-6525, miR-346, novel\_44, miR-218-1-3p, miR-493-3p, miR-33b-3p, miR-2284h-5p, miR-328-3p, miR-23b-3p, miR-7859, miR-23c, miR-324-3p, miR-92a-1-5p, miR-345-3p, miR-369-3p, miR-345-3p, miR-2285w, miR-143-3p, miR-376c-3p, miR-376b-3p, miR-2285ab, miR-18b, miR-379-5p, miR-6395, miR-505-3p, miR-450b-3p, miR-1291, miR-19a-3p, miR-10a-5p, miR-146b-3p, miR-670-3p, miR-199c, miR-147-5p, miR-128-1-5p, novel\_101, miR-136-3p, novel\_27, miR-326-3p, miR-2428, miR-24-3p, miR-371b-3p, miR-104-5p, miR-3071-5p, miR-744-5p, miR-

miR-147a, miR-1298-3p, miR-2300a-5p, miR-199b-3p, novel\_78, miR-1343-3p, miR-181b-2-3p, miR-1388-5p, miR-378c, miR-544a, miR-450b-5p, miR-21b, miR-2284r, miR-484, miR-378b, miR-301b-5p, miR-10b, miR-7857, miR-125b-2-3p, miR-378d, miR-8485, miR-193a, miR-33a-5p, miR-3085-3p, miR-199b-5p, miR-103a-2-5p, miR-214-3p, miR-199a-3p, miR-320b, miR-1306-5p, miR-378g, miR-378e, miR-489, miR-4443, miR-3064-5p, miR-2319b, miR-452-3p, miR-20a-3p, miR-211-5p, miR-126b-5p, miR-504, miR-1983, miR-199b-5p, miR-378j, miR-877-3p, miR-361-3p, novel\_111, miR-423-5p, miR-3059-5p, miR-452-5p, novel\_82, miR-107-5p, miR-301a-5p, miR-95-3p, miR-199a-3p, miR-532-3p, miR-328-3p, miR-18a-3p, miR-4429, miR-664-5p, miR-378d, miR-378i, miR-2300b-3p, miR-378a-3p, miR-1197-5p, miR-5703, miR-1193, miR-376a-5p, miR-181b-1-3p, miR-486-3p, miR-320d, miR-760-3p, miR-99a-3p, miR-466i-5p, miR-21-3p, miR-299-3p, miR-324-3p, miR-500a-5p, miR-345-3p, miR-125b, miR-422a, miR-10a, miR-544-3p, miR-6516, miR-377-3p, miR-323-5p, miR-6130, miR-216b-5p, novel\_32, miR-378a-3p, miR-140-5p, miR-504-5p, miR-216b-3p, let-7g-3p, miR-339b, miR-345-5p, miR-625-5p, miR-21a-3p, miR-450a-1-3p, miR-6525, miR-10b-5p, miR-206-3p, miR-224-5p, miR-346, miR-3184-5p, miR-338-3p, miR-378c, miR-539-5p, miR-145a-3p, miR-4510, miR-3074-5p, miR-129-2-3p, miR-214, miR-665-5p, miR-450b-3p, miR-664a, miR-208b-5p, miR-874-5p, miR-324-3p, miR-320e, miR-432-5p, miR-134-3p, miR-3431, miR-194-3p, miR-149-5p, miR-544b, miR-339-5p, miR-138, miR-455-5p, miR-7862, miR-873a-5p, miR-432, miR-450c-3p, let-7a-2-3p, miR-345-5p, miR-380-5p, miR-668-3p, miR-378a-5p, miR-125a-5p, miR-224-5p, miR-377-3p, novel\_51, miR-455-5p, miR-2411-3p, miR-323a-5p, miR-299b-3p, miR-670-3p, miR-677, miR-320c, miR-6535, miR-181b-3p, novel\_68, miR-378b, miR-3074-5p, miR-10a-5p, miR-1291, miR-

novel\_73, miR-142-3p, miR-33b-3p, miR-34a-5p, miR-664-5p, miR-193b-5p, miR-1434-5p, miR-217-5p, miR-95-3p, miR-18a-3p, miR-30d-3p, miR-212-5p, miR-210-5p, miR-92a-1-5p, miR-324-3p, miR-3601, miR-143-3p, miR-486-3p, miR-503-5p, miR-345-5p, miR-1827, miR-885-3p, miR-2285c, miR-450a-1-3p, miR-216b-5p, miR-15b-5p, miR-504-5p, novel\_74, miR-130b-5p, miR-1468-5p, miR-874-5p, miR-664a-5p, miR-224-5p, miR-346, miR-6525, miR-181c-5p, miR-3184-5p, miR-122-5p, miR-1388-5p, miR-101c, miR-301b-5p, miR-541, miR-1a-3p, miR-501-3p, miR-2459, miR-455-3p, miR-330-3p, novel\_78, miR-181b-2-3p, miR-381-5p, miR-199a-3p, miR-182-5p, miR-16b, miR-2310, miR-1388-3p, miR-504, miR-335-3p, miR-500-3p, miR-4443, miR-2319b, miR-139-5p, miR-24-1-5p, miR-211-5p, miR-499a-5p, miR-3968, novel\_82, miR-301a-5p, miR-877-3p, miR-423-5p, miR-2447, miR-9-5p, miR-885-3p, miR-1290, miR-330-5p, miR-9-5p, miR-322-5p, miR-505-5p, miR-486-5p, novel\_121, miR-134-5p, miR-450a-1-3p, miR-429-3p, miR-412, miR-200a-3p, novel\_127, miR-152-3p, miR-8117, miR-125a-3p, miR-450b-5p, miR-29a-5p, miR-2284f, miR-3064-5p, miR-345-5p, miR-2474, miR-1248, miR-574-5p, miR-1271, miR-125a, miR-2355-5p, miR-134-5p, miR-125b-5p, miR-6740-5p, miR-1260b, miR-16-5p, miR-193a-5p, miR-381-5p, miR-16b, miR-188-5p, miR-497-5p, miR-542-3p, miR-7b-5p, miR-450c-3p, miR-3431, miR-194-3p, miR-149-5p, miR-31-5p, miR-106b-3p, miR-582, miR-7-5p, miR-3141, miR-105-5p, miR-6240, miR-2284e, miR-148a-3p, miR-3141, miR-1306, miR-150-5p, miR-3970, miR-181b-3p, miR-669, miR-677, miR-206, miR-28c, miR-4324, miR-2284o, miR-1246, miR-2300b-3p, miR-1197-5p, miR-188-3p, miR-140-3p, miR-5703, miR-200b, miR-148b-3p, miR-15a-5p, miR-487a-3p, miR-383-5p, miR-199a-3p, novel\_83, miR-466i-5p, miR-760-3p, miR-2284m, miR-1277-5p, miR-34b-5p, miR-125b, miR-185-3p, miR-216a-5p, let-7c-3p, miR-21a-3p, miR-130-5p, miR-

miR-376a-5p, miR-1961, miR-140-3p, miR-33b-3p, miR-34a-5p, miR-378d, miR-3600, miR-200b, miR-148b-3p, miR-23c, miR-23b-3p, miR-383-5p, miR-210-3p, miR-26a-5p, miR-345-3p, miR-500a-5p, miR-98-5p, miR-202-5p, let-7k, miR-2484, miR-34b-5p, miR-30b-3p, miR-345-3p, miR-195a-3p, miR-377-5p, miR-376a-5p, miR-143-3p, miR-2432, miR-2285c, miR-21a-3p, miR-433-3p, miR-30d-5p, miR-129b-3p, miR-345-5p, novel\_99, miR-1827, miR-504-5p, miR-545-3p, miR-216b-3p, miR-656-3p, miR-216b-5p, miR-6130, miR-10a, miR-301a-3p, miR-6516, miR-877-5p, let-7i-5p, miR-204-3p, miR-2285j, let-7f, miR-320e, miR-19b-1-5p, miR-132-5p, miR-130b-5p, miR-190a-5p, miR-454-3p, miR-4510, miR-3074-5p, let-7b, miR-224-5p, miR-6525, miR-10b-5p, let-7b-5p, miR-10b, miR-4791, miR-1298-5p, miR-6529a, miR-484, miR-758-3p, miR-2426, miR-1388-5p, miR-1839-5p, miR-16-2-3p, miR-2284aa, miR-101c, novel\_78, miR-105-1, miR-2300a-5p, miR-145b, miR-539-5p, miR-2459, miR-2285e, miR-148b-5p, miR-9788-3p, miR-1306-5p, miR-326, miR-3955-3p, miR-130b-3p, miR-3085-3p, let-7e, miR-103a-2-5p, miR-2285o, miR-494-3p, miR-1388-3p, let-7a-5p, miR-33a-5p, miR-652-5p, miR-23a-3p, miR-758-3p, miR-193a, miR-504, miR-3963, miR-9-3p, miR-877-3p, miR-452-3p, miR-20a-3p, miR-2319b, miR-3064-5p, miR-7977, miR-2483-3p, miR-378g, miR-25, miR-4443, miR-203-3p, let-7d-5p, miR-101-3p, miR-382-3p, miR-218-5p, miR-107-5p, miR-371a-5p, miR-3964, miR-3956-3p, novel\_60, miR-2447, miR-190b-5p, miR-2285f, miR-7705, miR-1290, miR-134, miR-345-3p, miR-3591-5p, miR-23b-5p, miR-330-5p, miR-30a-5p, let-7d, miR-10a-5p, miR-105-2, miR-200b-3p, miR-429-3p, miR-6517, miR-196a-2-3p, miR-6516-5p, miR-505-5p, miR-134-5p, miR-2284z, miR-664-3p, miR-200c, let-7c-5p, miR-200c-3p, miR-127-5p, let-7f-5p, miR-2898, miR-152-3p, miR-543-5p, miR-200a-3p, miR-3529-3p, miR-3064-5p, miR-



miR-339-5p, miR-377-5p, miR-31-5p, miR-133b-5p, miR-544b, miR-2284d, miR-185-5p, miR-450c-3p, novel\_23, miR-653, miR-873a-5p, miR-7b-5p, miR-1434-3p, miR-29b, miR-2284ab, miR-30b-3p, miR-219a-1-3p, miR-16-1-3p, miR-363-5p, let-7f-2-3p, let-7f-2-3p, miR-380-5p, miR-130b-5p, miR-345-5p, miR-2285r, miR-32, miR-105-5p, novel\_51, miR-224-5p, miR-7-5p, miR-146a, miR-660, miR-452-5p, miR-125a-5p, miR-378a-5p, miR-7-1-3p, miR-3120-3p, miR-6535, miR-299b-3p, novel\_69, miR-29a-3p, miR-670-3p, miR-1306, miR-3970, miR-3591-3p, miR-216a-3p, miR-18b, miR-146b-5p, miR-135b-5p, miR-410-5p, miR-3957-3p, miR-758-5p, miR-29c-3p, miR-17-3p, miR-335-5p, novel\_27, miR-2284w, miR-211, miR-24-3p, miR-4324, miR-1247-3p, miR-28c, miR-421-5p, miR-502b, miR-92a-3p, novel\_1, miR-29a, miR-7641, novel\_79, miR-18b-5p, miR-431, miR-2285ad, miR-299a-3p, miR-2284z, miR-450a-1-3p, miR-129-1-3p, miR-9-5p, miR-218-2-3p, miR-29d-3p, miR-30a-5p, miR-128-3p, miR-105-2, miR-155-5p, miR-29b-2-5p, miR-30a-3p, miR-181a-2-3p, miR-4286, miR-2403, miR-490-3p, miR-380-5p, miR-28b, miR-92b-3p, miR-30c-2-3p, miR-3071-3p, miR-339a, miR-92a-3p, miR-200a-3p, miR-17-3p, miR-28-3p, miR-125a, miR-141-3p, miR-2284n, miR-25-3p, miR-365a-3p, miR-769, miR-18a, miR-3154, miR-30e-5p, miR-301, miR-2448-3p, miR-7144-5p, miR-1248, miR-876-3p, miR-345-5p, miR-329a, miR-3607-3p, miR-103b, miR-28a-3p, miR-100-3p, miR-125b-5p, miR-135a-5p, miR-29b-3p, novel\_63, miR-135a-1-3p, miR-486b-3p, miR-204-5p, miR-592, miR-28-5p, miR-5010-3p, miR-105-1, miR-1185-3p, miR-425-3p, miR-147a, miR-30b-3p, miR-329-3p, miR-2284aa, miR-362-3p, miR-1388-5p, miR-450b-5p, miR-544a, miR-33a-5p, miR-494-3p, miR-3187-3p, miR-30c-1-3p, miR-2957, miR-29b-1-5p, miR-362-3p, novel\_103, miR-431-5p, miR-1306-5p, miR-146b, miR-214-3p, miR-1185-5p, miR-211-5p, miR-202-3p, miR-1185-2-3p, miR-2506, miR-25, miR-2082-5p, miR-151-5p, miR-199a-3p, miR-214-5p, miR-1224-5p, miR-7641, miR-431, miR-30c, miR-378d, miR-885-3p, miR-493-3p, miR-33b-3p, miR-4429, miR-1343-5p, miR-2904, miR-5703, miR-30a-5p, miR-30c-5p, miR-615-3p, miR-486-3p, miR-143-3p, miR-450b-5p, miR-142a-3p, miR-495-5p, miR-29b-2-5p, miR-30d, miR-320d, miR-760-3p, miR-181b-5p, miR-219b-5p, miR-125b, miR-205-5p, miR-30b, miR-542-5p, miR-210-5p, novel\_32, miR-151b, miR-877-5p, miR-3957, miR-193b-3p, miR-6130, miR-370-3p, miR-542-5p, miR-125a, miR-615-5p, miR-3957-5p, miR-140-5p, miR-885-3p, miR-1895, miR-1248, miR-1827, miR-671-5p, miR-876-3p, miR-30f, miR-27b-5p, miR-320a, miR-30d-5p, miR-30e-5p, miR-181c-5p, miR-193a-5p, miR-214, miR-665-5p, novel\_42, miR-4510, miR-145a-3p, miR-708-5p, miR-4492, miR-486b-3p, miR-28-5p, miR-592, miR-125b-5p, miR-29b-2-5p, miR-2459, miR-2355-3p, miR-432-5p, miR-142-3p, miR-1343-3p, miR-7862, miR-125b-2-3p, miR-432, miR-181a-5p, miR-654-3p, miR-2330-5p, miR-125a-5p, miR-1343-5p, miR-193a-3p, miR-542-5p, miR-214-3p, novel\_124, miR-320b, miR-199a-3p, miR-431-5p, miR-1306-5p, miR-320c, miR-669, miR-670-3p, miR-499b-5p, miR-1291, miR-1306, miR-2428, miR-361-3p, miR-877-3p, miR-193b-3p, miR-542-5p, miR-219a-5p, miR-181d-5p, miR-30b-5p, miR-502-5p, miR-615

miR-876-3p, miR-345-5p, miR-329a, miR-20b-5p, miR-93-5p, miR-133c, miR-2355-5p, novel\_9, novel\_63, miR-1197-3p, miR-1260b, novel\_42, miR-28a-3p, miR-129-1-3p, miR-429-3p, miR-1224-5p, miR-28-3p, let-7f-5p, miR-1a-2-5p, novel\_96, miR-148b-5p, let-7g, novel\_39, miR-29a-5p, miR-2285b, miR-3064-5p, miR-410-5p, let-7e-5p, miR-150-5p, miR-3065-5p, miR-3591-3p, novel\_69, novel\_68, miR-3074-5p, miR-3120-3p, miR-26b-5p, miR-6119-3p, miR-199b-5p, miR-1a-1-5p, miR-193b-3p, miR-708-3p, miR-542-3p, miR-1843b-5p, miR-7b-5p, miR-22-3p, miR-194-3p, miR-149-5p, miR-103a-3p, miR-487b-3p, miR-378a-5p, miR-193a-3p, miR-7-5p, miR-2285v, miR-365b-5p, let-7j, let-7a-2-3p, miR-628-5p, miR-345-5p, miR-543-3p, miR-1827, miR-129b-3p, miR-500a-3p, miR-411, miR-216b-5p, let-7i-5p, miR-504-5p, miR-2331-3p, miR-129-5p, miR-500, miR-4492, miR-2285j, let-7f, miR-665, miR-6525, miR-769-5p, miR-98-3p, miR-181c-5p, let-7b, miR-129-2-3p, miR-3074-5p, miR-3958-5p, miR-214, novel\_73, miR-33b-3p, miR-34a-5p, miR-2366, miR-1961, miR-98-3p, miR-217-5p, miR-328-3p, miR-106a, miR-98-5p, miR-3653-3p, miR-2484, let-7k, miR-26a-5p, miR-324-3p, miR-3601, miR-376a-5p, miR-143-3p, miR-504, miR-9-3p, miR-381-3p, miR-3596, miR-2483-3p, miR-139-5p, miR-2319b, miR-211-5p, miR-1843a-3p, miR-2440, miR-301a-5p, miR-877-3p, miR-361-3p, miR-1285-5p, miR-2447, miR-1388-5p, miR-362-3p, miR-329-3p, miR-301b-5p, miR-323b, miR-758-3p, miR-455-3p, miR-491-5p, miR-199b-5p, miR-214-3p, miR-103a-2-5p, miR-323b-3p, miR-505, miR-106b-5p, miR-182-5p, miR-1388-3p, miR-10b-3p, let-7g-3p, miR-7144-5p, miR-671-5p, miR-3154, miR-17-5p, miR-34c-5p, miR-365a-3p, miR-769, miR-324-5p, miR-199a-5p, miR-370-3p, miR-138-5p, miR-204-5p, miR-1-5p, miR-551b-3p, miR-331-3p, miR-26c, miR-135a-5p, miR-93, miR-365a-5p, miR-3607-3p, miR-6128, let-7d, miR-200b-3p, let-7a-2-3p, miR-3578, miR-218-2-

miR-200a, novel\_127, miR-152-3p, miR-322-5p, miR-505-5p, miR-1224-5p, miR-6517, miR-30c, miR-1290, miR-196a-5p, miR-16-5p, miR-494-5p, miR-300-3p, miR-2355-5p, miR-542-5p, miR-874-3p, miR-1248, miR-20b-5p, miR-876-3p, miR-93-5p, miR-301, miR-30e-5p, miR-432-3p, miR-432-3p, let-7f-2-3p, let-7f-2-3p, miR-380-5p, miR-193a-3p, miR-196b-5p, miR-483-3p, miR-378a-5p, novel\_51, miR-2411-3p, miR-146a, miR-411-5p, miR-194-3p, miR-3431, miR-134-3p, miR-497-5p, miR-16b, miR-22-3p, miR-199b-5p, miR-758-5p, miR-193b-3p, miR-421-5p, miR-379-3p, miR-576-3p, miR-669, miR-320c, novel\_69, miR-26b-5p, miR-216b-3p, novel\_68, miR-378f, miR-146b-5p, miR-2319a, miR-1306, miR-148a-3p, miR-421-5p, miR-422a, miR-345-3p, miR-324-3p, miR-26a-5p, miR-618, miR-210-5p, novel\_17, miR-30b, miR-328-3p, miR-7859, miR-380-5p, miR-106a, miR-18a-3p, miR-34a-5p, miR-142-3p, miR-217-5p, miR-378a-3p, miR-378i, miR-30c-5p, miR-6525, miR-214, miR-130b-5p, miR-874-5p, miR-500, miR-4492, miR-487b-5p, miR-451a, miR-151-3p, miR-15b-5p, miR-216b-5p, miR-2284s, miR-1277-3p, miR-548o-3p, miR-30c-1-3p, miR-186-5p, miR-1827, miR-433-3p, miR-30d-5p, miR-487b-5p, miR-500a-3p, miR-8485, miR-378d, miR-214-3p, miR-103a-2-5p, miR-146b, miR-153-3p, miR-199b-5p, miR-487b-5p, miR-1185-5p, miR-16b, miR-106b-5p, miR-2459, miR-1185-3p, miR-148b-5p, miR-455-3p, miR-153, miR-21b, miR-501-3p, miR-301b-5p, miR-2284r, miR-1285-5p, miR-877-3p, miR-361-3p, miR-3956-3p, miR-3964, miR-301a-5p, miR-2440, miR-218-5p, miR-1185-2-3p, miR-500-3p, miR-203-3p, miR-378g, miR-140-5p, miR-490-3p, miR-199a-5p, miR-380-5p, miR-181a-2-3p, miR-543-5p, miR-450a-2-3p, miR-2898, miR-17-3p, miR-217, miR-30c-2-3p, miR-582-3p, miR-378h, miR-483-3p, miR-411-3p, miR-501-3p, miR-30a-5p, miR-218-2-3p, miR-3578, miR-345-3p, miR-378c, miR-93, miR-409-3p, miR-135a-5p, miR-199a-5p, miR-34c-5p, miR-671-5p, miR-17-5p, miR-

miR-30b9-5p, miR-2447, miR-452-5p, miR-194b-5p, miR-877-3p, novel\_82, miR-628-3p, miR-374a-3p, miR-3964, miR-2284q, miR-2284g, miR-10b, miR-541-5p, miR-2483-3p, miR-3082-5p, miR-199b-5p, miR-129b-5p, miR-1983, miR-101b-3p, miR-23a-3p, miR-2284b, miR-30c-1-3p, miR-3187-3p, miR-2310, miR-199a-3p, miR-29b-1-5p, miR-199b-5p, miR-199b-3p, miR-1298-3p, miR-216a-3p, miR-2459, miR-10b, miR-299a-5p, miR-544a, miR-450b-5p, miR-16-2-3p, miR-101c, miR-4510, miR-3074-2-3p, miR-10b-5p, miR-19b-1-5p, miR-29b-2-5p, miR-450b-3p, miR-6516-3p, miR-30c-1-3p, miR-221-5p, miR-660-5p, miR-32-3p, miR-548o-3p, miR-3065-3p, miR-21-3p, miR-544-3p, miR-10a, miR-6130, miR-204-3p, miR-877-5p, miR-450a-1-3p, miR-411, miR-195a-3p, miR-421-5p, miR-29b-1-5p, miR-130a-5p, miR-376c-3p, miR-618, novel\_17, miR-92a-1-5p, miR-345-3p, miR-221-5p, miR-548e-3p, miR-7859, miR-23b-3p, miR-222-5p, miR-199a-3p, novel\_73, miR-19b-3p, miR-2284u, miR-135a-2-3p, miR-2285x, miR-2284w, miR-199b-5p, miR-6402, miR-133a-5p, miR-576-3p, miR-33a-3p, novel\_1, miR-199c, miR-147-5p, miR-10a-5p, miR-7-1-3p, miR-2404, miR-2387, miR-3065-5p, miR-3591-3p, miR-412-3p, miR-107, miR-19a-3p, miR-363-5p, miR-382, miR-101-5p, miR-628-5p, miR-432-3p, miR-2285r, miR-432-3p, miR-2411-3p, miR-194a, miR-660, miR-31-5p, miR-103a-3p, miR-26b-3p, miR-412-5p, miR-103, miR-544b, miR-2355-3p, miR-19b-2-5p, miR-653, miR-542-3p, miR-450c-3p, novel\_23, miR-194-5p, miR-3071-5p, miR-34c-3p, miR-592, miR-503-3p, miR-2355-5p, miR-2285aa, miR-141-3p, miR-331-5p, miR-199a-5p, miR-488-3p, miR-331-5p, miR-23b, miR-3154, miR-329b, miR-1814c, miR-3529-3p, miR-29b-2-5p, miR-2478, miR-450b-5p, miR-200a, miR-199a-5p, miR-2284y, miR-3065-3p, miR-2285b, miR-2284a, miR-30c-2-3p, miR-107, miR-200a-3p, miR-376a-5p, miR-450a-1-3p, miR-486-5p, novel\_121, miR-345-3p, miR-10a-5p

miR-34b, miR-411b-3p, miR-374c-3p, miR-299b-3p, miR-669, novel\_68, miR-216b-3p, miR-655-5p, miR-7-1-3p, miR-9851-3p, miR-195a-5p, miR-148a-3p, miR-18b, miR-2387, miR-1306, miR-3065-5p, miR-18a-3p, miR-3591-3p, miR-378b, miR-3959-3p, miR-449a, miR-326-3p, miR-2428, miR-199b-5p, novel\_120, miR-335-5p, miR-3957-3p, miR-17-3p, miR-206, miR-22-5p, miR-199c, miR-147-5p, miR-15a, miR-485-3p, miR-34c, miR-16a, miR-3535, miR-412-5p, miR-2285g, miR-503-5p, miR-134-3p, miR-194-3p, miR-149-5p, miR-31-5p, miR-30b-3p, miR-16b, miR-16-1-3p, miR-497-5p, miR-27b-3p, miR-188-5p, miR-1434-3p, miR-7b-5p, miR-374b-3p, miR-22841, miR-539-3p, miR-130b-5p, miR-124-5p, miR-1343-5p, miR-7-5p, miR-503-5p, miR-105-5p, novel\_51, miR-374c-3p, miR-34c-5p, miR-769, miR-199a-5p, miR-3957, miR-574-5p, miR-3957-5p, miR-874-3p, miR-2285aa, miR-10b-3p, miR-7144-5p, miR-23a-5p, miR-485-5p, miR-1814c, miR-331-5p, miR-3154, miR-18a, miR-374a-3p, miR-28a-3p, miR-3607-3p, miR-16-5p, miR-133a-3p, miR-331-5p, miR-486b-3p, miR-374b-3p, miR-134-5p, miR-410-5p, miR-135a-1-3p, miR-1306-3p, miR-331-3p, miR-100-3p, miR-322-5p, miR-1271-5p, miR-134-5p, miR-129-1-3p, miR-299a-3p, miR-423-3p, miR-412, miR-18b-5p, miR-615-3p, miR-134, miR-1343-5p, miR-330-5p, miR-148b-5p, miR-199a-5p, miR-2285b, miR-490-3p, miR-1, miR-2385-3p, miR-3064-5p, miR-4286, miR-28-3p, miR-17-3p, novel\_127, miR-152-3p, miR-378g, miR-3082-5p, miR-27a-3p, miR-3064-5p, miR-139-5p, miR-20a-3p, miR-7977, miR-96-5p, miR-299b-5p, miR-668-5p, miR-877-3p, miR-361-3p, miR-199b-5p, miR-1306-3p, miR-129b-5p, miR-361-3p, miR-3059-5p, miR-2447, miR-541-3p, miR-885-5p, miR-452-5p, miR-3968, miR-335, miR-2285t, miR-374a-3p, miR-2284q, novel\_82, miR-615, miR-769-5p, miR-371a-5p, miR-153, miR-216a-3p, miR-148b-5p, miR-455-3p, miR-2285e, miR-2459, novel\_78, miR-199b-3p, miR-27a-3p, miR-2426, miR-4510, miR-494-3p, miR-376b, miR-877-3p, miR-376a-5p, miR-99b-3p, miR-505, miR-664a-5p, miR-124-5p, miR-99a-3p, miR-487a-5p, miR-200a-3p, miR-139-5p, miR-99a-3p, miR-141-3p, miR-139-5p, miR-6130, miR-324-5p, miR-27b-5p, miR-320a, miR-10b-3p, miR-671-5p, miR-1827, miR-874-3p, miR-2331-3p, miR-370-3p, miR-21-3p, miR-151b, miR-29b-2-5p, miR-664a, miR-138-5p, miR-4492, miR-3432a, miR-3184-3p, miR-145a-3p, miR-214, miR-3074-2-3p, miR-1260b, miR-346, miR-338-3p, miR-145-3p, miR-2366, miR-2300b-3p, miR-140-3p, miR-5703, miR-2904, miR-4429, miR-493-3p, miR-378d, miR-6517, miR-18a-3p, miR-483-3p, miR-214-5p, miR-328-3p, miR-532-3p, miR-151-5p, miR-1260a, miR-320d, novel\_127, miR-2887, miR-29b-2-5p, miR-29b-1-5p, miR-3591-3p, miR-18a-3p, miR-147-3p, miR-1291, miR-6395, miR-4792, miR-378g, miR-320c, miR-4324, miR-128-1-5p, miR-194b-5p, miR-3957-3p, miR-361-3p, miR-2428, miR-1285, miR-194-5p, miR-197-3p, miR-1260b, miR-2426, miR-138, novel\_78, miR-1343-3p, novel\_4, miR-134-3p, miR-2459, miR-9788-3p, miR-320b, novel\_51, miR-194a, miR-2331-5p, miR-29b-1-5p, miR-483-3p, miR-214-3p, miR-494-3p, miR-432-3p, miR-432-3p, miR-8485

ALDOA ENSOARGO(aldolase)

TMEM135 ENSOARGO( transmem)

PMPCA ENSOARGO( peptidas)

|       |                   |                                                                                                                                                                                                                                                                                                                                                                                                                                                                                                                                                                                                                                                                                                                                                                                                                                                                                                                                                                                                                                                                                                                                                                                                                                                                                                                                                                                                                                                                                                                                                                                                                                                                                                                                                                                                                                                                                                                            |
|-------|-------------------|----------------------------------------------------------------------------------------------------------------------------------------------------------------------------------------------------------------------------------------------------------------------------------------------------------------------------------------------------------------------------------------------------------------------------------------------------------------------------------------------------------------------------------------------------------------------------------------------------------------------------------------------------------------------------------------------------------------------------------------------------------------------------------------------------------------------------------------------------------------------------------------------------------------------------------------------------------------------------------------------------------------------------------------------------------------------------------------------------------------------------------------------------------------------------------------------------------------------------------------------------------------------------------------------------------------------------------------------------------------------------------------------------------------------------------------------------------------------------------------------------------------------------------------------------------------------------------------------------------------------------------------------------------------------------------------------------------------------------------------------------------------------------------------------------------------------------------------------------------------------------------------------------------------------------|
|       |                   | miR-1388-3p, let-7a-5p, miR-2284b, miR-23a-3p, miR-3187-3p, miR-7-5p, miR-99a-5p, miR-2411-3p, miR-197-5p, miR-105-5p, let-7e, miR-133b-5p, miR-105-1, miR-26b-3p, let-7g-5p, miR-2284d, miR-148b-5p, miR-216a-3p, miR-7b-5p, miR-6529a, novel_23, miR-412-3p, miR-2284x, miR-135a-2-3p, miR-219a-5p, miR-24-3p, miR-142b, miR-208a-3p, let-7i, miR-22-5p, miR-2319b, miR-2284g, novel_68, miR-320b, miR-670-3p, let-7d-5p, miR-216a-3p, miR-99b-5p, miR-96-5p, let-7e-5p, miR-376a-2-5p, miR-2319a, miR-2385-3p, miR-2284y, let-7g, miR-210-5p, miR-99a, miR-208b-3p, miR-6119-5p, miR-2285af, let-7c-5p, miR-345-3p, miR-98-5p, let-7f-5p, miR-2898, miR-543-5p, let-7k, miR-548e-3p, miR-376a-5p, miR-412, miR-1271-5p, miR-23c, miR-383-5p, miR-23b-3p, miR-3578, miR-1961, miR-345-3p, miR-1197-5p, let-7d, miR-378d, miR-2284u, miR-148a-5p, miR-155-5p, miR-105-2, miR-128-3p, miR-99a-5p, miR-4510, let-7b, miR-1271, let-7b-5p, let-7f, miR-324-3p, miR-155-5p, miR-6130, miR-155-5p, let-7i-5p, miR-100-5p, miR-23b, miR-329b, miR-625-5p                                                                                                                                                                                                                                                                                                                                                                                                                                                                                                                                                                                                                                                                                                                                                                                                                                                                        |
| SWT1  | ENSOARGO(SWT1 RNA | miR-211, miR-183-5p, miR-211-5p, miR-329b, miR-9851-3p, miR-208b-5p, miR-1343-5p, miR-204-5p, novel_99, miR-1343-5p, miR-1434-5p                                                                                                                                                                                                                                                                                                                                                                                                                                                                                                                                                                                                                                                                                                                                                                                                                                                                                                                                                                                                                                                                                                                                                                                                                                                                                                                                                                                                                                                                                                                                                                                                                                                                                                                                                                                           |
| NGLY1 | ENSOARGO(N-glycan | miR-224-5p, novel_44, miR-346, miR-433-5p, let-7b, miR-129-2-3p, miR-3184-3p, novel_74, miR-874-5p, miR-454-3p, let-7f, miR-665, miR-664a-5p, miR-3604, miR-582-5p, miR-301a-3p, let-7i-5p, miR-151b, miR-15b-5p, miR-2331-3p, miR-30c-1-3p, miR-1277-3p, miR-548o-3p, miR-296-3p, miR-552-3p, miR-1895, miR-885-3p, miR-543-3p, miR-625-5p, miR-186-5p, miR-411, miR-433-3p, miR-30d-5p, miR-376a-5p, miR-181b-1-3p, miR-143-3p, miR-503-5p, miR-345-3p, miR-98-5p, miR-2484, let-7k, miR-30b, miR-324-3p, miR-500a-5p, miR-422a, miR-7859, miR-328-3p, miR-380-5p, miR-142-3p, miR-133a-3p, miR-218-1-3p, miR-2284u, miR-378i, miR-30c-5p, miR-1961, miR-193b-5p, miR-217-5p, miR-378a-3p, miR-877-3p, novel_82, miR-615, miR-101-3p, miR-500-3p, miR-4443, miR-2284g, miR-211-5p, miR-136-5p, miR-1983, miR-378j, miR-378d, miR-8485, miR-1388-3p, miR-124a, miR-101b-3p, miR-491-5p, miR-130b-3p, miR-153-3p, miR-199b-5p, miR-505, miR-323b-3p, miR-153, miR-2459, miR-199b-3p, miR-1343-3p, miR-101c, miR-541, miR-323b, miR-501-3p, miR-1260b, let-7e-3p, miR-16-5p, miR-3432a, miR-6740-5p, miR-125b-5p, miR-300-3p, miR-542-5p, miR-1271, miR-125a, miR-767, miR-329b, miR-1248, miR-30e-5p, miR-450b-5p, let-7g, miR-2284y, miR-192-3p, miR-3064-5p, miR-127-5p, let-7f-5p, novel_96, miR-200a-3p, miR-152-3p, miR-30f, miR-322-5p, miR-2284z, novel_121, miR-129-1-3p, miR-2285ad, miR-429-3p, miR-18b-5p, miR-885-3p, miR-30c, miR-1290, miR-1343-5p, miR-330-5p, miR-23b-5p, miR-374c-5p, miR-2284w, miR-199b-5p, miR-301b-3p, miR-376a-3p, miR-193b-3p, miR-29c-3p, miR-758-5p, miR-29a, miR-421-5p, miR-28c, novel_87, miR-374c-3p, miR-6535, miR-677, miR-181b-3p, miR-3120-3p, miR-412-3p, miR-378f, let-7e-5p, miR-148a-3p, miR-150-5p, miR-216a-3p, miR-2284l, miR-668-3p, let-7f-2-3p, let-7f-2-3p, miR-193a-3p, novel_51, miR-194a, miR-412-5p, miR-3535, miR-111-5p, miR-104-3p, miR-31-5p, miR-107- |
| FZD4  | ENSOARGO(frizzled |                                                                                                                                                                                                                                                                                                                                                                                                                                                                                                                                                                                                                                                                                                                                                                                                                                                                                                                                                                                                                                                                                                                                                                                                                                                                                                                                                                                                                                                                                                                                                                                                                                                                                                                                                                                                                                                                                                                            |

OTUB1 ENSOARGO(OTU deub miR-885-3p, let-7d, miR-1343-5p, miR-29d-3p, miR-196a-5p, miR-505-5p, novel\_79, miR-2285ad, novel\_127, miR-17-3p, let-7f-5p, miR-339a, let-7c-5p, miR-125a-3p, miR-2397-5p, miR-3065-3p, let-7g, novel\_39, miR-28b, miR-3064-5p, miR-4286, miR-7144-5p, miR-485-5p, miR-671-5p, miR-876-3p, miR-329b, miR-3154, miR-488-3p, miR-2355-5p, miR-125a, miR-574-5p, miR-874-3p, miR-486b-3p, miR-331-3p, miR-125b-5p, miR-6740-5p, miR-29b-3p, miR-2433, miR-1306-5p, miR-26a-2-3p, miR-455-5p, miR-744-5p, miR-30b-3p, miR-29b, miR-197-3p, miR-1843b-5p, miR-194-3p, miR-503-5p, let-7g-5p, miR-339-5p, miR-377-5p, miR-1343-5p, miR-125a-5p, miR-196b-5p, miR-330-3p, miR-455-5p, miR-503-5p, miR-432-3p, miR-363-5p, miR-628-5p, miR-6240, miR-6395, let-7e-5p, miR-1291, miR-150-5p, miR-1306, miR-18a-3p, miR-6535, miR-29a-3p, miR-128-1-5p, miR-29a, let-7i, miR-4324, miR-133a-5p, miR-28c, miR-2428, miR-24-3p, miR-3957-3p, miR-29c-3p, miR-758-5p, miR-17-3p, miR-133a-3p, miR-19b-3p, miR-2904, miR-5703, miR-1961, novel\_83, miR-328-3p, miR-380-5p, miR-3960, miR-18a-3p, miR-21-3p, let-7k, miR-98-5p, miR-324-3p, miR-185-3p, miR-125b, miR-2285p, miR-210-5p, miR-486-3p, miR-377-5p, miR-130a-5p, miR-503-5p, miR-885-3p, miR-1827, miR-339b, novel\_32, let-7i-5p, miR-499b-3p, miR-6130, miR-3065-3p, miR-552-3p, miR-548o-3p, miR-4492, miR-17-3p, miR-664a, miR-665, let-7f, let-7b-5p, miR-122-5p, miR-3184-5p, miR-6134, miR-214, let-7b, miR-145a-3p, miR-3184-3p, miR-4510, miR-30b-3p, miR-296-5p, miR-484, miR-301b-5p, miR-541, miR-147a, miR-5010-3p, miR-330-3p, novel\_78, novel\_4, miR-1343-3p, miR-214-3p, let-7e, miR-3085-3p, miR-25-5p, miR-487b-5p, miR-1306-5p, miR-5126, let-7a-5p, miR-877-3p, miR-361-3p, let-7d-5p, miR-499a-3p, miR-2483-3p, miR-7977, miR-3064-5p, miR-301a-5p, miR-423-5p, novel\_60, miR-3956-3p, miR-541-3p

miR-639b, miR-195a-5p, miR-135b-5p, miR-6516-3p, miR-107, miR-1291, miR-378b, miR-2285ab, miR-34b, miR-2404, miR-7-1-3p, miR-378b, miR-199c, miR-203b-5p, miR-92a-3p, let-7i, miR-382-5p, miR-34c, miR-16a, miR-15a, miR-449a, miR-323c, miR-3959-3p, novel\_101, miR-495-3p, miR-17-3p, miR-219a-1-3p, miR-145a-5p, miR-1434-3p, miR-544b, miR-103, let-7g-5p, miR-133b-5p, miR-466f-3p, miR-125a-5p, miR-124-5p, miR-330-3p, miR-224-5p, miR-539-3p, miR-654-3p, miR-382, miR-101-5p, miR-130b-5p, miR-7144-5p, miR-320a, miR-362-5p, miR-199a-5p, miR-769, miR-34c-5p, miR-141-3p, miR-487a-3p, miR-374b-3p, miR-486b-3p, miR-135a-5p, miR-26c, miR-5100, miR-2332, miR-1-5p, miR-378c, miR-374a-3p, miR-323-3p, miR-500b-5p, miR-3607-3p, let-7d, miR-582-3p, miR-545-5p, miR-378h, miR-2411-5p, miR-24-2-5p, miR-7641, miR-92a-3p, miR-107, miR-17-3p, miR-2898, let-7c-5p, miR-217, miR-490-3p, miR-199a-5p, miR-ELK4 ENSOARGO(ELK4, ET:1957a, novel\_94, miR-129b-5p, miR-199b-5p, miR-361-3p, let-7d-5p, miR-378e, miR-7977, miR-541-5p, miR-3064-5p, miR-2284q, miR-374a-3p, miR-2285t, miR-769-5p, miR-8095, miR-362-5p, miR-452-5p, miR-2285f, miR-212-3p, miR-2284aa, miR-2426, miR-544a, miR-378c, miR-125b-2-3p, miR-484, miR-378b, miR-6529a, miR-500-5p, miR-2300a-5p, let-7e, miR-3085-3p, miR-362-3p, miR-1306-5p, novel\_103, miR-320b, miR-491-3p, miR-193a, miR-3187-3p, miR-1839-3p, miR-424-5p, let-7a-5p, miR-154b-3p, miR-2312, miR-21a-3p, miR-204-3p, miR-6130, miR-544-3p, miR-27a-5p, miR-21-3p, miR-221-5p, miR-545-3p, miR-378a-3p, miR-424-5p, miR-6516-3p, miR-17-3p, miR-338-5p, miR-655-3p, miR-324-3p, miR-338-3p, miR-6134, let-7b-5p, miR-2330-3p, miR-3074-2-3p, miR-4510, miR-378c, miR-539-5p, miR-378d, miR-4429, miR-140-3p, miR-362-3p, miR-15a-5p, miR-148b-3p, miR-487a-3p, miR-383-5p, miR-485-3p, miR-21-3p, miR-200-3p, miR-34b-5p, miR-221-5p, miR-466i-5p, miR-



miR-200-3p, miR-200c, miR-221-3p, miR-1001-3p, miR-100-3p, miR-125b, miR-542-5p, miR-30b, miR-486-3p, miR-329a-5p, miR-218-1-3p, miR-30c-5p, novel\_133, miR-1247-5p, miR-616-3p, miR-199a-3p, miR-210-3p, miR-30d-3p, miR-3600, miR-18a-3p, miR-874-5p, miR-190a-5p, miR-29b-2-5p, miR-30a-3p, miR-30e-3p, miR-6134, miR-214, miR-3184-3p, miR-30f, miR-339b, miR-345-5p, miR-30d-5p, miR-129b-3p, miR-2285c, novel\_32, miR-193b-3p, miR-323-5p, miR-544-3p, miR-216b-3p, miR-30c-1-3p, miR-504-5p, miR-221-5p, miR-542-5p, miR-214-3p, miR-199b-5p, miR-3955-3p, miR-491-5p, novel\_124, miR-3085-3p, miR-2957, miR-326, miR-199a-3p, miR-2310, miR-4532, miR-30c-1-3p, miR-1388-3p, miR-3120-5p, miR-2426, miR-544a, miR-1388-5p, miR-484, miR-2285e, miR-2459, miR-147a, miR-145b, miR-1343-3p, miR-2285y, miR-30b-5p, novel\_111, miR-877-3p, miR-190b-5p, miR-6527, miR-3956-3p, miR-3059-5p, novel\_60, miR-1983, miR-504, miR-3963, miR-378j, miR-199b-5p, miR-3082-5p, miR-2483-3p, miR-378g, miR-7977, miR-7689-3p, miR-3064-5p, novel\_127, novel\_96, miR-200a-3p, miR-127-5p, miR-339a, miR-30f, miR-30c-2-3p, miR-1260a, miR-29a-5p, miR-199a-5p, miR-4286, miR-30a-3p, miR-3064-5p, miR-29b-2-5p, miR-30c, miR-30a-5p, miR-330-5p, miR-1343-5p, miR-1290, miR-134, miR-134-5p, novel\_79, miR-299a-3p, miR-2285ad, miR-592, miR-134-5p, miR-486b-3p, miR-410-3p, miR-138-5p, miR-125b-5p, miR-410-5p, miR-1260b, miR-3607-3p, miR-6128, miR-1814c, miR-1248, miR-7144-5p, miR-23a-5p, miR-345-5p, miR-329b, miR-876-3p, miR-3154, miR-30e-5p, miR-488-3p, miR-154b-5p, miR-133c, miR-199a-5p, miR-374c-3p, miR-141-3p, miR-125a, miR-2285aa, miR-2355-5p, miR-874-3p, miR-574-5p, miR-193a-3p, miR-1343-5p, miR-125a-5p, miR-455-5p, miR-190a, miR-345-5p, miR-628-5p, miR-455-5p, miR-4508, miR-1260b, miR-138, miR-145a-5p, miR-3071-5p, miR-1285, miR-542-3p, miR-novel\_42, miR-214, miR-3184-5p, miR-2285j, miR-29b-3p, miR-6740-5p, miR-450b-3p, miR-138-5p, miR-221-5p, miR-504-5p, miR-30c-1-3p, miR-3065-3p, miR-450a-1-3p, miR-3154, miR-671-5p, miR-3064-5p, miR-181b-1-3p, miR-3065-3p, miR-2432, miR-490-3p, novel\_17, miR-30c-2-3p, miR-92a-1-5p, miR-760-3p, miR-466i-5p, miR-30b-3p, miR-221-5p, miR-412, miR-210-3p, miR-450a-1-3p, miR-1247-5p, miR-29d-3p, miR-124-3p, miR-135a-2-3p, miR-3957-3p, miR-29c-3p, miR-423-5p, miR-2284w, miR-371a-5p, miR-128-1-5p, miR-4726-5p, miR-29a, miR-502b, miR-3064-5p, miR-7689-3p, miR-29a-3p, miR-677, miR-181b-3p, miR-361-3p, miR-1306, miR-1291, miR-504, miR-124a, miR-6240, miR-30c-1-3p, miR-4532, miR-758-3p, miR-7-5p, miR-1306-5p, miR-330-3p, novel\_51, miR-3085-3p, miR-214-3p, miR-340-3p, miR-2300a-5p, novel\_78, novel\_4, miR-330-3p, miR-5010-3p, miR-181b-2-3p, miR-185-5p, miR-873a-5p, miR-7b-5p, miR-412-3p, miR-450c-3p, miR-758-3p, miR-29b, miR-138, miR-4508

WDR86 ENSOARGOC WD repea

MYO3A ENSOARGOC myosin I

miR-78b9, miR-23b-3p, miR-23c, miR-2284h-5p, miR-328-3p, miR-212-5p, miR-33b-3p, miR-361-5p, miR-34a-5p, miR-98-3p, miR-664b-3p, miR-376a-5p, miR-421-5p, miR-377-5p, miR-142a-3p, miR-143-3p, miR-2285w, miR-345-3p, miR-3653-3p, miR-26a-5p, miR-618, miR-3601, miR-324-3p, miR-92a-1-5p, miR-345-3p, miR-499b-3p, miR-151b, miR-15b-5p, miR-30c-1-3p, miR-32-5p, miR-216b-3p, miR-296-3p, miR-552-3p, miR-345-5p, miR-625-5p, miR-1895, miR-186-5p, miR-500a-3p, miR-30d-5p, miR-6525, miR-98-3p, miR-665-5p, miR-214, miR-129-5p, miR-500, miR-4492, miR-130b-5p, miR-2285j, miR-3604, miR-153, miR-1298-3p, miR-2459, miR-199b-3p, novel\_78, miR-330-3p, miR-145b, miR-541, miR-1a-3p, miR-8485, miR-1388-3p, miR-23a-3p, miR-744-3p, miR-491-5p, miR-199b-5p, miR-146b, miR-153-3p, miR-214-3p, miR-431-5p, miR-505, miR-16b, miR-182-5p, miR-25, miR-499a-3p, miR-378g, miR-3596, miR-2483-3p, miR-203-3p, miR-4443, miR-139-5p, miR-2319b, miR-2285u, miR-126b-5p, miR-211-5p, miR-99b-5p, miR-335-3p, miR-9-3p, miR-221, miR-2447, miR-885-5p, miR-3956-3p, miR-499a-5p, novel\_82, miR-615, miR-322-5p, miR-134-5p, novel\_121, miR-299a-3p, miR-2285ad, miR-1224-5p, miR-412, miR-431, miR-1290, miR-2427, miR-1343-5p, miR-92b-3p, miR-29a-5p, miR-200a, novel\_39, miR-450c-5p, miR-3956-5p, miR-127-5p, miR-200a-3p, novel\_96, miR-125a-3p, miR-25-3p, miR-3068-3p, miR-2285aa, miR-2355-5p, miR-876-3p, miR-345-5p, miR-30e-5p, miR-23b, miR-1197-3p, miR-1260b, miR-193a-5p, miR-16-5p, miR-134-5p, miR-2433, miR-134-3p, miR-194-3p, miR-31-5p, miR-16b, miR-497-5p, miR-27b-3p, miR-19b-2-5p, miR-542-3p, miR-223-3p, miR-432-3p, miR-2284l, miR-6240, miR-378a-5p, miR-146a, miR-105-5p, miR-32, novel\_51, miR-2411-3p, miR-299b-3p, miR-320c, miR-3120-3p, miR-26b-5p, miR-146b-5p, miR-3591-3p, miR-199b-5p, miR-1839-3p, miR-6119-3p, miR-206, miR-421-5p, miR-142b, miR-576-3p, novel\_87, miR-

miR-378h, miR-545-5p, novel\_121, miR-299a-3p, miR-376a-5p, miR-105-2, miR-128-3p, miR-3591-5p, miR-345-3p, miR-218-2-3p, miR-330-5p, miR-92b-3p, miR-3064-5p, miR-127-5p, miR-6536, miR-92a-3p, miR-200a-3p, miR-152-3p, miR-125a-3p, miR-25-3p, miR-574-5p, miR-141-3p, miR-1271, miR-329b, miR-671-5p, miR-30e-5p, miR-374a-3p, miR-378c, miR-374b-3p, miR-5100, miR-6740-5p, miR-130a-3p, miR-219a-1-3p, miR-16-1-3p, miR-188-5p, miR-27b-3p, miR-1843b-5p, miR-1285, miR-2113, novel\_23, miR-130b-5p, miR-363-5p, miR-124-5p, miR-146a, miR-32, miR-105-5p, miR-2411-3p, miR-299b-3p, miR-670-3p, miR-144-3p, miR-669, miR-3074-5p, miR-26b-5p, miR-19a-3p, miR-146b-5p, miR-378f, miR-148a-3p, miR-3591-3p, miR-216a-3p, miR-211, novel\_27, miR-326-3p, miR-301b-3p, miR-2285x, novel\_101, miR-92a-3p, novel\_1, miR-6123, miR-576-3p, miR-148b-3p, miR-3600, miR-19b-3p, miR-218-1-3p, miR-16-1-3p, miR-148a-5p, miR-378i, miR-376a-5p, miR-378a-3p, miR-130a-5p, miR-146a-5p, miR-195a-3p, miR-30d, miR-2484, miR-299-3p, miR-196a-3p, miR-26a-5p, miR-422a, miR-345-3p, miR-301a-3p, miR-544-3p, miR-378a-3p, miR-32-5p, miR-21-3p, miR-552-3p, let-7g-3p, miR-30f, let-7f-1-3p, miR-500a-3p, miR-30d-5p, miR-122-5p, miR-6134, miR-378c, miR-3074-5p, miR-665-5p, miR-6516-3p, miR-500, miR-454-3p, miR-130b-5p, let-7b-3p, miR-324-3p, miR-665, miR-148b-5p, miR-105-1, miR-27a-3p, miR-378c, miR-544a, miR-6529a, miR-378b, miR-323b, miR-125b-2-3p, miR-378d, miR-8485, let-7c-3p, miR-3085-3p, miR-130b-3p, miR-146b, miR-326, miR-2957, miR-505, miR-323b-3p, miR-378e, miR-2483-3p, miR-27a-3p, miR-3064-5p, miR-126b-5p, miR-211-5p, miR-7977, miR-7705, miR-4454, miR-363-3p, miR-628-3p, miR-374a-3p, miR-2284q

CCDC6 ENSOARGO(coiled-coil) 3p, miR-146a, miR-5703, miR-133b-3p, miR-146b-5p, miR-146b, miR-133a-3p, miR-541-3p, miR-1388-3p, miR-133a-3p, miR-2355-5p, miR-6134, miR-146a-5p

PML ENSOARGO(promyelocytic) 5p, miR-485-5p, miR-378f, miR-1827, miR-34a-5p, miR-378c, miR-378a-3p, miR-378i, miR-361-3p, miR-378b, miR-378e, miR-34c-5p, miR-34b, miR-503-5p, miR-378h, miR-31-5p, miR-378a-3p, miR-874-5p, miR-34b-5p, miR-34c, miR-422a, miR-665, miR-503-5p, miR-378c, miR-449a, miR-1271-3p, miR-378d, miR-378c, miR-503-5p

SLC45A3 ENSOARGO(solute carrier) 5p, miR-485-5p, miR-378f, miR-1827, miR-34a-5p, miR-378c, miR-378a-3p, miR-378i, miR-361-3p, miR-378b, miR-378e, miR-34c-5p, miR-34b, miR-503-5p, miR-378h, miR-31-5p, miR-378a-3p, miR-874-5p, miR-34b-5p, miR-34c, miR-422a, miR-665, miR-503-5p, miR-378c, miR-449a, miR-1271-3p, miR-378d, miR-378c, miR-503-5p

miR-450b-5p, miR-2426, miR-362-3p, miR-329-3p, miR-125b-2-3p, miR-3962, miR-421, miR-500-5p, miR-105-1, miR-199b-3p, miR-1343-3p, miR-548w, miR-222-5p, miR-145b, miR-27a-3p, miR-130b-3p, miR-491-5p, miR-214-3p, miR-362-3p, miR-2310, miR-491-3p, miR-382-3p, miR-376b, miR-23a-3p, miR-136-5p, miR-668-5p, miR-96-5p, miR-544-5p, miR-381-3p, miR-378j, miR-27a-3p, miR-203-3p, miR-10b, miR-20a-3p, miR-2319b, miR-139-5p, miR-664b, miR-24-1-5p, miR-211-5p, miR-541-5p, miR-374b-5p, miR-2285u, miR-335, miR-30b-5p, miR-2285n, miR-371a-5p, miR-2285y, miR-362-5p, miR-8095, miR-181d-5p, miR-9-5p, miR-2285f, miR-19b-3p, miR-362-3p, miR-30c-5p, miR-5703, miR-23c, miR-222-5p, miR-148b-3p, miR-487a-3p, miR-23b-3p, miR-30d-3p, miR-30d, miR-3653-3p, novel\_17, miR-374a-5p, miR-2285p, miR-30b, miR-185-3p, miR-500a-5p, miR-216a-5p, miR-376c-3p, miR-377-5p, miR-421-5p, miR-380-3p, miR-486-3p, miR-345-3p, miR-30f, miR-2312, miR-582-5p, novel\_99, miR-186-5p, miR-543-3p, miR-21a-3p, miR-30d-5p, miR-656-3p, miR-139-5p, miR-377-3p, miR-376e-3p, miR-301a-3p, miR-140-5p, miR-32-5p, miR-21-3p, miR-155-5p, miR-487b-5p, miR-130b-5p, miR-487a-5p, miR-454-3p, miR-30e-3p, miR-29b-2-5p, miR-19b-1-5p, miR-30a-3p, miR-6525, miR-181c-5p, miR-145a-3p, miR-214, miR-1271, miR-1260b, miR-138, miR-380-3p, miR-2284ab, miR-27b-3p, miR-181a-5p, miR-708-3p, miR-19b-2-5p, novel\_23, miR-145a-5p, miR-185-5p, miR-544b, miR-377-5p, miR-130a-3p, miR-466f-3p, miR-377-3p, miR-32, miR-105-5p, miR-654-3p, let-7j, miR-130b-5p, let-7f-2-3p, let-7f-2-3p, miR-19a-3p, miR-2319a, miR-148a-3p, miR-2285ab, miR-150-5p, miR-3120-3p, novel\_1, miR-92a-3p, miR-199c, miR-33a-3p, miR-211, miR-301b-3p, miR-335-5p, miR-2285x, miR-582-3p, miR-105-2, miR-30c, miR-134, miR-30a-5p, miR-23b-5p, miR-2427, miR-1271-5p, miR-24-2-5p, miR-9-5p, novel\_121, miR-134-5p, miR-545-

miR-154b-5p, miR-3959-5p, miR-1271, miR-376c-5p, miR-671-5p, miR-876-3p, miR-376c-5p, miR-3154, miR-301, miR-2448-3p, miR-378c, novel\_63, miR-450a-1-3p, novel\_121, miR-129-1-3p, miR-378h, miR-412, miR-299a-3p, miR-10a-5p, miR-1343-5p, miR-3578, miR-2284y, miR-1271-3p, miR-2284a, miR-380-5p, miR-4286, miR-181a-2-3p, novel\_96, miR-2898, miR-6536, miR-30c-2-3p, miR-217, miR-205-5p, miR-6535, miR-669, miR-299b-3p, miR-7-1-3p, miR-10a-5p, miR-378f, miR-450b-3p, miR-19a-3p, miR-376b-5p, miR-2284w, miR-24-3p, novel\_101, miR-342-3p, miR-147-5p, miR-6123, novel\_1, miR-3431, miR-185-5p, miR-26b-3p, miR-31-5p, miR-30b-3p, miR-450c-3p, miR-197-3p, miR-653, miR-1434-3p, miR-2483-5p, miR-101-5p, miR-380-5p, miR-493-5p, miR-106b-3p, miR-1343-5p, miR-224-5p, miR-877-5p, miR-10a, miR-216b-5p, miR-532-5p, miR-182-5p, miR-378a-3p, miR-2331-3p, miR-30c-1-3p, miR-625-5p, miR-186-5p, let-7g-3p, miR-129b-3p, miR-450a-1-3p, miR-10b-5p, miR-6525, miR-224-5p, miR-214, miR-378c, miR-3184-3p, miR-129-2-3p, miR-450b-3p, miR-665, miR-2285j, miR-671-3p, miR-532-3p, miR-7859, miR-548e-3p, miR-218-1-3p, miR-378d, miR-2284u, miR-19b-3p, miR-5703, miR-188-3p, miR-217-5p, miR-378a-3p, miR-378i, novel\_133, miR-1246, miR-299-3p, miR-422a, novel\_17, miR-7857-3p, miR-378e, miR-3596, miR-489, miR-10b, miR-493-5p, miR-361-3p, miR-361-3p, miR-877-3p, miR-6527, miR-2285t, miR-3958-3p, miR-301a-5p, miR-2285n, miR-455-3p, miR-9788-3p, miR-421, novel\_4, miR-409b, miR-21b, miR-16-2-3p, miR-378c, miR-450b-5p, miR-412-3p, miR-125b-2-3p, miR-30b-3p, miR-6529a, miR-378b, miR-10b, miR-301b-5p, miR-8485, miR-491-3p, miR-30c-1-3p, miR-378d, miR-2284b, miR-214-3p, miR-491-5p, miR-182-5p, miR-342

miR-2319b, miR-211-5p, miR-504, novel\_94, miR-361-3p, miR-423-5p, miR-2447, miR-3059-5p, miR-9-5p, miR-2284q, miR-382-3p, miR-371a-5p, miR-301a-5p, miR-539-5p, miR-1298-3p, miR-455-3p, miR-1343-3p, novel\_4, miR-450b-5p, miR-101c, miR-484, miR-301b-5p, miR-7857, miR-30c-1-3p, miR-193a, miR-1388-3p, novel\_124, miR-5126, miR-326, miR-29b-1-5p, miR-2284s, miR-27a-5p, miR-6516, miR-22-3p, miR-204-3p, miR-30c-1-3p, miR-504-5p, miR-221-5p, miR-21-3p, miR-296-3p, miR-345-5p, miR-339b, miR-885-3p, miR-1895, miR-625-5p, miR-1827, miR-6525, miR-3184-5p, miR-3074-5p, miR-3958-5p, miR-3074-2-3p, miR-664a, miR-17-3p, miR-874-5p, miR-4492, miR-130b-5p, miR-15b-3p, miR-30e-3p, miR-30a-3p, miR-19b-1-5p, miR-2284h-5p, miR-328-3p, miR-18a-3p, miR-3600, miR-16-1-3p, miR-2366, miR-2408, miR-2904, miR-5703, miR-140-3p, miR-29b-1-5p, miR-130a-5p, miR-2285w, miR-345-3p, miR-466i-5p, miR-30b-3p, miR-221-5p, miR-299-3p, miR-185-3p, miR-125b, miR-299b-3p, miR-3074-5p, miR-410-5p, miR-135b-5p, miR-6395, miR-3970, miR-18a-3p, miR-3591-3p, miR-211, miR-371b-3p, miR-326-3p, miR-2284w, miR-2428, miR-219b-3p, miR-17-3p, miR-147-5p, miR-4324, miR-502-5p, miR-185-5p, miR-194-3p, miR-339-5p, miR-16-1-3p, miR-4508, miR-744-5p, miR-19b-2-5p, miR-1434-3p, miR-7b-5p, miR-22-3p, miR-296-3p, miR-345-5p, miR-130b-5p, miR-452-5p, miR-1343-5p, miR-125a-5p, miR-7-5p, miR-296-3p, miR-365b-5p, novel\_51, miR-374c-3p, miR-874-3p, miR-2355-5p, miR-125a, miR-345-5p, miR-7144-5p, miR-671-5p, miR-485-5p, miR-1197-3p, miR-365a-5p, miR-134-5p, miR-204-5p, miR-125b-5p, miR-135a-5p, miR-9-5p, miR-6516-5p, miR-134-5p, miR-582-3p, miR-299a-3p, miR-6517, novel\_79, miR-885-3p, miR-134, miR-1343-5p, miR-330-5p, miR-148b-5p, miR-1271-3p, miR-2385-3p, miR-30a-3p, miR-17-3p, novel\_127, miR-543-5p, miR-30c-2-3p, miR-339a

miR-193a-5p, miR-6128, miR-133a-3p, miR-145-3p, miR-1260b, miR-331-3p, miR-6740-5p, miR-125b-5p, miR-409-3p, miR-29b-3p, miR-28-5p, novel\_9, miR-370-3p, miR-2355-5p, miR-125a, miR-141-3p, miR-615-5p, miR-487a-3p, miR-874-3p, miR-34c-5p, miR-18a, miR-381-3p, miR-7144-5p, miR-485-5p, miR-1814c, miR-329a, miR-345-5p, miR-329b, miR-3064-5p, miR-29b-2-5p, miR-4286, miR-181a-2-3p, miR-3065-3p, miR-376c-5p, miR-376b-5p, miR-1271-3p, miR-28b, miR-1260a, miR-125a-3p, miR-664-3p, miR-450a-2-3p, miR-17-3p, miR-2898, miR-1224-5p, miR-7641, miR-18b-5p, miR-2285ad, miR-299a-3p, miR-545-5p, miR-486-5p, miR-129-1-3p, miR-505-5p, miR-9-5p, miR-483-3p, miR-6516-5p, miR-1343-5p, miR-29d-3p, miR-1290, miR-128-3p, miR-300, miR-29c-3p, miR-17-3p, miR-2285x, novel\_120, miR-449a, miR-2284w, miR-2428, miR-24-3p, miR-34c, miR-33a-3p, miR-502-5p, miR-4324, miR-28c, miR-421-5p, miR-22-5p, miR-656-5p, miR-29a, miR-3120-3p, miR-3074-5p, miR-329-5p, miR-216b-3p, miR-146b-3p, miR-299b-3p, miR-374c-3p, miR-34b, miR-29a-3p, miR-216a-3p, miR-18b, miR-6395, miR-1291, miR-412-3p, miR-628-5p, miR-539-3p, miR-345-5p, miR-197-5p, novel\_51, miR-224-5p, miR-1343-5p, miR-125a-5p, miR-483-3p, miR-187-3p, miR-340-3p, miR-31-5p, miR-133b-5p, miR-194-3p, miR-149-5p, miR-432-5p, miR-3535, miR-134-3p, miR-185-5p, miR-3431, miR-432, miR-1843b-5p, miR-7862, miR-29b, miR-30b-3p, miR-219a-1-3p, miR-1260b, miR-2330-3p, miR-129-2-3p, miR-3074-5p, miR-4510, miR-6525, miR-224-5p, miR-346, miR-324-3p, miR-151-3p, miR-665, miR-29b-2-5p, miR-500, miR-708-5p, miR-4492, novel\_74, miR-17-3p, miR-664a, miR-154a-3p, miR-216b-3p, miR-3065-3p, miR-552-3p, miR-182-5p, miR-532-5p, miR-221-5p, miR-2331-3p, novel\_25, miR-877-5p, miR-6516, miR-216b-5p, miR-6130, miR-129b-3p, miR-500a-3p, miR-1895, miR-1827, miR-133b-3p, miR-345-5p, miR-154b-3p, miR-18a-5p, miR-

miR-383-5p, miR-222-5p, novel\_83, miR-671-3p, miR-199a-3p, miR-1b-3p, novel\_133, miR-362-3p, miR-2904, miR-188-3p, miR-29b-1-5p, miR-130a-5p, miR-146a-5p, miR-760-3p, miR-30d, miR-30b-3p, miR-34b-5p, miR-221-5p, miR-21-3p, miR-542-5p, miR-125b, miR-185-3p, miR-544-3p, miR-6516, miR-193b-3p, miR-6130, novel\_32, miR-140-5p, miR-221-5p, miR-370-5p, let-7g-3p, miR-30f, miR-18a-5p, novel\_99, let-7b-5p, miR-6134, miR-4510, miR-145a-3p, miR-3074-2-3p, miR-17-3p, miR-708-5p, miR-208b-5p, miR-324-3p, miR-216a-3p, novel\_4, miR-5010-3p, miR-299a-5p, miR-544a, miR-101a-5p, miR-2426, miR-484, miR-125b-2-3p, miR-30b-3p, miR-30c-1-3p, miR-4532, miR-758-3p, let-7a-5p, miR-382-3p, miR-33a-5p, novel\_124, miR-3085-3p, miR-25-5p, miR-3955-3p, miR-542-5p, let-7e, miR-342, novel\_103, miR-362-3p, miR-489, let-7d-5p, miR-3064-5p, miR-20a-3p, novel\_60, miR-541-3p, miR-452-5p, miR-30b-5p, miR-371a-5p, miR-6516-5p, miR-483-3p, miR-545-5p, miR-423-3p, let-7d, miR-615-3p, miR-134, miR-30a-5p, miR-4286, miR-181a-2-3p, miR-17-3p, miR-2898, miR-191-3p, miR-107, miR-92a-3p, miR-2397-5p, miR-30c-2-3p, miR-181c-3p, let-7c-5p, miR-34c-5p, miR-370-3p, miR-141-3p, miR-10b-3p, miR-1814c, miR-503-3p, miR-18a, miR-3154, miR-6128, miR-138-5p, miR-28-5p, miR-486b-3p, miR-370-5p, let-7g-5p, miR-544b, miR-103, miR-2355-3p, miR-133b-5p, miR-122-3p, miR-26b-3p, miR-138, miR-30b-3p, miR-145a-5p, miR-3071-5p, miR-374b-3p, miR-130b-5p, miR-101-5p, miR-382, miR-124-5p, miR-452-5p, miR-125a-5p, miR-34b, miR-363, miR-107, miR-6395, miR-18b, novel\_27, miR-449a, miR-219b-3p, miR-342-3p, miR-542-5p, miR-17-3p, miR-1193, miR-92a-3p, miR-656-5p, miR-502-5p, miR-6529b, miR-34c, let-7i, miR-23b-3p, miR-210-3p, miR-23c, miR-328-3p, miR-142-3p, miR-34a-5p, miR-30c-5p, miR-1961, miR-193b-5p, miR-376a-5p, miR-486-3p, miR-345-3p, miR-98-5p, let-7k, miR-



miR-30f, miR-125a-3p, miR-200a-3p, miR-200a, miR-450c-5p, miR-450b-5p, miR-148b-5p, miR-1343-5p, miR-155-5p, miR-30c, miR-1224-5p, miR-6517, miR-2284z, miR-505-5p, miR-9-5p, novel\_63, novel\_9, miR-193a-5p, miR-1197-3p, miR-93-5p, miR-30e-5p, miR-20b-5p, miR-329a, miR-345-5p, miR-2355-5p, miR-1271, miR-574-5p, miR-133c, miR-3141, novel\_51, miR-377-3p, miR-493-5p, let-7a-2-3p, miR-22-3p, miR-450c-3p, novel\_23, miR-2113, miR-223-3p, miR-27b-3p, miR-16-1-3p, miR-381-5p, miR-31-5p, novel\_116, miR-412-5p, miR-1247-3p, miR-142b, miR-576-3p, miR-28c, miR-421-5p, miR-6123, miR-29a, miR-29c-3p, miR-3065-5p, miR-3591-3p, miR-3141, miR-2319a, miR-412-3p, miR-329-5p, miR-669, miR-320c, miR-677, miR-181b-3p, miR-374c-3p, novel\_69, miR-500a-5p, miR-30b, miR-202-5p, miR-143-3p, miR-664b-3p, miR-181b-1-3p, miR-1434-5p, miR-217-5p, miR-30c-5p, miR-2366, miR-193b-5p, miR-16-1-3p, miR-148a-5p, miR-184-3p, miR-106a, miR-210-3p, miR-665, miR-15b-3p, miR-874-5p, miR-4492, miR-665-5p, miR-3184-5p, miR-769-5p, miR-6525, miR-30d-5p, miR-433-3p, miR-625-5p, miR-345-5p, miR-30c-1-3p, miR-504-5p, miR-548o-3p, miR-10a, miR-2284s, miR-377-3p, miR-106b-5p, miR-381-5p, miR-1388-3p, miR-8485, miR-329-3p, miR-2284r, miR-541, miR-1298-5p, miR-362-3p, miR-181b-2-3p, miR-1343-3p, miR-148b-5p, miR-2459, miR-126a-5p, miR-218-5p, miR-3968, miR-9-5p, miR-2447, miR-423-5p, miR-877-3p, miR-361-3p, novel\_111, miR-378j, miR-493-5p, miR-1983, miR-9-3p, miR-299b-5p, miR-96-5p, miR-504, miR-2285u, miR-211-5p, miR-2319b, miR-4443, miR-2483-3p, miR-30c-2-3p, miR-217, miR-450a-2-3p, miR-29b-2-5p, miR-3529-3p, miR-1957a, miR-3065-3p, miR-28b, miR-218-2-3p, miR-29d-3p, miR-30a-5p, let-7a-2-3p, miR-10a-5p, miR-423-3p, miR-1271-5p, miR-26c, miR-29b-3p, miR-2332, miR-204-5p, miR-1306-5p, miR-92, miR-320a, miR-17-5p, miR-3074-1-3p, miR-7144-5p, miR-92a, miR-885-5p, miR-212-3p, novel\_120, miR-17-3p, miR-3959-3p, miR-877-3p, miR-2428, miR-4324, novel\_87, miR-7857-3p, miR-27a-3p, miR-1306, miR-7975, miR-124a, miR-744-3p, miR-1306-5p, novel\_51, miR-29b-1-5p, miR-2285l, miR-2285o, miR-27a-3p, miR-425-3p, miR-223-3p, miR-374b-3p, miR-30b-3p, miR-125b-2-3p, miR-16-1-3p, miR-2426, miR-30b-3p, miR-27b-3p, miR-145a-3p, miR-4510, miR-539-5p, miR-1306-5p, miR-3074-2-3p, miR-6134, miR-145-3p, miR-410-5p, miR-551b-3p, miR-665, miR-664a, miR-17-3p, miR-548o-3p, miR-6130, miR-877-5p, miR-503-3p, miR-10b-3p, miR-671-5p, novel\_99, miR-1827, miR-543-3p, miR-2285w, miR-3529-3p, miR-2403, miR-130a-5p, miR-376a-5p, miR-29b-1-5p, miR-2478, miR-192-3p, miR-29a-5p, miR-2285p, miR-30f, miR-17-3p, miR-1b-3p, miR-2284h-5p, miR-582-3p, miR-2300b-3p, miR-1197-5p, miR-124-3p, miR-142-3p

SNX9 ENSOARGO(sorting)

STK39 ENSOARGO(serine t

miR-218-1-3p, miR-34a-5p, miR-215-5p, miR-1193, miR-188-3p, miR-1434-5p, miR-140-3p, miR-487a-3p, miR-23b-3p, miR-15a-5p, miR-23c, miR-18a-3p, miR-1b-3p, miR-485-3p, miR-212-5p, miR-30b-3p, miR-34b-5p, miR-21-3p, miR-324-3p, miR-125b, miR-185-3p, miR-345-3p, miR-181b-1-3p, miR-486-3p, miR-143-3p, miR-503-5p, miR-345-3p, miR-2312, miR-345-5p, miR-339b, miR-1827, miR-27b-5p, miR-192-5p, miR-544-3p, miR-6130, miR-204-3p, miR-15b-5p, miR-877-5p, miR-30c-1-3p, miR-370-5p, miR-552-3p, miR-6516-3p, miR-664a, miR-4492, miR-874-5p, miR-129-5p, miR-424-5p, miR-324-3p, miR-665, miR-664a-5p, miR-3604, miR-769-5p, miR-4510, miR-544a, miR-323b, miR-30b-3p, miR-496-5p, miR-216a-3p, miR-1185-3p, miR-1343-3p, miR-2300a-5p, miR-181b-2-3p, miR-1185-5p, miR-25-5p, novel\_103, miR-505, miR-323b-3p, miR-16b, miR-30c-1-3p, miR-4532, miR-8485, miR-424-5p, miR-101b-3p, miR-23a-3p, let-7c-3p, miR-877-3p, miR-1983, miR-361-3p, miR-3596, miR-3082-5p, miR-4443, miR-1185-2-3p, miR-10b, miR-7689-3p, novel\_82, miR-101-3p, miR-371a-5p, miR-769-5p, miR-361-3p, miR-7705, miR-2447, miR-2285f, miR-452-5p, let-7a-2-3p, miR-345-3p, miR-3578, miR-29d-3p, miR-322-5p, miR-758-5p, miR-214-5p, novel\_79, miR-196a-2-3p, miR-200a-3p, novel\_127, miR-30c-2-3p, miR-339a, novel\_39, miR-200a, miR-490-3p, miR-1271-3p, miR-345-5p, let-7g-3p, miR-23a-5p, miR-485-5p, miR-23b, miR-34c-5p, miR-769, miR-542-5p, miR-141-3p, miR-1271, miR-125a, miR-215-5p, miR-486b-3p, miR-2433, miR-29b-3p, miR-370-5p, miR-331-3p, miR-125b-5p, miR-26c, miR-16-5p, miR-29b, miR-16b, miR-30b-3p, miR-497-5p, miR-744-5p, miR-6239, miR-542-3p, miR-503-5p, miR-194-3p, miR-544b, miR-339-5p, miR-125a-5p, miR-466f-3p, miR-503-5p, novel\_51, miR-432-3p, miR-539-3p, let-7a-2-3p, miR-345-5p, miR-363-5p, miR-1991, miR-450b-3p, miR-412-3p, miR-195a-5p, miR-2285ab, miR-

miR-502b, miR-203b-5p, miR-34c, miR-28c, miR-142b, miR-4324, miR-2428, miR-199b-5p, novel\_27, miR-449a, miR-371b-3p, miR-24-3p, miR-17-3p, miR-193b-3p, miR-379-5p, miR-6395, miR-1291, miR-216a-3p, miR-18a-3p, miR-148a-3p, miR-669, miR-6535, novel\_69, miR-34b, miR-26b-5p, miR-3074-5p, miR-193a-3p, miR-125a-5p, miR-2331-5p, miR-197-5p, miR-330-3p, miR-503-3p, miR-432-3p, miR-363-5p, miR-6240, miR-27b-3p, miR-7862, miR-16-1-3p, miR-1260b, miR-138, miR-30b-3p, miR-1843b-5p, miR-1434-3p, novel\_116, miR-194-3p, miR-149-5p, miR-134-3p, miR-31-5p, miR-592, miR-486b-3p, miR-28-5p, miR-31-3p, miR-138-5p, miR-331-3p, miR-125b-5p, miR-100-3p, miR-5100, miR-2433, miR-145-3p, miR-1260b, miR-500b-5p, miR-133a-3p, novel\_42, miR-1306-5p, miR-671-5p, miR-485-5p, miR-7144-5p, miR-2474, miR-362-5p, miR-3154, miR-199a-5p, miR-365a-3p, miR-34c-5p, miR-615-5p, miR-215-5p, miR-125a, miR-503-3p, miR-874-3p, miR-152-3p, novel\_96, novel\_127, miR-127-5p, miR-2898, miR-17-3p, miR-125a-3p, miR-1260a, novel\_39, miR-3065-3p, miR-199a-5p, miR-1957a, miR-28b, miR-450b-5p, miR-30a-3p, miR-3064-5p, miR-29b-2-5p, miR-128-3p, miR-885-3p, miR-23b-5p, miR-3578, miR-3591-5p, novel\_121, miR-450a-1-3p, miR-545-5p, miR-505-5p, miR-490-5p, miR-4726-5p, miR-3968, miR-2440, miR-423-5p, miR-362-5p, miR-361-3p, miR-136-5p, miR-378j, miR-199b-5p, miR-361-3p, miR-27a-3p, miR-4443, miR-3082-5p, miR-378g, miR-452-3p, miR-2319b, miR-3064-5p, miR-214-3p, miR-199b-5p, miR-1185-5p, miR-3085-3p, miR-491-5p, novel\_19, miR-29b-1-5p, miR-3187-3p, miR-376b, miR-33a-5p, miR-2330-5p, miR-124a, miR-21b, miR-1839-5p, miR-30b-3p, miR-296-5p, miR-500-5p, miR-9788-3p, miR-539-5p, miR-27a-3p, miR-2300a-5p, miR-330-3p, miR-151a-3p, miR-487a-5p, miR-4492, miR-874-5p, miR-708-5p, miR-17-3p, miR-450b-3p, miR-320a, miR-29b-2-5p, miR-151-3p, miR-324-3p, miR-30a-3p, miR-

miR-34b-5p, miR-548o-3p, miR-32-3p, miR-532-5p, miR-21-3p, miR-3065-3p, miR-6130, miR-377-3p, miR-10a, miR-15b-5p, miR-30e-3p, miR-665, miR-30a-3p, miR-130b-5p, miR-424-5p, miR-208b-5p, miR-4510, miR-3074-2-3p, miR-346, miR-10b-5p, miR-2366, miR-1434-5p, miR-140-3p, miR-5703, miR-1193, miR-2904, miR-664-5p, miR-30d-3p, miR-3600, miR-15a-5p, miR-200b, miR-7859, miR-2284h-5p, miR-2285p, novel\_17, miR-196a-3p, miR-760-3p, miR-21-3p, miR-3653-3p, miR-2285w, miR-664b-3p, miR-146a-5p, miR-199b-5p, miR-376a-3p, miR-452-3p, miR-211-5p, miR-2483-3p, miR-3082-5p, miR-7857-3p, miR-376d, miR-144-5p, novel\_82, miR-2285n, miR-218-5p, miR-382-3p, miR-107-5p, miR-3968, miR-490-5p, miR-3956-3p, novel\_60, miR-32-3p, miR-10b, miR-30b-3p, miR-323b, miR-2426, miR-105-1, miR-1343-3p, miR-145b, miR-376b-3p, miR-539-5p, miR-153, miR-9788-3p, miR-455-3p, miR-342, miR-16b, miR-323b-3p, miR-491-5p, miR-1185-5p, miR-103a-2-5p, miR-153-3p, miR-146b, miR-199b-5p, miR-494-3p, miR-1839-3p, miR-424-5p, miR-744-3p, miR-1b-5p, miR-8485, miR-3154, miR-345-5p, miR-329b, let-7g-3p, miR-1248, miR-3074-1-3p, miR-365a-3p, miR-374c-3p, miR-199a-5p, miR-5100, miR-2332, miR-1-5p, miR-29b-3p, miR-3969, miR-134-5p, miR-204-5p, miR-592, let-7e-3p, miR-144-5p, miR-16-5p, miR-365a-5p, miR-134, miR-29d-3p, miR-10a-5p, miR-200b-3p, miR-105-2, miR-128-3p, miR-429-3p, miR-322-5p, miR-134-5p, miR-200c, miR-6119-5p, miR-376b-3p, miR-205-5p, miR-1a-2-5p, miR-127-5p, miR-200c-3p, novel\_96, miR-107, miR-3529-3p, miR-30a-3p, miR-192-3p, miR-3065-3p, novel\_39, miR-199a-5p, miR-376b-5p, miR-3065-5p, miR-376b-3p, miR-216a-3p, miR-3591-3p, miR-107, miR-195a-5p, miR-6516-3p, miR-2319a, miR-146b-5p, miR-10a-5p, novel\_69, miR-670-3p, miR-374c-3p, miR-29a-3p, miR-677, miR-133a-5p, miR-6402, miR-15a, miR-16a, novel\_1, miR-29a, miR-128-1-5p, miR-147-5p, miR-1a-1-miR-30d, miR-500a-5p, miR-30b, miR-26a-5p, miR-450b-5p, miR-24-2-5p, miR-487a, miR-30c, miR-300, miR-30a-5p, miR-30c-5p, miR-1290, miR-582-3p, miR-2284z, miR-7859, miR-487a-3p, miR-24-2-5p, miR-485-3p, miR-2285j, miR-2332, miR-3607-3p, miR-1814c, miR-10b-3p, miR-876-3p, let-7g-3p, miR-154b-3p, miR-30f, miR-30d-5p, miR-30e-5p, miR-299, miR-21a-3p, miR-381-3p, miR-22-3p, miR-2285aa, miR-154a-3p, miR-487a-3p, miR-452-5p, miR-466f-3p, miR-330-3p, miR-539-3p, miR-2310, miR-628-5p, miR-493-5p, miR-6240, miR-2284aa, miR-27b-3p, miR-22-3p, miR-6238, miR-27a-3p, miR-330-3p, miR-548w, miR-154-3p, miR-335, miR-1973, miR-33a-3p, novel\_87, miR-30b-5p, miR-374c-5p, novel\_60, miR-335-5p, miR-3956-3p, miR-493-5p, miR-544-5p, miR-3065-5p, miR-27a-3p, miR-25, miR-7-1-3p, miR-26b-5p, miR-24-1-5p, miR-2319b

SRP72 ENSOARGO(signal r

MTDH ENSOARGO(metadher

miR-151-3p, miR-30a-3p, miR-665, miR-3604, miR-874-5p, miR-4492, miR-669a-3p, novel\_74, miR-433-5p, miR-3184-3p, miR-6525, miR-769-5p, miR-224-5p, novel\_44, miR-411, miR-30d-5p, miR-450a-1-3p, miR-1895, miR-625-5p, miR-543-3p, miR-186-5p, miR-216b-3p, miR-2331-3p, miR-2284s, miR-324-3p, miR-422a, miR-345-3p, miR-30b, novel\_17, miR-329a-5p, miR-486-3p, miR-143-3p, miR-664b-3p, miR-377-5p, miR-378a-3p, miR-30c-5p, miR-378i, miR-193b-5p, miR-34a-5p, miR-142-3p, miR-33b-3p, miR-30d-3p, miR-212-5p, miR-18a-3p, miR-1247-5p, miR-328-3p, miR-95-3p, miR-23b-3p, miR-23c, miR-218-5p, novel\_82, miR-615, miR-3968, miR-2447, miR-1285-5p, miR-361-3p, miR-877-3p, miR-136-5p, miR-211-5p, miR-3596, miR-378g, miR-505, miR-29b-1-5p, miR-491-5p, miR-23a-3p, miR-744-3p, miR-8485, miR-2310, miR-378d, miR-329-3p, miR-2284r, miR-21b, miR-362-3p, miR-181b-2-3p, miR-330-3p, miR-1343-3p, miR-125b-5p, miR-1197-3p, miR-1260b, miR-23b, miR-30e-5p, miR-1248, miR-2318, miR-329a, miR-2285aa, miR-2355-5p, miR-125a, miR-874-3p, miR-8117, novel\_96, miR-152-3p, novel\_127, miR-3064-5p, miR-29a-5p, miR-2285b, miR-148b-5p, miR-1343-5p, miR-330-5p, miR-30c, miR-1224-5p, miR-18b-5p, miR-299a-3p, miR-2285ad, miR-6517, miR-450a-1-3p, miR-505-5p, miR-4324, miR-28c, miR-193b-3p, miR-1839-3p, miR-335-5p, miR-1306, miR-150-5p, miR-216a-3p, miR-3065-5p, miR-148a-3p, miR-378f, miR-329-5p, miR-677, novel\_69, miR-299b-3p, miR-2411-3p, miR-194a, novel\_51, miR-7-5p, miR-193a-3p, miR-628-5p, miR-6240, miR-2285r, miR-432-3p, miR-432-3p, miR-450c-3p, miR-19b-2-5p, miR-432, miR-7b-5p, miR-1843b-5p, miR-223-3p, miR-27b-3p, miR-188-5p, miR-31-5p, novel\_116, miR-194-3p, miR-134-3p, miR-19b-1-5p, miR-320e, miR-487a-5p, miR-450b-3p, miR-664a, miR-17-3p, miR-3074-2-3p, miR-378c, miR-4510, miR-6134, miR-338-3p, miR-3613-5p, miR-30f, miR-18a-5p, miR-921-

miR-200b-3p, miR-300, miR-330-5p, miR-30a-5p, miR-61b-3p, miR-3578, miR-545-5p, miR-486-5p, miR-9-5p, miR-431, miR-299a-3p, miR-222, miR-2285ad, miR-429-3p, miR-200a-3p, miR-17-3p, miR-28-3p, miR-200c-3p, miR-181b-5p, miR-30f, miR-30c-2-3p, miR-200c, miR-664-3p, novel\_39, miR-1957a, miR-376c-5p, miR-376b-5p, miR-490-3p, miR-148b-5p, miR-4286, miR-181a-2-3p, miR-7144-5p, miR-362-5p, miR-23b, miR-30e-5p, miR-381-3p, miR-488-3p, miR-133c, miR-374c-3p, miR-769, miR-125a, miR-141-3p, miR-191-5p, miR-125b-5p, miR-331-3p, miR-135a-5p, miR-3969, miR-135a-1-3p, miR-500b-5p, miR-6128, miR-28a-3p, miR-744-5p, miR-16-1-3p, miR-1285, miR-2355-3p, miR-2285g, miR-503-5p, miR-134-3p, miR-185-5p, miR-377-5p, miR-3955-5p, miR-125a-5p, novel\_51, miR-503-5p, miR-146a, miR-2285r, miR-363-5p, miR-146b-5p, miR-505-3p, miR-135b-5p, miR-1306, miR-150-5p, miR-378b, miR-677, miR-6535, miR-181b-3p, miR-299b-3p, miR-670-3p, miR-320b, miR-625-3p, miR-656-5p, miR-147-5p, miR-502b, miR-4324, miR-133a-5p, miR-326-3p, miR-2428, miR-24-3p, miR-17-3p, miR-16-1-3p, miR-218-1-3p, miR-378d, miR-148a-5p, miR-1197-5p, miR-188-3p, miR-140-3p, miR-191, miR-2366, miR-2300b-3p, miR-532-3p, miR-7859, miR-23b-3p, miR-23c, miR-200b, miR-505-3p, miR-548e-3p, miR-30d, miR-221-5p, miR-299-3p, miR-324-3p, miR-125b, novel\_17, miR-146a-5p, miR-377-5p, miR-130a-5p, miR-181b-1-3p, miR-345-3p, miR-216c-5p, miR-503-5p, miR-1895, miR-186-5p, miR-1827, miR-500a-3p, miR-30d-5p, miR-2285c, miR-499b-3p, miR-140-5p, miR-2331-3p, miR-30c-1-3p, miR-221-5p, miR-504-5p, miR-548o-3p, miR-500, miR-874-5p, miR-6516-3p, miR-17-3p, miR-664a, miR-2285j, miR-222-3p, miR-3184-5p, miR-338-3p, miR-6525, miR-769-5p, miR-7857, miR-301b-5p, miR-143-5p, miR-148b-5p, miR-500-5p, miR-221-3p, miR-2285e, miR-421, miR-126a-5p, miR-181b-2-3p, novel\_78, miR-1343-3p, miR-2300a-5p, miR-146b, miR-103a-2-

miR-228baf, miR-376b-3p, miR-200c, miR-30f, miR-28-3p, miR-200c-3p, miR-1a-2-5p, miR-127-5p, miR-6536, miR-181b-5p, novel\_127, miR-152-3p, miR-200a-3p, miR-29b-2-5p, miR-30a-3p, miR-3064-5p, miR-181a-2-3p, miR-450b-5p, miR-200a, novel\_39, miR-2284a, miR-345-3p, miR-3591-5p, miR-1290, miR-134, miR-582-3p, miR-200b-3p, miR-128-3p, miR-2285ad, miR-429-3p, miR-412, miR-18b-5p, miR-9-5p, miR-483-3p, miR-134-5p, miR-214-5p, miR-2284k, miR-1-5p, miR-494-5p, miR-6740-5p, miR-100-3p, miR-767-5p, novel\_9, miR-374b-3p, miR-134-5p, miR-28a-3p, miR-133a-3p, miR-323-3p, miR-145-3p, miR-301, miR-18a, miR-767, miR-345-5p, miR-23a-5p, miR-1814c, miR-671-5p, miR-487a-3p, miR-3068-3p, miR-2285aa, miR-141-3p, miR-331-5p, miR-133c, miR-2284n, miR-190a, miR-194a, miR-2411-3p, miR-483-3p, miR-130b-5p, miR-382, miR-101-5p, miR-363-5p, miR-2483-5p, let-7f-2-3p, let-7f-2-3p, miR-654-3p, miR-432-3p, miR-432-3p, miR-539-3p, let-7j, miR-345-5p, miR-708-3p, miR-181a-5p, miR-1285, miR-1843b-5p, miR-223-3p, miR-2113, miR-194-5p, novel\_23, miR-2284ab, miR-26a-2-3p, miR-7862, miR-2284x, miR-130a-3p, miR-26b-3p, miR-2284d, miR-3431, miR-149-5p, miR-6238, miR-2355-3p, miR-576-3p, novel\_1, miR-421-5p, miR-625-3p, miR-22-5p, miR-203b-5p, miR-1a-1-5p, miR-495-3p, miR-323c, miR-3959-3p, miR-374c-5p, miR-301b-3p, miR-2285ab, miR-18b, miR-148a-3p, miR-216a-3p, miR-376b-3p, miR-3065-5p, miR-18a-3p, miR-19a-3p, miR-2284e, miR-9851-3p, novel\_68, miR-7-1-3p, miR-2404, miR-670-3p, miR-216a-5p, miR-345-3p, miR-2284m, miR-466i-5p, miR-2484, miR-216c-5p, miR-487a, miR-2285w, miR-105-3p, miR-376a-5p, miR-421-5p, miR-130a-5p, miR-125b-2-3p, miR-2432, miR-143-3p, miR-376a-5p, miR-124-3p, miR-98-3p, miR-1197-5p, miR-188-3p, miR-1434-5p, miR-19b-3p, miR-142-3p, miR-664-5p, let-7a-3p, miR-361-5p, miR-18a-3p, miR-485-3p, miR-30d-3p, miR-23b-

miR-3064-5p, novel\_39, miR-1271-3p, miR-148b-5p, miR-380-5p, miR-30c-2-3p, miR-6119-5p, miR-200c, miR-543-5p, miR-200c-3p, miR-429-3p, novel\_121, miR-214-5p, miR-505-5p, miR-1343-5p, miR-330-5p, miR-345-3p, miR-200b-3p, miR-133a-3p, miR-93, miR-331-3p, miR-125b-5p, miR-6740-5p, miR-3969, miR-410-5p, miR-486b-3p, miR-138-5p, miR-125a, miR-1271, miR-615-5p, miR-3068-3p, miR-93-5p, miR-320a, miR-17-5p, miR-3154, miR-2448-3p, miR-20b-5p, miR-876-3p, miR-363-5p, miR-380-5p, miR-432-3p, miR-432-3p, novel\_51, miR-106a-5p, miR-17-5p, miR-2411-3p, miR-125a-5p, miR-1343-5p, miR-193a-3p, miR-133b-5p, miR-149-5p, miR-194-3p, miR-2355-3p, miR-20b, miR-1285, miR-1434-3p, miR-4508, miR-138, miR-30b-3p, miR-219a-1-3p, miR-193b-3p, miR-342-3p, miR-326-3p, miR-2284w, miR-2428, miR-20a-5p, miR-320c, miR-669, miR-6395, miR-1291, miR-20a, miR-486-3p, miR-345-3p, miR-125b, miR-221-5p, miR-21-3p, miR-320d, miR-106a, miR-760-3p, miR-106a, miR-532-3p, novel\_83, miR-328-3p, miR-200b, miR-124-3p, miR-5703, miR-148a-5p, miR-4429, miR-665-5p, miR-6134, miR-6525, miR-4492, miR-30c-1-3p, miR-504-5p, miR-221-5p, miR-2284s, miR-193b-3p, miR-21a-3p, miR-133b-3p, miR-124a, miR-106a-5p, miR-30c-1-3p, miR-2957, miR-323b-3p, miR-106b-5p, miR-342, miR-320b, miR-326, novel\_115, miR-103a-2-5p, miR-3085-3p, miR-1343-3p, miR-9788-3p, miR-148b-5p, miR-323b, miR-30b-3p, miR-2284r, miR-541, miR-3059-5p, miR-541-3p, miR-107-5p, miR-3968, miR-3064-5p, miR-2319b, miR-3082-5p, miR-140-5p, miR-877-3p, miR-504

RPS6KA1 ENSOARGO(ribosoma) miR-30d-5p, miR-30a-5p, miR-1843b-5p, miR-30e-5p, miR-30c-5p, miR-1248, miR-30c, miR-450b-5p, miR-133b-3p, miR-3065-3p, novel\_68, miR-3064-5p, miR-877-5p, miR-3431, miR-7857-3p, miR-107-5p, miR-409-3p, miR-30f, miR-30b, miR-30b-5p, miR-103a-2-5p, miR-208b-5p, miR-30d, miR-3085-3p, miR-2898, miR-133a-3p, miR-3064-5p, miR-6134, miR-145-3p, miR-2432, miR-3065-3p

C10orf107 ENSOARGO( chromosom) miR-330-3p, miR-29b-1-5p, miR-214-3p, miR-382-3p, miR-6240, miR-494-3p, miR-345-5p, let-7a-2-3p, miR-8485, miR-30b-3p, miR-181a-5p, miR-301b-5p, miR-484, miR-744-5p, miR-4508, miR-30b-3p, miR-138, miR-330-3p, novel\_116, miR-455-3p, miR-216a-3p, miR-185-5p, miR-412-5p, miR-301a-5p, novel\_87, miR-2440, novel\_82, miR-335, miR-1193, miR-181d-5p, miR-335-5p, miR-3059-5p, miR-361-3p, miR-1983, miR-6395, miR-412-3p, miR-1291, miR-499b-5p, miR-3074-5p, miR-185-3p, miR-324-3p, miR-125a-3p, miR-181b-5p, miR-127-5p, miR-345-3p, miR-200a, miR-486-3p, miR-130a-5p, miR-29b-1-5p, miR-134, miR-3591-5p, let-7a-2-3p, miR-328-3p, miR-134-5p, miR-6740-5p, miR-370-5p, miR-2433, miR-486b-3p, miR-134-5p, miR-410-3p, miR-138-5p, novel\_74, miR-214, miR-3074-5p, miR-6134, miR-181c-5p, miR-1197-3p, miR-582-5p, miR-543-3p, miR-345-5p, let-7g-3p, miR-345-5p, miR-876-3p, miR-216b-3p, miR-370-5p, miR-574-5p, miR-223-5p, miR-582-5p

DYNLT1 ENSOARGO( dynein,



miR-299b-5p, miR-376a-3p, miR-335-3p, miR-544-5p, miR-877-3p, miR-361-3p, miR-25, miR-378e, miR-203-3p, miR-1185-2-3p, miR-376d, miR-4792, miR-20a-3p, miR-2319b, miR-7977, miR-3968, miR-3964, miR-30b-5p, novel\_82, miR-301a-5p, miR-877-3p, novel\_111, miR-1285-5p, miR-3059-5p, miR-2447, miR-452-5p, miR-378c, miR-450b-5p, miR-378b, miR-2284r, miR-301b-5p, miR-7857, miR-323b, miR-1a-3p, miR-758-3p, miR-376b-3p, miR-148b-5p, miR-1185-3p, miR-2285e, miR-330-3p, miR-105-1, miR-491-5p, miR-130b-3p, miR-320b, miR-342, miR-323b-3p, miR-378d, miR-8485, miR-758-3p, miR-2310, miR-382-3p, miR-2330-5p, miR-33a-5p, miR-30f, miR-345-5p, miR-299, miR-2285c, miR-30d-5p, miR-6516, novel\_32, miR-204-3p, miR-140-5p, miR-378a-3p, miR-545-3p, miR-216b-3p, miR-21-3p, miR-296-3p, miR-454-3p, miR-129-5p, miR-130b-5p, miR-19b-1-5p, miR-665, miR-320e, miR-6525, miR-338-3p, miR-378c, miR-4429, novel\_73, miR-19b-3p, miR-664-5p, miR-218-1-3p, miR-148a-5p, miR-30c-5p, novel\_133, miR-378i, miR-378a-3p, miR-1197-5p, miR-1193, miR-95-3p, miR-200b, miR-1247-5p, miR-212-5p, miR-320d, miR-466i-5p, miR-30b-3p, miR-1277-5p, miR-30b, miR-500a-5p, miR-422a, miR-664b-3p, miR-2411, miR-486-3p, miR-2424, miR-143-3p, miR-183-5p, miR-19a-3p, miR-135b-5p, miR-378f, miR-376b-5p, miR-376b-3p, miR-3591-3p, miR-2404, miR-670-3p, miR-320c, miR-329-5p, miR-3120-3p, miR-7-1-3p, novel\_1, miR-22-5p, miR-502-5p, miR-6529b, miR-6402, miR-576-3p, miR-301b-3p, miR-2284w, miR-342-3p, novel\_101, miR-495-3p, miR-188-5p, miR-6239, miR-432, miR-19b-2-5p, miR-1434-3p, miR-223-3p, miR-450c-3p, miR-374b-3p, miR-432-5p, miR-2285g, miR-194-3p, miR-2355-3p, miR-31-5p, miR-124-5p, miR-378a-5p, miR-466f-3p, miR-296-3p, miR-330-3p, miR-105-5p, miR-296-3p, miR-345-5p, miR-130b-5p, miR-6240, let-7f-2-3p, let-7f-2-3p, miR-876-3p, miR-345-5p, miR-320b, miR-7144-5p, miR-

miR-30f, miR-18a-5p, miR-88b-3p, miR-500a-3p, miR-30d-5p, miR-2284s, miR-139-5p, miR-6130, miR-204-3p, miR-22-3p, miR-151b, miR-378a-3p, miR-3065-3p, miR-552-3p, miR-296-3p, miR-874-5p, miR-500, miR-129-5p, miR-30e-3p, miR-219b-3p, miR-324-3p, miR-30a-3p, miR-665, miR-320e, miR-206-3p, miR-122-5p, miR-3184-5p, miR-433-5p, miR-378c, miR-4510, miR-145a-3p, miR-129-2-3p, miR-425-5p, miR-214, miR-34a-5p, novel\_133, miR-30c-5p, miR-378i, miR-362-3p, miR-2904, miR-378a-3p, miR-5703, miR-148b-3p, miR-151-5p, miR-1247-5p, miR-2284h-5p, miR-328-3p, miR-3960, miR-18a-3p, miR-3600, miR-1b-3p, miR-30d-3p, miR-34b-5p, miR-30d, miR-21-3p, miR-30b, miR-210-5p, miR-500a-5p, miR-324-3p, miR-422a, miR-122-3p, miR-29b-1-5p, miR-377-5p, miR-130a-5p, miR-125b-2-3p, miR-2424, miR-486-3p, miR-2285w, miR-147-3p, miR-136-5p, miR-361-3p, miR-199b-5p, miR-378e, miR-378g, miR-4443, miR-500-3p, miR-27a-3p, miR-4792, miR-139-5p, miR-4726-5p, miR-30b-5p, miR-615, miR-2285y, miR-361-3p, miR-502-3p, miR-423-5p, miR-219a-2-3p, miR-2447, miR-541-3p, miR-378c, miR-362-3p, miR-16-2-3p, miR-3120-5p, miR-329-3p, miR-378b, miR-484, miR-541, miR-1a-3p, miR-501-3p, miR-9788-3p, miR-455-3p, miR-2459, novel\_4, miR-27a-3p, miR-199b-5p, miR-214-3p, miR-5126, miR-1306-5p, miR-326, miR-362-3p, miR-2957, miR-29b-1-5p, miR-378d, miR-3187-3p, miR-193a, miR-4532, miR-491-3p, miR-676-3p, miR-329a, miR-23a-5p, miR-7144-5p, miR-1248, miR-485-5p, miR-30e-5p, miR-18a, miR-34c-5p, miR-199a-5p, miR-324-5p, miR-154b-5p, miR-874-3p, miR-370-3p, miR-2355-5p, miR-615-5p, miR-138-5p, miR-486b-3p, miR-592, miR-331-3p, miR-378c, miR-181a-2-3p, miR-6128, miR-3607-3p, miR-885-3p, miR-582-3p, miR-30c, miR-615-3p, miR-23b-5p, miR-330-5p, miR-30a-5p, miR-501-3p, miR-24-2-5p, miR-505-5p, miR-378h, miR-129-1-3p, miR-2285ad, miR-6517, miR-18b-5p, miR-2898, miR-543-5p, novel\_127, miR-152-

miR-21a-3p, miR-378a-3p, miR-21-3p, miR-323-5p, miR-544-3p, miR-338-5p, miR-29b-2-5p, miR-324-3p, miR-664a, miR-487a-5p, miR-378c, miR-338-3p, miR-6134, miR-362-3p, miR-1246, miR-376a-5p, miR-188-3p, miR-1197-5p, miR-5703, miR-19b-3p, miR-4429, miR-222-5p, miR-199a-3p, novel\_83, miR-616-3p, miR-532-3p, miR-196a-3p, miR-106a, miR-320d, miR-299-3p, miR-21-3p, miR-30b-3p, miR-20a, miR-29b-1-5p, miR-361-3p, miR-129b-5p, novel\_94, miR-452-3p, miR-20a-3p, miR-7977, miR-541-5p, miR-3082-5p, miR-378e, miR-769-5p, miR-3958-3p, miR-2285t, miR-3059-5p, miR-362-5p, miR-8095, miR-484, miR-378b, miR-30b-3p, miR-412-3p, miR-2426, miR-544a, miR-378c, miR-3120-5p, miR-16-2-3p, miR-2300a-5p, miR-105-1, miR-222-5p, miR-9788-3p, miR-500-5p, miR-216a-3p, miR-326, miR-320b, miR-342, miR-362-3p, miR-3955-3p, miR-1839-3p, miR-382-3p, miR-106a-5p, miR-376b, miR-33a-5p, miR-30c-1-3p, miR-758-3p, miR-3187-3p, miR-381-3p, miR-362-5p, miR-17-5p, miR-3154, miR-320a, let-7g-3p, miR-10b-3p, miR-485-5p, miR-1814c, miR-7144-5p, miR-141-3p, miR-769, miR-29b-3p, miR-144, miR-767-5p, miR-204-5p, miR-1306-5p, miR-374b, miR-6128, miR-500b-5p, miR-93, miR-378c, miR-145-3p, miR-134, miR-345-3p, miR-29d-3p, miR-218-2-3p, miR-300, let-7a-2-3p, miR-105-2, miR-128-3p, miR-483-3p, miR-378h, miR-1260a, miR-181c-3p, miR-30c-2-3p, miR-495-5p, miR-2385-3p, miR-29b-2-5p, miR-2478, miR-490-3p, miR-2285ab, miR-19a-3p, miR-6516-3p, miR-7975, miR-7-1-3p, miR-320b, miR-670-3p, miR-29a-3p, miR-2404, miR-323a-5p, miR-146b-3p, miR-20a-5p, miR-203b-5p, miR-656-5p, miR-342-3p, novel\_101, miR-24-3p, miR-211, miR-2428, miR-326-3p, miR-3071-5p, miR-374b-3p, miR-1260b, miR-29b, miR-30b-3p, miR-187-3p, miR-26b-3p, miR-377-5p, miR-665, miR-130a-3p, miR-544b, miR-20b, miR-224-5p, miR-106a-5p, miR-17-5p, miR-190a, miR-654-3p, miR-30c-1-3p, miR-2331-5p, miR-185-3p, let-7c-5p, miR-200c, miR-2397-5p, miR-2285p, miR-1277-5p, let-7k, let-7f-5p, miR-200c-3p, miR-98-5p, let-7g, miR-199a-5p, miR-192-3p, miR-142a-3p, miR-1961, miR-1290, let-7d, miR-485-3p, miR-429-3p, miR-616-3p, miR-487a-3p, miR-322-5p, miR-15a-5p, miR-144, miR-135a-5p, miR-15b-3p, let-7f, miR-424-5p, miR-4492, miR-487b-5p, miR-16-5p, miR-3074-2-3p, let-7b, let-7b-5p, miR-769-5p, miR-3154, miR-2285aa, miR-133c, miR-199a-5p, let-7i-5p, miR-15b-5p, miR-331-5p, miR-769, miR-197-5p, miR-330-3p, miR-16b, miR-7-5p, miR-199b-5p, let-7e, miR-124-5p, miR-628-5p, let-7a-5p, miR-424-5p, miR-6240, miR-7b-5p, miR-1843b-5p, miR-542-3p, miR-2113, miR-497-5p, miR-1839-5p, miR-16b, miR-330-3p, miR-142-3p, let-7g-5p, miR-1298-3p, miR-3431, miR-485-3p, miR-769-5p, miR-16a, let-7i, miR-15a, miR-218-5p, miR-203b-5p, miR-6119-3p, miR-495-3p, novel\_120, miR-219b-3p, miR-8095, miR-199b-5p, miR-199b-5p, miR-2319a, miR-1983, miR-195a-5p, miR-135b-5p, let-7e-5p, miR-136-5p, miR-412-3p, miR-541-5p, miR-320b, miR-7-1-3p, miR-2319b, miR-144-3p, let-7d-5p, miR-411b-3p, miR-2483-3p

miR-221, miR-148a-3p, miR-216a-3p, miR-1306, miR-1291, miR-378f, miR-493-5p, miR-3120-3p, miR-7977, miR-2285u, miR-378e, miR-2404, miR-6535, novel\_82, miR-4324, miR-502-5p, miR-301a-5p, miR-33a-3p, miR-107-5p, miR-206, miR-2284q, miR-2285t, miR-3956-3p, miR-541-3p, miR-342-3p, novel\_60, miR-2447, miR-3059-5p, miR-758-5p, miR-3957-3p, miR-2428, miR-301b-5p, miR-2113, miR-541, miR-378b, miR-296-5p, miR-329-3p, miR-1a-3p, miR-362-3p, miR-378c, miR-3120-5p, novel\_4, miR-2300a-5p, miR-133b-5p, miR-330-3p, miR-1298-3p, miR-2320-3p, miR-3431, miR-2285g, miR-2285e, miR-221-3p, miR-1306-5p, novel\_103, miR-342, miR-362-3p, miR-330-3p, miR-365b-5p, miR-466f-3p, miR-103a-2-5p, miR-214-3p, miR-493-5p, miR-6240, miR-380-5p, miR-378d, miR-654-3p, miR-2448-3p, miR-2285c, miR-21a-3p, miR-329a, miR-485-5p, novel\_99, miR-2331-3p, miR-221-5p, miR-378a-3p, miR-1271, miR-204-3p, miR-222-3p, miR-664a-5p, miR-664a, miR-4492, miR-1306-5p, miR-378c, miR-214, miR-206-3p, miR-378c, miR-365a-5p, miR-362-3p, miR-3591-5p, miR-378i, miR-378a-3p, miR-1197-5p, miR-133a-3p, miR-128-3p, miR-222, miR-380-5p, miR-3600, miR-148b-3p, miR-378h, miR-210-3p, miR-671-3p, miR-210-5p, miR-422a, miR-185-3p, miR-92a-1-5p, miR-466i-5p, miR-152-3p, miR-221-5p, miR-345-3p, miR-1, miR-380-5p, miR-1185-2-3p, miR-27a-3p, miR-4443, miR-2483-3p, miR-211-5p, miR-10b, miR-452-3p, miR-2319b, miR-20a-3p, miR-3064-5p, miR-335-3p, miR-504, miR-96-5p, miR-378j, miR-140-5p, miR-877-3p, miR-3956-3p, miR-2447, novel\_60, miR-1843a-3p, miR-628-3p, miR-107-5p, miR-769-5p, miR-615, miR-218-5p, miR-1185-3p, miR-9788-3p, miR-145b, miR-27a-3p, miR-5010-3p, miR-199b-3p, miR-105-1, miR-2300a-5p, novel\_4, miR-1343-3p, miR-330-3p, miR-2284aa, miR-2426, miR-450b-5p, miR-544a, miR-758-3p, miR-30b-3p, miR-412-3p, miR-10b, miR-143-5p, miR-2310, miR-758-3p, miR-193a, miR-30c-1-3p, miR-127-3p, miR-494-3p, miR-103a-2-5p, miR-491-5p, miR-3085-3p, miR-326, miR-320b, miR-342, miR-204-3p, novel\_32, miR-6130, miR-377-3p, miR-544-3p, miR-10a, miR-552-3p, miR-504-5p, miR-140-5p, miR-30c-1-3p, miR-625-5p, miR-411, miR-129b-3p, miR-769-5p, miR-10b-5p, miR-6525, miR-3074-2-3p, miR-1271, miR-4510, miR-145a-3p, miR-3074-5p, miR-539-5p, miR-130b-5p, miR-129-5p, miR-874-5p, miR-664a, miR-338-5p, miR-320e, miR-29b-2-5p, miR-2285j, miR-222-3p, miR-383-5p, miR-3600, miR-18a-3p, miR-378d, miR-218-1-3p, miR-4429, miR-19b-3p, miR-1197-5p, miR-5703, miR-1434-5p, miR-2904, novel\_133, miR-191, miR-486-3p, miR-421-5p, miR-376a-5p, miR-183-5p, miR-21-3p, miR-30b-3p, miR-1277-5p, miR-3653-3p, miR-320d, miR-125b, novel\_17, miR-6535, miR-320c, miR-146b-3p, miR-10a-5p, miR-655-5p, miR-3074-5p, miR-363, miR-6516-3p, miR-135b-5p, miR-19a-3p, miR-107, miR-3065-5p, miR-18a-3p, miR-150-5p, miR-2428, miR-2284w, miR-326-3p, miR-24-3p, miR-211, novel\_101, miR-2285x, miR-342-3p, miR-199c, miR-421-5p, miR-379-3p, novel\_1, miR-2284o, miR-6402, miR-502-5p, miR-4324, miR-544b, miR-103, novel\_116, miR-185-5p, miR-412-5p, miR-26b-3p, miR-103a-3p, miR-3955-5p, miR-31-5p, miR-27b-3p, miR-188-5p, miR-26a-2-3p, miR-30b-3p, miR-380-3p, miR-

SYTL3 ENSOARGO0( synaptot.

DLX6 ENSOARGO0( distal-1

miR-28b, miR-450b-5p, miR-199a-5p, miR-200a, miR-2403, miR-29b-2-5p, miR-30a-3p, miR-2898, miR-450a-2-3p, miR-543-5p, novel\_127, miR-2285af, miR-30c-2-3p, miR-1271-5p, miR-24-2-5p, miR-505-5p, miR-134-5p, miR-582-3p, miR-885-3p, miR-128-3p, miR-134, miR-345-3p, miR-615-3p, miR-1343-5p, novel\_42, miR-138-5p, miR-134-5p, miR-204-5p, miR-486b-3p, miR-5100, miR-410-5p, miR-2433, miR-331-3p, miR-365a-3p, miR-3965, miR-199a-5p, miR-874-3p, miR-574-5p, miR-2355-5p, miR-345-5p, miR-876-3p, miR-671-5p, miR-23a-5p, miR-320a, miR-345-5p, miR-193a-3p, miR-1343-5p, miR-2331-5p, novel\_51, miR-2411-3p, miR-134-3p, miR-2285g, miR-187-3p, miR-340-3p, miR-219a-1-3p, miR-138, miR-21-5p, miR-27b-3p, miR-4508, miR-369-5p, miR-3071-5p, miR-24-3p, miR-211, miR-2285m, miR-199b-5p, miR-193b-3p, miR-128-1-5p, miR-421-5p, miR-28c, miR-6529b, miR-146b-3p, miR-181b-3p, miR-677, miR-320c, miR-669, miR-320b, miR-450b-3p, miR-1291, miR-6395, miR-9851-3p, miR-2387, miR-216a-3p, miR-21c, miR-18a-3p, miR-1306, miR-181b-1-3p, miR-29b-1-5p, miR-421-5p, miR-486-3p, miR-2432, miR-105-3p, miR-216c-5p, miR-466i-5p, miR-760-3p, miR-320d, miR-2484, miR-185-3p, miR-345-3p, miR-324-3p, miR-219b-5p, miR-222-5p, miR-328-3p, miR-1247-5p, novel\_83, miR-151-5p, miR-199a-3p, miR-18a-3p, miR-30d-3p, miR-4429, miR-378d, miR-218-1-3p, miR-2408, novel\_133, miR-124-3p, miR-2904, miR-346, miR-6134, miR-338-3p, miR-3184-5p, miR-214, miR-665-5p, miR-1271, miR-664a, miR-129-5p, miR-4492, miR-30e-3p, miR-29b-2-5p, miR-369-5p, miR-30a-3p, miR-132-5p, miR-193b-3p, miR-151b, miR-30c-1-3p, miR-140-5p, miR-552-3p, novel\_107, miR-345-5p, miR-1827, miR-885-3p, miR-1895, miR-2285c, miR-30c-1-3p, miR-8485, miR-3187-3p, miR-2330-5p, miR-124a, miR-1388-3p, miR-214-3p, miR-199b-5p, novel\_103, miR-1306-5p, miR-320b, miR-100a-3p, miR-29b-1-5p, miR-1285-5p, miR-374c-5p, miR-371b-3p, miR-24-3p, miR-452-5p, novel\_60, miR-2447, miR-3956-3p, miR-541-3p, miR-22-5p, miR-4324, miR-142b, miR-320c, miR-203-3p, miR-378g, miR-7857-3p, miR-489, miR-24-1-5p, miR-363, miR-2319b, miR-335-3p, miR-7975, novel\_94, miR-6395, miR-450b-3p, miR-1291, miR-2285k, miR-1306, miR-21c, miR-18b, miR-193a, miR-130b-5p, miR-3955-3p, miR-105-5p, miR-320b, miR-1306-5p, miR-582, novel\_103, miR-411-5p, miR-142-5p, miR-134-3p, miR-105-1, novel\_4, miR-151a-3p, miR-7862, miR-3120-5p, miR-21-5p, miR-30b-3p, miR-380-3p, miR-3071-5p, miR-30b-3p, miR-541, miR-542-3p, miR-142a-5p, miR-129-2-3p, miR-129-5p, miR-130b-5p, novel\_74, miR-331-3p, miR-30a-3p, miR-151-3p, miR-100-3p, miR-409-3p, miR-655-3p, miR-30e-3p, miR-204-3p, miR-324-5p, miR-216b-3p, miR-370-3p, miR-574-5p, miR-140-5p, miR-874-3p, miR-18a-5p, miR-655, miR-18a, miR-320a, miR-3154, miR-488-3p, miR-503-3p, miR-29a-5p, miR-3956-5p, miR-143-3p, miR-2285b, miR-380-3p, miR-2285i, miR-24-2-5p, miR-130a-5p, miR-369-3p, miR-30a-3p, miR-1277-5p, miR-21-3p, miR-320d, miR-760-3p, miR-216a-5p, miR-324-3p, miR-217, miR-2284h-5p, miR-129-1-3p, miR-328-3p, miR-18b-5p, miR-30d-3p, miR-105-2, miR-4429, miR-217-5p, miR-2366

GNA12 ENSOARGO(guanine) ex:miR-1434-3p, miR-488-3p, miR-2447, miR-204-3p, miR-1298-3p

PCCA ENSOARGO(propiony) ex:miR-1434-3p, miR-488-3p, miR-2447, miR-204-3p, miR-1298-3p

XRN2 ENSOARGO(5'-3')

|        |                       |                                                                                                                                                                                                                                                                                                                                                                                                                                                                                                                                                                                                                                                                                                                                                                                                                                                                                                                                                                                                                                                                                                                                                                                                                                                                                                                                                                                                                                                                                                                                                                                                                                                                                                                                                                                                                                                                                                                          |
|--------|-----------------------|--------------------------------------------------------------------------------------------------------------------------------------------------------------------------------------------------------------------------------------------------------------------------------------------------------------------------------------------------------------------------------------------------------------------------------------------------------------------------------------------------------------------------------------------------------------------------------------------------------------------------------------------------------------------------------------------------------------------------------------------------------------------------------------------------------------------------------------------------------------------------------------------------------------------------------------------------------------------------------------------------------------------------------------------------------------------------------------------------------------------------------------------------------------------------------------------------------------------------------------------------------------------------------------------------------------------------------------------------------------------------------------------------------------------------------------------------------------------------------------------------------------------------------------------------------------------------------------------------------------------------------------------------------------------------------------------------------------------------------------------------------------------------------------------------------------------------------------------------------------------------------------------------------------------------|
| RNF11  | ENSOARGO(ring finger) | miR-2113, miR-2285af, miR-2285j, miR-218-2-3p, miR-504, miR-504-5p, novel_68, miR-24-3p, miR-2483-3p, miR-149-5p, miR-1343-5p, miR-330-5p, miR-200b-3p, miR-429-3p, novel_79, miR-505-5p, miR-214-5p, miR-200c, miR-6119-5p, miR-30c-2-3p, miR-339a, miR-17-3p, miR-200c-3p, miR-200a-3p, novel_96, miR-4286, miR-28b, miR-148b-5p, novel_39, miR-488-3p, miR-301, miR-3154, miR-23b, miR-329b, miR-671-5p, miR-1248, miR-2285aa, miR-2355-5p, miR-141-3p, miR-376c-3p, miR-144, miR-3969, miR-1306-5p, miR-181a-2-3p, miR-6128, miR-144-5p, miR-1197-3p, miR-542-3p, miR-22-3p, miR-30b-3p, miR-455-5p, miR-7862, miR-31-5p, miR-339-5p, miR-377-5p, miR-26b-3p, miR-3431, miR-149-5p, miR-194-3p, miR-544b, novel_51, miR-455-5p, miR-1343-5p, miR-660, miR-130b-5p, miR-432-3p, miR-2387, miR-1306, miR-1291, miR-450b-3p, miR-6395, novel_68, miR-216b-3p, miR-329-5p, miR-320b, miR-146b-3p, novel_69, miR-144-3p, miR-28c, miR-576-3p, miR-142b, miR-425-5p, novel_1, miR-656-5p, miR-625-3p, miR-17-3p, miR-542-5p, miR-326-3p, miR-                                                                                                                                                                                                                                                                                                                                                                                                                                                                                                                                                                                                                                                                                                                                                                                                                                                                              |
| ERAL1  | ENSOARGO(Era-like)    | 2284w, novel_133, miR-188-3p, novel_73, miR-148a-5p, miR-378d, miR-3600, miR-7859, miR-383-5p, miR-23b-3p, miR-200b, novel_83, miR-532-3p, miR-2284h-5p, miR-328-3p, miR-542-5p, miR-324-3p, miR-760-3p, miR-329a-5p, miR-2285w, miR-377-5p, miR-376c-3p, miR-2424, miR-129b-3p, miR-339b, miR-1827, miR-30c-1-3p, miR-660-5p, miR-182-5p, miR-544-3p, miR-376e-3p, miR-6130, miR-139-5p, miR-22-3p, miR-204-3p, miR-3604, miR-665, miR-17-3p, miR-451a, miR-664a, miR-874-5p, miR-130b-5p, miR-4510, miR-425-5p, miR-214, miR-3074-2-3p, miR-6525, miR-3184-5p, miR-484, miR-296-5p, miR-323b, miR-30b-3p, miR-544a, miR-3120-5p, miR-409b, miR-2320-3p, miR-455-3p, miR-148b-5p, miR-421, miR-2459, miR-1306-5p, miR-326, miR-323b-3p, miR-182-5p, miR-491-5p, miR-542-5p, miR-214-3p, miR-127-3p, miR-494-3p, miR-2330-5p, miR-101b-3p, miR-23a-3p, miR-33a-5p, miR-30c-1-3p, miR-361-3p, miR-139-5p, miR-20a-3p, miR-7680-3p, miR-7077, miR-144-5p, miR-1726-5p, miR-2447, miR-122-5p, miR-6119-5p, miR-200c, miR-125a-3p, miR-760-3p, miR-200c-3p, novel_127, miR-183-5p, miR-181a-2-3p, miR-2411, miR-134, miR-2366, miR-29d-3p, miR-188-3p, miR-142-3p, miR-133a-3p, miR-200b-3p, miR-18a-3p, miR-429-3p, miR-412, miR-2411-5p, miR-200b, novel_83, miR-134-5p, miR-29b-3p, miR-324-3p, miR-331-3p, miR-665, miR-664a, miR-874-5p, miR-134-5p, miR-214, miR-3074-2-3p, miR-346, miR-338-3p, miR-1827, miR-504-5p, miR-2355-5p, miR-615-5p, miR-544-3p, miR-132-5p, miR-324-5p, miR-3141, miR-214-3p, miR-574-3p, miR-628-5p, miR-33a-5p, miR-484, miR-873a-5p, miR-301b-5p, miR-541, miR-412-3p, miR-30b-3p, miR-30b-3p, miR-29b, miR-544a, miR-26b-3p, miR-1298-3p, miR-3431, miR-301a-5p, miR-128-1-5p, miR-29a, miR-2285t, miR-541-3p, miR-1296-5p, miR-29c-3p, novel_101, miR-452-5p, miR-361-3p, miR-3141, miR-18a-3p, miR-504, miR-877-3p, miR-452-3p, miR-7977, miR-146b-3p, miR-29a-3p, novel_69, miR-669 |
| KCTD15 | ENSOARGO(potassium)   |                                                                                                                                                                                                                                                                                                                                                                                                                                                                                                                                                                                                                                                                                                                                                                                                                                                                                                                                                                                                                                                                                                                                                                                                                                                                                                                                                                                                                                                                                                                                                                                                                                                                                                                                                                                                                                                                                                                          |

miR-144-5p, miR-20b-5p, miR-2318, miR-876-3p, miR-23b, miR-93-5p, miR-300-3p, miR-874-3p, novel\_127, novel\_96, miR-200a-3p, miR-127-5p, miR-125a-3p, novel\_39, miR-200a, miR-3064-5p, miR-330-5p, miR-1290, miR-196a-5p, miR-3591-5p, miR-129-1-3p, novel\_121, miR-758-5p, novel\_79, miR-412, miR-6517, miR-299a-3p, miR-2285ad, miR-29a, miR-576-3p, miR-28c, miR-199b-5p, miR-29c-3p, miR-193b-3p, miR-335-5p, miR-412-3p, miR-410-5p, miR-216a-3p, miR-3065-5p, miR-181b-3p, miR-6535, miR-677, miR-669, miR-320c, miR-299b-3p, miR-3120-3p, miR-193a-3p, miR-196b-5p, miR-483-3p, miR-2411-3p, novel\_51, miR-296-3p, miR-7-5p, miR-432-3p, miR-432-3p, miR-2285r, miR-6240, miR-27b-3p, miR-2284x, miR-26a-2-3p, miR-16-1-3p, novel\_23, miR-22-3p, miR-197-3p, miR-542-3p, miR-7b-5p, miR-432, miR-411-5p, miR-134-3p, miR-412-5p, miR-339-5p, miR-3955-5p, miR-4492, miR-190a-5p, miR-451a, novel\_74, miR-3604, miR-665, miR-151-3p, miR-30a-3p, miR-30e-3p, miR-224-5p, miR-769-5p, miR-6525, miR-214, miR-3958-5p, miR-129-2-3p, miR-3184-3p, miR-590-3p, miR-1827, miR-339b, miR-433-3p, miR-129b-3p, miR-216b-5p, miR-499b-3p, miR-10a, miR-2284s, miR-582-5p, miR-552-3p, miR-296-3p, miR-30c-1-3p, miR-504-5p, miR-3653-3p, miR-345-3p, miR-324-3p, miR-2285p, novel\_17, miR-618, miR-486-3p, miR-2424, miR-181b-1-3p, miR-2285w, miR-16-1-3p, miR-493-3p, miR-217-5p, miR-2366, miR-2284h-5p, miR-23c, miR-23b-3p, miR-212-5p, miR-30d-3p, miR-106a, miR-18a-3p, miR-3964, miR-615, novel\_82, miR-1285-5p, novel\_111, miR-361-3p, miR-877-3p, miR-190b-5p, miR-2447, miR-1983, miR-9-3p, miR-376a-3p, miR-504, miR-96-5p, miR-99b-5p, miR-378j, miR-140-5p, miR-4443, miR-144-5p, miR-203-3p, miR-378g, miR-499a-3p, miR-214-3p, miR-103a-2-5p, miR-199b-5p, miR-491-5p, miR-106b-5p, miR-323b-3p, miR-199a-3p, miR-744-3p, miR-23a-3p, miR-124a, miR-101c, miR-1839-5p, miR-1388-5p, miR-

novel\_60, miR-30b9-5p, miR-541-3p, miR-212-3p, miR-452-5p, miR-362-5p, miR-2285n, miR-769-5p, miR-335, miR-374a-3p, miR-3064-5p, miR-20a-3p, miR-7977, miR-378e, miR-3082-5p, miR-27a-3p, miR-199b-5p, miR-129b-5p, miR-106a-5p, let-7c-3p, miR-33a-5p, miR-30c-1-3p, miR-3187-3p, miR-3085-3p, miR-27a-3p, miR-500-5p, miR-484, miR-6529a, miR-378b, miR-143-5p, miR-10b, miR-412-3p, miR-125b-2-3p, miR-378c, miR-450b-5p, miR-101a-5p, miR-2284aa, miR-378c, miR-10b-5p, miR-206-3p, miR-132-5p, miR-664a, miR-378a-3p, miR-192-5p, miR-27a-5p, miR-323-5p, miR-877-5p, let-7g-3p, miR-133b-3p, miR-20a, miR-125b-2-3p, miR-130a-5p, miR-146a-5p, miR-196a-3p, miR-185-3p, miR-2284m, miR-106a, miR-760-3p, miR-30b-3p, miR-299-3p, miR-3600, miR-383-5p, miR-200b, miR-148b-3p, novel\_133, miR-215-5p, miR-135a-2-3p, novel\_101, miR-323c, miR-2428, miR-20a-5p, miR-22-5p, miR-10a-5p, miR-2404, miR-323a-5p, miR-379-5p, miR-101-5p, miR-296-3p, miR-345-5p, miR-17-5p, miR-106a-5p, miR-124-5p, miR-452-5p, miR-466f-3p, miR-432-5p, miR-185-5p, miR-2355-3p, miR-20b, miR-2284ab, miR-138, miR-1260b, miR-2889, miR-133a-3p, miR-93, miR-500b-5p, miR-374a-3p, miR-378c, miR-145-3p, miR-5100, miR-26c, miR-138-5p, miR-410-3p, miR-486b-3p, miR-374b-3p, miR-141-3p, miR-215-5p, miR-365a-3p, miR-769, miR-199a-5p, miR-2284n, miR-488-3p, miR-17-5p, miR-362-5p, miR-10b-3p, let-7g-3p, miR-376c-5p, miR-3074-1-3p, miR-671-5p, miR-485-5p, miR-1814c, miR-1, miR-30a-3p, miR-181a-2-3p, miR-199a-5p, miR-1260a, miR-2285af, miR-200c, miR-30c-2-3p, miR-339a, miR-217, miR-2898, miR-191-3p, miR-200c-3p, miR-543-5p, miR-378h, miR-545-5p, miR-134, miR-30a-5p, miR-582-3p, miR-128-3p, miR-200b-3p, miR-10a-5p, let-7a-2-3p, miR-3956-3p, miR-6527, miR-2284j, miR-9-5p, miR-218-5p, miR-2440, miR-490-5p, miR-203-3p, miR-1185-2-3p, miR-1113, miR-325-3p, miR-



novel\_83, miR-383-5p, miR-340-5p, miR-148b-3p, miR-200b, miR-3600, miR-548e-3p, let-7a-3p, miR-4429, miR-124-3p, miR-2904, miR-1197-5p, miR-5703, miR-215-5p, miR-2411, miR-29b-1-5p, miR-125b-2-3p, miR-20a, miR-216c-5p, miR-34b-5p, miR-1277-5p, miR-30b-3p, miR-221-5p, miR-320d, miR-106a, miR-2284m, miR-760-3p, miR-125b, miR-196a-3p, miR-374a-5p, miR-6516, miR-544-3p, miR-192-5p, miR-139-5p, miR-656-3p, miR-370-5p, miR-182-5p, miR-221-5p, miR-140-5p, miR-496-3p, miR-660-5p, novel\_99, let-7g-3p, miR-10b-5p, miR-425-5p, miR-539-5p, miR-664a, miR-320e, miR-216a-3p, miR-2285e, miR-142-3p, miR-27a-3p, miR-2300a-5p, novel\_4, miR-2284aa, miR-544a, miR-450b-5p, miR-101a-5p, miR-484, miR-6529a, miR-10b, miR-33a-5p, miR-106a-5p, miR-320b, miR-27a-3p, miR-7857-3p, miR-664b, miR-20a-3p, miR-10b, novel\_94, miR-129b-5p, miR-154a, miR-194b-5p, novel\_60, miR-541-3p, miR-2285t, miR-374a-3p, miR-2284q, miR-769-5p, miR-371a-5p, miR-2285y, miR-2285n, miR-545-5p, miR-6516-5p, miR-2411-5p, miR-200b-3p, miR-496, let-7a-2-3p, miR-10a-5p, miR-345-3p, miR-2284a, miR-4286, miR-107, miR-92a-3p, miR-543-5p, miR-200c-3p, miR-217, miR-2285af, miR-200c, miR-324-5p, miR-2284n, miR-34c-5p, miR-769, miR-215-5p, novel\_48, let-7g-3p, miR-320a, miR-17-5p, miR-381-3p, miR-503-3p, miR-93, miR-374a-3p, miR-6128, miR-374b, miR-486b-3p, miR-138-5p, miR-331-3p, miR-135a-5p, miR-34c-3p, miR-370-5p, miR-544b, miR-103, miR-20b, miR-432-5p, miR-2284d, miR-2285g, miR-185-5p, miR-26b-3p, miR-133b-5p, miR-7862, miR-2284ab, miR-138, miR-145a-5p, miR-194-5p, miR-1434-3p, miR-296-3p, miR-345-5p, miR-654-3p, miR-125a-5p, miR-660, miR-330-3p, miR-106a-5p, miR-17-5p, miR-224-5p, miR-34b, miR-320b, miR-10a-5p, miR-378b, miR-9851-3p, miR-7975, miR-135b-5p, miR-107, miR-378b, miR-449a, miR-24-3p, novel\_101, miR-1193, miR-2285x, miR-92a-3p, miR-34c, miR-

miR-181b-5p, miR-200c-3p, miR-28-3p, miR-107, miR-200c, miR-2285af, miR-30c-2-3p, miR-30f, miR-2285b, miR-199a-5p, miR-3064-5p, miR-200b-3p, miR-30c, miR-1290, miR-30a-5p, miR-486-5p, novel\_121, miR-582-3p, miR-429-3p, miR-6517, miR-2285ad, miR-1224-5p, novel\_9, miR-374b-3p, miR-370-5p, miR-410-5p, miR-34c-3p, miR-3969, miR-144, miR-374a-3p, miR-145-3p, miR-28a-3p, let-7e-3p, miR-329b, miR-485-5p, miR-7144-5p, novel\_48, miR-30e-5p, miR-320a, miR-34c-5p, miR-199a-5p, miR-2285aa, miR-466f-3p, miR-660, miR-7-5p, novel\_51, miR-194a, miR-30b-3p, miR-181a-5p, miR-7b-5p, miR-19b-2-5p, miR-145a-5p, miR-194-5p, miR-197-3p, miR-3431, miR-412-5p, miR-2285g, miR-103, novel\_116, miR-103a-3p, miR-31-5p, miR-26b-3p, miR-206, miR-656-5p, miR-576-3p, miR-6402, miR-142b, miR-133a-5p, miR-34c, miR-199b-5p, miR-2428, miR-449a, miR-1193, miR-2285x, miR-107, miR-412-3p, miR-2284e, miR-3591-3p, miR-150-5p, miR-34b, miR-181b-3p, miR-320c, miR-144-3p, miR-669, miR-677, novel\_68, miR-3120-3p, miR-26b-5p, miR-320d, miR-30d, miR-34b-5p, miR-2285p, miR-26a-5p, miR-30b, miR-216a-5p, miR-125b-2-3p, miR-181b-1-3p, miR-376a-5p, miR-29b-1-5p, miR-2424, miR-183-5p, miR-369-3p, miR-4429, miR-148a-5p, miR-34a-5p, miR-361-5p, miR-1246, miR-30c-5p, miR-188-3p, miR-200b, miR-487a-3p, miR-532-3p, miR-212-5p, miR-664a, miR-2285j, miR-320e, miR-655-3p, miR-19b-1-5p, miR-206-3p, miR-181c-5p, miR-433-5p, miR-30f, novel\_99, miR-625-5p, miR-2285c, miR-655, miR-30d-5p, miR-6130, miR-660-5p, miR-548o-3p, miR-30c-1-3p, miR-182-5p, miR-21-3p, miR-370-5p, miR-487b-5p, miR-3085-3p, miR-199b-5p, novel\_103, miR-320b, miR-182-5p, miR-2957, miR-323b-3p, miR-29b-1-5p, miR-30c-1-3p, miR-33a-5p, miR-101a-5p, miR-2426, miR-1388-5p, miR-21b, miR-484, miR-30b-3p, miR-323b, miR-2285e, miR-148b-5p, novel\_78, miR-145b, miR-181b-2-3p, miR-400a-5p, miR-340-3p, novel\_4, miR-10a-5p, miR-10a, miR-10b-5p, miR-484, miR-10b, miR-2904, miR-874-5p, miR-10a-5p, miR-543-5p

HELLS ENSOARGO(helicase)

DHDDS ENSOARGO(dehydrod

miR-874-3p, miR-503-3p, miR-574-5p, miR-487a-3p, miR-615-5p, miR-2355-5p, miR-2285aa, miR-769, miR-154b-5p, miR-301, miR-30e-5p, miR-362-5p, miR-3154, miR-767, miR-10b-3p, miR-1814c, miR-485-5p, miR-7144-5p, novel\_48, miR-23a-5p, miR-2284v, miR-1306-5p, miR-16-5p, miR-3607-3p, miR-500b-5p, miR-2903, novel\_63, miR-2284k, miR-767-5p, miR-204-5p, miR-486b-3p, miR-592, miR-3432a, miR-196a-2-3p, miR-1271-5p, miR-322-5p, miR-505-5p, novel\_121, miR-2284z, miR-615-3p, miR-23b-5p, miR-30a-5p, miR-501-3p, miR-1343-5p, miR-7134-5p, miR-496, miR-4286, miR-2385-3p, miR-24-2-5p, miR-28b, miR-148b-5p, miR-2285b, miR-1957a, miR-29a-5p, miR-376b-3p, miR-2285af, miR-450a-2-3p, novel\_127, miR-3120-3p, miR-655-5p, miR-411b-3p, novel\_69, miR-323a-5p, miR-669, miR-6535, miR-2387, miR-18a-3p, miR-376b-3p, miR-3065-5p, miR-1306, miR-2285k, miR-1291, miR-505-3p, miR-195a-5p, miR-9851-3p, miR-342-3p, miR-24-3p, miR-211, miR-28c, miR-15a, miR-4324, miR-16a, miR-485-3p, novel\_1, miR-147-5p, miR-199c, miR-31-5p, miR-377-5p, miR-134-3p, miR-432-5p, miR-2284d, miR-1843b-5p, miR-432, miR-197-3p, miR-30b-3p, miR-2284ab, miR-16b, miR-2284x, miR-497-5p, miR-26a-2-3p, miR-6240, let-7f-2-3p, let-7f-2-3p, miR-628-5p, miR-363-5p, miR-668-3p, miR-2284l, miR-296-3p, miR-539-3p, miR-296-3p, miR-377-3p, novel\_51, miR-330-3p, miR-2285l, miR-1343-5p, miR-496-3p, miR-221-5p, miR-2331-3p, miR-504-5p, miR-154a-3p, miR-323-5p, miR-216b-5p, miR-139-5p, miR-656-3p, miR-6130, miR-582-5p, miR-377-3p, miR-499b-3p, miR-151b, miR-15b-5p, miR-21a-3p, miR-30d-5p, miR-27b-5p, miR-129b-3p, miR-154b-3p, miR-582-5p, miR-625-5p, miR-4510, miR-145a-3p, miR-539-5p, miR-214, miR-1271, miR-769-5p, miR-142a-5p, miR-6134, miR-3184-5p, miR-122-5p, miR-487b-5p, miR-129-5p, miR-1468-5p, miR-424-5p, miR-4492, miR-18a-3p, miR-505-3p, miR-485-3p, miR-15a-5p, miR-487a-3p, miR-151-

DLX5

ENSOARGO(distal-1)

miR-308b-3p, miR-491-5p, miR-29b-1-5p, novel\_19, miR-1306-5p, miR-320b, miR-342, miR-3187-3p, miR-8485, miR-744-3p, miR-1388-3p, miR-3120-5p, miR-2426, miR-544a, miR-30b-3p, miR-7857, miR-541, miR-143-5p, miR-2284r, miR-376b-3p, miR-181b-2-3p, miR-1343-3p, miR-2300a-5p, miR-2284q, miR-490-5p, miR-769-5p, miR-2440, miR-423-5p, miR-877-3p, miR-9-5p, miR-541-3p, novel\_94, miR-376a-3p, miR-504, miR-376d, miR-4443, miR-378g, miR-211-5p, miR-7977, miR-2319b, miR-2284g, miR-3064-5p, miR-34b-5p, miR-760-3p, miR-320d, miR-125b, miR-185-3p, miR-486-3p, miR-181b-1-3p, miR-29b-1-5p, miR-378d, miR-2284u, miR-34a-5p, miR-664-5p, miR-133a-3p, miR-218-1-3p, miR-4429, miR-5703, miR-2408, miR-2300b-3p, miR-328-3p, miR-2284h-5p, novel\_83, miR-3600, miR-18a-3p, miR-130b-5p, miR-129-5p, miR-4492, miR-17-3p, miR-664a, miR-665, miR-132-5p, miR-2285j, miR-6134, miR-3184-5p, miR-6525, miR-769-5p, miR-4510, miR-129b-3p, miR-6130, miR-544-3p, miR-132-5p, miR-377-3p, miR-545-3p, miR-504-5p, miR-2331-3p, miR-125a-5p, miR-378a-5p, miR-483-3p, novel\_51, miR-377-3p, miR-432-3p, miR-628-5p, miR-130b-5p, miR-744-5p, miR-30b-3p, miR-1285, miR-542-3p, miR-2355-3p, miR-544b, miR-149-5p, miR-134-3p, miR-26b-3p, miR-133b-5p, miR-340-3p, miR-6123, miR-128-1-5p, miR-34c, miR-449a, miR-211, miR-17-3p, miR-342-3p, miR-6395, miR-2319a, miR-1291, miR-376b-3p, miR-18a-3p, miR-3065-5p, miR-216a-3p, miR-378b, miR-1306, miR-2387, miR-181b-3p, miR-677, miR-320c, miR-34b, novel\_69, novel\_68, miR-543-5p, novel\_96, miR-200a-3p, novel\_127, miR-450a-2-3p, miR-2898, miR-17-3p, miR-3071-3p, miR-376b-3p, miR-29a-5p, miR-200a, novel\_39, miR-2284y, miR-148b-5p, miR-2385-3p, miR-3064-5p, miR-128-3p, miR-23b-5p, miR-2427, miR-134, miR-134-5p, miR-582-3p, miR-483-3p, miR-9-5p, miR-204-5p, miR-134-5p, miR-486b-3p, miR-409-3p, miR-321-3p, miR-125b-5p, miR-100-3p, miR-2331-3p, miR-545-3p, miR-499b-3p, miR-300-3p, miR-204-3p, miR-381-3p, miR-320a, miR-433-3p, miR-329a, miR-885-3p, miR-539-5p, miR-1197-3p, miR-338-3p, miR-2285j, miR-3604, miR-100-3p, miR-191-5p, miR-208b-5p, miR-2285ad, miR-18a-3p, miR-505-3p, miR-485-3p, miR-148b-3p, miR-487a-3p, miR-302a-5p, miR-545-5p, miR-362-3p, miR-191, miR-217-5p, miR-188-3p, miR-124-3p, novel\_73, miR-300, miR-4429, miR-885-3p, miR-148a-5p, miR-128-3p, miR-130a-5p, miR-2285b, miR-29a-5p, miR-200a, miR-2285af, miR-181c-3p, miR-217, miR-320d, miR-152-3p, novel\_127, miR-216b-3p, novel\_68, miR-2285u, miR-499a-3p, miR-203-3p, miR-320c, miR-148a-3p, miR-216a-3p, miR-3065-5p, miR-18a-3p, miR-299b-5p, miR-9-3p, miR-505-3p, miR-212-3p, miR-342-3p, miR-2447, miR-495-3p, miR-2285m, miR-576-3p, miR-2285n, miR-485-3p, miR-2285y, miR-147-5p, novel\_78, miR-2300a-5p, novel\_4, miR-26b-3p, miR-148b-5p, miR-216a-3p, miR-329-3p, miR-450b-5p, miR-362-3p, miR-494-3p, miR-124a, miR-574-3p, miR-539-3p, miR-320b, miR-342, miR-362-3p, miR-2957, miR-124-5p, miR-452-5p

PCSK7 ENSOARGO(proprote

PRKAG2 ENSOARGO(protein

miR-2285b, miR-429-3p, miR-505-5p, miR-2284z, novel\_121, miR-129-1-3p, miR-3578, miR-29d-3p, miR-218-2-3p, miR-200b-3p, miR-181a-2-3p, miR-4286, miR-24-2-5p, miR-380-5p, miR-2285b, miR-192-3p, miR-205-5p, miR-200c, miR-664-3p, miR-17-3p, miR-127-5p, miR-1a-2-5p, miR-181b-5p, miR-200c-3p, miR-152-3p, miR-2285aa, miR-374c-3p, miR-300-3p, miR-3965, miR-2284n, miR-2448-3p, miR-23b, miR-376c-5p, miR-767, miR-2318, miR-329b, novel\_48, miR-7144-5p, miR-376c-5p, miR-1306-5p, miR-6128, miR-133a-3p, novel\_63, miR-29b-3p, miR-2284k, miR-1-5p, miR-144, miR-3969, miR-767-5p, miR-130a-3p, miR-2284d, miR-185-5p, miR-194-3p, miR-19b-2-5p, miR-181a-5p, miR-1843b-5p, miR-223-3p, miR-3071-5p, miR-145a-5p, miR-29b, miR-2284ab, miR-7862, miR-27b-3p, miR-380-5p, miR-6240, miR-668-3p, miR-22841, let-7j, miR-503-3p, miR-193a-3p, miR-26b-5p, miR-3120-3p, miR-411b-3p, miR-29a-3p, miR-6535, miR-144-3p, miR-376b-5p, miR-148a-3p, miR-3970, miR-150-5p, miR-378b, miR-2319a, miR-342-3p, miR-1a-1-5p, miR-193b-3p, miR-29c-3p, miR-758-5p, miR-17-3p, miR-301b-3p, miR-29a, miR-3600, miR-380-5p, miR-23b-3p, miR-23c, miR-200b, miR-148b-3p, miR-1246, miR-98-3p, miR-140-3p, novel\_73, miR-216c-5p, miR-125b-2-3p, miR-196a-3p, novel\_17, miR-26a-5p, miR-216a-5p, miR-466i-5p, miR-1277-5p, miR-545-3p, miR-548o-3p, miR-582-5p, miR-301a-3p, miR-193b-3p, miR-139-5p, let-7f-1-3p, miR-655, miR-133b-3p, miR-543-3p, miR-625-5p, miR-129-2-3p, miR-98-3p, miR-181c-5p, let-7b-3p, miR-2285j, miR-19b-1-5p, miR-655-3p, miR-664a-5p, miR-17-3p, miR-487a-5p, miR-454-3p, miR-669a-3p, miR-145b, miR-27a-3p, miR-147a, miR-1298-3p, miR-216a-3p, miR-455-3p, miR-126a-5p, miR-421, miR-6529a, miR-21b, miR-2284aa, miR-1839-5p, miR-1388-3p, miR-494-3p, miR-23a-3p, miR-1b-5p, miR-342, miR-505, miR-130b-3p, miR-130-5p, miR-24-1-5p, miR-664b, miR-2285u, miR-7857-3p, miR-299-3p, miR-452-5p, miR-490-5p, miR-190a-5p, miR-100-3p, miR-190a, miR-2440, miR-133a-5p, miR-190b-5p, miR-376c-5p, miR-200b-3p, miR-450b-5p, miR-376c-5p, miR-376b-5p, miR-200b, miR-299b-3p, miR-6516-5p, miR-6516, miR-429-3p, miR-299a-3p

miR-1, miR-2478, miR-29a-5p, miR-2285af, miR-1260a, miR-200c, miR-219-3p, miR-125a-3p, miR-339a, miR-450a-2-3p, miR-17-3p, miR-200c-3p, miR-6536, novel\_127, miR-200a-3p, miR-299a-3p, miR-429-3p, miR-6517, miR-7641, novel\_79, miR-18b-5p, miR-431, miR-9-5p, miR-378h, miR-483-3p, miR-450a-1-3p, miR-134-5p, miR-2284z, novel\_121, miR-1290, miR-134, miR-23b-5p, miR-200b-3p, let-7a-2-3p, miR-193a-5p, miR-6128, miR-133a-3p, miR-1260b, miR-378c, miR-410-5p, miR-370-5p, miR-409-3p, miR-134-5p, miR-874-3p, miR-2285aa, miR-141-3p, miR-215-5p, miR-488-3p, miR-503-3p, miR-301, miR-18a, miR-345-5p, let-7g-3p, miR-7144-5p, miR-671-5p, miR-130b-5p, miR-493-5p, miR-382, miR-668-3p, miR-101-5p, miR-432-3p, miR-345-5p, let-7a-2-3p, miR-7-5p, miR-483-3p, miR-378a-5p, miR-452-5p, miR-339-5p, miR-2285g, miR-432-5p, miR-412-5p, miR-6238, miR-544b, miR-2355-3p, miR-653, miR-432, miR-873a-5p, miR-2113, miR-7b-5p, miR-223-3p, miR-197-3p, miR-450c-3p, miR-22-3p, novel\_23, miR-30b-3p, miR-1260b, miR-188-5p, miR-7862, miR-17-3p, miR-2285x, miR-1193, miR-24-3p, miR-371b-3p, novel\_27, miR-374c-5p, miR-2428, miR-2284w, miR-502-5p, miR-133a-5p, miR-142b, miR-33a-3p, miR-206, miR-421-5p, miR-625-3p, miR-22-5p, miR-378b, miR-216b-3p, miR-655-5p, miR-320b, miR-26b-5p, miR-299b-3p, miR-2285ab, miR-18b, miR-3970, miR-150-5p, miR-18a-3p, miR-410-5p, miR-450b-3p, miR-6516-3p, miR-378f, miR-216c-5p, miR-2285w, miR-29b-1-5p, miR-142a-3p, miR-130a-5p, miR-26a-5p, miR-2285p, miR-219b-5p, miR-422a, miR-202-5p, miR-21-3p, miR-299-3p, miR-18a-3p, miR-548e-3p, miR-3600, miR-1b-3p, miR-7859, miR-200b, miR-222-5p, miR-199a-3p, miR-616-3p, miR-2284h-5p, miR-378i, miR-1246, miR-215-5p, miR-376a-5p, miR-124-3p, miR-1197-5p, miR-378a-3p, miR-188-3p, miR-1434-5p, miR-140-3p, miR-493-3p, miR-142-3p, miR-378c, miR-3058-5p, miR-214, miR-3074-2-3p, miR-378d, miR-654-3p, miR-3187-3p, miR-1388-3p, miR-5100, miR-422a, miR-378h, miR-544b, miR-31-5p, miR-30d-3p, miR-378c, miR-1388-5p, miR-544a, miR-19b-3p, miR-378i, novel\_133, miR-378b, miR-3578, miR-1197-5p, miR-378a-3p, miR-378c, miR-3059-5p, miR-378c, miR-3074-2-3p, miR-452-5p, miR-502b, miR-30e-3p, miR-30a-3p, miR-544-3p, miR-378e, miR-378a-3p, miR-19a-3p, miR-378f

C1R

ENSOARGOC compleme

AFF1

ENSOARGOC AF4/FMR2

CINP ENSOARGO(cyclin-d

miR-181d-5p, miR-2447, miR-361-3p, miR-154-3p, miR-1843a-3p, miR-450a-5p, miR-211-5p, miR-664b, miR-376d, miR-378g, miR-3596, miR-199b-5p, miR-1983, miR-376a-3p, miR-668-5p, miR-494-3p, miR-424-5p, miR-127-3p, miR-382-3p, miR-8485, miR-16b, miR-29b-1-5p, miR-214-3p, miR-199b-5p, miR-130b-3p, miR-3955-3p, novel\_78, miR-2459, miR-148b-5p, miR-376b-3p, miR-1a-3p, miR-412-3p, miR-484, miR-3120-5p, miR-1388-5p, miR-3074-2-3p, miR-214, miR-145a-3p, miR-590-3p, miR-181c-5p, miR-206-3p, miR-2285j, miR-424-5p, miR-454-3p, miR-874-5p, miR-4492, miR-664a, miR-552-3p, miR-154a-3p, miR-370-5p, miR-3065-3p, miR-15b-5p, novel\_32, novel\_25, miR-204-3p, miR-129b-3p, miR-1895, miR-154b-3p, miR-345-3p, miR-487a, miR-2432, miR-2424, miR-130a-5p, miR-29b-1-5p, miR-92a-1-5p, miR-21-3p, miR-485-3p, miR-3600, miR-548e-3p, novel\_83, miR-15a-5p, miR-487a-3p, miR-7859, miR-1197-5p, miR-140-3p, novel\_133, miR-148a-5p, miR-493-3p, novel\_101, miR-1193, miR-301b-3p, miR-199b-5p, miR-374c-5p, miR-24-3p, miR-323c, miR-211, miR-33a-3p, miR-16a, miR-6402, miR-15a, miR-656-5p, miR-22-5p, miR-206, miR-7-1-3p, miR-144-3p, miR-378b, miR-376b-3p, miR-3065-5p, miR-216a-3p, miR-195a-5p, miR-412-3p, miR-1291, miR-539-3p, miR-2331-5p, miR-7-5p, miR-466f-3p, miR-452-5p, miR-1343-5p, miR-130a-3p, miR-149-5p, miR-3431, miR-134-3p, miR-412-5p, miR-3071-5p, miR-7b-5p, miR-1434-3p, miR-181a-5p, miR-744-5p, miR-497-5p, miR-138, miR-16b, miR-16-5p, miR-1197-3p, miR-144, miR-370-5p, miR-2433, miR-204-5p, miR-138-5p, miR-1271, miR-615-5p, miR-370-3p, miR-487a-3p, miR-199a-5p, miR-485-5p, miR-671-5p, miR-181a-2-3p, miR-1, miR-490-3p, miR-450c-5p, miR-199a-5p, miR-3065-3p, miR-664-3p, miR-376b-3p, miR-543-5p, miR-181b-5p, miR-412, novel\_121, miR-214-5p, miR-322-5p, miR-1343-5p, miR-1290, miR-128-3p

novel\_87, miR-62b-3p, miR-199b-5p, miR-150-5p, miR-3591-3p, miR-216a-3p, miR-3065-5p, miR-3141, miR-146b-5p, miR-26b-5p, miR-3120-3p, miR-669, miR-365b-5p, miR-3141, novel\_51, miR-7-5p, miR-146a, miR-296-3p, let-7a-2-3p, miR-450c-3p, miR-22-3p, miR-197-3p, novel\_23, miR-7b-5p, miR-542-3p, miR-497-5p, miR-4508, miR-2284x, miR-16b, miR-16-1-3p, miR-31-5p, miR-3955-5p, miR-103a-3p, miR-149-5p, miR-3535, miR-592, miR-16-5p, miR-23b, miR-345-5p, miR-2355-5p, miR-3956, miR-3068-3p, miR-223-5p, miR-205-5p, miR-664-3p, novel\_127, novel\_96, miR-127-5p, miR-3064-5p, miR-192-3p, miR-148b-5p, miR-1343-5p, miR-330-5p, miR-1290, miR-18b-5p, miR-429-3p, miR-450a-1-3p, miR-322-5p, miR-505-5p, miR-218-5p, miR-101-3p, miR-499a-5p, miR-2447, miR-423-5p, miR-7705, miR-361-3p, miR-877-3p, novel\_111, miR-140-5p, miR-409-5p, miR-335-3p, miR-544-5p, miR-96-5p, miR-668-5p, miR-2285u, miR-7689-3p, miR-139-5p, miR-4792, miR-2319b, miR-203-3p, miR-16b, miR-146b, miR-199b-5p, miR-103a-2-5p, miR-491-5p, miR-487b-5p, miR-23a-3p, miR-1388-3p, miR-8485, miR-2310, miR-541, miR-101c, miR-21b, miR-1388-5p, miR-145b, miR-455-3p, miR-2459, miR-147a, miR-142-5p, miR-665, miR-664a-5p, miR-4492, miR-874-5p, miR-669a-3p, miR-130b-5p, novel\_74, miR-487b-5p, miR-665-5p, miR-3184-5p, miR-181c-5p, miR-6525, miR-769-5p, miR-142a-5p, miR-433-3p, miR-450a-1-3p, miR-625-5p, miR-186-5p, miR-1827, miR-345-5p, miR-296-3p, miR-30c-1-3p, miR-548o-3p, miR-151b, miR-15b-5p, miR-500a-5p, miR-324-3p, miR-92a-1-5p, miR-26a-5p, novel\_17, miR-210-5p, miR-2484, miR-664b-3p, miR-2366, miR-16-1-3p, miR-34a-5p, miR-142-3p, miR-18a-3p, miR-328-3p, miR-7859, miR-23b-3p, miR-23c, miR-34c, miR-16a, miR-15a, miR-502-5p, miR-502b, novel\_101, miR-2285x, miR-1193, miR-135a-2-3p, novel\_27, miR-149a, miR-326-3p, miR-3050-3p, miR-323c, miR-



miR-30c-1-3p, miR-8485, miR-124a, miR-744-3p, let-7c-3p, miR-2426, miR-1388-5p, miR-101c, miR-541, miR-6529a, miR-125b-2-3p, miR-30b-3p, miR-147a, miR-153, miR-1185-3p, miR-455-3p, miR-216a-3p, miR-148b-5p, novel\_4, miR-1343-3p, miR-2300a-5p, miR-330-3p, miR-27a-3p, miR-145b, miR-3968, miR-2284q, miR-490-5p, miR-218-5p, miR-769-5p, miR-154a, miR-363-3p, miR-541-3p, miR-2447, miR-4454, miR-504, miR-136-5p, miR-544-5p, miR-493-5p, miR-361-3p, miR-25, miR-378g, miR-3596, miR-27a-3p, miR-1185-2-3p, miR-20a-3p, miR-10b, miR-24-1-5p, miR-139-5p, miR-4792, miR-7977, miR-211-5p, miR-21-3p, miR-2484, miR-221-5p, miR-210-5p, novel\_17, miR-196a-3p, miR-345-3p, miR-125b, miR-219b-5p, miR-29b-1-5p, miR-486-3p, miR-2285w, miR-345-3p, miR-19b-3p, miR-148a-5p, miR-16-1-3p, miR-218-1-3p, miR-2300b-3p, miR-2366, miR-1197-5p, miR-5703, miR-124-3p, miR-2284h-5p, miR-3600, miR-17-3p, miR-6516-3p, miR-155-5p, miR-664a, miR-450b-3p, miR-500, let-7b-3p, miR-338-5p, miR-664a-5p, miR-665, miR-206-3p, miR-6525, miR-769-5p, miR-4510, miR-3074-5p, miR-433-5p, miR-425-5p, miR-665-5p, let-7g-3p, miR-133b-3p, miR-582-5p, novel\_99, let-7f-1-3p, miR-450a-1-3p, miR-21a-3p, miR-487b-5p, miR-411, miR-500a-3p, miR-6130, miR-139-5p, miR-582-5p, miR-27a-5p, miR-155-5p, miR-204-3p, miR-496-3p, miR-30c-1-3p, miR-504-5p, miR-221-5p, miR-32-5p, miR-532-5p, miR-1343-5p, miR-125a-5p, miR-7-5p, miR-2411-3p, novel\_51, miR-330-3p, miR-32, miR-654-3p, miR-6240, miR-493-5p, let-7f-2-3p, let-7f-2-3p, miR-1260b, miR-16-1-3p, miR-30b-3p, miR-27b-3p, miR-7b-5p, miR-1285, miR-3071-5p, miR-145a-5p, miR-450c-3p, miR-197-3p, miR-185-5p, miR-134-3p, miR-412-5p, miR-2355-3p, miR-149-5p, miR-26b-3p, miR-206, miR-6119-3p, miR-92a-3p, miR-22-5p, miR-133a-5p, miR-1247-3p, novel\_87, miR-24-3p, miR-211, miR-2428, miR-17-miR-1468-5p, miR-129-5p, miR-138-5p, miR-33a-3p, miR-219b-3p, miR-2332, miR-2285j, let-7b-3p, miR-219a-2-3p, miR-2285m, miR-98-3p, miR-2285x, miR-3059-5p, miR-129b-5p, let-7f-1-3p, miR-30e-5p, miR-1185-2-3p, miR-27a-3p, miR-1468, miR-219-3p, miR-2285af, miR-8485, miR-193a, let-7a-3p, miR-27b-3p, miR-450b-5p, miR-138, miR-30a-5p, miR-98-3p, miR-1185-3p, miR-2284h-5p, miR-27a-3p, miR-329a-5p, miR-30c-1-3p, miR-2285b, miR-29a-5p, novel\_17, miR-182-5p, miR-3071-3p, miR-505, miR-30c-2-3p, miR-216a-5p, miR-383-5p, miR-134-5p, miR-134, miR-215-5p, miR-188-3p, miR-3071-5p, miR-5703, miR-885-5p, miR-539-5p, miR-452-5p, miR-6128, miR-769-5p, miR-2284w, miR-338-3p, novel\_27, miR-133a-5p, miR-5100, miR-4324, miR-769-5p, miR-3968, miR-134-5p, miR-329-5p, miR-30c-1-3p, miR-215-5p, miR-182-5p, miR-656-3p, miR-769, miR-3082-5p, miR-192-5p, miR-154b-5p, miR-3154, miR-136-5p

miR-339-5p, miR-66b, miR-133b-5p, miR-103a-3p, miR-31-5p, miR-20b, miR-103, miR-194-3p, miR-3431, miR-412-5p, miR-374b-3p, miR-197-3p, miR-1285, miR-223-3p, miR-873a-5p, miR-7862, miR-27b-3p, miR-497-5p, miR-30b-3p, miR-16b, miR-628-5p, miR-382, miR-6240, miR-130b-5p, miR-539-3p, miR-17-5p, miR-106a-5p, miR-136-3p, miR-2411-3p, miR-330-3p, miR-105-5p, miR-193a-3p, miR-125a-5p, miR-106b-3p, miR-26b-5p, miR-10a-5p, miR-3074-5p, novel\_68, miR-669, miR-677, miR-670-3p, miR-2404, miR-3065-5p, miR-18a-3p, miR-216a-3p, miR-3970, miR-195a-5p, miR-9851-3p, miR-412-3p, miR-19a-3p, miR-107, miR-2284e, miR-1291, miR-495-3p, miR-17-3p, miR-193b-3p, miR-326-3p, miR-1307-3p, novel\_87, miR-425-5p, miR-2284o, miR-16a, miR-20a-5p, miR-133a-5p, miR-15a, novel\_1, novel\_79, miR-7641, miR-429-3p, miR-2285ad, miR-6516-5p, miR-1271-5p, miR-322-5p, miR-23b-5p, miR-330-5p, miR-1290, miR-345-3p, miR-10a-5p, miR-128-3p, miR-200b-3p, miR-300, miR-2284f, miR-2385-3p, miR-1271-3p, miR-200a, miR-380-5p, miR-339a, miR-664-3p, miR-200c, miR-2285af, novel\_127, miR-107, miR-200c-3p, miR-17-3p, miR-125a, miR-2285aa, miR-487a-3p, miR-374c-3p, miR-23b, miR-17-5p, miR-93-5p, miR-2448-3p, miR-381-3p, miR-1814c, miR-7144-5p, miR-20b-5p, miR-329a, miR-329b, miR-133a-3p, miR-16-5p, miR-1306-5p, miR-93, miR-323-3p, miR-3969, miR-125b-5p, miR-410-5p, miR-28-5p, miR-27a-3p, novel\_78, novel\_4, miR-330-3p, miR-2459, miR-216a-3p, miR-142-5p, miR-1298-3p, miR-147a, miR-30b-3p, miR-758-3p, miR-323b, miR-301b-5p, miR-10b, miR-329-3p, miR-296-5p, miR-2284r, miR-484, miR-3120-5p, miR-101c, miR-2426, miR-450b-5p, miR-362-3p, miR-744-3p, miR-23a-3p, miR-106a-5p, miR-424-5p, miR-124a, miR-574-3p, miR-758-3p, miR-2310, miR-8485, miR-16b, miR-106b-5p, miR-505, miR-323b-3p, miR-362-3p, miR-326, miR-199a-3p, miR-214-3p, miR-7689-3p, miR-152-3p, miR-10b, miR-664b, miR-27a-3p, miR-3604, miR-486b-3p, miR-204-5p, miR-500, miR-410-3p, miR-1260b, miR-142a-5p, miR-3154, miR-320a, miR-500a-3p, miR-129b-3p, miR-876-3p, miR-141-3p, miR-376e-3p, miR-544-3p, miR-376c-3p, novel\_17, miR-1260a, miR-345-3p, miR-320d, miR-200a-3p, miR-3529-3p, miR-329a-5p, miR-181a-2-3p, miR-376c-3p, miR-143-3p, novel\_39, miR-486-3p, miR-3578, miR-345-3p, miR-5703, miR-140-3p, miR-124-3p, miR-582-3p, miR-4429, miR-105-2, miR-16-1-3p, miR-222-5p, miR-486-5p, miR-199a-3p, miR-2284z, miR-532-3p, novel\_1, miR-499a-5p, miR-211, miR-2428, miR-3065-5p, miR-877-3p, miR-329-5p, miR-452-3p, miR-20a-3p, miR-211-5p, miR-499b-5p, miR-320b, miR-320c, novel\_115, miR-320b, miR-199a-3p, miR-2411-3p, miR-105-5p, miR-3955-3p, miR-124-5p, miR-124a, miR-652-5p, miR-628-5p, miR-432-3p, miR-432-3p, miR-193a, miR-542-3p, novel\_23, miR-3071-5p, miR-30b-3p, miR-101a-5p, miR-16-1-3p, miR-544a, miR-1260b, miR-219a-1-3p, miR-30b-3p, miR-1388-5p, miR-101c, miR-2284aa, miR-2300a-5p, miR-105-1, miR-142-5p, miR-544b, miR-455-3p, miR-9788-3p

NKIRAS1 ENSOARGO(NFKB inh

UBE2E1 ENSOARGO(ubiquiti

miR-125a, miR-1271, miR-2355-5p, miR-370-3p, miR-2285aa, miR-3957-5p, miR-3957, miR-17-5p, miR-93-5p, miR-671-5p, miR-1814c, miR-20b-5p, miR-23a-5p, miR-193a-5p, novel\_42, miR-93, miR-331-3p, miR-125b-5p, miR-2433, miR-29b-3p, miR-412, miR-2285ad, novel\_121, miR-129-1-3p, miR-483-3p, miR-302a-5p, miR-29d-3p, miR-4286, miR-3064-5p, novel\_39, miR-3065-3p, miR-30c-2-3p, miR-205-5p, miR-2898, miR-320b, novel\_68, miR-29a-3p, miR-3141, miR-450b-3p, miR-1291, miR-29c-3p, miR-335-5p, miR-135a-2-3p, miR-2428, miR-371b-3p, miR-20a-5p, miR-4324, miR-29a, miR-26b-3p, miR-133b-5p, miR-20b, miR-149-5p, miR-22-3p, miR-1285, miR-873a-5p, miR-2284x, miR-29b, miR-363-5p, miR-130b-5p, novel\_51, miR-17-5p, miR-106a-5p, miR-3141, miR-125a-5p, miR-483-3p, miR-296-3p, miR-3065-3p, miR-548c-3p, miR-30c-1-3p, miR-22-3p, novel\_32, miR-216b-5p, miR-132-5p, miR-499b-3p, novel\_99, miR-214, miR-129-2-3p, miR-433-5p, miR-6134, miR-346, miR-665, miR-19b-1-5p, miR-130b-5p, miR-874-5p, miR-4492, miR-1468-5p, miR-664a, miR-1b-3p, miR-106a, miR-532-3p, miR-2300b-3p, miR-378d, miR-184-3p, miR-345-3p, miR-20a, miR-143-3p, miR-376a-5p, miR-125b, miR-92a-1-5p, miR-185-3p, miR-219b-5p, miR-324-3p, miR-2285p, miR-760-3p, miR-106a, miR-7977, miR-2285u, miR-3064-5p, miR-489, miR-499a-3p, miR-140-5p, miR-3956-3p, novel\_60, miR-3059-5p, miR-361-3p, miR-2285y, miR-335, miR-3968, miR-2300a-5p, novel\_4, miR-412-3p, miR-2284r, miR-106a-5p, miR-2310, miR-30c-1-3p, miR-106b-5p, novel\_19, miR-1468, miR-214-3p, miR-3085-3p

miR-371a-5p, miR-107-5p, miR-4726-5p, miR-450a-5p, miR-2285f, miR-181d-5p, novel\_60, miR-212-3p, miR-361-3p, miR-199b-5p, miR-877-3p, miR-499b-5p, miR-541-5p, miR-7977, miR-452-3p, miR-20a-3p, miR-378e, miR-489, miR-3082-5p, miR-320b, miR-326, miR-1306-5p, miR-1468, miR-33a-5p, miR-494-3p, miR-3187-3p, miR-758-3p, miR-30c-1-3p, miR-412-3p, miR-30b-3p, miR-378b, miR-484, miR-143-5p, miR-10b, miR-3120-5p, miR-378c, miR-450b-5p, miR-2426, novel\_4, miR-2300a-5p, miR-409b, miR-151a-3p, miR-221-3p, miR-2285e, miR-19b-1-5p, miR-222-3p, miR-17-3p, miR-6516-3p, miR-664a, miR-539-5p, miR-378c, miR-145a-3p, miR-4510, miR-6134, miR-338-3p, miR-10b-5p, miR-206-3p, miR-27b-5p, novel\_99, miR-2312, miR-18a-5p, miR-182-5p, miR-140-5p, miR-378a-3p, miR-660-5p, miR-22-3p, novel\_32, miR-204-3p, miR-6130, miR-193b-3p, miR-216a-5p, miR-185-3p, miR-34b-5p, miR-299-3p, miR-2284m, miR-320d, miR-466i-5p, miR-125b-2-3p, miR-124-3p, miR-1197-5p, miR-5703, novel\_133, miR-376a-5p, miR-2300b-3p, miR-4429, miR-3600, miR-199a-3p, miR-222-5p, miR-34c, miR-133a-5p, miR-656-5p, miR-203b-5p, novel\_101, miR-17-3p, miR-135a-2-3p, novel\_27, miR-326-3p, miR-449a, miR-2428, miR-211, miR-24-3p, miR-2285ab, miR-18b, miR-7975, miR-9851-3p, miR-6395, miR-376a-2-5p, miR-7-1-3p, miR-10a-5p, miR-670-3p, miR-34b, miR-224-5p, miR-660, miR-130b-5p, miR-345-5p, miR-374b-3p, miR-3071-5p, miR-145a-5p, miR-181a-5p, miR-6239, miR-30b-3p, miR-2284ab, miR-377-5p, miR-2355-3p, miR-432-5p, miR-2285g, miR-185-5p, miR-331-3p, miR-3969, miR-5100, miR-204-5p, miR-486b-3p, miR-3607-3p, miR-378c, miR-145-3p, miR-18a, miR-320a, miR-3154, miR-7144-5p, miR-3074-1-3p, miR-23a-5p, miR-1814c, miR-671-5p, miR-10b-3p, miR-370-3p, miR-3957-5p, miR-199a-5p, miR-3957, miR-2284n, miR-34c-5p, miR-30c-2-3p, miR-543-5p, miR-150a-2-3p, miR-17-3p, miR-181b-5p, miR-199a-5p, miR-190-

EEFSEC ENSOARGO( eukaryot

miR-378e, miR-1185-2-3p, miR-452-3p, miR-3064-5p, miR-499b-5p, miR-136-5p, miR-504, miR-3963, miR-361-3p, miR-3956-3p, novel\_60, miR-6527, miR-4726-5p, miR-615, miR-769-5p, miR-1185-3p, miR-216a-3p, novel\_78, miR-1343-3p, novel\_4, miR-181b-2-3p, miR-378c, miR-362-3p, miR-378b, miR-2284r, miR-329-3p, miR-296-5p, miR-484, miR-378d, miR-8485, miR-4532, miR-127-3p, miR-1388-3p, miR-124a, miR-3085-3p, miR-491-5p, miR-326, miR-5126, miR-362-3p, miR-193b-3p, miR-2284s, miR-2331-3p, miR-504-5p, miR-378a-3p, miR-532-5p, miR-216b-3p, miR-3065-3p, miR-345-5p, miR-1827, miR-1895, miR-224-5p, miR-6525, miR-769-5p, miR-338-3p, miR-378c, miR-425-5p, miR-665, miR-324-3p, miR-328-3p, miR-1247-5p, miR-532-3p, miR-361-5p, miR-34a-5p, miR-378d, miR-362-3p, miR-378i, miR-378a-3p, miR-2904, miR-124-3p, miR-181b-1-3p, miR-125b-2-3p, miR-503-5p, miR-760-3p, miR-34b-5p, miR-422a, miR-125b, miR-185-3p, miR-92a-1-5p, novel\_69, miR-34b, miR-181b-3p, miR-669, miR-677, novel\_68, miR-1291, miR-378f, miR-6395, miR-9851-3p, miR-2387, miR-371b-3p, miR-449a, miR-326-3p, miR-193b-3p, miR-379-3p, miR-128-1-5p, miR-6123, miR-34c, miR-185-5p, miR-503-5p, miR-149-5p, miR-194-3p, miR-122-3p, miR-744-5p, miR-2889, miR-4508, miR-1285, miR-7b-5p, miR-345-5p, let-7f-2-3p, let-7f-2-3p, miR-363-5p, miR-483-3p, miR-193a-3p, miR-125a-5p, miR-106b-3p, miR-503-5p, miR-7-5p, miR-224-5p, miR-769, miR-34c-5p, miR-3957, miR-3957-5p, miR-574-5p, miR-125a, miR-1271, miR-2355-5p, miR-329a, miR-345-5p, miR-876-3p, miR-1197-3p, miR-378c, novel\_42, miR-2433, miR-331-3p, miR-125b-5p, miR-378h, miR-483-3p, miR-505-5p, miR-6517, miR-2285ad, miR-7641, miR-196a-2-3p, miR-1224-5p, miR-411-3p, miR-615-3p, miR-330-5p, miR-3065-3p, miR-3064-5p, miR-127-5p, miR-191-3p, miR-2898, novel\_96

miR-130b-5p, miR-296-3p, let-7j, miR-34b-5p, miR-194a, novel\_51, miR-2411-3p, miR-503-5p, miR-377-3p, miR-296-3p, miR-125a-5p, miR-466f-3p, miR-483-3p, miR-378a-5p, miR-187-3p, miR-122-3p, miR-103a-3p, miR-149-5p, miR-103, miR-2355-3p, miR-432-5p, miR-503-5p, miR-134-3p, miR-450c-3p, miR-22-3p, miR-374b-3p, miR-194-5p, miR-432, miR-1843b-5p, miR-497-5p, miR-16b, miR-138, miR-29b, miR-1260b, miR-3957-3p, novel\_101, miR-17-3p, miR-29c-3p, miR-342-3p, miR-326-3p, miR-2284w, miR-199b-5p, miR-2428, miR-24-3p, miR-371b-3p, miR-1307-5p, miR-16a, novel\_87, miR-15a, miR-576-3p, miR-6529b, miR-203b-5p, miR-502b, miR-6119-3p, miR-128-1-5p, miR-29a, novel\_1, miR-216b-3p, miR-3074-5p, miR-320c, miR-669, miR-677, miR-181b-3p, miR-323a-5p, miR-670-3p, miR-374c-3p, miR-29a-3p, miR-1306, miR-18a-3p, miR-216a-3p, miR-195a-5p, miR-107, miR-412-3p, miR-3064-5p, novel\_39, miR-199a-5p, miR-376c-5p, miR-376b-5p, miR-3065-3p, miR-490-3p, miR-205-5p, miR-1260a, miR-125a-3p, miR-6119-5p, miR-107, novel\_127, novel\_96, miR-17-3p, miR-191-3p, miR-127-5p, miR-6517, miR-450a-1-3p, miR-214-5p, miR-322-5p, miR-483-3p, miR-29d-3p, miR-23b-5p, miR-330-5p, miR-345-3p, miR-3578, miR-128-3p, miR-6128, miR-16-5p, miR-181a-2-3p, miR-1260b, miR-26c, miR-331-3p, miR-125b-5p, miR-29b-3p, miR-486b-3p, miR-592, miR-138-5p, miR-615-5p, miR-125a, miR-874-3p, miR-199a-5p, miR-154b-5p, miR-374c-3p, miR-200a-5p, miR-3154, miR-320a, miR-671-5p, miR-485-5p, miR-1248, miR-345-5p, miR-744-3p, miR-33a-5p, miR-424-5p, miR-382-3p, miR-8485, miR-182-5p, miR-16b, miR-342, miR-320b, miR-1306-5p, miR-326, miR-199b-5p, miR-214-3p, miR-491-5p, miR-3085-3p, miR-181b-2-3p, miR-1343-3p, miR-148b-5p, miR-216a-3p, miR-1298-3p, miR-484, miR-2426, miR-190b-5p, miR-194b-5p, miR-2447, miR-3059-5p, miR-212-3p, miR-423-5p, miR-877-3p, miR-361-3p, miR-382-3p, miR-

miR-7-5p, miR-194a, miR-196b-5p, miR-124-5p, miR-493-5p, miR-380-5p, miR-668-3p, miR-7b-5p, miR-1434-3p, miR-653, miR-873a-5p, novel\_23, miR-194-5p, miR-219a-1-3p, miR-16-1-3p, miR-7862, miR-3955-5p, miR-339-5p, miR-665, miR-185-5p, miR-412-5p, miR-6238, miR-149-5p, miR-502-5p, novel\_87, novel\_1, miR-22-5p, miR-342-3p, miR-3957-3p, miR-2428, miR-326-3p, miR-148a-3p, miR-376b-5p, miR-412-3p, miR-6395, miR-505-3p, miR-3074-5p, miR-10a-5p, miR-323a-5p, miR-339a, miR-3071-3p, miR-127-5p, miR-152-3p, miR-200a-3p, miR-3529-3p, miR-4286, miR-30a-3p, miR-380-5p, miR-148b-5p, miR-2478, miR-2285b, miR-2284a, miR-29a-5p, miR-196a-5p, miR-330-5p, miR-10a-5p, novel\_79, miR-24-2-5p, miR-486-5p, miR-2332, miR-331-3p, miR-2448-3p, miR-3154, miR-1814c, miR-1248, miR-7144-5p, miR-376c-5p, miR-141-3p, miR-2355-5p, miR-365a-3p, miR-223-5p, miR-326, miR-342, miR-199a-3p, miR-505, miR-2957, miR-1185-5p, miR-214-3p, miR-494-3p, miR-2284b, miR-2310, miR-541, miR-10b, miR-16-2-3p, miR-151a-3p, miR-2300a-5p, miR-148b-5p, miR-216a-3p, miR-218-5p, miR-490-5p, miR-541-3p, miR-2447, miR-194b-5p, miR-9-3p, miR-361-3p, miR-504, miR-3963, miR-299b-5p, miR-1983, miR-9-3p, miR-493-5p, miR-7977, miR-3082-5p, miR-203-3p, miR-105-3p, miR-345-3p, miR-195a-3p, novel\_133, miR-5703, miR-2904, miR-493-3p, miR-2284u, miR-148a-5p, miR-16-1-3p, miR-505-3p, miR-30d-3p, miR-148b-3p, miR-328-3p, miR-199a-3p, miR-30e-3p, miR-151-3p, miR-30a-3p, miR-208b-5p, miR-4492, miR-3074-5p, miR-214, miR-10b-5p, miR-339b, let-7g-3p, miR-186-5p, miR-545-3p, miR-504-5p, miR-216b-5p, miR-323-5p, miR-10a, miR-204-3p, miR-134-3p, miR-340-3p, miR-199b-3p, miR-6517, miR-30b-3p, miR-296-5p, miR-542-3p, miR-541, miR-2113, miR-30b-3p, miR-296-3p, miR-8485, miR-486-3p, miR-101b-3p, miR-363-5p, miR-1185-5p, miR-466f-3p, miR-342, novel\_17, miR-377-3p, miR-296-3p, miR-185-3p, miR-92a-1-5p, miR-378g, miR-377-3p, miR-139-5p, novel\_32, miR-669, miR-139-5p, miR-541-5p, miR-2355-5p, miR-625-5p, miR-9851-3p, miR-1827, miR-1248, miR-361-3p, miR-150-5p, miR-206-3p, miR-8095, miR-342-3p, miR-541-3p, miR-206, miR-4492, miR-656-5p, miR-22-5p, miR-199c, miR-486b-3p, miR-147-5p, miR-34c-3p

SLC1A6 ENSOARGOC solute c.

GDI1 ENSOARGOC GDP diss.

miR-450c-5p, miR-3071-3p, miR-664-3p, novel\_96, novel\_127, miR-127-5p, novel\_79, miR-431, miR-2285ad, miR-23b-5p, miR-3591-5p, miR-1290, miR-2284v, miR-1260b, miR-2284k, miR-592, miR-331-5p, miR-300-3p, miR-331-5p, miR-3959-5p, miR-331-5p, miR-767, miR-329a, miR-345-5p, miR-668-3p, let-7f-2-3p, let-7f-2-3p, miR-380-5p, miR-2411-3p, novel\_51, miR-296-3p, miR-378a-5p, miR-339-5p, miR-149-5p, novel\_116, miR-3431, miR-22-3p, novel\_23, miR-432, miR-542-3p, miR-26a-2-3p, miR-188-5p, miR-2284x, miR-29c-3p, miR-485-3p, novel\_87, miR-142b, miR-576-3p, miR-6123, miR-29a, miR-3074-5p, miR-6535, miR-677, miR-181b-3p, miR-2319a, miR-412-3p, miR-486-3p, miR-143-3p, miR-181b-1-3p, miR-324-3p, miR-500a-5p, miR-345-3p, miR-3653-3p, miR-18a-3p, miR-1434-5p, miR-193b-5p, miR-133a-3p, novel\_73, miR-3184-3p, miR-3074-5p, miR-181c-5p, miR-6525, miR-142a-5p, miR-665, let-7b-3p, miR-874-5p, miR-4492, miR-130b-5p, novel\_74, miR-30c-1-3p, miR-582-5p, miR-129b-3p, miR-433-3p, miR-625-5p, miR-1827, miR-339b, miR-345-5p, miR-1388-3p, miR-323b-3p, miR-29b-1-5p, miR-431-5p, miR-153-3p, miR-103a-2-5p, miR-491-5p, miR-181b-2-3p, novel\_78, miR-148b-5p, miR-455-3p, miR-2459, miR-1185-3p, miR-153, miR-425-3p, miR-142-5p, miR-323b, miR-758-3p, miR-329-3p, miR-301b-5p, miR-1388-5p, miR-362-3p, miR-2284j, miR-877-3p, miR-361-3p, miR-301a-5p, novel\_82, miR-218-5p, miR-211-5p, miR-2319b, miR-203-3p, miR-4443, miR-1185-2-3p, miR-3596, miR-381-3p, miR-9-3p, miR-544-5p, miR-1983, miR-96-5p, miR-29b-2-5p, miR-4286, miR-2403, miR-1957a, miR-3065-3p, miR-490-3p, miR-380-5p, miR-30c-2-3p, miR-339a, miR-1260a, miR-450a-2-3p, miR-2898, miR-181b-5p, miR-7641, miR-302a-5p, miR-6516-5p, miR-1271-5p, miR-29d-3p, miR-345-3p, miR-6128, miR-145-3p, miR-500b-5p, miR-409-3p, miR-29b-3p, miR-135a-1-3p, miR-486b-3p, miR-204-5p, miR-767-5p, miR-



miR-299a-5p, miR-101a-5p, miR-101c, miR-2284aa, miR-16-2-3p, miR-301b-5p, miR-4791, miR-541, miR-1a-3p, miR-142-3p, miR-1298-3p, miR-1185-3p, miR-2285e, novel\_78, miR-3955-3p, miR-1468, miR-8485, miR-494-3p, miR-1388-3p, miR-33a-5p, miR-1983, novel\_94, miR-335-3p, miR-2483-3p, miR-7857-3p, miR-499a-3p, miR-1185-2-3p, miR-10b, miR-335, miR-101-3p, novel\_82, miR-301a-5p, miR-154a, miR-541-3p, miR-194b-5p, miR-2285f, miR-378d, miR-2300b-3p, novel\_133, miR-188-3p, miR-5703, miR-148b-3p, miR-340-5p, miR-210-3p, miR-532-3p, miR-1247-5p, novel\_83, miR-466i-5p, miR-21-3p, miR-1277-5p, miR-210-5p, miR-92a-1-5p, miR-142a-3p, miR-130a-5p, miR-664b-3p, miR-2411, let-7g-3p, miR-2312, miR-582-5p, miR-450a-1-3p, miR-2285c, miR-21a-3p, miR-433-3p, miR-129b-3p, miR-499b-3p, miR-582-5p, miR-155-5p, miR-660-5p, miR-296-3p, miR-155-5p, miR-450b-3p, miR-1468-5p, miR-320e, miR-665, miR-206-3p, miR-338-3p, miR-3184-3p, miR-539-5p, miR-590-3p, miR-665-5p, miR-219a-1-3p, miR-138, miR-188-5p, miR-653, miR-432, miR-873a-5p, miR-194-5p, novel\_23, miR-450c-3p, miR-3535, miR-432-5p, miR-412-5p, miR-2285g, miR-26b-3p, miR-2285l, miR-124-5p, miR-466f-3p, miR-660, miR-194a, miR-197-5p, miR-432-3p, miR-654-3p, let-7a-2-3p, let-7f-2-3p, let-7f-2-3p, miR-412-3p, miR-2319a, miR-148a-3p, miR-2285ab, miR-376b-5p, miR-670-3p, miR-378b, miR-7-1-3p, miR-26b-5p, miR-206, novel\_1, miR-147-5p, miR-142b, miR-335-5p, miR-219b-3p, miR-495-3p, novel\_101, let-7a-2-3p, miR-155-5p, miR-2411-5p, miR-450a-1-3p, miR-2284z, miR-6517, miR-152-3p, miR-2285b, miR-1, miR-329b, let-7g-3p, miR-671-5p, miR-1248, miR-190a-3p, miR-7144-5p, miR-3154, miR-154b-5p, miR-3068-3p, miR-138-5p, miR-135a-1-3p, miR-26c, miR-331-3p, let-7e-3p, miR-193a-5p, miR-30d-5p, miR-30e-5p, miR-1248, miR-329b, miR-30f, let-7g-3p, miR-10b-3p, miR-216b-3p, miR-660-5p, miR-155-5p, miR-2284n, miR-377-3p, miR-2284k, miR-669a-3p, miR-155-5p, miR-206-3p, miR-1197-3p, miR-30a-5p, miR-1434-5p, miR-217-5p, miR-1290, miR-3578, miR-30c-5p, let-7a-2-3p, miR-2284u, miR-218-1-3p, miR-155-5p, miR-1224-5p, novel\_121, miR-148b-3p, miR-302a-5p, miR-217, miR-664-3p, miR-2285af, miR-21-3p, miR-152-3p, miR-181b-5p, miR-2284m, miR-195a-3p, miR-3529-3p, miR-2284y, miR-129b-5p, miR-3065-5p, miR-1306, miR-148a-3p, miR-6516-3p, miR-7975, miR-493-5p, miR-541-5p, miR-378b, miR-664b, miR-2284g, miR-670-3p, miR-6402, miR-6123, miR-502b, miR-2285t, miR-206, miR-495-3p, miR-181d-5p, miR-2284j, miR-219b-3p, miR-2284w, miR-8095, miR-3959-3p, miR-3071-5p, miR-181a-5p, miR-2284x, miR-2284ab, miR-330-3p, miR-421, miR-2284d, miR-330-3p, miR-1306-5p, miR-377-3p, miR-660, miR-6240, let-7a-2-3p, miR-503-3p, miR-106a, miR-30a-3p, miR-17-5p, miR-106b-5p, miR-106a-5p, miR-20a-5p, miR-30e-3p, miR-2284y, miR-2284a, miR-93, miR-20a, miR-30a-3p, miR-2284b, miR-574-3p, miR-106a-5p, miR-20b-5p, miR-2284u, miR-93-5p, miR-17-5p, miR-1298-5p, miR-20b, miR-670-3p, miR-499b-5p, miR-30d-3p, miR-187-3p, miR-2284g, miR-452-3p, miR-106a

ZNF385D ENSOARGO(zinc fin.

PICALM ENSOARGO(phosphat

KIF26B ENSOARGO(kinesin

miR-639b, miR-135b-5p, miR-6516-3p, miR-107, miR-1291, miR-18a-3p, miR-21c, miR-3591-3p, miR-148a-3p, miR-376b-5p, miR-3120-3p, miR-655-5p, miR-378b, miR-656-5p, miR-203b-5p, miR-22-5p, novel\_1, miR-502-5p, miR-199b-5p, miR-326-3p, miR-24-3p, miR-211, miR-17-3p, novel\_101, miR-2284x, miR-16-1-3p, miR-138, miR-30b-3p, miR-21-5p, miR-3071-5p, miR-374b-3p, miR-145a-5p, miR-197-3p, miR-181a-5p, miR-1434-3p, miR-2113, miR-544b, miR-103, miR-3431, miR-412-5p, miR-3535, miR-339-5p, miR-103a-3p, miR-466f-3p, miR-125a-5p, miR-378a-5p, miR-2411-3p, novel\_51, miR-105-5p, miR-197-5p, let-7a-2-3p, miR-345-5p, miR-2284l, miR-654-3p, let-7f-2-3p, let-7f-2-3p, miR-130b-5p, miR-1248, miR-485-5p, miR-7144-5p, miR-376c-5p, let-7g-3p, miR-345-5p, miR-10b-3p, miR-376c-5p, miR-3154, miR-137-3p, miR-301, miR-503-3p, miR-154b-5p, miR-199a-5p, miR-125a, miR-874-3p, miR-134-5p, miR-204-5p, miR-138-5p, miR-3969, miR-409-3p, miR-135a-5p, miR-125b-5p, miR-6740-5p, miR-135a-1-3p, miR-410-5p, miR-2284k, miR-145-3p, miR-1197-3p, miR-193a-5p, miR-2284v, let-7a-2-3p, miR-200b-3p, miR-105-2, miR-330-5p, miR-134, miR-345-3p, miR-486-5p, miR-134-5p, miR-2284z, miR-6516-5p, miR-302a-5p, novel\_79, miR-196a-2-3p, miR-412, miR-6517, miR-429-3p, novel\_127, miR-152-3p, miR-107, miR-127-5p, miR-200c-3p, miR-181b-5p, miR-17-3p, miR-339a, miR-3071-3p, miR-200c, miR-2285af, miR-205-5p, miR-192-3p, miR-200a, miR-199a-5p, miR-29a-5p, miR-148b-5p, miR-181a-2-3p, miR-877-3p, miR-136-5p, miR-199b-5p, miR-1185-2-3p, miR-211-5p, miR-499b-5p, miR-20a-3p, miR-452-3p, miR-2440, miR-7705, miR-154a, miR-181d-5p, miR-2284j, miR-452-5p, miR-2447, miR-3120-5p, miR-2284aa, miR-2426, miR-544a, miR-1388-5p, miR-30b-3p, miR-758-3p, miR-412-3p, miR-323b, miR-4791, miR-296-5p, miR-6529a, miR-484, miR-1185-3p, miR-9788-3p, miR-455-3p, miR-1298-3p, miR-145b, miR-105-1, novel\_4, miR-

miR-2285e, miR-216a-3p, miR-9788-3p, miR-30b-3p, miR-484, miR-296-5p, miR-3120-5p, miR-2284aa, miR-16-2-3p, miR-450b-5p, miR-2426, miR-424-5p, miR-106a-5p, miR-2330-5p, miR-758-3p, miR-362-3p, miR-1306-5p, novel\_115, miR-326, miR-320b, miR-3085-3p, miR-10b, miR-3064-5p, novel\_94, miR-452-5p, miR-181d-5p, miR-2285f, miR-541-3p, miR-30b-5p, miR-2285n, miR-2285t, novel\_83, miR-199a-3p, miR-532-3p, miR-148b-3p, miR-15a-5p, miR-200b, miR-222-5p, miR-383-5p, miR-1197-5p, miR-5703, miR-2904, miR-2300b-3p, miR-362-3p, miR-126-3p, miR-378d, miR-4429, miR-941, miR-20a, miR-105-3p, miR-146a-5p, miR-2411, miR-299-3p, miR-21-3p, miR-466i-5p, miR-2284m, miR-106a, miR-320d, miR-182-5p, miR-3065-3p, novel\_32, miR-22-3p, miR-6516, miR-21a-3p, novel\_99, miR-18a-5p, miR-30f, let-7g-3p, miR-2312, miR-424-5p, miR-17-3p, miR-20b, miR-185-5p, miR-2285g, miR-2284d, miR-374b-3p, miR-1434-3p, miR-181a-5p, miR-219a-1-3p, miR-30b-3p, miR-2284ab, miR-363-5p, miR-130b-5p, miR-345-5p, miR-654-3p, miR-106a-5p, miR-17-5p, miR-466f-3p, miR-1343-5p, miR-2285l, miR-146b-3p, miR-378b, miR-18b, miR-2285ab, miR-195a-5p, miR-6395, miR-9851-3p, miR-2285k, miR-17-3p, miR-495-3p, miR-135a-2-3p, miR-2428, miR-326-3p, miR-211, miR-16a, miR-6402, miR-20a-5p, miR-15a, novel\_1, miR-214-5p, miR-582-3p, miR-6516-5p, miR-2411-5p, miR-134, miR-345-3p, miR-200b-3p, miR-4286, miR-2385-3p, miR-30a-3p, miR-3529-3p, miR-1957a, miR-3065-3p, miR-200c, miR-2397-5p, miR-200c-3p, miR-181b-5p, miR-17-3p, miR-2284n, miR-374c-3p, miR-18a, miR-320a, miR-17-5p, miR-3154, let-7g-3p, miR-103b, miR-93, miR-204-5p, miR-486b-3p, miR-410-3p, miR-181b-2-3p, miR-1343-3p, miR-2459, miR-455-3p, miR-758-3p, miR-541, miR-329-3p, miR-101c, miR-362-3p, miR-182-5p, miR-106b-5p, miR-16b, miR-199a-3p, miR-146b, miR-491-5p, miR-211-5p, miR-378g, miR-9-3p, miR-136-5p, miR-504, miR-

miR-199a-5p, miR-1957a, miR-376b-5p, miR-376c-5p, miR-29a-5p, miR-380-5p, miR-2478, miR-28b, miR-450b-5p, miR-29b-2-5p, miR-1, miR-30a-3p, miR-3529-3p, miR-107, miR-200a-3p, miR-543-5p, miR-17-3p, miR-6536, miR-200c-3p, miR-2285af, miR-6119-5p, miR-200c, miR-450a-1-3p, miR-545-5p, miR-2284z, novel\_121, miR-302a-5p, miR-322-5p, miR-429-3p, miR-200b-3p, miR-496, miR-411-3p, miR-3578, miR-1290, miR-16-5p, miR-103b, miR-486b-3p, miR-28-5p, miR-2284k, miR-135a-1-3p, miR-494-5p, miR-199a-5p, miR-133c, miR-2285aa, miR-141-3p, miR-574-5p, miR-3068-3p, miR-376c-5p, miR-1248, miR-1814c, miR-10b-3p, miR-329a, miR-200a-5p, miR-376c-5p, miR-2448-3p, miR-2284l, miR-380-5p, miR-130b-5p, miR-452-5p, miR-124-5p, miR-224-5p, miR-7-5p, miR-149-5p, novel\_116, miR-103, miR-544b, miR-103a-3p, miR-497-5p, miR-2284x, miR-16b, miR-380-3p, miR-22-3p, miR-450c-3p, novel\_23, miR-873a-5p, miR-1434-3p, miR-7b-5p, miR-199b-5p, miR-323c, miR-24-3p, miR-17-3p, novel\_101, miR-22-5p, miR-502b, miR-206, miR-379-3p, miR-16a, miR-15a, miR-28c, miR-677, miR-181b-3p, miR-7-1-3p, miR-3120-3p, novel\_68, miR-329-5p, miR-195a-5p, miR-379-5p, miR-450b-3p, miR-19a-3p, miR-107, miR-3065-5p, miR-376b-5p, miR-2387, miR-2424, miR-486-3p, miR-380-3p, miR-29b-1-5p, miR-181b-1-3p, miR-329a-5p, miR-216c-5p, miR-21-3p, miR-2284m, miR-202-5p, miR-466i-5p, miR-2285p, miR-532-3p, miR-7859, miR-200b, miR-15a-5p, miR-19b-3p, miR-2904, miR-188-3p, miR-140-3p, miR-2300b-3p, miR-362-3p, miR-122-5p, miR-3184-5p, miR-224-5p, miR-206-3p, miR-3074-2-3p, miR-708-5p, miR-424-5p, miR-130b-5p, miR-450b-3p, miR-487b-5p, miR-17-3p, miR-151-3p, miR-30a-3p, miR-29b-2-5p, miR-664a-5p, miR-30e-3p, miR-22-3p, miR-204-3p, miR-15b-5p, miR-544-3p, miR-582-5p, miR-2331-3p, miR-496-3p, miR-186-5p, miR-582-5p, miR-151b-3p, miR-199b-3p, miR-411, miR-487b-5p, miR-21a-3p, miR-

miR-2387, miR-1306, miR-18a-3p, miR-306b-5p, miR-3591-3p, miR-1291, miR-450b-3p, miR-146b-5p, miR-2319a, miR-195a-5p, miR-655-5p, miR-26b-5p, miR-411b-3p, miR-320c, miR-669, miR-15a, miR-6402, miR-20a-5p, miR-16a, novel\_87, miR-335-5p, miR-3957-3p, miR-193b-3p, miR-17-3p, miR-211, miR-24-3p, miR-371b-3p, miR-326-3p, miR-199b-5p, miR-873a-5p, miR-181a-5p, miR-1843b-5p, miR-2113, miR-1434-3p, miR-16b, miR-30b-3p, miR-497-5p, miR-2284x, miR-744-5p, miR-3955-5p, miR-340-3p, miR-31-5p, miR-133b-5p, miR-503-5p, miR-134-3p, miR-149-5p, miR-194-3p, miR-20b, miR-503-5p, miR-224-5p, miR-146a, miR-365b-5p, miR-330-3p, novel\_51, miR-17-5p, miR-106a-5p, miR-378a-5p, miR-125a-5p, miR-466f-3p, miR-193a-3p, miR-380-5p, miR-6240, miR-2448-3p, miR-93-5p, miR-320a, miR-17-5p, miR-20b-5p, miR-485-5p, miR-874-3p, miR-125a, miR-374c-3p, miR-300-3p, miR-199a-5p, miR-125b-5p, miR-26c, miR-3969, miR-28-5p, miR-134-5p, miR-204-5p, miR-6128, miR-16-5p, miR-193a-5p, miR-93, miR-1197-3p, miR-365a-5p, miR-134, miR-330-5p, miR-322-5p, miR-758-5p, miR-134-5p, miR-214-5p, miR-30c-2-3p, miR-217, miR-17-3p, miR-181b-5p, novel\_127, miR-543-5p, miR-3064-5p, miR-2385-3p, miR-380-5p, miR-199a-5p, miR-3065-3p, miR-1271-3p, miR-199b-5p, miR-378j, miR-9-3p, miR-877-3p, miR-4792, miR-3064-5p, miR-452-3p, miR-20a-3p, miR-2319b, miR-2285u, miR-211-5p, miR-499a-3p, miR-378g, miR-3082-5p, miR-218-5p, miR-101-3p, miR-107-5p, miR-499a-5p, miR-335, miR-3059-5p, miR-2447, miR-541-3p, miR-181d-5p, miR-452-5p, novel\_111, miR-296-5p, miR-541, miR-30b-3p, miR-101c, miR-1343-3p, novel\_4, miR-330-3p, miR-147a, miR-455-3p, miR-9788-3p, miR-320b, miR-326, miR-1306-5p, miR-106b-5p, miR-16b, miR-3085-3p, miR-146b, miR-199b-5p, miR-103a-2-5p, miR-214-3p, miR-574-3p, miR-424-5p, miR-382-3p, miR-106a-5p, miR-30c-1-3p, miR-8485, miR-4532, miR-411, novel\_99, miR-30c-1-3p, miR-

miR-7-5p, miR-106a-5p, miR-17-5p, miR-197-5p, miR-539-3p, miR-668-3p, miR-101-5p, miR-16-1-3p, miR-1260b, miR-7b-5p, miR-1434-3p, miR-1843b-5p, miR-3071-5p, miR-450c-3p, miR-197-3p, miR-3431, miR-412-5p, miR-103, miR-20b, miR-149-5p, miR-103a-3p, miR-31-5p, miR-3955-5p, miR-26b-3p, miR-130a-3p, novel\_1, miR-6119-3p, miR-6123, miR-656-5p, miR-133a-5p, miR-20a-5p, miR-33a-3p, miR-34c, miR-323c, miR-371b-3p, miR-301b-3p, miR-2284w, miR-449a, miR-495-3p, miR-107, miR-19a-3p, miR-376b-3p, miR-18a-3p, miR-378b, miR-411b-3p, miR-374c-3p, miR-34b, miR-299b-3p, miR-144-3p, miR-320c, miR-26b-5p, miR-7-1-3p, miR-200c-3p, miR-543-5p, miR-200a-3p, novel\_127, miR-107, miR-219-3p, miR-200c, miR-6119-5p, miR-376b-3p, miR-1260a, miR-2478, miR-2285b, miR-450c-5p, miR-200a, miR-30a-3p, miR-3064-5p, miR-300, miR-200b-3p, miR-30c, miR-3578, miR-1290, miR-30a-5p, miR-9-5p, novel\_121, miR-582-3p, miR-450a-1-3p, miR-429-3p, miR-299a-3p, miR-2332, miR-3969, miR-100-3p, miR-1260b, miR-93, miR-329a, miR-2318, miR-671-5p, miR-20b-5p, miR-3074-1-3p, miR-381-3p, miR-488-3p, miR-320a, miR-17-5p, miR-200a-5p, miR-93-5p, miR-365a-3p, miR-374c-3p, miR-34c-5p, miR-487a-3p, miR-141-3p, miR-2285aa, miR-130b-3p, miR-3955-3p, miR-3085-3p, miR-153-3p, miR-320b, miR-106b-5p, miR-29b-1-5p, miR-505, miR-362-3p, miR-106a-5p, miR-124a, miR-652-5p, miR-33a-5p, miR-362-3p, miR-329-3p, miR-484, miR-147a, miR-539-5p, miR-376b-3p, miR-153, miR-2459, miR-421, miR-455-3p, novel\_78, miR-409b, miR-548w, miR-151a-3p, miR-450a-5p, miR-154-3p, miR-2285t, miR-490-5p, miR-30b-5p, novel\_111, miR-154a, miR-219a-2-3p, miR-1285-5p, miR-212-3p, miR-32-3p, miR-9-5p, miR-190b-5p, miR-299b-5p, miR-376a-3p, miR-7857-3p, miR-376d, miR-454-5p, miR-203-3p, miR-20a-3p, miR-3064-5p, miR-466i-5p, miR-106a, miR-320d, miR-299-3p, miR-34b-5p, miR-

miR-182-5p, miR-21-3p, miR-32-5p, miR-504-5p, miR-151b, novel\_32, miR-22-3p, miR-6130, miR-377-3p, miR-500a-3p, miR-1827, miR-339b, miR-214, miR-145a-3p, miR-129-2-3p, miR-4510, miR-539-5p, miR-224-5p, miR-6525, miR-665, miR-324-3p, miR-2285j, miR-874-5p, miR-500, miR-485-3p, miR-3600, miR-151-5p, miR-200b, miR-222-5p, miR-7859, miR-487a-3p, miR-1197-5p, miR-1434-5p, miR-362-3p, miR-2887, miR-329a-5p, miR-216c-5p, miR-377-5p, miR-664b-3p, miR-92a-1-5p, novel\_17, miR-210-5p, miR-760-3p, miR-10b, miR-500-3p, miR-668-5p, miR-504, miR-2284j, miR-3956-3p, miR-212-3p, miR-363-3p, miR-885-5p, novel\_60, miR-502-3p, miR-371a-5p, miR-2285n, miR-2285t, miR-4726-5p, miR-222-5p, miR-1343-3p, novel\_4, miR-2300a-5p, miR-421, miR-9788-3p, miR-455-3p, miR-2320-3p, miR-1298-3p, miR-30b-3p, miR-501-3p, miR-329-3p, miR-3120-5p, miR-2426, miR-362-3p, miR-1388-5p, miR-744-3p, miR-2330-5p, miR-1388-3p, miR-8485, miR-193a, miR-182-5p, miR-505, miR-362-3p, miR-342, miR-214-3p, miR-491-5p, miR-141-3p, miR-3068-3p, miR-2284n, miR-25-3p, miR-381-3p, miR-485-5p, miR-7144-5p, novel\_48, miR-329b, novel\_91, miR-329a, miR-28a-3p, miR-1197-3p, miR-331-3p, miR-2284k, miR-410-5p, novel\_63, miR-1224-5p, novel\_79, miR-7641, miR-429-3p, miR-214-5p, miR-129-1-3p, miR-483-3p, miR-501-3p, miR-3578, miR-200b-3p, miR-300, miR-4286, miR-181a-2-3p, novel\_39, miR-29a-5p, miR-92b-3p, miR-148b-5p, miR-339a, miR-125a-3p, miR-200c, miR-92a-3p, miR-543-5p, novel\_96, miR-200a-3p, miR-200c-3p, miR-450a-2-3p, miR-28-3p, miR-329-5p, miR-3591-3p, miR-342-3p, miR-576-3p, novel\_1, miR-92a-3p, miR-377-5p, miR-339-5p, miR-411-5p, miR-3431, miR-2284d, miR-197-3p, miR-22-3p, miR-7b-5p, miR-223-3p, miR-873a-5p, miR-708-3p, miR-125b-1-3p, miR-30b-3p, miR-503-3p, miR-539-3p, miR-2284l, miR-377-3p, miR-224-5p, miR-7-5p, miR-166f-3p, miR-182-3p, miR-129-2-3p, miR-4510, miR-214, miR-665-5p, miR-133a-3p, miR-6134, miR-874-5p, miR-30c-1-3p, miR-574-5p, miR-6130, miR-204-3p, miR-2448-3p, miR-129b-3p, miR-133b-3p, miR-329a, miR-1827, miR-216c-5p, miR-181a-2-3p, miR-380-5p, miR-28b, novel\_39, miR-490-3p, miR-196a-3p, miR-210-5p, miR-30c-2-3p, miR-760-3p, miR-2484, miR-543-5p, miR-152-3p, novel\_127, miR-18a-3p, miR-758-5p, miR-148b-3p, miR-582-3p, novel\_83, miR-129-1-3p, miR-214-5p, novel\_133, miR-362-3p, miR-124-3p, miR-1343-5p, miR-330-5p, miR-1197-5p, miR-2447, miR-326-3p, novel\_82, miR-28c, miR-4726-5p, miR-7977, miR-670-3p, miR-6535, miR-4443, miR-148a-3p, miR-18a-3p, miR-3065-5p, miR-450b-3p, miR-412-3p, miR-1983, miR-380-5p, miR-124a, miR-30c-1-3p, miR-654-3p, miR-326, miR-362-3p, miR-1343-5p, miR-214-3p, miR-455-3p, miR-2355-3p, miR-329-3p, miR-7857, miR-362-3p, miR-2426, miR-744-5p

NRF1

ENSOARGO(nuclear

FAM187B

ENSOARGO(family w

miR-149-5p, miR-2459, miR-2355-3p, miR-134-3p, miR-185-5p, novel\_4, miR-1343-3p, miR-138, miR-450b-5p, miR-653, miR-296-5p, miR-1843b-5p, miR-8485, let-7a-2-3p, miR-30c-1-3p, miR-668-3p, miR-628-5p, miR-380-5p, miR-124a, miR-146b, miR-466f-3p, miR-491-5p, miR-5126, miR-146a, miR-326, miR-3596, miR-499a-3p, miR-378g, miR-411b-3p, novel\_69, miR-34b, miR-7977, novel\_68, miR-664b, miR-146b-5p, miR-877-3p, miR-18a-3p, miR-326-3p, miR-449a, miR-423-5p, miR-7705, miR-452-5p, novel\_101, miR-2447, miR-6123, miR-128-1-5p, miR-34c, miR-151-5p, novel\_121, miR-486-5p, miR-2411-5p, miR-212-5p, miR-548e-3p, miR-18a-3p, miR-218-1-3p, let-7a-2-3p, miR-34a-5p, miR-124-3p, miR-23b-5p, miR-330-5p, miR-5703, miR-126-3p, miR-2411, miR-146a-5p, miR-143-3p, miR-664b-3p, miR-380-5p, miR-4286, miR-181a-2-3p, miR-34b-5p, novel\_127, novel\_96, miR-760-3p, miR-99a-3p, miR-30c-2-3p, miR-185-3p, miR-8117, miR-664-3p, miR-204-3p, miR-151b, miR-34c-5p, miR-499b-3p, miR-6130, miR-99a-3p, miR-30c-1-3p, miR-7144-5p, miR-1248, miR-671-5p, let-7g-3p, let-7g-3p, miR-500a-3p, miR-200a-5p, miR-3154, miR-433-3p, miR-2448-3p, miR-3184-5p, miR-6134, miR-6525, miR-4510, miR-874-5p, miR-500, miR-138-5p, miR-34c-3p, miR-2433, miR-99b-3p, miR-93-5p, miR-320a, miR-20b-5p, miR-9-3p, miR-320c, miR-154b-5p, miR-299b-3p, miR-365a-3p, miR-338-5p, miR-3969, miR-382-5p, miR-218-5p, miR-421-5p, miR-708-5p, miR-28-5p, novel\_120, miR-3059-5p, miR-145a-3p, miR-9-3p, miR-145-3p, miR-93, miR-361-3p, miR-371b-3p, miR-1434-3p, miR-16-1-3p, miR-4429, miR-16-1-3p, miR-299a-3p, miR-106a, miR-194-3p, miR-20b, miR-539-5p, miR-320b, novel\_17, miR-299-3p, miR-320d, miR-106a, miR-3955-3p, miR-106a-5p, miR-2432, miR-1957a, miR-421-5p, miR-22841, miR-664a-5p, miR-1260b, novel\_42, miR-539-5p, miR-181a-2-3p, miR-3074-5p, miR-4510, miR-214, miR-133a-3p, miR-133b-3p, miR-1248, miR-21a-3p, miR-129b-3p, miR-3154, miR-499b-3p, miR-6130, miR-204-3p, miR-199a-5p, miR-30c-1-3p, miR-370-3p, miR-552-3p, miR-2898, miR-1277-5p, novel\_96, miR-1260a, novel\_17, miR-30c-2-3p, miR-199a-5p, miR-490-3p, miR-503-5p, miR-3064-5p, miR-133a-3p, miR-1290, miR-1343-5p, miR-1197-5p, miR-5703, miR-505-5p, miR-576-3p, miR-1307-5p, miR-1307-3p, miR-199b-5p, miR-2447, miR-361-3p, miR-199b-5p, miR-3141, miR-499a-3p, miR-6535, miR-3064-5p, miR-3074-5p, miR-7689-3p, miR-3120-3p, miR-491-5p, miR-3085-3p, miR-199b-5p, miR-1343-5p, miR-214-3p, miR-503-5p, miR-7-5p, miR-296-3p, miR-3141, novel\_51, miR-30c-1-3p, miR-296-3p, miR-4532, miR-363-5p, miR-1260b, miR-188-5p, miR-744-5p, miR-873a-5p, miR-7b-5p, miR-503-5p, miR-185-5p, miR-194-3p, miR-421, miR-2300a-5p

STK4 ENSOARGOC serine/threonine kinase 4

CPQ ENSOARGOC carboxypeptidase Y

ATP6AP1 ENSOARGOC ATPase, 1



LHX3

ENSOARGOCLIM home,

miR-3082-5p, miR-378g, miR-378e, miR-454-5p, miR-4792, miR-24-1-5p, miR-1983, miR-361-3p, miR-361-3p, miR-423-5p, miR-541-3p, miR-2447, miR-301a-5p, miR-1298-3p, miR-409b, miR-1343-3p, miR-151a-3p, miR-181b-2-3p, miR-2426, miR-450b-5p, miR-378c, miR-301b-5p, miR-541, miR-6529a, miR-484, miR-378b, miR-30b-3p, miR-30c-1-3p, miR-378d, miR-4532, miR-424-5p, miR-2330-5p, miR-1388-3p, miR-491-5p, novel\_103, miR-326, miR-182-5p, miR-16b, miR-6130, miR-323-5p, miR-15b-5p, novel\_32, miR-204-3p, miR-22-3p, miR-378a-3p, miR-30c-1-3p, miR-221-5p, miR-296-3p, miR-182-5p, miR-370-5p, novel\_99, miR-21a-3p, miR-6525, miR-3184-5p, miR-4510, miR-3184-3p, miR-145a-3p, miR-378c, miR-2330-3p, miR-424-5p, miR-874-5p, miR-151-3p, miR-19b-1-5p, miR-15a-5p, miR-378i, novel\_133, miR-378a-3p, miR-1197-5p, miR-181b-1-3p, miR-486-3p, miR-345-3p, miR-221-5p, miR-196a-3p, miR-125b, miR-422a, novel\_69, miR-323a-5p, miR-181b-3p, miR-677, miR-6535, miR-3120-3p, miR-412-3p, miR-1291, miR-195a-5p, miR-378f, miR-2387, miR-326-3p, novel\_120, miR-1193, miR-2285x, miR-6402, miR-28c, miR-502-5p, miR-1247-3p, miR-15a, miR-16a, miR-134-3p, miR-185-5p, miR-31-5p, miR-26b-3p, miR-138, miR-30b-3p, miR-16b, miR-4508, miR-497-5p, miR-542-3p, miR-7b-5p, miR-19b-2-5p, miR-374b-3p, miR-22-3p, miR-125a-5p, miR-452-5p, miR-1343-5p, miR-7-5p, miR-1271, miR-615-5p, miR-125a, miR-542-5p, miR-370-3p, miR-23a-5p, miR-378c, miR-6128, miR-16-5p, miR-193a-5p, novel\_9, miR-138-5p, miR-486b-3p, miR-370-5p, miR-2433, miR-331-3p, miR-125b-5p, miR-758-5p, miR-378h, miR-322-5p, miR-7641, miR-3578, miR-330-5p, miR-1343-5p, miR-28b, miR-24-2-5p, miR-490-3p, miR-2285b, novel\_39, miR-543-5p, novel\_96, miR-30c-2-3p

|       |                     |                                                                                                                                                                                                                                                                                                                                                                                                                                                                                                                                                                                                                                                                                                                                                                                                                                                                                                                                                                                                                                                                                                                                                                                                                                                                                                                                                                                                                                                                                                                                                                                                                                                                                                                                                                                                                                                                                                |
|-------|---------------------|------------------------------------------------------------------------------------------------------------------------------------------------------------------------------------------------------------------------------------------------------------------------------------------------------------------------------------------------------------------------------------------------------------------------------------------------------------------------------------------------------------------------------------------------------------------------------------------------------------------------------------------------------------------------------------------------------------------------------------------------------------------------------------------------------------------------------------------------------------------------------------------------------------------------------------------------------------------------------------------------------------------------------------------------------------------------------------------------------------------------------------------------------------------------------------------------------------------------------------------------------------------------------------------------------------------------------------------------------------------------------------------------------------------------------------------------------------------------------------------------------------------------------------------------------------------------------------------------------------------------------------------------------------------------------------------------------------------------------------------------------------------------------------------------------------------------------------------------------------------------------------------------|
| THEGL | ENSOARGO( theg spe: | <p>miR-885-5p, miR-363-3p, miR-2447, miR-190b-5p, miR-194b-5p, miR-3968, miR-490-5p, miR-2319b, miR-24-1-5p, miR-7977, miR-4443, miR-504, miR-136-5p, miR-877-3p, miR-493-5p, miR-424-5p, miR-16b, miR-29b-1-5p, miR-105-1, miR-548w, miR-330-3p, novel_78, novel_4, miR-145b, miR-539-5p, miR-142-5p, miR-484, miR-412-3p, miR-3120-5p, miR-21b, miR-224-5p, miR-142a-5p, miR-30e-3p, miR-2285j, miR-655-3p, miR-324-3p, miR-30a-3p, miR-664a, miR-17-3p, miR-424-5p, miR-4492, miR-190a-5p, miR-660-5p, miR-2331-3p, miR-504-5p, miR-323-5p, miR-376e-3p, miR-15b-5p, miR-204-3p, miR-21a-3p, miR-655, miR-433-3p, miR-129b-3p, miR-345-5p, miR-1827, miR-2285w, miR-329a-5p, miR-130a-5p, miR-376c-3p, miR-29b-1-5p, miR-2432, miR-486-3p, miR-202-5p, miR-21-3p, miR-30d-3p, miR-148b-3p, miR-15a-5p, miR-1247-5p, miR-2284h-5p, miR-193b-5p, miR-1434-5p, miR-17-3p, miR-15a, miR-16a, miR-147-5p, miR-656-5p, miR-378b, miR-329-5p, miR-3120-3p, miR-323a-5p, miR-2404, miR-148a-3p, miR-195a-5p, miR-493-5p, miR-6240, miR-668-3p, miR-363-5p, miR-345-5p, miR-224-5p, miR-194a, miR-190a, miR-330-3p, miR-105-5p, miR-660, miR-31-5p, miR-185-5p, miR-3431, miR-194-3p, miR-1843b-5p, miR-145a-5p, miR-194-5p, miR-138, miR-16b, miR-2284x, miR-2889, miR-497-5p, miR-16-5p, miR-138-5p, miR-486b-3p, miR-141-3p, miR-370-3p, miR-2355-5p, miR-376c-3p, miR-301, miR-345-5p, miR-329b, miR-671-5p, miR-485-5p, miR-30a-3p, miR-24-2-5p, miR-125a-3p, miR-17-3p, miR-2898, miR-200a-3p, miR-152-3p, miR-412, miR-322-5p, miR-24-2-5p, novel_121, miR-218-2-3p, miR-582-3p, miR-105-2 miR-15a, miR-2284k, miR-135a-5p, novel_87, miR-16a, miR-628-3p, miR-424-5p, miR-2284v, miR-378c, miR-16-5p, miR-378c, novel_27, miR-503-3p, miR-378j, miR-195a-5p, miR-378f, miR-135b-5p, miR-378b, miR-496-3p, miR-503-3p, miR-378a-3p, miR-30c-1-3p, miR-3120-3p, miR-378e, miR-15b-5p, miR-</p> |
| FOXN2 | ENSOARGO( forkhead  | <p>422a, miR-16b, miR-30c-2-3p, miR-216a-5p, miR-760-3p, miR-2284m, miR-424-5p, miR-2284b, miR-30c-1-3p, miR-378d, miR-2284a, miR-193a, miR-378i, miR-378b, miR-378a-3p, miR-378c, miR-2284ab, miR-16b, miR-2284u, miR-188-5p, miR-496, miR-497-5p, miR-2284aa, miR-3600, miR-196a-2-3p, miR-15a-5p, miR-378h, miR-322-5p, miR-2284d, miR-2284z</p>                                                                                                                                                                                                                                                                                                                                                                                                                                                                                                                                                                                                                                                                                                                                                                                                                                                                                                                                                                                                                                                                                                                                                                                                                                                                                                                                                                                                                                                                                                                                            |

miR-3074-5p, novel\_68, miR-669, miR-411b-3p, miR-34b, novel\_69, miR-2404, miR-323a-5p, miR-146b-3p, miR-3591-3p, miR-1306, miR-3141, miR-379-5p, miR-1291, miR-1193, miR-2428, miR-449a, miR-382-5p, miR-34c, miR-208a-3p, miR-576-3p, miR-22-5p, miR-128-1-5p, miR-31-5p, miR-340-3p, miR-149-5p, miR-3431, miR-432-5p, miR-197-3p, miR-22-3p, miR-542-3p, miR-432, miR-2889, miR-744-5p, miR-16-1-3p, miR-30b-3p, miR-493-5p, miR-6240, miR-345-5p, miR-432-3p, novel\_51, miR-330-3p, miR-365b-5p, miR-3141, miR-197-5p, miR-105-5p, miR-1343-5p, miR-141-3p, miR-1271, miR-615-5p, miR-370-3p, miR-542-5p, miR-2285aa, miR-2355-5p, miR-874-3p, miR-34c-5p, miR-671-5p, miR-345-5p, miR-365a-5p, miR-145-3p, miR-1197-3p, miR-6740-5p, miR-331-3p, miR-370-5p, miR-5100, miR-2433, miR-486b-3p, miR-134-5p, miR-28-5p, novel\_9, miR-6517, miR-134-5p, miR-1271-5p, miR-9-5p, miR-1343-5p, miR-134, miR-615-3p, miR-490-3p, miR-1271-3p, miR-3065-3p, miR-200a, novel\_39, miR-30c-2-3p, novel\_96, miR-200a-3p, miR-450a-2-3p, miR-7977, miR-2319b, miR-4443, miR-3596, miR-129b-5p, miR-361-3p, miR-493-5p, miR-504, miR-96-5p, miR-9-5p, miR-541-3p, miR-3059-5p, miR-4454, miR-2447, miR-7705, miR-423-5p, novel\_111, miR-361-3p, miR-615, novel\_82, miR-4726-5p, miR-1343-3p, miR-330-3p, miR-2300a-5p, miR-151a-3p, miR-2459, miR-9788-3p, miR-496-5p, miR-30b-3p, miR-541, miR-484, miR-296-5p, miR-3120-5p, miR-1839-5p, miR-2330-5p, miR-1388-3p, miR-193a, miR-30c-1-3p, miR-505, miR-29b-1-5p, miR-1306-5p, miR-491-5p, miR-3065-3p, miR-21-3p, miR-370-5p, miR-504-5p, miR-30c-1-3p, miR-151b, miR-204-3p, miR-22-3p, miR-6130, miR-323-5p, miR-1895, miR-345-5p, let-7g-3p, miR-3074-2-3p, miR-1271, miR-3074-5p, miR-145a-3p, miR-3184-3p, miR-4510, miR-6134, miR-122-5p, miR-3184-5p, miR-6525, miR-665, miR-324-3p, miR-151-3p, miR-708-5p, miR-129-2-3p, miR-3074-5p, miR-590-3p, novel\_42, miR-214, miR-665-5p, miR-2433, miR-144, miR-132-5p, miR-331-3p, miR-664a, miR-486b-3p, miR-4492, miR-874-5p, miR-129-5p, miR-874-3p, miR-221-5p, miR-2355-5p, miR-377-3p, miR-300-3p, novel\_32, miR-21a-3p, miR-23b, miR-329a, miR-485-5p, miR-1895, miR-625-5p, miR-3064-5p, miR-130a-5p, miR-486-3p, miR-205-5p, miR-185-3p, novel\_127, miR-221-5p, miR-3960, miR-18a-3p, miR-2285ad, miR-212-5p, miR-1224-5p, miR-23c, miR-222-5p, miR-23b-3p, miR-505-5p, miR-129-1-3p, miR-532-3p, miR-362-3p, miR-2366, novel\_133, miR-1197-5p, miR-1343-5p, miR-300, miR-128-3p, miR-541-3p, miR-342-3p, miR-3059-5p, miR-371b-3p, miR-361-3p, miR-6402, miR-6529b, miR-4324, miR-371a-5p, miR-2285y, miR-128-1-5p, miR-199c, miR-6123, miR-3074-5p, miR-3064-5p, miR-3120-3p, miR-7977, miR-320b, miR-27a-3p, miR-6535, miR-144-3p, miR-361-3p, miR-3065-5p, miR-216a-3p, miR-18a-3p, miR-1291, miR-101b-3p, miR-574-3p, miR-1388-3p, miR-23a-3p, miR-432-3p, miR-4532, miR-8485, miR-377-3p, miR-5126, novel\_103, miR-342, novel\_51, miR-455-5p, miR-2331-5p, miR-362-3p, miR-3085-3p, miR-214-3p, miR-466f-3p, miR-1343-5p, miR-199b-3p, miR-222-5p, miR-27a-3p, miR-432-5p, miR-541, miR-296-5p, miR-432, miR-329-3p, miR-362-3p, miR-744-5p, miR-27b-3p, miR-2889, miR-455-5p, miR-1839-5p

IL34 ENSOARGO(interleu. 1343-5p, miR-134, miR-615-3p, miR-490-3p, miR-1271-3p, miR-3065-3p, miR-200a, novel\_39, miR-30c-2-3p, novel\_96, miR-200a-3p, miR-450a-2-3p, miR-7977, miR-2319b, miR-4443, miR-3596, miR-129b-5p, miR-361-3p, miR-493-5p, miR-504, miR-96-5p, miR-9-5p, miR-541-3p, miR-3059-5p, miR-4454, miR-2447, miR-7705, miR-423-5p, novel\_111, miR-361-3p, miR-615, novel\_82, miR-4726-5p, miR-1343-3p, miR-330-3p, miR-2300a-5p, miR-151a-3p, miR-2459, miR-9788-3p, miR-496-5p, miR-30b-3p, miR-541, miR-484, miR-296-5p, miR-3120-5p, miR-1839-5p, miR-2330-5p, miR-1388-3p, miR-193a, miR-30c-1-3p, miR-505, miR-29b-1-5p, miR-1306-5p, miR-491-5p, miR-3065-3p, miR-21-3p, miR-370-5p, miR-504-5p, miR-30c-1-3p, miR-151b, miR-204-3p, miR-22-3p, miR-6130, miR-323-5p, miR-1895, miR-345-5p, let-7g-3p, miR-3074-2-3p, miR-1271, miR-3074-5p, miR-145a-3p, miR-3184-3p, miR-4510, miR-6134, miR-122-5p, miR-3184-5p, miR-6525, miR-665, miR-324-3p, miR-151-3p, miR-708-5p, miR-129-2-3p, miR-3074-5p, miR-590-3p, novel\_42, miR-214, miR-665-5p, miR-2433, miR-144, miR-132-5p, miR-331-3p, miR-664a, miR-486b-3p, miR-4492, miR-874-5p, miR-129-5p, miR-874-3p, miR-221-5p, miR-2355-5p, miR-377-3p, miR-300-3p, novel\_32, miR-21a-3p, miR-23b, miR-329a, miR-485-5p, miR-1895, miR-625-5p, miR-3064-5p, miR-130a-5p, miR-486-3p, miR-205-5p, miR-185-3p, novel\_127, miR-221-5p, miR-3960, miR-18a-3p, miR-2285ad, miR-212-5p, miR-1224-5p, miR-23c, miR-222-5p, miR-23b-3p, miR-505-5p, miR-129-1-3p, miR-532-3p, miR-362-3p, miR-2366, novel\_133, miR-1197-5p, miR-1343-5p, miR-300, miR-128-3p, miR-541-3p, miR-342-3p, miR-3059-5p, miR-371b-3p, miR-361-3p, miR-6402, miR-6529b, miR-4324, miR-371a-5p, miR-2285y, miR-128-1-5p, miR-199c, miR-6123, miR-3074-5p, miR-3064-5p, miR-3120-3p, miR-7977, miR-320b, miR-27a-3p, miR-6535, miR-144-3p, miR-361-3p, miR-3065-5p, miR-216a-3p, miR-18a-3p, miR-1291, miR-101b-3p, miR-574-3p, miR-1388-3p, miR-23a-3p, miR-432-3p, miR-4532, miR-8485, miR-377-3p, miR-5126, novel\_103, miR-342, novel\_51, miR-455-5p, miR-2331-5p, miR-362-3p, miR-3085-3p, miR-214-3p, miR-466f-3p, miR-1343-5p, miR-199b-3p, miR-222-5p, miR-27a-3p, miR-432-5p, miR-541, miR-296-5p, miR-432, miR-329-3p, miR-362-3p, miR-744-5p, miR-27b-3p, miR-2889, miR-455-5p, miR-1839-5p

MBD2 ENSOARGO(methyl-C: miR-341-3p, miR-542-5p

miR-145-3p, miR-16-5p, miR-134-5p, miR-551b-3p, miR-2433, miR-331-3p, miR-6740-5p, miR-125b-5p, miR-769, miR-874-3p, miR-125a, miR-615-5p, miR-2355-5p, miR-329b, miR-671-5p, miR-3154, miR-1271-3p, miR-3065-3p, miR-181a-2-3p, miR-3064-5p, miR-2898, novel\_127, miR-543-5p, novel\_96, miR-219-3p, miR-205-5p, miR-339a, miR-30c-2-3p, miR-322-5p, miR-214-5p, miR-486-5p, miR-134-5p, miR-6517, miR-299a-3p, novel\_79, miR-134, miR-345-3p, miR-330-5p, miR-2428, miR-326-3p, miR-542-5p, miR-15a, miR-16a, miR-299b-3p, miR-669, miR-378b, novel\_68, miR-1291, miR-6395, miR-195a-5p, miR-2387, miR-18a-3p, miR-654-3p, miR-363-5p, miR-378a-5p, miR-125a-5p, miR-377-3p, miR-224-5p, miR-2411-3p, miR-432-5p, miR-2355-3p, miR-149-5p, novel\_116, miR-339-5p, miR-16b, miR-2889, miR-497-5p, miR-432, miR-346, miR-224-5p, miR-769-5p, miR-145a-3p, miR-665-5p, miR-214, novel\_74, miR-4492, miR-424-5p, miR-665, miR-219b-3p, miR-377-3p, miR-15b-5p, miR-221-5p, miR-2331-3p, miR-30c-1-3p, miR-3065-3p, miR-339b, miR-466i-5p, miR-760-3p, miR-299-3p, miR-221-5p, miR-542-5p, miR-125b, miR-185-3p, miR-324-3p, miR-3601, miR-15a-5p, miR-328-3p, miR-18a-3p, miR-493-3p, miR-378d, miR-133a-3p, miR-218-1-3p, miR-193b-5p, miR-2904, miR-877-3p, miR-361-3p, miR-219a-2-3p, miR-541-3p, miR-4726-5p, miR-2284q, miR-218-5p, miR-301a-5p, miR-769-5p, miR-371a-5p, miR-2483-3p, miR-452-3p, miR-20a-3p, miR-3064-5p, miR-7977, novel\_94, miR-544-5p, miR-361-3p, miR-378j, miR-30c-1-3p, miR-2330-5p, miR-424-5p, miR-127-3p, miR-33a-5p, miR-3085-3p, miR-491-5p, miR-214-3p, miR-542-5p, miR-326, miR-16b, novel\_4, miR-2426, miR-3120-5p, miR-301b-5p, miR-541, miR-125b-2-3p, miR-2284z, miR-134-5p, miR-1185-3p, miR-2284d, miR-9-5p, miR-30d-3p, miR-3955-5p, miR-105-1, miR-105-2, miR-16-1-3p, miR-2284aa, miR-362-3p, miR-2284ab, miR-16-1-3p, miR-124-3p, miR-218-2-3p, miR-3071-5p, miR-3591-5p, miR-653, miR-329-3p, miR-134, miR-362-3p, miR-2432, miR-491-3p, miR-654-3p, miR-30a-3p, let-7f-2-3p, let-7f-2-3p, miR-124a, miR-105-3p, miR-466f-3p, miR-2284m, miR-127-5p, miR-99a-3p, miR-105-5p, miR-362-3p, miR-2284n, miR-1185-2-3p, novel\_69, miR-99a-3p, miR-2285aa, miR-211-5p, miR-7144-5p, miR-135b-5p, miR-329a, miR-21c, miR-488-3p, miR-211, miR-3957-3p, miR-2284j, miR-9-5p, miR-2284v, miR-22-5p, miR-134-5p, miR-204-5p, novel\_9, miR-30a-3p, miR-135a-5p, miR-409-3p, miR-30e-3p, miR-99b-3p, miR-615, miR-370-5p, miR-142b, let-7f, novel\_87, let-7i, miR-324-3p, miR-451a, miR-486b-3p, miR-134-5p, miR-130b-5p, miR-145a-3p, miR-4510, miR-1193, miR-193b-3p, miR-3607-3p, miR-224-5p, miR-21a-3p, miR-412-3p, miR-1827, miR-1983, miR-2319b, miR-370-5p, miR-2285aa, miR-6130, miR-193b-3p, miR-544-3p, miR-4443, let-7i-5p, novel\_103, miR-224-5p, miR-3071-3p, let-7f-5p, miR-98-5p, miR-193a-3p, miR-543-5p, miR-21-3p, miR-130b-5p, miR-192-3p, miR-486-3p, miR-200a, let-7g, miR-134, miR-143-5p, miR-615-3p, miR-544a, miR-5010-3p, let-7g-5p, miR-126a-5p, miR-544b, miR-134-5p, miR-545-5p, miR-582-3p

UBAC1 ENSOARGOC UBA doma

MMP13 ENSOARGOC matrix m

WWTR1 ENSOARGOC WW domai

|       |                   |                                                                                                                                                                                                                                                                                                                                                                                                                                                                                                                                                                                                                                                                                                                                                                                                                                                                                                                                                                                                                                                                                                                                                                                                                                                                                                                                                                                                                                                                                                                                                                                                                                                                                                                                                                                                                                                                                                                                                                                                                                                                                                                                                                                                                                                                                                                                                                                                                                                                                                                                                                                                                                                              |
|-------|-------------------|--------------------------------------------------------------------------------------------------------------------------------------------------------------------------------------------------------------------------------------------------------------------------------------------------------------------------------------------------------------------------------------------------------------------------------------------------------------------------------------------------------------------------------------------------------------------------------------------------------------------------------------------------------------------------------------------------------------------------------------------------------------------------------------------------------------------------------------------------------------------------------------------------------------------------------------------------------------------------------------------------------------------------------------------------------------------------------------------------------------------------------------------------------------------------------------------------------------------------------------------------------------------------------------------------------------------------------------------------------------------------------------------------------------------------------------------------------------------------------------------------------------------------------------------------------------------------------------------------------------------------------------------------------------------------------------------------------------------------------------------------------------------------------------------------------------------------------------------------------------------------------------------------------------------------------------------------------------------------------------------------------------------------------------------------------------------------------------------------------------------------------------------------------------------------------------------------------------------------------------------------------------------------------------------------------------------------------------------------------------------------------------------------------------------------------------------------------------------------------------------------------------------------------------------------------------------------------------------------------------------------------------------------------------|
| SF3B3 | ENSOARGO(slicing) | <p>miR-206, miR-154-3p, miR-2284q, miR-22-5p, miR-885-5p, miR-181d-5p, miR-452-5p, miR-2387, miR-3141, miR-181a-3p, miR-2319a, miR-2319b, miR-670-3p, miR-2404, miR-25, novel_103, miR-455-5p, miR-3141, miR-330-3p, miR-378a-5p, miR-483-3p, miR-6240, miR-382-3p, miR-574-3p, miR-668-3p, miR-432-3p, miR-539-3p, let-7j, miR-8485, miR-1298-5p, miR-1843b-5p, miR-181a-5p, miR-873a-5p, miR-653, miR-484, miR-1a-3p, miR-450c-3p, miR-197-3p, miR-455-5p, miR-330-3p, miR-2300a-5p, miR-187-3p, miR-665, miR-142-5p, miR-411-5p, miR-338-5p, miR-6740-5p, miR-145a-3p, miR-3184-3p, miR-6128, miR-206-3p, miR-346, miR-142a-5p, miR-181c-5p, miR-181c-3p, miR-301, miR-3154, miR-154b-3p, miR-1827, miR-186-5p, miR-548o-3p, miR-487a-3p, miR-300-3p, miR-154b-5p, miR-216a-5p, miR-500a-5p, miR-181b-5p, miR-2484, miR-30b-3p, miR-487a, miR-1, miR-376a-5p, miR-192-3p, miR-2285b, miR-490-3p, miR-143-3p, novel_39, miR-200a, miR-1246, miR-2366, miR-1197-5p, miR-188-3p, miR-5703, miR-133a-3p, miR-485-3p, miR-483-3p, miR-487a-3p, novel_121, miR-450a-1-3p</p> <p>miR-29a-3p, miR-135b-5p, miR-216a-3p, miR-3591-3p, miR-199b-5p, novel_27, miR-211, miR-758-5p, miR-29c-3p, miR-135a-2-3p, miR-147-5p, miR-29a, novel_1, miR-382-5p, miR-502-5p, miR-544b, miR-2284d, miR-26a-2-3p, miR-138, miR-29b, miR-2284ab, novel_23, miR-22-3p, miR-542-3p, miR-1285, miR-181a-5p, miR-653, miR-539-3p, miR-2284l, miR-382, miR-6240, miR-380-5p, miR-660, miR-2284n, miR-199a-5p, miR-300-3p, miR-2355-5p, miR-487a-3p, novel_48, miR-23b, miR-2448-3p, miR-301, miR-30e-5p, miR-488-3p, miR-323-3p, miR-2284v, miR-204-5p, miR-138-5p, miR-409-3p, miR-135a-5p, miR-29b-3p, miR-2284k, miR-2284z, miR-758-5p, miR-9-5p, miR-128-3p, miR-155-5p, miR-30a-5p, miR-29d-3p, miR-3591-5p, miR-199a-5p, miR-380-5p, miR-29b-2-5p, miR-181b-5p, miR-450a-2-3p, miR-30f, miR-203-3p, miR-2483-3p, miR-7857-3p, miR-499a-3p, miR-211-5p, miR-20a-3p, miR-544-5p, miR-129b-5p, miR-199b-5p, miR-9-5p, miR-181d-5p, miR-2284j, miR-154-3p, miR-126a-5p, miR-2284aa, miR-16-2-3p, miR-544a, miR-2426, miR-450b-5p, miR-125b-2-3p, miR-143-5p, miR-3187-3p, miR-23a-3p, miR-494-3p, miR-199b-5p, miR-29b-1-5p, miR-155-5p, miR-22-3p, miR-656-3p, miR-544-3p, miR-499b-3p, miR-552-3p, miR-21-3p, miR-154a-3p, miR-548o-3p, miR-660-5p, miR-625-5p, miR-543-3p, miR-154b-3p, miR-181c-5p, miR-6525, miR-665-5p, miR-155-5p, miR-29b-2-5p, miR-532-3p, miR-340-5p, miR-23c, miR-487a-3p, miR-23b-3p, miR-485-3p, miR-380-5p, miR-664-5p, miR-142-3p, miR-140-3p, miR-188-3p, miR-29b-1-5p, miR-421-5p, miR-487a, miR-216c-5p, miR-3653-3p, miR-2284m, miR-196a-3p</p> |
| SIRT1 | ENSOARGO(sirtuin) |                                                                                                                                                                                                                                                                                                                                                                                                                                                                                                                                                                                                                                                                                                                                                                                                                                                                                                                                                                                                                                                                                                                                                                                                                                                                                                                                                                                                                                                                                                                                                                                                                                                                                                                                                                                                                                                                                                                                                                                                                                                                                                                                                                                                                                                                                                                                                                                                                                                                                                                                                                                                                                                              |

miR-217-5p, miR-193b-5p, miR-16-1-3p, miR-184-3p, miR-30d-3p, miR-106a, miR-7859, miR-210-5p, miR-26a-5p, miR-202-5p, miR-503-5p, miR-486-3p, miR-376a-5p, miR-411, miR-433-3p, miR-1827, miR-543-3p, miR-339b, miR-552-3p, miR-548o-3p, miR-15b-5p, miR-582-5p, miR-377-3p, miR-10a, miR-665, miR-30a-3p, miR-30e-3p, miR-2285j, miR-130b-5p, miR-129-5p, miR-451a, miR-3074-5p, miR-3184-3p, miR-769-5p, miR-758-3p, miR-541, miR-329-3p, miR-362-3p, miR-1343-3p, miR-330-3p, miR-1185-3p, miR-455-3p, miR-147a, miR-153, miR-16b, miR-103a-2-5p, miR-153-3p, miR-146b, miR-101b-3p, miR-124a, miR-1b-5p, miR-378j, miR-221, miR-544-5p, miR-136-5p, miR-211-5p, miR-4792, miR-139-5p, miR-1185-2-3p, miR-4443, miR-203-3p, miR-25, miR-218-5p, miR-3968, miR-3956-3p, miR-2447, miR-877-3p, miR-1343-5p, miR-155-5p, novel\_79, miR-429-3p, miR-2285ad, miR-322-5p, miR-3071-3p, miR-30f, miR-205-5p, miR-200a-3p, miR-3064-5p, miR-29a-5p, miR-148b-5p, miR-1248, miR-20b-5p, miR-329a, miR-2318, novel\_9, miR-16-5p, novel\_42, miR-2113, miR-27b-3p, miR-497-5p, miR-16-1-3p, miR-16b, miR-339-5p, miR-31-5p, miR-194a, miR-146a, miR-377-3p, miR-378a-5p, miR-628-5p, let-7f-2-3p, let-7f-2-3p, miR-668-3p, miR-6240, miR-146b-5p, miR-2319a, miR-26b-5p, miR-3074-5p, miR-144-3p, miR-374c-3p, miR-576-3p, miR-28c, miR-140-3p, miR-1197-5p, miR-5703, miR-124-3p, miR-2904, miR-362-3p, miR-2300b-3p, miR-3600, miR-548e-3p, novel\_83, miR-15a-5p, miR-222-5p, miR-383-5p, miR-185-3p, miR-374a-5p, miR-466i-5p, miR-106a, miR-20a, miR-183-5p, miR-146a-5p, novel\_99, miR-582-5p, miR-370-5p, miR-140-5p, miR-155-5p, miR-204-3p, miR-323-5p, miR-139-5p, miR-544-3p, miR-320e, miR-338-5p, miR-324-3p, miR-222-3p, miR-208b-5p, miR-708-5p, miR-424-5p, miR-17-3p, miR-6516-3p, miR-155-5p, miR-539-5p, miR-10b-5p, miR-30b-3p, miR-10b, miR-484, miR-101a-5p, miR-450b-5p, miR-544a, miR-432-3p, miR-664b-3p, miR-155-5p, miR-2319b, miR-124a, miR-214, miR-155-5p, miR-214-3p, miR-128-3p, miR-30b-3p, miR-155-5p, miR-3071-5p, miR-216a-3p, miR-132-5p, miR-124-3p, miR-7144-5p, miR-7975, miR-877-3p, miR-33b-3p, miR-329b, miR-5703, miR-345-3p, miR-154b-5p, miR-300-3p, miR-483-3p, miR-142-3p, miR-541-5p, miR-329-5p, miR-490-5p, miR-3958-3p, miR-483-3p, miR-664a, miR-2411-3p, miR-345-3p, novel\_17, miR-8095, miR-2285b, miR-2428, miR-130a-5p, miR-142a-3p, miR-2285x, miR-329a-5p

STARD6 ENSOARGO(StAR-rel:200a-3p, miR-3064-5p, miR-29a-5p, miR-148b-5p, miR-1248, miR-20b-5p, miR-329a, miR-2318, novel\_9, miR-16-5p, novel\_42, miR-2113, miR-27b-3p, miR-497-5p, miR-16-1-3p, miR-16b, miR-339-5p, miR-31-5p, miR-194a, miR-146a, miR-377-3p, miR-378a-5p, miR-628-5p, let-7f-2-3p, let-7f-2-3p, miR-668-3p, miR-6240, miR-146b-5p, miR-2319a, miR-26b-5p, miR-3074-5p, miR-144-3p, miR-374c-3p, miR-576-3p, miR-28c, miR-140-3p, miR-1197-5p, miR-5703, miR-124-3p, miR-2904, miR-362-3p, miR-2300b-3p, miR-3600, miR-548e-3p, novel\_83, miR-15a-5p, miR-222-5p, miR-383-5p, miR-185-3p, miR-374a-5p, miR-466i-5p, miR-106a, miR-20a, miR-183-5p, miR-146a-5p, novel\_99, miR-582-5p, miR-370-5p, miR-140-5p, miR-155-5p, miR-204-3p, miR-323-5p, miR-139-5p, miR-544-3p, miR-320e, miR-338-5p, miR-324-3p, miR-222-3p, miR-208b-5p, miR-708-5p, miR-424-5p, miR-17-3p, miR-6516-3p, miR-155-5p, miR-539-5p, miR-10b-5p, miR-30b-3p, miR-10b, miR-484, miR-101a-5p, miR-450b-5p, miR-544a, miR-432-3p, miR-664b-3p, miR-155-5p, miR-2319b, miR-124a, miR-

CTDSP2 ENSOARGO(CTD (car:214, miR-155-5p, miR-214-3p, miR-128-3p, miR-30b-3p, miR-155-5p, miR-3071-5p, miR-216a-3p, miR-132-5p, miR-124-3p, miR-7144-5p, miR-7975, miR-877-3p, miR-33b-3p, miR-329b, miR-5703, miR-345-3p, miR-154b-5p, miR-300-3p, miR-483-3p, miR-142-3p, miR-541-5p, miR-329-5p, miR-490-5p, miR-3958-3p, miR-

SYT11 ENSOARGO(synaptot:483-3p, miR-664a, miR-2411-3p, miR-345-3p, novel\_17, miR-8095, miR-2285b, miR-2428, miR-130a-5p, miR-142a-3p, miR-2285x, miR-329a-5p

miR-24-3p, novel\_27, miR-449a, miR-423-5p, miR-541-3p, let-7i-3p, miR-3957-3p, miR-4726-5p, miR-2440, miR-28c, miR-576-3p, miR-769-5p, miR-34c, miR-34b, miR-4443, miR-320b, miR-504, miR-96-5p, miR-1291, miR-6395, miR-335-3p, miR-9851-3p, miR-3141, miR-150-5p, miR-1306, miR-668-3p, miR-25-5p, miR-124-5p, miR-214-3p, miR-125a-5p, miR-1343-5p, miR-1306-5p, miR-5126, miR-3141, novel\_19, miR-496-5p, miR-2459, miR-194-3p, miR-744-5p, miR-541, miR-296-5p, miR-1197-3p, miR-769-5p, miR-3184-5p, miR-4510, miR-129-2-3p, miR-214, miR-1271, miR-28-5p, miR-486b-3p, miR-708-5p, miR-665, miR-331-3p, miR-125b-5p, miR-132-5p, miR-6130, miR-769, miR-132-5p, miR-34c-5p, miR-27a-5p, miR-504-5p, miR-2331-3p, miR-1271, miR-125a, miR-671-5p, miR-885-3p, miR-129b-3p, miR-28b, miR-2411, miR-486-3p, novel\_39, miR-466i-5p, miR-127-5p, miR-191-3p, miR-34b-5p, miR-125b, miR-122-3p, miR-324-3p, miR-2411-5p, miR-1271-5p, miR-302a-5p, miR-328-3p, miR-129-1-3p, miR-532-3p, miR-6517, miR-1224-5p, miR-184-3p, miR-885-3p, miR-34a-5p, miR-5703, miR-188-3p, miR-140-3p, miR-1343-5p, miR-2904, miR-338-3p, miR-3958-5p, miR-214, miR-4510, miR-130b-5p, miR-450b-3p, miR-664a, miR-487b-5p, miR-17-3p, miR-665, miR-29b-2-5p, miR-2285j, miR-376e-3p, miR-6516, miR-323-5p, miR-193b-3p, miR-216b-5p, miR-6130, miR-139-5p, miR-154a-3p, miR-296-3p, miR-552-3p, miR-221-5p, miR-140-5p, miR-545-3p, miR-504-5p, novel\_99, miR-1827, miR-154b-3p, miR-30f, miR-30d-5p, miR-21a-3p, miR-2285c, miR-450a-1-3p, miR-2424, miR-377-5p, miR-376c-3p, miR-345-3p, miR-487a, miR-34b-5p, miR-30d, miR-221-5p, miR-299-3p, miR-760-3p, miR-92a-1-5p, miR-30b, novel\_83, miR-616-3p, miR-328-3p, miR-487a-3p, miR-340-5p, miR-30d-3p, miR-485-3p, miR-218-1-3p, miR-34a-5p, miR-30c-5p, miR-1246, miR-8095, miR-452-5p, miR-212-3p, miR-490-5p, miR-154-3p, miR-2285y, miR-30b-5p, miR-2440, miR-4443, miR-3596, miR-378g, miR-2285u, miR-541-5p, miR-7977, miR-664b, miR-139-5p, miR-20a-3p, miR-2319b, miR-544-5p, miR-504, miR-378j, miR-140-5p, miR-8485, miR-3187-3p, miR-193a, miR-744-3p, miR-652-5p, miR-2330-5p, miR-214-3p, miR-487b-5p, miR-3955-3p, miR-505, miR-216a-3p, miR-2459, miR-2285e, miR-3120-5p, miR-1388-5p, miR-450b-5p, miR-145-3p, miR-1260b, miR-374a-3p, miR-6128, miR-134-5p, miR-374b-3p, miR-135a-5p, miR-135a-1-3p, miR-5100, miR-154b-5p, miR-376c-3p, miR-34c-5p, miR-300-3p, miR-331-5p, miR-487a-3p, miR-874-3p, miR-7144-5p, miR-329b, miR-3154, miR-381-3p, miR-30e-5p, miR-2448-3p, miR-29a-5p, miR-192-3p, miR-2284a, miR-1271-3p, miR-2285b, miR-380-5p, miR-29b-2-5p, miR-17-3p, miR-191-3p, miR-1260a, miR-664-3p, miR-6119-5p, miR-545-5p, miR-134-5p, miR-450a-1-3p, novel\_121, miR-486-5p, miR-6516-5p, miR-2285ad, miR-299a-3p, miR-30c, miR-300, miR-2427, miR-218-2-3p, miR-30a-5p, miR-134, miR-449a, miR-371b-3p, miR-193b-3p, miR-17-3p, miR-495-3p, miR-2285x, miR-34c, miR-2404, miR-323a-5p, miR-299b-3p, novel\_69, miR-34b, miR-3120-3p, novel\_68, miR-125b-5p, miR-

TTYH3 ENSOARGO(tweety) f.

ANKRA2 ENSOARGO(ankyrin)

|         |                    |                                                                                                                                                                                                                                                                                                                                                                                                                                                                                                                                                                                                                                                                                                                                                                                                                                                                                                                                                                                                                                                                                                                                                                                                                                                                                                                                                                                                                                                                                                                                                                                                                                                                                                                                                                                                                                                                                                                                                                                                                                                                                                                                                                                                                                                                                                                                                                                                                                                                                                                                                                                                                                                                                                                                                                                                                                                                                                                                                                                                                                                              |
|---------|--------------------|--------------------------------------------------------------------------------------------------------------------------------------------------------------------------------------------------------------------------------------------------------------------------------------------------------------------------------------------------------------------------------------------------------------------------------------------------------------------------------------------------------------------------------------------------------------------------------------------------------------------------------------------------------------------------------------------------------------------------------------------------------------------------------------------------------------------------------------------------------------------------------------------------------------------------------------------------------------------------------------------------------------------------------------------------------------------------------------------------------------------------------------------------------------------------------------------------------------------------------------------------------------------------------------------------------------------------------------------------------------------------------------------------------------------------------------------------------------------------------------------------------------------------------------------------------------------------------------------------------------------------------------------------------------------------------------------------------------------------------------------------------------------------------------------------------------------------------------------------------------------------------------------------------------------------------------------------------------------------------------------------------------------------------------------------------------------------------------------------------------------------------------------------------------------------------------------------------------------------------------------------------------------------------------------------------------------------------------------------------------------------------------------------------------------------------------------------------------------------------------------------------------------------------------------------------------------------------------------------------------------------------------------------------------------------------------------------------------------------------------------------------------------------------------------------------------------------------------------------------------------------------------------------------------------------------------------------------------------------------------------------------------------------------------------------------------|
| NRD1    | ENSOARGO(nardily)  | miR-196a-5p, miR-2284r, miR-148a-3p, miR-378j, miR-3962, miR-129b-5p, miR-216a-3p, miR-19a-3p, miR-19b-3p, miR-128-3p, miR-671-5p, miR-130a-3p, miR-301a-3p, miR-3431, miR-142-3p, miR-148b-3p, miR-133c, miR-199a-3p, miR-199a-3p, miR-100-3p, miR-485-3p, miR-17-3p, miR-196b-5p, miR-130b-3p, miR-17-3p, miR-454-3p, miR-208b-5p, miR-152-3p, miR-17-3p, miR-142a-3p, miR-301b-3p<br>miR-382, miR-3529-3p, miR-4510, miR-3187-3p, miR-2284y, miR-664b-3p, miR-382-5p, miR-219b-5p, miR-500a-5p, miR-142b, miR-421-5p, miR-452-5p, miR-378a-5p, miR-21-3p, miR-1224-5p, miR-3600, miR-2355-3p, miR-203-3p, miR-323-5p, miR-6130, miR-582-5p, miR-323a-5p, miR-3065-5p, miR-5703, miR-3591-3p, miR-877-3p, miR-186-5p, miR-582-5p, miR-2284u, miR-543-3p<br>novel_9, novel_1, miR-2285j, miR-135a-5p, miR-1307-3p, miR-145-3p, let-7g-3p, miR-10b-3p, let-7g-3p, miR-136-5p, miR-2319a, miR-1814c, miR-376a-2-5p, miR-1248, miR-135b-5p, miR-598-3p, miR-433-3p, miR-25, miR-133c, miR-2319b, miR-598-3p, miR-760-3p, miR-2285af, miR-29b-1-5p, miR-197-5p, miR-29b-1-5p, miR-376a-5p, let-7a-2-3p, miR-2310, miR-2887, let-7a-2-3p, miR-484, miR-218-2-3p, novel_78<br>miR-199b-5p, miR-29c-3p, miR-6119-3p, miR-379-3p, miR-29a, miR-320c, miR-411b-3p, novel_68, miR-3074-5p, miR-146b-5p, miR-378f, miR-150-5p, miR-1306, miR-3065-5p, miR-3591-3p, miR-503-3p, miR-2285r, miR-432-3p, miR-2284l, miR-432-3p, miR-668-3p, let-7f-2-3p, let-7f-2-3p, miR-6240, miR-378a-5p, novel_51, miR-2411-3p, miR-146a, miR-194-3p, miR-149-5p, miR-411-5p, miR-134-3p, miR-3431, miR-339-5p, miR-3955-5p, miR-103a-3p, miR-497-5p, miR-2284x, miR-16b, miR-16-1-3p, miR-450c-3p, miR-22-3p, miR-197-3p, novel_23, miR-432, miR-223-3p, miR-193a-5p, miR-16-5p, miR-2284v, miR-134-5p, miR-100-3p, miR-2284k, miR-2433, miR-133c, miR-25-3p, miR-2355-5p, miR-2285aa, miR-1248, miR-345-5p, miR-424-3p, miR-301, novel_39, miR-2285b, miR-450b-5p, miR-148b-5p, miR-92b-3p, novel_127, miR-219-3p, miR-450a-1-3p, miR-2284z, miR-134-5p, miR-322-5p, miR-758-5p, novel_79, miR-18b-5p, miR-2285ad, miR-330-5p, miR-1285-5p, miR-423-5p, miR-877-3p, miR-2284j, miR-2447, miR-3956-3p, miR-363-3p, miR-3968, novel_82, miR-2440, miR-1185-2-3p, miR-378g, miR-25, miR-139-5p, miR-9-3p, miR-504, miR-378j, miR-1306-3p, miR-1b-5p, miR-378d, miR-744-3p, miR-124a, miR-146b, miR-199b-5p, miR-214-3p, miR-103a-2-5p, miR-29b-1-5p, miR-323b-3p, miR-16b, miR-199a-3p, miR-455-3p, miR-1185-3p, miR-539-5p, miR-147a, miR-199b-3p, novel_78, miR-330-3p, miR-1388-5p, miR-323b, miR-2284r, miR-3184-5p, miR-224-5p, miR-214, miR-665-5p, miR-3074-5p, miR-3184-3p, miR-4492, miR-129-5p, miR-130b-5p, miR-219b-3p, miR-15b-5p, miR-10a, miR-582-5p, miR-296-3p, miR-2331-3p, miR-504-5p, miR-186-5p, miR-339b, miR-345-5p, miR-129b-3p, miR-411, miR-450a-1-3p, miR-664b-3p, miR-2484, miR-202-5p, miR-324-3p, miR-422a, miR-345-3p, miR-92a-1-5p, novel_17, miR-210-3p, miR-23b-3p, miR-23c, miR-212-5p, miR-18a-3p, miR-16-1-3p, miR-664-5p, miR-133a-3p, miR-378a- |
| TM4SF18 | ENSOARGO(transmem) |                                                                                                                                                                                                                                                                                                                                                                                                                                                                                                                                                                                                                                                                                                                                                                                                                                                                                                                                                                                                                                                                                                                                                                                                                                                                                                                                                                                                                                                                                                                                                                                                                                                                                                                                                                                                                                                                                                                                                                                                                                                                                                                                                                                                                                                                                                                                                                                                                                                                                                                                                                                                                                                                                                                                                                                                                                                                                                                                                                                                                                                              |
| FGF14   | ENSOARGO(fibrobla) |                                                                                                                                                                                                                                                                                                                                                                                                                                                                                                                                                                                                                                                                                                                                                                                                                                                                                                                                                                                                                                                                                                                                                                                                                                                                                                                                                                                                                                                                                                                                                                                                                                                                                                                                                                                                                                                                                                                                                                                                                                                                                                                                                                                                                                                                                                                                                                                                                                                                                                                                                                                                                                                                                                                                                                                                                                                                                                                                                                                                                                                              |
| ETV2    | ENSOARGO(ets vari) |                                                                                                                                                                                                                                                                                                                                                                                                                                                                                                                                                                                                                                                                                                                                                                                                                                                                                                                                                                                                                                                                                                                                                                                                                                                                                                                                                                                                                                                                                                                                                                                                                                                                                                                                                                                                                                                                                                                                                                                                                                                                                                                                                                                                                                                                                                                                                                                                                                                                                                                                                                                                                                                                                                                                                                                                                                                                                                                                                                                                                                                              |





miR-228bad, miR-429-3p, miR-758-5p, miR-2284z, miR-450a-1-3p, novel\_121, miR-3591-5p, miR-885-3p, miR-29a-5p, novel\_39, miR-2284y, miR-2285b, miR-30f, miR-127-5p, novel\_96, miR-503-3p, miR-2285aa, miR-300-3p, miR-3959-5p, miR-133c, miR-200a-5p, miR-23b, miR-329a, miR-1248, miR-2284v, miR-1260b, miR-1197-3p, miR-2284k, miR-6740-5p, novel\_9, miR-103a-3p, miR-411-5p, miR-194-3p, miR-1843b-5p, miR-450c-3p, miR-380-5p, miR-493-5p, miR-432-3p, miR-432-3p, miR-146a, miR-194a, miR-2411-3p, miR-483-3p, miR-378a-5p, miR-411b-3p, miR-144-3p, miR-320c, miR-150-5p, miR-1306, miR-3591-3p, miR-146b-5p, miR-199b-5p, miR-301b-3p, miR-142b, miR-576-3p, miR-6123, miR-30d-3p, miR-23b-3p, miR-23c, miR-2284h-5p, miR-193b-5p, miR-98-3p, miR-1434-5p, miR-493-3p, miR-2284u, miR-2285w, miR-664b-3p, miR-486-3p, miR-2285p, miR-210-5p, miR-618, miR-324-3p, miR-219b-5p, miR-345-3p, miR-202-5p, miR-504-5p, miR-2331-3p, miR-30c-1-3p, miR-301a-3p, miR-10a, miR-450a-1-3p, miR-2285c, miR-655, miR-885-3p, miR-625-5p, miR-186-5p, miR-98-3p, miR-3184-5p, let-7b-3p, miR-30a-3p, novel\_74, miR-454-3p, miR-4492, miR-548w, miR-455-3p, miR-2459, miR-329-3p, miR-362-3p, miR-1388-5p, miR-101c, miR-124a, miR-101b-3p, miR-23a-3p, miR-2284b, miR-1b-5p, miR-29b-1-5p, miR-323b-3p, miR-1185-5p, miR-491-5p, miR-130b-3p, miR-199b-5p, miR-146b, miR-139-5p, miR-2284g, miR-4792, miR-211-5p, miR-2483-3p, miR-504, miR-493-5p, miR-3956-3p, miR-2284j, miR-423-5p, miR-7705, miR-222, miR-376a-5p, miR-483-3p, miR-345-3p, miR-3578, miR-200b-3p, miR-496, miR-10a-5p, miR-30a-3p, miR-29b-2-5p, miR-181a-2-3p, miR-380-5p, miR-199a-5p, miR-2284a, miR-2285af, miR-1260a, miR-200c, miR-6119-5p, miR-30c-2-3p, miR-200c-3p, miR-107, miR-370-3p, miR-215-5p, miR-199a-5p, miR-2284n, miR-2448-3p, miR-3154, miR-320a, novel\_48, miR-125a-1-3p, miR-144, miR-128-5p, miR-204, miR-340-3p, novel\_78, miR-330-3p, miR-2300a-5p, miR-1343-3p, novel\_116, miR-503-5p, miR-134-3p, miR-30b-3p, miR-329-3p, miR-296-5p, miR-7862, miR-362-3p, miR-30b-3p, miR-1388-3p, miR-6240, miR-4532, let-7a-2-3p, miR-330-3p, novel\_19, miR-362-3p, novel\_51, miR-503-5p, miR-320b, miR-5126, miR-125a-5p, miR-3085-3p, miR-2285u, miR-3120-3p, miR-3064-5p, miR-4792, miR-320c, miR-323a-5p, miR-378g, miR-411b-3p, miR-150-5p, miR-3591-3p, miR-18b, miR-148a-3p, miR-7975, miR-504, miR-423-5p, miR-2428, miR-24-3p, miR-2285y, miR-4324, miR-2285n, miR-1247-3p, miR-128-1-5p, miR-18b-5p, miR-2285ad, miR-3960, miR-2284h-5p, miR-505-5p, miR-148b-3p, miR-2904, miR-7134-5p, novel\_133, miR-362-3p, let-7a-2-3p, miR-941, miR-4429, miR-3064-5p, miR-2887, miR-4286, miR-2285w, miR-503-5p, miR-486-3p, miR-3065-3p, miR-2432, miR-1271-3p, miR-125b, miR-185-3p, miR-30b-3p, miR-152-3p, miR-320d, miR-3065-3p, miR-598-3p, miR-21-3p, miR-125a, miR-504-5p, miR-27a-5p, miR-323-5p, miR-598-3p, miR-320a, miR-18a, miR-21a-3p, miR-488-3p, miR-671-5p, let-7g-3p, miR-329a, miR-18a-5p, miR-433-5p, miR-3184-3p, miR-3184-5p, miR-6525, miR-346, miR-1197-3p, miR-125b-5p, miR-665, miR-2433, miR-4492, miR-486b-3p

TMEM171 ENSOARGO( transmem

RUVBL1 ENSOARGO( RuvB-lik

miR-30d-5p, miR-3141, miR-671-5p, miR-30f, miR-211-5p, miR-370-5p, miR-30c-1-3p, miR-3064-5p, miR-4792, miR-669, miR-331-3p, miR-151-3p, miR-142b, miR-370-5p, miR-30b-5p, miR-204-5p, miR-4492, miR-1193, miR-3607-3p, miR-24-3p, miR-211, miR-142a-5p, miR-877-3p, miR-217-5p, miR-7b-5p, miR-1285, miR-542-3p, miR-30c-5p, miR-548w, miR-151a-3p, miR-194-3p, miR-142-5p, miR-217, miR-3141, miR-219b-5p, miR-30c-2-3p, miR-210-5p, miR-7-5p, miR-205-5p, miR-30d, miR-3085-3p, miR-3064-5p, miR-1388-3p, miR-29a-5p, miR-30c-1-3p, miR-484, miR-296-5p, miR-30b-3p, miR-450b-5p, miR-544a, miR-2426, miR-2300a-5p, miR-216a-3p, miR-9788-3p, miR-1306-5p, miR-5126, miR-326, miR-362-3p, miR-3085-3p, miR-25-5p, miR-2330-5p, miR-106a-5p, let-7c-3p, miR-30c-1-3p, miR-361-3p, miR-199b-5p, novel\_94, miR-877-3p, miR-3064-5p, miR-20a-3p, miR-499b-5p, miR-489, miR-454-5p, miR-2285n, miR-769-5p, miR-2285y, miR-107-5p, miR-4726-5p, miR-2285t, miR-2284q, miR-541-3p, miR-502-3p, miR-154a, miR-126-3p, novel\_133, miR-362-3p, miR-376a-5p, miR-124-3p, miR-1197-5p, miR-19b-3p, miR-378d, miR-3960, miR-148b-3p, miR-532-3p, miR-199a-3p, miR-185-3p, miR-125b, miR-106a, miR-760-3p, miR-466i-5p, miR-34b-5p, miR-30b-3p, miR-221-5p, miR-21-3p, miR-20a, miR-29b-1-5p, miR-146a-5p, miR-21a-3p, miR-18a-5p, miR-140-5p, miR-221-5p, miR-660-5p, miR-370-5p, miR-544-3p, miR-6130, miR-193b-3p, novel\_25, miR-19b-1-5p, miR-324-3p, miR-29b-2-5p, miR-338-5p, miR-6516-3p, miR-664a, miR-708-5p, miR-145a-3p, miR-4510, miR-1271, miR-3074-2-3p, miR-206-3p, miR-6134, miR-1434-3p, miR-1285, miR-145a-5p, miR-30b-3p, miR-1260b, miR-744-5p, miR-130a-3p, miR-26b-3p, miR-503-5p, miR-544b, miR-20b, miR-224-5p, miR-503-5p, miR-197-5p, miR-106a-5p, miR-17-5p, miR-124-5p, miR-452-5p, miR-125a-5p, miR-660, miR-1343-5p, miR-363-5p, miR-296-3p, miR-345-5p, miR-18b, miR-18a-3p, miR-1291, miR-19a-3p, miR-7975, miR-9851-3p, miR-378b, miR-320b, miR-2404, miR-670-3p, miR-34b, miR-20a-5p, miR-34c, miR-33a-3p, miR-502b, miR-199c, miR-135a-2-3p, novel\_101, miR-1193, miR-24-3p, novel\_27, miR-449a, miR-326-3p, miR-2428, miR-345-3p, miR-3578, miR-501-3p, miR-411-3p, miR-7641, miR-1271-5p, miR-483-3p, miR-214-5p, miR-1260a, miR-30c-2-3p, miR-2898, miR-543-5p, miR-29b-2-5p, miR-1, miR-495-5p, miR-181a-2-3p, miR-380-5p, miR-28b, miR-24-2-5p, miR-2478, miR-199a-5p, miR-190-3p, miR-1271-3p, miR-188-

NF2 ENSOARGO( neurofib

KMT2B ENSOARGO( lysine (

miR-118-5p, miR-218a-5p, miR-218c-5p, miR-228, miR-218c-5p, miR-2285w, miR-1277-5p, miR-221-5p, miR-106a, miR-320d, miR-466i-5p, miR-219b-5p, miR-92a-1-5p, miR-345-3p, miR-2285p, miR-2284h-5p, miR-148b-3p, miR-106a, miR-16-1-3p, miR-361-5p, miR-4429, miR-2904, miR-5703, miR-362-3p, miR-215-5p, miR-338-3p, miR-224-5p, miR-425-5p, miR-665-5p, miR-539-5p, miR-145a-3p, miR-3074-5p, miR-708-5p, miR-454-3p, miR-190a-5p, novel\_74, miR-450b-3p, miR-6516-3p, miR-151-3p, miR-219b-3p, miR-324-3p, miR-301a-3p, miR-376e-3p, miR-192-5p, miR-377-3p, miR-139-5p, miR-216b-3p, miR-532-5p, miR-182-5p, miR-221-5p, miR-30c-1-3p, miR-625-5p, let-7g-3p, miR-433-3p, miR-21a-3p, miR-450a-1-3p, miR-8485, miR-30c-1-3p, miR-106a-5p, miR-494-3p, miR-101b-3p, miR-130b-3p, miR-362-3p, miR-2957, miR-106b-5p, miR-182-5p, miR-320b, miR-342, novel\_115, miR-9788-3p, miR-148b-5p, miR-455-3p, miR-27a-3p, miR-151a-3p, miR-105-1, miR-101c, miR-1839-5p, miR-16-2-3p, miR-362-3p, miR-30b-3p, miR-329-3p, miR-6529a, miR-9-3p, miR-8095, miR-219a-2-3p, miR-361-3p, miR-452-5p, miR-190b-5p, miR-490-5p, miR-2285t, miR-628-3p, miR-3968, miR-218-5p, miR-101-3p, miR-27a-3p, miR-378g, miR-2483-3p, miR-541-5p, miR-139-5p, miR-2319b, miR-452-3p, miR-493-5p, miR-9-3p, novel\_94, miR-136-5p, novel\_39, miR-200a, miR-3529-3p, miR-200a-3p, miR-152-3p, miR-127-5p, miR-200c-3p, miR-3071-3p, miR-30c-2-3p, miR-2285af, miR-200c, miR-125a-3p, miR-219-3p, miR-450a-1-3p, miR-134-5p, novel\_121, miR-486-5p, miR-758-5p, miR-429-3p, miR-105-2, miR-29d-3p, miR-345-3p, miR-134, miR-93, miR-103b, miR-410-3p, miR-134-5p, miR-28-5p, miR-144, miR-331-3p, miR-29b-3p, miR-2332, miR-5100, miR-376c-3p, miR-141-3p, miR-215-5p, miR-574-5p, miR-20b-5p, miR-7144-5p, miR-10b-3p, miR-329a, miR-93-5p, miR-200a-5p, miR-320a, miR-17-5p, miR-3154, miR-488-3p, let-7j, miR-296-3p, miR-

CCDC68

ENSOARGO(coiled-coiled) domain protein 68

miR-3074-5p, miR-378b, miR-10a-5p, miR-655-5p, miR-299b-3p, miR-374c-3p, miR-29a-3p, miR-146b-3p, miR-669, miR-320c, miR-3141, miR-378b, miR-18a-3p, miR-1306, miR-378f, miR-146b-5p, miR-2319a, miR-335-5p, miR-219b-3p, novel\_101, miR-542-5p, miR-29c-3p, miR-193b-3p, miR-24-3p, miR-2284w, miR-326-3p, miR-374c-5p, miR-206, novel\_1, miR-29a, miR-203b-5p, miR-340-3p, miR-412-5p, miR-432-5p, miR-2355-3p, novel\_116, miR-1434-3p, miR-1843b-5p, miR-432, novel\_23, miR-1260b, miR-29b, miR-30b-3p, miR-380-3p, miR-744-5p, miR-6240, miR-628-5p, miR-363-5p, miR-2284l, miR-2285r, miR-345-5p, miR-146a, miR-224-5p, novel\_51, miR-3141, miR-330-3p, miR-124-5p, miR-378a-5p, miR-193a-3p, miR-452-5p, miR-542-5p, miR-2285aa, miR-223-5p, miR-301, miR-362-5p, miR-3154, miR-320a, miR-345-5p, miR-329b, miR-1248, miR-7144-5p, miR-193a-5p, miR-6128, miR-1260b, miR-500b-5p, miR-378c, miR-5100, miR-29b-3p, novel\_63, miR-331-3p, miR-100-3p, miR-6740-5p, miR-486b-3p, miR-6517, miR-299a-3p, miR-6516-5p, miR-378h, novel\_121, miR-486-5p, miR-2284z, miR-330-5p, miR-29d-3p, miR-885-3p, miR-10a-5p, miR-4286, miR-1, miR-30a-3p, miR-3956-5p, miR-1271-3p, miR-3065-3p, novel\_39, miR-29a-5p, miR-2285af, miR-1260a, miR-127-5p, miR-1a-2-5p, miR-2898, miR-543-5p, novel\_127, miR-10b, miR-2319b, miR-139-5p, miR-7977, miR-499b-5p, miR-3082-5p, miR-378e, miR-3596, miR-409-5p, miR-361-3p, miR-504, miR-136-5p, miR-877-3p, miR-335-3p, miR-1296-5p, miR-361-3p, miR-362-5p, miR-371a-5p, miR-335, miR-4726-5p, miR-3968, miR-2285t, miR-548w, novel\_4, miR-330-3p, miR-1298-3p, miR-496-5p, miR-500-5p, miR-10b, miR-2284r, miR-378b, miR-30b-3p, miR-758-3p, miR-323b, miR-1a-3p, miR-450b-5p, miR-378c, miR-2284aa, miR-2330-5p, miR-1388-3p, miR-23a-3p, miR-378d, miR-758-3p, miR-193a, miR-1532, miR-326, miR-1306-5p, miR-320h, miR-182, miR-496-3p, miR-503-3p, miR-376a-5p, miR-10b-3p, miR-302a-5p, miR-3082-5p, miR-496

NPAS4 ENSOARGO( neuronal

TTC21B ENSOARGO( tetraatri

miR-16a, miR-2284o, miR-382-5p, miR-15a, miR-4324, miR-576-3p, miR-6402, miR-142b, miR-2428, miR-2284w, miR-323c, miR-371b-3p, miR-193b-3p, miR-2285x, miR-1193, miR-342-3p, miR-135a-2-3p, miR-2319a, miR-195a-5p, miR-412-3p, miR-2284e, miR-3591-3p, miR-18a-3p, miR-2387, miR-148a-3p, miR-677, miR-181b-3p, miR-655-5p, miR-320b, miR-1343-5p, miR-660, miR-193a-3p, miR-124-5p, miR-330-3p, miR-365b-5p, miR-2411-3p, miR-224-5p, miR-296-3p, miR-296-3p, miR-503-3p, let-7a-2-3p, miR-2284l, miR-363-5p, miR-668-3p, miR-130b-5p, miR-6240, miR-497-5p, miR-2284x, miR-2284ab, miR-138, miR-16b, miR-450c-3p, miR-197-3p, miR-145a-5p, miR-374b-3p, miR-873a-5p, miR-1843b-5p, miR-181a-5p, miR-194-3p, miR-544b, miR-2284d, miR-412-5p, miR-134-3p, miR-339-5p, miR-486b-3p, miR-134-5p, miR-28-5p, miR-138-5p, miR-331-3p, miR-409-3p, miR-2284k, miR-5100, miR-370-5p, miR-135a-1-3p, miR-365a-5p, miR-193a-5p, miR-16-5p, miR-103b, novel\_42, miR-2284v, miR-7144-5p, miR-485-5p, miR-1814c, miR-1248, miR-876-3p, let-7g-3p, miR-154b-5p, miR-2284n, miR-2285aa, miR-874-3p, miR-152-3p, novel\_96, novel\_127, miR-2898, miR-181b-5p, miR-127-5p, miR-200c-3p, miR-30c-2-3p, miR-339a, miR-205-5p, miR-2285af, miR-200c, miR-664-3p, miR-2284y, miR-200a, miR-3065-3p, miR-29a-5p, miR-1271-3p, miR-490-3p, miR-2284a, miR-3064-5p, miR-4286, miR-2284f, miR-200b-3p, let-7a-2-3p, miR-1343-5p, miR-345-3p, miR-1290, miR-134, miR-450a-1-3p, miR-134-5p, miR-2284z, miR-129-1-3p, miR-486-5p, miR-322-5p, miR-6516-5p, miR-758-5p, miR-1224-5p, novel\_79, miR-429-3p, miR-423-3p, miR-4726-5p, miR-301a-5p, miR-423-5p, miR-154a, miR-877-3p, novel\_111, miR-2284j, miR-181d-5p, novel\_60, miR-3956-3p, miR-1983, miR-7857-3p, miR-378g, miR-3082-5p, miR-7977, miR-664b, miR-2284g, miR-3064-5p, miR-20a-3p, miR-214-3p, miR-3085-3p, miR-401-5p, miR-29b-1-5p, miR-16b, miR-

novel\_103, miR-16b, miR-106b-5p, miR-199b-5p, miR-1388-3p, miR-424-5p, miR-106a-5p, miR-652-5p, miR-378d, miR-378b, miR-143-5p, miR-378c, miR-544a, miR-3120-5p, miR-1343-3p, miR-2300a-5p, miR-548w, miR-27a-3p, miR-147a, miR-421, miR-2285e, miR-2285n, miR-382-3p, miR-371a-5p, miR-2284q, miR-2447, miR-885-5p, miR-2285f, miR-194b-5p, miR-361-3p, novel\_111, miR-423-5p, miR-8095, miR-140-5p, miR-199b-5p, miR-378j, miR-136-5p, novel\_94, miR-2319b, miR-541-5p, miR-7977, miR-378g, miR-378e, miR-203-3p, miR-4443, miR-27a-3p, miR-196a-3p, miR-324-3p, miR-125b, miR-185-3p, miR-422a, miR-106a, miR-202-5p, miR-466i-5p, miR-3653-3p, miR-2285w, miR-20a, miR-376a-5p, miR-421-5p, miR-125b-2-3p, miR-378i, miR-126-3p, miR-378a-3p, miR-5703, miR-142-3p, miR-33b-3p, miR-18a-3p, miR-106a, miR-505-3p, miR-383-5p, miR-340-5p, miR-15a-5p, miR-2284h-5p, miR-15b-3p, miR-320e, miR-378c, miR-129-2-3p, miR-145a-3p, miR-2330-3p, miR-6525, miR-3184-5p, miR-122-5p, miR-6134, miR-21a-3p, miR-299, miR-2285c, miR-411, miR-2312, miR-625-5p, miR-543-3p, miR-582-5p, novel\_99, miR-2331-3p, miR-378a-3p, miR-660-5p, miR-370-5p, miR-544-3p, miR-582-5p, miR-204-3p, miR-22-3p, miR-15b-5p, miR-7-5p, miR-194a, miR-455-5p, miR-106a-5p, miR-17-5p, miR-124-5p, miR-125a-5p, miR-660, miR-101-5p, miR-628-5p, miR-2285r, miR-653, miR-7b-5p, miR-1285, miR-22-3p, miR-194-5p, miR-3071-5p, miR-16b, miR-497-5p, miR-27b-3p, miR-455-5p, miR-2285g, miR-185-5p, miR-134-3p, miR-544b, miR-20b, miR-502-5p, miR-4324, miR-15a, miR-28c, miR-142b, miR-20a-5p, miR-16a, novel\_1, miR-1193, miR-2285m, miR-199b-5p, miR-2285ab, miR-150-5p, miR-3065-5p, miR-18a-3p, miR-1291, miR-2319a, miR-505-3p, miR-195a-5p, miR-378f, miR-7-1-3p, novel\_69, miR-3071-3p, miR-127-5p, novel\_127, miR-352a-

miR-1306-5p, miR-5126, miR-326, miR-16b, miR-2b-5p, miR-395b-3p, miR-130b-3p, novel\_124, miR-491-5p, miR-214-3p, miR-424-5p, miR-2330-5p, miR-33a-5p, miR-30c-1-3p, miR-758-3p, miR-4532, miR-2284r, miR-758-3p, miR-30b-3p, miR-412-3p, miR-2426, miR-101c, miR-105-1, miR-199b-3p, miR-2300a-5p, miR-222-5p, miR-5010-3p, miR-147a, miR-1298-3p, miR-1185-3p, miR-9788-3p, miR-2440, novel\_82, miR-2285n, miR-2284q, miR-490-5p, miR-2285t, miR-32-3p, miR-6527, novel\_111, miR-378j, miR-136-5p, miR-96-5p, miR-877-3p, miR-493-5p, miR-20a-3p, miR-664b, miR-541-5p, miR-2285u, miR-4443, miR-1185-2-3p, miR-203-3p, miR-2285p, miR-185-3p, miR-125b, miR-466i-5p, miR-30b-3p, miR-221-5p, miR-503-5p, miR-369-3p, miR-125b-2-3p, miR-376a-5p, miR-664b-3p, miR-2411, miR-2432, miR-376a-5p, miR-2300b-3p, miR-140-3p, miR-19b-3p, miR-18a-3p, miR-148b-3p, miR-15a-5p, miR-200b, miR-210-3p, miR-151-5p, miR-2285j, miR-665, miR-320e, miR-655-3p, miR-324-3p, miR-664a, miR-17-3p, miR-129-5p, miR-208b-5p, miR-454-3p, miR-424-5p, miR-4510, miR-539-5p, miR-214, miR-1271, novel\_44, miR-224-5p, miR-346, miR-6525, miR-6134, miR-655, miR-27b-5p, miR-18a-5p, let-7g-3p, miR-186-5p, miR-1827, miR-625-5p, miR-32-3p, miR-30c-1-3p, miR-221-5p, miR-552-3p, miR-216b-3p, miR-6130, miR-301a-3p, miR-6516, miR-27a-5p, miR-151b, miR-15b-5p, miR-7-5p, miR-224-5p, miR-503-5p, miR-455-5p, novel\_51, miR-105-5p, miR-2285l, miR-378a-5p, miR-126a-3p, miR-125a-5p, miR-493-5p, miR-668-3p, miR-363-5p, miR-1843b-5p, miR-7b-5p, miR-432, miR-3071-5p, miR-374b-3p, miR-30b-3p, miR-138, miR-16b, miR-455-5p, miR-744-5p, miR-497-5p, miR-31-5p, miR-26b-3p, miR-130a-3p, miR-503-5p, miR-185-5p, miR-432-5p, novel\_116, miR-411-5p, miR-4324, miR-15a, miR-1247-3p, miR-33a-3p, miR-16a, miR-6119-3p, miR-199c, miR-22-5p, miR-219b-3p, miR-495-3p, novel\_101, miR-17-3p, miR-371b-



miR-324-5p, miR-874-3p, miR-329a, miR-320a, miR-3154, miR-488-3p, miR-365a-5p, miR-2903, miR-193a-5p, miR-3969, miR-370-5p, miR-5100, novel\_63, miR-410-5p, novel\_121, miR-2284z, novel\_79, miR-6517, miR-299a-3p, miR-411-3p, miR-1343-5p, miR-1271-3p, miR-490-3p, miR-3065-3p, novel\_39, miR-24-2-5p, miR-4286, miR-3064-5p, miR-29b-2-5p, miR-3529-3p, novel\_96, miR-339a, miR-30c-2-3p, miR-219-3p, miR-664-3p, miR-320c, miR-299b-3p, miR-450b-3p, miR-3591-3p, miR-1306, novel\_27, miR-1193, miR-2285x, miR-147-5p, miR-203b-5p, miR-379-3p, miR-128-1-5p, miR-1247-3p, miR-544b, miR-185-5p, miR-377-5p, miR-339-5p, miR-133b-5p, miR-3955-5p, miR-340-3p, miR-31-5p, miR-188-5p, miR-744-5p, miR-2284x, miR-6412, miR-2285r, miR-363-5p, miR-130b-5p, miR-466f-3p, miR-1343-5p, novel\_51, miR-365b-5p, miR-204-3p, miR-27a-5p, miR-544-3p, miR-21-3p, miR-370-5p, miR-3065-3p, miR-140-5p, miR-30c-1-3p, miR-339b, miR-411, miR-6134, miR-346, miR-3074-2-3p, miR-145a-3p, miR-130b-5p, miR-29b-2-5p, miR-324-3p, miR-219b-3p, miR-2285j, miR-1247-5p, miR-3600, miR-4429, miR-1197-5p, miR-1434-5p, miR-124-3p, miR-2300b-3p, miR-362-3p, novel\_133, miR-130a-5p, miR-377-5p, miR-29b-1-5p, miR-183-5p, miR-299-3p, miR-30b-3p, miR-320d, miR-202-5p, miR-324-3p, miR-664b, miR-24-1-5p, miR-3064-5p, miR-9-3p, miR-219a-2-3p, miR-9-3p, miR-541-3p, miR-3059-5p, miR-2447, miR-1298-3p, novel\_4, miR-2284aa, miR-544a, miR-450b-5p, miR-2426, miR-362-3p, miR-125b-2-3p, miR-541, miR-329-3p, miR-8485, miR-193a, miR-3187-3p, miR-30c-1-3p, miR-124a, miR-25-5p, miR-491-5p, miR-3085-3p, miR-362-3p, miR-29b-1-5p, miR-1306-5p, miR-320b

PTDSS1 ENSOARGO( phosphat

miR-27a-3p, miR-299b-3p, miR-2285u, miR-296-3p, miR-10b, miR-329-5p, miR-452-3p, miR-299b-5p, miR-1306, miR-655, miR-299, miR-148a-3p, miR-424-3p, miR-452-5p, miR-22-5p, miR-107-5p, miR-655-3p, miR-2285n, novel\_83, miR-2459, miR-148b-3p, miR-196a-2-3p, miR-665, miR-5010-3p, miR-27a-3p, miR-299a-3p, miR-27b-3p, miR-299a-5p, miR-218-2-3p, miR-2300b-3p, miR-29a-5p, miR-296-3p, miR-4286, miR-103a-2-5p, miR-299-3p, miR-152-3p, miR-6536, miR-92a-1-5p, novel\_51, miR-196a-3p, novel\_103, miR-296-3p, miR-1306-5p

TNPO1 ENSOARGO( transpor

miR-411-3p, miR-582-3p, miR-10a-5p, miR-9-5p, miR-2285ad, miR-6517, miR-412, miR-450a-2-3p, miR-1a-2-5p, miR-2285af, miR-664-3p, miR-219-3p, miR-217, miR-2478, miR-3529-3p, miR-29b-2-5p, miR-1, miR-7144-5p, miR-376c-5p, miR-1248, miR-93-5p, miR-3154, miR-376c-5p, miR-23b, miR-362-5p, miR-34c-5p, miR-769, miR-133c, miR-2285aa, miR-125a, miR-215-5p, miR-204-5p, miR-191-5p, miR-410-5p, miR-1-5p, miR-100-3p, miR-125b-5p, miR-3969, miR-135a-5p, miR-500b-5p, miR-93, miR-6128, miR-103b, miR-27b-3p, miR-145a-5p, miR-412-5p, miR-3535, miR-134-3p, miR-185-5p, miR-411-5p, miR-149-5p, miR-125a-5p, miR-296-3p, miR-377-3p, miR-296-3p, miR-135b-5p, miR-376b-5p, miR-376b-3p, miR-3065-5p, miR-670-3p, miR-34b, miR-677, miR-181b-3p, novel\_68, miR-329-5p, miR-3074-5p, miR-10a-5p, miR-6119-3p, miR-379-3p, miR-206, novel\_1, miR-203b-5p, miR-656-5p, miR-502-5p, miR-4324, miR-20a-5p, miR-576-3p, miR-34c, miR-211, miR-24-3p, miR-374c-5p, miR-449a, miR-342-3p, miR-135a-2-3p, miR-1a-1-5p, miR-495-3p, miR-142-3p, miR-941, miR-16-1-3p, miR-34a-5p, miR-191, miR-215-5p, miR-2366, miR-2904, miR-1434-5p, miR-5703, miR-217-5p, miR-383-5p, miR-23b-3p, miR-23c, miR-616-3p, miR-3600, miR-466i-5p, miR-30b-3p, miR-34b-5p, miR-2484, novel\_17, miR-125b, miR-29b-1-5p, miR-181b-1-3p, miR-125b-2-3p, miR-130a-5p, miR-329a-5p, miR-20a, miR-543-3p, miR-582-5p, novel\_99, miR-411, miR-192-5p, miR-10a, miR-377-3p, miR-582-5p, miR-2284s, miR-656-3p, miR-139-5p, miR-204-3p, miR-2331-3p, miR-216b-3p, miR-532-5p, miR-669a-3p, miR-324-3p, miR-219b-3p, miR-665, miR-29b-2-5p, miR-6525, miR-769-5p, miR-10b-5p, miR-206-3p, miR-6134, miR-433-5p, miR-3074-5p, miR-2426, miR-4791, miR-10b, miR-301b-5p, miR-1a-3p, miR-412-3p, miR-147a, miR-500-5p, miR-455-3p, miR-421, miR-548w, miR-5010-3p, miR-181b-2-3p, miR-27a-3p, miR-145b, miR-342, novel\_103, miR-29b-1-5p, miR-106b-5p, miR-1b, miR-6134, miR-8095, miR-6527, miR-193b-3p, miR-193a-5p, miR-4510, miR-3059-5p, miR-7134-3p, miR-107-5p, miR-331-3p, miR-502-5p, miR-193b-3p, novel\_69, miR-323-5p, miR-6130, miR-25, miR-323a-5p, miR-2404, miR-320b, miR-541-5p, miR-329-5p, miR-3064-5p, miR-329b, miR-107, miR-216a-3p, miR-2387, miR-140-5p, miR-432-3p, miR-3064-5p, miR-363-5p, miR-1388-3p, miR-329a-5p, miR-193a-3p, miR-543-5p, miR-103a-2-5p, miR-106b-3p, miR-107, miR-483-3p, miR-3085-3p, miR-2898, miR-378a-5p, miR-3601, novel\_17, miR-103, miR-216a-3p, miR-222-5p, miR-483-3p, miR-210-3p, miR-103a-3p, miR-2889, miR-7862, miR-128-3p, miR-142-3p, miR-493-3p, miR-23b-5p, miR-5703, miR-188-3p, miR-1290

DSEL ENSOARGO(dermatan 211, miR-106a, miR-130a-3p, miR-3600, miR-145b, miR-20b, miR-93-5p, miR-17-5p, miR-145a-5p, miR-20b-5p, miR-877-3p, miR-106a-5p, miR-20a, miR-93, miR-301b-3p, miR-20a-5p, miR-106a-5p, miR-106b-5p, miR-17-5p, miR-106a, miR-130b-3p, miR-454-3p

ZNF333 ENSOARGO(zinc fin. 329a-5p, miR-193a-3p, miR-543-5p, miR-103a-2-5p, miR-106b-3p, miR-107, miR-483-3p, miR-3085-3p, miR-2898, miR-378a-5p, miR-3601, novel\_17, miR-103, miR-216a-3p, miR-222-5p, miR-483-3p, miR-210-3p, miR-103a-3p, miR-2889, miR-7862, miR-128-3p, miR-142-3p, miR-493-3p, miR-23b-5p, miR-5703, miR-188-3p, miR-1290

ZFYVE9 ENSOARGO(zinc fin. 329a-5p, miR-193a-3p, miR-543-5p, miR-103a-2-5p, miR-106b-3p, miR-107, miR-483-3p, miR-3085-3p, miR-2898, miR-378a-5p, miR-3601, novel\_17, miR-103, miR-216a-3p, miR-222-5p, miR-483-3p, miR-210-3p, miR-103a-3p, miR-2889, miR-7862, miR-128-3p, miR-142-3p, miR-493-3p, miR-23b-5p, miR-5703, miR-188-3p, miR-1290

miR-306b-5p, miR-1306, miR-378f, miR-146b-5p, miR-412-3p, novel\_68, miR-669, miR-576-3p, miR-28c, miR-4324, miR-625-3p, miR-193b-3p, miR-197-3p, miR-27b-3p, miR-497-5p, miR-16-1-3p, miR-16b, miR-3955-5p, miR-3431, miR-134-3p, novel\_51, miR-146a, miR-377-3p, miR-296-3p, miR-193a-3p, miR-6240, miR-2285r, miR-424-3p, miR-329a, miR-1271, miR-125a, miR-2355-5p, miR-574-5p, miR-125b-5p, miR-2284k, novel\_63, miR-134-5p, miR-16-5p, miR-2284v, novel\_42, miR-1260b, miR-23b-5p, miR-330-5p, miR-155-5p, miR-431, miR-1224-5p, miR-6517, miR-2285ad, miR-134-5p, miR-505-5p, miR-9-5p, miR-322-5p, miR-205-5p, novel\_96, miR-3064-5p, miR-2284y, miR-148b-5p, miR-378j, miR-221, miR-140-5p, miR-1983, miR-544-5p, miR-668-5p, miR-299b-5p, miR-99b-5p, miR-211-5p, miR-2319b, miR-378g, miR-499a-3p, miR-2440, miR-218-5p, miR-9-5p, miR-2284j, miR-2447, miR-423-5p, miR-877-3p, miR-329-3p, miR-362-3p, miR-1388-5p, miR-199b-3p, miR-1343-3p, miR-330-3p, miR-182-5p, miR-16b, miR-505, miR-431-5p, miR-103a-2-5p, miR-214-3p, miR-146b, miR-491-5p, miR-2284b, miR-124a, miR-1388-3p, miR-378d, miR-655, miR-129b-3p, miR-1827, miR-30c-1-3p, miR-15b-5p, miR-377-3p, miR-499b-3p, miR-10a, miR-665, miR-30a-3p, miR-151-3p, miR-30e-3p, miR-2285j, miR-4492, miR-874-5p, novel\_74, miR-214, miR-3184-5p, miR-224-5p, miR-6525, miR-1434-5p, miR-378a-3p, miR-193b-5p, miR-378i, miR-34a-5p, miR-16-1-3p, miR-664-5p, miR-33b-3p, miR-493-3p, miR-212-5p, miR-30d-3p, miR-328-3p, miR-1247-5p, miR-422a, miR-324-3p, miR-210-5p, miR-345-3p, miR-369-3p, miR-143-3p, miR-2387, miR-2285ab, miR-6395, miR-195a-5p, miR-450b-3p, miR-1291, miR-7-1-3p, miR-10a-5p, miR-34b, miR-670-3p, miR-34c, miR-16a, miR-502-5p, miR-15a, miR-199c, miR-203b-5p, miR-2428, miR-326-3p, miR-449a, miR-371b-3p, miR-211, miR-1434-3p, miR-1285, miR-786? miR-1260b miR-2284ab miR-133b-5p miR-185-5p miR-

miR-1b-5p, miR-106a-5p, miR-199b-5p, miR-130b-3p, miR-106b-5p, miR-2957, miR-421, miR-9788-3p, miR-148b-5p, miR-1298-3p, miR-142-5p, miR-222-5p, miR-412-3p, miR-541, miR-877-3p, miR-452-5p, miR-885-5p, miR-212-3p, miR-541-3p, miR-144-5p, miR-3082-5p, miR-378g, miR-499b-5p, miR-2284g, novel\_94, miR-136-5p, miR-299b-5p, miR-96-5p, miR-381-3p, miR-199b-5p, miR-130a-5p, miR-20a, miR-21-3p, miR-221-5p, miR-106a, miR-185-3p, miR-196a-3p, miR-212-5p, miR-106a, miR-2284u, miR-148a-5p, miR-19b-3p, miR-217-5p, miR-140-3p, miR-188-3p, miR-376a-5p, miR-338-3p, miR-142a-5p, miR-1271, miR-4492, miR-208b-5p, miR-454-3p, miR-155-5p, miR-664a, miR-6516-3p, miR-155-5p, miR-193b-3p, miR-301a-3p, miR-3065-3p, miR-21-3p, miR-221-5p, miR-27b-5p, miR-21a-3p, miR-668-3p, miR-193a-3p, miR-17-5p, miR-106a-5p, miR-20b, miR-134-3p, miR-130a-3p, miR-665, miR-29b, miR-21-5p, miR-197-3p, miR-2113, miR-301b-3p, miR-199b-5p, miR-29c-3p, miR-193b-3p, miR-502b, miR-6123, miR-29a, miR-33a-3p, miR-20a-5p, miR-29a-3p, miR-320b, miR-2319a, miR-9851-3p, miR-19a-3p, miR-1291, miR-21c, miR-3591-3p, miR-2387, miR-2284a, miR-3956-5p, miR-2284y, miR-199a-5p, miR-3065-3p, miR-2478, miR-181a-2-3p, miR-495-5p, miR-127-5p, miR-6536, miR-217, miR-205-5p, miR-2285af, miR-1271-5p, miR-505-5p, miR-412, miR-155-5p, miR-300, miR-29d-3p, miR-145-3p, miR-1197-3p, miR-93, miR-144-5p, miR-1306-5p, miR-767-5p, miR-29b-3p, miR-199a-5p, miR-2355-5p, miR-1248, miR-7144-5p, miR-20b-5p, miR-767, miR-17-5p, miR-93-5p, miR-200a-5p, miR-488-3p, miR-381-3p, miR-16a, novel\_82, miR-15a, miR-20a-5p, miR-208a-3p, miR-6529b, miR-656-5p, miR-2284q, miR-3957-3p, miR-3970, miR-18a-3p, miR-129b-5p, miR-140-5p, miR-2387, miR-9851-3p, miR-195a-5p, novel\_94, miR-96-5p, miR-2285k, miR-329-5p, miR-144-3p, miR-16b, miR-106b-5p, miR-106a-5p, miR-17-5p, miR-224-5p, miR-106a-5p, miR-424-5p, miR-484, miR-497-5p, miR-16b, miR-1388-5p, miR-450b-5p, miR-339-5p, miR-31-5p, novel\_78, miR-20b, miR-3535, miR-185-5p, miR-3431, miR-26c, miR-144, miR-29b-2-5p, miR-665, miR-129-5p, miR-424-5p, miR-1271, miR-16-5p, miR-539-5p, miR-28a-3p, miR-145a-3p, miR-93, miR-224-5p, miR-93-5p, miR-17-5p, miR-20b-5p, miR-339b, miR-216b-3p, miR-370-3p, miR-1271, miR-140-5p, miR-874-3p, miR-15b-5p, miR-6516, miR-339a, miR-2285af, miR-200c, miR-125a-3p, miR-208b-3p, miR-21-3p, novel\_127, miR-28-3p, miR-106a, miR-200c-3p, miR-29b-2-5p, miR-20a, miR-181a-2-3p, miR-4286, miR-329a-5p, miR-2432, miR-2285i, miR-218-2-3p, miR-188-3p, miR-3591-5p, miR-200b-3p, novel\_79, miR-18a-3p, miR-106a, miR-429-3p, miR-532-3p, miR-322-5p, miR-15a-5p, miR-200b, miR-1271-5p, miR-6516-5p, miR-758-5p

HBP1

ENSOARGO(CHMG-box)

PHF10

ENSOARGO(PHD fing)

miR-54b-5p, miR-378h, miR-2411-5p, miR-200b-3p, miR-496, miR-300, miR-30a-5p, miR-134, miR-1957a, miR-199a-5p, miR-1271-3p, miR-380-5p, miR-30a-3p, miR-181a-2-3p, miR-2403, miR-17-3p, miR-2898, miR-200c-3p, miR-30c-2-3p, miR-339a, miR-217, miR-200c, miR-199a-5p, miR-154b-5p, miR-374c-3p, miR-365a-3p, miR-615-5p, miR-7144-5p, miR-671-5p, miR-485-5p, miR-10b-3p, miR-362-5p, miR-3154, miR-381-3p, miR-503-3p, miR-2448-3p, miR-378c, miR-500b-5p, miR-3607-3p, miR-133a-3p, miR-103b, miR-486b-3p, miR-331-3p, miR-3969, miR-551b-3p, miR-432-5p, miR-185-5p, miR-122-3p, miR-744-5p, miR-30b-3p, miR-219a-1-3p, miR-1285, miR-345-5p, miR-125a-5p, miR-2285l, miR-197-5p, miR-330-3p, miR-224-5p, miR-146b-3p, miR-2404, miR-378b, miR-1291, miR-18a-3p, miR-2387, miR-326-3p, miR-2428, miR-3957-3p, novel\_101, miR-17-3p, miR-656-5p, miR-147-5p, miR-199c, novel\_1, miR-382-5p, novel\_83, miR-151-5p, miR-200b, miR-1b-3p, miR-548e-3p, miR-378d, miR-2904, miR-1197-5p, miR-188-3p, miR-5703, miR-140-3p, novel\_133, miR-1246, miR-2408, miR-2432, miR-2411, miR-221-5p, miR-21-3p, miR-760-3p, miR-125b, miR-204-3p, miR-22-3p, miR-877-5p, miR-6130, miR-140-5p, miR-221-5p, miR-378a-3p, miR-32-3p, miR-496-3p, miR-133b-3p, miR-21a-3p, miR-6134, miR-3074-2-3p, miR-2330-3p, miR-378c, miR-539-5p, miR-4510, miR-450b-3p, miR-17-3p, miR-664a, miR-324-3p, miR-500-5p, miR-222-5p, miR-409b, novel\_4, miR-151a-3p, miR-378c, miR-450b-5p, miR-7857, miR-30b-3p, miR-484, miR-378b, miR-143-5p, miR-3187-3p, miR-30c-1-3p, miR-494-3p, miR-2330-5p, miR-3085-3p, miR-326, miR-1306-5p, miR-378e, miR-3082-5p, miR-541-5p, miR-499b-5p, miR-3064-5p, miR-452-3p, miR-20a-3p, miR-877-3p, miR-361-3p, miR-199b-5p, miR-362-5p, miR-32-3p, miR-2285t, miR-1973, miR-2285n, miR-134-5p, miR-450a-1-3p, novel\_121, miR-9-5p, miR-505-5p, miR-1224-5p, novel\_79, miR-421, miR-6517, miR-452-3p, miR-10b, miR-363, miR-10a-5p, miR-7977, miR-211-5p, miR-1185-2-3p, miR-18a-3p, miR-136-5p, miR-504, miR-342-3p, miR-190b-5p, miR-495-3p, miR-9-5p, miR-2284j, miR-211, miR-20a-5p, novel\_82, miR-548w, miR-105-1, miR-31-5p, miR-145b, miR-3431, miR-1185-3p, miR-455-3p, miR-10b, miR-1285, miR-873a-5p, miR-329-3p, miR-145a-5p, miR-30b-3p, miR-362-3p, miR-30b-3p, miR-2284x, miR-188-5p, miR-106a-5p, let-7f-2-3p, let-7f-2-3p, miR-101-5p, miR-8485, miR-342, miR-106a-5p, miR-17-5p, miR-105-5p, miR-190a, miR-362-3p, miR-874-3p, miR-504-5p, miR-365a-3p, miR-10a, miR-324-5p, miR-93-5p, miR-329a, miR-10b-3p, miR-20b-5p, novel\_48, miR-2330-3p, miR-93, miR-10b-5p, miR-2284k, miR-665, miR-30a-3p, miR-592, miR-204-5p, miR-190a-5p, miR-18a-3p, miR-3600, miR-9-5p, miR-362-3p, novel\_133, miR-10a-5p, miR-664-5p, miR-105-2, miR-30a-3p, miR-376a-5p, miR-148b-5p, miR-2424, miR-2284m, novel\_127

PRODH2 ENSOARGO(proline)

MMP10 ENSOARGO(matrix m)

miR-532-5p, miR-496-3p, miR-221-5p, miR-545-3p, miR-22-3p, miR-193b-3p, miR-6130, miR-27a-5p, miR-192-5p, novel\_99, miR-2312, miR-3074-2-3p, miR-4510, miR-539-5p, miR-6134, let-7b-5p, miR-338-5p, miR-29b-2-5p, miR-222-3p, miR-208b-5p, miR-708-5p, miR-424-5p, miR-1843b-3p, miR-6516-3p, miR-17-3p, miR-548e-3p, miR-200b, miR-148b-3p, miR-15a-5p, miR-5703, miR-1197-5p, miR-188-3p, miR-2904, miR-124-3p, miR-2300b-3p, miR-215-5p, miR-1246, novel\_133, let-7a-3p, miR-378d, miR-19b-3p, miR-5100, miR-183-5p, miR-2432, miR-125b-2-3p, miR-29b-1-5p, miR-185-3p, miR-299-3p, miR-21-3p, miR-221-5p, miR-466i-5p, miR-664b, let-7d-5p, miR-3082-5p, miR-7857-3p, miR-129b-5p, miR-199b-5p, novel\_94, miR-877-3p, miR-2285f, miR-541-3p, miR-3059-5p, miR-154a, miR-371a-5p, miR-335, miR-222-5p, miR-221-3p, miR-125b-2-3p, miR-412-3p, miR-6529a, miR-484, miR-2426, miR-299a-5p, miR-33a-5p, miR-424-5p, let-7a-5p, miR-4532, miR-3187-3p, miR-30c-1-3p, miR-1306-5p, miR-326, miR-342, let-7e, miR-3955-3p, novel\_124, miR-215-5p, miR-3957-5p, miR-3957, miR-199a-5p, miR-3965, miR-365a-3p, miR-374c-3p, miR-2448-3p, miR-671-5p, miR-7144-5p, miR-3607-3p, miR-331-3p, miR-2332, miR-29b-3p, miR-410-5p, miR-204-5p, miR-28-5p, miR-767-5p, miR-222, miR-545-5p, miR-29d-3p, miR-218-2-3p, miR-345-3p, miR-615-3p, miR-496, miR-200b-3p, let-7d, miR-4286, miR-2385-3p, miR-30a-3p, miR-29b-2-5p, miR-490-3p, miR-199a-5p, miR-380-5p, miR-28b, miR-181c-3p, let-7c-5p, miR-30c-2-3p, miR-200c, miR-543-5p, miR-200c-3p, miR-191-3p, miR-2898, miR-17-3p, miR-7-1-3p, miR-29a-3p, miR-2404, miR-378b, miR-18a-3p, miR-2285ab, miR-195a-5p, miR-9851-3p, miR-19a-3p, miR-17-3p, miR-2285x, miR-3957-3p, miR-136-3p, miR-342-3p, miR-2428, miR-326-3p, miR-323c, miR-371b-3p, miR-211, let-7i, miR-16a, miR-15a, miR-203b-5p, novel\_1, miR-665, miR-2355-3p, let-7a-

GLT6D1 ENSOARGO(glycosyl

miR-219a-2-3p, miR-770b, miR-154a, miR-128b-5p, novel\_111, miR-2284j, miR-3059-5p, miR-2447, miR-2284q, miR-2285t, miR-107-5p, miR-769-5p, miR-2285y, miR-2285n, miR-218-5p, miR-27a-3p, miR-4443, let-7d-5p, miR-378g, miR-3596, miR-2319b, miR-3064-5p, miR-96-5p, miR-381-3p, miR-199b-5p, miR-140-5p, miR-2310, miR-758-3p, miR-3187-3p, miR-33a-5p, miR-101b-3p, let-7a-5p, miR-1468, miR-542-5p, let-7e, miR-103a-2-5p, miR-146b, miR-199b-5p, miR-153-3p, miR-25-5p, miR-487b-5p, miR-491-5p, miR-3085-3p, miR-505, miR-199a-3p, miR-320b, miR-216a-3p, miR-1298-3p, miR-153, miR-145b, miR-27a-3p, miR-181b-2-3p, miR-330-3p, novel\_78, miR-409b, miR-544a, miR-30b-3p, miR-758-3p, miR-6529a, miR-296-5p, miR-6134, let-7b-5p, miR-224-5p, miR-769-5p, miR-1271, miR-145a-3p, miR-4510, miR-3184-3p, miR-3074-5p, let-7b, miR-669a-3p, miR-708-5p, miR-4492, miR-129-5p, miR-1468-5p, miR-17-3p, miR-665, miR-3604, miR-320e, miR-219b-3p, miR-324-3p, let-7f, miR-2285j, miR-877-5p, let-7i-5p, miR-204-3p, miR-6130, miR-544-3p, miR-21-3p, miR-660-5p, novel\_99, miR-543-3p, miR-487b-5p, let-7f-1-3p, miR-380-3p, miR-146a-5p, miR-2432, miR-181b-1-3p, miR-130a-5p, miR-125b-2-3p, miR-2285w, miR-216c-5p, miR-329a-5p, let-7k, miR-34b-5p, miR-760-3p, miR-98-5p, miR-2284m, miR-320d, miR-185-3p, miR-324-3p, miR-542-5p, miR-328-3p, miR-199a-3p, miR-532-3p, miR-2284h-5p, miR-200b, miR-222-5p, miR-7859, miR-548e-3p, miR-34a-5p, miR-4429, miR-493-3p, miR-5703, miR-188-3p, miR-1961, miR-199b-5p, miR-449a, miR-323c, miR-3959-3p, miR-17-3p, miR-542-5p, miR-6119-3p, let-7i, miR-34c, miR-576-3p, miR-4324, miR-181b-3p, miR-320c, miR-144-3p, miR-677, miR-411b-3p, miR-34b, miR-320b, miR-3074-5p, miR-329-5p, miR-135b-5p, miR-6395, miR-6516-3p, let-7e-5p, miR-376a-2-5p, miR-146b-5p, miR-150b-3p, miR-216a-3p, miR-3591-3p, miR-363-5p, miR-1247-5p, miR-378g, miR-134-3p, novel\_51, novel\_17, miR-2300b-3p, miR-5126, miR-2898, miR-184-3p

miR-140-5p, miR-378j, miR-96-5p, miR-544-5p, miR-9-3p, miR-335-3p, miR-493-5p, miR-2319b, miR-126b-5p, miR-211-5p, miR-1185-2-3p, miR-2440, miR-3956-3p, miR-2447, miR-2284j, novel\_111, miR-877-3p, miR-541, miR-758-3p, miR-1839-5p, miR-548w, novel\_78, miR-199b-3p, miR-181b-2-3p, miR-142-5p, miR-126a-5p, miR-148b-5p, miR-455-3p, miR-199a-3p, miR-16b, miR-199b-5p, miR-146b, miR-744-3p, miR-23a-3p, miR-1b-5p, miR-299, miR-30d-5p, miR-598-3p, miR-339b, miR-345-5p, miR-377-3p, miR-15b-5p, let-7b-3p, miR-15b-3p, miR-665, miR-451a, miR-130b-5p, miR-129-5p, miR-3074-5p, miR-3184-3p, miR-98-3p, miR-142a-5p, miR-181c-5p, miR-30c-5p, miR-1434-5p, miR-98-3p, miR-493-3p, miR-148a-5p, miR-23c, miR-618, novel\_17, miR-30b, miR-500a-5p, miR-181b-1-3p, miR-148a-3p, miR-3591-3p, miR-2319a, miR-146b-5p, miR-3074-5p, miR-3120-3p, miR-181b-3p, miR-677, miR-144-3p, miR-576-3p, miR-28c, miR-1a-1-5p, miR-1839-3p, miR-2284w, miR-199b-5p, miR-708-3p, miR-16b, miR-369-5p, miR-497-5p, miR-103a-3p, miR-339-5p, miR-146a, miR-377-3p, novel\_51, miR-105-5p, miR-196b-5p, miR-493-5p, miR-628-5p, let-7f-2-3p, let-7f-2-3p, miR-432-3p, miR-2284l, miR-2285r, miR-432-3p, miR-301, miR-30e-5p, miR-137-3p, miR-200a-5p, miR-345-5p, miR-767, miR-2355-5p, miR-2285aa, miR-300-3p, miR-331-5p, miR-223-5p, miR-2284k, miR-100-3p, miR-134-5p, miR-2284v, miR-16-5p, miR-196a-5p, miR-30c, miR-429-3p, miR-1224-5p, miR-412, novel\_79, miR-322-5p, miR-486-5p, novel\_121, miR-134-5p, miR-664-3p, miR-205-5p, miR-127-5p, miR-1a-2-5p, miR-152-3p, miR-200a-3p, miR-450b-5p, miR-200a, miR-29a-5p, miR-199b-5p, miR-129b-5p, miR-664b, miR-7977, miR-541-5p, miR-499b-5p, miR-3082-5p, miR-489, miR-7857-3p, miR-30b-5p, miR-382-3p, miR-371a-5p, miR-212-3p, miR-541-3p, novel\_60, miR-3059-5p, miR-452-5p, miR-8005, miR-143-5p, miR-412-3p, miR-450b-5p, miR-541a, miR-105-5p, miR-664b-3p, miR-378d, miR-199a-5p, miR-6119-5p, miR-2285p, miR-455-5p, miR-422a, miR-2898, miR-200a-3p, miR-30b-3p, miR-199b-5p, miR-151a-3p, miR-199b-3p, miR-1343-3p, miR-378h, miR-6516-5p, novel\_121, miR-545-5p, miR-411-5p, miR-541, miR-378i, miR-378b, miR-378a-3p, miR-5703, miR-7857, miR-2904, miR-450b-5p, miR-378c, miR-455-5p, miR-16-2-3p, miR-145a-3p, miR-541-3p, miR-378c, miR-2285x, miR-452-5p, miR-3957-3p, miR-199b-5p, miR-378c, miR-151-3p, miR-3968, novel\_74, miR-147-5p, miR-199c, miR-208b-5p, miR-216b-3p, miR-545-3p, miR-378a-3p, miR-7-1-3p, miR-141-3p, miR-216b-3p, miR-3082-5p, miR-378e, miR-6516, miR-199a-5p, miR-199b-5p, miR-3065-5p, miR-378f



miR-142-3p, miR-1298-3p, miR-221-3p, miR-199b-3p, miR-548w, miR-105-1, miR-222-5p, miR-181b-2-3p, miR-544a, miR-362-3p, miR-101c, miR-143-5p, miR-484, miR-329-3p, miR-30c-1-3p, miR-8485, miR-101b-3p, miR-124a, miR-3955-3p, miR-130b-3p, miR-491-5p, miR-1185-5p, miR-542-5p, miR-199b-5p, miR-326, novel\_103, miR-320b, miR-199a-3p, miR-362-3p, miR-499a-3p, miR-378g, miR-203-3p, miR-20a-3p, miR-2319b, miR-139-5p, miR-668-5p, miR-96-5p, miR-9-3p, miR-1983, miR-221, miR-199b-5p, miR-378j, novel\_111, miR-877-3p, miR-361-3p, miR-7705, miR-154a, miR-1285-5p, miR-2447, miR-9-5p, miR-2285f, miR-3968, miR-2285t, miR-218-5p, miR-222-5p, miR-148b-3p, miR-7859, miR-328-3p, miR-616-3p, miR-199a-3p, miR-4429, miR-33b-3p, miR-34a-5p, miR-361-5p, miR-362-3p, novel\_133, miR-1197-5p, miR-124-3p, miR-181b-1-3p, miR-142a-3p, miR-377-5p, miR-130a-5p, miR-329a-5p, miR-760-3p, miR-202-5p, miR-320d, miR-34b-5p, miR-30b-3p, miR-542-5p, miR-345-3p, miR-216b-5p, miR-139-5p, miR-6130, miR-499b-3p, miR-544-3p, miR-301a-3p, miR-204-3p, miR-545-3p, miR-140-5p, miR-30c-1-3p, miR-552-3p, miR-532-5p, miR-582-5p, miR-543-3p, miR-433-3p, miR-27b-5p, miR-6525, miR-6134, miR-181c-5p, miR-4510, miR-129-2-3p, miR-664a, miR-6516-3p, miR-17-3p, miR-454-3p, miR-222-3p, miR-2285j, miR-320e, miR-19b-1-5p, miR-134-3p, miR-544b, miR-149-5p, novel\_116, miR-133b-5p, miR-31-5p, miR-377-5p, miR-130a-3p, miR-665, miR-21-5p, miR-29b, miR-2284x, miR-181a-5p, miR-19b-2-5p, novel\_23, miR-432-3p, miR-432-3p, miR-2285r, miR-296-3p, miR-363-5p, miR-483-3p, miR-296-3p, novel\_51, miR-2411-3p, miR-365b-5p, miR-105-5p, miR-34b, miR-670-3p, miR-29a-3p, miR-181b-3p, miR-677, miR-320c, miR-378b, miR-329-5p, miR-655-5p, miR-412-3p, miR-6395, miR-135b-5p, miR-148a-3p, miR-2287, miR-2285ab, miR-3065-5p, miR-21c, miR-371b-3p, miR-3050-

miR-23b-3p, miR-15a-5p, miR-148b-3p, miR-328-3p, miR-18a-3p, miR-3600, miR-30d-3p, miR-493-3p, miR-142-3p, miR-16-1-3p, miR-2300b-3p, miR-362-3p, miR-376a-5p, miR-1197-5p, miR-140-3p, miR-376a-5p, miR-421-5p, miR-181b-1-3p, miR-143-3p, miR-216c-5p, miR-329a-5p, miR-487a, miR-466i-5p, novel\_17, miR-500a-5p, miR-216a-5p, miR-125b, miR-345-3p, miR-301a-3p, miR-204-3p, miR-877-5p, miR-15b-5p, miR-545-3p, miR-3065-3p, miR-21-3p, miR-1827, miR-186-5p, miR-2285c, miR-433-3p, miR-655, miR-224-5p, miR-206-3p, miR-3184-5p, miR-181c-5p, miR-539-5p, miR-145a-3p, miR-3074-5p, miR-3184-3p, miR-3958-5p, miR-665-5p, miR-3074-2-3p, miR-2330-3p, miR-664a, miR-6516-3p, miR-454-3p, miR-708-5p, miR-424-5p, miR-222-3p, miR-30e-3p, miR-30a-3p, miR-19b-1-5p, miR-29b-2-5p, miR-655-3p, miR-500-5p, miR-9788-3p, miR-1185-3p, miR-2285e, miR-1343-3p, novel\_78, miR-5010-3p, miR-181b-2-3p, miR-145b, miR-362-3p, miR-2426, miR-450b-5p, miR-3120-5p, miR-329-3p, miR-7857, miR-1a-3p, miR-125b-2-3p, miR-193a, miR-1388-3p, miR-424-5p, miR-23a-3p, miR-33a-5p, miR-130b-3p, miR-103a-2-5p, miR-326, miR-362-3p, miR-16b, miR-489, miR-3082-5p, miR-1185-2-3p, miR-10b, miR-335-3p, miR-877-3p, miR-1983, miR-362-5p, miR-1285-5p, miR-423-5p, novel\_60, miR-2447, miR-3956-3p, miR-6527, miR-181d-5p, miR-9-5p, miR-628-3p, miR-374a-3p, miR-218-5p, miR-107-5p, miR-322-5p, miR-9-5p, miR-134-5p, miR-486-5p, miR-222, miR-6517, miR-429-3p, miR-7641, miR-300, miR-128-3p, miR-345-3p, miR-3578, miR-134, miR-29d-3p, miR-330-5p, miR-450b-5p, miR-148b-5p, miR-3065-3p, miR-200a, miR-1957a, miR-3956-5p, miR-3529-3p, miR-1, miR-30a-3p, miR-29b-2-5p, miR-2898, miR-200c-3p, miR-1a-2-5p, miR-181b-5p, novel\_127, miR-152-3p, miR-200a-3p, miR-1260a, miR-6119-5p, miR-200c, miR-3959-5p, miR-487a-3p, miR-370-3p, miR-141-3p, miR-125a, miR-767, miR-329a, miR-2318, miR-23a-5p, miR-

miR-877-5p, novel\_32, miR-204-3p, miR-306b-3p, miR-370-5p, miR-660-5p, miR-221-5p, miR-545-3p, miR-582-5p, miR-18a-5p, miR-338-3p, miR-6134, let-7b-5p, miR-29c-5p, miR-145a-3p, miR-664a, miR-29d-5p, miR-19b-3p, miR-1197-5p, miR-2904, miR-124-3p, novel\_133, miR-146a-5p, miR-29b-1-5p, miR-21-3p, miR-34b-5p, miR-30d, miR-221-5p, miR-2284m, miR-216a-5p, miR-27a-3p, let-7d-5p, miR-3082-5p, miR-7857-3p, miR-7977, miR-3064-5p, novel\_94, miR-361-3p, miR-452-5p, miR-541-3p, miR-3059-5p, novel\_60, miR-4726-5p, miR-371a-5p, miR-216a-3p, miR-27a-3p, novel\_4, miR-30b-3p, miR-7857, miR-296-5p, miR-484, miR-491-3p, miR-30c-1-3p, miR-382-3p, let-7a-5p, let-7e, miR-3085-3p, novel\_115, miR-1306-5p, miR-342, miR-2284n, miR-365a-3p, miR-374c-3p, miR-34c-5p, miR-141-3p, miR-370-3p, miR-485-5p, miR-7144-5p, miR-23a-5p, novel\_48, miR-18a, miR-3154, miR-2448-3p, miR-488-3p, miR-365a-5p, miR-374a-3p, miR-323-3p, miR-6128, miR-3607-3p, miR-204-5p, miR-374b-3p, miR-331-3p, miR-370-5p, miR-29b-3p, miR-545-5p, let-7d, miR-30a-5p, miR-29d-3p, miR-3065-3p, miR-380-5p, miR-28b, miR-181a-2-3p, miR-30a-3p, miR-543-5p, miR-191-3p, miR-450a-2-3p, miR-2898, miR-339a, let-7c-5p, miR-30c-2-3p, miR-1260a, miR-29a-3p, miR-34b, miR-146b-3p, miR-320b, miR-363, miR-505-3p, miR-7975, miR-19a-3p, miR-18a-3p, miR-18b, miR-2428, miR-449a, miR-3959-3p, miR-24-3p, miR-211, miR-1193, miR-2285x, miR-342-3p, miR-656-5p, let-7i, miR-34c, miR-502-5p, miR-2355-3p, miR-185-5p, let-7g-5p, miR-432-5p, miR-187-3p, miR-219a-1-3p, miR-1260b, miR-29b, miR-30b-3p, miR-380-3p, miR-2284ab, miR-345-5p, miR-654-3p, miR-363-5p, miR-466f-3p, miR-660, let-7i-5p, miR-216b-5p, miR-582-5p, miR-30c-1-3p, miR-625-5p, miR-345-5p, miR-339b, miR-487b-5p, miR-30d-5p, miR-500a-3p, miR-665-5p, miR-214, miR-3184-3p, miR-3074-5p, miR-500-3p, let-7b, miR-500, miR-664a-5p, miR-665, miR-30a-3p, miR-206-3p, miR-424-5p, miR-16-5p, miR-1, miR-206, miR-21-3p, miR-424-5p, miR-107, miR-135a-1-3p, miR-15a, miR-16b, miR-16a, miR-15a-5p, miR-487a-3p, miR-322-5p, miR-15b-5p, miR-103, miR-652-3p, miR-103a-3p, miR-504-5p, miR-485-3p, miR-370-3p, miR-107, miR-504, miR-16b, miR-195a-5p, miR-497-5p, miR-1a-3p, miR-216b-3p, miR-139-5p, miR-552-3p, miR-139-5p, miR-142-3p, miR-142a-3p, miR-377-3p, miR-361-3p, miR-669, miR-2366, miR-377-3p, miR-6529b, miR-216a-3p, miR-128-3p

PSMB1 ENSOARGO(proteasome) 3p, miR-2285y, miR-140-3p, miR-2285ad

TBX20 ENSOARGO(T-box 20) miR-9-5p, miR-144-5p, miR-376c-3p, miR-2284l, miR-877-3p, miR-30c-1-3p, miR-1b-5p, miR-2285p, miR-320b, miR-2285af, miR-30c-2-3p, miR-320d, miR-592, miR-548w, miR-30c-1-3p, miR-185-5p, miR-376e-3p, miR-9-5p, miR-376c-3p, miR-320c, novel\_32, miR-144-5p, miR-320a, miR-188-3p, miR-137-3p, miR-27b-5p, miR-4429, miR-1388-5p, miR-2284x, miR-505-3p

FBXW8 ENSOARGO(F-box an) 3p, miR-142a-3p, miR-377-3p, miR-361-3p, miR-669, miR-2366, miR-377-3p, miR-6529b, miR-216a-3p, miR-128-3p

SLK ENSOARGO(STE20-li) miR-2285y, miR-140-3p, miR-2285ad

HLTF ENSOARGO(helicase) miR-9-5p, miR-144-5p, miR-376c-3p, miR-2284l, miR-877-3p, miR-30c-1-3p, miR-1b-5p, miR-2285p, miR-320b, miR-2285af, miR-30c-2-3p, miR-320d, miR-592, miR-548w, miR-30c-1-3p, miR-185-5p, miR-376e-3p, miR-9-5p, miR-376c-3p, miR-320c, novel\_32, miR-144-5p, miR-320a, miR-188-3p, miR-137-3p, miR-27b-5p, miR-4429, miR-1388-5p, miR-2284x, miR-505-3p

miR-410-5p, miR-450b-3p, miR-1306, miR-146b-3p, miR-670-3p, miR-299b-3p, miR-6535, miR-329-5p, miR-128-1-5p, miR-656-5p, miR-142b, miR-28c, miR-133a-5p, miR-323c, miR-342-3p, miR-335-5p, miR-1193, miR-30b-3p, miR-125b-1-3p, miR-1260b, miR-7862, miR-374b-3p, novel\_116, miR-31-5p, miR-665, miR-339-5p, miR-26b-3p, miR-1343-5p, novel\_51, miR-345-5p, miR-130b-5p, miR-345-5p, miR-1814c, miR-365a-3p, miR-324-5p, miR-154b-5p, miR-2355-5p, miR-141-3p, miR-486b-3p, miR-134-5p, miR-370-5p, miR-331-3p, miR-1260b, miR-582-3p, miR-200b-3p, miR-1290, miR-134, miR-1343-5p, miR-505-5p, miR-134-5p, miR-129-1-3p, miR-299a-3p, miR-429-3p, miR-1224-5p, novel\_79, miR-2898, miR-200c-3p, miR-200a-3p, miR-543-5p, miR-1260a, miR-125a-3p, miR-200c, miR-339a, miR-450b-5p, miR-28b, miR-148b-5p, miR-490-3p, miR-29b-2-5p, miR-495-5p, miR-4286, miR-2403, miR-877-3p, miR-361-3p, miR-409-5p, miR-2483-3p, miR-454-5p, miR-4792, miR-452-3p, miR-2319b, miR-20a-3p, miR-499a-5p, miR-335, miR-2284q, miR-877-3p, miR-361-3p, novel\_60, miR-2447, miR-3956-3p, miR-1296-5p, miR-1388-5p, miR-2284r, miR-296-5p, miR-6529a, miR-484, miR-30b-3p, miR-425-3p, miR-148b-5p, miR-2459, miR-1343-3p, novel\_78, miR-222-5p, miR-3955-3p, miR-2285o, miR-214-3p, miR-342, miR-1306-5p, miR-2957, miR-505, miR-2310, miR-345-5p, miR-339b, miR-1827, miR-129b-3p, miR-204-3p, novel\_32, miR-140-5p, miR-370-5p, miR-6516-3p, miR-4492, miR-130b-5p, miR-15b-3p, miR-2285j, miR-29b-2-5p, miR-665, miR-6134, miR-129-2-3p, miR-3958-5p, miR-214, novel\_73, miR-148a-5p, novel\_133, miR-2300b-3p, miR-2904, miR-222-5p, miR-200b, miR-1247-5p, miR-2284h-5p, miR-212-5p, miR-760-3p, miR-299-3p, miR-21-3p, novel\_17, miR-324-3p, miR-185-3p, miR-486-3p, miR-329a-5p, miR-2285w, miR-133a-3p, miR-148a-5p, miR-300, miR-1197-5p, novel\_121, miR-487a-3p, miR-485-3p, miR-18a-3p, miR-21-3p, novel\_96, novel\_127, miR-2284m, miR-1260a, miR-210-5p, miR-200a, miR-3065-3p, miR-216c-5p, miR-625-5p, miR-598-3p, miR-433-3p, miR-21a-3p, miR-381-3p, miR-223-5p, miR-27a-5p, miR-377-3p, miR-21-3p, miR-598-3p, miR-3065-3p, miR-1271, miR-487a-5p, miR-204-5p, miR-331-3p, miR-3604, miR-2284k, miR-365a-5p, miR-181c-3p, miR-6525, miR-1260b, miR-214, miR-539-5p, miR-2284ab, miR-219a-1-3p, miR-1260b, miR-432, miR-2113, miR-148b-5p, miR-432-5p, miR-2284d, novel\_78, miR-452-5p, miR-466f-3p, miR-103a-2-5p, miR-214-3p, miR-491-5p, miR-365b-5p, miR-342, miR-377-3p, miR-8485, miR-193a, miR-491-3p, miR-668-3p, miR-376b, miR-494-3p, miR-493-5p, miR-335-3p, miR-493-5p, miR-181a-3p, miR-3970, miR-18a-3p, miR-3591-3p, miR-669, miR-7857-3p, miR-2285u, miR-211-5p, miR-22-5p, miR-147-5p, miR-485-3p, miR-107-5p, miR-2285n, miR-211, miR-2284j, miR-452-5p, miR-219a-5p, miR-342-3p, miR-3059-5p

miR-223-5p, miR-376c-3p, miR-3957, miR-34c-5p, miR-331-5p, miR-769, miR-2285aa, miR-615-5p, miR-125a, miR-3957-5p, miR-3074-1-3p, miR-1248, miR-345-5p, miR-2318, miR-329b, miR-23b, miR-3154, miR-320a, miR-488-3p, miR-331-5p, miR-301, miR-378c, miR-365a-5p, miR-193a-5p, miR-6128, miR-486b-3p, miR-191-5p, miR-204-5p, miR-331-5p, miR-26c, miR-331-3p, miR-125b-5p, miR-135a-1-3p, miR-582-3p, novel\_121, miR-9-5p, miR-302a-5p, miR-758-5p, miR-1271-5p, miR-378h, miR-412, miR-431, miR-376a-5p, miR-423-3p, miR-2427, miR-330-5p, miR-345-3p, novel\_39, miR-29a-5p, miR-1957a, miR-450c-5p, miR-2285b, miR-490-3p, miR-92b-3p, miR-495-5p, miR-30a-3p, miR-181a-2-3p, miR-92a-3p, miR-450a-2-3p, miR-181b-5p, miR-320c, miR-677, miR-181b-3p, miR-2404, miR-323a-5p, miR-146b-3p, miR-670-3p, miR-34b, miR-3120-3p, miR-26b-5p, miR-378b, miR-329-5p, miR-378f, miR-376a-2-5p, miR-412-3p, miR-21c, miR-326-3p, novel\_27, miR-449a, miR-2428, miR-211, miR-24-3p, miR-2285x, miR-219b-3p, miR-656-5p, miR-147-5p, miR-92a-3p, miR-34c, miR-425-5p, novel\_87, miR-133a-5p, miR-142b, miR-194-3p, miR-412-5p, miR-3431, miR-31-5p, miR-26a-2-3p, miR-30b-3p, miR-21-5p, miR-219a-1-3p, miR-194-5p, miR-19b-2-5p, miR-542-3p, miR-181a-5p, miR-1843b-5p, miR-539-3p, miR-345-5p, miR-432-3p, miR-432-3p, miR-363-5p, miR-125a-5p, miR-378a-5p, miR-365b-5p, miR-190a, miR-194a, miR-2411-3p, novel\_25, miR-499b-3p, miR-323-5p, miR-216b-5p, miR-296-3p, miR-545-3p, miR-378a-3p, let-7g-3p, miR-345-5p, miR-129b-3p, miR-411, miR-3184-5p, miR-338-3p, miR-6134, miR-769-5p, miR-1271, miR-2330-3p, miR-665-5p, miR-378c, miR-4492, miR-190a-5p, miR-664a, miR-30a-3p, miR-19b-1-5p, miR-338-5p, miR-30e-3p, miR-7859, miR-487a-3p, miR-23b-3p, miR-3600, miR-30d-3p, miR-485-3p, miR-133a-3p, miR-34a-5p, miR-361-5p, miR-33b-3p, miR-4490, miR-5703, miR-378a-3p, miR-378i, miR-191, miR-

miR-194-3p, miR-544b, miR-412-5p, miR-503-5p, miR-22-3p, miR-873a-5p, miR-1285, miR-2113, miR-542-3p, miR-744-5p, miR-138, miR-2284ab, miR-363-5p, miR-654-3p, miR-2284l, miR-503-5p, miR-1343-5p, miR-125a-5p, miR-660, miR-196b-5p, miR-483-3p, miR-329-5p, miR-669, miR-6535, miR-374c-3p, miR-411b-3p, novel\_69, miR-670-3p, miR-34b, miR-1306, miR-216a-3p, miR-18a-3p, miR-2387, miR-18b, miR-6395, miR-378f, miR-3957-3p, novel\_101, miR-1193, miR-342-3p, miR-335-5p, novel\_27, miR-449a, miR-34c, miR-502-5p, miR-6123, miR-128-1-5p, novel\_1, miR-196a-2-3p, miR-1224-5p, miR-18b-5p, miR-6517, miR-134-5p, miR-545-5p, miR-2284z, miR-505-5p, miR-483-3p, miR-2411-5p, miR-378h, miR-1343-5p, miR-615-3p, miR-196a-5p, miR-134, miR-128-3p, miR-495-5p, miR-4286, novel\_39, miR-3065-3p, miR-1271-3p, miR-490-3p, novel\_127, novel\_96, miR-200a-3p, miR-2898, miR-370-3p, miR-2285aa, miR-1271, miR-141-3p, miR-125a, miR-615-5p, miR-3956, miR-874-3p, miR-324-5p, miR-34c-5p, miR-374c-3p, miR-3154, miR-18a, miR-23a-5p, miR-485-5p, miR-329b, miR-193a-5p, miR-133a-3p, novel\_42, miR-378c, miR-181c-3p, miR-1197-3p, miR-125b-5p, miR-331-3p, miR-3969, miR-5100, miR-370-5p, miR-28-5p, miR-134-5p, miR-486b-3p, miR-138-5p, miR-2300a-5p, miR-1343-3p, miR-216a-3p, miR-496-5p, miR-142-3p, miR-147a, miR-378b, miR-2284r, miR-301b-5p, miR-2284aa, miR-1388-5p, miR-378c, miR-101a-5p, miR-544a, miR-382-3p, miR-101b-3p, miR-4532, miR-378d, miR-505, novel\_19, miR-2957, miR-342, miR-5126, miR-1306-5p, miR-491-5p, novel\_124, miR-4792, miR-4443, miR-378e, miR-361-3p, novel\_94, miR-181a-3p, miR-219a-5p, miR-423-5p, miR-1973, miR-371a-5p, miR-301a-5p, miR-218-5p, miR-615, miR-4726-5p, miR-335, miR-18a-3p, miR-1247-5p, novel\_83, miR-532-3p, miR-328-3p, miR-383-5p, miR-378a-3p, miR-1197-5p, miR-188-3p, novel\_133, miR-378i, miR-218-1-

miR-1260b, miR-1197-3p, novel\_42, let-7e-3p, miR-193a-5p, miR-331-5p, miR-6740-5p, miR-3959-5p, miR-874-3p, miR-2355-5p, miR-2285aa, miR-329a, miR-345-5p, miR-329b, miR-331-5p, novel\_39, miR-3064-5p, novel\_96, miR-152-3p, miR-205-5p, miR-505-5p, miR-9-5p, miR-486-5p, novel\_121, miR-450a-1-3p, miR-6517, miR-429-3p, miR-299a-3p, miR-2285ad, miR-1224-5p, novel\_79, miR-196a-5p, miR-23b-5p, miR-1343-5p, miR-2284w, miR-193b-3p, miR-6123, miR-28c, miR-576-3p, novel\_87, miR-299b-3p, miR-181b-3p, miR-6535, miR-669, miR-677, miR-320c, miR-3074-5p, miR-3120-3p, miR-148a-3p, miR-3065-5p, miR-216a-3p, miR-432-3p, miR-432-3p, miR-6240, miR-378a-5p, miR-196b-5p, miR-193a-3p, miR-377-3p, miR-7-5p, novel\_51, miR-2285v, miR-134-3p, miR-3431, novel\_116, miR-31-5p, miR-339-5p, miR-16-1-3p, miR-3432b, miR-542-3p, miR-7b-5p, miR-708-3p, novel\_23, miR-450c-3p, miR-6525, miR-3074-5p, miR-433-5p, miR-214, miR-130b-5p, miR-4492, miR-874-5p, miR-665, miR-377-3p, miR-2284s, miR-30c-1-3p, miR-2331-3p, miR-296-3p, miR-345-5p, miR-339b, miR-1827, miR-1895, miR-450a-1-3p, miR-2285c, miR-129b-3p, miR-377-5p, miR-376a-5p, miR-486-3p, novel\_17, miR-92a-1-5p, miR-324-3p, miR-219b-5p, miR-328-3p, miR-212-5p, miR-184-3p, miR-34a-5p, miR-16-1-3p, miR-664-5p, miR-218-1-3p, miR-877-3p, miR-361-3p, miR-3956-3p, miR-2447, miR-9-5p, miR-6527, miR-3968, miR-499a-5p, miR-378g, miR-139-5p, miR-7689-3p, miR-136-5p, miR-378j, miR-8485, miR-1388-3p, miR-491-5p, miR-214-3p, miR-103a-2-5p, miR-199a-3p, miR-147a, miR-455-3p, miR-1343-3p, novel\_78, miR-330-3p, miR-145b, miR-362-3p, miR-1388-5p, miR-2284r, miR-329-3p, miR-138-5p, miR-486b-3p, miR-28-5p, miR-3969, miR-331-3p, miR-34c-5p, miR-3957, miR-3957-5p, miR-615-5p, miR-10b-3p, miR-485-5p, miR-671-5p, miR-23a-5p, miR-3154, miR-320a, miR-28b, miR-3520-3p, miR-181a-2-

miR-143-3p, miR-29b-1-5p, miR-142a-3p, miR-369-3p, miR-20a, miR-2887, miR-105-3p, miR-1277-5p, miR-30b-3p, miR-3653-3p, miR-21-3p, miR-106a, miR-320d, miR-99a-3p, miR-122-3p, miR-125b, miR-196a-3p, miR-210-5p, novel\_17, miR-532-3p, novel\_83, miR-23b-3p, miR-23c, miR-505-3p, miR-30d-3p, miR-548e-3p, miR-106a, miR-218-1-3p, miR-33b-3p, novel\_73, miR-4429, miR-140-3p, miR-1197-5p, miR-5703, miR-1193, miR-193b-5p, miR-181c-5p, miR-1271, miR-433-5p, novel\_74, miR-6516-3p, miR-30a-3p, miR-219b-3p, miR-29b-2-5p, miR-665, miR-320e, miR-30e-3p, miR-204-3p, miR-155-5p, miR-499b-3p, miR-27a-5p, miR-139-5p, miR-216b-3p, miR-182-5p, miR-552-3p, miR-504-5p, miR-543-3p, miR-1827, let-7g-3p, miR-27b-5p, miR-433-3p, miR-3613-5p, miR-193a, miR-8485, miR-3187-3p, miR-23a-3p, miR-676-3p, miR-106a-5p, miR-382-3p, miR-25-5p, miR-29b-1-5p, miR-106b-5p, miR-182-5p, miR-320b, novel\_103, miR-9788-3p, miR-2459, miR-1185-3p, miR-425-3p, miR-496-5p, miR-539-5p, miR-142-3p, miR-1298-3p, miR-27a-3p, miR-181b-2-3p, miR-330-3p, novel\_4, miR-1343-3p, miR-548w, miR-2284aa, miR-1839-5p, miR-3120-5p, miR-2426, miR-30b-3p, miR-541, miR-219a-2-3p, miR-877-3p, miR-2285f, miR-6527, miR-219a-5p, miR-194b-5p, miR-181d-5p, miR-2447, miR-541-3p, miR-499a-5p, miR-335, miR-218-5p, miR-101-3p, miR-203-3p, miR-27a-3p, miR-1185-2-3p, miR-499a-3p, miR-139-5p, miR-452-3p, miR-877-3p, miR-9-3p, miR-96-5p, miR-504, miR-361-3p, miR-29a-5p, novel\_39, miR-3956-5p, miR-28b, miR-2478, miR-30a-3p, miR-29b-2-5p, miR-2403, miR-3529-3p, miR-450a-2-3p, miR-1a-2-5p, miR-181b-5p, miR-1260a, miR-219-3p, miR-2284z, miR-505-5p, miR-1271-5p, miR-196a-2-3p, miR-155-5p, let-7a-2-3p, miR-582-3p, miR-10b-3p, miR-93, miR-1260b, miR-6128, miR-126b-3p, miR-100-3p, miR-125b-5p, miR-3969, miR-1-5p, miR-99b-3p, miR-5100, miR-222, miR-223-5p, miR-154b-5p, miR-331-5p, miR-3965, miR-365a-



miR-130a-5p, miR-29b-1-5p, miR-376a-5p, miR-380-3p, miR-2285w, miR-329a-5p, miR-21-3p, miR-374a-5p, miR-500a-5p, miR-324-3p, miR-7859, miR-2284h-5p, miR-376a-5p, miR-188-3p, miR-206-3p, miR-142a-5p, miR-3074-2-3p, miR-6516-3p, miR-155-5p, miR-208b-5p, miR-2285j, miR-655-3p, miR-324-3p, miR-544-3p, miR-877-5p, miR-155-5p, novel\_32, miR-660-5p, miR-496-3p, miR-140-5p, miR-532-5p, miR-21-3p, miR-339b, miR-2312, let-7g-3p, novel\_99, miR-21a-3p, miR-299, miR-655, miR-1b-5p, miR-1185-5p, miR-29b-1-5p, miR-142-5p, miR-1185-3p, miR-421, miR-548w, miR-330-3p, miR-409b, miR-145b, miR-544a, miR-1388-5p, miR-16-2-3p, miR-21b, miR-6529a, miR-125b-2-3p, miR-1a-3p, novel\_111, miR-194b-5p, miR-2285f, miR-499a-5p, miR-2284q, miR-374a-3p, miR-382-3p, miR-2285n, miR-218-5p, miR-3596, miR-1185-2-3p, miR-2319b, miR-211-5p, miR-374b-5p, miR-2285u, miR-299b-5p, miR-129b-5p, miR-2478, miR-29a-5p, miR-200a, miR-1, miR-200c-3p, miR-200c, miR-339a, miR-302a-5p, miR-545-5p, miR-429-3p, miR-2285ad, novel\_79, miR-411-3p, let-7a-2-3p, miR-496, miR-155-5p, miR-218-2-3p, miR-374a-3p, miR-374b, miR-331-5p, miR-204-5p, miR-374b-3p, miR-410-3p, miR-2332, miR-135a-5p, miR-100-3p, miR-331-5p, miR-324-5p, miR-3068-3p, miR-503-3p, miR-141-3p, let-7g-3p, miR-329b, miR-331-5p, miR-424-3p, let-7a-2-3p, miR-6240, miR-660, miR-194a, novel\_51, miR-330-3p, miR-2284d, miR-544b, miR-339-5p, miR-16-1-3p, miR-380-3p, miR-188-5p, miR-2113, miR-194-5p, miR-145a-5p, miR-323c, miR-211, miR-2284w, miR-374c-5p, miR-206, miR-33a-3p, miR-329-5p, miR-1291, miR-135b-5p, miR-2285ab, miR-3591-3p, miR-4532, miR-363-5p, miR-146b, miR-214-3p, miR-199a-3p, miR-146a, miR-505, miR-29b-1-5p, novel\_19, novel\_51, miR-149-5p, miR-31-5p, miR-199b-3p, miR-548w, novel\_4, miR-1343-3p, miR-665, miR-27a-3p, miR-30b-3p, miR-744-5p, miR-27b-3p, miR-296-5p, miR-301b-5p, miR-541, miR-22-3p, miR-7857, miR-30b-3p, miR-361-3p, miR-24-3p, miR-371b-3p, miR-423-5p, miR-2428, novel\_120, miR-2447, miR-541-3p, miR-335-5p, miR-128-1-5p, miR-335, miR-490-5p, miR-199c, novel\_82, miR-301a-5p, miR-669, miR-27a-3p, miR-4443, miR-499b-5p, miR-2285u, miR-320b, miR-1291, miR-19a-3p, miR-504, miR-9851-3p, miR-146b-5p, miR-6395, miR-361-3p, miR-148a-3p, miR-29b-1-5p, novel\_39, miR-146a-5p, miR-486-3p, miR-29b-2-5p, miR-2898, miR-152-3p, miR-200a-3p, miR-205-5p, miR-185-3p, miR-24-2-5p, miR-7859, miR-148b-3p, miR-199a-3p, miR-134-5p, miR-328-3p, miR-548e-3p, miR-19b-3p, miR-134, miR-218-2-3p, miR-1193, miR-122-5p, miR-3184-5p, miR-433-5p, miR-214, miR-3074-2-3p, miR-664a, miR-4492, miR-486b-3p, miR-134-5p, miR-15b-3p, miR-2433, miR-2285j, miR-331-3p, miR-29b-2-5p, miR-204-3p, novel\_25, miR-22-3p, miR-574-5p, miR-504-5p, miR-2355-5p, miR-141-3p, miR-552-3p, miR-485-5p, miR-1827, miR-129b-3p

miR-365a-5p, miR-378c, novel\_42, miR-193a-5p, miR-6128, miR-767-5p, miR-134-5p, miR-29b-3p, miR-25-3p, miR-376c-3p, miR-542-5p, miR-370-3p, miR-1271, miR-767, miR-503-3p, miR-3154, miR-92b-3p, miR-2284y, miR-3065-3p, miR-2284a, miR-490-3p, miR-1271-3p, miR-3064-5p, miR-1, miR-127-5p, novel\_127, miR-92a-3p, miR-2285af, miR-125a-3p, miR-9-5p, miR-483-3p, miR-378h, miR-134-5p, miR-486-5p, miR-412, miR-411-3p, miR-582-3p, miR-134, miR-1343-5p, miR-29d-3p, miR-2428, miR-342-3p, miR-29c-3p, miR-92a-3p, miR-128-1-5p, miR-206, miR-379-3p, miR-29a, novel\_1, miR-22-5p, miR-576-3p, miR-6529b, miR-323a-5p, miR-29a-3p, miR-6535, novel\_68, miR-320b, miR-412-3p, miR-9851-3p, miR-378f, miR-2285ab, miR-18a-3p, miR-2285r, miR-493-5p, miR-101-5p, miR-363-5p, miR-483-3p, miR-1343-5p, miR-365b-5p, miR-32, miR-149-5p, miR-29b, miR-30b-3p, miR-26a-2-3p, miR-206-3p, miR-378c, miR-4510, miR-214, miR-665-5p, miR-664a, miR-129-5p, miR-4492, miR-664a-5p, miR-376e-3p, miR-6130, miR-323-5p, miR-221-5p, miR-32-5p, miR-378a-3p, miR-3065-3p, miR-2312, let-7g-3p, miR-129b-3p, miR-411, miR-125b-2-3p, miR-376c-3p, miR-216c-5p, miR-221-5p, miR-26a-5p, miR-185-3p, miR-422a, miR-383-5p, miR-532-3p, miR-18a-3p, miR-218-1-3p, miR-2284u, novel\_133, miR-378i, miR-1197-5p, miR-188-3p, miR-378a-3p, miR-140-3p, miR-361-3p, miR-877-3p, novel\_60, miR-3059-5p, miR-3956-3p, miR-363-3p, miR-2285f, miR-9-5p, miR-452-5p, miR-4726-5p, miR-301a-5p, miR-378e, miR-3064-5p, miR-2284g, miR-452-3p, miR-3963, miR-493-5p, miR-1983, miR-361-3p, miR-378d, miR-4532, miR-758-3p, miR-1388-3p, miR-2284b, miR-3085-3p, miR-214-3p, miR-342, miR-1343-3p, miR-2300a-5p, miR-1388-5p, miR-378c, miR-450b-5p, miR-296-5p, miR-378b, miR-301b-5p, miR-1a-3p, miR-412-3p, miR-125b-2-3p, miR-30b-3p, miR-3962, miR-758-3p

miR-125a, miR-370-3p, miR-874-3p, miR-376c-3p, miR-324-5p, miR-300-3p, miR-3154, miR-30e-5p, miR-485-5p, miR-671-5p, miR-7144-5p, miR-345-5p, miR-876-3p, miR-10a-3p, miR-10b-3p, miR-16-5p, miR-1197-3p, miR-331-3p, miR-125b-5p, novel\_79, miR-222, miR-582-3p, miR-322-5p, miR-24-2-5p, miR-505-5p, miR-330-5p, miR-30a-5p, miR-10a-5p, miR-30c, miR-181a-2-3p, miR-3064-5p, miR-30a-3p, miR-3529-3p, novel\_39, miR-1957a, miR-24-2-5p, miR-339a, miR-30f, miR-30c-2-3p, miR-6119-5p, novel\_127, novel\_96, miR-107, miR-2898, miR-10a-5p, miR-320b, miR-329-5p, novel\_68, novel\_69, miR-374c-3p, miR-323a-5p, miR-18a-3p, miR-2387, miR-195a-5p, miR-6395, miR-9851-3p, miR-107, miR-335-5p, miR-2428, miR-326-3p, miR-371b-3p, miR-16a, miR-6402, miR-15a, miR-502b, miR-421-5p, miR-26b-3p, miR-339-5p, miR-103a-3p, miR-187-3p, miR-2355-3p, miR-103, miR-194-3p, miR-149-5p, miR-185-5p, miR-134-3p, miR-503-5p, miR-3071-5p, novel\_23, miR-22-3p, miR-1843b-5p, miR-873a-5p, miR-7862, miR-497-5p, miR-3432b, miR-30b-3p, miR-16b, miR-363-5p, miR-345-5p, miR-432-3p, miR-654-3p, novel\_51, miR-503-5p, miR-125a-5p, miR-378a-5p, miR-504-5p, miR-30c-1-3p, miR-15b-5p, miR-22-3p, miR-216b-5p, miR-323-5p, miR-6130, miR-499b-3p, miR-376e-3p, miR-10a, miR-30d-5p, miR-129b-3p, let-7f-1-3p, miR-625-5p, miR-30f, miR-345-5p, miR-339b, miR-425-5p, miR-2330-3p, miR-4510, miR-6134, miR-6525, miR-10b-5p, miR-320e, miR-665, miR-30a-3p, miR-30e-3p, miR-222-3p, miR-424-5p, miR-4492, miR-664a, miR-30d-3p, miR-212-5p, miR-18a-3p, miR-328-3p, miR-616-3p, miR-532-3p, miR-15a-5p, miR-383-5p, miR-1197-5p, miR-30c-5p, miR-33b-3p, miR-503-5p, miR-10a-3p, miR-329a-5p, miR-183-5p, miR-130a-5p, miR-376c-3p, miR-421-5p, miR-185-3p, miR-125b, miR-324-3p, miR-210-5p, miR-30b, miR-30b-3p, miR-30d, miR-760-3p, miR-202-5p, miR-7689-

miR-2411, miR-376a-5p, miR-20a, miR-345-3p, miR-216c-5p, miR-329a-5p, miR-30d, miR-106a, miR-500a-5p, miR-125b, miR-92a-1-5p, miR-345-3p, novel\_17, miR-199a-3p, miR-1247-5p, miR-7859, miR-106a, miR-16-1-3p, miR-4429, novel\_73, miR-2904, miR-1193, miR-5703, miR-2300b-3p, miR-338-3p, miR-4510, miR-130b-5p, miR-669a-3p, miR-450b-3p, miR-17-3p, miR-219b-3p, miR-19b-1-5p, miR-3604, miR-2285j, miR-204-3p, miR-544-3p, miR-2284s, miR-499b-3p, miR-377-3p, miR-193b-3p, miR-6130, miR-139-5p, miR-296-3p, miR-182-5p, miR-625-5p, miR-543-3p, miR-186-5p, miR-2312, miR-30d-5p, miR-450a-1-3p, miR-2285c, miR-193a, miR-106a-5p, miR-494-3p, miR-101b-3p, miR-103a-2-5p, miR-106b-5p, miR-182-5p, miR-199a-3p, miR-320b, miR-326, miR-455-3p, miR-216a-3p, miR-2285e, miR-409b, miR-199b-3p, novel\_78, miR-2284aa, miR-544a, miR-3962, miR-484, miR-2284r, miR-541, miR-219a-2-3p, miR-2285f, miR-3059-5p, novel\_60, miR-2447, miR-541-3p, miR-3956-3p, miR-7134-3p, miR-3968, miR-371a-5p, miR-107-5p, miR-218-5p, miR-499a-3p, miR-7977, miR-4792, miR-139-5p, miR-335-3p, miR-136-5p, miR-1306-3p, miR-140-5p, miR-450b-5p, miR-17-3p, miR-127-5p, miR-1260a, miR-219-3p, miR-450a-1-3p, miR-134-5p, miR-2284z, miR-2411-5p, miR-330-5p, miR-345-3p, miR-134, miR-93, miR-1260b, miR-6128, miR-134-5p, miR-125b-5p, miR-135a-5p, miR-410-5p, miR-1306-3p, miR-2355-5p, miR-2285aa, miR-125a, miR-20b-5p, miR-7144-5p, miR-2318, miR-329b, miR-93-5p, miR-320a, miR-17-5p, let-7j, miR-296-3p, miR-432-3p, miR-668-3p, miR-130b-5p, miR-125a-5p, miR-452-5p, miR-193a-3p, miR-17-5p, miR-106a-5p, miR-2411-3p, miR-296-3p, novel\_116, miR-544b, miR-20b, miR-2285g, miR-185-5p, miR-6239, miR-1260b, miR-16-1-3p, miR-450c-3p, miR-3071-5p, miR-19b-2-5p, miR-708-3p, miR-1434-3p, miR-542-3p, novel\_27, miR-326-3p, miR-2284w, miR-24-3p, miR-193b-3p, miR-17-3p, miR-105-

miR-362-5p, miR-9-3p, miR-452-5p, miR-2285n, miR-30b-5p, miR-7857-3p, miR-378e, miR-376d, let-7d-5p, miR-20a-3p, miR-3064-5p, miR-499b-5p, miR-541-5p, miR-129b-5p, miR-30c-1-3p, miR-193a, let-7a-5p, miR-33a-5p, miR-3955-3p, miR-3085-3p, miR-2285o, let-7e, novel\_103, miR-320b, miR-2957, miR-500-5p, miR-9788-3p, novel\_4, miR-2300a-5p, miR-151a-3p, miR-5010-3p, miR-101a-5p, miR-450b-5p, miR-378c, miR-16-2-3p, miR-4791, miR-10b, miR-378b, miR-206-3p, miR-10b-5p, let-7b-5p, miR-378c, miR-2330-3p, miR-155-5p, miR-655-3p, miR-155-5p, miR-378a-3p, miR-27b-5p, miR-29b-1-5p, miR-2432, miR-21-3p, miR-30d, miR-216a-5p, miR-616-3p, miR-548e-3p, miR-4429, miR-378d, miR-1197-5p, miR-1193, miR-5703, miR-3959-3p, miR-24-3p, novel\_27, miR-136-3p, novel\_101, novel\_1, miR-147-5p, miR-199c, miR-656-5p, miR-22-5p, let-7i, miR-382-5p, miR-10a-5p, miR-2285k, miR-135b-5p, miR-6516-3p, miR-7975, miR-2387, miR-376b-3p, miR-378b, miR-654-3p, miR-2285l, miR-503-5p, let-7g-5p, miR-503-5p, miR-185-5p, miR-2355-3p, miR-6238, miR-187-3p, miR-377-5p, miR-1260b, miR-1434-3p, miR-653, miR-323-3p, miR-500b-5p, miR-378c, miR-365a-5p, miR-767-5p, miR-1-5p, miR-135a-5p, miR-409-3p, miR-331-3p, miR-141-3p, novel\_91, miR-10b-3p, novel\_48, miR-503-3p, miR-381-3p, miR-362-5p, miR-320a, miR-1, miR-30a-3p, miR-2898, miR-543-5p, miR-6119-5p, miR-376b-3p, miR-1260a, let-7c-5p, miR-30c-2-3p, miR-378h, miR-582-3p, miR-545-5p, let-7d, miR-300, miR-411-3p, miR-10a-5p, miR-134, miR-345-3p, miR-30a-5p, novel\_111, miR-885-5p, miR-499a-5p, miR-628-3p, miR-3964, miR-2440, miR-301a-5p, miR-25, miR-203-3p, miR-2319b, miR-7689-3p, miR-2285u, miR-136-5p, miR-9-3p, miR-376a-3p, miR-378d, miR-8485, miR-101b-3p, miR-1388-3p, miR-744-3p, miR-491-5p, miR-214-3p, miR-29b-1-5p, miR-505, miR-142-5p, miR-376b-3p, miR-491, miR-199b-3p, miR-1830-5p, miR-301b-

COG5

ENSOARGO0 componen

miR-33b-5p, miR-576-3p, miR-3074-5p, miR-329-5p, miR-320c, miR-1306, miR-3141, miR-376b-5p, miR-378f, miR-2284e, miR-2284l, miR-432-3p, novel\_51, miR-365b-5p, miR-3141, miR-378a-5p, miR-339-5p, miR-103a-3p, miR-194-3p, novel\_116, miR-343l, miR-134-3p, miR-3535, miR-22-3p, miR-197-3p, miR-1843b-5p, miR-19b-2-5p, miR-2284x, miR-188-5p, miR-497-5p, miR-16b, miR-16-5p, miR-2284v, miR-1197-3p, miR-6740-5p, miR-2284k, miR-1271, miR-2285aa, miR-376c-5p, miR-1248, miR-329b, miR-876-3p, miR-3064-5p, miR-200a-3p, novel\_96, miR-127-5p, miR-18b-5p, miR-1224-5p, novel\_79, miR-412, novel\_121, miR-129-1-3p, miR-322-5p, miR-2427, miR-2284j, miR-190b-5p, miR-3956-3p, miR-423-5p, novel\_111, miR-877-3p, miR-361-3p, miR-2440, novel\_82, miR-211-5p, miR-2285u, miR-378g, miR-544-5p, miR-504, miR-299b-5p, miR-676-3p, miR-2310, miR-378d, miR-16b, miR-29b-1-5p, miR-491-5p, miR-145b, miR-1343-3p, miR-148b-5p, miR-147a, miR-665-5p, miR-3074-5p, miR-129-2-3p, miR-3184-5p, miR-769-5p, miR-664a-5p, miR-2285j, miR-500, miR-190a-5p, miR-1468-5p, miR-4492, miR-129-5p, miR-874-5p, novel\_74, miR-296-3p, miR-548o-3p, miR-504-5p, miR-15b-5p, miR-216b-5p, miR-10a, miR-500a-3p, miR-543-3p, miR-339b, miR-345-3p, miR-329a-5p, miR-377-5p, miR-422a, miR-92a-1-5p, miR-324-3p, miR-26a-5p, miR-2285p, miR-618, novel\_17, miR-212-5p, miR-328-3p, miR-7859, miR-378a-3p, miR-1434-5p, miR-193b-5p, miR-378i, miR-148a-5p, miR-133a-3p, miR-33b-3p, miR-17-3p, miR-136-3p, miR-2428, miR-323c, miR-371b-3p, miR-211, miR-16a, miR-6529b, miR-15a, miR-656-5p, miR-22-5p, miR-10a-5p, miR-2404, miR-378b, miR-18b, miR-6395, miR-195a-5p, miR-107, miR-2483-5p, miR-654-3p, miR-136-3p, miR-190a, miR-377-5p, miR-103, miR-544b, miR-2355-3p, miR-374b-3p, miR-145a-5p, miR-873a-5p, miR-2284ab, miR-30b-3p, miR-1306-5p, miR-378c, miR-365a-5p, miR-

miR-23a-3p, miR-199a-3p, miR-16b, miR-182-5p, miR-103a-2-5p, miR-146b, miR-330-3p, novel\_78, miR-548w, miR-181b-2-3p, miR-425-3p, miR-455-3p, miR-329-3p, miR-1388-5p, miR-362-3p, miR-101c, miR-885-5p, miR-2447, miR-1285-5p, miR-628-3p, miR-1843a-3p, miR-2319b, miR-2285u, miR-374b-5p, miR-2483-3p, miR-25, miR-378g, miR-203-3p, miR-221, miR-381-3p, miR-9-3p, miR-369-3p, miR-181b-1-3p, miR-377-5p, miR-486-3p, miR-2424, miR-26a-5p, miR-2285p, miR-345-3p, miR-202-5p, miR-23c, miR-7859, miR-23b-3p, miR-30c-5p, miR-1434-5p, miR-217-5p, miR-33b-3p, novel\_73, miR-361-5p, miR-16-1-3p, miR-218-1-3p, miR-3074-5p, miR-433-5p, miR-224-5p, miR-142a-5p, miR-181c-5p, miR-665, miR-219b-3p, miR-4492, miR-500, miR-30c-1-3p, miR-15b-5p, miR-30d-5p, miR-411, miR-655, miR-129b-3p, miR-500a-3p, miR-186-5p, miR-6240, miR-628-5p, miR-668-3p, miR-2284l, miR-432-3p, miR-432-3p, miR-146a, miR-2411-3p, miR-3955-5p, miR-3431, miR-134-3p, miR-2113, miR-542-3p, miR-16-1-3p, miR-16b, miR-2284x, miR-497-5p, miR-2284w, miR-374c-5p, miR-379-3p, miR-3074-5p, miR-26b-5p, miR-374c-3p, miR-181b-3p, miR-320c, miR-677, miR-3065-5p, miR-3970, miR-146b-5p, miR-3064-5p, miR-2285b, novel\_39, miR-29a-5p, miR-219-3p, miR-30f, miR-127-5p, miR-200a-3p, miR-429-3p, miR-2285ad, miR-758-5p, miR-322-5p, miR-505-5p, miR-486-5p, miR-2284z, miR-134-5p, miR-1290, miR-330-5p, miR-2284v, miR-16-5p, miR-2284k, miR-134-5p, miR-574-5p, miR-2285aa, miR-30e-5p, miR-23b, miR-329a, miR-767, miR-424-5p, miR-33a-5p, miR-30c-1-3p, novel\_115, miR-326, miR-320b, miR-362-3p, miR-3955-3p, miR-3085-3p, novel\_4, miR-5010-3p, miR-221-3p, miR-9788-3p, miR-30b-3p, miR-2284aa, miR-181d-5p, miR-452-5p, miR-219a-2-3p, miR-2285n, miR-30b-5p, miR-107-5p, miR-371a-5p, miR-2284q, miR-374a-3p, miR-20a-3p, miR-3064-5p, miR-499b-5p, miR-7857-3p, miR-129b-5p, novel\_94, miR-183-5p, miR-130a-5p, miR-

miR-1197-3p, miR-1260b, miR-16-5p, miR-134-5p, miR-125b-5p, novel\_63, miR-3959-5p, miR-125a, miR-1271, miR-2285aa, miR-874-3p, miR-1248, miR-2318, miR-345-5p, miR-876-3p, miR-200a-5p, miR-137-3p, miR-301, miR-29a-5p, novel\_39, miR-148b-5p, miR-152-3p, novel\_127, miR-205-5p, miR-129-1-3p, miR-450a-1-3p, miR-134-5p, miR-322-5p, miR-18b-5p, miR-1224-5p, miR-429-3p, miR-330-5p, miR-1290, miR-301b-3p, miR-199b-5p, miR-29c-3p, miR-29a, miR-576-3p, miR-4324, miR-181b-3p, miR-677, miR-374c-3p, miR-411b-3p, miR-3120-3p, miR-329-5p, novel\_68, miR-410-5p, miR-3591-3p, miR-150-5p, miR-3970, miR-148a-3p, miR-432-3p, miR-432-3p, miR-668-3p, miR-380-5p, miR-194a, miR-2411-3p, novel\_51, miR-105-5p, miR-296-3p, novel\_116, miR-411-5p, miR-149-5p, miR-3431, miR-188-5p, miR-27b-3p, miR-497-5p, miR-16-1-3p, miR-16b, miR-197-3p, miR-450c-3p, miR-223-3p, miR-142a-5p, miR-214, miR-3958-5p, miR-129-2-3p, miR-454-3p, novel\_74, miR-30a-3p, miR-30e-3p, miR-15b-5p, miR-301a-3p, miR-10a, miR-154a-3p, miR-2331-3p, miR-543-3p, miR-345-5p, miR-450a-1-3p, miR-143-3p, miR-2424, miR-486-3p, miR-181b-1-3p, miR-377-5p, miR-376a-5p, miR-195a-3p, miR-487a, miR-2285w, miR-329a-5p, miR-345-3p, miR-500a-5p, novel\_17, miR-210-5p, miR-618, miR-328-3p, miR-2284h-5p, miR-30d-3p, miR-18a-3p, miR-16-1-3p, novel\_73, miR-361-3p, miR-2447, miR-154-3p, miR-2440, novel\_82, miR-218-5p, miR-2483-3p, miR-3596, miR-24-1-5p, miR-544-5p, miR-3963, miR-96-5p, miR-8485, miR-103a-2-5p, miR-214-3p, miR-199b-5p, miR-130b-3p, miR-1185-5p, miR-16b, miR-29b-1-5p, miR-2459, miR-455-3p, miR-148b-5p, miR-539-5p, miR-1298-3p, miR-142-5p, miR-181b-2-3p, miR-548w, novel\_78, miR-1343-3p, miR-758-3p, miR-541, miR-145-3p, miR-374a-3p, miR-103b, miR-6128, miR-486b-3p, miR-374b-3p, miR-204-5p, miR-31-3p, miR-138-5p, miR-331-3p, miR-29b-3p, miR-410-5p, miR-154b-5p, miR-100a-5p, miR-324-3p, miR-362-3p, miR-185-3p, miR-194a, miR-342, miR-5126, miR-30b-3p, novel\_96, miR-491-5p, novel\_124, miR-25-5p, miR-4532, novel\_39, miR-3065-3p, miR-2478, miR-194-5p, miR-30b-3p, miR-484, miR-329-3p, miR-362-3p, miR-4508, miR-362-3p, miR-30b-3p, miR-2285ad, miR-548w, miR-149-5p, miR-9788-3p, miR-2459, miR-6740-5p, miR-2285y, miR-26c, novel\_82, miR-2285n, miR-4492, miR-4726-5p, miR-1296-5p, miR-193a-5p, miR-194b-5p, miR-665-5p, miR-342-3p, miR-3184-5p, miR-423-5p, miR-24-3p, novel\_48, miR-3963, miR-329a, miR-3065-3p, miR-10b, miR-4443, miR-877-5p, miR-670-3p  
miR-3059-5p, miR-452-5p, miR-214, miR-376a-5p, miR-29a-5p, miR-338-3p, miR-380-3p, miR-2284w, miR-6134, miR-502-5p, miR-576-3p, miR-6740-5p, miR-107-5p, miR-135a-5p, miR-21-3p, miR-214-3p, miR-6517, miR-323a-5p, miR-432-5p, miR-323-5p, miR-185-5p, miR-432, miR-193b-5p, miR-5703, miR-380-3p, miR-10b-3p, miR-3432b, miR-218-1-3p, miR-6516-3p, miR-135b-5p

HEPH ENSOARGO( hephaest

LRRC23 ENSOARGO( leucine

TSPAN31 ENSOARGO( tetraspa



miR-21-3p, miR-320d, miR-466i-5p, miR-219b-5p, miR-500a-5p, miR-125b, miR-345-3p, miR-196a-3p, miR-146a-5p, miR-2411, miR-2432, miR-376a-5p, miR-130a-5p, miR-148a-5p, miR-4429, miR-33b-3p, miR-2904, miR-5703, miR-376a-5p, miR-2300b-3p, novel\_83, miR-1247-5p, miR-148b-3p, miR-3600, miR-487a-5p, miR-130b-5p, miR-450b-3p, miR-155-5p, miR-6516-3p, miR-664a, miR-219b-3p, miR-665, miR-655-3p, miR-6134, miR-338-3p, miR-2330-3p, miR-539-5p, miR-4510, novel\_99, miR-582-5p, miR-345-5p, miR-655, miR-450a-1-3p, miR-155-5p, miR-582-5p, miR-139-5p, miR-6130, miR-370-5p, miR-552-3p, miR-2331-3p, miR-32-5p, miR-504-5p, miR-146b, miR-1185-5p, miR-3955-3p, miR-2957, miR-320b, novel\_115, miR-3187-3p, miR-1b-5p, miR-376b, miR-101c, miR-21b, miR-2284aa, miR-101a-5p, miR-30b-3p, miR-484, miR-9788-3p, miR-455-3p, miR-148b-5p, miR-2459, miR-539-5p, miR-105-1, miR-374a-3p, miR-335, miR-218-5p, miR-1285-5p, miR-219a-2-3p, miR-9-5p, miR-3059-5p, miR-363-3p, miR-335-3p, miR-9-3p, miR-504, miR-136-5p, miR-129b-5p, miR-361-3p, miR-7857-3p, miR-2483-3p, miR-3082-5p, miR-211-5p, miR-126b-5p, miR-7977, miR-139-5p, miR-2319b, miR-20a-3p, miR-200a-3p, miR-92a-3p, miR-152-3p, miR-450a-2-3p, miR-2898, miR-28-3p, miR-6536, miR-1a-2-5p, miR-1260a, miR-6119-5p, miR-219-3p, miR-2397-5p, novel\_39, miR-200a, miR-450b-5p, miR-92b-3p, miR-495-5p, miR-105-2, miR-155-5p, let-7a-2-3p, miR-300, miR-2427, miR-345-3p, miR-582-3p, miR-450a-1-3p, miR-2284z, miR-302a-5p, miR-9-5p, miR-2411-5p, miR-204-5p, miR-374b-3p, miR-138-5p, miR-767-5p, miR-125b-5p, miR-1-5p, miR-410-5p, miR-370-5p, miR-145-3p, miR-374a-3p, miR-1260b, miR-193a-5p, miR-28a-3p, miR-7144-5p, miR-23a-5p, miR-485-5p, miR-1248, miR-767, miR-10b-3p, miR-345-5p, let-7g-3p, miR-320a, miR-3154, miR-25-3p, miR-370-3p, miR-141-3p, miR-125a, miR-3068-3p, miR-125a-5p, miR-105-5p, miR-32, miR-2411-5p, novel\_68, miR-2319b, miR-3074-5p, miR-20a-3p, miR-541-5p, miR-299b-3p, miR-203-3p, miR-378b, miR-129b-5p, miR-216a-3p, miR-452-5p, miR-8095, miR-7705, miR-485-3p, miR-206, novel\_1, miR-421-5p, miR-656-5p, miR-374a-3p, miR-2284q, miR-147a, miR-216a-3p, miR-223-3p, miR-1a-3p, novel\_23, miR-758-3p, miR-1260b, miR-2284aa, miR-130b-5p, let-7c-3p, miR-33a-5p, miR-296-3p, miR-758-3p, let-7a-2-3p, miR-431-5p, miR-296-3p, miR-2957, miR-29b-1-5p, novel\_51, miR-2331-3p, miR-370-3p, miR-552-3p, miR-532-5p, miR-27a-5p, miR-216b-5p, novel\_25, miR-155-5p, miR-488-3p, miR-2448-3p, let-7g-3p, miR-485-5p, miR-3074-5p, miR-3607-3p, miR-193a-5p, miR-6525, miR-206-3p, miR-374a-3p, miR-1260b, miR-15b-3p, miR-155-5p, miR-129-5p, miR-130b-5p, miR-374b-3p, miR-134-5p, miR-548e-3p, miR-299a-3p, miR-6517, miR-431, miR-7859, miR-2411-5p, miR-2284h-5p, miR-134-5p, miR-2284z, miR-532-3p, miR-134, miR-140-3p, miR-128-3p, miR-155-5p, let-7a-2-3p, miR-183-5p, miR-2285w, miR-1, miR-29b-1-5p, miR-450b-5p, miR-130a-5p, miR-125b-2-3p, miR-2411, miR-1271-3p, miR-1260a, miR-2285p, miR-374a-5p, miR-760-3p, miR-466i-5p, miR-127-5p, miR-299-3p, miR-543-5p, miR-2484

SCFD1 ENSOARGO(sec1 fam

SUN5 ENSOARGO(Sad1 and

|         |                    |                                                                                                                                                                                                                                                                                                                                                                                                                                                                                                                                                                                                                                                                                                                                                                                                                                                                                                                                                                                                                                                                                                                                                                                                                                                                                                                                                                                                                                                                                                                                                                                                                                                                                                                                                                                                                                                                                                                                                                                                                              |
|---------|--------------------|------------------------------------------------------------------------------------------------------------------------------------------------------------------------------------------------------------------------------------------------------------------------------------------------------------------------------------------------------------------------------------------------------------------------------------------------------------------------------------------------------------------------------------------------------------------------------------------------------------------------------------------------------------------------------------------------------------------------------------------------------------------------------------------------------------------------------------------------------------------------------------------------------------------------------------------------------------------------------------------------------------------------------------------------------------------------------------------------------------------------------------------------------------------------------------------------------------------------------------------------------------------------------------------------------------------------------------------------------------------------------------------------------------------------------------------------------------------------------------------------------------------------------------------------------------------------------------------------------------------------------------------------------------------------------------------------------------------------------------------------------------------------------------------------------------------------------------------------------------------------------------------------------------------------------------------------------------------------------------------------------------------------------|
| SLC10A2 | ENSOARGO(solute c) | miR-380-5p, miR-323-3p, miR-362-5p, miR-500b-5p, miR-380-5p, miR-133a-3p, miR-466i-5p, miR-2285j, miR-3604, miR-323b-3p, miR-500a-5p, miR-500-5p, miR-219a-1-3p, miR-133b-3p, novel_99, miR-2448-3p, miR-503-3p, miR-362-5p, miR-129b-5p, miR-323b                                                                                                                                                                                                                                                                                                                                                                                                                                                                                                                                                                                                                                                                                                                                                                                                                                                                                                                                                                                                                                                                                                                                                                                                                                                                                                                                                                                                                                                                                                                                                                                                                                                                                                                                                                           |
| ST3GAL1 | ENSOARGO(ST3 beta) | miR-221-5p, novel_68, miR-125a, miR-7977, miR-6395, miR-485-5p, miR-885-3p, miR-3141, miR-450a-1-3p, miR-433-3p, miR-361-3p, miR-6525, miR-6134, miR-3184-5p, miR-423-5p, miR-145a-3p, miR-129-2-3p, novel_42, miR-664a, miR-128-1-5p, miR-450b-3p, miR-874-5p, miR-30e-3p, miR-218-5p, miR-320e, miR-409-3p, miR-125b-5p, miR-30a-3p, miR-129-1-3p, miR-328-3p, miR-214-5p, miR-450a-1-3p, novel_4, miR-2300a-5p, miR-1343-3p, miR-30d-3p, miR-412, miR-885-3p, miR-218-1-3p, miR-1843b-5p, miR-6529a, miR-140-3p, miR-5703, miR-450c-3p, miR-412-3p, miR-124-3p, miR-1343-5p, miR-432-3p, miR-2424, miR-105-3p, miR-124a, miR-216c-5p, miR-30a-3p, miR-495-5p, miR-125a-5p, miR-1343-5p, miR-221-5p, miR-125b, miR-3141                                                                                                                                                                                                                                                                                                                                                                                                                                                                                                                                                                                                                                                                                                                                                                                                                                                                                                                                                                                                                                                                                                                                                                                                                                                                                                    |
| DUSP8   | ENSOARGO(dual spe) | miR-2433, miR-1247-3p, miR-1343-5p, miR-2411-5p, miR-2411, miR-1343-5p, miR-625-5p                                                                                                                                                                                                                                                                                                                                                                                                                                                                                                                                                                                                                                                                                                                                                                                                                                                                                                                                                                                                                                                                                                                                                                                                                                                                                                                                                                                                                                                                                                                                                                                                                                                                                                                                                                                                                                                                                                                                           |
| MRPL2   | ENSOARGO(mitochon) | miR-3960, miR-2355-5p, miR-2285u, miR-133a-3p, miR-133b-3p, miR-874-5p, miR-133a-3p, miR-2285j, miR-324-3p, miR-2427, miR-454-3p, miR-2285j, miR-15b-3p, miR-30e-3p, miR-30a-3p, miR-142a-5p, miR-3184-5p, miR-181c-5p, miR-1271, miR-665-5p, let-7g-3p, miR-339b, miR-1827, miR-433-3p, miR-301a-3p, miR-6516, miR-27a-5p, miR-499b-3p, miR-204-3p, novel_32, miR-151b, miR-216b-3p, miR-106a, miR-760-3p, miR-3653-3p, miR-34b-5p, miR-618, miR-125b, miR-377-5p, miR-181b-1-3p, miR-125b-2-3p, miR-486-3p, miR-146a-5p, miR-143-3p, miR-380-3p, miR-216c-5p, miR-105-3p, miR-5100, miR-20a, miR-345-3p, miR-33b-3p, miR-34a-5p, miR-140-3p, miR-188-3p, miR-1434-5p, miR-7859, miR-23b-3p, miR-23c, novel_83, miR-151-5p, miR-106a, miR-3600, miR-505-3p, miR-3968, miR-628-3p, miR-2284q, miR-2285n, miR-371a-5p, miR-2285y, miR-877-3p, miR-8095, miR-423-5p, miR-2447, miR-541-3p, miR-2285f, miR-181d-5p, miR-96-5p, miR-499a-3p, miR-2483-3p, miR-203-3p, miR-4443, miR-541-5p, miR-7977, miR-130b-3p, miR-146b, miR-2957, miR-106b-5p, miR-2330-5p, miR-382-3p, miR-106a-5p, miR-23a-3p, miR-450b-5p, miR-101c, miR-2284aa, miR-484, miR-143-5p, miR-541, miR-425-3p, miR-496-5p, miR-142-5p, miR-9788-3p, miR-2300a-5p, miR-181b-2-3p, miR-145b, miR-486b-3p, miR-125b-5p, miR-93, miR-1260b, miR-145-3p, miR-10b-3p, let-7g-3p, miR-20b-5p, miR-671-5p, miR-301, miR-93-5p, miR-23b, miR-3154, miR-17-5p, miR-34c-5p, miR-503-3p, miR-1271, miR-125a, miR-181b-5p, miR-1260a, miR-6119-5p, miR-339a, miR-148b-5p, novel_39, miR-2285b, miR-490-3p, miR-30a-3p, miR-2403, let-7a-2-3p, miR-1290, miR-1271-5p, miR-6516-5p, miR-582-3p, miR-2284z, miR-2285ad, miR-6517, miR-1224-5p, novel_79, miR-6119-3p, miR-203b-5p, miR-22-5p, miR-20a-5p, miR-34c, novel_87, miR-24-3p, miR-449a, miR-301b-3p, novel_120, miR-3957-3p, miR-495-3p, miR-1291, miR-146b-5p, miR-505-3p, miR-2285ab, miR-34b, miR-677, miR-181b-3p, miR-124-5p, miR-2285l, miR-125a-5p, miR-146a, miR-106a-5p, miR-17-5p, let-7a-2-3p, miR-668- |
| NEDD4L  | ENSOARGO(neural p) |                                                                                                                                                                                                                                                                                                                                                                                                                                                                                                                                                                                                                                                                                                                                                                                                                                                                                                                                                                                                                                                                                                                                                                                                                                                                                                                                                                                                                                                                                                                                                                                                                                                                                                                                                                                                                                                                                                                                                                                                                              |

miR-23b, miR-320a, miR-137-3p, miR-488-3p, miR-485-5p, miR-7144-5p, miR-3074-1-3p, miR-329b, miR-10b-3p, miR-374c-3p, miR-16-5p, miR-3591-5p, miR-345-3p, miR-196a-5p, miR-322-5p, miR-30f, miR-664-3p, miR-191-3p, miR-30a-3p, miR-1, miR-29b-2-5p, miR-490-3p, miR-21c, miR-150-5p, miR-2387, miR-195a-5p, miR-19a-3p, miR-3120-3p, miR-7-1-3p, miR-3074-5p, miR-378b, miR-329-5p, miR-181b-3p, miR-677, miR-320c, miR-16a, miR-142b, miR-20a-5p, miR-4324, miR-15a, miR-199c, miR-421-5p, miR-206, novel\_27, miR-371b-3p, miR-3071-5p, miR-22-3p, miR-1434-3p, miR-653, miR-497-5p, miR-21-5p, miR-16b, miR-130a-3p, miR-330-3p, miR-196b-5p, miR-6240, miR-539-3p, miR-22841, miR-432-3p, miR-21a-3p, novel\_99, miR-625-5p, miR-21-3p, miR-545-3p, miR-221-5p, miR-15b-5p, miR-22-3p, miR-656-3p, miR-216b-5p, miR-499b-3p, miR-301a-3p, miR-29b-2-5p, miR-30a-3p, miR-487a-5p, miR-424-5p, miR-454-3p, miR-3074-5p, miR-590-3p, miR-539-5p, miR-206-3p, miR-188-3p, miR-124-3p, miR-1246, miR-378d, miR-218-1-3p, miR-4429, miR-19b-3p, miR-485-3p, miR-3600, miR-106a, novel\_83, miR-15a-5p, miR-23b-3p, miR-487a-3p, miR-345-3p, miR-324-3p, novel\_17, miR-2484, miR-221-5p, miR-3653-3p, miR-106a, miR-320d, miR-20a, miR-195a-3p, miR-380-3p, miR-181b-1-3p, miR-421-5p, miR-378j, miR-668-5p, miR-452-3p, miR-664b, miR-499a-3p, miR-301a-5p, miR-490-5p, miR-3968, miR-3956-3p, miR-3059-5p, novel\_60, miR-125b-2-3p, miR-1a-3p, miR-323b, miR-301b-5p, miR-181b-2-3p, miR-222-5p, miR-330-3p, miR-199b-3p, miR-539-5p, miR-16b, miR-323b-3p, novel\_103, miR-320b, miR-130b-3p, miR-376b, miR-23a-3p, miR-424-5p, miR-106a-5p, miR-124a, miR-2310, miR-1b-5p, miR-3187-3p, miR-8485, miR-193a  
miR-2483-5p, let-7c-3p, miR-2330-5p, miR-2285r, miR-29b-1-5p, miR-2957, miR-377-3p, miR-452-5p, miR-1343-3p, miR-105-1, miR-2459, miR-1298-3p, miR-134-3p, novel\_23, miR-369-5p, miR-188-5p, miR-2426, miR-9-5p, miR-2447, miR-1285-5p, miR-211, miR-2285t, miR-3968, miR-211-5p, miR-2319b, miR-329-5p, miR-6535, miR-2404, miR-499a-3p, miR-378g, miR-378j, miR-2319a, miR-450b-3p, miR-136-5p, miR-29b-2-5p, miR-329a-5p, miR-2432, miR-29b-1-5p, miR-450b-5p, miR-324-3p, miR-216a-5p, miR-2285af, novel\_17, miR-548e-3p, miR-7859, miR-9-5p, miR-2904, miR-2300b-3p, miR-664-5p, miR-105-2, miR-133a-3p, miR-145a-3p, miR-145-3p, miR-6740-5p, miR-369-5p, miR-29b-2-5p, miR-4492, miR-204-5p, novel\_9, miR-2355-5p, miR-2285aa, miR-204-3p, miR-499b-3p, miR-377-3p, miR-7144-5p, miR-1827, miR-133b-3p, miR-10b-3p

ZNF420 ENSOARGO(zinc fin.

NDRG1 ENSOARGO(N-myc do

miR-2285g, novel\_116, miR-6238, miR-103, miR-20b, miR-103a-3p, miR-16-1-3p, miR-22-3p, miR-194-5p, miR-3071-5p, miR-493-5p, miR-6240, miR-2483-5p, miR-363-5p, miR-224-5p, miR-105-5p, miR-330-3p, miR-194a, miR-106a-5p, miR-17-5p, miR-677, miR-181b-3p, miR-410-5p, miR-107, miR-2285ab, miR-24-3p, miR-323c, novel\_27, miR-17-3p, miR-495-3p, miR-2285x, novel\_1, miR-22-5p, miR-147-5p, miR-6402, miR-20a-5p, miR-133a-5p, miR-9-5p, miR-24-2-5p, miR-758-5p, miR-545-5p, miR-2284z, miR-222, miR-105-2, miR-30c, miR-30a-5p, miR-2284y, miR-376c-5p, miR-29a-5p, miR-17-3p, miR-450a-2-3p, miR-127-5p, miR-107, miR-200a-3p, miR-664-3p, miR-331-5p, miR-769, miR-133c, miR-154b-5p, miR-141-3p, miR-3074-1-3p, miR-20b-5p, miR-30e-5p, miR-331-5p, miR-93-5p, miR-137-3p, miR-17-5p, miR-3154, miR-93, miR-1197-3p, miR-6128, miR-331-5p, miR-592, miR-2284k, miR-331-3p, miR-153, miR-455-3p, miR-148b-5p, miR-221-3p, miR-2285e, miR-105-1, miR-330-3p, miR-409b, miR-5010-3p, miR-181b-2-3p, miR-21b, miR-2284aa, miR-382-3p, miR-106a-5p, miR-23a-3p, miR-652-5p, miR-153-3p, miR-103a-2-5p, miR-106b-5p, miR-203-3p, miR-664b, miR-2284g, miR-126b-5p, miR-668-5p, miR-493-5p, miR-361-3p, miR-221, miR-2285f, miR-194b-5p, miR-9-5p, miR-2284j, miR-499a-5p, miR-30b-5p, miR-769-5p, miR-371a-5p, miR-107-5p, miR-7859, miR-23c, miR-548e-3p, miR-106a, novel\_73, miR-16-1-3p, miR-2284u, miR-148a-5p, miR-30c-5p, miR-2904, miR-5703, miR-125b-2-3p, miR-181b-1-3p, miR-2432, miR-216c-5p, miR-20a, miR-106a, miR-2284m, miR-466i-5p, miR-221-5p, miR-30d, miR-21-3p, miR-30b, miR-210-5p, miR-185-3p, miR-6130, miR-216b-5p, miR-22-3p, miR-221-5p, miR-532-5p, miR-296-3p, miR-2312, miR-30f, miR-186-5p, miR-21a-3p, miR-2285c, miR-30d-5p, miR-769-5p, miR-224-5p, miR-4510, miR-3958-5p, miR-17-3p, miR-208b-5p, miR-4492, miR-222-3p, miR-338-5p, miR-664a-5p

miR-134-5p, miR-545-5p, miR-582-3p, miR-758-5p, miR-483-3p, miR-376a-5p, novel\_79, miR-429-3p, miR-299a-3p, miR-10a-5p, miR-105-2, miR-200b-3p, miR-23b-5p, miR-134, miR-1290, miR-345-3p, miR-2285b, miR-200a, miR-3065-3p, miR-29b-2-5p, miR-200a-3p, miR-200c-3p, miR-450a-2-3p, miR-339a, miR-200c, miR-615-5p, miR-141-3p, miR-125a, miR-671-5p, let-7g-3p, miR-2318, miR-329a, miR-362-5p, miR-200a-5p, miR-145-3p, miR-500b-5p, miR-6128, novel\_42, miR-28-5p, miR-134-5p, miR-144, miR-125b-5p, miR-6740-5p, miR-370-5p, miR-2433, miR-544b, miR-2355-3p, novel\_116, miR-149-5p, miR-26b-3p, miR-339-5p, miR-487b-3p, miR-340-3p, miR-187-3p, miR-31-5p, miR-27b-3p, miR-2889, miR-16-1-3p, miR-3071-5p, miR-22-3p, miR-197-3p, miR-1285, miR-873a-5p, let-7a-2-3p, miR-432-3p, miR-654-3p, miR-125a-5p, miR-483-3p, miR-2411-3p, miR-105-5p, miR-144-3p, miR-6535, miR-299b-3p, miR-2404, miR-10a-5p, miR-3074-5p, miR-378b, miR-376a-2-5p, miR-9851-3p, miR-2319a, miR-410-5p, miR-2284w, novel\_27, miR-1193, miR-656-5p, novel\_87, miR-485-3p, miR-133a-5p, miR-3613, miR-502-5p, novel\_83, miR-532-3p, miR-671-3p, miR-616-3p, miR-200b, miR-340-5p, miR-3600, miR-16-1-3p, miR-1197-5p, miR-188-3p, miR-1193, miR-362-3p, novel\_133, miR-2424, miR-29b-1-5p, miR-664b-3p, miR-345-3p, miR-299-3p, miR-30b-3p, miR-125b, miR-345-3p, miR-500a-5p, miR-324-3p, miR-216a-5p, miR-22-3p, novel\_25, miR-204-3p, miR-544-3p, miR-10a, miR-552-3p, miR-3065-3p, miR-216b-3p, miR-370-5p, miR-504-5p, miR-625-5p, miR-339b, miR-411, miR-3613-5p, miR-10b-5p, miR-2330-3p, miR-3958-5p, miR-3074-5p, miR-145a-3p, miR-708-5p, miR-874-5p, miR-6516-3p, novel\_74, miR-29b-2-5p, miR-500-5p, miR-1298-3p, miR-153, miR-27a-3p, miR-1343-3p, miR-105-1, novel\_78, miR-3120-5p, miR-544a, miR-362-3p, miR-758-3p, miR-10b, miR-541, miR-484, miR-329-3p, miR-758-3p, miR-8485, miR-744-3p, miR-2320, miR-125b, miR-500a-5p, miR-324-3p, miR-181b-5p, miR-450a-2-3p, miR-34b-5p, miR-3064-5p, miR-125b-2-3p, miR-376a-5p, miR-192-3p, miR-486-3p, miR-2366, miR-2300b-3p, miR-193b-5p, miR-2904, miR-29d-3p, miR-19b-3p, let-7a-2-3p, miR-34a-5p, miR-128-3p, miR-155-5p, miR-6517, miR-15a-5p, miR-322-5p, miR-9-5p, miR-383-5p, miR-302a-5p, miR-328-3p, miR-5100, miR-29b-3p, miR-665, miR-331-3p, miR-324-3p, miR-125b-5p, miR-155-5p, miR-138-5p, miR-486b-3p, miR-424-5p, miR-4510, miR-1306-5p, miR-133a-3p, miR-16-5p, miR-346, miR-224-5p, miR-500b-5p, miR-6525, miR-181c-5p, miR-122-5p, miR-362-5p, miR-329b, let-7g-3p, miR-133b-3p, miR-1827, miR-543-3p, miR-1271, miR-125a, miR-370-3p, miR-6130, miR-377-3p, miR-34c-5p, miR-155-5p, miR-15b-5p, miR-377-3p, miR-224-5p, miR-16b, novel\_51, miR-3085-3p, miR-125a-5p, miR-424-5p, miR-654-3p, let-7a-2-3p, let-7j, miR-181a-5p, miR-125b-2-3p, miR-219a-1-3p, miR-138, miR-16b, miR-29b, miR-3120-5p, miR-497-5p, novel\_78, miR-133b-5p, miR-31-5p, miR-194-3p, miR-500-5p, miR-142b, miR-15a, miR-34c, miR-16a, miR-29a, miR-3956-3p, novel\_60, miR-495-3p, novel\_101, miR-29c-3p, miR-9-5p, miR-181d-5p, miR-362-5p, miR-361-3p, miR-2285m, miR-449a, miR-361-3p, miR-216a-3p, miR-19a-3p, miR-6395, miR-195a-5p, miR-3064-5p, miR-3120-3p, miR-3082-5p, miR-29a-3p, miR-34b, miR-2404, miR-6535

miR-199c, novel\_1, miR-17-3p, miR-24-3p, miR-371b-3p, miR-211, miR-2387, miR-195a-5p, miR-412-3p, miR-107, miR-2285k, miR-7-1-3p, miR-378b, miR-216b-3p, miR-320c, miR-669, miR-299b-3p, novel\_69, miR-670-3p, miR-2404, miR-323a-5p, miR-2411-3p, novel\_51, miR-582, miR-125a-5p, miR-378a-5p, let-7a-2-3p, miR-539-3p, novel\_23, miR-374b-3p, miR-3071-5p, miR-450c-3p, miR-223-3p, miR-873a-5p, miR-708-3p, miR-7862, miR-497-5p, miR-381-5p, miR-1260b, miR-30b-3p, miR-16b, miR-665, miR-133b-5p, miR-103a-3p, miR-103, miR-125b-5p, miR-331-3p, miR-494-5p, miR-34c-3p, miR-204-5p, miR-486b-3p, miR-16-5p, miR-1306-5p, miR-1260b, miR-320a, miR-3154, miR-381-3p, miR-485-5p, miR-2318, miR-329a, let-7g-3p, miR-10a-3p, miR-141-3p, miR-125a, miR-3071-3p, miR-200c, miR-6119-5p, miR-1260a, miR-205-5p, miR-200a-3p, miR-107, miR-127-5p, miR-200c-3p, miR-17-3p, miR-181a-2-3p, miR-192-3p, miR-200a, miR-148b-5p, miR-218-2-3p, miR-3578, miR-1290, miR-345-3p, miR-200b-3p, miR-300, miR-429-3p, miR-6517, miR-299a-3p, miR-582-3p, miR-450a-1-3p, miR-545-5p, miR-1271-5p, miR-322-5p, miR-218-5p, miR-2285t, miR-499a-5p, miR-3968, miR-3059-5p, miR-2447, miR-154a, miR-8095, miR-877-3p, miR-378j, miR-381-3p, miR-1983, novel\_94, miR-96-5p, miR-126b-5p, miR-211-5p, miR-541-5p, miR-452-3p, miR-203-3p, miR-3082-5p, miR-3596, miR-16b, miR-362-3p, miR-323b-3p, miR-29b-1-5p, miR-199a-3p, miR-320b, miR-1468, miR-381-5p, miR-424-5p, miR-8485, miR-30b-3p, miR-323b, miR-2284r, miR-484, miR-329-3p, miR-1388-5p, miR-362-3p, miR-151a-3p, miR-199b-3p, miR-2300a-5p, miR-455-3p, miR-147a, miR-1298-3p, miR-324-3p, miR-151-3p, miR-424-5p, miR-17-3p, miR-664a, miR-450b-3p, miR-425-5p, miR-1271, miR-539-5p, miR-346, miR-487b-5p, miR-450a-1-3p, miR-21a-3p, miR-1895, miR-552-3p, miR-216b-3p, miR-15b-

ELP2

ENSOARGO(elongato:21a-3p, miR-1895, miR-552-3p, miR-216b-3p, miR-15b-

miR-370-5p, miR-331-3p, miR-132-5p, miR-100-3p, miR-320e, miR-708-5p, miR-486b-3p, miR-28-5p, miR-145a-3p, miR-1271, miR-193a-5p, miR-93, miR-6525, miR-346, miR-3184-5p, miR-93-5p, miR-23b, miR-17-5p, let-7g-3p, miR-10b-3p, miR-20b-5p, miR-1895, miR-1814c, miR-2331-3p, miR-2355-5p, miR-370-5p, miR-377-3p, miR-27a-5p, miR-22-3p, miR-151b, miR-877-5p, miR-324-3p, miR-185-3p, miR-2898, miR-106a, miR-127-5p, miR-466i-5p, miR-107, miR-152-3p, novel\_127, miR-21-3p, miR-20a, miR-4286, miR-376a-5p, miR-486-3p, miR-2432, miR-143-3p, miR-2300b-3p, miR-1290, miR-1343-5p, miR-124-3p, miR-330-5p, miR-33b-3p, miR-128-3p, miR-18a-3p, miR-106a, miR-6517, miR-412, miR-1b-3p, miR-431, miR-23b-3p, miR-148b-3p, miR-1271-5p, miR-222-5p, miR-23c, miR-199a-3p, novel\_83, miR-151-5p, novel\_82, miR-502-5p, miR-4324, miR-20a-5p, miR-33a-3p, miR-628-3p, miR-7134-3p, miR-1193, miR-452-5p, miR-361-3p, miR-371b-3p, miR-423-5p, miR-326-3p, miR-361-3p, miR-148a-3p, miR-216a-3p, miR-18a-3p, miR-96-5p, miR-107, miR-136-5p, miR-877-3p, miR-378g, miR-2404, miR-7-5p, miR-199a-3p, miR-431-5p, miR-377-3p, miR-326, miR-106b-5p, miR-106a-5p, miR-17-5p, miR-1343-5p, miR-124a, miR-106a-5p, miR-494-3p, miR-23a-3p, miR-363-5p, miR-2310, miR-503-3p, miR-296-5p, miR-2284r, miR-1285, miR-7b-5p, miR-542-3p, miR-1434-3p, miR-412-3p, miR-22-3p, miR-103a-3p, miR-1343-3p, miR-134-3p, miR-147a, miR-9788-3p, novel\_116, miR-216a-3p, miR-20b, miR-103, miR-2459

miR-487a, miR-216c-5p, miR-329a-5p, miR-345-3p, miR-181b-1-3p, miR-29b-1-5p, miR-618, novel\_17, miR-30b, miR-345-3p, miR-125b, miR-92a-1-5p, miR-299-3p, miR-30b-3p, miR-18a-3p, miR-485-3p, miR-23c, miR-487a-3p, miR-23b-3p, miR-532-3p, miR-2366, miR-362-3p, miR-30c-5p, miR-124-3p, miR-378d, miR-16-1-3p, miR-145a-3p, miR-3074-5p, miR-206-3p, miR-769-5p, miR-665, miR-17-3p, miR-450b-3p, miR-130b-5p, miR-208b-5p, miR-708-5p, miR-129-5p, miR-1277-3p, miR-548o-3p, miR-30c-1-3p, miR-296-3p, miR-154a-3p, miR-377-3p, miR-204-3p, miR-22-3p, miR-450a-1-3p, miR-30d-5p, miR-154b-3p, miR-30f, miR-339b, novel\_99, miR-186-5p, miR-101b-3p, miR-124a, miR-2284b, miR-23a-3p, miR-30c-1-3p, miR-1306-5p, miR-326, miR-505, miR-362-3p, miR-29b-1-5p, miR-3085-3p, miR-199b-5p, miR-409b, miR-1343-3p, miR-2300a-5p, miR-181b-2-3p, miR-329-3p, miR-30b-3p, miR-1a-3p, miR-2426, miR-1388-5p, miR-362-3p, miR-885-5p, miR-3059-5p, miR-2447, miR-101-3p, miR-30b-5p, novel\_82, miR-769-5p, miR-4726-5p, miR-154-3p, miR-3064-5p, miR-2285u, miR-2483-3p, miR-4443, miR-199b-5p, miR-381-3p, miR-4286, miR-181a-2-3p, miR-1, miR-3064-5p, miR-28b, miR-490-3p, miR-199a-5p, miR-1260a, miR-339a, miR-3071-3p, miR-30c-2-3p, miR-127-5p, miR-17-3p, novel\_127, miR-6517, miR-299a-3p, novel\_79, miR-214-5p, miR-450a-1-3p, miR-345-3p, miR-330-5p, miR-30a-5p, miR-29d-3p, miR-300, miR-411-3p, miR-2284v, miR-1306-5p, miR-1260b, miR-145-3p, novel\_63, miR-29b-3p, miR-125b-5p, miR-767-5p, miR-28-5p, miR-410-3p, miR-874-3p, miR-487a-3p, miR-615-5p, miR-125a, miR-769, miR-199a-5p, miR-381-3p, miR-30e-5p, miR-23b, miR-329a, miR-767, miR-1248, miR-485-5p, miR-7144-5p, miR-130b-5p, miR-2285r, miR-539-3p, miR-377-3p, miR-2411-3p, novel\_51, miR-125a-5p, miR-339-5p, miR-450c-3p, miR-22-3p, miR-197-3p, miR-16-1-3p, miR-1260b, miR-30b-3p, miR-29b, miR-288a, miR-29c-3p, miR-17-



miR-21a-3p, miR-1827, miR-504-5p, miR-140-5p, miR-221-5p, miR-378a-3p, miR-545-3p, miR-216b-3p, miR-132-5p, miR-301a-3p, miR-499b-3p, miR-27a-5p, miR-6130, novel\_32, miR-204-3p, miR-30e-3p, miR-30a-3p, miR-132-5p, miR-320e, miR-6516-3p, miR-17-3p, miR-664a, miR-874-5p, miR-454-3p, miR-129-5p, miR-378c, miR-3074-5p, miR-145a-3p, miR-4510, miR-1271, miR-3074-2-3p, miR-6525, miR-206-3p, miR-6134, miR-378i, miR-2904, miR-124-3p, miR-378a-3p, miR-188-3p, miR-140-3p, miR-493-3p, miR-4429, miR-218-1-3p, miR-16-1-3p, miR-18a-3p, miR-30d-3p, miR-212-5p, miR-383-5p, miR-23b-3p, miR-23c, miR-15a-5p, novel\_83, miR-532-3p, novel\_17, miR-422a, miR-185-3p, miR-345-3p, miR-320d, miR-760-3p, miR-466i-5p, miR-1277-5p, miR-221-5p, miR-21-3p, miR-299-3p, miR-664b-3p, miR-142a-3p, miR-130a-5p, miR-2432, miR-486-3p, miR-361-3p, miR-409-5p, miR-129b-5p, miR-96-5p, miR-299b-5p, miR-504, miR-20a-3p, miR-541-5p, miR-211-5p, miR-499a-3p, miR-378g, miR-378e, miR-2483-3p, miR-203-3p, miR-454-5p, miR-500-3p, miR-4443, miR-218-5p, miR-2285n, miR-2440, miR-2285y, miR-3968, miR-4726-5p, miR-335, miR-450a-5p, miR-7134-3p, miR-2285t, miR-2447, miR-181d-5p, miR-9-5p, miR-452-5p, miR-877-3p, miR-502-3p, miR-8095, miR-378b, miR-484, miR-1a-3p, miR-501-3p, miR-1388-5p, miR-378c, miR-2426, miR-3120-5p, miR-105-1, novel\_78, miR-1343-3p, novel\_4, miR-409b, miR-425-3p, miR-539-5p, miR-142-3p, miR-9788-3p, miR-320b, miR-342, novel\_103, miR-1306-5p, miR-491-5p, novel\_124, miR-130b-3p, miR-3955-3p, miR-25-5p, miR-2285o, miR-1388-3p, miR-124a, miR-2330-5p, miR-424-5p, miR-23a-3p, miR-378d, miR-4532, miR-2310, miR-320a, miR-23b, miR-3154, miR-876-3p, miR-7144-5p, miR-23a-5p, miR-485-5p, miR-671-5p, miR-1814c, miR-542-5p, miR-2355-5p, miR-615-5p, miR-374c-3p, miR-34c-3p, miR-2433, miR-135a-1-3p, miR-144, miR-6740-5p, miR-3069, miR-204-3p, miR-148a-3p, miR-3970, miR-381-3p, miR-3065-5p, miR-3591-3p, miR-299b-5p, miR-107, miR-412-3p, miR-505-3p, miR-1827, miR-1983, miR-195a-5p, miR-221-5p, miR-21-3p, novel\_69, miR-15b-5p, miR-15a, miR-16a, miR-100-3p, miR-138-5p, miR-4492, miR-424-5p, miR-16-5p, miR-1197-3p, novel\_27, miR-2427, novel\_23, miR-16b, miR-138, miR-299a-5p, miR-497-5p, miR-103a-3p, miR-133b-5p, miR-505-3p, miR-322-5p, miR-412-5p, miR-15a-5p, miR-148b-3p, miR-616-3p, miR-194-3p, miR-103, miR-421, miR-205-5p, miR-196a-3p, miR-16b, miR-185-3p, miR-221-5p, miR-107, miR-152-3p, miR-424-5p, miR-4532, miR-2310

ZIC4

ENSOARGO(Zic fami

USP7

ENSOARGO(ubiquiti

|         |                   |                                                                                                                                                                                                                                                                                                                                                                                                                                                                                                                                                                                                                                                                                                                                                                                                                  |
|---------|-------------------|------------------------------------------------------------------------------------------------------------------------------------------------------------------------------------------------------------------------------------------------------------------------------------------------------------------------------------------------------------------------------------------------------------------------------------------------------------------------------------------------------------------------------------------------------------------------------------------------------------------------------------------------------------------------------------------------------------------------------------------------------------------------------------------------------------------|
|         |                   | miR-615-5p, miR-370-3p, miR-154b-5p, miR-1248, miR-7144-5p, miR-1306-5p, miR-3607-3p, miR-16-5p, miR-1260b, miR-145-3p, miR-365a-5p, miR-34c-3p, miR-100-3p, miR-28-5p, miR-126b-3p, miR-6517, miR-222, miR-758-5p, miR-322-5p, let-7d, miR-28b, novel_39, let-7g, miR-8117, miR-1260a, let-7c-5p, let-7f-5p, novel_96, novel_127, miR-3074-5p, novel_68, miR-18a-3p, miR-1291, let-7e-5p, miR-195a-5p, miR-24-3p, miR-2428, miR-28c, miR-15a, miR-1247-3p, let-7i, miR-16a, miR-128-1-5p, miR-665, let-7g-5p, miR-185-5p, miR-2285g, miR-149-5p, miR-873a-5p, miR-381-5p, miR-219a-1-3p, miR-1260b, miR-16b, miR-30b-3p, miR-2284x, miR-497-5p, miR-432-3p, novel_51, miR-365b-5p, miR-2331-3p, miR-532-5p, miR-132-5p, let-7i-5p, miR-15b-5p, miR-877-5p, miR-151b, miR-2285c, miR-1827, miR-543-3p, miR-      |
| KLC4    | ENSOARGO(kinesin  | 3074-5p, miR-3184-3p, let-7b, miR-214, miR-665-5p, miR-6525, miR-3184-5p, let-7b-5p, miR-222-3p, let-7f, miR-665, miR-874-5p, miR-4492, miR-424-5p, miR-708-5p, miR-18a-3p, miR-15a-5p, miR-151-5p, miR-199a-3p, miR-1961, miR-140-3p, miR-1197-5p, miR-33b-3p, miR-345-3p, miR-29b-1-5p, miR-185-3p, miR-324-3p, miR-98-5p, miR-760-3p, let-7k, let-7d-5p, miR-409-5p, miR-221, miR-361-3p, miR-140-5p, miR-668-5p, miR-541-3p, miR-361-3p, miR-423-5p, miR-107-5p, miR-301a-5p, miR-1343-3p, miR-2459, miR-2285e, miR-221-3p, miR-9788-3p, miR-455-3p, miR-301b-5p, miR-541, miR-296-5p, miR-30b-3p, miR-450b-5p, miR-1388-5p, miR-1839-5p, miR-424-5p, let-7a-5p, miR-193a, miR-4532, miR-199a-3p, miR-16b, miR-29b-1-5p, miR-487b-5p, miR-1185-5p, miR-491-5p, miR-381-5p, miR-103a-2-5p, let-7e, miR-214-3p |
|         |                   | miR-2284r, miR-2387, miR-1306, miR-30b-3p, miR-30b-3p, miR-2474, miR-1260b, novel_4, miR-615-5p, miR-2284s, miR-532-                                                                                                                                                                                                                                                                                                                                                                                                                                                                                                                                                                                                                                                                                             |
| GIPC1   | ENSOARGO(GIPC PDZ | 3p, miR-1260a, miR-1306-5p, miR-185-3p, miR-4726-5p, miR-4492, miR-486b-3p, miR-125b-2-3p, miR-1260b, miR-423-5p, miR-486-3p, miR-3184-5p                                                                                                                                                                                                                                                                                                                                                                                                                                                                                                                                                                                                                                                                        |
|         |                   | miR-29b-1-5p, miR-224-5p, miR-3957-3p, miR-                                                                                                                                                                                                                                                                                                                                                                                                                                                                                                                                                                                                                                                                                                                                                                      |
| FAM155A | ENSOARGO(family w | 320d, novel_124, miR-466i-5p, miR-29b-1-5p, miR-320b, miR-224-5p, miR-320c, miR-147a, miR-128-3p, miR-4429, miR-216a-3p, miR-320a, miR-125b-2-3p                                                                                                                                                                                                                                                                                                                                                                                                                                                                                                                                                                                                                                                                 |

miR-93-5p, miR-3154, miR-17-5p, miR-20b-5p, miR-7144-5p, miR-485-5p, miR-671-5p, miR-2474, miR-370-3p, miR-2355-5p, miR-2285aa, miR-125a, miR-1271, miR-331-3p, miR-125b-5p, miR-6740-5p, miR-2433, miR-6128, miR-193a-5p, miR-365a-5p, miR-2903, miR-93, miR-1197-3p, miR-1260b, miR-1343-5p, miR-23b-5p, miR-330-5p, miR-615-3p, miR-345-3p, miR-10a-5p, miR-582-3p, miR-222, miR-2285ad, miR-423-3p, miR-429-3p, miR-6517, miR-582-3p, miR-505-5p, miR-1271-5p, miR-483-3p, miR-2285af, miR-1260a, miR-200c, miR-6119-5p, miR-125a-3p, miR-543-5p, novel\_96, miR-200c-3p, miR-191-3p, miR-3064-5p, novel\_39, miR-29a-5p, miR-3065-3p, miR-1271-3p, miR-28b, miR-148b-5p, miR-1306, miR-3141, miR-6395, miR-450b-3p, miR-1291, miR-320b, miR-3120-3p, miR-10a-5p, miR-677, miR-6535, miR-669, miR-181b-3p, miR-2404, miR-146b-3p, novel\_69, miR-502-5p, miR-28c, miR-6529b, miR-20a-5p, miR-128-1-5p, miR-542-5p, miR-342-3p, miR-326-3p, miR-24-3p, miR-145a-5p, miR-432, miR-1843b-5p, miR-7b-5p, miR-30b-3p, miR-1260b, miR-377-5p, miR-3955-5p, miR-194-3p, miR-149-5p, miR-20b, miR-432-5p, miR-134-3p, miR-3431, miR-503-5p, miR-365b-5p, miR-3141, miR-2411-3p, novel\_51, miR-106a-5p, miR-17-5p, miR-7-5p, miR-503-5p, miR-377-3p, miR-125a-5p, miR-1343-5p, miR-483-3p, miR-363-5p, miR-130b-5p, miR-432-3p, miR-1827, miR-216b-3p, miR-3065-3p, miR-532-5p, miR-296-3p, miR-182-5p, miR-504-5p, miR-2284s, miR-10a, miR-377-3p, miR-6130, miR-324-3p, miR-132-5p, miR-665, miR-222-3p, miR-4492, miR-130b-5p, novel\_74, miR-664a, miR-214, miR-2330-3p, miR-665-5p, miR-3074-2-3p, miR-4510, miR-145a-3p, miR-3184-3p, miR-6134, miR-10b-5p, miR-6525, miR-124-3p, miR-5703, miR-1193, novel\_133, miR-376a-5p, miR-2300b-3p, miR-218-1-3p, miR-148a-5p, miR-378d, miR-212-5p, miR-106a, miR-532-3p, novel\_83, miR-199a-3p, miR-671-3p, miR-2284b-5p, miR-328-

miR-2285aa, miR-235b-5p, miR-125a, miR-1271, miR-3068-3p, miR-874-3p, miR-25-3p, miR-23b, miR-876-3p, miR-345-5p, miR-329a, miR-193a-5p, miR-1197-3p, miR-125b-5p, miR-100-3p, miR-134-5p, miR-412, miR-2285ad, miR-299a-3p, miR-429-3p, miR-134-5p, miR-129-1-3p, novel\_121, miR-330-5p, miR-23b-5p, miR-155-5p, miR-3064-5p, miR-29a-5p, miR-192-3p, miR-3956-5p, miR-2285b, miR-92b-3p, miR-450b-5p, miR-125a-3p, novel\_96, novel\_127, novel\_68, miR-3074-5p, miR-669, miR-299b-3p, miR-1306, miR-3591-3p, miR-412-3p, miR-29c-3p, miR-374c-5p, miR-2284w, miR-199b-5p, miR-1307-5p, miR-485-3p, novel\_87, miR-142b, miR-6123, miR-29a, miR-31-5p, miR-194-3p, novel\_116, miR-149-5p, miR-412-5p, miR-432, miR-7b-5p, miR-3432b, miR-628-5p, miR-6240, miR-105-5p, novel\_51, miR-7-5p, miR-552-3p, miR-2331-3p, miR-504-5p, miR-151b, miR-129b-3p, miR-1827, miR-345-5p, miR-665-5p, miR-214, miR-3074-5p, miR-129-2-3p, miR-122-5p, miR-6525, miR-30a-3p, miR-665, miR-30e-3p, miR-4492, miR-129-5p, miR-130b-5p, novel\_74, miR-30d-3p, miR-18a-3p, miR-1247-5p, miR-2284h-5p, miR-23b-3p, miR-23c, miR-193b-5p, miR-2366, miR-218-1-3p, miR-34a-5p, miR-33b-3p, miR-345-3p, miR-2285w, miR-486-3p, miR-376a-5p, miR-324-3p, novel\_17, miR-210-5p, miR-4792, miR-378j, miR-335-3p, miR-1983, miR-136-5p, miR-668-5p, miR-504, miR-2447, miR-363-3p, miR-361-3p, novel\_111, novel\_82, miR-3968, miR-1343-3p, miR-199b-3p, miR-330-3p, miR-421, miR-2459, miR-425-3p, miR-323b, miR-758-3p, miR-329-3p, miR-2284r, miR-101c, miR-1388-5p, miR-362-3p, miR-23a-3p, miR-744-3p, miR-8485, miR-323b-3p, miR-29b-1-5p, miR-199a-3p, miR-199b-5p, miR-214-3p, miR-103a-2-5p, miR-491-5p, miR-487b-5p, miR-370-3p, miR-199a-5p, miR-154b-5p, miR-34c-5p, miR-488-3p, miR-7144-5p, miR-671-5p, miR-485-5p, miR-10b-3p, miR-145-3p, miR-331-3p, miR-551b-3p, miR-29b-

HK1            ENSOARG0(hexokina

miR-154b-3p, miR-2318, miR-329a, miR-2312, miR-767, miR-362-5p, miR-200a-5p, miR-450a-1-3p, miR-376c-3p, miR-2284n, miR-199a-5p, miR-544-3p, miR-377-3p, miR-376e-3p, miR-300-3p, miR-3068-3p, miR-503-3p, miR-487a-3p, miR-204-5p, miR-130b-5p, miR-767-5p, miR-450b-3p, miR-409-3p, miR-664a-5p, miR-30a-3p, miR-30e-3p, miR-181c-3p, miR-6525, miR-500b-5p, miR-2330-3p, miR-3074-5p, miR-590-3p, miR-539-5p, miR-148a-5p, miR-105-2, miR-664-5p, miR-140-3p, miR-1197-5p, miR-362-3p, miR-2284z, miR-450a-1-3p, miR-545-5p, miR-9-5p, miR-487a-3p, miR-485-3p, miR-30d-3p, miR-18a-3p, novel\_127, miR-2898, miR-202-5p, miR-450a-2-3p, miR-92a-1-5p, novel\_17, miR-6119-5p, miR-490-3p, novel\_39, miR-29a-5p, miR-199a-5p, miR-376c-3p, miR-130a-5p, miR-376a-5p, miR-2478, miR-30a-3p, miR-487a, novel\_94, miR-877-3p, miR-2319a, miR-136-5p, miR-181a-3p, miR-129b-5p, miR-18a-3p, miR-199b-5p, miR-2285ab, miR-4443, miR-670-3p, miR-2404, miR-378g, miR-211-5p, miR-452-3p, miR-3074-5p, miR-4792, miR-199c, miR-22-5p, novel\_1, miR-3958-3p, miR-502-5p, miR-199b-5p, miR-362-5p, miR-211, miR-9-5p, miR-2285f, miR-3059-5p, miR-342-3p, miR-2284aa, miR-101c, miR-26a-2-3p, miR-2426, miR-544a, miR-362-3p, miR-3071-5p, miR-450c-3p, miR-197-3p, miR-329-3p, miR-544b, miR-500-5p, novel\_116, miR-411-5p, miR-148b-5p, miR-3431, miR-134-3p, miR-153, miR-5010-3p, miR-199b-3p, miR-105-1, miR-199b-5p, miR-153-3p, miR-105-5p, miR-362-3p, miR-377-3p, miR-342, miR-8485, miR-539-3p, miR-33a-5p, miR-130b-5p, miR-574-3p

miR-181c-5p, miR-10b-5p, miR-206-3p, miR-4510, miR-424-5p, miR-874-5p, miR-4492, novel\_74, miR-155-5p, miR-17-3p, miR-664a, miR-320e, miR-3604, miR-155-5p, miR-15b-5p, miR-151b, miR-376e-3p, miR-10a, miR-499b-3p, miR-377-3p, miR-192-5p, miR-6130, miR-3065-3p, miR-21-3p, miR-370-5p, miR-182-5p, miR-30c-1-3p, miR-504-5p, miR-2331-3p, novel\_99, miR-30f, miR-30d-5p, miR-21a-3p, miR-2285c, miR-2411, miR-29b-1-5p, miR-30d, miR-3653-3p, miR-21-3p, miR-299-3p, miR-219b-5p, miR-3601, miR-92a-1-5p, miR-185-3p, miR-345-3p, miR-196a-3p, miR-2285p, novel\_17, miR-210-5p, novel\_83, miR-151-5p, miR-616-3p, miR-487a-3p, miR-23b-3p, miR-148b-3p, miR-23c, miR-15a-5p, miR-222-5p, miR-1b-3p, miR-3600, miR-380-5p, miR-485-3p, miR-16-1-3p, novel\_73, miR-124-3p, miR-5703, miR-217-5p, miR-140-3p, miR-30c-5p, miR-191, miR-1246, miR-215-5p, miR-2366, miR-2300b-3p, miR-452-5p, miR-181d-5p, novel\_60, miR-3956-3p, miR-541-3p, miR-212-3p, miR-490-5p, miR-3964, miR-2285t, miR-2285y, miR-107-5p, miR-301a-5p, miR-30b-5p, miR-2285n, miR-101-3p, miR-615, miR-1185-2-3p, miR-3596, miR-499a-3p, miR-7977, miR-24-1-5p, miR-10b, miR-877-3p, novel\_94, miR-136-5p, miR-504, miR-140-5p, miR-8485, miR-3187-3p, miR-2310, miR-1b-5p, miR-30c-1-3p, miR-23a-3p, miR-124a, miR-2330-5p, miR-382-3p, miR-424-5p, miR-103a-2-5p, miR-491-5p, miR-29b-1-5p, miR-182-5p, miR-16b, novel\_115, miR-9788-3p, miR-1185-3p, miR-421, miR-2285e, miR-145b, miR-2300a-5p, miR-548w, miR-330-3p, miR-2284aa, miR-1a-3p, miR-7857, miR-541, miR-10b, miR-301b-5p, miR-323-3p, miR-16-5p, miR-191-5p, miR-138-5p, miR-26c, miR-144, miR-135a-5p, miR-1-5p, miR-370-5p, miR-2332, miR-215-5p, miR-1814c, miR-485-5p, miR-876-3p, miR-2318, miR-23b, miR-30e-5p, miR-381-3p, novel\_39, miR-3065-3p, miR-24-2-5p, miR-1, miR-181a-2-3p, miR-107, novel\_96, miR-152-3p, miR-450a-2-3p, miR-17-3p, miR-127-

TKTL1 ENSOARG0C transket

|        |                   |                                                                                                                                                                                                                                                                                                                                                                                                                                                                                                                                                                                                                                                                                                                                                                                                                                                                                                                                                                                                                                                                                                                                                                                                                                                                                                                                                                                                                                                                                                                                                                                                                                                                                                                                                                                                                                                                                                                                                                                                                                                                                                                                                                                                                                                                                                                                                                                                                                                                                             |
|--------|-------------------|---------------------------------------------------------------------------------------------------------------------------------------------------------------------------------------------------------------------------------------------------------------------------------------------------------------------------------------------------------------------------------------------------------------------------------------------------------------------------------------------------------------------------------------------------------------------------------------------------------------------------------------------------------------------------------------------------------------------------------------------------------------------------------------------------------------------------------------------------------------------------------------------------------------------------------------------------------------------------------------------------------------------------------------------------------------------------------------------------------------------------------------------------------------------------------------------------------------------------------------------------------------------------------------------------------------------------------------------------------------------------------------------------------------------------------------------------------------------------------------------------------------------------------------------------------------------------------------------------------------------------------------------------------------------------------------------------------------------------------------------------------------------------------------------------------------------------------------------------------------------------------------------------------------------------------------------------------------------------------------------------------------------------------------------------------------------------------------------------------------------------------------------------------------------------------------------------------------------------------------------------------------------------------------------------------------------------------------------------------------------------------------------------------------------------------------------------------------------------------------------|
| RAB14  | ENSOARGO(RAB14, m | <p>miR-2285ad, miR-3600, miR-505-5p, miR-148b-3p, miR-582-3p, miR-151-5p, miR-545-5p, novel_121, miR-30c-5p, miR-29d-3p, miR-30a-5p, miR-23b-5p, miR-300, miR-19b-3p, let-7a-2-3p, miR-3064-5p, miR-28b, miR-148b-5p, miR-142a-3p, miR-3065-3p, miR-2285af, miR-30b, miR-8117, miR-3071-3p, miR-216a-5p, miR-17-3p, miR-2898, miR-152-3p, miR-200a-3p, miR-21-3p, miR-3065-3p, miR-2285aa, miR-21-3p, miR-370-5p, miR-141-3p, miR-301a-3p, miR-6130, miR-151b, miR-381-3p, miR-30e-5p, miR-21a-3p, miR-503-3p, miR-2285c, miR-376c-5p, miR-30d-5p, let-7g-3p, miR-30f, let-7g-3p, miR-7144-5p, miR-625-5p, miR-376c-5p, miR-1827, miR-671-5p, miR-3184-3p, miR-4510, miR-214, miR-144-5p, miR-338-3p, miR-2285j, miR-29b-3p, miR-370-5p, miR-324-3p, miR-665, miR-17-3p, miR-454-3p, miR-708-5p, miR-28-5p, miR-130b-5p, miR-31-5p, miR-130a-3p, miR-496-5p, miR-2285g, miR-185-5p, miR-142-3p, miR-1185-3p, miR-2285e, miR-301b-5p, miR-1434-3p, miR-374b-3p, miR-29b, miR-188-5p, miR-3120-5p, miR-130b-5p, let-7c-3p, miR-363-5p, let-7f-2-3p, let-7f-2-3p, let-7a-2-3p, miR-3085-3p, miR-130b-3p, miR-214-3p, miR-3064-5p, miR-3120-3p, miR-126b-5p, miR-29a-3p, miR-144-5p, miR-203-3p, miR-1185-2-3p, miR-376b-5p, miR-148a-3p, miR-3591-3p, miR-19a-3p, miR-9-3p, miR-17-3p, miR-29c-3p, miR-452-5p, miR-1193, miR-1285-5p, miR-301b-3p, novel_82, miR-30b-5p, miR-6402, miR-28c, miR-2285y, miR-301a-5p, miR-382-5p, miR-29a, miR-2285t, miR-2284q, miR-30c-2-3p, miR-664-3p, miR-200c, miR-8117, miR-6119-5p, miR-107, miR-450a-2-3p, miR-17-3p, miR-466i-5p, miR-200c-3p, miR-3064-5p, miR-329a-5p, miR-199a-5p, miR-664-5p, miR-200b-3p, miR-429-3p, miR-199a-3p, miR-129-1-3p, miR-23b-3p, miR-322-5p, miR-7859, miR-200b, miR-15a-5p, miR-23c, miR-151-3p, miR-664a-5p, miR-665, miR-424-5p, miR-592, miR-130b-5p, novel_74, miR-17-3p, miR-16-5p, miR-129-2-3p, miR-1197-3p, miR-23b, miR-3154, novel_99, miR-186-5p, miR-2285aa, miR-30c-1-3p, miR-199a-5p, miR-154b-5p, miR-15b-5p, miR-139-5p, miR-2957, miR-16b, miR-199b-5p, miR-3085-3p, miR-23a-3p, miR-652-5p, miR-130b-5p, miR-424-5p, miR-6240, miR-30c-1-3p, miR-145a-5p, novel_23, miR-101c, miR-2284x, miR-16b, miR-145b, miR-199b-3p, miR-151a-3p, miR-103a-3p, miR-103, miR-16a, miR-15a, miR-218-5p, miR-101-3p, miR-147-5p, miR-199c, miR-335, miR-17-3p, miR-3059-5p, miR-335-5p, miR-199b-5p, miR-361-3p, miR-361-3p, miR-199b-5p, miR-195a-5p, miR-107, miR-541-5p, miR-139-5p, miR-3064-5p, miR-664b</p> |
| MCFD2  | ENSOARGO(multiple | <p>miR-2411-5p, miR-1307-3p, miR-2411, miR-744-5p, miR-183-5p</p>                                                                                                                                                                                                                                                                                                                                                                                                                                                                                                                                                                                                                                                                                                                                                                                                                                                                                                                                                                                                                                                                                                                                                                                                                                                                                                                                                                                                                                                                                                                                                                                                                                                                                                                                                                                                                                                                                                                                                                                                                                                                                                                                                                                                                                                                                                                                                                                                                           |
| DLGAP2 | ENSOARGO(discs, l | <p>miR-2411-5p, miR-1307-3p, miR-2411, miR-744-5p, miR-183-5p</p>                                                                                                                                                                                                                                                                                                                                                                                                                                                                                                                                                                                                                                                                                                                                                                                                                                                                                                                                                                                                                                                                                                                                                                                                                                                                                                                                                                                                                                                                                                                                                                                                                                                                                                                                                                                                                                                                                                                                                                                                                                                                                                                                                                                                                                                                                                                                                                                                                           |

miR-212-3p, miR-335-5p, miR-219b-3p, miR-194b-5p, miR-1839-3p, miR-2285f, miR-2428, miR-423-5p, novel\_82, miR-107-5p, miR-335, miR-4726-5p, miR-452-3p, miR-3064-5p, novel\_69, miR-670-3p, miR-146b-3p, miR-144-5p, miR-2285ab, miR-361-3p, miR-129b-5p, miR-6395, miR-127-3p, miR-1839-3p, miR-8485, miR-4532, miR-194a, miR-25-5p, miR-3085-3p, miR-103a-2-5p, miR-381-5p, miR-1343-5p, miR-409b, novel\_78, novel\_4, miR-2300a-5p, miR-185-5p, miR-2285g, miR-2285e, miR-149-5p, miR-1285, miR-484, miR-296-5p, miR-194-5p, miR-381-5p, miR-2889, miR-3074-2-3p, miR-144-5p, miR-1197-3p, miR-346, miR-3184-5p, miR-2433, miR-551b-3p, miR-19b-1-5p, miR-664a, novel\_74, miR-486b-3p, miR-874-5p, miR-4492, miR-3432a, miR-129-5p, miR-2331-3p, miR-215-5p, miR-370-3p, miR-2355-5p, miR-192-5p, miR-154b-5p, miR-2285c, miR-2312, miR-2474, miR-485-5p, miR-1827, miR-1895, miR-4286, miR-3064-5p, miR-486-3p, miR-210-5p, miR-185-3p, miR-324-3p, miR-2898, miR-450a-2-3p, miR-3600, miR-24-2-5p, miR-328-3p, miR-215-5p, novel\_133, miR-5703, miR-1343-5p, miR-378d, miR-1814c, novel\_48, miR-17-5p, miR-199a-5p, miR-769, miR-365a-3p, miR-615-5p, miR-370-3p, miR-487a-3p, miR-204-5p, miR-374b-3p, miR-767-5p, miR-370-5p, miR-135a-1-3p, miR-374a-3p, miR-93, miR-3607-3p, miR-10a-5p, miR-105-2, miR-411-3p, miR-134, miR-345-3p, miR-545-5p, miR-222, miR-181b-5p, miR-339a, miR-1271-3p, miR-490-3p, miR-2284a, miR-1957a, miR-199a-5p, miR-3065-3p, miR-181a-2-3p, miR-1, miR-2385-3p, miR-29b-2-5p, miR-6395, miR-1291, miR-670-3p, miR-10a-5p, miR-378b, miR-656-5p, miR-20a-5p, miR-326-3p, miR-211, miR-2285x, miR-1193, miR-135a-2-3p, miR-30b-3p, miR-145a-5p, miR-374b-3p, miR-181a-5p, miR-1285, miR-20b, miR-544b, miR-377-5p, miR-125a-5p, miR-1343-5p, miR-106a-5p, miR-17-5p, miR-190a, miR-330-3p, miR-130b-5p, let-7g-3p, miR-21a-3p, miR-544-3p, miR-532-5p, miR-182-5p, miR-370-5p, miR-3065-3p, miR-545-3p, miR-487a-5p, miR-208b-5p, miR-664a, miR-29b-2-5p, miR-19b-1-5p, miR-222-3p, miR-6134, miR-206-3p, miR-10b-5p, miR-378d, miR-362-3p, novel\_83, miR-151-5p, miR-383-5p, miR-505-3p, miR-3600, miR-299-3p, miR-106a, miR-125b, miR-146a-5p, miR-2432, miR-130a-5p, miR-29b-1-5p, miR-20a, miR-199b-5p, miR-7857-3p, miR-499b-5p, miR-2285t, miR-374a-3p, miR-4726-5p, miR-371a-5p, miR-769-5p, miR-181d-5p, miR-452-5p, miR-541-3p, miR-212-3p, novel\_60, miR-3059-5p, miR-3120-5p, miR-544a, miR-30b-3p, miR-3962, miR-412-3p, miR-10b, miR-484, miR-221-3p, miR-9788-3p, miR-105-1, miR-3955-3p, miR-362-3p, novel\_103, miR-1306-5p, miR-326, miR-491-3p, miR-193a, miR-376b, let-7c-3p, miR-106a-5p, miR-20b-5p, miR-329a, miR-767, miR-23b, miR-93-5p, miR-223-5p, miR-1271, miR-125a, miR-2285aa, miR-2355-5p, miR-874-3p, miR-503-3p, miR-134-5p, miR-592, miR-125b-5p, miR-23b-5p, miR-330-5p, miR-1343-5p, miR-129-1-3p, miR-134-5p, miR-505-5p, miR-9-5p, miR-131, novel\_70, miR-112, miR-200a-3p, miR-197-5p, miR-6536, miR-

USP5

ENSOARGO(ubiquiti

MEST

ENSOARGO(mesoderm



miR-338-3p, miR-6134, miR-1271, miR-4510, miR-208b-5p, miR-487a-5p, miR-424-5p, miR-6516-3p, miR-22-3p, miR-139-5p, miR-6130, miR-193b-3p, miR-27a-5p, miR-182-5p, miR-21-3p, novel\_99, miR-2312, miR-27b-5p, miR-2411, miR-125b-2-3p, miR-183-5p, miR-21-3p, miR-34b-5p, miR-2284m, miR-532-3p, miR-15a-5p, miR-340-5p, miR-200b, miR-383-5p, miR-548e-3p, miR-19b-3p, miR-188-3p, miR-124-3p, miR-2904, miR-2300b-3p, novel\_133, miR-8095, miR-181d-5p, miR-2285f, novel\_60, miR-2285t, miR-107-5p, miR-489, miR-499b-5p, miR-541-5p, miR-664b, miR-652-5p, miR-376b, miR-424-5p, miR-2285o, miR-1306-5p, miR-2285e, miR-9788-3p, novel\_4, miR-16-2-3p, miR-2284aa, miR-30b-3p, miR-125b-2-3p, miR-7857, miR-143-5p, miR-4791, miR-145-3p, miR-323-3p, miR-3607-3p, miR-1306-5p, miR-135a-5p, miR-144, miR-5100, miR-1-5p, miR-34c-3p, miR-2284n, miR-154b-5p, miR-3965, miR-34c-5p, miR-141-3p, miR-671-5p, miR-23a-5p, novel\_48, miR-488-3p, miR-381-3p, miR-2284a, miR-28b, miR-30a-3p, miR-107, miR-200c-3p, miR-181b-5p, miR-2898, miR-339a, miR-200c, miR-2285af, miR-582-3p, miR-545-5p, miR-1271-5p, miR-2411-5p, miR-24-2-5p, miR-200b-3p, miR-300, miR-134, miR-345-3p, miR-449a, miR-3959-3p, miR-211, miR-495-3p, novel\_101, miR-2285x, miR-136-3p, novel\_120, novel\_1, miR-33a-3p, miR-34c, miR-16a, miR-133a-5p, miR-15a, miR-502-5p, miR-34b, miR-195a-5p, miR-135b-5p, miR-7975, miR-19a-3p, miR-107, miR-1291, miR-18a-3p, miR-21c, miR-2387, miR-2285ab, miR-2483-5p, miR-190a, miR-103, miR-185-5p, miR-2285g, miR-2284d, miR-26b-3p, miR-130a-3p, miR-133b-5p, miR-7862, miR-30b-3p, miR-21-5p, miR-145a-5p, miR-3071-5p, miR-181a-5p, miR-653, miR-181c-5p, miR-214, miR-3958-5p, miR-454-3p, miR-129-5p, miR-190a-5p, miR-665, miR-30a-3p, miR-30e-3p, miR-2285j, miR-15b-5p, miR-301a-3p, miR-552-3p, miR-548c-3p, miR-1827, miR-543-3p, miR-625-5p, miR-

miR-322-5p, miR-24-2-5p, miR-378h, miR-6517, miR-7641, miR-412, miR-155-5p, miR-28b, miR-148b-5p, miR-3065-3p, miR-2284y, miR-29a-5p, miR-2284a, miR-17-3p, novel\_127, novel\_96, miR-2285af, miR-205-5p, miR-6119-5p, miR-219-3p, miR-133c, miR-874-3p, miR-329a, miR-23a-5p, miR-1248, miR-485-5p, miR-320a, miR-378c, miR-374b, miR-16-5p, miR-144-5p, miR-486b-3p, miR-28-5p, miR-331-3p, miR-409-3p, miR-134-3p, miR-149-5p, miR-133b-5p, miR-377-5p, miR-26b-3p, miR-16b, miR-30b-3p, miR-2284ab, miR-497-5p, miR-27b-3p, miR-2113, miR-22-3p, miR-654-3p, miR-432-3p, let-7j, miR-6240, miR-124-5p, miR-452-5p, miR-660, miR-193a-3p, miR-377-3p, miR-330-3p, miR-411b-3p, miR-320c, miR-3074-5p, miR-378b, miR-320b, miR-450b-3p, miR-6395, miR-378f, miR-195a-5p, miR-3970, miR-1306, miR-18a-3p, miR-374c-5p, miR-342-3p, miR-193b-3p, miR-17-3p, novel\_1, miR-199c, miR-4324, miR-ARHGEF37 ENSOARGO(Rho guan 15a, miR-576-3p, miR-28c, miR-16a, miR-425-5p, miR-15a-5p, miR-2284h-5p, miR-532-3p, miR-328-3p, miR-18a-3p, miR-3600, miR-4429, miR-218-1-3p, miR-378i, miR-362-3p, miR-2366, miR-140-3p, miR-378a-3p, miR-377-5p, miR-486-3p, miR-183-5p, miR-2285w, miR-369-3p, miR-320d, miR-2484, miR-21-3p, novel\_17, miR-324-3p, miR-92a-1-5p, miR-422a, miR-27a-5p, miR-377-3p, miR-582-5p, miR-193b-3p, miR-139-5p, miR-204-3p, miR-22-3p, miR-15b-5p, miR-155-5p, miR-378a-3p, miR-660-5p, miR-3065-3p, miR-216b-3p, let-7g-3p, miR-582-5p, miR-129b-3p, miR-655, miR-378c, miR-539-5p, miR-3074-5p, miR-155-5p, miR-6516-3p, miR-664a, miR-17-3p, miR-708-5p, miR-424-5p, miR-2285j, miR-324-3p, miR-219b-3p, miR-655-3p, miR-216a-3p, novel\_4, miR-199b-3p, miR-330-3p, miR-1343-3p, miR-2300a-5p, miR-27a-3p, miR-378c, miR-362-3p, miR-2426, miR-101a-5p, miR-3120-5p, miR-6529a, miR-378b, miR-329-3p, miR-412-3p, miR-758-3p, miR-30b-3p, miR-378d, miR-3187-3p, miR-758-miR-181a-2-3p, miR-195a-3p, miR-30a-3p, miR-130a-5p, miR-380-3p, miR-125a-3p, miR-200c, novel\_17, miR-1260a, miR-205-5p, miR-217, miR-30f, miR-200c-3p, miR-202-5p, miR-543-5p, miR-429-3p, miR-30d-3p, miR-7641, miR-200b, miR-302a-5p, miR-199a-3p, miR-1197-5p, miR-23b-5p, miR-217-5p, miR-1343-5p, miR-582-3p, miR-200b-3p, miR-664-5p, miR-3074-5p, miR-2330-3p, miR-214, miR-1260b, miR-338-3p, miR-145-3p, miR-3184-5p, miR-30e-3p, miR-135a-5p, miR-30a-3p, miR-130b-5p, miR-660-5p, miR-140-5p, miR-21-3p, miR-499b-3p, miR-377-3p, miR-137-3p, miR-345-5p, miR-345-5p, miR-130b-5p, miR-345-5p, miR-1306-5p, miR-377-3p, miR-199a-3p, miR-2285l, miR-214-3p, miR-452-5p, miR-660, miR-1343-5p, novel\_4, miR-31-5p, miR-145b, miR-222-5p, miR-26b-3p, miR-665, miR-432-5p, miR-455-3p, miR-1434-3p, miR-541, miR-6529a, miR-432, miR-873a-5p, miR-145a-5p, miR-1260b, miR-380-3p, miR-3120-5p, miR-188-5p, miR-541-3p, miR-3956-3p, novel\_60, miR-3059-5p, miR-2285x, miR-2284w, miR-423-5p, miR-101-3p, miR-3958-3p, miR-452-3p, miR-20a-3p, miR-3074-5p, miR-499a-3p, miR-140-5p, miR-376b-5p, miR-3591-3p, miR-1306, miR-150-5p, miR-136-5p, miR-135b-5p

|       |                     |                                                                                                                                                                                                                                                                                                                                                                                                                                                                                                                                                                                                                                                                                                                                                                                                                                                                                                                                                                                                                                                                                                                                                                                                                                                                                                                                                                                                                                                                                                                                                                                                                                                                                                                                                                                                                                                                                                                                                                                                                                                                                                                                                                                                                                                                                                                                                                                                                                                                                                                                                                                                                                                                                                                                                                                                                                                                                                                                                                                                                              |
|-------|---------------------|------------------------------------------------------------------------------------------------------------------------------------------------------------------------------------------------------------------------------------------------------------------------------------------------------------------------------------------------------------------------------------------------------------------------------------------------------------------------------------------------------------------------------------------------------------------------------------------------------------------------------------------------------------------------------------------------------------------------------------------------------------------------------------------------------------------------------------------------------------------------------------------------------------------------------------------------------------------------------------------------------------------------------------------------------------------------------------------------------------------------------------------------------------------------------------------------------------------------------------------------------------------------------------------------------------------------------------------------------------------------------------------------------------------------------------------------------------------------------------------------------------------------------------------------------------------------------------------------------------------------------------------------------------------------------------------------------------------------------------------------------------------------------------------------------------------------------------------------------------------------------------------------------------------------------------------------------------------------------------------------------------------------------------------------------------------------------------------------------------------------------------------------------------------------------------------------------------------------------------------------------------------------------------------------------------------------------------------------------------------------------------------------------------------------------------------------------------------------------------------------------------------------------------------------------------------------------------------------------------------------------------------------------------------------------------------------------------------------------------------------------------------------------------------------------------------------------------------------------------------------------------------------------------------------------------------------------------------------------------------------------------------------------|
| PKN1  | ENSOARGO( protein   | <p>miR-1260a, novel_127, miR-181a-2-3p, miR-3064-5p, miR-28b, miR-3065-3p, novel_39, miR-1343-5p, miR-128-3p, miR-423-3p, miR-299a-3p, miR-483-3p, miR-2411-5p, miR-370-5p, miR-1306-3p, miR-125b-5p, miR-331-3p, miR-138-5p, miR-486b-3p, novel_42, miR-1306-5p, miR-1260b, miR-10b-3p, miR-671-5p, miR-23a-5p, miR-125a, miR-1271, miR-542-5p, miR-370-3p, miR-34c-5p, miR-3141, miR-483-3p, miR-1343-5p, miR-125a-5p, miR-130b-5p, miR-432-3p, miR-197-3p, miR-1260b, miR-30b-3p, miR-138, miR-188-5p, miR-7862, miR-134-3p, miR-149-5p, miR-28c, miR-1247-3p, miR-34c, miR-136-3p, miR-342-3p, miR-1193, novel_101, miR-3957-3p, miR-24-3p, miR-449a, miR-3141, miR-2285ab, miR-216a-3p, miR-18a-3p, miR-1306, miR-1291, miR-450b-3p, miR-6395, miR-9851-3p, miR-3074-5p, miR-320b, miR-299b-3p, miR-34b, miR-2404, miR-125b, miR-324-3p, miR-760-3p, miR-299-3p, miR-34b-5p, miR-2887, miR-130a-5p, miR-376a-5p, miR-2411, miR-486-3p, miR-1197-5p, miR-33b-3p, miR-34a-5p, miR-18a-3p, miR-212-5p, miR-3600, miR-222-5p, miR-328-3p, miR-199a-3p, miR-532-3p, miR-665, miR-132-5p, miR-664a, miR-130b-5p, miR-4492, miR-129-5p, miR-145a-3p, miR-3074-5p, miR-129b-3p, miR-2312, miR-2331-3p, miR-532-5p, miR-370-5p, miR-3065-3p, miR-204-3p, novel_32, miR-5126, miR-1306-5p, miR-199a-3p, miR-342, miR-3085-3p, novel_124, miR-153-3p, miR-127-3p, miR-301b-5p, miR-541, miR-143-5p, miR-484, miR-30b-3p, miR-3120-5p, novel_4, miR-1343-3p, miR-153, miR-421, miR-216a-3p, miR-301a-5p, miR-499a-5p, miR-4726-5p, miR-490-5p, miR-541-3p, miR-2447, miR-3059-5p, let-7i-3p, miR-2285f, miR-6527, miR-877-3p, miR-361-3p, miR-1306-3p, miR-129b-5p, miR-668-5p, novel_94, miR-493-5p, miR-3064-5p, miR-7977, miR-489, miR-378g</p> <p>miR-9-5p, miR-299a-3p, miR-34a-5p, miR-378d, miR-218-1-3p, miR-1197-5p, miR-5703, miR-2904, miR-1343-5p, miR-2366, miR-362-3p, miR-2300b-3p, novel_133, miR-200a, miR-486-3p, novel_39, miR-377-5p, miR-28b, miR-183-5p, miR-200a-3p, miR-299-3p, miR-21-3p, miR-34b-5p, miR-466i-5p, miR-202-5p, miR-22-3p, novel_32, miR-323-5p, miR-6130, miR-34c-5p, miR-2284s, miR-182-5p, miR-141-3p, miR-370-3p, miR-574-5p, miR-2331-3p, miR-1248, miR-485-5p, miR-329a, miR-3154, miR-21a-3p, miR-122-5p, miR-6525, miR-214, miR-4510, miR-28-5p, miR-486b-3p, miR-592, miR-130b-5p, miR-874-5p, miR-708-5p, miR-664a, novel_74, miR-138-5p, miR-665, miR-6740-5p, miR-410-5p, miR-149-5p, miR-194-3p, miR-412-5p, miR-377-5p, novel_4, miR-3120-5p, miR-101a-5p, miR-362-3p, miR-138, miR-22-3p, miR-1843b-5p, miR-1434-3p, miR-2113, miR-329-3p, miR-2284r, miR-101-5p, miR-382-3p, miR-1388-3p, miR-130b-5p, miR-103a-2-5p, miR-214-3p, miR-1343-5p, novel_51, miR-182-5p, miR-362-3p, miR-3141, miR-4443, miR-669, miR-34b, miR-299b-3p, miR-323a-5p, miR-655-5p, miR-320b, miR-20a-3p, miR-1983, miR-412-3p, miR-3141, miR-361-3p, miR-154a, miR-2428, novel_27, miR-449a, miR-1285-5p, miR-9-5p, miR-452-5p, miR-2285t, miR-107-5p, miR-34c, miR-28c, miR-4324, miR-218-5p</p> |
| DDX41 | ENSOARGO( DEAD (As: |                                                                                                                                                                                                                                                                                                                                                                                                                                                                                                                                                                                                                                                                                                                                                                                                                                                                                                                                                                                                                                                                                                                                                                                                                                                                                                                                                                                                                                                                                                                                                                                                                                                                                                                                                                                                                                                                                                                                                                                                                                                                                                                                                                                                                                                                                                                                                                                                                                                                                                                                                                                                                                                                                                                                                                                                                                                                                                                                                                                                                              |

|          |                   |                                                                                                                                                                                                                                                                                                                                                                                                                                                                                                                                                                                                                                                                                                                                                                                                                                                                                                                                                                                                                                                                                                                                                                                                                                                                                                                        |
|----------|-------------------|------------------------------------------------------------------------------------------------------------------------------------------------------------------------------------------------------------------------------------------------------------------------------------------------------------------------------------------------------------------------------------------------------------------------------------------------------------------------------------------------------------------------------------------------------------------------------------------------------------------------------------------------------------------------------------------------------------------------------------------------------------------------------------------------------------------------------------------------------------------------------------------------------------------------------------------------------------------------------------------------------------------------------------------------------------------------------------------------------------------------------------------------------------------------------------------------------------------------------------------------------------------------------------------------------------------------|
| ZNF532   | ENSOARGO(zinc fin | miR-216b-3p, miR-214, novel_68, miR-340-3p, miR-363, miR-149-5p, miR-30b-3p, miR-2331-5p, miR-2113, miR-3432a, miR-744-5p, miR-214-3p, miR-30b-3p                                                                                                                                                                                                                                                                                                                                                                                                                                                                                                                                                                                                                                                                                                                                                                                                                                                                                                                                                                                                                                                                                                                                                                      |
| MGLL     | ENSOARGO(monoglyc | miR-216a-3p, miR-18a-3p, miR-3059-5p, miR-370-3p, miR-628-5p, miR-1271, miR-466i-5p, miR-23a-5p, novel_127, miR-1197-5p, miR-23b-5p, miR-18a-3p<br>miR-3074-5p, let-7b, miR-378c, miR-42b-5p, miR-10b-5p, let-7b-5p, let-7f, miR-338-5p, miR-29b-2-5p, miR-665, miR-320e, miR-1843b-3p, miR-669a-3p, miR-190a-5p, miR-378a-3p, miR-140-5p, miR-296-3p, miR-3065-3p, miR-216b-3p, miR-139-5p, miR-216b-5p, miR-10a, miR-877-5p, let-7i-5p, miR-204-3p, miR-21a-3p, miR-30f, miR-2285w, miR-125b-2-3p, miR-146a-5p, miR-422a, miR-219b-5p, miR-216a-5p, miR-466i-5p, miR-98-5p, let-7k, miR-30b-3p, miR-23c, miR-200b, miR-23b-3p, miR-7859, miR-2284h-5p, miR-532-3p, miR-2408, miR-1961, novel_133, miR-378i, miR-378a-3p, miR-1197-5p, miR-217-5p, miR-5703, miR-2904, miR-124-3p, novel_73, miR-16-1-3p, miR-218-1-3p, miR-541-3p, miR-2447, miR-9-5p, miR-452-5p, miR-8095, miR-1285-5p, novel_82, miR-2284q, miR-20a-3p, miR-452-3p, miR-3064-5p, miR-139-5p, miR-211-5p, miR-541-5p, miR-489, miR-3082-5p, miR-2483-3p, miR-378g, miR-378e, miR-203-3p, let-7d-                                                                                                                                                                                                                                                   |
| MARVELD2 | ENSOARGO(MARVEL d | 5p, miR-140-5p, miR-668-5p, miR-1983, miR-1839-3p, miR-124a, let-7a-5p, miR-33a-5p, miR-23a-3p, miR-378d, miR-8485, miR-326, miR-342, miR-323b-3p, miR-3085-3p, let-7e, miR-146b, miR-330-3p, miR-145b, miR-539-5p, miR-455-3p, miR-216a-3p, miR-10b, miR-143-5p, miR-1298-5p, miR-541, miR-378b, miR-3962, miR-125b-2-3p, miR-323b, miR-450b-5p, miR-378c, miR-21b, miR-2284aa, miR-101c, miR-193a-5p, miR-1197-3p, miR-1260b, miR-323-3p, miR-378c, miR-135a-1-3p, miR-29b-3p, miR-1-5p, miR-3969, miR-100-3p, miR-138-5p, miR-204-5p, miR-410-3p, miR-31-3p, miR-574-5p, miR-370-3p, miR-23b, let-7g-3p, miR-329b, miR-10b-3p, miR-29b-2-5p, miR-3064-5p, miR-2478, let-7g, miR-3065-3p, miR-1957a, miR-6119-5p, miR-200c, miR-205-5p, miR-2285af, miR-1260a, let-7c-5p, miR-217, miR-127-5p, miR-1a-2-5p, miR-200c-3p, let-7f-5p, miR-429-3p, miR-6517, miR-376a-5p, miR-1224-5p, miR-7641, miR-378h, miR-9-5p, miR-2284r, miR-545-5p, miR-2501-5p, miR-106a-5p, miR-22b-5p, miR-125a, miR-1b-3p, miR-2411-5p, miR-532-3p, miR-652-3p, miR-541, miR-2284r, miR-129b-5p, miR-1343-5p, miR-450b-5p, miR-125b-1-3p, miR-744-5p, miR-4508, miR-541-3p, miR-216c-5p, miR-676-3p, miR-2411, miR-6402, novel_17, miR-4324, novel_51, miR-125b, miR-125b-5p, miR-191-3p, miR-1343-5p, miR-452-5p, miR-208b-5p, miR-125a-5p |
| KIF22    | ENSOARGO(kinesin  |                                                                                                                                                                                                                                                                                                                                                                                                                                                                                                                                                                                                                                                                                                                                                                                                                                                                                                                                                                                                                                                                                                                                                                                                                                                                                                                        |
| DPP3     | ENSOARGO(dipeptid | novel_4, miR-320b, miR-2459, novel_32                                                                                                                                                                                                                                                                                                                                                                                                                                                                                                                                                                                                                                                                                                                                                                                                                                                                                                                                                                                                                                                                                                                                                                                                                                                                                  |

miR-2904, miR-188-3p, miR-1197-5p, novel\_133, miR-2284u, miR-148a-5p, miR-33b-3p, miR-184-3p, miR-19b-3p, miR-505-3p, miR-2284h-5p, miR-328-3p, miR-324-3p, miR-185-3p, miR-92a-1-5p, miR-2285p, miR-618, miR-2284m, miR-466i-5p, miR-369-3p, miR-2285w, miR-2432, miR-146a-5p, miR-486-3p, miR-29b-1-5p, miR-376a-5p, miR-377-5p, miR-130a-5p, miR-655, miR-625-5p, miR-339b, miR-18a-5p, miR-552-3p, miR-296-3p, miR-182-5p, miR-140-5p, miR-30c-1-3p, miR-504-5p, miR-545-3p, miR-660-5p, miR-27a-5p, miR-10a, miR-324-3p, miR-219b-3p, miR-655-3p, miR-665, miR-874-5p, miR-4492, miR-669a-3p, miR-130b-5p, miR-3074-2-3p, miR-539-5p, miR-3184-5p, miR-6134, miR-10b-5p, miR-758-3p, miR-10b, miR-101c, miR-330-3p, miR-455-3p, miR-9788-3p, miR-148b-5p, miR-421, miR-147a, miR-1298-3p, miR-29b-1-5p, miR-182-5p, miR-5126, novel\_103, miR-146b, miR-199b-5p, miR-103a-2-5p, miR-491-5p, miR-3085-3p, miR-2284b, miR-4532, miR-8485, miR-2310, miR-758-3p, miR-30c-1-3p, miR-361-3p, miR-199b-5p, miR-1983, miR-99b-5p, miR-504, miR-136-5p, miR-7977, miR-211-5p, miR-24-1-5p, miR-2284g, miR-3064-5p, miR-10b, miR-203-3p, miR-378g, miR-107-5p, miR-490-5p, miR-7134-3p, miR-2284q, miR-4726-5p, miR-335, miR-9-5p, miR-2284j, miR-3059-5p, novel\_60, miR-212-3p, miR-3956-3p, miR-885-5p, miR-423-5p, miR-1285-5p, miR-219a-2-3p, miR-361-3p, miR-877-3p, miR-1343-5p, miR-134, miR-99a-5p, miR-10a-5p, novel\_79, miR-7641, miR-18b-5p, miR-134-5p, miR-582-3p, novel\_121, miR-24-2-5p, miR-9-5p, miR-30c-2-3p, miR-339a, miR-99a, miR-125a-3p, miR-219-3p, miR-6119-5p, miR-543-5p, novel\_96, miR-2898, miR-3064-5p, miR-2284f, miR-4286, miR-199a-5p, miR-2284y, miR-376c-5p, miR-2284a, miR-148b-5p, miR-24-2-5p, miR-137-3p, miR-100-5p, miR-18a, miR-488-3p, miR-7144-5p, miR-1814c, miR-370-3p, miR-1271, miR-223-5p, miR-199a-5p, miR-2284n, miR-365a-3p, miR-144, miR-135a-5p, miR-

miR-1343-3p, miR-2300a-5p, miR-181b-2-3p, miR-1185-3p, miR-2459, miR-455-3p, miR-143-5p, miR-10b, miR-301b-5p, miR-2284r, miR-296-5p, miR-412-3p, miR-3187-3p, miR-326, miR-29b-1-5p, miR-2957, miR-487b-5p, miR-146b, miR-10b, miR-211-5p, miR-499b-5p, miR-499a-3p, miR-1185-2-3p, miR-652-3p, miR-409-5p, miR-140-5p, miR-361-3p, miR-504, novel\_94, miR-544-5p, miR-2447, miR-32-3p, miR-361-3p, miR-154a, miR-615, miR-301a-5p, miR-371a-5p, miR-2285y, miR-548e-3p, miR-212-5p, miR-7859, miR-532-3p, miR-2300b-3p, miR-188-3p, miR-217-5p, miR-2904, miR-33b-3p, miR-378d, miR-133a-3p, miR-329a-5p, miR-345-3p, miR-181b-1-3p, miR-29b-1-5p, miR-143-3p, miR-486-3p, miR-146a-5p, miR-345-3p, miR-324-3p, miR-216a-5p, miR-202-5p, miR-660-5p, miR-32-3p, miR-2331-3p, miR-504-5p, miR-296-3p, miR-6130, miR-499b-3p, miR-10a, novel\_25, novel\_32, miR-204-3p, miR-22-3p, miR-345-5p, miR-339b, miR-625-5p, miR-885-3p, miR-145a-3p, miR-4510, miR-346, miR-10b-5p, miR-338-3p, miR-6134, miR-3604, miR-320e, miR-664a, miR-487b-5p, miR-1843b-3p, miR-130b-5p, miR-874-5p, miR-4492, miR-133b-5p, miR-187-3p, miR-339-5p, miR-487b-3p, miR-185-5p, miR-2355-3p, miR-149-5p, novel\_116, miR-873a-5p, miR-22-3p, miR-29b, miR-744-5p, miR-2889, miR-130b-5p, miR-432-3p, miR-345-5p, miR-296-3p, miR-296-3p, miR-146a, miR-2411-3p, novel\_51, miR-378a-5p, miR-660, miR-329-5p, miR-10a-5p, miR-670-3p, miR-29a-3p, miR-2404, miR-181b-3p, miR-677, miR-450b-3p, miR-146b-5p, miR-29c-3p, miR-24-3p, miR-211, miR-2428, miR-326-3p, miR-28c, novel\_87, novel\_1, miR-29a, miR-6119-3p, miR-6123, miR-22-5p, miR-2285ad, miR-412, novel\_79, miR-505-5p, miR-214-5p, miR-582-3p, miR-134-5p, miR-134, miR-345-3p, miR-615-3p, miR-330-5p, miR-29d-3p, miR-885-3p, miR-10a-5p, miR-28b, miR-2285b, miR-1271-3p, miR-6119-5p, miR-125a-3p, miR-217, miR-339a, miR-200a-3p, miR-141-3p, miR-2355-5p, miR-370-3p, miR-

|        |                     |                                                                                                                                                                                                                                                                                                                                                                                                                                                                                                                                                                                                                                                                                                                                                                                                                                                                                                                                                                                                                                                                                                                                                                                                                                                                                                                                                                                                                                                                                                                                                                                                                                                                                                                                    |
|--------|---------------------|------------------------------------------------------------------------------------------------------------------------------------------------------------------------------------------------------------------------------------------------------------------------------------------------------------------------------------------------------------------------------------------------------------------------------------------------------------------------------------------------------------------------------------------------------------------------------------------------------------------------------------------------------------------------------------------------------------------------------------------------------------------------------------------------------------------------------------------------------------------------------------------------------------------------------------------------------------------------------------------------------------------------------------------------------------------------------------------------------------------------------------------------------------------------------------------------------------------------------------------------------------------------------------------------------------------------------------------------------------------------------------------------------------------------------------------------------------------------------------------------------------------------------------------------------------------------------------------------------------------------------------------------------------------------------------------------------------------------------------|
|        |                     | miR-378g, let-7d-5p, miR-4443, miR-1983, miR-361-3p, miR-409-5p, miR-361-3p, miR-877-3p, miR-423-5p, miR-3059-5p, miR-9-5p, miR-2284j, miR-2285n, miR-2285y, miR-107-5p, miR-153, miR-455-3p, miR-421, novel_4, miR-2300a-5p, miR-1343-3p, miR-409b, miR-145b, miR-2284aa, miR-1839-5p, miR-16-2-3p, miR-2284r, miR-8485, let-7a-5p, miR-574-3p, miR-2330-5p, miR-25-5p, miR-487b-5p, miR-153-3p, miR-214-3p, let-7e, miR-103a-2-5p, miR-199a-3p, miR-1306-5p, miR-29b-1-5p, novel_19, let-7i-5p, miR-221-5p, miR-548o-3p, miR-532-5p, miR-625-5p, miR-885-3p, miR-1895, miR-1827, miR-3184-5p, let-7b-5p, let-7b, miR-129-2-3p, miR-214, miR-3074-2-3p, miR-874-5p, miR-4492, let-7f, miR-132-5p, miR-340-5p, miR-532-3p, miR-199a-3p, miR-616-3p, miR-328-3p, miR-3600, miR-212-5p, miR-378d, novel_133, miR-193b-5p, miR-1961, miR-188-3p, miR-1197-5p, miR-5703, miR-29b-1-5p, miR-345-3p, miR-760-3p, miR-98-5p, miR-221-5p, let-7k, miR-210-5p, miR-185-3p, miR-92a-1-5p, miR-670-3p, miR-6535, novel_68, miR-412-3p, let-7e-5p, miR-6395, miR-1306, miR-24-3p, miR-2428, miR-136-3p, miR-128-1-5p, miR-147-5p, miR-28c, miR-576-3p, let-7i, miR-2284d, miR-412-5p, miR-134-3p, miR-3431, let-7g-5p, miR-665, miR-4508, miR-188-5p, miR-708-3p, miR-653, miR-2113, novel_23, miR-145a-5p, miR-432-3p, miR-483-3p, miR-378a-5p, miR-466f-3p, miR-197-5p, miR-136-3p, novel_51, miR-324-5p, miR-133c, miR-874-3p, miR-615-5p, miR-1271, miR-23a-5p, miR-671-5p, miR-1197-3p, miR-145-3p, miR-1306-5p, miR-2284k, miR-26c, miR-9-5p, miR-483-3p, miR-2284z, miR-129-1-3p, miR-2285ad, miR-6517, miR-885-3p, let-7d, miR-23b-5p, miR-28b, miR-148b-5p, miR-2478, let-7g, novel_39, let-7f-5p, miR-205-5p, miR-125a-3p, let-7c-5p |
| TRAF1  | ENSOARGO(C TNF rece |                                                                                                                                                                                                                                                                                                                                                                                                                                                                                                                                                                                                                                                                                                                                                                                                                                                                                                                                                                                                                                                                                                                                                                                                                                                                                                                                                                                                                                                                                                                                                                                                                                                                                                                                    |
| PLSCR4 | ENSOARGO(C phosphol | miR-335-5p, miR-335<br>miR-371b-3p, miR-361-3p, miR-2447, novel_101, miR-495-3p, miR-450a-5p, miR-4726-5p, miR-628-3p, miR-15a, miR-769-5p, miR-2285y, miR-16a, novel_69, miR-499a-3p, miR-652-3p, miR-4792, miR-7977, miR-195a-5p, miR-361-3p, miR-18a-3p, miR-150-5p, let-7j, miR-424-5p, miR-25-5p, miR-214-3p, miR-125a-5p, miR-377-3p, miR-16b, miR-185-5p, miR-187-3p, miR-450b-5p, miR-16b, miR-497-5p, miR-873a-5p, miR-484, miR-769-5p, novel_42, miR-214, miR-16-5p, miR-424-5p, miR-665, miR-125b-5p, miR-769, miR-377-3p, miR-499b-3p, miR-15b-5p, miR-204-3p, miR-874-3p, miR-221-5p, miR-125a, miR-552-3p, miR-3065-3p, miR-370-3p, miR-1895, miR-301, miR-130a-5p, miR-143-3p, miR-450c-5p, miR-3065-3p, miR-760-3p, novel_127, miR-221-5p, miR-125a-3p, miR-125b, miR-15a-5p, miR-322-5p, miR-2284h-5p, miR-18a-3p, miR-1224-5p<br>miR-885-5p, miR-424-5p, miR-16-5p, miR-877-3p, miR-28b, let-7j, miR-125a-3p, miR-28c, miR-15a, miR-16b, miR-16a, miR-424-5p, miR-107, miR-103a-3p, miR-18b-5p, miR-15a-5p, miR-7857-3p, miR-322-5p, miR-15b-5p, miR-103, miR-18b, miR-542-3p, miR-18a, miR-18a-5p, miR-107, miR-16b, miR-195a-5p, miR-497-5p                                                                                                                                                                                                                                                                                                                                                                                                                                                                                                                                                                    |
| PHF19  | ENSOARGO(C PHD fing |                                                                                                                                                                                                                                                                                                                                                                                                                                                                                                                                                                                                                                                                                                                                                                                                                                                                                                                                                                                                                                                                                                                                                                                                                                                                                                                                                                                                                                                                                                                                                                                                                                                                                                                                    |
| MIOS   | ENSOARGO(C missing  | miR-335, miR-582, miR-149-5p, miR-6535, miR-145-3p, miR-192-3p, miR-146b-3p, miR-432-3p, miR-335-5p                                                                                                                                                                                                                                                                                                                                                                                                                                                                                                                                                                                                                                                                                                                                                                                                                                                                                                                                                                                                                                                                                                                                                                                                                                                                                                                                                                                                                                                                                                                                                                                                                                |
| KAT7   | ENSOARGO(C K(lysine |                                                                                                                                                                                                                                                                                                                                                                                                                                                                                                                                                                                                                                                                                                                                                                                                                                                                                                                                                                                                                                                                                                                                                                                                                                                                                                                                                                                                                                                                                                                                                                                                                                                                                                                                    |

|       |                    |                                                                                                                                                                                                                                                                                                                                                                                                                                                                                                                                                                                                                                                                                                                                                                                                                                                                                                                                                                                                                                                                                                                                                                                                                                                                                                                                                                                                                                                                                                                                                                                                 |
|-------|--------------------|-------------------------------------------------------------------------------------------------------------------------------------------------------------------------------------------------------------------------------------------------------------------------------------------------------------------------------------------------------------------------------------------------------------------------------------------------------------------------------------------------------------------------------------------------------------------------------------------------------------------------------------------------------------------------------------------------------------------------------------------------------------------------------------------------------------------------------------------------------------------------------------------------------------------------------------------------------------------------------------------------------------------------------------------------------------------------------------------------------------------------------------------------------------------------------------------------------------------------------------------------------------------------------------------------------------------------------------------------------------------------------------------------------------------------------------------------------------------------------------------------------------------------------------------------------------------------------------------------|
| PSMD5 | ENSOARGO( proteaso | miR-27b-5p, miR-129b-3p, miR-548o-3p, miR-452-3p, miR-1271, miR-299b-3p, miR-133c, miR-669, miR-2285j, miR-7134-3p, miR-2285t, miR-145a-3p, miR-539-5p, miR-346, miR-7705, miR-326-3p, miR-1290, miR-330-5p, miR-30b-3p, miR-30b-3p, miR-548e-3p, miR-299a-3p, miR-7859, miR-505-5p, miR-671-3p, miR-9788-3p, miR-326, miR-2285af, miR-29b-1-5p, miR-491-5p, miR-299-3p, novel_96, miR-494-3p, miR-29b-1-5p                                                                                                                                                                                                                                                                                                                                                                                                                                                                                                                                                                                                                                                                                                                                                                                                                                                                                                                                                                                                                                                                                                                                                                                     |
| PID1  | ENSOARGO( p53-indu | miR-148a-3p, miR-450b-3p, miR-147-3p, novel_99, novel_94, miR-125a, miR-34c-5p, miR-193b-3p, miR-34b, miR-4324, miR-125b-5p, miR-34c, miR-331-3p, miR-4726-5p, miR-7134-3p, miR-486b-3p, novel_42, miR-342-3p, miR-193b-3p, miR-449a, novel_133, miR-2366, miR-2904, miR-450b-5p, miR-2426, miR-34a-5p, miR-6517, miR-148b-3p, miR-2284h-5p, miR-342, novel_51, miR-125b, miR-34b-5p, miR-125a-5p, miR-193a-3p, miR-152-3p, miR-2285w, miR-486-3p, miR-4532                                                                                                                                                                                                                                                                                                                                                                                                                                                                                                                                                                                                                                                                                                                                                                                                                                                                                                                                                                                                                                                                                                                                     |
| PAQR6 | ENSOARGO( progesti | novel_39, miR-199a-5p, miR-3065-3p, miR-2285b, miR-3064-5p, miR-30a-3p, novel_96, miR-1260a, miR-505-5p, miR-378h, miR-885-3p, miR-29d-3p, miR-3578, miR-378c, miR-374a-3p, miR-1260b, miR-31-3p, miR-374b-3p, miR-486b-3p, miR-331-3p, miR-26c, miR-3969, miR-29b-3p, miR-199a-5p, miR-2285aa, miR-370-3p, miR-1271, miR-574-5p, miR-376c-5p, miR-7144-5p, miR-329a, miR-329b, miR-376c-5p, miR-628-5p, miR-130b-5p, miR-149-5p, miR-3535, miR-134-3p, miR-29b, miR-30b-3p, miR-381-5p, miR-1260b, miR-22-3p, novel_23, miR-199b-5p, miR-371b-3p, miR-24-3p, miR-29c-3p, miR-335-5p, miR-22-5p, miR-502b, miR-29a, miR-669, miR-146b-3p, miR-29a-3p, novel_68, miR-3074-5p, miR-329-5p, miR-378f, miR-1291, miR-1306, miR-376b-5p, miR-2387, miR-486-3p, miR-329a-5p, miR-466i-5p, miR-324-3p, miR-185-3p, miR-422a, miR-532-3p, miR-30d-3p, miR-142-3p, miR-33b-3p, miR-124-3p, miR-378a-3p, miR-378i, miR-362-3p, miR-122-5p, miR-6134, miR-425-5p, miR-378c, miR-4510, miR-3074-5p, miR-4492, miR-130b-5p, miR-324-3p, miR-30a-3p, miR-665, miR-30e-3p, miR-22-3p, miR-6130, miR-3065-3p, miR-2331-3p, miR-378a-3p, miR-885-3p, miR-758-3p, miR-378d, miR-124a, miR-1388-3p, miR-199b-5p, miR-381-5p, miR-491-5p, miR-3085-3p, miR-362-3p, novel_19, miR-1306-5p, miR-496-5p, miR-1343-3p, miR-2300a-5p, miR-362-3p, miR-378c, miR-450b-5p, miR-758-3p, miR-30b-3p, miR-378b, miR-329-3p, miR-296-5p, miR-484, miR-541, miR-4791, miR-361-3p, novel_60, miR-541-3p, miR-3956-3p, miR-374a-3p, miR-335, miR-4443, miR-378e, miR-378g, miR-7977, miR-3064-5p, novel_94, miR-3963, miR-199b-5p |



miR-363-5p, miR-382, miR-654-3p, miR-345-5p, miR-296-3p, miR-330-3p, miR-197-5p, miR-124-5p, miR-466f-3p, miR-26b-3p, miR-2284d, miR-194-5p, miR-3071-5p, miR-380-3p, miR-1193, miR-17-3p, miR-2285x, miR-24-3p, novel\_27, miR-326-3p, miR-6402, miR-502-5p, miR-382-5p, novel\_1, miR-147-5p, miR-203b-5p, miR-670-3p, miR-3529-3p, miR-181a-2-3p, miR-29b-2-5p, miR-30a-3p, miR-1271-3p, miR-3065-3p, miR-200c, miR-2285af, miR-339a, miR-217, miR-30c-2-3p, miR-200c-3p, miR-17-3p, miR-222, miR-7641, miR-24-2-5p, miR-545-5p, miR-300, miR-128-3p, miR-105-2, miR-200b-3p, miR-374b, miR-133a-3p, miR-500b-5p, miR-370-5p, miR-5100, miR-2332, miR-1-5p, miR-409-3p, miR-3969, miR-144, miR-28-5p, miR-410-3p, miR-215-5p, miR-141-3p, miR-370-3p, miR-2284n, miR-503-3p, miR-381-3p, miR-362-5p, miR-3154, miR-10b-3p, miR-190a-3p, miR-7144-5p, miR-494-3p, miR-652-5p, let-7c-3p, miR-30c-1-3p, miR-326, miR-3955-3p, miR-3085-3p, miR-105-1, novel\_4, miR-27a-3p, miR-221-3p, miR-500-5p, miR-143-5p, miR-4791, miR-484, miR-125b-2-3p, miR-541-3p, miR-452-5p, miR-194b-5p, miR-362-5p, miR-2285n, miR-371a-5p, miR-2285y, miR-2284q, miR-2285t, miR-3064-5p, miR-7977, miR-499b-5p, miR-3082-5p, miR-27a-3p, miR-129b-5p, miR-877-3p, miR-216c-5p, miR-29b-1-5p, miR-374a-5p, miR-185-3p, miR-216a-5p, miR-2284m, miR-21-3p, miR-221-5p, miR-30b-3p, miR-3600, miR-148b-3p, miR-200b, miR-383-5p, miR-215-5p, miR-2300b-3p, novel\_133, miR-140-3p, miR-5703, miR-2904, let-7a-3p, miR-145a-3p, miR-539-5p, miR-425-5p, miR-3074-2-3p, miR-206-3p, miR-338-3p, miR-222-3p, miR-655-3p, miR-29b-2-5p, miR-17-3p, miR-450b-3p, miR-708-5p, miR-221-5p, miR-3065-3p, miR-370-5p, miR-139-5p, miR-192-5p, miR-877-5p, let-7f-1-3p, miR-21a-3p, miR-133b-3p, let-7g-3p, novel\_99, miR-6240, miR-22841, miR-2285r, miR-296-3p, miR-194a, miR-105-5p, miR-339-5p, miR-419-5p, miR-3535, miR-222-

miR-2284l, miR-503-3p, let-7j, miR-6240, miR-363-5p, miR-1343-5p, miR-125a-5p, miR-377-3p, miR-146a, miR-7-5p, miR-330-3p, miR-3141, miR-103, miR-133b-5p, miR-103a-3p, miR-16b, miR-7862, miR-497-5p, miR-4508, miR-181a-5p, miR-7b-5p, miR-873a-5p, miR-371b-3p, miR-24-3p, miR-326-3p, novel\_27, miR-135a-2-3p, novel\_101, miR-3957-3p, miR-22-5p, miR-28c, miR-4324, miR-15a, miR-16a, novel\_69, miR-299b-3p, miR-677, miR-26b-5p, miR-320b, miR-107, miR-1291, miR-195a-5p, miR-379-5p, miR-135b-5p, miR-146b-5p, miR-3141, miR-1306, miR-450b-5p, miR-28b, miR-181a-2-3p, miR-181b-5p, miR-2898, miR-107, miR-664-3p, miR-2285af, miR-2411-5p, miR-322-5p, novel\_121, miR-2284z, miR-134-5p, miR-6517, miR-2285ad, miR-299a-3p, miR-1224-5p, miR-7641, miR-134, miR-330-5p, miR-1343-5p, miR-374a-3p, miR-1197-3p, miR-1306-5p, miR-193a-5p, miR-16-5p, miR-374b-3p, miR-28-5p, miR-134-5p, miR-486b-3p, miR-410-3p, miR-135a-5p, miR-331-3p, miR-125b-5p, miR-769, miR-125a, miR-671-5p, miR-488-3p, miR-3154, miR-758-3p, miR-4532, miR-424-5p, miR-382-3p, miR-1468, miR-103a-2-5p, miR-146b, miR-326, miR-1306-5p, miR-199a-3p, miR-16b, miR-29b-1-5p, miR-147a, miR-330-3p, miR-151a-3p, miR-181b-2-3p, miR-2426, miR-2284aa, miR-484, miR-758-3p, miR-361-3p, miR-2447, miR-219a-5p, miR-181d-5p, miR-4726-5p, miR-2284q, miR-374a-3p, miR-107-5p, miR-2285y, miR-769-5p, miR-3082-5p, miR-452-3p, miR-4792, miR-664b, miR-139-5p, miR-504, miR-361-3p, miR-129b-5p, miR-29b-1-5p, miR-2432, miR-2411, miR-486-3p, miR-146a-5p, miR-466i-5p, miR-760-3p, miR-202-5p, miR-299-3p, miR-30b-3p, miR-2285p, miR-26a-5p, miR-185-3p, miR-125b, miR-324-3p, miR-222-5p, miR-15a-5p, miR-199a-3p, miR-184-3p, miR-378d, miR-133a-3p, miR-2300b-3p, miR-769-5p, miR-181c-5p, miR-3184-3p, miR-145a-3p, miR-665-5p, miR-1468-5p, miR-874-5p, miR-708-5p, miR-2285i, miR-665, miR-151-3p, miR-324-3p, miR-130-5p, miR-377-5p, miR-155-5p, miR-148a-5p, novel\_99, miR-2284ab, miR-145a-5p, miR-148b-5p, novel\_83, miR-199a-3p, miR-155-5p, miR-2284d, miR-222-5p, miR-145b, miR-126b-5p, miR-552-3p, miR-532-5p, miR-155-5p, miR-3604, miR-2284k, miR-199a-3p, miR-2285j, miR-2284y, miR-2284a, miR-148b-5p, miR-452-5p, miR-2284v, miR-363, miR-26b-3p, miR-505-3p, miR-21-3p, miR-2355-5p, miR-3600, miR-6516-5p, miR-383-5p, miR-6516, miR-7b-5p, miR-1285, miR-542-3p, miR-361-3p, miR-3591-3p, miR-433-3p, miR-450b-5p, miR-455-5p, miR-505-3p, miR-23a-5p, novel\_101, miR-1271-3p, miR-8485, miR-376c-5p, miR-125a-3p, miR-7-5p, miR-665, miR-455-5p

CEP164 ENSOARGO(centrosome) 3p, miR-125b-5p, miR-769, miR-125a, miR-671-5p, miR-488-3p, miR-3154, miR-758-3p, miR-4532, miR-424-5p, miR-382-3p, miR-1468, miR-103a-2-5p, miR-146b, miR-326, miR-1306-5p, miR-199a-3p, miR-16b, miR-29b-1-5p, miR-147a, miR-330-3p, miR-151a-3p, miR-181b-2-3p, miR-2426, miR-2284aa, miR-484, miR-758-3p, miR-361-3p, miR-2447, miR-219a-5p, miR-181d-5p, miR-4726-5p, miR-2284q, miR-374a-3p, miR-107-5p, miR-2285y, miR-769-5p, miR-3082-5p, miR-452-3p, miR-4792, miR-664b, miR-139-5p, miR-504, miR-361-3p, miR-129b-5p, miR-29b-1-5p, miR-2432, miR-2411, miR-486-3p, miR-146a-5p, miR-466i-5p, miR-760-3p, miR-202-5p, miR-299-3p, miR-30b-3p, miR-2285p, miR-26a-5p, miR-185-3p, miR-125b, miR-324-3p, miR-222-5p, miR-15a-5p, miR-199a-3p, miR-184-3p, miR-378d, miR-133a-3p, miR-2300b-3p, miR-769-5p, miR-181c-5p, miR-3184-3p, miR-145a-3p, miR-665-5p, miR-1468-5p, miR-874-5p, miR-708-5p, miR-2285i, miR-665, miR-151-3p, miR-324-3p, miR-130-5p, miR-377-5p, miR-155-5p, miR-148a-5p, novel\_99, miR-2284ab, miR-145a-5p, miR-148b-5p, novel\_83, miR-199a-3p, miR-155-5p, miR-2284d, miR-222-5p, miR-145b, miR-126b-5p, miR-552-3p, miR-532-5p, miR-155-5p, miR-3604, miR-2284k, miR-199a-3p, miR-2285j, miR-2284y, miR-2284a, miR-148b-5p, miR-452-5p, miR-2284v

CDK7 ENSOARGO(cyclin-d) 3p, miR-125b-5p, miR-769, miR-125a, miR-671-5p, miR-488-3p, miR-3154, miR-758-3p, miR-4532, miR-424-5p, miR-382-3p, miR-1468, miR-103a-2-5p, miR-146b, miR-326, miR-1306-5p, miR-199a-3p, miR-16b, miR-29b-1-5p, miR-147a, miR-330-3p, miR-151a-3p, miR-181b-2-3p, miR-2426, miR-2284aa, miR-484, miR-758-3p, miR-361-3p, miR-2447, miR-219a-5p, miR-181d-5p, miR-4726-5p, miR-2284q, miR-374a-3p, miR-107-5p, miR-2285y, miR-769-5p, miR-3082-5p, miR-452-3p, miR-4792, miR-664b, miR-139-5p, miR-504, miR-361-3p, miR-129b-5p, miR-29b-1-5p, miR-2432, miR-2411, miR-486-3p, miR-146a-5p, miR-466i-5p, miR-760-3p, miR-202-5p, miR-299-3p, miR-30b-3p, miR-2285p, miR-26a-5p, miR-185-3p, miR-125b, miR-324-3p, miR-222-5p, miR-15a-5p, miR-199a-3p, miR-184-3p, miR-378d, miR-133a-3p, miR-2300b-3p, miR-769-5p, miR-181c-5p, miR-3184-3p, miR-145a-3p, miR-665-5p, miR-1468-5p, miR-874-5p, miR-708-5p, miR-2285i, miR-665, miR-151-3p, miR-324-3p, miR-130-5p, miR-377-5p, miR-155-5p, miR-148a-5p, novel\_99, miR-2284ab, miR-145a-5p, miR-148b-5p, novel\_83, miR-199a-3p, miR-155-5p, miR-2284d, miR-222-5p, miR-145b, miR-126b-5p, miR-552-3p, miR-532-5p, miR-155-5p, miR-3604, miR-2284k, miR-199a-3p, miR-2285j, miR-2284y, miR-2284a, miR-148b-5p, miR-452-5p, miR-2284v

SLA ENSOARGO(Src-like) 3p, miR-125b-5p, miR-769, miR-125a, miR-671-5p, miR-488-3p, miR-3154, miR-758-3p, miR-4532, miR-424-5p, miR-382-3p, miR-1468, miR-103a-2-5p, miR-146b, miR-326, miR-1306-5p, miR-199a-3p, miR-16b, miR-29b-1-5p, miR-147a, miR-330-3p, miR-151a-3p, miR-181b-2-3p, miR-2426, miR-2284aa, miR-484, miR-758-3p, miR-361-3p, miR-2447, miR-219a-5p, miR-181d-5p, miR-4726-5p, miR-2284q, miR-374a-3p, miR-107-5p, miR-2285y, miR-769-5p, miR-3082-5p, miR-452-3p, miR-4792, miR-664b, miR-139-5p, miR-504, miR-361-3p, miR-129b-5p, miR-29b-1-5p, miR-2432, miR-2411, miR-486-3p, miR-146a-5p, miR-466i-5p, miR-760-3p, miR-202-5p, miR-299-3p, miR-30b-3p, miR-2285p, miR-26a-5p, miR-185-3p, miR-125b, miR-324-3p, miR-222-5p, miR-15a-5p, miR-199a-3p, miR-184-3p, miR-378d, miR-133a-3p, miR-2300b-3p, miR-769-5p, miR-181c-5p, miR-3184-3p, miR-145a-3p, miR-665-5p, miR-1468-5p, miR-874-5p, miR-708-5p, miR-2285i, miR-665, miR-151-3p, miR-324-3p, miR-130-5p, miR-377-5p, miR-155-5p, miR-148a-5p, novel\_99, miR-2284ab, miR-145a-5p, miR-148b-5p, novel\_83, miR-199a-3p, miR-155-5p, miR-2284d, miR-222-5p, miR-145b, miR-126b-5p, miR-552-3p, miR-532-5p, miR-155-5p, miR-3604, miR-2284k, miR-199a-3p, miR-2285j, miR-2284y, miR-2284a, miR-148b-5p, miR-452-5p, miR-2284v

miR-485-3p, miR-769-5p, miR-576-3p, miR-2284q, miR-502b, miR-2285t, miR-17-3p, miR-452-5p, miR-495-3p, miR-2447, miR-7705, miR-323c, miR-376b-3p, miR-3065-5p, miR-148a-3p, miR-376a-3p, miR-299b-5p, miR-450b-3p, miR-4792, miR-376d, novel\_69, miR-3596, miR-2404, miR-455-5p, novel\_51, miR-182-5p, miR-105-5p, miR-1468, let-7a-2-3p, miR-8485, novel\_23, miR-412-3p, miR-296-5p, miR-2889, miR-455-5p, miR-2284aa, miR-1260b, miR-101a-5p, miR-544a, miR-138, miR-105-1, miR-544b, miR-2459, miR-9788-3p, miR-376b-3p, miR-320e, miR-1468-5p, miR-500, miR-874-5p, miR-4492, miR-664a, miR-17-3p, miR-138-5p, miR-1306-5p, miR-1260b, miR-769-5p, miR-6525, miR-500a-3p, miR-485-5p, miR-582-5p, miR-190a-3p, miR-7144-5p, let-7g-3p, let-7g-3p, miR-182-5p, miR-21-3p, miR-503-3p, miR-496-3p, miR-154b-5p, miR-151b, miR-204-3p, miR-769, miR-544-3p, miR-582-5p, miR-125a-3p, miR-2285af, miR-196a-3p, miR-1260a, miR-376b-3p, miR-152-3p, miR-543-5p, miR-466i-5p, miR-127-5p, miR-17-3p, miR-450a-2-3p, miR-369-3p, miR-2285w, miR-3529-3p, miR-1271-3p, miR-2432, novel\_39, miR-148b-5p, miR-5703, miR-3578, miR-496, let-7a-2-3p, miR-3600, miR-412, miR-214-5p, miR-671-3p, miR-151-5p, miR-2284z, miR-2284h-5p, miR-532-3p, miR-148b-3p, miR-2284w, miR-449a, novel\_1, miR-199c, miR-22-5p, miR-6402, miR-4324, miR-34c, miR-411b-3p, miR-34b, novel\_68, miR-412-3p, miR-135b-5p, miR-376b-5p, miR-2285ab, miR-3591-3p, miR-216a-3p, miR-2284l, miR-2285r, miR-345-5p, miR-6240, miR-130b-5p, miR-628-5p, miR-2483-5p, miR-101-5p, miR-125a-5p, miR-330-3p, miR-2284d, miR-544b, miR-2355-3p, miR-1260b, miR-138, miR-2284ab, miR-27b-3p, miR-188-5p, miR-7862, miR-181a-5p, miR-542-3p, miR-374b-3p, miR-450c-3p, miR-22-3p, miR-197-3p, miR-1260b, miR-2284v, miR-3607-3p, miR-138-5p, miR-2284k, miR-135a-5p, miR-409-3p, miR-125b-5p, miR-34c-5p, miR-503-3p, miR-125a, miR-2355-5p, miR-345-5p, miR-2318, miR-876-3p, miR-1814c, miR-1248, miR-376c-5p, miR-376c-5p, miR-490-3p, miR-2284a, miR-2284y, miR-2385-3p, miR-181b-5p, miR-200c-3p, miR-200c, miR-2397-5p, miR-2285af, miR-1260a, miR-217, miR-302a-5p, miR-9-5p, novel\_121, miR-450a-1-3p, miR-2284z, miR-545-5p, miR-429-3p, miR-582-3p, miR-496, miR-128-3p, miR-200b-3p, miR-1290, novel\_111, miR-885-5p, miR-541-3p, miR-3059-5p, miR-181d-5p, miR-2284j, miR-9-5p, miR-2285f, miR-101-3p, miR-2440, miR-2285n, miR-2285y, miR-27a-3p, miR-2284g, miR-2285u, miR-1983, novel\_94, miR-335-3p, miR-361-3p, miR-140-5p, miR-378j, miR-2310, miR-382-3p, miR-124a, miR-2284b, miR-23a-3p, miR-153-3p, miR-199a-3p, miR-142-3p, miR-153, miR-148b-5p, miR-199b-3p, novel\_78, miR-330-3p, miR-27a-3p, miR-2426, miR-544a, miR-3120-5p, miR-2284aa, miR-541, miR-484, miR-181c-5p, miR-3184-3p, miR-450b-3p, miR-130b-5p, miR-208b-5p, miR-544-3p, miR-22-3p, miR-496-3p, miR-221-5p, miR-2331-3p, novel\_107, miR-216b-3p, miR-21-3p, miR-345-5p, miR-543-3p, miR-450a-1-3p, miR-129b-3p, miR-130a-5p, miR-142a-3p, miR-664b-3p, miR-216c-5p, miR-369-3p, miR-760-3p, miR-2284m, miR-221-5p, miR-34b-5p, miR-106a-3p, miR-92a-1-5p, miR-125b, miR-200b, miR-

miR-142-3p, miR-184-3p, miR-378a-3p, miR-378i, miR-328-3p, miR-1247-5p, miR-212-5p, miR-18a-3p, miR-422a, miR-92a-1-5p, miR-210-5p, miR-143-3p, miR-376c-3p, miR-369-3p, miR-329a-5p, miR-1895, miR-625-5p, miR-339b, miR-129b-3p, miR-15b-5p, miR-151b, miR-377-3p, miR-376e-3p, miR-10a, miR-301a-3p, miR-2284s, miR-582-5p, miR-296-3p, miR-454-3p, miR-4492, miR-664a-5p, miR-665, miR-15b-3p, miR-2285j, miR-3184-5p, miR-346, miR-665-5p, miR-3074-5p, miR-362-3p, miR-1a-3p, miR-541, miR-2284r, miR-329-3p, miR-1185-3p, miR-381-5p, miR-146b, miR-130b-3p, miR-491-5p, miR-16b, miR-8485, miR-378d, miR-744-3p, miR-676-3p, miR-574-3p, miR-1983, miR-9-3p, miR-493-5p, miR-378j, miR-4443, miR-1185-2-3p, miR-203-3p, miR-2483-3p, miR-378g, miR-2285u, miR-2319b, miR-24-1-5p, miR-2440, miR-423-5p, miR-1285-5p, novel\_111, miR-3956-3p, miR-2447, miR-23b-5p, miR-330-5p, miR-1343-5p, novel\_121, miR-134-5p, miR-322-5p, miR-18b-5p, novel\_79, miR-2285ad, novel\_127, novel\_96, miR-200a-3p, miR-28-3p, miR-125a-3p, miR-148b-5p, miR-1248, miR-329b, miR-329a, miR-2318, miR-767, miR-376c-3p, miR-1271, miR-125a, miR-542-5p, miR-874-3p, miR-3068-3p, miR-134-5p, miR-125b-5p, miR-2433, miR-1197-3p, miR-193a-5p, miR-16-5p, miR-28a-3p, miR-188-5p, miR-26a-2-3p, miR-497-5p, miR-381-5p, miR-16b, miR-197-3p, miR-1843b-5p, miR-7b-5p, miR-194-3p, miR-149-5p, miR-134-3p, miR-339-5p, miR-31-5p, miR-193a-3p, novel\_51, miR-377-3p, miR-146a, miR-7-5p, let-7a-2-3p, let-7j, miR-432-3p, miR-432-3p, let-7f-2-3p, let-7f-2-3p, miR-493-5p, miR-378f, miR-2319a, miR-146b-5p, miR-412-3p, miR-3591-3p, miR-1306, miR-669, miR-6535, miR-3120-3p, miR-3074-5p, miR-329-5p, novel\_68, miR-6123, miR-206, miR-425-5p, novel\_87, miR-576-3p, miR-4324, miR-301b-3p, miR-193b-3p, miR-378d, miR-Q41 miR-1197-5p miR-188-3p miR-1193 miR-140-3p miR-362-

miR-6527, miR-9-5p, miR-2447, miR-423-5p, miR-219a-2-3p, miR-361-3p, miR-2285y, miR-2285n, miR-3964, miR-4726-5p, miR-499a-5p, miR-499b-5p, miR-7977, miR-664b, miR-139-5p, miR-24-1-5p, miR-3064-5p, miR-2319b, miR-20a-3p, miR-7857-3p, miR-499a-3p, miR-378g, miR-3596, miR-2483-3p, miR-381-3p, miR-378j, miR-361-3p, miR-199b-5p, miR-96-5p, miR-23a-3p, miR-744-3p, miR-124a, miR-2330-5p, miR-106a-5p, miR-30c-1-3p, miR-29b-1-5p, miR-106b-5p, miR-199a-3p, miR-320b, miR-326, miR-199b-5p, miR-3085-3p, miR-3955-3p, miR-5010-3p, miR-199b-3p, novel\_78, miR-330-3p, miR-1343-3p, miR-216a-3p, miR-1298-3p, miR-412-3p, miR-296-5p, miR-1271, miR-425-5p, miR-2330-3p, miR-129-2-3p, miR-3074-5p, miR-4510, miR-3184-5p, miR-6134, miR-219b-3p, miR-665, miR-3604, miR-4492, miR-874-5p, miR-708-5p, miR-450b-3p, miR-487b-5p, miR-451a, miR-17-3p, miR-664a, miR-3065-3p, miR-21-3p, miR-216b-3p, miR-296-3p, miR-552-3p, miR-30c-1-3p, novel\_25, novel\_32, miR-22-3p, miR-204-3p, miR-499b-3p, miR-582-5p, miR-6130, miR-139-5p, miR-450a-1-3p, miR-885-3p, miR-345-5p, miR-20a, miR-329a-5p, miR-486-3p, miR-143-3p, miR-664b-3p, miR-29b-1-5p, miR-122-3p, miR-185-3p, miR-2285p, miR-21-3p, miR-320d, miR-106a, miR-212-5p, miR-30d-3p, miR-18a-3p, miR-3960, miR-106a, miR-616-3p, miR-199a-3p, miR-532-3p, miR-7859, miR-23b-3p, miR-210-3p, miR-23c, miR-124-3p, novel\_133, miR-4429, miR-17-3p, novel\_101, miR-29c-3p, novel\_27, miR-326-3p, miR-2284w, miR-199b-5p, miR-1307-5p, miR-425-5p, miR-20a-5p, miR-421-5p, miR-199c, miR-502b, miR-6119-3p, novel\_1, miR-29a, miR-379-3p, miR-320b, miR-329-5p, miR-3074-5p, miR-669, miR-320c, miR-6535, miR-2404, miR-670-3p, novel\_69, miR-29a-3p, miR-150-5p, miR-3591-3p, miR-18a-3p, miR-378b, miR-3141, miR-9851-3p, miR-19a-3p, miR-363-5p, miR-668-3p, miR-6240, miR-345-5p, miR-654-3p, miR-132-3p, miR-330-3p, miR-30b-3p, miR-541, miR-873a-5p, miR-432, miR-3120-5p, miR-26a-2-3p, miR-450b-5p, miR-30b-3p, miR-138, miR-222-5p, novel\_4, miR-1343-3p, miR-455-3p, miR-1298-3p, miR-147a, miR-3431, miR-432-5p, novel\_51, miR-182-5p, miR-3085-3p, miR-491-5p, miR-378a-5p, miR-628-5p, miR-432-3p, miR-432-3p, miR-30c-1-3p, miR-18a-3p, miR-129b-5p, miR-3591-3p, miR-3970, miR-361-3p, miR-504, miR-1291, miR-655-5p, miR-499b-5p, miR-452-3p, miR-3064-5p, miR-669, miR-3082-5p, novel\_69, miR-769-5p, miR-371a-5p, miR-2285n, miR-502-5p, miR-490-5p, miR-3956-3p, miR-212-3p, miR-541-3p, novel\_60, miR-423-5p, miR-1285-5p, novel\_111, miR-3959-3p, miR-24-3p, miR-140-3p, miR-188-3p, miR-5703, miR-2427, miR-193b-5p, miR-155-5p, miR-493-3p, miR-6517, miR-18a-3p, miR-2285ad, miR-486-5p, miR-616-3p, miR-222-5p, miR-92a-1-5p, miR-185-3p, miR-30c-2-3p, novel\_17, novel\_127, novel\_96, miR-21-3p, miR-466i-5p, miR-345-3p, miR-3064-5p, miR-29a-5p, miR-486-3p, miR-21a-3p, miR-485-5p, miR-876-3p, miR-296-3p, miR-182-5p, miR-216b-3p, miR-21-3p, miR-874-3p, miR-30c-1-3p, miR-2331-3p, miR-545-3p, miR-504-5p, miR-155-5p, miR-324-5p, miR-769, miR-6740-5p, miR-135a-1-3p, miR-486b-3p, miR-129-5p, miR-155-5p, miR-138-5p, miR-145a-3p, miR-338-3p, miR-6134, miR-3184-5p, miR-769-5p, miR-6525

FAM117A ENSOARGO(family w 3p, miR-196a-5p, miR-196b-5p, miR-193a

MEOX1 ENSOARGO(mesenchy 3p, miR-196a-5p, miR-196b-5p, miR-193a

TMEM144 ENSOARGO(transmem 3p, miR-196a-5p, miR-196b-5p, miR-193a

miR-2285e, miR-2459, miR-216a-3p, novel\_4, miR-1343-3p, miR-409b, miR-3120-5p, miR-2426, miR-30b-3p, miR-412-3p, miR-541, miR-296-5p, miR-3187-3p, miR-4532, miR-23a-3p, let-7a-5p, let-7e, miR-25-5p, miR-3085-3p, miR-29b-1-5p, novel\_103, miR-1306-5p, miR-326, miR-203-3p, let-7d-5p, miR-2483-3p, miR-378g, miR-7977, miR-2319b, miR-10b, miR-3064-5p, miR-504, miR-361-3p, miR-423-5p, miR-361-3p, miR-9-5p, miR-1296-5p, miR-6527, miR-541-3p, miR-2447, miR-4454, miR-490-5p, miR-335, miR-4726-5p, miR-769-5p, novel\_82, miR-328-3p, novel\_83, miR-23c, miR-487a-3p, miR-23b-3p, miR-212-5p, miR-485-3p, miR-380-5p, miR-18a-3p, miR-33b-3p, miR-5703, miR-2366, miR-1961, miR-2300b-3p, miR-2424, miR-486-3p, miR-125b-2-3p, miR-377-5p, miR-29b-1-5p, miR-183-5p, let-7k, miR-99a-3p, miR-760-3p, miR-98-5p, miR-125b, miR-185-3p, miR-92a-1-5p, miR-210-5p, let-7i-5p, miR-204-3p, miR-22-3p, miR-6130, miR-377-3p, miR-6516, miR-296-3p, miR-532-5p, miR-552-3p, miR-370-5p, miR-660-5p, miR-2331-3p, miR-504-5p, miR-1827, miR-1895, miR-129b-3p, miR-2285c, miR-338-3p, miR-3184-5p, let-7b-5p, miR-122-5p, miR-224-5p, miR-6525, miR-769-5p, miR-4510, let-7b, miR-874-5p, miR-4492, miR-708-5p, miR-664a, miR-29b-2-5p, miR-665, let-7f, miR-15b-3p, miR-194-3p, miR-185-5p, miR-134-3p, let-7g-5p, miR-2285g, miR-377-5p, miR-187-3p, miR-744-5p, miR-2889, miR-219a-1-3p, miR-30b-3p, miR-22-3p, miR-197-3p, miR-1843b-5p, miR-296-3p, miR-363-5p, miR-668-3p, miR-2483-5p, miR-660, miR-125a-5p, miR-378a-5p, miR-2331-5p, miR-3141, miR-377-3p, miR-296-3p, miR-224-5p, miR-669, novel\_69, miR-411b-3p, miR-2404, miR-146b-3p, miR-320b, miR-6395, let-7e-5p, miR-1291, miR-18a-3p, miR-1306, miR-2387, miR-3141, miR-2428, miR-326-3p, miR-371b-3p, miR-1193, miR-758-5p, miR-335-5p, miR-125a-2-3p, let-7i, miR-28c, miR-6529b, miR-1291, miR-6516, miR-30d-3p, miR-187-3p, miR-669, miR-185-5p, miR-3970, miR-27b-5p, miR-485-5p, miR-345-5p, miR-345-5p, miR-3963, miR-425-5p, miR-30a-3p, miR-345-5p, miR-2478, miR-185-3p, miR-30a-3p, miR-30e-3p, miR-543-5p, miR-25-5p, miR-2426, miR-1260b, miR-26a-2-3p, miR-134-3p, miR-146b, miR-1343-5p, miR-146a, miR-2285r, miR-654-3p, miR-539-3p, miR-503-3p, miR-130b-5p, miR-1388-3p, miR-668-3p, miR-504, miR-335-3p, miR-9851-3p, miR-146b-5p, miR-18a-3p, miR-378g, miR-3082-5p, miR-670-3p, miR-6535, miR-3120-3p, miR-7977, novel\_82, miR-28c, miR-6529b, novel\_87, miR-2284w, miR-452-5p, miR-2904, miR-1343-5p, miR-487a-3p, miR-505-5p, miR-214-5p, miR-18a-3p, miR-485-3p, novel\_127, miR-205-5p, miR-1260a, miR-125a-3p, miR-216a-5p, miR-28b, miR-146a-5p, miR-2285b, miR-490-3p, miR-183-5p, miR-4286, miR-767, let-7g-3p, miR-2312, miR-625-5p, miR-424-3p, miR-216b-5p, miR-2331-3p, miR-504-5p, miR-548o-3p, novel\_107, miR-2355-5p, miR-615-5p, miR-767-5p, miR-130b-5p, miR-34c-3p, miR-3969, miR-1260b

AK8 ENSOARGO(adenylat

ZBTB21 ENSOARGO(zinc fin

SLC9A9 ENSOARGO(solute c

let-7a-2-3p, miR-7641, miR-214-5p, miR-545-5p, miR-2411-5p, miR-1271-5p, miR-339a, miR-217, miR-30c-2-3p, miR-376b-3p, miR-181a-2-3p, miR-4286, miR-29b-2-5p, miR-1271-3p, miR-490-3p, miR-362-5p, miR-671-5p, miR-7144-5p, miR-23a-5p, let-7g-3p, miR-215-5p, miR-370-3p, miR-154b-5p, miR-2284n, miR-331-3p, miR-2332, miR-486b-3p, miR-204-5p, miR-138-5p, miR-133a-3p, miR-500b-5p, miR-374b-3p, miR-873a-5p, miR-7862, miR-30b-3p, miR-138, miR-2284ab, miR-185-5p, miR-503-5p, miR-2284d, miR-503-5p, miR-224-5p, miR-125a-5p, miR-363-5p, miR-654-3p, miR-18a-3p, miR-376b-3p, miR-2387, miR-2285ab, miR-9851-3p, miR-1291, miR-2404, miR-323a-5p, miR-146b-3p, miR-502-5p, miR-147-5p, miR-203b-5p, miR-128-1-5p, miR-135a-2-3p, miR-342-3p, miR-2428, novel\_27, miR-24-3p, miR-371b-3p, miR-211, miR-1197-5p, miR-124-3p, miR-362-3p, miR-2300b-3p, miR-215-5p, miR-548e-3p, miR-383-5p, miR-125b, miR-185-3p, miR-196a-3p, miR-21-3p, miR-221-5p, miR-105-3p, miR-216c-5p, miR-2411, miR-146a-5p, miR-125b-2-3p, miR-29b-1-5p, miR-27b-5p, novel\_99, let-7g-3p, miR-133b-3p, miR-182-5p, miR-221-5p, miR-877-5p, novel\_32, miR-22-3p, miR-204-3p, miR-323-5p, miR-139-5p, miR-193b-3p, miR-192-5p, miR-29b-2-5p, miR-320e, miR-324-3p, miR-132-5p, miR-664a, miR-1271, miR-6134, miR-30b-3p, miR-125b-2-3p, miR-412-3p, miR-7857, miR-484, miR-296-5p, miR-6529a, miR-2300a-5p, miR-409b, miR-9788-3p, miR-500-5p, miR-362-3p, miR-5126, miR-1306-5p, miR-342, miR-25-5p, miR-3955-3p, miR-3085-3p, miR-33a-5p, miR-1839-3p, miR-30c-1-3p, miR-361-3p, novel\_94, miR-147-3p, miR-7977, miR-499b-5p, miR-20a-3p, miR-3064-5p, miR-376d, miR-371a-5p, miR-2284q, miR-2285t, miR-4726-5p, miR-2285f, miR-541-3p, novel\_60, miR-362-5p, miR-1290, miR-885-3p, novel\_79, miR-412, novel\_127, miR-3064-5p, miR-1248, miR-329a, miR-329b, miR-1271, miR-125a, miR-3955-5p, miR-549-3p, miR-92a-1-5p, miR-422a, miR-205-5p, miR-1260a, miR-125a-3p, miR-34b-5p, miR-3653-3p, miR-221-5p, miR-152-3p, miR-760-3p, miR-30a-3p, miR-329a-5p, miR-2424, miR-200a, novel\_39, miR-1271-3p, miR-3956-5p, miR-148b-5p, miR-376c-3p, miR-124-3p, miR-23b-5p, miR-1197-5p, miR-378a-3p, miR-5703, miR-378i, miR-2408, miR-105-2, miR-34a-5p, miR-148a-5p, miR-3600, miR-7641, miR-30d-3p, miR-486-5p, miR-148b-3p, miR-378h, miR-6740-5p, miR-30a-3p, miR-2285j, miR-494-5p, miR-30e-3p, miR-708-5p, miR-487a-5p, miR-874-5p, miR-28-5p, miR-487b-5p, miR-6516-3p, miR-378c, miR-145a-3p, miR-4510, miR-378c, miR-1260b, miR-487b-5p, miR-3154, miR-1827, miR-2318, miR-329b, miR-370-3p, miR-296-3p, miR-3956, miR-221-5p, miR-378a-3p, miR-376c-3p, miR-376e-3p, miR-34c-5p, miR-300-3p, miR-132-5p, miR-27a-5p, miR-323-5p, miR-6130, miR-105-5p, miR-1306-5p, miR-296-3p, miR-376b, miR-124a, miR-8485, miR-296-3p, miR-193a, miR-378d, miR-378b, miR-143-5p, miR-26a-2-3p, miR-378c, miR-1260b, miR-3955-5p, miR-409b, miR-105-1, miR-1343-3p, miR-455-3p, miR-148b-5p, miR-2459, miR-34c, miR-2440, miR-576-3p, miR-7134-3p, miR-147-5p, miR-6527, miR-135a-2-3p, miR-885-5p, miR-449a, miR-1307-3p, novel\_111, miR-1306, miR-361-3p, miR-148a-3p, miR-544-5p, miR-378f, miR-9-3p, miR-2285u, miR-329-5p, miR-378b, miR-4443, miR-378e, miR-323a-5p, miR-3596, miR-34b

|        |                   |                                                                                                                                                                                                                                                                                                                                                                                                                                                                                                                                                                                                                                                                                                                                                                                                                                                                                                                                                                                                                                                                                                                                                                                                                                                                                                     |
|--------|-------------------|-----------------------------------------------------------------------------------------------------------------------------------------------------------------------------------------------------------------------------------------------------------------------------------------------------------------------------------------------------------------------------------------------------------------------------------------------------------------------------------------------------------------------------------------------------------------------------------------------------------------------------------------------------------------------------------------------------------------------------------------------------------------------------------------------------------------------------------------------------------------------------------------------------------------------------------------------------------------------------------------------------------------------------------------------------------------------------------------------------------------------------------------------------------------------------------------------------------------------------------------------------------------------------------------------------|
| MAPRE2 | ENSOARGO(microtub | <p>miR-382, miR-6240, miR-130b-5p, miR-345-5p, miR-296-3p, miR-194a, miR-182-5p, miR-29b-1-5p, miR-330-3p, miR-3141, novel_103, miR-296-3p, miR-224-5p, miR-214-3p, miR-125a-5p, miR-491-5p, miR-330-3p, novel_4, miR-2320-3p, miR-147a, miR-194-5p, miR-22-3p, miR-1434-3p, miR-301b-5p, miR-296-5p, miR-1260b, miR-29b, miR-29c-3p, miR-194b-5p, miR-2447, miR-423-5p, miR-211, miR-382-5p, miR-301a-5p, miR-4324, miR-2285n, miR-29a, miR-211-5p, miR-655-5p, miR-2319b, miR-29a-3p, miR-489, miR-3141, miR-135b-5p, miR-7975, miR-1291, miR-450b-3p, miR-410-5p, miR-345-3p, miR-29b-2-5p, miR-490-3p, miR-192-3p, miR-1271-3p, novel_39, miR-486-3p, miR-125b-2-3p, miR-29b-1-5p, miR-125b, miR-92a-1-5p, miR-216a-5p, miR-1260a, novel_96, miR-200a-3p, miR-21-3p, miR-466i-5p, miR-450a-2-3p, miR-2285ad, novel_83, miR-582-3p, miR-140-3p, miR-5703, miR-29d-3p, miR-885-3p, miR-411-3p, miR-214, miR-3958-5p, miR-4510, miR-539-5p, miR-145-3p, miR-3184-5p, miR-1260b, miR-224-5p, miR-6525, miR-135a-5p, miR-3604, miR-29b-2-5p, miR-125b-5p, miR-29b-3p, miR-486b-3p, miR-130b-5p, miR-204-5p, miR-141-3p, miR-296-3p, miR-3956, miR-182-5p, miR-125a, miR-548o-3p, miR-204-3p, miR-22-3p, miR-6130, miR-411, miR-21a-3p, miR-1827, miR-7144-5p, miR-885-3p, miR-345-5p, miR-345-5p</p> |
| PPM1M  | ENSOARGO(protein  | <p>miR-500b-5p, miR-6525, miR-769-5p, miR-362-5p, novel_44, miR-346, miR-145-3p, miR-4492, miR-486b-3p, miR-769-5p, miR-132-5p, miR-769, novel_32, miR-151b, miR-221-5p, miR-370-3p, novel_94, miR-18a-3p, miR-362-5p, miR-486-3p, miR-2898, miR-30b-3p, miR-221-5p, novel_127, miR-2397-5p, miR-450a-1-3p, miR-500-5p, miR-151-5p, miR-18a-3p, miR-423-3p, miR-212-5p, miR-3120-5p, novel_133, miR-218-2-3p, miR-2904, miR-140-3p</p>                                                                                                                                                                                                                                                                                                                                                                                                                                                                                                                                                                                                                                                                                                                                                                                                                                                              |



miR-193a-5p, miR-2284v, miR-1260b, miR-1197-3p, miR-6740-5p, miR-2284k, novel\_63, miR-331-5p, miR-2355-5p, miR-2285aa, miR-1271, miR-331-5p, miR-23b, miR-376c-5p, miR-331-5p, miR-1248, miR-876-3p, miR-2318, miR-3064-5p, miR-29a-5p, miR-200a, miR-2284y, miR-2285b, miR-148b-5p, miR-205-5p, miR-664-3p, miR-200a-3p, novel\_96, novel\_127, miR-152-3p, miR-1224-5p, miR-2285ad, miR-2284z, miR-450a-1-3p, novel\_121, miR-23b-5p, miR-3591-5p, miR-155-5p, miR-335-5p, miR-199b-5p, miR-576-3p, miR-26b-5p, miR-3120-3p, miR-6535, miR-320c, miR-411b-3p, miR-3591-3p, miR-216a-3p, miR-3065-5p, miR-376b-5p, miR-148a-3p, miR-668-3p, miR-6240, miR-493-5p, let-7j, miR-503-3p, let-7a-2-3p, miR-2285r, miR-432-3p, miR-432-3p, miR-194a, miR-7-5p, miR-377-3p, miR-483-3p, miR-340-3p, miR-194-3p, novel\_116, miR-149-5p, miR-3535, miR-450c-3p, miR-432, miR-7b-5p, miR-27b-3p, miR-665-5p, miR-590-3p, miR-3184-3p, miR-181c-5p, miR-142a-5p, miR-769-5p, miR-224-5p, miR-30a-3p, miR-2285j, miR-30e-3p, miR-874-5p, miR-129-5p, miR-4492, miR-190a-5p, miR-2331-3p, miR-377-3p, miR-129b-3p, miR-655, miR-450a-1-3p, miR-625-5p, miR-543-3p, miR-186-5p, miR-195a-3p, miR-486-3p, miR-377-5p, miR-324-3p, miR-210-5p, miR-26a-5p, miR-618, miR-2285p, miR-202-5p, miR-30d-3p, miR-18a-3p, miR-23b-3p, miR-23c, miR-1434-5p, miR-193b-5p, miR-218-1-3p, miR-34a-5p, miR-2284u, miR-148a-5p, miR-493-3p, miR-190b-5p, miR-2284j, miR-2447, novel\_82, miR-101-3p, miR-2285u, miR-7689-3p, miR-126b-5p, miR-211-5p, miR-2284g, miR-2319b, miR-4443, miR-3596, miR-381-3p, miR-140-5p, miR-221, miR-335-3p, miR-493-5p, miR-9-3p, miR-668-5p, miR-23a-3p, miR-2284b, miR-8485, miR-29b-1-5p, miR-199b-5p, miR-491-5p, miR-199b-3p, novel\_78, miR-330-3p, miR-455-3p, miR-148b-5p, miR-2459, miR-126a-5p, miR-191, miR-149-5p, miR-2284r, miR-183a-5p, miR-1388-5p, miR-378d, miR-30b-3p, miR-1343-5p, miR-1197-5p, miR-30b-3p, miR-330-5p, miR-296-5p, miR-2366, miR-1298-3p, miR-185-5p, miR-147a, miR-1343-3p, miR-30b-3p, miR-1343-5p, miR-214-3p, miR-466i-5p, miR-324-3p, miR-30c-2-3p, miR-3141, miR-185-3p, miR-326, miR-4532, miR-432-3p, miR-30c-1-3p, miR-28b, miR-654-3p, miR-432-3p, miR-183-5p, miR-127-3p, miR-1291, miR-129b-3p, miR-361-3p, miR-3141, miR-6535, miR-323a-5p, miR-323-5p, miR-3082-5p, miR-542-5p, miR-2285aa, miR-2355-5p, miR-574-5p, miR-30c-1-3p, miR-4726-5p, miR-128-1-5p, miR-331-3p, miR-665, miR-2433, miR-28c, miR-326-3p, novel\_101, miR-214, miR-1343-5p, miR-103a-2-5p, miR-214-3p, miR-431-5p, novel\_17, miR-1306-5p, miR-326, miR-185-3p, miR-2331-5p, miR-28b, miR-486-3p, miR-490-3p, miR-450b-5p, miR-7862, miR-484, miR-450c-3p, miR-1343-5p, miR-412-3p, miR-197-3p, miR-374b-3p, miR-330-5p, miR-412-5p, miR-134-3p, miR-151-5p, miR-450a-1-3p, miR-340-3p, miR-3955-5p, miR-6517, miR-1343-3p, miR-412, miR-431, miR-212-5p, miR-450b-3p, miR-128-1-5p, miR-874-5p, miR-4492, miR-486b-3p, miR-6123, miR-2433, miR-502-5p, miR-28c, miR-324-3p, miR-24-3p, miR-1307-3p, miR-326-3p, miR-6134, miR-1306-5p, miR-193a-5p, miR-214, miR-450a-1-3p, miR-1306, miR-129b-5p, miR-3596, miR-378g, miR-374c-3p, novel\_32, miR-151b, miR-1271

MED13L ENSOARGO(mediator

ACTN4 ENSOARGO( actinin,

MECP2 ENSOARGO( methyl C

miR-193b-3p, miR-17-3p, miR-211, miR-326-3p, miR-2284w, miR-2285m, miR-4324, miR-133a-5p, miR-20a-5p, let-7i, novel\_68, miR-320b, novel\_69, miR-411b-3p, miR-374c-3p, miR-320c, miR-150-5p, miR-376b-3p, miR-3065-5p, miR-3591-3p, miR-1291, miR-7975, miR-6395, let-7e-5p, miR-130b-5p, miR-668-3p, miR-363-5p, miR-2285r, miR-432-3p, miR-503-5p, miR-197-5p, miR-105-5p, novel\_51, miR-106a-5p, miR-17-5p, miR-196b-5p, miR-193a-3p, miR-133b-5p, miR-665, miR-26b-3p, miR-432-5p, miR-2284d, let-7g-5p, miR-134-3p, miR-503-5p, miR-185-5p, miR-149-5p, miR-20b, miR-432, miR-2113, miR-1843b-5p, miR-374b-3p, miR-138, miR-2284ab, miR-30b-3p, miR-188-5p, miR-2284v, miR-133a-3p, miR-93, miR-145-3p, miR-331-3p, miR-138-5p, miR-204-5p, miR-28-5p, miR-2285aa, miR-2355-5p, miR-215-5p, miR-324-5p, miR-488-3p, miR-2448-3p, miR-93-5p, miR-320a, miR-17-5p, miR-876-3p, miR-20b-5p, miR-1248, miR-485-5p, miR-3529-3p, miR-4286, let-7g, miR-1271-3p, miR-376b-3p, miR-125a-3p, let-7c-5p, miR-2898, miR-17-3p, let-7f-5p, miR-543-5p, miR-2411-5p, novel\_121, miR-196a-5p, miR-330-5p, let-7d, miR-105-2, miR-2447, miR-877-3p, miR-7705, miR-2285n, miR-2440, miR-107-5p, miR-499a-5p, miR-20a-3p, miR-7689-3p, miR-211-5p, miR-7977, miR-3596, miR-378g, let-7d-5p, miR-376d, miR-361-3p, miR-129b-5p, miR-376a-3p, miR-544-5p, let-7a-5p, miR-106a-5p, miR-652-5p, miR-376b, miR-320b, miR-326, miR-182-5p, miR-106b-5p, miR-1185-5p, miR-103a-2-5p, let-7e, novel\_4, miR-105-1, miR-222-5p, miR-147a, miR-376b-3p, miR-9788-3p, miR-2459, miR-421, miR-296-5p, miR-30b-3p, miR-2426, let-7b, miR-4510, miR-145a-3p, miR-6525, let-7b-5p, miR-338-3p, miR-6134, let-7f, miR-324-3p, miR-665, miR-17-3p, miR-664a, miR-129-5p, miR-487a-5p, miR-874-5p, miR-708-5p, miR-4492, miR-130b-5p, miR-545-3p, miR-21-3p, miR-182-5p, miR-102-5p, miR-102b-3p, miR-6130, miR-204-3p, let-7i, novel\_1, miR-22-5p, miR-147-5p, miR-6123, miR-2285f, miR-495-3p, miR-362-5p, miR-8095, miR-2285ab, miR-3065-5p, miR-7975, miR-544-5p, miR-139-5p, miR-329-5p, miR-378b, miR-541-5p, miR-2285u, miR-7857-3p, miR-677, miR-1185-2-3p, miR-181b-3p, miR-105-5p, miR-196b-5p, miR-466f-3p, miR-494-3p, miR-382, miR-101-5p, miR-33a-5p, miR-539-3p, miR-3962, miR-30b-3p, miR-30b-3p, miR-1388-5p, miR-101a-5p, miR-3120-5p, miR-133b-5p, miR-105-1, miR-181b-2-3p, miR-500-5p, miR-1185-3p, miR-2285j, miR-494-5p, miR-30e-3p, miR-324-3p, miR-30a-3p, miR-665, novel\_74, miR-487b-5p, miR-155-5p, miR-4492, miR-665-5p, miR-6525, miR-500b-5p, miR-362-5p, miR-3154, miR-487b-5p, miR-2312, miR-329b, miR-582-5p, miR-548o-3p, miR-2285aa, miR-141-3p, miR-582-5p, miR-139-5p, miR-155-5p, miR-2397-5p, miR-324-3p, miR-450a-2-3p, miR-200a-3p, miR-329a-5p, miR-30a-3p, miR-196a-5p, miR-23b-5p, miR-1434-5p, miR-105-2, miR-155-5p, miR-361-5p, miR-30d-3p, miR-487a-3p, miR-7859, miR-545-5p

miR-215-5p, miR-376a-5p, miR-2366, miR-301b-5p, miR-873a-5p, miR-125b-2-3p, miR-3071-5p, miR-145a-5p, miR-26a-2-3p, miR-1343-3p, miR-2285ad, miR-145b, miR-383-5p, miR-2459, miR-1185-3p, miR-9788-3p, miR-2285p, miR-2957, miR-487b-5p, miR-17-3p, miR-103a-2-5p, miR-494-3p, miR-3529-3p, miR-329a-5p, let-7f-2-3p, miR-3065-5p, miR-136-5p, miR-671-5p, miR-329-5p, miR-215-5p, miR-2483-3p, miR-192-5p, miR-1185-2-3p, miR-502-5p, novel\_87, miR-301a-5p, miR-107-5p, miR-2285y, miR-487b-5p, miR-17-3p, miR-6119-3p, miR-669a-3p, miR-3956-3p, miR-212-3p, novel\_60, miR-2285x, miR-17-3p, miR-452-5p, miR-495-3p, miR-2428, novel\_27  
 miR-16b, miR-296-3p, miR-326, miR-320b, miR-1343-5p, miR-199b-5p, miR-363-5p, miR-424-5p, miR-380-5p, miR-296-3p, miR-193a, miR-432-3p, miR-432-3p, miR-374b-3p, miR-450c-3p, miR-143-5p, miR-101c, miR-497-5p, miR-16b, miR-455-3p, miR-216a-3p, miR-134-3p, miR-185-5p, miR-425-3p, miR-16a, miR-34c, miR-15a, miR-2285t, miR-203b-5p, novel\_1, miR-452-5p, miR-3957-3p, miR-219b-3p, miR-199b-5p, miR-2428, miR-154a, miR-326-3p, miR-449a, miR-423-5p, miR-216a-3p, miR-199b-5p, miR-140-5p, miR-361-3p, miR-376b-5p, miR-195a-5p, miR-541-5p, miR-378b, miR-2319b, miR-320c, miR-3082-5p, miR-374c-3p, miR-34b, miR-378g, miR-30b-3p, miR-34b-5p, miR-2898, miR-320d, miR-2403, miR-4286, miR-2385-3p, miR-183-5p, miR-143-3p, miR-2285b, miR-2411, miR-29a-5p, miR-199a-5p, miR-376c-5p, miR-486-3p, miR-380-5p, miR-2478, miR-330-5p, miR-1343-5p, miR-2904, miR-193b-5p, miR-1246, miR-378d, miR-34a-5p, miR-128-3p, miR-142-3p, miR-4429, miR-885-3p, novel\_121, miR-450a-1-3p, miR-15a-5p, miR-2411-5p, miR-322-5p, miR-505-5p, miR-665, miR-5100, miR-486b-3p, miR-424-5p, miR-874-5p, miR-450b-3p, novel\_74, miR-16-5p, miR-4510, miR-3184-5p, miR-411, miR-376c-5p, miR-433-3p, miR-320a, miR-450a-1-3p, miR-2448-3p, novel\_99, miR-885-3p, miR-2318, miR-296-3p, miR-15b-5p, novel\_25, miR-199a-5p, miR-6130, miR-34c-5p, miR-27a-5p, miR-374c-3p

XRCC2 ENSOARGO(X-ray re:

LGALS4 ENSOARGO(lectin,

miR-3956-3p, novel\_60, miR-3059-5p, miR-2447, miR-181d-5p, miR-2284j, miR-877-3p, miR-219a-2-3p, miR-2440, novel\_82, miR-30b-5p, miR-335, miR-4726-5p, miR-3964, miR-20a-3p, miR-2284g, miR-211-5p, miR-499b-5p, miR-489, miR-3596, miR-25, miR-378g, miR-203-3p, let-7d-5p, miR-378j, miR-129b-5p, miR-504, miR-99b-5p, miR-96-5p, miR-335-3p, miR-382-3p, let-7a-5p, miR-33a-5p, miR-2284b, miR-199a-3p, let-7e, miR-214-3p, novel\_78, miR-105-1, miR-539-5p, miR-147a, miR-1298-3p, miR-2285e, miR-2459, miR-148b-5p, miR-9788-3p, miR-455-3p, miR-3962, miR-3120-5p, miR-2284aa, miR-3074-5p, miR-4510, let-7b, miR-214, miR-1271, miR-181c-5p, miR-338-3p, let-7b-5p, miR-122-5p, let-7f, miR-2285j, miR-324-3p, miR-219b-3p, miR-17-3p, miR-6516-3p, novel\_74, miR-4492, miR-504-5p, miR-221-5p, miR-21-3p, miR-216b-3p, miR-6130, miR-6516, let-7i-5p, miR-204-3p, novel\_25, miR-3613-5p, miR-2285c, miR-30d-5p, miR-30f, miR-345-5p, miR-1827, miR-186-5p, miR-543-3p, miR-130a-5p, miR-376a-5p, miR-2285i, novel\_17, miR-30b, miR-196a-3p, miR-345-3p, miR-324-3p, miR-466i-5p, miR-98-5p, miR-2284m, miR-2484, let-7k, miR-30d, miR-221-5p, miR-340-5p, miR-222-5p, miR-210-3p, miR-199a-3p, novel\_83, miR-1961, miR-30c-5p, miR-1197-5p, miR-188-3p, miR-5703, miR-378d, miR-148a-5p, miR-2284u, miR-133a-3p, miR-335-5p, miR-135a-2-3p, novel\_101, miR-29c-3p, miR-17-3p, miR-3957-3p, miR-211, miR-2428, novel\_27, miR-1247-3p, miR-502-5p, let-7i, miR-29a, miR-147-5p, miR-3074-5p, miR-7-1-3p, miR-29a-3p, novel\_69, miR-2404, miR-3065-5p, miR-376b-3p, miR-3591-3p, miR-21c, miR-3970, miR-2285k, miR-6516-3p, miR-135b-5p, let-7e-5p, miR-363-5p, miR-2284l, miR-432-3p, miR-432-3p, miR-345-5p, miR-7-5p, novel\_51, miR-2411-3p, miR-99a-5p, miR-105-5p, miR-196b-5p, miR-452-5p, miR-665, miR-185-5p, miR-124-3p, let-7g-5p, miR-2284d, miR-224-5p, miR-199a-3p, miR-125b, miR-2411-3p, miR-345-3p, miR-105-5p, miR-330-3p, miR-3955-3p, miR-378a-5p, miR-125a-5p, miR-6240, miR-495-5p, let-7a-2-3p, miR-29a-5p, miR-1290, miR-484, miR-345-3p, miR-188-3p, miR-412-3p, miR-300, miR-450b-5p, miR-1388-5p, let-7a-2-3p, miR-105-1, miR-330-3p, miR-409b, miR-2285ad, miR-376a-5p, miR-665, miR-412, miR-1298-3p, miR-3431, miR-129-1-3p, miR-199a-3p, miR-455-3p, miR-148b-5p, miR-6529b, miR-142b, miR-2285j, miR-2433, miR-218-5p, miR-2285n, miR-125b-5p, miR-2285y, miR-499a-5p, miR-129-2-3p, miR-2447, miR-224-5p, miR-381-3p, miR-361-3p, let-7g-3p, miR-450b-3p, let-7g-3p, miR-376a-2-5p, novel\_94, miR-2319b, miR-125a, miR-2355-5p, miR-877-5p, miR-204-3p, miR-6535, miR-144-3p, novel\_68, miR-221-5p, miR-320b, novel\_94, miR-1827, miR-2285c, miR-216a-3p, miR-24-3p, miR-219a-2-3p, miR-335-5p, miR-335, miR-656-5p, miR-129-5p, miR-669a-3p, miR-502-5p, miR-219b-3p, miR-144, miR-100-3p, miR-665, miR-210-3p, miR-2285g, miR-149-5p, miR-545-5p, novel\_121, miR-2285e, miR-377-5p, miR-33b-3p, miR-128-3p, miR-188-5p, miR-1197-5p, miR-450b-5p, miR-377-5p, miR-101b-3p, miR-760-3p, miR-221-5p, miR-219-3p, miR-324-3p, miR-185-3p, miR-136-3p

miR-1280b, miR-1280c-5p, miR-1280d, miR-1280e, miR-1280f-5p, miR-1280g-5p, miR-181a-5p, miR-1285, miR-1434-3p, miR-3071-5p, miR-2285g, miR-2284d, miR-2355-3p, miR-377-5p, miR-660, miR-455-5p, miR-197-5p, miR-130b-5p, miR-2483-5p, miR-363-5p, miR-1291, miR-195a-5p, miR-6395, miR-379-5p, miR-2387, miR-2285ab, miR-18a-3p, miR-2404, miR-6402, miR-15a, miR-16a, miR-24-3p, miR-211, miR-2428, novel\_27, miR-326-3p, novel\_120, miR-542-5p, miR-2285x, novel\_101, miR-300, miR-128-3p, miR-378h, miR-483-3p, miR-2411-5p, miR-24-2-5p, miR-181b-5p, miR-2898, miR-1260a, miR-339a, miR-30c-2-3p, miR-2478, miR-24-2-5p, miR-2284a, miR-490-3p, miR-3065-3p, miR-199a-5p, miR-4286, miR-671-5p, miR-485-5p, miR-7144-5p, miR-381-3p, miR-488-3p, miR-320a, miR-769, miR-2284n, miR-324-5p, miR-199a-5p, miR-615-5p, miR-138-5p, miR-486b-3p, miR-374b-3p, miR-204-5p, miR-34c-3p, miR-3969, miR-331-3p, miR-374a-3p, miR-378c, miR-1306-5p, miR-2426, miR-378c, miR-2284aa, miR-378b, miR-484, miR-30b-3p, miR-2285e, miR-409b, miR-3085-3p, miR-542-5p, miR-326, novel\_103, miR-1306-5p, miR-320b, miR-362-3p, miR-30c-1-3p, miR-4532, miR-193a, miR-424-5p, novel\_94, miR-877-3p, miR-199b-5p, miR-361-3p, miR-3082-5p, miR-378e, miR-20a-3p, miR-3064-5p, miR-7977, miR-374a-3p, miR-7134-3p, miR-2285n, miR-2285y, miR-769-5p, miR-371a-5p, miR-541-3p, miR-3059-5p, novel\_60, miR-181d-5p, miR-2285f, miR-4429, miR-378d, miR-362-3p, novel\_133, miR-140-3p, miR-1197-5p, miR-188-3p, miR-15a-5p, miR-3600, miR-760-3p, miR-2284m, miR-320d, miR-30b-3p, miR-221-5p, miR-542-5p, miR-185-3p, miR-2411, miR-5100, miR-2312, miR-132-5p, miR-155-5p, miR-877-5p, novel\_32, miR-204-3p, miR-660-5p, miR-221-5p, miR-378a-3p, miR-3065-3p, miR-155-5p, miR-664a, miR-424-5p, miR-320e, miR-324-3p, miR-378c, miR-16b, miR-2284x, miR-497-5p, miR-223-3p, miR-1843b-5p, miR-542-3p, miR-708-3p, miR-4286, miR-185-3p, novel\_42, miR-5126, miR-2300a-5p, miR-133a-3p

ECH1 ENSOARGO(enoyl Co. 497-5p, miR-223-3p, miR-1843b-5p, miR-542-3p, miR-708-3p, miR-133a-3p

SLC25A22 ENSOARGO(solute c. novel\_120, novel\_27, miR-107-5p, miR-4492, miR-154-3p, miR-130b-5p, miR-154a-3p, miR-487a-3p, miR-660-5p, miR-320c, miR-320a, miR-1248, miR-544-5p, miR-154b-3p, miR-130b-5p, miR-487a, miR-105-3p, miR-2432, miR-185-3p, miR-320b, miR-2285af, miR-660, miR-320d, miR-485-3p, miR-2284z, miR-487a-3p, miR-432-5p, miR-539-5p, miR-708-3p, miR-432, miR-2284aa, miR-4429, miR-299a-5p

LRBA ENSOARGO(LPS-resp. miR-1271, miR-2285i, miR-1260b, miR-4532, miR-1260a, miR-2433, miR-1306-5p, miR-1307-5p, miR-4726-5p, miR-615-5p, miR-544-3p, miR-1271-5p, miR-3431, novel\_116, miR-544b, miR-1306, miR-5703, miR-96-5p, miR-876-3p, miR-1260b, miR-941, miR-544a, miR-2285k, miR-744-5p

TSGA13 ENSOARGO(testis s. 544-3p, miR-1271-5p, miR-3431, novel\_116, miR-544b, miR-1306, miR-5703, miR-96-5p, miR-876-3p, miR-1260b, miR-941, miR-544a, miR-2285k, miR-744-5p

novel\_2b, miR-182-5p, miR-154a-3p, miR-216b-3p, miR-548o-3p, miR-660-5p, miR-378a-3p, miR-140-5p, miR-30c-1-3p, novel\_99, miR-186-5p, miR-1827, miR-543-3p, miR-154b-3p, miR-30f, miR-345-5p, let-7g-3p, miR-433-3p, miR-30d-5p, miR-2285c, miR-206-3p, miR-3074-2-3p, miR-3958-5p, miR-3074-5p, miR-129-2-3p, miR-590-3p, miR-378c, miR-539-5p, miR-129-5p, miR-451a, miR-219b-3p, miR-30a-3p, miR-324-3p, miR-30e-3p, miR-616-3p, miR-199a-3p, miR-200b, miR-23c, miR-383-5p, miR-23b-3p, miR-7859, miR-30d-3p, miR-212-5p, miR-106a, miR-548e-3p, miR-361-5p, miR-378d, miR-218-1-3p, miR-16-1-3p, miR-142-3p, miR-1197-5p, miR-1193, miR-378a-3p, miR-217-5p, miR-378i, miR-30c-5p, miR-486-3p, miR-130a-5p, miR-181b-1-3p, miR-29b-1-5p, miR-376a-5p, miR-421-5p, miR-195a-3p, miR-20a, miR-487a, miR-3653-3p, miR-760-3p, miR-202-5p, miR-106a, miR-92a-1-5p, miR-422a, miR-345-3p, miR-219b-5p, miR-30b, miR-1185-2-3p, miR-489, miR-3596, miR-378e, miR-499b-5p, miR-541-5p, miR-20a-3p, miR-877-3p, novel\_94, miR-335-3p, miR-136-5p, miR-668-5p, miR-129b-5p, miR-378j, miR-361-3p, miR-140-5p, miR-219a-2-3p, miR-8095, miR-361-3p, miR-877-3p, miR-452-5p, miR-2285f, miR-3956-3p, novel\_60, miR-154-3p, miR-335, miR-3958-3p, miR-107-5p, miR-2285y, miR-30b-5p, miR-218-5p, miR-1185-3p, miR-2285e, miR-216a-3p, miR-153, miR-222-5p, miR-181b-2-3p, miR-2300a-5p, miR-199b-3p, miR-378c, miR-758-3p, miR-1a-3p, miR-6529a, miR-378b, miR-484, miR-758-3p, miR-2310, miR-491-3p, miR-378d, miR-30c-1-3p, miR-652-5p, let-7c-3p, miR-23a-3p, miR-106a-5p, miR-127-3p, miR-103a-2-5p, miR-153-3p, miR-182-5p, miR-29b-1-5p, miR-199a-3p, miR-2284n, miR-331-5p, miR-1271, miR-487a-3p, miR-1814c, miR-7144-5p, miR-20b-5p, miR-376c-5p, miR-345-5p, miR-10b-3p, miR-376c-5p, miR-17-5p, miR-23b, miR-137-3p, miR-93-5p, miR-503-3p, miR-30a-5p, miR-378c, miR-145-3p, miR-93, miR-

miR-493-5p, miR-6240, miR-2285r, miR-432-3p, novel\_51, miR-483-3p, miR-103a-3p, miR-134-3p, miR-542-3p, novel\_23, miR-16b, miR-497-5p, miR-335-5p, miR-29c-3p, miR-576-3p, miR-28c, miR-29a, miR-421-5p, miR-625-3p, miR-3074-5p, miR-329-5p, miR-411b-3p, miR-320c, miR-669, miR-148a-3p, miR-3065-5p, miR-216a-3p, miR-150-5p, miR-378f, miR-2319a, miR-3064-5p, miR-2285b, miR-2284y, miR-219-3p, miR-205-5p, miR-3071-3p, miR-127-5p, miR-28-3p, miR-152-3p, miR-200a-3p, novel\_96, miR-6517, miR-2285ad, miR-1224-5p, miR-9-5p, miR-322-5p, novel\_121, miR-486-5p, miR-2284z, miR-3591-5p, miR-1343-5p, miR-155-5p, miR-2284v, miR-28a-3p, miR-16-5p, miR-193a-5p, miR-2284k, novel\_9, miR-3068-3p, miR-2285aa, miR-2355-5p, miR-542-5p, miR-223-5p, miR-301, miR-23b, miR-137-3p, miR-93-5p, miR-767, miR-876-3p, miR-20b-5p, miR-2284b, miR-23a-3p, miR-378d, miR-8485, miR-199a-3p, miR-16b, miR-106b-5p, miR-323b-3p, miR-487b-5p, miR-491-5p, miR-153-3p, miR-330-3p, novel\_78, miR-1343-3p, miR-147a, miR-153, miR-455-3p, miR-2284r, miR-323b, miR-1388-5p, miR-2284j, miR-9-5p, miR-877-3p, miR-7705, miR-2440, miR-218-5p, miR-628-3p, miR-499a-5p, miR-490-5p, miR-2319b, miR-2284g, miR-2285u, miR-2483-3p, miR-378g, miR-203-3p, miR-221, miR-381-3p, miR-668-5p, miR-504, miR-136-5p, miR-9-3p, miR-493-5p, miR-329a-5p, miR-143-3p, miR-486-3p, miR-422a, miR-324-3p, miR-202-5p, miR-2484, miR-106a, miR-23c, miR-7859, miR-23b-3p, miR-328-3p, miR-2284h-5p, miR-378i, miR-378a-3p, miR-142-3p, miR-33b-3p, miR-2284u, miR-3074-5p, miR-6525, miR-15b-3p, miR-3604, miR-219b-3p, novel\_74, miR-129-5p, miR-1277-3p, miR-504-5p, miR-2331-3p, miR-30c-1-3p, miR-582-5p, miR-15b-5p, miR-299, miR-411, miR-186-5p, miR-654-3p, miR-17-5p, miR-106a-5p, miR-330-3p, miR-466f-3p, miR-660, miR-1343-5p, miR-133b-5p, miR-665, miR-185-5p, miR-2284d, miR-20b, miR-103, miR-6238, miR-

miR-222-3p, miR-320e, miR-3604, miR-17-3p, miR-451a, miR-208b-5p, miR-224-5p, miR-18a-5p, let-7g-3p, novel\_99, miR-625-5p, miR-548o-3p, miR-3065-3p, miR-544-3p, miR-192-5p, miR-106a, miR-320d, miR-34b-5p, miR-2285w, miR-329a-5p, miR-345-3p, miR-20a, miR-2432, miR-215-5p, miR-217-5p, miR-4429, novel\_73, miR-34a-5p, miR-106a, miR-548e-3p, miR-7859, miR-2284h-5p, miR-2440, miR-2285n, miR-3968, miR-3956-3p, novel\_60, novel\_111, miR-199b-5p, miR-221, miR-361-3p, miR-126b-5p, miR-2285u, miR-454-5p, novel\_103, miR-320b, miR-342, miR-106b-5p, miR-182-5p, miR-199b-5p, miR-106a-5p, miR-382-3p, let-7c-3p, miR-2310, miR-758-3p, miR-758-3p, miR-7857, miR-2426, miR-544a, miR-199b-3p, novel\_4, miR-222-5p, miR-181b-2-3p, miR-221-3p, miR-29b-3p, miR-100-3p, miR-28a-3p, miR-3607-3p, miR-93, miR-365a-5p, miR-18a, miR-376c-5p, miR-3154, miR-17-5p, miR-320a, miR-93-5p, miR-1814c, miR-376c-5p, miR-20b-5p, miR-215-5p, miR-365a-3p, miR-34c-5p, miR-374c-3p, miR-199a-5p, miR-205-5p, miR-217, miR-127-5p, miR-17-3p, miR-28-3p, miR-3529-3p, miR-4286, miR-199a-5p, miR-3065-3p, miR-1290, miR-29d-3p, miR-222, miR-18b-5p, miR-483-3p, miR-20a-5p, novel\_87, miR-34c, novel\_1, miR-29a, miR-199c, miR-421-5p, novel\_120, miR-219b-3p, miR-342-3p, miR-17-3p, miR-29c-3p, miR-323c, miR-199b-5p, miR-449a, novel\_27, miR-18b, miR-376b-5p, miR-2319a, miR-329-5p, miR-34b, miR-374c-3p, miR-670-3p, miR-29a-3p, miR-320c, miR-677, miR-7-5p, miR-224-5p, miR-17-5p, miR-106a-5p, miR-365b-5p, miR-483-3p, miR-378a-5p, miR-542-3p, miR-7b-5p, novel\_23, miR-374b-3p, miR-29b, miR-31-5p, miR-20b



novel\_68, miR-320b, miR-2404, miR-323a-5p, miR-34b, miR-669, miR-144-3p, miR-376b-5p, miR-18a-3p, miR-216a-3p, miR-378b, miR-146b-5p, miR-9851-3p, miR-335-5p, miR-2285x, miR-495-3p, miR-1193, miR-24-3p, miR-449a, novel\_27, miR-2428, miR-2284w, miR-576-3p, miR-34c, miR-502b, miR-31-5p, miR-3535, miR-412-5p, miR-185-5p, miR-503-5p, miR-194-3p, miR-2355-3p, miR-2113, miR-450c-3p, miR-197-3p, miR-380-3p, miR-16-1-3p, miR-7862, miR-6240, miR-363-5p, miR-2285r, miR-503-3p, miR-503-5p, miR-146a, miR-105-5p, miR-190a, miR-330-3p, miR-2331-5p, novel\_51, miR-2411-3p, miR-1343-5p, miR-466f-3p, miR-874-3p, miR-34c-5p, miR-488-3p, miR-200a-5p, miR-376c-5p, miR-3154, miR-23b, miR-10b-3p, miR-329a, miR-7144-5p, miR-376c-5p, miR-23a-5p, miR-671-5p, miR-1814c, miR-1306-5p, miR-6128, miR-193a-5p, miR-1197-3p, miR-2433, miR-370-5p, miR-6740-5p, miR-486b-3p, miR-412, miR-302a-5p, miR-450a-1-3p, miR-345-3p, miR-615-3p, miR-3578, miR-1343-5p, miR-128-3p, miR-105-2, miR-3064-5p, miR-495-5p, miR-30a-3p, miR-181a-2-3p, miR-3065-3p, novel\_39, miR-29a-5p, miR-6119-5p, miR-125a-3p, miR-2898, novel\_96, novel\_127, miR-3064-5p, miR-10b, miR-452-3p, miR-499b-5p, miR-25, miR-203-3p, miR-4443, miR-409-5p, miR-378j, miR-668-5p, miR-2447, miR-541-3p, miR-190b-5p, miR-361-3p, miR-423-5p, miR-382-3p, novel\_82, miR-101-3p, miR-615, miR-2440, miR-301a-5p, miR-4726-5p, miR-628-3p, miR-335, miR-490-5p, miR-105-1, miR-2300a-5p, miR-151a-3p, miR-330-3p, miR-1343-3p, miR-147a, miR-9788-3p, miR-216a-3p, miR-296-5p, miR-329-3p, miR-541, miR-301b-5p, miR-412-3p, miR-362-3p, miR-1388-5p, miR-450b-5p, miR-2426, miR-101c, miR-574-3p, miR-1388-3p, miR-23a-3p, miR-652-5p, miR-4532, miR-2310, miR-362-3p, miR-491-5p, novel\_124, miR-3085-3p, miR-3955-3p, miR-146b, miR-214-3p, miR-2285c, miR-2331-3p, miR-3065-3p, miR-370-5p, miR-216b-

miR-34b-5p, miR-1827, miR-625-5p, miR-500a-3p, miR-129b-3p, miR-377-3p, miR-376e-3p, miR-499b-3p, miR-2284s, miR-32-5p, miR-296-3p, miR-130b-5p, miR-1468-5p, miR-500, miR-129-5p, miR-664a-5p, miR-665, miR-151-3p, miR-769-5p, miR-6525, miR-3184-5p, miR-129-2-3p, miR-3074-5p, miR-665-5p, miR-33b-3p, miR-16-1-3p, miR-193b-5p, miR-217-5p, miR-23c, miR-23b-3p, miR-106a, miR-18a-3p, miR-212-5p, miR-202-5p, miR-210-5p, miR-92a-1-5p, miR-345-3p, miR-324-3p, miR-181b-1-3p, miR-376c-3p, miR-376a-5p, miR-143-3p, miR-486-3p, miR-329a-5p, miR-345-3p, miR-136-5p, miR-299b-5p, miR-1983, miR-1306-3p, miR-25, miR-378g, miR-499a-3p, miR-4792, miR-211-5p, miR-7689-3p, miR-490-5p, novel\_82, miR-218-5p, miR-361-3p, miR-877-3p, miR-423-5p, miR-363-3p, miR-3956-3p, miR-1388-5p, miR-2284r, miR-758-3p, miR-147a, miR-1298-3p, miR-1343-3p, novel\_78, miR-145b, miR-181b-2-3p, miR-491-5p, miR-103a-2-5p, miR-199b-5p, miR-146b, miR-106b-5p, miR-29b-1-5p, novel\_19, miR-1388-3p, miR-23a-3p, miR-345-5p, miR-767, miR-20b-5p, miR-23b, miR-93-5p, miR-25-3p, miR-376c-3p, miR-874-3p, miR-1271, miR-2285aa, novel\_63, miR-1290, miR-330-5p, miR-505-5p, miR-129-1-3p, novel\_121, miR-6517, miR-2285ad, miR-299a-3p, miR-1a-2-5p, novel\_96, novel\_127, miR-125a-3p, miR-205-5p, miR-92b-3p, miR-148b-5p, novel\_39, miR-412-3p, miR-146b-5p, miR-3591-3p, miR-216a-3p, miR-3065-5p, miR-1306, miR-299b-3p, miR-411b-3p, miR-181b-3p, miR-677, miR-329-5p, miR-3074-5p, novel\_68, miR-576-3p, miR-4324, novel\_87, miR-199b-5p, miR-1a-1-5p, miR-193b-3p, miR-1839-3p, miR-16-1-3p, miR-188-5p, miR-26a-2-3p, miR-542-3p, miR-708-3p, miR-450c-3p, miR-134-3p, miR-3431, miR-412-5p, miR-149-5p, miR-194-3p, miR-483-3p, miR-193a-3p, miR-296-3p, miR-377-3p, miR-146a, novel\_51, miR-2411-3p, miR-32, miR-365b-5p, miR-2285r, miR-668-3p, miR-3613-5p, miR-193b-3p, miR-5100, miR-2300a-5p  
miR-30d, miR-107, miR-21-3p, miR-103a-2-5p, miR-324-3p, miR-16b, miR-30b, miR-2285b, miR-380-5p, miR-1388-3p, miR-380-5p, miR-424-5p, miR-497-5p, miR-30c, miR-101c, miR-16b, miR-23b-5p, miR-30a-5p, miR-30c-5p, miR-103, miR-322-5p, miR-15a-5p, miR-103a-3p, miR-424-5p, miR-16a, miR-135a-5p, miR-107-5p, miR-15a, miR-30b-5p, miR-502-5p, miR-1197-3p, miR-16-5p, miR-135b-5p, miR-195a-5p, miR-450b-3p, miR-107, miR-30f, miR-30d-5p, miR-21a-3p, miR-30e-5p, miR-2448-3p, miR-15b-5p, miR-3120-3p  
miR-2284z, miR-378h, miR-128-3p, miR-2284u, miR-885-3p, miR-2904, miR-1343-5p, miR-5703, miR-140-3p, miR-378a-3p, miR-378i, miR-2284y, miR-486-3p, miR-2284a, miR-130a-5p, miR-183-5p, miR-28-3p, miR-2284m, miR-122-3p, miR-422a, novel\_17, miR-3957, miR-2284n, miR-370-3p, miR-1271, miR-378a-3p, miR-3957-5p, miR-885-3p, novel\_99, miR-378c, miR-28a-3p, miR-378c, miR-2284v, miR-486b-3p, miR-2284k, miR-216a-3p, miR-455-3p, miR-2284d, miR-1298-3p, novel\_4, miR-2284aa, miR-2284x, miR-2284ab, miR-378c, miR-197-3p, miR-378b, miR-4532, miR-378d, miR-628-5p, miR-2284b, miR-382-3p, miR-1343-5p, miR-505, miR-1306-5p, miR-378e, miR-411b-3p, miR-2284g, miR-378f, miR-150-5p, miR-1306, miR-216a-3p, miR-409-5p, miR-2284j, novel\_60, miR-3956-3p

miR-1434-5p, miR-5703, miR-217-5p, miR-2300b-3p, miR-34a-5p, novel\_73, miR-19b-3p, miR-30d-3p, miR-18a-3p, miR-328-3p, miR-200b, miR-23c, miR-148b-3p, miR-23b-3p, miR-185-3p, miR-196a-3p, miR-299-3p, miR-3653-3p, miR-34b-5p, miR-30b-3p, miR-202-5p, miR-195a-3p, miR-329a-5p, miR-2411, miR-486-3p, miR-146a-5p, miR-130a-5p, miR-181b-1-3p, miR-376a-5p, novel\_99, miR-1827, miR-625-5p, miR-3065-3p, miR-140-5p, novel\_32, miR-301a-3p, miR-10a, miR-30a-3p, miR-30e-3p, miR-454-3p, miR-208b-5p, miR-451a, miR-425-5p, miR-433-5p, miR-539-5p, miR-181c-5p, miR-346, miR-10b-5p, miR-6525, miR-3962, miR-30b-3p, miR-10b, miR-541, miR-6529a, miR-222-5p, miR-181b-2-3p, miR-5010-3p, miR-455-3p, miR-147a, miR-376b-3p, miR-153, miR-2957, miR-431-5p, miR-146b, miR-153-3p, miR-130b-3p, miR-23a-3p, miR-382-3p, miR-381-3p, miR-129b-5p, miR-140-5p, novel\_94, miR-335-3p, miR-376a-3p, miR-493-5p, miR-668-5p, miR-20a-3p, miR-10b, miR-376d, miR-144-5p, miR-7857-3p, miR-2440, miR-218-5p, miR-3958-3p, miR-4726-5p, miR-181d-5p, miR-541-3p, miR-877-3p, miR-23b-5p, miR-29d-3p, miR-1290, miR-196a-5p, miR-10a-5p, miR-200b-3p, miR-300, miR-376a-5p, miR-431, miR-429-3p, miR-299a-3p, novel\_121, miR-545-5p, miR-2411-5p, miR-217, miR-3071-3p, miR-125a-3p, miR-200c, miR-376b-3p, novel\_127, miR-181b-5p, miR-200c-3p, miR-450a-2-3p, miR-30a-3p, miR-490-3p, miR-3065-3p, miR-23b, miR-3154, miR-381-3p, miR-671-5p, miR-485-5p, miR-2318, miR-876-3p, miR-10b-3p, miR-2285aa, miR-370-3p, miR-34c-5p, miR-3969, miR-29b-3p, miR-486b-3p, miR-138-5p, miR-144-5p, miR-193a-5p, miR-6128, miR-374b-3p, novel\_23, miR-3071-5p, miR-181a-5p, miR-7862, miR-29b, miR-138, miR-30b-3p, miR-665, miR-130a-3p, miR-31-5p, miR-340-3p, miR-194-3p, miR-185-5p, miR-146a, miR-196b-5p, miR-493-5p, miR-503-3p, miR-432-3p, miR-2285r, miR-432-3p, miR-376b-3p, miR-18a-3p, miR-148a-3p, miR-

miR-2284y, miR-29a-5p, let-7g, miR-92b-3p, miR-3064-5p, let-7f-5p, novel\_121, miR-450a-1-3p, miR-2284z, miR-9-5p, miR-505-5p, miR-322-5p, miR-431, miR-2285ad, miR-23b-5p, miR-1343-5p, miR-3591-5p, miR-196a-5p, miR-16-5p, miR-592, miR-3432a, miR-6740-5p, miR-2433, miR-25-3p, miR-2355-5p, miR-574-5p, miR-20b-5p, miR-345-5p, miR-329a, miR-93-5p, let-7a-2-3p, miR-668-3p, miR-6240, miR-493-5p, miR-193a-3p, miR-196b-5p, miR-378a-5p, miR-483-3p, novel\_51, miR-194a, miR-32, miR-3141, miR-377-3p, miR-146a, miR-149-5p, miR-31-5p, miR-369-5p, miR-497-5p, miR-16b, miR-197-3p, miR-450c-3p, miR-22-3p, miR-432, miR-193b-3p, miR-335-5p, miR-28c, miR-4324, novel\_69, miR-329-5p, miR-378f, let-7e-5p, miR-146b-5p, miR-1306, miR-150-5p, miR-3141, miR-329a-5p, let-7k, miR-98-5p, miR-422a, miR-324-3p, miR-210-5p, miR-328-3p, miR-2284h-5p, miR-212-5p, miR-106a, miR-2284u, miR-218-1-3p, miR-33b-3p, miR-378a-3p, miR-1961, miR-378i, miR-122-5p, novel\_44, miR-346, miR-214, let-7b, miR-129-5p, miR-151-3p, let-7f, miR-15b-5p, miR-151b, let-7i-5p, miR-377-3p, miR-2284s, miR-10a, miR-2331-3p, miR-32-5p, miR-504-5p, miR-1827, miR-345-5p, miR-129b-3p, miR-450a-1-3p, miR-8485, miR-378d, miR-2284b, miR-1388-3p, miR-214-3p, miR-146b, miR-106b-5p, miR-16b, miR-431-5p, miR-455-3p, miR-147a, miR-330-3p, novel\_78, miR-362-3p, miR-2284r, miR-329-3p, miR-361-3p, miR-363-3p, miR-1843a-3p, miR-2440, miR-218-5p, novel\_82, miR-4443, miR-25, miR-3596, miR-2284g, miR-493-5p, miR-504, miR-99b-5p, miR-96-5p, miR-3065-3p, miR-28b, miR-4286, miR-181a-2-3p, miR-92a-3p, miR-543-5p, miR-2898, miR-17-3p, let-7c-5p, miR-99a, miR-214-5p, miR-483-3p, miR-1271-5p, miR-378h, let-7a-2-3p, miR-10a-5p, miR-99a-5p, let-7d, miR-378c, miR-93, miR-103b, miR-28-5p, miR-410-3p, miR-370-5p, miR-410-5p, novel\_48, miR-100-5p, miR-17-5p, miR-345-5p, miR-1242, miR-532-3p, miR-1260b, miR-1260b, miR-877-3p, miR-361-3p, miR-1260a, miR-130b-5p, novel\_39, miR-1306-5p, miR-125b, miR-324-3p, miR-760-3p, miR-491-5p, novel\_96, miR-125a-5p, miR-106b-3p, miR-6516-5p, miR-147a, miR-214-5p, miR-149-5p, novel\_83, miR-2408, miR-296-5p, miR-378d, miR-361-3p, miR-338-3p, miR-2285j, miR-2433, miR-218-5p, miR-125b-5p, miR-664a, miR-130b-5p, novel\_68, miR-7977, miR-125a, miR-6516, miR-1306, miR-329b, miR-543-3p

miR-664a, miR-138-5p, miR-874-5p, miR-320e, miR-125b-5p, miR-331-3p, miR-1197-3p, miR-6134, miR-3184-5p, miR-3074-5p, miR-129-2-3p, miR-4510, let-7g-3p, miR-18a-5p, let-7g-3p, miR-485-5p, miR-1827, miR-671-5p, miR-301, miR-488-3p, miR-18a, miR-193b-3p, miR-6130, miR-2284s, miR-544-3p, novel\_32, miR-2331-3p, miR-125a, miR-2355-5p, novel\_96, miR-125b, miR-185-3p, miR-1271-3p, novel\_39, miR-345-3p, miR-2887, miR-4286, miR-3064-5p, let-7a-2-3p, miR-2366, miR-615-3p, miR-330-5p, miR-1197-5p, miR-129-1-3p, miR-6517, miR-2285ad, miR-18b-5p, miR-4726-5p, miR-6123, miR-615, miR-2285n, miR-301a-5p, miR-2285y, miR-24-3p, miR-361-3p, miR-326-3p, miR-423-5p, miR-3956-3p, novel\_101, miR-193b-3p, novel\_94, miR-18b, miR-361-3p, miR-2483-3p, miR-2404, miR-146b-3p, miR-378g, miR-4443, miR-669, miR-3074-5p, miR-3064-5p, miR-2285u, miR-25-5p, novel\_124, miR-3085-3p, miR-491-5p, miR-193a-3p, miR-125a-5p, miR-326, miR-5126, let-7a-2-3p, miR-4532, miR-544a, miR-219a-1-3p, miR-138, miR-301b-5p, miR-2284r, miR-185-5p, miR-134-3p, miR-149-5p, miR-9788-3p, miR-194-3p, novel\_4, novel\_78, miR-1343-3p, miR-133b-5p, miR-2300a-5p, miR-148b-5p, miR-219-3p, miR-125a-3p, miR-200a-3p, novel\_127, miR-127-5p, novel\_79, miR-1224-5p, miR-412, miR-429-3p, miR-2284z, miR-758-5p, miR-9-5p, miR-1290, miR-3591-5p, miR-155-5p, miR-193a-5p, miR-494-5p, miR-592, novel\_9, miR-2355-5p, miR-874-3p, miR-503-3p, miR-376c-5p, miR-93-5p, miR-301, miR-20b-5p, miR-329b, miR-345-5p, miR-876-3p, miR-628-5p, miR-668-3p, miR-493-5p, miR-503-3p, miR-2285r, miR-377-3p, miR-483-3p, miR-339-5p, miR-31-5p, novel\_116, miR-3431, miR-134-3p, miR-22-3p, miR-542-3p, miR-2284x, miR-16-1-3p, miR-335-5p, miR-2284o, miR-142b, miR-576-3p, miR-4324, miR-3120-3p, miR-181b-3p, miR-144-3p, miR-6535, miR-677, miR-374c-3p, miR-3591-3p, miR-150-5p, miR-376b-5p, miR-378f, miR-2319a, miR-345-3p, miR-369-3p, miR-195a-3p, miR-376a-5p, miR-92a-1-5p, miR-422a, miR-212-5p, miR-30d-3p, miR-106a, miR-18a-3p, miR-1434-5p, miR-378a-3p, miR-217-5p, miR-378i, miR-148a-5p, miR-16-1-3p, miR-214, miR-665, miR-219b-3p, miR-30a-3p, miR-30e-3p, miR-2285j, miR-4492, novel\_74, miR-296-3p, miR-216b-3p, miR-504-5p, miR-377-3p, miR-487b-5p, miR-433-3p, miR-129b-3p, miR-625-5p, miR-339b, miR-345-5p, miR-2310, miR-378d, miR-182-5p, miR-106b-5p, miR-29b-1-5p, miR-214-3p, miR-1185-5p, miR-181b-2-3p, miR-145b, miR-1343-3p, novel\_78, miR-2459, miR-421, miR-148b-5p, miR-455-3p, miR-539-5p, miR-147a, miR-758-3p, miR-501-3p, miR-301b-5p, miR-2284r, miR-1839-5p, miR-9-5p, miR-885-5p, miR-2447, miR-7705, miR-1285-5p, miR-877-3p, miR-301a-5p, miR-499a-5p, miR-7689-3p, miR-2319b, miR-24-1-5p, miR-139-5p, miR-500-3p, miR-203-3p, miR-2483-3p, miR-378g, miR-3596, miR-381-3p, miR-378j, miR-544-5p, miR-493-5p, miR-504, miR-136-5p, miR-181a-2-3p, miR-29b-2-5p, miR-30a-3p, miR-1271-3p, miR-376c-5p, miR-376b-5p, miR-24-2-5p, miR-217, miR-339a, miR-200c, miR-191-3p, miR-200c-3p, miR-17-3p, miR-450a-2-3p, miR-483-3p, miR-378h, miR-501-

TRMT61A ENSOARGOC tRNA met

SEPHS1 ENSOARGOC selenoph

miR-2411-5p, miR-30a-5p, miR-34b-3p, miR-3578, miR-134, let-7d, miR-181a-2-3p, miR-3529-3p, miR-199a-5p, miR-380-5p, miR-28b, miR-181c-3p, miR-217, let-7c-5p, miR-1260a, miR-107, miR-92a-3p, miR-141-3p, miR-3957-5p, miR-487a-3p, miR-199a-5p, miR-154b-5p, miR-3957, miR-34c-5p, miR-17-5p, miR-320a, miR-2448-3p, novel\_48, miR-485-5p, miR-10b-3p, miR-3607-3p, miR-365a-5p, miR-93, miR-374a-3p, miR-135a-1-3p, miR-28-5p, miR-374b-3p, miR-486b-3p, miR-544b, miR-103, miR-20b, miR-2355-3p, let-7g-5p, miR-145a-5p, miR-873a-5p, miR-455-5p, miR-30b-3p, miR-1260b, miR-219a-1-3p, miR-382, miR-130b-5p, miR-539-3p, miR-330-3p, miR-190a, miR-106a-5p, miR-455-5p, miR-17-5p, miR-224-5p, miR-452-5p, miR-320b, miR-378b, miR-670-3p, miR-34b, miR-378b, miR-505-3p, miR-195a-5p, miR-450b-3p, miR-107, miR-219b-3p, miR-449a, miR-326-3p, miR-2428, miR-24-3p, miR-16a, miR-34c, let-7i, miR-382-5p, miR-15a, miR-20a-5p, miR-22-5p, miR-199c, miR-147-5p, miR-92a-3p, novel\_1, miR-505-3p, miR-485-3p, miR-487a-3p, miR-222-5p, miR-15a-5p, miR-188-3p, miR-5703, novel\_133, miR-2300b-3p, miR-1246, miR-376a-5p, miR-4429, miR-20a, miR-216c-5p, miR-2411, miR-130a-5p, miR-216a-5p, miR-30d, miR-34b-5p, miR-21-3p, miR-299-3p, miR-320d, miR-106a, miR-466i-5p, miR-21-3p, miR-32-3p, miR-544-3p, miR-139-5p, miR-21a-3p, novel\_99, miR-30f, miR-154b-3p, miR-539-5p, let-7b-5p, miR-324-3p, miR-320e, miR-708-5p, miR-424-5p, miR-664a, miR-409b, novel\_4, miR-9788-3p, miR-30b-3p, miR-6529a, miR-143-5p, miR-544a, miR-33a-5p, let-7a-5p, miR-424-5p, miR-106a-5p, miR-193a, miR-758-3p, miR-320b, novel\_115, miR-326, miR-1306-5p, let-7e, miR-25-5p, miR-664b, miR-20a-3p, let-7d-5p, miR-7857-3p, miR-489, miR-3082-5p, miR-129b-5p, miR-361-3p, miR-199b-5p, miR-3059-5p, miR-32-3p, miR-212-3p, miR-9-3p, miR-382-3p, miR-374a-3p, miR-2285ad, miR-299a-3p, miR-124-5p, miR-222-5p, miR-230-5p, miR-206-3p, miR-346, miR-654-3p, miR-541-3p, miR-495-5p, miR-206, miR-2284q, miR-1468, miR-1468-5p, miR-1343-5p, novel\_87, miR-489, miR-328-3p, miR-548o-3p, miR-320b, miR-1291, miR-485-5p, miR-6395, miR-541, miR-3578, miR-140-5p, miR-1343-5p, miR-224-5p, miR-211, novel\_27, miR-541-3p, miR-3059-5p, miR-9-5p, miR-3607-3p, miR-4726-5p, miR-204-5p, miR-486b-3p, miR-28-5p, miR-708-5p, miR-421-5p, miR-331-3p, miR-139-5p, miR-2404, miR-2284s, miR-133c, miR-139-5p, miR-211-5p, miR-320b, miR-186-5p, miR-1895, miR-3065-5p, miR-129b-3p, miR-377-5p, miR-192-3p, miR-1957a, miR-4532, miR-486-3p, miR-216c-5p, miR-124a, let-7c-3p, miR-760-3p, miR-191-3p, miR-196a-3p, miR-224-5p, miR-185-3p, novel\_51, miR-2331-5p, miR-105-5p, miR-7859, miR-9-5p, miR-455-3p, miR-194-3p, miR-105-1, miR-548e-3p, miR-377-5p, miR-16-1-3p, miR-30b-3p, miR-188-5p, miR-105-2, miR-16-1-3p, miR-541, miR-125b-2-3p, novel\_23, miR-30b-3p, miR-124-3p, miR-2904, miR-181a-5p, miR-493-3p, novel\_9, miR-181b-5p, miR-466i-5p, miR-345-5p, miR-345-5p, miR-450a-5p, miR-1248, miR-2355-5p, miR-1298-3p, novel\_69, novel\_27, miR-450c-5p, miR-345-5p

CCDC178 ENSOARGO(coiled-coiled) 5p, miR-22-5p, miR-199c, miR-147-5p, miR-92a-3p, novel\_1, miR-505-3p, miR-485-3p, miR-487a-3p, miR-222-5p, miR-15a-5p, miR-188-3p, miR-5703, novel\_133, miR-2300b-3p, miR-1246, miR-376a-5p, miR-4429, miR-20a, miR-216c-5p, miR-2411, miR-130a-5p, miR-216a-5p, miR-30d, miR-34b-5p, miR-21-3p, miR-299-3p, miR-320d, miR-106a, miR-466i-5p, miR-21-3p, miR-32-3p, miR-544-3p, miR-139-5p, miR-21a-3p, novel\_99, miR-30f, miR-154b-3p, miR-539-5p, let-7b-5p, miR-324-3p, miR-320e, miR-708-5p, miR-424-5p, miR-664a, miR-409b, novel\_4, miR-9788-3p, miR-30b-3p, miR-6529a, miR-143-5p, miR-544a, miR-33a-5p, let-7a-5p, miR-424-5p, miR-106a-5p, miR-193a, miR-758-3p, miR-320b, novel\_115, miR-326, miR-1306-5p, let-7e, miR-25-5p, miR-664b, miR-20a-3p, let-7d-5p, miR-7857-3p, miR-489, miR-3082-5p, miR-129b-5p, miR-361-3p, miR-199b-5p, miR-3059-5p, miR-32-3p, miR-212-3p, miR-9-3p, miR-382-3p, miR-374a-3p, miR-2285ad, miR-299a-3p, miR-124-5p, miR-222-5p, miR-230-5p, miR-206-3p, miR-346, miR-654-3p, miR-541-3p, miR-495-5p, miR-206, miR-2284q, miR-1468, miR-1468-5p, miR-1343-5p

MAN1C1 ENSOARGO(mannosidase) 5p, novel\_87, miR-489, miR-328-3p, miR-548o-3p, miR-320b, miR-1291, miR-485-5p, miR-6395, miR-541, miR-3578, miR-140-5p, miR-1343-5p, miR-224-5p, miR-211, novel\_27, miR-541-3p, miR-3059-5p, miR-9-5p, miR-3607-3p, miR-4726-5p, miR-204-5p, miR-486b-3p, miR-28-5p, miR-708-5p, miR-421-5p, miR-331-3p, miR-139-5p, miR-2404, miR-2284s, miR-133c, miR-139-5p, miR-211-5p, miR-320b, miR-186-5p, miR-1895, miR-3065-5p, miR-129b-3p, miR-377-5p, miR-192-3p, miR-1957a, miR-4532, miR-486-3p, miR-216c-5p, miR-124a, let-7c-3p, miR-760-3p, miR-191-3p, miR-196a-3p, miR-224-5p, miR-185-3p, novel\_51, miR-2331-5p, miR-105-5p, miR-7859, miR-9-5p, miR-455-3p, miR-194-3p, miR-105-1, miR-548e-3p, miR-377-5p, miR-16-1-3p, miR-30b-3p, miR-188-5p, miR-105-2, miR-16-1-3p, miR-541, miR-125b-2-3p, novel\_23, miR-30b-3p, miR-124-3p, miR-2904

NUBP1 ENSOARGO(nucleotide) 5p, miR-181a-5p, miR-493-3p, novel\_9, miR-181b-5p, miR-466i-5p, miR-345-5p, miR-345-5p, miR-450a-5p, miR-1248, miR-2355-5p, miR-1298-3p, novel\_69, novel\_27, miR-450c-5p, miR-345-5p

FIGN ENSOARGO(fidgetin) 5p, miR-345-5p, miR-345-5p, miR-450a-5p, miR-1248, miR-2355-5p, miR-1298-3p, novel\_69, novel\_27, miR-450c-5p, miR-345-5p

|       |                   |                                                                                                                                                                                                                                                                                                                                                                                                                                                                                                                                                                                                                                                                                                                                                                                                                                                                                                                                                                                                                                                                                                                                                                                                                                                                                                                                                                                                                                                                                                                                                                                                                                                                                                                                                                                                                                                                                                                                                                                                                                                                                              |
|-------|-------------------|----------------------------------------------------------------------------------------------------------------------------------------------------------------------------------------------------------------------------------------------------------------------------------------------------------------------------------------------------------------------------------------------------------------------------------------------------------------------------------------------------------------------------------------------------------------------------------------------------------------------------------------------------------------------------------------------------------------------------------------------------------------------------------------------------------------------------------------------------------------------------------------------------------------------------------------------------------------------------------------------------------------------------------------------------------------------------------------------------------------------------------------------------------------------------------------------------------------------------------------------------------------------------------------------------------------------------------------------------------------------------------------------------------------------------------------------------------------------------------------------------------------------------------------------------------------------------------------------------------------------------------------------------------------------------------------------------------------------------------------------------------------------------------------------------------------------------------------------------------------------------------------------------------------------------------------------------------------------------------------------------------------------------------------------------------------------------------------------|
| ARAP1 | ENSOARGO(ArfGAP w | <p>miR-342, miR-1343-5p, miR-543-5p, miR-214-3p, novel_96, miR-491-5p, miR-378a-5p, miR-3600, miR-26b-3p, miR-145b, miR-149-5p, miR-486-5p, miR-1343-5p, miR-145a-5p, miR-23b-5p, novel_133, miR-541, miR-10b, miR-10a-5p, miR-744-5p, miR-885-3p, miR-342-3p, miR-541-3p, miR-145-3p, miR-423-5p, miR-3184-5p, miR-10b-5p, miR-6525, miR-370-3p, miR-10a-5p, miR-504-5p, miR-10b, miR-669, miR-10a, miR-670-3p, novel_69, miR-129b-3p, miR-361-3p, miR-488-3p, miR-2387, miR-23a-5p, miR-885-3p, let-7g-3p, miR-504</p> <p>miR-4492, miR-130b-5p, miR-29b-2-5p, miR-320e, miR-3184-5p, miR-6134, miR-6525, miR-3958-5p, miR-214, miR-2330-3p, miR-4510, miR-3074-5p, miR-3184-3p, miR-625-5p, miR-1895, miR-1827, miR-129b-3p, miR-21a-3p, novel_32, miR-877-5p, miR-6130, miR-139-5p, miR-296-3p, miR-545-3p, miR-2331-3p, miR-21-3p, miR-760-3p, miR-466i-5p, miR-219b-5p, miR-92a-1-5p, miR-185-3p, novel_17, miR-486-3p, miR-29b-1-5p, miR-5100, miR-664-5p, miR-941, novel_73, miR-5703, miR-532-3p, miR-1b-3p, miR-212-5p, miR-3960, miR-4726-5p, miR-107-5p, miR-423-5p, miR-361-3p, miR-877-3p, miR-361-3p, miR-27a-3p, miR-378g, miR-7977, miR-3064-5p, miR-139-5p, miR-103a-2-5p, miR-214-3p, miR-3085-3p, miR-491-5p, miR-29b-1-5p, miR-342, miR-4532, miR-1388-5p, miR-30b-3p, miR-147a, miR-27a-3p, miR-486b-3p, miR-2433, miR-410-5p, miR-1260b, novel_42, miR-7144-5p, miR-1248, miR-876-3p, miR-3154, miR-424-3p, miR-324-5p, miR-154b-5p, miR-2285aa, miR-107, novel_96, miR-2898, miR-1260a, miR-28b, miR-29b-2-5p, miR-3064-5p, miR-4286, miR-3529-3p, miR-1343-5p, miR-3578, miR-24-2-5p, miR-423-3p, miR-128-1-5p, miR-6402, miR-28c, miR-495-3p, miR-342-3p, miR-9851-3p, miR-410-5p, miR-107, miR-3141, miR-6535, miR-146b-3p, miR-2404, novel_69, miR-3074-5p, miR-1343-5p, miR-3141, miR-2331-5p, novel_51, miR-296-3p, miR-296-3p, miR-432-3p, miR-363-5p, miR-130b-5p, miR-4508, miR-744-5p, miR-27b-3p, miR-7862, miR-2889, miR-30b-3p, miR-1260b, miR-1843b-5p, miR-149-5p, miR-194-3p, miR-103, miR-134-3p, miR-185-5p, miR-665, miR-103a-3p, miR-133b-5p</p> |
| DTX3  | ENSOARGO(deltex 3 |                                                                                                                                                                                                                                                                                                                                                                                                                                                                                                                                                                                                                                                                                                                                                                                                                                                                                                                                                                                                                                                                                                                                                                                                                                                                                                                                                                                                                                                                                                                                                                                                                                                                                                                                                                                                                                                                                                                                                                                                                                                                                              |

novel\_99, miR-34b-5p, miR-433-3p, miR-129b-3p, miR-2285c, miR-299, miR-582-5p, miR-376e-3p, miR-182-5p, miR-548o-3p, miR-140-5p, miR-221-5p, miR-487a-5p, miR-665, miR-320e, miR-2285j, miR-346, miR-665-5p, miR-3958-5p, miR-145a-3p, miR-539-5p, miR-361-5p, miR-19b-3p, miR-188-3p, miR-2300b-3p, miR-532-3p, miR-200b, miR-487a-3p, miR-485-3p, miR-548e-3p, miR-221-5p, miR-466i-5p, miR-125b, miR-345-3p, miR-500a-5p, miR-374a-5p, miR-618, miR-2432, miR-376c-3p, miR-130a-5p, miR-376a-5p, miR-216c-5p, miR-136-5p, miR-378j, miR-140-5p, miR-1185-2-3p, miR-25, miR-2285u, miR-2284q, miR-450a-5p, miR-452-5p, miR-1296-5p, miR-3956-3p, novel\_60, miR-1839-5p, miR-2426, miR-299a-5p, miR-1388-5p, miR-30b-3p, miR-125b-2-3p, miR-3962, miR-1298-5p, miR-1185-3p, miR-2285e, miR-539-5p, miR-147a, miR-103a-2-5p, miR-182-5p, miR-505, miR-1306-5p, miR-2310, miR-8485, miR-376b, miR-2330-5p, miR-101b-3p, miR-1814c, miR-671-5p, miR-1248, miR-7144-5p, miR-3074-1-3p, novel\_48, miR-345-5p, miR-10b-3p, miR-2448-3p, miR-331-5p, miR-376c-3p, miR-133c, miR-223-5p, miR-365a-3p, miR-125a, miR-370-3p, miR-3068-3p, miR-331-5p, miR-138-5p, miR-409-3p, miR-135a-5p, miR-144, miR-26c, miR-125b-5p, miR-135a-1-3p, miR-5100, miR-1260b, miR-193a-5p, miR-200b-3p, miR-411-3p, miR-2427, miR-3578, miR-345-3p, miR-3591-5p, miR-6516-5p, miR-758-5p, miR-376a-5p, miR-1224-5p, miR-429-3p, miR-127-5p, miR-200c-3p, miR-200c, miR-1260a, miR-450c-5p, miR-1957a, miR-29a-5p, miR-450b-5p, miR-380-5p, miR-376a-2-5p, miR-135b-5p, miR-7975, miR-19a-3p, miR-410-5p, miR-21c, miR-1306, miR-144-3p, miR-2404, miR-625-3p, miR-379-3p, miR-33a-3p, miR-485-3p, miR-133a-5p, miR-2284w, novel\_27, miR-3959-3p, novel\_101, miR-495-3p, miR-188-5p, miR-1260b, miR-138, miR-21-5p, miR-30b-3p, miR-380-3p, novel\_23, miR-2113, miR-6238, miR-3431, miR-2285g, miR-340-



SUN1 ENSOARGO(Sadl and miR-199b-5p, miR-668-5p, miR-335-3p, miR-2285u, miR-3082-5p, miR-2483-3p, miR-1185-2-3p, miR-2285n, miR-769-5p, miR-3968, miR-3964, miR-363-3p, miR-9-5p, miR-452-5p, miR-181d-5p, miR-2285f, miR-544a, miR-450b-5p, miR-1388-5p, miR-1839-5p, miR-153, miR-1185-3p, miR-2285e, novel\_103, miR-106b-5p, miR-29b-1-5p, miR-199b-5p, miR-153-3p, miR-146b, miR-106a-5p, miR-494-3p, miR-652-5p, miR-1b-5p, miR-4532, miR-2285c, miR-500a-3p, miR-2312, miR-885-3p, miR-32-5p, miR-3065-3p, miR-6130, miR-544-3p, miR-2285j, miR-29b-2-5p, miR-500, miR-4492, miR-4510, miR-769-5p, miR-338-3p, miR-181c-5p, miR-2408, miR-217-5p, miR-941, miR-33b-3p, miR-106a, miR-3960, miR-340-5p, miR-7859, miR-2284h-5p, miR-2285p, miR-185-3p, miR-500a-5p, miR-106a, miR-1277-5p, miR-30b-3p, miR-345-3p, miR-20a, miR-29b-1-5p, miR-146a-5p, miR-486-3p, miR-2285ab, miR-150-5p, miR-146b-5p, miR-320b, novel\_69, miR-29a-3p, miR-20a-5p, miR-4324, novel\_87, miR-29a, miR-6119-3p, miR-92a-3p, miR-29c-3p, miR-199b-5p, miR-181a-5p, miR-138, miR-29b, miR-2285g, miR-544b, miR-20b, miR-146a, miR-17-5p, miR-106a-5p, miR-32, miR-106b-3p, let-7f-2-3p, let-7f-2-3p, miR-2483-5p, let-7a-2-3p, miR-17-5p, miR-93-5p, let-7g-3p, miR-767, miR-23a-5p, miR-20b-5p, miR-2355-5p, miR-370-3p, miR-769, miR-25-3p, miR-199a-5p, miR-223-5p, miR-29b-3p, miR-2284k, miR-767-5p, miR-138-5p, miR-486b-3p, miR-93, miR-3591-5p, miR-23b-5p, miR-29d-3p, miR-885-3p, let-7a-2-3p, miR-1224-5p, miR-9-5p, miR-2285af, miR-217, miR-181b-5p, miR-92a-3p, miR-543-5p, miR-29b-2-5p, miR-92b-3p, miR-3065-3p, miR-199a-5p

let-7b, miR-4510, miR-665-5p, miR-10b-5p, miR-224-5p, miR-346, let-7b-5p, miR-3184-5p, let-7f, miR-324-3p, miR-665, miR-454-3p, miR-874-5p, miR-4492, miR-30c-1-3p, miR-221-5p, miR-504-5p, miR-545-3p, miR-216b-3p, miR-21-3p, miR-296-3p, miR-10a, miR-6516, miR-301a-3p, miR-323-5p, miR-216b-5p, miR-6130, let-7i-5p, miR-877-5p, miR-21a-3p, miR-27b-5p, miR-345-5p, miR-186-5p, miR-216c-5p, miR-20a, miR-345-3p, miR-2432, novel\_17, miR-210-5p, miR-324-3p, miR-106a, miR-98-5p, miR-221-5p, miR-3653-3p, miR-299-3p, let-7k, miR-18a-3p, miR-106a, miR-505-3p, miR-148b-3p, miR-199a-3p, novel\_133, miR-1246, miR-1961, miR-5703, miR-16-1-3p, miR-218-1-3p, miR-378d, miR-148a-5p, miR-361-5p, miR-541-3p, miR-423-5p, miR-3968, miR-2285t, miR-490-5p, miR-664b, miR-3064-5p, miR-10b, miR-203-3p, let-7d-5p, miR-144-5p, miR-1185-2-3p, miR-361-3p, miR-129b-5p, miR-504, miR-1983, miR-544-5p, novel\_94, let-7a-5p, miR-1388-3p, miR-106a-5p, miR-30c-1-3p, miR-199a-3p, miR-326, novel\_103, miR-106b-5p, miR-491-5p, miR-3085-3p, miR-3955-3p, miR-130b-3p, miR-153-3p, let-7e, miR-409b, miR-153, miR-425-3p, miR-1298-3p, miR-9788-3p, miR-455-3p, miR-148b-5p, miR-1185-3p, miR-2459, miR-6529a, miR-484, miR-541, miR-10b, miR-143-5p, miR-3962, miR-30b-3p, miR-3120-5p, miR-193a-5p, miR-144-5p, miR-93, miR-365a-5p, miR-6740-5p, miR-331-3p, miR-370-3p, miR-141-3p, miR-300-3p, miR-365a-3p, miR-3965, miR-93-5p, miR-17-5p, miR-345-5p, miR-3074-1-3p, miR-20b-5p, miR-3064-5p, miR-495-5p, miR-2403, miR-450b-5p, let-7g, miR-1957a, miR-376b-5p, miR-376c-5p, miR-490-3p, miR-2285b, miR-664-3p, miR-30c-2-3p, let-7c-5p, miR-2898, let-7f-5p, miR-200a-3p, miR-543-5p, novel\_96, novel\_127, miR-152-3p, miR-299a-3p, miR-6517, miR-6516-5p, miR-196a-5p, miR-330-5p, let-7d, miR-10a-5p, miR-374c-5p, miR-326-3p, miR-301b-3p, miR-1247-3p, miR-874-3p, novel\_68, miR-1271, miR-216b-3p, miR-370-3p, miR-320b, miR-193b-3p, miR-411b-3p, miR-4443, miR-21a-3p, miR-18a-3p, miR-877-3p, miR-3059-5p, miR-214, miR-193b-3p, miR-346, miR-2428, miR-2433, miR-665, miR-664a, miR-128-1-5p, miR-2284q, novel\_4, miR-18a-3p, miR-505-5p, miR-421, miR-149-5p, miR-2284h-5p, miR-2366, miR-2285w, miR-345-3p, miR-8485, novel\_39, miR-210-5p, miR-2285af, miR-760-3p, miR-491-5p, miR-378a-5p, novel\_127, novel\_96, miR-193a-3p, miR-214-3p, miR-21-3p, miR-106b-3p, miR-148a-3p, miR-3591-5p, miR-3154, miR-1343-5p, miR-148b-3p, miR-505-5p, miR-7977, miR-664a, miR-450a-2-3p, miR-4726-5p, miR-152-3p, miR-543-5p, miR-1343-5p, miR-6525, miR-148b-5p, miR-2428, miR-2330-5p

NCCRP1 ENSOARGOC non-spec

MADD ENSOARGOC MAP-kinase

IQGAP3 ENSOARGOC IQ motif

miR-411-3p, miR-128-3p, miR-1343-5p, miR-330-5p, miR-30a-5p, miR-322-5p, miR-505-5p, miR-2411-5p, miR-545-5p, miR-2285ad, miR-6517, miR-412, miR-2898, novel\_96, miR-205-5p, miR-28b, miR-148b-5p, miR-199a-5p, novel\_39, miR-2285b, miR-181a-2-3p, miR-10b-3p, miR-329a, miR-329b, miR-485-5p, miR-671-5p, miR-30e-5p, miR-362-5p, miR-3154, miR-199a-5p, miR-574-5p, miR-3068-3p, miR-370-3p, miR-1271, miR-486b-3p, miR-28-5p, miR-2433, miR-331-3p, miR-144, miR-500b-5p, miR-145-3p, miR-16-5p, miR-16b, miR-497-5p, miR-873a-5p, miR-1843b-5p, miR-1434-3p, miR-185-5p, miR-134-3p, miR-26b-3p, miR-1343-5p, miR-432-3p, miR-130b-5p, miR-363-5p, miR-668-3p, miR-1291, miR-195a-5p, miR-150-5p, miR-216a-3p, miR-323a-5p, miR-6535, miR-144-3p, miR-320b, miR-379-3p, miR-502-5p, miR-4324, miR-15a, miR-28c, miR-16a, miR-326-3p, miR-199b-5p, novel\_101, miR-378d, novel\_133, miR-362-3p, miR-5703, miR-1197-5p, miR-95-3p, miR-222-5p, miR-15a-5p, miR-199a-3p, miR-151-5p, miR-760-3p, miR-30b-3p, miR-30d, miR-2484, miR-210-5p, miR-324-3p, miR-219b-5p, miR-486-3p, miR-2411, miR-105-3p, miR-1895, miR-625-5p, novel\_99, miR-1827, miR-582-5p, miR-30d-5p, miR-2284s, miR-582-5p, miR-6130, miR-323-5p, miR-204-3p, miR-15b-5p, miR-151b, miR-216b-3p, miR-664a, miR-6516-3p, miR-874-5p, miR-424-5p, miR-708-5p, miR-130b-5p, miR-665, miR-6525, miR-346, miR-338-3p, miR-6134, miR-539-5p, miR-4510, miR-145a-3p, miR-214, miR-362-3p, miR-1388-5p, miR-2426, miR-101c, miR-329-3p, miR-541, miR-412-3p, miR-500-5p, miR-455-3p, miR-2459, novel\_4, miR-2300a-5p, miR-1343-3p, miR-491-5p, miR-199b-5p, miR-214-3p, miR-103a-2-5p, miR-199a-3p, miR-326, novel\_103, miR-362-3p, miR-16b, miR-3187-3p, miR-8485, miR-4532, miR-424-5p, miR-2330-5p, miR-744-3p, miR-668-5p, miR-199b-5p, miR-3596, miR-378g, miR-489, miR-203-3p, miR-1792, miR-20a-3p, miR-1796-5p, miR-396A, miR-

miR-548e-3p, miR-7641, miR-9-5p, novel\_83, miR-2284h-5p, miR-376a-5p, miR-1434-5p, miR-19b-3p, let-7a-3p, miR-148a-5p, miR-128-3p, miR-155-5p, miR-2285w, miR-664b-3p, miR-92b-3p, miR-380-3p, miR-200a, miR-2285p, miR-3071-3p, miR-181b-5p, miR-202-5p, miR-2284m, miR-92a-3p, miR-200a-3p, miR-1277-5p, miR-3068-3p, miR-32-3p, miR-548o-3p, miR-545-3p, miR-140-5p, miR-32-5p, miR-141-3p, miR-216b-3p, miR-2285aa, miR-25-3p, miR-499b-3p, miR-301a-3p, miR-155-5p, miR-204-3p, miR-2285c, let-7f-1-3p, miR-299, miR-137-3p, miR-2318, miR-7144-5p, novel\_48, miR-590-3p, miR-323-3p, miR-494-5p, miR-19b-1-5p, miR-155-5p, miR-130b-5p, miR-204-5p, miR-454-3p, novel\_78, miR-145b, miR-130a-3p, miR-1298-3p, miR-2285g, miR-412-5p, miR-2284d, miR-1185-3p, miR-2285e, miR-126a-5p, miR-2355-3p, miR-149-5p, miR-148b-5p, miR-181a-5p, miR-19b-2-5p, miR-2284r, novel\_23, miR-145a-5p, miR-125b-2-3p, miR-374b-3p, miR-299a-5p, miR-450b-5p, miR-380-3p, miR-3120-5p, miR-382-3p, miR-493-5p, miR-130b-5p, let-7f-2-3p, let-7f-2-3p, miR-491-3p, let-7j, novel\_103, novel\_51, miR-32, miR-505, miR-103a-2-5p, miR-216b-3p, miR-3120-3p, miR-211-5p, miR-2483-3p, miR-2404, miR-499a-3p, miR-3596, miR-1185-2-3p, miR-216a-3p, miR-136-5p, miR-19a-3p, miR-450b-3p, miR-376a-2-5p, miR-493-5p, miR-363-3p, miR-3956-3p, novel\_60, miR-219b-3p, miR-32-3p, miR-2447, miR-181d-5p, miR-9-5p, miR-2285x, miR-211, miR-301b-3p, miR-154a, novel\_27, miR-107-5p, miR-485-3p, miR-92a-3p, miR-2284q, miR-147-5p

miR-493-5p, miR-1983, miR-409-5p, miR-199b-5p, miR-129b-5p, miR-499a-3p, miR-2483-3p, let-7d-5p, miR-454-5p, miR-2319b, miR-450a-5p, miR-490-5p, miR-3964, miR-218-5p, miR-382-3p, miR-769-5p, miR-2447, miR-3059-5p, miR-363-3p, miR-541-3p, miR-2285f, miR-181d-5p, miR-9-5p, miR-544a, miR-1839-5p, miR-2284aa, miR-16-2-3p, miR-484, miR-10b, miR-541, miR-153, miR-539-5p, miR-455-3p, miR-2285e, miR-105-1, novel\_78, miR-151a-3p, miR-181b-2-3p, miR-491-5p, miR-3955-3p, miR-153-3p, miR-199b-5p, let-7e, miR-16b, miR-1b-5p, let-7a-5p, miR-424-5p, miR-494-3p, miR-23a-3p, miR-744-3p, miR-2312, miR-345-5p, novel\_99, miR-2285c, miR-10a, miR-544-3p, miR-499b-3p, miR-204-3p, novel\_25, let-7i-5p, miR-15b-5p, miR-32-5p, miR-548o-3p, miR-216b-3p, miR-532-5p, miR-450b-3p, miR-487b-5p, miR-208b-5p, miR-424-5p, miR-130b-5p, miR-2285j, let-7f, miR-151-3p, miR-769-5p, miR-10b-5p, let-7b-5p, miR-181c-5p, miR-539-5p, let-7b, miR-142-3p, miR-19b-3p, miR-218-1-3p, miR-1961, miR-1246, miR-1434-5p, miR-217-5p, miR-23b-3p, miR-7859, miR-383-5p, miR-23c, miR-200b, miR-15a-5p, miR-148b-3p, miR-1247-5p, miR-328-3p, miR-548e-3p, miR-98-5p, miR-3653-3p, let-7k, miR-26a-5p, miR-618, miR-125b-2-3p, miR-181b-1-3p, miR-2285w, miR-195a-3p, miR-412-3p, miR-19a-3p, miR-6395, miR-195a-5p, let-7e-5p, miR-2285ab, miR-148a-3p, miR-144-3p, miR-677, miR-181b-3p, miR-26b-5p, miR-10a-5p, miR-92a-3p, miR-656-5p, miR-147-5p, miR-15a, miR-6402, miR-16a, let-7i, miR-323c, miR-199b-5p, miR-1a-1-5p, miR-16b, miR-497-5p, miR-1285, miR-2113, miR-223-3p, miR-3071-5p, miR-2285g, miR-3431, let-7g-5p, miR-194-3p, miR-544b, miR-31-5p, miR-133b-5p, miR-378a-5p, miR-483-3p, miR-32, miR-197-5p, miR-365b-5p, miR-105-5p, let-7j, miR-345-5p, miR-130b-5p, miR-493-5p, miR-345-5p, miR-190a-3p, miR-488-3p, miR-200a-5p, miR-23b, miR-3154, miR-331-5p, miR-769, miR-

miR-2285r, miR-296-3p, miR-493-5p, miR-380-5p, miR-660, miR-296-3p, miR-582, miR-224-5p, miR-17-5p, miR-106a-5p, miR-412-5p, miR-20b, miR-411-5p, miR-31-5p, miR-377-5p, miR-665, miR-1260b, miR-6239, miR-1285, miR-199b-5p, miR-326-3p, miR-542-5p, miR-576-3p, miR-20a-5p, miR-320c, miR-2285k, miR-450b-3p, miR-9851-3p, miR-2285ab, miR-3065-5p, miR-1306, miR-380-5p, miR-490-3p, miR-199a-5p, miR-29a-5p, miR-1957a, miR-4286, miR-200a-3p, miR-1260a, miR-2411-5p, miR-758-5p, miR-214-5p, miR-129-1-3p, miR-134-5p, miR-1224-5p, miR-7641, miR-412, miR-496, miR-134, miR-330-5p, miR-1260b, miR-374a-3p, miR-323-3p, miR-93, miR-133a-3p, miR-374b-3p, miR-134-5p, miR-494-5p, miR-3969, miR-6740-5p, miR-199a-5p, miR-503-3p, miR-574-5p, miR-215-5p, miR-1271, miR-141-3p, miR-542-5p, miR-329b, miR-485-5p, miR-671-5p, miR-1248, miR-23a-5p, miR-20b-5p, miR-2448-3p, miR-17-5p, miR-3154, miR-320a, miR-93-5p, miR-3187-3p, miR-106a-5p, miR-652-5p, miR-1468, miR-542-5p, miR-199b-5p, miR-326, miR-1306-5p, miR-320b, miR-106b-5p, miR-323b-3p, miR-9788-3p, miR-148b-5p, miR-2300a-5p, miR-301b-5p, miR-484, miR-2284r, miR-412-3p, miR-323b, miR-361-3p, miR-154a, miR-423-5p, miR-3956-3p, novel\_60, miR-2447, miR-2285f, miR-374a-3p, novel\_82, miR-301a-5p, miR-4443, miR-2319b, miR-504, miR-9-3p, miR-493-5p, miR-199b-5p, miR-361-3p, miR-377-5p, miR-2285i, miR-2411, miR-2285w, miR-345-3p, miR-20a, miR-106a, miR-320d, miR-2484, miR-542-5p, miR-324-3p, miR-340-5p, miR-2284h-5p, miR-1247-5p, miR-106a, miR-548e-3p, miR-4429, miR-148a-5p, miR-133a-3p, miR-215-5p, miR-140-3p, miR-5703, miR-2904, miR-224-5p, miR-338-3p, miR-3184-5p, miR-4510, miR-129-2-3p, miR-539-5p, miR-6516-3p, miR-874-5p, miR-1468-5p, miR-6130, miR-192-5p, miR-877-5p, miR-204-3p, miR-660-5p, miR-504-5p, miR-133b-3p, miR-2312, miR-1827, miR-190b-3p, miR-4532, miR-4443, miR-6130, miR-483-3p, miR-4510, miR-485-5p, miR-483-3p, miR-25-5p, miR-324-3p, miR-3601, miR-2904, miR-1197-5p, miR-488-3p, miR-296-5p

miR-542-5p, miR-235b-5p, miR-125a, miR-1271, miR-574-5p, miR-3068-3p, miR-503-3p, miR-1248, miR-767, miR-345-5p, miR-329b, miR-1260b, miR-1197-3p, novel\_42, novel\_9, miR-125b-5p, miR-2433, miR-758-5p, miR-1224-5p, miR-299a-3p, miR-1343-5p, miR-330-5p, novel\_39, miR-2285b, miR-3064-5p, miR-200a-3p, miR-152-3p, miR-125a-3p, miR-219-3p, miR-320c, miR-299b-3p, miR-3120-3p, novel\_68, miR-146b-5p, miR-378f, miR-412-3p, miR-3970, miR-216a-3p, miR-148a-3p, miR-2284w, miR-301b-3p, miR-193b-3p, miR-335-5p, miR-6119-3p, miR-425-5p, miR-4324, miR-149-5p, miR-194-3p, miR-412-5p, miR-134-3p, miR-31-5p, miR-103a-3p, miR-188-5p, miR-22-3p, miR-197-3p, novel\_23, miR-432, miR-2113, miR-6240, miR-193a-3p, miR-483-3p, miR-378a-5p, novel\_51, miR-194a, miR-146a, miR-151b, miR-301a-3p, miR-2284s, miR-548o-3p, miR-1895, miR-543-3p, miR-1827, miR-345-5p, miR-2285c, miR-3184-5p, miR-181c-5p, miR-6525, miR-769-5p, miR-214, miR-3184-3p, miR-454-3p, miR-874-5p, miR-4492, miR-130b-5p, miR-219b-3p, miR-30a-3p, miR-664a-5p, miR-665, miR-3604, miR-30e-3p, miR-30d-3p, miR-133a-3p, miR-34a-5p, miR-142-3p, miR-378a-3p, miR-378i, miR-486-3p, miR-2424, miR-143-3p, miR-92a-1-5p, miR-422a, miR-210-5p, miR-1185-2-3p, miR-4443, miR-3596, miR-378g, miR-211-5p, miR-1983, miR-9-3p, miR-423-5p, miR-361-3p, novel\_111, miR-2447, miR-3956-3p, miR-218-5p, miR-2440, miR-1185-3p, miR-153, miR-147a, miR-330-3p, miR-1839-5p, miR-8485, miR-378d, miR-676-3p, miR-127-3p, miR-146b, miR-153-3p, miR-214-3p, miR-130b-3p, miR-34c-5p, miR-769, miR-370-3p, miR-141-3p, miR-7144-5p, miR-23a-5p, miR-485-5p, let-7g-3p, miR-320a, miR-362-5p, miR-378c, miR-6128, miR-1306-5p, miR-486b-3p, miR-204-5p, miR-28-5p, miR-138-5p, miR-767-5p, miR-5100, miR-483-3p, miR-378h, miR-128-3p, miR-496, miR-376c-5p, miR-1957a, miR-3065-3p, miR-190-3p, miR-30a-3p, miR-320c, miR-6517, miR-2300a-5p, miR-542-5p, miR-4429, miR-101c, miR-2284r, miR-320a, miR-2428, novel\_42, miR-181a-2-3p, miR-4286, miR-128-1-5p, miR-320d, miR-106b-3p, miR-4492, miR-320b, miR-208a-3p, miR-5126, miR-208b-3p, miR-330-5p, miR-3120-5p, miR-128-3p, miR-1224-5p, miR-2300a-5p, miR-133b-5p, miR-216a-3p, miR-134-3p, miR-326, miR-214-3p, miR-760-3p, miR-3085-3p, miR-3064-5p, miR-2483-5p, miR-143-3p, miR-490-3p, miR-24-2-5p, miR-216a-3p, miR-2285ab, miR-7144-5p, miR-450b-3p, miR-2312, miR-552-3p, miR-3074-5p, miR-3064-5p, miR-2331-3p, miR-24-1-5p, miR-204-3p, miR-378g, miR-656-5p, miR-203b-5p, miR-214, miR-2285f, miR-6527, miR-3074-5p, miR-2447, miR-326-3p, miR-6525

SIX2 ENSOARGO(SIX home)

TNRC6C ENSOARGO(trinucle)

LRRC20 ENSOARGO(leucine)

miR-15b-5p, miR-22-3p, miR-199a-5p, miR-769, miR-193b-3p, miR-17-5p, miR-93-5p, miR-450a-1-3p, miR-20b-5p, miR-16-5p, miR-1260b, miR-769-5p, miR-93, miR-424-5p, miR-450b-3p, miR-412, miR-106a, miR-328-3p, miR-450a-1-3p, miR-15a-5p, miR-383-5p, miR-322-5p, miR-188-3p, novel\_133, miR-20a, miR-199a-5p, miR-142a-3p, miR-2478, miR-1260a, miR-106a, miR-3120-3p, miR-452-3p, miR-3596, miR-146b-3p, miR-199b-5p, miR-6395, miR-195a-5p, novel\_101, miR-193b-3p, miR-199b-5p, miR-361-3p, miR-16a, miR-769-5p, miR-20a-5p, miR-15a, miR-499a-5p, miR-421, miR-20b, miR-142-3p, miR-412-3p, miR-450c-3p, miR-22-3p, miR-6529a, miR-497-5p, miR-1260b, miR-16b, miR-101-5p, miR-424-5p, miR-106a-5p, miR-3187-3p, miR-16b, miR-106b-5p, miR-17-5p, miR-106a-5p, miR-505, miR-193a-3p, miR-199b-5p, miR-128-3p, miR-1290, miR-3591-5p, miR-582-3p, miR-758-5p, miR-429-3p, miR-299a-3p, miR-299-3p, miR-21-3p, miR-1277-5p, miR-6536, miR-181b-5p, miR-200c-3p, miR-127-5p, miR-2284m, miR-17-3p, miR-200c, miR-2285af, miR-490-3p, miR-192-3p, miR-2432, miR-29b-1-5p, miR-2312, miR-411, miR-137-3p, miR-200a-5p, miR-204-3p, miR-216b-5p, miR-2285aa, miR-17-3p, miR-19b-1-5p, miR-5100, miR-2284k, miR-181c-5p, novel\_44, miR-142a-5p, miR-3607-3p, miR-6128, miR-145a-3p, miR-2284v, miR-27b-3p, miR-2284x, miR-3120-5p, miR-101c, miR-16-1-3p, miR-2284ab, novel\_23, miR-323b, miR-181a-5p, miR-1434-3p, miR-873a-5p, miR-708-3p, miR-19b-2-5p, miR-216a-3p, miR-142-5p, miR-27a-3p, miR-548w, miR-3955-3p, miR-323b-3p, miR-29b-1-5p, miR-1b-5p, miR-8485, miR-376b, miR-382, miR-382-3p, miR-6516-3p, miR-3065-5p, miR-216a-3p, miR-378j, miR-2285ab, miR-27a-3p, miR-299b-3p, miR-7-1-3p, miR-541-5p, novel\_1, miR-133a-5p, miR-101-3p, miR-8095, miR-2284j, miR-17-3p, miR-181d-5p, miR-2285f, miR-2447

PIP4K2C ENSOARGO( phosphat

PLS1 ENSOARGO( plastin



miR-106a, miR-2284u, miR-193b-5p, miR-378i, miR-378a-3p, miR-181b-1-3p, miR-143-3p, miR-486-3p, miR-2484, novel\_17, miR-345-3p, miR-422a, miR-500a-5p, miR-216b-5p, miR-582-5p, miR-15b-5p, miR-30c-1-3p, miR-2331-3p, miR-345-5p, miR-186-5p, miR-411, miR-3074-5p, miR-590-3p, novel\_74, miR-190a-5p, miR-2285j, miR-665, miR-151-3p, miR-539-5p, miR-1298-3p, miR-2459, miR-455-3p, miR-1343-3p, miR-145b, miR-181b-2-3p, miR-1388-5p, miR-101c, miR-758-3p, miR-378d, miR-1b-5p, miR-8485, miR-1388-3p, miR-103a-2-5p, miR-16b, miR-106b-5p, miR-29b-1-5p, miR-2319b, miR-139-5p, miR-211-5p, miR-668-5p, miR-544-5p, miR-1983, miR-493-5p, miR-140-5p, miR-877-3p, miR-7705, miR-2447, miR-190b-5p, miR-2284j, miR-499a-5p, miR-322-5p, miR-2284z, miR-299a-3p, miR-330-5p, miR-23b-5p, miR-1343-5p, miR-2285b, novel\_39, miR-200a, miR-29a-5p, miR-3064-5p, miR-6536, miR-127-5p, miR-331-5p, miR-2318, miR-345-5p, miR-20b-5p, miR-331-5p, miR-93-5p, miR-16-5p, miR-331-5p, novel\_63, miR-2284k, miR-412-5p, miR-411-5p, miR-194-3p, novel\_116, miR-3955-5p, miR-16b, miR-188-5p, miR-2284x, miR-497-5p, miR-223-3p, miR-2113, miR-19b-2-5p, miR-432-3p, miR-432-3p, miR-503-3p, let-7a-2-3p, miR-493-5p, miR-380-5p, miR-194a, miR-2411-3p, miR-105-5p, miR-299b-3p, miR-181b-3p, miR-6535, miR-320c, miR-677, miR-3074-5p, miR-3120-3p, miR-412-3p, miR-378f, miR-2319a, miR-3065-5p, miR-3591-3p, miR-150-5p, miR-625-3p, novel\_87, miR-340-5p, miR-15a-5p, miR-4429, miR-1246, miR-215-5p, novel\_133, miR-1197-5p, miR-5703, miR-2904, miR-130a-5p, miR-29b-1-5p, miR-20a, miR-106a, miR-2284m, miR-320d, miR-299-3p, miR-21-3p, miR-30b-3p, miR-216a-5p, miR-139-5p, miR-544-3p, miR-192-5p, miR-877-5p, miR-204-3p, miR-140-5p, miR-378a-3p, miR-21-3p, miR-154b-3p, let-7g-3p, miR-21a-3p, miR-145a-3p, miR-378c, miR-530-5p, miR-425-5p, miR-17-3p, miR-124-5p, miR-20b-2-5p, miR-361-3p, miR-17-3p, miR-214, miR-219b-3p, novel\_42, miR-486b-3p, miR-28-5p, miR-708-5p, miR-4492, miR-17-3p, miR-128-1-5p, novel\_69, miR-670-3p, miR-499b-5p, miR-3065-3p, miR-1983, miR-412-3p, novel\_91, miR-361-3p, miR-486-3p, miR-2432, miR-3065-3p, miR-4532, miR-495-5p, miR-127-3p, miR-214-3p, miR-17-3p, novel\_19, miR-5126, miR-412-5p, miR-222-5p, miR-412, miR-2300a-5p, miR-744-5p, miR-2426, miR-412-3p, miR-1290, miR-484

CCDC109B ENSOARGO(coiled-coiled) 2318, miR-548e-3p, miR-3600, miR-432-5p, miR-7859, miR-411-5p, miR-148b-5p, miR-1185-3p, miR-432, miR-329-3p, miR-19b-2-5p, miR-10b, miR-542-3p, miR-362-3p, miR-124-3p, miR-188-3p, miR-362-3p, miR-10a-5p, miR-148a-5p, miR-2284u, miR-124a, let-7f-2-3p, let-7f-2-3p, miR-2284b, miR-148b-5p, miR-200a, miR-2284y, miR-2284a, miR-362-3p, miR-466f-3p, miR-214-3p, miR-2484, miR-21-3p, miR-2284g, miR-452-3p, miR-499b-5p, miR-532-5p, miR-10a-5p, miR-10a, miR-6535, miR-154b-5p, miR-1185-2-3p, miR-378b, miR-133b-3p, miR-450b-3p, miR-412-3p, miR-329a, miR-7144-5p, miR-625-5p, miR-335-3p, miR-1983, miR-3059-5p, miR-133a-3p, miR-214, novel\_101, miR-10b-5p, novel\_82, miR-19b-1-5p, miR-665

GAREM ENSOARGO(GRB2 ass) 2484, miR-21-3p, miR-2284g, miR-452-3p, miR-499b-5p, miR-532-5p, miR-10a-5p, miR-10a, miR-6535, miR-154b-5p, miR-1185-2-3p, miR-378b, miR-133b-3p, miR-450b-3p, miR-412-3p, miR-329a, miR-7144-5p, miR-625-5p, miR-335-3p, miR-1983, miR-3059-5p, miR-133a-3p, miR-214, novel\_101, miR-10b-5p, novel\_82, miR-19b-1-5p, miR-665

TMEM57 ENSOARGO(transmembrane) 2484, miR-21-3p, miR-2284g, miR-452-3p, miR-499b-5p, miR-532-5p, miR-10a-5p, miR-10a, miR-6535, miR-154b-5p, miR-1185-2-3p, miR-378b, miR-133b-3p, miR-450b-3p, miR-412-3p, miR-329a, miR-7144-5p, miR-625-5p, miR-335-3p, miR-1983, miR-3059-5p, miR-133a-3p, miR-214, novel\_101, miR-10b-5p, novel\_82, miR-19b-1-5p, miR-665

miR-29b, miR-1260b, miR-2426, miR-16-2-3p, miR-744-5p, miR-2284x, miR-296-5p, miR-145a-5p, miR-496-5p, miR-134-3p, miR-221-3p, miR-149-5p, miR-145b, miR-491-5p, miR-483-3p, miR-146b, miR-199b-5p, miR-326, miR-146a, miR-2331-5p, novel\_51, miR-182-5p, miR-30c-1-3p, miR-6412, miR-1388-3p, miR-494-3p, miR-3963, miR-412-3p, miR-668-5p, miR-146b-5p, miR-135b-5p, miR-1983, miR-361-3p, miR-2285ab, miR-199b-5p, miR-1306-3p, miR-378g, novel\_69, miR-2483-3p, miR-29a-3p, novel\_68, miR-3074-5p, miR-320b, miR-211-5p, miR-3968, miR-29a, miR-147-5p, miR-615, miR-142b, miR-371a-5p, miR-2285y, miR-211, miR-24-3p, miR-326-3p, miR-1285-5p, miR-199b-5p, miR-136-3p, miR-2285f, novel\_101, miR-29c-3p, miR-17-3p, miR-184-3p, miR-300, novel\_133, miR-615-3p, miR-29d-3p, miR-1434-5p, miR-330-5p, miR-483-3p, miR-2411-5p, miR-151-5p, miR-532-3p, miR-222, miR-2285ad, miR-7641, miR-1224-5p, miR-17-3p, miR-760-3p, miR-1277-5p, novel\_96, miR-1260a, miR-125a-3p, miR-324-3p, miR-30c-2-3p, miR-2411, novel\_39, miR-146a-5p, miR-199a-5p, miR-2432, miR-195a-3p, miR-5100, miR-2312, miR-876-3p, miR-485-5p, miR-381-3p, miR-598-3p, miR-200a-5p, miR-27a-5p, miR-2284s, miR-199a-5p, miR-151b, miR-30c-1-3p, miR-2355-5p, miR-598-3p, miR-182-5p, miR-17-3p, miR-708-5p, miR-204-5p, miR-28-5p, miR-29b-3p, miR-2433, miR-551b-3p, miR-1306-3p, miR-338-5p, miR-135a-5p, miR-1260b, novel\_42, miR-181a-2-3p, miR-3074-5p, miR-3074-2-3p

miR-235b-5p, miR-125a, miR-874-3p, miR-300-3p, miR-23b, miR-193a-5p, novel\_42, miR-1260b, miR-1197-3p, miR-125b-5p, miR-6740-5p, miR-592, novel\_79, miR-1224-5p, miR-412, miR-6517, miR-505-5p, miR-1343-5p, miR-330-5p, miR-196a-5p, miR-885-3p, miR-3064-5p, miR-200a, novel\_39, miR-3956-5p, miR-2285b, miR-192-3p, miR-148b-5p, miR-125a-3p, miR-200a-3p, novel\_127, miR-127-5p, miR-3120-3p, novel\_68, miR-669, miR-150-5p, miR-1306, miR-216a-3p, miR-378f, miR-412-3p, miR-193b-3p, miR-29c-3p, miR-199b-5p, miR-208a-3p, miR-28c, miR-29a, miR-487b-3p, miR-339-5p, miR-149-5p, miR-194-3p, miR-412-5p, miR-3431, miR-134-3p, miR-197-3p, miR-7b-5p, miR-628-5p, novel\_51, miR-2411-3p, miR-7-5p, miR-193a-3p, miR-378a-5p, miR-483-3p, miR-196b-5p, miR-552-3p, miR-2331-3p, miR-504-5p, miR-10a, miR-2284s, miR-2285c, miR-885-3p, miR-543-3p, miR-1827, miR-339b, miR-665-5p, miR-214, miR-30a-3p, miR-664a-5p, miR-665, miR-30e-3p, miR-874-5p, miR-4492, miR-30d-3p, miR-212-5p, miR-18a-3p, miR-2284h-5p, miR-23b-3p, miR-23c, miR-378a-3p, miR-378i, miR-2366, miR-193b-5p, miR-133a-3p, miR-34a-5p, miR-33b-3p, miR-195a-3p, miR-2285w, miR-486-3p, miR-219b-5p, miR-3601, miR-324-3p, miR-422a, miR-345-3p, novel\_17, miR-208b-3p, miR-210-5p, miR-2484, miR-7689-3p, miR-24-1-5p, miR-4792, miR-2319b, miR-4443, miR-378g, miR-1983, miR-504, miR-2447, miR-7705, miR-877-3p, miR-361-3p, miR-218-5p, miR-145b, novel\_78, miR-1343-3p, miR-1298-3p, miR-147a, miR-2284r, miR-541, miR-23a-3p, miR-676-3p, miR-744-3p, miR-574-3p, miR-378d, miR-505, miR-199b-5p, miR-214-3p, miR-1185-5p, miR-370-3p, miR-141-3p, miR-615-5p, miR-199a-5p, miR-34c-5p, miR-3154, miR-3074-1-3p, miR-485-5p, miR-671-5p, miR-6128, miR-378c, miR-145-3p, miR-331-3p, miR-3969, miR-551b-3p, miR-29b-3p, miR-370-5p, miR-31-3p, miR-486b-3p, miR-28-5p, miR-378b, miR-483-3p, miR-29d-3p, miR-345-3p, miR-128-

miR-2411-3p, miR-130b-5p, miR-345-5p, miR-432-3p, miR-432-3p, miR-2284l, miR-22-3p, miR-1285, miR-181a-5p, miR-1434-3p, miR-188-5p, miR-29b, miR-2284ab, miR-380-3p, miR-411-5p, miR-2284d, miR-134-3p, miR-185-5p, miR-142b, miR-421-5p, miR-147-5p, miR-29a, miR-379-3p, novel\_1, miR-29c-3p, miR-1193, miR-219b-3p, miR-199b-5p, miR-2428, miR-3959-3p, miR-18a-3p, miR-2285ab, miR-2285k, miR-3120-3p, miR-320c, miR-669, miR-29a-3p, miR-30c-2-3p, miR-181c-3p, miR-2285af, miR-200a-3p, novel\_127, miR-127-5p, miR-181b-5p, miR-3064-5p, miR-181a-2-3p, miR-2403, miR-199a-5p, miR-200a, novel\_39, miR-2284a, miR-490-3p, miR-29d-3p, miR-345-3p, miR-134, miR-134-5p, miR-758-5p, miR-3969, miR-29b-3p, miR-410-5p, novel\_63, miR-2332, miR-370-5p, miR-134-5p, miR-486b-3p, miR-6128, miR-1306-5p, miR-2284v, miR-323-3p, miR-3154, miR-320a, miR-381-3p, miR-671-5p, miR-345-5p, miR-2355-5p, miR-141-3p, miR-199a-5p, miR-154b-5p, miR-300-3p, miR-320b, novel\_115, miR-199b-5p, miR-3085-3p, miR-2284b, miR-8485, miR-30c-1-3p, miR-125b-2-3p, miR-301b-5p, miR-16-2-3p, miR-2426, miR-9788-3p, miR-148b-5p, miR-216a-3p, miR-421, miR-425-3p, miR-301a-5p, novel\_82, miR-382-3p, miR-490-5p, miR-2284q, miR-2285f, miR-181d-5p, miR-423-5p, miR-1285-5p, miR-381-3p, miR-361-3p, miR-140-5p, miR-199b-5p, miR-9-3p, novel\_94, miR-499b-5p, miR-126b-5p, miR-3064-5p, miR-203-3p, miR-378g, miR-2483-3p, miR-219b-5p, miR-216a-5p, miR-324-3p, miR-345-3p, novel\_17, miR-221-5p, miR-1277-5p, miR-3653-3p, miR-2484, miR-320d, miR-195a-3p, miR-183-5p, miR-216c-5p, miR-486-3p, miR-380-3p, miR-664b-3p, miR-2285i, miR-5703, miR-1197-5p, miR-2300b-3p, miR-133a-3p, miR-148a-5p, miR-4429, miR-3600, miR-18a-3p, miR-616-3p, novel\_83, miR-320e, miR-2285j, miR-4492, miR-130b-5p, miR-425-5p, miR-539-5p, miR-145a-3p, miR-2184-5p, miR-181c-5p, miR-6525, miR-129b-5p, miR-767-5p, miR-29a, miR-424-5p, miR-2433, miR-29b-3p, miR-15a, miR-222-3p, miR-16a, miR-145-3p, miR-4510, miR-16-5p, miR-29c-3p, novel\_101, miR-9-5p, miR-767, miR-10b-3p, miR-195a-5p, miR-671-5p, miR-221, miR-377-3p, miR-6130, novel\_69, miR-29a-3p, miR-6535, miR-15b-5p, miR-378b, miR-377-3p, miR-324-3p, miR-16b, miR-185-3p, miR-4532, miR-424-5p, miR-363-5p, miR-676-3p, miR-29b, miR-16b, miR-497-5p, miR-29d-3p, miR-9-5p, miR-322-5p, miR-15a-5p, miR-221-3p, miR-421, miR-222

MEP1B ENSOARGO(mepprin A

COL4A1 ENSOARGO(collagen

miR-1248, miR-329b, miR-34b-5p, miR-300-3p, miR-2285aa, miR-874-3p, miR-574-5p, miR-134-5p, miR-2433, novel\_42, miR-330-5p, miR-2427, miR-486-5p, miR-129-1-3p, novel\_121, miR-2284z, miR-134-5p, miR-450a-1-3p, miR-505-5p, novel\_79, novel\_96, miR-200a-3p, novel\_127, miR-127-5p, let-7f-5p, miR-2285b, let-7g, miR-378f, let-7e-5p, miR-3065-5p, miR-181b-3p, miR-6535, miR-677, miR-144-3p, miR-374c-3p, miR-411b-3p, miR-6123, miR-576-3p, miR-28c, miR-26a-2-3p, miR-381-5p, miR-450c-3p, miR-22-3p, miR-1843b-5p, miR-134-3p, miR-339-5p, miR-103a-3p, miR-106b-3p, miR-483-3p, miR-378a-5p, miR-194a, miR-2411-3p, miR-365b-5p, let-7f-2-3p, let-7f-2-3p, miR-668-3p, miR-6240, miR-339b, miR-345-5p, miR-30d-5p, miR-450a-1-3p, let-7i-5p, miR-552-3p, miR-2331-3p, miR-130b-5p, miR-4492, miR-129-5p, miR-665, let-7f, miR-122-5p, miR-3184-5p, miR-224-5p, miR-129-2-3p, let-7b, miR-361-5p, miR-133a-3p, miR-33b-3p, miR-378a-3p, miR-1961, miR-378i, miR-30c-5p, miR-328-3p, miR-18a-3p, let-7k, miR-98-5p, miR-422a, miR-345-3p, miR-92a-1-5p, miR-219b-5p, miR-324-3p, novel\_17, miR-618, miR-143-3p, miR-486-3p, miR-181b-1-3p, miR-377-5p, miR-668-5p, miR-136-5p, miR-3963, miR-1306-3p, miR-140-5p, miR-1185-2-3p, miR-203-3p, miR-378g, miR-25, miR-3968, miR-301a-5p, miR-2440, miR-423-5p, miR-877-3p, miR-6527, miR-885-5p, miR-2447, miR-301b-5p, miR-1185-3p, miR-2459, miR-496-5p, miR-181b-2-3p, miR-1343-3p, miR-330-3p, novel\_78, miR-381-5p, miR-103a-2-5p, miR-491-5p, miR-505, novel\_19, miR-378d, miR-124a, miR-7144-5p, miR-3074-1-3p, miR-3154, miR-365a-3p, miR-141-3p, miR-28-5p, miR-486b-3p, miR-138-5p, miR-3969, miR-144, miR-331-3p, miR-5100, miR-1306-3p, miR-410-5p, miR-378c, miR-365a-5p, miR-133a-3p, miR-1306-5p, let-7d, miR-30a-5p, miR-134, miR-345-3p, miR-214-5p, miR-378b, miR-482-3p, miR-7641, miR-107, miR-17-3p, miR-novel\_78, miR-548w, miR-126b-5p, miR-182-5p, miR-3431, miR-300-3p, miR-505-5p, miR-129-1-3p, miR-455-3p, miR-532-3p, miR-140-3p, miR-7144-5p, miR-129-2-3p, miR-224-5p, miR-450b-5p, miR-224-5p, miR-182-5p

GPATCH4 ENSOARGO(G patch

WFDC8 ENSOARGO(WAP four

miR-345-3p, miR-3064-5p, miR-376c-3p, miR-125b-2-3p, miR-29b-1-5p, miR-2284y, miR-542-5p, miR-92a-1-5p, miR-422a, miR-3071-3p, miR-127-5p, miR-21-3p, miR-152-3p, miR-212-5p, miR-148b-3p, miR-483-3p, miR-378h, miR-129-1-3p, novel\_83, miR-378i, miR-1197-5p, miR-140-3p, miR-378a-3p, miR-5703, miR-33b-3p, miR-2284u, miR-129-2-3p, miR-3074-5p, miR-378c, miR-214, miR-378c, miR-2332, miR-410-5p, miR-100-3p, miR-2331-3p, miR-378a-3p, miR-296-3p, miR-1271, miR-2285aa, miR-2355-5p, miR-370-3p, miR-139-5p, miR-376e-3p, miR-376c-3p, miR-22-3p, miR-21a-3p, let-7g-3p, miR-671-5p, miR-485-5p, miR-2330-5p, let-7c-3p, miR-378d, miR-8485, miR-296-3p, miR-296-3p, miR-7-5p, miR-29b-1-5p, miR-3141, miR-483-3p, miR-3085-3p, miR-214-3p, miR-542-5p, miR-548w, miR-2300a-5p, miR-421, novel\_116, miR-216a-3p, miR-194-3p, miR-7b-5p, miR-1285, miR-541, miR-223-3p, miR-378b, miR-6529a, miR-30b-3p, miR-22-3p, miR-30b-3p, miR-378c, miR-188-5p, miR-541-3p, novel\_101, miR-542-5p, novel\_82, miR-6123, miR-3074-5p, miR-2319b, miR-3064-5p, miR-139-5p, miR-2284g, miR-3120-3p, miR-378e, miR-669, miR-203-3p, miR-148a-3p, miR-3141, miR-3065-5p, miR-150-5p, miR-1291, miR-378f, miR-542-5p, miR-323c, miR-502-5p, miR-16a, miR-16a, miR-206, miR-6119-3p, miR-203b-5p, miR-329-5p, novel\_68, miR-3120-3p, miR-320b, miR-374c-3p, miR-323a-5p, miR-181b-3p, miR-320c, miR-677, miR-2387, miR-378b, miR-150-5p, miR-1306, miR-107, miR-505-3p, miR-195a-5p, miR-2319a, miR-493-5p, miR-363-5p, miR-654-3p, let-7a-2-3p, miR-539-3p, miR-296-3p, miR-296-3p, miR-105-5p, miR-378a-5p, miR-1343-5p, miR-103a-3p, miR-432-5p, miR-103, miR-149-5p, miR-432, miR-145a-5p, miR-138, miR-16b, miR-2284x, miR-27b-3p, miR-26a-2-3p, miR-497-5p, miR-16-5p, miR-6128, miR-1197-3p, miR-145-3p, miR-138-5p, miR-134-5p, miR-487a-3p, miR-2285aa, miR-301, miR-3154, miR-320a, miR-200a-5p, let-7g-3p, miR-1, miR-30a-3p, miR-29b-2-5p, miR-3065-3p, miR-6119-5p, miR-664-3p, miR-2285af, miR-2898, miR-107, miR-222, miR-7641, miR-2411-5p, miR-322-5p, miR-134-5p, miR-582-3p, miR-134, miR-1343-5p, let-7a-2-3p, miR-105-2, miR-3956-3p, novel\_60, miR-3059-5p, miR-7705, miR-301a-5p, miR-20a-3p, miR-664b, miR-139-5p, miR-489, miR-27a-3p, miR-203-3p, miR-221, miR-129b-5p, miR-381-3p, novel\_94, miR-493-5p, miR-424-5p, miR-652-5p, miR-4532, miR-1306-5p, miR-320b, miR-182-5p, miR-16b, miR-29b-1-5p, miR-542-5p, miR-153-3p, miR-105-1, miR-27a-3p, miR-181b-2-3p, miR-145b, miR-1298-3p, miR-153, miR-421, miR-221-3p, miR-9788-3p, miR-301b-5p, miR-1a-3p, miR-2426, miR-206-3p, miR-98-3p, miR-30e-3p, miR-222-3p, let-7b-3p, miR-29b-2-5p, miR-664a-5p, miR-30a-3p, miR-487b-5p, novel\_74, miR-424-5p, miR-182-5p, miR-296-3p, miR-3065-3p, miR-139-5p, miR-323-5p, miR-582-5p, miR-15b-5p, let-7f-1-3p, miR-21a-3p, miR-433-3p, miR-129b-3p, miR-1827, miR-582-5p, miR-625-5p, miR-543-3p, miR-487a, miR-105-3p, miR-329a-5p, miR-29b-1-5p, miR-143-3p, miR-2424, miR-2411, miR-2285p, miR-542-5p, miR-210-5p, miR-320d, miR-21-3p, miR-1277-5p, miR-505-3p, miR-30d-3p, miR-

RMND5B ENSOARGO required

NSMCE4A ENSOARGO NSE4 homolog

miR-411, miR-216a-3p, miR-7144-5p, miR-1248, miR-677, miR-6535, miR-22-3p, miR-500-3p, miR-181b-3p, miR-2433, miR-5100, miR-1973, miR-425-5p, miR-450a-5p, miR-486b-3p, miR-130b-5p, miR-224-5p, miR-502-3p, miR-2408, miR-7b-5p, miR-22-3p, miR-501-3p, miR-140-3p, miR-501-3p, miR-2426, miR-128-3p, novel\_78, miR-181b-2-3p, miR-505-5p, miR-147a, novel\_121, miR-224-5p, miR-7-5p, miR-2397-5p, miR-2898, miR-378a-5p, miR-3955-3p, miR-466i-5p, miR-130b-5p, let-7c-3p, miR-363-5p, miR-181b-1-3p, miR-130a-5p, miR-125b-2-3p, miR-8485, miR-486-3p, miR-450c-5p  
miR-431, miR-2285ad, miR-582-3p, miR-322-5p, miR-758-5p, miR-30a-5p, miR-1290, miR-3064-5p, miR-181a-2-3p, miR-4286, miR-200a, miR-490-3p, miR-450b-5p, miR-380-5p, miR-217, miR-2285af, miR-107, miR-543-5p, miR-17-3p, miR-127-5p, miR-2355-5p, miR-2285aa, miR-370-3p, miR-574-5p, miR-487a-3p, miR-137-3p, miR-2448-3p, miR-1814c, miR-345-5p, miR-16-5p, miR-144-5p, novel\_63, miR-204-5p, miR-31-5p, miR-103a-3p, miR-103, miR-432-5p, miR-22-3p, miR-432, miR-497-5p, miR-26a-2-3p, miR-188-5p, miR-16b, miR-380-5p, miR-539-3p, let-7j, miR-345-5p, miR-654-3p, miR-377-3p, miR-660, miR-3120-3p, miR-670-3p, miR-2387, miR-195a-5p, miR-107, novel\_101, miR-17-3p, miR-374c-5p, miR-211, miR-16a, miR-15a, miR-133a-5p, miR-656-5p, miR-502b, miR-485-3p, miR-548e-3p, miR-7859, miR-487a-3p, miR-15a-5p, miR-2904, miR-217-5p, novel\_133, miR-664-5p, miR-133a-3p, miR-361-5p, miR-369-3p, miR-487a, miR-618, miR-221-5p, miR-216b-3p, miR-154a-3p, miR-140-5p, miR-221-5p, miR-660-5p, miR-548o-3p, novel\_25, miR-22-3p, miR-15b-5p, miR-377-3p, miR-2284s, miR-129b-3p, miR-345-5p, miR-154b-3p, miR-145a-3p, miR-320e, miR-424-5p, miR-129-5p, miR-17-3p, miR-758-3p, miR-2284r, miR-101a-5p, miR-33a-5p, miR-424-5p, miR-758-3p, miR-2310, miR-16b, miR-431-5p, miR-103a-2-5p, miR-3085-3p, miR-3955-3p, miR-211-5p, miR-7977, miR-3064-5p, miR-452-3p, miR-20a-3p, miR-144-5p, miR-7857-3p, miR-2483-3p, miR-378j, miR-219a-5p, miR-3059-5p, miR-2285y, miR-107-5p, miR-218-5p, miR-2285n, miR-154-3p, miR-3968, miR-3958-3p, miR-4726-5p

ZNF618 ENSOARGO(zinc fin.

BBS9 ENSOARGO(Bardet-B

miR-2478, miR-199a-5p, novel\_39, miR-306b-3p, miR-490-3p, miR-450c-5p, miR-181b-5p, miR-6536, miR-107, novel\_96, miR-6119-5p, miR-125a-3p, miR-30f, miR-339a, miR-505-5p, miR-378h, miR-214-5p, miR-129-1-3p, miR-6517, miR-412, novel\_79, miR-7641, miR-411-3p, miR-196a-5p, miR-330-5p, miR-30a-5p, miR-1197-3p, miR-378c, novel\_42, miR-193a-5p, miR-6128, miR-767-5p, miR-592, miR-486b-3p, miR-331-3p, miR-199a-5p, miR-154b-5p, miR-2355-5p, miR-2285aa, miR-615-5p, miR-876-3p, miR-767, miR-329a, miR-3074-1-3p, miR-1248, miR-30e-5p, miR-503-3p, miR-296-3p, miR-503-3p, miR-363-5p, miR-196b-5p, miR-378a-5p, miR-296-3p, miR-377-3p, novel\_51, miR-412-5p, miR-3431, novel\_116, miR-2355-3p, miR-103, miR-103a-3p, miR-339-5p, miR-377-5p, miR-26b-3p, miR-219a-1-3p, miR-16-1-3p, miR-2284x, miR-7862, miR-2889, miR-873a-5p, miR-1434-3p, miR-181a-5p, miR-197-3p, miR-24-3p, miR-326-3p, miR-199b-5p, miR-1839-3p, novel\_101, miR-128-1-5p, miR-379-3p, miR-22-5p, miR-502-5p, miR-6529b, miR-670-3p, miR-669, miR-216b-3p, miR-655-5p, miR-3120-3p, miR-1291, miR-107, miR-2319a, miR-378f, miR-377-5p, miR-486-3p, miR-216c-5p, miR-195a-3p, miR-30b, novel\_17, miR-422a, miR-487a-3p, miR-222-5p, miR-199a-3p, miR-485-3p, miR-664-5p, miR-16-1-3p, miR-378i, miR-30c-5p, miR-362-3p, miR-2904, miR-1197-5p, miR-378a-3p, miR-5703, miR-6525, miR-6134, miR-338-3p, miR-181c-5p, miR-378c, miR-145a-3p, miR-4510, miR-129-2-3p, miR-665-5p, miR-4492, miR-324-3p, miR-320e, miR-377-3p, miR-139-5p, miR-216b-5p, miR-6130, miR-378a-3p, miR-216b-3p, miR-3065-3p, miR-339b, miR-30f, miR-186-5p, miR-21a-3p, miR-30d-5p, miR-378d, miR-4532, miR-193a, miR-1839-3p, miR-491-5p, miR-487b-5p, miR-199b-5p, miR-199a-3p, miR-5126, miR-326, miR-362-3p, miR-455-3p, miR-1343-3p, novel\_78, miR-378c, miR-362-3p, miR-329a-3p, miR-378h, miR-412-3p, miR-125b-2-3p, miR-3187-3p, miR-432-3p, miR-378d, miR-424-5p, miR-1185-5p, miR-455-5p, miR-16b, miR-326, miR-103, miR-2459, miR-145b, novel\_4, miR-103a-3p, miR-1343-3p, miR-497-5p, miR-455-5p, miR-378c, miR-16b, miR-450b-5p, miR-145a-5p, miR-378b, miR-326-3p, miR-2285f, miR-203b-5p, miR-147-5p, novel\_1, miR-16a, miR-218-5p, miR-15a, miR-142b, miR-6535, miR-378e, novel\_69, miR-378b, miR-7975, miR-195a-5p, miR-378f, miR-107, miR-129b-5p, miR-2285ab, miR-107, miR-21-3p, miR-2898, miR-422a, miR-129-1-3p, miR-383-5p, miR-322-5p, miR-15a-5p, miR-378h, miR-6516-5p, miR-582-3p, miR-142-3p, miR-33b-3p, miR-330-5p, miR-378a-3p, miR-378i, miR-2300b-3p, miR-378c, miR-16-5p, miR-378c, miR-129-2-3p, miR-145a-3p, miR-424-5p, miR-767-5p, miR-15b-5p, miR-6516, miR-2285aa, miR-378a-3p, miR-1248, novel\_99, miR-2312, miR-767, miR-3154

SUPT5H ENSOARGO(suppress)

PREPL ENSOARGO(prolyl e)



miR-188-5p, miR-22-3p, miR-542-3p, miR-7b-5p, miR-1843b-5p, novel\_116, miR-3431, miR-134-3p, miR-339-5p, miR-31-5p, miR-193a-3p, novel\_51, miR-105-5p, miR-377-3p, miR-7-5p, miR-432-3p, miR-628-5p, miR-380-5p, miR-378f, let-7e-5p, miR-412-3p, miR-3970, miR-1306, miR-150-5p, miR-6535, miR-669, miR-374c-3p, miR-216b-3p, novel\_68, miR-29a, miR-4324, miR-29c-3p, miR-758-5p, miR-1839-3p, miR-193b-3p, miR-335-5p, miR-330-5p, miR-1343-5p, miR-129-1-3p, miR-758-5p, miR-505-5p, miR-9-5p, novel\_79, miR-412, miR-6517, miR-2285ad, novel\_127, novel\_96, miR-127-5p, let-7f-5p, miR-125a-3p, let-7g, miR-200a, miR-29a-5p, miR-1248, miR-876-3p, miR-767, miR-301, miR-376c-3p, miR-125a, miR-2285aa, miR-2355-5p, miR-874-3p, miR-125b-5p, miR-2433, miR-1260b, miR-193a-5p, miR-1839-5p, miR-1388-5p, miR-301b-5p, miR-455-3p, miR-147a, miR-1298-3p, miR-145b, miR-1343-3p, miR-214-3p, miR-491-5p, miR-8485, miR-378d, miR-127-3p, miR-1983, miR-504, miR-203-3p, miR-3596, miR-378g, miR-211-5p, miR-4792, miR-3968, miR-301a-5p, novel\_82, miR-423-5p, novel\_111, miR-877-3p, miR-361-3p, miR-9-5p, miR-2284j, miR-184-3p, miR-493-3p, miR-378a-3p, miR-1961, miR-378i, miR-7859, miR-212-5p, miR-380-5p, miR-18a-3p, let-7k, miR-98-5p, miR-202-5p, miR-422a, miR-92a-1-5p, miR-324-3p, novel\_17, miR-618, miR-486-3p, miR-376c-3p, miR-377-5p, miR-664b-3p, miR-345-3p, miR-1827, miR-186-5p, miR-339b, miR-2285c, let-7i-5p, miR-376e-3p, miR-377-3p, miR-10a, miR-216b-3p, miR-548o-3p, miR-504-5p, miR-874-5p, miR-4492, miR-665, let-7f, miR-2285j, miR-3184-5p, miR-346, miR-224-5p, miR-6525, miR-769-5p, miR-665-5p, miR-214, miR-129-2-3p, let-7b, miR-455-5p, miR-1260b, miR-138, miR-30b-3p, miR-29b, miR-2284ab, miR-145a-5p, miR-873a-5p, miR-185-5p, let-7g-5p, miR-2285g, miR-2284d, miR-26b-3p, miR-377-5p, miR-133b-5p, miR-125a-5p, miR-1343-5p, miR-455-5p, miR-483-3p, miR-2404, miR-483-3p, miR-101c, novel\_82, miR-218-5p, miR-107-5p, miR-29a, miR-628-3p, miR-29c-3p, miR-194b-5p, miR-1193, miR-211, miR-18b, miR-3591-3p, miR-135b-5p, miR-146b-5p, miR-10a-5p, miR-211-5p, miR-29a-3p, miR-3596, miR-181b-3p, miR-4443, miR-677, miR-146a, miR-224-5p, novel\_51, miR-194a, miR-2331-5p, miR-330-3p, miR-103a-2-5p, miR-146b, miR-6240, miR-33a-5p, miR-652-5p, miR-101-5p, miR-8485, miR-10b, miR-194-5p, miR-22-3p, miR-450c-3p, miR-29b, miR-138, miR-330-3p, miR-1343-3p, miR-181b-2-3p, miR-370-5p, miR-29b-3p, miR-135a-5p, miR-6740-5p, miR-132-5p, miR-664a, miR-767-5p, miR-138-5p, miR-450b-3p, miR-204-5p, miR-103b, miR-224-5p, miR-10b-5p, miR-450a-1-3p, miR-488-3p, miR-18a, miR-18a-5p, miR-767, miR-7144-5p, miR-552-3p, miR-370-5p, miR-21-3p, miR-10a, miR-22-3p, miR-125a-3p, novel\_17, miR-6119-5p, miR-196a-3p, miR-324-3p, miR-2898, miR-181b-1-3p, miR-125b-2-3p, miR-146a-5p, miR-193b-5p, miR-29d-3p, miR-10a-5p, miR-6517, miR-18b-5p, miR-24-2-5p, miR-450a-1-3p, miR-532-3p, miR-1247-5p

miR-216a-5p, miR-125b, miR-320d, miR-760-3p, miR-466i-5p, miR-221-5p, miR-34b-5p, miR-21-3p, miR-299-3p, miR-2887, miR-29b-1-5p, miR-130a-5p, miR-146a-5p, miR-362-3p, miR-1246, miR-2904, miR-188-3p, miR-1197-5p, miR-140-3p, miR-5703, miR-4429, miR-548e-3p, miR-148b-3p, miR-532-3p, miR-616-3p, miR-19b-1-5p, miR-320e, miR-29b-2-5p, miR-450b-3p, miR-17-3p, miR-664a, miR-708-5p, miR-487a-5p, miR-378c, miR-539-5p, miR-145a-3p, miR-3074-2-3p, miR-10b-5p, miR-338-3p, miR-21a-3p, miR-30f, novel\_99, miR-140-5p, miR-221-5p, miR-378a-3p, miR-21-3p, miR-3065-3p, miR-532-5p, miR-182-5p, miR-6516, miR-656-3p, novel\_32, miR-22-3p, miR-320b, miR-1306-5p, miR-326, miR-362-3p, miR-3085-3p, miR-3955-3p, miR-2330-5p, miR-376b, miR-30c-1-3p, miR-193a, miR-3187-3p, miR-491-3p, miR-378b, miR-484, miR-10b, miR-378c, miR-101a-5p, miR-2284aa, miR-16-2-3p, miR-3120-5p, miR-105-1, miR-2300a-5p, novel\_4, miR-5010-3p, miR-222-5p, miR-9788-3p, miR-30b-5p, miR-769-5p, miR-371a-5p, miR-3059-5p, novel\_60, miR-541-3p, miR-199b-5p, miR-3064-5p, miR-7977, miR-378e, miR-7857-3p, miR-1260a, miR-30c-2-3p, miR-339a, miR-2898, miR-17-3p, miR-191-3p, miR-3529-3p, miR-29b-2-5p, miR-28b, miR-3065-3p, miR-199a-5p, miR-490-3p, miR-134, miR-29d-3p, miR-30a-5p, miR-105-2, miR-10a-5p, miR-483-3p, miR-378h, miR-6516-5p, miR-545-5p, miR-29b-3p, miR-410-5p, miR-331-3p, miR-409-3p, miR-138-5p, miR-28-5p, miR-204-5p, miR-6128, miR-365a-5p, miR-378c, miR-3154, miR-320a, miR-10b-3p, miR-7144-5p, miR-671-5p, miR-1814c, miR-141-3p, miR-34c-5p, miR-769, miR-199a-5p, miR-154b-5p, miR-190a, miR-330-3p, miR-452-5p, miR-125a-5p, miR-1343-5p, miR-130b-5p, miR-363-5p, miR-1434-3p, miR-1285, miR-138, miR-29b, miR-1260b, miR-219a-1-3p, miR-122-3p, miR-432-5p, miR-185-5p, miR-502-5p, miR-34c, novel\_1, miR-199c, miR-147-5p, novel\_101, miR-17-3p, miR-211, miR-371b-3p, miR-149a, miR-

miR-544-5p, miR-1983, miR-136-5p, miR-181d-5p, miR-194b-5p, miR-363-3p, miR-3059-5p, miR-107-5p, miR-2285n, miR-154-3p, miR-335, miR-181b-2-3p, miR-1343-3p, miR-151a-3p, miR-421, miR-2459, miR-216a-3p, miR-4791, miR-33a-5p, miR-494-3p, miR-1b-5p, miR-2310, miR-182-5p, miR-29b-1-5p, novel\_103, miR-103a-2-5p, miR-182-5p, miR-532-5p, miR-21-3p, miR-154a-3p, miR-548o-3p, miR-2331-3p, miR-32-5p, miR-376e-3p, miR-377-3p, miR-27b-5p, novel\_99, miR-543-3p, miR-154b-3p, miR-539-5p, miR-181c-5p, miR-224-5p, miR-664a-5p, miR-3604, miR-151-3p, miR-130b-5p, miR-485-3p, miR-505-3p, miR-487a-3p, miR-1197-5p, miR-1193, miR-217-5p, miR-191, miR-218-1-3p, miR-487a, miR-216c-5p, miR-143-3p, miR-2424, miR-181b-1-3p, miR-376c-3p, miR-376a-5p, miR-29b-1-5p, miR-125b, miR-2285p, miR-196a-3p, miR-299-3p, miR-320b, miR-181b-3p, miR-677, miR-411b-3p, miR-299b-3p, miR-374c-3p, miR-2404, miR-3591-3p, miR-3970, miR-505-3p, miR-412-3p, miR-1291, miR-3957-3p, miR-335-5p, miR-24-3p, miR-371b-3p, miR-133a-5p, miR-4324, miR-502b, miR-203b-5p, miR-625-3p, novel\_1, miR-6119-3p, miR-92a-3p, miR-3955-5p, miR-2355-3p, miR-6238, miR-185-5p, miR-3535, miR-432-5p, miR-194-5p, miR-374b-3p, miR-181a-5p, miR-223-3p, miR-432, miR-2284x, miR-6240, miR-130b-5p, miR-539-3p, miR-654-3p, novel\_51, miR-194a, miR-32, miR-330-3p, miR-377-3p, miR-224-5p, miR-125a-5p, miR-125a, miR-487a-3p, miR-154b-5p, miR-376c-3p, miR-365a-3p, miR-25-3p, miR-200a-5p, miR-1814c, miR-190a-3p, miR-125b-5p, miR-135a-1-3p, miR-34c-3p, miR-191-5p, miR-299a-3p, miR-486-5p, miR-3591-5p, miR-4286, miR-2285b, miR-192-3p, miR-92b-3p, miR-217, miR-205-5p, miR-92a-3p, miR-127-5p, miR-181b-5p

TDRD3 ENSOARGO( tudor do

miR-342-3p, miR-193b-3p, miR-17-3p, miR-449a, miR-326-3p, miR-15a, miR-142b, miR-28c, miR-576-3p, miR-16a, miR-34c, miR-128-1-5p, miR-656-5p, miR-502b, novel\_68, miR-3074-5p, miR-146b-3p, miR-34b, miR-374c-3p, miR-299b-3p, miR-669, miR-2285ab, miR-18b, miR-2387, miR-216a-3p, miR-1291, miR-9851-3p, miR-2319a, miR-195a-5p, miR-6395, miR-668-3p, miR-363-5p, miR-654-3p, miR-432-3p, let-7a-2-3p, miR-345-5p, miR-503-5p, miR-377-3p, miR-365b-5p, miR-105-5p, miR-194a, miR-378a-5p, miR-125a-5p, miR-106b-3p, miR-193a-3p, miR-665, miR-3535, miR-2285g, miR-134-3p, miR-185-5p, miR-503-5p, novel\_116, miR-653, miR-1843b-5p, miR-22-3p, miR-374b-3p, miR-194-5p, miR-30b-3p, miR-16b, miR-1260b, miR-26a-2-3p, miR-497-5p, miR-188-5p, novel\_42, miR-1306-5p, miR-16-5p, miR-193a-5p, miR-133a-3p, miR-1260b, miR-145-3p, miR-365a-5p, miR-34c-3p, miR-2433, miR-125b-5p, miR-331-3p, miR-767-5p, miR-134-5p, miR-486b-3p, miR-28-5p, miR-574-5p, miR-2355-5p, miR-125a, miR-615-5p, miR-34c-5p, miR-374c-3p, miR-488-3p, miR-18a, miR-767, miR-2474, miR-10b-3p, miR-345-5p, let-7g-3p, miR-485-5p, miR-3529-3p, miR-3064-5p, miR-4286, miR-28b, miR-200a, miR-3065-3p, novel\_39, miR-490-3p, miR-1271-3p, miR-2285af, miR-1260a, miR-664-3p, miR-125a-3p, miR-217, miR-17-3p, miR-450a-2-3p, novel\_96, miR-2285ad, miR-299a-3p, miR-18b-5p, miR-322-5p, miR-2411-5p, miR-134-5p, miR-134, miR-3578, miR-7134-5p, miR-330-5p, miR-582-3p, miR-105-2, miR-155-5p, miR-128-3p, let-7a-2-3p, miR-2447, miR-541-3p, miR-2285f, miR-194b-5p, miR-361-3p, miR-877-3p, novel\_111, miR-2285n, novel\_82, miR-2440, miR-107-5p, miR-301a-5p, miR-664b, miR-3064-5p, miR-2319b, miR-541-5p, miR-2285u, miR-378g, miR-25, miR-2483-3p, miR-203-3p, miR-361-3p, miR-378j, miR-668-5p, miR-136-5p, miR-1388-3p, miR-194a, miR-197-3p, miR-194-5p, miR-676-3p, miR-376b, miR-

miR-147-5p, miR-625-3p, miR-20a-5p, miR-24-3p, miR-211, miR-3957-3p, miR-410-5p, miR-378f, miR-9851-3p, miR-146b-5p, miR-2285ab, miR-18a-3p, miR-3065-5p, miR-1306, novel\_69, miR-2404, miR-296-3p, miR-146a, miR-106a-5p, novel\_51, miR-17-5p, miR-455-5p, miR-365b-5p, miR-296-3p, miR-668-3p, miR-16-1-3p, miR-2284x, miR-188-5p, miR-455-5p, miR-4508, miR-1434-3p, miR-19b-2-5p, miR-3071-5p, novel\_23, miR-2285g, miR-20b, miR-194-3p, miR-31-5p, miR-204-5p, novel\_63, miR-2433, miR-93, miR-378c, miR-365a-5p, miR-1306-5p, miR-6128, miR-329a, miR-10b-3p, miR-1814c, miR-485-5p, miR-20b-5p, miR-7144-5p, miR-301, miR-424-3p, miR-17-5p, miR-3154, miR-93-5p, miR-769, miR-300-3p, miR-376c-3p, miR-874-3p, miR-141-3p, miR-2355-5p, miR-127-5p, miR-6536, novel\_96, miR-200a-3p, novel\_127, miR-664-3p, miR-205-5p, miR-3065-3p, novel\_39, miR-378h, miR-2285ad, miR-1224-5p, miR-2285n, novel\_82, miR-769-5p, miR-2285y, miR-361-3p, miR-3956-3p, novel\_60, miR-2447, miR-2285f, miR-544-5p, miR-378j, miR-489, miR-499a-3p, miR-378e, miR-1185-2-3p, miR-664b, miR-211-5p, miR-491-5p, miR-146b, miR-5126, miR-1306-5p, miR-106b-5p, miR-362-3p, miR-505, miR-378d, miR-2310, miR-193a, miR-106a-5p, miR-2426, miR-450b-5p, miR-378c, miR-362-3p, miR-378b, miR-329-3p, miR-2285e, miR-1185-3p, novel\_4, miR-409b, miR-548w, miR-1343-3p, miR-664a, miR-129-5p, miR-2285j, miR-664a-5p, miR-665, miR-324-3p, miR-19b-1-5p, miR-769-5p, miR-378c, miR-3958-5p, miR-2312, miR-625-5p, miR-2285c, miR-27b-5p, miR-376e-3p, miR-2284s, miR-499b-3p, miR-204-3p, miR-378a-3p, miR-3065-3p, miR-106a, miR-1277-5p, miR-30b-3p, miR-2285p, miR-422a, miR-216a-5p, miR-376c-3p, miR-376a-5p, miR-146a-5p, miR-105-3p, miR-20a, miR-16-1-3p, miR-362-3p, miR-378i, miR-1193, miR-1197-5p, miR-140-3p, miR-378a-3p, miR-188-3p, miR-785g, novel\_83, miR-106a, miR-18a-3p, miR-3968, miR-301a-5p, miR-502-5p, miR-374c-5p, miR-2428, miR-362-5p, miR-2285x, miR-541-3p, miR-150-5p, miR-1306, miR-669, miR-6535, miR-2483-3p, miR-374c-3p, miR-320b, miR-216b-3p, miR-452-3p, miR-491-5p, miR-182-5p, miR-1306-5p, novel\_103, miR-345-5p, miR-124a, miR-2330-5p, miR-3120-5p, miR-16-1-3p, miR-197-3p, miR-484, miR-301b-5p, miR-541, miR-500-5p, novel\_4, miR-4492, miR-6740-5p, miR-3969, miR-665, miR-320e, miR-655-3p, miR-6525, miR-500b-5p, miR-346, miR-1306-5p, miR-625-5p, miR-345-5p, miR-345-5p, miR-129b-3p, miR-655, miR-3154, miR-362-5p, miR-381-3p, miR-374c-3p, miR-300-3p, miR-182-5p, miR-296-3p, miR-21-3p, novel\_96, miR-500a-5p, miR-185-3p, miR-2285af, miR-6119-5p, miR-192-3p, miR-2887, miR-4286, miR-216c-5p, miR-16-1-3p, miR-142-3p, miR-582-3p, miR-300, miR-2904, miR-124-3p, miR-2408, miR-193b-5p, miR-2300b-3p, miR-1b-3p

miR-486b-3p, miR-4492, miR-874-5p, miR-665, miR-3969, miR-132-5p, miR-331-3p, miR-551b-3p, miR-2433, miR-6134, miR-122-5p, miR-224-5p, miR-346, miR-1260b, miR-1197-3p, miR-6525, miR-214, miR-665-5p, miR-6128, miR-3074-5p, miR-1827, miR-485-5p, miR-671-5p, miR-23a-5p, miR-329a, miR-129b-3p, miR-200a-5p, miR-22-3p, miR-3065-3p, miR-2355-5p, miR-370-3p, miR-874-3p, miR-574-5p, miR-140-5p, miR-299-3p, novel\_127, novel\_96, miR-21-3p, miR-760-3p, miR-466i-5p, miR-185-3p, miR-1260a, miR-143-3p, miR-486-3p, miR-3065-3p, miR-130a-5p, miR-125b-2-3p, miR-4286, miR-2887, miR-3064-5p, miR-378d, miR-1197-5p, miR-330-5p, miR-362-3p, miR-193b-5p, miR-486-5p, miR-1247-5p, miR-431, miR-18a-3p, miR-299a-3p, miR-6123, miR-147-5p, miR-128-1-5p, miR-3968, miR-4726-5p, miR-4324, miR-326-3p, novel\_111, miR-361-3p, miR-219a-5p, miR-541-3p, miR-136-5p, miR-18a-3p, miR-140-5p, miR-361-3p, miR-489, novel\_69, miR-299b-3p, miR-670-3p, miR-7977, miR-3074-5p, miR-3064-5p, novel\_68, miR-214-3p, miR-3085-3p, miR-491-5p, miR-455-5p, miR-362-3p, miR-5126, novel\_103, miR-326, miR-431-5p, miR-224-5p, miR-432-3p, miR-744-5p, miR-455-5p, miR-3120-5p, miR-4508, miR-1260b, miR-362-3p, miR-125b-2-3p, miR-22-3p, miR-541, miR-1285, miR-873a-5p, miR-329-3p, miR-484, miR-296-5p, miR-149-5p, miR-455-3p, miR-147a, novel\_78, miR-1343-3p, miR-335, novel\_1, miR-379-3p, miR-628-3p, miR-2285t, miR-34c, novel\_111, miR-211, miR-449a, novel\_27, miR-374c-5p, miR-335-5p, miR-17-3p, miR-194b-5p, miR-19a-3p, miR-299b-5p, miR-378f, miR-2387, miR-3591-3p, miR-381-3p, miR-216a-3p, miR-34b, miR-378e, miR-320c, miR-329-5p, miR-2319b, miR-211-5p, miR-3120-3p, miR-26b-5p, miR-320b, miR-2331-5p, miR-194a, miR-2957, miR-505, miR-22841, miR-378d, miR-124a, miR-544a, miR-1260b, miR-378c, miR-432, miR-378b, miR-2284r, miR-194-5p, miR-432-5p, miR-544b, miR-149-5p, miR-148b-5p, miR-194-3p, miR-17-3p, miR-28-5p, miR-204-5p, miR-191-5p, miR-874-5p, miR-708-5p, miR-4492, miR-30e-3p, let-7b-3p, miR-30a-3p, miR-1260b, miR-1197-3p, miR-378c, miR-129-2-3p, miR-1306-5p, miR-378c, miR-539-5p, miR-3074-2-3p, miR-1248, let-7f-1-3p, miR-320a, miR-27b-5p, miR-544-3p, miR-34c-5p, miR-324-5p, miR-548o-3p, miR-545-3p, miR-378a-3p, miR-2355-5p, miR-3065-3p, miR-21-3p, miR-127-5p, miR-320d, miR-17-3p, miR-34b-5p, miR-26a-5p, miR-1260a, miR-122-3p, miR-422a, miR-148b-5p, miR-3065-3p, miR-105-3p, miR-183-5p, miR-329a-5p, miR-30a-3p, miR-19b-3p, miR-4429, miR-411-3p, let-7a-3p, miR-148a-5p, miR-34a-5p, miR-128-3p, miR-2300b-3p, miR-191, novel\_133, miR-378i, miR-378a-3p, miR-7134-5p, miR-124-3p, miR-378h, miR-302a-5p, miR-129-1-3p, miR-532-3p, miR-545-5p, miR-30d-3p

GUK1 ENSOARGO( guanylat

AGPAT5 ENSOARGO( 1-acylgl

miR-329-3p, miR-1434-3p, miR-125b-2-3p, miR-374b-3p, miR-362-3p, miR-16b, miR-219a-1-3p, miR-4508, miR-497-5p, miR-744-5p, miR-340-3p, miR-339-5p, miR-153, miR-134-3p, miR-221-3p, miR-2459, miR-362-3p, miR-3141, miR-16b, miR-199b-5p, miR-153-3p, miR-660, miR-214-3p, miR-1388-3p, miR-124a, miR-2330-5p, miR-494-3p, miR-424-5p, miR-676-3p, miR-491-3p, miR-221, miR-199b-5p, miR-3141, miR-335-3p, miR-9851-3p, miR-877-3p, miR-376a-2-5p, miR-195a-5p, miR-4792, miR-452-3p, miR-20a-3p, miR-329-5p, miR-2285u, miR-320b, miR-3596, miR-378g, miR-374c-3p, miR-299b-3p, miR-34b, miR-6535, miR-2285n, miR-15a, miR-34c, miR-1307-5p, miR-16a, miR-3059-5p, miR-24-3p, miR-449a, miR-1285-5p, miR-199b-5p, miR-126-3p, miR-362-3p, miR-124-3p, miR-2904, miR-582-3p, miR-34a-5p, miR-222, miR-2285ad, miR-299a-3p, miR-548e-3p, novel\_79, miR-30d-3p, miR-376a-5p, miR-212-5p, miR-7859, miR-322-5p, miR-15a-5p, miR-582-3p, novel\_17, miR-210-5p, miR-216a-5p, miR-185-3p, miR-339a, miR-202-5p, miR-34b-5p, miR-21-3p, miR-299-3p, miR-200a-3p, miR-329a-5p, miR-30a-3p, miR-664b-3p, miR-199a-5p, miR-2424, miR-129b-3p, miR-2474, miR-329a, miR-339b, miR-485-5p, miR-3957-5p, miR-2331-3p, miR-660-5p, miR-548o-3p, miR-2285aa, miR-141-3p, miR-34c-5p, miR-374c-3p, miR-656-3p, miR-199a-5p, miR-324-5p, miR-15b-5p, miR-3957, miR-222-3p, miR-30e-3p, miR-30a-3p, miR-3969, miR-320e, miR-6516-3p, miR-129-5p, miR-4492, miR-424-5p, miR-181a-2-3p, miR-16-5p, miR-6128, miR-214, miR-6134, miR-338-3p

miR-2433, miR-125b-5p, miR-331-3p, miR-486b-3p, miR-1306-5p, miR-193a-5p, miR-500b-5p, miR-381-3p, miR-30e-5p, miR-362-5p, miR-3154, miR-10b-3p, miR-2318, miR-485-5p, miR-671-5p, miR-874-3p, miR-2355-5p, miR-2285aa, miR-1271, miR-125a, miR-769, miR-154b-5p, miR-200c, miR-125a-3p, let-7c-5p, miR-17-3p, miR-200c-3p, miR-127-5p, let-7f-5p, miR-191-3p, miR-181b-5p, novel\_127, novel\_96, miR-495-5p, miR-3064-5p, miR-2403, miR-450b-5p, let-7g, novel\_39, miR-1271-3p, miR-615-3p, miR-1290, miR-3578, miR-30a-5p, miR-330-5p, miR-501-3p, miR-582-3p, let-7d, miR-30c, miR-128-3p, miR-200b-3p, miR-222, miR-6517, miR-429-3p, miR-1271-5p, miR-2411-5p, miR-582-3p, miR-129-1-3p, miR-4324, miR-133a-5p, let-7i, miR-22-5p, miR-656-5p, miR-135a-2-3p, miR-342-3p, miR-542-5p, miR-17-3p, novel\_101, miR-326-3p, miR-2428, miR-3141, miR-1306, miR-18a-3p, miR-216a-3p, miR-378b, miR-412-3p, miR-146b-5p, let-7e-5p, miR-3074-5p, miR-329-5p, miR-320b, miR-669, miR-377-3p, miR-296-3p, miR-146a, miR-3141, miR-2285v, miR-194a, miR-125a-5p, miR-668-3p, miR-654-3p, miR-296-3p, miR-181a-5p, miR-1285, miR-542-3p, miR-223-3p, miR-2113, miR-194-5p, miR-16-1-3p, miR-27b-3p, miR-31-5p, miR-133b-5p, miR-377-5p, miR-134-3p, miR-185-5p, let-7g-5p, miR-149-5p, miR-6238, miR-544b, let-7f, miR-222-3p, miR-664a, miR-17-3p, miR-874-5p, miR-500, miR-4492, let-7b, miR-129-2-3p, miR-3184-3p, miR-3074-5p, miR-4510, miR-1271, miR-214, miR-769-5p, miR-3184-5p, let-7b-5p, miR-6134, miR-181c-5p, miR-500a-3p, miR-30d-5p, miR-30f, miR-1827, miR-2331-3p, miR-216b-3p, miR-296-3p, miR-182-5p, miR-544-3p, miR-499b-3p, miR-377-3p, miR-2284s, miR-139-5p, miR-6130, novel\_25, let-7i-5p, miR-30b, novel\_17, miR-2285p, miR-542-5p, miR-324-3p, miR-125b, miR-92a-1-5p, miR-185-3p, miR-98-5p, miR-30d, let-7k, miR-329a-5p, miR-2887, miR-376a-5p, miR-29b-1-5p, miR-377-5p, miR-146a-5p, miR-2411, miR-novel\_107, novel\_82, miR-4792, miR-548o-3p

CD4 ENSOARGO(T-cell s

VPS4B ENSOARGO(vacuolar

DCTN2 ENSOARGO(dynactin

miR-147-5p, novel\_82, miR-2285n, miR-301a-5p, miR-877-3p, miR-211, miR-361-3p, miR-3959-3p, miR-24-3p, miR-326-3p, miR-135a-2-3p, miR-3059-5p, miR-2285f, miR-504, miR-6395, miR-2285ab, miR-361-3p, miR-18a-3p, miR-129b-5p, miR-411b-3p, miR-3082-5p, miR-677, miR-181b-3p, novel\_68, miR-2319b, miR-10a-5p, miR-211-5p, miR-214-3p, miR-466f-3p, novel\_115, miR-326, miR-105-5p, miR-330-3p, novel\_51, miR-30c-1-3p, miR-345-5p, miR-491-3p, miR-758-3p, let-7a-2-3p, miR-130b-5p, miR-574-3p, miR-101b-3p, miR-6240, miR-668-3p, miR-16-1-3p, miR-3120-5p, miR-484, miR-4791, miR-10b, miR-301b-5p, miR-7857, miR-758-3p, miR-3071-5p, miR-3535, miR-149-5p, miR-105-1, miR-330-3p, novel\_78, miR-151a-3p, miR-339-5p, miR-500, miR-708-5p, miR-129-5p, miR-130b-5p, miR-204-5p, miR-28-5p, miR-30e-3p, miR-30a-3p, miR-324-3p, miR-151-3p, miR-10b-5p, miR-338-3p, miR-103b, miR-214, miR-345-5p, miR-339b, miR-345-5p, let-7g-3p, miR-21a-3p, miR-503-3p, miR-500a-3p, miR-10a, novel\_32, miR-504-5p, miR-30c-1-3p, miR-874-3p, miR-2355-5p, miR-760-3p, novel\_127, miR-543-5p, miR-21-3p, miR-324-3p, miR-30c-2-3p, miR-339a, miR-185-3p, miR-181b-1-3p, miR-30a-3p, miR-4286, miR-582-3p, miR-16-1-3p, miR-105-2, miR-218-1-3p, let-7a-2-3p, miR-10a-5p, miR-2300b-3p, miR-330-5p, miR-328-3p, miR-18a-3p, novel\_79, miR-30d-3p



miR-34b-3p, miR-10b-3p, miR-486-3p, miR-92a-1-5p, miR-219b-5p, miR-210-5p, miR-196a-3p, miR-21-3p, miR-221-5p, miR-34b-5p, miR-30b-3p, miR-466i-5p, miR-3600, miR-3960, miR-532-3p, novel\_83, miR-1247-5p, miR-148b-3p, miR-210-3p, miR-188-3p, miR-1246, miR-2408, miR-34a-5p, miR-378d, miR-19b-3p, miR-214, miR-425-5p, miR-3958-5p, miR-3074-5p, miR-4510, miR-145a-3p, miR-6525, miR-769-5p, miR-29b-2-5p, miR-665, miR-324-3p, miR-487a-5p, miR-4492, miR-874-5p, miR-664a, miR-17-3p, miR-487b-5p, novel\_74, miR-296-3p, miR-221-5p, miR-504-5p, miR-2331-3p, miR-22-3p, miR-6130, miR-2285c, miR-345-5p, miR-2312, miR-376b, miR-744-3p, miR-1839-3p, miR-193a, miR-4532, miR-326, miR-214-3p, miR-199b-5p, miR-25-5p, miR-487b-5p, miR-491-5p, miR-3085-3p, miR-27a-3p, miR-145b, novel\_4, novel\_78, miR-1343-3p, miR-2285e, miR-455-3p, miR-147a, miR-496-5p, miR-30b-3p, miR-7857, miR-1298-5p, miR-541, miR-296-5p, miR-101c, miR-2285f, miR-212-3p, miR-541-3p, miR-361-3p, miR-769-5p, miR-2440, miR-1843a-3p, miR-4726-5p, miR-3968, miR-7977, miR-211-5p, miR-452-3p, miR-3064-5p, miR-4443, miR-27a-3p, miR-378g, miR-199b-5p, miR-504, miR-3064-5p, miR-29b-2-5p, miR-2385-3p, miR-490-3p, novel\_39, miR-200a, miR-199a-5p, miR-125a-3p, novel\_96, miR-543-5p, miR-200a-3p, miR-152-3p, miR-107, miR-191-3p, miR-17-3p, miR-2898, novel\_121, miR-23b-5p, miR-330-5p, miR-29d-3p, miR-1343-5p, let-7a-2-3p, miR-300, miR-411-3p, miR-365a-5p, miR-29b-3p, miR-592, miR-486b-3p, miR-204-5p, miR-141-3p, miR-1271, miR-2355-5p, miR-370-3p, miR-874-3p, miR-3068-3p, miR-574-5p, miR-154b-5p, miR-199a-5p, miR-769, miR-34c-5p, miR-381-3p, miR-485-5p, miR-1248, miR-23a-5p, let-7g-3p, miR-345-5p, miR-2318, miR-876-3p, miR-628-5p, let-7a-2-3p, miR-345-5p, miR-654-3p, miR-2285r, novel\_51, miR-365b-5p, miR-106b-3p, miR-1343-5p, miR-124-5p, miR-378a-5p, miR-103a-3p, miR-1271-3p, miR-1b-5p, let-7j, miR-93, miR-20a, miR-1a-1-5p, miR-493-5p, miR-106a-5p, miR-1a-2-5p, miR-106a, miR-106b-5p, miR-17-5p, miR-106a-5p, miR-20a-5p, miR-1-5p, miR-20b, miR-106a, miR-2284x, miR-20b-5p, miR-493-5p, miR-33b-3p, miR-30b-3p, miR-17-5p, miR-30b-3p, miR-93-5p, miR-1434-3p, miR-1246 miR-107-5p, miR-1291, miR-206, miR-103a-2-5p, miR-3059-5p, miR-10b, miR-193a-5p, miR-665-5p, miR-206-3p miR-504, miR-1843b-5p, miR-2459, miR-7857-3p, miR-211-5p, miR-7977, miR-2355-5p, miR-3074-5p, miR-504-5p, miR-3064-5p, miR-204-5p, miR-760-3p, miR-3085-3p, miR-502-5p, miR-1271-3p, miR-211, miR-345-3p, miR-3064-5p, miR-3074-5p miR-374c-3p, miR-3965, miR-3596, miR-181b-3p, miR-203-3p, miR-677, miR-21-5p, miR-378d, miR-874-5p, miR-34c-3p, novel\_51, miR-21c

CST7 ENSOARGO(cystatin

XRN1 ENSOARGO(5' -3' ex

ACSBG2 ENSOARGO(acyl-CoA

POC1A ENSOARGO(POC1 cen

DMRTB1 ENSOARGO(DMRT-lik

miR-374a-3p, miR-539-5p, miR-425-5p, novel\_9, novel\_74, miR-374b-3p, miR-130b-5p, miR-454-3p, miR-31-3p, miR-29b-3p, miR-409-3p, miR-135a-5p, miR-193b-3p, miR-301a-3p, miR-2284s, miR-300-3p, miR-503-3p, miR-182-5p, miR-2285aa, miR-1248, miR-7144-5p, novel\_48, miR-381-3p, miR-320a, miR-137-3p, miR-143-3p, miR-329a-5p, miR-200c-3p, miR-466i-5p, miR-320d, miR-125a-3p, miR-200c, miR-30f, miR-216a-5p, miR-582-3p, miR-429-3p, miR-300, miR-4429, miR-218-1-3p, miR-3591-5p, miR-188-3p, miR-29d-3p, miR-301b-3p, miR-2284w, miR-1285-5p, novel\_101, miR-29c-3p, miR-193b-3p, miR-29a, miR-3958-3p, miR-374a-3p, miR-142b, miR-2483-3p, miR-29a-3p, miR-1185-2-3p, miR-320c, miR-329-5p, miR-3120-3p, miR-135b-5p, miR-6516-3p, miR-140-5p, miR-654-3p, miR-758-3p, miR-2310, miR-494-3p, miR-130b-5p, let-7f-2-3p, miR-487b-5p, miR-130b-3p, miR-193a-3p, miR-320b, miR-182-5p, miR-2320-3p, miR-1185-3p, miR-130a-3p, miR-219a-1-3p, miR-29b, miR-21b, miR-1434-3p, miR-2284r, miR-758-3p, miR-1296-5p, miR-3059-5p, miR-2285n, miR-2285t, miR-4726-5p, miR-7977, miR-3064-5p, miR-20a-3p, let-7d-5p, miR-378e, miR-3082-5p, miR-129b-5p, miR-33a-5p, let-7a-5p, miR-424-5p, miR-758-3p, miR-326, let-7e, novel\_124, miR-3085-3p, miR-5010-3p, miR-2300a-5p, miR-9788-3p, miR-412-3p, miR-30b-3p, miR-378b, miR-296-5p, miR-484, miR-378c, miR-2426, miR-378c, miR-145a-3p, let-7b-5p, miR-206-3p, miR-324-3p, miR-424-5p, miR-708-5p, miR-450b-3p, miR-155-5p, miR-221-5p, miR-378a-3p, novel\_32, miR-877-5p, miR-155-5p, miR-193b-3p, miR-21a-3p, let-7g-3p, miR-216c-5p, miR-216a-5p, miR-221-5p, miR-34b-5p, miR-30b-3p, miR-299-3p, miR-21-3p, miR-2284m, miR-760-3p, miR-466i-5p, miR-3600, novel\_83, miR-148b-3p, miR-200b, miR-15a-5p, miR-222-5p, miR-2904, miR-188-3p, miR-1197-5p, novel\_133, miR-2300b-3p, miR-378d, miR-19b-3p, miR-326-3p, miR-449a, miR-24-3p, miR-16a, miR-34c, let-7i, miR-15a, miR-656-5p, miR-128-1-5p, miR-320b, miR-2404, miR-34b, miR-195a-5p, miR-450b-3p, miR-19a-3p, miR-2483-5p, miR-296-3p, miR-190a, miR-455-5p, miR-503-5p, miR-466f-3p, miR-124-5p, miR-130a-3p, miR-665, miR-503-5p, miR-185-5p, let-7g-5p, miR-145a-5p, miR-455-5p, miR-744-5p, miR-30b-3p, miR-2284ab, miR-1260b, miR-6128, miR-1306-5p, miR-378c, miR-323-3p, miR-331-3p, miR-34c-3p, miR-5100, miR-486b-3p, miR-28-5p, miR-370-3p, miR-154b-5p, miR-2284n, miR-34c-5p, miR-2448-3p, miR-485-5p, miR-1, miR-181a-2-3p, miR-4286, miR-380-5p, miR-24-2-5p, let-7c-5p, miR-1260a, miR-200c, miR-450a-2-3p, miR-200c-3p, miR-24-2-5p, miR-378h, miR-483-3p, miR-200b-3p, let-7d, miR-2284j, miR-190b-5p, miR-423-5p, miR-877-3p, novel\_82, miR-2285u, miR-7689-3p, miR-24-1-5p, miR-3596, miR-378g, miR-493-5p, miR-1983, miR-544-5p, miR-3963, miR-504, miR-744-3p, miR-378d, miR-16b, miR-214-3p, miR-130b-3p, miR-145b, miR-1242-3p, miR-2450, miR-1208-3p, miR-1a-

miR-615-3p, miR-1193, miR-1197-5p, miR-29d-3p, miR-1306, miR-1260b, miR-1291, miR-29b, miR-1248, miR-125a, miR-216b-3p, miR-3065-3p, miR-29a-3p, miR-216b-5p, miR-615, miR-1306-5p, miR-1260a, miR-29b-3p, miR-125b, miR-107-5p, miR-92a-1-5p, miR-125b-5p, miR-29a, miR-466f-3p, miR-103a-2-5p, miR-125a-5p, miR-145a-3p, miR-29c-3p, miR-1260b, miR-877-3p, miR-3065-3p, miR-132-5p, miR-324-3p, miR-664a, miR-708-5p, miR-539-5p, miR-3074-5p, miR-145a-3p, miR-129-2-3p, miR-3074-2-3p, miR-142a-5p, miR-769-5p, miR-224-5p, miR-6134, miR-1827, miR-582-5p, miR-30c-1-3p, miR-3065-3p, miR-532-5p, miR-296-3p, miR-27a-5p, miR-377-3p, miR-582-5p, novel\_32, miR-125b, miR-320d, miR-106a, miR-34b-5p, miR-30b-3p, miR-2484, miR-2285w, miR-20a, miR-125b-2-3p, miR-146a-5p, miR-2432, miR-143-3p, novel\_133, miR-1246, miR-2904, miR-188-3p, miR-140-3p, miR-184-3p, miR-19b-3p, miR-4429, miR-361-5p, miR-378d, miR-34a-5p, miR-18a-3p, miR-106a, miR-1b-3p, miR-3600, miR-23b-3p, miR-95-3p, miR-23c, miR-2284h-5p, miR-2285y, miR-769-5p, miR-3968, miR-2285t, miR-212-3p, miR-541-3p, miR-452-5p, miR-361-3p, miR-361-3p, miR-1983, miR-664b, miR-3064-5p, miR-452-3p, miR-2319b, miR-20a-3p, miR-374b-5p, miR-378g, miR-27a-3p, miR-4443, miR-320b, miR-505, miR-106b-5p, miR-3085-3p, miR-146b, miR-1388-3p, miR-106a-5p, miR-23a-3p, miR-30c-1-3p, miR-484, miR-541, miR-412-3p, miR-101c, miR-3120-5p, miR-105-1, miR-199b-3p, miR-2300a-5p, miR-1343-3p, miR-27a-3p, miR-147a, miR-142-5p, miR-1298-3p, miR-216a-3p, miR-2284k, miR-125b-5p, miR-28-5p, miR-374b, miR-93, miR-93-5p, miR-17-5p, miR-23b, miR-320a, miR-3074-1-3p, novel\_48, miR-20b-5p, miR-23a-5p, miR-671-5p, miR-485-5p, miR-503-3p, miR-874-3p, miR-370-3p, miR-125a, miR-141-3p, miR-34c-5p, miR-769, miR-324-5p, miR-223-5p, miR-664-3p, miR-125a-3p, miR-30c-2-3p, novel\_127, miR-200a-3p, miR-3529-3p, miR-2385-3p, miR-3064-5p, miR-148b-5p, miR-3065-3p, miR-411-3p, miR-128-3p, miR-105-2, miR-2285ad, miR-6517, miR-412, miR-582-3p, miR-129-1-3p, novel\_121, miR-214-5p, miR-4324, miR-133a-5p, miR-20a-5p, miR-34c, miR-379-3p, miR-203b-5p, novel\_101, miR-371b-3p, miR-24-3p, miR-449a, miR-2284w, miR-18a-3p, miR-216a-3p, miR-412-3p, miR-19a-3p, miR-146b-5p, miR-3074-5p, miR-

CLEC16A ENSOARGO(C-type 1  
 FKBP15 ENSOARGO(FK506 bi

miR-504, miR-299b-5p, miR-1983, miR-544-5p, miR-493-5p, miR-3596, miR-378g, miR-1185-2-3p, miR-2319b, miR-4792, miR-211-5p, miR-2285u, miR-3968, miR-615, miR-218-5p, miR-301a-5p, miR-361-3p, miR-423-5p, miR-2447, miR-9-5p, miR-1388-5p, miR-301b-5p, miR-541, miR-1298-3p, miR-142-5p, miR-1185-3p, miR-148b-5p, miR-1343-3p, miR-330-3p, miR-181b-2-3p, miR-1185-5p, miR-431-5p, miR-199a-3p, novel\_19, miR-378d, miR-1388-3p, miR-124a, miR-339b, miR-1827, miR-625-5p, miR-1895, miR-2285c, miR-10a, miR-151b, miR-548o-3p, miR-504-5p, miR-2331-3p, miR-216b-3p, miR-129-5p, miR-4492, miR-874-5p, miR-30e-3p, miR-665, miR-30a-3p, miR-142a-5p, miR-3184-5p, miR-665-5p, miR-142-3p, miR-493-3p, miR-148a-5p, miR-34a-5p, miR-2366, miR-193b-5p, miR-378i, miR-378a-3p, miR-1247-5p, miR-30d-3p, miR-208b-3p, miR-210-5p, miR-422a, miR-92a-1-5p, miR-324-3p, miR-181b-1-3p, miR-377-5p, miR-142a-3p, miR-486-3p, miR-345-3p, miR-412-3p, miR-378f, miR-148a-3p, miR-3591-3p, miR-1306, miR-411b-3p, miR-181b-3p, miR-677, miR-6535, miR-669, miR-208a-3p, miR-28c, miR-4324, miR-425-5p, miR-2284w, miR-1843b-5p, miR-7b-5p, miR-542-3p, miR-223-3p, novel\_23, miR-197-3p, miR-22-3p, miR-134-3p, miR-149-5p, miR-339-5p, miR-7-5p, novel\_51, miR-194a, miR-105-5p, miR-2284l, miR-493-5p, miR-6240, miR-876-3p, miR-767, miR-1248, miR-301, miR-200a-5p, miR-874-3p, miR-125a, miR-1271, miR-542-5p, miR-2355-5p, miR-3432a, miR-494-5p, miR-2433, miR-125b-5p, miR-6740-5p, miR-1260b, miR-330-5p, miR-23b-5p, miR-1343-5p, miR-505-5p, miR-9-5p, miR-6517, miR-431, novel\_79, miR-152-3p, miR-125a-3p, miR-205-5p, miR-148b-5p, miR-2285b, novel\_39, miR-2284y, miR-3064-5p, novel\_94, miR-361-3p, miR-3082-5p, miR-7857-3p, miR-378e, miR-3064-5p, miR-7977, miR-4726-5p, miR-541-3p, miR-194b-5p, miR-101a-5p, miR-378c, miR-10b, miR-378b, miR-484, miR-296-5p, miR-30b-3p, miR-142-3p, miR-2285a, miR-9788-

miR-378d, miR-2330-5p, miR-424-5p, let-7a-5p, miR-491-5p, let-7e, miR-103a-2-5p, miR-199b-5p, novel\_115, miR-326, miR-16b, miR-199b-3p, miR-409b, miR-2300a-5p, miR-151a-3p, miR-27a-3p, miR-378c, miR-3120-5p, miR-378b, miR-296-5p, miR-484, miR-30b-3p, miR-877-3p, miR-423-5p, miR-3956-3p, novel\_60, miR-452-5p, miR-2285f, miR-4726-5p, miR-107-5p, miR-2285y, miR-378e, miR-27a-3p, let-7d-5p, miR-2319b, miR-211-5p, miR-7977, miR-504, miR-3963, miR-96-5p, miR-199b-5p, miR-361-3p, miR-378j, miR-377-5p, miR-143-3p, miR-486-3p, miR-345-3p, miR-760-3p, miR-98-5p, let-7k, miR-221-5p, miR-92a-1-5p, miR-345-3p, miR-185-3p, miR-216a-5p, miR-15a-5p, miR-383-5p, miR-328-3p, miR-1247-5p, miR-18a-3p, miR-196l, miR-378i, miR-378a-3p, miR-217-5p, miR-6525, miR-338-3p, miR-3184-5p, let-7b-5p, miR-4510, let-7b, miR-539-5p, miR-378c, miR-2330-3p, miR-665-5p, miR-1271, miR-130b-5p, miR-874-5p, miR-708-5p, miR-424-5p, miR-4492, let-7f, miR-320e, miR-151-3p, miR-6130, let-7i-5p, miR-15b-5p, miR-140-5p, miR-504-5p, miR-221-5p, miR-296-3p, miR-1827, miR-885-3p, miR-1895, miR-2285r, miR-296-3p, miR-130b-5p, miR-483-3p, miR-296-3p, miR-2411-3p, miR-185-5p, let-7g-5p, miR-149-5p, novel\_116, miR-31-5p, miR-377-5p, miR-30b-3p, miR-16b, miR-27b-3p, miR-497-5p, miR-1843b-5p, miR-1285, miR-873a-5p, miR-371b-3p, miR-24-3p, miR-211, miR-199b-5p, miR-2285m, miR-326-3p, miR-135a-2-3p, novel\_101, miR-128-1-5p, miR-199c, miR-656-5p, miR-15a, let-7i, miR-16a, novel\_69, miR-374c-3p, miR-6535, miR-216b-3p, miR-378b, miR-320b, miR-1291, miR-195a-5p, miR-6395, miR-378f, let-7e-5p, miR-9851-3p, miR-2285ab, miR-216a-3p, miR-18a-3p, miR-490-3p, miR-199a-5p, let-7g, miR-4286, miR-181a-2-3p, let-7f-5p, miR-543-5p, novel\_127, novel\_96, miR-6119-5p, miR-125a-3p, miR-217, let-7c-5p, miR-483-3p, miR-1271-5p, miR-322-5p, miR-

miR-1a-2-5p, miR-17-3p, novel\_127, miR-30b-3p, miR-34b-5p, miR-208b-3p, novel\_17, miR-125a-3p, miR-181b-1-3p, miR-130a-5p, miR-2285b, miR-2284a, miR-2284y, miR-2411, miR-885-3p, miR-2284u, miR-34a-5p, miR-361-5p, miR-1193, miR-330-5p, miR-124-3p, miR-15a-5p, miR-2411-5p, miR-302a-5p, miR-9-5p, miR-322-5p, miR-199a-3p, miR-222, miR-18a-3p, miR-30d-3p, miR-431, miR-1224-5p, miR-412, miR-17-3p, miR-424-5p, miR-2332, novel\_63, miR-1-5p, let-7b-3p, miR-2284k, miR-222-3p, miR-34c-3p, miR-135a-5p, miR-100-3p, miR-3074-5p, miR-2284v, miR-3074-2-3p, miR-665-5p, miR-16-5p, miR-3607-3p, miR-2318, miR-329b, novel\_99, miR-485-5p, miR-885-3p, miR-23a-5p, miR-411, miR-34c-5p, miR-15b-5p, miR-32-3p, miR-140-5p, miR-552-3p, miR-1271, miR-370-3p, miR-103a-2-5p, miR-431-5p, miR-326, miR-1306-5p, miR-199a-3p, miR-16b, miR-432-3p, miR-424-5p, miR-1388-3p, miR-124a, miR-2284b, miR-2426, miR-16b, miR-497-5p, miR-4791, miR-873a-5p, miR-145a-5p, miR-412-3p, miR-539-5p, miR-2284d, miR-3535, miR-221-3p, miR-187-3p, miR-145b, miR-181b-2-3p, miR-208a-3p, miR-2440, miR-15a, miR-107-5p, miR-16a, miR-34c, miR-323c, miR-2284w, miR-326-3p, miR-449a, miR-212-3p, miR-3956-3p, miR-1a-1-5p, miR-219b-3p, novel\_60, miR-32-3p, miR-17-3p, let-7i-3p, miR-9-5p, miR-2284j, miR-668-5p, miR-135b-5p, miR-544-5p, miR-2319a, miR-221, miR-381-3p, miR-129b-5p, miR-18a-3p, miR-1306, miR-34b, miR-181b-3p, miR-677, miR-3074-5p, miR-2319b, miR-2284g

COL12A1 ENSOARGO(collagen) miR-181a-2-3p, miR-665-5p, miR-2447, miR-342-3p, miR-2330-5p, miR-1343-3p, miR-204-3p, miR-134-5p, miR-95-3p, miR-197-3p, miR-342, miR-134, miR-6529b, miR-134-5p, miR-7862

MED27 ENSOARGO(mediator) miR-361-3p, miR-365a-3p, miR-224-5p, miR-99a-

HMGCLL1 ENSOARGO(3-hydrox) miR-361-3p, miR-99a-5p, novel\_87, miR-100-5p, miR-224-5p, miR-361-3p, miR-3578, miR-99a, miR-99a-5p, miR-99b-5p, miR-450b-5p

PLXNA4 ENSOARGO(plexin A)

miR-505-5p, miR-214-5p, miR-6517, miR-299a-3p, miR-1224-5p, let-7d, miR-148b-5p, miR-490-3p, miR-1957a, let-7g, miR-4286, miR-3064-5p, let-7f-5p, miR-2898, novel\_96, miR-125a-3p, miR-2285af, let-7c-5p, miR-34c-5p, miR-154b-5p, miR-542-5p, miR-2355-5p, miR-370-3p, miR-485-5p, miR-3154, miR-103b, miR-1306-3p, miR-134-3p, let-7g-5p, miR-185-5p, miR-2285g, miR-194-3p, miR-26a-2-3p, miR-1843b-5p, miR-194-5p, miR-432-3p, miR-654-3p, miR-432-3p, miR-2285r, miR-130b-5p, miR-628-5p, miR-363-5p, miR-194a, novel\_51, novel\_69, miR-299b-3p, miR-34b, miR-2404, miR-6535, miR-1291, let-7e-5p, miR-2387, miR-2285ab, miR-1306, miR-3959-3p, miR-2285m, miR-449a, miR-542-5p, miR-208a-3p, let-7i, miR-34c, miR-151-5p, miR-212-5p, miR-3600, miR-142-3p, miR-34a-5p, miR-133a-3p, miR-2300b-3p, miR-1961, miR-140-3p, miR-1197-5p, miR-188-3p, miR-2904, miR-183-5p, miR-98-5p, let-7k, miR-299-3p, miR-34b-5p, miR-542-5p, miR-208b-3p, miR-6130, let-7i-5p, miR-151b, novel\_32, miR-204-3p, miR-504-5p, miR-140-5p, miR-2331-3p, miR-1827, miR-2285c, miR-6134, let-7b-5p, miR-3184-5p, miR-4510, let-7b, novel\_74, miR-130b-5p, miR-874-5p, let-7f, miR-664a-5p, miR-151-3p, miR-324-3p, miR-147a, miR-496-5p, miR-153, miR-2285e, miR-455-3p, miR-9788-3p, miR-216a-3p, miR-151a-3p, miR-1839-5p, miR-301b-5p, miR-296-5p, miR-8485, let-7a-5p, miR-574-3p, novel\_124, miR-491-5p, miR-3085-3p, let-7e, miR-542-5p, miR-153-3p, miR-1306-5p, miR-2957, miR-489, miR-25, miR-378g, let-7d-5p, miR-3064-5p, miR-504, miR-299b-5p, novel\_94, miR-1306-3p, miR-877-3p, miR-154a, miR-423-5p, miR-212-3p, miR-2447, miR-3059-5p, miR-4454, miR-194b-5p, miR-4726-5p, miR-218-5p, miR-301a-5p

miR-3074-1-3p, miR-190a-3p, miR-2318, miR-18a, miR-320a, miR-331-5p, miR-381-3p, miR-365a-5p, miR-6128, miR-16-5p, miR-331-5p, miR-144, miR-135a-1-3p, miR-2332, novel\_63, miR-410-5p, novel\_121, miR-486-5p, miR-450a-1-3p, miR-545-5p, miR-6516-5p, miR-322-5p, miR-18b-5p, miR-429-3p, miR-200b-3p, miR-300, miR-582-3p, miR-1290, miR-345-3p, miR-196a-5p, miR-3591-5p, miR-450b-5p, miR-148b-5p, miR-24-2-5p, miR-29b-2-5p, miR-107, miR-200c-3p, miR-127-5p, miR-200c, miR-677, miR-144-3p, miR-320c, miR-411b-3p, miR-7-1-3p, miR-3120-3p, miR-195a-5p, miR-505-3p, miR-19a-3p, miR-107, miR-3065-5p, miR-18b, miR-2285ab, miR-2428, miR-323c, miR-495-3p, novel\_1, miR-6119-3p, novel\_87, miR-33a-3p, miR-16a, miR-142b, miR-15a, miR-103, miR-3431, miR-134-3p, miR-2284d, miR-3535, miR-665, miR-103a-3p, miR-2284x, miR-497-5p, miR-16b, miR-194-5p, miR-145a-5p, miR-542-3p, miR-1434-3p, miR-708-3p, miR-2284l, miR-2285r, miR-6240, miR-493-5p, miR-196b-5p, miR-2411-3p, miR-194a, miR-330-3p, miR-190a, miR-365b-5p, miR-15b-5p, novel\_25, miR-6130, miR-6516, miR-582-5p, miR-532-5p, miR-182-5p, miR-216b-3p, miR-32-3p, miR-18a-5p, miR-2312, let-7g-3p, miR-21a-3p, miR-6525, miR-4510, miR-190a-5p, miR-424-5p, miR-664a, miR-29b-2-5p, miR-2285j, miR-2284h-5p, novel\_83, miR-15a-5p, miR-340-5p, miR-200b, miR-505-3p, miR-212-5p, miR-3600, miR-19b-3p, miR-4429, miR-1434-5p, miR-2904, miR-1246, miR-2424, miR-130a-5p, miR-345-3p, miR-2285w, miR-21-3p, miR-2284m, miR-320d, miR-345-3p, miR-500a-5p, miR-216a-5p, miR-196a-3p, miR-2483-3p, miR-378g, miR-24-1-5p, miR-9-3p, miR-493-5p, miR-335-3p, miR-129b-5p, miR-194b-5p, miR-190b-5p, miR-2285f, miR-32-3p, miR-3964, miR-628-3p, miR-107-5p, miR-126a-5p, miR-539-5p, miR-153, miR-222-5p, miR-145b, miR-181b-2-3p, miR-330-3p, miR-3120-5p, miR-

ARHGAP5

ENSOARGO(Rho

GTPa



miR-2319b, miR-139-5p, miR-126b-5p, miR-378g, miR-144-5p, miR-652-3p, miR-504, miR-3963, miR-96-5p, miR-2447, miR-423-5p, miR-154-3p, miR-330-3p, miR-1343-3p, miR-181b-2-3p, miR-153, miR-126a-5p, miR-455-3p, miR-8485, miR-182-5p, miR-29b-1-5p, miR-130b-3p, miR-491-5p, miR-103a-2-5p, miR-146b, miR-153-3p, miR-504-5p, miR-30c-1-3p, miR-10a, miR-299, miR-30d-5p, miR-345-5p, miR-1827, miR-3184-3p, miR-224-5p, miR-769-5p, miR-3184-5p, miR-30e-3p, miR-30a-3p, miR-151-3p, novel\_74, miR-4492, miR-454-3p, miR-874-5p, miR-129-5p, miR-30d-3p, miR-380-5p, miR-7859, miR-1247-5p, miR-2366, miR-30c-5p, miR-16-1-3p, miR-487a, miR-195a-3p, miR-181b-1-3p, miR-2285i, miR-421-5p, miR-500a-5p, novel\_68, miR-3120-3p, miR-299b-3p, miR-374c-3p, miR-411b-3p, miR-181b-3p, miR-677, miR-669, miR-320c, miR-3591-3p, miR-1306, miR-150-5p, miR-146b-5p, miR-2319a, miR-335-5p, miR-29c-3p, miR-758-5p, miR-193b-3p, miR-142b, miR-29a, miR-31-5p, miR-134-3p, miR-194-3p, novel\_116, miR-149-5p, miR-223-3p, miR-7b-5p, miR-432, miR-16-1-3p, miR-6240, miR-628-5p, miR-668-3p, miR-432-3p, miR-432-3p, miR-146a, miR-7-5p, miR-105-5p, miR-196b-5p, miR-193a-3p, miR-3956, miR-542-5p, miR-30e-5p, miR-345-5p, miR-329b, miR-144-5p, miR-1260b, miR-1197-3p, miR-6740-5p, miR-429-3p, miR-299a-3p, miR-758-5p, miR-505-5p, miR-2284z, miR-3591-5p, miR-196a-5p, miR-330-5p, miR-1343-5p, miR-3064-5p, miR-148b-5p, miR-2285b, miR-200a, novel\_39, miR-664-3p, miR-127-5p, miR-200a-3p, novel\_96, miR-10b, miR-664b, miR-3064-5p, miR-452-5p, miR-2285f, miR-107-5p, miR-769-5p, miR-335, miR-4726-5p, miR-151a-3p, miR-105-1, miR-9788-3p, miR-10b, miR-6529a, miR-484, miR-30b-3p, miR-2284aa, miR-16-2-3p, miR-652-5p, miR-30c-1-3p, miR-3187-3p, novel\_103, miR-1306-5p, miR-326, miR-320b, miR-2957, miR-3085-3p, novel\_124, miR-140-5p, miR-221-5p, miR-182-5p, miR-532-

miR-211-5p, miR-499b-5p, miR-3064-5p, miR-4792, miR-500-3p, miR-203-3p, miR-2483-3p, miR-3082-5p, miR-7857-3p, miR-499a-3p, miR-199b-5p, miR-877-3p, miR-668-5p, miR-136-5p, miR-1296-5p, miR-3059-5p, miR-502-3p, miR-1285-5p, miR-361-3p, miR-301a-5p, miR-2285y, miR-2440, miR-3958-3p, miR-181b-2-3p, miR-2300a-5p, miR-1343-3p, miR-330-3p, miR-151a-3p, miR-421, miR-216a-3p, miR-142-5p, miR-501-3p, miR-301b-5p, miR-6529a, miR-21b, miR-1839-5p, miR-101c, miR-1388-3p, miR-124a, miR-2310, miR-431-5p, miR-320b, miR-199b-5p, miR-3085-3p, miR-552-3p, miR-32-3p, miR-140-5p, miR-221-5p, miR-151b, miR-155-5p, miR-216b-5p, miR-193b-3p, miR-377-3p, miR-499b-3p, miR-433-3p, miR-27b-5p, miR-129b-3p, novel\_99, miR-145a-3p, miR-6134, miR-224-5p, miR-142a-5p, miR-6525, miR-665, miR-320e, miR-151-3p, miR-2285j, miR-130b-5p, miR-208b-5p, miR-874-5p, miR-155-5p, novel\_74, miR-548e-3p, miR-328-3p, novel\_83, miR-151-5p, miR-7859, miR-383-5p, miR-217-5p, miR-1197-5p, miR-140-3p, miR-1193, miR-5703, miR-124-3p, novel\_133, miR-378d, miR-4429, miR-2424, miR-2411, miR-181b-1-3p, miR-125b-2-3p, miR-664b-3p, miR-92a-1-5p, miR-185-3p, miR-299-3p, miR-221-5p, miR-320d, miR-3120-3p, miR-655-5p, miR-320b, miR-181b-3p, miR-677, miR-320c, miR-299b-3p, miR-374c-3p, miR-378b, miR-216a-3p, miR-150-5p, miR-6395, miR-9851-3p, miR-1291, miR-495-3p, miR-193b-3p, miR-1a-1-5p, miR-199b-5p, miR-211, miR-576-3p, miR-147-5p, miR-22-5p, miR-26b-3p, miR-487b-3p, miR-665, miR-31-5p, miR-340-3p, miR-411-5p, miR-149-5p, miR-194-3p, miR-432-5p, miR-374b-3p, miR-3071-5p, miR-197-3p, miR-1843b-5p, miR-1285, miR-7b-5p, miR-1434-3p, miR-873a-5p, miR-432, miR-188-5p, miR-744-5p, miR-363-5p, miR-6240, miR-130b-5p, let-7j, miR-432-3p, miR-2285r, miR-330-3p, miR-377-3p, miR-7-5p, miR-224-5p, miR-193a-3p, miR-615-5p, miR-2255-5p, miR-3068-3p, miR-199a-5p, miR-320a, miR-200c, miR-5126, miR-431-5p, miR-326, miR-330-3p, novel\_51, miR-185-3p, miR-491-5p, miR-200c-3p, miR-214-3p, novel\_96, novel\_127, miR-216c-5p, miR-6240, miR-29b-2-5p, miR-4532, miR-486-3p, novel\_133, miR-542-3p, miR-330-5p, miR-30b-3p, miR-188-3p, miR-30b-3p, miR-200b-3p, miR-18a-3p, miR-2300a-5p, miR-429-3p, miR-330-3p, miR-431, miR-3431, miR-532-3p, miR-455-3p, miR-1306-3p, miR-331-3p, miR-665, miR-29b-2-5p, miR-874-5p, miR-486b-3p, miR-2447, miR-214, miR-103b, miR-361-3p, miR-2903, miR-371b-3p, miR-326-3p, miR-3184-5p, miR-423-5p, miR-122-5p, miR-18a-3p, miR-1306-3p, miR-876-3p, miR-23a-5p, miR-9851-3p, miR-1895, miR-671-5p, miR-574-5p, miR-140-5p, miR-615-5p, miR-670-3p, miR-669, miR-204-3p, miR-143-5p, miR-148a-3p, miR-100-3p, miR-148b-3p, miR-378a-5p, miR-152-3p, miR-208b-5p

IL19 ENSOARGO(interleukin 19) 3431, miR-532-3p, miR-455-3p, miR-1306-3p, miR-331-3p, miR-665, miR-29b-2-5p, miR-874-5p, miR-486b-3p, miR-2447, miR-214, miR-103b, miR-361-3p, miR-2903, miR-371b-3p, miR-326-3p, miR-3184-5p, miR-423-5p, miR-122-5p, miR-18a-3p, miR-1306-3p, miR-876-3p, miR-23a-5p, miR-9851-3p, miR-1895, miR-671-5p, miR-574-5p, miR-140-5p, miR-615-5p, miR-670-3p, miR-669, miR-204-3p

CDHR5 ENSOARGO(cadherin 5) 3431, miR-532-3p, miR-455-3p, miR-1306-3p, miR-331-3p, miR-665, miR-29b-2-5p, miR-874-5p, miR-486b-3p, miR-2447, miR-214, miR-103b, miR-361-3p, miR-2903, miR-371b-3p, miR-326-3p, miR-3184-5p, miR-423-5p, miR-122-5p, miR-18a-3p, miR-1306-3p, miR-876-3p, miR-23a-5p, miR-9851-3p, miR-1895, miR-671-5p, miR-574-5p, miR-140-5p, miR-615-5p, miR-670-3p, miR-669, miR-204-3p

DPP4 ENSOARGO(dipeptidyl peptidase 4) 3431, miR-532-3p, miR-455-3p, miR-1306-3p, miR-331-3p, miR-665, miR-29b-2-5p, miR-874-5p, miR-486b-3p, miR-2447, miR-214, miR-103b, miR-361-3p, miR-2903, miR-371b-3p, miR-326-3p, miR-3184-5p, miR-423-5p, miR-122-5p, miR-18a-3p, miR-1306-3p, miR-876-3p, miR-23a-5p, miR-9851-3p, miR-1895, miR-671-5p, miR-574-5p, miR-140-5p, miR-615-5p, miR-670-3p, miR-669, miR-204-3p

miR-10b-3p, miR-329b, miR-3074-1-3p, miR-48b-5p, miR-488-3p, miR-301, miR-3154, miR-320a, miR-3965, miR-769, miR-370-3p, miR-134-5p, miR-486b-3p, miR-204-5p, miR-2433, miR-135a-1-3p, miR-331-3p, miR-365a-5p, miR-3607-3p, miR-134, miR-1343-5p, miR-330-5p, miR-9-5p, miR-505-5p, miR-24-2-5p, miR-134-5p, miR-214-5p, miR-450a-2-3p, miR-127-5p, novel\_127, miR-30f, miR-2385-3p, miR-19a-3p, miR-146b-5p, miR-2387, miR-3141, miR-150-5p, miR-18a-3p, novel\_69, miR-670-3p, miR-320c, miR-669, miR-3120-3p, miR-128-1-5p, miR-203b-5p, miR-502-5p, miR-576-3p, miR-211, miR-24-3p, miR-326-3p, miR-2428, miR-135a-2-3p, miR-3432b, miR-219a-1-3p, miR-4508, miR-188-5p, miR-744-5p, miR-432, miR-708-3p, miR-1285, miR-223-3p, miR-542-3p, miR-22-3p, miR-145a-5p, miR-432-5p, miR-3535, miR-134-3p, miR-31-5p, miR-1343-5p, miR-146a, miR-365b-5p, miR-190a, miR-3141, novel\_51, miR-432-3p, let-7f-2-3p, let-7f-2-3p, miR-21a-3p, let-7f-1-3p, miR-433-3p, miR-139-5p, miR-22-3p, miR-204-3p, miR-504-5p, miR-182-5p, miR-4492, miR-874-5p, miR-190a-5p, miR-15b-3p, let-7b-3p, miR-19b-1-5p, miR-3604, miR-665, miR-769-5p, miR-98-3p, miR-346, miR-3184-5p, miR-6134, miR-433-5p, miR-19b-3p, miR-184-3p, miR-4429, let-7a-3p, miR-2366, miR-193b-5p, miR-2300b-3p, miR-98-3p, miR-2904, miR-5703, miR-18a-3p, miR-320d, miR-618, miR-2285p, miR-185-3p, miR-92a-1-5p, miR-376a-5p, miR-2432, miR-486-3p, miR-146a-5p, miR-216c-5p, miR-504, miR-335-3p, miR-9-3p, miR-381-3p, miR-378g, miR-2483-3p, miR-1185-2-3p, miR-4792, miR-139-5p, miR-7977, miR-211-5p, miR-4726-5p, miR-3968, miR-2285t, miR-101-3p, miR-769-5p, miR-1285-5p, miR-9-3p, miR-423-5p, miR-2447, miR-541-3p, miR-9-5p, miR-190b-5p, miR-101c, miR-296-5p, miR-541, miR-4791, miR-455-3p, miR-1185-3p, miR-145b, miR-1185-5p, miR-146b, miR-320b, miR-326, miR-182-5p, miR-2330-5p  
 miR-345-3p, miR-217, miR-2411-3p, miR-105-5p, miR-219b-5p, miR-374a-5p, miR-26a-5p, miR-466f-3p, novel\_96, miR-199b-5p, miR-181b-5p, miR-202-5p, miR-491-5p, miR-181a-2-3p, miR-382-3p, miR-380-3p, miR-2432, miR-199a-5p, miR-130a-5p, miR-145a-5p, miR-217-5p, miR-3578, miR-181a-5p, miR-345-3p, miR-708-3p, miR-1839-5p, miR-2426, miR-380-3p, miR-145b, miR-151a-3p, miR-105-1, miR-548e-3p, miR-3604, miR-151-3p, miR-181d-5p, miR-665-5p, miR-193a-5p, miR-32-3p, miR-374b, miR-135a-2-3p, miR-181c-5p, miR-199b-5p, miR-423-5p, miR-3184-5p, miR-129b-5p, miR-150-5p, miR-199b-5p, novel\_94, miR-668-5p, miR-21-3p, miR-374b-5p, miR-32-3p, miR-20a-3p, miR-548o-3p, miR-133c, miR-199a-5p, miR-146b-3p, miR-3596, miR-27a-5p

CPNE9

ENSOARGO(copine f

DSG3

ENSOARGO(desmogle

miR-4510, miR-539-5p, miR-664a-5p, miR-29b-2-5p, miR-222-3p, miR-487a-5p, novel\_74, miR-216b-3p, miR-323-5p, miR-6130, miR-6516, miR-433-3p, miR-411, miR-30d-5p, miR-30f, miR-195a-3p, miR-380-3p, miR-125b-2-3p, miR-377-5p, miR-130a-5p, miR-210-5p, miR-30b, miR-30d, miR-760-3p, miR-1b-3p, miR-18a-3p, miR-200b, miR-340-5p, miR-23b-3p, miR-383-5p, miR-5703, miR-140-3p, miR-2904, miR-124-3p, miR-30c-5p, miR-361-5p, miR-194b-5p, miR-6527, miR-212-3p, miR-101-3p, miR-30b-5p, miR-374a-3p, miR-628-3p, miR-211-5p, miR-499b-5p, miR-20a-3p, miR-2319b, miR-664b, miR-27a-3p, miR-203-3p, miR-489, miR-3082-5p, miR-381-3p, miR-378j, miR-129b-5p, miR-221, miR-376b, miR-23a-3p, miR-2330-5p, miR-382-3p, miR-124a, miR-2310, miR-505, miR-3955-3p, miR-27a-3p, miR-5010-3p, miR-1343-3p, miR-409b, miR-221-3p, miR-3962, miR-450b-5p, miR-2426, miR-374a-3p, miR-135a-5p, miR-6740-5p, miR-374b-3p, miR-204-5p, miR-3956, miR-1271, miR-141-3p, miR-370-3p, miR-874-3p, miR-3965, miR-23b, miR-30e-5p, miR-381-3p, miR-1814c, miR-485-5p, novel\_48, miR-181a-2-3p, miR-29b-2-5p, miR-3956-5p, miR-29a-5p, miR-450b-5p, miR-2478, miR-200c, miR-664-3p, miR-205-5p, novel\_127, miR-200a-3p, miR-200c-3p, miR-429-3p, miR-222, novel\_121, miR-6516-5p, miR-30a-5p, miR-1290, miR-200b-3p, miR-30c, miR-300, miR-2284w, miR-211, novel\_1, miR-378b, miR-329-5p, novel\_68, miR-323a-5p, miR-3065-5p, miR-18a-3p, miR-135b-5p, miR-7975, miR-2319a, miR-6240, miR-432-3p, miR-194a, miR-330-3p, miR-452-5p, miR-377-5p, miR-185-5p, miR-194-5p, miR-3071-5p, miR-873a-5p, miR-708-3p, miR-27b-3p, miR-380-3p

PRKACA ENSOARGOC cAMP-dep

miR-300-3p, miR-769, miR-874-3p, miR-615-5p, miR-125a, miR-10a-3p, miR-485-5p, miR-3154, miR-1260b, miR-378c, miR-138-5p, miR-486b-3p, miR-2433, miR-331-3p, miR-125b-5p, miR-6740-5p, miR-3969, miR-378h, miR-483-3p, miR-214-5p, miR-299a-3p, miR-2285ad, novel\_79, miR-10a-5p, miR-1343-5p, miR-330-5p, miR-200a, miR-1271-3p, miR-495-5p, miR-3064-5p, miR-181a-2-3p, miR-450a-2-3p, miR-2898, novel\_127, novel\_96, miR-2285af, miR-1260a, miR-664-3p, miR-30c-2-3p, miR-339a, novel\_69, miR-299b-3p, miR-6535, miR-669, miR-378b, miR-3074-5p, miR-320b, miR-10a-5p, miR-3120-3p, miR-378f, miR-2387, miR-3141, miR-18a-3p, miR-326-3p, miR-2428, miR-4324, miR-339-5p, miR-138, miR-30b-3p, miR-1260b, miR-125b-1-3p, miR-4508, miR-873a-5p, miR-19b-2-5p, miR-130b-5p, miR-363-5p, miR-483-3p, miR-125a-5p, miR-1343-5p, miR-582, miR-2285v, miR-3141, miR-10a, miR-2284s, miR-216b-5p, miR-6130, miR-504-5p, miR-378a-3p, miR-221-5p, miR-30c-1-3p, miR-339b, miR-625-5p, miR-1827, miR-21a-3p, miR-10b-5p, miR-769-5p, miR-346, miR-3184-5p, miR-539-5p, miR-378c, miR-4510, miR-3074-5p, miR-664a, miR-4492, miR-130b-5p, miR-19b-1-5p, miR-532-3p, miR-18a-3p, miR-378d, miR-378i, miR-5703, miR-378a-3p, miR-1197-5p, miR-486-3p, miR-2432, miR-10a-3p, miR-345-3p, miR-30b-3p, miR-221-5p, miR-299-3p, miR-422a, miR-125b, miR-185-3p, miR-378e, miR-3082-5p, miR-664b, miR-3064-5p, miR-499b-5p, miR-2285u, miR-504, miR-335-3p, miR-361-3p, miR-423-5p, miR-2285n, miR-769-5p, miR-1343-3p, miR-378c, miR-2426, miR-378b, miR-2284r, miR-10b, miR-30b-3p, miR-30c-1-3p, miR-378d, miR-4532, miR-382-3p, miR-491-5p, miR-3085-3p, miR-25-5p, miR-326

miR-2426, miR-544a, miR-1388-5p, miR-362-3p, miR-125b-2-3p, miR-30b-3p, miR-412-3p, miR-329-3p, miR-484, miR-9788-3p, miR-425-3p, miR-181b-2-3p, miR-222-5p, novel\_4, miR-151a-3p, miR-214-3p, miR-103a-2-5p, miR-199b-5p, miR-106b-5p, miR-362-3p, novel\_19, novel\_103, miR-1306-5p, miR-320b, miR-1839-3p, miR-106a-5p, miR-504, miR-181a-3p, miR-199b-5p, miR-361-3p, miR-4443, miR-3082-5p, miR-499a-3p, miR-3596, miR-211-5p, miR-2285u, miR-664b, miR-2285t, miR-335, miR-3958-3p, miR-628-3p, miR-4726-5p, miR-107-5p, miR-769-5p, miR-371a-5p, novel\_82, miR-219a-2-3p, miR-452-5p, miR-378d, miR-664-5p, miR-142-3p, miR-4429, miR-140-3p, miR-188-3p, miR-1193, miR-362-3p, miR-193b-5p, miR-376a-5p, miR-191, miR-616-3p, miR-1247-5p, miR-222-5p, miR-487a-3p, miR-485-3p, miR-106a, miR-18a-3p, miR-221-5p, miR-760-3p, miR-320d, miR-106a, miR-92a-1-5p, miR-324-3p, novel\_17, miR-196a-3p, miR-143-3p, miR-380-3p, miR-486-3p, miR-2432, miR-2424, miR-376a-5p, miR-20a, miR-329a-5p, miR-216c-5p, miR-27b-5p, miR-22-3p, miR-323-5p, miR-216b-5p, miR-499b-3p, miR-544-3p, miR-582-5p, miR-296-3p, miR-552-3p, miR-370-5p, miR-221-5p, miR-504-5p, miR-2331-3p, miR-4492, miR-874-5p, miR-129-5p, miR-17-3p, miR-6516-3p, miR-665, miR-320e, miR-219b-3p, miR-19b-1-5p, miR-151-3p, miR-30a-3p, miR-30e-3p, miR-338-3p, miR-769-5p, miR-214, miR-665-5p, miR-425-5p, miR-744-5p, miR-2889, miR-455-5p, miR-26a-2-3p, miR-30b-3p, miR-380-3p, miR-197-3p, miR-22-3p, miR-1285, miR-1843b-5p, miR-7b-5p, miR-19b-2-5p, miR-708-3p, miR-20b, miR-544b, miR-2355-3p, novel\_116, miR-194-3p, miR-149-5p, miR-185-5p, miR-665, miR-31-5p, miR-106a-5p, miR-455-5p, miR-17-5p, miR-197-5p, miR-7-5p, miR-539-3p, miR-654-3p, miR-628-5p, miR-382, miR-379-5p, miR-216a-3p, miR-18a-3p, miR-1306, miR-150-5p, miR-2387, miR-677, miR-320c, miR-323a-5p, miR-146b-3p, miR-655-5p, miR-329a-

miR-23a-5p, miR-381-3p, miR-320a, miR-154b-5p, miR-141-3p, miR-138-5p, miR-1-5p, miR-323-3p, miR-378c, miR-1306-5p, miR-3607-3p, let-7d, miR-582-3p, miR-300, miR-105-2, miR-128-3p, miR-345-3p, miR-3578, miR-501-3p, miR-24-2-5p, miR-302a-5p, miR-483-3p, miR-1271-5p, miR-378h, miR-214-5p, miR-450a-2-3p, miR-181b-5p, miR-92a-3p, miR-6119-5p, let-7c-5p, miR-2478, miR-24-2-5p, miR-1271-3p, miR-490-3p, miR-181a-2-3p, miR-4286, miR-1291, miR-195a-5p, miR-505-3p, miR-135b-5p, miR-6516-3p, miR-2387, miR-18a-3p, miR-378b, miR-320b, miR-92a-3p, novel\_1, miR-147-5p, miR-502b, miR-199c, miR-15a, miR-16a, let-7i, miR-24-3p, miR-326-3p, miR-2428, miR-495-3p, miR-138, miR-653, miR-181a-5p, miR-145a-5p, miR-2285g, miR-503-5p, miR-185-5p, let-7g-5p, miR-122-3p, miR-665, miR-377-5p, miR-503-5p, miR-539-3p, miR-345-5p, miR-130b-5p, let-7g-3p, miR-21a-3p, miR-27b-5p, miR-193b-3p, miR-204-3p, novel\_32, miR-545-3p, miR-378a-3p, miR-532-5p, miR-182-5p, miR-664a, miR-208b-5p, miR-424-5p, miR-324-3p, miR-320e, let-7b-5p, miR-338-3p, miR-378c, miR-145a-3p, miR-1271, miR-4429, miR-941, miR-378d, novel\_133, miR-362-3p, miR-2408, miR-188-3p, miR-5703, miR-140-3p, miR-1193, miR-487a-3p, miR-15a-5p, miR-148b-3p, miR-151-5p, novel\_83, miR-532-3p, miR-3960, miR-3600, miR-485-3p, miR-505-3p, miR-320d, miR-760-3p, miR-466i-5p, miR-21-3p, miR-185-3p, miR-125b-2-3p, novel\_94, miR-378e, let-7d-5p, miR-664b, miR-3064-5p, miR-10b, miR-20a-3p, miR-7977, miR-4726-5p, miR-2285n, miR-1973, miR-2285y, miR-107-5p, miR-502-3p, novel\_60, miR-212-3p, miR-541-3p, miR-2285f, miR-181d-5p, miR-378c, miR-450b-5p, miR-6529a, miR-378b, miR-9788-3p, miR-216a-3p, miR-2285e, miR-105-1, miR-151a-3p, miR-2300a-5p, miR-409b, miR-5010-3p, miR-222-5p, miR-3085-3p, novel\_124, miR-1468, let-7a miR-320b, novel\_115, miR-326, miR-362-3p, let-7a-5p, miR-193a-3p, miR-378d, miR-545-5p, miR-193b-3p, miR-193b-3p

KIAA1958 ENSOARGO(KIAA1958

TMEM30A ENSOARGO(transmem

miR-374c-3p, miR-677, miR-669, miR-181b-3p, novel\_68, miR-329-5p, miR-3120-3p, miR-3141, miR-3591-3p, miR-758-5p, miR-6123, miR-4324, miR-1307-5p, miR-134-3p, miR-194-3p, miR-149-5p, miR-3955-5p, miR-31-5p, miR-339-5p, miR-16b, miR-16-1-3p, miR-497-5p, miR-27b-3p, miR-197-3p, miR-22-3p, miR-432-3p, miR-628-5p, miR-365b-5p, miR-3141, miR-105-5p, novel\_51, miR-194a, miR-874-3p, miR-2285aa, miR-2355-5p, miR-125a, miR-2474, miR-23b, novel\_42, miR-16-5p, miR-592, miR-2433, miR-125b-5p, miR-100-3p, miR-6740-5p, miR-322-5p, miR-505-5p, miR-129-1-3p, miR-2285ad, novel\_79, miR-18b-5p, miR-1343-5p, miR-330-5p, miR-29a-5p, miR-3956-5p, miR-2285b, miR-192-3p, miR-3064-5p, novel\_96, novel\_127, miR-664-3p, miR-125a-3p, miR-378g, miR-499a-3p, miR-500-3p, miR-4443, miR-211-5p, miR-504, miR-668-5p, miR-544-5p, miR-140-5p, miR-361-3p, miR-7705, miR-2447, miR-3956-3p, miR-190b-5p, miR-3968, miR-218-5p, miR-2440, miR-425-3p, miR-1298-3p, miR-147a, miR-421, miR-199b-3p, novel\_78, miR-181b-2-3p, miR-2284r, miR-501-3p, miR-8485, miR-2310, miR-1388-3p, miR-23a-3p, miR-491-5p, miR-103a-2-5p, miR-214-3p, miR-29b-1-5p, miR-16b, miR-2284s, miR-499b-3p, miR-216b-5p, miR-15b-5p, miR-151b, miR-504-5p, miR-216b-3p, novel\_107, miR-552-3p, miR-339b, miR-1895, miR-625-5p, miR-1827, miR-129b-3p, miR-500a-3p, miR-433-3p, miR-6525, miR-769-5p, miR-129-2-3p, miR-665-5p, miR-214, miR-500, miR-4492, miR-190a-5p, miR-874-5p, miR-130b-5p, miR-665, miR-664a-5p, miR-7859, miR-23b-3p, miR-23c, miR-2284h-5p, miR-18a-3p, miR-380-5p, miR-493-3p, miR-184-3p, miR-33b-3p, miR-16-1-3p, miR-34a-5p, miR-2366, miR-2285i, miR-181b-1-3p, miR-486-3p, miR-143-3p, miR-329a-5p, miR-2285w, miR-503-5p, miR-345-3p, novel\_17, miR-323a-5p, miR-146b-3p, miR-34b, miR-320b, miR-1291, miR-2285k, miR-9851-3p, miR-195a-5p, miR-2287, miR-18b, miR-18a-



novel\_79, miR-1224-5p, miR-483-3p, miR-9-5p, miR-330-5p, miR-218-2-3p, miR-345-3p, miR-10a-5p, miR-4286, miR-181a-2-3p, miR-2285b, novel\_39, miR-199a-5p, miR-2478, miR-28b, miR-339a, miR-125a-3p, miR-152-3p, miR-127-5p, miR-2355-5p, miR-370-3p, miR-874-3p, miR-487a-3p, miR-324-5p, miR-199a-5p, miR-133c, miR-223-5p, miR-374c-3p, miR-23b, miR-3154, miR-6128, miR-365a-5p, miR-6740-5p, miR-34c-3p, miR-486b-3p, miR-28-5p, miR-339-5p, novel\_116, miR-197-3p, miR-708-3p, miR-27b-3p, miR-188-5p, miR-455-5p, miR-219a-1-3p, miR-30b-3p, miR-493-5p, miR-130b-5p, miR-296-3p, miR-432-3p, miR-432-3p, miR-455-5p, miR-2411-3p, miR-365b-5p, miR-296-3p, miR-224-5p, miR-452-5p, miR-124-5p, miR-483-3p, miR-10a-5p, miR-3120-3p, miR-320b, miR-329-5p, miR-150-5p, miR-148a-3p, miR-6516-3p, miR-17975, miR-2319a, miR-3957-3p, miR-2428, miR-199b-5p, miR-326-3p, miR-28c, miR-203b-5p, miR-128-1-5p, miR-148b-3p, miR-23c, miR-23b-3p, miR-95-3p, miR-5703, miR-140-3p, miR-188-3p, novel\_133, miR-148a-5p, miR-142-3p, miR-487a, miR-216c-5p, miR-329a-5p, miR-486-3p, miR-345-3p, miR-185-3p, miR-210-5p, miR-196a-3p, miR-182-5p, miR-154a-3p, miR-216b-3p, miR-32-3p, miR-2331-3p, miR-10a, miR-299, miR-186-5p, miR-154b-3p, miR-339b, miR-425-5p, miR-145a-3p, miR-224-5p, miR-10b-5p, miR-130b-5p, miR-708-5p, miR-27a-3p, miR-548w, novel\_78, miR-9788-3p, miR-30b-3p, miR-10b, miR-2426, miR-23a-3p, miR-182-5p, novel\_115, novel\_103, miR-326, miR-199b-5p, miR-7689-3p, miR-2319b, miR-27a-3p, miR-454-5p, miR-25, miR-199b-5p, miR-493-5p, miR-9-5p, miR-452-5p, miR-32-3p, novel\_82, miR-154-3p

miR-424-5p, miR-652-5p, miR-30c-1-3p, miR-4532, miR-320b, miR-1306-5p, miR-5126, miR-3085-3p, novel\_124, miR-3955-3p, novel\_4, miR-2300a-5p, miR-5010-3p, miR-2285e, miR-296-5p, miR-484, miR-10b, miR-30b-3p, miR-450b-5p, novel\_60, miR-541-3p, miR-212-3p, miR-2285f, miR-769-5p, miR-107-5p, miR-4726-5p, miR-3064-5p, miR-499b-5p, miR-7977, miR-3082-5p, miR-361-3p, miR-877-3p, miR-130a-5p, miR-196a-3p, miR-185-3p, miR-320d, miR-760-3p, miR-466i-5p, miR-221-5p, miR-34b-5p, miR-30b-3p, miR-299-3p, miR-21-3p, miR-15a-5p, miR-532-3p, novel\_133, miR-2408, miR-2300b-3p, miR-1197-5p, miR-1193, miR-140-3p, miR-5703, miR-4429, miR-378d, miR-425-5p, miR-10b-5p, miR-6134, miR-324-3p, miR-338-5p, miR-320e, miR-17-3p, miR-664a, miR-424-5p, miR-221-5p, miR-370-5p, miR-3065-3p, miR-182-5p, miR-132-5p, miR-193b-3p, miR-139-5p, miR-22-3p, novel\_32, miR-21a-3p, miR-2312, miR-130b-5p, miR-363-5p, miR-654-3p, miR-197-5p, miR-1343-5p, miR-130a-3p, miR-26b-3p, miR-377-5p, miR-2285g, miR-1285, miR-138, miR-30b-3p, miR-1260b, miR-744-5p, miR-7862, miR-2889, miR-1193, miR-17-3p, miR-211, miR-24-3p, miR-3959-3p, miR-371b-3p, miR-449a, miR-15a, miR-6402, miR-6529b, miR-34c, miR-16a, miR-128-1-5p, miR-656-5p, miR-22-5p, miR-147-5p, miR-363, miR-378b, miR-320b, miR-10a-5p, miR-146b-3p, miR-34b, miR-2285ab, miR-18a-3p, miR-450b-3p, miR-1291, miR-9851-3p, miR-195a-5p, miR-379-5p, miR-181a-2-3p, miR-3065-3p, miR-490-3p, miR-1271-3p, miR-1260a, miR-30c-2-3p, miR-339a, miR-17-3p, miR-2898, miR-543-5p, miR-24-2-5p, miR-483-3p, miR-214-5p, miR-615-3p, miR-582-3p, miR-10a-5p, miR-1306-5p, miR-410-5p, miR-370-5p, miR-331-3p, miR-138-5p, miR-486b-3p, miR-204-5p, miR-370-3p, miR-615-5p, miR-34c-5p, miR-769, miR-154b-5p, miR-320a, miR-3074-1-3p, miR-485-5p, miR-1388-3p, miR-505, miR-182-5p, miR-16b, miR-130b-3p, miR-103a-2-5p, miR-381-1-3p, miR-125b-5p, miR-6740-5p, miR-664a, novel\_9, miR-181a-2-3p, miR-129-2-3p, miR-6128, miR-665-5p, miR-6525, miR-365a-5p, miR-2285c, miR-2312, miR-339b, miR-23a-5p, miR-671-5p, miR-3956, miR-125a, miR-34c-5p, miR-2284s, miR-199a-5p, miR-204-3p, miR-412-5p, miR-125b, miR-339a, miR-185-3p, miR-92a-1-5p, miR-34b-5p, novel\_96, miR-125b-2-3p, miR-199a-5p, miR-2411, miR-146a-5p, miR-2285b, miR-23b-5p, miR-5703, miR-128-3p, miR-34a-5p, novel\_79, miR-2411-5p, miR-483-3p, miR-129-1-3p, miR-412-5p, miR-4324, miR-101-3p, miR-34c, novel\_120, miR-2447, miR-541-3p, miR-6527, miR-2285f, miR-449a, miR-154a, miR-199b-5p, miR-2428, miR-2285ab, miR-199b-5p, miR-3141, miR-216a-3p, miR-450b-3p, miR-146b-5p, miR-655-5p, miR-126b-5p, miR-34b, miR-670-3p, miR-146a, miR-330-3p, miR-365b-5p, miR-3141, miR-483-3p, miR-491-5p, miR-146b, miR-199b-5p, miR-125a-5p, miR-1388-3p, miR-6240, miR-33a-5p, let-7j, miR-193a, miR-6529a, miR-1285, miR-541, miR-330-3p, novel\_4, miR-665, miR-339-5p, miR-222-5p, miR-2285g, miR-9788-3p, miR-216a-3p, miR-2355-3p, miR-411b-5p, miR-2285e

miR-499a-5p, miR-101-3p, miR-218-5p, miR-30b-5p, miR-9-3p, miR-212-3p, miR-32-3p, miR-3059-5p, miR-194b-5p, miR-96-5p, miR-9-3p, miR-493-5p, miR-221, miR-199b-5p, miR-140-5p, miR-7857-3p, miR-499a-3p, miR-27a-3p, miR-4443, miR-203-3p, miR-3064-5p, miR-2284g, miR-664b, miR-2285u, miR-487b-5p, miR-130b-3p, miR-3085-3p, miR-199b-5p, miR-323b-3p, miR-29b-1-5p, miR-2310, miR-4532, miR-101b-3p, miR-124a, miR-376b, miR-23a-3p, miR-2426, miR-3120-5p, miR-101c, miR-4791, miR-323b, miR-221-3p, miR-216a-3p, miR-151a-3p, miR-27a-3p, miR-17-3p, miR-6516-3p, miR-454-3p, miR-487a-5p, miR-30e-3p, miR-222-3p, miR-29b-2-5p, miR-664a-5p, miR-151-3p, miR-324-3p, miR-30a-3p, miR-224-5p, miR-338-3p, miR-3074-2-3p, miR-425-5p, miR-1271, miR-30f, miR-345-5p, novel\_99, miR-21a-3p, miR-30d-5p, miR-411, miR-216b-5p, miR-499b-3p, miR-548c-3p, miR-32-3p, miR-660-5p, miR-2331-3p, miR-21-3p, miR-30d, miR-2285p, miR-208b-3p, miR-196a-3p, miR-30b, miR-122-3p, miR-92a-1-5p, miR-376a-5p, miR-29b-1-5p, miR-486-3p, novel\_73, miR-2284u, miR-218-1-3p, miR-16-1-3p, miR-376a-5p, miR-215-5p, miR-30c-5p, miR-1434-5p, miR-1193, miR-188-3p, miR-124-3p, miR-200b, miR-23c, miR-23b-3p, miR-30d-3p, miR-6402, miR-2428, miR-301b-3p, miR-199b-5p, miR-17-3p, miR-376a-2-5p, miR-2319a, miR-3065-5p, miR-374c-3p, miR-196b-5p, miR-660, miR-224-5p, miR-7-5p, novel\_51, miR-194a, miR-432-3p, miR-432-3p, miR-345-5p, miR-493-5p, miR-16-1-3p, miR-2284ab, miR-27b-3p, miR-7b-5p, miR-1434-3p, miR-708-3p, miR-653, miR-194-5p, miR-3535, miR-194-3p, miR-133b-5p, miR-130a-3p, miR-486b-3p, miR-134-5p, miR-410-3p, miR-410-5p, novel\_63, miR-3969, miR-1197-3p, miR-28a-3p, miR-345-5p, miR-1814c, miR-301, miR-381-3p, miR-30e-5p, miR-23b, miR-374c-3p, miR-199a-5p, miR-133c, miR-223-5p, miR-6536, miR-200c-3p, miR-17-3p, miR-98-3p, miR-200c, miR-664-3p, miR-150b-5p, miR-192-3p, miR-210-5p, miR-224-5p, miR-32, miR-6536, miR-487b-5p, miR-92a-3p, miR-181a-2-3p, miR-432-3p, miR-432-3p, let-7a-2-3p, miR-2432, miR-1290, miR-1843b-5p, miR-6529a, miR-708-3p, miR-142-3p, let-7a-2-3p, miR-133a-3p, miR-3955-5p, miR-758-5p, miR-328-3p, miR-216a-3p, novel\_87, miR-425-5p, miR-664a, miR-92a-3p, miR-204-5p, miR-28-5p, miR-500, miR-708-5p, miR-203b-5p, miR-539-5p, miR-452-5p, miR-144-5p, miR-224-5p, miR-211, miR-6134, miR-2428, miR-409-5p, miR-3591-3p, miR-433-3p, miR-3065-5p, miR-500a-3p, miR-200a-5p, let-7g-3p, miR-876-3p, miR-6395, miR-20a-3p, miR-32-5p, miR-7-1-3p, miR-211-5p, miR-21-3p, miR-25-3p, miR-216b-5p, miR-144-5p, miR-223-5p

INTS8

ENSOARGO0 integrat

GPM6A

ENSOARGO0 glycopro

miR-129-1-3p, miR-134-5p, miR-1224-5p, miR-6517, miR-2285ad, let-7d, miR-330-5p, miR-2427, miR-1290, miR-134, miR-196a-5p, miR-345-3p, miR-192-3p, miR-1271-3p, let-7g, miR-200a, novel\_39, miR-30a-3p, miR-29b-2-5p, miR-3529-3p, miR-200a-3p, miR-181b-5p, let-7f-5p, miR-2898, miR-17-3p, let-7c-5p, miR-6119-5p, miR-125a-3p, miR-1260a, miR-141-3p, miR-2285aa, miR-671-5p, miR-1814c, miR-3074-1-3p, miR-345-5p, miR-10b-3p, miR-362-5p, miR-3154, miR-145-3p, miR-1260b, miR-133a-3p, miR-134-5p, miR-592, miR-486b-3p, miR-144, miR-100-3p, miR-6740-5p, novel\_63, miR-149-5p, let-7g-5p, miR-3535, miR-130a-3p, miR-381-5p, miR-16-1-3p, miR-1260b, miR-219a-1-3p, miR-30b-3p, miR-3071-5p, miR-374b-3p, miR-1843b-5p, miR-181a-5p, miR-873a-5p, miR-345-5p, miR-432-3p, miR-432-3p, miR-6240, miR-196b-5p, miR-2411-3p, novel\_51, miR-330-3p, miR-377-3p, miR-181b-3p, miR-144-3p, miR-677, miR-374c-3p, miR-6395, miR-505-3p, let-7e-5p, miR-1291, miR-3065-5p, miR-1306, miR-2428, miR-301b-3p, miR-326-3p, miR-17-3p, novel\_1, miR-33a-3p, let-7i, novel\_87, miR-328-3p, miR-199a-3p, miR-532-3p, miR-222-5p, miR-212-5p, miR-505-3p, miR-30d-3p, let-7a-3p, miR-361-5p, miR-33b-3p, miR-1197-5p, miR-188-3p, miR-5703, miR-1961, miR-2366, miR-1246, miR-143-3p, miR-2424, miR-486-3p, miR-181b-1-3p, miR-376a-5p, miR-29b-1-5p, miR-345-3p, let-7k, miR-21-3p, miR-98-5p, miR-92a-1-5p, miR-345-3p, novel\_17, miR-618, let-7i-5p, miR-204-3p, miR-656-3p, miR-377-3p, miR-301a-3p, miR-543-3p, miR-345-5p, miR-133b-3p, miR-27b-5p, let-7f-1-3p, miR-181c-5p, let-7b-5p, miR-224-5p, miR-142a-5p, miR-3074-2-3p, miR-129-2-3p, miR-145a-3p, miR-590-3p, let-7b, miR-454-3p, miR-17-3p, miR-29b-2-5p, miR-30a-3p, let-7f, let-7b-3p, miR-455-3p, miR-9788-3p, miR-500-5p, miR-142-5p, miR-181b-2-3p, miR-330-3p, miR-100b, miR-1343-3p, miR-30b-3p, miR-143-5p, miR-1791, miR-92a-

miR-199b-5p, miR-29c-3p, miR-206, miR-29a, miR-6123, miR-42b-5p, novel\_69, miR-6535, miR-669, miR-3074-5p, miR-3120-3p, miR-412-3p, miR-146b-5p, miR-2319a, miR-148a-3p, miR-3141, miR-3065-5p, miR-216a-3p, miR-1306, miR-432-3p, miR-432-3p, miR-2285r, miR-628-5p, miR-668-3p, miR-483-3p, miR-378a-5p, miR-146a, miR-296-3p, novel\_51, miR-3141, miR-134-3p, miR-412-5p, miR-149-5p, miR-411-5p, miR-194-3p, miR-31-5p, miR-339-5p, miR-16b, miR-497-5p, miR-542-3p, miR-2113, miR-708-3p, miR-197-3p, miR-1197-3p, miR-181a-2-3p, novel\_42, miR-193a-5p, miR-16-5p, miR-592, miR-125b-5p, miR-100-3p, miR-3068-3p, miR-874-3p, miR-574-5p, miR-1271, miR-125a, miR-542-5p, miR-1248, miR-450b-5p, novel\_39, miR-200a, miR-3064-5p, miR-152-3p, novel\_96, miR-125a-3p, miR-322-5p, novel\_121, miR-6517, novel\_79, miR-330-5p, novel\_111, miR-361-3p, miR-423-5p, miR-3956-3p, miR-2447, miR-499a-5p, novel\_82, miR-301a-5p, miR-378g, miR-4443, miR-4792, miR-211-5p, miR-3963, miR-1983, miR-376a-3p, miR-8485, miR-574-3p, miR-491-5p, miR-214-3p, miR-199b-5p, miR-146b, miR-16b, miR-323b-3p, miR-376b-3p, miR-1298-3p, miR-425-3p, novel\_78, miR-1388-5p, miR-301b-5p, miR-758-3p, miR-323b, miR-1a-3p, miR-6525, miR-769-5p, miR-3184-5p, miR-3074-5p, miR-3184-3p, miR-214, miR-130b-5p, miR-874-5p, miR-4492, miR-3604, miR-15b-5p, miR-2331-3p, miR-552-3p, miR-296-3p, miR-216b-3p, miR-339b, miR-1827, miR-625-5p, miR-655, miR-129b-3p, miR-377-5p, miR-2285i, miR-376a-5p, miR-143-3p, miR-486-3p, miR-345-3p, miR-92a-1-5p, miR-324-3p, miR-210-3p, miR-328-3p, miR-142-3p, miR-184-3p, miR-34a-5p, miR-2366, miR-211, miR-326-3p, miR-449a, miR-135a-2-3p, miR-342-3p, miR-1193, novel\_1, miR-656-5p, miR-15a, miR-16a, miR-34c, miR-29a-3p, miR-670-3p, miR-34b, miR-323a-5p, miR-146b-3p, miR-320b, miR-2285k, miR-150b-3p, miR-1291, miR-195a-5p, miR-130a-3p, miR-412-5p, miR-1298-3p, miR-185-5p, miR-147a, miR-9788-3p, miR-2284r, miR-143-5p, miR-450c-3p, miR-4508, miR-744-5p, miR-455-5p, miR-127-3p, miR-4532, miR-320b, miR-1306-5p, miR-197-5p, miR-455-5p, miR-2331-5p, miR-491-5p, miR-130b-3p, miR-660, miR-1343-5p, miR-214-3p, miR-4792, miR-299b-3p, miR-6535, miR-320c, miR-361-3p, miR-148a-3p, miR-1306, miR-450b-3p, miR-96-5p, miR-3059-5p, novel\_60, miR-335-5p, miR-3956-3p, miR-361-3p, miR-877-3p, miR-24-3p, miR-423-5p, miR-301b-3p, miR-4324, miR-28c, novel\_87, miR-128-1-5p, miR-4726-5p, miR-335, miR-490-5p, miR-299a-3p, miR-6517, miR-210-3p, miR-1271-5p, miR-148b-3p, miR-450a-1-3p, miR-214-5p, novel\_133, miR-2366, miR-1343-5p, miR-1434-5p, miR-5703, miR-4429, miR-582-3p, miR-133a-3p, miR-2385-3p, miR-181a-2-3p, miR-28b, miR-142a-3p, miR-1271-3p, miR-30f, miR-185-3p, miR-320d, miR-2898, miR-466i-5p, miR-543-5p, miR-299-3p, novel\_96, miR-152-3p, miR-2331-3p, miR-660-5p, miR-301a-3p, miR-324-5p, miR-450a-1-3p, miR-320a, let-7g-3p, miR-7144-5p, miR-485-5p, miR-1271, miR-214, novel\_44, miR-145-3p, miR-3184-5p, miR-6134, miR-551b-3p, miR-331-3p, miR-450b-3p, miR-664a, miR-454-3p

miR-128-3p, miR-411-3p, miR-214-5p, miR-6516-5p, miR-483-3p, miR-378h, miR-543-5p, miR-107, miR-450a-2-3p, miR-30c-2-3p, miR-2285af, miR-490-3p, miR-2284a, miR-1271-3p, miR-376b-5p, miR-376c-5p, miR-24-2-5p, miR-2478, miR-30a-3p, miR-3529-3p, miR-7144-5p, miR-320a, miR-17-5p, miR-503-3p, miR-204-5p, miR-144, miR-331-3p, miR-2332, miR-378c, miR-93, miR-133a-3p, miR-103b, miR-30b-3p, miR-1434-3p, miR-103, miR-20b, miR-2284d, miR-432-5p, miR-377-5p, miR-130a-3p, miR-133b-5p, miR-466f-3p, miR-1343-5p, miR-125a-5p, miR-106a-5p, miR-17-5p, miR-197-5p, miR-330-3p, miR-654-3p, miR-101-5p, miR-195a-5p, miR-6395, miR-379-5p, miR-19a-3p, miR-107, miR-2285k, miR-670-3p, miR-7-1-3p, miR-320b, miR-378b, miR-33a-3p, miR-16a, miR-6402, miR-20a-5p, miR-15a, miR-326-3p, miR-24-3p, miR-211, miR-19b-3p, miR-4429, miR-188-3p, miR-5703, miR-532-3p, novel\_83, miR-616-3p, miR-15a-5p, miR-383-5p, miR-3600, miR-106a, miR-320d, miR-125b, miR-185-3p, miR-20a, novel\_99, miR-133b-3p, miR-21a-3p, miR-139-5p, miR-193b-3p, miR-182-5p, miR-378a-3p, miR-487a-5p, miR-208b-5p, miR-424-5p, miR-6516-3p, miR-450b-3p, miR-324-3p, miR-378c, miR-3120-5p, miR-2284aa, miR-101a-5p, miR-544a, miR-378c, miR-30b-3p, miR-378b, miR-216a-3p, miR-27a-3p, miR-3955-3p, novel\_103, miR-326, miR-1306-5p, miR-320b, miR-3187-3p, miR-30c-1-3p, miR-376b, miR-33a-5p, miR-494-3p, miR-382-3p, miR-106a-5p, miR-424-5p, novel\_94, miR-129b-5p, miR-454-5p, miR-27a-3p, miR-3082-5p, miR-378e, miR-20a-3p, miR-3958-3p, miR-219a-2-3p, miR-452-5p, miR-330-5p, miR-1343-5p, miR-2284z, miR-450a-1-3p, miR-322-5p, miR-505-5p, miR-6517, miR-2285ad, novel\_96, miR-219-3p, miR-125a-3p, miR-2284y, miR-148b-5p, miR-20b-5p, miR-329b, miR-93-5p, miR-137-3p, miR-125a, miR-3956, miR-592, miR-125b-5p, miR-2284k, miR-16-5p, miR-193a-5p, miR-2284v, miR-27b-3p, miR-26a-2-3p, miR-107-

miR-146b-5p, miR-378f, miR-412-3p, miR-150-5p, miR-216a-3p, miR-376b-5p, miR-6535, miR-677, miR-144-3p, miR-181b-3p, miR-3120-3p, miR-3074-5p, miR-206, miR-2284o, novel\_87, miR-425-5p, miR-4324, miR-576-3p, miR-335-5p, miR-26a-2-3p, miR-497-5p, miR-16b, miR-16-1-3p, miR-22-3p, miR-450c-3p, novel\_23, miR-432, miR-7b-5p, novel\_116, miR-3535, miR-412-5p, miR-3431, miR-31-5p, miR-378a-5p, miR-483-3p, miR-7-5p, miR-377-3p, miR-146a, miR-6240, miR-1248, miR-2318, miR-345-5p, miR-376c-5p, miR-30e-5p, miR-3959-5p, miR-2285aa, miR-3068-3p, miR-503-3p, miR-592, miR-100-3p, miR-1197-3p, miR-16-5p, miR-144-5p, miR-28a-3p, miR-30c, miR-2427, miR-450a-1-3p, novel\_121, miR-9-5p, miR-322-5p, miR-505-5p, miR-1224-5p, miR-2285ad, miR-429-3p, miR-200a-3p, miR-28-3p, miR-30f, miR-205-5p, miR-664-3p, miR-200a, miR-29a-5p, miR-2284y, miR-450b-5p, miR-148b-5p, miR-2284f, miR-376a-3p, miR-1983, miR-9-3p, miR-136-5p, miR-144-5p, miR-4443, miR-25, miR-3596, miR-2483-3p, miR-211-5p, miR-139-5p, miR-2284g, miR-301a-5p, novel\_82, miR-2440, miR-1285-5p, miR-9-5p, let-7i-3p, miR-190b-5p, miR-3956-3p, miR-1388-5p, miR-1a-3p, miR-301b-5p, miR-148b-5p, miR-2459, miR-1298-3p, miR-376b-3p, miR-147a, miR-142-5p, miR-181b-2-3p, miR-330-3p, miR-548w, miR-146b, miR-103a-2-5p, miR-1185-5p, miR-29b-1-5p, miR-16b, miR-8485, miR-2310, miR-378d, miR-2284b, miR-1388-3p, miR-124a, miR-625-5p, miR-543-3p, miR-1827, miR-345-5p, miR-129b-3p, miR-500a-3p, miR-30d-5p, miR-433-3p, miR-2285c, miR-450a-1-3p, miR-15b-5p, miR-10a, miR-2284s, miR-377-3p, miR-582-5p, miR-552-3p, miR-548o-3p, miR-190a-5p, miR-500, miR-874-5p, miR-4492, miR-130b-5p, miR-181c-5p, miR-142a-5p, miR-769-5p, miR-6525, miR-3074-5p, miR-16-1-3p, miR-664-5p, miR-2284u, miR-148a-5p, miR-493-3p, miR-378a-3p, miR-30c-5p, miR-378i, miR-2266, miR-2284h-5p, miR-328-3p, miR-785g, miR-500a-3p, miR-125b-2-3p, miR-376a-5p, miR-490-3p, miR-2403, miR-4286, miR-181a-2-3p, miR-760-3p, miR-2898, miR-320d, miR-450a-2-3p, miR-2484, miR-30b-3p, miR-34b-5p, miR-210-5p, miR-185-3p, miR-324-3p, miR-30c-2-3p, miR-483-3p, miR-487a-3p, miR-6517, miR-3960, miR-4429, miR-493-3p, miR-496, miR-34a-5p, miR-215-5p, miR-3578, miR-330-5p, miR-5703, miR-769-5p, miR-142a-5p, miR-6134, miR-539-5p, miR-665-5p, miR-6128, miR-138-5p, miR-4492, miR-31-3p, miR-5100, miR-370-5p, miR-2433, miR-769, miR-365a-3p, miR-192-5p, miR-34c-5p, novel\_32, miR-204-3p, miR-496-3p, miR-503-3p, miR-30c-1-3p, miR-140-5p, miR-215-5p, miR-370-5p, let-7g-3p, miR-10b-3p, miR-876-3p, miR-1814c, miR-1827, miR-320a, miR-3154, miR-30c-1-3p, let-7a-2-3p, miR-2310, miR-2330-5p, miR-6240, miR-574-3p, miR-744-3p, miR-25-5p, miR-483-3p, miR-378a-5p, miR-2285o, miR-326, miR-320b, miR-3141, miR-330-3p, miR-142-5p, miR-1298-3p, miR-496-5p, miR-425-3p, miR-6238, miR-330-3p, miR-1343-3p, miR-31-5p, miR-145b, miR-138, miR-30b-3p, miR-7862, miR-744-5p, miR-4508, miR-296-5p, miR-30b-3p, miR-145a-5p, novel\_111, miR-361-3p, miR-2428, miR-449a, miR-326-3p, miR-3956-3p, miR-2447, novel\_60, miR-1193, miR-1296-5p, miR-2285t, miR-2440, miR-34c, miR-769-5p, novel\_69, miR-34b, miR-2404, miR-203-3p, miR-320c, miR-669, miR-2319b, miR-2387, miR-3141, miR-361-3p, miR-378j

miR-6516-3p, miR-3065-5p, miR-129b-5p, miR-378j, miR-181b-3p, miR-320c, miR-677, miR-2404, miR-490-5p, miR-335, miR-499a-5p, miR-4726-5p, miR-7705, miR-495-3p, miR-335-5p, miR-3956-3p, miR-2447, novel\_60, miR-3120-5p, miR-450b-5p, miR-7b-5p, miR-1843b-5p, miR-653, miR-19b-2-5p, miR-539-5p, miR-153, miR-187-3p, miR-153-3p, miR-2331-5p, miR-296-3p, miR-320b, miR-7-5p, miR-296-3p, miR-33a-5p, miR-382, miR-1248, miR-10a-3p, miR-320a, miR-30d-5p, miR-503-3p, miR-30e-5p, miR-204-3p, miR-376e-3p, miR-6516, miR-296-3p, miR-503-3p, miR-140-5p, miR-410-3p, miR-6516-3p, miR-655-3p, miR-19b-1-5p, miR-100-3p, miR-338-3p, miR-6134, miR-539-5p, miR-4429, miR-1434-5p, miR-30a-5p, miR-1290, novel\_83, miR-6516-5p, miR-21-3p, miR-6536, miR-127-5p, miR-320d, miR-500a-5p, miR-2285p, novel\_17, miR-376c-5p, miR-2432, miR-2424, miR-10a-3p, miR-30c-1-3p, miR-552-3p, miR-370-5p, miR-544-3p, miR-10a, miR-15b-5p, miR-299, miR-30d-5p, miR-30f, novel\_99, miR-425-5p, miR-665-5p, miR-10b-5p, miR-6516-3p, miR-424-5p, miR-190a-5p, miR-106a, miR-548e-3p, miR-18a-3p, miR-212-5p, miR-15a-5p, miR-7859, miR-2284h-5p, miR-30c-5p, miR-140-3p, miR-34a-5p, miR-2285w, miR-20a, miR-29b-1-5p, miR-486-3p, miR-30b, miR-500a-5p, miR-466i-5p, miR-106a, miR-34b-5p, miR-30d, miR-3653-3p, miR-20a-3p, miR-2483-3p, miR-27a-3p, miR-199b-5p, miR-381-3p, miR-3956-3p, miR-541-3p, miR-212-3p, novel\_60, miR-190b-5p, miR-218-5p, miR-30b-5p, miR-301a-5p, miR-371a-5p, miR-499a-5p, miR-374a-3p, miR-330-3p, novel\_78, miR-27a-3p, miR-10b, miR-541, miR-301b-5p, miR-125b-2-3p, miR-544a, miR-101c, miR-424-5p, miR-106a-5p, miR-30c-1-3p, miR-1b-5p, miR-8485, miR-106b-5p, miR-16b, miR-29b-1-5p, miR-199b-5p, miR-3068-3p, miR-874-3p, miR-2355-5p, miR-3959-5p, miR-34c-5p, miR-199a-5p, miR-301, miR-30e-5p, miR-376c-5p, miR-17-5p, miR-93-5p, miR-671-5p, miR-7144-5p, miR-20b-5p, miR-376c-5p, miR-28a-3p, miR-16-5p, miR-374a-3p, miR-93, miR-370-5p, novel\_63, miR-374b-3p, miR-592, miR-486b-3p, miR-376a-5p, miR-322-5p, miR-505-5p, novel\_121, miR-30a-5p, miR-10a-5p, miR-30c, miR-450b-5p, miR-199a-5p, miR-376c-5p, miR-125a-3p, miR-2285af, miR-30f, miR-30c-2-3p, miR-3071-3p, miR-28-3p, novel\_127, miR-3120-3p, miR-10a-5p, miR-34b, miR-669, miR-376b-5p, miR-18a-3p, miR-195a-5p, miR-376a-2-5p, miR-1193, miR-199b-5p, miR-449a, miR-20a-5p, miR-4324, miR-502-5p, miR-15a, miR-33a-3p, miR-16a, miR-34c, miR-147-5p, miR-203b-5p, miR-20b, miR-544b, miR-6238, miR-1285, miR-708-3p, miR-873a-5p, miR-219a-1-3p, miR-16b, miR-27b-3p, miR-497-5p, miR-6240, miR-654-3p, miR-17-5p, miR-106a-5p, miR-330-3p, miR-190a

RGS7BP ENSOARGO( regulato

RCAN3 ENSOARGO( RCAN fam



|       |                    |                                                                                                                                                                                                                                                                                                                                                                                                                                                                                                                                                                                                                                                                                                                                                                                                                                                                                                                                                                                                                                                                                                                                                                                                                                                                                                                                                                                                                                                                                                                                                                                                                                                                                                                                                                                                                                                                                                                                                                                                                                                                                                                                                                                                                                                                                                                                                                                                                                                                                          |
|-------|--------------------|------------------------------------------------------------------------------------------------------------------------------------------------------------------------------------------------------------------------------------------------------------------------------------------------------------------------------------------------------------------------------------------------------------------------------------------------------------------------------------------------------------------------------------------------------------------------------------------------------------------------------------------------------------------------------------------------------------------------------------------------------------------------------------------------------------------------------------------------------------------------------------------------------------------------------------------------------------------------------------------------------------------------------------------------------------------------------------------------------------------------------------------------------------------------------------------------------------------------------------------------------------------------------------------------------------------------------------------------------------------------------------------------------------------------------------------------------------------------------------------------------------------------------------------------------------------------------------------------------------------------------------------------------------------------------------------------------------------------------------------------------------------------------------------------------------------------------------------------------------------------------------------------------------------------------------------------------------------------------------------------------------------------------------------------------------------------------------------------------------------------------------------------------------------------------------------------------------------------------------------------------------------------------------------------------------------------------------------------------------------------------------------------------------------------------------------------------------------------------------------|
| UGCG  | ENSOARGO(UDP-gluc  | <p>let-7a-2-3p, let-7g, miR-130a-5p, miR-450b-5p, miR-3529-3p, let-7a-5p, let-7e, let-7k, miR-1468, miR-181b-5p, miR-98-5p, let-7f-5p, miR-2284m, miR-217, let-7c-5p, miR-320b, miR-126a-5p, let-7g-5p, miR-2284d, miR-376a-5p, let-7a-2-3p, miR-1839-5p, let-7d, miR-4429, miR-2284ab, miR-217-5p, miR-23b-5p, miR-1961, let-7b-5p, miR-2284j, miR-181d-5p, miR-136-3p, let-7b, miR-129-5p, miR-410-3p, miR-1468-5p, miR-3604, let-7i, let-7f, miR-2284k, miR-2284n, let-7i-5p, let-7d-5p, miR-300-3p, miR-2285u, let-7e-5p, novel_99, miR-376a-2-5p, let-7g-3p, miR-3065-5p, miR-320a, miR-217-5p, miR-30d-3p, miR-200b, miR-125b, miR-34b-3p, miR-466i-5p, miR-195a-3p, miR-380-3p, miR-143-3p, miR-146a-5p, miR-181b-1-3p, miR-377-5p, miR-29b-1-5p, miR-376a-5p, miR-433-3p, novel_99, miR-582-5p, miR-625-5p, miR-345-5p, miR-182-5p, miR-532-5p, miR-496-3p, miR-504-5p, miR-6516, miR-376e-3p, miR-582-5p, miR-338-5p, miR-132-5p, miR-19b-1-5p, miR-15b-3p, miR-425-5p, miR-125b-2-3p, miR-323b, miR-4791, miR-301b-5p, miR-484, miR-181b-2-3p, miR-27a-3p, miR-105-1, miR-548w, miR-9788-3p, miR-455-3p, miR-182-5p, miR-29b-1-5p, miR-323b-3p, miR-326, novel_115, miR-342, miR-103a-2-5p, miR-146b, miR-3085-3p, miR-652-5p, miR-382-3p, miR-2330-5p, miR-1388-3p, miR-381-3p, novel_94, miR-136-5p, miR-504, miR-126b-5p, miR-499b-5p, miR-452-3p, miR-3064-5p, miR-24-1-5p, miR-27a-3p, miR-107-5p, miR-301a-5p, miR-371a-5p, miR-101-3p, miR-2284q, miR-452-5p, miR-9-5p, miR-1296-5p, miR-212-3p, miR-3059-5p, miR-154a, miR-877-3p, miR-330-5p, miR-23b-5p, miR-2427, miR-134, miR-345-3p, miR-496, miR-105-2, miR-200b-3p, miR-376a-5p, miR-429-3p, miR-134-5p, miR-6516-5p, miR-758-5p, miR-9-5p, miR-24-2-5p, miR-217, miR-2285af, miR-200c-3p, miR-2898, miR-495-5p, miR-3064-5p, miR-1271-3p, miR-1957a, miR-24-2-5p, miR-137-3p, miR-503-3p, miR-671-5p, miR-345-5p, miR-125a, miR-370-3p, miR-503-3p, miR-3068-3p, miR-300-3p, miR-331-5p, miR-3969, miR-125b-5p, miR-134-5p, miR-3071-5p, miR-197-3p, miR-19b-2-5p, miR-27b-3p, miR-455-5p, miR-2284x, miR-380-3p, miR-377-5p, miR-31-5p, miR-3431, miR-3535, miR-2285g, miR-455-5p, miR-2411-3p, miR-105-5p, miR-146a, miR-466f-3p, miR-125a-5p, miR-452-5p, miR-124-5p, miR-382, miR-345-5p, let-7j, miR-432-3p, miR-654-3p, miR-432-3p, miR-6516-3p, miR-376a-2-5p, miR-146b-5p, miR-655-5p, miR-181b-3p, miR-677, miR-6402, miR-4324, miR-656-5p, miR-2285v, miR-342-3p, novel_120, miR-135a-2-3p, miR-</p> |
| PHF14 | ENSOARGO( PHD fing |                                                                                                                                                                                                                                                                                                                                                                                                                                                                                                                                                                                                                                                                                                                                                                                                                                                                                                                                                                                                                                                                                                                                                                                                                                                                                                                                                                                                                                                                                                                                                                                                                                                                                                                                                                                                                                                                                                                                                                                                                                                                                                                                                                                                                                                                                                                                                                                                                                                                                          |

miR-532-3p, miR-322-5p, miR-483-3p, miR-15a-5p, miR-1b-3p, miR-18a-3p, miR-345-3p, miR-126-3p, miR-486-3p, novel\_127, miR-28-3p, miR-92a-1-5p, miR-345-3p, miR-185-3p, miR-1260a, miR-125a-3p, miR-15b-5p, miR-877-5p, miR-6130, miR-370-5p, miR-21-3p, miR-552-3p, miR-874-3p, miR-485-5p, miR-329b, miR-487b-5p, miR-6134, miR-346, miR-1260b, miR-16-5p, miR-665-5p, miR-2330-3p, miR-28a-3p, miR-4510, miR-3074-5p, miR-4492, miR-424-5p, miR-486b-3p, miR-130b-5p, miR-100-3p, miR-324-3p, miR-370-5p, miR-494-5p, miR-9788-3p, miR-149-5p, miR-1185-3p, novel\_4, novel\_78, miR-497-5p, miR-3120-5p, miR-16b, miR-1260b, miR-2426, miR-7b-5p, miR-541, miR-542-3p, miR-654-3p, miR-363-5p, let-7f-2-3p, let-7f-2-3p, miR-130b-5p, miR-424-5p, miR-483-3p, miR-3955-3p, miR-197-5p, miR-2411-3p, miR-16b, miR-7-5p, miR-1306-5p, miR-1185-2-3p, miR-146b-3p, miR-541-5p, novel\_68, miR-4792, miR-3074-5p, miR-378b, miR-195a-5p, novel\_94, miR-1306, miR-3591-3p, miR-18a-3p, miR-8095, miR-154a, miR-1193, miR-541-3p, miR-16a, miR-576-3p, miR-30b-3p, miR-1260b, miR-7862, miR-374b-3p, miR-412-5p, miR-185-5p, let-7g-5p, miR-3431, miR-6238, novel\_116, miR-149-5p, miR-194-3p, miR-31-5p, miR-133b-5p, miR-339-5p, miR-378a-5p, miR-125a-5p, miR-466f-3p, novel\_51, miR-432-3p, miR-363-5p, miR-1291, let-7e-5p, miR-6395, miR-378f, miR-150-5p, miR-1306, miR-18a-3p, miR-378b, miR-299b-3p, miR-374c-3p, miR-677, miR-669, miR-181b-3p, miR-3120-3p, miR-6529b, miR-576-3p, let-7i, miR-211, miR-326-3p, miR-2284w, miR-335-5p, miR-1839-3p, miR-17-3p, novel\_101, miR-495-3p, let-7d, miR-1290, miR-330-5p, miR-2411-5p, miR-378h, miR-2285ad, miR-299a-3p, novel\_79, miR-412, miR-17-3p, miR-127-5p, miR-191-3p, let-7f-5p, miR-543-5p, novel\_127, miR-205-5p, miR-1260a, miR-125a-3p, miR-339a, let-7c-5p, miR-148b-5p, miR-450b-5p, novel\_39, let-7g, miR-3065-3p, miR-1271-3p, miR-490-3p, miR-3064-5p, miR-495-5p, miR-4286, miR-2474, miR-7144-5p, miR-23a-5p, miR-671-5p, miR-1248, miR-485-5p, miR-3154, miR-374c-3p, miR-769, miR-324-5p, miR-874-3p, miR-2355-5p, miR-370-3p, miR-1271, miR-615-5p, miR-125a, miR-28-5p, miR-486b-3p, miR-204-5p, miR-331-3p, miR-125b-5p, miR-1260b, miR-378c, novel\_42, miR-103b, miR-378c, miR-1839-5p, miR-484, miR-296-5p, miR-378b, miR-2284r, miR-301b-5p, miR-541, miR-412-3p, miR-125b-2-3p, miR-30b-3p, miR-539-5p, miR-147a, miR-455-3p, miR-148b-5p, novel\_4, miR-1343-3p, miR-181b-2-3p, miR-3085-3p, miR-3955-3p, miR-1468, let-7e, miR-214-3p, miR-326, miR-1306-5p, miR-2957, miR-378d, miR-8485, let-7a-5p, miR-1839-3p, miR-33a-5p, miR-147-3p, miR-504, miR-335-3p, miR-877-3p, miR-361-3p, miR-378j, miR-378e, let-7d-5p, miR-4443, miR-3064-5p, miR-20a-3p, miR-211-5p, miR-4726-5p, miR-3968, miR-335, miR-2285n, miR-218-5p, miR-769-5p, miR-2285y, miR-301a-5p, miR-361-3p, miR-3059-5p, miR-541-3p, let-7i-3p, miR-219a-5p, miR-184-3p, miR-133a-3p, miR-148a-5p, miR-361-5p, miR-

NIPAL3 ENSOARGO(NIPA-lik

BCAR1 ENSOARGO(breast c

|        |                   |                                                                                                                                                                                                                                                                                                                                                                                                                                                                                                                                                                                                                                                                                                                                                                                                                                                                                                                                                                                                                                                                                                                                                                                                                                                          |
|--------|-------------------|----------------------------------------------------------------------------------------------------------------------------------------------------------------------------------------------------------------------------------------------------------------------------------------------------------------------------------------------------------------------------------------------------------------------------------------------------------------------------------------------------------------------------------------------------------------------------------------------------------------------------------------------------------------------------------------------------------------------------------------------------------------------------------------------------------------------------------------------------------------------------------------------------------------------------------------------------------------------------------------------------------------------------------------------------------------------------------------------------------------------------------------------------------------------------------------------------------------------------------------------------------|
| STPG1  | ENSOARGO(sperm-ta | <p>miR-486-3p, miR-345-5p, miR-1271-3p, miR-432-3p, miR-668-3p, miR-628-5p, miR-21-3p, miR-466f-3p, miR-214-3p, miR-760-3p, miR-339a, miR-326, miR-339-5p, novel_79, miR-3960, miR-30b-3p, miR-3432b, miR-1197-5p, miR-330-5p, miR-30b-3p, miR-296-5p, miR-541, miR-1843b-5p, miR-326-3p, miR-24-3p, miR-214, miR-665-5p, miR-145a-3p, miR-541-3p, miR-486b-3p, miR-6123, miR-4726-5p, miR-100-3p, miR-370-3p, miR-339b, miR-345-5p, miR-345-5p, miR-21a-3p</p> <p>miR-296-5p, miR-541, miR-300, miR-219a-1-3p, miR-34a-5p, miR-2284x, miR-2285ad, miR-199b-3p, miR-6517, miR-2284d, miR-151-5p, miR-125b, miR-185-3p, miR-2284m, miR-125a-5p, miR-34b-5p, miR-1388-3p, miR-101b-3p, miR-101-5p, miR-125b-2-3p, miR-486-3p, miR-8485, miR-361-3p, miR-488-3p, miR-381-3p, miR-139-</p>                                                                                                                                                                                                                                                                                                                                                                                                                                                                   |
| MLF2   | ENSOARGO(myeloid  | <p>5p, miR-125a, miR-34c-5p, miR-139-5p, novel_69, miR-489, miR-34b, miR-151b, miR-2284n, miR-2284k, miR-4324, miR-2440, miR-34c, miR-125b-5p, miR-2285y, miR-4726-5p, miR-4492, miR-199c, miR-486b-3p, miR-4454, miR-2284v, miR-541-3p, miR-2285x, novel_101, miR-2284j, miR-361-3p, miR-423-5p, miR-449a, miR-3184-5p, miR-6134</p> <p>miR-382-5p, miR-4324, novel_101, miR-17-3p, miR-326-3p, miR-24-3p, miR-3065-5p, miR-21c, miR-505-3p, miR-378f, miR-6516-3p, miR-146b-5p, miR-107, miR-26b-5p, miR-3120-3p, miR-378b, miR-181b-3p, miR-320c, miR-677, miR-194a, miR-190a, miR-330-3p, miR-105-5p, miR-365b-5p, miR-146a, miR-660, miR-124-5p, miR-363-5p, miR-668-3p, miR-6240, miR-493-5p, miR-194-5p, novel_23, miR-450c-3p, miR-181a-5p, miR-2113, miR-223-3p, miR-432, miR-744-5p, miR-27b-3p, miR-26a-2-3p, miR-16-1-3p, miR-21-5p, miR-339-5p, miR-103a-3p, miR-3955-5p, miR-103, miR-3431, miR-432-5p, miR-409-3p, miR-100-3p, miR-331-3p, miR-5100, miR-34c-3p, miR-2433, miR-486b-3p, miR-410-3p, novel_9, miR-1306-5p, miR-365a-5p, miR-181c-3p, miR-378c, miR-1197-3p, miR-320a, miR-137-3p, miR-503-3p, miR-1814c, miR-190a-3p, miR-7144-5p, miR-215-5p, miR-300-3p, miR-339a, miR-125a-3p, miR-200c, novel_96, miR-543-5p, miR-</p> |
| RNF180 | ENSOARGO(ring fin | <p>107, miR-200c-3p, miR-181b-5p, miR-17-3p, miR-2898, miR-2385-3p, miR-450c-5p, miR-29a-5p, miR-24-2-5p, miR-450b-5p, miR-330-5p, miR-105-2, miR-200b-3p, miR-431, miR-7641, novel_79, miR-429-3p, miR-450a-1-3p, miR-378h, miR-9-5p, miR-24-2-5p, miR-218-5p, miR-3964, miR-450a-5p, miR-194b-5p, miR-190b-5p, miR-181d-5p, miR-9-5p, miR-452-5p, miR-3956-3p, miR-885-5p, miR-2447, novel_60, miR-7705, miR-1285-5p, miR-493-5p, miR-668-5p, miR-181a-3p, miR-7977, miR-2285u, miR-24-1-5p, miR-139-5p, miR-27a-3p, miR-7857-3p, miR-378e, miR-326, miR-431-5p, miR-320b, miR-146b, miR-3955-3p, miR-491-5p, miR-33a-5p, miR-744-3p, miR-494-3p, miR-101b-3p, miR-2310, miR-193a, miR-378d, miR-378b, miR-6529a, miR-101c, miR-378c, miR-181b-2-3p, miR-27a-3p, miR-151a-3p, miR-105-1, novel_78, miR-330-3p, miR-548w, miR-338-5p, miR-665, miR-655-3p, miR-151-3p, miR-190a-5p, miR-6516-3p, miR-17-3p, miR-450b-3p, miR-145a-3p, miR-378c, miR-539-5p, miR-338-3p, miR-</p>                                                                                                                                                                                                                                                                        |

miR-450a-1-3p, miR-433-3p, miR-655, miR-129b-3p, miR-339b, miR-345-5p, miR-1827, miR-625-5p, miR-543-3p, miR-32-5p, miR-30c-1-3p, miR-552-3p, miR-216b-3p, miR-377-3p, miR-15b-5p, let-7i-5p, miR-30e-3p, miR-15b-3p, let-7f, miR-664a-5p, miR-665, miR-219b-3p, miR-30a-3p, novel\_74, miR-130b-5p, miR-129-5p, miR-874-5p, miR-4492, let-7b, miR-3958-5p, miR-1961, miR-33b-3p, miR-142-3p, miR-361-5p, miR-106a, miR-30d-3p, miR-212-5p, miR-23c, miR-7859, miR-23b-3p, miR-328-3p, miR-2284h-5p, miR-2285p, miR-210-5p, miR-98-5p, let-7k, miR-195a-3p, miR-378j, miR-381-3p, miR-136-5p, miR-3963, miR-211-5p, miR-2285u, miR-7689-3p, miR-3596, miR-378g, miR-1185-2-3p, miR-3956-3p, miR-2447, miR-9-5p, novel\_111, miR-361-3p, miR-329-3p, miR-2284r, miR-362-3p, miR-1839-5p, miR-330-3p, novel\_78, miR-145b, miR-181b-2-3p, miR-147a, miR-153, miR-2459, miR-1185-3p, miR-106b-5p, miR-16b, miR-505, miR-491-5p, miR-1185-5p, miR-103a-2-5p, miR-153-3p, miR-199b-5p, miR-124a, miR-23a-3p, miR-331-5p, miR-23b, miR-93-5p, miR-329a, miR-345-5p, miR-876-3p, miR-20b-5p, miR-574-5p, miR-125a, miR-2355-5p, miR-300-3p, miR-331-5p, miR-2284k, novel\_63, miR-125b-5p, miR-6740-5p, miR-331-5p, miR-134-5p, miR-592, novel\_42, miR-16-5p, miR-1260b, miR-330-5p, miR-1343-5p, miR-6517, miR-2285ad, miR-18b-5p, novel\_79, miR-9-5p, miR-322-5p, novel\_121, miR-486-5p, miR-134-5p, miR-450a-1-3p, miR-664-3p, miR-125a-3p, miR-219-3p, miR-30f, miR-1a-2-5p, let-7f-5p, miR-200a-3p, novel\_96, miR-3064-5p, miR-92b-3p, miR-2285b, let-7g, novel\_39, miR-29a-5p, miR-216a-3p, miR-150-5p, miR-410-5p, let-7e-5p, novel\_68, novel\_69, miR-181b-3p, miR-677, miR-142b, miR-576-3p, miR-4324, miR-1247-3p, miR-6123, miR-335-5p, miR-1a-1-5p, miR-199b-5p, miR-2113, miR-542-3p, miR-1843b-5p, miR-450c-3p, miR-16b, miR-2284v, miR-107-5p, miR-340-

miR-185-3p, miR-34b-5p, miR-299-3p, miR-760-3p, miR-466i-5p, miR-2887, miR-183-5p, miR-2285w, miR-2424, miR-2411, miR-486-3p, miR-124-3p, miR-1197-5p, miR-5703, miR-193b-5p, miR-2300b-3p, miR-378d, miR-34a-5p, miR-3600, miR-212-5p, miR-18a-3p, miR-2284h-5p, miR-532-3p, miR-328-3p, miR-148b-3p, miR-15a-5p, miR-19b-1-5p, miR-324-3p, miR-132-5p, miR-29d-5p, miR-664a-5p, miR-665, miR-487a-5p, miR-874-5p, miR-708-5p, miR-424-5p, miR-4492, miR-1468-5p, miR-664a, miR-214, miR-3074-2-3p, miR-665-5p, miR-2330-3p, miR-129-2-3p, miR-145a-3p, miR-4510, miR-122-5p, miR-3184-5p, miR-6134, miR-338-3p, novel\_44, miR-206-3p, miR-29c-5p, miR-543-3p, miR-1895, miR-1827, miR-2312, miR-339b, miR-345-5p, miR-3065-3p, miR-552-3p, miR-30c-1-3p, miR-2331-3p, miR-22-3p, novel\_32, miR-15b-5p, miR-544-3p, miR-6130, miR-193b-3p, novel\_19, miR-16b, miR-5126, miR-1306-5p, miR-214-3p, miR-1468, miR-103a-2-5p, miR-491-5p, miR-3085-3p, miR-376b, miR-652-5p, miR-124a, miR-424-5p, miR-491-3p, miR-30c-1-3p, miR-412-3p, miR-30b-3p, miR-296-5p, miR-2284r, miR-143-5p, miR-541, miR-301b-5p, miR-544a, novel\_78, miR-199b-3p, novel\_4, miR-330-3p, miR-2300a-5p, miR-1343-3p, miR-455-3p, miR-9788-3p, miR-147a, miR-107-5p, miR-301a-5p, miR-218-5p, miR-615, miR-1843a-3p, miR-4726-5p, miR-2285f, miR-6527, miR-3059-5p, miR-541-3p, miR-423-5p, miR-361-3p, miR-877-3p, miR-1306-3p, miR-361-3p, miR-147-3p, miR-7977, miR-4792, miR-3064-5p, miR-2319b, miR-4443, miR-3596, miR-7857-3p, miR-25, miR-30c-2-3p, miR-30f, miR-339a, miR-1260a, miR-125a-3p, miR-8117, miR-152-3p, novel\_96, novel\_127, miR-191-3p, miR-127-5p, miR-3064-5p, miR-4286, novel\_39, miR-3065-3p, miR-2478, miR-28b, miR-29d-3p, miR-1343-5p, miR-615-3p, miR-134, novel\_79, miR-412, miR-299a-3p, miR-6517, miR-582-3p, miR-134-5p, miR-214-5p, miR-129-1-3p, miR-322-5p, miR-505-

miR-758-3p, miR-33a-5p, miR-382-3p, miR-308b-3p, miR-395b-3p, miR-362-3p, miR-320b, novel\_103, novel\_115, miR-326, miR-1306-5p, miR-2285e, miR-2300a-5p, miR-2284aa, miR-378c, miR-544a, miR-2426, miR-378b, miR-8095, miR-1296-5p, miR-2285f, miR-452-5p, miR-181d-5p, novel\_60, miR-541-3p, miR-2284q, miR-769-5p, miR-371a-5p, miR-7857-3p, miR-378e, miR-541-5p, miR-3064-5p, miR-20a-3p, novel\_94, miR-129b-5p, miR-2411, miR-2432, miR-29b-1-5p, miR-125b-2-3p, miR-5100, miR-216c-5p, miR-34b-5p, miR-299-3p, miR-320d, miR-2284m, miR-216a-5p, miR-196a-3p, novel\_83, miR-199a-3p, miR-532-3p, miR-487a-3p, miR-222-5p, miR-3600, miR-485-3p, miR-4429, miR-124-3p, miR-1197-5p, miR-188-3p, miR-140-3p, miR-362-3p, miR-376a-5p, miR-2408, miR-338-3p, miR-3074-2-3p, miR-378c, miR-450b-3p, miR-155-5p, miR-17-3p, miR-320e, miR-655-3p, miR-22-3p, miR-204-3p, miR-155-5p, miR-544-3p, miR-139-5p, miR-182-5p, miR-378a-3p, novel\_99, let-7g-3p, miR-2312, miR-539-3p, miR-363-5p, miR-1343-5p, miR-197-5p, miR-544b, miR-2285g, miR-432-5p, miR-665, miR-380-3p, miR-138, miR-2284ab, miR-145a-5p, miR-374b-3p, miR-873a-5p, miR-181a-5p, novel\_27, miR-326-3p, miR-449a, miR-2428, miR-24-3p, miR-495-3p, miR-17-3p, miR-22-5p, miR-502b, novel\_1, miR-34c, miR-6402, miR-34b, miR-378b, miR-376a-2-5p, miR-450b-3p, miR-2285ab, miR-490-3p, miR-450a-2-3p, miR-17-3p, miR-181b-5p, miR-2285af, miR-378h, miR-2411-5p, miR-196a-2-3p, miR-376a-5p, miR-300, miR-615-3p, miR-345-3p, miR-134, miR-378c, miR-365a-5p, miR-1306-5p, miR-138-5p, miR-331-3p, miR-2284n, miR-3957, miR-34c-5p, miR-769, miR-370-3p, miR-141-3p, miR-3957-5p, miR-1814c, miR-671-5p, miR-320a, miR-488-3p, miR-381-3p, miR-8485, miR-1b-5p, miR-2310, miR-378d, miR-124a, miR-1388-3p, miR-153-3p, miR-491-5p, miR-29b-1-5p, miR-182-5p, miR-199a-3p, miR-152, miR-1298-3p, miR-145b, miR-1242-3p, miR-16b, miR-2284ab, miR-497-5p, miR-1285, miR-484, miR-7857, miR-15a-5p, miR-2284d, miR-322-5p, miR-199a-3p, miR-199b-3p, miR-2284m, miR-193a-3p, miR-21-3p, miR-199a-3p, miR-16b, miR-324-3p, miR-424-5p, miR-216c-5p, miR-186-5p, miR-195a-5p, miR-7144-5p, miR-21a-3p, miR-2483-3p, miR-193b-3p, miR-15b-5p, miR-503-3p, miR-370-3p, miR-7689-3p, miR-2355-5p, miR-199c, miR-424-5p, miR-15a, miR-16a, miR-331-3p, miR-145-3p, miR-2284v, miR-495-3p, miR-2330-3p, miR-193b-3p, miR-16-5p, miR-371b-3p, miR-30c-1-3p, miR-3064-5p, miR-3085-3p, miR-101-3p, novel\_87, miR-30c-2-3p, miR-328-3p, miR-3064-5p, miR-30c-1-3p, miR-1271, miR-18b-5p, miR-212-5p, miR-18a-5p, miR-6395, miR-378d, miR-1839-5p, miR-101c, miR-18b, miR-18a, miR-450a-2-3p, miR-16-1-3p, miR-16-1-3p, miR-7-5p, miR-7b-5p, miR-331-3p, miR-330-3p, miR-2904, miR-182-5p, miR-6525, miR-6240, miR-330-3p, miR-196a-2-3p, miR-182-5p

SLFN14 ENSOARGO(schlafen)

YAP1 ENSOARGO(yorkie h)

UCK1 ENSOARGO(uridine-)

TDRD9 ENSOARGO(tudor do)

miR-15b-5p, miR-204-3p, miR-216b-5p, miR-193b-3p, miR-132-5p, miR-10a, miR-296-3p, miR-3065-3p, miR-30c-1-3p, miR-2331-3p, miR-1827, let-7g-3p, miR-3184-5p, miR-10b-5p, miR-214, miR-145a-3p, miR-129-2-3p, miR-424-5p, miR-4492, miR-324-3p, miR-132-5p, miR-2285j, miR-328-3p, miR-2284h-5p, miR-15a-5p, miR-3600, miR-18a-3p, miR-34a-5p, miR-133a-3p, miR-142-3p, miR-2904, miR-2408, miR-143-3p, miR-486-3p, miR-421-5p, miR-2285w, miR-34b-5p, miR-760-3p, miR-202-5p, miR-92a-1-5p, miR-125b, miR-185-3p, miR-324-3p, miR-4443, miR-500-3p, miR-7977, miR-3064-5p, miR-147-3p, miR-361-3p, miR-423-5p, miR-502-3p, miR-877-3p, miR-1296-5p, miR-2447, miR-1973, miR-9788-3p, miR-496-5p, novel\_4, miR-16-2-3p, miR-450b-5p, miR-2426, miR-501-3p, miR-10b, miR-4791, miR-4532, miR-8485, miR-30c-1-3p, miR-744-3p, miR-424-5p, miR-214-3p, miR-3085-3p, novel\_124, miR-16b, miR-326, miR-1306-5p, miR-154b-5p, miR-365a-3p, miR-34c-5p, miR-615-5p, miR-1271, miR-125a, miR-2355-5p, miR-874-3p, miR-671-5p, miR-485-5p, let-7g-3p, miR-137-3p, miR-16-5p, miR-486b-3p, miR-3969, miR-125b-5p, miR-2433, miR-129-1-3p, miR-302a-5p, miR-322-5p, miR-1224-5p, miR-2285ad, miR-10a-5p, let-7a-2-3p, miR-128-3p, miR-501-3p, miR-330-5p, miR-3065-3p, miR-148b-5p, miR-495-5p, miR-3064-5p, novel\_127, miR-543-5p, miR-2898, miR-30c-2-3p, miR-669, miR-34b, miR-10a-5p, miR-195a-5p, miR-6395, miR-1291, miR-216a-3p, miR-18a-3p, miR-1306, miR-2428, novel\_27, miR-326-3p, miR-449a, miR-193b-3p, miR-421-5p, miR-425-5p, miR-16a, miR-34c, miR-6529b, miR-502-5p, miR-4324, miR-15a, miR-2355-3p, miR-432-5p, miR-3535, miR-340-3p, miR-497-5p, miR-16b, miR-1843b-5p, miR-432, let-7a-2-3p, miR-363-5p, miR-193a-3p, miR-125a-5p, novel\_51

miR-497-5p, miR-16b, miR-450c-3p, miR-22-3p, miR-1843b-5p, miR-7b-5p, miR-194-3p, miR-149-5p, miR-3431, miR-134-3p, miR-412-5p, miR-31-5p, miR-378a-5p, miR-2411-3p, miR-2285v, miR-3141, miR-7-5p, let-7j, miR-432-3p, miR-628-5p, miR-668-3p, miR-216a-3p, miR-3591-3p, miR-3065-5p, miR-1306, miR-150-5p, miR-3141, miR-376b-5p, miR-669, miR-320c, miR-6123, miR-206, miR-6119-3p, novel\_87, miR-1307-5p, miR-576-3p, miR-28c, miR-4324, miR-758-5p, miR-330-5p, miR-1290, miR-129-1-3p, miR-134-5p, miR-450a-1-3p, miR-758-5p, miR-322-5p, miR-18b-5p, miR-412, miR-1224-5p, miR-429-3p, novel\_96, miR-200a-3p, miR-664-3p, miR-125a-3p, miR-205-5p, miR-450c-5p, miR-2285b, miR-200a, miR-29a-5p, miR-450b-5p, miR-3064-5p, miR-1248, miR-345-5p, miR-2318, miR-376c-5p, miR-300-3p, miR-125a, miR-2355-5p, miR-134-5p, miR-125b-5p, miR-1260b, miR-16-5p, miR-758-3p, miR-1a-3p, miR-301b-5p, miR-541, miR-1298-3p, miR-199b-3p, miR-1343-3p, novel\_78, miR-487b-5p, miR-491-5p, miR-16b, miR-505, miR-1b-5p, miR-8485, miR-544-5p, miR-136-5p, miR-504, miR-140-5p, miR-2483-3p, miR-378g, miR-4792, miR-3964, miR-490-5p, miR-3968, miR-301a-5p, novel\_82, novel\_111, miR-361-3p, miR-2447, miR-34a-5p, miR-218-1-3p, miR-142-3p, miR-493-3p, miR-2366, miR-212-5p, miR-380-5p, miR-345-3p, miR-210-5p, novel\_17, miR-2285p, miR-143-3p, miR-377-5p, miR-186-5p, miR-625-5p, miR-345-5p, miR-655, miR-129b-3p, miR-450a-1-3p, miR-2285c, miR-15b-5p, miR-2331-3p, miR-504-5p, miR-30c-1-3p, miR-130b-5p, miR-874-5p, miR-769-5p, miR-129-2-3p, miR-3184-3p, miR-455-5p, miR-1260b, miR-30b-3p, miR-1434-3p, miR-1285, miR-2285g, miR-377-5p, miR-466f-3p, miR-125a-5p, miR-124-5p, miR-455-5p, miR-197-5p, miR-345-5p, miR-654-3p, miR-130b-5p, miR-195a-5p, miR-9851-3p, miR-18b, miR-2387, miR-2285ab, miR-34b, miR-222a-5p, miR-655-5p, miR-320b, miR-



novel\_60, miR-30b9-5p, miR-219a-5p, miR-2285f, miR-30b-5p, miR-382-3p, miR-371a-5p, miR-769-5p, miR-2285t, miR-452-3p, miR-7977, miR-499b-5p, miR-378e, miR-7857-3p, miR-199b-5p, miR-361-3p, novel\_94, miR-877-3p, miR-424-5p, miR-33a-5p, miR-758-3p, miR-3187-3p, miR-193a, miR-326, novel\_115, miR-1306-5p, novel\_124, novel\_4, miR-222-5p, miR-2320-3p, miR-2285e, miR-9788-3p, miR-4791, miR-484, miR-378b, miR-296-5p, miR-378c, miR-2284aa, miR-145a-3p, miR-4510, miR-378c, miR-2330-3p, miR-206-3p, miR-338-5p, miR-320e, miR-655-3p, miR-664a, miR-708-5p, miR-424-5p, miR-378a-3p, miR-532-5p, miR-182-5p, miR-3065-3p, miR-21-3p, miR-193b-3p, miR-6130, miR-877-5p, novel\_25, miR-204-3p, miR-21a-3p, miR-30f, miR-2312, novel\_99, miR-105-3p, miR-29b-1-5p, miR-2411, miR-196a-3p, miR-125b, miR-760-3p, miR-2284m, miR-21-3p, miR-299-3p, miR-485-3p, miR-15a-5p, miR-487a-3p, miR-383-5p, miR-532-3p, miR-188-3p, miR-1193, miR-140-3p, miR-124-3p, novel\_101, miR-495-3p, miR-24-3p, miR-211, miR-2428, miR-326-3p, novel\_27, miR-6402, miR-15a, miR-382-5p, miR-16a, novel\_1, miR-378b, miR-29a-3p, miR-146b-3p, miR-2387, miR-2285ab, miR-18a-3p, miR-378b, miR-450b-3p, miR-1291, miR-6395, miR-135b-5p, miR-195a-5p, miR-379-5p, miR-382, miR-539-3p, miR-296-3p, miR-224-5p, miR-455-5p, miR-330-3p, miR-197-5p, miR-1343-5p, miR-125a-5p, miR-665, miR-185-5p, miR-2285g, miR-1260b, miR-29b, miR-2284ab, miR-455-5p, miR-6128, miR-378c, miR-365a-5p, miR-5100, miR-29b-3p, miR-3969, miR-135a-5p, miR-331-3p, miR-28-5p, miR-486b-3p, miR-204-5p, miR-141-3p, miR-3965, miR-769, miR-2284n, miR-154b-5p, miR-324-5p, miR-199a-5p, miR-488-3p, miR-3154, miR-10a-3p, miR-671-5p, miR-485-5p, miR-7144-5p, novel\_48, miR-3529-3p, miR-181a-2-3p, miR-4286, miR-1, miR-2385-3p, miR-28b, miR-3065-3p, miR-199a-5p, miR-1260a, miR-513-5p, miR-378b, miR-

miR-30a-3p, miR-3064-5p, miR-181a-2-3p, miR-306b-3p, novel\_39, miR-2478, miR-92b-3p, miR-339a, miR-1260a, miR-92a-3p, novel\_127, miR-17-3p, miR-7641, novel\_79, miR-6517, miR-505-5p, miR-2411-5p, miR-3591-5p, miR-193a-5p, miR-1197-3p, miR-1260b, miR-331-3p, miR-135a-5p, miR-370-5p, miR-135a-1-3p, miR-28-5p, miR-486b-3p, miR-370-3p, miR-1271, miR-874-3p, miR-34c-5p, miR-25-3p, miR-488-3p, miR-7144-5p, miR-1814c, miR-671-5p, miR-1248, miR-32, miR-2331-5p, miR-503-5p, miR-146a, miR-339-5p, miR-340-3p, miR-149-5p, miR-194-3p, miR-2285g, miR-503-5p, miR-197-3p, miR-3071-5p, miR-7862, miR-30b-3p, miR-1260b, miR-1193, miR-17-3p, miR-342-3p, miR-449a, novel\_27, miR-2285m, miR-2428, miR-24-3p, miR-34c, miR-6402, miR-625-3p, miR-6123, miR-128-1-5p, miR-92a-3p, miR-206, novel\_68, miR-3074-5p, miR-6535, miR-146b-3p, miR-2404, novel\_69, miR-411b-3p, miR-670-3p, miR-34b, miR-1306, miR-18a-3p, miR-146b-5p, miR-135b-5p, miR-412-3p, miR-503-5p, miR-2411, miR-486-3p, miR-2432, miR-146a-5p, miR-185-3p, miR-196a-3p, miR-221-5p, miR-34b-5p, miR-21-3p, miR-30d-3p, miR-18a-3p, miR-140-3p, miR-5703, novel\_133, miR-2300b-3p, miR-193b-5p, miR-34a-5p, miR-378d, miR-3184-3p, miR-4510, miR-145a-3p, miR-3074-5p, miR-3184-5p, miR-206-3p, miR-324-3p, miR-30a-3p, miR-665, miR-320e, miR-15b-3p, miR-30e-3p, miR-874-5p, miR-129-5p, miR-708-5p, miR-664a, miR-17-3p, miR-3065-3p, miR-216b-3p, miR-370-5p, miR-545-3p, miR-504-5p, miR-32-5p, miR-2331-3p, miR-221-5p, miR-204-3p, miR-877-5p, miR-6130, miR-433-3p, miR-2285c, miR-625-5p, miR-543-3p, miR-1827, miR-339b, miR-744-3p, miR-8485, miR-2310, miR-505, miR-342, miR-1306-5p, miR-146b, miR-103a-2-5p, miR-3085-3p, miR-3955-3p, miR-1343-3p, novel\_78, miR-9788-3p, miR-2285e, miR-421, miR-147a, miR-30b-3p, miR-296-5p, miR-484, miR-301b-5p, miR-2426, miR-2447, miR-363-3p, miR-423-5p, miR-107-

miR-5010-3p, miR-10b-1, novel\_4, novel\_78, miR-2300a-5p, miR-2459, miR-1a-3p, miR-501-3p, miR-30b-3p, miR-758-3p, miR-125b-2-3p, miR-329-3p, miR-541, miR-2284aa, miR-362-3p, miR-23a-3p, miR-1388-3p, let-7a-5p, miR-494-3p, miR-106a-5p, miR-8485, miR-758-3p, miR-30c-1-3p, miR-362-3p, miR-106b-5p, miR-1306-5p, novel\_103, miR-5126, let-7e, miR-3955-3p, miR-487b-5p, miR-25-5p, miR-2285u, miR-211-5p, miR-4792, miR-24-1-5p, miR-20a-3p, let-7d-5p, miR-500-3p, miR-4443, miR-378g, miR-378j, miR-335-3p, miR-493-5p, miR-136-5p, miR-504, miR-4454, miR-3059-5p, miR-363-3p, miR-885-5p, miR-541-3p, miR-502-3p, miR-877-3p, novel\_111, miR-769-5p, miR-2285y, miR-2285n, miR-30b-5p, miR-2285t, miR-374a-3p, miR-2284q, miR-505-3p, miR-532-3p, miR-23b-3p, miR-7859, miR-200b, miR-222-5p, miR-98-3p, miR-217-5p, miR-1197-5p, miR-140-3p, miR-30c-5p, miR-2300b-3p, miR-362-3p, miR-1961, miR-195a-3p, miR-20a, miR-2887, miR-345-3p, miR-329a-5p, miR-2432, miR-421-5p, miR-216a-5p, miR-219b-5p, miR-125b, miR-30b, miR-26a-5p, miR-30d, let-7k, miR-98-5p, miR-216b-3p, miR-532-5p, miR-30c-1-3p, miR-32-5p, miR-504-5p, miR-22-3p, let-7i-5p, miR-27a-5p, miR-132-5p, miR-6130, miR-656-3p, miR-500a-3p, miR-30d-5p, miR-450a-1-3p, miR-625-5p, miR-30f, miR-154b-3p, let-7b, miR-3184-3p, miR-129-2-3p, miR-4510, let-7b-5p, miR-6134, miR-338-3p, miR-769-5p, miR-98-3p, miR-206-3p, miR-224-5p, miR-132-5p, miR-338-5p, let-7f, miR-500, miR-708-5p, miR-4492, miR-208b-5p, miR-129-5p, miR-130b-5p, miR-450b-3p, miR-664a, miR-6516-3p, miR-26b-3p, miR-3955-5p, miR-194-3p, miR-20b, miR-3431, miR-134-3p, miR-185-5p, let-7g-5p, miR-22-3p, miR-450c-3p, miR-3071-5p, miR-873a-5p, miR-2284x, miR-7862, miR-2284ab, miR-30b-3p, miR-130b-5p, miR-296-3p, miR-32, miR-105-5p, novel\_51, miR-224-5p, miR-296-3p, miR-125a-5p, miR-124-5p, miR-26b-5p, miR-329-5p, miR-144-3p, miR-

miR-7857-3p, miR-20a-3p, miR-7977, miR-877-3p, novel\_94, miR-361-3p, miR-199b-5p, miR-362-5p, novel\_60, miR-4726-5p, miR-335, miR-2285t, miR-371a-5p, miR-769-5p, miR-2320-3p, miR-9788-3p, miR-500-5p, novel\_4, miR-2300a-5p, miR-409b, miR-2426, miR-101a-5p, miR-2284aa, miR-16-2-3p, miR-4791, miR-412-3p, miR-30b-3p, miR-3962, miR-193a, miR-758-3p, miR-33a-5p, novel\_103, miR-1306-5p, miR-326, miR-132-5p, miR-6130, miR-204-3p, miR-155-5p, miR-140-5p, miR-221-5p, miR-660-5p, miR-496-3p, miR-3065-3p, miR-18a-5p, novel\_99, miR-539-5p, miR-4510, miR-2330-3p, miR-450b-3p, miR-664a, miR-6516-3p, miR-155-5p, miR-17-3p, miR-708-5p, miR-320e, miR-148b-3p, novel\_83, miR-151-5p, miR-532-3p, miR-3600, miR-505-3p, miR-485-3p, miR-378d, novel\_133, miR-5703, miR-1197-5p, miR-188-3p, miR-130a-5p, miR-125b-2-3p, miR-216c-5p, miR-2887, miR-2284m, miR-466i-5p, miR-221-5p, miR-34b-5p, miR-299-3p, miR-196a-3p, miR-146b-3p, miR-29a-3p, miR-34b, miR-135b-5p, miR-505-3p, miR-18b, miR-18a-3p, miR-24-3p, miR-326-3p, novel\_27, miR-449a, miR-135a-2-3p, novel\_101, miR-17-3p, miR-133a-5p, miR-34c, miR-432-5p, miR-2284d, miR-185-5p, miR-133b-5p, miR-138, miR-30b-3p, miR-29b, miR-2284ab, miR-380-3p, miR-1260b, miR-7862, miR-455-5p, miR-653, miR-3071-5p, miR-145a-5p, miR-374b-3p, miR-539-3p, miR-660, miR-466f-3p, miR-330-3p, miR-455-5p, miR-34c-5p, miR-769, miR-324-5p, miR-199a-5p, miR-2284n, miR-23a-5p, miR-485-5p, miR-671-5p, miR-381-3p, miR-503-3p, miR-18a, miR-362-5p, miR-3154, miR-500b-5p, miR-365a-5p, miR-6128, miR-138-5p, miR-486b-3p, miR-28-5p, miR-29b-3p, miR-410-5p, miR-135a-1-3p, miR-5100, miR-331-3p, miR-3969, miR-409-3p, miR-135a-5p, miR-545-5p, miR-196a-2-3p, miR-300, miR-496, miR-134, miR-29d-3p, miR-2478, miR-28b, miR-3065-3p, miR-199a-5p, miR-30a-3p, miR-2385-3p, miR-181a-2-3p, miR-450a-2-3p, miR-17-3p, miR-2898, miR-5703, miR-150-5p, miR-6535, miR-545-5p, miR-365a-3p, miR-7977, miR-125a, miR-30d-3p, miR-874-3p, miR-125a-5p, miR-125b, miR-324-3p, miR-125b-5p, miR-30a-3p, miR-4286, miR-30a-3p, miR-1197-3p, miR-133a-3p, miR-486b-3p, miR-4492, miR-125b-5p, miR-544-3p, miR-615-5p, miR-125a, miR-141-3p, miR-2285aa, miR-548o-3p, miR-485-5p, novel\_99, miR-1827, let-7g-3p, miR-133b-3p, miR-320a, novel\_39, miR-486-3p, miR-2432, miR-421-5p, miR-181a-2-3p, miR-2285w, miR-200a-3p, miR-1277-5p, miR-320d, miR-185-3p, miR-125b, miR-210-5p, miR-2284h-5p, miR-9-5p, miR-7859, let-7a-2-3p, miR-128-3p, miR-133a-3p, miR-4429, miR-493-3p, miR-7705, miR-2428, novel\_27, miR-24-3p, miR-452-5p, miR-181d-5p, miR-9-5p, miR-2284q, miR-421-5p, miR-107-5p, miR-1973, miR-218-5p, miR-320c, miR-6535, miR-411b-3p, miR-489, miR-374c-3p, miR-378g, miR-3596, miR-216a-3p, miR-378b, let-7a-2-3p, miR-432-3p, miR-103a-2-5p, miR-125a-5p, miR-378a-5p, miR-505, miR-320b, miR-544b, miR-194-3p, miR-216a-3p, miR-134-3p, miR-26b-3p, miR-3120-5p, miR-544a, miR-1388-5p, miR-374b-3p, miR-143-5p, miR-296-5p

miR-409b, miR-151a-3p, miR-27a-3p, miR-45b-3p, miR-221-3p, miR-2285e, miR-2459, miR-541, miR-101c, miR-2284aa, miR-3120-5p, miR-101b-3p, miR-652-5p, miR-2284b, miR-8485, novel\_115, miR-431-5p, miR-1306-5p, miR-2957, miR-146b, miR-103a-2-5p, miR-139-5p, miR-2284g, miR-20a-3p, miR-126b-5p, miR-3596, miR-144-5p, miR-27a-3p, miR-221, miR-129b-5p, miR-493-5p, miR-541-3p, miR-2285f, miR-2284j, miR-101-3p, miR-769-5p, miR-107-5p, miR-3958-3p, miR-2284q, miR-7859, miR-383-5p, miR-2300b-3p, miR-188-3p, miR-1434-5p, miR-5703, miR-19b-3p, miR-142-3p, miR-33b-3p, miR-16-1-3p, miR-2284u, miR-216c-5p, miR-369-3p, miR-146a-5p, miR-380-3p, miR-219b-5p, miR-345-3p, miR-2284m, miR-466i-5p, miR-3653-3p, miR-1277-5p, novel\_107, miR-139-5p, novel\_32, miR-2285c, miR-450a-1-3p, miR-655, miR-2312, miR-345-5p, miR-186-5p, miR-590-3p, miR-539-5p, miR-145a-3p, miR-769-5p, miR-2285j, miR-222-3p, miR-151-3p, miR-320e, miR-655-3p, miR-664a, miR-708-5p, miR-103a-3p, miR-26b-3p, miR-412-5p, miR-2284d, miR-2285g, miR-6238, miR-103, miR-653, miR-223-3p, miR-1434-3p, miR-3071-5p, miR-138, miR-380-3p, miR-2284ab, miR-16-1-3p, miR-27b-3p, miR-493-5p, miR-382, miR-2284l, miR-296-3p, miR-345-5p, miR-146a, miR-296-3p, miR-2411-3p, miR-124-5p, miR-452-5p, miR-466f-3p, miR-655-5p, miR-3120-3p, miR-670-3p, miR-374c-3p, miR-2285ab, miR-1306, miR-216a-3p, miR-107, miR-19a-3p, miR-2284e, miR-146b-5p, miR-2319a, miR-135a-2-3p, miR-495-3p, miR-2285x, miR-374c-5p, miR-4324, miR-28c, miR-2284o, miR-22-5p, miR-502b, miR-222, miR-431, miR-2284z, novel\_121, miR-214-5p, miR-345-3p, miR-3578, miR-300, miR-128-3p, miR-2284f, miR-28b, miR-1957a, miR-2284y, miR-2285b, miR-192-3p, miR-2284a, miR-2285af, miR-181c-3p, miR-107, miR-300-3p, miR-374c-3p, miR-769, miR-223-5p, miR-2284n, miR-381-3p, miR-345-5p, miR-485-5p, miR-2284v, miR-144-3p, miR-2426, miR-2898, miR-1248, miR-200a-3p, miR-193b-5p, miR-1197-5p, miR-2284l, miR-141-3p, miR-212-5p, miR-6128

PI15 ENSOARGO(peptidas) miR-1983, miR-412-3p, miR-125b-2-3p, novel\_133, miR-2366, miR-2432, miR-29a-5p, miR-1343-3p

CHCHD3 ENSOARGO(coiled-c)

ZNF318 ENSOARGO(zinc fin)

miR-145a-3p, miR-3074-5p, miR-3184-3p, miR-129-2-3p, miR-4510, miR-378c, let-7b, miR-214, miR-2330-3p, novel\_44, miR-338-3p, let-7b-5p, miR-30e-3p, let-7f, miR-3604, miR-324-3p, miR-30a-3p, miR-664a, miR-130b-5p, miR-500, miR-660-5p, miR-30c-1-3p, miR-504-5p, miR-2331-3p, miR-32-5p, miR-545-3p, miR-378a-3p, miR-139-5p, miR-6130, miR-582-5p, miR-192-5p, miR-27a-5p, let-7i-5p, miR-204-3p, novel\_25, miR-500a-3p, miR-129b-3p, miR-345-5p, miR-133b-3p, novel\_99, miR-582-5p, miR-2285w, miR-329a-5p, miR-130a-5p, miR-181b-1-3p, miR-210-5p, miR-542-5p, miR-422a, miR-324-3p, miR-216a-5p, miR-98-5p, let-7k, miR-299-3p, miR-2484, miR-21-3p, miR-34b-5p, miR-18a-3p, miR-30d-3p, miR-3600, miR-2284h-5p, miR-215-5p, miR-2366, miR-1961, miR-378i, miR-378a-3p, miR-5703, miR-1193, miR-2904, miR-33b-3p, miR-34a-5p, miR-133a-3p, miR-885-5p, miR-3956-3p, novel\_60, miR-3059-5p, miR-2447, miR-452-5p, miR-3064-5p, miR-380-5p, miR-148b-5p, miR-92b-3p, miR-200a, let-7i-1-3p, miR-190b-5p, miR-362-5p, miR-1285-5p, miR-2440, miR-371a-5p, miR-7134-3p, miR-20a-3p, miR-139-5p, miR-3064-5p, miR-499b-5p, miR-378e, let-7d-5p, miR-504, miR-136-5p, miR-299b-5p, miR-544-5p, miR-877-3p, miR-2330-5p, let-7a-5p, miR-1388-3p, miR-33a-5p, miR-652-5p, miR-30c-1-3p, miR-378d, miR-4532, miR-193a, miR-326, miR-431-5p, miR-323b-3p, miR-3955-3p, miR-3085-3p, miR-491-5p, miR-542-5p, let-7e, miR-214-3p, miR-330-3p, miR-2300a-5p, miR-181b-2-3p, miR-539-5p, miR-425-3p, miR-455-3p, miR-500-5p, miR-484, miR-378b, miR-323b, miR-2426, miR-378c, miR-1388-5p, miR-2284aa, miR-1839-5p, miR-101c, miR-133a-3p, miR-1260b, miR-500b-5p, miR-378c, miR-365a-5p, miR-409-3p, miR-331-3p, miR-100-3p, miR-141-3p, miR-215-5p, miR-370-3p, miR-25-3p, miR-34c-5p, miR-154b-5p, miR-2448-3p, miR-488-3p, miR-362-5p, miR-3154, miR-345-5p, miR-671-5p, miR-3529-3p, miR-4286, miR-181a-2-3p, miR-2403, miR-30a-3p, miR-3064-5p, miR-380-5p, miR-148b-5p, miR-92b-3p, miR-200a, let-

miR-378a-5p, miR-377-3p, miR-582, miR-7-5p, novel\_51, miR-365b-5p, miR-2284l, miR-2285r, miR-628-5p, let-7f-2-3p, let-7f-2-3p, miR-668-3p, miR-7b-5p, miR-432, miR-708-3p, novel\_23, miR-3431, miR-3535, miR-31-5p, miR-339-5p, miR-2285m, miR-301b-3p, miR-758-5p, miR-2319a, miR-376b-5p, miR-1306, miR-299b-3p, miR-320c, miR-216b-3p, novel\_68, miR-28-3p, miR-200a-3p, novel\_127, novel\_96, miR-219-3p, miR-3071-3p, miR-29a-5p, miR-2284y, miR-200a, miR-1290, miR-3591-5p, miR-23b-5p, miR-2284z, miR-429-3p, miR-6517, miR-299a-3p, novel\_79, miR-592, miR-2433, miR-1260b, miR-181c-3p, miR-28a-3p, miR-193a-5p, miR-2318, miR-345-5p, miR-1248, miR-301, miR-93-5p, miR-331-5p, miR-3068-3p, miR-503-3p, miR-2355-5p, miR-130b-3p, miR-491-5p, miR-199a-3p, miR-106b-5p, miR-1b-5p, miR-2284b, miR-101c, miR-758-3p, miR-147a, miR-142-5p, miR-425-3p, miR-2459, miR-1185-3p, miR-455-3p, novel\_78, miR-IRAK1BP1 ENSOARGO(interleu.548w, miR-145b, miR-3968, miR-490-5p, miR-3964, miR-101-3p, miR-2440, novel\_82, miR-877-3p, miR-3956-3p, miR-885-5p, miR-181a-3p, miR-140-5p, miR-381-3p, miR-2483-3p, miR-1185-2-3p, miR-203-3p, miR-2284g, miR-4792, miR-139-5p, miR-210-5p, miR-500a-5p, miR-380-3p, miR-2424, miR-503-5p, miR-345-3p, miR-142-3p, miR-184-3p, miR-361-5p, miR-148a-5p, miR-2284u, miR-218-1-3p, miR-664-5p, miR-98-3p, miR-7859, miR-328-3p, miR-106a, miR-18a-3p, miR-380-5p, novel\_74, miR-669a-3p, miR-130b-5p, miR-454-3p, miR-129-5p, miR-2285j, let-7b-3p, miR-219b-3p, miR-98-3p, miR-346, miR-6525, miR-142a-5p, miR-769-5p, miR-339b, miR-345-5p, miR-186-5p, miR-433-3p, miR-129b-3p, miR-377-3p, miR-301a-3p, miR-216b-3p, miR-466f-3p, miR-660, miR-503-5p, miR-654-3p, miR-345-5p, miR-130b-5p, miR-1260b, miR-380-3p, miR-30b-3p, miR-2284ab, miR-3071-5p, miR-145a-5p, miR-503-5p, miR-432-5p, miR-130a-3p, miR-92-5p, miR-656-5p, miR-20a-5p, miR-24-3p, miR-17-5p, miR-20a, miR-1271-3p, miR-192-3p, miR-125a-3p, miR-200c, miR-2285p, miR-30b, miR-376b-3p, miR-30f, miR-500a-5p, miR-200c-3p, miR-106a, miR-30d, miR-106a, miR-200b, miR-340-5p, miR-222-5p, novel\_121, miR-214-5p, miR-199a-3p, novel\_133, miR-30c-5p, miR-30a-5p, miR-30c, miR-200b-3p, miR-590-3p, miR-3074-2-3p, miR-374a-3p, miR-500b-5p, miR-93, miR-370-5p, miR-135a-1-3p, miR-374b-3p, miR-487a-5p, miR-190a-5p, miR-532-5p, miR-296-3p, miR-552-3p, miR-370-5p, miR-323-5p, miR-2284s, novel\_25, miR-30e-5p, miR-17-5p, miR-30d-5p, miR-362-5p, miR-93-5p, miR-6240, miR-106a-5p, miR-1388-3p, miR-2285r, miR-758-3p, miR-199a-3p, miR-17-5p, novel\_51, miR-106b-5p, miR-330-3p, miR-190a, miR-409b, miR-1343-3p, miR-2300a-5p, miR-500-5p, miR-1285, miR-1434-3p, miR-2284r, miR-758-3p, miR-1193, miR-362-5p, miR-20a-5p, miR-30b-5p, miR-502-5p, miR-382-5p, miR-499a-5p, miR-374a-3p, miR-2483-3p, miR-3082-5p, miR-670-3p, miR-323a-5p, miR-150-5p, miR-877-3p

MLIP ENSOARGO(muscular

miR-296-3p, miR-552-3p, miR-548o-3p, miR-15b-5p, miR-216b-5p, miR-376e-3p, miR-500a-3p, miR-129b-3p, miR-450a-1-3p, miR-1827, miR-345-5p, miR-339b, miR-3958-5p, miR-3074-5p, miR-129-2-3p, miR-3184-5p, miR-346, miR-30a-3p, miR-30e-3p, miR-130b-5p, miR-129-5p, miR-500, miR-30d-3p, miR-380-5p, miR-378a-3p, miR-2366, miR-378i, miR-148a-5p, miR-2284u, miR-361-5p, miR-16-1-3p, miR-133a-3p, miR-345-3p, miR-329a-5p, miR-2424, miR-486-3p, miR-181b-1-3p, miR-422a, miR-345-3p, miR-92a-1-5p, miR-324-3p, novel\_17, miR-26a-5p, miR-211-5p, miR-139-5p, miR-2284g, miR-500-3p, miR-378g, miR-221, miR-493-5p, miR-376a-3p, miR-96-5p, miR-9-5p, miR-2284j, let-7i-3p, miR-6527, miR-2447, miR-423-5p, miR-361-3p, miR-490-5p, miR-3968, miR-181b-2-3p, miR-421, miR-455-3p, miR-148b-5p, miR-376b-3p, miR-1298-3p, miR-153, miR-758-3p, miR-501-3p, miR-541, miR-1839-5p, miR-101c, miR-1388-5p, miR-2310, miR-378d, miR-16b, miR-29b-1-5p, miR-103a-2-5p, miR-153-3p, miR-487b-5p, miR-2285aa, miR-2355-5p, miR-503-3p, miR-376c-3p, miR-331-5p, miR-137-3p, miR-2318, miR-329b, miR-345-5p, miR-876-3p, miR-16-5p, miR-28a-3p, miR-100-3p, novel\_63, miR-2284k, miR-592, novel\_79, miR-1224-5p, miR-2285ad, miR-129-1-3p, novel\_121, miR-450a-1-3p, miR-9-5p, miR-505-5p, miR-322-5p, miR-2427, miR-1290, miR-3591-5p, miR-155-5p, miR-3956-5p, miR-2285b, miR-148b-5p, miR-450b-5p, miR-125a-3p, miR-205-5p, miR-28-3p, miR-3120-3p, miR-26b-5p, miR-329-5p, miR-3074-5p, miR-181b-3p, miR-677, novel\_69, miR-216a-3p, miR-150-5p, miR-378f, miR-410-5p, miR-758-5p, miR-425-5p, miR-4324, miR-339-5p, miR-103a-3p, miR-31-5p, miR-3955-5p, miR-194-3p, miR-411-5p, miR-134-3p, miR-3431, novel\_23, miR-450c-3p, miR-197-3p, miR-22-3p, miR-7b-5p, miR-708-3p, miR-2284x, miR-188-5p, miR-497-5p, miR-16-1-3p, miR-16b, miR-628-5p, miR-193-5p, miR-380-5p, let-7a-2-1, miR-493-3p, miR-378i, miR-378a-3p, miR-330-5p, miR-1193, miR-5703, miR-378h, miR-3960, miR-6517, miR-30b-3p, miR-221-5p, miR-543-5p, miR-210-5p, miR-3071-3p, miR-30c-2-3p, miR-422a, miR-185-3p, miR-122-3p, novel\_39, miR-3064-5p, miR-1827, miR-3154, miR-6130, miR-204-3p, miR-324-5p, miR-140-5p, miR-221-5p, miR-2331-3p, miR-378a-3p, miR-30c-1-3p, miR-4492, miR-708-5p, miR-28-5p, miR-331-3p, miR-320e, miR-665, miR-1197-3p, miR-378c, miR-378c, novel\_42, miR-3074-5p, miR-4510, miR-378c, miR-21-5p, miR-1388-5p, miR-219a-1-3p, miR-450b-5p, miR-4508, miR-744-5p, miR-378b, miR-296-5p, miR-2284r, miR-541, miR-758-3p, miR-3955-5p, novel\_78, miR-3085-3p, miR-326, miR-1306-5p, miR-378d, miR-30c-1-3p, miR-432-3p, miR-432-3p, miR-758-3p, miR-1291, miR-450b-3p, miR-412-3p, miR-1983, miR-378f, miR-361-3p, miR-1306, miR-21c, miR-378e, miR-652-3p, miR-4443, miR-3064-5p, miR-3074-5p, miR-128-1-5p, miR-4726-5p, miR-326-3p, miR-2428, miR-2447, miR-541-3p, novel\_101

LECT1 ENSOARGO( leukocyt

ACOT8 ENSOARGO( acyl-CoA



miR-432, miR-708-3p, miR-145a-5p, novel\_23, miR-374b-3p, miR-30b-3p, miR-16b, miR-2284ab, miR-16-1-3p, miR-497-5p, miR-2284x, miR-31-5p, miR-665, miR-432-5p, miR-2284d, miR-3431, miR-194-3p, miR-411-5p, miR-146a, miR-105-5p, miR-2483-5p, miR-654-3p, miR-2387, miR-1306, miR-18a-3p, miR-410-5p, miR-412-3p, miR-146b-5p, miR-195a-5p, miR-329-5p, miR-411b-3p, miR-299b-3p, miR-15a, miR-16a, miR-33a-3p, miR-379-3p, novel\_1, miR-147-5p, novel\_120, miR-335-5p, miR-1839-3p, miR-199b-5p, miR-2284w, miR-1290, miR-23b-5p, miR-30a-5p, miR-411-3p, miR-105-2, miR-200b-3p, miR-30c, miR-299a-3p, miR-429-3p, miR-7641, miR-412, miR-322-5p, miR-6516-5p, miR-545-5p, novel\_121, miR-200c, miR-30c-2-3p, miR-30f, miR-200c-3p, miR-1a-2-5p, miR-181b-5p, miR-200a-3p, miR-543-5p, novel\_127, miR-450b-5p, miR-199a-5p, miR-30e-5p, miR-329b, miR-141-3p, miR-331-5p, miR-199a-5p, miR-376c-3p, miR-2284n, miR-2284k, miR-2332, miR-6740-5p, novel\_9, miR-28-5p, miR-374b-3p, miR-592, miR-1306-5p, miR-16-5p, miR-6128, miR-144-5p, miR-374a-3p, miR-2284r, miR-484, miR-412-3p, miR-30b-3p, miR-1388-5p, miR-101c, miR-105-1, miR-548w, miR-539-5p, miR-199a-3p, miR-1306-5p, miR-16b, miR-199b-5p, miR-146b, miR-124a, miR-1388-3p, miR-1839-3p, miR-424-5p, miR-494-3p, miR-30c-1-3p, miR-8485, miR-361-3p, miR-199b-5p, miR-381-3p, miR-129b-5p, miR-1983, miR-499b-5p, miR-3596, miR-7857-3p, miR-499a-3p, miR-144-5p, miR-30b-5p, novel\_82, miR-2285y, miR-4726-5p, miR-499a-5p, miR-335, miR-3964, miR-374a-3p, miR-2447, novel\_60, miR-3956-3p, miR-2284j, miR-181d-5p, miR-30c-5p, miR-2366, miR-124-3p, novel\_73, miR-16-1-3p, miR-361-5p, miR-18a-3p, miR-200b, miR-15a-5p, miR-199a-3p, miR-30b, miR-2285p, miR-216a-5p, miR-500a-5p, miR-2284m, miR-30d, miR-1277-5p, miR-2484, miR-299-3p, miR-329a-5p, miR-376a-5p, miR-376c-3p, miR-

miR-362-3p, miR-329-3p, miR-455-3p, miR-539-5p, miR-330-3p, miR-199b-3p, miR-103a-2-5p, miR-491-5p, miR-29b-1-5p, miR-2310, miR-8485, miR-378d, miR-101b-3p, miR-504, miR-299b-5p, miR-140-5p, miR-4443, miR-211-5p, miR-7689-3p, miR-139-5p, miR-2440, miR-7705, novel\_111, miR-34a-5p, miR-361-5p, miR-133a-3p, miR-16-1-3p, miR-184-3p, miR-378a-3p, miR-378i, miR-95-3p, miR-30d-3p, miR-380-5p, miR-2484, miR-122-3p, miR-92a-1-5p, miR-422a, miR-219b-5p, miR-377-5p, miR-376a-5p, miR-186-5p, miR-1827, miR-625-5p, miR-339b, miR-433-3p, miR-151b, miR-377-3p, miR-2284s, miR-552-3p, miR-216b-3p, miR-504-5p, miR-129-5p, miR-874-5p, miR-30a-3p, miR-30e-3p, novel\_44, miR-6525, miR-665-5p, miR-3184-3p, miR-129-2-3p, miR-2284x, miR-27b-3p, miR-16-1-3p, miR-542-3p, miR-2113, miR-19b-2-5p, novel\_116, miR-3431, miR-3535, miR-339-5p, miR-340-3p, miR-378a-5p, miR-377-3p, let-7a-2-3p, let-7j, miR-432-3p, miR-432-3p, miR-6240, miR-378f, miR-216a-3p, miR-3591-3p, miR-148a-3p, miR-6535, miR-374c-3p, miR-411b-3p, miR-3120-3p, miR-216b-3p, miR-28c, miR-576-3p, miR-4324, miR-2284w, miR-758-5p, miR-335-5p, miR-330-5p, miR-1290, miR-486-5p, miR-129-1-3p, miR-134-5p, miR-758-5p, miR-505-5p, novel\_79, miR-412, miR-429-3p, miR-152-3p, novel\_96, novel\_39, miR-148b-5p, miR-3064-5p, miR-329a, miR-876-3p, miR-125a, miR-3068-3p, miR-574-5p, miR-134-5p, miR-126b-3p, miR-125b-5p, miR-1260b, miR-193a-5p, miR-299a-5p, miR-450b-5p, miR-378c, miR-125b-2-3p, miR-412-3p, miR-4791, miR-378b, miR-296-5p, miR-216a-3p, miR-9788-3p, miR-27a-3p, novel\_4, miR-409b, miR-2300a-5p, miR-3955-3p, miR-3085-3p, miR-362-3p, miR-326, novel\_103, miR-376b, miR-652-5p, miR-33a-5p, miR-877-3p, novel\_94, miR-129b-5p, miR-27a-3p, miR-378e, miR-3064-5p, miR-335, miR-107-5p, miR-1197-5p, miR-1193, miR-140-3p, miR-5703, miR-2904, miR-362-3p, miR-2408, miR-215-5p, miR-2300b-3p, novel\_133, novel\_83, miR-671-

CFL2 ENSOARGO( cofilin miR-429-3p, miR-7641, miR-23b-3p, miR-23c, miR-222-5p, miR-199a-3p, novel\_121, miR-30c-5p, miR-3591-5p, miR-3578, miR-140-3p, miR-30a-5p, miR-1434-5p, miR-5703, novel\_73, miR-19b-3p, miR-30c, miR-16-1-3p, miR-183-5p, miR-20a, miR-450b-5p, miR-130a-5p, miR-142a-3p, miR-2284y, miR-199a-5p, miR-146a-5p, miR-376c-5p, miR-2284a, miR-205-5p, miR-30b, miR-125a-3p, miR-200c, miR-30f, miR-200c-3p, miR-30d, novel\_96, miR-200a-3p, miR-545-3p, miR-503-3p, miR-2285aa, miR-141-3p, miR-300-3p, miR-301a-3p, miR-199a-5p, miR-30e-5p, miR-21a-3p, miR-3613-5p, miR-93-5p, miR-17-5p, miR-23b, miR-30d-5p, miR-2318, miR-30f, miR-20b-5p, miR-625-5p, miR-539-5p, miR-2330-3p, miR-425-5p, miR-93, miR-551b-3p, miR-19b-1-5p, miR-409-3p, miR-664a-5p, novel\_74, miR-6516-3p, miR-451a, miR-454-3p, miR-133b-5p, miR-130a-3p, miR-145b, miR-153, miR-142-3p, miR-194-3p, miR-2459, miR-1185-3p, miR-20b, miR-19b-2-5p, miR-1434-3p, miR-145a-5p, novel\_23, miR-194-5p, miR-16-1-3p, miR-382-3p, miR-382, miR-23a-3p, let-7f-2-3p, let-7f-2-3p, miR-3187-3p, miR-342, miR-199a-3p, miR-146a, miR-505, miR-194a, miR-106b-5p, miR-106a-5p, miR-17-5p, miR-491-5p, miR-130b-3p, miR-153-3p, miR-146b, miR-199b-5p, miR-216b-3p, miR-3120-3p, miR-411b-3p, miR-1185-2-3p, miR-199b-5p, miR-2387, miR-3065-5p, miR-378b, miR-21c, miR-299b-5p, miR-19a-3p, miR-335-3p, miR-146b-5p, miR-9-3p, miR-342-3p, miR-212-3p, miR-495-3p, miR-194b-5p, miR-1285-5p, miR-7705, miR-199b-5p, miR-301b-3p, miR-3613, miR-30b-5p, miR-20a-5p

miR-320b, miR-323b-3p, miR-130b-3p, miR-487b-5p, miR-1468, miR-199b-5p, miR-146b, miR-2310, miR-3962, miR-1a-3p, miR-501-3p, miR-450b-5p, miR-2284aa, miR-199b-3p, miR-548w, miR-1343-3p, miR-222-5p, miR-181b-2-3p, miR-27a-3p, miR-539-5p, miR-216a-3p, miR-101-3p, miR-2440, miR-2285n, miR-371a-5p, miR-499a-5p, miR-154-3p, miR-3956-3p, miR-885-5p, novel\_60, miR-2447, miR-190b-5p, novel\_111, miR-502-3p, miR-199b-5p, miR-493-5p, miR-499b-5p, miR-489, miR-27a-3p, miR-500-3p, miR-92a-1-5p, miR-466i-5p, miR-320d, miR-2484, miR-1277-5p, miR-34b-5p, miR-487a, miR-329a-5p, miR-369-3p, miR-181b-1-3p, miR-2432, miR-2424, miR-146a-5p, miR-215-5p, miR-5703, miR-4429, miR-493-3p, miR-34a-5p, miR-548e-3p, miR-210-3p, miR-487a-3p, miR-7859, miR-2285j, miR-324-3p, miR-487b-5p, miR-454-3p, miR-3184-3p, miR-206-3p, miR-6525, miR-21a-3p, miR-154b-3p, let-7g-3p, miR-186-5p, miR-660-5p, miR-296-3p, miR-154a-3p, miR-21-3p, miR-193b-3p, miR-301a-3p, miR-204-3p, miR-146a, miR-455-5p, miR-196b-5p, miR-193a-3p, miR-660, miR-493-5p, miR-668-3p, miR-2285r, miR-1434-3p, miR-542-3p, miR-3071-5p, miR-197-3p, miR-219a-1-3p, miR-455-5p, miR-27b-3p, miR-130a-3p, miR-33a-3p, miR-382-5p, miR-34c, miR-206, miR-199c, miR-495-3p, miR-2285x, miR-193b-3p, miR-301b-3p, miR-199b-5p, miR-2284w, miR-374c-5p, miR-449a, miR-3591-3p, miR-216a-3p, miR-450b-3p, miR-376a-2-5p, miR-146b-5p, miR-329-5p, miR-3120-3p, miR-374c-3p, miR-411b-3p, miR-34b, miR-181b-3p, miR-320c, miR-30f, miR-543-5p, miR-1, miR-2285b, miR-200a, miR-199a-5p, miR-196a-5p, miR-501-3p, miR-128-3p, miR-2284z, miR-135a-1-3p, miR-2332, novel\_63, miR-410-5p, miR-3969, miR-410-3p, miR-6128, miR-3607-3p, miR-145-3p, miR-320a, miR-2318, miR-10b-3p, miR-1814c, novel\_48, miR-3068-3p, miR-487a-3p, miR-215-5p, miR-2285aa, miR-331-5p, miR-34c-5p, miR-199a-5p

miR-582-3p, miR-134, miR-23b-5p, miR-302a-5p, miR-483-3p, miR-758-5p, miR-378h, miR-134-5p, miR-7641, miR-17-3p, miR-28-3p, miR-376b-3p, miR-664-3p, miR-219-3p, miR-200a, miR-29a-5p, miR-3956-5p, miR-30a-3p, miR-3064-5p, miR-181a-2-3p, miR-4286, miR-10b-3p, miR-485-5p, miR-488-3p, miR-137-3p, miR-200a-5p, miR-154b-5p, miR-487a-3p, miR-542-5p, miR-615-5p, miR-138-5p, miR-134-5p, miR-374b-3p, miR-6740-5p, miR-409-3p, miR-374a-3p, miR-378c, miR-28a-3p, miR-3607-3p, miR-138, miR-30b-3p, miR-653, miR-194-3p, novel\_116, miR-149-5p, miR-544b, miR-483-3p, miR-197-5p, miR-654-3p, let-7j, miR-130b-5p, miR-493-5p, miR-2483-5p, let-7f-2-3p, let-7f-2-3p, miR-7975, miR-2319a, miR-6395, miR-378f, miR-378b, miR-323a-5p, miR-669, miR-378b, miR-320b, miR-655-5p, miR-7-1-3p, miR-421-5p, miR-502b, miR-382-5p, miR-2428, miR-542-5p, miR-17-3p, miR-142-3p, miR-378d, novel\_133, miR-378i, miR-193b-5p, miR-378a-3p, miR-7859, miR-222-5p, miR-328-3p, miR-548e-3p, miR-1b-3p, miR-30d-3p, miR-202-5p, miR-542-5p, miR-92a-1-5p, miR-185-3p, miR-422a, miR-421-5p, miR-29b-1-5p, miR-142a-3p, miR-216c-5p, miR-487a, miR-345-3p, miR-154b-3p, novel\_99, miR-582-5p, miR-3613-5p, miR-129b-3p, miR-433-3p, miR-582-5p, miR-544-3p, miR-323-5p, miR-378a-3p, miR-548o-3p, miR-216b-3p, miR-154a-3p, miR-552-3p, miR-296-3p, miR-17-3p, miR-487b-5p, miR-129-5p, miR-874-5p, miR-130b-5p, miR-15b-3p, miR-30e-3p, miR-30a-3p, miR-219b-3p, miR-338-5p, miR-665, miR-320e, miR-378c, miR-145a-3p, miR-378c, miR-544a, miR-2426, miR-101c, miR-378b, miR-758-3p, miR-30b-3p, miR-142-3p, miR-2459, miR-1185-3p, miR-548w, novel\_78, miR-222-5p, miR-3085-3p, miR-542-5p, miR-29b-1-5p, miR-378d, miR-758-3p, let-7c-3p, miR-744-3p, miR-493-5p, novel\_94, miR-3596, miR-378e, miR-1185-2-3p, miR-3064-5p, miR-664b, miR-3968, miR-3958-3p, miR-374a-3p, miR-154-3p, miR-2285p, miR-877-3p, miR-

miR-362-5p, miR-3154, miR-301, miR-30e-5p, miR-329b, miR-876-3p, miR-141-3p, miR-370-3p, miR-154b-5p, miR-199a-5p, miR-223-5p, miR-2284k, miR-3607-3p, miR-6128, miR-365a-5p, miR-500b-5p, miR-323-3p, miR-23b-5p, miR-30a-5p, miR-2427, miR-218-2-3p, miR-3578, miR-196a-5p, miR-411-3p, miR-450a-1-3p, miR-6516-5p, miR-2285af, miR-200a-3p, miR-6536, miR-1, miR-495-5p, miR-2284a, miR-199a-5p, miR-376c-5p, miR-2284y, miR-323a-5p, miR-146b-3p, miR-502b, miR-656-5p, miR-206, miR-495-3p, miR-335-5p, miR-199b-5p, miR-2284w, miR-323c, miR-145a-5p, miR-374b-3p, miR-450c-3p, miR-708-3p, miR-2284x, miR-380-3p, miR-26b-3p, miR-31-5p, miR-3431, miR-365b-5p, miR-224-5p, miR-452-5p, miR-196b-5p, miR-101-5p, miR-30d-5p, miR-450a-1-3p, miR-1827, miR-30f, miR-139-5p, miR-216b-5p, miR-323-5p, miR-6516, miR-324-3p, miR-2285j, miR-487a-5p, miR-450b-3p, miR-539-5p, miR-433-5p, miR-6134, miR-122-5p, miR-224-5p, miR-206-3p, miR-188-3p, miR-124-3p, miR-30c-5p, miR-142-3p, miR-1247-5p, miR-210-5p, novel\_17, miR-30b, miR-2484, miR-30d, miR-466i-5p, miR-2284m, miR-195a-3p, miR-143-3p, miR-380-3p, miR-2424, miR-125b-2-3p, miR-199b-5p, miR-2285u, miR-2319b, miR-452-3p, miR-4792, miR-139-5p, miR-4443, miR-203-3p, miR-107-5p, miR-2440, miR-30b-5p, miR-2284q, miR-335, miR-499a-5p, miR-628-3p, miR-4726-5p, let-7i-3p, miR-2284j, miR-541-3p, miR-885-5p, miR-362-5p, miR-3962, miR-1a-3p, miR-541, miR-484, miR-1839-5p, miR-2426, miR-450b-5p, miR-145b, miR-5010-3p, miR-548w, miR-2459, miR-9788-3p, miR-500-5p, miR-147a, miR-103a-2-5p, miR-199b-5p, miR-3955-3p, miR-376b, miR-124a

let-7c-3p, miR-33a-5p, miR-124a, miR-424-5p, miR-106a-5p, miR-8485, miR-1b-5p, miR-758-3p, miR-362-3p, miR-106b-5p, miR-16b, miR-199b-5p, miR-145b, miR-105-1, miR-548w, miR-2285e, miR-758-3p, miR-329-3p, miR-4791, miR-1839-5p, miR-16-2-3p, miR-2284aa, miR-362-3p, miR-1388-5p, miR-544a, miR-450b-5p, miR-299a-5p, miR-2285f, miR-190b-5p, miR-212-3p, miR-7705, miR-877-3p, miR-371a-5p, miR-30b-5p, miR-3964, miR-499a-5p, miR-7689-3p, miR-7977, miR-126b-5p, miR-20a-3p, miR-203-3p, miR-2483-3p, miR-381-3p, miR-199b-5p, miR-493-5p, novel\_94, miR-96-5p, miR-195a-3p, miR-20a, miR-369-3p, miR-216c-5p, miR-376a-5p, miR-421-5p, miR-125b-2-3p, miR-130a-5p, miR-500a-5p, miR-30b, miR-26a-5p, miR-30d, miR-1277-5p, miR-106a, miR-466i-5p, miR-548e-3p, miR-106a, novel\_83, miR-148b-3p, miR-15a-5p, miR-98-3p, miR-124-3p, miR-5703, miR-217-5p, miR-30c-5p, miR-362-3p, miR-215-5p, miR-376a-5p, let-7a-3p, novel\_73, miR-142-3p, miR-19b-3p, miR-1271, miR-2330-3p, miR-3074-2-3p, miR-3074-5p, miR-129-2-3p, miR-338-3p, miR-98-3p, miR-655-3p, miR-3604, let-7b-3p, miR-129-5p, miR-190a-5p, miR-669a-3p, miR-155-5p, miR-6516-3p, miR-660-5p, miR-155-5p, miR-877-5p, miR-15b-5p, miR-544-3p, miR-192-5p, miR-6516, miR-129b-3p, miR-411, miR-655, miR-30d-5p, miR-299, let-7f-1-3p, miR-2285c, miR-543-3p, miR-186-5p, novel\_99, miR-133b-3p, let-7g-3p, miR-2312, miR-345-5p, miR-30f, miR-101-5p, miR-493-5p, let-7j, miR-503-3p, miR-345-5p, miR-654-3p, miR-190a, miR-105-5p, miR-17-5p, miR-106a-5p, miR-660, miR-466f-3p, miR-378a-5p, miR-31-5p, miR-6238, miR-544b, miR-20b, miR-3535, miR-2285g, miR-185-5p, miR-3431, miR-145a-5p, novel\_23, miR-653, miR-497-5p, miR-380-3p, miR-16b, miR-374c-5p, miR-199b-5p, miR-2284w, miR-3959-3p, miR-323c, miR-16a, miR-33a-3p, novel\_87, miR-15a, miR-129a, miR-20a-5p, miR-142b, miR-203b-5p, miR-147-5p, miR-611a, miR-380-5p, miR-23a-3p, miR-668-3p, miR-2310, miR-758-3p, miR-342, miR-1306-5p, miR-377-3p, miR-326, novel\_51, miR-3085-3p, miR-26b-3p, miR-145b, miR-142-3p, miR-3431, miR-539-5p, miR-544b, miR-126a-5p, miR-19b-2-5p, miR-223-3p, miR-145a-5p, miR-758-3p, miR-125b-2-3p, miR-544a, miR-1260b, miR-21b, miR-188-5p, miR-2889, miR-342-3p, miR-17-3p, miR-326-3p, miR-154a, miR-6402, miR-371a-5p, miR-425-5p, miR-6119-3p, miR-3968, miR-421-5p, miR-203b-5p, miR-502b, miR-3064-5p, miR-20a-3p, miR-3074-5p, miR-329-5p, miR-2319b, miR-499a-3p, miR-411b-3p, miR-489, miR-3082-5p, miR-148a-3p, miR-1306, miR-150-5p, miR-183-5p, miR-329a-5p, miR-2285w, miR-195a-3p, miR-3064-5p, miR-380-5p, miR-142a-3p, miR-130a-5p, miR-2432, miR-1260a, miR-210-5p, novel\_17, miR-17-3p, miR-6536, miR-21-3p, miR-152-3p, miR-548e-3p, miR-23b-3p, miR-7859, miR-758-5p, miR-23c, miR-148b-3p, novel\_83, miR-2284h-5p, miR-532-3p, miR-140-3p, miR-330-5p, miR-155-5p, miR-590-3p, miR-3074-5p, miR-103b, miR-425-5p, miR-323-3p, miR-1260b, miR-494-5p, miR-19b-1-5p, miR-338-5p, miR-17-3p, miR-155-5p, miR-767-5p, miR-592, miR-532-5p, miR-544-3p, miR-377-3p, miR-155-5p, miR-2448-3p, miR-301, miR-23b, miR-487b-5p, miR-767, miR-1814c

PHIP ENSOARGO(pleckstrin 331-5p, miR-432-3p, miR-214, miR-214-3p, miR-331-5p, novel\_103, miR-2448-3p, miR-331-5p

CDH2 ENSOARGO(cadherin 1306, miR-150-5p, miR-183-5p, miR-329a-5p, miR-2285w, miR-195a-3p, miR-3064-5p, miR-380-5p, miR-142a-3p, miR-130a-5p, miR-2432, miR-1260a, miR-210-5p, novel\_17, miR-17-3p, miR-6536, miR-21-3p, miR-152-3p, miR-548e-3p, miR-23b-3p, miR-7859, miR-758-5p, miR-23c, miR-148b-3p, novel\_83, miR-2284h-5p, miR-532-3p, miR-140-3p, miR-330-5p, miR-155-5p, miR-590-3p, miR-3074-5p, miR-103b, miR-425-5p, miR-323-3p, miR-1260b, miR-494-5p, miR-19b-1-5p, miR-338-5p, miR-17-3p, miR-155-5p, miR-767-5p, miR-592, miR-532-5p, miR-544-3p, miR-377-3p, miR-155-5p, miR-2448-3p, miR-301, miR-23b, miR-487b-5p, miR-767, miR-1814c

RSL1D1 ENSOARGO(ribosoma 331-5p, miR-432-3p, miR-214, miR-214-3p, miR-331-5p, novel\_103, miR-2448-3p, miR-331-5p

|       |                    |                                                                                                                                                                                                                                                                                                                                                                                                                                                                                                                                                                                                                                                                                                                                                                                                                                                                                                                                                                                                                                                                                                                                                                                                                                                                                                                                                                                                                               |
|-------|--------------------|-------------------------------------------------------------------------------------------------------------------------------------------------------------------------------------------------------------------------------------------------------------------------------------------------------------------------------------------------------------------------------------------------------------------------------------------------------------------------------------------------------------------------------------------------------------------------------------------------------------------------------------------------------------------------------------------------------------------------------------------------------------------------------------------------------------------------------------------------------------------------------------------------------------------------------------------------------------------------------------------------------------------------------------------------------------------------------------------------------------------------------------------------------------------------------------------------------------------------------------------------------------------------------------------------------------------------------------------------------------------------------------------------------------------------------|
| CELF1 | ENSOARGOC CUGBP, E | miR-505-3p, miR-409b, miR-105-1, miR-544b, miR-148b-5p, miR-1343-5p, miR-2904, miR-362-3p, miR-329-3p, miR-2889, miR-105-2, miR-544a, miR-362-3p, miR-3064-5p, miR-329a-5p, miR-185-3p, miR-105-5p, miR-362-3p, miR-1343-5p, miR-487b-5p, miR-124-5p, miR-3085-3p, miR-21-3p, miR-329-5p, miR-452-3p, miR-3064-5p, miR-489, miR-323-5p, miR-300-3p, miR-323a-5p, miR-487b-5p, miR-3591-3p, miR-140-5p, miR-186-5p, miR-505-3p, miR-329a, miR-495-3p, miR-3604, miR-494-5p, miR-2433, miR-487b-5p, miR-184-3p, miR-148a-5p, miR-378d, miR-378i, miR-362-3p, miR-378a-3p, miR-1197-5p, miR-210-3p, miR-383-5p, miR-15a-5p, miR-199a-3p, miR-532-3p, miR-18a-3p, miR-3600, miR-212-5p, miR-505-3p, novel_17, miR-422a, miR-345-3p, miR-29b-1-5p, miR-181b-1-3p, miR-125b-2-3p, miR-130a-5p, miR-2312, miR-543-3p, miR-625-5p, novel_99, miR-2285c, miR-433-3p, miR-15b-5p, miR-378a-3p, miR-30c-1-3p, miR-2331-3p, miR-548o-3p, miR-3065-3p, novel_107, miR-296-3p, miR-424-5p, miR-222-3p, miR-2285j, miR-19b-1-5p, miR-224-5p, miR-181c-5p, miR-378c, miR-129-2-3p, miR-3074-2-3p, miR-1388-5p, miR-378c, miR-362-3p, miR-16-2-3p, miR-3120-5p, miR-484, miR-6529a, miR-329-3p, miR-378b, miR-412-3p, miR-425-3p, miR-539-5p, miR-148b-5p, miR-221-3p, miR-2285e, miR-421, miR-548w, novel_78, miR-145b, miR-27a-3p, miR-181b-2-3p, novel_124, miR-487b-5p, miR-25-5p, miR-103a-2-5p, miR-199a-3p, miR-326, miR-29b-1-5p, miR- |
| KARS  | ENSOARGOC lysyl-tR | 362-3p, miR-16b, miR-30c-1-3p, miR-378d, miR-193a, miR-8485, miR-1b-5p, miR-424-5p, miR-652-5p, miR-335-3p, novel_94, miR-221, miR-378e, miR-3596, miR-2483-3p, miR-203-3p, miR-27a-3p, miR-24-1-5p, miR-2319b, miR-541-5p, miR-628-3p, miR-3958-3p, miR-4726-5p, miR-335, miR-218-5p, miR-2285n, miR-101-3p, miR-371a-5p, miR-1973, miR-107-5p, miR-877-3p, novel_111, miR-8095, miR-4454, miR-3059-5p, miR-212-3p, miR-1296-5p, miR-2285f, miR-181d-5p, miR-219a-5p, miR-452-5p, miR-9-5p, miR-411-3p, miR-345-3p, miR-3578, miR-2427, miR-330-5p, miR-505-5p, miR-9-5p, miR-322-5p, miR-302a-5p, miR-378h, miR-582-3p, miR-129-1-3p, miR-222, miR-7641, miR-412, miR-181b-5p, novel_127, miR-200a-3p, miR-1260a, miR-125a-3p, miR-30c-2-3p, miR-24-2-5p, miR-148b-5p, miR-1957a, novel_39, miR-3065-3p, miR-1271-3p, miR-495-5p, miR-2403, miR-876-3p, miR-10b-3p, miR-329a, miR-7144-5p, miR-1248, miR-671-5p, miR-365a-3p, miR-141-3p, novel_9, miR-                                                                                                                                                                                                                                                                                                                                                                                                                                                                     |



miR-848b, miR-30c-1-3p, miR-376b, miR-424-5p, miR-103a-2-5p, miR-146b, miR-182-5p, miR-29b-1-5p, miR-505, miR-320b, miR-126a-5p, miR-455-3p, miR-376b-3p, miR-147a, miR-27a-3p, miR-330-3p, miR-1a-3p, miR-412-3p, miR-154a, miR-9-5p, miR-2447, miR-2284q, miR-628-3p, miR-107-5p, miR-2440, miR-101-3p, miR-27a-3p, miR-376d, miR-203-3p, miR-211-5p, miR-126b-5p, miR-7977, miR-2319b, miR-376a-3p, miR-3963, miR-409-5p, miR-361-3p, miR-143-3p, miR-2432, miR-2424, miR-146a-5p, miR-130a-5p, miR-29b-1-5p, miR-195a-3p, miR-2285w, miR-329a-5p, miR-2484, miR-299-3p, miR-34b-5p, miR-466i-5p, miR-219b-5p, miR-500a-5p, miR-2284h-5p, miR-15a-5p, miR-210-3p, miR-487a-3p, miR-485-3p, miR-34a-5p, miR-4429, miR-188-3p, miR-5703, miR-2904, miR-2300b-3p, miR-206-3p, miR-6525, miR-3074-5p, miR-130b-5p, miR-129-5p, miR-487a-5p, miR-708-5p, miR-155-5p, miR-29b-2-5p, miR-665, miR-3604, miR-15b-3p, miR-155-5p, miR-204-3p, miR-27a-5p, miR-182-5p, miR-3065-3p, miR-21-3p, miR-216b-3p, miR-548o-3p, miR-140-5p, miR-30c-1-3p, miR-2331-3p, novel\_99, miR-625-5p, miR-18a-5p, miR-133b-3p, miR-433-3p, miR-27b-5p, miR-598-3p, miR-539-3p, miR-6240, miR-130b-5p, miR-330-3p, miR-377-3p, miR-146a, miR-149-5p, miR-3431, miR-412-5p, miR-187-3p, miR-3955-5p, miR-27b-3p, miR-219a-1-3p, miR-16-1-3p, miR-29b, miR-21-5p, miR-542-3p, miR-1285, miR-1843b-5p, miR-2284w, miR-449a, miR-211, miR-29c-3p, miR-6123, miR-29a, miR-206, novel\_1, miR-379-3p, miR-33a-3p, miR-34c, miR-133a-5p, miR-6535, miR-669, miR-670-3p, miR-299b-3p, miR-34b, miR-29a-3p, miR-7-1-3p, miR-3074-5p, miR-329-5p, miR-195a-5p, miR-146b-5p, miR-2319a, miR-450b-3p, miR-216a-3p, miR-376b-3p, miR-3591-3p, miR-18b, miR-2285b, miR-1271-3p, miR-29a-5p, miR-3065-3p, miR-2478, miR-1, miR-29b-2-5p, miR-2385-3p, miR-6536, miR-450a-2-3p, miR-30f, miR-30c-2-3p, miR-611a-5p, miR-376b-3p, novel\_121, miR-

miR-34b-5p, miR-767, miR-671-5p, miR-48b-5p, miR-190a-3p, miR-3154, miR-199a-5p, miR-133c, miR-503-3p, miR-2355-5p, miR-767-5p, miR-28-5p, miR-2332, miR-29b-3p, miR-3969, miR-6128, let-7d, miR-10a-5p, miR-496, miR-128-3p, miR-615-3p, miR-330-5p, miR-29d-3p, miR-758-5p, miR-483-3p, miR-9-5p, miR-302a-5p, miR-2284z, miR-2285ad, let-7f-5p, miR-17-3p, miR-2898, miR-152-3p, miR-543-5p, miR-125a-3p, let-7c-5p, miR-28b, let-7g, miR-199a-5p, novel\_39, miR-1957a, miR-4286, let-7e-5p, miR-148a-3p, miR-216a-3p, miR-150-5p, miR-29a-3p, miR-411b-3p, miR-10a-5p, novel\_1, miR-29a, miR-199c, miR-656-5p, miR-28c, miR-6402, miR-382-5p, let-7i, miR-199b-5p, miR-2428, miR-326-3p, miR-342-3p, miR-17-3p, miR-758-5p, miR-29c-3p, miR-30b-3p, miR-29b, miR-27b-3p, miR-4508, miR-1285, miR-7b-5p, miR-873a-5p, miR-194-5p, miR-134-3p, let-7g-5p, miR-185-5p, miR-31-5p, miR-483-3p, miR-377-3p, miR-7-5p, miR-194a, miR-C9orf152 ENSOARGO( chromosome 22841, miR-345-5p, miR-130b-5p, miR-382, miR-345-5p, miR-6130, miR-10a, miR-377-3p, let-7i-5p, miR-140-5p, miR-504-5p, miR-17-3p, miR-664a, miR-130b-5p, miR-708-5p, miR-4492, let-7f, miR-324-3p, miR-151-3p, miR-6525, miR-10b-5p, let-7b-5p, miR-4510, let-7b, miR-433-5p, miR-3074-2-3p, miR-425-5p, novel\_73, miR-378d, miR-218-1-3p, miR-1961, miR-2300b-3p, miR-140-3p, miR-5703, miR-124-3p, miR-148b-3p, miR-3600, miR-380-5p, miR-98-5p, let-7k, novel\_17, miR-185-3p, miR-219b-5p, miR-421-5p, miR-143-3p, miR-2887, miR-504, miR-199b-5p, miR-140-5p, miR-361-3p, miR-378g, miR-27a-3p, let-7d-5p, miR-203-3p, miR-452-3p, miR-7977, miR-3968, miR-615, miR-2285n, miR-2285y, miR-361-3p, miR-877-3p, miR-452-5p, miR-194b-5p, miR-9-5p, miR-2284aa, miR-10b, miR-6529a, miR-3962, miR-758-3p, miR-30b-3p, miR-9788-3p, miR-199b-3p, miR-151a-3p, miR-548w, miR-27a-3p, let-7e, miR-199b-5p, miR-326, miR-342, miR-2310, miR-758-

miR-758-3p, miR-101c, miR-1839-5p, miR-181b-2-3p, miR-548w, miR-455-3p, miR-148b-5p, miR-1185-3p, miR-1298-3p, miR-539-5p, miR-505, miR-29b-1-5p, miR-16b, miR-103a-2-5p, miR-487b-5p, miR-23a-3p, miR-2284b, miR-8485, miR-2310, miR-1983, miR-96-5p, miR-2285u, miR-126b-5p, miR-2284g, miR-2319b, miR-1185-2-3p, miR-3596, miR-2483-3p, novel\_82, miR-9-5p, miR-190b-5p, miR-2284j, miR-2447, miR-217-5p, miR-1961, miR-193b-5p, miR-2284u, miR-30d-3p, miR-7859, miR-23b-3p, miR-23c, miR-500a-5p, miR-618, let-7k, miR-98-5p, miR-99a-3p, miR-2285w, miR-486-3p, miR-181b-1-3p, miR-598-3p, miR-487b-5p, miR-548o-3p, let-7i-5p, miR-15b-5p, miR-377-3p, miR-30a-3p, miR-219b-3p, let-7f, miR-30e-3p, miR-190a-5p, novel\_74, miR-487b-5p, miR-3958-5p, let-7b, miR-181c-5p, miR-6525, novel\_44, miR-197-3p, miR-497-5p, miR-2284x, miR-16b, miR-31-5p, novel\_116, miR-412-5p, miR-3431, miR-105-3p, miR-377-3p, miR-193a-3p, miR-6240, let-7j, let-7a-2-3p, miR-2284l, miR-150-5p, miR-3591-3p, miR-376b-5p, let-7e-5p, miR-410-5p, miR-412-3p, novel\_68, miR-216b-3p, miR-677, miR-320c, miR-181b-3p, miR-374c-3p, miR-576-3p, miR-193b-3p, miR-1a-1-5p, miR-374c-5p, miR-2427, miR-3591-5p, miR-1290, miR-412, miR-2285ad, miR-6517, miR-429-3p, novel\_121, miR-486-5p, miR-9-5p, miR-322-5p, miR-219-3p, miR-8117, miR-200a-3p, let-7f-5p, miR-1a-2-5p, miR-2284y, let-7g, miR-376c-5p, miR-23b, miR-1248, miR-876-3p, miR-2318, miR-99a-3p, miR-2285aa, miR-503-3p, miR-300-3p, miR-2284k, miR-494-5p, miR-592, miR-16-5p, miR-1260b, miR-7857, miR-412-3p, miR-125b-2-3p, miR-3120-5p, miR-2426, miR-105-1, novel\_4, miR-320b, let-7e, let-7c-3p, let-7a-5p, miR-424-5p, miR-758-3p, let-7d-5p, miR-2285y, miR-107-5p, miR-2285n, miR-2285t, miR-2284q, miR-3958-3p, miR-4726-5p, miR-181d-5p, miR-212-3p, miR-219a-2-3p, miR-2904, miR-126-3p, miR-

miR-148a-5p, miR-16-1-3p, miR-19b-3p, miR-4429, miR-33b-3p, miR-5703, miR-98-3p, miR-1961, miR-199a-3p, miR-148b-3p, miR-505-3p, miR-3600, let-7k, miR-221-5p, miR-98-5p, miR-466i-5p, miR-2284m, miR-320d, miR-345-3p, miR-486-3p, miR-130a-5p, miR-181b-1-3p, miR-125b-2-3p, miR-664b-3p, novel\_99, miR-582-5p, miR-345-5p, miR-133b-3p, let-7g-3p, let-7f-1-3p, let-7i-5p, miR-204-3p, miR-582-5p, miR-301a-3p, miR-6516, miR-377-3p, miR-216b-3p, miR-3065-3p, miR-496-3p, miR-504-5p, miR-221-5p, miR-545-3p, miR-208b-5p, miR-454-3p, miR-129-5p, miR-17-3p, miR-6516-3p, miR-451a, let-7f, miR-15b-3p, miR-2285j, let-7b-3p, let-7b-5p, miR-98-3p, miR-6525, miR-2330-3p, miR-129-2-3p, let-7b, miR-539-5p, miR-101c, miR-450b-5p, miR-101a-5p, miR-1388-5p, miR-125b-2-3p, miR-30b-3p, miR-501-3p, miR-323b, miR-1185-3p, miR-148b-5p, miR-9788-3p, miR-455-3p, miR-147a, miR-1298-3p, miR-145b, miR-181b-2-3p, miR-105-1, miR-548w, let-7e, miR-199b-5p, miR-3955-3p, miR-130b-3p, miR-491-5p, miR-323b-3p, miR-505, miR-2957, miR-326, novel\_115, novel\_103, miR-199a-3p, miR-342, miR-320b, miR-2310, miR-491-3p, let-7a-5p, miR-9-3p, miR-504, miR-129b-5p, miR-381-3p, miR-199b-5p, miR-500-3p, miR-1185-2-3p, miR-144-5p, let-7d-5p, miR-2483-3p, miR-3082-5p, miR-7857-3p, miR-126b-5p, miR-211-5p, miR-2285u, miR-499b-5p, miR-452-3p, miR-2284q, miR-628-3p, miR-499a-5p, miR-502-3p, miR-1285-5p, miR-9-5p, miR-190b-5p, miR-885-5p, miR-2447, miR-3059-5p, miR-4454, miR-496, miR-105-2, let-7d, miR-582-3p, miR-411-3p, miR-501-3p, miR-330-5p, miR-134, miR-345-3p, novel\_121, miR-129-1-3p, miR-214-5p, miR-134-5p, miR-483-3p, miR-758-5p, miR-6516-5p, miR-9-5p, miR-302a-5p, novel\_96, miR-200a-3p, miR-152-3p, miR-127-5p, miR-6536, let-7f-5p, miR-17-3p, let-7c-5p, miR-3071-3p, miR-664-3p, miR-2285b, novel\_29, miR-200a, let-7g, miR-3065-3p, miR-4492, miR-625-5p, miR-185-3p, novel\_51, miR-1306, novel\_19, miR-1306-5p, miR-6134, miR-2428, miR-4532, miR-423-5p, miR-3184-5p, miR-423-3p, miR-2331-3p, miR-1306-5p, miR-214-3p, miR-125a-5p, miR-3085-3p, miR-378a-5p, miR-376b, miR-363-5p, miR-3187-3p, miR-432-3p, miR-30c-1-3p, miR-30b-3p, miR-4791, miR-542-3p, miR-484, miR-1260b, miR-30b-3p, miR-377-5p, miR-26b-3p, miR-2300a-5p, miR-31-5p, miR-3535, miR-576-3p, miR-6529b, miR-30b-5p, miR-4324, miR-450a-5p, miR-4726-5p, miR-877-3p, miR-18a-3p, miR-1306, miR-135b-5p, miR-504, miR-216b-3p, miR-329-5p, miR-3064-5p, miR-7857-3p, miR-125b, miR-185-3p, miR-30f, miR-324-3p, miR-30c-2-3p, miR-1260a, miR-30b, novel\_127, miR-221-5p, miR-30d, miR-30b-3p, miR-760-3p, miR-127-5p, miR-2898, miR-3064-5p, miR-495-5p, miR-329a-5p, miR-450c-5p, miR-3065-3p, miR-377-5p, miR-130a-5p, miR-376a-5p, miR-1197-5p, miR-30a-5p, miR-5703, miR-3578, novel\_133, miR-30c-5p, miR-30c, miR-184-3p, miR-212-5p, miR-18a-3p, miR-758-5p, miR-320e, miR-135a-5p, miR-331-3p, miR-125b-5p, miR-487a-5p, miR-4492, miR-214, miR-6128, miR-4510, miR-1260b, miR-30d-5p, miR-30e-5p, miR-1827, miR-671-5p, miR-625-5p, miR-10b-3p, miR-552-3p, miR-125a, miR-2355-5p, miR-3065-3p, miR-30c-1-3p, miR-504-5p, miR-221-5p, miR-154b-5p, miR-6130

|        |                    |                                                                                                                                                                                                                                                                                                                                                                                                                                                                                                                                                                                                                                                                                                                                                                                                                                                                                                                                                                                                                                                                                                                                                                                                                                                                                                                                                                                                                                                                                                                                                                                                                                                                                                                                                                                                                                                                               |
|--------|--------------------|-------------------------------------------------------------------------------------------------------------------------------------------------------------------------------------------------------------------------------------------------------------------------------------------------------------------------------------------------------------------------------------------------------------------------------------------------------------------------------------------------------------------------------------------------------------------------------------------------------------------------------------------------------------------------------------------------------------------------------------------------------------------------------------------------------------------------------------------------------------------------------------------------------------------------------------------------------------------------------------------------------------------------------------------------------------------------------------------------------------------------------------------------------------------------------------------------------------------------------------------------------------------------------------------------------------------------------------------------------------------------------------------------------------------------------------------------------------------------------------------------------------------------------------------------------------------------------------------------------------------------------------------------------------------------------------------------------------------------------------------------------------------------------------------------------------------------------------------------------------------------------|
| PSAP   | ENSOARGO( prosapos | <p>miR-1193, miR-19b-2-5p, miR-450b-5p, miR-184-3p, miR-380-5p, miR-505-3p, miR-548e-3p, miR-2300a-5p, miR-421, miR-185-5p, miR-503-5p, miR-6516-5p, miR-503-5p, miR-542-5p, miR-199b-5p, miR-214-3p, miR-542-5p, miR-503-5p, miR-3065-3p, miR-199a-5p, miR-129b-3p, miR-199b-5p, miR-505-3p, miR-3065-3p, miR-2355-5p, miR-615-5p, miR-3120-3p, miR-199a-5p, miR-6516, miR-6130, miR-19b-1-5p, miR-421-5p, miR-542-5p, miR-214, miR-758-5p, miR-1306-5p, miR-4510, miR-199b-5p, miR-877-3p, miR-361-3p, miR-3959-3p</p> <p>miR-128-3p, miR-10a-5p, miR-1343-5p, miR-1197-5p, miR-2300b-3p, miR-215-5p, miR-2408, miR-383-5p, miR-505-5p, miR-148b-3p, miR-6517, miR-221-5p, miR-152-3p, miR-127-5p, miR-30c-2-3p, miR-185-3p, miR-125b, miR-181c-3p, miR-125a-3p, miR-2432, miR-181b-1-3p, miR-3064-5p, miR-1, miR-7144-5p, miR-3154, novel_32, miR-301a-3p, miR-10a, miR-192-5p, miR-499b-3p, miR-323-5p, miR-370-3p, miR-125a, miR-215-5p, miR-615-5p, miR-30c-1-3p, miR-504-5p, miR-221-5p, miR-454-3p, miR-6516-3p, miR-664a, miR-125b-5p, miR-135a-5p, miR-551b-3p, miR-181c-3p, miR-365a-5p, miR-6134, miR-10b-5p, miR-206-3p, miR-3074-5p, miR-3184-3p, miR-455-5p, miR-1388-5p, miR-1a-3p, miR-873a-5p, miR-10b, miR-1843b-5p, miR-1185-3p, miR-185-5p, miR-147a, miR-2320-3p, miR-130a-3p, miR-181b-2-3p, miR-31-5p, miR-340-3p, miR-330-3p, novel_78, novel_4, miR-125a-5p, miR-1343-5p, miR-124-5p, miR-3085-3p, miR-130b-3p, miR-330-3p, miR-3141, miR-365b-5p, miR-455-5p, miR-30c-1-3p, miR-628-5p, miR-6240, miR-135b-5p, miR-181a-3p, miR-504, miR-216a-3p, miR-148a-3p, miR-3141, miR-2387, miR-677, miR-203-3p, miR-1185-2-3p, miR-181b-3p, miR-499a-3p, miR-323a-5p, miR-146b-3p, miR-489, miR-655-5p, miR-10a-5p, miR-3064-5p, miR-3074-5p, miR-490-5p, miR-206, novel_27, miR-301b-3p, miR-2428, miR-24-3p, miR-1296-5p, miR-135a-2-3p, miR-219b-3p</p> |
| BPIFB1 | ENSOARGO(BPI fold  | <p>miR-22-5p, miR-186-5p, miR-669a-3p, miR-1248, miR-2355-5p, miR-361-3p, miR-101-3p</p>                                                                                                                                                                                                                                                                                                                                                                                                                                                                                                                                                                                                                                                                                                                                                                                                                                                                                                                                                                                                                                                                                                                                                                                                                                                                                                                                                                                                                                                                                                                                                                                                                                                                                                                                                                                      |
| FCRL1  | ENSOARGO(Fc recep  | <p>miR-22-5p, miR-186-5p, miR-669a-3p, miR-1248, miR-2355-5p, miR-361-3p, miR-101-3p</p>                                                                                                                                                                                                                                                                                                                                                                                                                                                                                                                                                                                                                                                                                                                                                                                                                                                                                                                                                                                                                                                                                                                                                                                                                                                                                                                                                                                                                                                                                                                                                                                                                                                                                                                                                                                      |

TGM6

ENSOARGO( transglu

miR-3653-3p, miR-202-5p, miR-320d, miR-26a-5p, miR-183-5p, miR-503-5p, miR-184-3p, miR-4429, miR-2904, miR-1193, miR-140-3p, miR-1197-5p, miR-5703, miR-215-5p, miR-2366, miR-15a-5p, miR-505-3p, miR-487a-5p, miR-424-5p, miR-129-5p, miR-874-5p, miR-487b-5p, miR-219b-3p, miR-665, miR-15b-3p, miR-6134, miR-206-3p, miR-129-2-3p, novel\_99, miR-345-5p, miR-129b-3p, miR-487b-5p, miR-15b-5p, miR-499b-3p, miR-544-3p, miR-377-3p, miR-192-5p, miR-370-5p, miR-30c-1-3p, miR-199b-5p, miR-103a-2-5p, miR-3085-3p, miR-2957, miR-505, miR-16b, miR-320b, miR-2310, miR-30c-1-3p, miR-376b, miR-424-5p, miR-544a, miR-1a-3p, miR-541, miR-2320-3p, miR-628-3p, miR-3968, miR-107-5p, miR-219a-2-3p, novel\_111, miR-9-5p, miR-452-5p, miR-3059-5p, miR-541-3p, miR-493-5p, miR-877-3p, miR-199b-5p, miR-7857-3p, miR-499a-3p, miR-2483-3p, miR-3082-5p, miR-7977, miR-3064-5p, miR-4792, miR-452-3p, miR-2898, miR-30c-2-3p, miR-205-5p, miR-219-3p, miR-199a-5p, miR-200a, miR-450b-5p, miR-3064-5p, miR-1, miR-2385-3p, miR-4286, miR-1343-5p, miR-3591-5p, miR-129-1-3p, miR-322-5p, miR-9-5p, miR-1224-5p, miR-135a-1-3p, miR-370-5p, miR-365a-5p, miR-16-5p, miR-6128, miR-1306-5p, miR-1814c, miR-345-5p, miR-320a, miR-199a-5p, miR-374c-3p, miR-615-5p, miR-215-5p, miR-1343-5p, miR-378a-5p, miR-365b-5p, novel\_51, miR-503-5p, miR-296-3p, miR-377-3p, miR-296-3p, miR-345-5p, miR-654-3p, miR-432-3p, miR-493-5p, miR-497-5p, miR-16b, miR-374b-3p, miR-3071-5p, miR-873a-5p, miR-1843b-5p, miR-544b, miR-503-5p, miR-26b-3p, miR-133b-5p, miR-656-5p, miR-206, miR-16a, miR-15a, miR-199b-5p, miR-1193, miR-7975, miR-195a-5p, miR-505-3p, miR-320c, miR-677, miR-374c-3p, miR-320b, miR-26b-5p

miR-541-3p, miR-2447, miR-423-5p, miR-2285y, novel\_82, miR-154-3p, miR-2285t, miR-450a-5p, miR-7977, miR-452-3p, miR-139-5p, miR-4443, miR-27a-3p, miR-203-3p, miR-3082-5p, miR-25, miR-7857-3p, miR-378g, miR-129b-5p, miR-378j, miR-1983, miR-544-5p, novel\_94, miR-33a-5p, miR-23a-3p, miR-494-3p, miR-2310, miR-758-3p, miR-193a, miR-8485, miR-30c-1-3p, miR-182-5p, miR-29b-1-5p, miR-1306-5p, novel\_103, miR-214-3p, miR-25-5p, miR-3955-3p, miR-145b, miR-27a-3p, novel\_78, miR-2300a-5p, novel\_4, miR-409b, miR-548w, miR-455-3p, miR-147a, miR-1298-3p, miR-2320-3p, miR-425-3p, miR-758-3p, miR-30b-3p, miR-10b, miR-541, miR-484, miR-2284aa, miR-21b, miR-101c, miR-101a-5p, miR-450b-5p, miR-1388-5p, miR-214, miR-665-5p, miR-3074-2-3p, miR-3074-5p, miR-4510, miR-6134, miR-3184-5p, novel\_44, miR-10b-5p, miR-665, miR-29b-2-5p, miR-4492, miR-17-3p, miR-182-5p, miR-3065-3p, miR-154a-3p, miR-21-3p, miR-30c-1-3p, miR-2331-3p, miR-204-3p, miR-6130, miR-139-5p, miR-10a, miR-132-5p, miR-582-5p, miR-2284s, miR-6516, miR-433-3p, miR-582-5p, novel\_99, miR-1827, miR-186-5p, miR-625-5p, miR-885-3p, miR-339b, miR-154b-3p, miR-183-5p, miR-216c-5p, miR-2424, miR-486-3p, miR-29b-1-5p, miR-376a-5p, miR-125b, miR-324-3p, miR-216a-5p, miR-299-3p, miR-485-3p, miR-3600, miR-3960, miR-1247-5p, miR-23c, miR-487a-3p, miR-23b-3p, miR-1193, miR-140-3p, miR-1434-5p, miR-5703, miR-2904, miR-2300b-3p, novel\_133, miR-361-5p, miR-16-1-3p, miR-184-3p, miR-17-3p, miR-3957-3p, novel\_87, miR-142b, miR-576-3p, miR-6529b, miR-4324, miR-502-5p, miR-147-5p, miR-6123, miR-22-5p, miR-379-3p, novel\_1, miR-128-1-5p, miR-10a-5p, miR-3074-5p, miR-6535, miR-411b-3p, miR-299b-3p, miR-3591-3p, miR-216a-3p, miR-378b, miR-1306, miR-150-5p, miR-376a-2-5p, miR-412-3p, miR-432-3p, novel\_51, miR-1343-5p, miR-452-5p, miR-125a-5p, miR-483-3p, miR-330-5p, miR-133b-5p, miR-31-

AQP4

ENSOARGO(aquaporin)

miR-216a-3p, miR-3065-5p, miR-2285ab, let-7e-5p, miR-2319a, miR-7-1-3p, miR-3120-3p, miR-329-5p, miR-144-3p, miR-2404, let-7i, miR-33a-3p, miR-425-5p, miR-203b-5p, miR-421-5p, miR-495-3p, miR-199b-5p, miR-2284w, miR-323c, miR-1434-3p, miR-19b-2-5p, miR-2284x, miR-2355-3p, let-7g-5p, miR-134-3p, miR-503-5p, miR-3535, miR-365b-5p, miR-190a, miR-105-5p, miR-503-5p, miR-196b-5p, miR-363-5p, miR-503-3p, miR-539-3p, miR-2318, miR-141-3p, miR-1271, miR-487a-3p, miR-199a-5p, miR-409-3p, miR-6740-5p, miR-331-3p, miR-365a-5p, miR-374a-3p, miR-1290, miR-196a-5p, miR-128-3p, miR-105-2, let-7d, miR-1224-5p, miR-412, miR-129-1-3p, miR-545-5p, miR-2284z, miR-6516-5p, let-7c-5p, miR-30c-2-3p, miR-200a-3p, let-7f-5p, miR-6536, miR-30a-3p, miR-3529-3p, miR-2285b, let-7g, miR-199a-5p, miR-199b-5p, miR-140-5p, miR-2285u, miR-2319b, let-7d-5p, miR-378g, miR-2440, miR-2285n, miR-154-3p, miR-374a-3p, miR-190b-5p, miR-2285f, miR-154a, miR-1285-5p, miR-361-3p, miR-412-3p, miR-4791, miR-2284aa, miR-450b-5p, miR-151a-3p, miR-105-1, miR-147a, miR-1298-3p, let-7e, miR-199b-5p, miR-487b-5p, miR-3955-3p, miR-1185-5p, miR-101b-3p, let-7a-5p, miR-491-3p, miR-8485, miR-30c-1-3p, miR-433-3p, miR-27b-5p, miR-582-5p, miR-154b-3p, miR-2312, miR-154a-3p, miR-545-3p, miR-30c-1-3p, let-7i-5p, miR-6516, miR-582-5p, miR-30a-3p, miR-151-3p, miR-19b-1-5p, miR-30e-3p, let-7f, miR-4492, miR-129-5p, miR-190a-5p, novel\_74, miR-129-2-3p, miR-590-3p, let-7b, let-7b-5p, miR-5703, miR-1961, miR-193b-5p, miR-664-5p, novel\_73, miR-30d-3p, miR-485-3p, miR-3600, miR-487a-3p, miR-185-3p, let-7k, miR-98-5p, miR-466i-5p, miR-503-5p, miR-487a, miR-130a-5p, miR-664b-3p, miR-421-5p



miR-193a-5p, miR-1260b, miR-10b-3p, miR-1306-3p, miR-2433, miR-331-3p, miR-138-5p, miR-486b-3p, miR-874-3p, miR-574-5p, miR-615-5p, miR-1271, miR-370-3p, miR-2355-5p, miR-2285aa, miR-300-3p, miR-34c-5p, miR-199a-5p, miR-3154, let-7g-3p, miR-329b, miR-10b-3p, miR-485-5p, miR-1814c, miR-7144-5p, miR-4286, miR-181a-2-3p, miR-1271-3p, novel\_39, miR-376b-5p, miR-199a-5p, miR-376c-5p, miR-125a-3p, miR-1260a, miR-30c-2-3p, miR-181b-5p, miR-191-3p, miR-17-3p, miR-543-5p, miR-152-3p, novel\_96, novel\_127, miR-6517, miR-299a-3p, miR-7641, miR-758-5p, miR-505-5p, miR-214-5p, miR-486-5p, miR-345-3p, miR-23b-5p, miR-330-5p, miR-1343-5p, miR-885-3p, let-7a-2-3p, miR-10a-5p, miR-135a-2-3p, miR-342-3p, miR-17-3p, novel\_101, miR-193b-3p, miR-24-3p, miR-199b-5p, miR-449a, miR-326-3p, miR-34c, miR-22-5p, miR-329-5p, miR-378b, miR-10a-5p, miR-26b-5p, miR-34b, miR-299b-3p, miR-670-3p, miR-323a-5p, miR-669, miR-3141, miR-148a-3p, miR-2387, miR-2285ab, miR-3591-3p, miR-3065-5p, miR-18a-3p, miR-1306, miR-150-5p, miR-363-5p, miR-432-3p, miR-432-3p, miR-2285r, let-7a-2-3p, miR-296-3p, miR-296-3p, miR-7-5p, miR-2411-3p, miR-3141, miR-193a-3p, miR-1343-5p, miR-340-3p, miR-31-5p, miR-185-5p, miR-432-5p, miR-2285g, miR-3535, miR-544b, miR-194-3p, miR-181a-5p, miR-1285, miR-7b-5p, miR-542-3p, miR-873a-5p, miR-432, miR-1260b, miR-30b-3p, miR-138, miR-6239, miR-744-5p, miR-145a-3p, miR-4510, miR-214, miR-346, miR-10b-5p, miR-6525, miR-6134, miR-181c-5p, miR-3184-5p, miR-122-5p, miR-665, miR-320e, miR-664a, miR-17-3p, miR-500, miR-4492, miR-1468-5p, miR-221-5p, miR-30c-1-3p, miR-2331-3p, miR-504-5p, miR-296-3p, miR-21-3p, miR-6130, miR-323-5p, miR-193b-3p, miR-544-3p, miR-582-5p, miR-10a, miR-2284s, miR-151b, novel\_32, miR-2285c, miR-129b-3p, miR-500a-3p, let-7g-3p, miR-2312, miR-582-5p, miR-186-5p, miR-1827, miR-1895, miR-885-3p, miR-625-

miR-10a, miR-139-5p, miR-296-3p, miR-30c-1-3p, miR-545-3p, miR-378a-3p, miR-32-3p, miR-129b-3p, miR-21a-3p, miR-10b-5p, miR-590-3p, miR-378c, miR-487b-5p, miR-30a-3p, miR-30e-3p, miR-383-5p, miR-3600, miR-30d-3p, miR-16-1-3p, miR-2904, miR-5703, miR-378a-3p, miR-378i, miR-142a-3p, miR-329a-5p, miR-422a, miR-345-3p, miR-618, miR-2285p, miR-203-3p, miR-27a-3p, miR-1185-2-3p, miR-378e, miR-3082-5p, miR-374b-5p, miR-139-5p, miR-664b, miR-20a-3p, novel\_94, miR-378j, miR-140-5p, miR-9-5p, miR-32-3p, miR-3964, miR-499a-5p, miR-3968, miR-107-5p, miR-101-3p, miR-455-3p, miR-1185-3p, miR-496-5p, miR-425-3p, miR-2320-3p, miR-142-3p, miR-27a-3p, miR-21b, miR-1388-5p, miR-378c, miR-2426, miR-484, miR-2284r, miR-378b, miR-10b, miR-378d, miR-30c-1-3p, miR-2330-5p, miR-2285o, miR-103a-2-5p, miR-3955-3p, miR-487b-5p, miR-342, novel\_115, miR-223-5p, miR-133c, miR-365a-3p, miR-3068-3p, miR-7144-5p, miR-671-5p, miR-2318, miR-378c, miR-6128, miR-374b, miR-28a-3p, miR-331-3p, miR-24-2-5p, miR-9-5p, miR-483-3p, miR-378h, miR-10a-5p, miR-345-3p, miR-3591-5p, novel\_39, miR-192-3p, miR-450b-5p, miR-30a-3p, miR-2403, miR-543-5p, miR-28-3p, miR-200c-3p, miR-30c-2-3p, miR-664-3p, miR-200c, miR-125a-3p, miR-411b-3p, miR-7-1-3p, miR-10a-5p, miR-2319a, miR-378f, miR-24-3p, miR-342-3p, miR-136-3p, miR-656-5p, miR-502-5p, miR-432-5p, miR-3431, miR-26a-2-3p, miR-27b-3p, miR-380-3p, miR-16-1-3p, miR-432, miR-873a-5p, miR-1285, miR-223-3p, miR-296-3p, miR-2285r, miR-452-5p, miR-483-3p, miR-2285l, miR-2411-3p, miR-296-3p

miR-200b-3p, miR-496, miR-10a-5p, miR-88b-3p, miR-330-5p, miR-501-3p, miR-345-3p, miR-322-5p, miR-1271-5p, miR-429-3p, novel\_127, novel\_96, miR-2898, miR-200c-3p, miR-30c-2-3p, miR-1260a, miR-219-3p, miR-200c, novel\_39, miR-29b-2-5p, miR-3064-5p, miR-4286, miR-671-5p, miR-1248, miR-767, miR-876-3p, miR-329a, miR-2318, miR-320a, miR-362-5p, miR-488-3p, miR-503-3p, miR-154b-5p, miR-300-3p, miR-34c-5p, miR-3965, miR-2355-5p, miR-503-3p, miR-874-3p, miR-486b-3p, miR-767-5p, miR-135a-5p, miR-3969, miR-1-5p, miR-365a-5p, miR-500b-5p, miR-323-3p, miR-1260b, miR-16-5p, miR-497-5p, miR-7862, miR-16b, miR-30b-3p, miR-219a-1-3p, miR-16-1-3p, miR-1260b, miR-3071-5p, miR-1434-3p, novel\_116, miR-149-5p, miR-134-3p, miR-3431, miR-185-5p, miR-665, miR-340-3p, miR-133b-5p, miR-193a-3p, miR-466f-3p, miR-124-5p, miR-365b-5p, miR-3141, novel\_51, miR-2411-3p, miR-377-3p, miR-296-3p, miR-296-3p, miR-432-3p, miR-654-3p, miR-432-3p, miR-2483-5p, miR-135b-5p, miR-6395, miR-195a-5p, miR-410-5p, miR-1306, miR-3065-5p, miR-18a-3p, miR-3141, miR-6535, miR-320c, miR-146b-3p, miR-34b, novel\_69, miR-10a-5p, novel\_68, miR-3074-5p, miR-199c, miR-6119-3p, miR-34c, miR-16a, novel\_87, miR-1247-3p, miR-15a, miR-326-3p, novel\_27, miR-449a, miR-2428, miR-323c, miR-371b-3p, miR-3957-3p, miR-193b-3p, miR-342-3p, miR-1a-1-5p, miR-136-3p, miR-16-1-3p, miR-34a-5p, miR-378d, miR-4429, miR-5703, miR-2408, miR-362-3p, miR-2366, novel\_83, miR-199a-3p, miR-328-3p, miR-200b, miR-15a-5p, miR-18a-3p, miR-34b-5p, miR-221-5p, miR-21-3p, miR-2484, miR-320d, miR-760-3p, miR-219b-5p, miR-324-3p, miR-500a-5p, miR-216a-5p, miR-345-3p, miR-185-3p, miR-486-3p, miR-183-5p, miR-885-3p, miR-1827, miR-129b-3p, novel\_32, miR-15b-5p, miR-10a, miR-377-3p, miR-2284s, miR-193b-3p, miR-216b-3p, miR-140-5p, miR-30c-1-3p, miR-221-5p, miR-2331-3p, miR-496-3p, miR-487a-5p, miR-

miR-142-3p, miR-421, miR-9/88-3p, miR-1343-3p, miR-151a-3p, miR-362-3p, miR-143-5p, miR-6529a, miR-329-3p, miR-3962, miR-125b-2-3p, miR-30b-3p, miR-1b-5p, miR-2310, miR-8485, miR-424-5p, miR-124a, miR-3085-3p, miR-491-5p, miR-214-3p, miR-320b, miR-199a-3p, miR-16b, miR-29b-1-5p, miR-505, miR-362-3p, miR-3082-5p, miR-25, miR-2319b, miR-3064-5p, miR-4792, miR-7977, miR-499b-5p, miR-129b-5p, miR-154a, miR-9-5p, miR-3968, miR-2284q, miR-154-3p, miR-2440, miR-218-5p, miR-15a-5p, miR-222-5p, miR-487a-3p, miR-199a-3p, miR-151-5p, novel\_73, miR-4429, miR-2300b-3p, miR-362-3p, miR-126-3p, miR-188-3p, miR-1197-5p, miR-5703, miR-124-3p, miR-130a-5p, miR-142a-3p, miR-29b-1-5p, miR-486-3p, miR-487a, miR-503-5p, miR-320d, miR-2285p, novel\_17, miR-196a-3p, miR-92a-1-5p, miR-500a-5p, miR-6130, miR-193b-3p, miR-151b, miR-15b-5p, miR-22-3p, miR-660-5p, miR-32-5p, miR-296-3p, miR-154a-3p, miR-1827, miR-21a-3p, miR-598-3p, miR-338-3p, miR-4510, miR-3074-5p, miR-145a-3p, miR-2330-3p, miR-214, miR-664a, miR-130b-5p, miR-424-5p, miR-874-5p, miR-2285j, miR-665, miR-320e, miR-151-3p, miR-503-5p, miR-103, novel\_116, miR-194-3p, miR-103a-3p, miR-3955-5p, miR-30b-3p, miR-16b, miR-497-5p, miR-2113, miR-374b-3p, miR-22-3p, miR-539-3p, miR-130b-5p, miR-380-5p, miR-668-3p, miR-483-3p, miR-378a-5p, miR-466f-3p, miR-193a-3p, miR-660, miR-582, miR-503-5p, miR-2285v, miR-32, miR-411b-3p, miR-670-3p, miR-6535, miR-320c, miR-3074-5p, miR-320b, miR-107, miR-195a-5p, miR-1a-1-5p, novel\_120, novel\_101, miR-495-3p, miR-193b-3p, miR-92a-3p, miR-147-5p, miR-421-5p, miR-22-5p, miR-28c, miR-208a-3p, miR-33a-3p, miR-16a, miR-483-3p, miR-9-5p, miR-322-5p, novel\_121, miR-134-5p, miR-582-3p, miR-6517, miR-134, miR-380-5p, miR-92b-3p, miR-28b, miR-181a-2-3p, miR-3064-5p, miR-1a-2-5p, miR-450a-2-3p, miR-200a-3p, novel\_96, miR-92a-3p, miR-153-3p, miR-376c-5p, novel\_103, miR-1434-3p, miR-653, miR-130a-5p, miR-23b-3p, miR-153, miR-211, miR-211-5p, miR-23a-3p, miR-329-5p, miR-2331-3p, miR-329a-5p, miR-188-5p, miR-34a-5p, miR-2889, miR-30b-3p, miR-1260b, miR-2426, miR-188-3p, miR-5703, miR-758-3p, miR-30b-3p, miR-532-3p, miR-328-3p, miR-20b, miR-339-5p, novel\_79, miR-106a, miR-34b-5p, miR-214-3p, miR-106a, miR-378a-5p, miR-17-5p, miR-106b-5p, miR-106a-5p, miR-339a, miR-1260a, miR-3065-3p, novel\_39, miR-4532, miR-758-3p, miR-20a, miR-106a-5p, miR-20b-5p, miR-9851-3p, miR-1827, miR-6395, miR-1291, miR-339b, miR-93-5p, miR-17-5p, miR-677, miR-204-3p, miR-4443, miR-3957, miR-34c-5p, miR-34b, miR-3065-3p, miR-211-5p, miR-615-5p, miR-3957-5p, miR-204-5p, miR-34c, miR-132-5p, miR-20a-5p, miR-449a, miR-7705, miR-2428, miR-211, miR-93, miR-1260b, miR-214, miR-2447

LRRC1 ENSOARGO(leucine)

KCTD1 ENSOARGO(potassium)

TRIM25 ENSOARGO(tripartite)

|        |                     |                                                                                                                                                                                                                                                                                                                                                                                                                                                                                                                                                                                                                                                                                                                                                                                                                                                                                                                                                                                                                                                                                                                                                                                                                                                                                                                                                                                                                                                                                                                                   |
|--------|---------------------|-----------------------------------------------------------------------------------------------------------------------------------------------------------------------------------------------------------------------------------------------------------------------------------------------------------------------------------------------------------------------------------------------------------------------------------------------------------------------------------------------------------------------------------------------------------------------------------------------------------------------------------------------------------------------------------------------------------------------------------------------------------------------------------------------------------------------------------------------------------------------------------------------------------------------------------------------------------------------------------------------------------------------------------------------------------------------------------------------------------------------------------------------------------------------------------------------------------------------------------------------------------------------------------------------------------------------------------------------------------------------------------------------------------------------------------------------------------------------------------------------------------------------------------|
| ESRP1  | ENSOARGO( epitheli  | <p>novel_83, miR-2284h-5p, miR-149-5p, novel_121, miR-23b-3p, miR-200b, miR-6516-5p, miR-23c, miR-429-3p, miR-200b-3p, miR-496, miR-3962, miR-5703, miR-2300b-3p, miR-2310, miR-654-3p, miR-369-3p, miR-23a-3p, miR-181a-2-3p, miR-452-5p, miR-2898, miR-200c-3p, miR-365b-5p, miR-200c, miR-2285p, miR-204-3p, miR-6516, miR-582-5p, miR-126b-5p, miR-496-3p, miR-503-3p, miR-1814c, miR-450b-3p, miR-23b, miR-129b-5p, miR-655, miR-301, miR-365a-5p, miR-1296-5p, miR-3074-2-3p, miR-2447, miR-145a-3p, miR-147-5p, miR-655-3p, miR-382-5p, miR-2440</p>                                                                                                                                                                                                                                                                                                                                                                                                                                                                                                                                                                                                                                                                                                                                                                                                                                                                                                                                                                       |
| CEP126 | ENSOARGO( centrosol | <p>miR-1248, miR-154b-3p, miR-136-5p, miR-200a-5p, miR-450a-1-3p, miR-148a-3p, miR-2483-3p, miR-154a-3p, miR-487a-3p, miR-154-3p, miR-628-3p, miR-450b-3p, novel_27, miR-142a-5p, miR-3059-5p, miR-590-3p, miR-1388-5p, miR-145a-5p, miR-23b-5p, miR-450c-3p, miR-143-5p, miR-6529a, miR-345-3p, miR-2459, miR-9788-3p, miR-450a-1-3p, miR-3431, miR-148b-3p, miR-142-5p, miR-487a-3p, miR-383-5p, miR-145b, miR-222-5p, miR-665, miR-31-5p, miR-3955-5p, miR-152-3p, miR-2411-3p, miR-345-3p, miR-6119-5p, let-7j, miR-539-3p, miR-376a-5p, miR-664b-3p, miR-421-5p, miR-487a, miR-216c-5p, miR-30b-3p, miR-125b-2-3p, miR-6529a, miR-484, miR-378b, miR-296-5p, miR-143-5p, miR-2284aa, miR-3120-5p, miR-378c, miR-544a, miR-2300a-5p, miR-409b, miR-9788-3p, miR-2285e, miR-320b, novel_115, miR-1306-5p, novel_103, miR-326, miR-542-5p, miR-3085-3p, miR-3955-3p, miR-2330-5p, miR-494-3p, miR-424-5p, miR-106a-5p, miR-758-3p, miR-30c-1-3p, novel_94, miR-664b, miR-3064-5p, miR-10b, miR-378e, miR-489, miR-769-5p, miR-2285y, miR-107-5p, miR-4726-5p, miR-2285f, miR-3059-5p, novel_60, miR-2904, miR-1197-5p, miR-5703, miR-378d, miR-4429, miR-548e-3p, miR-199a-3p, miR-148b-3p, miR-222-5p, miR-15a-5p, miR-125b, miR-185-3p, miR-542-5p, miR-34b-5p, miR-221-5p, miR-30b-3p, miR-106a, miR-320d, miR-2284m, miR-760-3p, miR-20a, miR-2887, miR-125b-2-3p, miR-21a-3p, novel_99, miR-2312, miR-3065-3p, miR-532-5p, miR-378a-3p, miR-221-5p, miR-22-3p, miR-544-3p, miR-193b-3p, miR-6130, miR-324-3p, miR-29b-</p> |
| NUP214 | ENSOARGO( nucleopo  | <p>2-5p, miR-208b-5p, miR-424-5p, miR-450b-3p, miR-17-3p, miR-1271, miR-3074-2-3p, miR-539-5p, miR-378c, miR-4510, miR-338-3p, miR-206-3p, miR-145a-5p, miR-1434-3p, miR-7862, miR-29b, miR-30b-3p, miR-219a-1-3p, miR-544b, miR-2285g, miR-185-5p, miR-503-5p, miR-17-5p, miR-224-5p, miR-503-5p, miR-1343-5p, miR-125a-5p, miR-466f-3p, miR-363-5p, miR-382, miR-2483-5p, miR-130b-5p, miR-345-5p, miR-2285ab, miR-2387, miR-195a-5p, miR-1291, miR-320b, miR-378b, miR-2404, miR-670-3p, miR-34b, miR-29a-3p, miR-34c, miR-16a, miR-502-5p, miR-15a, miR-6529b, miR-20a-5p, miR-203b-5p, miR-147-5p, miR-128-1-5p, miR-17-3p, miR-542-5p, miR-449a, miR-326-3p, miR-2428, miR-211, miR-24-3p, miR-29d-3p, miR-345-3p, miR-134, miR-582-3p, miR-545-5p, miR-1271-5p, miR-378h, miR-30c-2-3p, miR-2285af, miR-543-5p, miR-2898, miR-17-3p, miR-191-3p, miR-29b-2-5p, miR-1, miR-4286, miR-376c-5p, miR-376b-5p, miR-3065-3p, miR-100-3p, miR-3154, miR-17-5p, miR-320a, miR-188-3p, miR-</p>                                                                                                                                                                                                                                                                                                                                                                                                                                                                                                                                     |
| LMNTD2 | ENSOARGO( lamin ta  | <p>miR-128-1-5p, miR-151-5p, miR-744-5p, miR-151b, miR-502-5p, miR-7977</p>                                                                                                                                                                                                                                                                                                                                                                                                                                                                                                                                                                                                                                                                                                                                                                                                                                                                                                                                                                                                                                                                                                                                                                                                                                                                                                                                                                                                                                                       |

|       |                   |                                                                                                                                                                                                                                                                                                                                                                                                                                                                                                                                                                                                                                                                                                                                                                                                                                                                                                                                                                                                                                                                                                                                                                                                                                                                                                                                                                                                                                                                                                                                                                                                                                                                                                                                                                                                                                                                                                                                                                                                                                             |
|-------|-------------------|---------------------------------------------------------------------------------------------------------------------------------------------------------------------------------------------------------------------------------------------------------------------------------------------------------------------------------------------------------------------------------------------------------------------------------------------------------------------------------------------------------------------------------------------------------------------------------------------------------------------------------------------------------------------------------------------------------------------------------------------------------------------------------------------------------------------------------------------------------------------------------------------------------------------------------------------------------------------------------------------------------------------------------------------------------------------------------------------------------------------------------------------------------------------------------------------------------------------------------------------------------------------------------------------------------------------------------------------------------------------------------------------------------------------------------------------------------------------------------------------------------------------------------------------------------------------------------------------------------------------------------------------------------------------------------------------------------------------------------------------------------------------------------------------------------------------------------------------------------------------------------------------------------------------------------------------------------------------------------------------------------------------------------------------|
| LMBR1 | ENSOARGO(limb dev | miR-371a-5p, novel_19, miR-1a-3p, miR-2904, miR-191-3p, miR-206, miR-574-5p, miR-1, miR-6527, miR-2284s, miR-361-3p, miR-206-3p, miR-9788-3p, miR-2428, novel_63, miR-100-3p, miR-125b-5p, novel_9, miR-126b-3p, novel_42, miR-16-5p, miR-1260b, miR-30e-5p, miR-345-5p, miR-874-3p, miR-542-5p, miR-2355-5p, miR-125a, miR-1271, miR-125a-3p, miR-30f, miR-127-5p, novel_127, miR-148b-5p, miR-192-3p, miR-1290, miR-30c, miR-299a-3p, miR-6517, miR-9-5p, miR-322-5p, miR-2284z, novel_121, miR-486-5p, miR-4324, miR-576-3p, miR-206, miR-2284w, miR-3065-5p, miR-412-3p, novel_68, miR-3074-5p, miR-3120-3p, miR-299b-3p, miR-374c-3p, miR-377-3p, miR-493-5p, miR-2285r, miR-432, miR-542-3p, miR-22-3p, miR-197-3p, miR-16b, miR-497-5p, miR-4508, miR-2284x, miR-340-3p, miR-3955-5p, miR-134-3p, miR-411-5p, miR-194-3p, miR-30e-3p, miR-30a-3p, miR-665, novel_74, miR-129-5p, miR-874-5p, miR-433-5p, miR-3074-5p, miR-214, miR-665-5p, miR-181c-5p, miR-2285c, miR-433-3p, miR-30d-5p, miR-345-5p, miR-543-3p, miR-30c-1-3p, miR-504-5p, miR-548o-3p, miR-216b-3p, miR-377-3p, miR-582-5p, miR-15b-5p, miR-30b, miR-210-5p, miR-2285p, miR-618, miR-503-5p, miR-345-3p, miR-380-3p, miR-143-3p, miR-30c-5p, miR-184-3p, miR-218-1-3p, miR-34a-5p, miR-18a-3p, miR-7859, miR-218-5p, miR-101-3p, miR-2440, miR-3968, miR-9-5p, miR-877-3p, novel_111, miR-1285-5p, miR-409-5p, miR-378j, miR-99b-5p, miR-504, miR-493-5p, miR-1983, miR-544-5p, miR-2285u, miR-378g, miR-25, miR-199a-3p, miR-16b, miR-214-3p, miR-103a-2-5p, miR-124a, miR-101b-3p, miR-2310, miR-1a-3p, miR-101c, miR-548w, miR-199b-3p, miR-1343-3p, miR-145b, miR-425-3p, miR-496-5p, miR-147a, miR-2459, miR-34c-3p, miR-370-5p, miR-135a-5p, miR-409-3p, miR-138-5p, miR-6128, miR-103b, miR-381-3p, miR-3154, miR-100-5p, miR-7144-5p, miR-1814c, miR-671-5p, miR-3957-5p, miR-370-3p, miR-34c-5p, miR-374c-3p, miR-3965, miR-3957, miR-1260a, miR-99a, miR-30c-2-3p, miR-17-3p, miR-2898, miR-181b-5p, miR-543-5p, miR-30a-3p, miR-1, miR-181a-2-3p, miR- |
| GCLC  | ENSOARGO(glutamat |                                                                                                                                                                                                                                                                                                                                                                                                                                                                                                                                                                                                                                                                                                                                                                                                                                                                                                                                                                                                                                                                                                                                                                                                                                                                                                                                                                                                                                                                                                                                                                                                                                                                                                                                                                                                                                                                                                                                                                                                                                             |

miR-505-3p, miR-383-5p, miR-15a-5p, novel\_133, miR-215-5p, miR-2904, miR-1197-5p, miR-188-3p, miR-5703, miR-4429, miR-19b-3p, miR-130a-5p, miR-125b-2-3p, miR-2411, miR-216a-5p, miR-320d, miR-760-3p, miR-34b-5p, miR-221-5p, miR-140-5p, miR-378a-3p, miR-221-5p, miR-3065-3p, miR-370-5p, miR-192-5p, miR-139-5p, miR-204-3p, miR-22-3p, miR-155-5p, miR-3613-5p, miR-18a-5p, miR-378c, miR-2330-3p, miR-3074-2-3p, miR-320e, miR-29b-2-5p, miR-17-3p, miR-155-5p, miR-664a, miR-708-5p, miR-424-5p, miR-222-5p, miR-500-5p, miR-216a-3p, miR-378b, miR-30b-3p, miR-378c, miR-2426, miR-2330-5p, miR-424-5p, miR-320b, miR-326, miR-5126, miR-2957, miR-3085-3p, miR-3064-5p, miR-452-3p, miR-20a-3p, miR-378e, miR-3082-5p, miR-361-3p, miR-154a, miR-30b-5p, miR-371a-5p, miR-2284q, miR-376a-5p, miR-2411-5p, miR-378h, miR-545-5p, miR-582-3p, miR-214-5p, miR-345-3p, miR-134, miR-30a-3p, miR-29b-2-5p, miR-3065-3p, miR-2285af, miR-17-3p, miR-370-3p, miR-215-5p, miR-615-5p, miR-34c-5p, miR-374c-3p, miR-488-3p, miR-3154, miR-18a, miR-320a, miR-10a-3p, miR-7144-5p, miR-1814c, miR-485-5p, miR-1306-5p, miR-378c, miR-551b-3p, miR-410-5p, miR-34c-3p, miR-370-5p, miR-331-3p, miR-28-5p, miR-130a-3p, miR-432-5p, miR-653, miR-1285, miR-1434-3p, miR-374b-3p, miR-30b-3p, miR-744-5p, miR-345-5p, miR-330-3p, miR-1343-5p, miR-655-5p, miR-320b, miR-34b, miR-18b, miR-450b-3p, miR-19a-3p, miR-9851-3p, miR-135b-5p, miR-505-3p, miR-195a-5p, miR-376a-2-5p, miR-219b-3p, novel\_101, miR-1193, miR-17-3p, miR-371b-3p, miR-326-3p, miR-449a, miR-2428, miR-15a, miR-3613, miR-16a, miR-34c, novel\_1, miR-199c, miR-212-5p, miR-7859, miR-1247-5p, miR-378i, miR-378a-3p, miR-493-3p, miR-16-1-3p, miR-664-5p, miR-34a-5p, miR-10a-3p, miR-195a-3p, miR-181b-1-3p, miR-30b, novel\_17, miR-422a, miR-345-3p, miR-2484, miR-548w, miR-1343-3p, miR-2319b, miR-421, miR-539-5p, miR-433-3p, miR-1285, miR-7975, miR-2319a, miR-539-5p, miR-1a-1-5p, novel\_27, miR-503-3p, miR-6525, miR-1-5p, miR-1a-2-5p, miR-6536

THADA ENSOARGO(thyroid) miR-3431, miR-885-3p, miR-1827, novel\_99, miR-22-5p, miR-885-3p

GSPT1 ENSOARGO(G1 to S) miR-452-3p, miR-504-5p, miR-29a-3p, miR-378g, miR-301a-3p, miR-361-3p, miR-504, miR-19a-3p, miR-671-5p, miR-369-5p, miR-214, miR-29c-3p, miR-24-3p, miR-1197-3p, miR-361-3p, miR-301b-3p, miR-28c, miR-2440, miR-29b-3p, miR-551b-3p, miR-1307-5p, miR-29a, miR-3432a, miR-874-5p, miR-454-3p, miR-2300a-5p, miR-130a-3p, miR-3431, miR-134-3p, miR-210-3p, miR-2904, miR-29d-3p, miR-19b-3p, miR-142-3p, miR-1388-5p, miR-29b, miR-744-5p, miR-4508, miR-28b, miR-5126, miR-582, miR-210-5p, miR-185-3p, miR-2285v, novel\_19, miR-130b-3p, miR-543-5p, miR-214-3p, miR-21-3p

FAM206A ENSOARGO(family w) miR-452-3p, miR-504-5p, miR-29a-3p, miR-378g, miR-301a-3p, miR-361-3p, miR-504, miR-19a-3p, miR-671-5p, miR-369-5p, miR-214, miR-29c-3p, miR-24-3p, miR-1197-3p, miR-361-3p, miR-301b-3p, miR-28c, miR-2440, miR-29b-3p, miR-551b-3p, miR-1307-5p, miR-29a, miR-3432a, miR-874-5p, miR-454-3p, miR-2300a-5p, miR-130a-3p, miR-3431, miR-134-3p, miR-210-3p, miR-2904, miR-29d-3p, miR-19b-3p, miR-142-3p, miR-1388-5p, miR-29b, miR-744-5p, miR-4508, miR-28b, miR-5126, miR-582, miR-210-5p, miR-185-3p, miR-2285v, novel\_19, miR-130b-3p, miR-543-5p, miR-214-3p, miR-21-3p

ARHGEF7 ENSOARGO(Rho guan)

miR-31-5p, miR-122-3p, miR-103a-3p, miR-130a-3p, miR-377-5p, miR-26b-3p, miR-412-5p, novel\_116, miR-6238, miR-103, miR-7b-5p, miR-1843b-5p, miR-1434-3p, miR-450c-3p, miR-194-5p, novel\_23, miR-30b-3p, miR-380-3p, miR-16b, miR-2284x, miR-6240, miR-7-5p, miR-582, miR-330-3p, miR-194a, miR-124-5p, miR-466f-3p, miR-329-5p, miR-26b-5p, miR-7-1-3p, miR-2404, miR-299b-3p, miR-148a-3p, miR-3970, miR-3065-5p, miR-376b-3p, miR-3591-3p, miR-450b-3p, miR-107, miR-2285k, miR-6516-3p, miR-195a-5p, miR-335-5p, miR-24-3p, miR-326-3p, miR-374c-5p, miR-301b-3p, miR-2428, miR-133a-5p, miR-16a, miR-6119-3p, miR-379-3p, miR-656-5p, miR-299a-3p, miR-429-3p, miR-322-5p, miR-24-2-5p, miR-6516-5p, miR-450a-1-3p, miR-545-5p, miR-30a-5p, miR-330-5p, miR-200b-3p, miR-2385-3p, miR-30a-3p, miR-3064-5p, miR-376b-3p, miR-205-5p, miR-200c, miR-217, miR-200c-3p, miR-107, miR-152-3p, miR-574-5p, miR-2285aa, miR-769, miR-30e-5p, miR-381-3p, miR-301, let-7g-3p, miR-23a-5p, miR-1248, miR-374b, miR-16-5p, miR-193a-5p, miR-144-5p, miR-323-3p, miR-374a-3p, miR-34c-3p, miR-2332, miR-31-3p, miR-374b-3p, miR-1343-3p, miR-330-3p, miR-376b-3p, miR-455-3p, miR-126a-5p, miR-301b-5p, miR-30b-3p, miR-2426, miR-101c, miR-124a, miR-424-5p, miR-101b-3p, miR-33a-5p, miR-8485, miR-199a-3p, miR-326, miR-16b, miR-3085-3p, miR-130b-3p, miR-3064-5p, miR-452-3p, miR-10b, miR-374b-5p, miR-2285u, miR-203-3p, miR-376d, miR-454-5p, miR-381-3p, miR-378j, miR-299b-5p, miR-504, miR-376a-3p, miR-194b-5p, miR-219a-5p, miR-877-3p, miR-154a, miR-218-5p, miR-101-3p, miR-2440, miR-769-5p, miR-301a-5p, miR-499a-5p, miR-335, miR-374a-3p, miR-490-5p, miR-548e-3p, miR-1b-3p, miR-30d-3p, miR-7859, miR-487a-3p, miR-148b-3p, miR-15a-5p, miR-222-5p, miR-200b, miR-199a-3p, miR-2366, miR-1246, miR-2300b-3p, miR-2904, miR-124-3p, miR-188-3p, miR-1197-5p, miR-217-5p, miR-



MRPS22

ENSOARGO(mitochon

miR-134-5p, miR-450a-1-3p, novel\_121, miR-758-5p, miR-29d-3p, miR-345-3p, miR-134, miR-1290, let-7a-2-3p, novel\_39, miR-1271-3p, miR-490-3p, miR-217, miR-543-5p, miR-6536, miR-331-5p, miR-374c-3p, miR-3154, miR-320a, miR-2448-3p, miR-331-5p, miR-7144-5p, miR-1814c, miR-671-5p, miR-144-5p, miR-103b, miR-29b-3p, miR-2284k, miR-494-5p, miR-2332, miR-204-5p, miR-134-5p, miR-486b-3p, miR-28-5p, miR-331-5p, miR-134-3p, miR-3431, miR-450c-3p, miR-873a-5p, miR-1434-3p, miR-188-5p, miR-2284x, miR-29b, miR-30b-3p, miR-219a-1-3p, let-7a-2-3p, miR-2285r, miR-432-3p, miR-432-3p, miR-2411-3p, miR-452-5p, miR-660, miR-329-5p, miR-320c, miR-29a-3p, miR-2285ab, miR-376a-2-5p, miR-6516-3p, novel\_101, miR-29c-3p, miR-2284w, miR-2428, miR-211, miR-323c, miR-33a-3p, miR-421-5p, miR-625-3p, miR-147-5p, miR-29a, miR-532-3p, miR-616-3p, miR-1197-5p, miR-217-5p, miR-5703, miR-2408, miR-4429, miR-33b-3p, miR-329a-5p, miR-486-3p, miR-2432, miR-421-5p, miR-500a-5p, miR-345-3p, novel\_17, miR-2284m, miR-320d, miR-532-5p, miR-660-5p, miR-548o-3p, miR-487b-5p, miR-450a-1-3p, miR-186-5p, miR-2312, miR-2330-3p, miR-214, miR-3074-2-3p, miR-433-5p, miR-539-5p, miR-6525, miR-665, miR-320e, miR-2285j, miR-708-5p, miR-450b-3p, miR-487b-5p, miR-6516-3p, miR-455-3p, miR-216a-3p, miR-126a-5p, miR-539-5p, miR-30b-3p, miR-3962, miR-2284r, miR-301b-5p, miR-101c, miR-1388-5p, miR-382-3p, miR-2310, miR-320b, miR-214-3p, miR-3955-3p, miR-211-5p, miR-20a-3p, miR-203-3p, miR-144-5p, miR-378g, miR-378j, miR-335-3p, miR-9-3p, miR-2285f, miR-2284j, miR-3059-5p, novel\_60, miR-3956-3p, miR-877-3p, miR-301a-5p, miR-101-3p, miR-1843a-3p, miR-2284q, miR-3968, miR-3958-3p

miR-182-5p, miR-370-5p, miR-21-3p, miR-30c-1-3p, miR-504-5p, miR-221-5p, miR-151b, miR-155-5p, miR-15b-5p, miR-204-3p, miR-6130, miR-377-3p, miR-544-3p, miR-487b-5p, miR-129b-3p, miR-625-5p, miR-543-3p, miR-345-5p, miR-2312, miR-3074-2-3p, miR-129-2-3p, miR-4510, miR-539-5p, miR-181c-5p, miR-224-5p, miR-346, miR-142a-5p, miR-132-5p, miR-151-3p, miR-15b-3p, miR-129-5p, miR-208b-5p, miR-424-5p, miR-4492, miR-155-5p, miR-17-3p, miR-487b-5p, miR-3600, miR-548e-3p, miR-151-5p, novel\_83, miR-532-3p, miR-200b, miR-15a-5p, miR-23c, miR-7859, miR-23b-3p, miR-140-3p, miR-188-3p, miR-2366, miR-1246, miR-2408, miR-2300b-3p, novel\_133, miR-133a-3p, miR-4429, novel\_73, miR-345-3p, miR-195a-3p, miR-216c-5p, miR-2411, miR-181b-1-3p, miR-125b-2-3p, miR-345-3p, miR-216a-5p, miR-324-3p, miR-210-5p, miR-299-3p, miR-221-5p, miR-466i-5p, miR-320d, miR-452-3p, miR-1185-2-3p, miR-4443, miR-203-3p, miR-129b-5p, miR-1983, miR-335-3p, miR-504, miR-452-5p, miR-181d-5p, miR-2285f, miR-2447, miR-361-3p, miR-371a-5p, miR-2285y, miR-2440, miR-490-5p, miR-3964, miR-2285t, miR-3968, miR-145b, miR-181b-2-3p, miR-5010-3p, miR-548w, miR-330-3p, miR-151a-3p, miR-421, miR-1185-3p, miR-2459, miR-455-3p, miR-142-5p, miR-539-5p, miR-125b-2-3p, miR-323b, miR-1839-5p, miR-16-2-3p, miR-544a, miR-33a-5p, miR-23a-3p, let-7c-3p, miR-424-5p, miR-382-3p, miR-8485, miR-30c-1-3p, miR-16b, miR-182-5p, miR-323b-3p, miR-431-5p, miR-326, miR-320b, miR-487b-5p, miR-370-3p, miR-2285aa, miR-3068-3p, miR-133c, miR-324-5p, miR-331-5p, miR-320a, miR-23b, miR-137-3p, miR-301, miR-2448-3p, miR-381-3p, miR-671-5p, miR-3074-1-3p, miR-7144-5p, miR-345-5p, let-7g-3p, miR-2318, miR-767, miR-16-5p, miR-365a-5p, miR-374a-3p, miR-1260b, miR-3969, miR-409-3p, miR-26c, miR-370-5p, miR-494-5p, miR-5100, miR-29b-3p, miR-124-5p, miR-374b-3p, miR-767-5p, novel\_9, miR-131, miR-129a, miR-193b-3p, miR-1839-3p, miR-541-3p, miR-4510, miR-4492, miR-138-5p, miR-3968, miR-541-5p, miR-504-5p, miR-6130, miR-193b-3p, miR-885-3p, miR-493-5p, miR-504, miR-329a, miR-4286, miR-493-5p, miR-1839-3p, miR-574-3p, miR-2411, miR-185-3p, miR-362-3p, miR-7-5p, miR-193a-3p, novel\_96, miR-491-5p, miR-532-3p, miR-2284z, miR-2411-5p, miR-2904, miR-362-3p, miR-7b-5p, miR-541, miR-223-3p, miR-329-3p, miR-21b, miR-219a-1-3p, miR-138, miR-885-3p, miR-362-3p

IKBKAP ENSOARGO inhibitor

CLSTN1 ENSOARGO calynte

miR-6516-5p, novel\_121, miR-582-3p, miR-1290, miR-3591-5p, miR-1343-5p, miR-582-3p, let-7a-2-3p, miR-105-2, miR-155-5p, miR-29b-2-5p, miR-30a-3p, miR-199a-5p, miR-200a, miR-1957a, miR-3065-3p, miR-29a-5p, miR-6119-5p, miR-2285af, miR-217, miR-30f, miR-181b-5p, miR-1a-2-5p, miR-28-3p, miR-450a-2-3p, miR-17-3p, miR-200a-3p, novel\_96, miR-3068-3p, miR-141-3p, miR-215-5p, miR-2285aa, miR-374c-3p, miR-223-5p, miR-199a-5p, miR-30e-5p, miR-488-3p, miR-362-5p, miR-17-5p, miR-137-3p, miR-200a-5p, let-7g-3p, miR-876-3p, miR-3074-1-3p, miR-20b-5p, miR-28a-3p, miR-6128, miR-374a-3p, miR-500b-5p, miR-323-3p, miR-135a-1-3p, miR-494-5p, novel\_63, miR-1-5p, miR-34c-3p, miR-409-3p, miR-144, novel\_9, miR-374b-3p, miR-26b-3p, miR-3535, miR-2284d, miR-411-5p, miR-181a-5p, miR-19b-2-5p, miR-653, miR-145a-5p, novel\_23, miR-374b-3p, miR-16-1-3p, miR-380-3p, miR-30b-3p, miR-7862, miR-6240, miR-493-5p, miR-101-5p, miR-22841, miR-654-3p, let-7a-2-3p, miR-224-5p, miR-17-5p, miR-105-5p, miR-330-3p, miR-197-5p, miR-378a-5p, miR-1343-5p, miR-329-5p, miR-374c-3p, miR-323a-5p, miR-181b-3p, miR-6535, miR-144-3p, miR-677, miR-1a-1-5p, miR-219b-3p, miR-17-3p, miR-2285x, miR-323c, miR-199b-5p, miR-2284w, miR-6402, miR-20a-5p, miR-502-5p, miR-33a-3p, novel\_1, miR-147-5p, miR-199c, miR-106a, miR-30d-3p, miR-3600, miR-7859, miR-616-3p, miR-199a-3p, miR-215-5p, miR-376a-5p, miR-1197-5p, miR-1193, miR-217-5p, miR-361-5p, miR-16-1-3p, miR-218-1-3p, miR-183-5p, miR-216c-5p, miR-195a-3p, miR-20a, miR-125b-2-3p, miR-664b-3p, miR-376a-5p, miR-29b-1-5p, miR-143-3p, miR-380-3p, miR-210-5p, miR-216a-5p, miR-500a-5p, miR-760-3p, miR-106a, miR-1277-5p, miR-140-5p, miR-532-5p, miR-552-3p, miR-3065-3p, miR-656-3p, miR-323-5p, miR-139-5p, miR-6516, miR-582-5p, miR-155-5p, miR-877-5p, miR-487b-5p, miR-433-3p, miR-655, let-7c-3p, novel\_99, miR-582-5p, miR-

TCOF1 ENSOARGO(Treacher) miR-29b, miR-30b-3p, miR-2284ab, miR-544b, miR-185-5p, miR-2284d, miR-26b-3p, miR-339-5p, miR-1343-5p, miR-196b-5p, miR-377-3p, miR-345-5p, miR-539-3p, miR-668-3p, miR-493-5p, miR-378f, miR-450b-3p, miR-677, miR-144-3p, miR-29a-3p, miR-411b-3p, miR-3074-5p, miR-378b, miR-6123, miR-29a, novel\_1, miR-502-5p, miR-199b-5p, miR-326-3p, miR-1193, miR-29c-3p, miR-17-3p, miR-330-5p, miR-29d-3p, miR-1343-5p, miR-196a-5p, miR-2284z, miR-378h, miR-505-5p, novel\_79, miR-543-5p, miR-17-3p, miR-339a, miR-205-5p, miR-199a-5p, miR-2478, miR-345-5p, miR-3154, miR-23b, miR-2284n, miR-154b-5p, miR-199a-5p, miR-615-5p, miR-598-3p, miR-2355-5p, miR-487a-3p, miR-486b-3p, miR-592, miR-144, miR-100-3p, miR-370-5p, miR-29b-3p, miR-378c, miR-2284v, miR-21b, miR-2284aa, miR-544a, miR-378c, miR-30b-3p, miR-378b, miR-296-5p, miR-484, miR-181b-2-3p, novel\_4, novel\_78, miR-2300a-5p, miR-103a-2-5p, miR-199b-5p, miR-29b-1-5p, novel\_103, miR-326, miR-3187-3p, miR-193a, miR-8485, miR-378d, miR-744-3p, miR-23a-3p, miR-2330-5p, miR-493-5p, miR-136-5p, miR-3963, miR-199b-5p, miR-361-3p, miR-378e, miR-154-3p, miR-107-5p, miR-101-3p, novel\_82, miR-423-5p, miR-361-3p, miR-2447, miR-33b-3p, miR-378a-3p, miR-378i, miR-151-5p, miR-23c, miR-487a-3p, miR-7859, miR-23b-3p, miR-485-3p, miR-1b-3p, miR-1277-5p, miR-2284m, miR-422a, miR-185-3p, miR-196a-3p, miR-486-3p, miR-29b-1-5p, miR-487a, miR-216c-5p, miR-582-5p, miR-1827, miR-154b-3p, miR-339b, miR-345-5p, let-7g-3p, miR-598-3p, miR-500a-3p, miR-151b, miR-877-5p, miR-204-3p, miR-216b-5p, miR-6130, miR-377-3p, miR-544-3p, miR-582-5p, miR-216b-3p, miR-154a-3p, miR-370-5p, miR-378a-3p, miR-500, miR-17-3p, miR-665, miR-6134, miR-338-3p, miR-3184-5p, miR-4510, miR-3074-5p, miR-378c

miR-9-3p, miR-361-3p, miR-877-3p, novel\_111, miR-9-5p, miR-452-5p, miR-3059-5p, novel\_60, miR-2447, miR-3956-3p, miR-2284q, miR-4726-5p, miR-2285y, miR-301a-5p, miR-2285n, let-7d-5p, miR-203-3p, miR-4443, miR-378e, miR-378g, miR-489, miR-2285u, miR-499b-5p, miR-7977, miR-2319b, miR-9-3p, miR-299b-5p, miR-504, miR-361-3p, miR-378d, miR-23a-3p, miR-1388-3p, miR-124a, let-7a-5p, let-7e, novel\_124, miR-130b-3p, miR-2957, miR-320b, miR-5126, novel\_103, miR-326, miR-9788-3p, miR-1298-3p, novel\_4, miR-105-1, miR-1343-3p, miR-330-3p, miR-378c, miR-1388-5p, miR-299a-5p, miR-450b-5p, miR-7857, miR-30b-3p, miR-296-5p, miR-378b, miR-2284r, miR-301b-5p, miR-143-5p, miR-4791, let-7b-5p, miR-6525, miR-539-5p, let-7b, miR-378c, miR-145a-3p, miR-3074-5p, miR-129-2-3p, miR-3184-3p, miR-500, miR-4492, miR-874-5p, miR-454-3p, miR-665, miR-3604, let-7f, miR-204-3p, let-7i-5p, miR-2284s, miR-301a-3p, miR-3065-3p, miR-378a-3p, miR-2331-3p, miR-504-5p, miR-543-3p, miR-625-5p, miR-1827, miR-133b-3p, miR-345-5p, miR-339b, miR-500a-3p, miR-21a-3p, miR-486-3p, miR-143-3p, miR-130a-5p, miR-377-5p, let-7k, miR-320d, miR-98-5p, miR-92a-1-5p, miR-185-3p, miR-422a, miR-345-3p, miR-208b-3p, novel\_17, miR-671-3p, miR-532-3p, miR-23b-3p, miR-23c, miR-378d, miR-493-3p, miR-4429, miR-124-3p, miR-188-3p, miR-1197-5p, miR-378a-3p, miR-5703, novel\_133, miR-378i, miR-193b-5p, miR-1961, miR-2300b-3p, miR-326-3p, miR-301b-3p, miR-2428, miR-24-3p, miR-1307-3p, let-7i, miR-1247-3p, miR-208a-3p, miR-28c, miR-6535, miR-320c, miR-146b-3p, miR-670-3p, miR-655-5p, miR-3074-5p, miR-378f, let-7e-5p, miR-150-5p, miR-3141, miR-345-5p, miR-2285r, miR-363-5p, miR-6240, miR-452-5p, miR-330-3p, miR-365b-5p, miR-3141, miR-197-5p, miR-105-5p, novel\_51, miR-455-5p, miR-2411-3p, novel\_116, miR-149-5p, miR-132-5p, miR-3535, let-7g-5p, miR-134-3p, miR-185-3p, miR-411, miR-500a-3p, miR-488-3p, miR-1827, miR-582-5p, miR-2312, miR-141-3p, miR-552-3p, miR-21-3p, miR-3065-3p, miR-32-3p, miR-548o-3p, miR-216b-5p, miR-139-5p, miR-656-3p, miR-582-5p, miR-34c-5p, miR-377-3p, miR-144, miR-135a-1-3p, miR-1-5p, miR-592, miR-191-5p, miR-500, miR-425-5p, miR-338-3p, miR-6525, miR-191, miR-3591-5p, miR-34a-5p, miR-105-2, miR-582-3p, miR-411-3p, miR-493-3p, miR-485-3p, miR-3600, miR-548e-3p, miR-2284z, miR-24-2-5p, miR-487a-3p, miR-7859, miR-125a-3p, miR-200a-3p, miR-543-5p, miR-34b-5p, miR-1a-2-5p, miR-127-5p, miR-2898, miR-450a-2-3p, miR-329a-5p, miR-216c-5p, miR-143-3p, miR-3065-3p, miR-200a, miR-125b-2-3p, miR-421-5p, miR-24-2-5p, miR-3591-3p, miR-381-3p, miR-140-5p, miR-2285ab, miR-329-5p, miR-378b, miR-24-1-5p, miR-139-5p, miR-677, miR-144-3p, miR-34b, miR-3596, miR-371a-5p, miR-485-3p, miR-34c, miR-101-3p, miR-2440, miR-656-5p, miR-22-5p, miR-379-3p, novel\_1, miR-3968, miR-2285f, miR-1a-1-5p, miR-212-3p, miR-32-3p, miR-2284w, novel\_27, miR-449a, miR-361-3p, miR-374b-3p, miR-1434-3p, miR-4791, miR-2284aa, miR-330-3p, miR-105-1, miR-6238, miR-185-5p, miR-3535, miR-105-5p, miR-330-3p, miR-377-3p, miR-744-3p, miR-628-5p, miR-363-5p, miR-382-3p, miR-6240, miR-101b-3p, miR-1b-5p, miR-539-3p, miR-193a, miR-2285r

HOXB1

ENSOARGO(homeobox

TTK

ENSOARGO(TTK prot

|       |                    |                                                                                                                                                                                                                                                                                                                                                                                                                                                                                                                                                                                                                                                                                                                                                                                                                                                                                                                                                                                                                                                                                                                                                                                                                                                                                                                                                                                                                                 |
|-------|--------------------|---------------------------------------------------------------------------------------------------------------------------------------------------------------------------------------------------------------------------------------------------------------------------------------------------------------------------------------------------------------------------------------------------------------------------------------------------------------------------------------------------------------------------------------------------------------------------------------------------------------------------------------------------------------------------------------------------------------------------------------------------------------------------------------------------------------------------------------------------------------------------------------------------------------------------------------------------------------------------------------------------------------------------------------------------------------------------------------------------------------------------------------------------------------------------------------------------------------------------------------------------------------------------------------------------------------------------------------------------------------------------------------------------------------------------------|
|       |                    | miR-30c-2-3p, miR-16b, miR-194a, novel_124, miR-25-5p, miR-21-3p, miR-424-5p, miR-30c-1-3p, miR-200a, miR-3065-3p, miR-3187-3p, miR-484, miR-194-5p, miR-16b, miR-544a, miR-497-5p, miR-378d, miR-744-5p, miR-26b-3p, miR-322-5p, miR-1298-3p, miR-                                                                                                                                                                                                                                                                                                                                                                                                                                                                                                                                                                                                                                                                                                                                                                                                                                                                                                                                                                                                                                                                                                                                                                             |
| SNX29 | ENSOARGO0 sorting  | :15a-5p, miR-544b, miR-15a, miR-370-5p, miR-16a, miR-132-5p, miR-135a-5p, miR-424-5p, miR-3964, miR-16-5p, miR-194b-5p, miR-1193, miR-1307-3p, miR-412-3p, miR-1827, miR-135b-5p, miR-195a-5p, miR-1983, miR-30c-1-3p, miR-3065-3p, miR-370-5p, miR-615-5p, miR-544-3p, miR-15b-5p, miR-31-5p, miR-3431, miR-544b, miR-181a-5p, novel_23, miR-380-3p, miR-16-1-3p, miR-2284x, miR-380-5p, miR-493-5p, let-7f-2-3p, let-7f-2-3p, let-7a-2-3p, miR-146a, miR-125a-5p, miR-193a-3p, novel_68, miR-329-5p, miR-378b, miR-3120-3p, miR-144-3p, miR-6535, miR-677, miR-181b-3p, miR-148a-3p, miR-3065-5p, miR-7975, miR-146b-5p, miR-378f, miR-6516-3p, miR-335-5p, miR-193b-3p, miR-323c, miR-24-3p, miR-142b, novel_87, miR-379-3p, novel_1, miR-203b-5p, miR-656-5p, miR-22-5p, miR-147-5p, miR-429-3p, miR-6517, miR-758-5p, miR-378h, miR-2411-5p, miR-582-3p, novel_121, miR-3591-5p, miR-1290, miR-411-3p, miR-200b-3p, let-7a-2-3p, miR-3529-3p, miR-495-5p, miR-30a-3p, miR-380-5p, miR-450c-5p, miR-2285af, miR-125a-3p, miR-200c, miR-6119-5p, miR-217, miR-6536, miR-127-5p, miR-181b-5p, miR-200c-3p, miR-200a-3p, novel_96, miR-152-3p, miR-598-3p, miR-141-3p, miR-125a, miR-331-5p, miR-365a-3p, miR-154b-                                                                                                                                                                                                            |
| SRP54 | ENSOARGO0 signal r | 5p, miR-2448-3p, miR-3154, miR-23b, miR-10b-3p, let-7g-3p, miR-3074-1-3p, miR-374b, miR-378c, miR-135a-1-3p, miR-125b-5p, novel_9, miR-548w, miR-1343-3p, miR-181b-2-3p, miR-142-5p, miR-421, miR-126a-5p, miR-484, miR-378b, miR-1388-5p, miR-378c, miR-544a, miR-101c, miR-3120-5p, miR-494-3p, miR-382-3p, miR-23a-3p, miR-744-3p, miR-33a-5p, miR-378d, miR-193a, miR-491-5p, miR-1185-5p, miR-3955-3p, miR-146b, miR-541-5p, miR-374b-5p, miR-378e, miR-7857-3p, miR-489, miR-1185-2-3p, miR-493-5p, miR-212-3p, miR-181d-5p, miR-452-5p, miR-8095, miR-628-3p, miR-335, miR-450a-5p, miR-548e-3p, miR-3600, miR-7859, miR-23b-3p, miR-23c, miR-222-5p, miR-200b, miR-148b-3p, miR-378i, miR-2300b-3p, miR-1197-5p, miR-1193, miR-378a-3p, miR-217-5p, miR-16-1-3p, miR-133a-3p, miR-361-5p, miR-378d, miR-329a-5p, miR-216c-5p, miR-369-3p, miR-125b-2-3p, miR-181b-1-3p, miR-146a-5p, miR-2411, miR-2424, miR-2285a, miR-210-5p, miR-224-3p, miR-125b, miR-122a, miR-166i, miR-199b-5p, miR-877-3p, miR-24-3p, miR-1306-5p, miR-147-5p, miR-371a-5p, novel_87, novel_25, miR-199a-5p, miR-377-3p, miR-3082-5p, miR-3120-3p, miR-3064-5p, miR-20a-3p, miR-299b-5p, miR-21a-3p, miR-2387, miR-199b-5p, miR-199a-5p, miR-101-5p, miR-3064-5p, miR-452-5p, miR-153-3p, miR-199b-5p, miR-3085-3p, miR-205-5p, miR-196a-3p, miR-377-3p, novel_116, miR-616-3p, miR-153, miR-133b-5p, miR-378d, miR-2427, miR-1197-5p, miR-1285 |
| VWAS  | ENSOARGO0 von Will |                                                                                                                                                                                                                                                                                                                                                                                                                                                                                                                                                                                                                                                                                                                                                                                                                                                                                                                                                                                                                                                                                                                                                                                                                                                                                                                                                                                                                                 |
| PYGB  | ENSOARGO0 phosphor | miR-145a-3p, miR-378g, miR-361-3p, miR-134-3p, miR-320c, miR-320b, miR-320a, miR-1197-5p, miR-320e, miR-320d, novel_1, miR-4429, miR-133a-3p, miR-147-5p                                                                                                                                                                                                                                                                                                                                                                                                                                                                                                                                                                                                                                                                                                                                                                                                                                                                                                                                                                                                                                                                                                                                                                                                                                                                        |

miR-10b-3p, miR-876-3p, miR-615-5p, miR-125a, miR-2355-5p, miR-874-3p, miR-331-3p, miR-125b-5p, miR-2433, miR-486b-3p, miR-103b, miR-16-5p, miR-193a-5p, miR-330-5p, miR-345-3p, miR-615-3p, miR-582-3p, miR-6517, miR-299a-3p, novel\_121, miR-322-5p, miR-29b-2-5p, miR-450c-5p, miR-490-3p, novel\_39, miR-28b, miR-1306, miR-3141, miR-195a-5p, miR-2319a, miR-450b-3p, miR-1291, miR-26b-5p, miR-320b, miR-3074-5p, miR-669, miR-299b-3p, miR-2404, miR-323a-5p, miR-16a, miR-28c, miR-6402, miR-15a, miR-502-5p, novel\_1, miR-128-1-5p, miR-326-3p, miR-371b-3p, miR-145a-5p, miR-22-3p, miR-1843b-5p, miR-744-5p, miR-497-5p, miR-16b, miR-133b-5p, miR-411-5p, miR-2285g, miR-2411-3p, novel\_51, miR-3141, miR-377-3p, miR-125a-5p, miR-378a-5p, miR-124-5p, miR-432-3p, miR-2285c, miR-1827, miR-625-5p, miR-1895, miR-2331-3p, miR-504-5p, miR-15b-5p, miR-204-3p, miR-22-3p, novel\_32, miR-323-5p, miR-377-3p, miR-132-5p, miR-2284s, miR-29b-2-5p, miR-324-3p, miR-1468-5p, miR-874-5p, miR-424-5p, miR-664a, miR-214, miR-3074-5p, miR-6134, miR-188-3p, miR-1193, miR-2904, miR-2366, miR-133a-3p, miR-664-5p, miR-532-3p, miR-15a-5p, miR-345-3p, miR-92a-1-5p, miR-125b, miR-185-3p, miR-324-3p, miR-210-5p, miR-26a-5p, miR-299-3p, miR-486-3p, miR-361-3p, miR-504, miR-7977, miR-20a-3p, miR-2319b, miR-4792, miR-652-3p, miR-107-5p, miR-1973, miR-615, miR-6527, miR-3059-5p, miR-2447, miR-877-3p, miR-296-5p, miR-484, miR-145b, novel\_4, miR-2300a-5p, miR-1343-3p, miR-2285e, miR-2459, miR-147a, miR-16b, miR-326, miR-1306-5p, novel\_103, miR-103a-2-5p, miR-1468, miR-214-3p, miR-424-5p, miR-1388-3p, miR-4532

RNF215 ENSOARGO(ring fin) miR-2300a-5p, miR-429-3p, miR-3431, miR-200b, miR-24-2-5p, miR-1197-5p, miR-194-5p, miR-218-2-3p, miR-2300b-3p, miR-200b-3p, miR-4429, miR-30c-1-3p, miR-2285r, novel\_51, miR-194a, miR-30c-2-3p, miR-200c, miR-374a-5p, miR-320b, miR-200c-3p, miR-320d, miR-655-5p, miR-2355-5p, miR-30c-1-3p, miR-320c, miR-6130, miR-320a, miR-3970, miR-361-3p, miR-410-5p, miR-194b-5p, miR-665-5p, miR-3958-5p, miR-4510, novel\_42, miR-3059-5p, miR-361-3p, miR-320e, miR-6402

SHMT2 ENSOARGO(serine h) miR-205-5p, miR-493-5p, miR-487a, miR-494-3p, miR-1388-3p, miR-2284f, miR-2284b, miR-2284a, miR-1b-5p, miR-2284y, novel\_73, miR-2284u, miR-134-3p, miR-142-5p, miR-135a-1-3p, miR-6402, miR-2332, miR-142b, miR-655-3p, miR-19b-1-5p, miR-2284o, miR-6516-3p, miR-331-5p, miR-154-3p, miR-490-5p, miR-136-3p, novel\_120, miR-6128, miR-142a-5p, miR-374c-5p, miR-331-5p, miR-655, miR-2284e, miR-136-5p, miR-10b-3p, novel\_48, miR-493-5p, miR-140-5p, miR-2284g, miR-487a-3p, miR-545-3p, miR-139-5p, miR-7689-3p, miR-139-5p, miR-331-5p, miR-378g

RWDD4 ENSOARGO(RWD doma) miR-7641, miR-3959-5p, miR-1247-3p, miR-329-3p, miR-362-3p, miR-362-3p, miR-2904, miR-3601, miR-362-3p, miR-451a, miR-329a, miR-708-5p, miR-30b-3p, miR-147-5p, miR-28-5p

BCKDHB ENSOARGO(branched

|        |                         |                                                                                                                                                                                                                                                                                                                                                                                                                                                                                                                                                                                                                                                                                                                                                                                                                                                                                                                                                                                                                                                                                                                                                                                                                                                                                                                                                                                                                                                                                                                                                                                                                                                                                                                                                                |
|--------|-------------------------|----------------------------------------------------------------------------------------------------------------------------------------------------------------------------------------------------------------------------------------------------------------------------------------------------------------------------------------------------------------------------------------------------------------------------------------------------------------------------------------------------------------------------------------------------------------------------------------------------------------------------------------------------------------------------------------------------------------------------------------------------------------------------------------------------------------------------------------------------------------------------------------------------------------------------------------------------------------------------------------------------------------------------------------------------------------------------------------------------------------------------------------------------------------------------------------------------------------------------------------------------------------------------------------------------------------------------------------------------------------------------------------------------------------------------------------------------------------------------------------------------------------------------------------------------------------------------------------------------------------------------------------------------------------------------------------------------------------------------------------------------------------|
|        |                         | miR-30b, miR-320d, miR-106a, miR-2284m, miR-181b-5p, novel_127, miR-20a, miR-376a-5p, miR-125b-2-3p, miR-199a-5p, miR-200a, miR-376c-5p, miR-29a-5p, miR-376b-5p, miR-30c-5p, miR-3591-5p, miR-376a-5p, miR-30a-5p, miR-4429, miR-30c, miR-18a-3p, miR-106a, miR-376a-5p, miR-322-5p, miR-23b-3p, miR-340-5p, miR-23c, miR-15a-5p, miR-2284k, miR-135a-1-3p, miR-3604, novel_74, miR-331-5p, miR-424-5p, miR-874-5p, miR-2284v, miR-16-5p, miR-93, miR-181c-5p, miR-30e-5p, miR-503-3p, miR-331-5p, miR-93-5p, miR-23b, miR-376c-5p, miR-320a, miR-17-5p, miR-3154, miR-30f, miR-376c-5p, miR-20b-5p, miR-186-5p, miR-140-5p, miR-132-5p, miR-199a-5p, miR-15b-5p, miR-320b, miR-377-3p, miR-16b, miR-106b-5p, novel_51, miR-17-5p, miR-106a-5p, miR-199b-5p, miR-106a-5p, miR-424-5p, miR-101-5p, miR-23a-3p, miR-744-3p, miR-2285r, miR-181a-5p, miR-1434-3p, miR-4791, miR-1388-5p, miR-16b, miR-497-5p, miR-3535, miR-2284d, miR-147a, miR-20b, miR-15a, miR-30b-5p, miR-20a-5p, miR-6402, miR-142b, miR-16a, miR-6119-3p, novel_1, miR-2284j, miR-181d-5p, novel_111, miR-199b-5p, miR-376b-5p, miR-199b-5p, miR-18a-3p, miR-195a-5p, novel_94, miR-376a-2-5p, miR-2404, miR-320c                                                                                                                                                                                                                                                                                                                                                                                                                                                                                                                                                                         |
| RAD23B | ENSOARGO(RAD23 homolog) |                                                                                                                                                                                                                                                                                                                                                                                                                                                                                                                                                                                                                                                                                                                                                                                                                                                                                                                                                                                                                                                                                                                                                                                                                                                                                                                                                                                                                                                                                                                                                                                                                                                                                                                                                                |
| KIF26A | ENSOARGO(kinesin)       | miR-485-5p, miR-361-3p, miR-24-3p, miR-92a-1-5p, miR-140-3p, novel_42<br>miR-144, miR-409-3p, miR-2284k, miR-5100, miR-6128, miR-144-5p, miR-28a-3p, miR-1814c, miR-137-3p, miR-23b, miR-488-3p, miR-424-3p, miR-3965, miR-2285aa, miR-503-3p, miR-28-3p, miR-30f, miR-205-5p, miR-148b-5p, miR-30a-3p, miR-2385-3p, miR-4286, miR-181a-2-3p, miR-128-3p, miR-345-3p, miR-1271-5p, miR-376a-5p, miR-2285ad, miR-2285m, miR-371b-3p, miR-3959-3p, miR-376a-2-5p, miR-3065-5p, miR-3591-3p, miR-216a-3p, miR-144-3p, miR-26b-5p, miR-329-5p, miR-3074-5p, miR-466f-3p, miR-2411-3p, miR-194a, miR-539-3p, miR-2284l, miR-130b-5p, miR-493-5p, miR-6239, miR-2284x, miR-2284ab, miR-219a-1-3p, miR-197-3p, miR-194-5p, novel_23, miR-145a-5p, miR-374b-3p, miR-708-3p, miR-411-5p, miR-2284d, miR-1468-5p, miR-130b-5p, novel_74, miR-487b-5p, miR-30a-3p, miR-3604, miR-664a-5p, miR-338-5p, miR-30e-3p, miR-142a-5p, miR-1271, miR-665-5p, miR-3184-3p, miR-3074-5p, miR-582-5p, miR-411, let-7f-1-3p, miR-21-3p, miR-548o-3p, miR-21-3p, miR-2284m, miR-219b-5p, miR-345-3p, miR-26a-5p, miR-2424, miR-376a-5p, miR-142a-3p, miR-345-3p, miR-216c-5p, miR-183-5p, miR-329a-5p, miR-1434-5p, miR-188-3p, miR-376a-5p, miR-2300b-3p, miR-487a-3p, miR-7859, miR-383-5p, miR-23b-3p, miR-23c, miR-340-5p, miR-485-3p, miR-30d-3p, miR-548e-3p, miR-2285y, miR-371a-5p, miR-107-5p, miR-2285n, miR-101-3p, miR-877-3p, miR-194b-5p, miR-2284j, miR-212-3p, miR-493-5p, miR-877-3p, miR-96-5p, miR-381-3p, miR-144-5p, miR-203-3p, miR-2483-3p, miR-3082-5p, miR-2285u, miR-452-3p, miR-103a-2-5p, miR-1468, miR-487b-5p, novel_103, miR-2310, miR-23a-3p, miR-744-3p, miR-101b-3p, miR-101a-5p, miR-6529a, miR-216a-3p, miR-142-5p, miR-142-3p, miR-145b, miR-548w |
| SS18   | ENSOARGO(synovial)      |                                                                                                                                                                                                                                                                                                                                                                                                                                                                                                                                                                                                                                                                                                                                                                                                                                                                                                                                                                                                                                                                                                                                                                                                                                                                                                                                                                                                                                                                                                                                                                                                                                                                                                                                                                |



miR-330-3p, miR-2285ad, miR-145b, miR-1b-3p, novel\_121, miR-194-3p, miR-216a-3p, miR-545-5p, miR-1193, miR-3071-5p, miR-145a-5p, miR-128-3p, miR-6240, miR-574-3p, miR-183-5p, miR-195a-3p, miR-2483-5p, miR-664b-3p, miR-2478, miR-2285b, miR-376b-5p, miR-376c-5p, miR-2432, miR-205-5p, miR-330-3p, miR-487b-5p, miR-660, miR-660-5p, miR-211-5p, miR-126b-5p, miR-2284s, miR-331-5p, miR-154b-5p, miR-203-3p, miR-331-5p, miR-361-3p, miR-140-5p, miR-216a-3p, miR-27b-5p, miR-876-3p, miR-543-3p, miR-7975, miR-3074-1-3p, miR-145a-3p, miR-361-3p, miR-211, miR-2285j, miR-34c-3p, miR-338-5p, miR-665, miR-100-3p, miR-331-5p, miR-204-5p

FAM177A1 ENSOARGO family w miR-424-5p, miR-382-3p, miR-378d, miR-8485, miR-193a, miR-320b, miR-326, novel\_103, miR-2957, miR-505, miR-16b, miR-483-3p, miR-125a-5p, miR-1343-5p, miR-340-3p, miR-3955-5p, miR-103a-3p, miR-133b-5p, miR-5010-3p, miR-3431, miR-103, miR-653, miR-873a-5p, miR-378b, miR-181a-5p, miR-125b-2-3p, miR-30b-3p, miR-30b-3p, miR-378c, miR-16b, miR-101a-5p, miR-497-5p, miR-2447, miR-181d-5p, miR-2285x, miR-326-3p, miR-154a, miR-4324, miR-15a, miR-16a, miR-33a-3p, miR-502b, miR-2284q, miR-378e, miR-3082-5p, miR-374c-3p, miR-320c, miR-6535, miR-361-3p, miR-21c, miR-3065-5p, miR-378b, miR-1291, miR-107, miR-195a-5p, miR-378f, miR-3529-3p, miR-4286, novel\_39, miR-490-3p, miR-196a-3p, miR-422a, miR-125b, miR-320d, miR-466i-5p, miR-181b-5p, miR-107, miR-200a-3p, miR-548e-3p, miR-1224-5p, miR-322-5p, miR-7859, miR-483-3p, miR-15a-5p, miR-378h, novel\_83, miR-129-1-3p, miR-378i, miR-1343-5p, miR-1197-5p, miR-378a-3p, miR-5703, miR-330-5p, miR-4429, miR-142-3p, miR-378d, miR-378c, miR-129-2-3p, miR-16-5p, miR-1197-3p, miR-378c, miR-181c-5p, miR-410-5p, miR-125b-5p, miR-665, miR-331-5p, miR-378a-3p, miR-548o-3p, miR-216b-3p, miR-2285aa, miR-2355-5p, miR-141-3p, miR-125a, miR-552-3p, miR-2284s, miR-331-5p, miR-582-5p, miR-204-3p, miR-15b-5p, miR-331-5p, miR-320a, miR-3154, miR-625-5p, miR-7144-5p, miR-582-5p, miR-671-5p

PRSS45 ENSOARGO protease miR-424-5p, novel\_51, miR-16b, miR-3141, miR-146a, miR-326, miR-214-3p, miR-1343-5p, miR-146b, miR-25-5p, miR-1343-3p, miR-216a-3p, miR-194-3p, miR-143-5p, miR-484, miR-744-5p, miR-497-5p, miR-4508, miR-138, miR-16b, miR-2447, miR-449a, miR-326-3p, miR-24-3p, miR-371b-3p, miR-1307-3p, miR-361-3p, miR-16a, miR-34c, miR-502-5p, miR-1247-3p, miR-15a, miR-669, miR-34b, miR-670-3p, miR-18a-3p, miR-3141, miR-195a-5p, miR-146b-5p, novel\_39, miR-486-3p, miR-146a-5p, miR-92a-1-5p, miR-185-3p, novel\_127, miR-34b-5p, miR-760-3p, miR-191-3p, miR-6517, miR-18a-3p, miR-15a-5p, miR-322-5p, miR-330-5p, miR-1343-5p, miR-34a-5p, miR-214, miR-16-5p, miR-338-3p, miR-324-3p, miR-2433, miR-486b-3p, miR-4492, miR-424-5p, miR-138-5p, miR-296-3p, miR-874-3p, miR-15b-5p, miR-204-3p, miR-34c-5p, miR-1827, miR-10b-3p, miR-2474

TJAP1 ENSOARGO tight ju miR-193a, novel\_83, miR-668-5p, miR-33b-3p

7-Mar ENSOARGO membrane

miR-670-3p, miR-2404, miR-10a-5p, miR-655-5p, miR-320b, miR-195a-5p, miR-6516-3p, miR-135b-5p, miR-1291, miR-2428, miR-326-3p, miR-371b-3p, miR-24-3p, miR-17-3p, miR-1193, miR-147-5p, novel\_1, miR-16a, miR-6402, miR-15a, miR-185-5p, miR-377-5p, miR-130a-3p, miR-30b-3p, miR-145a-5p, miR-374b-3p, miR-1285, miR-653, miR-130b-5p, miR-365a-3p, miR-374c-3p, miR-141-3p, miR-370-3p, miR-671-5p, miR-485-5p, miR-1814c, miR-10b-3p, miR-362-5p, miR-3154, miR-2448-3p, miR-365a-5p, miR-500b-5p, miR-6128, miR-1306-5p, miR-28-5p, miR-486b-3p, miR-409-3p, miR-135a-5p, miR-370-5p, miR-10a-5p, miR-3578, miR-345-3p, miR-1271-3p, miR-1957a, miR-380-5p, miR-24-2-5p, miR-4286, miR-1, miR-17-3p, miR-450a-2-3p, miR-339a, miR-27a-3p, miR-454-5p, miR-489, miR-7977, miR-20a-3p, miR-452-3p, novel\_94, miR-877-3p, miR-129b-5p, miR-154a, miR-362-5p, miR-1296-5p, miR-541-3p, miR-212-3p, novel\_60, miR-3059-5p, miR-107-5p, miR-382-3p, miR-500-5p, miR-9788-3p, miR-222-5p, miR-27a-3p, miR-2300a-5p, novel\_4, miR-30b-3p, miR-125b-2-3p, miR-10b, miR-296-5p, miR-484, miR-3187-3p, miR-652-5p, miR-424-5p, miR-3955-3p, novel\_124, miR-362-3p, miR-326, novel\_103, novel\_25, miR-204-3p, miR-6130, miR-21-3p, miR-370-5p, miR-221-5p, miR-545-3p, novel\_99, miR-6134, miR-338-3p, miR-206-3p, miR-10b-5p, miR-4510, miR-145a-3p, miR-708-5p, miR-424-5p, miR-6516-3p, miR-664a, miR-17-3p, miR-338-5p, miR-15a-5p, miR-383-5p, miR-3600, miR-5703, miR-2904, miR-362-3p, miR-2432, miR-146a-5p, miR-29b-1-5p, miR-183-5p, miR-21-3p, miR-299-3p, miR-221-5p, miR-760-3p, miR-466i-5p, miR-185-3p, miR-181b-3p, miR-669, miR-677, miR-299b-3p, miR-374c-3p, miR-3120-3p, miR-3074-5p, novel\_68, miR-2319a, miR-146b-5p, miR-412-3p, miR-3065-5p, miR-301b-3p, miR-758-5p, miR-206, miR-6119-3p, miR-4324, miR-1247-3p, miR-411-5p, miR-149-5p, miR-320-5p, miR-31-5p, miR-3955-5p, miR-27b-3p, miR-197-5p, miR-505-5p, miR-302a-5p, miR-328-3p, miR-545-5p, miR-2285ad, miR-485-3p, miR-30d-3p, miR-3600, miR-148a-5p, miR-16-1-3p, miR-218-1-3p, miR-501-3p, miR-130a-5p, miR-148b-5p, miR-92b-3p, miR-490-3p, miR-380-3p, miR-2424, miR-345-3p, miR-2385-3p, miR-92a-3p, miR-26a-5p, miR-125a-3p, miR-25-3p, miR-139-5p, miR-582-5p, miR-154b-5p, miR-32-5p, miR-552-3p, miR-216b-3p, miR-767, miR-2312, miR-424-3p, miR-2285c, miR-488-3p, miR-200a-5p, miR-224-5p, miR-590-3p, miR-539-5p, miR-767-5p, miR-129-5p, miR-3969, miR-100-3p, miR-539-5p, miR-2285g, miR-544b, miR-2285e, miR-148b-5p, miR-16-1-3p, miR-21-5p, miR-380-3p, miR-2284x, miR-1839-5p, miR-16-2-3p, miR-26a-2-3p, miR-708-3p, miR-873a-5p, miR-3071-5p, miR-501-3p, miR-2284l, miR-8485, miR-539-3p, miR-493-5p, miR-382, miR-676-3p, miR-224-5p, miR-32, miR-500-3p, miR-144-3p, miR-139-5p, miR-26b-5p, miR-126b-5p, miR-3120-3p, miR-136-5p, miR-9-3p, miR-6395, miR-493-5p, miR-2387, miR-2285ab, miR-361-3p, miR-21c, miR-7705, miR-502-3p, miR-9-3p, miR-363-3p, miR-452-5p, miR-2285f, miR-499a-5p, miR-92a-3p, miR-6123, miR-6402, miR-382-5p, miR-2285y

|       |                    |                                                                                                                                                                                                                                                                                                                                                                                                                                                                                                                                                                                                                                                                                                                                                                                                                                                                                                                                                                                                                                                                                                                                                                                                                                                                                                                                                                                                                                                                                                                                                                                                                                                                                                                                                                                                                                                                                                                                                                                                                                                                                                                                                                                                                                                                                       |
|-------|--------------------|---------------------------------------------------------------------------------------------------------------------------------------------------------------------------------------------------------------------------------------------------------------------------------------------------------------------------------------------------------------------------------------------------------------------------------------------------------------------------------------------------------------------------------------------------------------------------------------------------------------------------------------------------------------------------------------------------------------------------------------------------------------------------------------------------------------------------------------------------------------------------------------------------------------------------------------------------------------------------------------------------------------------------------------------------------------------------------------------------------------------------------------------------------------------------------------------------------------------------------------------------------------------------------------------------------------------------------------------------------------------------------------------------------------------------------------------------------------------------------------------------------------------------------------------------------------------------------------------------------------------------------------------------------------------------------------------------------------------------------------------------------------------------------------------------------------------------------------------------------------------------------------------------------------------------------------------------------------------------------------------------------------------------------------------------------------------------------------------------------------------------------------------------------------------------------------------------------------------------------------------------------------------------------------|
| GPBP1 | ENSOARGO(GC-rich)  | <p>miR-4429, miR-345-3p, miR-181a-5p, miR-22-3p, novel_23, miR-3071-5p, miR-217-5p, miR-145a-5p, miR-188-3p, miR-23b-3p, miR-539-5p, miR-23c, miR-221-3p, miR-2355-3p, miR-222, miR-3600, miR-145b, miR-320d, miR-17-3p, miR-181b-5p, miR-320b, miR-1306-5p, miR-217, miR-345-3p, miR-2411-3p, miR-664b-3p, miR-130a-5p, miR-503-3p, miR-23a-3p, miR-625-5p, miR-543-3p, novel_94, miR-9-3p, miR-582-5p, miR-424-3p, miR-221, miR-2387, miR-1306, miR-320a, miR-23b, miR-582-5p, miR-6535, miR-320c, miR-22-3p, miR-378b, miR-664a, miR-17-3p, miR-22-5p, miR-222-3p, miR-2440, miR-409-3p, miR-338-5p, miR-323-3p, novel_27, miR-181c-5p, miR-539-5p, miR-6527, miR-17-3p, miR-181d-5p, miR-2330-3p</p> <p>miR-744-3p, miR-424-5p, miR-124a, miR-2310, miR-30c-1-3p, miR-16b, miR-3085-3p, miR-409b, miR-421, miR-2285e, miR-147a, miR-125b-2-3p, miR-30b-3p, miR-2426, miR-450b-5p, miR-452-5p, miR-363-3p, miR-212-3p, miR-3059-5p, miR-8095, miR-361-3p, miR-2285n, miR-7977, miR-2285u, miR-541-5p, miR-2319b, miR-3064-5p, miR-4443, miR-203-3p, miR-25, miR-504, miR-329a-5p, miR-185-3p, miR-324-3p, miR-202-5p, miR-485-3p, novel_83, miR-532-3p, miR-15a-5p, miR-487a-3p, miR-188-3p, miR-124-3p, novel_133, miR-378d, miR-218-1-3p, miR-16-1-3p, miR-184-3p, miR-142-3p, miR-129-2-3p, miR-4510, miR-145a-3p, miR-6134, miR-338-3p, miR-19b-1-5p, miR-424-5p, miR-17-3p, miR-552-3p, miR-2331-3p, miR-504-5p, miR-30c-1-3p, miR-32-5p, miR-15b-5p, miR-323-5p, miR-6130, miR-27b-5p, miR-2285c, miR-21a-3p, novel_99, miR-543-3p, miR-628-5p, miR-668-3p, miR-539-3p, miR-2285r, novel_51, miR-32, miR-466f-3p, miR-483-3p, miR-6238, miR-185-5p, miR-2285g, novel_23, miR-1843b-5p, miR-19b-2-5p, miR-497-5p, miR-16-1-3p, miR-219a-1-3p, miR-16b, miR-138, miR-30b-3p, miR-17-3p, miR-24-3p, miR-16a, miR-485-3p, miR-133a-5p, miR-15a, miR-92a-3p, miR-3120-3p, miR-329-5p, miR-669, miR-323a-5p, miR-2404, miR-150-5p, miR-195a-5p, miR-3064-5p, miR-192-3p, miR-92b-3p, miR-30f, miR-30c-2-3p, miR-2285af, miR-92a-3p, miR-17-3p, miR-2898, miR-129-1-3p, miR-483-3p, miR-322-5p, miR-3591-5p, miR-300, miR-16-5p, miR-6128, miR-145-3p, miR-2332, novel_63, miR-2433, miR-138-5p, miR-25-3p, miR-300-3p, miR-381-3p, miR-488-3p, miR-1814c, miR-329b, miR-10b-3p</p> |
| MCU   | ENSOARGO(mitochon) |                                                                                                                                                                                                                                                                                                                                                                                                                                                                                                                                                                                                                                                                                                                                                                                                                                                                                                                                                                                                                                                                                                                                                                                                                                                                                                                                                                                                                                                                                                                                                                                                                                                                                                                                                                                                                                                                                                                                                                                                                                                                                                                                                                                                                                                                                       |

miR-101a-5p, miR-362-3p, miR-378c, miR-30b-3p, miR-541, miR-378b, miR-329-3p, miR-2285e, miR-455-3p, miR-9788-3p, miR-1298-3p, miR-425-3p, miR-222-5p, miR-199b-3p, miR-548w, miR-330-3p, miR-199b-5p, miR-1185-5p, miR-16b, miR-182-5p, miR-362-3p, miR-431-5p, novel\_103, miR-2310, miR-193a, miR-378d, miR-652-5p, miR-2284b, miR-23a-3p, miR-424-5p, miR-494-3p, miR-129b-5p, miR-199b-5p, miR-361-3p, miR-203-3p, miR-3082-5p, miR-378e, miR-499b-5p, miR-2284g, miR-139-5p, miR-2284q, miR-1843a-3p, miR-2285t, miR-3968, miR-1285-5p, miR-2284j, miR-541-3p, miR-2284u, miR-133a-3p, miR-19b-3p, miR-1197-5p, miR-378a-3p, miR-2904, miR-362-3p, miR-378i, miR-15a-5p, miR-23c, miR-7859, miR-23b-3p, miR-21-3p, miR-221-5p, miR-1277-5p, miR-466i-5p, miR-2284m, miR-422a, miR-125b, miR-125b-2-3p, miR-216c-5p, miR-186-5p, miR-2285c, miR-15b-5p, miR-139-5p, miR-6516, miR-132-5p, miR-182-5p, miR-532-5p, miR-378a-3p, miR-221-5p, miR-424-5p, novel\_74, miR-324-3p, miR-346, miR-378c, miR-7862, miR-188-5p, miR-2284x, miR-497-5p, miR-30b-3p, miR-16b, miR-374b-3p, miR-149-5p, miR-194-3p, miR-2284d, miR-412-5p, miR-2285g, miR-26b-3p, miR-466f-3p, miR-125a-5p, miR-330-3p, miR-365b-5p, miR-2284l, miR-6240, miR-378f, miR-195a-5p, miR-7975, miR-19a-3p, miR-150-5p, miR-374c-3p, miR-670-3p, miR-146b-3p, miR-3120-3p, miR-147-5p, miR-199c, novel\_1, miR-382-5p, miR-16a, miR-4324, miR-15a, miR-199b-5p, miR-3957-3p, miR-1a-1-5p, miR-135a-2-3p, miR-3578, novel\_121, miR-545-5p, miR-378h, miR-6516-5p, miR-322-5p, miR-431, miR-1a-2-5p, miR-6119-5p, miR-2397-5p, miR-192-3p, miR-1271-3p, miR-2284a, miR-199a-5p, miR-1957a, miR-2284y, miR-2403, miR-1814c, miR-7144-5p, miR-329a, let-7g-3p, miR-23b, miR-488-3p, miR-199a-5p, miR-331-5p, miR-374c-3p, miR-615-5p, miR-125a, miR-2355-5p, miR-3068-3p, miR-125b-5p, miR-1-5p, miR-2284k, miR-365a-5p, miR-378c, miR-16-5p, miR-369-3p, miR-590-3p, miR-329a-5p, miR-146a-5p, miR-500a-5p, miR-182-5p, miR-218-5p, miR-146a, miR-146b, miR-532-5p, miR-182-5p, miR-2331-3p, miR-329-5p, novel\_78, miR-545-5p, miR-656-3p, miR-539-5p, miR-376a-5p, miR-1839-5p, miR-146b-5p, miR-379-5p

miR-152-3p, novel\_96, novel\_127, let-7f-5p, let-7g, miR-148b-5p, miR-1343-5p, miR-330-5p, miR-30c, miR-299a-3p, miR-134-5p, miR-2284z, miR-322-5p, miR-9-5p, miR-6740-5p, miR-2284k, miR-2433, miR-134-5p, miR-16-5p, miR-193a-5p, miR-181a-2-3p, miR-1260b, miR-30e-5p, miR-1248, miR-574-5p, novel\_51, miR-193a-3p, miR-378a-5p, miR-668-3p, miR-628-5p, miR-6240, let-7j, miR-432-3p, miR-2284l, miR-22-3p, miR-197-3p, miR-223-3p, miR-497-5p, miR-4508, miR-16b, miR-3955-5p, miR-31-5p, miR-103a-3p, miR-194-3p, miR-149-5p, miR-134-3p, miR-425-5p, miR-412-5p, miR-4324, miR-576-3p, miR-193b-3p, miR-301b-3p, miR-150-5p, miR-3970, miR-148a-3p, let-7e-5p, miR-378f, miR-412-3p, miR-6535, miR-669, miR-299b-3p, miR-324-3p, miR-422a, let-7k, miR-98-5p, miR-486-3p, miR-377-5p, miR-378a-3p, miR-30c-5p, miR-378i, miR-1961, miR-133a-3p, miR-34a-5p, miR-18a-3p, miR-328-3p, miR-210-3p, miR-95-3p, miR-151-3p, let-7f, miR-2285j, miR-454-3p, miR-4492, miR-214, miR-590-3p, let-7b, miR-769-5p, miR-6525, miR-346, miR-30d-5p, miR-625-5p, miR-1827, miR-296-3p, miR-30c-1-3p, miR-504-5p, miR-15b-5p, let-7i-5p, miR-301a-3p, miR-16b, miR-199a-3p, miR-214-3p, miR-491-5p, miR-130b-3p, miR-487b-5p, miR-8485, miR-2310, miR-378d, miR-2284r, miR-541, miR-330-3p, miR-1343-3p, miR-1185-3p, miR-2459, miR-421, miR-411b-5p, miR-1298-3p, miR-147a, miR-218-5p, miR-3968, miR-628-3p, miR-2284j, miR-9-5p, miR-2447, miR-361-3p, miR-140-5p, miR-1983, miR-544-5p, miR-504, miR-136-5p, miR-211-5p, miR-4792, miR-2319b, miR-1185-2-3p, miR-378g, miR-30c-2-3p, let-7c-5p, miR-1260a, miR-107, miR-1957a, miR-30a-5p, miR-134, let-7d, miR-582-3p, miR-378h, miR-26c, miR-410-5p, miR-370-5p, miR-204-5p, miR-374b-3p, miR-486b-3p, miR-3607-3p, miR-6128, miR-103b, miR-378c, miR-374a-3p, miR-7144-5p, miR-485-5p, miR-1814c, miR-615-5p, miR-154b-5p, miR-2284n, miR-34c-5p, miR-412-3p, miR-133b-3p, miR-411-3p, miR-107, miR-133a-3p, novel\_48, miR-151a-3p, miR-103a-3p, miR-541-5p, miR-216b-3p, miR-412, miR-203-3p, miR-103, novel\_121, miR-151-3p, miR-379-3p, miR-107, miR-592, miR-452-5p, miR-133a-3p, miR-8095

GNB2L1 ENSOARGO(guanine

PPP2R3C ENSOARGO(protein

miR-143-3p, miR-486-3p, miR-2285p, miR-196a-3p, miR-34b-3p, miR-324-3p, miR-760-3p, miR-2284m, miR-2484, miR-148b-3p, miR-222-5p, miR-210-3p, novel\_83, miR-2366, miR-193b-5p, miR-188-3p, miR-217-5p, miR-5703, novel\_73, miR-142-3p, miR-148a-5p, miR-2284u, miR-664-5p, miR-3184-3p, miR-10b-5p, miR-2285j, miR-338-5p, miR-17-3p, miR-669a-3p, miR-130b-5p, miR-32-3p, miR-660-5p, miR-182-5p, miR-296-3p, miR-10a, miR-204-3p, miR-339b, miR-494-3p, miR-652-5p, miR-23a-3p, miR-193a, miR-326, miR-1306-5p, novel\_103, miR-182-5p, miR-323b-3p, miR-505, miR-1185-5p, miR-153-3p, miR-1343-3p, miR-27a-3p, miR-539-5p, miR-376b-3p, miR-153, miR-455-3p, miR-148b-5p, miR-10b, miR-125b-2-3p, miR-323b, miR-2426, miR-101a-5p, miR-2284aa, miR-885-5p, miR-3956-3p, miR-32-3p, novel\_60, miR-2447, miR-2284j, miR-361-3p, miR-2440, miR-371a-5p, miR-335, miR-499a-5p, miR-2284g, miR-211-5p, miR-2483-3p, miR-27a-3p, miR-376d, miR-4443, miR-203-3p, miR-361-3p, miR-129b-5p, miR-668-5p, miR-136-5p, miR-335-3p, miR-376a-3p, miR-181a-2-3p, miR-148b-5p, miR-2284a, novel\_39, miR-29a-5p, miR-2284y, miR-8117, miR-376b-3p, miR-339a, miR-217, miR-17-3p, miR-200a-3p, miR-152-3p, miR-107, novel\_79, novel\_121, miR-134-5p, miR-2284z, miR-134, miR-345-3p, miR-330-5p, miR-10a-5p, miR-2284v, miR-2332, novel\_63, miR-2284k, miR-6740-5p, novel\_9, miR-134-5p, miR-486b-3p, miR-204-5p, miR-141-3p, miR-331-5p, miR-2284n, miR-424-3p, miR-200a-5p, miR-485-5p, miR-7144-5p, miR-130b-5p, miR-2411-3p, miR-124-5p, miR-660, miR-103a-3p, miR-26b-3p, miR-339-5p, miR-2284d, miR-432-5p, miR-103, miR-149-5p, novel\_116, miR-223-3p, miR-1434-3p, miR-432, miR-3071-5p, miR-2284ab, miR-27b-3p, miR-335-5p, miR-17-3p, miR-495-3p, miR-323c, miR-3959-3p, miR-211, miR-326-3p, miR-133a-5p, novel\_1, miR-378b, novel\_68, miR-10a-5p, miR-411b-3p, miR-novel\_74, miR-21-3p, miR-34b-5p, miR-320e, miR-34c, miR-449a, miR-4510, miR-186-5p, miR-34a-5p, miR-1827, novel\_133, miR-21a-3p, miR-188-3p, miR-3970, miR-34b, miR-6130, miR-487a-3p, miR-34c-5p, miR-421, miR-485-3p

HRH4

ENSOARGO(histamin

UBE3D

ENSOARGO(ubiquiti

miR-204-5p, miR-331-3p, miR-378c, miR-103b, miR-7144-5p, miR-3074-1-3p, miR-488-3p, miR-301, miR-223-5p, miR-374c-3p, miR-365a-3p, miR-503-3p, novel\_96, let-7f-5p, miR-3071-3p, miR-30c-2-3p, let-7c-5p, miR-2285af, let-7g, miR-2285b, miR-1, miR-30a-3p, miR-128-3p, miR-496, let-7d, miR-196a-5p, miR-1290, miR-450a-1-3p, miR-9-5p, miR-378h, miR-7641, miR-412, miR-299a-3p, miR-222, novel\_1, miR-206, miR-379-3p, let-7i, miR-502-5p, miR-142b, miR-6402, miR-576-3p, miR-2428, miR-211, miR-323c, miR-2285x, miR-146b-5p, miR-378f, let-7e-5p, miR-3591-3p, miR-216a-3p, miR-2387, miR-3141, miR-299b-3p, miR-196b-5p, miR-3141, miR-7-5p, miR-146a, let-7j, miR-628-5p, miR-27b-3p, miR-21-5p, miR-30b-3p, miR-16-1-3p, miR-22-3p, miR-450c-3p, miR-7b-5p, miR-544b, miR-412-5p, miR-3535, let-7g-5p, miR-3431, miR-665, miR-450b-3p, miR-664a, miR-30a-3p, miR-655-3p, let-7f, miR-222-3p, miR-30e-3p, let-7b-5p, miR-6525, miR-206-3p, miR-378c, let-7b, miR-543-3p, miR-27b-5p, miR-655, miR-450a-1-3p, novel\_25, miR-22-3p, let-7i-5p, miR-544-3p, miR-21-3p, miR-532-5p, miR-378a-3p, miR-30c-1-3p, miR-496-3p, miR-3653-3p, let-7k, miR-299-3p, miR-98-5p, miR-216a-5p, miR-422a, miR-196a-3p, novel\_17, miR-146a-5p, miR-2432, miR-143-3p, miR-345-3p, miR-2285w, miR-33b-3p, miR-378a-3p, miR-378i, miR-2300b-3p, miR-1961, miR-2284h-5p, miR-30d-3p, miR-499a-5p, miR-1285-5p, miR-9-5p, miR-3059-5p, novel\_60, miR-212-3p, miR-3956-3p, miR-3963, miR-221, miR-409-5p, let-7d-5p, miR-27a-3p, miR-378e, miR-211-5p, miR-20a-3p, miR-452-3p, miR-146b, let-7e, miR-491-5p, miR-3955-3p, miR-378d, miR-30c-1-3p, miR-652-5p, let-7a-5p, miR-1388-3p, miR-382-3p, miR-378c, miR-544a, miR-412-3p, miR-7857, miR-1a-3p, miR-3962, miR-125b-2-3p, miR-30b-3p, miR-378b, miR-4791, miR-221-3p, miR-455-3p, miR-148b-5p, miR-2459, miR-27a-3p

miR-1290, miR-134-5p, miR-9-5p, miR-322-5p, novel\_79, miR-431, miR-429-3p, miR-6517, miR-200a-3p, miR-125a-3p, novel\_39, miR-2284y, miR-767, miR-876-3p, miR-345-5p, miR-300-3p, miR-3959-5p, miR-503-3p, miR-134-5p, miR-6740-5p, miR-2284k, miR-1260b, miR-1197-3p, miR-193a-5p, miR-16-5p, novel\_42, miR-2284v, miR-26a-2-3p, miR-497-5p, miR-27b-3p, miR-188-5p, miR-16b, novel\_23, miR-432, miR-149-5p, miR-3431, miR-339-5p, miR-340-3p, miR-193a-3p, miR-378a-5p, miR-377-3p, miR-146a, miR-668-3p, miR-380-5p, miR-146b-5p, miR-410-5p, miR-1306, miR-3591-3p, novel\_68, miR-3074-5p, miR-29a, miR-193b-3p, miR-29c-3p, miR-335-5p, miR-2284u, miR-33b-3p, novel\_73, miR-193b-5p, miR-328-3p, miR-210-3p, miR-212-5p, miR-30d-3p, miR-500a-5p, novel\_17, miR-2285p, miR-143-3p, miR-376a-5p, miR-377-5p, miR-1827, miR-339b, miR-345-5p, miR-500a-3p, miR-129b-3p, miR-299, miR-15b-5p, miR-377-3p, miR-552-3p, miR-1468-5p, miR-874-5p, miR-500, miR-130b-5p, miR-451a, miR-30a-3p, miR-30e-3p, miR-6525, miR-769-5p, miR-224-5p, miR-3958-5p, miR-433-5p, miR-3074-5p, miR-1388-5p, miR-758-3p, miR-541, miR-147a, miR-1298-3p, miR-1343-3p, miR-146b, miR-29b-1-5p, miR-16b, miR-431-5p, miR-2284b, miR-136-5p, miR-140-5p, miR-4443, miR-7689-3p, miR-211-5p, miR-4792, miR-139-5p, miR-2284g, miR-628-3p, miR-499a-5p, miR-7705, miR-877-3p, miR-6527, miR-2284j, miR-9-5p, miR-2447, miR-3956-3p, miR-200b-3p, miR-496, miR-29d-3p, miR-134, miR-582-3p, miR-6516-5p, miR-2898, miR-450a-2-3p, miR-200c-3p, miR-339a, miR-1260a, miR-200c, miR-2397-5p, miR-3065-3p, miR-490-3p, miR-1271-3p, miR-2284a, miR-380-5p, miR-29b-2-5p, miR-30a-3p, miR-181a-2-3p, miR-7144-5p, miR-485-5p, miR-671-5p, miR-10b-3p, miR-362-5p, miR-488-3p, miR-2448-3p, miR-2284n, miR-769, miR-141-3p, miR-215-5p, miR-28-5p, miR-204-5p, miR-138-5p, miR-767-5p, miR-29b-3p, miR-370-5p, miR-



miR-88b-3p, miR-1343-5p, miR-330-5p, miR-322-5p, miR-9-5p, miR-429-3p, miR-412, miR-6536, miR-200a-3p, miR-664-3p, miR-450b-5p, miR-29a-5p, miR-2284y, miR-200a, miR-3064-5p, miR-876-3p, miR-767, miR-345-5p, miR-2318, miR-301, miR-331-5p, miR-300-3p, miR-133c, miR-223-5p, miR-503-3p, miR-2355-5p, miR-125a, miR-331-5p, miR-100-3p, miR-125b-5p, miR-16-5p, miR-16b, miR-16-1-3p, miR-26a-2-3p, miR-497-5p, miR-223-3p, miR-7b-5p, miR-412-5p, miR-3431, miR-149-5p, miR-103a-3p, miR-7-5p, miR-105-5p, miR-194a, let-7j, miR-6240, miR-668-3p, miR-378f, miR-1306, miR-411b-3p, miR-6535, miR-144-3p, miR-669, miR-677, novel\_68, miR-329-5p, miR-26b-5p, miR-3120-3p, miR-206, miR-625-3p, miR-374c-5p, miR-199b-5p, miR-218-1-3p, miR-378i, miR-2366, miR-378a-3p, miR-1434-5p, miR-7859, miR-210-3p, miR-23c, miR-2284h-5p, miR-212-5p, miR-26a-5p, miR-2285p, miR-210-5p, miR-324-3p, miR-92a-1-5p, miR-422a, miR-664b-3p, miR-2285i, miR-376a-5p, miR-329a-5p, miR-2285w, miR-345-5p, miR-625-5p, miR-885-3p, miR-543-3p, miR-1827, miR-655, miR-15b-5p, miR-504-5p, miR-548o-3p, miR-216b-3p, novel\_74, miR-487b-5p, miR-130b-5p, miR-2285j, miR-664a-5p, miR-6525, miR-346, miR-3184-5p, miR-214, miR-1388-5p, miR-1a-3p, miR-147a, miR-455-3p, miR-421, miR-330-3p, miR-181b-2-3p, miR-487b-5p, miR-199b-5p, miR-214-3p, miR-182-5p, miR-16b, miR-378d, miR-1b-5p, miR-23a-3p, miR-504, miR-136-5p, miR-221, miR-139-5p, miR-2285u, miR-2440, miR-423-5p, miR-1285-5p, miR-2447, miR-9-5p, miR-300, miR-105-2, miR-200b-3p, miR-496, miR-3578, miR-302a-5p, miR-6516-5p, miR-378h, miR-222, miR-450a-2-3p, miR-107, miR-1957a, miR-199a-5p, miR-2284a, miR-1, miR-181a-2-3p, miR-7144-5p, miR-485-5p, miR-381-3p, miR-362-5p, miR-374c-3p, miR-199a-5p, miR-141-3p, miR-767-5p, miR-5100, miR-370-5p, miR-135a-1-3p, miR-331-3p, miR-135a-5p, miR-322-3p, miR-500b-5p, miR-378c, miR-1306-5p, miR-30b, miR-148a-5p, miR-493-3p, miR-1290, miR-2284h-5p, miR-487a-3p, miR-7859, miR-322-5p, miR-15a-5p, miR-148b-3p, miR-3600, miR-485-3p, miR-548e-3p, miR-152-3p, miR-450a-2-3p, miR-500a-5p, miR-122-3p, novel\_17, miR-125a-3p, miR-29b-1-5p, miR-216c-5p, miR-2285w, miR-186-5p, miR-500a-3p, miR-362-5p, miR-488-3p, miR-15b-5p, miR-300-3p, miR-301a-3p, miR-552-3p, miR-296-3p, miR-874-3p, miR-500, miR-454-3p, miR-424-5p, miR-592, miR-451a, miR-664a, miR-19b-1-5p, miR-3604, miR-2285j, miR-500b-5p, miR-6525, miR-16-5p, miR-193a-5p, miR-425-5p, miR-497-5p, miR-2889, miR-16b, miR-3071-5p, miR-19b-2-5p, miR-2113, miR-223-3p, miR-1434-3p, miR-148b-5p, miR-500-5p, miR-216a-3p, miR-194-3p, miR-539-5p, miR-130a-3p, miR-122-3p, miR-466f-3p, miR-130b-3p, miR-29b-1-5p, miR-16b, miR-539-3p, miR-8485, miR-193a, miR-2285r, miR-1388-3p, miR-424-5p, miR-544-5p, miR-877-3p, miR-195a-5p, miR-150-5p, miR-3065-5p, miR-148a-3p, miR-670-3p, miR-499b-5p, miR-541-5p, miR-147-5p, miR-6119-3p, miR-16a, novel\_87, miR-502-5p, miR-15a, miR-101-3p, miR-8095, miR-301b-3p, miR-362-5p, miR-371b-3p, miR-2285x, miR-452-5p, miR-3059-5p

|        |                     |                                                                                                                                                                                                                                                                                                                                                                                                                                                                                                                                                                                                                                                                                                                                                                                                                                                                                                                                                                                                                                                                                                                                                                                                                                                                                                                                                                                                                                                                                                                                                                                                                                                                                                                                                                                                                                                                                                                                                                                                                                                                                                                                                                                                                                                                                                                                                                                                                                                                                                                                                                                                          |
|--------|---------------------|----------------------------------------------------------------------------------------------------------------------------------------------------------------------------------------------------------------------------------------------------------------------------------------------------------------------------------------------------------------------------------------------------------------------------------------------------------------------------------------------------------------------------------------------------------------------------------------------------------------------------------------------------------------------------------------------------------------------------------------------------------------------------------------------------------------------------------------------------------------------------------------------------------------------------------------------------------------------------------------------------------------------------------------------------------------------------------------------------------------------------------------------------------------------------------------------------------------------------------------------------------------------------------------------------------------------------------------------------------------------------------------------------------------------------------------------------------------------------------------------------------------------------------------------------------------------------------------------------------------------------------------------------------------------------------------------------------------------------------------------------------------------------------------------------------------------------------------------------------------------------------------------------------------------------------------------------------------------------------------------------------------------------------------------------------------------------------------------------------------------------------------------------------------------------------------------------------------------------------------------------------------------------------------------------------------------------------------------------------------------------------------------------------------------------------------------------------------------------------------------------------------------------------------------------------------------------------------------------------|
| DOPEY1 | ENSOARGOC dopey fal | <p>miR-330-3p, miR-3600, miR-6516-5p, miR-2285g, miR-412-5p, miR-2285e, novel_121, miR-134-5p, miR-143-5p, miR-301b-5p, miR-134, miR-5703, miR-197-3p, miR-98-3p, miR-450b-5p, miR-101a-5p, miR-1388-5p, let-7a-3p, miR-6240, miR-3064-5p, miR-363-5p, miR-28b, miR-30c-1-3p, miR-26a-5p, miR-2285af, miR-30c-2-3p, miR-330-3p, miR-2898, miR-3085-3p, miR-3064-5p, miR-30c-1-3p, miR-26b-5p, miR-2285aa, miR-6516, miR-300-3p, miR-223-5p, miR-2285c, let-7f-1-3p, miR-381-3p, miR-412-3p, miR-767, miR-181a-3p, miR-9-3p, miR-485-5p, miR-1983, miR-9851-3p, novel_48, miR-452-5p, miR-98-3p, miR-323-3p, miR-6134, miR-181c-3p, miR-6402, miR-28c, novel_82, let-7b-3p, miR-301a-5p, miR-767-5p, miR-4726-5p, miR-134-5p, miR-625-3p, miR-138-5p, miR-494-5p, miR-2332, miR-331-3p, miR-125b-5p, miR-1260b, miR-145-3p, miR-378c, miR-181a-2-3p, miR-16-5p, miR-103b, miR-876-3p, let-7g-3p, miR-23a-5p, miR-485-5p, miR-301, miR-137-3p, miR-200a-5p, miR-374c-3p, miR-199a-5p, miR-154b-5p, miR-141-3p, miR-125a, miR-615-5p, miR-17-3p, miR-181b-5p, miR-107, miR-200a-3p, novel_127, miR-1260a, miR-125a-3p, miR-664-3p, miR-339a, miR-1957a, novel_39, miR-199a-5p, miR-490-3p, miR-192-3p, miR-1271-3p, miR-4286, miR-2284f, let-7a-2-3p, miR-3591-5p, miR-1343-5p, miR-23b-5p, miR-322-5p, miR-378h, miR-483-3p, miR-299a-3p, miR-423-3p, novel_79, novel_1, miR-502b, miR-4324, miR-15a, miR-576-3p, miR-1307-5p, miR-16a, miR-2284o, miR-323c, miR-24-3p, miR-199b-5p, miR-2428, miR-135a-2-3p, miR-17-3p, novel_101, miR-412-3p, miR-107, miR-7975, miR-195a-5p, miR-378f, miR-2285ab, miR-3141, miR-18a-3p, miR-323a-5p, miR-374c-3p, novel_69, miR-299b-3p, miR-320b, miR-483-3p, miR-452-5p, miR-1343-5p, miR-125a-5p, miR-7-5p, miR-3141, miR-455-5p, miR-136-3p, let-7a-2-3p, miR-503-3p, miR-668-3p, miR-363-5p, miR-138, miR-16b, miR-1260b, miR-26a-2-3p, miR-497-5p, miR-455-5p, miR-7862, miR-873a-5p, miR-432, miR-181a-5p, miR-7b-5p, miR-542-3p, miR-432-5p, miR-134-3p, miR-149-5p, novel_116, miR-103, miR-340-3p, miR-133b-5p, miR-103a-3p, miR-665, miR-339-5p, miR-487b-5p, miR-17-3p, miR-208b-5p, miR-424-5p, miR-2285j, miR-151-3p, miR-320e, miR-664a-5p, novel_44, miR-181c-5p, miR-378c, miR-4510, miR-214, let-7g-3p, miR-339b, miR-543-3p, miR-625-5p, miR-27b-5p, miR-129b-3p, miR-487b-5p, miR-27a-5p, miR-6130, miR-323-5p, miR-216b-5p, miR-204-3p, miR-15b-5p, miR-378a-3p, miR-221-5p, miR-296-3p, miR-466i-5p, miR-760-3p, miR-221-5p, miR-30b-3p, miR-299-3p, miR-21-3p, miR-185-3p, miR-125b, miR-122a, miR-29b-1-5p, miR-5100, miR-378i, miR-2300b-</p> |
| SDS    | ENSOARGOC serine d  | <p>miR-330-3p, miR-3600, miR-6516-5p, miR-2285g, miR-412-5p, miR-2285e, novel_121, miR-134-5p, miR-143-5p, miR-301b-5p, miR-134, miR-5703, miR-197-3p, miR-98-3p, miR-450b-5p, miR-101a-5p, miR-1388-5p, let-7a-3p, miR-6240, miR-3064-5p, miR-363-5p, miR-28b, miR-30c-1-3p, miR-26a-5p, miR-2285af, miR-30c-2-3p, miR-330-3p, miR-2898, miR-3085-3p, miR-3064-5p, miR-30c-1-3p, miR-26b-5p, miR-2285aa, miR-6516, miR-300-3p, miR-223-5p, miR-2285c, let-7f-1-3p, miR-381-3p, miR-412-3p, miR-767, miR-181a-3p, miR-9-3p, miR-485-5p, miR-1983, miR-9851-3p, novel_48, miR-452-5p, miR-98-3p, miR-323-3p, miR-6134, miR-181c-3p, miR-6402, miR-28c, novel_82, let-7b-3p, miR-301a-5p, miR-767-5p, miR-4726-5p, miR-134-5p, miR-625-3p, miR-138-5p, miR-494-5p, miR-2332, miR-331-3p, miR-125b-5p, miR-1260b, miR-145-3p, miR-378c, miR-181a-2-3p, miR-16-5p, miR-103b, miR-876-3p, let-7g-3p, miR-23a-5p, miR-485-5p, miR-301, miR-137-3p, miR-200a-5p, miR-374c-3p, miR-199a-5p, miR-154b-5p, miR-141-3p, miR-125a, miR-615-5p, miR-17-3p, miR-181b-5p, miR-107, miR-200a-3p, novel_127, miR-1260a, miR-125a-3p, miR-664-3p, miR-339a, miR-1957a, novel_39, miR-199a-5p, miR-490-3p, miR-192-3p, miR-1271-3p, miR-4286, miR-2284f, let-7a-2-3p, miR-3591-5p, miR-1343-5p, miR-23b-5p, miR-322-5p, miR-378h, miR-483-3p, miR-299a-3p, miR-423-3p, novel_79, novel_1, miR-502b, miR-4324, miR-15a, miR-576-3p, miR-1307-5p, miR-16a, miR-2284o, miR-323c, miR-24-3p, miR-199b-5p, miR-2428, miR-135a-2-3p, miR-17-3p, novel_101, miR-412-3p, miR-107, miR-7975, miR-195a-5p, miR-378f, miR-2285ab, miR-3141, miR-18a-3p, miR-323a-5p, miR-374c-3p, novel_69, miR-299b-3p, miR-320b, miR-483-3p, miR-452-5p, miR-1343-5p, miR-125a-5p, miR-7-5p, miR-3141, miR-455-5p, miR-136-3p, let-7a-2-3p, miR-503-3p, miR-668-3p, miR-363-5p, miR-138, miR-16b, miR-1260b, miR-26a-2-3p, miR-497-5p, miR-455-5p, miR-7862, miR-873a-5p, miR-432, miR-181a-5p, miR-7b-5p, miR-542-3p, miR-432-5p, miR-134-3p, miR-149-5p, novel_116, miR-103, miR-340-3p, miR-133b-5p, miR-103a-3p, miR-665, miR-339-5p, miR-487b-5p, miR-17-3p, miR-208b-5p, miR-424-5p, miR-2285j, miR-151-3p, miR-320e, miR-664a-5p, novel_44, miR-181c-5p, miR-378c, miR-4510, miR-214, let-7g-3p, miR-339b, miR-543-3p, miR-625-5p, miR-27b-5p, miR-129b-3p, miR-487b-5p, miR-27a-5p, miR-6130, miR-323-5p, miR-216b-5p, miR-204-3p, miR-15b-5p, miR-378a-3p, miR-221-5p, miR-296-3p, miR-466i-5p, miR-760-3p, miR-221-5p, miR-30b-3p, miR-299-3p, miR-21-3p, miR-185-3p, miR-125b, miR-122a, miR-29b-1-5p, miR-5100, miR-378i, miR-2300b-</p> |

miR-432-5p, miR-235b-3p, miR-130a-3p, miR-30b-3p, miR-7862, miR-873a-5p, miR-145a-5p, miR-654-3p, miR-130b-5p, miR-363-5p, miR-1343-5p, miR-224-5p, miR-34b, miR-670-3p, miR-323a-5p, miR-2404, miR-146b-3p, miR-450b-3p, miR-6516-3p, miR-2285ab, miR-378b, miR-376b-3p, miR-18a-3p, miR-211, miR-326-3p, miR-449a, novel\_1, miR-22-5p, miR-6402, miR-502-5p, miR-34c, miR-483-3p, miR-582-3p, miR-7641, let-7a-2-3p, miR-218-2-3p, miR-28b, miR-1271-3p, miR-2284a, miR-4286, miR-181a-2-3p, miR-200c-3p, miR-2898, miR-543-5p, miR-200c, miR-376b-3p, miR-339a, miR-3965, miR-34c-5p, miR-215-5p, miR-615-5p, miR-370-3p, miR-598-3p, let-7g-3p, miR-485-5p, miR-671-5p, miR-7144-5p, miR-362-5p, miR-3154, miR-500b-5p, miR-103b, miR-6128, miR-28-5p, miR-486b-3p, miR-204-5p, miR-135a-1-3p, miR-331-3p, miR-9788-3p, miR-500-5p, miR-216a-3p, miR-2300a-5p, miR-222-5p, miR-2426, miR-3120-5p, miR-143-5p, miR-30b-3p, let-7c-3p, novel\_124, miR-3085-3p, miR-5126, novel\_103, miR-1306-5p, miR-326, miR-376d, miR-20a-3p, miR-3064-5p, miR-664b, miR-7977, novel\_94, miR-361-3p, miR-362-5p, novel\_60, miR-3059-5p, miR-452-5p, miR-2285f, miR-335, miR-2285t, miR-7134-3p, miR-2285n, miR-382-3p, miR-371a-5p, miR-222-5p, miR-383-5p, miR-532-3p, novel\_83, miR-199a-3p, miR-548e-3p, miR-3600, miR-1b-3p, miR-215-5p, miR-5703, miR-1197-5p, miR-124-3p, miR-29b-1-5p, miR-146a-5p, miR-2432, miR-2887, miR-760-3p, miR-221-5p, miR-34b-5p, miR-6130, miR-323-5p, miR-192-5p, miR-132-5p, miR-877-5p, miR-204-3p, miR-22-3p, miR-140-5p, miR-221-5p, miR-182-5p, miR-2312, novel\_99, miR-582-5p, miR-206-3p, miR-6134, miR-338-3p, miR-145a-3p, miR-4510, miR-1271, miR-6516-3p, miR-664a, miR-708-5p, miR-324-3p, miR-134-3p, miR-3431, miR-194-3p, miR-149-5p, novel\_116, miR-339-5p, miR-542-3p, miR-708-3p, miR-432, novel\_23, miR-22-3p, miR-2285r, let-7a-2-3p, miR-2332, miR-6402, miR-660-5p, miR-4286, miR-499a-5p, miR-660, novel\_116

NDST1 ENSOARGO(N-deacet

OSBPL1A ENSOARGO(oxystero

miR-193b-3p, miR-29c-3p, novel\_27, miR-301b-3p, miR-2428, miR-211, miR-323c, let-7i, miR-4324, miR-576-3p, miR-625-3p, miR-147-5p, novel\_1, miR-29a, miR-10a-5p, miR-3120-3p, novel\_68, miR-144-3p, miR-6535, miR-670-3p, miR-29a-3p, miR-3970, miR-150-5p, miR-1306, miR-216a-3p, miR-376b-3p, miR-376b-5p, miR-148a-3p, miR-2387, miR-18b, miR-135b-5p, let-7e-5p, miR-6516-3p, miR-412-3p, miR-382, miR-130b-5p, miR-493-5p, miR-2331-5p, novel\_51, miR-125a-5p, miR-193a-3p, miR-130a-3p, miR-377-5p, miR-187-3p, miR-133b-5p, miR-2355-3p, miR-412-5p, miR-3535, miR-185-5p, miR-134-3p, let-7g-5p, miR-431-3p, miR-3071-5p, miR-708-3p, miR-1285, miR-1434-3p, miR-29b, miR-219a-1-3p, miR-1260b, miR-193a-5p, miR-133a-3p, miR-1260b, miR-144, miR-125b-5p, miR-135a-5p, miR-29b-3p, miR-486b-3p, miR-134-5p, miR-204-5p, miR-2355-5p, miR-215-5p, miR-1271, miR-125a, miR-376c-3p, miR-300-3p, miR-769, miR-200a-5p, miR-18a, miR-488-3p, miR-7144-5p, miR-23a-5p, miR-329b, miR-2385-3p, miR-4286, miR-181a-2-3p, let-7g, miR-2284y, miR-1957a, miR-1271-3p, miR-192-3p, miR-2478, let-7c-5p, miR-376b-3p, miR-1260a, miR-2285af, miR-125a-3p, miR-200c, miR-219-3p, miR-543-5p, miR-152-3p, miR-2898, miR-200c-3p, let-7f-5p, miR-18b-5p, miR-2285ad, miR-6517, miR-429-3p, miR-134-5p, miR-545-5p, novel\_121, miR-29d-3p, miR-23b-5p, miR-134, miR-200b-3p, miR-128-3p, miR-10a-5p, let-7d, miR-582-3p, miR-452-5p, miR-2447, miR-219a-2-3p, miR-371a-5p, miR-769-5p, miR-107-5p, novel\_82, miR-3968, miR-499a-5p, miR-541-5p, miR-7977, miR-211-5p, miR-2284g, miR-139-5p, let-7d-5p, miR-376d, miR-378g, miR-3082-5p, miR-361-3p, miR-140-5p, miR-376a-3p, miR-493-5p, miR-1983, miR-2284b, miR-1388-3p, let-7a-5p, miR-124a, miR-2330-5p, miR-29b-1-5p, miR-199a-3p, miR-1306-5p, miR-103a-2-5p, let-7e, miR-130b-3p, miR-5010-3p, miR-0788-3p, miR-148b-5p, miR-155-3p, miR-121, miR-376b-

miR-760-3p, miR-34b-5p, miR-221-5p, miR-30b-3p, miR-299-3p, miR-216a-5p, miR-125b, miR-2432, miR-2411, miR-378d, novel\_133, miR-362-3p, miR-2300b-3p, miR-1246, miR-2904, miR-1197-5p, miR-5703, miR-140-3p, miR-487a-3p, miR-15a-5p, miR-532-3p, miR-3600, miR-485-3p, miR-450b-3p, miR-17-3p, miR-664a, miR-424-5p, miR-708-5p, miR-10b-5p, miR-338-3p, miR-378c, miR-145a-3p, miR-4510, miR-425-5p, let-7g-3p, miR-154b-3p, miR-544-3p, miR-27a-5p, miR-6130, novel\_32, miR-204-3p, miR-221-5p, miR-378a-3p, miR-660-5p, miR-3065-3p, miR-3085-3p, miR-326, miR-1306-5p, miR-362-3p, miR-4532, miR-382-3p, miR-2330-5p, miR-424-5p, miR-378c, miR-544a, miR-484, miR-378b, miR-10b, miR-125b-2-3p, miR-30b-3p, miR-9788-3p, novel\_4, miR-2300a-5p, miR-5010-3p, miR-2284q, miR-2285y, miR-541-3p, miR-1296-5p, miR-361-3p, miR-199b-5p, miR-378e, miR-3064-5p, miR-452-3p, miR-10b, miR-7977, miR-17-3p, miR-1260a, miR-6119-5p, miR-28b, miR-199a-5p, miR-3065-3p, miR-490-3p, miR-1271-3p, miR-2284a, miR-3529-3p, miR-4286, miR-181a-2-3p, miR-128-3p, miR-10a-5p, let-7a-2-3p, miR-134, miR-218-2-3p, miR-378h, miR-483-3p, miR-2411-5p, miR-545-5p, miR-423-3p, miR-138-5p, miR-204-5p, miR-486b-3p, miR-28-5p, miR-331-3p, miR-323-3p, miR-378c, let-7g-3p, miR-7144-5p, miR-23a-5p, miR-485-5p, miR-488-3p, miR-3154, miR-34c-5p, miR-199a-5p, miR-487a-3p, miR-370-3p, miR-125a-5p, miR-660, miR-197-5p, miR-330-3p, miR-654-3p, miR-539-3p, miR-130b-5p, miR-363-5p, miR-138, miR-30b-3p, miR-1260b, miR-7862, miR-374b-3p, miR-145a-5p, miR-185-5p, miR-544b, miR-133b-5p, miR-377-5p, novel\_1, miR-15a, miR-502-5p, miR-6402, miR-34c, miR-16a, miR-211, miR-371b-3p, miR-323c, miR-1307-3p, miR-24-3p, miR-326-3p, novel\_27, miR-449a, miR-2428, miR-135a-2-3p, miR-2285x, novel\_101, miR-17-3p, miR-1291, miR-450b-3p, miR-7975, miR-6395, miR-195a-

novel\_83, miR-148b-3p, miR-340-5p, miR-15a-5p, miR-3600, miR-548e-3p, miR-148a-5p, miR-34a-5p, miR-16-1-3p, miR-1197-5p, miR-5703, miR-2904, miR-2300b-3p, miR-376a-5p, novel\_133, miR-143-3p, miR-2432, miR-181b-1-3p, miR-345-3p, miR-183-5p, miR-329a-5p, miR-34b-5p, miR-466i-5p, miR-202-5p, miR-345-3p, miR-185-3p, miR-500a-5p, miR-2285p, miR-196a-3p, miR-15b-5p, miR-6130, miR-6516, miR-301a-3p, miR-532-5p, miR-3065-3p, miR-216b-3p, miR-30c-1-3p, miR-140-5p, miR-1827, miR-345-5p, miR-18a-5p, miR-2312, miR-433-3p, miR-2285c, miR-450a-1-3p, miR-21a-3p, miR-6134, miR-3184-5p, miR-224-5p, miR-129-2-3p, miR-4510, miR-539-5p, miR-454-3p, miR-4492, miR-424-5p, miR-17-3p, miR-664a, miR-450b-3p, miR-29b-2-5p, miR-665, miR-320e, miR-222-3p, miR-2285e, miR-421, miR-9788-3p, miR-148b-5p, miR-221-3p, miR-455-3p, miR-147a, miR-376b-3p, miR-181b-2-3p, miR-145b, miR-2300a-5p, novel\_4, miR-409b, miR-330-3p, miR-2284aa, miR-1388-5p, miR-758-3p, miR-30b-3p, miR-501-3p, miR-2284r, miR-484, miR-491-3p, miR-758-3p, miR-1b-5p, miR-2310, miR-30c-1-3p, miR-424-5p, miR-130b-3p, miR-16b, miR-2957, miR-326, miR-376d, miR-500-3p, miR-489, miR-499a-3p, miR-7857-3p, miR-126b-5p, miR-499b-5p, miR-1983, miR-376a-3p, miR-221, miR-140-5p, miR-361-3p, miR-502-3p, miR-423-5p, novel\_111, miR-9-5p, miR-219a-5p, miR-452-5p, miR-2285f, miR-212-3p, miR-374a-3p, miR-335, miR-4726-5p, miR-2440, miR-129-1-3p, miR-450a-1-3p, miR-582-3p, miR-2284z, miR-545-5p, miR-6516-5p, miR-322-5p, miR-9-5p, miR-505-5p, miR-18b-5p, miR-6517, miR-222, miR-128-3p, miR-330-5p, miR-501-3p, miR-29d-3p, miR-345-3p, miR-3065-3p, novel\_39, miR-148b-5p, miR-29b-2-5p, miR-152-3p, miR-107, miR-127-5p, miR-17-3p, miR-30c-2-3p, miR-2397-5p, miR-6119-5p, miR-376b-3p, miR-133c, miR-34c-5p, miR-2285aa, miR-1814c, miR-7144-5p, miR-345-5p, miR-767, miR-876-3p, miR-18a, miR-301, miR-145-

miR-17-3p, novel\_101, miR-449a, novel\_27, miR-2428, miR-34c, miR-382-5p, miR-425-5p, miR-576-3p, miR-128-1-5p, miR-320b, novel\_68, miR-146b-3p, miR-2404, miR-299b-3p, novel\_69, miR-34b, miR-18b, miR-148a-3p, miR-378f, miR-363-5p, miR-668-3p, miR-628-5p, miR-539-3p, miR-432-3p, miR-2284l, miR-197-5p, miR-6238, miR-149-5p, miR-544b, miR-432-5p, miR-185-5p, miR-134-3p, miR-3071-5p, miR-145a-5p, miR-432, miR-19b-2-5p, miR-138, miR-219a-1-3p, miR-133a-3p, miR-378c, miR-145-3p, miR-6740-5p, miR-135a-1-3p, miR-410-3p, miR-31-3p, miR-3432a, miR-28-5p, miR-138-5p, miR-598-3p, miR-615-5p, miR-3956, miR-487a-3p, miR-874-3p, miR-324-5p, miR-300-3p, miR-34c-5p, miR-137-3p, miR-18a, miR-488-3p, miR-7144-5p, miR-10b-3p, miR-876-3p, miR-30a-3p, miR-3064-5p, miR-181a-2-3p, miR-4286, novel\_39, miR-30c-2-3p, miR-125a-3p, novel\_96, miR-152-3p, miR-17-3p, miR-450a-2-3p, miR-412, miR-18b-5p, miR-299a-3p, miR-378h, miR-3591-5p, miR-6527, miR-1296-5p, miR-4454, miR-3059-5p, miR-361-3p, miR-2284q, miR-154-3p, miR-499b-5p, miR-3064-5p, miR-4792, miR-378e, miR-378g, miR-140-5p, miR-544-5p, miR-877-3p, miR-652-5p, miR-376b, miR-4532, miR-30c-1-3p, miR-378d, novel\_19, miR-3085-3p, novel\_124, miR-491-5p, miR-487b-5p, miR-3955-3p, miR-145b, miR-412-3p, miR-378b, miR-296-5p, miR-101c, miR-3120-5p, miR-378c, miR-544a, miR-2330-3p, miR-378c, miR-539-5p, miR-145a-3p, miR-346, miR-30a-3p, miR-19b-1-5p, miR-665, miR-320e, miR-30e-3p, miR-874-5p, miR-487a-5p, miR-708-5p, miR-17-3p, miR-487b-5p, miR-154a-3p, miR-140-5p, miR-30c-1-3p, miR-2331-3p, miR-378a-3p, novel\_32, miR-151b, miR-544-3p, miR-598-3p, miR-625-5p, miR-133b-3p, miR-18a-5p, miR-154b-3p, miR-487a, miR-324-3p, miR-216a-5p, miR-422a, miR-196a-3p, novel\_17, miR-210-5p, miR-34b-5p, miR-299-3p, miR-485-3p, miR-30d-3p, novel\_83, miR-151-5p, miR-1247-5p, miR-487a-

miR-378h, miR-1271-5p, miR-134-5p, miR-2284z, miR-2285ad, miR-6517, miR-412, miR-7641, miR-18b-5p, miR-128-3p, miR-615-3p, miR-345-3p, miR-134, miR-330-5p, miR-2478, miR-199a-5p, novel\_39, miR-2284y, miR-29a-5p, miR-2285b, miR-2284a, miR-450a-2-3p, miR-2898, miR-1a-2-5p, novel\_127, miR-543-5p, novel\_96, miR-1260a, miR-199a-5p, miR-2284n, miR-2355-5p, miR-370-3p, miR-485-5p, miR-671-5p, miR-18a, miR-1260b, miR-378c, novel\_42, miR-2284v, miR-592, miR-134-5p, miR-2284k, miR-1-5p, miR-370-5p, miR-409-3p, miR-412-5p, miR-2284d, miR-134-3p, miR-194-3p, miR-31-5p, miR-2284ab, miR-1260b, miR-708-3p, miR-653, miR-542-3p, miR-432-3p, miR-6240, miR-193a-3p, miR-3141, miR-330-3p, miR-2411-3p, miR-411b-3p, miR-669, miR-3074-5p, miR-1291, miR-9851-3p, miR-505-3p, miR-378f, miR-18b, miR-3141, miR-216a-3p, miR-3591-3p, miR-18a-3p, miR-326-3p, novel\_27, miR-199b-5p, miR-1a-1-5p, miR-193b-3p, miR-2285x, miR-1193, miR-421-5p, miR-6123, miR-576-3p, miR-382-5p, miR-95-3p, miR-23c, miR-532-3p, miR-2284h-5p, miR-18a-3p, miR-505-3p, miR-212-5p, miR-493-3p, miR-378d, miR-2284u, novel\_133, miR-378i, miR-2904, miR-378a-3p, miR-140-3p, miR-1193, miR-188-3p, miR-2285w, miR-2284m, miR-30b-3p, miR-500a-5p, miR-422a, miR-345-3p, miR-185-3p, miR-193b-3p, miR-6130, miR-2331-3p, miR-378a-3p, miR-21-3p, miR-370-5p, miR-18a-5p, miR-543-3p, miR-346, miR-338-3p, miR-378c, miR-539-5p, miR-4510, miR-3074-5p, miR-1271, miR-2330-3p, miR-4492, miR-874-5p, miR-216a-3p, miR-9788-3p, miR-330-3p, miR-378c, miR-2284aa, miR-378b, miR-143-5p, miR-412-3p, miR-323b, miR-758-3p, miR-125b-2-3p, miR-378d, miR-8485, miR-3187-3p, miR-758-3p, miR-2330-5p, miR-382-3p, miR-2284b, miR-491-5p, miR-199b-5p, miR-103a-2-5p, miR-326, novel\_115, miR-323b-3p, miR-378e, miR-378g, miR-489, miR-202-3p, miR-2284g, miR-541-5p, miR-7977, miR-96-5p, miR-



miR-106a-5p, miR-17-5p, miR-1343-5p, let-7f-2-3p, let-7f-2-3p, miR-382, miR-22841, miR-654-3p, miR-432-3p, miR-223-3p, miR-1434-3p, miR-145a-5p, miR-16-1-3p, miR-219a-1-3p, miR-380-3p, miR-29b, miR-16b, miR-497-5p, miR-31-5p, miR-339-5p, miR-3431, miR-20b, novel\_116, miR-20a-5p, miR-6402, miR-15a, miR-16a, miR-206, miR-29a, miR-22-5p, miR-656-5p, miR-625-3p, miR-203b-5p, miR-335-5p, miR-1a-1-5p, miR-29c-3p, miR-1193, miR-24-3p, miR-211, miR-2284w, miR-326-3p, miR-148a-3p, miR-3065-5p, miR-412-3p, miR-195a-5p, miR-2319a, miR-3074-5p, miR-26b-5p, miR-10a-5p, miR-29a-3p, miR-374c-3p, miR-6119-5p, miR-219-3p, miR-2285af, miR-217, miR-339a, miR-30c-2-3p, miR-127-5p, miR-1a-2-5p, miR-152-3p, miR-1, miR-30a-3p, miR-495-5p, miR-29b-2-5p, miR-3065-3p, miR-1957a, miR-1290, miR-30a-5p, miR-330-5p, miR-1343-5p, miR-29d-3p, miR-10a-5p, miR-155-5p, miR-30c, novel\_79, miR-322-5p, miR-214-5p, miR-370-5p, miR-29b-3p, miR-409-3p, miR-331-3p, novel\_9, miR-204-5p, miR-16-5p, miR-3607-3p, miR-1197-3p, miR-93, miR-30e-5p, miR-23b, miR-17-5p, miR-93-5p, miR-20b-5p, miR-365a-3p, miR-3959-5p, novel\_103, miR-326, miR-106b-5p, miR-16b, miR-2957, miR-424-5p, miR-106a-5p, miR-376b, miR-23a-3p, miR-30c-1-3p, miR-1b-5p, miR-8485, miR-10b, miR-484, miR-125b-2-3p, miR-1a-3p, miR-16-2-3p, miR-151a-3p, miR-145b, miR-5010-3p, miR-421, miR-1185-3p, miR-101-3p, miR-30b-5p, miR-335, miR-499a-5p, miR-2447, novel\_111, miR-219a-2-3p, miR-423-5p, miR-504, miR-1983, novel\_94, miR-2319b, miR-139-5p, miR-211-5p, miR-7689-3p, miR-3082-5p, miR-1185-2-3p, miR-618, miR-2285p, miR-26a-5p, miR-30b, miR-106a, miR-221-5p, miR-30d, miR-20a, miR-195a-3p, miR-130a-5p, miR-380-3p, miR-30c-5p, miR-5703, miR-217-5p, miR-16-1-3p, miR-106a, miR-30d-3p, miR-3600, miR-148b-3p, miR-23c, miR-15a-5p, miR-23b-3p, miR-30a-3p, miR-2285i, miR-29b-2-5p, miR-664a-1-5p, miR-212-3p, miR-29b-2-5p, miR-3607-3p, miR-142a-3p, miR-29b-1-5p, miR-200a, miR-5100, miR-29b-2-5p, miR-29b-1-5p, miR-30d, miR-142-3p, miR-216a-3p, miR-455-3p, miR-199a-3p, miR-30e-5p, miR-30d-5p, miR-582-3p

PSMA6

ENSOARGO( proteaso

PGM3

ENSOARGO( phosphog

miR-219b-5p, miR-500a-5p, miR-34b-3p, miR-122-3p, miR-210-5p, miR-2424, miR-329a-5p, miR-503-5p, miR-2285w, miR-361-5p, miR-2284u, miR-148a-5p, miR-2284h-5p, miR-23b-3p, miR-7859, miR-23c, miR-4492, novel\_74, miR-665, miR-3604, miR-2285j, miR-181c-5p, miR-665-5p, miR-625-5p, miR-885-3p, miR-1895, miR-1827, miR-186-5p, miR-339b, miR-345-5p, miR-129b-3p, miR-450a-1-3p, miR-499b-3p, miR-2284s, miR-377-3p, miR-10a, miR-582-5p, miR-30c-1-3p, miR-1277-3p, miR-29b-1-5p, miR-323b-3p, miR-182-5p, miR-23a-3p, miR-744-3p, miR-2284b, miR-101b-3p, miR-21b, miR-362-3p, miR-758-3p, miR-2284r, miR-329-3p, miR-455-3p, miR-148b-5p, miR-1185-3p, miR-147a, miR-3964, miR-628-3p, novel\_82, miR-2440, miR-101-3p, miR-877-3p, miR-2284j, miR-493-5p, miR-1983, miR-381-3p, miR-203-3p, miR-1185-2-3p, miR-499a-3p, miR-211-5p, miR-139-5p, miR-2284g, miR-2319b, miR-200a-3p, miR-30f, miR-200a, miR-2284y, miR-450c-5p, miR-3064-5p, miR-885-3p, miR-196a-5p, miR-1290, miR-450a-1-3p, miR-134-5p, miR-758-5p, novel\_79, miR-1224-5p, miR-299a-3p, miR-134-5p, miR-2284k, miR-193a-5p, miR-2284v, miR-345-5p, miR-329b, miR-329a, miR-23b, miR-2285aa, miR-503-3p, miR-874-3p, miR-196b-5p, miR-483-3p, miR-365b-5p, novel\_51, miR-2411-3p, miR-7-5p, miR-377-3p, let-7j, miR-432-3p, miR-2285r, miR-432-3p, miR-493-5p, miR-4508, miR-2284x, miR-27b-3p, miR-450c-3p, miR-7b-5p, novel\_116, miR-3431, miR-339-5p, miR-3955-5p, miR-31-5p, miR-6119-3p, miR-29a, miR-576-3p, miR-28c, miR-29c-3p, miR-412-3p, miR-150-5p, miR-3591-3p, miR-320c, miR-144-3p, miR-374c-3p, miR-299b-3p, miR-3120-3p, miR-329-5p, miR-30b-3p, miR-299-3p, miR-21-3p, miR-2284m, miR-320d, miR-466i-5p, miR-760-3p, miR-216a-5p, miR-185-3p, miR-29b-1-5p, miR-130a-5p, miR-19b-3p, miR-4429, miR-5703, miR-140-3p, miR-1193, novel\_133, miR-362-3p, miR-2300b-3p, miR-215-5p, miR-214, miR-141-3p, miR-221-5p, miR-429-3p, miR-200b-3p, miR-221-5p, miR-214-3p, miR-21-3p, miR-200a-3p, miR-138-5p, miR-138, miR-200c-3p, miR-200c

miR-320b, let-7d-5p, miR-6535, novel\_69, miR-378g, miR-129b-5p, miR-1306, miR-2387, miR-3141, miR-361-3p, miR-140-5p, let-7e-5p, miR-1983, miR-195a-5p, miR-412-3p, miR-668-5p, miR-9-5p, miR-541-3p, miR-3956-3p, novel\_60, miR-423-5p, miR-326-3p, miR-371b-3p, miR-361-3p, let-7i, miR-16a, novel\_82, miR-15a, miR-4726-5p, miR-5010-3p, miR-1343-3p, miR-2285e, miR-134-3p, let-7g-5p, miR-147a, miR-496-5p, miR-2285g, novel\_23, miR-542-3p, miR-541, miR-7862, miR-744-5p, miR-497-5p, miR-4508, miR-16b, miR-628-5p, miR-424-5p, let-7a-5p, miR-1388-3p, novel\_51, miR-16b, miR-3141, miR-29b-1-5p, novel\_103, miR-1306-5p, miR-5126, miR-326, let-7e, miR-125a-5p, miR-483-3p, miR-196b-5p, miR-1271, miR-215-5p, miR-125a, miR-370-3p, miR-140-5p, miR-15b-5p, let-7i-5p, novel\_32, miR-192-5p, miR-2285c, miR-1827, miR-885-3p, miR-1895, miR-665-5p, miR-16-5p, let-7b, let-7b-5p, miR-3184-5p, miR-665, miR-125b-5p, miR-331-3p, let-7f, miR-486b-3p, miR-424-5p, miR-874-5p, miR-4492, miR-214-5p, miR-582-3p, miR-532-3p, miR-483-3p, miR-15a-5p, miR-9-5p, miR-322-5p, miR-330-5p, miR-2904, miR-1961, miR-215-5p, miR-2408, miR-196a-5p, novel\_133, miR-378d, miR-582-3p, let-7d, miR-885-3p, miR-4286, miR-486-3p, let-7g, miR-29b-1-5p, miR-185-3p, miR-125b, let-7c-5p, miR-324-3p, let-7k, miR-466i-5p, miR-98-5p, let-7f-5p, miR-2284r, miR-2904, miR-191-3p, miR-504, miR-2285k, miR-3085-3p, miR-4492, miR-874-3p, miR-504-5p, miR-3064-5p, miR-3064-5p, miR-2285i, miR-1271-3p, miR-151b, miR-151-5p

DCAF15 ENSOARGO(DDB1 and

PLXNA1 ENSOARGO(plexin A

miR-382-5p, let-7i, miR-4324, miR-199c, miR-22-5p, miR-17-3p, miR-342-3p, miR-3959-3p, miR-24-3p, miR-371b-3p, miR-1306, miR-2387, let-7e-5p, miR-146b-5p, miR-9851-3p, miR-412-3p, miR-450b-3p, miR-3120-3p, miR-26b-5p, miR-329-5p, novel\_68, let-7d-3p, miR-146a, miR-7-5p, miR-101-5p, miR-2285r, miR-181a-5p, miR-7b-5p, miR-432, miR-2889, miR-2284x, miR-138, miR-544b, miR-194-3p, miR-3431, let-7g-5p, miR-432-5p, novel\_63, miR-2284k, miR-134-5p, miR-374b-3p, miR-138-5p, miR-374a-3p, miR-137-3p, miR-381-3p, miR-30e-5p, miR-329a, miR-329b, miR-1271, miR-874-3p, miR-769, let-7c-5p, miR-30f, miR-125a-3p, miR-664-3p, let-7f-5p, miR-181b-5p, miR-17-3p, miR-2284a, let-7g, miR-3065-3p, miR-2284y, miR-30a-5p, miR-2427, miR-134, miR-3591-5p, miR-30c, miR-300, let-7d, miR-6517, miR-129-1-3p, novel\_121, miR-134-5p, miR-2411-5p, miR-107-5p, miR-301a-5p, miR-769-5p, miR-371a-5p, miR-30b-5p, miR-374a-3p, miR-181d-5p, miR-452-5p, miR-1983, miR-544-5p, miR-299b-5p, miR-20a-3p, miR-452-3p, miR-664b, let-7d-5p, miR-3596, miR-7857-3p, miR-499a-3p, miR-362-3p, miR-1306-5p, miR-342, miR-199a-3p, miR-103a-2-5p, let-7e, miR-146b, miR-2284b, miR-382-3p, let-7a-5p, miR-574-3p, miR-491-3p, miR-8485, miR-301b-5p, miR-484, miR-329-3p, miR-544a, miR-362-3p, miR-199b-3p, miR-1343-3p, novel\_78, miR-216a-3p, let-7f, miR-2285j, miR-17-3p, miR-129-2-3p, let-7b, miR-181c-5p, let-7b-5p, miR-769-5p, miR-30d-5p, miR-21a-3p, miR-552-3p, miR-3065-3p, let-7i-5p, miR-499b-3p, miR-544-3p, miR-26a-5p, miR-30b, let-7k, miR-30d, miR-3653-3p, miR-760-3p, miR-98-5p, miR-2284m, miR-329a-5p, miR-216c-5p, miR-146a-5p, miR-2411, miR-188-3p, miR-362-3p, miR-1961, miR-30c-5p, novel\_133, miR-378d, miR-548e-3p, miR-199a-3p, miR-7859, miR-454-3p, miR-204-5p, miR-191-5p, novel\_63, miR-29b-3p, miR-30e-3p, miR-324-3p, miR-30a-3p, miR-100-3p, miR-10b-5p, miR-93, miR-1197-3p, miR-224-5p, miR-144-5p, miR-18a-5p, miR-20b-5p, miR-625-5p, miR-671-5p, novel\_99, miR-488-3p, miR-93-5p, miR-18a, miR-17-5p, miR-433-3p, miR-10a, miR-301a-3p, miR-216b-5p, novel\_25, miR-204-3p, miR-3065-3p, miR-141-3p, miR-532-5p, miR-2898, miR-106a, miR-200c-3p, miR-21-3p, miR-200a-3p, miR-152-3p, miR-200c, novel\_17, miR-148b-5p, miR-200a, miR-3065-3p, miR-192-3p, miR-20a, miR-30a-3p, miR-200b-3p, miR-148a-5p, miR-10a-5p, miR-615-3p, miR-191, miR-1246, miR-29d-3p, miR-23b-5p, miR-505-5p, miR-302a-5p, miR-200b, miR-148b-3p, miR-1247-5p, novel\_121, miR-106a, miR-429-3p, miR-6517, miR-30d-3p, miR-18b-5p, miR-335, miR-29a, miR-2285t, miR-615, miR-20a-5p, miR-301a-5p, miR-211, miR-301b-3p, miR-2447, miR-342-3p, miR-3059-5p, miR-885-5p, miR-335-5p, miR-29c-3p, novel\_94, miR-148a-3p, miR-18b, miR-29a-3p, miR-144-5p, miR-2319b, miR-10b, miR-320b, miR-499b-5p, miR-10a-5p, miR-211-5p, miR-130b-3p, miR-342, miR-296-3p, miR-106b-5p, miR-106a-5p, miR-17-5p, miR-2331-5p, miR-296-3p, miR-503-3p, miR-106a-5p, miR-676-3p, miR-101-5p, miR-668-3p, miR-363-5p, miR-29b, miR-101c, miR-10b, miR-301b-5p, miR-374b-3p, miR-3431, miR-148b-5p, novel\_116, miR-20b, miR-421, miR-1343-3p, miR-130a-3p

|        |                    |                                                                                                                                                                                                                                                                                                                                                                                                                                                                                                                                                                                                                                                                                                                                                                                                                                                                                                                                                                                                                                                                                                                                                                                                                                                                                                                                                                              |
|--------|--------------------|------------------------------------------------------------------------------------------------------------------------------------------------------------------------------------------------------------------------------------------------------------------------------------------------------------------------------------------------------------------------------------------------------------------------------------------------------------------------------------------------------------------------------------------------------------------------------------------------------------------------------------------------------------------------------------------------------------------------------------------------------------------------------------------------------------------------------------------------------------------------------------------------------------------------------------------------------------------------------------------------------------------------------------------------------------------------------------------------------------------------------------------------------------------------------------------------------------------------------------------------------------------------------------------------------------------------------------------------------------------------------|
| SPTA1  | ENSOARGO(spectrin) | <p>miR-320a, miR-23b, miR-136-5p, miR-10b-3p, miR-6516-3p, miR-1248, miR-543-3p, miR-3074-1-3p, miR-7975, miR-20a-3p, miR-299b-3p, miR-376e-3p, miR-376c-3p, miR-877-5p, miR-22-3p, miR-144-3p, miR-301a-5p, miR-144, miR-26c, miR-2285y, miR-155-5p, novel_1, novel_74, miR-31-3p, miR-6525, miR-301b-5p, miR-7b-5p, miR-1290, miR-873a-5p, miR-188-3p, miR-22-3p, miR-323b, miR-4429, miR-155-5p, miR-299a-3p, miR-2285ad, miR-23c, miR-23b-3p, miR-2355-3p, novel_116, miR-205-5p, miR-7-5p, miR-320b, miR-323b-3p, miR-330-3p, miR-3955-3p, miR-491-5p, miR-2484, miR-299-3p, novel_96, miR-6240, miR-101b-3p, miR-33a-5p, miR-181a-2-3p, miR-23a-3p, miR-376a-5p, miR-143-3p, miR-8485</p> <p>miR-145b, miR-181b-2-3p, novel_4, miR-31-5p, miR-421, miR-544b, miR-9788-3p, miR-125b-2-3p, miR-145a-5p, miR-30b-3p, miR-541, miR-329-3p, miR-4508, miR-544a, miR-362-3p, miR-138, miR-30b-3p, miR-668-3p, miR-130b-5p, miR-1b-5p, miR-8485, miR-539-3p, miR-432-3p, novel_51, miR-362-3p, miR-1306-5p, miR-320b, miR-103a-2-5p, miR-106b-3p, miR-196b-5p, miR-211-5p, miR-499b-5p, miR-2319b, miR-378b, miR-329-5p, miR-20a-3p, miR-181b-3p, miR-677, miR-320c, miR-34b, miR-411b-3p, miR-670-3p, miR-381-3p, miR-1306, miR-18b, miR-505-3p, miR-2285x, miR-541-3p, miR-2284w, miR-449a, miR-877-3p, miR-211, miR-107-5p, miR-34c, miR-769-5p, miR-1307-5p, miR-101-</p> |
| NFKBIA | ENSOARGO(NF-kappa) | <p>3p, miR-4324, miR-147-5p, novel_1, miR-505-3p, miR-18b-5p, miR-485-3p, miR-532-3p, miR-487a-3p, miR-1193, miR-188-3p, miR-362-3p, miR-196a-5p, let-7a-3p, miR-34a-5p, miR-300, miR-4429, miR-345-3p, miR-329a-5p, miR-1271-3p, miR-29a-5p, miR-181b-1-3p, miR-130a-5p, miR-185-3p, miR-3071-3p, miR-21-3p, miR-34b-5p, miR-221-5p, miR-320d, miR-221-5p, miR-769, miR-544-3p, miR-2284s, miR-34c-5p, miR-320a, miR-18a, miR-129b-3p, miR-381-3p, miR-488-3p, miR-485-5p, miR-23a-5p, miR-329b, miR-329a, miR-18a-5p, miR-181a-2-3p, miR-1306-5p, miR-6134, miR-769-5p, miR-3969, miR-3604, miR-132-5p, miR-2332, miR-130b-5p, miR-204-5p, miR-129-5p, miR-664a, miR-138-5p</p> <p>miR-455-3p, miR-328-3p, novel_78, miR-1343-3p, miR-133b-5p, miR-30d-3p, miR-1260b, miR-4429, miR-128-3p, miR-22-3p, miR-432-3p, miR-432-3p, miR-486-3p, miR-3187-3p, miR-668-3p, miR-5100, miR-30a-3p, miR-181a-2-3p, miR-320d, miR-124-5p, miR-127-5p, miR-221-5p, miR-320b, miR-1260a, miR-210-5p, miR-216a-5p, miR-499a-3p, miR-499b-3p, miR-411b-3p, miR-</p>                                                                                                                                                                                                                                                                                                                       |
| POLR1C | ENSOARGO(polymera) | <p>320c, miR-22-3p, miR-454-5p, miR-221-5p, miR-452-3p, miR-2355-5p, miR-1271, miR-532-5p, miR-9-3p, miR-6395, miR-361-3p, miR-301, miR-216a-3p, miR-320a, miR-877-3p, miR-361-3p, miR-24-3p, miR-374a-3p, miR-1260b, miR-2428, miR-335-5p, miR-145a-3p, miR-2285x, novel_74, miR-664a, miR-335, miR-374a-3p, miR-874-5p, miR-486b-3p, miR-374b-3p, miR-101-3p, miR-30e-3p, miR-30a-3p, miR-320e</p>                                                                                                                                                                                                                                                                                                                                                                                                                                                                                                                                                                                                                                                                                                                                                                                                                                                                                                                                                                         |

miR-301a-3p, miR-877-5p, miR-21a-3p, miR-433-3p, miR-411, miR-129b-3p, miR-590-3p, miR-665-5p, miR-346, miR-320e, miR-6516-3p, miR-487b-5p, miR-454-3p, miR-4492, miR-129-5p, miR-708-5p, miR-106a, miR-148b-3p, miR-23c, miR-23b-3p, miR-199a-3p, miR-1434-5p, miR-4429, miR-33b-3p, miR-19b-3p, miR-493-3p, miR-361-5p, miR-218-1-3p, miR-345-3p, miR-20a, miR-421-5p, miR-29b-1-5p, miR-219b-5p, miR-500a-5p, miR-106a, miR-320d, miR-299-3p, miR-30b-3p, miR-452-3p, miR-24-1-5p, miR-664b, miR-499b-5p, miR-541-5p, miR-3082-5p, miR-7857-3p, miR-378g, miR-1185-2-3p, miR-4443, miR-668-5p, miR-544-5p, novel\_94, miR-493-5p, miR-219a-5p, miR-452-5p, miR-194b-5p, novel\_111, miR-8095, miR-2440, miR-3968, miR-421, miR-1185-3p, miR-106a-5p, miR-382-3p, miR-23a-3p, miR-2310, miR-320b, miR-199a-3p, miR-106b-5p, miR-29b-1-5p, miR-130b-3p, miR-1185-5p, miR-874-3p, miR-503-3p, miR-574-5p, miR-320a, miR-17-5p, miR-93-5p, miR-200a-5p, miR-2318, miR-329b, miR-767, miR-1814c, miR-7144-5p, novel\_48, miR-20b-5p, miR-3074-1-3p, miR-3607-3p, miR-93, miR-2332, miR-5100, novel\_9, miR-767-5p, miR-28-5p, miR-429-3p, miR-299a-3p, miR-411-3p, miR-24-2-5p, miR-2285b, miR-200c, miR-664-3p, miR-200c-3p, miR-152-3p, miR-3120-3p, miR-670-3p, miR-299b-3p, miR-320c, miR-148a-3p, miR-3065-5p, miR-19a-3p, miR-6516-3p, miR-495-3p, miR-301b-3p, novel\_27, miR-20a-5p, miR-379-3p, miR-421-5p, miR-22-5p, miR-3955-5p, miR-31-5p, miR-130a-3p, miR-134-3p, miR-2355-3p, miR-20b, miR-223-3p, miR-194-5p, miR-493-5p, miR-628-5p, miR-22841, miR-194a, miR-17-5p, miR-106a-5p, miR-197-5p

let-7f-5p, novel\_96, miR-152-3p, novel\_127, miR-3064-5p, miR-29a-5p, let-7g, novel\_39, miR-1343-5p, miR-330-5p, miR-155-5p, miR-299a-3p, miR-6517, novel\_79, miR-505-5p, miR-2284z, miR-134-5p, novel\_121, miR-2284k, miR-134-5p, miR-30e-5p, miR-93-5p, miR-767, miR-329b, miR-20b-5p, miR-1271, miR-146a, miR-105-5p, miR-365b-5p, novel\_51, miR-380-5p, miR-668-3p, miR-2285r, miR-432-3p, let-7j, miR-432, miR-1843b-5p, miR-2113, miR-16-1-3p, miR-27b-3p, miR-188-5p, miR-339-5p, miR-134-3p, miR-194-3p, miR-149-5p, miR-576-3p, miR-28c, miR-142b, miR-425-5p, miR-6119-3p, miR-29a, miR-625-3p, miR-421-5p, miR-758-5p, miR-29c-3p, miR-301b-3p, miR-148a-3p, miR-1306, miR-3591-3p, miR-412-3p, miR-146b-5p, miR-2319a, miR-378f, let-7e-5p, novel\_68, miR-216b-3p, miR-3120-3p, miR-411b-3p, novel\_69, miR-299b-3p, miR-6535, miR-2285p, miR-324-3p, miR-422a, miR-98-5p, let-7k, miR-421-5p, miR-486-3p, miR-143-3p, miR-30c-5p, miR-378i, miR-1961, miR-217-5p, miR-378a-3p, miR-33b-3p, miR-184-3p, miR-16-1-3p, miR-34a-5p, miR-361-5p, miR-18a-3p, miR-106a, miR-380-5p, miR-30d-3p, miR-210-3p, miR-328-3p, let-7f, miR-30e-3p, miR-30a-3p, miR-665, miR-500, miR-874-5p, miR-4492, miR-454-3p, let-7b, miR-665-5p, miR-6525, miR-224-5p, miR-3184-5p, miR-500a-3p, miR-30d-5p, miR-339b, miR-625-5p, miR-1895, miR-1827, miR-504-5p, miR-548o-3p, miR-216b-3p, miR-552-3p, miR-296-3p, miR-301a-3p, miR-499b-3p, let-7i-5p, miR-106b-5p, miR-182-5p, miR-491-5p, miR-130b-3p, miR-146b, miR-124a, miR-1388-3p, miR-378d, miR-8485, miR-2310, miR-199b-3p, miR-1343-3p, novel\_78, miR-2459, miR-3968, miR-2447, miR-2284j, miR-877-3p, miR-361-3p, miR-1285-5p, miR-423-5p, miR-221, miR-378j, miR-504, miR-335-3p, miR-1983, miR-4792, miR-2319b, miR-378g, miR-499a-3p, miR-217, let-7c-5p, miR-339a, miR-17-3p, miR-30a-3p, miR-181a-2-3p, miR-1286, miR-380-5p, miR-28b, miR-3065-3p, miR-181a-2-3p, miR-1286, miR-380-5p, miR-28b, miR-3065-3p, miR-296-5p, miR-873a-5p

TMEM61 ENSOARGOC transmem

CDK5RAP3 ENSOARGOC CDK5 reg

miR-15a-5p, miR-328-3p, miR-18a-3p, miR-212-5p, miR-34a-5p, miR-133a-3p, novel\_133, miR-378i, miR-378a-3p, miR-1197-5p, miR-29b-1-5p, miR-2285i, miR-486-3p, miR-202-5p, miR-34b-5p, miR-2285p, miR-125b, miR-185-3p, miR-422a, miR-324-3p, miR-216a-5p, miR-323-5p, miR-6130, miR-6516, miR-377-3p, miR-15b-5p, miR-504-5p, miR-140-5p, miR-378a-3p, miR-552-3p, miR-3065-3p, miR-345-5p, miR-133b-3p, miR-1827, novel\_44, miR-3184-5p, miR-4510, miR-3074-5p, miR-378c, miR-1271, miR-664a, miR-487b-5p, miR-17-3p, miR-130b-5p, miR-708-5p, miR-874-5p, miR-424-5p, miR-4492, miR-320e, miR-29b-2-5p, miR-324-3p, miR-147a, miR-2459, miR-409b, miR-378c, miR-541, miR-301b-5p, miR-378b, miR-296-5p, miR-378d, miR-1b-5p, miR-8485, miR-1839-3p, miR-424-5p, miR-487b-5p, miR-3085-3p, miR-326, miR-342, miR-16b, miR-29b-1-5p, miR-378g, miR-378e, miR-4443, miR-3064-5p, miR-7977, miR-504, miR-96-5p, miR-423-5p, miR-3956-3p, miR-541-3p, novel\_60, miR-452-5p, miR-4726-5p, miR-218-5p, miR-301a-5p, miR-6516-5p, miR-1271-5p, miR-378h, miR-322-5p, miR-6517, miR-1224-5p, miR-23b-5p, miR-330-5p, miR-29d-3p, novel\_39, miR-29a-5p, miR-3065-3p, miR-181a-2-3p, miR-29b-2-5p, miR-3064-5p, miR-17-3p, miR-2898, miR-543-5p, novel\_127, miR-125a-3p, miR-34c-5p, miR-154b-5p, miR-615-5p, miR-125a, miR-2355-5p, miR-345-5p, miR-485-5p, miR-378c, miR-133a-3p, miR-6128, miR-16-5p, miR-138-5p, miR-486b-3p, miR-28-5p, miR-29b-3p, miR-2433, miR-331-3p, miR-125b-5p, miR-134-3p, miR-412-5p, miR-544b, miR-2355-3p, miR-149-5p, miR-133b-5p, miR-340-3p, miR-16b, miR-138, miR-29b, miR-7862, miR-497-5p, miR-432-3p, miR-345-5p, miR-130b-5p, miR-363-5p, miR-378a-5p, miR-125a-5p, miR-377-3p, novel\_51, miR-29a-3p, miR-34b, miR-323a-5p, miR-146b-3p, miR-669, miR-3074-5p, miR-216b-3p, miR-2285k, miR-6395, miR-195a-5p, miR-378f, miR-2319a, miR-2327, miR-18a-3p, miR-326-3p, miR-



miR-708-5p, miR-874-5p, miR-664a, miR-320e, miR-665, miR-655-3p, miR-324-3p, miR-2285j, miR-6134, miR-206-3p, miR-346, miR-6525, miR-665-5p, miR-3184-3p, miR-145a-3p, miR-129-2-3p, miR-378c, miR-1827, miR-543-3p, miR-625-5p, miR-345-5p, miR-18a-5p, miR-2312, miR-411, miR-655, miR-129b-3p, miR-22-3p, miR-27a-5p, miR-376e-3p, miR-552-3p, miR-182-5p, miR-21-3p, miR-496-3p, miR-504-5p, miR-378a-3p, miR-299-3p, miR-30b-3p, miR-760-3p, miR-320d, miR-125b, miR-422a, miR-92a-1-5p, miR-500a-5p, miR-324-3p, miR-486-3p, miR-2432, miR-376c-3p, miR-345-3p, miR-183-5p, miR-378d, miR-664-5p, miR-4429, miR-378a-3p, miR-5703, miR-188-3p, miR-140-3p, miR-2904, miR-193b-5p, miR-376a-5p, miR-378i, novel\_133, miR-328-3p, miR-532-3p, miR-212-5p, miR-3958-3p, miR-4726-5p, miR-628-3p, miR-371a-5p, miR-2285y, novel\_82, miR-1285-5p, novel\_111, miR-877-3p, miR-2285f, miR-541-3p, novel\_94, miR-504, miR-1185-2-3p, miR-378e, miR-4792, miR-153-3p, novel\_124, miR-491-5p, miR-182-5p, novel\_19, miR-505, novel\_103, miR-1306-5p, miR-320b, miR-2310, miR-3187-3p, miR-8485, miR-378d, miR-744-3p, miR-1388-3p, miR-3120-5p, miR-378c, miR-143-5p, miR-541, miR-296-5p, miR-378b, miR-2284r, miR-6529a, miR-1185-3p, miR-2459, miR-9788-3p, miR-147a, miR-1298-3p, miR-496-5p, miR-153, miR-330-3p, miR-105-1, novel\_78, novel\_4, miR-134-5p, miR-28-5p, miR-486b-3p, miR-138-5p, miR-135a-5p, miR-125b-5p, miR-331-3p, miR-5100, miR-378c, miR-145-3p, miR-1197-3p, miR-1260b, miR-181a-2-3p, miR-485-5p, miR-1248, miR-1814c, miR-7144-5p, miR-23a-5p, miR-345-5p, miR-18a, miR-320a, miR-154b-5p, miR-376c-3p, miR-300-3p, miR-331-5p, miR-141-3p, miR-125a, miR-3956, miR-370-3p, miR-2355-5p, miR-503-3p, miR-200a-3p, novel\_96, miR-107, miR-450a-2-3p, miR-125a-3p, miR-2285af, miR-205-5p, miR-1260a, miR-490-3p, miR-200a, novel\_39, miR-148b-5p, miR-2478, miR-4286, miR-3529, miR-204-5p, miR-211, miR-2404, novel\_51, miR-211-5p, miR-3960, miR-1434-3p

PTPRN2 ENSOARGO( protein miR-2284u, miR-199b-5p, miR-376b-5p, miR-411-5p, miR-199a-5p, miR-222-5p, miR-487a-3p, miR-7859, miR-485-3p, miR-329-5p, miR-3074-5p, miR-151a-3p, miR-548e-3p, miR-592, miR-199b-5p, miR-485-3p, miR-151-3p, miR-330-3p, miR-2285p, miR-4324, miR-2284a, miR-199b-5p, miR-199a-5p, miR-2284y, miR-2284b, miR-2330-3p, miR-195a-3p, miR-3074-5p, miR-6240, miR-329a-5p, miR-590-3p

CENPU ENSOARGO( centrome: 5p, miR-485-3p, miR-151-3p, miR-330-3p, miR-2285p, miR-4324, miR-2284a, miR-199b-5p, miR-199a-5p, miR-2284y, miR-2284b, miR-2330-3p, miR-195a-3p, miR-3074-5p, miR-6240, miR-329a-5p, miR-590-3p

miR-342-3p, miR-326-3p, miR-449a, miR-24-3p, miR-34c, miR-16a, miR-15a, miR-6529b, miR-203b-5p, miR-7-1-3p, miR-378b, miR-670-3p, miR-34b, miR-2285ab, miR-6516-3p, miR-195a-5p, miR-330-3p, miR-197-5p, miR-2331-5p, miR-125a-5p, miR-377-5p, miR-133b-5p, miR-2355-3p, miR-2285g, miR-432-5p, miR-185-5p, miR-873a-5p, miR-653, miR-1285, miR-30b-3p, miR-219a-1-3p, miR-1260b, miR-378c, miR-500b-5p, miR-3969, miR-135a-1-3p, miR-5100, miR-28-5p, miR-486b-3p, miR-370-3p, miR-199a-5p, miR-324-5p, miR-2284n, miR-34c-5p, miR-769, miR-362-5p, novel\_48, miR-7144-5p, miR-671-5p, miR-1814c, miR-485-5p, miR-199a-5p, miR-1271-3p, miR-490-3p, miR-28b, miR-30c-2-3p, miR-1260a, miR-6516-5p, miR-483-3p, miR-378h, miR-1271-5p, miR-128-3p, miR-1296-5p, miR-2285f, miR-32-3p, miR-219a-2-3p, miR-362-5p, miR-769-5p, miR-2285y, miR-541-5p, miR-7977, miR-664b, miR-7857-3p, miR-378e, miR-199b-5p, novel\_94, miR-1839-3p, miR-424-5p, miR-758-3p, miR-30c-1-3p, miR-362-3p, miR-342, novel\_103, miR-1306-5p, miR-326, novel\_4, miR-151a-3p, miR-409b, miR-2300a-5p, miR-216a-3p, miR-9788-3p, miR-500-5p, miR-2285e, miR-30b-3p, miR-296-5p, miR-378b, miR-484, miR-3120-5p, miR-378c, miR-1271, miR-378c, miR-324-3p, miR-708-5p, miR-424-5p, miR-450b-3p, miR-21-3p, miR-221-5p, miR-378a-3p, miR-32-3p, miR-204-3p, novel\_32, miR-6516, miR-21a-3p, miR-2312, miR-183-5p, miR-216c-5p, miR-130a-5p, miR-216a-5p, miR-125b, miR-34b-5p, miR-221-5p, miR-21-3p, miR-2284m, miR-3600, miR-1b-3p, miR-548e-3p, miR-151-5p, miR-532-3p, miR-383-5p, miR-15a-5p, miR-2904, miR-126-3p, novel\_133, miR-362-3p, miR-2300b-3p, miR-1839-3p, miR-2284w, miR-199b-5p, miR-4324, miR-1247-3p, miR-28c, miR-6535, miR-1306, miR-216a-3p, miR-3591-3p, miR-378f, miR-412-3p, miR-6240, miR-432-3p, miR-432-3p, novel\_51, miR-483-3p, miR-3955-5p, miR-31-5p, miR-149-

miR-181a-2-3p, miR-29b-2-5p, miR-238b-3p, miR-2478, miR-376c-5p, miR-199a-5p, miR-376b-5p, miR-200c, miR-2397-5p, miR-6119-5p, miR-376b-3p, miR-1260a, miR-339a, miR-217, miR-200c-3p, miR-450a-2-3p, miR-107, miR-302a-5p, miR-24-2-5p, miR-582-3p, miR-545-5p, miR-30a-5p, miR-300, let-7a-2-3p, miR-200b-3p, miR-1306-5p, miR-133a-3p, miR-6128, miR-374a-3p, miR-145-3p, miR-410-5p, miR-331-3p, miR-26c, miR-138-5p, miR-374b-3p, miR-487a-3p, miR-141-3p, miR-598-3p, miR-365a-3p, miR-374c-3p, miR-199a-5p, miR-381-3p, let-7g-3p, miR-10b-3p, miR-671-5p, miR-376c-5p, miR-2483-5p, miR-654-3p, miR-539-3p, miR-190a, miR-2285l, miR-544b, miR-103, miR-653, miR-194-5p, miR-374b-3p, miR-219a-1-3p, miR-1260b, miR-138, miR-21-5p, miR-219b-3p, miR-135a-2-3p, miR-2285x, miR-3959-3p, miR-6402, miR-15a, miR-382-5p, miR-16a, novel\_1, miR-656-5p, miR-670-3p, miR-376b-3p, miR-21c, miR-107, miR-195a-5p, miR-29b-1-5p, miR-374a-5p, miR-196a-3p, miR-185-3p, miR-221-5p, miR-30d, miR-485-3p, miR-1b-3p, miR-200b, miR-15a-5p, miR-487a-3p, miR-362-3p, miR-2408, miR-1197-5p, miR-188-3p, miR-2904, miR-145a-3p, miR-539-5p, miR-3074-2-3p, miR-338-3p, miR-29b-2-5p, miR-132-5p, miR-155-5p, miR-208b-5p, miR-487a-5p, miR-221-5p, miR-182-5p, miR-139-5p, miR-544-3p, miR-132-5p, miR-155-5p, miR-877-5p, novel\_25, miR-21a-3p, miR-154b-3p, miR-30f, miR-133b-3p, let-7g-3p, novel\_99, miR-582-5p, miR-424-5p, miR-33a-5p, miR-376b, miR-362-3p, miR-151a-3p, miR-216a-3p, miR-4791, miR-484, miR-544a, miR-3120-5p, miR-16-2-3p, miR-2284aa, miR-452-5p, miR-194b-5p, miR-219a-2-3p, miR-8095, miR-30b-5p, miR-382-3p, miR-2285t, miR-20a-3p, miR-541-5p, miR-499b-5p, miR-3082-5p, miR-376d, miR-199b-5p, novel\_94, miR-219-3p, miR-30f, miR-200a-3p, miR-429-3p, miR-2285ad, novel\_79, miR-1224-5p, miR-9-5p, miR-322-5p, miR-486-5p, miR-2281z, miR-196a-5p, miR-2591-5p, miR-2127, miR-365b-5p, miR-130b-5p, miR-106b-3p, miR-138-5p, miR-130b-5p, miR-7705, miR-365a-5p, novel\_111, miR-1248, miR-3120-5p, miR-544a, miR-138, miR-542-5p, miR-3957-5p, miR-3957, miR-544b, miR-544-3p  
 miR-29a-3p, miR-374c-3p, miR-27a-3p, miR-154b-5p, miR-181b-3p, miR-677, miR-548o-3p, miR-216b-3p, miR-598-3p, miR-3065-3p, miR-1827, miR-1814c, miR-2387, miR-21c, miR-487b-5p, miR-598-3p, miR-224-5p, miR-1197-3p, miR-145a-3p, miR-342-3p, miR-29c-3p, miR-29a, miR-487b-5p, miR-199c, miR-494-5p, miR-29b-3p, miR-410-5p, miR-2285n, miR-2285y, miR-340-5p, miR-7859, miR-199b-3p, miR-2285ad, miR-548e-3p, miR-27a-3p, miR-222-5p, miR-181b-2-3p, miR-2426, miR-29b, miR-21-5p, miR-27b-3p, miR-2366, miR-484, miR-140-3p, novel\_23, miR-374b-3p, miR-29d-3p, miR-181b-1-3p, miR-2310, miR-3065-3p, miR-200a, miR-8485, miR-377-3p, miR-224-5p, miR-342

GAS2 ENSOARGO(growth a)

PARN ENSOARGO(poly(A)-

PLEKHA1 ENSOARGO(pleckstr

miR-7705, miR-212-3p, miR-2447, novel\_1, miR-2284q, miR-208b-5p, miR-101-3p, miR-576-3p, miR-2285j, miR-485-3p, miR-1185-2-3p, miR-204-3p, miR-216b-3p, miR-2284g, miR-26b-5p, miR-21-3p, let-7g-3p, miR-107, miR-450b-3p, novel\_99, miR-7144-5p, miR-301, miR-21a-3p, miR-129b-5p, miR-3591-3p, miR-148b-5p, miR-2284y, miR-8485, miR-101b-3p, miR-1388-3p, let-7f-2-3p, let-7f-2-3p, miR-2284b, miR-543-5p, miR-107, miR-3653-3p, miR-26a-5p, miR-2285af, miR-7859, miR-1185-3p, miR-103, miR-411-5p, miR-148b-5p, miR-103a-3p, novel\_78, miR-548e-3p, miR-148a-5p, miR-2284u, miR-218-1-3p, miR-2300b-3p, miR-3071-5p, miR-125b-2-3p, miR-7641, miR-6516-5p, miR-378h, miR-322-5p, miR-9-5p, miR-134-5p, miR-134, miR-345-3p, miR-330-5p, miR-23b-5p, miR-582-3p, miR-496, miR-2403, miR-2385-3p, miR-148b-5p, novel\_39, miR-199a-5p, miR-205-5p, miR-181c-3p, miR-127-5p, miR-543-5p, miR-223-5p, miR-199a-5p, miR-3154, miR-23b, miR-345-5p, miR-671-5p, miR-7144-5p, miR-23a-5p, miR-6128, miR-3607-3p, miR-16-5p, miR-193a-5p, miR-378c, miR-135a-1-3p, miR-2332, miR-1306-3p, miR-3969, novel\_9, miR-486b-3p, miR-134-5p, miR-204-5p, miR-26b-3p, miR-130a-3p, miR-432-5p, miR-149-5p, miR-542-3p, miR-223-3p, miR-432, miR-3071-5p, miR-197-3p, miR-16-1-3p, miR-30b-3p, miR-16b, miR-188-5p, miR-27b-3p, miR-497-5p, miR-130b-5p, miR-432-3p, miR-432-3p, miR-654-3p, miR-2285r, miR-345-5p, miR-224-5p, miR-2411-3p, novel\_51, miR-3074-5p, miR-378b, novel\_68, miR-2404, miR-323a-5p, miR-181b-3p, miR-677, miR-2285ab, miR-378b, miR-6516-3p, miR-195a-5p, miR-378f, miR-371b-3p, miR-3959-3p, miR-211, miR-2428, miR-301b-3p, miR-199b-5p, novel\_27, miR-326-3p, miR-15a, miR-502-5p, miR-16a, miR-421-5p, miR-548e-3p, miR-15a-5p, miR-222-5p, miR-23c, miR-23b-3p, miR-7859, miR-210-3p, miR-616-3p, miR-199a-3p, miR-2284h-5p, miR-378i, miR-378a-3p, miR-140-3p, miR-5703, miR-493-3p, miR-148a-5p, miR-2285w, miR-130a-5p, miR-181b-1-3p, miR-29b-1-5p, miR-143-3p, miR-486-3p, miR-210-5p, miR-2285p, miR-345-3p, miR-422a, miR-221-5p, miR-496-3p, miR-221-5p, miR-140-5p, miR-378a-3p, miR-182-5p, miR-323-5p, miR-301a-3p, miR-6516, miR-15b-5p, miR-433-3p, miR-345-5p, miR-2312, miR-1827, miR-145a-3p, miR-3074-5p, miR-378c, miR-425-5p, miR-224-5p, miR-6525, miR-6516-3p, miR-130b-5p, miR-424-5p, miR-454-3p, miR-2300a-5p, miR-222-5p, miR-181b-2-3p, miR-27a-3p, miR-1298-3p, miR-425-3p, miR-148b-5p, miR-9788-3p, miR-1298-5p, miR-143-5p, miR-378b, miR-484, miR-125b-2-3p, miR-30b-3p, miR-7857, miR-378c, miR-4429, miR-362-3p, miR-330-5p, miR-2366, miR-362-3p, miR-2284r, miR-329-3p, miR-328-3p, miR-1247-5p, miR-320d, novel\_51, miR-324-3p, miR-362-3p, miR-377-3p, miR-1306-5p, miR-326, miR-320b, miR-342, miR-3065-3p, miR-4532, miR-6395, miR-1895, miR-9851-3p, miR-329a, miR-1291, miR-450b-3p, miR-320a, miR-1306, miR-361-3p, miR-320c, miR-377-3p, miR-132-5p, miR-615-5p, miR-1271, miR-370-3p, miR-3065-3p, miR-4726-5p, miR-320e, miR-132-5p, miR-326-3p, miR-361-3p, miR-342-3p

miR-652b, miR-3958-5p, let-7b, miR-129-5p, miR-454-3p, miR-1468-5p, miR-487b-5p, miR-151-3p, miR-30a-3p, miR-30e-3p, let-7f, let-7i-5p, miR-301a-3p, miR-296-3p, miR-2331-3p, miR-1827, miR-186-5p, miR-625-5p, miR-345-5p, miR-30d-5p, miR-299, miR-486-3p, miR-377-5p, miR-181b-1-3p, let-7k, miR-98-5p, miR-345-3p, miR-219b-5p, miR-2285p, miR-30b, miR-30d-3p, miR-16-1-3p, novel\_73, miR-1434-5p, miR-1961, miR-193b-5p, miR-30c-5p, miR-361-3p, miR-877-3p, miR-2284j, miR-885-5p, miR-490-5p, novel\_82, miR-4443, miR-203-3p, miR-2483-3p, miR-25, miR-3596, miR-211-5p, miR-9-3p, miR-140-5p, miR-2310, miR-8485, miR-103a-2-5p, miR-146b, miR-130b-3p, miR-487b-5p, miR-323b-3p, miR-29b-1-5p, miR-505, miR-421, miR-455-3p, miR-147a, miR-496-5p, miR-181b-2-3p, novel\_78, miR-21b, miR-101c, miR-1839-5p, miR-323b, miR-2284v, novel\_9, miR-125b-5p, miR-2284k, miR-125a, miR-2355-5p, miR-874-3p, miR-1248, miR-345-5p, miR-876-3p, miR-424-3p, miR-30e-5p, miR-450c-5p, let-7g, novel\_39, miR-3064-5p, miR-152-3p, let-7f-5p, miR-127-5p, miR-30f, miR-486-5p, miR-505-5p, miR-412, miR-6517, miR-299a-3p, miR-155-5p, miR-30c, miR-23b-5p, miR-1343-5p, miR-301b-3p, miR-335-5p, novel\_87, miR-4324, miR-181b-3p, miR-669, miR-677, miR-320c, miR-299b-3p, miR-374c-3p, let-7e-5p, miR-146b-5p, miR-410-5p, miR-3065-5p, miR-1306, miR-148a-3p, let-7j, miR-2284l, miR-432-3p, miR-628-5p, miR-380-5p, miR-2411-3p, novel\_51, miR-146a, miR-194-3p, miR-412-5p, miR-31-5p, miR-2284x, miR-16-1-3p, miR-197-3p, miR-432, miR-338-3p, let-7b-5p, miR-4510, miR-539-5p, miR-487a-5p, miR-155-5p, miR-29b-2-5p, miR-324-3p, miR-155-5p, novel\_25, miR-6130, miR-532-5p, miR-660-5p, miR-140-5p, miR-545-3p, novel\_99, miR-27b-5p, miR-146a-5p, miR-2432, miR-29b-1-5p, miR-216c-5p, miR-299-3p, miR-21-3p, miR-30d, miR-30b-3p, miR-166i-5p, miR-320d, miR-2284m, miR-539-5p, miR-541-5p, miR-377-3p, miR-148b-5p, miR-8095, miR-377-3p, miR-3120-5p, novel\_48

DAPL1 ENSOARGO( death as

GTF2F2 ENSOARGO( general

miR-1260b, miR-1197-3p, novel\_42, miR-2284v, miR-193a-5p, miR-144-5p, miR-134-5p, miR-2433, miR-2284k, miR-125b-5p, miR-100-3p, miR-574-5p, miR-2285aa, miR-542-5p, miR-125a, miR-2318, miR-329a, miR-345-5p, miR-30e-5p, miR-450b-5p, miR-2284y, miR-29a-5p, novel\_39, miR-2285b, miR-6536, miR-200a-3p, miR-125a-3p, miR-9-5p, miR-758-5p, miR-134-5p, miR-412, miR-431, miR-30c, miR-1290, miR-330-5p, miR-335-5p, miR-412-5p, miR-142b, miR-677, miR-320c, miR-181b-3p, miR-3120-3p, miR-2319a, miR-3065-5p, miR-432-3p, miR-432-3p, miR-380-5p, miR-483-3p, miR-2411-3p, miR-3955-5p, miR-4508, miR-2284x, miR-2113, miR-197-3p, miR-346, miR-3184-5p, miR-122-5p, miR-451a, miR-4492, miR-130b-5p, miR-30e-3p, miR-30a-3p, miR-665, miR-2284s, miR-499b-3p, miR-10a, miR-151b, miR-504-5p, miR-2331-3p, miR-548o-3p, miR-552-3p, miR-345-5p, miR-1895, miR-625-5p, miR-543-3p, miR-30d-5p, miR-376a-5p, miR-377-5p, miR-181b-1-3p, miR-2285w, miR-2484, miR-30b, novel\_17, miR-210-5p, miR-345-3p, miR-92a-1-5p, miR-2284h-5p, miR-142-3p, miR-2284u, miR-34a-5p, miR-30c-5p, miR-2366, miR-193b-5p, miR-877-3p, miR-361-3p, miR-423-5p, miR-1285-5p, miR-2447, miR-2284j, miR-9-5p, miR-499a-5p, miR-218-5p, miR-301a-5p, miR-499a-3p, miR-2483-3p, miR-203-3p, miR-144-5p, miR-4792, miR-2319b, miR-211-5p, miR-96-5p, miR-504, miR-136-5p, miR-378j, miR-1388-3p, miR-2284b, miR-431-5p, miR-29b-1-5p, miR-323b-3p, miR-147a, miR-455-3p, miR-411b-5p, miR-1343-3p, novel\_78, miR-181b-2-3p, miR-145b, miR-362-3p, miR-2284r, miR-329-3p, miR-541, miR-301b-5p, miR-323b, miR-323-3p, miR-6128, miR-3607-3p, miR-204-5p, miR-34c-5p, miR-2284n, miR-3957, miR-3957-5p, miR-141-3p, miR-10b-3p, novel\_91, miR-7144-5p, miR-671-5p, miR-2448-3p, miR-320a, miR-3154, miR-380-5p, miR-490-3p, miR-2284a, miR-29b-2-5p, miR-30a-3p, miR-17-3p, miR-542-5p, miR-1260a, miR-611a, miR-1185-5p, miR-542-5p, miR-193a-3p, miR-16b, miR-3141, miR-494-3p, miR-424-5p, miR-138, miR-16b, miR-497-5p, miR-1285, miR-4791, miR-2284r, miR-3071-5p, miR-185-5p, miR-147a, miR-3535, miR-149-5p, miR-9788-3p, miR-665, miR-128-1-5p, miR-4726-5p, miR-15a, miR-16a, miR-2447, miR-542-5p, miR-3957-3p, miR-193b-3p, miR-195a-5p, miR-3141, miR-18a-3p, novel\_69, miR-670-3p, miR-3596, miR-6535, miR-669, miR-452-3p, miR-4792, miR-320b, novel\_127, miR-542-5p, novel\_17, miR-185-3p, miR-324-3p, miR-125b-2-3p, miR-664b-3p, miR-143-3p, novel\_39, miR-486-3p, miR-378d, miR-15a-5p, miR-322-5p, miR-18a-3p, miR-138-5p, miR-486b-3p, miR-28-5p, miR-4492, miR-708-5p, miR-424-5p, miR-16-5p, miR-3154, miR-193b-3p, miR-154b-5p, miR-15b-5p, novel\_32, miR-204-3p, miR-296-3p

PSMB8

ENSOARGO( proteasome)

LUZP1

ENSOARGO( leucine)

|       |                   |                                                                                                                                                                                                                                                                                                                                                                                                                                                                                                                                                                                                                                                                                                                                                                                                                                                                                                                                                                                                                                                                                                                                                                                                                                                                                                                                                                                                                                                                                            |
|-------|-------------------|--------------------------------------------------------------------------------------------------------------------------------------------------------------------------------------------------------------------------------------------------------------------------------------------------------------------------------------------------------------------------------------------------------------------------------------------------------------------------------------------------------------------------------------------------------------------------------------------------------------------------------------------------------------------------------------------------------------------------------------------------------------------------------------------------------------------------------------------------------------------------------------------------------------------------------------------------------------------------------------------------------------------------------------------------------------------------------------------------------------------------------------------------------------------------------------------------------------------------------------------------------------------------------------------------------------------------------------------------------------------------------------------------------------------------------------------------------------------------------------------|
| LMCD1 | ENSOARGO(LIM and  | <p>miR-328-3p, miR-1224-5p, miR-18a-3p, miR-6517, miR-2904, miR-345-3p, miR-1290, miR-2432, miR-199a-5p, miR-3064-5p, miR-345-3p, miR-181a-2-3p, miR-3529-3p, miR-221-5p, novel_127, miR-543-5p, miR-450a-2-3p, miR-345-3p, miR-125b, miR-196a-3p, miR-219-3p, miR-204-3p, miR-223-5p, miR-199a-5p, miR-193b-3p, miR-139-5p, miR-532-5p, miR-182-5p, miR-615-5p, miR-125a, miR-504-5p, miR-221-5p, miR-874-3p, miR-3068-3p, miR-23a-5p, miR-1827, miR-485-5p, miR-1814c, miR-27b-5p, miR-21a-3p, miR-3184-5p, miR-193a-5p, miR-138-5p, miR-125b-5p, miR-219b-3p, miR-135a-5p, miR-665, miR-1185-3p, novel_78, novel_4, miR-2300a-5p, miR-138, miR-197-3p, miR-3071-5p, miR-2113, miR-2310, miR-432-3p, let-7c-3p, miR-382-3p, miR-1839-3p, miR-125a-5p, miR-199b-5p, miR-193a-3p, miR-3085-3p, miR-3955-3p, miR-182-5p, miR-2411-3p, miR-203-3p, miR-1185-2-3p, miR-2404, miR-670-3p, miR-2483-3p, miR-499b-5p, miR-7689-3p, miR-139-5p, miR-3064-5p, miR-335-3p, miR-135b-5p, miR-6395, miR-1983, miR-1291, miR-412-3p, miR-504, miR-18a-3p, miR-199b-5p, miR-423-5p, novel_27, miR-219a-2-3p, miR-199b-5p, miR-371b-3p, miR-193b-3p, miR-1839-3p, miR-6527, miR-2447, miR-147-5p, miR-499a-5p, miR-371a-5p</p> <p>miR-210-5p, miR-1973, miR-128-1-5p, miR-4726-5p, miR-486b-3p, miR-2330-5p, miR-541-3p, miR-380-5p, miR-665-5p, miR-1197-3p, miR-361-3p, miR-380-5p, miR-486-3p, miR-541, miR-2448-3p, miR-361-3p, miR-2904, miR-22-3p, novel_69, miR-505-5p, miR-27a-5p, miR-22-3p</p> |
| BGN   | ENSOARGO(biglycan |                                                                                                                                                                                                                                                                                                                                                                                                                                                                                                                                                                                                                                                                                                                                                                                                                                                                                                                                                                                                                                                                                                                                                                                                                                                                                                                                                                                                                                                                                            |

miR-296-3p, miR-105-5p, miR-32, miR-432-3p, miR-2285r, let-7a-2-3p, miR-380-5p, let-7f-2-3p, let-7f-2-3p, miR-2113, miR-708-3p, miR-450c-3p, miR-412-5p, miR-149-5p, miR-31-5p, miR-340-3p, miR-576-3p, miR-4324, novel\_87, miR-199b-5p, miR-376b-5p, miR-3970, miR-374c-3p, miR-411b-3p, novel\_68, miR-26b-5p, miR-127-5p, miR-28-3p, miR-200a-3p, miR-2285b, miR-192-3p, miR-450c-5p, miR-200a, miR-29a-5p, miR-3064-5p, miR-30c, miR-1290, miR-758-5p, miR-129-1-3p, miR-450a-1-3p, miR-2284z, miR-429-3p, miR-18b-5p, miR-1224-5p, miR-412, miR-125b-5p, miR-6740-5p, miR-28a-3p, miR-1248, miR-30e-5p, miR-376c-5p, miR-200a-5p, miR-25-3p, miR-331-5p, miR-503-3p, miR-3068-3p, miR-125a, miR-2355-5p, miR-487b-5p, miR-214-3p, miR-103a-2-5p, miR-199b-5p, miR-182-5p, miR-505, miR-2310, miR-1b-5p, miR-8485, miR-23a-3p, miR-1388-5p, miR-541, miR-758-3p, miR-501-3p, miR-376b-3p, miR-2459, miR-1185-3p, miR-455-3p, miR-148b-5p, miR-145b, miR-3964, miR-1285-5p, miR-363-3p, miR-2447, miR-2284j, miR-6527, miR-3963, miR-376a-3p, miR-140-5p, miR-499a-3p, miR-500-3p, miR-1185-2-3p, miR-2319b, miR-139-5p, miR-211-5p, miR-202-5p, miR-2484, miR-210-5p, miR-26a-5p, miR-30b, miR-92a-1-5p, miR-329a-5p, miR-369-3p, miR-195a-3p, miR-142-3p, miR-148a-5p, miR-30c-5p, miR-1434-5p, miR-23c, novel\_74, miR-130b-5p, miR-500, miR-15b-3p, let-7b-3p, miR-664a-5p, miR-224-5p, miR-346, miR-181c-5p, miR-129-2-3p, miR-214, miR-186-5p, miR-1827, miR-543-3p, miR-625-5p, miR-450a-1-3p, miR-30d-5p, miR-500a-3p, miR-499b-3p, miR-151b, miR-548o-3p, miR-32-5p, miR-2331-3p, miR-296-3p, miR-466f-3p, miR-125a-5p, miR-452-5p, miR-224-5p, miR-296-3p, miR-130b-5p, miR-2284ab, miR-2889, miR-1285, miR-181a-5p, miR-1434-3p, miR-3071-5p, miR-145a-5p, miR-185-5p, miR-544b, novel\_1, miR-22-5p, miR-382-5p, miR-3959-3p, miR-323c, miR-24-3p, miR-211, novel\_27, novel\_120, novel\_101, miR-



miR-409b, miR-330-3p, miR-376b-3p, miR-2285e, miR-9788-3p, miR-455-3p, miR-301b-5p, miR-143-5p, miR-101c, miR-21b, miR-106a-5p, miR-23a-3p, miR-4532, miR-326, miR-106b-5p, miR-139-5p, miR-499a-3p, miR-378g, miR-376d, miR-361-3p, miR-381-3p, miR-147-3p, miR-877-3p, novel\_94, miR-376a-3p, miR-212-3p, miR-885-5p, miR-219a-2-3p, miR-2440, miR-301a-5p, miR-499a-5p, miR-374a-3p, miR-106a, miR-30d-3p, miR-23c, miR-210-3p, miR-23b-3p, miR-328-3p, miR-2300b-3p, miR-98-3p, miR-34a-5p, let-7a-3p, miR-361-5p, miR-218-1-3p, miR-20a, miR-210-5p, miR-196a-3p, miR-185-3p, miR-345-3p, miR-216a-5p, miR-760-3p, miR-106a, miR-34b-5p, miR-1277-5p, miR-221-5p, miR-496-3p, miR-221-5p, miR-370-5p, miR-139-5p, miR-193b-3p, miR-582-5p, miR-499b-3p, miR-2285c, miR-450a-1-3p, miR-411, miR-500a-3p, miR-27b-5p, miR-18a-5p, miR-345-5p, let-7g-3p, miR-582-5p, miR-186-5p, miR-3184-3p, miR-539-5p, miR-98-3p, miR-346, let-7b-3p, miR-2285j, miR-30a-3p, miR-219b-3p, miR-324-3p, miR-664a, miR-450b-3p, miR-500, miR-4492, miR-134-3p, miR-2285g, miR-20b, novel\_116, miR-1285, miR-450c-3p, miR-197-3p, miR-138, miR-4508, miR-6240, miR-345-5p, let-7a-2-3p, miR-503-3p, miR-106a-5p, miR-17-5p, miR-2411-3p, miR-330-3p, miR-483-3p, miR-193a-3p, miR-106b-3p, miR-34b, miR-18b, miR-376b-3p, miR-450b-3p, miR-6516-3p, miR-6395, miR-1193, miR-193b-3p, miR-2428, miR-449a, miR-326-3p, miR-20a-5p, miR-34c, miR-379-3p, miR-18b-5p, miR-1224-5p, miR-483-3p, miR-450a-1-3p, miR-3578, miR-345-3p, miR-330-5p, miR-411-3p, let-7a-2-3p, miR-496, miR-181a-2-3p, miR-2285b, miR-29a-5p, miR-219-3p, miR-376b-3p, miR-503-3p, miR-574-5p, miR-34c-5p, miR-324-5p, miR-23b, miR-18a, miR-17-5p, miR-93-5p, let-7g-3p, miR-345-5p, miR-20b-5p, miR-374a-3p, miR-93, miR-135a-1-3p, miR-370-5p, miR-138-5p, miR-374b-3p, miR-125b-2-3p, miR-22-3p, miR-450c-3p, miR-541, miR-2284r, miR-2426, miR-29b, novel\_4, miR-149-5p, miR-216a-3p, miR-194-3p, miR-3141, miR-30c-1-3p, miR-216a-3p, miR-18a-3p, miR-378j, miR-3141, miR-2387, miR-1291, miR-450b-3p, miR-139-5p, miR-34b, miR-29a-3p, miR-34c, miR-2440, miR-29a, miR-29c-3p, miR-541-3p, miR-449a, miR-24-3p, miR-188-3p, miR-29d-3p, novel\_133, miR-378d, miR-34a-5p, miR-128-3p, miR-885-3p, miR-18a-3p, miR-450a-1-3p, miR-532-3p, miR-92a-1-5p, miR-185-3p, miR-30c-2-3p, miR-2285p, novel\_127, miR-34b-5p, miR-4286, miR-143-3p, miR-3065-3p, miR-29a-5p, miR-450a-1-3p, miR-488-3p, miR-1827, miR-885-3p, miR-296-3p, miR-2355-5p, miR-3065-3p, miR-874-3p, miR-30c-1-3p, miR-2331-3p, miR-22-3p, miR-139-5p, miR-34c-5p, miR-331-3p, miR-29b-3p, miR-4492, miR-450b-3p, miR-1306-5p

USP24 ENSOARGO(ubiquitin)

UBALD2 ENSOARGO(UBA-like)

miR-625-5p, miR-154b-3p, miR-30f, miR-154a-3p, miR-2285aa, miR-3065-3p, miR-1277-3p, miR-487a-3p, miR-544-3p, miR-6516, miR-582-5p, miR-29b-2-5p, miR-19b-1-5p, miR-2285j, miR-29b-3p, miR-6128, miR-145-3p, miR-142a-5p, miR-29d-3p, miR-2366, miR-3578, miR-376a-5p, miR-30c-5p, miR-345-3p, miR-105-2, miR-16-1-3p, miR-376a-5p, miR-485-3p, miR-3600, miR-2285ad, miR-299a-3p, miR-2284h-5p, miR-340-5p, miR-148b-3p, miR-6516-5p, miR-487a-3p, miR-345-3p, miR-125a-3p, miR-21-3p, miR-299-3p, miR-152-3p, miR-466i-5p, miR-127-5p, miR-181a-2-3p, miR-29b-2-5p, miR-487a, miR-3529-3p, miR-2285w, miR-192-3p, miR-376b-5p, miR-1957a, miR-146a-5p, miR-3065-3p, miR-376c-5p, miR-148b-5p, miR-29b-1-5p, miR-378j, miR-148a-3p, miR-376a-2-5p, miR-146b-5p, miR-7977, miR-499b-5p, miR-203-3p, miR-652-3p, miR-6535, miR-29a-3p, miR-299b-3p, miR-378g, miR-2285y, miR-576-3p, miR-2440, miR-2285n, miR-154-3p, miR-22-5p, miR-29a, miR-29c-3p, novel\_111, miR-125b-2-3p, miR-873a-5p, miR-1839-5p, miR-544a, miR-450b-5p, miR-16-1-3p, miR-29b, miR-5010-3p, miR-105-1, miR-126a-5p, miR-544b, miR-134-3p, miR-142-5p, miR-2411-3p, miR-29b-1-5p, miR-105-5p, miR-146a, miR-466f-3p, miR-146b, miR-124-5p, miR-33a-5p, miR-744-3p, miR-8485, miR-539-3p, miR-370-3p, miR-615-5p, miR-3154, miR-488-3p, miR-1814c, miR-10b-3p, let-7g-3p, miR-345-5p, miR-329a, miR-16-5p, miR-331-3p, miR-6740-5p, miR-2433, miR-370-5p, miR-486b-3p, miR-138-5p, miR-6517, miR-322-5p, miR-1271-5p, miR-483-3p, miR-1343-5p, miR-2427, miR-345-3p, let-7a-2-3p, miR-3064-5p, miR-4286, miR-3065-3p, novel\_39, miR-181c-3p, miR-125a-3p, miR-152-3p, novel\_96, novel\_127, miR-450a-2-3p, miR-127-5p, miR-363, miR-216b-3p, miR-3074-5p, novel\_69, miR-1306, miR-18a-3p, miR-3141, miR-148a-3p, miR-195a-5p, miR-1291, miR-1193, miR-2285m, miR-16a, miR-15a, miR-656-5p, miR-147-5p, miR-377-5p, miR-185-5p, miR-134-3p, miR-22-3p, miR-19b-2-5p, miR-542-3p, miR-7b-5p, miR-497-5p, miR-744-5p, miR-138, miR-16b, miR-6240, let-7a-2-3p, miR-345-5p, miR-432-3p, miR-3141, miR-330-3p, novel\_51, miR-2411-3p, miR-7-5p, miR-1343-5p, miR-466f-3p, miR-483-3p, miR-370-5p, novel\_107, miR-3065-3p, miR-140-5p, miR-204-3p, miR-22-3p, miR-15b-5p, miR-6130, miR-433-3p, miR-1827, novel\_99, let-7g-3p, miR-345-5p, miR-1271, miR-3074-2-3p, miR-214, miR-539-5p, miR-3074-5p, miR-4510, miR-3184-5p, miR-6525, miR-346, miR-132-5p, miR-19b-1-5p, miR-665, miR-874-5p, miR-424-5p, miR-129-5p, miR-4492, miR-18a-3p, novel\_83, miR-532-3p, miR-148b-3p, miR-15a-5p, miR-1197-5p, miR-188-3p, miR-2300b-3p, miR-362-3p, miR-493-3p, novel\_73, miR-33b-3p, miR-142-3p, miR-486-3p, miR-143-3p, miR-376a-5p, miR-377-5p, miR-324-3p, miR-185-3p, miR-345-3p, miR-21-3p, miR-466i-5p, miR-3064-5p, miR-378g, miR-7857-3p, miR-140-5p, miR-361-3p, miR-96-5p, miR-2447, miR-541-3p, miR-212-3p, miR-423-5p, miR-361-3p, miR-1973, miR-2440, miR-1343-3p, miR-330-3p, miR-455-3p, miR-153, miR-147a, miR-329-3p, miR-296-5p, miR-541, miR-143-5p, miR-3120-5p, miR-362-3p, miR-1388-5p, let-7c-3p, miR-382-3p, miR-2330-5p, miR-124-5p, miR-8485, miR-2310, miR-262-3p, miR-16b, miR-

SPIN1 ENSOARGO( spindlin

CADM3 ENSOARGO( cell adh

miR-6240, miR-668-3p, miR-432-3p, miR-22841, miR-432-3p, let-7a-2-3p, miR-7-5p, miR-146a, miR-105-5p, miR-2411-3p, miR-106b-3p, miR-31-5p, miR-103a-3p, miR-3431, novel\_116, miR-194-3p, miR-149-5p, miR-19b-2-5p, miR-432, miR-7b-5p, miR-450c-3p, miR-3432b, miR-4508, miR-27b-3p, miR-335-5p, miR-29c-3p, miR-142b, miR-29a, miR-6123, miR-329-5p, miR-411b-3p, miR-299b-3p, miR-669, miR-320c, miR-677, miR-6535, miR-144-3p, miR-181b-3p, miR-412-3p, miR-146b-5p, miR-378f, miR-2284y, miR-192-3p, miR-2285b, miR-125a-3p, miR-127-5p, novel\_127, miR-200a-3p, miR-299a-3p, miR-429-3p, miR-1224-5p, miR-412, miR-18b-5p, miR-505-5p, miR-758-5p, miR-2284z, miR-450a-1-3p, miR-134-5p, miR-486-5p, miR-885-3p, miR-2284v, miR-1260b, novel\_63, miR-331-5p, miR-134-5p, miR-592, miR-3068-3p, miR-874-3p, miR-2355-5p, miR-2285aa, miR-331-5p, miR-767, miR-345-5p, miR-329b, miR-1388-3p, miR-574-3p, miR-2284b, miR-378d, miR-29b-1-5p, miR-505, miR-323b-3p, miR-146b, miR-214-3p, miR-1343-3p, novel\_78, miR-181b-2-3p, miR-145b, miR-147a, miR-455-3p, miR-323b, miR-1388-5p, miR-101c, miR-2447, miR-3956-3p, miR-6527, miR-361-3p, miR-423-5p, miR-1285-5p, novel\_82, miR-2284g, miR-2285u, miR-211-5p, miR-3596, miR-4443, miR-381-3p, miR-3963, miR-136-5p, miR-504, miR-1983, miR-329a-5p, miR-345-3p, miR-2285i, miR-376a-5p, miR-181b-1-3p, miR-2424, miR-500a-5p, miR-345-3p, miR-422a, miR-92a-1-5p, miR-18a-3p, miR-328-3p, miR-378i, miR-378a-3p, miR-493-3p, miR-133a-3p, miR-361-5p, miR-214, miR-665-5p, miR-3184-5p, miR-181c-5p, miR-2285j, miR-151-3p, miR-451a, miR-4492, miR-504-5p, miR-30c-1-3p, miR-552-3p, miR-296-3p, miR-10a, miR-450a-1-3p, miR-129b-3p, miR-345-5p, miR-543-3p, miR-885-3p, miR-625-5p, miR-363-5p, miR-654-3p, miR-345-5p, miR-197-5p, miR-330-3p, miR-455-5p, miR-2285l, miR-133b-5p, miR-2284d, miR-132-5p, miR-544b, miR-103, miR-1285, miR-2355-5p, miR-3957-5p, miR-3957, novel\_32, miR-193b-3p, miR-3065-5p, miR-129b-3p, miR-2300b-3p, miR-2387, miR-1827, miR-378d, miR-625-5p, miR-941, miR-193b-3p, miR-361-3p, novel\_17, miR-193a-3p, miR-25-5p

CXCL16

ENSOARGO( chemokin

LIPE

ENSOARGO( lipase,

miR-4324, novel\_120, miR-758-5p, miR-24-3p, miR-326-3p, miR-199b-5p, miR-2428, miR-2285ab, miR-378b, miR-107, miR-2319a, miR-135b-5p, miR-3120-3p, miR-299b-3p, miR-670-3p, miR-6535, miR-677, miR-181b-3p, miR-7-5p, miR-503-5p, miR-190a, miR-483-3p, miR-452-5p, miR-125a-5p, miR-466f-3p, miR-628-5p, miR-2285r, miR-708-3p, miR-7b-5p, miR-2113, miR-450c-3p, miR-197-3p, miR-3071-5p, miR-16-1-3p, miR-27b-3p, miR-31-5p, miR-103a-3p, miR-503-5p, miR-134-3p, miR-185-5p, miR-194-3p, miR-103, miR-551b-3p, miR-125b-5p, miR-135a-5p, miR-10b-3p, miR-485-5p, miR-671-5p, miR-874-3p, miR-3068-3p, miR-2355-5p, miR-125a, miR-300-3p, miR-769, miR-199a-5p, miR-200c, miR-2898, miR-200c-3p, miR-107, novel\_96, miR-3529-3p, miR-29b-2-5p, miR-450b-5p, miR-199a-5p, novel\_39, miR-192-3p, miR-330-5p, miR-200b-3p, miR-299a-3p, miR-429-3p, miR-7641, miR-2411-5p, miR-483-3p, miR-545-5p, miR-450a-1-3p, miR-382-3p, miR-769-5p, miR-3968, miR-2285t, miR-2447, miR-541-3p, miR-2285f, miR-190b-5p, miR-423-5p, miR-361-3p, miR-199b-5p, miR-136-5p, miR-139-5p, miR-7689-3p, miR-126b-5p, miR-378g, miR-2483-3p, miR-203-3p, miR-27a-3p, miR-326, miR-491-5p, miR-199b-5p, miR-382-3p, miR-744-3p, miR-8485, miR-2284r, miR-484, miR-541, miR-101a-5p, miR-409b, miR-1343-3p, miR-181b-2-3p, miR-27a-3p, miR-147a, miR-455-3p, miR-216a-3p, miR-29b-2-5p, miR-450b-3p, miR-4492, miR-190a-5p, miR-4510, miR-3184-3p, miR-665-5p, miR-6525, miR-769-5p, miR-346, miR-3184-5p, miR-6134, miR-450a-1-3p, miR-129b-3p, miR-2312, miR-186-5p, miR-582-5p, miR-2331-3p, miR-552-3p, miR-296-3p, miR-27a-5p, miR-6130, miR-139-5p, miR-204-3p, novel\_17, miR-92a-1-5p, miR-125b, miR-299-3p, miR-216c-5p, miR-105-3p, miR-503-5p, miR-376a-5p, miR-181b-1-3p, miR-125b-2-3p, miR-2411, miR-2904, miR-188-3p, miR-1197-5p, miR-133a-3p, miR-16-1-3p, miR-380-5p, miR-1b-3p, miR-200b

miR-2285r, miR-503-3p, miR-296-3p, miR-582, miR-377-3p, miR-3141, miR-2285v, miR-365b-5p, miR-2411-3p, miR-378a-5p, miR-483-3p, miR-31-5p, miR-103a-3p, miR-339-5p, miR-3535, miR-134-3p, novel\_116, miR-432, miR-450c-3p, miR-431-3p, novel\_23, miR-16b, miR-497-5p, miR-369-5p, miR-2284x, miR-199b-5p, miR-2284w, miR-4324, miR-142b, miR-2284o, miR-425-5p, novel\_68, miR-6535, miR-320c, miR-3141, miR-3065-5p, miR-3591-3p, miR-3064-5p, miR-2284f, miR-450b-5p, miR-148b-5p, miR-200a, miR-29a-5p, miR-3956-5p, miR-205-5p, miR-664-3p, miR-30f, miR-127-5p, novel\_96, miR-200a-3p, miR-2285ad, novel\_79, miR-431, miR-9-5p, miR-322-5p, miR-758-5p, miR-450a-1-3p, miR-2427, miR-16-5p, miR-193a-5p, miR-6740-5p, miR-125b-5p, miR-3432a, miR-574-5p, miR-874-3p, miR-2285aa, miR-2355-5p, miR-125a, miR-3956, miR-300-3p, miR-424-3p, miR-301, miR-93-5p, miR-23b, miR-329a, miR-20b-5p, miR-23a-3p, miR-8485, miR-2310, miR-431-5p, miR-323b-3p, miR-505, miR-29b-1-5p, miR-16b, miR-106b-5p, miR-182-5p, miR-491-5p, miR-199b-5p, miR-548w, novel\_78, miR-539-5p, miR-147a, miR-455-3p, miR-2459, miR-329-3p, miR-2284r, miR-323b, miR-758-3p, miR-362-3p, miR-2447, miR-6527, miR-9-5p, miR-361-3p, miR-628-3p, miR-3968, miR-25, miR-3596, miR-378g, miR-2483-3p, miR-409-5p, miR-136-5p, miR-335-3p, miR-544-5p, miR-2285p, miR-500a-5p, miR-345-3p, miR-92a-1-5p, miR-106a, miR-212-5p, miR-23b-3p, miR-23c, miR-193b-5p, miR-1434-5p, miR-184-3p, miR-33b-3p, miR-665-5p, miR-769-5p, miR-6525, miR-2285j, miR-30e-3p, miR-151-3p, miR-30a-3p, miR-129-5p, miR-30c-1-3p, miR-377-3p, miR-15b-5p, miR-450a-1-3p, miR-2285c, miR-129b-3p, miR-411, miR-339b, miR-543-3p, miR-654-3p, miR-296-3p, let-7d-3p, miR-106a-5p, miR-17-5p, miR-124-5p, miR-125a-5p, miR-452-5p, miR-133b-5p, miR-665, miR-2285g, miR-432-5p, miR-103, miR-20b, miR-2355-3p, miR-873a-5p, miR-653, miR-1434-3p, miR-3958-5p, miR-129-2-3p, miR-4510, miR-224-5p, miR-665, miR-331-3p, miR-125b-5p, miR-34c-3p, miR-2285j, miR-592, miR-6516-3p, novel\_74, miR-182-5p, miR-125a, miR-552-3p, miR-154a-3p, miR-221-5p, miR-376c-3p, miR-877-5p, miR-6130, miR-365a-3p, miR-376e-3p, miR-3154, miR-200a-5p, miR-3074-1-3p, miR-154b-3p, miR-29a-5p, miR-376c-3p, miR-125b, novel\_17, miR-664-3p, miR-6119-5p, miR-208b-3p, miR-618, miR-221-5p, miR-1224-5p, miR-214-5p, novel\_121, miR-129-1-3p, miR-483-3p, miR-302a-5p, miR-140-3p, miR-128-3p, miR-133a-3p, miR-218-1-3p, miR-33b-3p, miR-19b-3p, novel\_101, miR-194b-5p, miR-6527, miR-212-3p, miR-541-3p, miR-107-5p, miR-147-5p, miR-154-3p, miR-490-5p, novel\_1, miR-2285u, miR-664b, novel\_69, miR-216a-3p, miR-3970, miR-19a-3p, miR-410-5p, miR-491-3p, miR-2284l, miR-194a, miR-182-5p, novel\_51, miR-224-5p, miR-103a-2-5p, miR-125a-5p, miR-483-3p, miR-5010-3p, miR-409b, miR-2355-3p, miR-2459, miR-3431, miR-185-5p, miR-1298-3p, miR-432-5p, miR-3071-5p, miR-194-5p, miR-30b-3p, miR-143-5p, miR-541, miR-432, miR-101c, miR-30b-3p

APCS ENSOARGO( amyloid 3p, miR-3074-1-3p, miR-876-3p, miR-6516, miR-196b-5p, miR-6516-5p, miR-196a-5p

KDM1A ENSOARGO( lysine ( miR-3074-1-3p, miR-876-3p, miR-6516, miR-196b-5p, miR-6516-5p, miR-196a-5p

SECISBP2 ENSOARGO( SECIS bi: miR-3074-1-3p, miR-876-3p, miR-6516, miR-196b-5p, miR-6516-5p, miR-196a-5p

miR-7859, miR-758-5p, novel\_121, miR-222, miR-548e-3p, miR-3600, miR-142-3p, miR-5703, miR-380-5p, miR-2424, miR-216c-5p, miR-195a-3p, miR-181b-5p, miR-21-3p, miR-219-3p, miR-2285p, novel\_17, miR-125a-3p, miR-30f, miR-548o-3p, miR-21-3p, miR-190a-3p, miR-186-5p, miR-21a-3p, let-7f-1-3p, miR-2448-3p, miR-3154, miR-411, miR-6525, miR-181c-5p, let-7b-3p, miR-222-3p, miR-219b-3p, miR-1298-3p, miR-221-3p, miR-2459, miR-340-3p, novel\_78, miR-27a-3p, miR-450b-5p, miR-101c, miR-455-5p, miR-27b-3p, miR-873a-5p, miR-181a-5p, novel\_23, miR-3071-5p, miR-380-5p, miR-574-3p, miR-101b-3p, miR-382-3p, miR-382, miR-668-3p, miR-124-5p, miR-452-5p, miR-455-5p, novel\_69, miR-411b-3p, miR-27a-3p, miR-544-5p, miR-221, miR-3591-3p, miR-381-3p, miR-3959-3p, miR-219a-2-3p, miR-2284w, novel\_60, miR-3956-3p, miR-181d-5p, miR-495-3p, miR-628-3p, novel\_1, miR-147-5p, miR-101-3p, miR-382-5p, let-7i-5p, novel\_25, miR-204-3p, miR-769, miR-132-5p, miR-10a, miR-2284s, miR-3956, miR-615-5p, miR-548o-3p, miR-30c-1-3p, miR-504-5p, miR-339b, miR-362-5p, let-7b-5p, miR-10b-5p, miR-500b-5p, miR-769-5p, miR-3074-2-3p, miR-1271, miR-433-5p, let-7b, miR-134-5p, miR-204-5p, miR-17-3p, miR-6740-5p, let-7f, miR-134-5p, miR-1271-5p, novel\_79, miR-548e-3p, miR-10a-5p, let-7d, miR-1343-5p, miR-124-3p, miR-1961, miR-134, miR-1290, miR-196a-5p, novel\_133, let-7g, miR-376a-5p, miR-345-3p, let-7k, let-7f-5p, miR-98-5p, miR-2898, miR-17-3p, let-7c-5p, miR-339a, miR-181c-3p, miR-92a-1-5p, miR-30c-2-3p, miR-500a-5p, miR-664-3p, miR-27a-3p, let-7d-5p, miR-3596, miR-211-5p, miR-10a-5p, miR-664b, let-7e-5p, miR-504, miR-96-5p, miR-378j, miR-362-5p, miR-211, miR-17-3p, miR-1839-3p, miR-2447, miR-147-5p, miR-499a-5p, let-7i, miR-769-5p, miR-576-3p, miR-2459, miR-500-5p, miR-9788-3p, miR-185-5p, let-7g-5p, miR-27a-3p, miR-339-5p, miR-409b, miR-27b-3p, miR-2426, novel\_23, miR-7b-5p, miR-10b, miR-484, miR-2284r, miR-4532, miR-432-3p, miR-432-3p, miR-30c-1-3p, miR-668-3p, miR-382-3p, miR-1839-3p, miR-1388-3p, let-7a-5p, miR-124a, let-7e, miR-1343-5p, miR-196b-5p, miR-1185-5p, miR-7-5p

OTOP1

ENSOARGO( otopetri:

EDEM1

ENSOARGO( ER degra

miR-6516-5p, miR-378h, miR-2411-5p, miR-322-5p, miR-24-2-5p, novel\_121, miR-582-3p, miR-450a-1-3p, miR-6517, miR-222, miR-299a-3p, miR-10a-5p, miR-155-5p, miR-345-3p, miR-3591-5p, miR-330-5p, miR-501-3p, miR-24-2-5p, miR-28b, miR-450b-5p, miR-1271-3p, miR-2285b, miR-181a-2-3p, miR-3064-5p, miR-127-5p, miR-6536, miR-450a-2-3p, miR-28-3p, miR-17-3p, miR-2898, miR-200a-3p, miR-219-3p, miR-376b-3p, miR-365a-3p, miR-3959-5p, miR-331-5p, miR-34c-5p, miR-3068-3p, miR-874-3p, miR-141-3p, miR-1271, miR-10b-3p, miR-671-5p, miR-1814c, miR-1248, miR-488-3p, miR-200a-5p, miR-378c, miR-1306-5p, miR-28a-3p, miR-16-5p, miR-193a-5p, miR-28-5p, miR-494-5p, miR-34c-3p, miR-3969, miR-6740-5p, miR-3431, miR-412-5p, miR-194-3p, miR-31-5p, miR-26b-3p, miR-380-3p, miR-16b, miR-497-5p, miR-1285, miR-708-3p, miR-450c-3p, miR-654-3p, miR-6240, miR-378a-5p, miR-124-5p, miR-2411-3p, miR-330-3p, miR-105-5p, miR-34b, miR-299b-3p, miR-677, miR-378b, miR-26b-5p, miR-10a-5p, miR-3120-3p, miR-195a-5p, miR-378f, miR-2319a, miR-3591-3p, miR-376b-3p, miR-1306, miR-371b-3p, miR-326-3p, miR-449a, miR-335-5p, miR-17-3p, miR-495-3p, miR-2285x, miR-199c, miR-203b-5p, miR-28c, miR-15a, miR-34c, miR-16a, miR-15a-5p, miR-487a-3p, miR-7859, miR-95-3p, miR-2284h-5p, miR-548e-3p, miR-485-3p, miR-1b-3p, miR-3600, miR-34a-5p, miR-378d, miR-361-5p, miR-664-5p, miR-378i, miR-1434-5p, miR-1197-5p, miR-378a-3p, miR-130a-5p, miR-421-5p, miR-376a-5p, miR-143-3p, miR-380-3p, miR-2411, miR-2285w, miR-195a-3p, miR-369-3p, miR-466i-5p, miR-21-3p, miR-299-3p, miR-221-5p, miR-34b-5p, miR-26a-5p, miR-210-5p, miR-2285p, miR-374a-5p, miR-422a, miR-345-3p, miR-324-3p, miR-6516, miR-544-3p, miR-10a, miR-15b-5p, miR-877-5p, miR-221-5p, miR-378a-3p, miR-552-3p, miR-21-3p, novel\_99, miR-450a-1-3p, miR-21a-3p, miR-487b-5p, miR-129b-3p, miR-10b-5p, miR-6525, miR-

miR-125b, miR-196a-3p, miR-542-5p, miR-30d, miR-30b-3p, miR-34b-5p, miR-21-3p, miR-2284m, miR-466i-5p, miR-760-3p, miR-532-3p, miR-487a-3p, miR-148b-3p, miR-15a-5p, miR-124-3p, miR-188-3p, miR-1197-5p, miR-5703, novel\_133, miR-215-5p, miR-2300b-3p, miR-19b-3p, miR-425-5p, miR-378c, miR-4510, let-7b-5p, miR-338-3p, miR-6134, miR-19b-1-5p, miR-320e, miR-338-5p, miR-708-5p, miR-424-5p, miR-664a, miR-3065-3p, miR-182-5p, miR-532-5p, miR-378a-3p, miR-545-3p, miR-22-3p, miR-204-3p, miR-877-5p, miR-192-5p, miR-6130, miR-193b-3p, miR-133b-3p, miR-30f, let-7a-5p, miR-424-5p, miR-4532, miR-193a, miR-30c-1-3p, miR-326, miR-1306-5p, let-7e, miR-542-5p, miR-3085-3p, miR-25-5p, miR-3955-3p, novel\_4, miR-9788-3p, miR-30b-3p, miR-484, miR-6529a, miR-378b, miR-378c, miR-2426, miR-2285f, novel\_60, miR-541-3p, miR-371a-5p, miR-107-5p, miR-4726-5p, miR-7977, miR-3064-5p, miR-20a-3p, miR-452-3p, let-7d-5p, miR-454-5p, miR-378e, miR-489, miR-3082-5p, miR-361-3p, miR-877-3p, miR-4286, miR-3065-3p, miR-2284a, miR-30c-2-3p, miR-339a, let-7c-5p, miR-1260a, miR-2898, miR-7641, miR-378h, miR-218-2-3p, miR-29d-3p, miR-30a-5p, miR-615-3p, miR-345-3p, miR-134, miR-128-3p, let-7d, miR-133a-3p, miR-365a-5p, miR-378c, miR-145-3p, miR-323-3p, miR-26c, miR-3969, miR-410-5p, miR-29b-3p, miR-135a-1-3p, miR-28-5p, miR-486b-3p, miR-138-5p, miR-767-5p, miR-370-3p, miR-615-5p, miR-215-5p, miR-2284n, miR-34c-5p, miR-3154, miR-7144-5p, miR-485-5p, miR-363-5p, miR-296-3p, miR-345-5p, miR-125a-5p, miR-1343-5p, miR-665, miR-130a-3p, miR-133b-5p, miR-6238, miR-2284d, miR-185-5p, let-7g-5p, miR-873a-5p, miR-1285, miR-2889, miR-7862, miR-29b, miR-138, miR-30b-3p, miR-380-3p, miR-2284ab, miR-1260b, miR-3957-3p, novel\_101, miR-542-5p, miR-135a-2-3p, miR-449a, miR-326-3p, miR-2428, miR-3959-3p, miR-371b-3p, miR-323c, miR-34c, miR-16a, let-7i, miR-33a-3p, miR-



miR-6516-3p, miR-450b-3p, miR-338-5p, miR-6134, miR-4510, miR-378c, miR-582-5p, novel\_99, let-7f-1-3p, miR-323-5p, miR-6130, miR-544-3p, miR-204-3p, miR-660-5p, miR-378a-3p, miR-221-5p, miR-182-5p, miR-21-3p, miR-221-5p, miR-30b-3p, miR-125b, miR-185-3p, miR-216a-5p, miR-125b-2-3p, miR-146a-5p, miR-2411, miR-216c-5p, let-7a-3p, miR-378d, novel\_133, miR-5703, miR-2904, miR-148b-3p, miR-200b, miR-222-5p, miR-199a-3p, miR-3600, miR-371a-5p, miR-2285y, miR-154a, miR-541-3p, novel\_60, miR-3059-5p, miR-452-5p, miR-194b-5p, miR-877-3p, miR-199b-5p, miR-129b-5p, miR-3082-5p, miR-378e, miR-27a-3p, miR-452-3p, miR-20a-3p, miR-3955-3p, miR-2957, miR-30c-1-3p, miR-193a, miR-33a-5p, miR-2426, miR-450b-5p, miR-544a, miR-378c, miR-2284aa, miR-4791, miR-378b, miR-30b-3p, miR-7857, miR-2320-3p, miR-9788-3p, miR-105-1, miR-409b, miR-27a-3p, miR-138-5p, miR-486b-3p, miR-204-5p, miR-410-3p, miR-2332, miR-410-5p, miR-409-3p, miR-135a-5p, miR-331-3p, miR-365a-5p, miR-378c, miR-3607-3p, miR-10b-3p, miR-488-3p, miR-3154, miR-154b-5p, miR-199a-5p, miR-200c-3p, miR-2898, miR-543-5p, miR-200c, miR-217, miR-30c-2-3p, miR-490-3p, miR-1271-3p, miR-376c-5p, miR-199a-5p, miR-376b-5p, miR-3529-3p, miR-4286, miR-300, miR-411-3p, miR-200b-3p, miR-105-2, miR-128-3p, miR-134, miR-3578, miR-378h, miR-2411-5p, miR-502b, miR-203b-5p, miR-24-3p, miR-211, miR-495-3p, miR-3957-3p, miR-450b-3p, miR-6516-3p, miR-6395, miR-135b-5p, miR-379-5p, miR-670-3p, miR-146b-3p, miR-323a-5p, miR-378b, miR-655-5p, miR-124-5p, miR-1343-5p, miR-452-5p, miR-125a-5p, miR-660, miR-654-3p, miR-345-5p, miR-130b-5p, miR-363-5p, miR-2483-5p, miR-30b-3p, miR-138, miR-1285, miR-3071-5p, miR-194-5p, miR-432-5p, miR-544b, miR-2355-3p, miR-6238, miR-26b-3p, miR-130a-3p, miR-665, novel\_74, miR-130b-5p, miR-454-3p, miR-4492, miR-2285i, let-7b-3p, miR-3604, miR-346, miR-98-3p, miR-6525, miR-376c-5p, miR-376b-5p, miR-148b-5p, miR-28b, miR-185-3p, miR-342, miR-326, miR-107, miR-660, miR-543-5p, miR-2285o, miR-191-3p, miR-133b-5p, novel\_4, miR-103a-3p, miR-2300a-5p, miR-103, miR-134-3p, miR-539-5p, miR-2904, miR-330-5p, miR-342-3p, miR-3074-5p, miR-122-5p, miR-326-3p, miR-664a-5p, miR-425-5p, miR-2285j, miR-2332, miR-135a-1-3p, miR-28c, miR-22-5p, miR-574-5p, miR-3074-5p, miR-660-5p, miR-7857-3p, miR-378g, miR-411, miR-107

SEMA4D ENSOARGOC sema dom miR-135a-5p, miR-149-5p, miR-135b-5p

ANO5 ENSOARGOC anoctami miR-135a-5p, miR-149-5p, miR-135b-5p

miR-15a-5p, miR-200b, miR-378h, miR-758-5p, miR-23c, miR-6516-5p, miR-322-5p, miR-7859, miR-23b-3p, miR-429-3p, miR-3600, miR-582-3p, miR-200b-3p, miR-128-3p, miR-378i, miR-378a-3p, miR-2427, miR-148b-5p, miR-3065-3p, miR-29b-2-5p, miR-466i-5p, miR-760-3p, miR-200c-3p, miR-21-3p, miR-1277-5p, miR-200c, miR-205-5p, miR-422a, miR-216b-5p, miR-6516, miR-15b-5p, miR-378a-3p, miR-545-3p, miR-3065-3p, miR-2312, miR-1827, novel\_48, miR-21a-3p, miR-488-3p, miR-23b, miR-346, miR-378c, miR-3074-5p, miR-378c, miR-16-5p, miR-664a, miR-424-5p, miR-129-5p, miR-149-5p, miR-216a-3p, miR-27a-3p, miR-378c, miR-1388-5p, miR-16b, miR-3120-5p, miR-27b-3p, miR-2284x, miR-497-5p, miR-16-2-3p, miR-542-3p, miR-378b, miR-378d, miR-424-5p, miR-23a-3p, miR-16b, miR-182-5p, miR-378e, miR-27a-3p, miR-4443, miR-378b, miR-3074-5p, novel\_68, miR-26b-5p, miR-320b, miR-136-5p, miR-378f, miR-195a-5p, miR-2285ab, miR-3065-5p, miR-129b-5p, miR-216a-3p, miR-2428, miR-2285x, miR-2285f, miR-15a, novel\_82, miR-16a-5p, miR-1306-3p, miR-1306-3p, miR-153-3p, miR-340-3p, miR-193a-5p, miR-665-5p, miR-3956, miR-103b, miR-7857-3p, miR-153, miR-496-5p, miR-877-3p, miR-3187-3p

ZC3H13 ENSOARGO(zinc fin. miR-125a-3p, miR-6119-5p, miR-30f, miR-185-3p, miR-3085-3p, miR-196b-5p, miR-181b-5p, miR-106b-3p, miR-30d, novel\_127, miR-214-3p, miR-3064-5p, miR-2887, miR-148b-5p, miR-196a-5p, miR-2284r, miR-181a-5p, miR-30a-5p, miR-18a-3p, novel\_4, miR-455-3p, miR-2355-3p, miR-218-5p, miR-6529b, miR-5100, miR-29d-5p, miR-664a, miR-1843a-3p, miR-3964, miR-4492, miR-592, miR-2447, miR-181d-5p, miR-214, miR-361-3p, miR-29c-5p, miR-181c-5p, miR-488-3p, miR-30e-5p, miR-30d-5p, miR-3591-3p, miR-18a-3p, miR-876-3p, miR-543-3p, miR-2319a, miR-877-3p, miR-3064-5p, miR-452-3p, miR-874-3p, miR-3068-3p, miR-21-3p, miR-2285aa, miR-552-3p, miR-2284s, miR-204-3p

VAT1L ENSOARGO(vesicle miR-204-3p

C1orf234 ENSOARGO(chromosome

miR-6517, miR-2285ad, miR-7641, miR-2411-5p, miR-505-5p, miR-582-3p, miR-450a-1-3p, miR-3578, miR-345-3p, miR-885-3p, miR-105-2, miR-181a-2-3p, miR-3064-5p, miR-495-5p, miR-24-2-5p, miR-28b, miR-450b-5p, miR-1957a, novel\_39, miR-3065-3p, miR-29a-5p, miR-2284y, miR-664-3p, miR-1260a, miR-2285af, miR-3071-3p, miR-450a-2-3p, miR-17-3p, novel\_96, miR-107, miR-487a-3p, miR-370-3p, miR-488-3p, miR-3154, miR-345-5p, miR-2318, miR-485-5p, miR-671-5p, miR-1248, miR-7144-5p, miR-1306-5p, miR-144-5p, miR-133a-3p, miR-193a-5p, miR-1197-3p, miR-1260b, miR-365a-5p, miR-2433, miR-331-3p, miR-28-5p, miR-133b-5p, miR-103a-3p, miR-122-3p, miR-31-5p, miR-3431, miR-134-3p, miR-185-5p, miR-2285g, miR-103, miR-2355-3p, miR-194-3p, miR-6238, miR-1285, miR-3071-5p, miR-450c-3p, miR-16-1-3p, miR-1260b, miR-30b-3p, miR-2284x, miR-6240, miR-130b-5p, miR-628-5p, miR-2483-5p, miR-101-5p, miR-432-3p, miR-432-3p, miR-345-5p, let-7j, miR-2411-3p, novel\_51, miR-365b-5p, miR-330-3p, miR-105-5p, miR-2285l, miR-124-5p, miR-193a-3p, miR-452-5p, miR-26b-5p, miR-3120-3p, miR-320b, miR-2404, miR-146b-3p, miR-6535, miR-2285ab, miR-3970, miR-107, miR-410-5p, miR-17-3p, miR-193b-3p, miR-24-3p, miR-2428, miR-28c, miR-4324, miR-128-1-5p, miR-502b, miR-656-5p, miR-203b-5p, miR-22-5p, miR-212-5p, miR-1b-3p, miR-532-3p, miR-2366, miR-1197-5p, miR-188-3p, miR-1193, miR-140-3p, miR-124-3p, miR-2904, novel\_73, miR-2284u, miR-16-1-3p, miR-133a-3p, miR-487a, miR-345-3p, miR-143-3p, miR-2432, miR-2411, novel\_17, miR-26a-5p, miR-618, miR-345-3p, miR-92a-1-5p, miR-324-3p, miR-219b-5p, miR-760-3p, miR-2484, miR-21-3p, miR-221-5p, miR-504-5p, miR-221-5p, miR-552-3p, miR-216b-3p, miR-154a-3p, miR-3065-3p, miR-193b-3p, miR-139-5p, miR-6130, miR-499b-3p, miR-132-5p, miR-582-5p, miR-877-5p, novel\_39, miR-450a-1-3p, miR-2285c, miR-

miR-6240, miR-668-3p, miR-2284l, let-7j, let-7a-2-3p, miR-146a, miR-330-3p, miR-17-5p, miR-106a-5p, miR-483-3p, miR-130a-3p, miR-20b, miR-1434-3p, novel\_23, miR-2284ab, miR-219a-1-3p, miR-26a-2-3p, miR-2284x, miR-301b-3p, miR-20a-5p, novel\_87, miR-147-5p, miR-378b, miR-670-3p, miR-2387, miR-148a-3p, miR-376b-3p, miR-3065-5p, miR-19a-3p, miR-146b-5p, miR-2319a, miR-378f, miR-505-3p, miR-376a-2-5p, miR-3529-3p, miR-148b-5p, miR-29a-5p, miR-2285b, miR-376b-3p, miR-200c, miR-217, miR-450a-2-3p, miR-200c-3p, miR-152-3p, miR-6517, miR-429-3p, miR-376a-5p, miR-9-5p, miR-483-3p, miR-6516-5p, miR-378h, miR-3591-5p, miR-3578, miR-2427, miR-200b-3p, let-7a-2-3p, miR-93, miR-378c, miR-34c-3p, miR-494-5p, miR-2332, miR-5100, miR-100-3p, miR-3969, miR-3068-3p, miR-93-5p, miR-17-5p, let-7g-3p, miR-20b-5p, miR-1814c, miR-106a-5p, miR-494-3p, miR-378d, miR-2310, miR-106b-5p, miR-182-5p, miR-130b-3p, miR-146b, miR-330-3p, miR-548w, miR-151a-3p, miR-376b-3p, miR-148b-5p, miR-484, miR-378b, miR-2284r, miR-378c, miR-299a-5p, miR-101c, miR-1839-5p, miR-32-3p, miR-9-5p, miR-877-3p, novel\_111, miR-154a, miR-7705, miR-2440, miR-2319b, miR-499b-5p, miR-378e, miR-2483-3p, miR-3082-5p, miR-195a-3p, miR-20a, miR-146a-5p, miR-618, miR-422a, miR-106a, miR-466i-5p, miR-106a, miR-505-3p, miR-200b, miR-222-5p, miR-148b-3p, novel\_83, miR-378i, miR-5703, miR-1434-5p, miR-217-5p, miR-378a-3p, miR-19b-3p, miR-148a-5p, miR-378c, miR-3184-3p, miR-6525, miR-338-3p, miR-151-3p, miR-454-3p, miR-140-5p, miR-378a-3p, miR-545-3p, miR-32-3p, miR-301a-3p, miR-6516, miR-582-5p, miR-877-5p, miR-299, miR-487b-5p, let-7g-3p, novel\_99, miR-582-5p

CALD1

ENSOARGO(caldesmo)

miR-1197-5p, miR-2408, miR-2300b-3p, miR-133a-3p, miR-142-3p, miR-548e-3p, miR-1247-5p, miR-7859, miR-92a-1-5p, miR-125b, miR-185-3p, miR-345-3p, miR-324-3p, miR-30b-3p, miR-760-3p, miR-345-3p, miR-2887, miR-183-5p, miR-29b-1-5p, miR-500a-3p, miR-450a-1-3p, miR-296-3p, miR-3065-3p, miR-548o-3p, miR-2331-3p, miR-504-5p, miR-204-3p, miR-6130, miR-6516, miR-4492, miR-500, miR-664a, miR-450b-3p, miR-214, miR-4510, miR-3074-5p, miR-145a-3p, miR-3184-5p, miR-30b-3p, miR-541, miR-296-5p, miR-3120-5p, miR-145b, novel\_78, miR-1343-3p, miR-9788-3p, miR-29b-1-5p, novel\_19, miR-5126, miR-326, miR-214-3p, miR-491-5p, miR-3085-3p, miR-2330-5p, miR-574-3p, miR-1388-3p, miR-4532, miR-361-3p, miR-504, miR-147-3p, miR-211-5p, miR-7977, miR-452-3p, miR-3064-5p, miR-4443, miR-3596, miR-615, novel\_82, miR-3968, miR-452-5p, miR-541-3p, miR-3059-5p, miR-2447, miR-423-5p, miR-361-3p, miR-877-3p, miR-330-5p, miR-1343-5p, miR-345-3p, miR-615-3p, miR-1224-5p, miR-486-5p, miR-214-5p, miR-450a-1-3p, miR-6516-5p, miR-505-5p, miR-543-5p, novel\_96, miR-191-3p, miR-450a-2-3p, miR-181a-2-3p, miR-3064-5p, miR-3065-3p, novel\_39, miR-29a-5p, miR-671-5p, miR-485-5p, miR-23a-5p, miR-615-5p, miR-125a, miR-542-5p, miR-370-3p, miR-324-5p, miR-300-3p, miR-331-3p, miR-125b-5p, miR-6740-5p, miR-204-5p, miR-138-5p, miR-193a-5p, miR-181a-2-3p, novel\_42, miR-365a-5p, miR-145a-5p, miR-3071-5p, miR-450c-3p, miR-744-5p, miR-4508, miR-125b-1-3p, miR-30b-3p, miR-138, miR-340-3p, miR-187-3p, miR-149-5p, miR-432-5p, novel\_51, miR-2411-3p, miR-365b-5p, miR-3141, miR-1343-5p, miR-125a-5p, miR-2285l, miR-378a-5p, miR-432-3p, miR-432-3p, miR-3141, miR-1291, miR-3120-3p, miR-320b, miR-3074-5p, novel\_68, miR-669, novel\_69, miR-6529b, miR-133a-5p, miR-4324, miR-147-5p, miR-128-1-5p, miR-3957-3p, miR-2285m, novel\_27, miR-326-3p, miR-24-3p, miR-211, miR-424-5p, miR-34c-3p, miR-370-5p, miR-378c, miR-6134, miR-6128, miR-16-5p, miR-378c, miR-7144-5p, let-7g-3p, miR-339b, miR-204-3p, miR-15b-5p, miR-370-5p, miR-378a-3p, miR-574-5p, miR-504-5p, miR-548o-3p, novel\_127, miR-324-3p, miR-339a, miR-217, miR-422a, miR-2285af, miR-2432, miR-130a-5p, miR-128-3p, miR-378d, miR-378a-3p, miR-217-5p, miR-23b-5p, miR-1193, miR-378i, miR-3591-5p, miR-2284z, miR-302a-5p, miR-322-5p, miR-378h, miR-15a-5p, miR-7641, novel\_79, miR-18a-3p, miR-2285t, miR-16a, novel\_87, miR-15a, miR-877-3p, miR-361-3p, miR-371b-3p, novel\_111, miR-495-3p, miR-1193, miR-2447, miR-541-3p, miR-335-3p, miR-2319a, miR-195a-5p, miR-378f, miR-504, miR-18a-3p, miR-378j, miR-216a-3p, miR-2387, miR-669, miR-27a-3p, miR-378e, miR-670-3p, miR-124-5p, miR-16b, miR-296-3p, miR-296-3p, miR-378d, miR-424-5p, miR-497-5p, miR-3120-5p, miR-27b-3p, miR-1388-5p, miR-378c, miR-16b, miR-2426, miR-378b, miR-541, miR-149-5p, novel\_116, miR-216a-3p, miR-496-5p, miR-339-5p, miR-27a-3p, miR-222-5p

ANKRD29 ENSOARGO(ankyrin

miR-217-5p, miR-1246, miR-376a-5p, miR-493-3p, miR-30d-3p, miR-548e-3p, miR-328-3p, miR-23c, miR-200b, miR-23b-3p, miR-7859, miR-125b, miR-210-5p, miR-618, miR-1277-5p, miR-760-3p, miR-466i-5p, miR-2424, miR-2432, miR-376c-3p, miR-433-3p, miR-21a-3p, miR-345-5p, miR-660-5p, miR-216b-5p, miR-376e-3p, miR-30a-3p, miR-30e-3p, miR-17-3p, miR-412-3p, miR-541, miR-6529a, miR-484, miR-3120-5p, miR-2426, miR-101a-5p, miR-5010-3p, miR-1298-3p, miR-505, miR-1306-5p, miR-33a-5p, miR-23a-3p, let-7c-3p, miR-129b-5p, novel\_94, miR-136-5p, miR-7977, miR-499b-5p, miR-20a-3p, miR-203-3p, miR-3596, miR-2440, miR-628-3p, miR-3968, miR-194b-5p, miR-541-3p, miR-885-5p, miR-212-3p, miR-3956-3p, novel\_60, miR-3059-5p, miR-7705, novel\_111, miR-877-3p, miR-200b-3p, miR-128-3p, miR-411-3p, miR-376a-5p, miR-1224-5p, miR-412, miR-217, miR-200c, miR-2397-5p, miR-200a-3p, miR-543-5p, miR-200c-3p, miR-17-3p, miR-181a-2-3p, miR-30a-3p, miR-200a, miR-29a-5p, miR-23b, miR-3074-1-3p, miR-7144-5p, miR-190a-3p, miR-345-5p, let-7g-3p, miR-125a, miR-141-3p, miR-2355-5p, miR-2285aa, miR-376c-3p, miR-223-5p, miR-331-3p, miR-125b-5p, miR-2332, miR-6128, miR-3071-5p, miR-194-5p, miR-26b-3p, novel\_116, miR-194a, miR-2285v, miR-466f-3p, miR-125a-5p, miR-660, miR-363-5p, miR-668-3p, miR-345-5p, miR-654-3p, miR-378b, miR-216a-3p, miR-3970, miR-1306, miR-2387, miR-6395, miR-6516-3p, miR-376a-2-5p, miR-3120-3p, miR-146b-3p, miR-576-3p, miR-502-5p, miR-421-5p, miR-379-3p, miR-17-3p, miR-136-3p, miR-2284w, novel\_27

miR-204-5p, miR-6740-5p, miR-5100, miR-370-5p, miR-378c, miR-133a-3p, miR-16-5p, miR-1248, miR-329a, miR-10b-3p, miR-23b, miR-488-3p, miR-503-3p, miR-574-5p, miR-450a-2-3p, miR-17-3p, miR-339a, miR-490-3p, miR-450c-5p, miR-2285b, miR-450b-5p, miR-30a-3p, miR-1290, miR-3578, miR-345-3p, miR-378h, miR-758-5p, miR-322-5p, miR-9-5p, miR-505-5p, miR-412, novel\_79, miR-656-5p, miR-22-5p, miR-16a, miR-15a, miR-2284w, miR-2285m, miR-211, novel\_101, miR-17-3p, miR-1193, novel\_120, miR-378f, miR-195a-5p, miR-412-3p, miR-378b, miR-3591-3p, miR-3970, miR-669, miR-146b-3p, miR-124-5p, miR-2411-3p, novel\_51, miR-296-3p, miR-224-5p, miR-539-3p, let-7j, miR-296-3p, miR-654-3p, miR-101-5p, miR-27b-3p, miR-188-5p, miR-7862, miR-497-5p, miR-4508, miR-16b, miR-145a-5p, novel\_23, miR-542-3p, miR-185-5p, miR-3431, miR-412-5p, miR-377-5p, miR-339-5p, miR-133b-5p, miR-129-5p, miR-424-5p, miR-17-3p, miR-6516-3p, novel\_74, miR-664a-5p, miR-665, miR-30a-3p, miR-30e-3p, miR-122-5p, miR-224-5p, miR-378c, novel\_99, miR-339b, miR-133b-3p, let-7f-1-3p, miR-15b-5p, miR-216b-5p, miR-552-3p, miR-532-5p, miR-370-5p, miR-21-3p, miR-378a-3p, miR-1277-5p, miR-422a, miR-185-3p, miR-345-3p, miR-324-3p, novel\_17, miR-210-5p, miR-125b-2-3p, miR-377-5p, let-7a-3p, miR-133a-3p, miR-188-3p, miR-378a-3p, miR-124-3p, miR-2300b-3p, miR-362-3p, miR-378i, miR-15a-5p, miR-23c, miR-487a-3p, miR-95-3p, miR-23b-3p, miR-485-3p, miR-30d-3p, miR-450a-5p, miR-301a-5p, miR-371a-5p, miR-2440, miR-101-3p, miR-8095, miR-361-3p, miR-9-5p, miR-6527, miR-544-5p, miR-1983, miR-129b-5p, miR-378j, miR-361-3p, miR-27a-3p, miR-378e, miR-211-5p, miR-541-5p, miR-153-3p, miR-16b, miR-362-3p, miR-378d, miR-23a-3p, miR-424-5p, miR-124a, miR-2426, miR-362-3p, miR-378c, miR-412-3p, miR-301b-5p, miR-378b, miR-329-3p, miR-2320-3p, miR-153, miR-145b, miR-27a-3p, novel\_78, miR-877-3p, miR-425-3p, miR-361-3p, miR-2403, miR-8117, miR-2433, miR-361-3p, miR-2904

AUH

ENSOARGO(AU RNA b

TMEM179

ENSOARGO(transmem

miR-3064-5p, miR-30a-3p, miR-1271-3p, miR-490-3p, miR-20b-5p, miR-376b-3p, miR-2285af, miR-30c-2-3p, miR-3071-3p, miR-339a, miR-2898, miR-2285ad, novel\_79, miR-505-5p, miR-2284z, miR-450a-1-3p, novel\_121, miR-345-3p, miR-218-2-3p, miR-2427, miR-330-5p, miR-30a-5p, miR-300, miR-155-5p, miR-10a-5p, miR-374b, miR-93, miR-410-5p, miR-135a-1-3p, miR-5100, miR-191-5p, miR-204-5p, miR-370-3p, miR-215-5p, miR-300-3p, miR-133c, miR-223-5p, miR-30e-5p, miR-381-3p, miR-301, miR-93-5p, miR-17-5p, miR-7144-5p, miR-3074-1-3p, miR-20b-5p, miR-1814c, miR-130b-5p, miR-668-3p, miR-363-5p, miR-628-5p, let-7j, miR-7-5p, let-7d-3p, miR-17-5p, miR-106a-5p, miR-2411-3p, miR-339-5p, miR-3535, miR-185-5p, miR-411-5p, miR-2355-3p, miR-20b, miR-708-3p, miR-7b-5p, miR-2113, miR-1843b-5p, miR-1434-3p, miR-450c-3p, miR-16-1-3p, miR-188-5p, miR-219b-3p, novel\_120, novel\_101, miR-211, miR-24-3p, miR-326-3p, miR-2284w, miR-20a-5p, miR-382-5p, novel\_1, miR-199c, miR-216b-3p, miR-655-5p, miR-10a-5p, miR-411b-3p, novel\_69, miR-2387, miR-3970, miR-376b-3p, miR-3065-5p, miR-216c-5p, miR-195a-3p, miR-20a, miR-345-3p, miR-130a-5p, miR-2432, miR-618, miR-374a-5p, miR-500a-5p, miR-345-3p, miR-106a, miR-1277-5p, miR-3653-3p, miR-106a, miR-30d-3p, miR-210-3p, miR-340-5p, miR-191, miR-215-5p, miR-2300b-3p, miR-2366, miR-124-3p, miR-1193, miR-1434-5p, miR-188-3p, miR-5703, miR-33b-3p, novel\_73, miR-16-1-3p, miR-218-1-3p, miR-539-5p, miR-4510, miR-145a-3p, miR-3074-2-3p, miR-10b-5p, miR-122-5p, miR-15b-3p, miR-30e-3p, miR-30a-3p, miR-151-3p, miR-3604, miR-338-5p, miR-655-3p, miR-450b-3p, novel\_74, miR-155-5p, miR-874-5p, miR-130b-5p, miR-504-5p, miR-30c-1-3p, miR-545-3p, miR-552-3p, miR-10a, miR-192-5p, miR-6130, miR-299, miR-450a-1-3p, miR-655, miR-339b, miR-1827, miR-124a, miR-494-3p, miR-106a-5p, miR-30c-1-3p, miR-2310, miR-326, miR-106b-5p, miR-



miR-2284aa, miR-3120-5p, miR-378c, miR-101a-5p, miR-450b-5p, miR-2426, miR-378b, miR-216a-3p, miR-2285e, miR-27a-3p, novel\_4, miR-2300a-5p, miR-3955-3p, novel\_103, miR-758-3p, miR-106a-5p, miR-382-3p, miR-494-3p, miR-424-5p, miR-129b-5p, miR-361-3p, miR-199b-5p, miR-27a-3p, miR-378e, miR-3082-5p, miR-541-5p, miR-499b-5p, miR-2285t, miR-374a-3p, miR-2284q, miR-4726-5p, miR-335, miR-382-3p, miR-30b-5p, miR-8095, miR-9-3p, miR-154a, miR-2285f, miR-1296-5p, miR-194b-5p, miR-452-5p, miR-181d-5p, let-7a-3p, miR-1197-5p, miR-140-3p, miR-199a-3p, miR-616-3p, miR-532-3p, miR-200b, miR-340-5p, miR-148b-3p, miR-15a-5p, miR-30b-3p, miR-106a, miR-2284m, miR-216a-5p, miR-125b, miR-2432, miR-146a-5p, miR-29b-1-5p, miR-20a, miR-216c-5p, miR-2312, miR-30f, miR-27b-5p, miR-21a-3p, let-7f-1-3p, miR-6130, miR-656-3p, miR-370-5p, miR-21-3p, miR-182-5p, miR-378a-3p, miR-660-5p, miR-424-5p, miR-29b-2-5p, miR-6134, miR-3074-2-3p, miR-378c, miR-539-5p, miR-4510, miR-380-3p, miR-2284ab, miR-1260b, miR-194-5p, miR-3071-5p, miR-653, miR-181a-5p, miR-1285, miR-1434-3p, miR-20b, miR-2284d, miR-2285g, miR-185-5p, miR-665, miR-130a-3p, miR-26b-3p, miR-133b-5p, miR-1343-5p, miR-125a-5p, miR-660, miR-124-5p, miR-330-3p, miR-17-5p, miR-106a-5p, miR-224-5p, miR-345-5p, miR-101-5p, miR-130b-5p, miR-6395, miR-195a-5p, miR-376a-2-5p, miR-1291, miR-18a-3p, miR-2285ab, miR-655-5p, miR-7-1-3p, miR-92a-3p, novel\_1, miR-16a, miR-382-5p, miR-15a, miR-133a-5p, miR-20a-5p, novel\_27, miR-1193, miR-495-3p, miR-128-3p, miR-200b-3p, miR-411-3p, miR-3578, miR-545-5p, miR-378h, miR-376a-5p, miR-423-3p, miR-92a-3p, miR-2898, miR-181b-5p, miR-200c-3p, miR-1260a, miR-2285af, miR-200c, miR-199a-5p, miR-490-3p, miR-2284a, miR-29b-2-5p, miR-30a-3p, miR-7144-5p, miR-1814c, miR-10b-3p, miR-17-5p, miR-199a-5p, miR-2284n, miR-154b-5p, miR-3065, miR-370-3p, miR-141-3p, miR-

miR-2284ab, miR-219a-1-3p, miR-1260b, miR-3071-5p, miR-653, miR-181a-5p, miR-20b, miR-377-5p, miR-187-3p, miR-660, miR-452-5p, miR-17-5p, miR-106a-5p, miR-345-5p, miR-654-3p, miR-135b-5p, miR-376a-2-5p, miR-18a-3p, miR-670-3p, miR-34b, miR-7-1-3p, miR-363, miR-378b, miR-203b-5p, miR-147-5p, miR-92a-3p, miR-34c, miR-3613, miR-6529b, miR-20a-5p, miR-449a, miR-2428, miR-24-3p, miR-323c, miR-495-3p, miR-17-3p, miR-1193, miR-105-2, miR-200b-3p, let-7a-2-3p, miR-30a-5p, miR-345-3p, miR-378h, miR-6516-5p, miR-7641, miR-376a-5p, miR-222, miR-92a-3p, miR-450a-2-3p, miR-17-3p, miR-181b-5p, miR-200c-3p, miR-1260a, miR-200c, miR-6119-5p, miR-490-3p, miR-2385-3p, miR-30a-3p, miR-29b-2-5p, miR-3529-3p, miR-3074-1-3p, miR-7144-5p, miR-485-5p, miR-10b-3p, let-7g-3p, miR-320a, miR-17-5p, miR-3154, miR-34c-5p, miR-374c-3p, miR-487a-3p, miR-374b-3p, miR-486b-3p, miR-409-3p, miR-135a-5p, miR-3969, miR-1-5p, miR-370-5p, miR-378c, miR-93, miR-374a-3p, miR-378c, miR-101a-5p, miR-450b-5p, miR-299a-5p, miR-125b-2-3p, miR-378b, miR-4791, miR-9788-3p, miR-221-3p, miR-27a-3p, miR-105-1, miR-3955-3p, miR-320b, let-7c-3p, miR-652-5p, miR-494-3p, miR-106a-5p, novel\_94, miR-27a-3p, miR-378e, miR-664b, miR-452-3p, miR-4726-5p, miR-371a-5p, miR-30b-5p, miR-2285n, miR-181d-5p, miR-4429, miR-5703, miR-1246, miR-616-3p, miR-383-5p, miR-200b, miR-340-5p, miR-3600, miR-548e-3p, miR-30d, miR-1277-5p, miR-34b-5p, miR-221-5p, miR-21-3p, miR-320d, miR-106a, miR-29b-1-5p, miR-125b-2-3p, miR-20a, miR-183-5p, miR-154b-3p, miR-30f, miR-3613-5p, miR-204-3p, miR-6516, miR-370-5p, miR-21-3p, miR-182-5p, miR-221-5p, miR-545-3p, miR-378a-3p, miR-660-5p, miR-17-3p, miR-338-5p, miR-29b-2-5p, miR-222-3p, miR-338-3p, miR-425-5p, miR-3074-2-3p, miR-378c, miR-2284x, miR-27b-3p, miR-197-3p, miR-450c-3p, novel\_23, miR-223-3p, miR-542-3p, miR-411-5p, miR-let-7a-5p, let-7b, miR-2447, miR-541-3p, let-7g, let-7b-5p, miR-326-3p, let-7f, miR-326, miR-6740-5p, let-7i, let-7c-5p, miR-98-5p, let-7f-5p, let-7k, let-7e, miR-412, miR-412-5p, let-7g-5p, miR-204-3p, let-7d-5p, let-7i-5p, miR-541, miR-1961, miR-412-3p, miR-330-5p, let-7d, novel\_73, let-7e-5p, miR-4510, miR-26b-3p, miR-6130, miR-544b, miR-2904, miR-1343-5p, miR-30b-3p, miR-4726-5p, miR-450a-2-3p, miR-30b-3p, miR-544a, miR-381-5p, miR-1343-5p, miR-1248, miR-381-5p, miR-4286, novel\_42, miR-380-3p, miR-154a, miR-2432, miR-200a, miR-100-3p, miR-485-3p, miR-2957, miR-2285y, miR-494-5p, miR-135a-1-3p, miR-2440, miR-2285n, miR-21-3p, miR-374b-3p, miR-6516-3p, miR-487b-5p, novel\_1, miR-485-3p, miR-2285ad, miR-3596, miR-7857-3p, miR-487b-5p, miR-150-5p, miR-197-3p, miR-2300b-3p, miR-2284x, miR-544-5p, miR-543-3p, miR-380-3p, miR-132-5p, miR-3065-3p, novel\_42, miR-423-3p, miR-3065-3p, miR-2887, miR-138-5p, miR-138, miR-30b-3p, miR-4492, novel\_17, miR-2366, miR-1306-5p, miR-1306, novel\_51, miR-1843b-5p, miR-670-3p, miR-211-5p, miR-615-5p, miR-2355-5p, miR-370-3p, miR-2898, miR-486b-3p, miR-204-5p, miR-4492, novel\_17, miR-185-3p, miR-376a-5p, miR-211, miR-6134, miR-486-3p, miR-3059-5p

miR-6240, miR-363-5p, let-7j, let-7a-2-3p, miR-503-3p, miR-377-3p, miR-330-3p, miR-32, miR-365b-5p, novel\_51, miR-483-3p, miR-196b-5p, miR-125a-5p, miR-133b-5p, miR-103a-3p, miR-377-5p, miR-432-5p, miR-412-5p, miR-6238, miR-544b, miR-103, miR-432, miR-542-3p, miR-1843b-5p, miR-197-3p, miR-22-3p, miR-374b-3p, miR-138, miR-30b-3p, miR-380-3p, miR-16-1-3p, miR-125b-1-3p, miR-4508, miR-2284x, miR-7862, miR-342-3p, miR-2285x, novel\_101, miR-24-3p, miR-326-3p, miR-2428, miR-4324, miR-142b, miR-92a-3p, miR-502b, novel\_68, miR-323a-5p, miR-2404, miR-299b-3p, miR-374c-3p, miR-677, miR-144-3p, miR-181b-3p, miR-148a-3p, miR-18a-3p, miR-3065-5p, miR-216a-3p, miR-450b-3p, miR-410-5p, miR-107, miR-3529-3p, miR-3064-5p, miR-2403, miR-92b-3p, miR-2284y, miR-1957a, miR-2284a, miR-490-3p, miR-192-3p, miR-2285af, miR-219-3p, miR-30f, miR-450a-2-3p, miR-2898, miR-127-5p, miR-107, miR-152-3p, novel\_127, miR-92a-3p, miR-2285ad, miR-299a-3p, miR-1224-5p, miR-505-5p, miR-483-3p, miR-1271-5p, miR-6516-5p, miR-582-3p, miR-545-5p, miR-486-5p, miR-3591-5p, miR-345-3p, miR-196a-5p, miR-1290, miR-3578, miR-330-5p, miR-582-3p, miR-128-3p, let-7a-2-3p, miR-1306-5p, miR-6128, miR-1197-3p, miR-365a-5p, miR-410-5p, novel\_63, miR-2284k, miR-125b-5p, miR-144, miR-331-3p, miR-6740-5p, miR-138-5p, miR-28-5p, miR-592, miR-3068-3p, miR-370-3p, miR-125a, miR-365a-3p, miR-25-3p, miR-488-3p, miR-503-3p, miR-200a-5p, miR-3154, miR-876-3p, let-7g-3p, miR-7144-5p, miR-485-5p, miR-1814c, miR-382-3p, miR-2284b, miR-8485, miR-2310, miR-758-3p, miR-342, novel\_103, miR-326, miR-2957, miR-3085-3p, miR-487b-5p, miR-3955-3p, miR-153-3p, miR-214-3p, miR-548w, novel\_4, miR-330-3p, miR-181b-2-3p, miR-153, miR-425-3p, miR-1298-3p, miR-142-5p, miR-455-3p, miR-9788-3p, miR-296-5p, miR-6529a, miR-484, miR-301b-5p, miR-541, miR-30b-3p, miR-758-3p, miR-1388-5p, miR-

novel\_11b, miR-320b, miR-758-3p, miR-2330-5p, miR-424-5p, miR-652-5p, miR-544a, miR-3120-5p, miR-16-2-3p, miR-484, miR-142-3p, miR-500-5p, miR-216a-3p, miR-5010-3p, miR-335, miR-3958-3p, miR-769-5p, miR-362-5p, miR-502-3p, miR-541-3p, miR-212-3p, miR-3059-5p, miR-181d-5p, miR-3082-5p, miR-7977, miR-541-5p, miR-320d, miR-2284m, miR-21-3p, miR-299-3p, miR-30b-3p, miR-34b-5p, miR-125b, miR-130a-5p, miR-29b-1-5p, miR-4429, miR-378d, novel\_133, miR-15a-5p, miR-532-3p, miR-3600, miR-664a, miR-17-3p, miR-208b-5p, miR-424-5p, miR-29b-2-5p, miR-320e, miR-206-3p, miR-145a-3p, miR-539-5p, miR-3074-2-3p, miR-21a-3p, miR-139-5p, miR-27a-5p, miR-544-3p, miR-22-3p, miR-204-3p, miR-496-3p, miR-140-5p, miR-532-5p, miR-1343-5p, miR-452-5p, miR-125a-5p, miR-1260b, miR-138, miR-2284ab, miR-7862, miR-1285, miR-873a-5p, miR-145a-5p, miR-2284d, miR-432-5p, miR-2355-3p, miR-544b, miR-6402, miR-15a, miR-34c, miR-16a, miR-24-3p, miR-211, miR-449a, miR-17-3p, miR-450b-3p, miR-195a-5p, miR-2387, miR-18a-3p, miR-378b, miR-34b, miR-146b-3p, miR-450a-2-3p, miR-17-3p, miR-1260a, miR-2284a, miR-1271-3p, miR-181a-2-3p, miR-1, miR-29b-2-5p, miR-30a-3p, miR-496, miR-345-3p, miR-501-3p, miR-7641, miR-138-5p, miR-204-5p, miR-486b-3p, miR-5100, miR-135a-5p, miR-409-3p, miR-331-3p, miR-500b-5p, miR-145-3p, miR-6128, miR-1814c, miR-485-5p, miR-7144-5p, miR-3074-1-3p, miR-362-5p, miR-320a, miR-3965, miR-769, miR-34c-5p, miR-2284n, miR-154b-5p, miR-141-3p, miR-130b-3p, miR-487b-5p, miR-214-3p, miR-153-3p, miR-431-5p, miR-16b, miR-29b-1-5p, miR-2310, miR-101b-3p, miR-574-3p, miR-2284b, miR-744-3p, miR-101c, miR-541, miR-301b-5p, miR-2284r, miR-758-3p, miR-1a-3p, miR-501-3p, miR-539-5p, miR-1298-3p, miR-147a, miR-153, miR-148b-5p, miR-1343-3p, miR-145b, miR-3968, miR-499a-5p, miR-101-3p, miR-218-5p, novel\_82, miR-301a-5p, miR-877-3p, miR-1260b, miR-181c-5p, miR-338-3p, miR-16-5p, miR-138-5p, miR-486b-3p, miR-134-5p, miR-28-5p, miR-424-5p, miR-874-5p, miR-708-5p, miR-665, miR-320e, miR-3965, miR-132-5p, miR-34c-5p, miR-15b-5p, miR-30c-1-3p, miR-2331-3p, miR-504-5p, miR-1271, miR-552-3p, miR-370-3p, miR-2355-5p, miR-339b, miR-1814c, miR-488-3p, miR-28b, miR-2478, miR-486-3p, novel\_39, miR-329a-5p, miR-181b-5p, miR-760-3p, miR-127-5p, novel\_127, miR-543-5p, miR-21-3p, miR-34b-5p, miR-125a-3p, miR-210-5p, miR-1260a, miR-185-3p, miR-339a, miR-30c-2-3p, miR-324-3p, miR-15a-5p, miR-505-5p, miR-322-5p, novel\_83, miR-134-5p, miR-6517, miR-18a-3p, novel\_79, miR-34a-5p, miR-16-1-3p, miR-134, miR-5703, miR-330-5p, miR-1343-5p, miR-24-3p, miR-361-3p, miR-326-3p, miR-449a, miR-335-5p, miR-541-3p, miR-181d-5p, miR-335, miR-203b-5p, miR-28c, miR-15a, miR-34c, miR-16a, miR-34b, novel\_69, miR-378g, miR-329-5p, novel\_68, miR-4792, miR-7977, miR-504, miR-3963, miR-1291, novel\_94, miR-195a-5p, miR-3141, miR-361-3p, miR-21c, miR-18a-3p, miR-129b-5p, miR-1306, miR-30c-1-3p, miR-2310, miR-4532, miR-8485, miR-424-5p, miR-127-3p, miR-628-5p, miR-1343-5p, miR-1306-5p, miR-326, miR-16b, miR-3141, miR-134-3p, miR-421, novel\_78, miR-339-5p, miR-1260b, miR-16-1-3p, miR-21-5p, miR-138, miR-16b, miR-497-5p, miR-541, miR-873a-5p

|           |                    |                                                                                                                                                                                                                                                                                                                                                                                                                                                                                                                                                                                                                                                                                                                                                                                                                                                                                                                                                                                                                                                                                                                                                                                                                                                                                                                                                                                                                                                                                                                                                                                                                                                                                                                                                                                                                                                                                                                                                                                                                                                                                                                                                                                                                                                                                                                                             |
|-----------|--------------------|---------------------------------------------------------------------------------------------------------------------------------------------------------------------------------------------------------------------------------------------------------------------------------------------------------------------------------------------------------------------------------------------------------------------------------------------------------------------------------------------------------------------------------------------------------------------------------------------------------------------------------------------------------------------------------------------------------------------------------------------------------------------------------------------------------------------------------------------------------------------------------------------------------------------------------------------------------------------------------------------------------------------------------------------------------------------------------------------------------------------------------------------------------------------------------------------------------------------------------------------------------------------------------------------------------------------------------------------------------------------------------------------------------------------------------------------------------------------------------------------------------------------------------------------------------------------------------------------------------------------------------------------------------------------------------------------------------------------------------------------------------------------------------------------------------------------------------------------------------------------------------------------------------------------------------------------------------------------------------------------------------------------------------------------------------------------------------------------------------------------------------------------------------------------------------------------------------------------------------------------------------------------------------------------------------------------------------------------|
| NELL1     | ENSOARGO(neural E) | miR-16-5p, miR-214, miR-424-5p, miR-16a, miR-16b, miR-15a, miR-424-5p, miR-214-3p, miR-31-5p, miR-15b-5p, miR-374c-3p, miR-322-5p, miR-15a-5p, miR-374c-3p, miR-3082-5p, miR-374b-3p, miR-497-5p, miR-195a-5p, miR-16b                                                                                                                                                                                                                                                                                                                                                                                                                                                                                                                                                                                                                                                                                                                                                                                                                                                                                                                                                                                                                                                                                                                                                                                                                                                                                                                                                                                                                                                                                                                                                                                                                                                                                                                                                                                                                                                                                                                                                                                                                                                                                                                      |
| KIAA0226I | ENSOARGO(KIAA0226) | miR-301b-3p, miR-3059-5p, miR-1271, miR-6516-3p, miR-454-3p, miR-130b-5p, miR-2285j, miR-323a-5p, miR-301a-3p, miR-323-5p, miR-2483-3p, miR-545-3p, miR-452-3p, miR-182-5p, miR-147-3p, miR-96-5p, miR-9851-3p, miR-186-5p, miR-6516-3p, miR-1827, miR-301, miR-143-3p, miR-216c-5p, miR-130b-5p, miR-130b-3p, miR-618, miR-182-5p, miR-432-5p, miR-1271-5p, miR-545-5p, miR-455-3p, miR-421, miR-7641, miR-130a-3p, miR-432, miR-2300b-3p, miR-218-2-3p, miR-23b-5p, miR-62b-5p, miR-34b-5p, miR-339b, miR-10a, miR-301a-3p, miR-151-3p, miR-30a-3p, miR-665, miR-30e-3p, miR-1468-5p, miR-454-3p, miR-4492, miR-190a-5p, miR-669a-3p, miR-130b-5p, miR-3958-5p, miR-214, miR-6525, miR-142a-5p, miR-346, miR-217-5p, miR-378a-3p, miR-378i, miR-2366, miR-16-1-3p, miR-142-3p, novel_73, miR-30d-3p, miR-500a-5p, miR-422a, miR-345-3p, miR-618, novel_17, miR-486-3p, miR-143-3p, miR-181b-1-3p, miR-142a-3p, miR-378j, miR-335-3p, miR-544-5p, miR-9-3p, miR-96-5p, miR-136-5p, miR-139-5p, miR-203-3p, miR-3596, miR-499a-5p, miR-190b-5p, miR-2447, miR-3956-3p, miR-877-3p, miR-323b, miR-1a-3p, miR-758-3p, miR-541, miR-101c, miR-1839-5p, miR-1388-5p, miR-181b-2-3p, miR-142-5p, miR-323b-3p, miR-29b-1-5p, miR-199b-5p, miR-214-3p, miR-130b-3p, miR-1388-3p, miR-101b-3p, miR-2310, miR-378d, miR-137-3p, miR-376c-5p, miR-345-5p, miR-329b, miR-2318, miR-3068-3p, miR-133c, miR-331-5p, miR-592, miR-134-5p, novel_9, miR-1260b, miR-1343-5p, miR-330-5p, miR-3591-5p, miR-412, novel_79, miR-2284z, miR-134-5p, miR-505-5p, miR-758-5p, miR-664-3p, miR-152-3p, miR-127-5p, miR-3064-5p, novel_39, miR-192-3p, miR-3970, miR-3591-3p, miR-216a-3p, miR-376b-5p, miR-148a-3p, miR-2319a, miR-378f, miR-410-5p, miR-320c, miR-677, miR-181b-3p, miR-374c-3p, miR-421-5p, miR-6123, miR-206, miR-193b-3p, miR-199b-5p, miR-301b-3p, novel_23, miR-708-3p, miR-432, miR-223-3p, miR-1843b-5p, miR-26a-2-3p, miR-27b-3p, miR-188-5p, miR-2284x, miR-16-1-3p, miR-339-5p, miR-194-3p, miR-3535, miR-2411-3p, miR-193a-3p, miR-668-3p, let-7a-2-3p, miR-432-3p, miR-432-3p, miR-370-5p, miR-21-3p, miR-221-5p, miR-378a-3p, miR-204-3p, miR-27a-5p, miR-193b-3p, miR-139-5p, miR-29b-2-5p, miR-320e, miR-208b-5p, miR-6516-3p, miR-664a, miR-1271, miR-2330-3p, miR-3074-2-3p, miR-378c, miR-145a-3p, miR-10b-5p, miR-206-3p, miR- |
| ZNF169    | ENSOARGO(zinc fin) |                                                                                                                                                                                                                                                                                                                                                                                                                                                                                                                                                                                                                                                                                                                                                                                                                                                                                                                                                                                                                                                                                                                                                                                                                                                                                                                                                                                                                                                                                                                                                                                                                                                                                                                                                                                                                                                                                                                                                                                                                                                                                                                                                                                                                                                                                                                                             |

miR-22-3p, novel\_23, miR-223-3p, miR-4508, miR-2889, miR-2284ab, miR-1260b, miR-130a-3p, miR-340-3p, miR-103a-3p, miR-133b-5p, miR-149-5p, miR-20b, miR-103, miR-2284d, miR-134-3p, miR-3141, miR-106a-5p, miR-17-5p, miR-377-3p, miR-296-3p, miR-1343-5p, miR-125a-5p, miR-126a-3p, miR-668-3p, miR-628-5p, miR-296-3p, miR-150-5p, miR-3591-3p, miR-3065-5p, miR-148a-3p, miR-3141, miR-2387, miR-505-3p, miR-376a-2-5p, miR-378f, miR-1291, miR-107, miR-655-5p, miR-3120-3p, miR-6535, miR-502-5p, miR-4324, miR-6402, miR-576-3p, miR-20a-5p, miR-22-5p, miR-502b, miR-147-5p, miR-6119-3p, miR-128-1-5p, miR-3957-3p, miR-17-3p, miR-1a-1-5p, miR-335-5p, miR-301b-3p, miR-2428, miR-24-3p, miR-1343-5p, miR-30a-5p, miR-885-3p, miR-300, miR-376a-5p, miR-431, miR-6517, miR-2284z, miR-545-5p, miR-378h, miR-30c-2-3p, miR-205-5p, miR-2285af, miR-1260a, miR-219-3p, miR-125a-3p, miR-107, miR-152-3p, miR-17-3p, miR-1a-2-5p, miR-3064-5p, miR-30a-3p, miR-181a-2-3p, novel\_39, miR-1271-3p, miR-2285b, miR-148b-5p, miR-450b-5p, miR-93-5p, miR-362-5p, miR-17-5p, miR-30e-5p, miR-381-3p, miR-20b-5p, miR-485-5p, miR-671-5p, miR-598-3p, miR-2355-5p, miR-542-5p, miR-615-5p, miR-125a, miR-324-5p, miR-2284n, miR-125b-5p, miR-551b-3p, miR-2433, miR-2284k, miR-1-5p, miR-126b-3p, novel\_42, miR-2284v, miR-378c, miR-500b-5p, miR-93, miR-1197-3p, miR-1260b, miR-323b, miR-758-3p, miR-378b, miR-1839-5p, miR-2284aa, miR-3120-5p, miR-378c, miR-1343-3p, miR-500-5p, miR-455-3p, miR-147a, novel\_19, miR-323b-3p, miR-106b-5p, novel\_115, miR-5126, miR-431-5p, miR-214-3p, miR-103a-2-5p, miR-3085-3p, miR-25-5p, miR-130b-3p, miR-652-5p, miR-574-3p, miR-101b-3p, miR-106a-5p, miR-494-3p, miR-4532, miR-758-3p, miR-378d, miR-30c-1-3p, miR-361-3p, miR-877-3p, novel\_94, miR-504, miR-139-5p, miR-3064-5p, miR-4443, miR-378a, miR-378c, miR-107-5p, miR-101-3p, miR-2284c, miR-1796-3p, miR-147a, miR-758-5p

PCID2 ENSOARG0(CI doma

TPD52L1 ENSOARG0(tumor pr

miR-362-3p, miR-501-3p, miR-7857, miR-30b-3p, miR-484, miR-329-3p, miR-296-5p, miR-541, miR-9788-3p, miR-216a-3p, miR-2459, novel\_4, miR-330-3p, miR-2300a-5p, miR-199b-5p, miR-214-3p, miR-25-5p, miR-362-3p, novel\_19, miR-326, miR-5126, miR-4532, miR-8485, miR-2330-5p, novel\_94, miR-1983, miR-877-3p, miR-504, miR-361-3p, miR-199b-5p, miR-500-3p, miR-3596, miR-378g, miR-499b-5p, novel\_82, miR-502-3p, miR-423-5p, miR-3059-5p, miR-2447, miR-541-3p, miR-2904, miR-217-5p, miR-140-3p, novel\_133, miR-2366, miR-362-3p, miR-21-3p, miR-324-3p, miR-125b, miR-345-3p, miR-185-3p, miR-2285p, novel\_17, miR-486-3p, miR-2887, miR-503-5p, miR-1895, miR-1827, miR-345-5p, miR-21a-3p, miR-204-3p, miR-22-3p, miR-193b-3p, miR-6130, miR-370-5p, miR-3065-3p, miR-504-5p, miR-2331-3p, miR-548o-3p, miR-874-5p, miR-664a, miR-664a-5p, miR-320e, miR-665, miR-3184-5p, miR-6134, miR-214, miR-2330-3p, miR-4510, miR-4508, miR-744-5p, miR-2889, miR-138, miR-30b-3p, miR-29b, miR-22-3p, miR-374b-3p, miR-873a-5p, miR-1843b-5p, miR-7b-5p, miR-194-3p, miR-503-5p, miR-134-3p, miR-185-5p, miR-3431, miR-133b-5p, miR-1343-5p, miR-125a-5p, miR-193a-3p, miR-378a-5p, miR-330-3p, miR-365b-5p, miR-3141, miR-2411-3p, miR-2331-5p, miR-503-5p, miR-7-5p, miR-345-5p, miR-6240, miR-9851-3p, miR-1291, miR-412-3p, miR-216a-3p, miR-3141, miR-29a-3p, miR-670-3p, miR-421-5p, miR-29a, miR-4324, miR-6529b, miR-326-3p, miR-199b-5p, miR-371b-3p, miR-323c, miR-24-3p, miR-3957-3p, miR-193b-3p, miR-29c-3p, miR-1193, miR-495-3p, miR-128-3p, miR-7134-5p, miR-29d-3p, miR-1343-5p, miR-330-5p, miR-501-3p, miR-345-3p, miR-543-5p, miR-2898, miR-217, novel\_39, miR-199a-5p, miR-3065-3p, miR-23a-5p, miR-7144-5p, miR-671-5p, miR-767, miR-329a, miR-345-5p, miR-3154, miR-199a-5p, miR-324-5p, miR-542-5p, miR-125a, miR-874-3p, miR-486b-3p, miR-138-5p, miR-767-5p, miR-

miR-2285c, miR-30d-5p, miR-154b-3p, miR-2312, miR-543-3p, miR-154a-3p, miR-370-5p, miR-377-3p, miR-6516, miR-30e-3p, miR-30a-3p, miR-3958-5p, miR-6525, miR-181c-5p, miR-2408, miR-30c-5p, miR-140-3p, miR-493-3p, let-7a-3p, miR-106a, miR-30d-3p, miR-212-5p, miR-3600, miR-200b, miR-487a-3p, miR-2285p, miR-618, miR-374a-5p, miR-30b, miR-2284m, miR-106a, miR-30d, miR-487a, miR-183-5p, miR-20a, miR-181b-1-3p, miR-664b-3p, miR-380-3p, miR-381-3p, miR-136-5p, miR-668-5p, miR-877-3p, miR-9-3p, miR-335-3p, miR-452-3p, miR-10b, miR-664b, miR-3064-5p, miR-378g, miR-3596, miR-1185-2-3p, miR-101-3p, miR-30b-5p, miR-2285n, miR-2285y, miR-499a-5p, miR-154-3p, miR-194b-5p, miR-181d-5p, miR-2285f, miR-7705, miR-9-3p, miR-450b-5p, miR-199b-3p, novel\_4, novel\_78, miR-548w, miR-181b-2-3p, miR-145b, miR-5010-3p, miR-539-5p, miR-2285e, miR-1185-3p, miR-216a-3p, miR-106b-5p, miR-487b-5p, miR-491-5p, miR-3085-3p, miR-106a-5p, miR-574-3p, miR-744-3p, miR-8485, miR-30e-5p, miR-17-5p, miR-93-5p, miR-3074-1-3p, miR-20b-5p, miR-190a-3p, miR-487a-3p, miR-615-5p, miR-1271, miR-370-5p, novel\_63, miR-29b-3p, miR-1-5p, miR-135a-5p, miR-93, miR-145-3p, miR-30a-5p, miR-29d-3p, miR-30c, miR-200b-3p, miR-429-3p, miR-6517, miR-2285ad, miR-6516-5p, miR-486-5p, novel\_121, miR-664-3p, miR-200c, miR-205-5p, miR-30f, miR-181b-5p, miR-200c-3p, novel\_96, miR-3064-5p, miR-30a-3p, miR-450b-5p, miR-1957a, miR-2285ab, miR-3970, miR-410-5p, miR-135b-5p, miR-655-5p, miR-29a-3p, miR-181b-3p, miR-677, miR-20a-5p, miR-382-5p, miR-29a, novel\_1, miR-199c, miR-203b-5p, miR-1a-1-5p, miR-29c-3p, miR-1193, novel\_27, miR-1434-3p, miR-181a-5p, miR-3071-5p, miR-145a-5p, miR-194-5p, miR-29b, miR-2284ab, miR-380-3p, miR-7862, miR-26b-3p, miR-134-3p, miR-185-5p, miR-2285g, miR-20b, miR-2355-3p, miR-411-5p, miR-377-3p, miR-194a, miR-106a-5p, miR-17-5p, let-7f-2, miR-361-3p, miR-652-5p, miR-4286, miR-452-5p, miR-128-1-5p, miR-466f-3p, miR-362-3p, miR-146b-3p, miR-4792, miR-6517, miR-362-3p, miR-493-3p, miR-329a, miR-329-3p, miR-361-3p, miR-362-3p

CNTN5

ENSOARGO(contacti

C19orf57 ENSOARGO(chromoso



miR-378c, miR-365a-5p, miR-133a-3p, miR-6128, miR-3607-3p, miR-486b-3p, miR-28-5p, miR-410-5p, miR-331-3p, miR-26c, miR-769, miR-365a-3p, miR-141-3p, miR-370-3p, miR-671-5p, miR-485-5p, miR-1814c, miR-1271-3p, miR-3065-3p, miR-4286, miR-2385-3p, miR-1, miR-200c-3p, miR-2898, miR-17-3p, miR-543-5p, miR-107, miR-6119-5p, miR-200c, miR-339a, miR-378h, miR-2411-5p, miR-214-5p, miR-7641, miR-10a-5p, miR-128-3p, miR-200b-3p, miR-345-3p, miR-501-3p, miR-24-3p, miR-326-3p, novel\_101, miR-17-3p, miR-3957-3p, miR-199c, miR-656-5p, miR-6529b, miR-15a, miR-16a, miR-670-3p, miR-10a-5p, miR-320b, miR-107, miR-19a-3p, miR-1291, miR-195a-5p, miR-6395, miR-2387, miR-654-3p, miR-345-5p, miR-296-3p, miR-2483-5p, miR-363-5p, miR-1343-5p, miR-224-5p, miR-330-3p, miR-197-5p, miR-432-5p, miR-103, miR-130a-3p, miR-30b-3p, miR-3071-5p, miR-374b-3p, miR-206-3p, miR-10b-5p, miR-6134, miR-539-5p, miR-378c, miR-2330-3p, miR-6516-3p, miR-664a, miR-17-3p, miR-708-5p, miR-424-5p, miR-19b-1-5p, miR-204-3p, novel\_32, miR-140-5p, miR-378a-3p, miR-221-5p, miR-545-3p, miR-3065-3p, miR-133b-3p, miR-125b-2-3p, miR-2411, miR-2432, miR-183-5p, miR-466i-5p, miR-760-3p, miR-21-3p, miR-221-5p, miR-148b-3p, miR-15a-5p, miR-200b, miR-532-3p, miR-1b-3p, miR-19b-3p, miR-2408, miR-376a-5p, novel\_133, miR-1197-5p, miR-188-3p, miR-5703, miR-502-3p, miR-541-3p, miR-3059-5p, miR-335, miR-450a-5p, miR-4726-5p, miR-107-5p, miR-769-5p, miR-378e, miR-147-3p, miR-877-3p, novel\_94, miR-361-3p, miR-193a, miR-424-5p, miR-2330-5p, miR-33a-5p, miR-326, miR-1306-5p, miR-142-3p, miR-216a-3p, novel\_4, miR-2300a-5p, miR-450b-5p, miR-2426, miR-378c, miR-3120-5p, miR-10b, miR-378b, miR-484, miR-296-5p, miR-125b-2-3p, miR-30b-3p, miR-1197-3p, novel\_42, miR-16-5p, novel\_9, miR-592, miR-2433, miR-6740-5p, miR-300-3p, miR-874-3p, miR-574-5p, miR-1271, miR-

miR-329a-5p, miR-2285i, miR-421-5p, miR-219b-5p, miR-324-3p, novel\_17, miR-26a-5p, let-7k, miR-98-5p, miR-30d-3p, miR-212-5p, miR-18a-3p, miR-217-5p, miR-1961, miR-16-1-3p, miR-34a-5p, novel\_73, miR-214, let-7b, miR-433-5p, miR-129-2-3p, miR-769-5p, miR-346, miR-224-5p, miR-30a-3p, miR-3604, miR-665, let-7f, miR-2285j, miR-30e-3p, miR-4492, miR-669a-3p, miR-216b-3p, miR-552-3p, miR-15b-5p, let-7i-5p, miR-377-3p, miR-543-3p, miR-1895, miR-186-5p, miR-1827, miR-2284b, miR-124a, miR-101b-3p, miR-505, miR-182-5p, miR-16b, miR-199a-3p, miR-199b-5p, miR-214-3p, miR-491-5p, miR-330-3p, miR-1185-3p, miR-758-3p, miR-1298-5p, miR-3956-3p, miR-361-3p, miR-877-3p, novel\_111, miR-2440, miR-101-3p, miR-3964, miR-2285u, miR-211-5p, miR-24-1-5p, miR-2319b, miR-221, miR-335-3p, miR-1983, miR-96-5p, let-7g, novel\_39, miR-29a-5p, miR-148b-5p, miR-125a-3p, miR-664-3p, novel\_127, novel\_96, miR-152-3p, let-7f-5p, miR-412, miR-299a-3p, miR-129-1-3p, miR-322-5p, miR-1343-5p, miR-16-5p, miR-1260b, miR-100-3p, miR-125b-5p, miR-2355-5p, miR-125a, miR-503-3p, let-7f-2-3p, let-7f-2-3p, miR-380-5p, miR-6240, miR-432-3p, miR-432-3p, miR-365b-5p, novel\_51, miR-7-5p, miR-377-3p, miR-149-5p, miR-194-3p, miR-708-3p, miR-7b-5p, miR-542-3p, miR-497-5p, miR-26a-2-3p, miR-16b, miR-16-1-3p, miR-374c-5p, miR-199b-5p, novel\_87, miR-4324, miR-28c, miR-576-3p, miR-421-5p, miR-26b-5p, novel\_68, miR-329-5p, miR-669, miR-144-3p, miR-320c, miR-299b-3p, novel\_69, miR-150-5p, miR-3591-3p, miR-3065-5p, miR-148a-3p, let-7e-5p, miR-412-3p, miR-125b-2-3p, miR-125b, miR-185-3p, miR-221-5p, miR-34b-5p, miR-30b-3p, miR-299-3p, miR-21-3p, miR-320d, miR-760-3p, miR-3600, miR-532-3p, miR-199a-3p, miR-148b-3p, miR-15a-5p, miR-124-3p, miR-1193, miR-188-3p, novel\_133, miR-2300b-3p, miR-378d, miR-4429, miR-1271, let-7b-5p, miR-324-3p, miR-320a, miR-222-

miR-1271, miR-125a, miR-141-3p, miR-3068-3p, miR-2284n, miR-365a-3p, miR-374c-3p, miR-3154, miR-376c-5p, miR-23b, miR-2448-3p, miR-30e-5p, miR-488-3p, miR-1814c, miR-671-5p, miR-376c-5p, miR-7144-5p, miR-345-5p, miR-876-3p, miR-767, miR-144-5p, miR-193a-5p, miR-3607-3p, miR-409-3p, miR-135a-5p, miR-125b-5p, miR-144, miR-5100, miR-370-5p, miR-486b-3p, miR-134-5p, miR-191-5p, miR-767-5p, miR-376a-5p, miR-412, miR-429-3p, miR-450a-1-3p, miR-134-5p, miR-545-5p, miR-483-3p, miR-30a-5p, miR-7134-5p, miR-3578, miR-134, miR-196a-5p, miR-345-3p, miR-128-3p, miR-30c, miR-200b-3p, miR-582-3p, miR-411-3p, miR-2403, miR-29b-2-5p, miR-30a-3p, miR-376c-5p, novel\_39, miR-29a-5p, miR-376b-5p, miR-148b-5p, miR-380-5p, miR-200c, miR-376b-3p, miR-200a-3p, miR-200c-3p, miR-127-5p, miR-7-1-3p, miR-26b-5p, miR-3120-3p, miR-378b, miR-144-3p, miR-670-3p, miR-374c-3p, miR-2404, miR-376b-3p, miR-216a-3p, miR-376b-5p, miR-2285ab, miR-376a-2-5p, miR-135b-5p, miR-6516-3p, miR-9851-3p, miR-19a-3p, miR-1193, miR-135a-2-3p, novel\_120, miR-2428, miR-2284w, miR-3959-3p, miR-24-3p, miR-323c, miR-6402, miR-133a-5p, miR-576-3p, miR-502b, miR-199c, miR-22-5p, miR-379-3p, novel\_1, miR-665, miR-31-5p, miR-6238, miR-149-5p, miR-2285g, miR-412-5p, miR-3535, novel\_23, miR-197-3p, miR-450c-3p, miR-1434-3p, miR-455-5p, miR-27b-3p, miR-16-1-3p, miR-219a-1-3p, miR-2284ab, miR-30b-3p, miR-628-5p, miR-2483-5p, miR-380-5p, miR-503-3p, miR-345-5p, miR-432-3p, miR-432-3p, miR-2411-3p, miR-455-5p, miR-224-5p, miR-125a-5p, miR-196b-5p, miR-483-3p, miR-296-3p, miR-370-5p, miR-140-5p, miR-504-5p, miR-151b, miR-877-5p, novel\_25, miR-139-5p, miR-30d-5p, miR-2285c, miR-450a-1-3p, miR-21a-3p, novel\_99, miR-186-5p, miR-345-5p, miR-30f, miR-2312, miR-3074-2-3p, miR-539-5p, miR-224-5p, miR-6525, miR-29b-2-5p, miR-30a-3p, miR-30a-3p, miR-208b-5p, miR-6516-3p, miR-3969, miR-320e, novel\_17, miR-200a-3p, miR-466f-3p, miR-335, miR-2355-5p, miR-141-3p, miR-26b-5p, miR-545-3p, miR-101b-3p, miR-335-5p, miR-200a, miR-2432, miR-145-3p, miR-301b-5p, miR-301a-5p, miR-450a-2-3p, miR-485-5p, miR-22-5p, miR-6517, miR-4792, miR-552-3p, miR-26b-3p, miR-185-5p, miR-6525, miR-6535, miR-669

GALNT13 ENSOARGO( polypept

PNPLA8 ENSOARGO( patatin-

LRCH1 ENSOARGO( leucine-

miR-2284b, miR-23a-3p, miR-16b, miR-182-5p, miR-323b-3p, miR-214-3p, miR-103a-2-5p, miR-130b-3p, miR-181b-2-3p, novel\_78, miR-2459, miR-1185-3p, miR-421, miR-455-3p, miR-147a, miR-323b, miR-541, miR-101c, miR-1388-5p, miR-2284j, miR-3956-3p, miR-2447, miR-7705, miR-423-5p, novel\_111, miR-2440, miR-3964, miR-490-5p, miR-3968, miR-499a-5p, miR-211-5p, miR-7689-3p, miR-374b-5p, miR-2319b, miR-24-1-5p, miR-2284g, miR-139-5p, miR-1185-2-3p, miR-144-5p, miR-2483-3p, miR-378j, miR-544-5p, miR-136-5p, miR-369-3p, miR-143-3p, miR-486-3p, miR-181b-1-3p, miR-376a-5p, miR-345-3p, miR-92a-1-5p, miR-324-3p, miR-219b-5p, novel\_17, miR-210-5p, miR-2484, miR-30d-3p, miR-328-3p, miR-23c, miR-7859, miR-23b-3p, miR-361-5p, miR-2284u, miR-16-1-3p, miR-214, miR-129-2-3p, miR-3184-5p, miR-769-5p, miR-6525, miR-665, miR-30a-3p, miR-151-3p, miR-30e-3p, miR-15b-3p, miR-2285j, miR-4492, miR-1468-5p, miR-454-3p, miR-874-5p, novel\_74, miR-296-3p, miR-2331-3p, miR-15b-5p, miR-301a-3p, miR-433-3p, miR-450a-1-3p, miR-625-5p, miR-885-3p, miR-543-3p, miR-345-5p, let-7a-2-3p, miR-2285r, miR-432-3p, novel\_51, miR-2411-3p, miR-3141, miR-3431, miR-450c-3p, miR-197-3p, miR-542-3p, miR-432, miR-19b-2-5p, miR-188-5p, miR-497-5p, miR-16-1-3p, miR-16b, miR-301b-3p, miR-142b, miR-28c, miR-625-3p, miR-6119-3p, miR-3120-3p, novel\_68, miR-181b-3p, miR-677, miR-374c-3p, miR-148a-3p, miR-3141, miR-376b-5p, miR-2319a, miR-2285b, miR-2284y, miR-29a-5p, miR-450b-5p, miR-152-3p, miR-6536, miR-127-5p, miR-129-1-3p, miR-134-5p, miR-450a-1-3p, miR-322-5p, miR-23b-5p, miR-2427, miR-885-3p, miR-144-5p, miR-16-5p, miR-2284v, miR-1260b, miR-2284k, miR-2433, novel\_63, miR-134-5p, novel\_9, miR-376c-5p, miR-23b, miR-137-3p, miR-1248, miR-345-5p, miR-424-5p, miR-5126, miR-1468, novel\_4, miR-151a-3p, miR-409b, miR-216a-3p, miR-125b-2-

|        |                    |                                                                                                                                                                                                                                                                                                                                                                                                                                                                                                                                                                                                                                                                                                                                                                                                                                                                                                                                                                                                                                                                                                                                                                                                                                                                                                                                                                                                                                                                        |
|--------|--------------------|------------------------------------------------------------------------------------------------------------------------------------------------------------------------------------------------------------------------------------------------------------------------------------------------------------------------------------------------------------------------------------------------------------------------------------------------------------------------------------------------------------------------------------------------------------------------------------------------------------------------------------------------------------------------------------------------------------------------------------------------------------------------------------------------------------------------------------------------------------------------------------------------------------------------------------------------------------------------------------------------------------------------------------------------------------------------------------------------------------------------------------------------------------------------------------------------------------------------------------------------------------------------------------------------------------------------------------------------------------------------------------------------------------------------------------------------------------------------|
|        |                    | miR-576-3p, miR-218-5p, miR-22-5p, miR-374a-3p, miR-2285t, miR-628-3p, miR-9-5p, novel_101, miR-1a-1-5p, miR-3059-5p, miR-2447, miR-9-3p, novel_27, miR-326-3p, miR-362-5p, miR-877-3p, miR-211, miR-378b, miR-140-5p, miR-9-3p, miR-335-3p, miR-493-5p, miR-299b-5p, miR-96-5p, miR-211-5p, miR-329-5p, miR-489, miR-3082-5p, miR-378g, miR-29b-1-5p, miR-326, miR-224-5p, miR-487b-5p, miR-378a-5p, miR-483-3p, miR-744-3p, miR-23a-3p, miR-493-5p, miR-2330-5p, miR-345-5p, miR-2310, miR-758-3p, miR-503-3p, miR-758-3p, miR-873a-5p, miR-16-2-3p, miR-450b-5p, miR-3432b, miR-299a-5p, miR-26b-3p, miR-500-5p, miR-134-3p, miR-29b-2-5p, miR-338-5p, miR-3604, miR-320e, miR-30a-3p, miR-19b-1-5p, miR-6740-5p, miR-30e-3p, miR-1-5p, miR-204-5p, miR-129-5p, miR-487b-5p, miR-3074-2-3p, miR-6128, miR-1271, miR-3184-3p, miR-145a-3p, miR-539-5p, miR-6134, miR-122-5p, miR-1197-3p, miR-224-5p, miR-500b-5p, miR-142a-5p, miR-23b, miR-362-5p, miR-299, novel_99, miR-1827, miR-1814c, miR-1248, miR-625-5p, miR-345-5p, miR-345-5p, miR-1271, miR-532-5p, miR-2285aa, miR-140-5p, miR-204-3p, novel_25, miR-223-5p, miR-331-5p, miR-6516, miR-618, miR-543-5p, miR-127-5p, miR-760-3p, miR-29b-2-5p, miR-30a-3p, miR-195a-3p, miR-329a-5p, miR-200a, miR-130a-5p, miR-376a-5p, miR-29b-1-5p, miR-330-5p, miR-1290, miR-1246, miR-361-5p, miR-218-1-3p, miR-142-3p, miR-212-5p, miR-30d-3p, miR-23c, miR-483-3p, miR-340-5p, miR-6516-5p, miR-23b-3p, miR-9-5p |
| TRDN   | ENSOARGO( triadin  |                                                                                                                                                                                                                                                                                                                                                                                                                                                                                                                                                                                                                                                                                                                                                                                                                                                                                                                                                                                                                                                                                                                                                                                                                                                                                                                                                                                                                                                                        |
|        |                    | miR-17-3p, miR-25-5p, miR-1291, miR-17-3p, miR-17-3p, novel_4, miR-2331-3p, miR-134-3p, miR-378g, miR-767, miR-1827, miR-1814c, miR-378f, miR-3074-5p, miR-378a-3p, miR-1271, miR-6130, miR-34b, miR-29a-3p, miR-378g, miR-34c-5p, miR-378e, miR-29b-3p, miR-34c, miR-767-5p, miR-29a, miR-4492, miR-3074-5p, miR-4510, miR-378c, miR-29c-3p, miR-1260b, miR-2428, miR-449a, miR-378c, miR-378b, miR-378i, miR-378a-3p, miR-1197-5p, miR-29d-3p, miR-1260b, miR-1388-5p, miR-29b, miR-378c, miR-34a-5p, miR-148a-5p, miR-378h, miR-134-3p, miR-148b-5p, miR-1260a, novel_51, miR-422a, miR-760-3p, miR-34b-5p, miR-30b-3p, miR-654-3p, miR-378d, miR-148b-5p, miR-503-3p, miR-2310                                                                                                                                                                                                                                                                                                                                                                                                                                                                                                                                                                                                                                                                                                                                                                                     |
| CDYL2  | ENSOARGO( chromodo |                                                                                                                                                                                                                                                                                                                                                                                                                                                                                                                                                                                                                                                                                                                                                                                                                                                                                                                                                                                                                                                                                                                                                                                                                                                                                                                                                                                                                                                                        |
|        |                    | miR-6395, miR-544-5p, miR-1291, miR-96-5p, miR-145a-5p, miR-218-2-3p, miR-221, miR-328-3p, miR-221-3p, miR-1271-5p, miR-582-5p, miR-532-5p, miR-145b, miR-216b-3p, miR-222, miR-1468, miR-1468-5p, miR-197-5p, miR-133a-5p, miR-222-3p, miR-1271                                                                                                                                                                                                                                                                                                                                                                                                                                                                                                                                                                                                                                                                                                                                                                                                                                                                                                                                                                                                                                                                                                                                                                                                                       |
| CUEDC1 | ENSOARGO( CUE doma |                                                                                                                                                                                                                                                                                                                                                                                                                                                                                                                                                                                                                                                                                                                                                                                                                                                                                                                                                                                                                                                                                                                                                                                                                                                                                                                                                                                                                                                                        |
|        |                    |                                                                                                                                                                                                                                                                                                                                                                                                                                                                                                                                                                                                                                                                                                                                                                                                                                                                                                                                                                                                                                                                                                                                                                                                                                                                                                                                                                                                                                                                        |
| CLVS2  | ENSOARGO( clavesin |                                                                                                                                                                                                                                                                                                                                                                                                                                                                                                                                                                                                                                                                                                                                                                                                                                                                                                                                                                                                                                                                                                                                                                                                                                                                                                                                                                                                                                                                        |

miR-361-5p, miR-148a-5p, miR-133a-3p, miR-218-1-3p, miR-5703, miR-1197-5p, miR-140-3p, miR-1193, miR-2904, miR-362-3p, miR-199a-3p, miR-532-3p, miR-23c, miR-487a-3p, miR-23b-3p, miR-7859, miR-485-3p, miR-212-5p, miR-548e-3p, miR-299-3p, miR-21-3p, miR-185-3p, miR-345-3p, miR-500a-5p, miR-324-3p, novel\_17, miR-618, miR-376c-3p, miR-181b-1-3p, miR-664b-3p, miR-421-5p, miR-345-3p, miR-2285w, novel\_99, miR-345-5p, let-7f-1-3p, novel\_25, miR-204-3p, miR-323-5p, miR-216b-5p, miR-139-5p, miR-6130, miR-544-3p, miR-376e-3p, miR-377-3p, miR-132-5p, miR-2284s, miR-499b-3p, miR-552-3p, miR-21-3p, miR-548o-3p, miR-140-5p, miR-545-3p, miR-708-5p, miR-208b-5p, miR-6516-3p, miR-338-5p, miR-664a-5p, miR-29b-2-5p, miR-30a-3p, miR-30e-3p, miR-206-3p, miR-6525, miR-3074-2-3p, miR-129-2-3p, miR-4510, miR-539-5p, miR-2284aa, miR-1839-5p, miR-101c, miR-544a, miR-362-3p, miR-1388-5p, miR-758-3p, miR-1a-3p, miR-143-5p, miR-2284r, miR-329-3p, miR-148b-5p, miR-455-3p, miR-539-5p, miR-153, miR-425-3p, miR-145b, miR-199b-3p, miR-105-1, novel\_78, miR-548w, novel\_4, miR-1343-3p, miR-153-3p, miR-3955-3p, miR-491-5p, miR-362-3p, miR-1306-5p, miR-199a-3p, miR-1b-5p, miR-758-3p, miR-8485, miR-33a-5p, miR-23a-3p, miR-101b-3p, miR-1983, novel\_94, miR-136-5p, miR-129b-5p, miR-203-3p, miR-378g, miR-499a-3p, miR-7977, miR-20a-3p, miR-10b, miR-664b, miR-139-5p, miR-2284q, miR-7134-3p, miR-2285t, miR-4726-5p, miR-3968, miR-1973, miR-181d-5p, miR-194b-5p, miR-2447, miR-2427, miR-1290, miR-345-3p, novel\_121, miR-129-1-3p, miR-214-5p, miR-2284z, miR-758-5p, miR-299a-3p, novel\_96, miR-1a-2-5p, miR-127-5p, miR-181b-5p, miR-450a-2-3p, miR-30f, miR-125a-3p, miR-664-3p, miR-2285b, miR-29a-5p, miR-376c-5p, miR-376b-5p, miR-2478, miR-28b, miR-148b-5p, miR-4286, miR-2403, miR-30a-3p, miR-1, miR-495-5p, miR-29b-2-5p, miR-2285-3p, miR-1248, miR-3074-1-3p, miR-376c-5p, miR-490-5p, miR-200a-3p, miR-129b-5p, miR-9-5p, miR-331-5p, miR-654-3p, miR-8095, miR-539-5p, miR-3074-5p, miR-3074-5p, miR-541-5p, miR-655-5p, miR-141-3p, miR-3074-2-3p, miR-9-5p, miR-432, miR-542-3p, miR-301b-5p, miR-383-5p, miR-432-5p, miR-216a-3p, miR-7641, miR-18b-5p, miR-181b-2-3p, miR-760-3p, miR-125a-5p, miR-21-3p, miR-125b, miR-432-3p, miR-181b-1-3p, miR-432-3p, miR-8485, miR-668-3p, miR-376b, miR-18a-5p, miR-671-5p, miR-18b, miR-129b-3p, miR-18a, miR-411b-3p, miR-204-3p, miR-677, miR-181b-3p, miR-574-5p, miR-2285aa, miR-2355-5p, miR-125a, miR-708-5p, miR-487a-5p, miR-28-5p, miR-125b-5p, miR-301a-5p, miR-3604, miR-323-3p, miR-122-5p, miR-2447, miR-374a-3p, miR-769-5p, miR-101-5p, miR-363-5p, miR-3064-5p, novel\_127, miR-4492, miR-3653-3p, miR-374a-3p, miR-4726-5p, miR-3085-3p, miR-769-5p, miR-3071-3p, miR-576-3p, miR-769, miR-185-5p, miR-2285aa, miR-874-3p, miR-18a-3p, miR-3064-5p, miR-877-3p, miR-18a-3p, miR-1434-3p

TDGF1 ENSOARGO(teratoca:3p, miR-143-5p, miR-2284r, miR-329-3p, miR-148b-5p, miR-455-3p, miR-539-5p, miR-153, miR-425-3p, miR-145b, miR-199b-3p, miR-105-1, novel\_78, miR-548w, novel\_4, miR-1343-3p, miR-153-3p, miR-3955-3p, miR-491-5p, miR-362-3p, miR-1306-5p, miR-199a-3p, miR-1b-5p, miR-758-3p, miR-8485, miR-33a-5p, miR-23a-3p, miR-101b-3p, miR-1983, novel\_94, miR-136-5p, miR-129b-5p, miR-203-3p, miR-378g, miR-499a-3p, miR-7977, miR-20a-3p, miR-10b, miR-664b, miR-139-5p, miR-2284q, miR-7134-3p, miR-2285t, miR-4726-5p, miR-3968, miR-1973, miR-181d-5p, miR-194b-5p, miR-2447, miR-2427, miR-1290, miR-345-3p, novel\_121, miR-129-1-3p, miR-214-5p, miR-2284z, miR-758-5p, miR-299a-3p, novel\_96, miR-1a-2-5p, miR-127-5p, miR-181b-5p, miR-450a-2-3p, miR-30f, miR-125a-3p, miR-664-3p, miR-2285b, miR-29a-5p, miR-376c-5p, miR-376b-5p, miR-2478, miR-28b, miR-148b-5p, miR-4286, miR-2403, miR-30a-3p, miR-1, miR-495-5p, miR-29b-2-5p, miR-2285-3p, miR-1248, miR-3074-1-3p, miR-376c-5p, miR-490-5p, miR-200a-3p, miR-129b-5p, miR-9-5p, miR-331-5p, miR-654-3p, miR-8095, miR-539-5p, miR-3074-5p, miR-3074-5p, miR-541-5p, miR-655-5p, miR-141-3p, miR-3074-2-3p, miR-9-5p

CCDC62 ENSOARGO(coiled-c, miR-432, miR-542-3p, miR-301b-5p, miR-383-5p, miR-432-5p, miR-216a-3p, miR-7641, miR-18b-5p, miR-181b-2-3p, miR-760-3p, miR-125a-5p, miR-21-3p, miR-125b, miR-432-3p, miR-181b-1-3p, miR-432-3p, miR-8485, miR-668-3p, miR-376b, miR-18a-5p, miR-671-5p, miR-18b, miR-129b-3p, miR-18a, miR-411b-3p, miR-204-3p, miR-677, miR-181b-3p, miR-574-5p, miR-2285aa, miR-2355-5p, miR-125a, miR-708-5p, miR-487a-5p, miR-28-5p, miR-125b-5p, miR-301a-5p, miR-3604, miR-323-3p, miR-122-5p, miR-2447, miR-374a-3p, miR-769-5p, miR-101-5p, miR-363-5p, miR-3064-5p, novel\_127, miR-4492, miR-3653-3p, miR-374a-3p, miR-4726-5p, miR-3085-3p, miR-769-5p, miR-3071-3p, miR-576-3p, miR-769, miR-185-5p, miR-2285aa, miR-874-3p, miR-18a-3p, miR-3064-5p, miR-877-3p, miR-18a-3p, miR-1434-3p

LYPD8 ENSOARGO(LY6/PLAU:5p, miR-18b, miR-129b-3p, miR-18a, miR-411b-3p, miR-204-3p, miR-677, miR-181b-3p, miR-574-5p, miR-2285aa, miR-2355-5p, miR-125a, miR-708-5p, miR-487a-5p, miR-28-5p, miR-125b-5p, miR-301a-5p, miR-3604, miR-323-3p, miR-122-5p, miR-2447, miR-374a-3p, miR-769-5p, miR-101-5p, miR-363-5p, miR-3064-5p, novel\_127, miR-4492, miR-3653-3p, miR-374a-3p, miR-4726-5p, miR-3085-3p, miR-769-5p, miR-3071-3p, miR-576-3p, miR-769, miR-185-5p, miR-2285aa, miR-874-3p, miR-18a-3p, miR-3064-5p, miR-877-3p, miR-18a-3p, miR-1434-3p

NSDHL ENSOARGO(NAD(P) d:5p, miR-3085-3p, miR-769-5p, miR-3071-3p, miR-576-3p, miR-769, miR-185-5p, miR-2285aa, miR-874-3p, miR-18a-3p, miR-3064-5p, miR-877-3p, miR-18a-3p, miR-1434-3p

miR-130b-5p, miR-708-5p, miR-4492, miR-208b-5p, miR-664a, miR-17-3p, miR-451a, miR-665, miR-324-3p, miR-30a-3p, miR-30e-3p, miR-338-3p, miR-181c-5p, miR-3184-5p, miR-224-5p, miR-145a-3p, miR-3074-5p, miR-433-5p, miR-539-5p, miR-378c, novel\_99, miR-625-5p, miR-339b, miR-2312, miR-2285c, novel\_32, miR-22-3p, miR-204-3p, miR-6516, miR-192-5p, miR-3065-3p, miR-21-3p, miR-30c-1-3p, miR-504-5p, miR-378a-3p, miR-34b-5p, miR-466i-5p, miR-125b, miR-185-3p, miR-422a, miR-216a-5p, miR-500a-5p, miR-324-3p, miR-196a-3p, miR-2424, miR-486-3p, miR-125b-2-3p, miR-376a-5p, miR-345-3p, miR-2285w, miR-503-5p, miR-183-5p, miR-10a-3p, miR-378d, miR-34a-5p, miR-133a-3p, miR-378a-3p, miR-1197-5p, miR-376a-5p, miR-215-5p, miR-378i, miR-2284h-5p, miR-30d-3p, miR-548e-3p, miR-18a-3p, miR-2285t, miR-3968, miR-301a-5p, miR-2285y, miR-2440, miR-2285n, miR-423-5p, miR-8095, miR-362-5p, miR-361-3p, miR-452-5p, miR-181d-5p, miR-2285f, miR-541-3p, miR-2447, novel\_94, miR-136-5p, miR-504, miR-129b-5p, miR-454-5p, miR-1185-2-3p, miR-203-3p, miR-378e, miR-7977, miR-499b-5p, miR-541-5p, miR-452-3p, miR-25-5p, miR-1185-5p, miR-5126, miR-1306-5p, miR-378d, miR-30c-1-3p, miR-744-3p, miR-382-3p, miR-1388-3p, miR-3120-5p, miR-101a-5p, miR-378c, miR-30b-3p, miR-3962, miR-412-3p, miR-301b-5p, miR-541, miR-378b, miR-2285e, miR-1185-3p, miR-500-5p, miR-147a, miR-105-1, miR-2300a-5p, miR-548w, miR-28-5p, miR-486b-3p, miR-409-3p, miR-331-3p, miR-125b-5p, miR-135a-1-3p, miR-410-5p, miR-29b-3p, miR-2433, miR-10b-3p, miR-378c, miR-2903, miR-500b-5p, miR-193a-5p, miR-1306-5p, novel\_42, miR-1248, miR-485-5p, miR-7144-5p, miR-2318, miR-876-3p, miR-10b-3p, miR-10a-3p, miR-3154, miR-362-5p, miR-488-3p, miR-324-5p, miR-34c-5p, miR-300-3p, miR-374c-3p, miR-215-5p, miR-125a, miR-370-3p, novel\_127, miR-127-5p, miR-181b-5p, miR-2808, miR-17-3p, miR-371b-3p, miR-199a-5p, miR-199b-5p, miR-3059-5p, miR-487a, miR-3607-3p, miR-17-3p, miR-17-3p, miR-17-3p, miR-199b-5p, miR-30d, miR-154-3p, miR-2285n, novel\_82, miR-199a-5p, miR-2285ad, miR-487a-3p, miR-154a-3p, miR-2284ab, miR-154b-3p, miR-101a-5p, miR-30e-5p, miR-2366, miR-199b-5p, miR-30a-5p, miR-30d-5p, miR-130a-3p, miR-122-3p, miR-409b, novel\_121, miR-214-5p, miR-9788-3p, miR-185-5p, miR-3431, miR-3071-5p, miR-218-2-3p, miR-10b, miR-2284r, miR-3120-5p, miR-10a-5p, miR-345-3p, miR-143-3p, miR-3065-3p, miR-181b-1-3p, miR-2957, miR-1306-5p, miR-664-3p, miR-130b-3p, miR-450a-2-3p, miR-10a-5p, miR-211-5p, miR-3065-3p, miR-2319b, miR-452-3p, miR-664b, miR-181b-3p, miR-677, novel\_69, miR-10a, miR-301a-3p, miR-3065-5p, miR-3154, miR-1306, novel\_99, miR-1983, miR-19a-3p, miR-412-3p, miR-329b, miR-665-5p, miR-193a-5p, miR-212-3p, miR-3059-5p, miR-301b-3p, miR-6134, miR-1197-3p, miR-10b-5p, miR-211, miR-320e, miR-664a-5p, miR-100-3p, miR-6740-5p, miR-204-5p, miR-454-3p, novel\_1

ORAI3 ENSOARGO(ORAI cal 3p

PRPF40A ENSOARGO(PRPF40 pr

TRIB1 ENSOARGO(tribbles

miR-29b-1-5p, miR-181b-1-3p, miR-377-5p, miR-130a-5p, miR-216c-5p, miR-2285w, miR-195a-3p, miR-345-3p, miR-320d, miR-760-3p, miR-3653-3p, miR-2484, miR-21-3p, miR-210-5p, miR-208b-3p, miR-618, miR-324-3p, miR-125b, miR-345-3p, miR-383-5p, miR-7859, miR-148b-3p, miR-340-5p, miR-2284h-5p, novel\_83, miR-1247-5p, miR-548e-3p, miR-18a-3p, miR-505-3p, miR-4429, miR-33b-3p, miR-16-1-3p, miR-361-5p, miR-215-5p, miR-362-3p, miR-1246, miR-2366, miR-1197-5p, miR-217-5p, miR-1434-5p, miR-140-3p, miR-5703, miR-6525, miR-142a-5p, miR-224-5p, miR-4510, miR-129-2-3p, miR-3958-5p, miR-425-5p, miR-2330-3p, miR-17-3p, miR-129-5p, miR-487a-5p, miR-130b-5p, miR-324-3p, miR-664a-5p, miR-665, miR-192-5p, miR-323-5p, miR-6130, miR-216b-5p, novel\_32, novel\_25, miR-30c-1-3p, miR-140-5p, miR-504-5p, miR-548o-3p, miR-370-5p, miR-532-5p, miR-552-3p, let-7g-3p, miR-18a-5p, miR-339b, miR-1827, miR-186-5p, miR-30c-1-3p, miR-8485, miR-1b-5p, miR-1839-3p, miR-494-3p, miR-382-3p, miR-652-5p, miR-491-5p, miR-3085-3p, miR-3955-3p, miR-320b, novel\_103, miR-362-3p, miR-29b-1-5p, miR-142-5p, miR-9788-3p, miR-455-3p, miR-216a-3p, novel\_4, miR-181b-2-3p, miR-145b, miR-362-3p, miR-101a-5p, miR-16-2-3p, miR-329-3p, miR-301b-5p, miR-143-5p, novel\_60, miR-3956-3p, miR-452-5p, miR-194b-5p, miR-9-5p, miR-490-5p, miR-374a-3p, miR-218-5p, miR-301a-5p, miR-2483-3p, miR-489, miR-3064-5p, miR-541-5p, miR-504, miR-668-5p, miR-335-3p, miR-493-5p, miR-140-5p, miR-129b-5p, miR-28b, miR-380-5p, miR-2285b, miR-1271-3p, miR-3529-3p, miR-3064-5p, miR-181a-2-3p, miR-17-3p, miR-450a-2-3p, miR-543-5p, miR-152-3p, novel\_96, novel\_127, miR-30c-2-3p, miR-217, miR-339a, miR-9-5p, miR-302a-5p, miR-483-3p, miR-758-5p, miR-134-5p, miR-545-5p, miR-129-1-3p, miR-6517, novel\_79, miR-18b-5p, miR-582-3p, miR-345-3p, miR-134, miR-1342-5p, miR-2427, miR-374a-



miR-1298-5p, miR-299a-5p, miR-101c, miR-1343-3p, miR-548w, miR-27a-3p, miR-425-3p, miR-148b-5p, miR-9788-3p, miR-5126, miR-326, miR-16b, miR-25-5p, miR-3085-3p, miR-103a-2-5p, miR-424-5p, miR-33a-5p, miR-30c-1-3p, miR-381-3p, miR-299b-5p, miR-544-5p, miR-335-3p, miR-2319b, miR-20a-3p, miR-3064-5p, miR-211-5p, miR-541-5p, miR-3082-5p, miR-499a-3p, miR-4443, miR-27a-3p, miR-107-5p, miR-335, miR-2284q, miR-7134-3p, miR-2284j, miR-194b-5p, miR-9-5p, miR-452-5p, miR-877-3p, miR-8095, miR-2408, miR-1197-5p, miR-3960, miR-3600, miR-15a-5p, miR-200b, miR-532-3p, miR-26a-5p, miR-500a-5p, miR-2284m, miR-216c-5p, miR-125b-2-3p, miR-664b-3p, miR-2411, miR-129b-3p, novel\_99, miR-186-5p, miR-30c-1-3p, miR-21-3p, miR-2284s, miR-499b-3p, miR-15b-5p, miR-17-3p, miR-424-5p, miR-590-3p, miR-1843b-5p, miR-223-3p, miR-873a-5p, miR-374b-3p, miR-3071-5p, miR-194-5p, miR-16b, miR-188-5p, miR-27b-3p, miR-2284x, miR-497-5p, miR-26b-3p, miR-185-5p, miR-194a, miR-197-5p, miR-378a-5p, miR-124-5p, miR-2284l, miR-2285r, miR-3591-3p, miR-150-5p, miR-195a-5p, miR-376a-2-5p, miR-329-5p, miR-26b-5p, miR-670-3p, miR-677, miR-15a, miR-1247-3p, miR-16a, novel\_1, miR-22-5p, miR-656-5p, miR-335-5p, novel\_120, novel\_101, miR-17-3p, miR-211, novel\_27, miR-326-3p, miR-134, miR-330-5p, miR-300, miR-200b-3p, miR-429-3p, miR-2285ad, miR-376a-5p, miR-1224-5p, miR-2411-5p, miR-322-5p, miR-9-5p, miR-134-5p, miR-582-3p, miR-200c, miR-125a-3p, miR-2285af, miR-205-5p, miR-30c-2-3p, miR-200c-3p, miR-17-3p, miR-200a-3p, miR-181a-2-3p, miR-2403, miR-2385-3p, miR-3064-5p, miR-148b-5p, miR-2285b, miR-29a-5p, novel\_39, miR-381-3p, miR-3154, miR-200a-5p, miR-671-5p, novel\_48, miR-23a-5p, miR-615-5p, miR-141-3p, miR-542-5p, miR-300-3p, miR-5100, miR-2284k, miR-2433, miR-134-5p, miR-204-5p, miR-410-3p, miR-31-3p, miR-16-5p

miR-301b-3p, miR-335-5p, miR-758-5p, miR-193b-3p, miR-6123, miR-28c, miR-1307-5p, miR-374c-3p, miR-299b-3p, miR-320c, novel\_68, miR-146b-5p, miR-3141, miR-376b-5p, miR-216a-3p, miR-3591-3p, miR-3065-5p, miR-6240, miR-668-3p, miR-193a-3p, miR-146a, miR-2285v, miR-3141, miR-3535, miR-194-3p, miR-149-5p, novel\_116, miR-340-3p, miR-3955-5p, miR-27b-3p, miR-2113, novel\_23, miR-22-3p, miR-1260b, miR-1197-3p, miR-2433, miR-125b-5p, miR-133c, miR-503-3p, miR-125a, miR-1271, miR-2285aa, miR-2355-5p, miR-2474, miR-424-3p, miR-301, miR-376c-5p, novel\_39, miR-3064-5p, novel\_96, miR-200a-3p, miR-8117, miR-9-5p, miR-129-1-3p, miR-6517, miR-299a-3p, miR-2285ad, miR-18b-5p, miR-330-5p, miR-1343-5p, novel\_111, miR-361-3p, miR-877-3p, miR-423-5p, miR-2447, miR-9-5p, miR-1843a-3p, miR-301a-5p, miR-652-3p, miR-203-3p, miR-139-5p, miR-136-5p, miR-8485, miR-124a, miR-574-3p, miR-130b-3p, miR-491-5p, miR-146b, miR-182-5p, miR-505, miR-29b-1-5p, novel\_19, miR-455-3p, miR-199b-3p, miR-1343-3p, novel\_78, miR-330-3p, miR-145b, miR-301b-5p, miR-541, miR-1298-5p, miR-2284r, miR-6525, miR-3184-5p, miR-129-2-3p, novel\_74, miR-454-3p, miR-4492, miR-665, miR-2284s, miR-301a-3p, miR-151b, miR-2331-3p, miR-552-3p, miR-216b-3p, miR-1827, miR-543-3p, miR-1895, miR-2285c, miR-299, miR-433-3p, miR-129b-3p, miR-486-3p, miR-2285w, miR-345-3p, miR-210-5p, miR-3601, miR-7859, miR-2284h-5p, miR-212-5p, miR-380-5p, miR-142-3p, miR-34a-5p, miR-2366, novel\_27, miR-449a, miR-326-3p, miR-342-3p, miR-1193, miR-128-1-5p, miR-199c, miR-6529b, miR-34c, miR-670-3p, miR-34b, miR-2404, miR-378b, miR-363, miR-320b, miR-2387, miR-18b, miR-378b, miR-363-5p, miR-2483-5p, miR-2285l, miR-452-5p, miR-125a-5p, miR-1343-5p, miR-330-3p, miR-185-5p, miR-2285g, miR-544b, miR-187-3p, miR-130a-3p, miR-1260b, miR-138, miR-2889, miR-744-5p, miR-1285, miR-

miR-19b-3p, miR-148a-5p, miR-1434-5p, miR-23b-3p, miR-23c, miR-15a-5p, novel\_83, miR-2284h-5p, miR-616-3p, miR-106a, miR-3600, miR-505-3p, miR-106a, miR-760-3p, miR-1277-5p, miR-21-3p, miR-299-3p, novel\_17, miR-500a-5p, miR-324-3p, miR-181b-1-3p, miR-380-3p, miR-143-3p, miR-2285w, miR-20a, miR-345-3p, miR-339b, miR-625-5p, miR-1827, miR-21a-3p, miR-598-3p, miR-6516, miR-27a-5p, novel\_32, miR-204-3p, novel\_25, miR-155-5p, miR-877-5p, miR-15b-5p, miR-2331-3p, miR-140-5p, miR-30c-1-3p, miR-32-3p, miR-216b-3p, miR-17-3p, miR-155-5p, miR-424-5p, miR-129-5p, miR-151-3p, miR-665, miR-338-5p, miR-29b-2-5p, miR-338-3p, miR-3074-5p, miR-214, miR-3074-2-3p, miR-450b-5p, miR-541, miR-143-5p, miR-30b-3p, miR-9788-3p, miR-148b-5p, miR-221-3p, miR-1185-3p, miR-126a-5p, miR-330-3p, miR-151a-3p, miR-5010-3p, miR-145b, miR-181b-2-3p, miR-27a-3p, miR-3085-3p, miR-199b-5p, miR-103a-2-3p, miR-214-3p, miR-342, novel\_115, miR-326, miR-1306-5p, miR-106b-5p, miR-16b, miR-30c-1-3p, miR-8485, miR-2310, miR-424-5p, miR-2330-5p, miR-106a-5p, miR-101b-3p, miR-23a-3p, miR-299b-5p, miR-136-5p, miR-493-5p, miR-544-5p, miR-140-5p, miR-199b-5p, miR-221, miR-381-3p, miR-489, miR-203-3p, miR-1185-2-3p, miR-27a-3p, miR-4792, miR-3064-5p, miR-452-3p, miR-541-5p, miR-374b-5p, miR-211-5p, miR-7977, miR-3968, miR-2285y, miR-107-5p, miR-8095, novel\_60, miR-32-3p, miR-2447, miR-3059-5p, miR-541-3p, miR-3956-3p, miR-212-3p, miR-219a-5p, miR-194b-5p, miR-452-5p, miR-300, miR-155-5p, miR-2427, miR-330-5p, miR-322-5p, miR-6516-5p, novel\_121, miR-299a-3p, miR-222, miR-2285ad, novel\_79, miR-17-3p, miR-127-5p, miR-6536, miR-543-5p, miR-205-5p, miR-3071-3p, miR-30f, miR-30c-2-3p, miR-339a, miR-148b-5p, miR-199a-5p, miR-3064-5p, miR-29b-2-5p, miR-876-3p, miR-2318, miR-329b, miR-23a-5p, miR-20b-5p, miR-1248, miR-1814c, miR-381-3p, miR-92-

miR-34b-3p, miR-183-5p, miR-486-3p, miR-376c-3p, miR-185-3p, miR-324-3p, miR-299-3p, miR-21-3p, miR-34b-5p, miR-760-3p, miR-2284m, miR-1b-3p, miR-18a-3p, miR-328-3p, miR-200b, miR-148b-3p, miR-5703, miR-2904, miR-2300b-3p, novel\_133, miR-34a-5p, miR-148a-5p, miR-2284u, miR-19b-3p, miR-214, miR-129-2-3p, miR-6134, miR-206-3p, miR-6525, miR-29b-2-5p, miR-665, miR-324-3p, miR-2285j, miR-874-5p, miR-4492, miR-454-3p, miR-129-5p, miR-664a, miR-21-3p, miR-504-5p, miR-140-5p, miR-2331-3p, miR-204-3p, miR-22-3p, miR-301a-3p, miR-376e-3p, miR-129b-3p, miR-345-5p, miR-18a-5p, miR-339b, let-7g-3p, miR-2284b, miR-2330-5p, miR-574-3p, miR-326, miR-342, miR-214-3p, miR-130b-3p, miR-25-5p, novel\_124, miR-181b-2-3p, novel\_78, novel\_4, miR-409b, miR-2300a-5p, miR-2459, miR-9788-3p, miR-148b-5p, miR-1298-3p, miR-30b-3p, miR-1a-3p, miR-484, miR-2284r, miR-3120-5p, miR-2284aa, miR-2426, miR-1388-5p, miR-2284j, miR-9-5p, miR-885-5p, miR-2447, miR-154a, miR-361-3p, miR-1973, miR-2440, miR-211-5p, miR-126b-5p, miR-7689-3p, miR-499b-5p, miR-24-1-5p, miR-2284g, miR-203-3p, miR-3082-5p, miR-3596, miR-129b-5p, miR-361-3p, novel\_94, miR-504, miR-4286, miR-29b-2-5p, miR-1, miR-1271-3p, miR-2284a, miR-2284y, miR-24-2-5p, miR-148b-5p, miR-339a, miR-200c, miR-1260a, miR-2285af, miR-200a-3p, novel\_127, miR-152-3p, miR-200c-3p, miR-18b-5p, novel\_79, miR-429-3p, miR-299a-3p, miR-129-1-3p, miR-2284z, miR-9-5p, miR-24-2-5p, miR-505-5p, miR-330-5p, miR-128-3p, miR-200b-3p, miR-6128, miR-2284v, miR-1260b, miR-2284k, miR-486b-3p, miR-204-5p, miR-141-3p, miR-615-5p, miR-2355-5p, miR-2285aa, miR-874-3p, miR-2284n, miR-376c-3p, miR-133c, miR-34c-5p, miR-18a, miR-488-3p, miR-345-5p, miR-2474, miR-876-3p, miR-668-3p, miR-345-5p, miR-432-3p, miR-378a-5p, miR-339-5p, miR-130a-3p, miR-122-3p, miR-31-5p, miR-

NMES

ENSOARGOC NME/NM23

miR-485-5p, miR-331-5p, miR-2448-3p, miR-23b, miR-331-5p, miR-3965, miR-125a, miR-1271, miR-331-5p, miR-374b-3p, miR-34c-3p, miR-125b-5p, miR-374a-3p, miR-378c, miR-1306-5p, miR-200b-3p, miR-378h, miR-2285ad, miR-429-3p, miR-200c-3p, miR-181b-5p, novel\_96, miR-664-3p, miR-1, miR-30a-3p, miR-378f, miR-21c, miR-669, miR-677, miR-181b-3p, miR-206, miR-656-5p, miR-203b-5p, miR-4324, miR-33a-3p, miR-323c, miR-374c-5p, miR-2285m, miR-335-5p, miR-21-5p, miR-19b-2-5p, miR-542-3p, miR-181a-5p, miR-197-3p, novel\_23, miR-145a-5p, miR-6238, miR-31-5p, miR-660, miR-125a-5p, miR-582, miR-377-3p, miR-296-3p, miR-2285v, miR-654-3p, miR-296-3p, miR-493-5p, miR-101-5p, let-7f-2-3p, let-7f-2-3p, novel\_99, miR-3613-5p, let-7f-1-3p, miR-377-3p, miR-378a-3p, miR-140-5p, miR-2331-3p, miR-660-5p, let-7b-3p, miR-30e-3p, miR-30a-3p, miR-19b-1-5p, miR-206-3p, miR-98-3p, miR-181c-5p, miR-378c, miR-539-5p, novel\_73, miR-33b-3p, miR-378i, miR-98-3p, miR-378a-3p, miR-23b-3p, miR-200b, miR-23c, miR-2284h-5p, miR-30d-3p, miR-466i-5p, miR-92a-1-5p, miR-422a, miR-125b, miR-125b-2-3p, miR-181b-1-3p, miR-216c-5p, miR-2285w, miR-345-3p, miR-136-5p, miR-493-5p, miR-378e, miR-1185-2-3p, miR-4443, miR-664b, miR-2319b, miR-335, miR-218-5p, miR-107-5p, novel\_111, miR-3059-5p, miR-885-5p, miR-181d-5p, miR-1388-5p, miR-378c, miR-101a-5p, miR-101c, miR-484, miR-378b, miR-6529a, miR-1a-3p, miR-7857, miR-147a, miR-1185-3p, miR-145b, miR-181b-2-3p, miR-491-5p, miR-3955-3p, miR-103a-2-5p, miR-378d, miR-101b-3p, miR-494-3p, miR-23a-3p, miR-33a-5p

miR-3959-3p, miR-24-3p, novel\_27, miR-22-5p, miR-656-5p, miR-203b-5p, miR-4324, miR-502-5p, miR-15a, miR-16a, miR-323a-5p, miR-669, miR-677, miR-6535, miR-181b-3p, miR-216b-3p, miR-410-5p, miR-379-5p, miR-195a-5p, miR-18a-3p, miR-376b-3p, miR-296-3p, miR-130b-5p, miR-363-5p, let-7f-2-3p, let-7f-2-3p, miR-1343-5p, miR-296-3p, miR-197-5p, miR-105-5p, miR-432-5p, miR-3431, miR-149-5p, miR-2355-3p, miR-544b, miR-187-3p, miR-339-5p, miR-26b-3p, miR-16b, miR-369-5p, miR-497-5p, miR-2284x, miR-432, miR-1843b-5p, miR-181a-5p, miR-1197-3p, miR-145-3p, miR-16-5p, miR-486b-3p, miR-99b-3p, miR-331-3p, miR-3969, miR-365a-3p, miR-133c, miR-99a-3p, miR-2355-5p, miR-876-3p, miR-7144-5p, miR-1814c, miR-1248, miR-488-3p, miR-3065-3p, miR-2385-3p, miR-181a-2-3p, miR-191-3p, miR-181b-5p, novel\_127, miR-2285af, miR-376b-3p, miR-125a-3p, miR-339a, miR-322-5p, miR-9-5p, miR-582-3p, miR-2284z, miR-2285ad, novel\_79, miR-885-3p, miR-105-2, miR-3578, miR-1290, miR-1343-5p, miR-30a-5p, miR-361-3p, novel\_111, miR-3059-5p, miR-4454, miR-541-3p, miR-181d-5p, miR-9-5p, miR-3968, miR-2284q, miR-2285n, miR-2440, miR-371a-5p, miR-2285y, miR-1973, miR-301a-5p, miR-1185-2-3p, miR-376d, miR-139-5p, miR-20a-3p, miR-7977, miR-126b-5p, miR-376a-3p, miR-877-3p, miR-140-5p, miR-378j, miR-2310, miR-1388-3p, miR-101b-3p, miR-424-5p, miR-652-5p, miR-214-3p, miR-2957, miR-16b, miR-376b-3p, miR-455-3p, miR-216a-3p, miR-1185-3p, miR-105-1, miR-181b-2-3p, miR-101a-5p, miR-2426, miR-544a, miR-2284aa, miR-101c, miR-541, miR-301b-5p, miR-143-5p, miR-6525, miR-122-5p, miR-181c-5p, miR-6134, miR-145a-3p, miR-3958-5p, miR-214, novel\_74, miR-424-5p, miR-130b-5p, miR-369-5p, miR-664a-5p, miR-132-5p, miR-544-3p, miR-323-5p, miR-216b-5p, miR-139-5p, miR-15b-5p, miR-140-5p, miR-3065-3p, novel\_107, miR-2284h, miR-885-3p, miR-200a, miR-30d-5p, miR-664h-3p, miR-181b, miR-140-3p, miR-1197-5p, miR-193b-5p, miR-2284u, miR-148a-5p, miR-16-1-3p, miR-33b-3p, miR-411-3p, miR-2285ad, miR-129-1-3p, miR-545-5p, miR-15a-5p, miR-322-5p, miR-9-5p, novel\_17, miR-30b-3p, miR-29b-2-5p, miR-2284a, miR-1271-3p, novel\_39, miR-2284y, miR-130a-5p, miR-29b-1-5p, miR-411, miR-129b-3p, miR-671-5p, miR-1248, novel\_48, miR-345-5p, miR-345-5p, miR-767, miR-1271, miR-660-5p, miR-140-5p, miR-15b-5p, miR-223-5p, miR-3969, miR-665, miR-29b-2-5p, miR-130b-5p, miR-424-5p, miR-874-5p, miR-129-5p, miR-767-5p, miR-144-5p, miR-16-5p, miR-129-2-3p, novel\_23, miR-432, miR-16-2-3p, miR-497-5p, miR-101a-5p, miR-16-1-3p, miR-16b, miR-2284ab, miR-1343-3p, miR-216a-3p, miR-148b-5p, miR-455-3p, miR-3431, miR-432-5p, miR-16b, miR-2957, miR-29b-1-5p, miR-660, miR-376b, miR-2284b, miR-363-5p, miR-382-3p, miR-424-5p, miR-130b-5p, miR-1b-5p, miR-345-5p, miR-432-3p, miR-432-3p, miR-140-5p, miR-361-3p, miR-195a-5p, miR-335-3p, miR-9851-3p, miR-7689-3p, miR-2285u, miR-452-3p, miR-2284g, miR-4443, miR-144-5p, miR-7857-3p, miR-16a, miR-2285y, miR-382-3p, miR-2285n, miR-15a, miR-147-5p, miR-22-5p, miR-335, miR-379-3p, miR-9-5p, miR-335-5p, miR-3956-3p, miR-212-3p, miR-3059-5p, novel\_60, miR-2284w

|       |                    |                                                                                                                                                                                                                                                                                                                                                                                                                                                                                                                                                                                                                                                                                                                                                                                                                                                                                                                                                                                                                                                                                                                                                                                                                                                                                                                                                                                                                                                                                                                                                                                                                                                                                                                                                                                                                                                                                                                                                                                                                                                                                                                                 |
|-------|--------------------|---------------------------------------------------------------------------------------------------------------------------------------------------------------------------------------------------------------------------------------------------------------------------------------------------------------------------------------------------------------------------------------------------------------------------------------------------------------------------------------------------------------------------------------------------------------------------------------------------------------------------------------------------------------------------------------------------------------------------------------------------------------------------------------------------------------------------------------------------------------------------------------------------------------------------------------------------------------------------------------------------------------------------------------------------------------------------------------------------------------------------------------------------------------------------------------------------------------------------------------------------------------------------------------------------------------------------------------------------------------------------------------------------------------------------------------------------------------------------------------------------------------------------------------------------------------------------------------------------------------------------------------------------------------------------------------------------------------------------------------------------------------------------------------------------------------------------------------------------------------------------------------------------------------------------------------------------------------------------------------------------------------------------------------------------------------------------------------------------------------------------------|
| RGS19 | ENSOARGO( regulato | miR-488-3p, miR-500a-3p, miR-188-3p, miR-504, miR-504-5p, miR-370-3p, miR-141-3p, miR-1298-3p, novel_69, miR-669, novel_17, miR-331-3p, miR-491-5p, miR-127-5p, miR-500, miR-200a-3p, novel_96, miR-214-3p, miR-214, miR-6525, miR-1271-3p<br>miR-9851-3p, miR-18b, miR-2387, miR-18a-3p, miR-34b, miR-670-3p, miR-29a-3p, miR-146b-3p, miR-10a-5p, miR-320b, novel_1, miR-502b, miR-22-5p, miR-6402, miR-6529b, let-7i, miR-34c, miR-211, miR-2428, miR-449a, miR-2285x, novel_101, miR-3957-3p, miR-219a-1-3p, miR-1260b, miR-138, miR-29b, miR-455-5p, miR-181a-5p, miR-873a-5p, let-7g-5p, miR-2285g, miR-432-5p, miR-1343-5p, miR-224-5p, miR-455-5p, miR-654-3p, miR-345-5p, miR-296-3p, miR-363-5p, miR-10b-3p, miR-485-5p, miR-23a-5p, miR-362-5p, miR-18a, miR-34c-5p, miR-199a-5p, miR-215-5p, miR-370-3p, miR-138-5p, miR-204-5p, miR-486b-3p, miR-28-5p, miR-2332, miR-29b-3p, miR-331-3p, miR-500b-5p, miR-378c, miR-145-3p, miR-1306-5p, miR-133a-3p, miR-6128, let-7d, miR-10a-5p, miR-105-2, miR-501-3p, miR-29d-3p, miR-6516-5p, miR-378h, miR-2411-5p, miR-214-5p, miR-545-5p, miR-7641, miR-181b-5p, miR-6119-5p, miR-2285af, miR-1260a, let-7c-5p, miR-217, miR-339a, miR-30c-2-3p, miR-28b, miR-1271-3p, miR-3065-3p, miR-199a-5p, miR-4286, miR-30a-3p, miR-1, miR-29b-2-5p, novel_94, miR-199b-5p, miR-361-3p, miR-489, miR-3082-5p, miR-378e, miR-7857-3p, miR-27a-3p, let-7d-5p, miR-452-3p, miR-3064-5p, miR-7977, miR-335, miR-4726-5p, miR-2284q, miR-362-5p, miR-502-3p, novel_60, miR-181d-5p, miR-378c, miR-2284aa, miR-10b, miR-143-5p, miR-6529a, miR-378b, miR-296-5p, miR-7857, miR-2285e, miR-500-5p, miR-105-1, miR-2300a-5p, miR-27a-3p, miR-222-5p, miR-5010-3p, miR-3085-3p, let-7e, miR-5126, miR-30c-1-3p, miR-4532, miR-494-3p, miR-2330-5p, let-7a-5p, let-7c-3p, miR-18a-5p, miR-133b-3p, miR-6130, miR-192-5p, miR-6516, miR-27a-5p, novel_32, miR-204-3p, miR-378a-3p, miR-140-5p, miR-221-5p, miR-3065-3p, miR-664a, miR-450b-3p, miR-708-5p, miR-29b-2-5p, miR-324-3p, miR-206-3p, miR-10b-5p, miR-338-3p, miR-6134, let-7b-5p, miR-4510, miR-530-5p, miR-378c, miR-378d, miR- |
| SCN2B | ENSOARGO( sodium c |                                                                                                                                                                                                                                                                                                                                                                                                                                                                                                                                                                                                                                                                                                                                                                                                                                                                                                                                                                                                                                                                                                                                                                                                                                                                                                                                                                                                                                                                                                                                                                                                                                                                                                                                                                                                                                                                                                                                                                                                                                                                                                                                 |

novel\_27, miR-326-3p, miR-495-3p, miR-1193, miR-6119-3p, miR-656-5p, miR-20a-5p, miR-3613, miR-502-5p, miR-4324, miR-33a-3p, miR-144-3p, miR-3074-5p, miR-10a-5p, miR-412-3p, miR-450b-3p, miR-378f, miR-7975, miR-2319a, miR-376b-3p, miR-3065-5p, miR-3970, miR-654-3p, miR-345-5p, miR-6240, miR-2483-5p, miR-125a-5p, miR-17-5p, miR-106a-5p, miR-330-3p, miR-105-5p, miR-3431, miR-134-3p, miR-20b, miR-340-3p, miR-31-5p, miR-339-5p, miR-2284x, miR-26a-2-3p, novel\_23, miR-3071-5p, miR-374a-3p, miR-93, miR-378c, miR-28a-3p, miR-6128, miR-134-5p, miR-374b-3p, miR-370-5p, miR-34c-3p, miR-3969, miR-144, miR-6740-5p, miR-125b-5p, miR-3959-5p, miR-769, miR-154b-5p, miR-3957, miR-133c, miR-3957-5p, miR-141-3p, miR-125a, miR-2285aa, miR-345-5p, miR-2318, miR-876-3p, miR-1814c, miR-20b-5p, miR-3074-1-3p, miR-301, miR-488-3p, miR-17-5p, miR-93-5p, miR-3529-3p, miR-495-5p, miR-127-5p, miR-28-3p, miR-200a-3p, miR-376b-3p, miR-339a, miR-217, miR-378h, miR-129-1-3p, miR-134-5p, miR-2284z, miR-2285ad, novel\_79, miR-10a-5p, miR-134, miR-1290, miR-330-5p, novel\_111, miR-361-3p, miR-877-3p, miR-3968, miR-2285n, miR-382-3p, miR-107-5p, miR-2285y, miR-769-5p, miR-378e, miR-3596, miR-378g, miR-454-5p, miR-376d, miR-2319b, miR-504, miR-1983, miR-376a-3p, miR-335-3p, miR-378j, miR-378d, miR-2310, miR-101b-3p, miR-124a, miR-487b-5p, miR-103a-2-5p, miR-326, miR-106b-5p, miR-323b-3p, miR-2957, miR-376b-3p, miR-330-3p, miR-1343-3p, miR-2426, miR-378c, miR-2284aa, miR-10b, miR-484, miR-378b, miR-323b, miR-7857, miR-769-5p, miR-10b-5p, miR-129-2-3p, miR-3074-5p, miR-145a-3p, miR-378c, miR-2330-3p, novel\_74, miR-874-5p, miR-10a, novel\_32, miR-221-5p, miR-504-5p, miR-378a-3p, miR-370-5p, miR-216b-3p, miR-339b, miR-345-5p, miR-1827, miR-3613-5p, miR-2424, miR-216c-5p, miR-345-3p, miR-20a, miR-760-3p, miR-221-5p, miR-30b-3p, miR-1277-5p, miR-



novel\_127, miR-152-3p, novel\_96, miR-127-5p, novel\_39, miR-2284y, miR-200a, miR-450b-5p, miR-3064-5p, miR-30c, miR-885-3p, miR-2427, miR-330-5p, miR-3591-5p, miR-134-5p, miR-450a-1-3p, novel\_121, miR-505-5p, miR-322-5p, novel\_79, miR-2285ad, miR-299a-3p, miR-429-3p, miR-6517, miR-134-5p, miR-100-3p, miR-193a-5p, miR-16-5p, miR-30e-5p, miR-3959-5p, miR-3956, miR-106b-3p, miR-193a-3p, miR-105-5p, novel\_51, miR-2411-3p, miR-146a, miR-432-3p, miR-432-3p, miR-4508, miR-497-5p, miR-16b, miR-450c-3p, miR-134-3p, miR-339-5p, miR-103a-3p, miR-6119-3p, miR-28c, miR-199b-5p, miR-193b-3p, miR-2319a, miR-146b-5p, miR-1306, miR-150-5p, miR-216a-3p, miR-3065-5p, miR-148a-3p, miR-6535, miR-320c, miR-669, miR-299b-3p, miR-3120-3p, miR-2484, miR-324-3p, miR-345-3p, miR-30b, novel\_17, miR-486-3p, miR-376a-5p, miR-218-1-3p, miR-133a-3p, miR-34a-5p, miR-2284u, miR-33b-3p, miR-30c-5p, miR-328-3p, miR-212-5p, miR-18a-3p, miR-4492, miR-669a-3p, miR-30a-3p, miR-665, miR-2285j, miR-30e-3p, miR-6525, miR-224-5p, miR-214, miR-885-3p, miR-625-5p, miR-1827, miR-339b, miR-129b-3p, miR-30d-5p, miR-450a-1-3p, miR-15b-5p, miR-10a, miR-30c-1-3p, miR-199b-5p, miR-146b, miR-153-3p, miR-103a-2-5p, miR-214-3p, miR-491-5p, miR-323b-3p, miR-16b, miR-2284b, miR-574-3p, miR-323b, miR-455-3p, miR-2459, miR-153, miR-147a, miR-145b, miR-1343-3p, novel\_82, miR-2440, miR-101-3p, miR-877-3p, miR-2447, miR-885-5p, miR-136-5p, miR-378g, miR-2285u, miR-24-1-5p, miR-2284g, miR-2319b, miR-107, miR-17-3p, miR-200c-3p, miR-181b-5p, miR-30c-2-3p, miR-339a, miR-376b-3p, miR-2285af, miR-200c, miR-1957a, miR-199a-5p, miR-3065-3p, miR-24-2-5p, miR-28b, miR-30a-3p, miR-105-2, miR-200b-3p, miR-128-3p, miR-10a-5p, miR-300, miR-218-2-3p, miR-30a-5p, miR-345-3p, miR-134, miR-582-3p, miR-214-5p, miR-302a-5p, miR-123-3p, miR-28-5p, miR-486b-3p, miR-138-

miR-365a-5p, miR-378c, miR-16-5p, miR-767-5p, miR-138-5p, miR-134-5p, miR-410-3p, miR-29b-3p, miR-6740-5p, miR-34c-5p, miR-503-3p, miR-1271, miR-615-5p, miR-141-3p, miR-598-3p, miR-2355-5p, miR-370-3p, miR-345-5p, miR-329b, miR-10b-3p, miR-767, miR-485-5p, miR-190a-3p, miR-488-3p, miR-18a, miR-28b, miR-148b-5p, novel\_39, miR-29a-5p, miR-3529-3p, miR-181a-2-3p, miR-30a-3p, miR-450a-2-3p, miR-200a-3p, novel\_96, miR-2285af, miR-378h, miR-24-2-5p, miR-322-5p, miR-134-5p, miR-450a-1-3p, miR-222, miR-18b-5p, miR-412, miR-1224-5p, miR-134, miR-330-5p, miR-29d-3p, miR-1343-5p, miR-371b-3p, miR-24-3p, miR-2285m, miR-301b-3p, miR-2284w, miR-326-3p, miR-449a, miR-335-5p, miR-342-3p, miR-29c-3p, novel\_101, miR-29a, miR-502b, miR-28c, miR-502-5p, miR-15a, miR-33a-3p, miR-34c, miR-16a, miR-29a-3p, miR-34b, miR-146b-3p, miR-323a-5p, miR-329-5p, novel\_68, miR-378f, miR-195a-5p, miR-6516-3p, miR-9851-3p, miR-2319a, miR-18b, miR-3065-5p, miR-1306, miR-503-3p, miR-345-5p, miR-296-3p, miR-124-5p, miR-106b-3p, miR-1343-5p, miR-296-3p, miR-224-5p, novel\_51, miR-365b-5p, miR-3431, miR-194-3p, miR-149-5p, miR-122-3p, miR-377-5p, miR-130a-3p, miR-16-1-3p, miR-29b, miR-138, miR-16b, miR-2284x, miR-27b-3p, miR-497-5p, miR-653, miR-450c-3p, miR-197-3p, miR-22-3p, miR-224-5p, miR-346, miR-378c, miR-214, miR-3074-2-3p, miR-664a, miR-450b-3p, miR-454-3p, miR-424-5p, miR-30e-3p, miR-2285j, miR-222-3p, miR-320e, miR-3604, miR-30a-3p, miR-324-3p, miR-323-5p, miR-301a-3p, miR-15b-5p, miR-22-3p, miR-2331-3p, miR-378a-3p, miR-296-3p, miR-18a-5p, miR-345-5p, novel\_99, miR-625-5p, miR-450a-1-3p, miR-129b-3p, miR-598-3p, miR-377-5p, miR-2285w, miR-329a-5p, miR-34b-5p, novel\_17, miR-196a-3p, miR-92a-1-5p, miR-422a, miR-15a-5p, miR-2284h-5p, miR-30d-3p, miR-34a-5p, miR-16-1-3p, miR-133a-3p, miR-378i, novel\_133, miR-378a-3p, miR-491-5p, miR-874-5p, miR-708-5p, miR-130b-5p, miR-28-5p, novel\_96, miR-503-5p, miR-125a-3p, miR-135a-2-3p, miR-130b-5p, miR-503-5p, miR-22-3p, miR-378g, miR-503-5p, miR-134-3p, miR-22-3p, miR-370-3p, miR-1271, miR-2285aa, miR-2355-5p, miR-216b-3p, miR-548o-3p, miR-545-3p, miR-1185-2-3p, miR-203-3p, novel\_25, miR-34b, miR-411b-3p, novel\_69, miR-34c-5p, miR-3065-5p, miR-361-3p, miR-9-3p, miR-186-5p, miR-493-5p, miR-107, let-7g-3p, miR-425-5p, miR-28a-3p, miR-449a, miR-409-3p, miR-34c, miR-2440, miR-576-3p, miR-382-3p, miR-218-5p, miR-22-5p, miR-5010-3p, miR-103a-3p, miR-103, miR-1185-3p, miR-582-3p, miR-412-5p, miR-34a-5p, miR-142-3p, miR-582-3p, miR-668-3p, miR-493-5p, miR-2285r, miR-185-3p, miR-6119-5p, miR-34b-5p, miR-107, miR-28-3p

NCOA5 ENSOARGO(nuclear

C14orf79 ENSOARGO(chromoso

TPD52 ENSOARGO(tumor pr

miR-155-5p, miR-34b-3p, miR-134, miR-3578, miR-2284z, miR-134-5p, novel\_121, miR-505-5p, miR-758-5p, miR-6516-5p, miR-378h, miR-2411-5p, miR-18b-5p, miR-2285ad, miR-299a-3p, miR-152-3p, miR-543-5p, novel\_96, miR-2898, miR-450a-2-3p, miR-181b-5p, miR-127-5p, miR-30f, miR-205-5p, miR-376b-3p, miR-1260a, miR-2285af, miR-6119-5p, novel\_39, miR-29a-5p, miR-1271-3p, miR-450b-5p, miR-148b-5p, miR-1, miR-3064-5p, miR-20b-5p, miR-10b-3p, miR-345-5p, let-7g-3p, miR-93-5p, miR-23b, miR-18a, miR-17-5p, miR-320a, miR-3154, miR-154b-5p, miR-370-3p, miR-2355-5p, miR-2285aa, miR-1271, miR-3068-3p, miR-874-3p, miR-31-3p, miR-134-5p, miR-100-3p, miR-409-3p, miR-135a-5p, miR-370-5p, miR-378c, miR-93, miR-1260b, miR-1197-3p, miR-6128, miR-1306-5p, miR-2284x, miR-21-5p, miR-1260b, miR-16-1-3p, miR-194-5p, miR-19b-2-5p, miR-432, miR-1843b-5p, miR-1285, miR-1434-3p, miR-181a-5p, miR-

NOL8 ENSOARGO(nucleola:6238, novel\_116, miR-20b, miR-432-5p, miR-134-3p, miR-665, miR-31-5p, miR-133b-5p, miR-106b-3p, miR-190a, miR-194a, miR-106a-5p, miR-17-5p, miR-2411-3p, miR-146a, miR-345-5p, miR-654-3p, miR-432-3p, miR-432-3p, miR-2284l, miR-146b-5p, miR-135b-5p, miR-505-3p, miR-378f, miR-376b-3p, miR-3591-3p, miR-21c, miR-148a-3p, miR-18b, miR-669, miR-320c, miR-677, miR-181b-3p, miR-670-3p, miR-299b-3p, miR-378b, miR-3074-5p, miR-203b-5p, miR-147-5p, novel\_1, miR-206, miR-4324, miR-20a-5p, miR-2428, miR-1839-3p, miR-1193, miR-16-1-3p, miR-4429, novel\_73, miR-33b-3p, miR-142-3p, miR-1434-5p, miR-378a-3p, miR-140-3p, miR-5703, novel\_133, miR-378i, miR-2300b-3p, miR-532-3p, miR-199a-3p, miR-23b-3p, miR-7859, miR-23c, miR-340-5p, miR-148b-3p, miR-3600, miR-505-3p, miR-30d-3p, miR-106a, miR-221-5p, miR-299-3p, miR-106a, miR-320d, miR-219b-5p, miR-345-3p, miR-422a, miR-618, miR-210-5p, miR-2411, miR-146a-5p, miR-142-3p, miR-376a-5p, miR-181b-1-

let-7i, miR-502-5p, miR-6402, novel\_101, miR-326-3p, miR-24-3p, miR-150-5p, miR-21c, miR-18a-3p, miR-9851-3p, miR-505-3p, let-7e-5p, miR-135b-5p, miR-450b-3p, miR-3074-5p, miR-6535, miR-677, miR-181b-3p, novel\_69, miR-365b-5p, miR-197-5p, miR-455-5p, miR-2411-3p, miR-660, miR-196b-5p, miR-363-5p, miR-493-5p, miR-539-3p, miR-2285r, miR-542-3p, miR-2113, miR-4508, miR-26a-2-3p, miR-455-5p, miR-744-5p, miR-138, miR-30b-3p, miR-26b-3p, let-7g-5p, miR-331-3p, miR-135a-5p, miR-409-3p, novel\_63, miR-138-5p, miR-103b, miR-1306-5p, miR-365a-5p, miR-500b-5p, miR-362-5p, miR-30e-5p, miR-381-3p, miR-2355-5p, miR-2285aa, miR-487a-3p, miR-874-3p, miR-300-3p, miR-30c-2-3p, miR-217, let-7c-5p, miR-2285af, miR-205-5p, novel\_96, novel\_127, miR-2898, let-7f-5p, miR-3064-5p, miR-1957a, let-7g, miR-24-2-5p, miR-30a-5p, miR-330-5p, miR-345-3p, miR-196a-5p, miR-300, let-7d, miR-582-3p, miR-1224-5p, miR-431, miR-129-1-3p, miR-6516-5p, miR-107-5p, miR-2285n, miR-490-5p, miR-154-3p, miR-2284q, miR-499a-5p, miR-219a-5p, miR-2447, miR-212-3p, miR-423-5p, miR-361-3p, miR-362-5p, novel\_111, miR-129b-5p, miR-378j, miR-361-3p, miR-493-5p, miR-544-5p, miR-7977, miR-24-1-5p, miR-3064-5p, miR-20a-3p, let-7d-5p, miR-25, miR-2483-3p, miR-29b-1-5p, miR-326, miR-431-5p, let-7e, miR-103a-2-5p, miR-491-5p, miR-3085-3p, miR-33a-5p, miR-376b, miR-124a, let-7a-5p, miR-4532, miR-30c-1-3p, miR-30b-3p, miR-3962, miR-484, miR-21b, miR-101c, miR-181b-2-3p, miR-216a-3p, miR-500-5p, miR-421, miR-142-3p, miR-665, let-7f, miR-4492, miR-487a-5p, miR-664a, miR-2330-3p, let-7b, miR-539-5p, miR-129-2-3p, miR-3074-5p, miR-3184-3p, miR-4510, let-7b-5p, miR-3184-5p, miR-129b-3p, miR-27b-5p, miR-30d-5p, miR-21a-3p, miR-625-5p, miR-1827, miR-154b-3p, miR-154a-3p, miR-221-5p, miR-30c-1-3p, miR-660-5p, miR-204-3p, let-7i-5p, miR-877-5p, miR-6516, miR-6130, miR-500a-

miR-323a-5p, miR-2404, miR-411b-3p, miR-144-3p, miR-10a-5p, miR-146b-5p, miR-2319a, miR-6516-3p, miR-150-5p, miR-371b-3p, novel\_27, miR-199b-5p, miR-376a-3p, miR-2285x, novel\_1, miR-379-3p, miR-142b, miR-33a-3p, miR-2355-3p, miR-31-5p, miR-487b-3p, miR-380-3p, miR-2284ab, miR-708-3p, miR-181a-5p, miR-1434-3p, miR-450c-3p, miR-432-3p, let-7a-2-3p, miR-668-3p, miR-377-3p, miR-146a, miR-105-5p, miR-199a-5p, miR-503-3p, miR-329a, let-7g-3p, novel\_48, miR-376c-5p, miR-23b, miR-376c-5p, miR-144-5p, miR-133a-3p, miR-134-5p, miR-486b-3p, miR-2433, novel\_63, miR-144, miR-24-2-5p, miR-134-5p, miR-582-3p, miR-450a-1-3p, miR-545-5p, miR-2284z, miR-2285ad, miR-222, miR-429-3p, miR-411-3p, miR-105-2, miR-155-5p, miR-200b-3p, let-7a-2-3p, miR-10a-5p, miR-1290, miR-134, miR-218-2-3p, miR-2427, miR-24-2-5p, miR-199a-5p, miR-1957a, miR-2284y, miR-2284a, miR-3529-3p, miR-30a-3p, miR-2385-3p, miR-4286, miR-450a-2-3p, miR-200c-3p, miR-181b-5p, miR-2285af, miR-205-5p, miR-200c, miR-125a-3p, miR-217, miR-144-5p, miR-1185-2-3p, miR-2284g, miR-24-1-5p, miR-10b, miR-20a-3p, miR-2319b, miR-2285u, miR-374b-5p, miR-541-5p, miR-136-5p, miR-668-5p, miR-493-5p, miR-877-3p, miR-221, miR-199b-5p, miR-877-3p, novel\_60, miR-3956-3p, miR-181d-5p, miR-2285n, novel\_82, miR-153, miR-221-3p, miR-1185-3p, miR-105-1, miR-362-3p, miR-2284aa, miR-101c, miR-21b, miR-16-2-3p, miR-329-3p, miR-10b, miR-758-3p, miR-8485, miR-193a, miR-758-3p, miR-101b-3p, miR-23a-3p, miR-2284b, miR-3955-3p, miR-199b-5p, miR-146b, miR-153-3p, novel\_103, miR-2957, miR-362-3p, miR-10a, miR-323-5p, miR-155-5p, miR-2331-3p, miR-548o-3p, miR-216b-3p, miR-133b-3p, let-7g-3p, miR-543-3p, miR-450a-1-3p, miR-129b-3p, miR-10b-5p, miR-181c-5p, miR-539-5p, miR-425-5p, miR-450b-3p, miR-155-5p, miR-6516-3p, miR-208b-5p, miR-129-5p, miR-222-3p, miR-30a-3p, miR-30a-3p, miR-

miR-2285g, miR-134-3p, miR-185-5p, miR-503-5p, miR-149-5p, miR-194-3p, miR-103, miR-187-3p, miR-103a-3p, miR-339-5p, miR-16b, miR-30b-3p, miR-497-5p, miR-26a-2-3p, miR-744-5p, miR-27b-3p, miR-7862, miR-653, miR-708-3p, miR-22-3p, miR-374b-3p, miR-130b-5p, miR-382, miR-668-3p, miR-125a-5p, miR-660, miR-1343-5p, miR-503-5p, miR-2411-3p, novel\_51, miR-374c-3p, miR-677, novel\_68, miR-3074-5p, miR-320b, miR-26b-5p, miR-1291, miR-412-3p, miR-107, miR-195a-5p, miR-378f, miR-216a-3p, miR-24-3p, miR-2428, miR-199b-5p, miR-3957-3p, miR-17-3p, miR-128-1-5p, miR-147-5p, miR-15a, miR-4324, miR-16a, miR-322-5p, miR-378h, miR-222, miR-196a-2-3p, novel\_79, miR-1224-5p, miR-128-3p, miR-345-3p, miR-3591-5p, miR-1343-5p, miR-200a, miR-199a-5p, miR-3065-3p, miR-29a-5p, miR-192-3p, miR-1271-3p, miR-3529-3p, miR-3064-5p, miR-17-3p, miR-2898, miR-107, miR-200a-3p, miR-125a-3p, miR-30c-2-3p, miR-217, miR-339a, miR-374c-3p, miR-365a-3p, miR-199a-5p, miR-874-3p, miR-2355-5p, miR-141-3p, miR-125a, miR-767, miR-7144-5p, miR-485-5p, miR-1814c, miR-1197-3p, miR-378c, miR-16-5p, miR-3607-3p, miR-767-5p, miR-125b-5p, miR-153, miR-496-5p, miR-455-3p, miR-221-3p, miR-2285e, miR-2300a-5p, miR-409b, miR-27a-3p, miR-181b-2-3p, miR-378c, miR-101c, miR-3120-5p, miR-378b, miR-143-5p, miR-541, miR-30b-3p, miR-378d, miR-30c-1-3p, miR-8485, miR-2310, miR-424-5p, miR-2330-5p, miR-3085-3p, miR-199b-5p, miR-153-3p, novel\_103, miR-16b, miR-378g, miR-378e, miR-3082-5p, miR-27a-3p, miR-4443, miR-3064-5p, miR-4792, miR-10b, miR-20a-3p, miR-7977, miR-504, miR-1983, miR-361-3p, miR-199b-5p, miR-221, miR-877-3p, miR-361-3p, miR-7705, miR-541-3p, miR-452-5p, miR-3968, miR-490-5p, miR-2285t, miR-101-3p, miR-15a-5p, miR-151-5p, miR-33b-3p, miR-378d, miR-378i, miR-2408, miR-193b-5p, miR-2904, miR-5703, miR-1197-5p, miR-378a-3p, miR-217-5p, miR-188-3p, miR-216c-3p, miR-378j, miR-1197-5p, miR-6130, miR-142-3p, miR-7857-3p, novel\_25, miR-3960, miR-125a, miR-592, miR-125a-5p, miR-205-5p, novel\_51, miR-125b, miR-125b-5p, novel\_111, miR-142a-3p, miR-877-3p, miR-6412, miR-2432, miR-4510, miR-145a-3p

STX4

ENSOARGO(syntaxin

VEGFA

ENSOARGO(vascular

miR-483-3p, miR-125a-5p, miR-1343-5p, miR-377-3p, miR-330-3p, miR-105-5p, miR-3141, miR-6240, miR-628-5p, miR-382, miR-668-3p, miR-138, miR-29b, miR-30b-3p, miR-7862, miR-744-5p, miR-181a-5p, miR-2113, miR-22-3p, miR-3431, miR-544b, miR-149-5p, miR-194-3p, miR-31-5p, miR-29a, miR-147-5p, miR-28c, miR-502-5p, miR-2428, miR-495-3p, miR-29c-3p, miR-17-3p, miR-1291, miR-3141, miR-2285ab, miR-1306, miR-150-5p, miR-29a-3p, miR-669, miR-6535, novel\_68, miR-3120-3p, miR-10a-5p, miR-127-5p, miR-181b-5p, miR-17-3p, miR-543-5p, miR-125a-3p, miR-28b, novel\_39, miR-3065-3p, miR-3064-5p, miR-582-3p, miR-10a-5p, miR-105-2, miR-1343-5p, miR-29d-3p, miR-483-3p, novel\_121, miR-545-5p, miR-196a-2-3p, miR-138-5p, miR-486b-3p, miR-29b-3p, miR-2433, miR-125b-5p, miR-6740-5p, miR-6128, miR-193a-5p, miR-485-5p, miR-1248, miR-3154, miR-769, miR-125a, miR-25-5p, miR-3085-3p, miR-1185-5p, miR-153-3p, miR-1306-5p, miR-5126, novel\_19, miR-4532, miR-3187-3p, miR-33a-5p, miR-544a, miR-2426, miR-1388-5p, miR-301b-5p, miR-10b, miR-30b-3p, miR-153, miR-2459, miR-455-3p, miR-105-1, miR-330-3p, novel\_78, novel\_82, miR-301a-5p, miR-371a-5p, miR-769-5p, miR-877-3p, miR-361-3p, miR-423-5p, miR-219a-5p, miR-181d-5p, miR-452-5p, miR-2285f, miR-136-5p, miR-499a-3p, miR-4443, miR-452-3p, miR-4792, miR-3064-5p, miR-7977, miR-760-3p, miR-2484, miR-21-3p, miR-3653-3p, novel\_17, miR-210-5p, miR-185-3p, miR-125b, miR-125b-2-3p, miR-486-3p, miR-133a-3p, miR-188-3p, miR-2904, miR-383-5p, miR-532-3p, novel\_83, miR-2284h-5p, miR-3960, miR-212-5p, miR-1b-3p, miR-17-3p, miR-664a, miR-4492, miR-2285j, miR-664a-5p, miR-10b-5p, miR-769-5p, miR-181c-5p, miR-3184-5p, miR-665-5p, miR-2330-3p, miR-2312, miR-1827, miR-625-5p, miR-543-3p, miR-10a, miR-544-3p, miR-499b-3p, miR-377-3p, miR-877-5p, miR-22-3p, miR-532-5p, miR-3065-3p, miR-3065-3p, novel\_39, miR-424-5p, miR-16b, miR-194a, miR-15a-5p, miR-322-5p, miR-149-5p, miR-151-5p, novel\_78, miR-16b, miR-29b, miR-497-5p, miR-664-5p, miR-296-5p, miR-194-5p, miR-29d-3p, miR-1197-3p, miR-361-3p, novel\_42, miR-29c-3p, miR-194b-5p, miR-16-5p, miR-29a, miR-664a, miR-4726-5p, miR-424-5p, miR-410-5p, miR-29b-3p, miR-15a, miR-665, miR-1973, miR-16a, miR-29a-3p, miR-15b-5p, miR-151b, miR-2331-3p, miR-3065-3p, miR-195a-5p, miR-2387, miR-361-3p

CAMK2G ENSOARGO( calcium/

LDLRAD2 ENSOARGO( low dens

miR-2411, miR-2424, miR-2432, miR-486-3p, miR-143-3p, miR-421-5p, miR-376a-5p, miR-376c-3p, miR-195a-3p, let-7k, miR-466i-5p, miR-760-3p, miR-98-5p, miR-219b-5p, miR-185-3p, miR-210-5p, miR-7859, miR-383-5p, miR-15a-5p, miR-3600, miR-18a-3p, miR-548e-3p, miR-218-1-3p, miR-361-5p, miR-184-3p, miR-2904, novel\_133, miR-2300b-3p, miR-1961, let-7b-5p, miR-3184-5p, miR-6134, miR-6525, miR-224-5p, miR-214, let-7b, miR-539-5p, miR-145a-3p, miR-424-5p, miR-669a-3p, miR-130b-5p, novel\_74, miR-17-3p, miR-324-3p, miR-664a-5p, let-7f, miR-204-3p, let-7i-5p, miR-15b-5p, miR-582-5p, miR-376e-3p, miR-656-3p, miR-216b-3p, miR-504-5p, miR-30c-1-3p, miR-625-5p, miR-1827, miR-582-5p, miR-2312, let-7g-3p, miR-345-5p, miR-129b-3p, miR-433-3p, let-7f-1-3p, miR-3613-5p, miR-8485, miR-758-3p, miR-30c-1-3p, miR-33a-5p, let-7a-5p, miR-382-3p, miR-424-5p, miR-199b-5p, let-7e, miR-214-3p, miR-3085-3p, miR-16b, miR-342, miR-1306-5p, miR-431-5p, miR-9788-3p, miR-1185-3p, miR-1298-3p, miR-1343-3p, miR-199b-3p, miR-548w, miR-16-2-3p, miR-2284aa, miR-450b-5p, miR-758-3p, miR-125b-2-3p, miR-4791, miR-8095, miR-1285-5p, miR-423-5p, miR-7705, miR-877-3p, miR-361-3p, miR-2285f, miR-9-5p, miR-2447, novel\_60, miR-3956-3p, miR-490-5p, miR-2285t, miR-4726-5p, miR-371a-5p, novel\_82, miR-2440, let-7d-5p, miR-4443, miR-1185-2-3p, miR-3082-5p, miR-489, miR-499b-5p, miR-541-5p, miR-7977, miR-3064-5p, miR-20a-3p, miR-1983, miR-3963, miR-504, miR-136-5p, miR-129b-5p, miR-381-3p, miR-140-5p, miR-361-3p, miR-199b-5p, miR-200a, miR-199a-5p, let-7g, miR-490-3p, miR-2478, miR-3064-5p, miR-181a-2-3p, novel\_127, miR-543-5p, miR-200a-3p, miR-17-3p, miR-450a-2-3p, let-7f-5p, miR-30c-2-3p, let-7c-5p, miR-1260a, miR-2284z, novel\_121, miR-9-5p, miR-322-5p, miR-2411-5p, miR-1224-5p, miR-431, miR-429-3p, let-7a-2-3p, let-7d, miR-196a-5p, miR-365a-5p, miR-1343-3p, miR-339-5p, miR-147a, miR-496-5p, miR-544b, miR-542-3p, miR-301b-5p, miR-450c-3p, miR-544a, miR-1260b, miR-744-5p, miR-2889, miR-1388-3p, miR-376b, miR-668-3p, miR-432-3p, miR-345-5p, miR-4532, miR-1306-5p, novel\_51, miR-491-5p, miR-2319b, miR-7977, miR-541-5p, miR-320b, miR-34b, miR-669, miR-2387, miR-378j, miR-129b-5p, miR-1306, miR-1291, novel\_111, miR-449a, miR-2440, miR-301a-5p, miR-34c, miR-421-5p, miR-22-5p, miR-30d-3p, novel\_79, miR-1224-5p, miR-215-5p, miR-885-3p, miR-493-3p, miR-34a-5p, miR-133a-3p, miR-29b-2-5p, miR-30a-3p, miR-200a, miR-2432, miR-2424, miR-1260a, miR-92a-1-5p, miR-339a, miR-185-3p, miR-324-3p, miR-466i-5p, novel\_96, miR-221-5p, miR-34b-5p, miR-874-3p, miR-221-5p, miR-552-3p, miR-296-3p, miR-215-5p, miR-370-3p, miR-544-3p, miR-34c-5p, miR-192-5p, miR-154b-5p, miR-345-5p, miR-345-5p, miR-339b, miR-485-5p, miR-1248, miR-1827, miR-671-5p, miR-7144-5p, miR-885-3p, miR-625-5p, miR-145a-3p, miR-3074-2-3p, miR-1260b, miR-346, miR-30e-3p, miR-5100, miR-34c-3p, miR-664a-5p, miR-29b-2-5p, miR-30a-3p, miR-664a, miR-450b-3p, miR-874-5p, miR-487a-5p, miR-410-3p, miR-4492, miR-129-5p, miR-2428, miR-361-3p, miR-1271, miR-214, miR-2887, miR-214-3p, miR-1343-5p, miR-136-5p, miR-450a-2-3p, novel\_19, miR-1343-5p

TACSTD2 ENSOARGO(tumor-as

CD79A ENSOARGO(CD79a mo

ARSD ENSOARGO(arylsulf



miR-19b-3p, miR-1197-5p, miR-15a-5p, miR-148b-3p, miR-322-5p, miR-328-3p, miR-17-3p, miR-200a-3p, miR-152-3p, miR-107, novel\_17, miR-210-5p, miR-2285af, miR-30c-2-3p, miR-200a, miR-181a-2-3p, miR-1827, miR-1814c, miR-1248, miR-301a-3p, miR-15b-5p, miR-30c-1-3p, miR-141-3p, miR-1271, miR-2355-5p, miR-17-3p, miR-424-5p, miR-454-3p, miR-874-5p, miR-135a-1-3p, miR-665, miR-3969, miR-145a-3p, miR-16-5p, miR-16b, miR-497-5p, miR-185-5p, miR-103, miR-455-3p, miR-103a-3p, miR-222-5p, miR-130a-3p, miR-130b-3p, miR-466f-3p, miR-1306-5p, miR-16b, miR-30c-1-3p, miR-2285r, miR-2310, miR-424-5p, let-7f-2-3p, let-7f-2-3p, miR-19a-3p, miR-107, miR-6395, miR-195a-5p, miR-7975, miR-148a-3p, miR-361-3p, miR-1306, miR-1185-2-3p, miR-7977, miR-502b, miR-15a, miR-16a, miR-301b-3p, miR-212-3p, miR-17-3p, miR-324-3p, miR-422a, miR-92a-1-5p, miR-2284m, miR-466i-5p, miR-98-5p, miR-30b-3p, miR-21-3p, let-7k, miR-29b-1-5p, miR-376a-5p, miR-130a-5p, miR-2411, miR-378i, novel\_133, miR-1961, miR-215-5p, miR-2366, miR-193b-5p, miR-378a-3p, miR-493-3p, miR-148a-5p, miR-18a-3p, miR-3960, miR-210-3p, miR-200b, miR-328-3p, let-7f, miR-19b-1-5p, miR-132-5p, miR-665, miR-664a-5p, miR-450b-3p, miR-6516-3p, miR-708-5p, miR-190a-5p, miR-4492, miR-130b-5p, miR-590-3p, let-7b, miR-378c, miR-145a-3p, miR-1271, miR-214, miR-6525, let-7b-5p, miR-450a-1-3p, miR-18a-5p, miR-625-5p, miR-1895, miR-1827, miR-30c-1-3p, miR-378a-3p, miR-1277-3p, miR-192-5p, miR-544-3p, miR-656-3p, miR-22-3p, miR-204-3p, let-7i-5p, miR-5126, miR-2957, miR-29b-1-5p, novel\_124, miR-25-5p, let-7e, miR-214-3p, let-7a-5p, miR-574-3p, miR-1839-3p, miR-33a-5p, miR-378d, miR-30c-1-3p, miR-193a, miR-4532, miR-2310, miR-378b, miR-30b-3p, miR-378c, miR-1388-5p, miR-544a, miR-1343-3p, miR-330-3p, miR-145b, miR-148b-5p, miR-2459, miR-2447, miR-2285f, miR-190b-5p, miR-452-5p, miR-96-5p, miR-136-5p, miR-1983, novel\_94, miR-877-3p, miR-20a-3p, miR-2319b, miR-499b-5p, miR-7977, miR-378g, miR-378e, miR-489, let-7d-5p, miR-200c, miR-30c-2-3p, let-7c-5p, miR-181c-3p, let-7f-5p, miR-200c-3p, miR-107, novel\_127, miR-200a-3p, miR-181a-2-3p, miR-148b-5p, miR-28b, miR-450b-5p, let-7g, miR-376c-5p, miR-376b-5p, miR-218-2-3p, miR-582-3p, let-7d, miR-200b-3p, miR-6517, miR-429-3p, miR-18b-5p, miR-2411-5p, miR-378h, miR-1271-5p, miR-450a-1-3p, novel\_63, miR-331-3p, miR-6740-5p, miR-767-5p, miR-410-3p, miR-28-5p, miR-378c, miR-365a-5p, miR-488-3p, miR-18a, miR-376c-5p, miR-10b-3p, miR-767, miR-876-3p, miR-376c-5p, miR-1248, miR-1814c, miR-3068-3p, miR-2355-5p, miR-215-5p, miR-141-3p, miR-324-5p, miR-190a, miR-330-3p, miR-365b-5p, miR-

DYNLL2 ENSOARGO(dynein),

CD40 ENSOARGO(CD40 mol)

miR-34b-3p, miR-218-2-3p, miR-29d-3p, miR-23b-5p, miR-6517, miR-7641, novel\_79, miR-196a-2-3p, miR-322-5p, miR-1260a, miR-30c-2-3p, miR-339a, miR-107, miR-543-5p, miR-152-3p, miR-181a-2-3p, miR-4286, miR-380-5p, miR-3065-3p, miR-29a-5p, miR-2448-3p, miR-200a-5p, miR-3154, miR-7144-5p, miR-23a-5p, miR-1248, miR-487a-3p, miR-125a, miR-1271, miR-769, miR-3959-5p, miR-223-5p, miR-376c-3p, miR-29b-3p, miR-410-5p, miR-494-5p, miR-5100, miR-125b-5p, miR-3969, miR-31-3p, miR-204-5p, miR-16-5p, miR-6128, miR-1260b, miR-365a-5p, miR-145-3p, miR-432, miR-708-3p, miR-7b-5p, miR-3071-5p, miR-29b, miR-16b, miR-1260b, miR-497-5p, miR-188-5p, miR-2284x, miR-133b-5p, miR-103a-3p, miR-130a-3p, miR-339-5p, miR-432-5p, miR-185-5p, miR-149-5p, miR-103, miR-7-5p, miR-365b-5p, miR-2411-3p, novel\_51, miR-660, miR-125a-5p, miR-380-5p, miR-654-3p, miR-148a-3p, miR-1306, miR-378b, miR-107, miR-6516-3p, miR-195a-5p, novel\_68, miR-320b, miR-670-3p, miR-411b-3p, miR-29a-3p, miR-15a, miR-4324, miR-576-3p, miR-16a, miR-29a, miR-342-3p, miR-29c-3p, miR-211, miR-301b-3p, miR-2300b-3p, miR-193b-5p, miR-376a-5p, miR-188-3p, miR-1197-5p, miR-5703, miR-361-5p, miR-548e-3p, miR-212-5p, miR-7859, miR-487a-3p, miR-148b-3p, miR-15a-5p, miR-199a-3p, miR-532-3p, miR-210-5p, novel\_17, miR-324-3p, miR-125b, miR-345-3p, miR-760-3p, miR-221-5p, miR-487a, miR-345-3p, miR-376c-3p, miR-143-3p, miR-129b-3p, miR-487b-5p, let-7g-3p, miR-154b-3p, miR-339b, miR-543-3p, miR-1827, miR-221-5p, miR-30c-1-3p, miR-660-5p, miR-154a-3p, miR-216b-3p, miR-3065-3p, miR-182-5p, miR-301a-3p, miR-376e-3p, miR-499b-3p, miR-27a-5p, miR-2284s, miR-132-5p, miR-216b-5p, novel\_25, novel\_32, miR-15b-5p, miR-324-3p, miR-665, novel\_74, miR-487b-5p, miR-424-5p, miR-129-5p, miR-454-3p, miR-214, miR-769-5p, miR-6529a, miR-2284r, miR-143-5p, miR-7857, miR-3120-5p, miR-2300a-5p, miR-147a, miR-let-7a-2-3p, miR-491-3p, miR-8485, miR-539-3p, miR-4532, miR-6240, miR-494-3p, miR-124a, miR-214-3p, miR-199b-5p, miR-330-3p, miR-320b, miR-412-5p, miR-222-5p, miR-665, miR-330-3p, novel\_4, miR-1260b, miR-223-3p, miR-199b-5p, miR-2284w, miR-877-3p, miR-2447, miR-3968, miR-4726-5p, miR-628-3p, miR-502-5p, miR-382-3p, miR-320c, novel\_69, miR-670-3p, miR-3120-3p, miR-3074-5p, miR-147-3p, miR-378b, miR-3970, miR-199b-5p, miR-2411, miR-199a-5p, miR-5100, miR-200a-3p, miR-221-5p, miR-320d, miR-1260a, miR-2411-5p, miR-487a-3p, miR-485-3p, miR-3600, miR-4429, miR-885-3p, miR-124-3p, miR-376a-5p, miR-191, novel\_133, miR-1260b, miR-1197-3p, miR-214, miR-665-5p, miR-193a-5p, miR-4510, miR-3074-5p, miR-191-5p, miR-592, miR-664a, miR-6740-5p, miR-2433, miR-154b-5p, miR-204-3p, miR-199a-5p, miR-6130, miR-141-3p, miR-2355-5p, miR-221-5p, miR-885-3p, let-7g-3p, miR-320a

miR-330-5p, miR-299a-3p, miR-24-2-5p, miR-302a-5p, miR-505-5p, miR-129-1-3p, miR-200c, miR-125a-3p, miR-450a-2-3p, miR-2898, miR-200c-3p, novel\_127, miR-3064-5p, miR-495-5p, miR-30a-3p, miR-4286, miR-24-2-5p, novel\_39, miR-29a-5p, miR-490-3p, miR-1271-3p, miR-488-3p, miR-320a, miR-876-3p, miR-345-5p, miR-329a, miR-190a-3p, miR-485-5p, miR-874-3p, miR-2355-5p, miR-99a-3p, miR-615-5p, miR-125a, miR-410-5p, miR-551b-3p, miR-99b-3p, miR-5100, miR-125b-5p, miR-331-3p, miR-100-3p, miR-6740-5p, miR-135a-5p, miR-204-5p, novel\_42, miR-103b, miR-323-3p, miR-1843b-5p, miR-22-3p, miR-197-3p, novel\_23, miR-30b-3p, miR-744-5p, miR-188-5p, miR-2285g, miR-134-3p, miR-224-5p, miR-3141, miR-2331-5p, miR-378a-5p, miR-660, miR-125a-5p, miR-668-3p, miR-345-5p, miR-2285ab, miR-3141, miR-18a-3p, miR-1291, miR-412-3p, miR-2319a, miR-135b-5p, miR-505-3p, novel\_68, miR-3074-5p, miR-2404, miR-670-3p, miR-299b-3p, miR-320c, miR-6535, miR-6402, miR-6123, miR-211, miR-326-3p, miR-362-3p, miR-2366, miR-1197-5p, miR-4429, miR-133a-3p, miR-148a-5p, miR-378d, miR-18a-3p, miR-3960, miR-3600, miR-212-5p, miR-30d-3p, miR-505-3p, miR-151-5p, novel\_83, miR-210-5p, miR-324-3p, miR-125b, miR-92a-1-5p, miR-185-3p, miR-320d, miR-760-3p, miR-99a-3p, miR-299-3p, miR-216c-5p, miR-345-3p, miR-664b-3p, miR-29b-1-5p, miR-125b-2-3p, miR-299, miR-2285c, miR-2312, miR-345-5p, miR-625-5p, miR-1827, novel\_99, miR-504-5p, miR-140-5p, miR-660-5p, miR-296-3p, miR-6130, miR-22-3p, miR-204-3p, miR-151b, miR-324-3p, miR-30a-3p, miR-320e, miR-664a-5p, miR-4492, miR-874-5p, miR-4510, miR-3074-5p, miR-129-2-3p, miR-214, miR-224-5p, miR-3184-5p, miR-6134, miR-296-5p, miR-329-3p, miR-541, miR-143-5p, miR-30b-3p, miR-362-3p, miR-1839-5p, miR-3120-5p, miR-2300a-5p, novel\_78, miR-1242-3p, miR-109b, miR-147a, miR-9788-3p, miR-148b-5p, miR-541, miR-450b-5p, miR-1388-5p, miR-2284x, miR-2889, miR-2300a-5p, miR-147a, miR-142-3p, novel\_115, miR-365b-5p, miR-491-5p, miR-214-3p, miR-103a-2-5p, miR-125a-5p, miR-1343-5p, miR-2330-5p, miR-8485, miR-193a, miR-361-3p, miR-504, miR-450b-3p, miR-7975, miR-2319b, miR-4792, miR-25, miR-6535, miR-669, novel\_82, miR-30b-5p, miR-4324, miR-1247-3p, miR-107-5p, miR-425-5p, miR-3968, miR-4726-5p, miR-2285t, miR-541-3p, novel\_120, miR-2447, miR-24-3p, miR-2428, miR-423-5p, miR-376a-5p, miR-30c-5p, miR-30a-5p, miR-2904, miR-1343-5p, miR-133a-3p, miR-200b-3p, miR-30c, miR-6517, miR-429-3p, miR-200b, miR-505-5p, miR-532-3p, miR-200c, miR-210-5p, miR-30b, miR-185-3p, miR-125b, miR-30f, miR-200c-3p, novel\_96, miR-30d, miR-142a-3p, miR-130a-5p, miR-376a-5p, miR-2432, miR-29a-5p, miR-30e-5p, miR-30d-5p, miR-3154, miR-500a-3p, miR-30f, miR-133b-3p, miR-1827, miR-504-5p, miR-2331-3p, miR-615-5p, miR-125a, miR-2355-5p, miR-6130, miR-204-3p, miR-15b-3p, miR-34c-3p, miR-320e, miR-125b-5p, miR-664a, miR-500, miR-4492, miR-4510, miR-133a-3p, miR-214, miR-193a-5p, miR-3607-3p, miR-6128, miR-365a-5p, miR-3184-5p

miR-211, miR-371b-3p, novel\_27, miR-326-3p, miR-2284w, miR-15a, miR-6529b, miR-28c, miR-382-5p, miR-128-1-5p, miR-22-5p, miR-147-5p, miR-502b, novel\_68, miR-216b-3p, miR-3074-5p, miR-3120-3p, miR-10a-5p, miR-146b-3p, miR-299b-3p, miR-6535, miR-2285ab, miR-2387, miR-1306, miR-216a-3p, miR-3591-3p, miR-378b, miR-450b-3p, miR-412-3p, miR-378f, miR-195a-5p, miR-654-3p, miR-432-3p, miR-345-5p, miR-365b-5p, novel\_51, miR-194a, miR-124-5p, miR-378a-5p, miR-660, miR-1343-5p, miR-339-5p, miR-26b-3p, miR-3535, miR-412-5p, miR-185-5p, miR-149-5p, miR-194-3p, miR-2355-3p, miR-542-3p, miR-22-3p, miR-197-3p, miR-194-5p, miR-3071-5p, miR-16b, miR-138, miR-497-5p, miR-26a-2-3p, miR-4508, miR-6239, miR-27b-3p, miR-16-5p, miR-1197-3p, miR-365a-5p, miR-378c, novel\_63, miR-100-3p, miR-409-3p, miR-3969, miR-138-5p, miR-134-5p, miR-204-5p, miR-592, miR-28-5p, miR-574-5p, miR-874-3p, miR-370-3p, miR-2355-5p, miR-1271, miR-141-3p, miR-615-5p, miR-769, miR-365a-3p, miR-154b-5p, miR-3154, miR-10b-3p, miR-876-3p, miR-345-5p, miR-329a, miR-23a-5p, miR-7144-5p, miR-671-5p, miR-1248, miR-1814c, miR-3064-5p, miR-2385-3p, miR-29b-2-5p, miR-181a-2-3p, miR-28b, miR-24-2-5p, miR-3065-3p, miR-2284y, miR-125a-3p, miR-339a, miR-200a-3p, miR-299a-3p, novel\_79, miR-412, miR-322-5p, miR-378h, miR-2411-5p, miR-134-5p, miR-214-5p, miR-3591-5p, miR-134, miR-1343-5p, miR-330-5p, miR-582-3p, miR-128-3p, miR-10a-5p, miR-3059-5p, novel\_60, miR-2447, miR-3956-3p, miR-885-5p, miR-212-3p, miR-2285f, miR-1296-5p, miR-194b-5p, miR-361-3p, novel\_111, miR-154a, miR-218-5p, novel\_82, miR-101-3p, miR-769-5p, miR-490-5p, miR-2284q, miR-2284g, miR-3064-5p, miR-24-1-5p, miR-4792, miR-10b, miR-211-5p, miR-7857-3p, miR-378e, miR-2483-3p, miR-203-3p, miR-27a-3p, miR-361-3p, miR-378i, miR-504, miR-136-5p, miR-1983, miR-1388-3p, miR-2330-

miR-376b-3p, miR-27a-3p, miR-199b-3p, miR-10b-1, miR-2300a-5p, miR-1839-5p, miR-544a, miR-125b-2-3p, miR-7857, miR-412-3p, miR-1a-3p, miR-484, miR-744-3p, miR-23a-3p, miR-494-3p, let-7a-5p, miR-124a, let-7e, miR-199b-5p, miR-130b-3p, miR-27a-3p, miR-376d, miR-203-3p, let-7d-5p, miR-2285u, miR-20a-3p, miR-452-3p, miR-4792, miR-493-5p, miR-376a-3p, miR-378j, miR-199b-5p, miR-7705, novel\_111, miR-194b-5p, miR-2447, miR-7134-3p, miR-3958-3p, miR-371a-5p, miR-2285y, miR-2284h-5p, miR-200b, miR-340-5p, miR-148b-3p, miR-23b-3p, miR-16-1-3p, miR-1193, miR-140-3p, miR-124-3p, miR-1961, miR-421-5p, miR-2285w, miR-329a-5p, miR-216c-5p, let-7k, miR-221-5p, miR-98-5p, miR-500a-5p, miR-216a-5p, miR-2285p, let-7i-5p, miR-204-3p, miR-216b-5p, miR-544-3p, miR-301a-3p, miR-532-5p, miR-21-3p, miR-660-5p, miR-221-5p, miR-625-5p, miR-30f, let-7g-3p, miR-411, miR-21a-3p, let-7b-5p, miR-206-3p, miR-433-5p, let-7b, miR-454-3p, miR-155-5p, miR-664a-5p, miR-665, miR-2285j, let-7f, miR-2355-3p, miR-544b, let-7g-5p, miR-185-5p, miR-130a-3p, miR-27b-3p, miR-16-1-3p, miR-219a-1-3p, miR-3071-5p, novel\_23, miR-194-5p, miR-7b-5p, miR-2113, miR-1434-3p, miR-363-5p, miR-493-5p, miR-660, miR-194a, miR-105-5p, miR-7-5p, miR-144-3p, miR-6535, miR-411b-3p, miR-3120-3p, miR-329-5p, miR-135b-5p, let-7e-5p, miR-6516-3p, miR-450b-3p, miR-376b-3p, miR-3065-5p, miR-3591-3p, miR-148a-3p, miR-199b-5p, miR-301b-3p, novel\_27, miR-2285x, miR-147-5p, miR-421-5p, miR-625-3p, miR-206, miR-379-3p, let-7i, miR-6529b, miR-486-5p, miR-412, miR-6517, miR-429-3p, miR-2285ad, miR-105-2, miR-200b-3p, miR-300, let-7d, miR-411-3p, miR-1290, miR-3578, let-7g, miR-199a-5p, miR-2478, miR-1, miR-3529-3p, miR-152-3p, let-7f-5p, miR-200c-3p, let-7c-5p, miR-30f, miR-3071-3p, miR-200c, miR-376b-3p, miR-199a-5p, miR-141-3p, miR-370-3p, miR-329b, miR-2318, miR-124-3p, miR-338-3p, miR-103b, miR-214, miR-145a-3p, miR-767-5p, miR-29b-3p, miR-204-3p, miR-324-5p, miR-22-3p, miR-132-5p, miR-2355-5p, miR-21-3p, miR-221-5p, miR-1277-3p, miR-23a-5p, miR-2474, miR-767, miR-18a-5p, miR-329a, miR-18a, miR-3064-5p, miR-221-5p, miR-760-3p, novel\_83, miR-1247-5p, miR-532-3p, miR-18b-5p, miR-29d-3p, miR-5703, miR-2300b-3p, miR-362-3p, novel\_101, miR-29c-3p, miR-2447, miR-147-5p, miR-29a, miR-1973, miR-301a-5p, miR-378g, miR-29a-3p, miR-7689-3p, miR-3120-3p, novel\_68, miR-3064-5p, miR-9851-3p, novel\_94, miR-3591-3p, miR-361-3p, miR-18b, miR-8485, miR-432-3p, miR-363-5p, miR-214-3p, miR-466f-3p, miR-3085-3p, miR-2285v, miR-2957, miR-362-3p, miR-432-5p, miR-1298-3p, miR-134-3p, miR-31-5p, novel\_4, miR-1343-3p, miR-122-3p, miR-29b, miR-362-3p, miR-30b-3p, miR-22-3p, miR-30b-3p, miR-329-3p, miR-432, miR-296-5p, miR-2284r, miR-301b-5p

SLC10A7 ENSOARGOC solute carrier 10A7 3p, miR-3074-2-3p, miR-4791, miR-2285t, miR-489, miR-3535, miR-1185-5p

MAU2 ENSOARGOC MAU2 sirtuin 2 1973, miR-301a-5p, miR-378g, miR-29a-3p, miR-7689-3p, miR-3120-3p, novel\_68, miR-3064-5p, miR-9851-3p, novel\_94, miR-3591-3p, miR-361-3p, miR-18b, miR-8485, miR-432-3p, miR-363-5p, miR-214-3p, miR-466f-3p, miR-3085-3p, miR-2285v, miR-2957, miR-362-3p, miR-432-5p, miR-1298-3p, miR-134-3p, miR-31-5p, novel\_4, miR-1343-3p, miR-122-3p, miR-29b, miR-362-3p, miR-30b-3p, miR-22-3p, miR-30b-3p, miR-329-3p, miR-432, miR-296-5p, miR-2284r, miR-301b-5p

AAED1 ENSOARGOC AhpC/TSA 1185-5p

miR-130b-5p, miR-424-5p, miR-668-3p, miR-33a-5p, miR-654-3p, miR-296-3p, miR-3187-3p, miR-345-5p, miR-296-3p, miR-2957, miR-16b, miR-3085-3p, miR-199b-5p, miR-1343-5p, miR-145b, miR-222-5p, miR-3431, miR-147a, miR-194-3p, miR-455-3p, miR-22-3p, miR-374b-3p, miR-145a-5p, miR-16b, miR-2426, miR-497-5p, miR-877-3p, miR-24-3p, miR-219a-2-3p, miR-199b-5p, miR-15a, miR-502-5p, miR-28c, miR-6529b, miR-16a, miR-3968, miR-2285t, miR-3064-5p, novel\_68, miR-20a-3p, miR-2319b, miR-299b-3p, miR-374c-3p, miR-4443, miR-199b-5p, miR-150-5p, miR-216a-3p, miR-1291, novel\_94, miR-135b-5p, miR-195a-5p, miR-216c-5p, miR-3064-5p, miR-181a-2-3p, miR-376a-5p, miR-28b, novel\_39, miR-199a-5p, miR-1957a, miR-192-3p, miR-205-5p, miR-200c, miR-210-5p, miR-219-3p, miR-324-3p, miR-760-3p, miR-200c-3p, miR-299-3p, miR-543-5p, miR-299a-3p, miR-429-3p, miR-6517, miR-196a-2-3p, miR-322-5p, miR-200b, miR-15a-5p, miR-222-5p, novel\_121, miR-1246, miR-2300b-3p, miR-1343-5p, miR-5703, miR-23b-5p, miR-188-3p, miR-493-3p, miR-155-5p, miR-200b-3p, miR-128-3p, miR-378d, miR-145a-3p, miR-193a-5p, miR-16-5p, miR-6525, miR-338-3p, miR-219b-3p, miR-6740-5p, miR-331-3p, miR-26c, miR-665, miR-135a-5p, miR-155-5p, miR-424-5p, miR-130b-5p, miR-140-5p, miR-2331-3p, miR-374c-3p, miR-199a-5p, miR-22-3p, miR-155-5p, miR-15b-5p, miR-345-5p, miR-345-5p, miR-23a-5p, miR-3074-1-3p, miR-186-5p, miR-432-3p, miR-382, miR-106a-5p, miR-2330-5p, miR-193a-3p, miR-214-3p, miR-130b-3p, miR-106b-5p, novel\_51, miR-17-5p, miR-106a-5p, miR-505, miR-342, miR-20b, miR-544b, miR-134-3p, miR-130a-3p, miR-665, miR-1343-3p, miR-31-5p, miR-450b-5p, miR-544a, miR-22-3p, miR-1285, miR-143-5p, miR-484, miR-2284r, miR-296-5p, miR-301b-3p, novel\_111, miR-877-3p, miR-361-3p, miR-17-3p, miR-1193, miR-2285x, miR-1296-5p, miR-193b-3p, miR-342-3p, miR-147-5p, miR-2285t, miR-490-5p, novel\_1, miR-6529b, miR-20a-5p, miR-299b-3p, miR-670-3p, miR-7857-3p, miR-378g, miR-3120-3p, miR-2319b, miR-452-3p, miR-6395, miR-1291, miR-378j, miR-381-3p, miR-486-3p, novel\_39, miR-345-3p, miR-4286, miR-181a-2-3p, miR-20a, miR-299-3p, miR-543-5p, miR-191-3p, miR-17-3p, miR-106a, miR-324-3p, miR-328-3p, miR-532-3p, miR-7859, miR-7641, miR-106a, miR-299a-3p, miR-548e-3p, miR-378d, miR-300, miR-1197-5p, miR-188-3p, miR-2904, miR-1246, miR-338-3p, miR-93, miR-214, miR-4510, miR-486b-3p, miR-31-3p, miR-874-5p, miR-454-3p, miR-155-5p, miR-17-3p, miR-370-5p, miR-2285j, miR-22-3p, novel\_32, miR-193b-3p, miR-6130, miR-544-3p, miR-301a-3p, miR-532-5p, miR-370-5p, miR-2285aa, miR-874-3p, miR-485-5p, miR-20b-5p, miR-17-5p, miR-93-5p, miR-381-3p

miR-129b-3p, miR-433-3p, miR-362-5p, miR-21a-3p, miR-7144-5p, miR-574-5p, miR-140-5p, novel\_25, miR-300-3p, miR-30a-3p, novel\_63, miR-4492, miR-191-5p, miR-134-5p, miR-17-3p, miR-425-5p, miR-539-5p, miR-145-3p, miR-500b-5p, miR-1260b, miR-206-3p, miR-124-3p, miR-191, miR-134, miR-33b-3p, miR-1224-5p, miR-30d-3p, miR-18a-3p, miR-299a-3p, miR-134-5p, novel\_83, miR-383-5p, miR-3071-3p, miR-181c-3p, miR-185-3p, miR-1260a, miR-3653-3p, miR-543-5p, miR-299-3p, novel\_127, miR-202-5p, miR-17-3p, miR-760-3p, miR-466i-5p, miR-30a-3p, miR-1, miR-3064-5p, miR-345-3p, miR-216c-5p, miR-29a-5p, miR-664b-3p, miR-2478, miR-1306, miR-150-5p, miR-18a-3p, miR-2387, miR-2319a, miR-7975, miR-544-5p, miR-7977, novel\_68, miR-3064-5p, miR-489, miR-299b-3p, novel\_82, miR-576-3p, miR-203b-5p, miR-2285t, miR-502b, miR-147-5p, miR-206, miR-495-3p, miR-17-3p, miR-2428, miR-362-5p, miR-1a-3p, miR-323b, miR-197-3p, novel\_23, miR-1285, miR-1260b, miR-5010-3p, miR-133b-5p, miR-9788-3p, miR-194-3p, miR-500-5p, miR-539-5p, miR-323b-3p, miR-1306-5p, miR-124-5p, miR-3085-3p, miR-1185-5p, miR-652-5p, miR-124a, miR-8485, miR-654-3p, miR-2285r, miR-2284l, miR-483-3p, miR-222-5p, miR-194-3p, miR-2284h-5p, miR-340-3p, miR-1343-3p, miR-330-3p, miR-222-5p, miR-29b, miR-484, miR-541, miR-181a-5p, miR-29d-3p, miR-194-5p, miR-3071-5p, miR-140-3p, miR-2432, miR-1388-3p, miR-2285w, miR-6240, miR-2330-5p, miR-483-3p, miR-181b-5p, novel\_17, miR-330-3p, miR-374c-3p, miR-29a-3p, miR-3120-3p, miR-543-3p, novel\_99, miR-21a-3p, miR-150-5p, miR-487b-5p, novel\_27, miR-154a, miR-181c-5p, miR-541-3p, miR-194b-5p, miR-181d-5p, miR-665-5p, miR-29c-3p, miR-29a, miR-2284q, miR-29b-3p, miR-494-5p, miR-1973

CAB39L ENSOARGO(Calcium)

KPNB1 ENSOARGO(Caryoph)

miR-3064-5p, miR-664b, miR-452-3p, miR-541-5p, miR-7977, miR-7857-3p, miR-3082-5p, let-7d-5p, miR-27a-3p, miR-361-3p, miR-199b-5p, novel\_94, novel\_60, miR-32-3p, miR-541-3p, miR-2285f, miR-452-5p, miR-181d-5p, miR-362-5p, miR-8095, miR-154a, miR-2285n, miR-769-5p, miR-371a-5p, miR-107-5p, miR-4726-5p, miR-2284q, miR-27a-3p, miR-500-5p, miR-484, miR-30b-3p, miR-125b-2-3p, miR-450b-5p, let-7a-5p, miR-494-3p, miR-33a-5p, miR-652-5p, miR-326, miR-362-3p, miR-3085-3p, let-7e, miR-221-5p, miR-32-3p, miR-3065-3p, miR-21-3p, miR-182-5p, miR-6516, miR-323-5p, miR-193b-3p, miR-139-5p, miR-204-3p, miR-22-3p, novel\_99, miR-3074-2-3p, miR-206-3p, let-7b-5p, miR-338-3p, miR-324-3p, miR-320e, miR-450b-3p, miR-664a, miR-17-3p, miR-208b-5p, miR-548e-3p, miR-3600, miR-671-3p, novel\_133, miR-362-3p, miR-2904, miR-5703, miR-19b-3p, miR-183-5p, miR-29b-1-5p, miR-125b-2-3p, miR-2411, miR-2284m, miR-221-5p, miR-30b-3p, miR-299-3p, miR-320b, miR-655-5p, miR-323a-5p, miR-2404, miR-670-3p, miR-29a-3p, miR-2285ab, miR-18a-3p, miR-1291, miR-107, miR-19a-3p, miR-7975, miR-9851-3p, miR-6395, miR-135a-2-3p, novel\_101, miR-17-3p, miR-323c, miR-24-3p, miR-326-3p, miR-502-5p, let-7i, miR-203b-5p, miR-22-5p, miR-187-3p, miR-2284d, let-7g-5p, miR-103, miR-181a-5p, miR-1285, miR-374b-3p, miR-138, miR-29b, miR-30b-3p, miR-2284ab, miR-7862, miR-130b-5p, miR-2483-5p, miR-382, miR-363-5p, miR-654-3p, miR-296-3p, miR-345-5p, miR-466f-3p, miR-370-3p, miR-615-5p, miR-141-3p, miR-374c-3p, miR-769, miR-324-5p, miR-199a-5p, miR-381-3p, miR-2448-3p, miR-503-3p, miR-3154, miR-362-5p, let-7g-3p, miR-7144-5p, miR-3074-1-3p, miR-485-5p, miR-1306-5p, miR-500b-5p, miR-365a-5p, miR-29b-3p, miR-1-5p, miR-331-3p, miR-3969, miR-138-5p, miR-767-5p, miR-7641, miR-6516-5p, miR-2411-5p, miR-582-3p, miR-545-5p, miR-345-3p, miR-29d-3p, miR-411-3p, miR-6402, novel\_103, miR-1-5p, miR-1a-2-5p, miR-466i-5p, miR-212-3p, miR-1a-1-5p, miR-6240, miR-1b-5p, miR-216a-3p, miR-301, miR-27b-3p, miR-128-3p, miR-2426, miR-27a-3p, miR-27a-3p, miR-455-3p, miR-185-5p



miR-1343-5p, miR-466f-3p, miR-124-5p, miR-330-3p, miR-224-5p, miR-363-5p, miR-29b, miR-30b-3p, miR-544b, miR-2285g, miR-185-5p, miR-665, miR-130a-3p, miR-26b-3p, miR-133b-5p, miR-128-1-5p, miR-34c, miR-16a, miR-382-5p, miR-502-5p, miR-15a, miR-6402, miR-449a, miR-326-3p, miR-2428, miR-211, miR-323c, miR-3959-3p, miR-542-5p, miR-1193, novel\_101, miR-2285x, miR-6516-3p, miR-6395, miR-195a-5p, miR-135b-5p, miR-1291, miR-450b-3p, miR-19a-3p, miR-18a-3p, miR-2387, miR-323a-5p, miR-29a-3p, miR-670-3p, miR-34b, miR-320b, miR-450a-2-3p, miR-191-3p, miR-30c-2-3p, miR-2285af, miR-199a-5p, miR-3065-3p, miR-28b, miR-4286, miR-3529-3p, miR-128-3p, miR-300, miR-29d-3p, miR-30a-5p, miR-134, miR-214-5p, miR-2411-5p, miR-28-5p, miR-486b-3p, miR-204-5p, miR-331-3p, miR-135a-5p, miR-29b-3p, miR-370-5p, miR-10b-3p, miR-145-3p, miR-500b-5p, miR-323-3p, miR-190a-3p, miR-671-5p, miR-485-5p, miR-10b-3p, novel\_91, miR-320a, miR-362-5p, miR-3154, miR-381-3p, miR-199a-5p, miR-34c-5p, miR-598-3p, miR-1468, miR-542-5p, miR-3085-3p, miR-25-5p, miR-2957, miR-320b, miR-5126, novel\_103, miR-326, miR-758-3p, miR-30c-1-3p, miR-2330-5p, miR-424-5p, miR-544a, miR-450b-5p, miR-2426, miR-125b-2-3p, miR-30b-3p, miR-296-5p, miR-9788-3p, miR-216a-3p, miR-500-5p, miR-2285e, miR-5010-3p, novel\_4, miR-4726-5p, miR-2285y, miR-107-5p, miR-30b-5p, miR-362-5p, miR-541-3p, miR-877-3p, miR-129b-5p, miR-361-3p, miR-199b-5p, miR-489, miR-499b-5p, miR-7977, miR-3064-5p, miR-10b, miR-34b-5p, miR-30d, miR-30b-3p, miR-221-5p, miR-21-3p, miR-299-3p, miR-320d, miR-466i-5p, miR-185-3p, miR-542-5p, miR-2411, miR-29b-1-5p, miR-130a-5p, miR-125b-2-3p, miR-183-5p, miR-19b-3p, miR-4429, miR-2904, miR-1197-5p, miR-140-3p, miR-2300b-3p, miR-15a-5p, miR-148b-3p, miR-3600, miR-424-5p, miR-708-5p, miR-450b-3p, miR-664a, miR-155-5p, miR-324-3p, miR-320a, miR-191, miR-541, miR-412-3p, miR-16b, miR-497-5p, miR-412, miR-425-3p, miR-322-5p, miR-15a-5p, novel\_83, miR-411-5p, miR-16b, miR-183-5p, miR-424-5p, miR-2403, miR-130a-5p, miR-2387, miR-3970, miR-3154, miR-129b-5p, miR-10b-3p, miR-7144-5p, miR-671-5p, miR-195a-5p, novel\_68, miR-323a-5p, miR-323-5p, miR-15b-5p, miR-15a, miR-16a, miR-3968, miR-424-5p, miR-502b, miR-191-5p, miR-541-3p, miR-16-5p, miR-10b-3p, miR-18a-3p, miR-1197-5p, miR-331-3p, miR-197-5p, miR-125b-1-3p, miR-493-3p, novel\_127, miR-18a-3p, miR-3957-3p, miR-877-3p, miR-8485

SPEN

ENSOARGO(spen fam

SUMF1

ENSOARGO(sulfatas

PEA15

ENSOARGO(phosphop

miR-848b, miR-1b-5p, miR-758-3p, miR-1388-3p, miR-124a, miR-494-3p, miR-33a-5p, miR-491-5p, miR-3955-3p, miR-199b-5p, miR-214-3p, miR-103a-2-5p, miR-431-5p, miR-323b-3p, miR-29b-1-5p, miR-182-5p, miR-539-5p, miR-1298-3p, miR-9788-3p, miR-2285e, miR-151a-3p, miR-1343-3p, miR-1388-5p, miR-299a-5p, miR-450b-5p, miR-2426, miR-484, miR-143-5p, miR-412-3p, miR-323b, miR-758-3p, miR-154a, novel\_60, miR-3956-3p, miR-2285f, miR-219a-5p, miR-499a-5p, miR-2285t, miR-374a-3p, miR-30b-5p, novel\_82, miR-107-5p, miR-3082-5p, miR-489, miR-139-5p, miR-664b, miR-2319b, miR-20a-3p, miR-211-5p, miR-335-3p, novel\_94, miR-1983, miR-199b-5p, miR-409-5p, miR-129b-5p, miR-29b-1-5p, miR-376a-5p, miR-125b-2-3p, miR-376c-3p, miR-2432, miR-486-3p, miR-143-3p, miR-216c-5p, miR-105-3p, miR-99a-3p, miR-221-5p, miR-30d, miR-21-3p, miR-30b, miR-196a-3p, miR-219b-5p, miR-200b, miR-532-3p, miR-380-5p, miR-212-5p, miR-33b-3p, miR-16-1-3p, miR-361-5p, miR-378d, miR-30c-5p, miR-2366, miR-124-3p, miR-2904, miR-1197-5p, miR-217-5p, miR-6525, miR-224-5p, novel\_44, miR-346, miR-539-5p, miR-214, miR-664a, miR-17-3p, miR-487a-5p, miR-874-5p, miR-208b-5p, miR-30e-3p, miR-30a-3p, miR-151-3p, miR-29b-2-5p, miR-376e-3p, miR-6516, miR-193b-3p, miR-139-5p, miR-656-3p, miR-140-5p, miR-221-5p, miR-2331-3p, miR-660-5p, miR-182-5p, miR-532-5p, miR-2312, miR-30f, miR-18a-5p, miR-186-5p, miR-299, miR-2285c, miR-129b-3p, miR-30d-5p, miR-487b-5p, miR-2285r, miR-654-3p, miR-432-3p, miR-296-3p, miR-660, miR-466f-3p, miR-193a-3p, miR-224-5p, miR-296-3p, miR-412-5p, miR-2285g, miR-3431, miR-194-3p, miR-31-5p, miR-1260b, miR-16-1-3p, miR-653, miR-211, miR-199b-5p, miR-193b-3p, miR-758-5p, miR-17-3p, miR-495-3p, miR-2285x, novel\_1, miR-625-3p, miR-656-5p, miR-502-5p, miR-412-3p, miR-9851-3p, miR-2319a, miR-2285ab, miR-18b, miR-272b, miR-199a-5p, miR-190-3p, miR-3956-3p, miR-128-3p, miR-582-3p, miR-1343-5p, miR-330-5p, miR-129-1-3p, miR-505-5p, miR-1271-5p, miR-212-5p, novel\_17, miR-148b-5p, miR-2403, miR-1827, miR-2312, miR-345-5p, miR-345-5p, miR-362-5p, miR-3154, miR-204-3p, miR-2285aa, miR-370-5p, miR-182-5p, miR-4492, miR-370-5p, miR-5100, miR-1271, miR-6128, miR-214, miR-129-2-3p, miR-26a-2-3p, miR-3120-5p, miR-455-5p, miR-2284x, miR-30b-3p, miR-30b-3p, miR-500-5p, miR-149-5p, miR-216a-3p, miR-425-3p, miR-134-3p, miR-1343-5p, miR-214-3p, miR-455-5p, miR-182-5p, miR-326, miR-8485, miR-345-5p, miR-9851-3p, miR-96-5p, miR-216a-3p, miR-2285ab, miR-361-3p, miR-2387, miR-3596, miR-7857-3p, miR-378g, miR-7977, miR-20a-3p, miR-2319b, miR-203b-5p, miR-7134-3p, novel\_1, miR-1973, novel\_87, miR-326-3p, miR-361-3p, miR-877-3p, miR-362-5p, miR-24-3p, miR-371b-3p, miR-2285f, miR-1193, miR-2447

TRIML1 ENSOARGO(triparti

ALPL ENSOARGO(alkaline

miR-345-3p, miR-181b-1-3p, miR-380-3p, miR-374a-5p, miR-618, miR-320d, miR-30d-3p, miR-3600, miR-15a-5p, miR-383-5p, miR-7859, miR-4429, miR-19b-3p, miR-361-5p, miR-539-5p, miR-214, miR-142a-5p, miR-338-3p, miR-15b-3p, miR-2285j, miR-655-3p, miR-3604, miR-129-5p, miR-208b-5p, miR-548o-3p, miR-32-3p, miR-545-3p, miR-140-5p, miR-532-5p, miR-139-5p, miR-582-5p, miR-15b-5p, miR-2285c, miR-655, miR-598-3p, let-7g-3p, miR-2312, miR-582-5p, miR-625-5p, miR-424-5p, miR-101b-3p, miR-320b, miR-16b, miR-1185-5p, miR-214-3p, miR-548w, miR-105-1, miR-330-3p, miR-145b, miR-181b-2-3p, miR-142-5p, miR-1185-3p, miR-2285e, miR-500-5p, miR-450b-5p, miR-2426, miR-32-3p, miR-194b-5p, miR-2285f, miR-362-5p, miR-8095, miR-1285-5p, miR-2285n, miR-2285y, miR-499a-5p, miR-374a-3p, miR-139-5p, miR-541-5p, miR-2285u, miR-3082-5p, miR-1185-2-3p, miR-203-3p, miR-140-5p, miR-450b-5p, miR-2285b, miR-30f, miR-200a-3p, miR-107, miR-2285ad, miR-322-5p, miR-214-5p, miR-29d-3p, miR-411-3p, let-7a-2-3p, miR-105-2, miR-16-5p, miR-374a-3p, miR-2332, miR-29b-3p, miR-144, miR-374b-3p, miR-141-3p, miR-2285aa, miR-598-3p, miR-374c-3p, miR-320a, miR-362-5p, let-7g-3p, miR-6240, let-7f-2-3p, let-7f-2-3p, miR-2483-5p, miR-668-3p, miR-654-3p, let-7a-2-3p, let-7j, miR-194a, miR-105-5p, miR-330-3p, miR-103a-3p, miR-3955-5p, miR-2285g, miR-103, miR-223-3p, miR-194-5p, novel\_23, miR-145a-5p, miR-29b, miR-380-3p, miR-16b, miR-2284x, miR-188-5p, miR-497-5p, miR-29c-3p, novel\_101, miR-576-3p, miR-15a, miR-16a, miR-29a, miR-379-3p, miR-6119-3p, miR-3120-3p, miR-374c-3p, miR-29a-3p, miR-181b-3p, miR-144-3p, miR-677, miR-320c, miR-2285ab, miR-3970, miR-19a-3p, miR-107, miR-195a-5p

ZBTB10 ENSOARGO(zinc fin. miR-3154, miR-320a, miR-3074-1-3p, miR-329b, miR-345-5p, miR-345-5p, miR-10b-3p, miR-125a, miR-1271, miR-552-3p, miR-21-3p, miR-874-3p, miR-574-5p, miR-376c-3p, miR-22-3p, miR-193b-3p, miR-6130, miR-377-3p, miR-376e-3p, miR-320e, miR-125b-5p, miR-4492, miR-874-5p, novel\_74, miR-214, miR-4510, miR-145-3p, miR-1197-3p, miR-6525, miR-5703, miR-330-5p, miR-1343-5p, miR-1290, miR-4429, miR-18a-3p, miR-2285ad, miR-185-3p, miR-125b, miR-219b-5p, miR-664-3p, novel\_17, miR-543-5p, novel\_127, novel\_96, miR-466i-5p, miR-2898, miR-320d, miR-329a-5p, miR-376c-3p, miR-376a-5p, miR-3591-3p, miR-18a-3p, novel\_94, miR-7975, miR-147-3p, miR-450b-3p, miR-7977, miR-320b, miR-2285u, miR-329-5p, miR-10b, miR-20a-3p, miR-664b, miR-203-3p, miR-320c, miR-670-3p, miR-2285y, miR-4324, miR-2285n, miR-656-5p, miR-193b-3p, miR-3059-5p, miR-326-3p, novel\_27, miR-24-3p, miR-323b, miR-22-3p, miR-197-3p, miR-7b-5p, miR-2889, miR-188-5p, miR-450b-5p, miR-1388-5p, miR-26b-3p, miR-5010-3p, miR-31-5p, miR-187-3p, miR-147a, miR-185-5p, miR-3431, novel\_51, miR-323b-3p, miR-377-3p, miR-326, miR-7-5p, miR-320b, miR-193a-3p, miR-214-3p, miR-1343-5p, miR-125a-5p, miR-491-5p, miR-124-5p, miR-33a-5p, miR-363-5p, miR-1388-3p, miR-345-5p, miR-3187-3p

CD177 ENSOARGO(CD177 mo

miR-6240, miR-345-5p, miR-1957a, novel\_39, miR-432-3p, miR-432-3p, miR-664b-3p, miR-2411-3p, miR-345-3p, miR-197-5p, miR-193a-3p, miR-124-5p, miR-17-3p, miR-1343-3p, miR-214-5p, miR-9788-3p, miR-455-3p, miR-758-5p, miR-3535, miR-5703, miR-3071-5p, miR-4791, miR-345-3p, miR-378d, miR-2330-3p, miR-17-3p, miR-193b-3p, miR-3184-3p, miR-1306-5p, miR-376a-3p, miR-2447, novel\_27, miR-3969, miR-409-3p, miR-6740-5p, miR-2440, miR-6402, miR-142b, miR-382-3p, miR-502-5p, miR-421-5p, miR-490-5p, miR-6516-3p, miR-17-3p, miR-21-3p, miR-216b-3p, miR-504-5p, miR-204-3p, miR-193b-3p, miR-216b-5p, miR-3154, miR-150-5p, miR-488-3p, miR-379-5p, miR-186-5p, miR-504, miR-345-5p, miR-345-5p

miR-320b, miR-182-5p, miR-2331-5p, miR-105-5p, miR-483-3p, miR-378a-5p, miR-214-3p, let-7e, miR-493-5p, let-7a-5p, miR-30c-1-3p, let-7a-2-3p, miR-3187-3p, miR-2113, miR-1434-3p, miR-484, miR-544a, miR-1839-5p, miR-2300a-5p, miR-105-1, miR-181b-2-3p, let-7g-5p, miR-185-5p, miR-1298-3p, miR-3535, miR-544b, miR-148b-5p, miR-142b, let-7i, miR-6123, miR-203b-5p, miR-3059-5p, miR-877-3p, miR-668-5p, let-7e-5p, miR-376a-2-5p, miR-493-5p, miR-489, miR-181b-3p, miR-454-5p, let-7d-5p, miR-320c, miR-677, let-7c-5p, miR-500a-5p, miR-30c-2-3p, miR-127-5p, miR-200c-3p, let-7f-5p, miR-98-5p, miR-320d, let-7k, miR-221-5p, miR-216c-5p, miR-2385-3p, miR-181b-1-3p, miR-376a-5p, miR-490-3p, let-7g, miR-1961, miR-140-3p, miR-4429, let-7d, miR-493-3p, miR-148a-5p, let-7a-2-3p, miR-105-2, miR-376a-5p, miR-212-5p, miR-483-3p, miR-7859, miR-671-3p, let-7f, miR-331-3p, miR-100-3p, novel\_74, miR-4510, miR-3184-3p, miR-590-3p, let-7b, miR-214, miR-6128, miR-3607-3p, miR-193a-5p, miR-6134, let-7b-5p, miR-320a, miR-129b-3p, let-7g-3p, let-7g-3p, miR-10b-3p, miR-1248, miR-3074-1-3p, miR-30c-1-3p, miR-221-5p, miR-182-5p, miR-365a-3p, miR-6130, miR-544-3p, let-7i-5p

MRPS30 ENSOARGO(mitochon

PIK3AP1 ENSOARGO(phosphoi

let-7b, miR-3074-5p, miR-769-5p, miR-652b, miR-30a-3p, miR-665, let-7f, miR-2285j, miR-30e-3p, miR-874-5p, miR-4492, novel\_74, miR-216b-3p, miR-2331-3p, let-7i-5p, miR-2284s, miR-129b-3p, miR-655, miR-2285c, miR-625-5p, miR-1827, miR-2285w, miR-2424, miR-143-3p, miR-377-5p, miR-210-5p, let-7k, miR-98-5p, miR-30d-3p, miR-2284h-5p, miR-7859, miR-95-3p, miR-1434-5p, miR-1961, miR-193b-5p, miR-2366, miR-16-1-3p, miR-218-1-3p, miR-34a-5p, miR-493-3p, miR-142-3p, miR-9-5p, miR-2447, miR-361-3p, novel\_111, miR-7689-3p, miR-139-5p, miR-1185-2-3p, miR-25, miR-3596, miR-221, miR-1983, miR-744-3p, miR-124a, miR-101b-3p, miR-323b-3p, miR-29b-1-5p, miR-153-3p, miR-491-5p, miR-145b, miR-1343-3p, miR-199b-3p, miR-1185-3p, miR-153, miR-147a, miR-323b, miR-2284r, miR-193a-5p, miR-28a-3p, novel\_42, miR-1197-3p, miR-2355-5p, miR-2285aa, miR-503-3p, miR-137-3p, miR-301, miR-1248, let-7g, miR-664-3p, novel\_96, miR-200a-3p, miR-28-3p, let-7f-5p, miR-412, miR-2285ad, miR-6517, miR-9-5p, miR-758-5p, miR-330-5p, miR-1839-3p, miR-29c-3p, miR-374c-5p, miR-6123, miR-29a, miR-3074-5p, miR-669, miR-374c-3p, miR-1306, miR-3591-3p, let-7e-5p, miR-412-3p, let-7f-2-3p, let-7f-2-3p, miR-628-5p, let-7j, miR-432-3p, miR-105-5p, miR-365b-5p, miR-7-5p, miR-3955-5p, miR-194-3p, novel\_116, miR-412-5p, miR-197-3p, miR-432, miR-708-3p, miR-1843b-5p, miR-542-3p, miR-7b-5p, miR-16-1-3p, miR-3074-2-3p, miR-4510, let-7b-5p, miR-338-3p, miR-324-3p, miR-132-5p, miR-655-3p, miR-320e, miR-222-3p, miR-708-5p, miR-17-3p, miR-21-3p, miR-496-3p, miR-204-3p, novel\_32, miR-544-3p, miR-6130, miR-139-5p, miR-2312, miR-216c-5p, miR-2432, miR-29b-1-5p, miR-216a-5p, miR-185-3p, miR-542-5p, miR-34b-5p, miR-466i-5p, miR-532-3p, miR-124-3p, miR-5703, miR-1197-5p, miR-140-3p, novel\_133, miR-19b-3p, miR-2285f, miR-219a-5p, miR-8095, miR-2285v, miR-769-5p, miR-371a-

MCM9

ENSOARGO(minichro

miR-7641, miR-2285ad, miR-134-5p, miR-2284z, miR-330-5p, miR-1343-5p, miR-1290, miR-134, miR-345-3p, let-7a-2-3p, miR-128-3p, let-7d, miR-885-3p, miR-30a-3p, miR-3064-5p, novel\_39, let-7g, miR-2478, let-7c-5p, miR-30f, miR-219-3p, miR-200a-3p, let-7f-5p, miR-141-3p, miR-598-3p, miR-2355-5p, miR-487a-3p, miR-331-5p, miR-3154, miR-23b, miR-362-5p, let-7g-3p, miR-3607-3p, miR-365a-5p, miR-374a-3p, miR-500b-5p, miR-144, miR-6740-5p, miR-2332, novel\_63, miR-486b-3p, miR-374b-3p, miR-134-5p, miR-187-3p, miR-31-5p, miR-2355-3p, let-7g-5p, miR-2285g, miR-432-5p, novel\_23, miR-22-3p, miR-542-3p, miR-1434-3p, miR-653, miR-432, miR-27b-3p, miR-2284x, miR-16-1-3p, miR-219a-1-3p, miR-30b-3p, miR-363-5p, miR-493-5p, let-7a-2-3p, miR-432-3p, miR-432-3p, miR-2411-3p, miR-365b-5p, miR-377-3p, miR-1343-5p, miR-144-3p, miR-374c-3p, miR-670-3p, miR-216a-3p, miR-2285ab, let-7e-5p, miR-505-3p, miR-495-3p, miR-2285x, miR-2428, miR-326-3p, miR-3959-3p, miR-382-5p, let-7i, miR-502-5p, miR-656-5p, miR-203b-5p, miR-6119-3p, miR-30d-3p, miR-505-3p, miR-616-3p, miR-1247-5p, miR-23c, miR-340-5p, miR-23b-3p, miR-383-5p, miR-5703, miR-140-3p, miR-124-3p, miR-1961, miR-16-1-3p, novel\_73, miR-493-3p, miR-345-3p, miR-487a, miR-216c-5p, miR-486-3p, miR-2424, miR-2432, miR-345-3p, miR-185-3p, miR-500a-5p, miR-21-3p, let-7k, miR-98-5p, miR-154a-3p, let-7i-5p, miR-22-3p, miR-377-3p, miR-598-3p, miR-2285c, miR-885-3p, miR-154b-3p, miR-2312, let-7g-3p, miR-214, miR-665-5p, miR-425-5p, let-7b, let-7b-5p, miR-3184-5p, miR-30a-3p, miR-219b-3p, miR-30e-3p, miR-15b-3p, let-7f, miR-208b-5p, miR-4492, novel\_74, miR-27a-3p, miR-409b, miR-2285e, miR-9788-3p, miR-500-5p, miR-539-5p, miR-30b-3p, miR-484, miR-2284aa, miR-2426, miR-23a-3p, miR-1388-3p, let-7a-5p, miR-124a, miR-326, let-7e, miR-214-3p, miR-3955-3p, miR-3085-3p, miR-1185-5p, miR-2319b, miR-3064-5p, miR-27a-3p, let-

miR-429-3p, miR-7641, miR-1224-5p, miR-6516-5p, miR-483-3p, miR-378h, miR-322-5p, miR-3591-5p, miR-330-5p, miR-2427, miR-300, miR-128-3p, miR-200b-3p, miR-99a-5p, miR-181a-2-3p, miR-495-5p, miR-30a-3p, miR-2385-3p, miR-92b-3p, miR-2285b, miR-199a-5p, miR-1957a, miR-664-3p, miR-99a, miR-200c, miR-1260a, miR-217, miR-3071-3p, miR-200c-3p, miR-200a-3p, miR-92a-3p, miR-141-3p, miR-25-3p, miR-154b-5p, miR-199a-5p, miR-381-3p, miR-488-3p, miR-3154, miR-100-5p, miR-345-5p, miR-1814c, miR-1248, miR-7144-5p, miR-16-5p, miR-1260b, miR-1197-3p, miR-378c, novel\_63, miR-135a-5p, miR-409-3p, miR-138-5p, miR-592, miR-486b-3p, miR-1285, miR-1434-3p, miR-542-3p, miR-16-1-3p, miR-1260b, miR-16b, miR-138, miR-497-5p, miR-130b-5p, miR-2285r, miR-345-5p, miR-146a, miR-99a-5p, novel\_51, miR-32, miR-2285l, miR-483-3p, miR-106b-3p, novel\_68, miR-3120-3p, miR-655-5p, miR-320b, miR-2404, miR-181b-3p, miR-677, miR-669, miR-2387, miR-216a-3p, miR-150-5p, miR-505-3p, miR-378f, miR-195a-5p, miR-135b-5p, miR-146b-5p, miR-219b-3p, miR-2285x, miR-199b-5p, novel\_27, miR-326-3p, miR-576-3p, miR-15a, miR-33a-3p, miR-382-5p, miR-16a, novel\_1, miR-92a-3p, miR-147-5p, miR-421-5p, miR-30d-3p, miR-505-3p, miR-200b, miR-15a-5p, miR-2284h-5p, miR-532-3p, miR-378i, miR-378a-3p, miR-1197-5p, miR-140-3p, miR-217-5p, miR-378d, miR-218-1-3p, miR-16-1-3p, miR-2285w, miR-183-5p, miR-181b-1-3p, miR-125b-2-3p, miR-29b-1-5p, miR-143-3p, miR-486-3p, miR-146a-5p, miR-2285p, miR-618, miR-422a, miR-760-3p, miR-221-5p, miR-3653-3p, miR-32-3p, miR-221-5p, miR-504-5p, miR-32-5p, miR-378a-3p, miR-2331-3p, miR-296-3p, miR-552-3p, miR-6130, miR-582-5p, miR-6516, miR-15b-5p, miR-877-5p, novel\_25, miR-21a-3p, miR-345-5p, miR-582-5p, miR-543-3p, miR-145a-3p, miR-4510, miR-433-5p, miR-378c, miR-30e-3p, miR-2285i, miR-15b-3p, miR-220a, miR-20a-3p, miR-130b-let-7i, miR-301a-5p, miR-142b, novel\_82, miR-199c, miR-656-5p, miR-206, miR-190b-5p, miR-181d-5p, miR-301b-3p, novel\_27, miR-18a-3p, miR-140-5p, miR-135b-5p, let-7e-5p, miR-136-5p, miR-329-5p, miR-664b, miR-181b-3p, miR-27a-3p, miR-203-3p, miR-677, miR-144-3p, let-7d-5p, miR-499a-3p, miR-2404, miR-2411-3p, miR-190a, miR-199a-3p, let-7e, miR-130b-3p, miR-2483-5p, miR-2330-5p, let-7a-5p, miR-380-5p, miR-1a-3p, miR-301b-5p, miR-181a-5p, miR-3120-5p, miR-27b-3p, miR-21b, miR-450b-5p, miR-219a-1-3p, miR-1388-5p, miR-181b-2-3p, miR-27a-3p, miR-199b-3p, miR-149-5p, miR-216a-3p, miR-455-3p, let-7g-5p, miR-142-5p, miR-29b-2-5p, miR-135a-5p, miR-30a-3p, miR-144, miR-30e-3p, let-7f, miR-190a-5p, miR-454-3p, miR-3074-2-3p, miR-6128, let-7b, miR-181c-5p, let-7b-5p, miR-206-3p, miR-142a-5p, miR-2448-3p, novel\_99, miR-582-5p, miR-485-5p, miR-625-5p, miR-2318, miR-140-5p, let-7i-5p, miR-301a-3p, miR-499b-3p, miR-582-5p, miR-345-3p, miR-217, let-7c-5p, miR-664-3p, miR-618, novel\_127, miR-543-5p, let-7k, miR-181b-5p, miR-98-5p, let-7f-5p, miR-181a-2-3p, miR-29b-2-5p, miR-1, miR-30a-3p, miR-329a-5p, miR-1271-3p, let-7g, miR-181b-1-3p, miR-380-5p, miR-217-5p, miR-188-3p, miR-140-3p, miR-1961, miR-1246, miR-345-3p, let-7d, miR-30d-3p, miR-212-5p, miR-18a-3p, miR-548e-3p, miR-199a-3p, miR-616-3p, miR-545-5p, miR-758-5p, miR-7859

E2F1 ENSOARGO(E2F tran miR-370-5p, miR-331-3p, miR-378c, miR-6128, miR-193a-5p, miR-10b-3p, miR-329a, miR-424-3p, miR-199a-5p, miR-542-5p, miR-1271, miR-2898, miR-127-5p, miR-200c-3p, let-7f-5p, novel\_127, miR-200c, let-7c-5p, miR-148b-5p, let-7g, miR-199a-5p, miR-2284a, let-7d, miR-200b-3p, miR-3591-5p, miR-483-3p, miR-758-5p, miR-378h, miR-2411-5p, miR-429-3p, miR-6517, miR-412, miR-128-1-5p, miR-656-5p, let-7i, miR-24-3p, miR-199b-5p, miR-1193, miR-1291, miR-7975, miR-378f, let-7e-5p, miR-1306, miR-18a-3p, novel\_69, miR-655-5p, miR-320b, miR-378a-5p, miR-483-3p, miR-2285l, miR-296-3p, miR-432-3p, miR-296-3p, miR-130b-5p, miR-432, miR-1843b-5p, miR-22-3p, miR-432-5p, let-7g-5p, miR-31-5p, miR-4492, miR-129-5p, miR-130b-5p, let-7b-3p, let-7f, miR-132-5p, miR-98-3p, let-7b-5p, miR-3184-5p, let-7b, miR-378c, miR-4510, miR-665-5p, miR-1827, let-7f-1-3p, miR-2284s, miR-216b-5p, miR-6130, miR-22-3p, let-7i-5p, miR-151b, miR-140-5p, miR-221-5p, miR-378a-3p, miR-370-5p, miR-296-3p, miR-466i-5p, miR-98-5p, miR-221-5p, let-7k, miR-618, miR-324-3p, miR-92a-1-5p, miR-422a, miR-185-3p, miR-376a-5p, miR-29b-1-5p, miR-130a-5p, miR-2424, miR-2411, miR-493-3p, miR-941, let-7a-3p, miR-148a-5p, miR-378i, miR-362-3p, miR-1961, miR-98-3p, miR-378a-3p, miR-188-3p, miR-200b, miR-532-3p, miR-151-5p, miR-18a-3p, novel\_111, miR-423-5p, miR-877-3p, miR-199b-5p, miR-381-3p, miR-378e, miR-7857-3p, let-7d-5p, miR-126b-5p, miR-199b-5p, let-7e, miR-1306-5p, miR-29b-1-5p, miR-362-3p, miR-378d, miR-4532, miR-1388-3p, let-7a-5p, miR-2284b, miR-362-3p, miR-378c, miR-101a-5p, miR-329-3p, miR-296-5p, miR-378b, miR-412-3p, miR-147a, miR-455-3p, miR-148b-5p, novel\_4



miR-2284w, novel\_27, miR-29c-3p, miR-17-3p, miR-1193, miR-502b, miR-22-5p, miR-29a, miR-33a-3p, miR-142b, miR-181b-3p, miR-320c, miR-677, miR-29a-3p, miR-3120-3p, miR-655-5p, novel\_68, miR-107, miR-378b, miR-21c, miR-1306, miR-148a-3p, miR-2387, miR-345-5p, let-7a-2-3p, miR-2284l, miR-654-3p, miR-432-3p, miR-668-3p, miR-493-5p, miR-452-5p, novel\_51, miR-2411-3p, miR-103, miR-149-5p, miR-3431, miR-2284d, miR-103a-3p, miR-31-5p, miR-26a-2-3p, miR-1260b, miR-219a-1-3p, miR-21-5p, miR-29b, miR-30b-3p, miR-2284ab, novel\_23, miR-3071-5p, miR-2113, miR-19b-2-5p, miR-145-3p, miR-1260b, miR-1197-3p, miR-144-5p, miR-6128, miR-3607-3p, miR-2284v, miR-1306-5p, miR-592, miR-3969, miR-5100, miR-370-5p, miR-2284k, miR-29b-3p, miR-2284n, miR-133c, miR-223-5p, miR-3068-3p, miR-1248, miR-7144-5p, miR-345-5p, let-7g-3p, miR-23b, miR-320a, miR-3154, miR-192-3p, miR-2285b, miR-2284a, novel\_39, miR-200a, miR-29a-5p, miR-2284y, miR-3529-3p, miR-152-3p, miR-543-5p, miR-107, miR-127-5p, miR-200c-3p, miR-17-3p, miR-217, miR-664-3p, miR-200c, miR-1260a, miR-2285af, miR-486-5p, novel\_121, miR-2284z, miR-758-5p, miR-7641, miR-429-3p, miR-222, let-7a-2-3p, miR-200b-3p, miR-29d-3p, miR-3578, miR-345-3p, miR-1285-5p, miR-8095, miR-877-3p, miR-2284j, miR-3956-3p, miR-3059-5p, novel\_60, miR-2447, miR-154-3p, miR-107-5p, miR-203-3p, miR-144-5p, miR-3082-5p, miR-2483-3p, miR-541-5p, miR-2319b, miR-20a-3p, miR-2284g, miR-664b, novel\_94, miR-335-3p, miR-493-5p, miR-136-5p, miR-129b-5p, miR-221, miR-140-5p, miR-491-3p, miR-3187-3p, miR-33a-5p, miR-23a-3p, let-7c-3p, miR-103a-2-5p, miR-1306-5p, miR-320b, miR-199a-3p, miR-126a-5p, miR-221-3p, miR-9788-3p, miR-455-3p, miR-181b-2-3p, miR-5010-3p, miR-1343-3p, miR-548w, miR-2284aa, miR-16-2-3p, miR-450b-5p, miR-30b-3p, miR-143-5p, miR-3071-2-3p, miR-

miR-146a, miR-7-5p, miR-2411-3p, miR-493-5p, miR-2285r, miR-503-3p, let-7a-2-3p, miR-7b-5p, miR-542-3p, miR-19b-2-5p, miR-432, miR-197-3p, miR-16-1-3p, miR-16b, miR-369-5p, miR-497-5p, miR-3955-5p, miR-31-5p, miR-339-5p, miR-134-3p, miR-3431, novel\_116, miR-142b, miR-29a, miR-29c-3p, miR-376b-5p, miR-3591-3p, miR-3970, miR-410-5p, miR-378f, miR-146b-5p, miR-2319a, miR-3074-5p, miR-669, miR-6536, miR-3064-5p, miR-29a-5p, miR-3591-5p, miR-23b-5p, miR-429-3p, miR-6517, novel\_79, miR-412, miR-322-5p, miR-9-5p, miR-193a-5p, miR-16-5p, miR-1197-3p, miR-181c-3p, miR-301, miR-376c-5p, miR-200a-5p, miR-767, miR-1248, miR-874-3p, miR-331-5p, miR-300-3p, miR-376c-3p, miR-182-5p, miR-16b, miR-29b-1-5p, novel\_19, miR-103a-2-5p, miR-146b, miR-378d, miR-1b-5p, miR-501-3p, miR-1839-5p, miR-21b, miR-1343-3p, miR-548w, miR-421, miR-455-3p, miR-2440, miR-218-5p, miR-499a-5p, miR-2447, miR-9-5p, miR-2284j, miR-877-3p, miR-140-5p, miR-136-5p, miR-96-5p, miR-299b-5p, miR-181a-3p, miR-493-5p, miR-2319b, miR-139-5p, miR-2483-3p, miR-378g, miR-500-3p, miR-422a, miR-345-3p, miR-324-3p, miR-202-5p, miR-2285w, miR-376a-5p, miR-378i, miR-378a-3p, miR-33b-3p, miR-34a-5p, miR-16-1-3p, miR-30d-3p, miR-212-5p, miR-2284h-5p, miR-665, miR-30a-3p, miR-130b-5p, miR-3074-5p, miR-3184-3p, miR-665-5p, miR-3958-5p, novel\_44, miR-346, miR-6525, miR-339b, miR-1827, miR-543-3p, miR-216b-5p, miR-582-5p, miR-15b-5p, miR-136-3p, miR-2285l, miR-130b-5p, miR-363-5p, miR-654-3p, miR-374b-3p, miR-29b, miR-21-5p, miR-30b-3p, miR-7862, miR-133b-5p, miR-26b-3p, miR-432-5p, miR-2355-3p, miR-544b, miR-6402, miR-133a-5p, miR-6529b, miR-502-5p, miR-15a, miR-382-5p, miR-34c, miR-16a, novel\_1, miR-656-5p, miR-203b-5p, miR-22-5p, novel\_101, miR-495-3p, miR-17-3p, miR-24-3p, miR-149a, novel\_27, miR-378b, miR-21c, miR-505-3p, miR-195a, miR-381-3p, miR-21c, miR-18a-3p, miR-148a-3p, miR-1291, miR-27a-3p, miR-320c, miR-323a-5p, miR-301a-5p, miR-33a-3p, miR-371a-5p, miR-28c, miR-2284q, miR-374a-3p, miR-4726-5p, miR-499a-5p, miR-2428, novel\_111, miR-301b-5p, miR-708-3p, miR-296-5p, miR-27b-3p, miR-455-5p, miR-2426, miR-21-5p, miR-27a-3p, miR-31-5p, miR-503-5p, miR-185-5p, miR-455-5p, miR-320b, miR-503-5p, miR-124-5p, miR-320a, miR-27b-5p, miR-216b-3p, miR-3965, miR-323-5p, miR-320e, miR-2433, miR-486b-3p, miR-374b-3p, miR-28-5p, miR-708-5p, miR-4492, novel\_74, miR-28a-3p, miR-6134, miR-374a-3p, novel\_44, miR-98-3p, miR-1197-3p, miR-188-3p, miR-5703, miR-98-3p, miR-376a-5p, miR-4429, miR-18a-3p, miR-148b-3p, miR-185-3p, miR-219b-5p, miR-2285af, novel\_127, miR-152-3p, miR-2898, miR-320d, miR-28-3p, miR-503-5p, miR-486-3p, miR-28b

SLC25A33 ENSOARGO(solute c

LYPD3 ENSOARGO(LY6/PLAU

miR-2300a-5p, miR-2285e, miR-30b-3p, miR-7857, miR-143-5p, miR-484, miR-6529a, miR-378b, miR-378c, let-7c-3p, miR-2330-5p, miR-424-5p, let-7a-5p, miR-3187-3p, miR-30c-1-3p, miR-362-3p, novel\_103, miR-1306-5p, let-7e, miR-25-5p, miR-3085-3p, miR-7977, miR-499b-5p, miR-452-3p, miR-3064-5p, let-7d-5p, miR-3082-5p, miR-378e, miR-361-3p, miR-2285f, miR-541-3p, novel\_60, miR-371a-5p, miR-3958-3p, miR-4726-5p, miR-3600, miR-532-3p, miR-15a-5p, miR-1197-5p, miR-2904, miR-362-3p, novel\_133, miR-2411, miR-125b, miR-185-3p, miR-34b-5p, miR-221-5p, miR-466i-5p, miR-370-5p, miR-3065-3p, miR-221-5p, miR-378a-3p, miR-22-3p, novel\_32, miR-204-3p, miR-6130, miR-27a-5p, miR-18a-5p, miR-2312, let-7g-3p, miR-3074-2-3p, miR-145a-3p, miR-4510, miR-378c, let-7b-5p, miR-320e, miR-324-3p, miR-708-5p, miR-17-3p, miR-665, let-7g-5p, miR-2285g, miR-432-5p, miR-1285, miR-744-5p, miR-2889, miR-29b, miR-30b-3p, miR-6412, miR-197-5p, miR-224-5p, miR-466f-3p, miR-125a-5p, miR-320b, miR-34b, miR-670-3p, miR-29a-3p, miR-146b-3p, miR-18a-3p, miR-18b, miR-2285ab, miR-195a-5p, miR-6395, miR-9851-3p, miR-450b-3p, miR-1291, miR-17-3p, miR-1193, miR-3957-3p, miR-2428, miR-449a, miR-24-3p, let-7i, miR-34c, miR-16a, miR-15a, miR-147-5p, miR-203b-5p, miR-656-5p, miR-128-1-5p, miR-2411-5p, miR-378h, miR-29d-3p, let-7d, miR-582-3p, miR-181a-2-3p, miR-4286, miR-1271-3p, miR-1957a, miR-3065-3p, miR-28b, let-7c-5p, miR-339a, miR-30c-2-3p, miR-543-5p, miR-17-3p, miR-2898, miR-615-5p, miR-370-3p, miR-34c-5p, miR-3154, miR-18a, miR-485-5p, miR-7144-5p, miR-378c, miR-99b-3p, miR-370-5p, miR-29b-3p, miR-486b-3p, miR-28-5p, miR-410-3p, miR-1343-3p, miR-455-3p, miR-147a, miR-301b-5p, miR-541, miR-329-3p, miR-362-3p, miR-1388-3p, miR-8485, miR-378d, miR-16b, miR-214-3p, miR-381-5p, miR-2319b, miR-4443, miR-1983, miR-504, miR-3956-3p, miR-2447, miR-193-

CNGA2 ENSOARGO(cyclic n miR-466i-5p, miR-299-3p, miR-21-3p, miR-2484, miR-26a-5p, miR-345-3p, miR-185-3p, miR-92a-1-5p, miR-216a-5p, miR-377-5p, miR-376a-5p, miR-2411, novel\_133, miR-140-3p, miR-616-3p, miR-532-3p, miR-30d-3p, miR-664a, miR-130b-5p, miR-30e-3p, miR-665, miR-30a-3p, miR-324-3p, miR-206-3p, miR-4510, miR-3184-3p, miR-129-2-3p, miR-539-5p, miR-3074-2-3p, miR-214, miR-665-5p, miR-3958-5p, let-7g-3p, miR-129b-3p, miR-6130, miR-27a-5p, miR-548o-3p, miR-30c-1-3p, miR-296-3p, miR-216b-3p, miR-491-5p, miR-214-3p, miR-153-3p, miR-199b-5p, miR-326, miR-1306-5p, miR-342, miR-30c-1-3p, miR-1839-3p, miR-4791, miR-30b-3p, miR-1a-3p, miR-153, miR-2459, miR-216a-3p, novel\_4, miR-450a-5p, miR-615, miR-2440, miR-101-3p, miR-371a-5p, novel\_111, miR-1983, miR-199b-5p, miR-378g, miR-4443, miR-7689-3p, miR-127-5p, novel\_96, miR-6119-5p, miR-2285af, miR-30f, miR-30c-2-3p, miR-450c-5p, miR-200a, miR-376b-5p, novel\_39, miR-199a-5p, miR-376c-5p, miR-3529-3p, miR-1, miR-128-3p, miR-615-3p, miR-345-3p, miR-330-5p, miR-2411-5p, miR-758-5p, novel\_121, miR-486-5p, miR-129-1-3p, miR-6517, miR-299a-3p, miR-331-5p, miR-138-5p, miR-144, miR-331-3p, miR-1197-3p, miR-193a-5p, novel\_91, miR-10b-3p, miR-671-5p, miR-7144-5p, miR-331-5p, miR-3965, miR-300-3p, miR-331-5p, miR-199a-5p, miR-874-3p, miR-1271, miR-370-3p, miR-2355-5p, miR-378a-5p, miR-2411-3p, novel\_51, miR-105-5p, miR-130b-5p, miR-363-5p, miR-30b-3p, miR-138, miR-542-3p, miR-2113, miR-432, miR-873a-5p, miR-197-3p, miR-134-3p, miR-3535, miR-432-5p, miR-377-5p, miR-665, miR-206, miR-502b, miR-6123, miR-22-5p, miR-4324, miR-2428, miR-199b-5p, miR-326-3p, miR-219b-3p, miR-342-3p, miR-1839-3p, miR-412-3p, miR-1291, miR-410-5p, miR-216a-3p, miR-3970, miR-1306, miR-150-5p, miR-299b-3p, miR-670-3p, miR-144-3p, miR-3120-3p, miR-26b-5p

miR-1814c, miR-671-5p, miR-376c-5p, miR-10b-3p, miR-18a, miR-320a, miR-154b-5p, miR-34c-5p, miR-374c-3p, miR-28-5p, miR-138-5p, miR-331-3p, miR-370-5p, miR-365a-5p, miR-374a-3p, miR-200b-3p, miR-105-2, miR-501-3p, miR-218-2-3p, miR-345-3p, miR-302a-5p, miR-222, miR-200c-3p, miR-17-3p, miR-339a, miR-30c-2-3p, miR-200c, miR-6119-5p, miR-376b-3p, miR-2284a, miR-181a-2-3p, miR-29b-2-5p, miR-30a-3p, miR-3529-3p, miR-505-3p, miR-6395, miR-195a-5p, miR-376b-3p, miR-18b, miR-670-3p, miR-34b, miR-323a-5p, miR-2404, miR-22-5p, novel\_1, miR-34c, miR-16a, miR-133a-5p, miR-15a, miR-449a, miR-17-3p, novel\_101, miR-1193, miR-495-3p, miR-2285x, miR-3957-3p, miR-219a-1-3p, miR-30b-3p, miR-138, miR-374b-3p, miR-653, miR-2355-3p, miR-2284d, miR-466f-3p, miR-1343-5p, miR-330-3p, miR-224-5p, miR-296-3p, miR-582-5p, novel\_99, miR-18a-5p, miR-27b-5p, miR-21a-3p, novel\_25, miR-22-3p, miR-204-3p, miR-656-3p, miR-323-5p, miR-182-5p, miR-532-5p, miR-370-5p, miR-221-5p, miR-545-3p, miR-424-5p, miR-708-5p, miR-17-3p, miR-29b-2-5p, miR-320e, miR-324-3p, miR-19b-1-5p, miR-222-3p, miR-338-3p, miR-2330-3p, miR-3074-2-3p, miR-145a-3p, miR-539-5p, miR-4429, miR-5703, miR-2904, miR-15a-5p, miR-200b, miR-505-3p, miR-3600, miR-34b-5p, miR-30b-3p, miR-221-5p, miR-320d, miR-196a-3p, miR-146a-5p, miR-130a-5p, miR-216c-5p, miR-376d, miR-27a-3p, miR-3082-5p, miR-7857-3p, miR-541-5p, miR-499b-5p, miR-20a-3p, miR-3064-5p, miR-2285t, miR-374a-3p, miR-450a-5p, miR-2285y, miR-2285n, miR-502-3p, miR-452-5p, miR-219a-5p, miR-541-3p, miR-3059-5p, miR-2284aa, miR-101a-5p, miR-30b-3p, miR-7857, miR-4791, miR-484, miR-296-5p, miR-221-3p, miR-142-3p, miR-27a-3p, miR-105-1, miR-3085-3p, novel\_103, miR-320b, miR-193a, miR-3187-3p, miR-30c-1-3p, miR-33a-5p, miR-424-5p, miR-494-3p, miR-329b, miR-23b, miR-376c-5p, miR-2285aa, novel\_9, miR-2284k, miR-25-5p, miR-125a-5p, miR-660, miR-503-5p, novel\_103, miR-182-5p, miR-345-5p, miR-1388-3p, miR-130b-5p, miR-2483-5p, miR-1260b, miR-219a-1-3p, miR-16-2-3p, miR-1843b-5p, miR-22-3p, miR-496-5p, miR-503-5p, miR-149-5p, miR-2355-3p, miR-31-5p, miR-133b-5p, miR-628-3p, miR-128-1-5p, miR-335, novel\_1, miR-502-5p, miR-4324, miR-211, miR-335-5p, miR-17-3p, miR-877-3p, miR-18b, miR-378b, miR-2483-3p, miR-454-5p, miR-4443, novel\_68, miR-7689-3p, miR-211-5p, miR-3120-3p, miR-17-3p, miR-760-3p, miR-21-3p, miR-1260a, novel\_17, miR-3071-3p, miR-125b, miR-148b-5p, miR-2432, miR-503-5p, miR-195a-3p, miR-134, miR-5703, miR-505-5p, miR-134-5p, miR-582-3p, miR-129-1-3p, miR-3600, miR-18b-5p, miR-17-3p, miR-874-5p, miR-134-5p, miR-204-5p, miR-130b-5p, miR-2433, miR-125b-5p, miR-1260b, miR-539-5p, miR-129-2-3p, miR-3607-3p, miR-6128, miR-345-5p, miR-18a-5p, miR-345-5p, miR-7144-5p, miR-485-5p, miR-21a-3p, miR-18a, miR-3959-5p, miR-22-3p, miR-154b-5p, miR-660-5p, miR-182-5p, miR-125a, miR-3065-3p, miR-877-3p, miR-29c-3p, miR-6240, miR-3074-5p, miR-29a, miR-409-3p, miR-3969, miR-151-3p, miR-330-3p, miR-29b-3p, miR-29a-3p, miR-331-5p, miR-3065-3p, miR-3074-5p, miR-330-3p, miR-151a-3p, miR-877-3p, miR-29b, miR-380-3p, miR-29d-3p, miR-21a-3p

miR-143-5p, miR-125b-2-3p, miR-3962, miR-30b-3p, miR-7857, miR-544a, miR-1388-5p, miR-2284aa, miR-199b-3p, miR-105-1, miR-142-3p, miR-216a-3p, miR-320b, miR-199a-3p, miR-182-5p, miR-16b, miR-3955-3p, miR-3085-3p, miR-214-3p, miR-424-5p, miR-30c-1-3p, miR-491-3p, miR-2310, miR-378j, miR-452-3p, miR-20a-3p, miR-2319b, miR-3064-5p, miR-139-5p, miR-211-5p, miR-2483-3p, miR-499a-3p, miR-378g, miR-218-5p, miR-769-5p, miR-490-5p, miR-212-3p, miR-3059-5p, miR-154a, miR-5703, miR-1197-5p, miR-1193, miR-4429, miR-378d, miR-2284u, miR-548e-3p, miR-15a-5p, miR-222-5p, miR-7859, miR-199a-3p, miR-671-3p, miR-2285p, miR-345-3p, miR-92a-1-5p, miR-216a-5p, miR-320d, miR-202-5p, miR-299-3p, miR-216c-5p, miR-183-5p, miR-345-3p, miR-130a-5p, miR-142a-3p, miR-2424, miR-450a-1-3p, miR-487b-5p, miR-345-5p, miR-1827, miR-186-5p, miR-548c-3p, miR-30c-1-3p, miR-2331-3p, miR-296-3p, miR-182-5p, miR-3065-3p, miR-6130, miR-139-5p, miR-499b-3p, miR-544-3p, miR-15b-5p, novel\_32, miR-22-3p, miR-450b-3p, miR-708-5p, miR-208b-5p, miR-424-5p, miR-4492, miR-129-2-3p, miR-3074-5p, miR-4510, miR-590-3p, miR-214, miR-3074-2-3p, miR-3958-5p, miR-769-5p, miR-1285, miR-7b-5p, miR-542-3p, miR-708-3p, miR-374b-3p, miR-22-3p, miR-450c-3p, miR-16-1-3p, miR-1260b, miR-30b-3p, miR-138, miR-29b, miR-16b, miR-497-5p, miR-26a-2-3p, miR-134-3p, miR-412-5p, miR-544b, miR-2355-3p, miR-194-3p, miR-7-5p, miR-2411-3p, miR-105-5p, miR-124-5p, miR-380-5p, miR-628-5p, miR-432-3p, miR-432-3p, miR-345-5p, let-7j, miR-2387, miR-378b, miR-410-5p, miR-195a-5p, miR-3074-5p, miR-320b, miR-655-5p, miR-299b-3p, miR-29a-3p, miR-144-3p, miR-320c, miR-28c, miR-15a, novel\_87, miR-16a, miR-29a, novel\_1, miR-6119-3p, miR-147-5p, miR-502b, miR-6123, miR-199c, miR-625-3p, miR-135a-2-3p, novel\_120, miR-29c-3p, miR-323c, miR-24-3p, miR-211, miR-2428, novel\_27, miR-3578, miR-

miR-3120-3p, novel\_68, miR-181b-3p, miR-653b, miR-677, novel\_69, miR-299b-3p, miR-374c-3p, miR-18a-3p, miR-18b, miR-148a-3p, miR-2387, let-7e-5p, miR-9851-3p, miR-450b-3p, miR-1193, miR-301b-3p, miR-326-3p, miR-24-3p, let-7i, miR-6529b, miR-28c, miR-576-3p, miR-4324, miR-147-5p, miR-128-1-5p, miR-130a-3p, miR-194-3p, miR-149-5p, let-7g-5p, miR-432-5p, miR-197-3p, miR-1843b-5p, miR-432, miR-708-3p, miR-873a-5p, miR-2284x, miR-744-5p, miR-455-5p, miR-4508, miR-1260b, miR-2483-5p, miR-363-5p, miR-345-5p, novel\_51, miR-455-5p, miR-365b-5p, miR-105-5p, miR-452-5p, miR-125a-5p, miR-660, miR-1343-5p, miR-615-5p, miR-1271, miR-125a, miR-215-5p, miR-2355-5p, miR-370-3p, miR-874-3p, miR-574-5p, miR-374c-3p, miR-18a, miR-362-5p, miR-3154, miR-301, miR-671-5p, miR-1248, miR-7144-5p, miR-23a-5p, novel\_48, miR-345-5p, miR-193a-5p, miR-28a-3p, miR-365a-5p, miR-1197-3p, miR-1260b, miR-500b-5p, miR-409-3p, miR-331-3p, miR-125b-5p, miR-6740-5p, miR-2332, miR-370-5p, miR-2433, miR-28-5p, miR-126b-3p, miR-18b-5p, miR-6517, miR-2285ad, miR-222, miR-299a-3p, miR-330-5p, miR-1343-5p, miR-615-3p, miR-105-2, let-7d, miR-4286, miR-29b-2-5p, miR-192-3p, miR-3065-3p, let-7g, miR-28b, miR-148b-5p, let-7c-5p, miR-30c-2-3p, miR-1260a, miR-152-3p, miR-543-5p, novel\_96, novel\_127, let-7f-5p, miR-28-3p, miR-7977, miR-499b-5p, miR-2319b, miR-10b, miR-4792, miR-4443, let-7d-5p, miR-203-3p, miR-489, miR-221, novel\_94, miR-136-5p, miR-504, miR-452-5p, miR-212-3p, miR-2447, miR-154a, miR-423-5p, miR-361-3p, miR-362-5p, miR-2285y, miR-615, novel\_82, miR-4726-5p, miR-181b-2-3p, miR-105-1, novel\_78, miR-1343-3p, miR-2300a-5p, miR-2459, miR-500-5p, miR-148b-5p, miR-216a-3p, miR-455-3p, miR-221-3p, miR-147a, miR-1298-3p, miR-758-3p, miR-3120-5p, miR-1839-5p, miR-21b, miR-450b-5p, miR-1388-5p, miR-2285n, miR-124a, let-7a-5p, miR-758-3p, miR-193a, miR-30c-1-5p, miR-212-5p, miR-299a-3p, miR-2285ad, miR-450a-1-3p, miR-134-5p, miR-2411-5p, miR-383-5p, miR-302a-5p, miR-30a-5p, miR-1197-5p, miR-2904, miR-134, miR-30c-5p, miR-30c, novel\_73, miR-300, miR-4429, miR-2285w, miR-376c-5p, miR-2411, miR-29b-1-5p, miR-30f, miR-30b, miR-21-3p, miR-299-3p, miR-466i-5p, miR-320d, miR-182-5p, miR-2285aa, miR-548o-3p, novel\_25, miR-331-5p, miR-30d-5p, miR-362-5p, miR-320a, miR-500a-3p, miR-450a-1-3p, miR-30e-5p, miR-21a-3p, miR-381-3p, miR-1827, miR-1814c, miR-186-5p, miR-625-5p, miR-30f, miR-767, miR-425-5p, miR-214, miR-500b-5p, miR-5100, miR-374b-3p, miR-592, miR-134-5p, miR-500, miR-767-5p, miR-6516-3p, miR-664a, miR-450b-3p, miR-27a-3p, miR-26b-3p, miR-500-5p, miR-539-5p, miR-194-5p, miR-323b, miR-450c-3p, miR-542-3p, miR-301b-5p, miR-223-3p, miR-1434-3p, miR-873a-5p, miR-188-5p, miR-27b-3p, miR-744-3p, miR-101b-3p, miR-2330-5p, miR-2310, miR-194a, miR-182-5p, miR-29b-1-5p, miR-323b-3p, miR-320b, miR-214-3p, miR-27a-3p, miR-4443, miR-320c, miR-299b-3p, miR-129b-5p, miR-3065-5p, miR-9851-3p, miR-194b-5p, miR-3059-5p, miR-2428, miR-24-3p, miR-362-5p, miR-301a-5p, miR-485-3p, miR-2440, novel\_82, miR-30b-5p, miR-1247-3p, miR-203b-5p, miR-499a-5p

|     |                   |                                                                                                                                                                                                                                                                                                                                                                                                                                                                                                                                                                                                                                                                                                                                                                                                                                                                                                                                                                                                                                                                                                                                                                                                                                                                                                                                                                                                                                                                                                                                                                                                                                                                                                                                                                                                                                                                                                                                                                                                                                                                                                                                                                                                                                                                                                                                                                                                                                                                                                                                                                                             |
|-----|-------------------|---------------------------------------------------------------------------------------------------------------------------------------------------------------------------------------------------------------------------------------------------------------------------------------------------------------------------------------------------------------------------------------------------------------------------------------------------------------------------------------------------------------------------------------------------------------------------------------------------------------------------------------------------------------------------------------------------------------------------------------------------------------------------------------------------------------------------------------------------------------------------------------------------------------------------------------------------------------------------------------------------------------------------------------------------------------------------------------------------------------------------------------------------------------------------------------------------------------------------------------------------------------------------------------------------------------------------------------------------------------------------------------------------------------------------------------------------------------------------------------------------------------------------------------------------------------------------------------------------------------------------------------------------------------------------------------------------------------------------------------------------------------------------------------------------------------------------------------------------------------------------------------------------------------------------------------------------------------------------------------------------------------------------------------------------------------------------------------------------------------------------------------------------------------------------------------------------------------------------------------------------------------------------------------------------------------------------------------------------------------------------------------------------------------------------------------------------------------------------------------------------------------------------------------------------------------------------------------------|
| PNN | ENSOARGO(pinin, d | <p>miR-6525, miR-1296-5p, miR-3074-2-3p, miR-2330-3p, miR-495-3p, miR-212-3p, novel_74, novel_1, miR-320e, miR-2284k, novel_63, miR-133a-5p, miR-320c, miR-1185-2-3p, miR-377-3p, miR-499b-5p, miR-7-1-3p, miR-545-3p, miR-543-3p, miR-505-3p, miR-186-5p, miR-10b-3p, miR-2318, miR-107, miR-3154, miR-381-3p, miR-320a, miR-381-3p, miR-503-3p, miR-376a-5p, miR-2285r, miR-654-3p, let-7f-2-3p, let-7f-2-3p, miR-107, miR-320d, miR-3071-3p, miR-500a-5p, miR-105-5p, miR-320b, miR-2285af, miR-377-3p, miR-1185-3p, miR-103, miR-302a-5p, miR-505-3p, miR-105-1, miR-103a-3p, miR-105-2, miR-2284ab, miR-4429, miR-300, miR-30a-5p, miR-2300b-3p, miR-1434-3p, miR-148a-3p, miR-216a-3p, miR-450b-3p, miR-410-5p, miR-195a-5p, miR-135b-5p, miR-216b-3p, miR-655-5p, miR-374c-3p, miR-320c, miR-15a, miR-16a, miR-206, miR-379-3p, miR-147-5p, miR-625-3p, miR-17-3p, miR-2285x, miR-495-3p, miR-301b-3p, miR-1434-3p, miR-22-3p, miR-450c-3p, miR-16-1-3p, miR-30b-3p, miR-16b, miR-2284x, miR-497-5p, miR-4508, miR-130a-3p, miR-2331-5p, miR-378a-5p, miR-493-5p, miR-380-5p, miR-101-5p, miR-2448-3p, miR-320a, miR-3154, miR-329a, miR-1248, miR-3957-5p, miR-374c-3p, miR-300-3p, miR-3957, miR-135a-1-3p, novel_63, miR-135a-5p, miR-331-3p, novel_9, miR-28-5p, miR-592, miR-16-5p, miR-1197-3p, miR-145-3p, miR-2427, miR-218-2-3p, miR-411-3p, miR-128-3p, miR-200b-3p, miR-6517, miR-429-3p, miR-2411-5p, miR-1271-5p, miR-322-5p, miR-214-5p, miR-545-5p, miR-450a-1-3p, miR-219-3p, miR-200c, miR-2285af, miR-200c-3p, miR-17-3p, miR-152-3p, miR-3529-3p, miR-181a-2-3p, miR-1, miR-30a-3p, miR-380-5p, miR-2285b, miR-2284y, miR-361-3p, miR-381-3p, miR-96-5p, miR-877-3p, miR-493-5p, miR-2284g, miR-7689-3p, miR-3082-5p, miR-2440, miR-218-5p, miR-301a-5p, miR-107-5p, miR-371a-5p, miR-499a-5p, miR-3956-3p, miR-2447, novel_60, miR-7705, miR-219a-2-3p, miR-301b-5p, miR-329-3p, miR-296-5p, miR-30b-3p, miR-1a-3p, miR-101a-5p, miR-362-3p, miR-16-2-3p, miR-1343-3p, novel_4, miR-539-5p, miR-1298-3p, miR-421, miR-148b-5p, miR-320b, miR-182-5p, miR-16b, miR-362-3p, miR-3955-3p, miR-130b-3p, miR-103a-2-5p, miR-214-3p, miR-2330-5p, miR-424-5p, miR-124a, miR-652-5p, miR-491-3p, miR-1b-5p, miR-8485, miR-4532, miR-450a-1-3p, let-7f-1-3p, miR-21a-3p, miR-129b-3p, novel_99, miR-1827, miR-186-5p, miR-625-5p, miR-543-3p, miR-548o-3p, miR-296-3p, miR-182-5p, miR-2284s, miR-301a-3p, miR-877-5p, miR-15b-5p, miR-22-3p, miR-204-3p, miR-30e-3p, let-7b-3p, miR-2285j, miR-665, miR-219b-3p, miR-30a-3p, miR-6516-3p, miR-17-3p, novel_74, miR-</p> |
| LTF | ENSOARGO(lactotra | <p>3p, miR-380-5p, miR-2285b, miR-2284y, miR-361-3p, miR-381-3p, miR-96-5p, miR-877-3p, miR-493-5p, miR-2284g, miR-7689-3p, miR-3082-5p, miR-2440, miR-218-5p, miR-301a-5p, miR-107-5p, miR-371a-5p, miR-499a-5p, miR-3956-3p, miR-2447, novel_60, miR-7705, miR-219a-2-3p, miR-301b-5p, miR-329-3p, miR-296-5p, miR-30b-3p, miR-1a-3p, miR-101a-5p, miR-362-3p, miR-16-2-3p, miR-1343-3p, novel_4, miR-539-5p, miR-1298-3p, miR-421, miR-148b-5p, miR-320b, miR-182-5p, miR-16b, miR-362-3p, miR-3955-3p, miR-130b-3p, miR-103a-2-5p, miR-214-3p, miR-2330-5p, miR-424-5p, miR-124a, miR-652-5p, miR-491-3p, miR-1b-5p, miR-8485, miR-4532, miR-450a-1-3p, let-7f-1-3p, miR-21a-3p, miR-129b-3p, novel_99, miR-1827, miR-186-5p, miR-625-5p, miR-543-3p, miR-548o-3p, miR-296-3p, miR-182-5p, miR-2284s, miR-301a-3p, miR-877-5p, miR-15b-5p, miR-22-3p, miR-204-3p, miR-30e-3p, let-7b-3p, miR-2285j, miR-665, miR-219b-3p, miR-30a-3p, miR-6516-3p, miR-17-3p, novel_74, miR-</p>                                                                                                                                                                                                                                                                                                                                                                                                                                                                                                                                                                                                                                                                                                                                                                                                                                                                                                                                                                                                                                                                                                                                                                                                                                                                                                                                                                                                                                                                                                                                                                                                        |



miR-9788-3p, miR-216a-3p, miR-455-3p, miR-194-3p, miR-412-5p, miR-147a, miR-339-5p, miR-31-5p, novel\_78, miR-497-5p, miR-101c, miR-455-5p, miR-30b-3p, miR-16b, miR-219a-1-3p, miR-412-3p, novel\_23, miR-374b-3p, miR-30b-3p, miR-484, miR-6412, miR-432-3p, miR-432-3p, miR-33a-5p, miR-424-5p, miR-103a-2-5p, miR-3955-3p, miR-2285l, miR-16b, miR-455-5p, miR-2411-3p, miR-224-5p, miR-326, novel\_115, miR-374c-3p, miR-7977, miR-139-5p, miR-452-3p, miR-20a-3p, miR-7975, miR-195a-5p, miR-1983, miR-147-3p, miR-412-3p, miR-361-3p, miR-326-3p, miR-423-5p, miR-2428, miR-219a-2-3p, miR-361-3p, novel\_111, miR-17-3p, miR-135a-2-3p, miR-656-5p, miR-16a, miR-107-5p, miR-15a, miR-502-5p, miR-6402, miR-129-1-3p, miR-486-5p, miR-322-5p, miR-6516-5p, miR-758-5p, miR-15a-5p, novel\_79, miR-412, miR-493-3p, miR-184-3p, miR-2904, miR-330-5p, miR-1197-5p, miR-1193, miR-188-3p, miR-5703, miR-345-3p, miR-486-3p, novel\_39, miR-3956-5p, miR-376a-5p, miR-28-3p, miR-17-3p, miR-127-5p, miR-345-3p, miR-339a, miR-219-3p, miR-15b-5p, miR-374c-3p, miR-132-5p, miR-6516, miR-139-5p, miR-370-3p, miR-2355-5p, miR-1271, miR-1277-3p, miR-23a-5p, miR-10b-3p, miR-339b, miR-200a-5p, miR-3184-5p, miR-145-3p, miR-224-5p, miR-16-5p, let-7e-3p, miR-129-2-3p, miR-3184-3p, miR-424-5p, miR-874-5p, miR-486b-3p, miR-17-3p, miR-132-5p, miR-551b-3p, miR-1271-3p, miR-183-5p, miR-2285w, miR-369-3p, miR-20a, miR-106a, miR-107, miR-21-3p, miR-299-3p, miR-205-5p, miR-216a-5p, miR-181c-3p, miR-7859, miR-2284h-5p, miR-548e-3p, miR-299a-3p, miR-106a, miR-33b-3p, miR-93, miR-4510, miR-410-3p, miR-204-5p, miR-2285j, miR-331-3p, miR-100-3p, miR-409-3p, miR-664a-5p, miR-3604, miR-320e, miR-300-3p, miR-582-5p, miR-374c-3p, miR-6130, miR-154b-5p, miR-2331-3p, miR-216b-3p, miR-2312, miR-345-5p, miR-345-5p, miR-20b-5p, miR-582-5p, miR-2285c, miR-301, miR-3613-5p, miR-93-5p, miR-17-5p, miR-345-5p, miR-491-3p, miR-106a-5p, miR-323b-3p, miR-106a-5p, miR-106b-5p, miR-17-5p, miR-412-5p, miR-2285g, miR-1298-3p, miR-194-3p, miR-411-5p, miR-103, miR-20b, miR-2285e, novel\_78, miR-103a-3p, miR-1343-3p, miR-5010-3p, miR-101a-5p, miR-2426, miR-16-2-3p, miR-301b-5p, miR-2113, miR-323b, miR-125b-2-3p, miR-211, miR-1285-5p, miR-7705, novel\_60, miR-3059-5p, miR-3956-3p, miR-2285f, miR-452-5p, novel\_101, miR-3613, miR-20a-5p, miR-301a-5p, miR-299b-3p, miR-374c-3p, miR-211-5p, miR-450b-3p, miR-107, miR-9851-3p, miR-2285ab, miR-378b

MADCAM1 ENSOARGO(mucosal

TRNT1 ENSOARGO(trNA nuc

miR-218-5p, miR-2440, miR-2284j, miR-2447, miR-3956-3p, miR-1285-5p, miR-361-3p, miR-877-3p, novel\_111, miR-140-5p, miR-96-5p, miR-299b-5p, miR-136-5p, miR-7689-3p, miR-4792, miR-4443, miR-378g, miR-499a-3p, miR-29b-1-5p, novel\_19, miR-199a-3p, miR-146b, miR-199b-5p, miR-214-3p, miR-491-5p, miR-676-3p, miR-8485, miR-2310, miR-2284r, miR-1839-5p, miR-181b-2-3p, miR-1343-3p, novel\_78, miR-2459, miR-147a, miR-142-5p, miR-1298-3p, let-7f, miR-500, miR-874-5p, miR-4492, miR-130b-5p, novel\_74, miR-665-5p, miR-214, let-7b, miR-3074-5p, miR-122-5p, miR-142a-5p, miR-6525, miR-500a-3p, miR-129b-3p, miR-299, miR-885-3p, miR-186-5p, miR-1827, miR-345-5p, miR-296-3p, miR-2331-3p, miR-30c-1-3p, let-7i-5p, miR-376e-3p, miR-2284s, miR-10a, miR-377-3p, miR-499b-3p, miR-219b-5p, miR-324-3p, miR-92a-1-5p, miR-618, let-7k, miR-98-5p, miR-345-3p, miR-486-3p, miR-376a-5p, miR-376c-3p, miR-181b-1-3p, miR-193b-5p, miR-1961, miR-34a-5p, miR-142-3p, miR-184-3p, miR-212-5p, miR-1247-5p, miR-328-3p, novel\_87, miR-142b, miR-576-3p, miR-6123, miR-29a, miR-206, miR-193b-3p, miR-29c-3p, miR-199b-5p, miR-1306, miR-3141, miR-146b-5p, let-7e-5p, miR-3120-3p, novel\_68, miR-3074-5p, miR-669, miR-6535, miR-677, miR-320c, miR-181b-3p, miR-299b-3p, miR-3141, miR-194a, miR-146a, miR-377-3p, miR-193a-3p, miR-378a-5p, miR-432-3p, miR-2284l, miR-22-3p, miR-197-3p, miR-542-3p, miR-1843b-5p, miR-223-3p, miR-2113, miR-2284x, miR-31-5p, miR-194-3p, miR-134-3p, miR-125b-5p, novel\_63, miR-2284k, miR-134-5p, novel\_42, miR-2284v, miR-1260b, miR-767, miR-876-3p, miR-345-5p, miR-2355-5p, miR-2285aa, miR-125a, miR-574-5p, miR-874-3p, miR-3068-3p, miR-376c-3p, miR-3959-5p, miR-125a-3p, miR-664-3p, novel\_96, miR-127-5p, let-7f-5p, miR-3064-5p, let-7g, novel\_39, miR-330-5p, miR-155-5p, miR-885-3p, miR-1224-5p, miR-299a-3p, miR-134-5p, miR-2284z, miR-2285t, miR-

miR-371a-5p, novel\_82, miR-218-5p, miR-101-3p, miR-2284q, miR-1296-5p, miR-181d-5p, miR-190b-5p, miR-2284j, miR-212-3p, miR-502-3p, miR-1285-5p, miR-7705, miR-361-3p, miR-140-5p, miR-9-3p, miR-1983, miR-139-5p, miR-452-3p, miR-144-5p, miR-500-3p, miR-499a-3p, miR-3082-5p, miR-362-3p, miR-16b, miR-342, miR-320b, novel\_103, miR-1185-5p, miR-491-5p, miR-487b-5p, miR-652-5p, miR-376b, miR-33a-5p, miR-494-3p, miR-424-5p, miR-30c-1-3p, miR-1a-3p, miR-501-3p, miR-30b-3p, miR-296-5p, miR-6529a, miR-329-3p, miR-484, miR-2284aa, miR-101c, miR-362-3p, miR-450b-5p, miR-1343-3p, novel\_4, miR-330-3p, miR-455-3p, miR-9788-3p, miR-216a-3p, miR-338-5p, miR-2285j, miR-487a-5p, miR-190a-5p, miR-208b-5p, miR-424-5p, miR-669a-3p, miR-450b-3p, miR-487b-5p, miR-155-5p, miR-425-5p, miR-145a-3p, miR-129-2-3p, miR-181c-5p, miR-338-3p, miR-6525, miR-206-3p, miR-450a-1-3p, miR-543-3p, miR-186-5p, miR-370-5p, miR-296-3p, miR-552-3p, miR-30c-1-3p, miR-221-5p, miR-2331-3p, miR-545-3p, miR-15b-5p, miR-155-5p, miR-499b-3p, miR-377-3p, miR-139-5p, miR-500a-5p, miR-345-3p, miR-92a-1-5p, miR-26a-5p, miR-221-5p, miR-1277-5p, miR-3653-3p, miR-21-3p, miR-2284m, miR-320d, miR-345-3p, miR-183-5p, miR-2904, miR-5703, miR-126-3p, novel\_133, miR-362-3p, miR-16-1-3p, miR-361-5p, miR-4429, novel\_73, miR-33b-3p, miR-505-3p, novel\_83, miR-383-5p, miR-15a-5p, miR-200b, miR-16a, miR-15a, miR-576-3p, miR-142b, miR-421-5p, miR-656-5p, miR-147-5p, miR-379-3p, miR-206, miR-495-3p, miR-1193, novel\_120, miR-135a-2-3p, miR-342-3p, novel\_27, miR-24-3p, miR-376b-3p, miR-3065-5p, miR-376b-5p, miR-195a-5p, miR-505-3p, miR-412-3p, miR-107, miR-7-1-3p, miR-26b-5p, miR-3120-3p, miR-320c, miR-144-3p, miR-190a, miR-330-3p, miR-455-5p, miR-2411-3p, miR-377-3p, miR-483-3p, miR-363-5p, miR-628-5p, let-7j, miR-432-3p, miR-432-3p, miR-2284l, miR-450c-3p, miR-708-3p, miR-873a-

miR-4429, miR-133a-3p, miR-2284u, miR-34a-5p, miR-361-5p, miR-376a-5p, miR-217-5p, miR-23c, miR-222-5p, miR-2284h-5p, miR-532-3p, miR-328-3p, miR-18a-3p, miR-212-5p, miR-30d-3p, miR-320d, miR-466i-5p, miR-34b-5p, miR-21-3p, miR-92a-1-5p, miR-185-3p, miR-2285i, miR-130a-5p, miR-146a-5p, miR-543-3p, miR-1827, miR-21a-3p, miR-2285c, miR-129b-3p, miR-6130, miR-323-5p, miR-204-3p, miR-32-3p, miR-532-5p, miR-190a-5p, miR-15b-3p, miR-2285j, miR-30e-3p, miR-324-3p, miR-30a-3p, miR-665, miR-346, miR-181c-5p, miR-539-5p, miR-145a-3p, miR-4510, miR-214, miR-101a-5p, miR-296-5p, miR-376b-3p, miR-147a, miR-2285e, novel\_78, miR-145b, miR-3955-3p, miR-146b, miR-214-3p, miR-320b, miR-342, miR-505, miR-2310, miR-1388-3p, miR-494-3p, miR-101b-3p, miR-127-3p, miR-2284b, miR-376a-3p, miR-335-3p, miR-361-3p, miR-378g, miR-3082-5p, miR-144-5p, miR-203-3p, miR-376d, miR-664b, miR-2284g, miR-20a-3p, miR-7689-3p, miR-499b-5p, miR-7977, miR-3958-3p, miR-374a-3p, miR-2284q, miR-2285n, novel\_82, miR-2285y, miR-1285-5p, miR-32-3p, miR-2447, miR-212-3p, miR-190b-5p, miR-181d-5p, miR-300, let-7a-2-3p, miR-3591-5p, miR-134, miR-302a-5p, miR-24-2-5p, miR-483-3p, miR-134-5p, miR-582-3p, miR-545-5p, novel\_121, miR-2285ad, miR-450a-2-3p, miR-28-3p, miR-181b-5p, novel\_127, miR-2285af, miR-376b-3p, miR-1260a, miR-664-3p, miR-217, miR-29a-5p, miR-2284y, miR-2284a, miR-30a-3p, miR-181a-2-3p, let-7g-3p, miR-329b, miR-7144-5p, miR-1814c, miR-488-3p, miR-381-3p, miR-331-5p, miR-320a, miR-34c-5p, miR-874-3p, miR-2285aa, miR-2355-5p, miR-331-5p, miR-374b-3p, miR-134-5p, miR-26c, miR-6740-5p, miR-3969, miR-1260b, miR-374a-3p, miR-145-3p, miR-28a-3p, miR-6128, miR-3607-3p, miR-144-5p, miR-1260b, miR-653, miR-708-3p, miR-181a-5p, miR-1285, miR-145a-5p, miR-3071-5p, miR-2285g, miR-412-5p, miR-134-3p, miR-2431, miR-6238, miR-26b-3p, miR-483-3p, miR-146a, miR-

miR-34b-5p, miR-503-3p, miR-874-3p, miR-574-5p, miR-134-5p, miR-1197-3p, miR-3591-5p, miR-330-5p, miR-758-5p, novel\_121, miR-2284z, miR-450a-1-3p, miR-134-5p, novel\_79, miR-1224-5p, miR-127-5p, novel\_127, miR-2285b, novel\_39, miR-378f, miR-2319a, miR-3065-5p, miR-150-5p, miR-1306, miR-181b-3p, miR-677, miR-320c, miR-3074-5p, miR-216b-3p, miR-28c, novel\_87, miR-16-1-3p, miR-27b-3p, miR-4508, miR-26a-2-3p, miR-432, miR-19b-2-5p, miR-450c-3p, miR-3431, miR-194-3p, miR-31-5p, miR-339-5p, miR-377-3p, miR-2411-3p, miR-194a, miR-2284l, miR-432-3p, miR-2285r, miR-432-3p, miR-628-5p, miR-668-3p, miR-345-5p, miR-339b, miR-1827, miR-186-5p, miR-450a-1-3p, miR-2285c, miR-411, miR-433-3p, miR-129b-3p, miR-598-3p, miR-10a, miR-377-3p, miR-30c-1-3p, miR-2331-3p, miR-296-3p, miR-216b-3p, novel\_74, miR-130b-5p, miR-129-5p, miR-2285j, miR-3604, miR-665, miR-769-5p, miR-6525, miR-3074-5p, miR-16-1-3p, miR-2366, miR-378i, miR-378a-3p, miR-7859, miR-328-3p, miR-2284h-5p, miR-18a-3p, miR-618, miR-2285p, miR-345-3p, miR-422a, miR-92a-1-5p, miR-181b-1-3p, miR-142a-3p, miR-486-3p, miR-2424, miR-2285w, miR-9-3p, miR-335-3p, miR-25, miR-2319b, miR-7689-3p, miR-3968, miR-101-3p, miR-218-5p, miR-1285-5p, miR-885-5p, miR-2447, miR-1388-5p, miR-1298-3p, miR-539-5p, miR-455-3p, miR-199b-3p, miR-181b-2-3p, miR-1185-5p, miR-199a-3p, miR-29b-1-5p, miR-378d, miR-2310, miR-10b-3p, miR-1814c, miR-671-5p, miR-3074-1-3p, miR-7144-5p, miR-503-3p, miR-488-3p, miR-362-5p, miR-320a, miR-3154, miR-769, miR-3965, miR-324-5p, miR-598-3p, miR-486b-3p, miR-409-3p, miR-500b-5p, miR-323-3p, miR-378c, miR-145-3p, miR-411-3p, miR-496, miR-10a-5p, miR-134, miR-345-3p, miR-7134-5p, miR-218-2-3p, miR-378h, miR-2411-5p, miR-545-5p, miR-181b-5p, miR-17-3p, miR-450a-2-3p, miR-513-5p, miR-2285af, miR-229a, miR-30c-2-3p, miR-let-7f-1-3p, miR-2448-3p, miR-7144-5p, miR-1248, miR-2331-3p, miR-32-3p, miR-503-3p, miR-370-5p, miR-3065-3p, miR-133c, miR-877-5p, let-7i-5p, miR-15b-5p, let-7b-3p, let-7f, miR-1-5p, miR-370-5p, miR-29b-2-5p, miR-424-5p, let-7b, miR-16-5p, miR-98-3p, let-7b-5p, miR-196a-5p, miR-196l, miR-98-3p, let-7d, let-7a-3p, miR-18a-3p, miR-3600, miR-322-5p, miR-383-5p, miR-15a-5p, let-7c-5p, miR-1a-2-5p, miR-98-5p, let-7f-5p, miR-21-3p, novel\_127, let-7k, miR-216c-5p, miR-29b-2-5p, miR-4286, miR-29b-1-5p, miR-376a-5p, miR-2432, let-7g, miR-3065-3p, miR-2285b, miR-409-5p, miR-18a-3p, miR-195a-5p, let-7e-5p, miR-20a-3p, miR-7689-3p, let-7d-5p, miR-15a, miR-16a, let-7i, miR-382-5p, miR-32-3p, miR-1a-1-5p, miR-1193, miR-16b, miR-2426, miR-497-5p, miR-665, let-7g-5p, miR-544b, miR-2459, miR-29b-1-5p, miR-16b, miR-196b-5p, miR-487b-5p, let-7e, let-7a-5p, miR-424-5p, miR-2483-5p

CCL28

ENSOARGO( chemokin

CDV3

ENSOARGO( CDV3 hom

miR-29b-2-5p, miR-228bj, miR-487a-5p, miR-454-3p, miR-208b-5p, miR-17-3p, miR-450b-3p, novel\_74, miR-1271, miR-3184-3p, miR-224-5p, miR-769-5p, miR-30d-5p, miR-450a-1-3p, miR-30f, miR-21-3p, miR-32-3p, miR-548o-3p, novel\_25, miR-22-3p, miR-216b-5p, miR-377-3p, miR-544-3p, miR-301a-3p, miR-216a-5p, miR-500a-5p, miR-26a-5p, miR-2285p, miR-30b, miR-30d, miR-2284m, miR-369-3p, miR-2285w, miR-105-3p, miR-143-3p, miR-2432, miR-2424, miR-146a-5p, miR-125b-2-3p, miR-376a-5p, miR-29b-1-5p, miR-376a-5p, miR-362-3p, miR-30c-5p, miR-218-1-3p, miR-184-3p, miR-19b-3p, miR-485-3p, miR-3600, miR-548e-3p, miR-328-3p, miR-2284h-5p, miR-340-5p, miR-222-5p, miR-23c, miR-23b-3p, miR-487a-3p, miR-7859, miR-371a-5p, miR-769-5p, miR-101-3p, miR-382-3p, miR-30b-5p, miR-2284q, miR-3964, miR-490-5p, miR-2285t, miR-499a-5p, miR-181d-5p, miR-2285f, miR-212-3p, miR-3059-5p, miR-32-3p, miR-7705, miR-8095, miR-1285-5p, novel\_111, miR-199b-5p, miR-96-5p, miR-126b-5p, miR-541-5p, miR-4792, miR-2483-3p, miR-378g, miR-499a-3p, miR-362-3p, miR-505, miR-29b-1-5p, miR-326, miR-342, miR-146b, miR-199b-5p, miR-130b-3p, miR-744-3p, miR-376b, miR-23a-3p, miR-676-3p, miR-382-3p, miR-1b-5p, miR-2310, miR-8485, miR-329-3p, miR-16-2-3p, miR-544a, miR-362-3p, miR-105-1, miR-1343-3p, miR-455-3p, miR-100-3p, novel\_63, miR-2284k, miR-6128, miR-2284v, miR-145-3p, miR-23b, miR-2448-3p, miR-503-3p, miR-30e-5p, miR-1814c, let-7g-3p, miR-329a, miR-2355-5p, miR-2285aa, miR-199a-5p, miR-223-5p, miR-769, miR-30f, miR-2285af, miR-17-3p, miR-29b-2-5p, miR-3529-3p, miR-2285b, miR-199a-5p, miR-380-5p, miR-30a-5p, miR-330-5p, let-7a-2-3p, miR-128-3p, miR-105-2, miR-30c, novel\_121, miR-450a-1-3p, miR-545-5p, miR-758-5p, miR-1271-5p, novel\_87, miR-133a-5p, miR-421-5p, miR-22-5p, novel\_1, miR-6119-3p, miR-17-3p, miR-2285v, miR-342-

miR-4443, miR-500-3p, miR-27a-3p, miR-378e, miR-2b, miR-3082-5p, miR-211-5p, miR-9-3p, miR-299b-5p, miR-147-3p, miR-504, miR-129b-5p, miR-199b-5p, miR-502-3p, miR-9-3p, miR-362-5p, novel\_111, miR-190b-5p, novel\_60, miR-3956-3p, miR-363-3p, miR-107-5p, miR-9788-3p, miR-455-3p, miR-500-5p, miR-421, miR-5010-3p, miR-181b-2-3p, miR-27a-3p, miR-330-3p, novel\_78, miR-548w, miR-101c, miR-21b, miR-3120-5p, miR-378c, miR-299a-5p, miR-544a, miR-501-3p, miR-1a-3p, miR-30b-3p, miR-378b, miR-4791, miR-378d, let-7c-3p, miR-124a, miR-382-3p, miR-424-5p, miR-2330-5p, miR-199b-5p, miR-103a-2-5p, miR-3955-3p, miR-505, miR-29b-1-5p, miR-16b, miR-320b, novel\_115, miR-15b-5p, miR-6516, miR-544-3p, miR-193b-3p, miR-21-3p, miR-532-5p, miR-552-3p, miR-378a-3p, miR-32-5p, miR-504-5p, novel\_99, miR-133b-3p, let-7g-3p, miR-18a-5p, miR-345-5p, miR-433-3p, miR-338-3p, miR-206-3p, novel\_44, miR-224-5p, miR-378c, miR-129-2-3p, miR-190a-5p, miR-129-5p, miR-424-5p, miR-130b-5p, miR-29b-2-5p, miR-15b-3p, miR-15a-5p, miR-505-3p, miR-133a-3p, miR-4429, miR-124-3p, miR-5703, miR-378a-3p, miR-378i, novel\_133, miR-1246, miR-2424, miR-486-3p, miR-143-3p, miR-380-3p, miR-29b-1-5p, miR-181b-1-3p, miR-329a-5p, miR-1277-5p, miR-3653-3p, miR-320d, miR-345-3p, miR-125b, miR-422a, miR-2285p, miR-320c, miR-677, miR-181b-3p, miR-2404, miR-670-3p, miR-374c-3p, miR-329-5p, miR-378b, miR-9851-3p, miR-195a-5p, miR-505-3p, miR-378f, miR-135b-5p, miR-378b, miR-3591-3p, miR-376b-5p, miR-18b, miR-199b-5p, miR-2428, miR-211, miR-193b-3p, miR-135a-2-3p, miR-6123, miR-502b, miR-92a-3p, miR-6119-3p, miR-206, novel\_1, miR-16a, novel\_87, miR-15a, miR-194-3p, miR-2355-3p, miR-544b, miR-3535, miR-185-5p, miR-497-5p, miR-2284x, miR-27b-3p, miR-380-3p, miR-30b-3p, miR-16b, miR-219a-1-3p, miR-125b-1-3p, miR-374b-3p, miR-345-5p, miR-132-3p, miR-132-3p, miR-377-3p, miR-330-3p, miR-3085-3p, miR-6240, miR-376b, miR-491-3p, miR-8485, miR-181a-5p, miR-873a-5p, miR-2426, miR-27b-3p, miR-330-3p, miR-27a-3p, miR-421, miR-500-5p, miR-2285n, miR-2285y, miR-135a-2-3p, miR-2285x, miR-181d-5p, miR-362-5p, miR-154a, miR-2387, miR-378j, miR-1291, miR-544-5p, miR-505-3p, miR-3064-5p, miR-664b, miR-7977, miR-2285u, miR-2483-3p, miR-27a-3p, miR-664-3p, miR-92a-1-5p, miR-500a-5p, miR-181b-5p, miR-30b-3p, miR-3653-3p, miR-4286, miR-181a-2-3p, miR-3064-5p, miR-421-5p, miR-29a-5p, miR-2432, miR-200a, miR-2366, miR-5703, novel\_73, miR-2285ad, miR-505-3p, miR-214-5p, miR-665, miR-487a-5p, miR-129-5p, miR-1197-3p, miR-500b-5p, miR-181c-5p, miR-122-5p, miR-3154, miR-362-5p, miR-574-5p, miR-2331-3p, miR-296-3p, miR-656-3p, miR-377-3p, miR-335, miR-381-5p, miR-381-5p, novel\_39, miR-335-5p, miR-2285j, miR-129b-3p

FBP2 ENSOARGO(fructose)

NPEPPS ENSOARGO(aminopep)

GAN ENSOARGO(gigaxoni)

miR-1, miR-238b-3p, miR-29b-2-5p, miR-181a-2-3p, miR-2284y, novel\_39, miR-490-3p, miR-192-3p, miR-2285b, miR-2284a, miR-450b-5p, miR-2478, miR-3071-3p, miR-2285af, miR-125a-3p, miR-543-5p, miR-17-3p, miR-127-5p, miR-181b-5p, miR-412, miR-7641, miR-299a-3p, miR-6517, miR-429-3p, miR-545-5p, miR-134-5p, novel\_121, miR-1271-5p, miR-758-5p, miR-330-5p, miR-345-3p, miR-134, miR-1290, miR-3578, miR-128-3p, miR-200b-3p, miR-496, miR-6128, miR-193a-5p, miR-1306-5p, miR-2284v, miR-6740-5p, miR-331-3p, miR-409-3p, miR-3969, miR-135a-5p, miR-34c-3p, miR-2284k, miR-592, miR-134-5p, novel\_9, miR-2285aa, miR-503-3p, miR-223-5p, miR-133c, miR-154b-5p, miR-374c-3p, miR-3154, miR-301, miR-503-3p, miR-424-3p, miR-7144-5p, miR-1814c, miR-485-5p, miR-345-5p, miR-2318, miR-382, miR-130b-5p, miR-493-5p, miR-6240, miR-345-5p, miR-432-3p, miR-432-3p, miR-2284l, miR-330-3p, let-7d-3p, miR-2411-3p, miR-224-5p, miR-377-3p, miR-146a, miR-193a-3p, miR-124-5p, miR-130a-3p, miR-26b-3p, miR-3955-5p, miR-187-3p, novel\_116, miR-544b, miR-2284d, miR-2285g, miR-185-5p, miR-3431, miR-197-3p, novel\_23, miR-3071-5p, miR-374b-3p, miR-708-3p, miR-873a-5p, miR-653, miR-181a-5p, miR-223-3p, miR-1434-3p, miR-7862, miR-2284x, miR-16-1-3p, miR-193b-3p, miR-17-3p, miR-326-3p, miR-2284w, miR-323c, miR-147-5p, miR-199c, miR-206, novel\_1, miR-320b, miR-26b-5p, miR-669, novel\_69, miR-374c-3p, miR-299b-3p, miR-3970, miR-3065-5p, miR-378b, miR-3591-3p, miR-216a-3p, miR-2319a, miR-146b-5p, miR-6516-3p, miR-135b-5p, miR-19a-3p, miR-146a-5p, miR-29b-1-5p, miR-219b-5p, miR-216a-5p, miR-500a-5p, miR-345-3p, miR-221-5p, miR-299-3p, miR-2284m, miR-548e-3p, miR-7859, miR-383-5p, miR-200b, miR-340-5p, miR-2904, miR-1434-5p, miR-5703, novel\_133, miR-2366, miR-16-1-3p, miR-378d, miR-19b-3p, miR-1271, miR-2330-3p, miR-181c-5p, miR-224-5p, miR-206-3p, miR-499a-5p, novel\_1, miR-656-5p, miR-147-5p, novel\_82, miR-4324, miR-502-5p, miR-371a-5p, novel\_111, miR-342-3p, miR-17-3p, miR-376a-3p, miR-493-5p, miR-6516-3p, miR-361-3p, miR-1306, miR-3970, miR-18a-3p, miR-376b-3p, miR-670-3p, miR-203-3p, miR-677, miR-27a-3p, miR-4443, miR-181b-3p, miR-376d, miR-1185-2-3p, miR-139-5p, miR-216b-3p, miR-20a-3p, miR-7689-3p, miR-125a-5p, miR-466f-3p, miR-214-3p, miR-342, miR-431-5p, novel\_103, miR-1306-5p, miR-365b-5p, miR-2957, novel\_51, miR-758-3p, miR-345-5p, miR-493-5p, miR-628-5p, miR-652-5p, miR-33a-5p, miR-1388-5p, miR-1260b, miR-27b-3p, miR-484, miR-22-3p, miR-431-3p, miR-758-3p, miR-376b-3p, miR-148b-5p, miR-1185-3p, novel\_4, novel\_78, miR-409b, miR-27a-3p, miR-17-3p, miR-125b-5p, miR-26c, miR-665, miR-1260b, miR-365a-5p, miR-3184-3p, miR-6128, miR-214, miR-345-5p, miR-345-5p, miR-625-5p, miR-376e-3p, miR-139-5p, miR-223-5p, miR-22-3p, miR-376c-3p, miR-1277-3p, miR-874-3p, miR-125a, miR-17-3p, miR-466i-5p, miR-200c-3p, novel\_127, miR-21-3p, miR-376b-3p, miR-1260a, miR-200c, miR-6119-5p, miR-219b-5p, miR-30f, miR-125b, miR-185-3p, miR-376c-3p, miR-181b-1-3p, miR-2424, miR-490-3p, miR-181a-2-3p, miR-200b-3p, miR-148a-5p, miR-1434-5p, miR-140-3p, miR-200b, miR-545-5p, miR-2284h-5p, miR-214-5p, miR-18a-3p, miR-429-3p, miR-431

RNASEH2B ENSOARGO(ribonucl

ASAHI ENSOARGO(N-acylsp



|       |                              |                                                                                                                                                                                                                                                                                                                                                                                                                                                                                                                                                                                                                                                                                                                                                                                                                                                                                                                                      |
|-------|------------------------------|--------------------------------------------------------------------------------------------------------------------------------------------------------------------------------------------------------------------------------------------------------------------------------------------------------------------------------------------------------------------------------------------------------------------------------------------------------------------------------------------------------------------------------------------------------------------------------------------------------------------------------------------------------------------------------------------------------------------------------------------------------------------------------------------------------------------------------------------------------------------------------------------------------------------------------------|
|       |                              | miR-503-3p, miR-543-3p, miR-32-5p, miR-15b-5p, miR-300-3p, miR-544-3p, miR-499b-3p, miR-19b-1-5p, miR-208b-5p, miR-424-5p, miR-669a-3p, miR-486b-3p, novel_74, miR-6516-3p, miR-16-5p, miR-590-3p, miR-224-5p, miR-501-3p, miR-2284u, miR-412, miR-2285ad, novel_121, miR-9-5p, miR-322-5p, miR-15a-5p, miR-543-5p, miR-3529-3p, miR-486-3p, miR-2284a, miR-450b-5p, miR-125b-2-3p, miR-142a-3p, miR-544-5p, miR-195a-5p, miR-136-5p, miR-668-5p, miR-2285u, miR-20a-3p, miR-500-3p, miR-1185-2-3p, miR-499a-3p, miR-7857-3p, novel_69, miR-16a, miR-2285n, miR-4324, miR-15a, miR-3964, miR-452-5p, miR-9-5p, miR-363-3p, miR-502-3p, miR-412-3p, miR-501-3p, miR-374b-3p, miR-432, miR-653, miR-19b-2-5p, miR-21b, miR-497-5p, miR-16b, miR-544a, novel_116, miR-544b, miR-432-5p, miR-142-3p, miR-32, miR-16b, miR-224-5p, miR-652-5p, miR-2284b, miR-424-5p, miR-3187-3p, let-7j, miR-491-3p                                     |
| CPEB2 | ENSOARGO(C cytoplasmic)      | miR-139-5p, miR-361-3p, miR-2387, miR-1306, miR-107, miR-877-3p, miR-195a-5p, miR-505-3p, miR-9-5p, novel_111, miR-24-3p, miR-15a, miR-16a, miR-33a-3p, miR-2285t, miR-656-5p, miR-103a-3p, miR-425-3p, miR-149-5p, miR-455-3p, miR-421, miR-103, miR-16b, miR-2426, miR-497-5p, miR-424-5p, miR-432-3p, miR-4532, miR-224-5p, miR-1306-5p, miR-29b-1-5p, miR-16b, novel_51, miR-452-5p, miR-125a-5p, miR-99a-3p, miR-125a, miR-615-5p, miR-139-5p, miR-365a-3p, miR-133c, miR-15b-5p, miR-500a-3p, miR-625-5p, miR-186-5p, miR-671-5p, miR-3184-3p, miR-145a-3p, miR-16-5p, miR-224-5p, miR-338-3p, miR-99b-3p, miR-331-3p, miR-125b-5p, miR-100-3p, miR-29b-2-5p, miR-665, miR-500, miR-424-5p, miR-486b-3p, miR-6517, miR-505-3p, miR-322-5p, miR-9-5p, miR-15a-5p, miR-2904, miR-1193, miR-216c-5p, miR-29b-2-5p, miR-4286, miR-2403, miR-29b-1-5p, miR-130a-5p, miR-486-3p, miR-8117, miR-125b, miR-99a-3p, miR-107, miR-543-5p |
| DUPD1 | ENSOARGO(C dual specific)    | miR-196a-5p, miR-330-5p, miR-501-3p, let-7a-2-3p, miR-1271-5p, miR-6516-5p, miR-199a-3p, miR-545-5p, miR-6119-5p, miR-466i-5p, miR-181b-5p, miR-29b-2-5p, miR-142a-3p, miR-181b-1-3p, miR-28b, miR-3154, miR-500a-3p, let-7g-3p, let-7g-3p, miR-876-3p, miR-186-5p, miR-543-3p, miR-140-5p, miR-552-3p, miR-216b-5p, miR-139-5p, miR-6516, miR-135a-5p, miR-29b-2-5p, miR-338-5p, miR-6516-3p, miR-500, miR-1271, miR-181c-5p, miR-181a-5p, miR-484, miR-501-3p, miR-219a-1-3p, miR-450b-5p, miR-27b-3p, miR-27a-3p, miR-26b-3p, miR-539-5p, miR-142-3p, miR-2355-3p, miR-326, miR-1306-5p, miR-199a-3p, miR-196b-5p, miR-101b-3p, miR-494-3p, let-7a-2-3p, miR-8485, miR-3065-5p, miR-150-5p, miR-1306, miR-96-5p, miR-135b-5p, miR-9-3p, miR-4792, miR-139-5p, miR-3120-3p, miR-320b, miR-27a-3p, miR-500-3p, miR-181b-3p, miR-677, miR-28c, miR-2440, novel_87, miR-181d-5p, miR-2285m, miR-326-3p, miR-9-3p, miR-502-3p          |
| LCOR  | ENSOARGO(C ligand dependent) |                                                                                                                                                                                                                                                                                                                                                                                                                                                                                                                                                                                                                                                                                                                                                                                                                                                                                                                                      |

miR-6517, miR-299a-3p, miR-2411-5p, miR-24-2-5p, miR-505-5p, miR-214-5p, miR-3578, miR-1343-5p, miR-128-3p, miR-4286, miR-450b-5p, miR-1271-3p, miR-6119-5p, miR-1260a, miR-205-5p, novel\_127, miR-152-3p, miR-331-5p, miR-2448-3p, miR-23b, miR-3154, miR-329a, miR-329b, miR-10b-3p, miR-671-5p, miR-7144-5p, miR-1306-5p, miR-6128, miR-1260b, miR-2433, miR-331-3p, miR-6740-5p, miR-331-5p, miR-28-5p, miR-592, miR-31-5p, miR-185-5p, miR-432-5p, miR-1843b-5p, miR-1285, miR-1434-3p, miR-19b-2-5p, miR-432, miR-3071-5p, miR-194-5p, miR-22-3p, miR-1260b, miR-30b-3p, miR-27b-3p, miR-363-5p, miR-654-3p, miR-296-3p, miR-377-3p, miR-296-3p, miR-224-5p, miR-194a, novel\_51, miR-3141, miR-193a-3p, miR-660, miR-1343-5p, miR-3074-5p, novel\_68, miR-299b-3p, miR-181b-3p, miR-677, miR-3141, miR-148a-3p, miR-216a-3p, miR-18a-3p, miR-342-3p, miR-542-5p, miR-193b-3p, miR-1307-3p, miR-2428, novel\_27, miR-133a-5p, miR-502-5p, miR-1247-3p, miR-485-3p, miR-6119-3p, miR-147-5p, miR-18a-3p, miR-3960, miR-23c, miR-148b-3p, miR-383-5p, miR-23b-3p, miR-2284h-5p, miR-532-3p, miR-362-3p, miR-1197-5p, miR-2904, miR-378d, miR-218-1-3p, miR-2285w, miR-345-3p, miR-181b-1-3p, miR-2411, miR-542-5p, miR-2285p, miR-92a-1-5p, miR-324-3p, miR-760-3p, miR-299-3p, miR-660-5p, miR-32-3p, miR-140-5p, miR-296-3p, miR-193b-3p, miR-377-3p, miR-2284s, novel\_25, novel\_32, miR-22-3p, miR-2285c, miR-411, miR-129b-3p, miR-3184-3p, miR-3074-5p, miR-539-5p, miR-214, miR-665-5p, miR-224-5p, miR-19b-1-5p, miR-664a, miR-708-5p, miR-129-5p, novel\_78, miR-27a-3p, miR-181b-2-3p, miR-147a, miR-421, miR-2285e, miR-2459, miR-9788-3p, miR-541, miR-329-3p, miR-30b-3p, miR-1388-5p, miR-362-3p, miR-23a-3p, miR-3187-3p, miR-8485, miR-342, miR-362-3p, miR-1185-5p, miR-542-5p, miR-214-3p, miR-27a-3p, miR-203-3p, miR-140-5p, novel\_94, miR-541-3p, miR-32-3p, miR-3050-5p, miR-194b-

miR-2285f, miR-382-3p, miR-335, miR-10b, miR-2319b, miR-4792, miR-211-5p, miR-7977, miR-2483-3p, miR-3596, miR-378g, miR-27a-3p, miR-129b-5p, miR-668-5p, miR-136-5p, miR-493-5p, miR-101b-3p, miR-2330-5p, miR-382-3p, let-7c-3p, miR-30c-1-3p, novel\_103, miR-182-5p, miR-362-3p, miR-2957, miR-25-5p, miR-491-5p, miR-542-5p, miR-409b, miR-27a-3p, miR-329-3p, miR-758-3p, miR-1a-3p, miR-101a-5p, miR-362-3p, miR-3120-5p, miR-21b, miR-3184-3p, miR-206-3p, miR-6525, miR-665, miR-664a-5p, miR-655-3p, miR-155-5p, miR-129-5p, miR-874-5p, miR-221-5p, miR-30c-1-3p, miR-182-5p, miR-3065-3p, miR-216b-3p, miR-216b-5p, miR-377-3p, miR-6516, miR-155-5p, miR-151b, miR-655, miR-2312, miR-133b-3p, let-7g-3p, miR-195a-3p, miR-421-5p, miR-376a-5p, miR-26a-5p, miR-542-5p, miR-125b, miR-324-3p, miR-21-3p, miR-221-5p, miR-548e-3p, miR-7859, miR-151-5p, miR-362-3p, miR-1197-5p, miR-5703, miR-140-3p, miR-218-1-3p, miR-133a-3p, miR-335-5p, miR-542-5p, miR-2285x, novel\_101, miR-29c-3p, miR-24-3p, miR-211, miR-29a, miR-206, miR-6119-3p, miR-421-5p, miR-22-5p, miR-26b-5p, miR-29a-3p, miR-669, miR-6535, miR-2387, miR-2285ab, miR-493-5p, miR-432-3p, miR-654-3p, miR-377-3p, miR-125a-5p, miR-185-5p, miR-134-3p, miR-197-3p, miR-29b, miR-27b-3p, miR-103b, miR-133a-3p, miR-1197-3p, miR-29b-3p, miR-409-3p, miR-3969, miR-125b-5p, novel\_9, miR-204-5p, miR-3068-3p, miR-125a, miR-331-5p, miR-329a, miR-10b-3p, miR-4286, miR-181a-2-3p, miR-1, miR-1271-3p, miR-490-3p, miR-3065-3p, miR-30c-2-3p, miR-127-5p, novel\_96, miR-6517, miR-7641, miR-6516-5p, miR-302a-5p, miR-29d-3p, miR-155-5p

GPR50 ENSOARGO(melatonin): miR-2404, miR-25, miR-29a-3p, miR-324-5p, miR-204-3p, miR-452-3p, miR-3065-3p, miR-2355-5p, miR-7977, miR-3120-3p, miR-767, miR-450b-3p, miR-361-3p, miR-3154, miR-361-3p, miR-1260b, miR-1197-3p, miR-2447, miR-541-3p, miR-145a-3p, miR-1839-3p, miR-29c-3p, miR-767-5p, miR-29a, miR-6123, miR-29b-3p, miR-410-5p, miR-615, miR-324-3p, miR-3969, miR-425-5p, miR-505-5p, miR-1298-3p, miR-532-3p, miR-2285ad, novel\_78, miR-29b, miR-1260b, miR-615-3p, miR-541, miR-29d-3p, miR-3065-3p, miR-3187-3p, miR-1839-3p, miR-181a-2-3p, miR-1260a, miR-210-5p, miR-324-3p, miR-185-3p, novel\_51

HEMK1 ENSOARGO(HemK met): miR-370-3p, miR-1271, miR-660-5p, miR-133b-5p, miR-134-5p, miR-1343-5p, miR-217-5p, miR-708-3p, miR-134, miR-503-3p, miR-625-5p, miR-671-5p, miR-329b, miR-16-1-3p, miR-17-3p, miR-217, miR-3604, miR-660, miR-1343-5p, novel\_96, miR-134-5p, miR-17-3p, miR-491-5p, miR-17-3p

VDAC2 ENSOARGO(voltage):

|       |                   |                                                                                                                                                                                                                                                                                                                                                                                                                                                                                                                                                                                                                                                                                                                                                                                                                                                                                                                                                                                                                                                                    |
|-------|-------------------|--------------------------------------------------------------------------------------------------------------------------------------------------------------------------------------------------------------------------------------------------------------------------------------------------------------------------------------------------------------------------------------------------------------------------------------------------------------------------------------------------------------------------------------------------------------------------------------------------------------------------------------------------------------------------------------------------------------------------------------------------------------------------------------------------------------------------------------------------------------------------------------------------------------------------------------------------------------------------------------------------------------------------------------------------------------------|
|       |                   | miR-2428, miR-361-3p, miR-3956-3p, novel_60, miR-301a-5p, miR-16a, miR-101-3p, miR-6529b, miR-15a, miR-4443, miR-320b, miR-195a-5p, miR-1291, miR-18a-3p, miR-1306, miR-2387, miR-361-3p, miR-4532, miR-424-5p, miR-101b-3p, miR-130b-5p, miR-491-5p, miR-16b, miR-1306-5p, miR-9788-3p, miR-455-3p, miR-3431, miR-185-5p, miR-2300a-5p, miR-409b, miR-31-5p, miR-16-2-3p, miR-101c, miR-497-5p, miR-4508, miR-1260b, miR-16b, miR-197-3p, miR-412-3p, miR-542-3p, miR-301b-5p, miR-2113, miR-                                                                                                                                                                                                                                                                                                                                                                                                                                                                                                                                                                     |
| RXRB  | ENSOARGO(retinoid | 484, miR-6134, miR-1260b, miR-6525, miR-16-5p, miR-3184-3p, novel_42, miR-590-3p, miR-1306-5p, miR-130b-5p, miR-424-5p, miR-664a, miR-665, miR-6740-5p, miR-331-3p, miR-877-5p, miR-15b-5p, miR-3957, novel_32, miR-3065-3p, miR-874-3p, miR-221-5p, miR-3957-5p, miR-7144-5p, miR-23a-5p, miR-21a-3p, miR-490-3p, miR-3065-3p, miR-148b-5p, miR-376a-5p, novel_127, novel_96, miR-221-5p, miR-324-3p, miR-1260a, miR-532-3p, miR-15a-5p, miR-322-5p, miR-412, miR-3600, miR-6517, miR-18a-3p, miR-2300b-3p miR-376e-3p, miR-376c-3p, miR-874-3p, miR-361-3p, miR-18a-3p, miR-1197-3p, miR-6134, miR-214, miR-486b-3p, miR-6529b, novel_82, miR-2285n, miR-185-5p, miR-149-5p, miR-194-                                                                                                                                                                                                                                                                                                                                                                            |
| BSG   | ENSOARGO(basigin  | 3p, miR-18a-3p, miR-26b-3p, miR-412, miR-7862, miR-193b-5p, miR-323b, miR-412-3p, miR-2904, miR-376c-3p, miR-486-3p, miR-652-5p, let-7c-3p, miR-191-3p, miR-214-3p, novel_127, miR-30b-3p, miR-185-3p, miR-323b-3p let-7g-3p, miR-329a, miR-3074-1-3p, miR-671-5p, miR-485-5p, miR-320a, miR-34c-5p, miR-300-3p, miR-3959-5p, miR-769, miR-574-5p, miR-370-3p, miR-592, miR-28-5p, miR-370-5p, miR-323-3p, miR-582-3p, miR-128-3p, let-7a-2-3p, miR-3578, miR-302a-5p, miR-483-3p, miR-152-3p, novel_127, miR-2285af, miR-205-5p, miR-217, miR-28b, miR-29a-5p, miR-3064-5p, miR-29b-2-5p, miR-181a-2-3p, miR-1291, miR-9851-3p, miR-2285ab, miR-148a-3p, miR-1306, miR-3065-5p, miR-18a-3p, miR-216a-3p, miR-411b-3p, miR-34b, miR-7-1-3p, miR-3120-3p, miR-502b, miR-6402, miR-6529b, miR-28c, miR-34c, miR-33a-3p, miR-449a, novel_27, miR-2428, miR-2284w, miR-135a-2-3p, miR-342-3p, miR-495-3p, novel_101, miR-1193, miR-542-3p, miR-197-3p, miR-3071-5p, novel_23, miR-145a-5p, miR-2285g, miR-6238, miR-483-3p, miR-377-3p, let-7a-2-3p, miR-382, miR-668- |
| GOLM1 | ENSOARGO(golgi me | 3p, miR-363-5p, miR-101-5p, let-7g-3p, miR-2312, miR-1827, miR-21a-3p, miR-2285c, miR-377-3p, miR-6130, miR-877-5p, miR-2331-3p, miR-545-3p, miR-370-5p, miR-664a, miR-4492, miR-708-5p, miR-665, miR-29b-2-5p, miR-338-5p, miR-769-5p, miR-4510, miR-214, miR-4429, miR-34a-5p, miR-362-3p, miR-2904, miR-5703, miR-140-3p, miR-217-5p, miR-7859, miR-148b-3p, miR-2284h-5p, miR-18a-3p, miR-548e-3p, miR-34b-5p, miR-21-3p, miR-210-5p, miR-216a-5p, miR-3601, miR-500a-5p, miR-29b-1-5p, miR-125b-2-3p, miR-2432, miR-143-3p, miR-2285w, miR-9-3p, miR-3082-5p, miR-3064-5p, miR-20a-3p, miR-452-3p, miR-126b-5p, miR-499a-5p, novel_82, miR-2440, miR-769-5p, miR-371a-5p, miR-2285f, miR-219a-5p, miR-362-3p, miR-101a-5p, miR-329-3p, miR-216a-3p, miR-2285e, miR-421, miR-145b, miR-3085-3p, miR-214-3p, miR-342, miR-320b, miR-1306-5p, novel_103, miR-362-3p, miR-29b-1-5p, miR-652-5p, miR-744-3p                                                                                                                                                        |

miR-124a, miR-382-3p, miR-2284b, miR-652-5p, miR-193a, miR-2310, miR-320b, miR-491-5p, miR-130b-3p, miR-487b-5p, miR-103a-2-5p, miR-330-3p, miR-27a-3p, miR-145b, miR-425-3p, miR-539-5p, miR-216a-3p, miR-148b-5p, miR-455-3p, miR-296-5p, miR-301b-5p, miR-544a, miR-16-2-3p, miR-3059-5p, miR-2447, miR-212-3p, miR-194b-5p, miR-877-3p, miR-2285n, miR-107-5p, miR-301a-5p, miR-2284g, miR-139-5p, miR-2319b, miR-126b-5p, miR-3596, miR-27a-3p, miR-335-3p, miR-664b-3p, miR-130a-5p, miR-3601, miR-500a-5p, miR-185-3p, miR-320d, miR-466i-5p, miR-30b-3p, miR-548e-3p, miR-3600, miR-485-3p, miR-487a-3p, miR-200b, miR-2904, miR-124-3p, miR-1197-5p, miR-5703, miR-1193, miR-4429, novel\_73, miR-16-1-3p, miR-2284u, miR-590-3p, miR-2330-3p, miR-6525, miR-122-5p, miR-6134, miR-19b-1-5p, miR-320e, novel\_74, miR-155-5p, miR-487b-5p, miR-17-3p, miR-708-5p, miR-454-3p, miR-140-5p, miR-548o-3p, miR-370-5p, miR-544-3p, miR-301a-3p, miR-139-5p, miR-204-3p, miR-155-5p, miR-877-5p, miR-655, miR-30d-5p, miR-345-5p, miR-625-5p, novel\_99, miR-6240, miR-628-5p, miR-539-3p, miR-503-3p, miR-345-5p, miR-330-3p, miR-194a, miR-665, miR-130a-3p, miR-2284d, miR-149-5p, miR-6238, miR-194-3p, miR-544b, miR-873a-5p, miR-19b-2-5p, miR-1434-3p, miR-197-3p, novel\_23, miR-194-5p, miR-3071-5p, miR-145a-5p, miR-21-5p, miR-2284ab, miR-16-1-3p, miR-26a-2-3p, miR-27b-3p, miR-17-3p, miR-495-3p, miR-1193, miR-2285x, miR-323c, novel\_27, miR-301b-3p, miR-2428, miR-1247-3p, miR-576-3p, miR-379-3p, miR-147-5p, miR-378b, miR-146b-3p, miR-320c, miR-2387, miR-21c, miR-216a-3p, miR-2319a, miR-2403, miR-181a-2-3p, novel\_39, miR-29a-5p, miR-2284y, miR-2284a, miR-2285b, miR-125a-3p, miR-200c, miR-6119-5p, miR-30f, miR-17-3p, miR-6536, miR-200c-3p, novel\_96, miR-429-3p, miR-30a-5p, miR-411-3p, miR-200b-3p, miR-155-5p, miR-128-3p, miR-2284v, miR-3607-3p, miR-

miR-128-1-5p, miR-199c, miR-28c, miR-133a-5p, miR-326-3p, miR-2284w, miR-135a-2-3p, miR-335-5p, miR-758-5p, miR-1291, miR-19a-3p, miR-107, miR-6395, miR-216a-3p, miR-378b, miR-670-3p, miR-669, novel\_68, miR-320b, miR-196b-5p, miR-1343-5p, miR-7-5p, miR-105-5p, miR-330-3p, novel\_51, miR-6240, miR-363-5p, miR-138, miR-4508, miR-7862, miR-432, miR-7b-5p, miR-22-3p, miR-450c-3p, novel\_23, miR-145a-5p, miR-432-5p, miR-412-5p, miR-134-3p, miR-3431, miR-185-5p, miR-411-5p, miR-149-5p, miR-103, miR-103a-3p, miR-138-5p, miR-28-5p, miR-134-5p, miR-486b-3p, miR-410-5p, miR-2433, miR-331-3p, miR-1197-3p, miR-10b-3p, miR-193a-5p, miR-2474, miR-7144-5p, miR-23a-5p, miR-485-5p, miR-3154, miR-365a-3p, miR-154b-5p, miR-574-5p, miR-2355-5p, miR-615-5p, miR-2898, miR-107, novel\_96, miR-30c-2-3p, miR-28b, novel\_39, miR-3956-5p, miR-490-3p, miR-105-2, miR-128-3p, miR-196a-5p, miR-134, miR-2427, miR-1343-5p, miR-330-5p, miR-505-5p, miR-9-5p, miR-302a-5p, miR-450a-1-3p, miR-134-5p, miR-582-3p, miR-545-5p, miR-412, miR-335, miR-2285t, miR-3964, miR-2440, miR-301a-5p, miR-877-3p, miR-423-5p, miR-541-3p, miR-1296-5p, miR-9-5p, miR-504, miR-361-3p, miR-378g, miR-3596, miR-3082-5p, miR-4443, miR-7977, miR-491-5p, miR-1185-5p, miR-25-5p, miR-326, miR-30c-1-3p, miR-376b, miR-2426, miR-450b-5p, miR-101c, miR-16-2-3p, miR-3120-5p, miR-296-5p, miR-301b-5p, miR-541, miR-143-5p, miR-412-3p, miR-758-3p, miR-147a, miR-148b-5p, miR-199b-3p, miR-105-1, novel\_78, miR-2300a-5p, miR-1343-3p, miR-330-3p, miR-145b, miR-450b-3p, miR-664a, miR-487a-5p, miR-708-5p, miR-874-5p, miR-4492, miR-664a-5p, miR-665, miR-3184-5p, miR-122-5p, miR-6134, miR-145a-3p, miR-4510, miR-665-5p, miR-2312, novel\_99, miR-450a-1-3p, miR-129b-3p, miR-6130, miR-22-3p, miR-2331-3p, miR-504-5p, miR-30c-1-3p, novel\_107, miR-296-3p, miR-552-3p, miR-760-3p, miR-30b-3p, miR-2285n, miR-92a-1-miR-124-3p, miR-378a-3p, miR-378b, miR-378i, miR-378c, miR-219a-1-3p, novel\_78, novel\_4, miR-2300a-5p, miR-194-3p, miR-214-5p, miR-134-3p, miR-378h, miR-503-5p, miR-185-3p, miR-422a, miR-503-5p, miR-196a-3p, miR-210-5p, miR-124a, miR-503-5p, novel\_39, miR-378d, miR-488-3p, miR-7144-5p, miR-378f, miR-1291, miR-370-3p, miR-378a-3p, miR-669, miR-378g, miR-378e, miR-6130, miR-1973, miR-320e, miR-665, miR-378c, miR-4510, miR-378c

SLC25A34 ENSOARGO(solute carrier)

CRAT ENSOARGO(carnitine)

miR-339-5p, miR-194-3p, miR-149-5p, miR-19b-2-5p, miR-7b-5p, miR-1843b-5p, miR-542-3p, miR-450c-3p, miR-22-3p, miR-197-3p, miR-27b-3p, miR-2285r, miR-432-3p, miR-432-3p, miR-7-5p, miR-377-3p, miR-296-3p, miR-105-5p, novel\_51, miR-2411-3p, miR-483-3p, novel\_68, miR-6535, miR-669, miR-320c, miR-3591-3p, miR-576-3p, miR-485-3p, novel\_87, miR-412, miR-1224-5p, novel\_79, miR-18b-5p, miR-9-5p, miR-450a-1-3p, miR-129-1-3p, miR-3591-5p, miR-2427, miR-330-5p, novel\_39, miR-2285b, miR-205-5p, miR-200a-3p, miR-99a-3p, miR-542-5p, miR-125a, miR-876-3p, miR-1248, novel\_42, miR-1260b, miR-181c-3p, miR-125b-5p, miR-100-3p, miR-548w, miR-145b, miR-147a, miR-2459, miR-758-3p, miR-1839-5p, miR-574-3p, miR-744-3p, miR-8485, miR-214-3p, miR-24-1-5p, miR-139-5p, miR-4443, miR-140-5p, miR-181a-3p, miR-504, miR-136-5p, miR-2447, miR-3956-3p, miR-885-5p, miR-9-5p, miR-361-3p, novel\_111, novel\_82, miR-218-5p, miR-2440, miR-328-3p, miR-193b-5p, miR-33b-3p, miR-184-3p, miR-133a-3p, miR-34a-5p, miR-503-5p, miR-345-3p, miR-2285i, miR-664b-3p, miR-486-3p, novel\_17, miR-3601, miR-324-3p, miR-92a-1-5p, miR-345-3p, miR-99a-3p, miR-2484, miR-504-5p, miR-30c-1-3p, miR-296-3p, miR-377-3p, miR-299, miR-450a-1-3p, miR-339b, miR-625-5p, miR-1895, miR-1827, miR-129-2-3p, miR-214, miR-6525, miR-769-5p, novel\_44, miR-224-5p, novel\_74, miR-487b-5p, miR-4492, miR-130b-5p, miR-133b-5p, miR-185-5p, miR-503-5p, miR-2355-3p, miR-1434-3p, miR-145a-5p, miR-138, miR-1260b, miR-455-5p, miR-130b-5p, miR-363-5p, miR-654-3p, miR-296-3p, miR-503-5p, miR-224-5p, miR-455-5p, miR-125a-5p, miR-466f-3p, miR-363, miR-323a-5p, miR-34b, miR-2387, miR-18b, miR-1291, miR-2285k, miR-6395, miR-342-3p, miR-3957-3p, novel\_101, miR-1193, miR-2285x, miR-371b-3p, miR-24-3p, novel\_27, miR-326-3p, miR-449a, miR-2428, miR-34c, novel\_1, miR-24-2-5p, miR-483-3p, miR-345-3p, miR-7134-

miR-378f, miR-146b-5p, miR-150-5p, miR-1306, miR-376b-5p, miR-6535, miR-26b-5p, miR-329-5p, novel\_68, miR-4324, miR-199b-5p, miR-193b-3p, miR-497-5p, miR-16b, novel\_23, miR-450c-3p, miR-22-3p, miR-1843b-5p, miR-7b-5p, miR-432, novel\_116, miR-149-5p, miR-3431, miR-103a-3p, miR-31-5p, miR-193a-3p, novel\_51, miR-2285v, miR-582, miR-146a, miR-7-5p, miR-628-5p, miR-493-5p, miR-6240, miR-1248, miR-20b-5p, miR-345-5p, miR-876-3p, miR-376c-5p, miR-93-5p, miR-301, miR-125a, miR-1271, miR-2355-5p, miR-874-3p, miR-3068-3p, miR-574-5p, miR-134-5p, miR-100-3p, miR-6740-5p, miR-125b-5p, miR-1197-3p, miR-1260b, miR-16-5p, miR-885-3p, miR-330-5p, miR-23b-5p, miR-1343-5p, miR-134-5p, miR-450a-1-3p, miR-505-5p, miR-9-5p, miR-322-5p, miR-1224-5p, miR-6517, miR-2285ad, novel\_96, novel\_127, miR-127-5p, miR-3071-3p, miR-2285b, miR-3956-5p, miR-3064-5p, miR-493-5p, miR-504, miR-500-3p, miR-3596, miR-211-5p, miR-24-1-5p, miR-490-5p, miR-3968, miR-499a-5p, miR-301a-5p, miR-2440, miR-218-5p, miR-423-5p, novel\_111, miR-361-3p, miR-9-5p, miR-2447, miR-101c, miR-501-3p, miR-301b-5p, miR-541, miR-2284r, miR-455-3p, miR-148b-5p, miR-1298-3p, miR-548w, miR-199b-3p, miR-330-3p, miR-1343-3p, miR-214-3p, miR-199b-5p, miR-146b, miR-491-5p, miR-16b, miR-106b-5p, miR-199a-3p, miR-378d, miR-2284b, miR-124a, miR-885-3p, miR-625-5p, miR-345-5p, miR-433-3p, miR-598-3p, miR-450a-1-3p, miR-15b-5p, miR-151b, miR-296-3p, miR-216b-3p, miR-2331-3p, miR-504-5p, miR-4492, miR-874-5p, miR-129-5p, miR-665, miR-122-5p, miR-3184-5p, miR-6525, miR-214, miR-34a-5p, miR-148a-5p, miR-133a-3p, miR-33b-3p, miR-142-3p, miR-378a-3p, miR-193b-5p, miR-378i, miR-210-3p, miR-106a, miR-18a-3p, miR-422a, miR-92a-1-5p, miR-3601, miR-500a-5p, miR-324-3p, miR-210-5p, novel\_17, miR-26a-5p, miR-486-3p, miR-142a-3p, miR-491-5p, miR-503-5p, miR-379-5p, miR-195a-5p, miR-6516-



miR-10a-5p, miR-329-5p, miR-144-3p, miR-29a-3p, miR-670-3p, miR-2404, miR-376b-3p, miR-21c, miR-216a-3p, miR-3591-3p, miR-3970, miR-150-5p, miR-1306, miR-18b, miR-148a-3p, miR-2285ab, miR-6516-3p, miR-146b-5p, miR-19a-3p, miR-410-5p, novel\_101, miR-17-3p, miR-29c-3p, miR-301b-3p, miR-2284w, novel\_27, miR-211, novel\_87, miR-382-5p, miR-6402, miR-3613, miR-502-5p, miR-4324, miR-502b, miR-147-5p, miR-421-5p, novel\_1, miR-29a, miR-130a-3p, miR-340-3p, miR-2355-3p, miR-544b, novel\_116, miR-412-5p, miR-432-5p, miR-3071-5p, novel\_23, miR-432, miR-27b-3p, miR-2889, miR-455-5p, miR-2284x, miR-26a-2-3p, miR-125b-1-3p, miR-1260b, miR-21-5p, miR-29b, miR-628-5p, miR-382, miR-2483-5p, miR-493-5p, miR-6240, miR-130b-5p, miR-503-3p, miR-2411-3p, miR-455-5p, miR-330-3p, miR-365b-5p, miR-146a, miR-224-5p, miR-660, miR-452-5p, miR-141-3p, miR-223-5p, miR-374c-3p, miR-18a, miR-503-3p, miR-301, miR-1814c, miR-3074-1-3p, miR-144-5p, miR-28a-3p, miR-365a-5p, miR-1197-3p, miR-1260b, miR-144, miR-5100, miR-29b-3p, miR-34c-3p, miR-204-5p, miR-134-5p, miR-592, miR-18b-5p, miR-582-3p, miR-134-5p, miR-545-5p, miR-758-5p, miR-1271-5p, miR-6516-5p, miR-24-2-5p, miR-9-5p, miR-505-5p, miR-501-3p, miR-29d-3p, miR-3578, miR-134, miR-345-3p, miR-10a-5p, miR-128-3p, miR-582-3p, miR-181a-2-3p, miR-29b-2-5p, miR-30a-3p, miR-3065-3p, miR-200a, miR-450b-5p, miR-217, miR-376b-3p, miR-1260a, miR-200a-3p, miR-152-3p, miR-6536, miR-127-5p, miR-28-3p, miR-17-3p, miR-211-5p, miR-20a-3p, miR-452-3p, miR-139-5p, miR-500-3p, miR-27a-3p, miR-376d, miR-7857-3p, miR-378j, miR-129b-5p, novel\_94, miR-376a-3p, miR-335-3p, miR-493-5p, miR-96-5p, miR-9-5p, miR-2285f, miR-885-5p, miR-154a, miR-1285-5p, miR-502-3p, novel\_111, miR-877-3p, miR-101-3p, miR-2440, miR-218-5p, miR-2285t, miR-2968, miR-1726-5p, miR-27a-3p, miR-138-5p, miR-28-5p, miR-874-5p, miR-708-5p, miR-5100, miR-2433, miR-664a-5p, miR-665, miR-125b-5p, miR-1197-3p, miR-6525, miR-145-3p, miR-365a-5p, miR-3074-5p, miR-4510, miR-539-5p, miR-214, miR-1271, let-7g-3p, let-7g-3p, miR-485-5p, miR-885-3p, miR-3154, miR-6130, miR-193b-3p, miR-125a, miR-3956, miR-615-5p, miR-760-3p, miR-450a-2-3p, miR-21-3p, novel\_96, novel\_17, miR-542-5p, miR-26a-5p, miR-2285af, miR-125b, miR-185-3p, miR-500a-5p, miR-142a-3p, miR-490-3p, miR-3956-5p, miR-143-3p, miR-2285b, miR-2411, miR-146a-5p, miR-885-3p, let-7a-2-3p, miR-193b-5p, miR-140-3p, miR-1193, miR-5703, miR-1343-5p, miR-2411-5p, miR-1271-5p, miR-6517, miR-6123, miR-361-3p, miR-542-5p, miR-193b-3p, miR-6527, miR-96-5p, miR-146b-5p, miR-361-3p, miR-1306, novel\_69, miR-6535, miR-3074-5p, miR-378b, miR-4792, novel\_68, miR-26b-5p, miR-124-5p, miR-491-5p, miR-214-3p, miR-193a-3p, miR-542-5p, miR-146b, miR-452-5p, miR-1343-5p, miR-125a-5p, miR-146a, novel\_103, miR-1306-5p, miR-365b-5p, miR-432-3p, let-7a-2-3p, miR-138, miR-30b-3p, miR-4508, miR-873a-5p, miR-708-3p, miR-296-5p, miR-30b-3p, miR-3962, miR-142-3p, miR-185-5p, miR-147a, miR-9788-3p, novel\_4

miR-668-3p, miR-2483-5p, miR-34b-5p, miR-432-3p, miR-432-3p, novel\_51, miR-2411-3p, miR-455-5p, miR-452-5p, miR-466f-3p, miR-124-5p, miR-2285l, miR-187-3p, miR-31-5p, miR-194-3p, miR-2355-3p, miR-185-5p, miR-343l, novel\_23, miR-145a-5p, miR-653, miR-542-3p, miR-455-5p, miR-2284x, miR-30b-3p, miR-219a-1-3p, miR-1260b, miR-219b-3p, miR-1a-1-5p, novel\_27, miR-2428, miR-199b-5p, miR-24-3p, miR-371b-3p, miR-1247-3p, miR-656-5p, miR-625-3p, miR-199c, novel\_1, miR-3120-3p, miR-144-3p, miR-320c, miR-669, miR-374c-3p, miR-299b-3p, miR-18a-3p, miR-6516-3p, miR-29b-2-5p, miR-199a-5p, novel\_39, miR-30c-2-3p, miR-1260a, miR-2285af, miR-200c, miR-219-3p, miR-543-5p, novel\_127, novel\_96, miR-200c-3p, miR-1a-2-5p, miR-299a-3p, miR-429-3p, miR-134-5p, miR-2284z, miR-6516-5p, miR-345-3p, miR-3591-5p, miR-134, miR-1290, miR-200b-3p, miR-496, miR-6128, miR-3607-3p, miR-1306-5p, miR-323-3p, miR-1260b, miR-144, miR-1-5p, miR-2284k, miR-486b-3p, miR-134-5p, miR-331-5p, miR-487a-3p, miR-503-3p, miR-199a-5p, miR-331-5p, miR-200a-5p, miR-3154, miR-320a, miR-331-5p, miR-503-3p, miR-10b-3p, miR-345-5p, miR-1388-3p, miR-101b-3p, miR-8485, miR-193a, miR-3187-3p, miR-30c-1-3p, miR-29b-1-5p, miR-2957, miR-320b, novel\_115, miR-199b-5p, miR-153-3p, miR-491-5p, miR-3955-3p, miR-145b, miR-222-5p, miR-199b-3p, miR-2300a-5p, miR-455-3p, miR-9788-3p, miR-216a-3p, miR-126a-5p, miR-153, miR-30b-3p, miR-484, miR-296-5p, miR-1298-5p, miR-101c, miR-2284aa, miR-1388-5p, miR-2426, miR-101a-5p, miR-2284j, miR-2447, miR-885-5p, miR-219a-2-3p, miR-361-3p, novel\_111, miR-371a-5p, miR-2285y, miR-2285t, miR-154-3p, miR-2284q, miR-541-5p, miR-139-5p, miR-10b, miR-2319b, miR-452-3p, miR-499a-3p, miR-361-3p, miR-199b-5p, miR-9-3p, miR-183-5p, miR-487a, miR-486-3p, miR-376a-5p, miR-29b-1-5p, miR-130a-5p, miR-

miR-329-3p, miR-362-3p, miR-21b, miR-101c, miR-330-3p, miR-145b, miR-199a-3p, miR-16b, miR-29b-1-5p, miR-214-3p, miR-2310, miR-8485, miR-668-5p, miR-299b-5p, miR-96-5p, miR-2319b, miR-2284g, miR-2285u, miR-144-5p, novel\_82, miR-3956-3p, miR-2447, miR-2284j, miR-361-3p, miR-877-3p, miR-193b-5p, miR-2366, miR-493-3p, miR-2284u, miR-133a-3p, miR-212-5p, miR-328-3p, miR-2284h-5p, miR-1247-5p, miR-2285p, miR-324-3p, miR-2285w, miR-329a-5p, miR-345-3p, miR-376c-3p, miR-377-5p, miR-143-3p, miR-450a-1-3p, miR-299, miR-655, miR-598-3p, miR-339b, miR-543-3p, miR-548o-3p, miR-30c-1-3p, miR-216b-3p, miR-216b-5p, miR-377-3p, miR-582-5p, miR-10a, miR-376e-3p, miR-15b-5p, miR-2285j, miR-3604, miR-665, novel\_74, miR-3074-5p, miR-129-2-3p, miR-214, miR-3958-5p, miR-224-5p, miR-1843b-5p, miR-19b-2-5p, miR-450c-3p, miR-197-3p, miR-16b, miR-188-5p, miR-2284x, miR-497-5p, miR-339-5p, miR-3535, miR-149-5p, miR-377-3p, miR-105-5p, miR-3141, miR-378a-5p, miR-6240, miR-2284l, let-7a-2-3p, miR-3141, miR-376b-5p, miR-3591-3p, miR-3970, miR-150-5p, miR-1306, miR-2284e, miR-410-5p, miR-216b-3p, miR-3074-5p, miR-329-5p, miR-411b-3p, miR-669, miR-320c, miR-6535, miR-142b, novel\_87, miR-2284o, miR-379-3p, miR-29a, miR-6119-3p, miR-29c-3p, miR-2284w, miR-1290, miR-330-5p, novel\_79, miR-322-5p, miR-129-1-3p, miR-450a-1-3p, miR-127-5p, miR-2284f, miR-450b-5p, miR-376c-5p, miR-329a, miR-503-3p, miR-3956, miR-300-3p, miR-376c-3p, miR-2284k, miR-2284v, miR-144-5p, miR-16-5p, miR-4791, miR-10b, miR-484, miR-30b-3p, miR-2300a-5p, miR-105-1, miR-409b, miR-216a-3p, miR-500-5p, miR-1306-5p, miR-326, miR-320b, miR-362-3p, miR-2957, miR-424-5p, miR-652-5p, miR-33a-5p, miR-30c-1-3p, miR-4532, miR-3187-3p, miR-499b-5p, miR-541-5p, miR-2285n, miR-4726-5p, miR-212-3p, novel\_60, miR-3059-5p, miR-362-5p, miR-154a, miR-8095, miR-362-3p, miR-2408, miR-1107-5p, miR-

SH3GLB2 ENSOARGO(SH3)-doma

miR-200c-3p, miR-191-3p, miR-200c, miR-490-3p, miR-29a-5p, miR-2403, miR-3064-5p, miR-200b-3p, miR-615-3p, miR-330-5p, miR-2427, miR-6516-5p, miR-322-5p, miR-450a-1-3p, miR-2284z, miR-429-3p, miR-486b-3p, miR-28-5p, miR-410-5p, miR-125b-5p, miR-1197-3p, miR-365a-5p, miR-16-5p, miR-485-5p, miR-424-3p, miR-3959-5p, miR-324-5p, miR-874-3p, miR-574-5p, miR-125a, miR-125a-5p, miR-660, miR-365b-5p, miR-363-5p, miR-219a-1-3p, miR-16b, miR-30b-3p, miR-744-5p, miR-497-5p, miR-4508, miR-223-3p, miR-708-3p, miR-450c-3p, miR-134-3p, miR-544b, miR-26b-3p, miR-576-3p, miR-15a, miR-16a, miR-24-3p, miR-326-3p, miR-1291, miR-195a-5p, miR-1306, novel\_69, miR-329-5p, novel\_68, miR-320b, miR-196a-3p, miR-92a-1-5p, miR-185-3p, miR-125b, miR-324-3p, miR-130a-5p, miR-486-3p, miR-329a-5p, miR-2366, miR-1193, miR-1197-5p, miR-200b, miR-15a-5p, miR-616-3p, miR-151-5p, miR-450b-3p, miR-424-5p, miR-4492, miR-708-5p, miR-665, miR-338-3p, miR-4510, miR-582-5p, miR-450a-1-3p, miR-139-5p, miR-6130, miR-582-5p, miR-6516, miR-544-3p, miR-15b-5p, miR-151b, miR-204-3p, miR-660-5p, miR-2331-3p, miR-504-5p, miR-296-3p, miR-3085-3p, miR-326, miR-1306-5p, miR-16b, miR-4532, miR-424-5p, miR-2330-5p, miR-1388-3p, miR-544a, miR-3120-5p, miR-2284aa, miR-296-5p, miR-2284r, miR-484, miR-30b-3p, miR-147a, miR-425-3p, novel\_4, novel\_78, miR-615, miR-382-3p, novel\_82, miR-877-3p, miR-2447, miR-452-5p, miR-136-5p, miR-504, novel\_94, miR-3082-5p, miR-378g, miR-2319b, miR-4792, miR-3064-5p, miR-139-5p, miR-499b-5p, miR-7689-3p

miR-127-5p, novel\_96, miR-152-3p, novel\_127, miR-148b-5p, miR-450c-5p, miR-155-5p, miR-23b-5p, miR-1343-5p, miR-2427, miR-758-5p, miR-505-5p, miR-134-5p, miR-6517, miR-429-3p, miR-299a-3p, miR-2285ad, novel\_79, miR-1224-5p, miR-134-5p, miR-2433, miR-125b-5p, miR-6740-5p, miR-345-5p, miR-2474, miR-300-3p, miR-874-3p, miR-503-3p, miR-125a, miR-2285aa, miR-2355-5p, miR-106b-3p, miR-296-3p, miR-7-5p, novel\_51, miR-2411-3p, miR-3141, miR-432-3p, let-7a-2-3p, miR-380-5p, miR-628-5p, let-7f-2-3p, let-7f-2-3p, miR-1843b-5p, miR-7b-5p, miR-3431, miR-134-3p, miR-194-3p, miR-31-5p, miR-339-5p, miR-29a, miR-142b, miR-28c, miR-4324, miR-1247-3p, miR-199b-5p, miR-335-5p, miR-29c-3p, miR-378f, miR-3141, miR-148a-3p, miR-3591-3p, miR-3065-5p, miR-3970, miR-299b-3p, miR-6535, novel\_17, miR-345-3p, miR-122-3p, miR-422a, miR-324-3p, miR-377-5p, miR-486-3p, miR-34a-5p, miR-133a-3p, miR-2366, miR-378i, miR-378a-3p, miR-18a-3p, miR-4492, miR-874-5p, miR-500, miR-2285j, miR-665, miR-214, miR-665-5p, miR-345-5p, miR-339b, miR-1827, miR-1895, miR-411, miR-129b-3p, miR-500a-3p, miR-10a, miR-30c-1-3p, miR-2331-3p, miR-504-5p, miR-491-5p, miR-214-3p, miR-199b-5p, miR-378d, miR-124a, miR-676-3p, miR-1388-5p, miR-2284r, miR-758-3p, miR-147a, miR-1185-3p, miR-2459, miR-455-3p, novel\_78, miR-499a-5p, miR-2440, miR-877-3p, miR-361-3p, miR-2447, miR-504, miR-409-5p, miR-378g, miR-4443, miR-1185-2-3p, miR-2319b, miR-2285u, miR-200c-3p, miR-17-3p, miR-543-5p, miR-6119-5p, miR-200c, miR-339a, miR-30c-2-3p, miR-380-5p, miR-28b, miR-490-3p, miR-199a-5p, miR-3065-3p, miR-4286, miR-495-5p, miR-496, let-7a-2-3p, miR-10a-5p, miR-134, miR-345-3p, miR-218-2-3p, miR-29d-3p, miR-378h, miR-6516-5p, miR-214-5p, miR-582-3p, miR-7641, miR-138-5p, miR-28-5p, miR-486b-3p, miR-29b-3p, miR-551b-3p, miR-135a-5p, miR-3069, miR-26c, miR-378c, miR-1306-

miR-184-3p, miR-133a-3p, miR-378d, miR-34a-5p, miR-362-3p, miR-2904, miR-1197-5p, miR-140-3p, miR-1193, miR-5703, miR-532-3p, miR-151-5p, miR-760-3p, miR-34b-5p, miR-21-3p, miR-196a-3p, miR-185-3p, miR-376c-3p, miR-377-5p, miR-2411, miR-486-3p, miR-143-3p, miR-216c-5p, miR-5100, miR-2887, let-7g-3p, miR-133b-3p, miR-345-5p, miR-1895, miR-885-3p, miR-625-5p, novel\_99, miR-1827, miR-21a-3p, miR-450a-1-3p, miR-129b-3p, miR-376e-3p, miR-544-3p, miR-151b, miR-30c-1-3p, miR-2331-3p, miR-370-5p, miR-552-3p, miR-450b-3p, miR-664a, miR-17-3p, miR-874-5p, miR-1468-5p, miR-208b-5p, miR-4492, miR-2285j, miR-324-3p, miR-338-5p, miR-665, miR-6525, miR-3184-5p, miR-6134, miR-338-3p, miR-3958-5p, miR-214, miR-2330-3p, miR-665-5p, miR-3074-2-3p, miR-362-3p, miR-544a, miR-2426, miR-101c, miR-329-3p, miR-296-5p, miR-6529a, miR-143-5p, miR-541, miR-4791, miR-501-3p, miR-412-3p, miR-7857, miR-125b-2-3p, miR-30b-3p, miR-2459, miR-105-1, miR-2300a-5p, novel\_4, miR-1343-3p, miR-5010-3p, miR-3085-3p, novel\_124, miR-491-5p, miR-103a-2-5p, miR-214-3p, miR-1468, miR-1306-5p, novel\_103, miR-326, miR-362-3p, novel\_19, miR-30c-1-3p, miR-4532, miR-491-3p, miR-1388-3p, let-7c-3p, miR-33a-5p, miR-136-5p, novel\_94, miR-361-3p, miR-378g, miR-489, miR-4443, miR-500-3p, miR-4792, miR-3064-5p, miR-2319b, miR-452-3p, miR-211-5p, miR-7977, miR-4726-5p, miR-2285t, novel\_82, miR-2285n, miR-1973, miR-107-5p, miR-361-3p, miR-423-5p, miR-502-3p, miR-3059-5p, miR-541-3p, miR-9-5p, miR-885-3p, miR-105-2, miR-1290, miR-1343-5p, miR-218-2-3p, miR-330-5p, miR-23b-5p, miR-501-3p, miR-9-5p, miR-505-5p, miR-24-2-5p, miR-758-5p, miR-2411-5p, miR-450a-1-3p, miR-412, miR-17-3p, miR-2898, miR-127-5p, miR-543-5p, novel\_96, miR-1260a, miR-30c-2-3p, novel\_39, miR-29a-5p, miR-2285b, miR-1271-3p, miR-3064-5p, miR-2285-3p, miR-

miR-432, miR-450c-3p, miR-22-3p, miR-1260b, miR-30b-3p, miR-138, miR-16b, miR-7862, miR-2889, miR-497-5p, miR-133b-5p, miR-26b-3p, miR-134-3p, miR-503-5p, miR-3431, miR-432-5p, miR-2355-3p, miR-149-5p, miR-503-5p, miR-2411-3p, miR-330-3p, miR-378a-5p, miR-125a-5p, miR-1343-5p, miR-6240, miR-363-5p, miR-101-5p, miR-432-3p, miR-654-3p, miR-2285r, miR-2387, miR-18a-3p, miR-150-5p, miR-1306, miR-1291, miR-195a-5p, miR-3074-5p, novel\_68, miR-320b, miR-34b, miR-669, miR-4324, miR-15a, miR-382-5p, miR-34c, miR-16a, novel\_1, miR-128-1-5p, miR-203b-5p, miR-421-5p, miR-335-5p, miR-1307-3p, miR-449a, miR-374c-5p, miR-345-3p, miR-30a-5p, miR-23b-5p, miR-1343-5p, miR-7134-5p, miR-885-3p, miR-6517, miR-431, miR-7641, miR-1224-5p, miR-505-5p, miR-322-5p, miR-24-2-5p, miR-214-5p, miR-450a-1-3p, miR-1260a, miR-30c-2-3p, novel\_96, miR-543-5p, miR-200a-3p, novel\_127, miR-4286, miR-3064-5p, miR-24-2-5p, miR-148b-5p, miR-1271-3p, miR-3065-3p, novel\_39, miR-301, miR-30e-5p, miR-1248, miR-874-3p, miR-1271, miR-141-3p, miR-125a, miR-615-5p, miR-370-3p, miR-2355-5p, miR-365a-3p, miR-769, miR-34c-5p, miR-133c, miR-2332, miR-2433, miR-125b-5p, miR-138-5p, miR-486b-3p, miR-28-5p, miR-31-3p, miR-1306-5p, novel\_42, miR-16-5p, miR-193a-5p, miR-1260b, miR-181c-3p, miR-301b-5p, miR-541, miR-296-5p, miR-6529a, miR-30b-3p, novel\_78, miR-330-3p, miR-2300a-5p, miR-147a, miR-455-3p, novel\_103, miR-1306-5p, miR-5126, miR-431-5p, miR-16b, miR-29b-1-5p, miR-25-5p, miR-491-5p, miR-3085-3p, miR-214-3p, miR-424-5p, miR-652-5p, miR-30c-1-3p, miR-3187-3p, miR-409-5p, miR-361-3p, miR-140-5p, miR-129b-5p, miR-147-3p, miR-181a-3p, miR-24-1-5p, miR-3064-5p, miR-7977, miR-7689-3p, miR-489, miR-378g, miR-4443, miR-652-3p, miR-301a-5p, miR-2285y, miR-769-5p, miR-335, miR-4726-5p, miR-541-3p, miR-361-3p, miR-877-3p, miR-193b-5p, novel\_133, miR-1197-5p, miR-33b-3p, miR-541-5p, miR-7-1-3p, miR-20a-3p, miR-144-3p, miR-320c, miR-2483-3p, miR-3065-5p, miR-1983, miR-9-3p, miR-412-3p, miR-194b-5p, miR-1a-1-5p, miR-8095, miR-219a-2-3p, miR-371a-5p, miR-133a-5p, miR-576-3p, miR-490-5p, miR-625-3p, miR-330-3p, miR-151a-3p, miR-194-3p, miR-421, miR-412-5p, miR-194-5p, miR-708-3p, let-7c-3p, miR-376b, miR-6240, miR-539-3p, miR-1b-5p, miR-654-3p, miR-30c-1-3p, miR-330-3p, miR-194a, miR-320b, miR-224-5p, miR-466f-3p, miR-2285aa, miR-30c-1-3p, miR-2331-3p, miR-300-3p, miR-200a-5p, miR-129b-3p, miR-320a, miR-23a-5p, novel\_99, let-7g-3p, miR-539-5p, miR-224-5p, miR-144, miR-151-3p, miR-3969, miR-1-5p, miR-487a-5p, novel\_9, miR-485-3p, novel\_121, miR-1246, miR-4429, miR-490-3p, miR-2285b, miR-125b-2-3p, miR-30c-2-3p, miR-216a-5p, miR-196a-3p, miR-2285p, miR-219-3p, miR-320d, miR-1a-2-5p, miR-9-3p, miR-142-3p, miR-4429, miR-320a, miR-503-3p, miR-2300b-3p, miR-486-5p, miR-320c, miR-222-5p, miR-411b-3p, miR-670-3p, miR-5010-3p, miR-3065-3p, miR-330-3p, novel\_96, miR-147-5p, miR-625-3p, miR-491-5p, miR-330-3p, miR-320b, miR-2428, miR-3065-3p, miR-148b-5p, miR-668-3p, miR-494-3p, miR-6240

MRPL38 ENSOARGO(mitochon

HNRNPLL ENSOARGO(heteroge

SLC28A3 ENSOARGO(solute c

miR-381-3p, miR-18a-3p, miR-378f, miR-9-3p, miR-379-5p, miR-2319a, miR-504, miR-3120-3p, miR-378b, miR-452-3p, miR-664b, miR-320c, miR-29a-3p, miR-2404, miR-378e, novel\_87, miR-22-5p, miR-29a, novel\_1, miR-29c-3p, miR-495-3p, miR-452-5p, miR-136-3p, novel\_111, miR-323c, miR-378b, miR-708-3p, miR-296-5p, miR-299a-5p, miR-29b, miR-378c, miR-26b-3p, miR-330-3p, miR-9788-3p, miR-185-5p, novel\_51, miR-182-5p, miR-330-3p, miR-320b, miR-466f-3p, miR-22851, miR-491-5p, miR-1185-5p, miR-196b-5p, miR-6240, let-7j, miR-193a, miR-378d, miR-320a, miR-433-3p, miR-3154, miR-129b-3p, miR-299, miR-186-5p, miR-7144-5p, miR-141-3p, miR-182-5p, miR-3065-3p, miR-874-3p, miR-504-5p, miR-378a-3p, miR-6130, miR-216b-5p, miR-331-3p, let-7b-3p, miR-29b-3p, miR-487a-5p, miR-3607-3p, miR-4510, miR-378c, miR-378c, miR-98-3p, miR-6525, miR-378a-3p, miR-188-3p, miR-5703, miR-140-3p, miR-29d-3p, miR-98-3p, miR-3578, miR-196a-5p, miR-378i, miR-378d, miR-200b-3p, miR-4429, miR-493-3p, miR-429-3p, miR-548e-3p, miR-18a-3p, miR-214-5p, miR-532-3p, miR-2284z, miR-2284h-5p, miR-616-3p, miR-200b, miR-378h, miR-7859, miR-422a, miR-92a-1-5p, miR-219b-5p, miR-664-3p, miR-200c, miR-200a-3p, novel\_96, novel\_127, miR-200c-3p, miR-202-5p, miR-320d, miR-345-3p, miR-195a-3p, miR-3529-3p, miR-2285w, miR-1271-3p, miR-3065-3p, miR-200a, miR-2432, miR-194b-5p, miR-9-5p, miR-452-5p, miR-2285t, miR-212-3p, miR-3059-5p, miR-877-3p, miR-371a-5p, miR-101-3p, miR-2440, miR-30b-5p, miR-490-5p, miR-3958-3p, miR-7977, miR-2285u, miR-499b-5p, miR-27a-3p, miR-1185-2-3p, let-7d-5p, miR-203-3p, miR-335-3p, miR-136-5p, miR-299b-5p, miR-96-5p, miR-33a-5p, miR-382-3p, miR-124a, let-7a-5p, miR-758-3p, miR-2310, miR-182-5p, miR-505, miR-320b, let-7e, miR-153-3p, miR-27a-3p, miR-5010-3p, miR-548w, miR-2459, miR-1185-3p, miR-216a-3p, miR-153, miR-125b-2-3p, miR-758-3p, miR-4791, miR-544a, miR-129-2-3p, miR-539-5p, let-7b, miR-338-3p, let-7b-5p, miR-224-5p, miR-338-5p, miR-30a-3p, miR-30e-3p, miR-2285j, let-7f, miR-130b-5p, miR-208b-5p, miR-129-5p, miR-17-3p, miR-182-5p, let-7i-5p, miR-544-3p, miR-376e-3p, miR-27a-5p, miR-433-3p, miR-30d-5p, miR-21a-3p, novel\_99, miR-339b, miR-30f, miR-2312, miR-487a, miR-376c-3p, miR-125b-2-3p, miR-125b, miR-500a-5p, miR-324-3p, miR-210-5p, miR-30b, let-7k, miR-1277-5p, miR-30d, miR-98-5p, miR-320d, miR-30d-3p, miR-222-5p, miR-200b, miR-1434-5p, miR-140-3p, miR-217-5p, miR-124-3p, miR-1961, miR-30c-5p, miR-664-5p, miR-17-3p, miR-29c-3p, novel\_27, let-7i, miR-4324, miR-421-5p, miR-29a, miR-379-3p, miR-320c, miR-29a-3p, miR-378b, miR-2285ab, let-7e-5p, miR-410-5p, let-7f-2-3p, let-7f-2-3p, miR-130b-5p, miR-380-5p, miR-22841, miR-654-3p, miR-194a, novel\_51, miR-224-5p, miR-466f-3p, miR-125a-5p, miR-452-5p, miR-339-5p, miR-340-3p, miR-544b, let-7g-5p, miR-3431, miR-3535, miR-194-5p, miR-27b-3p, miR-7862, miR-29b, miR-193a-5p, miR-3607-3p, miR-28a-3p, miR-1197-3p, miR-409-3p, miR-125b-5p, miR-29b-3p, miR-125a, miR-141-3p, miR-487a-3p, miR-376c-3p, miR-320a, miR-137-3p, miR-2448-3p, miR-424-3p, miR-30e-5p, miR-485-5p, miR-1814c, novel\_91, miR-30a-3p, miR-2385-3p, miR-192-3p, let-7g, miR-200a, miR-339a, miR-217, let-7c-5p, miR-30f, miR-200c, miR-2285af, miR-205-5p, miR-



miR-499b-3p, miR-2285aa, miR-30c-1-3p, novel\_99, miR-190a-3p, miR-329a, miR-3154, miR-23b, let-7f-1-3p, miR-21a-3p, miR-181c-5p, miR-98-3p, miR-3074-2-3p, miR-665-5p, miR-130b-5p, miR-191-5p, miR-135a-5p, miR-3969, let-7b-3p, miR-1-5p, miR-200b, miR-23c, miR-302a-5p, miR-23b-3p, miR-383-5p, miR-7859, miR-429-3p, let-7a-3p, miR-200b-3p, miR-128-3p, miR-33b-3p, miR-98-3p, miR-218-2-3p, miR-362-3p, miR-3591-5p, miR-191, miR-146a-5p, miR-200a, miR-130a-5p, miR-376a-5p, miR-181a-2-3p, miR-195a-3p, miR-21-3p, miR-1a-2-5p, miR-200c-3p, miR-181b-5p, miR-30c-2-3p, miR-216a-5p, miR-200c, miR-664-3p, miR-1185-2-3p, miR-499a-3p, miR-499b-5p, miR-216b-3p, miR-378b, miR-664b, miR-135b-5p, miR-146b-5p, miR-3065-5p, miR-216a-3p, miR-323c, miR-452-5p, miR-181d-5p, miR-885-5p, miR-1a-1-5p, miR-219b-3p, miR-199c, miR-22-5p, novel\_1, miR-371a-5p, miR-576-3p, miR-1185-3p, miR-411-5p, miR-9788-3p, miR-330-3p, miR-199b-3p, miR-362-3p, miR-125b-2-3p, miR-3071-5p, miR-197-3p, miR-181a-5p, miR-542-3p, miR-329-3p, miR-653, miR-503-3p, miR-8485, let-7j, miR-30c-1-3p, let-7f-2-3p, let-7f-2-3p, miR-23a-3p, miR-494-3p, miR-6240, miR-130b-5p, miR-146b, miR-362-3p, miR-330-3p, miR-146a miR-148a-5p, miR-2284ab, miR-1197-5p, miR-140-3p, miR-1a-3p, miR-873a-5p, miR-2285e, miR-455-3p, miR-148b-5p, miR-3431, miR-142-5p, miR-2285g, miR-2284d, miR-146b, miR-216a-5p, miR-3601, miR-146a, miR-2285af, miR-2284a, miR-146a-5p, miR-2284b, miR-1, miR-135b-5p, novel\_99, miR-146b-5p, novel\_48, miR-2312, miR-1306-3p, miR-200a-5p, miR-424-3p, miR-2285c, miR-2285ab, miR-204-3p, miR-3596, miR-27a-5p, miR-7-1-3p, miR-216b-3p, miR-2284q, miR-206, miR-135a-5p, miR-33a-3p, miR-1306-3p, miR-206-3p, miR-142a-5p, miR-3074-2-3p, miR-2285f, miR-2284v, miR-145a-3p, miR-2447 miR-3154, miR-625-5p, miR-1248, miR-671-5p, miR-485-5p, miR-2355-5p, miR-216b-3p, miR-2285aa, miR-532-5p, miR-615-5p, miR-574-5p, miR-548o-3p, miR-874-3p, miR-204-3p, novel\_32, miR-223-5p, miR-22-3p, miR-34c-5p, miR-324-3p, miR-3969, miR-665, miR-874-5p, miR-3607-3p, novel\_42, miR-3184-5p, miR-6134, miR-338-3p, miR-6525, miR-1197-3p, miR-1343-5p, miR-330-5p, miR-2366, miR-193b-5p, miR-128-3p, miR-34a-5p, miR-148a-5p, miR-2284u, miR-582-3p, miR-299a-3p, miR-548e-3p, novel\_83, miR-7859, miR-324-3p, miR-34b-5p, miR-299-3p, miR-2898, miR-450a-2-3p, miR-760-3p, miR-127-5p, miR-345-3p, miR-4286, miR-2284y, miR-146a-5p, miR-664b-3p, miR-28b, miR-216a-3p, miR-361-3p, miR-146b-5p, miR-2284g, miR-203-3p, miR-677, miR-181b-3p, miR-378g, miR-299b-3p, novel\_69, miR-489, miR-34b, miR-34c, miR-218-5p, miR-28c, miR-2440, miR-128-1-5p, miR-135a-2-3p, novel\_60, miR-2447, miR-3956-3p, miR-449a, miR-326-3p, miR-423-5p, miR-22-3p, miR-3071-5p, miR-30b-3p, miR-484, miR-2113, miR-30b-3p, miR-181b-2-3p, novel\_4, miR-1343-3p, miR-2300a-5p, miR-148b-5p, miR-9788-3p, miR-421, miR-134-3p, miR-185-5p, miR-146a, miR-326, miR-1343-5p, miR-146b, miR-378a-5p, miR-363-5p, miR-2284b, miR-2330-5p, miR-503-3p

TSPAN13 ENSOARGO(tetraspa)

ZDHC13 ENSOARGO(zinc fin)

LPO ENSOARGO(lactoper)

novel\_133, miR-1343-5p, miR-188-3p, miR-1197-5p, miR-5703, miR-941, miR-133a-3p, let-7a-2-3p, miR-378d, miR-299a-3p, miR-106a, novel\_79, miR-302a-5p, miR-1271-5p, miR-6516-5p, miR-2284h-5p, miR-582-3p, miR-486-5p, miR-2285af, miR-6119-5p, novel\_17, miR-2285p, miR-92a-1-5p, miR-339a, miR-106a, miR-760-3p, miR-299-3p, novel\_96, miR-183-5p, miR-2285w, miR-20a, miR-1, miR-200a, miR-146a-5p, miR-450c-5p, miR-301, miR-93-5p, miR-17-5p, miR-339b, let-7g-3p, miR-345-5p, miR-345-5p, miR-20b-5p, miR-625-5p, miR-574-5p, miR-874-3p, miR-548o-3p, miR-370-3p, miR-2355-5p, miR-296-3p, miR-6516, miR-300-3p, miR-6130, miR-154b-5p, miR-144, miR-409-3p, miR-708-5p, miR-28-5p, let-7e-3p, miR-145a-3p, miR-4510, miR-3184-3p, miR-6128, miR-1271, miR-665-5p, miR-93, miR-1197-3p, miR-206-3p, miR-122-5p, miR-2284r, miR-1a-3p, miR-145a-5p, miR-187-3p, miR-2300a-5p, miR-339-5p, miR-26b-3p, miR-145b, miR-3431, novel\_116, miR-20b, miR-1306-5p, miR-146a, miR-106a-5p, novel\_51, miR-106b-5p, miR-17-5p, miR-491-5p, miR-146b, miR-1343-5p, miR-101b-3p, miR-106a-5p, let-7c-3p, miR-744-3p, miR-345-5p, let-7a-2-3p, miR-361-3p, miR-1306, miR-96-5p, miR-9851-3p, miR-146b-5p, miR-2319b, miR-299b-3p, miR-670-3p, miR-144-3p, miR-4443, novel\_82, miR-20a-5p, miR-371a-5p, miR-499a-5p, miR-206, novel\_1, miR-450a-5p, miR-2284q, miR-877-3p, miR-3959-3p, miR-371b-3p, miR-8485, miR-3187-3p, miR-345-5p, miR-2330-5p, miR-101b-3p, miR-3085-3p, miR-197-5p, miR-505, novel\_51, miR-326, miR-500-5p, miR-9788-3p, miR-455-3p, miR-1185-3p, miR-134-3p, miR-3431, miR-133b-5p, miR-2300a-5p, miR-1343-3p, miR-2284x, miR-7862, miR-138, miR-873a-5p, miR-301b-5p, miR-326-3p, miR-877-3p, miR-361-3p, miR-362-5p, novel\_111, miR-495-3p, miR-1193, miR-135a-2-3p, miR-3059-5p, miR-2447, miR-335-5p, miR-206, miR-335, miR-301a-5p, miR-2285n, miR-101-3p, miR-576-3p, miR-669, miR-1185-2-3p, miR-378g, miR-670-3p, miR-2285u, miR-499b-5p, miR-3064-5p, miR-3074-5p, miR-9851-3p, miR-1291, miR-18a-3p, miR-18b, miR-148a-3p, miR-2411, novel\_39, miR-1271-3p, miR-3064-5p, miR-2887, miR-543-5p, miR-152-3p, novel\_127, miR-450a-2-3p, miR-2285af, miR-210-5p, miR-148b-3p, miR-2411-5p, miR-18b-5p, miR-18a-3p, miR-218-1-3p, miR-378d, miR-330-5p, miR-23b-5p, miR-6134, miR-206-3p, miR-4510, miR-3074-5p, miR-874-5p, miR-138-5p, miR-767-5p, miR-324-3p, miR-2433, miR-370-5p, miR-204-3p, miR-6130, miR-216b-5p, miR-370-3p, miR-370-5p, miR-1271, miR-23a-5p, miR-1827, miR-767, miR-18a-5p, miR-345-5p, miR-345-5p, miR-362-5p, miR-18a, miR-3154

miR-345-3p, miR-127-5p, miR-760-3p, miR-200a-3p, novel\_96, miR-221-5p, miR-183-5p, miR-3064-5p, miR-377-5p, miR-143-3p, miR-345-3p, miR-330-5p, miR-1343-5p, miR-155-5p, miR-212-5p, miR-1224-5p, miR-483-3p, novel\_83, miR-320e, miR-664a-5p, miR-135a-5p, miR-155-5p, miR-665-5p, miR-133a-3p, miR-3958-5p, miR-346, miR-365a-5p, miR-133b-3p, miR-2474, miR-485-5p, miR-3068-3p, miR-2331-3p, miR-221-5p, miR-182-5p, miR-1271, miR-141-3p, miR-370-3p, miR-2284s, miR-155-5p, miR-326, miR-2411-3p, miR-182-5p, miR-365b-5p, miR-3085-3p, miR-491-5p, miR-483-3p, miR-378a-5p, miR-1343-5p, miR-2330-5p, miR-1388-3p, miR-744-3p, miR-432-3p, miR-432-3p, miR-2284r, miR-2426, miR-3120-5p, novel\_4, miR-377-5p, miR-134-3p, miR-147-5p, miR-219b-3p, miR-1296-5p, miR-326-3p, miR-3970, miR-1291, miR-410-5p, miR-3963, miR-135b-5p, miR-3064-5p, miR-320b, miR-378g, miR-2404, miR-6535, miR-135a-1-3p, miR-2440, miR-5100, miR-382-5p, miR-135a-5p, miR-6740-5p, miR-324-3p, miR-3964, miR-22-5p, miR-2285t, miR-3074-2-3p, miR-133a-3p, miR-8095, miR-326-3p, miR-150-5p, miR-133b-3p, miR-135b-5p, miR-7975, miR-1271, miR-182-5p, miR-541-5p, miR-370-3p, miR-3082-5p, miR-411b-3p, miR-670-3p, miR-181b-3p, miR-677, novel\_32, miR-223-5p, miR-326, miR-210-5p, miR-7-5p, miR-182-5p, miR-450a-2-3p, miR-2285w, miR-345-3p, miR-668-3p, miR-181b-1-3p, miR-654-3p, miR-490-3p, miR-7b-5p, novel\_133, miR-330-5p, miR-2427, miR-148a-5p, miR-188-5p, miR-2300a-5p, miR-133b-5p, miR-6517, miR-421, miR-148b-5p, novel\_116, miR-2284h-5p, miR-545-5p, miR-6516-3p, miR-208b-5p, miR-551b-3p, miR-29d-5p, miR-3604, miR-877-3p, miR-6525, miR-29c-5p, miR-122-5p, miR-2285x, miR-361-3p, miR-200a-5p, miR-411, miR-320a, miR-2284s, miR-323a-5p, miR-323-5p, miR-320c, miR-574-5p, miR-452-3p, miR-660-5p, miR-20a-3p, miR-532-5p, miR-124-5p, miR-320d, miR-450a-2-3p, miR-200c-3p, miR-660, miR-320b, miR-200c, novel\_103, miR-92a-1-5p, miR-654-3p, miR-1957a, miR-2424, miR-143-3p, miR-1388-3p, miR-2483-5p, miR-181a-2-3p, miR-33a-5p, miR-4429, miR-3432b, miR-2284aa, miR-200b-3p, miR-200b, miR-222-5p, miR-2284z, miR-31-5p, miR-429-3p, miR-5010-3p, miR-92a-1-5p, miR-2397-5p, miR-664-3p, miR-34b-5p, miR-450a-2-3p, miR-495-5p, miR-101-5p, miR-345-3p, miR-382-3p, miR-376c-5p, miR-486-3p, miR-376b-5p, miR-2284l, miR-377-5p, miR-1246, miR-218-1-3p, miR-34a-5p, miR-377-5p, novel\_4, miR-1247-5p, miR-9-5p, miR-34c, miR-490-5p, miR-129-5p, miR-486b-3p, miR-2285x, miR-9-5p, miR-136-3p, miR-449a, miR-3956, miR-874-3p, miR-133c, miR-34c-5p, miR-216b-5p, miR-34b

|       |                    |                                                                                                                                                                                                                                                                                                                                                                                                                                                                                                                                                                                                                                                                                                                                                                                                                                                                                                                                                                                                                                                                                                                                                                             |
|-------|--------------------|-----------------------------------------------------------------------------------------------------------------------------------------------------------------------------------------------------------------------------------------------------------------------------------------------------------------------------------------------------------------------------------------------------------------------------------------------------------------------------------------------------------------------------------------------------------------------------------------------------------------------------------------------------------------------------------------------------------------------------------------------------------------------------------------------------------------------------------------------------------------------------------------------------------------------------------------------------------------------------------------------------------------------------------------------------------------------------------------------------------------------------------------------------------------------------|
|       |                    | miR-544-3p, miR-370-3p, miR-2285aa, miR-874-3p, miR-186-5p, miR-1895, miR-30f, miR-339b, miR-767, miR-3154, miR-3607-3p, miR-28-5p, miR-874-5p, miR-208b-5p, miR-708-5p, miR-767-5p, miR-135a-5p, miR-100-3p, miR-2332, miR-29b-3p, miR-7859, novel_79, miR-548e-3p, miR-29d-3p, miR-30c-5p, miR-181b-1-3p, miR-376a-5p, miR-2887, miR-183-5p, miR-                                                                                                                                                                                                                                                                                                                                                                                                                                                                                                                                                                                                                                                                                                                                                                                                                         |
| TMX4  | ENSOARGOC thioredo | 339a, novel_17, miR-30b, miR-181b-3p, miR-27a-3p, miR-677, miR-29a-3p, miR-541-5p, miR-10b, miR-877-3p, miR-135b-5p, miR-8095, miR-194b-5p, miR-29c-3p, miR-219a-5p, miR-147-5p, miR-29a, miR-3968, miR-371a-5p, miR-30b-5p, miR-544b, miR-181b-2-3p, miR-27a-3p, miR-339-5p, miR-133b-5p, novel_78, miR-31-5p, miR-7862, miR-27b-3p, miR-3120-5p, miR-544a, miR-29b, miR-194-5p, miR-654-3p, miR-378a-5p, miR-194a                                                                                                                                                                                                                                                                                                                                                                                                                                                                                                                                                                                                                                                                                                                                                         |
| LY9   | ENSOARGOC lymphocy | novel_27, miR-122-5p, miR-10b-3p, miR-342-3p, miR-3059-5p, miR-130b-5p, miR-2285t, miR-142b, novel_87, miR-107-5p, miR-3082-5p, miR-670-3p, miR-27a-3p, miR-2331-3p, miR-552-3p, miR-136-5p, miR-186-5p, miR-23b, miR-130a-5p, miR-432-3p, miR-503-3p, miR-382-3p, miR-6240, miR-130b-5p, miR-23a-3p, miR-103a-2-5p, miR-1277-5p, miR-452-5p, miR-618, novel_17, miR-342, miR-330-3p, miR-23c, miR-1298-3p, miR-23b-3p, miR-330-3p, miR-145b, miR-27a-3p, miR-1b-3p, miR-142-3p, miR-27b-3p, miR-2300b-3p, novel_133, miR-145a-5p, miR-2427, miR-218-2-3p                                                                                                                                                                                                                                                                                                                                                                                                                                                                                                                                                                                                                   |
| IGHE  | ENSOARGOC immunogl | miR-542-3p, miR-2113, miR-4791, miR-378b, miR-30b-3p, miR-378c, miR-30b-3p, miR-16b, miR-3120-5p, miR-497-5p, miR-2300a-5p, miR-339-5p, miR-147a, miR-3535, miR-149-5p, miR-216a-3p, miR-16b, miR-197-5p, miR-3141, miR-214-3p, miR-193a-3p, miR-424-5p, miR-363-5p, miR-378d, miR-3141, miR-376b-5p, miR-504, miR-147-3p, miR-96-5p, miR-195a-5p, miR-378f, miR-9851-3p, miR-378b, novel_68, miR-211-5p, miR-3082-5p, miR-146b-3p, miR-378e, miR-4443, miR-615, miR-15a, miR-16a, miR-193b-3p, miR-211, miR-361-3p, miR-423-5p, novel_133, miR-378i, miR-615-3p, miR-378a-3p, miR-2904, miR-378d, miR-133a-3p, miR-212-5p, miR-1224-5p, miR-15a-5p, miR-2411-5p, miR-1271-5p, miR-378h, miR-322-5p, miR-185-3p, miR-422a, miR-339a, miR-324-3p, miR-760-3p, miR-466i-5p, miR-2898, miR-543-5p, miR-376b-5p, miR-2411, novel_39, miR-376c-5p, miR-486-3p, miR-376c-5p, miR-339b, miR-485-5p, miR-376c-5p, miR-504-5p, miR-378a-3p, miR-574-5p, miR-193b-3p, miR-3965, miR-6130, miR-27a-5p, miR-15b-5p, miR-29d-5p, miR-204-5p, miR-486b-3p, miR-424-5p, miR-4492, miR-4510, miR-378c, miR-665-5p, miR-214, miR-1271, miR-16-5p, miR-346, miR-29c-5p, miR-378c, miR-3184-5p |
| INADL | ENSOARGOC InaD-lik | miR-1843b-5p, miR-34a-5p, miR-142-3p, miR-211-5p, miR-139-5p, miR-30c-1-3p, miR-2459, miR-194-3p, miR-34b, miR-670-3p, miR-139-5p, miR-34c-5p, miR-3604, miR-34c, miR-500a-5p, miR-365b-5p, miR-30c-2-3p, miR-204-5p, miR-34b-5p, miR-2898, miR-499a-5p, miR-183-5p, miR-2285b, miR-449a, miR-365a-5p, miR-323c, miR-30c-1-3p, miR-450b-5p, miR-211                                                                                                                                                                                                                                                                                                                                                                                                                                                                                                                                                                                                                                                                                                                                                                                                                         |

miR-3957-3p, miR-17-3p, miR-1193, miR-342-3p, miR-326-3p, miR-449a, miR-2428, miR-211, miR-24-3p, miR-34c, miR-6402, miR-22-5p, miR-147-5p, miR-128-1-5p, novel\_1, miR-655-5p, miR-7-1-3p, miR-323a-5p, miR-2404, miR-34b, miR-18a-3p, miR-450b-3p, miR-654-3p, miR-190a, miR-197-5p, miR-99a-5p, miR-503-5p, miR-125a-5p, miR-452-5p, miR-1343-5p, miR-22851, miR-26b-3p, miR-432-5p, miR-2285g, miR-185-5p, miR-503-5p, miR-145a-5p, miR-1285, miR-181a-5p, miR-7862, miR-138, miR-219a-1-3p, miR-1260b, miR-6128, miR-331-3p, miR-3969, miR-409-3p, miR-34c-3p, miR-410-5p, miR-370-5p, miR-204-5p, miR-138-5p, miR-370-3p, miR-487a-3p, miR-199a-5p, miR-34c-5p, miR-374c-3p, miR-3965, miR-320a, miR-3154, miR-100-5p, miR-7144-5p, miR-23a-5p, miR-485-5p, miR-10a-3p, miR-4286, miR-181a-2-3p, miR-199a-5p, miR-490-3p, miR-1271-3p, miR-30c-2-3p, miR-1260a, miR-2285af, miR-6119-5p, miR-99a, miR-17-3p, miR-181b-5p, miR-214-5p, miR-2411-5p, miR-345-3p, miR-134, miR-99a-5p, miR-181d-5p, miR-219a-5p, miR-3059-5p, miR-541-3p, miR-154a, miR-1973, miR-371a-5p, miR-107-5p, miR-4726-5p, miR-499b-5p, miR-3082-5p, miR-361-3p, miR-199b-5p, miR-877-3p, novel\_94, miR-30c-1-3p, miR-2957, miR-320b, miR-342, novel\_103, miR-326, miR-2285o, miR-9788-3p, miR-2285e, miR-7857, miR-296-5p, miR-484, miR-6529a, miR-143-5p, miR-145a-3p, miR-4510, miR-324-3p, miR-369-5p, miR-19b-1-5p, miR-132-5p, miR-208b-5p, miR-664a, miR-17-3p, miR-370-5p, novel\_32, miR-22-3p, miR-193b-3p, miR-323-5p, miR-6130, miR-21a-3p, novel\_99, miR-183-5p, miR-146a-5p, miR-2411, miR-2432, miR-125b, miR-1277-5p, miR-34b-5p, miR-320d, miR-466i-5p, miR-760-3p, miR-3600, miR-3960, miR-199a-3p, novel\_83, miR-532-3p, miR-487a-3p, miR-148b-3p, miR-340-5p, miR-1197-5p, miR-2408, miR-378d, miR-4429, miR-193b-3p, miR-100h-5p, miR-1324, miR-6123, miR-3120-3p, miR-216h-3p, miR-378h, miR-15a-5p, miR-322-5p, miR-6517, miR-18a-3p, miR-196a-2-3p, let-7a-2-3p, miR-664-5p, miR-2300b-3p, miR-378i, miR-378a-3p, miR-2904, miR-105-3p, miR-183-5p, miR-17-3p, novel\_127, novel\_96, miR-21-3p, miR-30b-3p, miR-125a-3p, miR-1260a, miR-422a, miR-185-3p, miR-324-3p, miR-6130, miR-377-3p, miR-15b-5p, miR-324-5p, miR-874-3p, miR-504-5p, miR-378a-3p, miR-1271, miR-2355-5p, let-7g-3p, miR-21a-3p, miR-1260b, miR-338-3p, miR-378c, miR-4510, miR-378c, novel\_42, miR-214, miR-16-5p, miR-664a, miR-17-3p, miR-28-5p, miR-204-5p, miR-4492, miR-874-5p, miR-708-5p, miR-424-5p, miR-5100, miR-410-5p, miR-665, miR-331-3p, miR-185-5p, miR-455-3p, miR-1260b, miR-378c, miR-16b, miR-744-5p, miR-497-5p, miR-143-5p, miR-223-3p, miR-2284r, miR-378b, miR-296-5p, miR-374b-3p, miR-3071-5p, miR-378d, miR-1b-5p, let-7a-2-3p, miR-424-5p, miR-1388-3p, miR-491-5p, miR-2285o, miR-214-3p, miR-5126, miR-377-3p, miR-16b, miR-374c-3p, miR-378e, miR-454-5p, miR-6535, miR-7977, miR-211-5p, miR-504, miR-378f, miR-877-3p, miR-195a-5p, miR-2387, miR-361-3p, miR-18a-3p, miR-24-3p, miR-211, miR-2428, novel\_27, miR-3059-5p, miR-17-3p, miR-15a, miR-16a

DDOST

ENSOARGO(dolichyl

SSRP1

ENSOARGO(structur

miR-665, miR-145b, miR-142-5p, miR-455-3p, miR-1185-3p, miR-2284r, miR-301b-5p, miR-145a-5p, novel\_23, miR-450b-5p, miR-2284aa, miR-455-5p, miR-2483-5p, let-7f-2-3p, miR-2284b, let-7f-2-3p, miR-30c-1-3p, miR-345-5p, miR-1b-5p, miR-455-5p, miR-182-5p, miR-199b-5p, miR-2284g, miR-655-5p, miR-7977, miR-323a-5p, miR-670-3p, miR-2483-3p, miR-203-3p, miR-1185-2-3p, miR-454-5p, miR-199b-5p, miR-7975, miR-2319a, novel\_94, miR-3059-5p, novel\_60, miR-3956-3p, miR-877-3p, novel\_27, miR-154a, miR-2284w, miR-199b-5p, miR-142b, miR-301a-5p, novel\_1, miR-374a-3p, miR-7641, miR-3600, miR-2284z, miR-188-3p, miR-23b-5p, miR-582-3p, miR-142-3p, miR-155-5p, miR-378d, miR-2284u, miR-130a-5p, miR-2284y, miR-199a-5p, miR-143-3p, miR-2284a, miR-205-5p, miR-30c-2-3p, miR-219b-5p, miR-30c-1-3p, miR-182-5p, miR-582-5p, miR-300-3p, miR-216b-5p, miR-323-5p, miR-199a-5p, miR-155-5p, miR-137-3p, miR-433-3p, miR-345-5p, miR-345-5p, miR-1827, miR-142a-5p, miR-374a-3p, miR-3604, miR-129-5p, miR-374b-3p, miR-669, miR-329-5p, miR-410-5p, let-7e-5p, miR-3141, miR-216a-3p, miR-1306, miR-3970, miR-2285m, miR-29c-3p, miR-29a, miR-6123, miR-576-3p, miR-134-3p, miR-3431, miR-149-5p, novel\_116, miR-31-5p, miR-16b, miR-27b-3p, miR-497-5p, miR-7b-5p, miR-542-3p, miR-450c-3p, miR-432-3p, miR-432-3p, miR-493-5p, miR-196b-5p, miR-7-5p, miR-3141, miR-2285v, miR-331-5p, miR-223-5p, miR-874-3p, miR-125a, miR-329b, miR-329a, miR-30e-5p, miR-1260b, novel\_42, miR-193a-5p, miR-16-5p, miR-592, miR-125b-5p, miR-758-5p, miR-322-5p, miR-450a-1-3p, miR-6517, miR-885-3p, miR-196a-5p, miR-330-5p, miR-2427, miR-2285b, let-7g, let-7f-5p, novel\_96, novel\_127, miR-378g, miR-4443, miR-211-5p, miR-504, miR-493-5p, novel\_111, miR-877-3p, miR-423-5p, miR-2447, miR-301a-5p, miR-147a, miR-1298-3p, miR-496-5p, miR-1343-3p, miR-362-3p, miR-21b, miR-301b-5p, miR-541, miR-329-3p, miR-1388-3p, miR-491-5p, miR-214-3p, miR-103a-2-5p, miR-16b, let-7i-5p, miR-15b-5p, miR-30c-1-3p, miR-2331-3p, miR-504-5p, miR-552-3p, miR-1827, miR-885-3p, miR-450a-1-3p, miR-129b-3p, miR-346, miR-6525, miR-3184-5p, let-7b, miR-214, miR-3958-5p, novel\_74, miR-4492, miR-874-5p, let-7f, miR-3604, miR-328-3p, miR-18a-3p, miR-212-5p, miR-33b-3p, miR-142-3p, miR-34a-5p, miR-133a-3p, miR-1961, miR-193b-5p, miR-30c-5p, miR-377-5p, miR-664b-3p, miR-143-3p, miR-486-3p, miR-329a-5p, miR-98-5p, let-7k, miR-30b, miR-92a-1-5p, miR-324-3p, miR-219b-5p, miR-29a-3p, miR-670-3p, miR-34b, miR-323a-5p, miR-2404, miR-320b, miR-450b-3p, miR-1291, miR-195a-5p, miR-6395, miR-9851-3p, miR-18a-3p, miR-3959-3p, miR-24-3p, miR-211, miR-326-3p, miR-449a, miR-1193, miR-128-1-5p, miR-6402, miR-15a, miR-3613, let-7i, miR-34c, miR-16a, miR-185-5p, let-7g-5p, miR-6238, miR-133b-5p, miR-26b-3p, miR-377-5p, miR-1260b, miR-29b, miR-30b-3p, miR-2880, miR-7862, miR-1285, miR-2182-5p, miR-282, miR-

TNFAIP6 ENSOARGOC tumor ne

SAMD10 ENSOARGOC sterile

miR-848b, miR-2310, miR-744-3p, miR-146b, miR-199b-5p, miR-214-3p, miR-103a-2-5p, miR-491-5p, miR-1185-5p, miR-505, miR-182-5p, miR-2459, miR-126a-5p, miR-147a, miR-181b-2-3p, miR-1343-3p, miR-330-3p, miR-101c, miR-1388-5p, miR-2284r, miR-301b-5p, miR-541, miR-361-3p, miR-2447, miR-3956-3p, miR-3968, miR-499a-5p, miR-301a-5p, miR-2440, miR-144-5p, miR-25, miR-2285u, miR-211-5p, miR-139-5p, miR-335-3p, miR-1983, miR-504, miR-136-5p, miR-221, miR-486-3p, miR-664b-3p, miR-181b-1-3p, miR-345-3p, miR-329a-5p, miR-2285w, miR-3653-3p, miR-202-5p, miR-345-3p, miR-92a-1-5p, miR-122-3p, miR-26a-5p, miR-618, miR-210-5p, miR-2284h-5p, miR-328-3p, miR-7859, miR-380-5p, miR-664-5p, miR-16-1-3p, miR-218-1-3p, miR-361-5p, miR-184-3p, miR-217-5p, miR-2366, miR-193b-5p, miR-6525, miR-769-5p, miR-214, miR-3184-3p, miR-500, miR-129-5p, miR-4492, novel\_74, miR-665, miR-2284s, miR-10a, miR-216b-5p, miR-216b-3p, miR-552-3p, miR-30c-1-3p, miR-504-5p, miR-548o-3p, miR-543-3p, miR-625-5p, miR-1895, miR-1827, miR-345-5p, miR-339b, miR-500a-3p, miR-433-3p, miR-299, miR-2285c, miR-432-3p, miR-432-3p, miR-380-5p, miR-6240, miR-483-3p, miR-105-5p, miR-2411-3p, miR-194a, miR-7-5p, miR-146a, miR-149-5p, miR-3431, miR-339-5p, miR-31-5p, miR-27b-3p, miR-188-5p, miR-16-1-3p, miR-2113, miR-7b-5p, miR-199b-5p, miR-758-5p, miR-29c-3p, miR-625-3p, miR-421-5p, miR-29a, miR-4324, miR-28c, miR-6535, miR-677, miR-669, miR-181b-3p, miR-374c-3p, miR-26b-5p, novel\_68, miR-329-5p, miR-146b-5p, miR-412-3p, miR-3970, miR-3591-3p, miR-148a-3p, miR-29a-5p, miR-192-3p, miR-148b-5p, novel\_96, miR-200a-3p, miR-152-3p, miR-127-5p, miR-205-5p, miR-664-3p, novel\_79, miR-2285ad, miR-429-3p, miR-1343-5p, miR-144-5p, miR-191-5p, miR-100-3p, miR-6740-5p, miR-125b-5p, miR-2433, miR-223-5p, miR-1343-5p, miR-300-3p, miR-2355-5p, miR-1271, miR-125a, miR-1343-5p, miR-130b-3p, miR-3085-3p, miR-196b-5p, novel\_51, miR-544b, miR-500-5p, miR-3431, miR-130a-3p, miR-339-5p, miR-31-5p, miR-16-2-3p, miR-544a, miR-1260b, miR-138, miR-1434-3p, miR-653, miR-2284w, miR-301b-3p, miR-449a, miR-211, miR-362-5p, miR-17-3p, miR-502b, miR-2285t, miR-34c, miR-502-5p, miR-669, miR-34b, miR-211-5p, miR-4792, novel\_68, miR-3064-5p, miR-18a-3p, miR-148a-3p, miR-361-3p, miR-1271-3p, miR-2285b, miR-192-3p, miR-345-3p, miR-181a-2-3p, miR-3064-5p, miR-3529-3p, novel\_127, miR-152-3p, miR-34b-5p, miR-221-5p, miR-760-3p, miR-17-3p, miR-450a-2-3p, miR-339a, miR-1260a, miR-532-3p, miR-148b-3p, miR-3600, novel\_79, miR-18a-3p, miR-34a-5p, miR-1343-5p, miR-2408, miR-196a-5p, miR-10b-3p, miR-1260b, miR-6525, miR-500b-5p, miR-204-5p, miR-454-3p, miR-500, miR-17-3p, miR-138-5p, miR-3969, miR-331-3p, novel\_25, miR-544-3p, miR-301a-3p, miR-34c-5p, miR-221-5p, miR-2331-3p, miR-339b, miR-362-5p, miR-500a-3p

miR-300-3p, miR-2483-3p, miR-2284n, miR-545-3p, miR-140-5p, miR-221-5p, miR-2284g, miR-3074-5p, miR-7-1-3p, miR-876-3p, miR-488-3p, miR-301, miR-2448-3p, miR-18a-3p, miR-326-3p, miR-1306-5p, miR-3074-5p, miR-145a-3p, miR-2284v, miR-2284j, miR-22-5p, miR-203b-5p, miR-147-5p, miR-2284k, miR-2285j, miR-2284d, miR-758-5p, miR-148b-5p, miR-455-3p, miR-18a-3p, miR-148a-5p, miR-2284u, miR-1197-5p, miR-330-5p, miR-380-5p, miR-130a-5p, miR-2284y, miR-8485, miR-380-5p, miR-2284b, miR-221-5p, novel\_127, miR-326, miR-30f

miR-148a-3p, miR-3154, miR-377-3p, miR-27a-3p, miR-20a-3p, miR-26b-5p, miR-101-3p, miR-301a-5p, miR-135a-2-3p, novel\_60, miR-3956-3p, miR-2285x, novel\_73, miR-21b, miR-27b-3p, miR-301b-5p, miR-124-3p, miR-148b-3p, miR-421, miR-27a-3p, miR-127-5p, miR-452-5p, miR-3653-3p, miR-152-3p, miR-2285af, miR-377-3p, novel\_103, miR-26a-5p, miR-3071-3p, miR-2432, miR-124a, let-7c-3p, miR-33a-5p

miR-27b-5p, miR-433-3p, miR-221, miR-2285u, miR-32-5p, miR-499b-3p, miR-499a-3p, miR-25-3p, miR-411b-3p, miR-2285y, miR-33a-3p, miR-34c-3p, miR-222-3p, miR-2285n, miR-92a-3p, miR-495-3p, miR-363-3p, miR-323-3p, miR-432, miR-6529a, miR-101a-5p, miR-222, miR-2285ad, miR-330-3p, novel\_4, miR-221-3p, miR-432-5p, miR-32, miR-330-3p, miR-2285af, miR-466f-3p, miR-92a-3p, miR-202-5p, miR-668-3p, miR-6240, miR-92b-3p, miR-450b-5p, novel\_79, miR-134-5p, miR-486-5p, miR-322-5p, miR-196a-5p, miR-134, miR-105-2, miR-496, miR-300, miR-3064-5p, miR-3529-3p, miR-200a, miR-1957a, miR-29a-5p, miR-2284y, miR-192-3p, miR-2284a, miR-148b-5p, miR-3071-3p, miR-30f, miR-339a, miR-664-3p, miR-125a-3p, miR-200a-3p, miR-17-3p, miR-450a-2-3p, miR-141-3p, miR-503-3p, miR-223-5p, miR-365a-3p, miR-3154, miR-320a, miR-381-3p, novel\_48, miR-7144-5p, miR-485-5p, miR-16-5p, miR-374b, miR-1-5p, miR-134-5p, miR-339-5p, miR-133b-5p, miR-412-5p, miR-197-3p, miR-223-3p, miR-7b-5p, miR-497-5p, miR-455-5p, miR-30b-3p, miR-16b, miR-668-3p, miR-130b-5p, miR-493-5p, miR-105-5p, miR-455-5p, miR-7-5p, miR-146a, miR-196b-5p, miR-7-1-3p, miR-3074-5p, miR-411b-3p, miR-3065-5p, miR-146b-5p, miR-195a-5p, miR-412-3p, miR-758-5p, miR-17-3p, miR-1a-1-5p, miR-2428, miR-2284w, miR-16a, miR-15a, miR-576-3p, miR-6119-3p, miR-380-5p, miR-30d-3p, miR-15a-5p, miR-124-3p, novel\_133, miR-148a-5p, miR-2284u, miR-493-3p, miR-146a-5p, miR-500a-5p, miR-2285p, miR-3653-3p, miR-21-3p, miR-21-3p, miR-15b-5p, miR-499b-3p, miR-6130, miR-21a-3p, let-7f-1-3p, miR-543-3p, miR-186-5p, let-7g-3p, miR-339b, miR-3184-3p, miR-145a-3p, miR-3074-5p, miR-4510, miR-338-5p, miR-3604, let-7b-3p, miR-129-5p, miR-424-5p, miR-130b-5p, miR-664a, miR-17-3p, miR-105-1, miR-548w, miR-148b-5p, miR-1298-3p, miR-30b-3p, miR-2284r, miR-2284b, miR-124a, miR-424-5p, miR-1b-5p, miR-2957, miR-505, miR-16b, miR-320b, miR-146b, miR-3085-3p, miR-374b-5p, miR-541-5p, miR-2285u, miR-664b, miR-2284g, miR-3064-5p, miR-499a-3p, miR-381-3p, miR-129b-5p, miR-493-5p, miR-1983, miR-668-5p, miR-452-5p, miR-361-3p, miR-2285n, miR-101-3p, miR-2440, miR-628-3p

USP14 ENSOARGO(ubiquitin) miR-300-3p, miR-2483-3p, miR-2284n, miR-545-3p, miR-140-5p, miR-221-5p, miR-2284g, miR-3074-5p, miR-7-1-3p, miR-876-3p, miR-488-3p, miR-301, miR-2448-3p, miR-18a-3p, miR-326-3p, miR-1306-5p, miR-3074-5p, miR-145a-3p, miR-2284v, miR-2284j, miR-22-5p, miR-203b-5p, miR-147-5p, miR-2284k, miR-2285j, miR-2284d, miR-758-5p, miR-148b-5p, miR-455-3p, miR-18a-3p, miR-148a-5p, miR-2284u, miR-1197-5p, miR-330-5p, miR-380-5p, miR-130a-5p, miR-2284y, miR-8485, miR-380-5p, miR-2284b, miR-221-5p, novel\_127, miR-326, miR-30f

SNRPN ENSOARGO(small nuclear ribonucleoprotein) miR-148a-3p, miR-3154, miR-377-3p, miR-27a-3p, miR-20a-3p, miR-26b-5p, miR-101-3p, miR-301a-5p, miR-135a-2-3p, novel\_60, miR-3956-3p, miR-2285x, novel\_73, miR-21b, miR-27b-3p, miR-301b-5p, miR-124-3p, miR-148b-3p, miR-421, miR-27a-3p, miR-127-5p, miR-452-5p, miR-3653-3p, miR-152-3p, miR-2285af, miR-377-3p, novel\_103, miR-26a-5p, miR-3071-3p, miR-2432, miR-124a, let-7c-3p, miR-33a-5p

SESN3 ENSOARGO(sestrin) miR-27b-5p, miR-433-3p, miR-221, miR-2285u, miR-32-5p, miR-499b-3p, miR-499a-3p, miR-25-3p, miR-411b-3p, miR-2285y, miR-33a-3p, miR-34c-3p, miR-222-3p, miR-2285n, miR-92a-3p, miR-495-3p, miR-363-3p, miR-323-3p, miR-432, miR-6529a, miR-101a-5p, miR-222, miR-2285ad, miR-330-3p, novel\_4, miR-221-3p, miR-432-5p, miR-32, miR-330-3p, miR-2285af, miR-466f-3p, miR-92a-3p, miR-202-5p, miR-668-3p, miR-6240, miR-92b-3p, miR-450b-5p, novel\_79, miR-134-5p, miR-486-5p, miR-322-5p, miR-196a-5p, miR-134, miR-105-2, miR-496, miR-300, miR-3064-5p, miR-3529-3p, miR-200a, miR-1957a, miR-29a-5p, miR-2284y, miR-192-3p, miR-2284a, miR-148b-5p, miR-3071-3p, miR-30f, miR-339a, miR-664-3p, miR-125a-3p, miR-200a-3p, miR-17-3p, miR-450a-2-3p, miR-141-3p, miR-503-3p, miR-223-5p, miR-365a-3p, miR-3154, miR-320a, miR-381-3p, novel\_48, miR-7144-5p, miR-485-5p, miR-16-5p, miR-374b, miR-1-5p, miR-134-5p, miR-339-5p, miR-133b-5p, miR-412-5p, miR-197-3p, miR-223-3p, miR-7b-5p, miR-497-5p, miR-455-5p, miR-30b-3p, miR-16b, miR-668-3p, miR-130b-5p, miR-493-5p, miR-105-5p, miR-455-5p, miR-7-5p, miR-146a, miR-196b-5p, miR-7-1-3p, miR-3074-5p, miR-411b-3p, miR-3065-5p, miR-146b-5p, miR-195a-5p, miR-412-3p, miR-758-5p, miR-17-3p, miR-1a-1-5p, miR-2428, miR-2284w, miR-16a, miR-15a, miR-576-3p, miR-6119-3p, miR-380-5p, miR-30d-3p, miR-15a-5p, miR-124-3p, novel\_133, miR-148a-5p, miR-2284u, miR-493-3p, miR-146a-5p, miR-500a-5p, miR-2285p, miR-3653-3p, miR-21-3p, miR-21-3p, miR-15b-5p, miR-499b-3p, miR-6130, miR-21a-3p, let-7f-1-3p, miR-543-3p, miR-186-5p, let-7g-3p, miR-339b, miR-3184-3p, miR-145a-3p, miR-3074-5p, miR-4510, miR-338-5p, miR-3604, let-7b-3p, miR-129-5p, miR-424-5p, miR-130b-5p, miR-664a, miR-17-3p, miR-105-1, miR-548w, miR-148b-5p, miR-1298-3p, miR-30b-3p, miR-2284r, miR-2284b, miR-124a, miR-424-5p, miR-1b-5p, miR-2957, miR-505, miR-16b, miR-320b, miR-146b, miR-3085-3p, miR-374b-5p, miR-541-5p, miR-2285u, miR-664b, miR-2284g, miR-3064-5p, miR-499a-3p, miR-381-3p, miR-129b-5p, miR-493-5p, miR-1983, miR-668-5p, miR-452-5p, miR-361-3p, miR-2285n, miR-101-3p, miR-2440, miR-628-3p

UBE3A ENSOARGO(ubiquitin) miR-148a-3p, miR-3154, miR-377-3p, miR-27a-3p, miR-20a-3p, miR-26b-5p, miR-101-3p, miR-301a-5p, miR-135a-2-3p, novel\_60, miR-3956-3p, miR-2285x, novel\_73, miR-21b, miR-27b-3p, miR-301b-5p, miR-124-3p, miR-148b-3p, miR-421, miR-27a-3p, miR-127-5p, miR-452-5p, miR-3653-3p, miR-152-3p, miR-2285af, miR-377-3p, novel\_103, miR-26a-5p, miR-3071-3p, miR-2432, miR-124a, let-7c-3p, miR-33a-5p



TUBAL3 ENSOARGO( tubulin,

miR-147-5p, miR-374a-3p, miR-22-5p, miR-3958-3p, miR-371a-5p, miR-6529b, miR-2440, miR-218-5p, miR-1307-3p, miR-17-3p, novel\_94, miR-877-3p, miR-376a-3p, miR-2319a, miR-376b-3p, miR-3591-3p, miR-216a-3p, miR-378b, miR-27a-3p, miR-376d, miR-299b-3p, miR-7977, miR-10b, miR-20a-3p, miR-2284g, miR-466f-3p, miR-1185-5p, novel\_51, miR-182-5p, miR-2411-3p, miR-105-5p, miR-377-3p, miR-431-5p, miR-345-5p, miR-654-3p, miR-33a-5p, miR-23a-3p, miR-494-3p, miR-130b-5p, miR-27b-3p, miR-3120-5p, miR-2284x, miR-145a-5p, miR-1285, miR-2355-3p, miR-455-3p, miR-9788-3p, miR-185-5p, miR-376b-3p, miR-26b-3p, miR-145b, miR-27a-3p, miR-339-5p, miR-105-1, novel\_78, novel\_4, miR-548w, miR-122-3p, miR-130b-5p, miR-374b-3p, miR-17-3p, miR-409-3p, miR-5100, miR-338-3p, miR-374a-3p, miR-665-5p, miR-103b, miR-193a-5p, miR-28a-3p, miR-539-5p, novel\_99, miR-1248, miR-7144-5p, miR-339b, miR-345-5p, miR-345-5p, miR-10b-3p, miR-301, miR-365a-3p, miR-377-3p, miR-182-5p, miR-141-3p, miR-21-3p, miR-496-3p, miR-3068-3p, miR-503-3p, miR-2331-3p, miR-221-5p, miR-200a-3p, miR-299-3p, miR-221-5p, miR-28-3p, miR-17-3p, miR-122-3p, miR-345-3p, miR-339a, miR-618, miR-196a-3p, miR-376b-3p, miR-200a, miR-1957a, miR-2432, miR-29a-5p, miR-376a-5p, miR-496, miR-105-2, miR-218-1-3p, miR-128-3p, miR-140-3p, miR-1434-5p, miR-345-3p, miR-23c, miR-23b-3p, miR-431, miR-376a-5p, miR-7641, novel\_79, miR-299a-3p, miR-2285ad

C7 ENSOARGO( compleme: miR-4286, miR-181a-2-3p, miR-490-3p, miR-28b, miR-217, miR-376b-3p, miR-200c, miR-543-5p, miR-191-3p, miR-200c-3p, miR-7641, miR-378h, miR-1271-5p, miR-218-2-3p, miR-30a-5p, miR-3578, miR-200b-3p, miR-128-3p, let-7a-2-3p, miR-300, miR-1306-5p, miR-378c, miR-144, miR-331-3p, miR-551b-3p, miR-486b-3p, miR-767-5p, miR-141-3p, miR-487a-3p, miR-324-5p, miR-365a-3p, miR-381-3p, miR-503-3p, miR-7144-5p, novel\_48, let-7g-3p, miR-345-5p, miR-654-3p, miR-330-3p, miR-665, miR-130a-3p, miR-26b-3p, miR-544b, miR-2355-3p, miR-432-5p, miR-3071-5p, miR-873a-5p, miR-7862, miR-2889, miR-30b-3p, miR-2285x, miR-542-5p, miR-135a-2-3p, novel\_27, miR-24-3p, miR-16a, miR-15a, miR-6402, miR-133a-5p, miR-656-5p, miR-18a-3p, miR-376b-3p, miR-2387, miR-195a-5p, miR-505-3p, miR-146a-5p, miR-216a-5p, miR-542-5p, miR-30d, miR-30b-3p, miR-21-3p, miR-760-3p, miR-1b-3p, miR-3600, miR-505-3p, miR-485-3p, novel\_83, miR-487a-3p, miR-15a-5p, miR-148b-3p, miR-200b, miR-1197-5p, miR-1193, novel\_133, miR-1246, miR-2300b-3p, let-7a-3p, miR-1271, miR-2330-3p, miR-3074-2-3p, miR-378c, miR-424-5p, miR-155-5p, miR-378a-3p, miR-545-3p, miR-204-3p, novel\_25, miR-155-5p, miR-877-5p, miR-544-3p, miR-21a-3p, let-7f-1-3p, novel\_99, miR-582-5p, let-7g-3p, miR-154b-3p, miR-30f, let-7c-3p, miR-33a-5p, miR-382-3p, miR-424-5p, novel\_103, miR-542-5p, novel\_124, miR-105-1, miR-2300a-5p, miR-9788-3p, miR-412-3p, miR-30b-3p, miR-484, miR-378b, miR-16-2-3p, miR-3120-5p, miR-378c, miR-544a, miR-299a-5p, miR-101a-5p, miR-212-3p, miR-219a-2-3p, miR-371a-5p, miR-30b-5p, miR-2285t, miR-7977, miR-664b, miR-20a-3p, miR-376d, miR-378e, miR-7857-3p, miR-3082-5p, miR-29a-5p, miR-148b-5p, miR-450b-5p, miR-205-5p, miR-125a-3p, miR-664-3p, miR-219-3p, novel\_127, miR-152-3p, miR-200a-3p, miR-127-5p, miR-412, miR-431, miR-490-3p, miR-6517, miR-190-1-3p, miR-

miR-1b-3p, miR-15a-5p, miR-532-3p, miR-362-3p, novel\_133, miR-1197-5p, miR-5703, miR-124-3p, miR-378d, miR-216c-5p, miR-2432, miR-466i-5p, miR-21-3p, miR-30b-3p, miR-221-5p, miR-660-5p, miR-378a-3p, miR-221-5p, miR-182-5p, miR-6130, miR-139-5p, miR-204-3p, miR-582-5p, miR-145a-3p, miR-4510, miR-378c, miR-3074-2-3p, miR-206-3p, miR-338-3p, miR-664a, miR-450b-3p, miR-424-5p, miR-222-5p, miR-2285e, miR-500-5p, miR-9788-3p, miR-378b, miR-484, miR-30b-3p, miR-125b-2-3p, miR-412-3p, miR-101a-5p, miR-2426, miR-378c, miR-3120-5p, miR-424-5p, miR-30c-1-3p, miR-758-3p, miR-193a, miR-1306-5p, novel\_103, miR-326, miR-362-3p, miR-2285o, miR-7977, miR-499b-5p, miR-489, miR-3082-5p, miR-378e, miR-376d, miR-199b-5p, miR-361-3p, novel\_94, novel\_60, miR-3059-5p, miR-362-5p, miR-107-5p, miR-335, miR-2284q, miR-2285t, miR-378h, miR-134, miR-615-3p, let-7a-2-3p, miR-128-3p, miR-29b-2-5p, miR-111RA ENSOARGO(interleu1, miR-28b, miR-490-3p, miR-199a-5p, miR-376b-3p, miR-1260a, miR-339a, miR-217, miR-30c-2-3p, miR-2898, miR-370-3p, miR-374c-3p, miR-324-5p, miR-199a-5p, miR-3154, miR-362-5p, let-7g-3p, miR-671-5p, miR-23a-5p, miR-7144-5p, miR-1306-5p, miR-6128, miR-500b-5p, miR-378c, miR-365a-5p, miR-135a-1-3p, miR-410-5p, miR-3969, miR-133b-5p, miR-377-5p, miR-130a-3p, miR-665, miR-503-5p, miR-185-5p, miR-2285g, miR-653, miR-873a-5p, miR-374b-3p, miR-1260b, miR-30b-3p, miR-363-5p, miR-654-3p, miR-345-5p, miR-296-3p, miR-503-5p, miR-2285l, miR-660, miR-670-3p, miR-146b-3p, miR-376b-3p, miR-18a-3p, miR-450b-3p, miR-1291, miR-6395, miR-195a-5p, miR-379-5p, miR-9851-3p, miR-371b-3p, miR-2428, miR-326-3p, miR-15a, miR-16a, novel\_1, miR-502b, miR-18a-3p, miR-328-3p, miR-2284h-5p, miR-193b-5p, miR-378i, miR-378a-3p, miR-217-5p, miR-142-3p, miR-493-3p, miR-133a-3p, miR-664-5p, miR-503-5p, miR-2285w, miR-329a-5p, miR-376c-3p, miR-377-5p, miR-376a-3p, miR-767-5p, miR-450b-3p, miR-208b-5p, miR-874-5p, miR-4492, miR-3969, miR-219b-3p, miR-19b-1-5p, miR-1197-3p, miR-6134, miR-365a-5p, miR-4510, novel\_42, miR-345-5p, miR-345-5p, miR-767, miR-1814c, miR-543-3p, miR-190a-3p, miR-625-5p, miR-450a-1-3p, miR-3154, miR-6130, miR-377-3p, miR-154b-5p, miR-223-5p, miR-3068-3p, miR-545-3p, miR-552-3p, miR-21-3p, miR-2284m, miR-299-3p, miR-125a-3p, miR-219-3p, miR-2285af, miR-345-3p, miR-185-3p, miR-217, miR-216a-5p, miR-181b-1-3p, miR-181a-2-3p, miR-4286, miR-218-1-3p, miR-16-1-3p, miR-345-3p, miR-217-5p, miR-188-3p, miR-5703, miR-140-3p, miR-758-5p, miR-545-5p, miR-2284z, miR-450a-1-3p, miR-299a-3p, miR-505-3p, miR-3600, miR-203b-5p, miR-656-5p, miR-133a-5p, miR-576-3p, miR-219a-2-3p, miR-3956-3p, novel\_60, miR-3059-5p, miR-452-5p, miR-495-3p, miR-450b-3p, miR-505-3p, miR-140-5p, miR-3065-5p, miR-3591-3p, miR-411b-3p, miR-299b-3p, miR-181b-3p, miR-677, miR-2319b, miR-1185-5p, miR-452-5p, miR-377-3p, miR-2411-3p, miR-365b-5p, miR-345-5p, miR-2310, let-7j, miR-668-3p, miR-16-1-3p, miR-30b-3p, miR-2284aa, miR-4791, miR-708-3p, miR-19b-2-5p, miR-30b-3p, miR-450c-3p, miR-185-5p, miR-3535, miR-9788-3p, miR-548w, novel\_4, miR-1343-3p, miR-409b

|        |                    |                                                                                                                                                                                                                                                                                                                                                                                                                                                                                                                                                                                                                                                                                                                                                                                                                                                                                                                                                                                                                                                                                                                                                                                                                                                                                                                                                                                                                                                                                                                                                                                                                                                                                                                                                                                                                                                                                                                                                                                                                        |
|--------|--------------------|------------------------------------------------------------------------------------------------------------------------------------------------------------------------------------------------------------------------------------------------------------------------------------------------------------------------------------------------------------------------------------------------------------------------------------------------------------------------------------------------------------------------------------------------------------------------------------------------------------------------------------------------------------------------------------------------------------------------------------------------------------------------------------------------------------------------------------------------------------------------------------------------------------------------------------------------------------------------------------------------------------------------------------------------------------------------------------------------------------------------------------------------------------------------------------------------------------------------------------------------------------------------------------------------------------------------------------------------------------------------------------------------------------------------------------------------------------------------------------------------------------------------------------------------------------------------------------------------------------------------------------------------------------------------------------------------------------------------------------------------------------------------------------------------------------------------------------------------------------------------------------------------------------------------------------------------------------------------------------------------------------------------|
|        |                    | novel_103, miR-664-3p, miR-200c, miR-127-5p, miR-200c-3p, miR-2385-3p, miR-23a-3p, miR-2285w, miR-421-5p, novel_23, miR-542-3p, miR-200b-3p, miR-101c, miR-21-5p, miR-411-3p, miR-582-3p, miR-429-3p, miR-2284h-5p, miR-2285e, miR-23b-3p, miR-2285g, miR-200b, miR-23c, miR-3604, miR-135a-1-3p, miR-708-5p, miR-421-5p, miR-625-3p, miR-2285t, miR-28-5p, miR-2285f, miR-495-3p, novel_60, miR-3956-3p, novel_27, miR-381-3p, miR-23b, miR-21c, miR-2285ab, miR-2285c, miR-335-3p, miR-7975, miR-2312, miR-664b                                                                                                                                                                                                                                                                                                                                                                                                                                                                                                                                                                                                                                                                                                                                                                                                                                                                                                                                                                                                                                                                                                                                                                                                                                                                                                                                                                                                                                                                                                      |
| EEF1A1 | ENSOARGO( eukaryot | miR-500b-5p, miR-362-5p, miR-361-3p, miR-23a-3p, miR-214, miR-214-3p, novel_127, miR-21-3p, miR-664-3p, miR-500-5p, miR-486-5p, miR-432-5p, miR-23b-3p, miR-505-5p, miR-656-3p, novel_69, miR-23c, miR-2483-3p, miR-7977, miR-664b, miR-18a-3p, miR-7975, miR-378d, miR-18a-3p, miR-23b, miR-433-3p, miR-362-5p, miR-3154, miR-484, miR-361-3p, miR-432                                                                                                                                                                                                                                                                                                                                                                                                                                                                                                                                                                                                                                                                                                                                                                                                                                                                                                                                                                                                                                                                                                                                                                                                                                                                                                                                                                                                                                                                                                                                                                                                                                                                |
| STAT2  | ENSOARGO( signal t | miR-378d, miR-848b, miR-124a, miR-2284b, miR-130b-3p, miR-487b-5p, miR-214-3p, miR-199a-3p, miR-323b-3p, miR-425-3p, miR-539-5p, miR-147a, miR-148b-5p, miR-181b-2-3p, miR-362-3p, miR-2284r, miR-329-3p, miR-541, miR-301b-5p, miR-1298-5p, miR-323b, miR-501-3p, novel_111, miR-423-5p, miR-3956-3p, miR-885-5p, miR-2284j, miR-2440, miR-301a-5p, miR-203-3p, miR-4443, miR-500-3p, miR-2284g, miR-126b-5p, miR-211-5p, miR-299b-5p, miR-140-5p, miR-221, miR-181b-1-3p, miR-2424, miR-380-3p, miR-143-3p, miR-329a-5p, miR-2285w, miR-503-5p, miR-202-5p, miR-30b, miR-345-3p, miR-92a-1-5p, miR-422a, miR-7859, miR-2284h-5p, miR-18a-3p, miR-212-5p, miR-30d-3p, miR-218-1-3p, miR-148a-5p, miR-2284u, miR-30c-5p, miR-378i, miR-193b-5p, miR-378a-3p, miR-769-5p, miR-6525, miR-224-5p, miR-3184-5p, miR-122-5p, miR-3074-5p, miR-129-2-3p, miR-665-5p, miR-214, miR-129-5p, miR-874-5p, miR-454-3p, miR-130b-5p, miR-30a-3p, miR-665, miR-664a-5p, miR-301a-3p, miR-2331-3p, miR-548o-3p, miR-296-3p, miR-543-3p, miR-1895, miR-186-5p, miR-2285c, miR-129b-3p, miR-30d-5p, miR-433-3p, miR-432-3p, miR-432-3p, let-7j, miR-380-5p, miR-483-3p, miR-296-3p, miR-365b-5p, miR-105-5p, miR-2411-3p, novel_51, miR-194-3p, novel_116, miR-149-5p, miR-3955-5p, miR-27b-3p, miR-188-5p, miR-708-3p, miR-22-3p, miR-197-3p, novel_23, miR-301b-3p, miR-29c-3p, miR-29a, miR-28c, miR-299b-3p, miR-411b-3p, miR-677, miR-181b-3p, novel_68, miR-3074-5p, miR-329-5p, miR-378f, miR-148a-3p, miR-1306, miR-148b-5p, miR-2284y, novel_127, miR-152-3p, miR-219-3p, miR-505-5p, miR-758-5p, miR-2284z, miR-129-1-3p, miR-2285ad, miR-299a-3p, miR-412, miR-1224-5p, miR-18b-5p, miR-30c, miR-330-5p, miR-2284v, miR-193a-5p, miR-2284k, miR-6740-5p, miR-574-5p, miR-874-3p, miR-2285aa, miR-1271, miR-767, miR-329b, miR-329a, miR-1248, miR-30a-5p, miR-124-3p, miR-376b, miR-3955-3p, miR-1248, miR-30a-5p, miR-124-3p, miR-376b, miR-3955-3p, miR-3965, miR-224-5p, miR-148b-5p, miR-2284x, miR-1343-3p, miR-224-5p |
| KCNMA1 | ENSOARGO( potassiu |                                                                                                                                                                                                                                                                                                                                                                                                                                                                                                                                                                                                                                                                                                                                                                                                                                                                                                                                                                                                                                                                                                                                                                                                                                                                                                                                                                                                                                                                                                                                                                                                                                                                                                                                                                                                                                                                                                                                                                                                                        |

novel\_17, miR-2285v, miR-760-3p, miR-181b-5p, miR-2898, miR-17-3p, miR-21-3p, miR-1388-3p, miR-363-5p, miR-181a-5p, miR-541, miR-301b-5p, miR-30b-3p, miR-501-3p, miR-501-3p, miR-30b-3p, miR-2889, miR-3120-5p, miR-129-1-3p, miR-214-5p, miR-671-3p, miR-301a-5p, miR-331-3p, miR-17-3p, miR-4726-5p, miR-874-5p, miR-129-2-3p, miR-541-3p, miR-181d-5p, miR-17-3p, miR-346, miR-361-3p, miR-181c-5p, miR-502-3p, novel\_27, miR-361-3p, miR-299b-5p, miR-452-3p, miR-2331-3p, miR-7977, miR-365a-3p, miR-489, miR-500-3p, miR-130a-3p, miR-185-5p, let-7g-5p, miR-2285g, miR-2284d, miR-181a-5p, miR-3071-5p, miR-194-5p, miR-29b, miR-382, miR-345-5p, miR-378b, miR-10a-5p, miR-34b, miR-670-3p, miR-29a-3p, miR-2404, miR-2285ab, miR-450b-3p, miR-505-3p, miR-6516-3p, miR-342-3p, miR-3959-3p, miR-2428, miR-449a, miR-6402, let-7i, miR-34c, novel\_1, miR-502b, miR-199c, miR-222, miR-134, miR-345-3p, miR-29d-3p, miR-582-3p, let-7d, miR-10a-5p, miR-128-3p, miR-29b-2-5p, miR-199a-5p, miR-376c-5p, miR-2285af, miR-217, miR-339a, let-7c-5p, miR-30c-2-3p, miR-181b-5p, miR-543-5p, miR-3957-5p, miR-141-3p, miR-769, miR-374c-3p, miR-34c-5p, miR-3957, miR-324-5p, miR-199a-5p, miR-320a, miR-362-5p, miR-485-5p, miR-376c-5p, miR-6128, miR-323-3p, miR-29b-3p, miR-2300a-5p, miR-151a-3p, miR-27a-3p, miR-2285e, miR-500-5p, miR-9788-3p, miR-216a-3p, miR-221-3p, miR-10b, miR-125b-2-3p, miR-3120-5p, miR-1839-3p, let-7a-5p, miR-30c-1-3p, novel\_115, miR-320b, miR-342, miR-3955-3p, let-7e, miR-489, miR-7857-3p, miR-27a-3p, let-7d-5p, miR-199b-5p, miR-129b-5p, novel\_94, miR-877-3p, miR-541-3p, miR-194b-5p, miR-2285f, miR-362-5p, miR-219a-2-3p, miR-9-3p, miR-769-5p, miR-2284q, miR-548e-3p, miR-505-3p, miR-340-5p, miR-148b-3p, miR-383-5p, miR-151-5p, novel\_83, miR-140-3p, miR-5703, miR-124-3p, miR-4429, miR-216c-5p, miR-2432, miR-196a-3p, miR-760-3p, miR-320d, miR-2284m, miR-21-3p, miR-34b-5p, miR-140-5p, miR-21-3p, miR-139-5p, miR-6130, miR-204-3p, novel\_25, miR-22-3p, miR-21a-3p, miR-2312, novel\_99, miR-4510, miR-10b-5p, miR-338-3p, let-7b-5p, miR-222-3p, miR-29b-2-5p, miR-655-3p, miR-6516-3p, miR-450b-3p, miR-208b-5p, miR-339-5p, miR-134-3p, novel\_116, miR-411-5p, miR-708-3p, novel\_23, miR-22-3p, miR-450c-3p, miR-188-5p, miR-27b-3p, miR-2284x, miR-432-3p, miR-432-3p, miR-2411-3p, miR-196b-5p, miR-374c-3p, miR-320c, miR-148a-3p, miR-376b-5p, miR-3501-3p, miR-216a-3p, let-

SF1

ENSOARGO( splicing

EIF2S2

ENSOARGO( eukaryot

novel\_79, miR-7641, miR-18b-5p, miR-429-3p, miR-2284z, miR-582-3p, miR-486-5p, miR-302a-5p, miR-9-5p, miR-6516-5p, miR-378h, miR-200b-3p, miR-128-3p, miR-10a-5p, let-7a-2-3p, miR-582-3p, miR-300, miR-3529-3p, miR-29a-5p, miR-1957a, miR-2285b, miR-1271-3p, miR-192-3p, miR-24-2-5p, miR-339a, miR-2285af, miR-205-5p, miR-200c, miR-543-5p, novel\_127, miR-181b-5p, miR-200c-3p, miR-370-3p, miR-2285aa, miR-1271, miR-874-3p, miR-324-5p, miR-365a-3p, miR-93-5p, miR-320a, miR-18a, miR-23b, miR-17-5p, miR-488-3p, novel\_48, miR-20b-5p, miR-1814c, miR-10b-3p, miR-329b, let-7g-3p, miR-133a-3p, miR-378c, miR-10b-3p, miR-145-3p, miR-93, miR-374a-3p, miR-3969, miR-135a-5p, miR-5100, miR-374b-3p, miR-204-5p, miR-130a-3p, miR-339-5p, miR-26b-3p, miR-20b, miR-3071-5p, miR-145a-5p, miR-19b-2-5p, miR-653, miR-181a-5p, miR-7b-5p, miR-542-3p, miR-1434-3p, miR-380-3p, miR-30b-3p, miR-16-1-3p, let-7f-2-3p, let-7f-2-3p, miR-493-5p, let-7a-2-3p, miR-654-3p, miR-432-3p, miR-17-5p, miR-106a-5p, miR-7-5p, miR-377-3p, miR-660, miR-466f-3p, miR-124-5p, miR-655-5p, miR-320b, miR-7-1-3p, miR-10a-5p, miR-329-5p, miR-216b-3p, miR-320c, miR-323a-5p, miR-670-3p, miR-374c-3p, miR-150-5p, miR-3591-3p, miR-216a-3p, miR-18a-3p, miR-18b, miR-378f, miR-505-3p, miR-135b-5p, miR-19a-3p, miR-374c-5p, novel\_27, miR-301b-3p, miR-211, miR-323c, miR-20a-5p, miR-22-5p, miR-147-5p, miR-1b-3p, miR-30d-3p, miR-505-3p, miR-18a-3p, miR-106a, miR-199a-3p, miR-616-3p, miR-7859, miR-23b-3p, miR-23c, miR-340-5p, miR-200b, miR-222-5p, miR-124-3p, miR-378a-3p, miR-140-3p, miR-378i, miR-16-1-3p, miR-19b-3p, miR-33b-3p, miR-4429, miR-20a, miR-329a-5p, miR-380-3p, miR-125b-2-3p, miR-500a-5p, miR-219b-5p, miR-422a, miR-196a-3p, miR-106a, miR-320d, miR-202-5p, miR-21-3p, miR-154a-3p, miR-532-5p, miR-378a-3p, miR-504-5p, miR-660-5p, miR-582-5p, miR-10a, miR-301a-3p, miR-377-

miR-708-5p, miR-450b-3p, miR-30a-3p, miR-324-3p, miR-66b, miR-30e-3p, miR-3184-5p, miR-346, miR-206-3p, miR-378c, miR-3184-3p, miR-3074-5p, miR-4510, miR-885-3p, miR-625-5p, miR-186-5p, miR-1827, miR-345-5p, miR-411, miR-299, miR-450a-1-3p, miR-877-5p, miR-27a-5p, miR-6130, miR-193b-3p, miR-370-5p, miR-296-3p, miR-2331-3p, miR-140-5p, miR-221-5p, miR-545-3p, miR-378a-3p, miR-221-5p, miR-34b-5p, miR-466i-5p, miR-760-3p, miR-324-3p, miR-185-3p, miR-92a-1-5p, miR-422a, miR-146a-5p, miR-2411, miR-486-3p, miR-143-3p, miR-29b-1-5p, miR-216c-5p, miR-16-1-3p, miR-34a-5p, miR-378d, miR-148a-5p, miR-2284u, miR-378a-3p, miR-1197-5p, miR-217-5p, miR-378i, novel\_133, miR-362-3p, miR-2408, miR-2300b-3p, miR-532-3p, novel\_83, miR-328-3p, miR-210-3p, miR-23c, miR-222-5p, miR-3600, miR-505-3p, miR-30d-3p, miR-3968, miR-4726-5p, miR-450a-5p, miR-335, miR-1973, miR-371a-5p, miR-107-5p, miR-301a-5p, miR-423-5p, miR-877-3p, miR-1296-5p, miR-194b-5p, novel\_60, miR-3059-5p, miR-3956-3p, miR-877-3p, novel\_94, miR-1983, miR-181a-3p, miR-378j, miR-27a-3p, miR-3596, miR-378g, miR-378e, miR-499b-5p, miR-2284g, miR-3064-5p, miR-20a-3p, miR-146b, miR-103a-2-5p, miR-491-5p, miR-3085-3p, miR-505, miR-29b-1-5p, miR-362-3p, novel\_115, miR-326, miR-1306-5p, miR-8485, miR-378d, miR-23a-3p, miR-33a-5p, miR-744-3p, miR-362-3p, miR-378c, miR-1388-5p, miR-299a-5p, miR-450b-5p, miR-101a-5p, miR-1a-3p, miR-378b, miR-329-3p, miR-143-5p, miR-301b-5p, miR-148b-5p, miR-9788-3p, miR-421, miR-27a-3p, miR-222-5p, miR-145b, miR-1343-3p, miR-409b, miR-28-5p, miR-486b-3p, miR-767-5p, miR-331-3p, miR-6740-5p, miR-2433, miR-370-5p, miR-378c, miR-181c-3p, miR-1260b, miR-193a-5p, miR-6128, novel\_42, miR-7144-5p, miR-1248, miR-767, miR-345-5p, miR-329a, miR-488-3p, miR-503-3p, miR-301, miR-324-5p, miR-34c-5p, miR-2285aa, miR-1271, miR-871-3p, novel\_96, miR-9851-3p, novel\_73, miR-27b-5p, miR-124-3p, miR-296-5p, miR-1843b-5p, miR-5100, miR-2284s, miR-124a

CEACAM19 ENSOARGO(carcinoe)

ACADSB ENSOARGO(acyl-CoA)

miR-374b, miR-1306-5p, miR-204-5p, miR-2332, miR-135a-1-3p, miR-34c-3p, miR-1-5p, miR-135a-5p, miR-331-3p, miR-34c-5p, miR-2284n, miR-141-3p, miR-370-3p, let-7g-3p, miR-7144-5p, miR-23a-5p, miR-488-3p, miR-320a, miR-28b, miR-2478, miR-24-2-5p, miR-2284a, miR-3529-3p, miR-4286, miR-30a-3p, miR-29b-2-5p, miR-181b-5p, miR-200c-3p, miR-2898, miR-450a-2-3p, miR-92a-3p, miR-6119-5p, miR-200c, miR-2285af, miR-1260a, miR-339a, miR-6516-5p, miR-302a-5p, miR-24-2-5p, miR-545-5p, miR-7641, let-7a-2-3p, miR-128-3p, miR-134, miR-323c, miR-3959-3p, miR-371b-3p, miR-211, miR-326-3p, novel\_27, miR-449a, miR-2285x, miR-92a-3p, miR-147-5p, miR-22-5p, miR-6402, miR-33a-3p, miR-382-5p, miR-34c, miR-670-3p, miR-34b, miR-2404, miR-7-1-3p, miR-450b-3p, miR-135b-5p, miR-7975, miR-2285ab, miR-345-5p, miR-130b-5p, miR-363-5p, miR-101-5p, miR-452-5p, miR-125a-5p, miR-1343-5p, miR-432-5p, miR-2284d, miR-544b, miR-6238, miR-133b-5p, miR-26b-3p, miR-377-5p, miR-665, miR-1260b, miR-2284ab, miR-30b-3p, miR-7862, miR-1285, miR-1434-3p, miR-181a-5p, miR-873a-5p, miR-653, miR-374b-3p, miR-3071-5p, miR-338-3p, miR-6134, miR-539-5p, miR-2330-3p, miR-3074-2-3p, miR-6516-3p, miR-155-5p, miR-208b-5p, miR-338-5p, miR-29b-2-5p, miR-320e, miR-19b-1-5p, miR-6516, miR-544-3p, miR-877-5p, miR-155-5p, novel\_25, miR-204-3p, miR-221-5p, let-7g-3p, miR-2312, novel\_99, miR-216c-5p, miR-466i-5p, miR-320d, miR-2284m, miR-21-3p, miR-221-5p, miR-34b-5p, miR-125b, miR-222-5p, miR-532-3p, miR-548e-3p, miR-3600, miR-4429, miR-1246, miR-5703, miR-154a, miR-219a-2-3p, miR-212-3p, miR-181d-5p, miR-2285f, miR-335, miR-450a-5p, miR-2284q, miR-107-5p, miR-371a-5p, miR-2285y, miR-489, miR-7977, miR-129b-5p, miR-758-3p, miR-652-5p, miR-3955-3p, miR-1468, miR-5126, miR-1306-5p, miR-326, miR-320h, miR-216a-3p, miR-151a-3p, miR-222-5p, miR-101a-let-7b-5p, miR-378c, let-7b, miR-378c, miR-214, miR-126b-3p, let-7f, miR-29b-3p, miR-365a-3p, let-7i-5p, novel\_32, miR-378a-3p, miR-3065-3p, miR-885-3p, miR-3613-5p, miR-3065-3p, let-7g, miR-181a-2-3p, miR-4286, let-7f-5p, miR-98-5p, let-7k, miR-152-3p, miR-185-3p, let-7c-5p, miR-217, miR-422a, miR-148b-3p, miR-378h, miR-212-5p, let-7d, miR-941, miR-885-3p, miR-1961, miR-378i, miR-196a-5p, miR-378a-3p, miR-217-5p, miR-29d-3p, miR-29c-3p, miR-29a, miR-1843a-3p, miR-3613, let-7i, miR-1307-5p, miR-29a-3p, miR-378e, let-7d-5p, miR-378f, let-7e-5p, miR-148a-3p, miR-378d, let-7a-5p, let-7c-3p, miR-196b-5p, let-7e, miR-214-3p, miR-7-5p, let-7g-5p, novel\_78, miR-340-3p, miR-29b, miR-378c, miR-7b-5p, miR-378b, miR-3962

RBM43

ENSOARGO(RNA bind

MUL1

ENSOARGO(mitochon



miR-199b-5p, miR-29c-3p, miR-193b-3p, miR-29a, miR-62b-3p, miR-421-5p, novel\_87, miR-299b-3p, miR-181b-3p, miR-320c, miR-677, miR-329-5p, miR-3074-5p, miR-2284e, miR-3141, miR-3065-5p, miR-432-3p, miR-2284l, miR-432-3p, miR-503-3p, miR-6240, miR-196b-5p, miR-193a-3p, novel\_51, miR-2411-3p, miR-3141, miR-134-3p, miR-3535, miR-411-5p, miR-3955-5p, miR-16b, miR-2284x, miR-497-5p, miR-26a-2-3p, miR-223-3p, novel\_23, miR-22-3p, miR-2284v, miR-28a-3p, let-7e-3p, novel\_42, miR-144-5p, miR-193a-5p, miR-16-5p, miR-134-5p, miR-3432a, miR-2284k, miR-1271, miR-2355-5p, miR-376c-5p, miR-200a-5p, miR-450b-5p, miR-450c-5p, miR-3064-5p, miR-28-3p, novel\_127, miR-30f, miR-758-5p, miR-322-5p, miR-9-5p, novel\_121, miR-134-5p, miR-2284z, miR-429-3p, miR-299a-3p, miR-2285ad, miR-412, miR-155-5p, miR-1290, miR-196a-5p, miR-23b-5p, novel\_111, miR-877-3p, miR-361-3p, miR-423-5p, miR-2447, miR-9-5p, miR-2284j, miR-3964, miR-2440, novel\_82, miR-2483-3p, miR-378g, miR-499a-3p, miR-144-5p, miR-2319b, miR-504, miR-3963, miR-335-3p, miR-221, miR-140-5p, miR-214-3p, miR-103a-2-5p, miR-199b-5p, miR-16b, miR-505, miR-29b-1-5p, miR-323b-3p, miR-1298-3p, miR-2459, miR-455-3p, novel\_78, miR-1343-3p, miR-330-3p, miR-181b-2-3p, miR-1388-5p, miR-323b, miR-224-5p, miR-346, miR-6525, miR-181c-5p, miR-3184-5p, miR-122-5p, miR-3074-5p, miR-214, miR-4492, miR-874-5p, miR-129-5p, miR-30e-3p, miR-665, miR-30a-3p, miR-499b-3p, miR-15b-5p, miR-504-5p, miR-30c-1-3p, miR-2331-3p, miR-216b-3p, miR-186-5p, miR-1827, miR-2285c, miR-181b-1-3p, miR-2424, miR-329a-5p, miR-202-5p, novel\_17, miR-345-3p, miR-324-3p, miR-18a-3p, miR-30d-3p, novel\_73, miR-133a-3p, miR-24-3p, miR-371b-3p, miR-2428, novel\_101, miR-495-3p, miR-17-3p, novel\_1, miR-128-1-5p, miR-147-5p, miR-656-5p, miR-92-5p, miR-902b-5p, miR-15a, miR-16a, miR-90a-3p, miR-486-3p, miR-541-3p, miR-147-3p, miR-885-3p, miR-486b-3p, miR-885-3p, miR-541, miR-1285, miR-431-3p

NEK3 ENSOARGO(NIMA-rel:5p, miR-885-3p, miR-541, miR-1285, miR-431-3p  
let-7c-5p, let-7k, let-7e, miR-2898, miR-98-5p, let-7f-5p, miR-363-5p, let-7a-5p, let-7g, miR-296-5p, miR-1961, miR-2300b-3p, miR-1843b-5p, miR-128-3p, miR-2889, miR-378d, let-7d, miR-9788-3p, miR-500-5p, miR-328-3p, let-7g-5p, let-7i, let-7f, miR-502-5p, miR-1306-3p, miR-874-5p, miR-1296-5p, miR-133a-3p, let-7b, let-7b-5p, miR-500b-5p, miR-362-5p, miR-362-5p, miR-1306-3p, miR-216a-3p, miR-625-5p, miR-6395, let-7e-5p, miR-671-5p, miR-10b-3p, miR-133b-3p, miR-504, miR-504-5p, novel\_68, let-7d-5p, let-7i-5p, miR-154b-5p

SEMA6B ENSOARGO( sema dom:5p, miR-885-3p, miR-541, miR-1285, miR-431-3p  
let-7c-5p, let-7k, let-7e, miR-2898, miR-98-5p, let-7f-5p, miR-363-5p, let-7a-5p, let-7g, miR-296-5p, miR-1961, miR-2300b-3p, miR-1843b-5p, miR-128-3p, miR-2889, miR-378d, let-7d, miR-9788-3p, miR-500-5p, miR-328-3p, let-7g-5p, let-7i, let-7f, miR-502-5p, miR-1306-3p, miR-874-5p, miR-1296-5p, miR-133a-3p, let-7b, let-7b-5p, miR-500b-5p, miR-362-5p, miR-362-5p, miR-1306-3p, miR-216a-3p, miR-625-5p, miR-6395, let-7e-5p, miR-671-5p, miR-10b-3p, miR-133b-3p, miR-504, miR-504-5p, novel\_68, let-7d-5p, let-7i-5p, miR-154b-5p

CEACAM16 ENSOARGO( carcinoe:5p, miR-885-3p, miR-541, miR-1285, miR-431-3p  
let-7c-5p, let-7k, let-7e, miR-2898, miR-98-5p, let-7f-5p, miR-363-5p, let-7a-5p, let-7g, miR-296-5p, miR-1961, miR-2300b-3p, miR-1843b-5p, miR-128-3p, miR-2889, miR-378d, let-7d, miR-9788-3p, miR-500-5p, miR-328-3p, let-7g-5p, let-7i, let-7f, miR-502-5p, miR-1306-3p, miR-874-5p, miR-1296-5p, miR-133a-3p, let-7b, let-7b-5p, miR-500b-5p, miR-362-5p, miR-362-5p, miR-1306-3p, miR-216a-3p, miR-625-5p, miR-6395, let-7e-5p, miR-671-5p, miR-10b-3p, miR-133b-3p, miR-504, miR-504-5p, novel\_68, let-7d-5p, let-7i-5p, miR-154b-5p

let-7f-2-3p, let-7f-2-3p, miR-125a-5p, miR-466f-3p, miR-224-5p, miR-365b-5p, miR-197-5p, miR-194a, miR-185-5p, miR-134-3p, miR-149-5p, miR-194-3p, miR-31-5p, miR-339-5p, miR-30b-3p, miR-3432b, miR-1260b, miR-27b-3p, miR-708-3p, miR-2113, miR-1843b-5p, miR-1434-3p, miR-22-3p, miR-194-5p, miR-24-3p, miR-326-3p, miR-2428, miR-199b-5p, miR-3957-3p, miR-22-5p, miR-6123, miR-4324, miR-146b-3p, miR-320c, miR-6535, novel\_68, miR-1291, miR-378f, miR-379-5p, miR-2387, miR-199a-5p, novel\_39, miR-2284y, miR-2284a, miR-450a-2-3p, miR-191-3p, miR-1260a, miR-339a, miR-378h, miR-2411-5p, novel\_121, miR-6517, miR-1224-5p, novel\_79, miR-2427, miR-330-5p, miR-1260b, miR-378c, miR-365a-5p, miR-6128, miR-331-5p, miR-486b-3p, miR-331-3p, miR-125b-5p, miR-769, miR-199a-5p, miR-324-5p, miR-154b-5p, miR-874-3p, miR-370-3p, miR-125a, miR-615-5p, miR-329a, miR-485-5p, miR-331-5p, miR-320a, miR-378d, miR-8485, miR-1b-5p, miR-127-3p, novel\_124, miR-25-5p, miR-199b-5p, miR-103a-2-5p, miR-320b, miR-326, miR-362-3p, miR-147a, miR-142-3p, miR-1185-3p, novel\_4, novel\_78, miR-1343-3p, miR-409b, miR-27a-3p, miR-362-3p, miR-378c, miR-1839-5p, miR-378b, miR-484, miR-329-3p, miR-1298-5p, miR-30b-3p, miR-877-3p, miR-423-5p, miR-212-3p, miR-1296-5p, miR-194b-5p, miR-452-5p, miR-499a-5p, miR-4726-5p, miR-382-3p, miR-769-5p, miR-107-5p, miR-378e, miR-378g, miR-3082-5p, miR-27a-3p, miR-1185-2-3p, miR-2284g, miR-452-3p, miR-7977, novel\_94, miR-199b-5p, miR-376a-5p, miR-142a-3p, miR-2411, miR-486-3p, miR-5100, miR-345-3p, miR-320d, miR-760-3p, miR-221-5p, miR-324-3p, miR-422a, miR-125b, miR-92a-1-5p, miR-3960, miR-1b-3p, miR-3600, miR-4429, miR-378d, miR-2284u, miR-378i, novel\_133, miR-362-3p, miR-2300b-3p, miR-378a-3p, miR-6525, miR-769-5p, miR-224-5p, miR-3184-5p, miR-338-3p, miR-6134, miR-378c, miR-145a, miR-199b-5p, miR-9-3p, miR-211, miR-181d-5p, miR-2285x, miR-9-5p, miR-885-5p, miR-2284q, miR-379-3p, miR-628-3p, novel\_87, miR-4443, miR-320c, miR-299b-3p, miR-3596, miR-211-5p, miR-499b-5p, miR-378b, miR-2319b, miR-329-5p, miR-2284g, miR-664b, miR-135b-5p, novel\_94, miR-9-3p, miR-2319a, miR-335-3p, miR-668-5p, miR-378b, miR-150-5p, miR-221, miR-199b-5p, miR-539-3p, miR-8485, miR-193a, miR-30c-1-3p, miR-652-5p, miR-628-5p, miR-101-5p, miR-676-3p, miR-466f-3p, miR-199b-5p, miR-196b-5p, miR-505, novel\_103, miR-320b, miR-149-5p, miR-221-3p, miR-539-5p, miR-432-5p, miR-188-5p, miR-2284aa, miR-2284ab, miR-181a-5p, miR-432, miR-181c-5p, miR-3074-2-3p, miR-2284v, miR-539-5p, miR-204-5p, miR-331-5p, miR-3604, miR-135a-5p, miR-15b-3p, miR-222-3p, miR-199a-5p, miR-30c-1-3p, miR-1248, miR-7144-5p, novel\_48, miR-10b-3p, miR-3154, miR-320a, miR-331-5p, let-7f-1-3p, miR-199a-5p, miR-2284y, miR-1957a, miR-376a-5p, miR-183-5p, miR-329a-5p, miR-299-3p, miR-181b-5p, miR-2284m, miR-320d, miR-30c-2-3p, miR-3071-3p, miR-664-3p, miR-2285af, miR-196a-3p, miR-2284z, miR-7859, miR-487a-3p, miR-9-5p, miR-299a-3p, miR-222, miR-548e-3p, miR-2284u, miR-664-5p, miR-4429, novel\_73, miR-582-3p, miR-411-3p, miR-196a-5p

DNAI1 ENSOARGO(dynein,

CDC73 ENSOARGO(cell div

miR-320b, novel\_103, miR-326, miR-3085-3p, miR-424-5p, miR-30c-1-3p, miR-758-3p, miR-484, miR-10b, miR-143-5p, miR-412-3p, miR-30b-3p, miR-2426, miR-544a, miR-3120-5p, miR-105-1, novel\_4, miR-2300a-5p, miR-27a-3p, miR-221-3p, miR-9788-3p, miR-2285e, miR-2285y, miR-4726-5p, miR-335, miR-450a-5p, miR-2285t, miR-2284q, miR-3059-5p, miR-541-3p, miR-361-3p, miR-199b-5p, miR-877-3p, miR-3064-5p, miR-7857-3p, miR-27a-3p, miR-216a-5p, miR-185-3p, miR-320d, miR-760-3p, miR-34b-5p, miR-21-3p, miR-2887, miR-29b-1-5p, miR-2411, miR-2300b-3p, miR-1246, miR-2904, miR-1197-5p, miR-5703, miR-1193, miR-4429, miR-15a-5p, miR-222-3p, miR-19b-1-5p, miR-17-3p, miR-664a, miR-424-5p, miR-539-5p, miR-145a-3p, miR-425-5p, miR-10b-5p, miR-206-3p, miR-6134, miR-338-3p, miR-27b-5p, miR-18a-5p, miR-370-5p, miR-532-5p, miR-544-3p, miR-193b-3p, miR-323-5p, miR-139-5p, miR-22-3p, miR-204-3p, miR-455-5p, miR-466f-3p, miR-654-3p, miR-138, miR-30b-3p, miR-7862, miR-455-5p, miR-133b-5p, miR-26b-3p, miR-2285g, miR-185-5p, miR-544b, miR-15a, miR-34c, miR-16a, miR-203b-5p, miR-502b, novel\_101, miR-1193, miR-17-3p, miR-495-3p, miR-211, miR-371b-3p, miR-24-3p, miR-449a, novel\_27, miR-326-3p, miR-2428, miR-18b, miR-2387, miR-1291, miR-9851-3p, miR-6395, miR-195a-5p, miR-320b, miR-10a-5p, miR-2404, miR-323a-5p, miR-146b-3p, miR-670-3p, miR-34b, miR-2285af, miR-30c-2-3p, miR-217, miR-17-3p, miR-543-5p, miR-3529-3p, miR-1, miR-4286, miR-181a-2-3p, miR-380-5p, miR-199a-5p, miR-1271-3p, miR-345-3p, miR-105-2, miR-128-3p, miR-10a-5p, miR-222, miR-483-3p, miR-2411-5p, miR-370-5p, miR-331-3p, miR-138-5p, miR-767-5p, miR-31-3p, miR-204-5p, miR-365a-5p, miR-2448-3p, miR-320a, miR-18a, miR-3074-1-3p, miR-23a-5p, miR-671-5p, miR-485-5p, miR-370-3p, miR-141-3p, miR-34c-5p, miR-365a-3p, miR-199a-5p, miR-151b-5p, miR-131-5p, miR-505, miR-29b-1-5p, miR-4726-5p, miR-185-5p

CHFR ENSOARGO(C checkpoint) 5p, miR-219a-2-3p, miR-371b-3p, miR-17-3p, miR-2447, novel\_1, miR-2440, miR-669, miR-677, miR-181b-3p, miR-323a-5p, miR-2483-3p, miR-489, miR-26b-5p, novel\_68, miR-3064-5p, miR-452-3p, miR-2319a, miR-493-5p, miR-146b-5p, miR-129b-5p, miR-381-3p, miR-18b, miR-2387, miR-2310, miR-380-5p, miR-494-3p, miR-493-5p, miR-146b, miR-3085-3p, miR-2957, miR-146a, miR-181b-2-3p, miR-409b, miR-219a-1-3p, miR-197-3p, miR-3071-5p, miR-6525, miR-592, miR-17-3p, miR-6740-5p, miR-219b-3p, miR-204-3p, miR-6516, miR-582-5p, miR-365a-3p, miR-323-5p, miR-3068-3p, miR-186-5p, novel\_99, miR-582-5p, miR-18a-5p, miR-2318, miR-18a, miR-433-3p, miR-2448-3p, miR-2424, miR-146a-5p, miR-143-3p, miR-380-5p, miR-181b-1-3p, miR-195a-3p, miR-3064-5p, miR-181a-2-3p, miR-216c-5p, miR-450a-2-3p, miR-17-3p, miR-2898, miR-30f, miR-2285af, miR-205-5p, miR-26a-5p, miR-219-3p, miR-532-3p, miR-616-3p, novel\_121, miR-6516-5p, miR-222-5p, miR-18b-5p, miR-142-3p, miR-2427

F11R ENSOARGO(C F11 receptor) 5p, miR-219a-2-3p, miR-371b-3p, miR-17-3p, miR-2447, novel\_1, miR-2440, miR-669, miR-677, miR-181b-3p, miR-323a-5p, miR-2483-3p, miR-489, miR-26b-5p, novel\_68, miR-3064-5p, miR-452-3p, miR-2319a, miR-493-5p, miR-146b-5p, miR-129b-5p, miR-381-3p, miR-18b, miR-2387, miR-2310, miR-380-5p, miR-494-3p, miR-493-5p, miR-146b, miR-3085-3p, miR-2957, miR-146a, miR-181b-2-3p, miR-409b, miR-219a-1-3p, miR-197-3p, miR-3071-5p, miR-6525, miR-592, miR-17-3p, miR-6740-5p, miR-219b-3p, miR-204-3p, miR-6516, miR-582-5p, miR-365a-3p, miR-323-5p, miR-3068-3p, miR-186-5p, novel\_99, miR-582-5p, miR-18a-5p, miR-2318, miR-18a, miR-433-3p, miR-2448-3p, miR-2424, miR-146a-5p, miR-143-3p, miR-380-5p, miR-181b-1-3p, miR-195a-3p, miR-3064-5p, miR-181a-2-3p, miR-216c-5p, miR-450a-2-3p, miR-17-3p, miR-2898, miR-30f, miR-2285af, miR-205-5p, miR-26a-5p, miR-219-3p, miR-532-3p, miR-616-3p, novel\_121, miR-6516-5p, miR-222-5p, miR-18b-5p, miR-142-3p, miR-2427

GABRA5 ENSOARGO(C gamma-aminobutyric acid receptor) 5p, miR-219a-2-3p, miR-371b-3p, miR-17-3p, miR-2447, novel\_1, miR-2440, miR-669, miR-677, miR-181b-3p, miR-323a-5p, miR-2483-3p, miR-489, miR-26b-5p, novel\_68, miR-3064-5p, miR-452-3p, miR-2319a, miR-493-5p, miR-146b-5p, miR-129b-5p, miR-381-3p, miR-18b, miR-2387, miR-2310, miR-380-5p, miR-494-3p, miR-493-5p, miR-146b, miR-3085-3p, miR-2957, miR-146a, miR-181b-2-3p, miR-409b, miR-219a-1-3p, miR-197-3p, miR-3071-5p, miR-6525, miR-592, miR-17-3p, miR-6740-5p, miR-219b-3p, miR-204-3p, miR-6516, miR-582-5p, miR-365a-3p, miR-323-5p, miR-3068-3p, miR-186-5p, novel\_99, miR-582-5p, miR-18a-5p, miR-2318, miR-18a, miR-433-3p, miR-2448-3p, miR-2424, miR-146a-5p, miR-143-3p, miR-380-5p, miR-181b-1-3p, miR-195a-3p, miR-3064-5p, miR-181a-2-3p, miR-216c-5p, miR-450a-2-3p, miR-17-3p, miR-2898, miR-30f, miR-2285af, miR-205-5p, miR-26a-5p, miR-219-3p, miR-532-3p, miR-616-3p, novel\_121, miR-6516-5p, miR-222-5p, miR-18b-5p, miR-142-3p, miR-2427

miR-2284s, miR-499b-3p, miR-6130, miR-532-5p, miR-378a-3p, miR-140-5p, miR-221-5p, miR-548o-3p, miR-133b-3p, miR-2285c, miR-181c-5p, miR-6525, miR-346, miR-3074-2-3p, miR-378c, miR-4510, miR-874-5p, miR-129-5p, miR-664a, miR-324-3p, miR-30a-3p, miR-222-3p, miR-30e-3p, miR-1247-5p, miR-2284h-5p, miR-200b, miR-30d-3p, miR-18a-3p, miR-106a, miR-133a-3p, miR-148a-5p, miR-493-3p, miR-124-3p, miR-378a-3p, miR-378i, miR-193b-5p, miR-376a-5p, miR-20a, miR-2285w, miR-221-5p, miR-106a, miR-324-3p, miR-422a, miR-125b, miR-196a-3p, novel\_17, miR-499a-3p, miR-378e, miR-3082-5p, miR-541-5p, miR-4792, miR-24-1-5p, miR-335-3p, miR-544-5p, miR-140-5p, miR-221, miR-8095, miR-877-3p, novel\_111, miR-9-5p, miR-194b-5p, miR-3059-5p, novel\_60, miR-885-5p, miR-3956-3p, miR-2284q, miR-148b-5p, miR-221-3p, miR-2285e, miR-222-5p, miR-145b, miR-3120-5p, miR-378c, miR-758-3p, miR-378b, miR-758-3p, miR-378d, miR-124a, miR-106a-5p, miR-505, miR-106b-5p, miR-370-3p, miR-141-3p, miR-125a, miR-20b-5p, miR-485-5p, miR-93-5p, miR-17-5p, miR-365a-5p, miR-378c, miR-93, miR-133a-3p, miR-134-5p, miR-125b-5p, miR-6740-5p, miR-134-5p, miR-214-5p, miR-9-5p, miR-378h, miR-222, miR-429-3p, miR-200b-3p, miR-218-2-3p, miR-134, miR-490-3p, miR-1271-3p, miR-24-2-5p, miR-30a-3p, miR-181a-2-3p, miR-200a-3p, novel\_127, miR-450a-2-3p, miR-200c-3p, miR-181b-5p, miR-200c, miR-9851-3p, miR-378f, miR-18a-3p, miR-3959-3p, miR-4324, miR-20a-5p, miR-133a-5p, miR-20b, miR-2285g, miR-412-5p, miR-665, miR-31-5p, miR-2889, miR-455-5p, miR-194-5p, novel\_23, miR-145a-5p, miR-181a-5p, miR-7b-5p, miR-125a-5p, miR-365b-5p, miR-194a, miR-106a-5p, miR-17-5p, miR-455-5p, miR-7-5p

miR-31-5p, miR-103a-3p, miR-411-5p, miR-708-3p, miR-431-3p, miR-4508, miR-668-3p, miR-628-5p, miR-377-3p, miR-365b-5p, novel\_51, miR-106b-3p, miR-3074-5p, miR-411b-3p, novel\_69, miR-374c-3p, miR-6535, miR-216a-3p, miR-2284e, miR-412-3p, let-7e-5p, miR-378f, miR-2284w, miR-199b-5p, miR-4324, miR-576-3p, miR-2284o, miR-6517, miR-412, miR-1224-5p, miR-505-5p, miR-134-5p, miR-2284z, miR-1343-5p, miR-3064-5p, miR-2284f, let-7g, miR-125a-3p, miR-664-3p, let-7f-5p, novel\_96, novel\_127, miR-503-3p, miR-874-3p, miR-2355-5p, miR-3956, miR-424-3p, miR-93-5p, miR-345-5p, miR-20b-5p, novel\_42, miR-28a-3p, miR-2284v, miR-1197-3p, miR-2433, miR-134-5p, novel\_78, miR-145b, miR-147a, miR-1298-3p, miR-126a-5p, miR-2459, miR-301b-5p, miR-758-3p, miR-1388-5p, miR-1388-3p, miR-124a, miR-676-3p, miR-378d, miR-29b-1-5p, miR-106b-5p, miR-491-5p, miR-199b-5p, miR-214-3p, miR-126b-5p, miR-3596, miR-652-3p, miR-203-3p, miR-96-5p, miR-99b-5p, miR-1983, miR-6527, miR-361-3p, miR-877-3p, miR-301a-5p, miR-628-3p, miR-154-3p, miR-18a-3p, miR-106a, miR-23c, miR-378i, miR-1961, miR-378a-3p, miR-664-5p, miR-487a, miR-369-3p, miR-345-3p, miR-486-3p, miR-143-3p, novel\_17, miR-210-5p, miR-422a, miR-98-5p, let-7k, miR-2331-3p, miR-154a-3p, miR-377-3p, miR-2284s, let-7i-5p, miR-2285c, miR-129b-3p, miR-433-3p, miR-345-5p, miR-543-3p, miR-625-5p, miR-1827, let-7b, miR-433-5p, miR-3074-5p, miR-665-5p, miR-214, miR-6525, miR-346, miR-224-5p, let-7f, miR-665, miR-4492, miR-874-5p, miR-130b-5p, miR-133b-5p, miR-2284d, miR-2285g, miR-185-5p, let-7g-5p, miR-103, miR-2355-3p, miR-20b, miR-145a-5p, miR-3071-5p, miR-138, miR-30b-3p, miR-2284ab, miR-219a-1-3p, miR-744-5p, miR-455-5p, miR-130b-5p, miR-345-5p, miR-224-5p, miR-197-5p, miR-99a-5p, miR-106a-5p, miR-17-5p, miR-455-5p, miR-1343-5p, miR-378h, miR-323a-5p, miR-2287, miR-18a-3p, miR-378h, miR-

miR-181b-1-3p, miR-130a-5p, miR-450b-5p, miR-376b-5p, miR-200a, miR-376c-5p, miR-29b-2-5p, miR-20a, miR-191-3p, miR-106a, miR-200a-3p, miR-299-3p, miR-152-3p, miR-125a-3p, miR-345-3p, miR-185-3p, miR-217, miR-339a, miR-324-3p, miR-216a-5p, miR-758-5p, miR-148b-3p, miR-6516-5p, miR-450a-1-3p, miR-545-5p, miR-106a, miR-299a-3p, miR-30d-3p, miR-212-5p, miR-505-3p, miR-7641, novel\_79, miR-300, miR-10a-5p, miR-345-3p, miR-217-5p, miR-1434-5p, miR-93, miR-10b-5p, miR-145-3p, miR-3074-5p, miR-3074-2-3p, miR-450b-3p, miR-454-3p, miR-29b-2-5p, miR-100-3p, miR-144, miR-139-5p, miR-6516, miR-10a, miR-301a-3p, miR-582-5p, miR-133c, miR-548o-3p, miR-141-3p, miR-345-5p, miR-339b, miR-345-5p, let-7g-3p, miR-582-5p, miR-20b-5p, miR-376c-5p, miR-450a-1-3p, miR-2285c, miR-381-3p, miR-376c-5p, miR-17-5p, miR-93-5p, miR-345-5p, miR-8485, miR-3187-3p, miR-106a-5p, let-7c-3p, miR-101-5p, miR-130b-3p, miR-466f-3p, miR-106b-5p, miR-17-5p, miR-106a-5p, miR-2411-3p, miR-105-5p, miR-2285g, miR-421, miR-1185-3p, miR-2459, miR-2285e, miR-20b, miR-216a-3p, miR-133b-5p, miR-548w, miR-122-3p, miR-181b-2-3p, miR-130a-3p, miR-339-5p, miR-101a-5p, miR-2284x, miR-10b, miR-2284r, miR-708-3p, miR-450c-3p, miR-361-3p, miR-301b-3p, miR-3956-3p, novel\_60, miR-495-3p, miR-628-3p, miR-20a-5p, novel\_82, miR-2285n, novel\_69, miR-299b-3p, miR-1185-2-3p, miR-181b-3p, miR-144-3p, miR-677, miR-3074-5p, miR-139-5p, miR-3120-3p, miR-10a-5p, miR-655-5p, miR-450b-3p, miR-877-3p, miR-505-3p, miR-148a-3p, miR-376b-5p, miR-381-3p, miR-150-5p

miR-16-1-3p, miR-133a-3p, let-7a-3p, miR-34a-5p, novel\_73, miR-2904, miR-98-3p, miR-1197-5p, miR-188-3p, miR-1193, miR-5703, miR-30c-5p, miR-362-3p, miR-2300b-3p, miR-2366, miR-193b-5p, miR-2284h-5p, miR-616-3p, miR-383-5p, miR-487a-3p, miR-7859, miR-212-5p, miR-548e-3p, miR-18a-3p, miR-106a, miR-34b-5p, miR-30d, miR-1277-5p, miR-106a, miR-500a-5p, miR-216a-5p, miR-345-3p, miR-30b, miR-618, miR-486-3p, miR-181b-1-3p, miR-20a, miR-345-3p, miR-216c-5p, miR-183-5p, miR-543-3p, novel\_99, miR-133b-3p, miR-30f, miR-345-5p, miR-129b-3p, miR-30d-5p, let-7f-1-3p, miR-132-5p, miR-27a-5p, miR-6516, miR-3065-3p, miR-296-3p, miR-532-5p, miR-30c-1-3p, miR-140-5p, miR-545-3p, miR-450b-3p, miR-664a, miR-6516-3p, miR-19b-1-5p, miR-132-5p, miR-338-5p, miR-665, miR-15b-3p, let-7b-3p, miR-224-5p, miR-98-3p, miR-129-2-3p, miR-3120-5p, miR-362-3p, miR-450b-5p, miR-2426, miR-2284r, miR-329-3p, miR-153, miR-376b-3p, miR-181b-2-3p, miR-105-1, novel\_4, miR-1343-3p, miR-153-3p, miR-103a-2-5p, miR-362-3p, miR-505, miR-106b-5p, miR-326, miR-193a, miR-8485, miR-1b-5p, miR-2310, miR-30c-1-3p, miR-33a-5p, miR-106a-5p, miR-494-3p, miR-376a-3p, miR-381-3p, miR-361-3p, miR-454-5p, miR-25, miR-2483-3p, miR-489, miR-7689-3p, miR-490-5p, miR-2284q, miR-628-3p, miR-107-5p, miR-30b-5p, miR-2440, miR-1285-5p, miR-877-3p, miR-361-3p, miR-3059-5p, miR-30c, miR-29d-3p, miR-2427, miR-30a-5p, miR-330-5p, miR-345-3p, miR-3578, miR-450a-1-3p, miR-545-5p, miR-129-1-3p, miR-758-5p, miR-6516-5p, miR-1224-5p, novel\_127, miR-200a-3p, miR-30c-2-3p, miR-205-5p, miR-2285af, miR-376b-3p, novel\_39, miR-3065-3p, miR-29a-5p, miR-2478, miR-4286, miR-181a-2-3p, miR-7144-5p, miR-20b-5p, miR-1248, miR-485-5p, miR-1814c, miR-767, miR-329a, miR-345-5p, miR-93-5p, miR-17-5p, miR-30e-5p, miR-488-3p, miR-301, miR-154b-5p, miR-3957, miR-34c-5p, miR-370-3p, miR-876-3p, miR-541, miR-182-5p, miR-2285b, miR-2284h-5p, novel\_32, miR-452-3p, miR-3956-3p, miR-541-3p, novel\_60, miR-552-3p, miR-182-5p

LYPD6

ENSOARGO(LY6/PLAU)

UBAP1

ENSOARGO(ubiquitin)

miR-16-5p, miR-2284v, miR-125b-5p, miR-2433, miR-2284k, miR-125a, miR-2285aa, miR-300-3p, miR-137-3p, miR-93-5p, miR-1248, miR-20b-5p, miR-2318, miR-345-5p, miR-876-3p, novel\_39, miR-29a-5p, miR-148b-5p, miR-200a-3p, novel\_127, novel\_79, miR-2285ad, novel\_121, miR-2284z, miR-450a-1-3p, miR-505-5p, miR-322-5p, miR-330-5p, miR-1290, miR-30c, miR-335-5p, miR-28c, miR-181b-3p, miR-677, miR-216a-3p, miR-2319a, miR-6240, miR-493-5p, miR-2284l, miR-432-3p, miR-432-3p, miR-2285r, novel\_51, miR-2411-3p, miR-7-5p, miR-339-5p, miR-103a-3p, miR-3955-5p, miR-31-5p, miR-194-3p, miR-149-5p, miR-3431, miR-412-5p, novel\_23, miR-450c-3p, miR-197-3p, miR-7b-5p, miR-19b-2-5p, miR-188-5p, miR-4508, miR-497-5p, miR-16-1-3p, miR-16b, miR-214, miR-346, miR-665, miR-664a-5p, miR-30a-3p, miR-30e-3p, miR-500, miR-4492, miR-454-3p, novel\_74, miR-296-3p, miR-30c-1-3p, miR-504-5p, miR-15b-5p, miR-216b-5p, miR-10a, miR-30d-5p, miR-598-3p, miR-500a-3p, miR-129b-3p, miR-450a-1-3p, miR-339b, miR-345-5p, miR-2285w, miR-143-3p, miR-486-3p, miR-377-5p, miR-181b-1-3p, miR-345-3p, miR-92a-1-5p, miR-219b-5p, miR-210-5p, miR-30b, miR-212-5p, miR-30d-3p, miR-106a, miR-18a-3p, miR-1247-5p, miR-2284h-5p, miR-7859, miR-2366, miR-30c-5p, miR-16-1-3p, miR-2447, miR-877-3p, miR-2440, miR-3968, miR-2319b, miR-203-3p, miR-499a-3p, miR-335-3p, miR-493-5p, miR-504, miR-1388-3p, miR-8485, miR-106b-5p, miR-16b, miR-214-3p, miR-130b-3p, miR-487b-5p, miR-181b-2-3p, miR-330-3p, miR-455-3p, miR-758-3p, miR-541, miR-1388-5p, miR-1306-5p, miR-374a-3p, miR-93, miR-3969, miR-331-3p, miR-2332, miR-34c-3p, miR-486b-3p, miR-141-3p, miR-370-3p, miR-598-3p, miR-17-5p, miR-3154, miR-488-3p, miR-671-5p, miR-7144-5p, miR-4286, miR-30a-3p, miR-2385-3p, miR-28b, miR-339a, miR-30c-2-3p, miR-543-5p, miR-107, miR-17-3p, miR-214-5p, miR-582-3p, miR-6516-



miR-487a, miR-92a-1-5p, miR-125b, miR-422a, miR-34b-3p, miR-500a-5p, miR-324-3p, miR-216a-5p, miR-26a-5p, miR-299-3p, miR-21-3p, miR-760-3p, miR-485-3p, miR-616-3p, miR-15a-5p, miR-148b-3p, miR-487a-3p, miR-1197-5p, miR-1193, miR-378a-3p, miR-5703, miR-140-3p, miR-1246, miR-2300b-3p, miR-378i, miR-378d, miR-214, miR-665-5p, miR-378c, miR-338-3p, miR-6134, miR-3184-5p, miR-769-5p, miR-665, miR-324-3p, miR-15b-3p, miR-424-5p, miR-4492, miR-664a, miR-450b-3p, miR-296-3p, miR-552-3p, miR-154a-3p, miR-496-3p, miR-378a-3p, miR-30c-1-3p, miR-877-5p, miR-15b-5p, miR-22-3p, novel\_32, miR-204-3p, miR-216b-5p, miR-450a-1-3p, miR-2285c, miR-186-5p, miR-154b-3p, let-7g-3p, miR-33a-5p, let-7c-3p, miR-424-5p, miR-1839-3p, miR-2330-5p, miR-8485, miR-30c-1-3p, miR-378d, miR-16b, miR-505, miR-326, novel\_103, miR-214-3p, miR-153-3p, miR-2300a-5p, miR-2285e, miR-9788-3p, miR-500-5p, miR-153, miR-301b-5p, miR-378b, miR-484, miR-296-5p, miR-1388-5p, miR-378c, miR-219a-5p, miR-3059-5p, miR-2447, miR-423-5p, novel\_111, miR-877-3p, miR-362-5p, miR-361-3p, miR-301a-5p, miR-769-5p, miR-371a-5p, miR-154-3p, miR-490-5p, miR-2285t, miR-499a-5p, miR-211-5p, miR-7977, miR-10b, miR-664b, miR-454-5p, miR-378e, miR-378g, miR-361-3p, novel\_94, miR-30c-2-3p, miR-125a-3p, miR-664-3p, miR-1260a, miR-152-3p, miR-1224-5p, miR-299a-3p, miR-450a-1-3p, miR-378h, miR-24-2-5p, miR-322-5p, miR-330-5p, miR-29d-3p, miR-218-2-3p, miR-345-3p, let-7a-2-3p, miR-496, miR-193a-5p, miR-16-5p, miR-378c, miR-1197-3p, miR-1260b, miR-500b-5p, miR-331-3p, miR-125b-5p, miR-29b-3p, miR-204-5p, miR-125a, miR-370-3p, miR-503-3p, miR-487a-3p, miR-3965, miR-365a-3p, miR-769, miR-362-5p, miR-485-5p, let-7g-3p, miR-876-3p, let-7a-2-3p, miR-539-3p, miR-432-3p, miR-654-3p, novel\_51, miR-455-5p, miR-2411-3p, miR-197-5p, miR-125a-5p, miR-149-5p, novel\_116, miR-134-3p, miR-2285g, miR-450c-3p, miR-32, novel\_23, miR-92a-3p, miR-92a-3p, miR-363, miR-4792, miR-32-5p, miR-2447, miR-363-3p, miR-204-3p, miR-92b-3p, miR-6525, miR-25-3p

TMEM86A ENSOARGO0 transmem 378b, miR-484, miR-296-5p, miR-1388-5p, miR-378c, miR-219a-5p, miR-3059-5p, miR-2447, miR-423-5p, novel\_111, miR-877-3p, miR-362-5p, miR-361-3p, miR-301a-5p, miR-769-5p, miR-371a-5p, miR-154-3p, miR-490-5p, miR-2285t, miR-499a-5p, miR-211-5p, miR-7977, miR-10b, miR-664b, miR-454-5p, miR-378e, miR-378g, miR-361-3p, novel\_94, miR-30c-2-3p, miR-125a-3p, miR-664-3p, miR-1260a, miR-152-3p, miR-1224-5p, miR-299a-3p, miR-450a-1-3p, miR-378h, miR-24-2-5p, miR-322-5p, miR-330-5p, miR-29d-3p, miR-218-2-3p, miR-345-3p, let-7a-2-3p, miR-496, miR-193a-5p, miR-16-5p, miR-378c, miR-1197-3p, miR-1260b, miR-500b-5p, miR-331-3p, miR-125b-5p, miR-29b-3p, miR-204-5p, miR-125a, miR-370-3p, miR-503-3p, miR-487a-3p, miR-3965, miR-365a-3p, miR-769, miR-362-5p, miR-485-5p, let-7g-3p, miR-876-3p, let-7a-2-3p, miR-539-3p, miR-432-3p, miR-654-3p, novel\_51, miR-455-5p, miR-2411-3p, miR-197-5p, miR-125a-5p, miR-149-5p, novel\_116, miR-134-3p, miR-2285g, miR-450c-3p, miR-32, novel\_23, miR-92a-3p, miR-92a-3p, miR-363, miR-4792, miR-32-5p, miR-2447, miR-363-3p, miR-204-3p, miR-92b-3p, miR-6525, miR-25-3p

DKK3 ENSOARGO0 dickkopf 4792, miR-32-5p, miR-2447, miR-363-3p, miR-204-3p, miR-92b-3p, miR-6525, miR-25-3p

miR-134, miR-3578, miR-345-3p, miR-330-5p, miR-582-3p, miR-155-5p, miR-200b-3p, miR-429-3p, miR-299a-3p, miR-2285ad, miR-9-5p, miR-24-2-5p, miR-322-5p, miR-505-5p, miR-302a-5p, novel\_121, miR-486-5p, miR-214-5p, miR-134-5p, miR-2284z, miR-450a-1-3p, miR-200c, miR-125a-3p, miR-376b-3p, miR-2285af, miR-200c-3p, miR-152-3p, miR-3529-3p, miR-181a-2-3p, miR-3064-5p, miR-29b-2-5p, miR-380-5p, miR-490-3p, miR-200a, novel\_39, miR-2448-3p, miR-320a, miR-3154, miR-345-5p, miR-7144-5p, miR-125a, miR-331-5p, miR-34c-5p, miR-374c-3p, miR-133c, miR-2284k, miR-410-5p, miR-409-3p, miR-125b-5p, miR-331-3p, miR-6740-5p, miR-134-5p, miR-486b-3p, miR-204-5p, miR-144-5p, miR-3607-3p, miR-16-5p, miR-1197-3p, miR-323-3p, miR-7b-5p, miR-1285, miR-1434-3p, miR-1843b-5p, miR-653, novel\_23, miR-450c-3p, miR-22-3p, miR-16-1-3p, miR-16b, miR-30b-3p, miR-188-5p, miR-455-5p, miR-2284x, miR-497-5p, miR-31-5p, miR-3955-5p, miR-26b-3p, miR-3431, miR-146a, miR-7-5p, miR-2411-3p, miR-455-5p, miR-378a-5p, miR-125a-5p, miR-380-5p, miR-628-5p, miR-382, miR-432-3p, miR-432-3p, miR-345-5p, let-7j, miR-148a-3p, miR-2285ab, miR-3065-5p, miR-376b-3p, miR-6516-3p, miR-195a-5p, miR-146b-5p, miR-216b-3p, miR-3120-3p, miR-374c-3p, miR-299b-3p, miR-670-3p, miR-34b, miR-146b-3p, miR-181b-3p, miR-320c, miR-677, miR-15a, miR-34c, miR-16a, miR-502b, miR-203b-5p, miR-656-5p, miR-335-5p, miR-342-3p, miR-758-5p, miR-495-3p, miR-24-3p, miR-3959-3p, miR-211, miR-2428, miR-326-3p, novel\_27, miR-449a, miR-2300b-3p, novel\_133, miR-1197-5p, miR-5703, miR-140-3p, miR-4429, miR-378d, miR-34a-5p, miR-16-1-3p, miR-133a-3p, miR-380-5p, miR-200b, miR-148b-3p, miR-15a-5p, miR-199a-3p, miR-374a-5p, miR-2285p, miR-196a-3p, miR-125b, miR-345-3p, miR-185-3p, miR-2284m, miR-320d, miR-21-3p, miR-299-3p, miR-30b-3p, miR-34b-5p, miR-221-5p, miR-216c-5p, miR-181b-

miR-151a-3p, miR-548w, miR-9788-3p, miR-221-3p, miR-500-5p, miR-455-3p, miR-376b-3p, miR-125b-2-3p, miR-758-3p, miR-30b-3p, miR-296-5p, miR-4791, miR-541, miR-101c, miR-3120-5p, miR-2426, miR-544a, miR-23a-3p, let-7c-3p, miR-1388-3p, miR-1839-3p, miR-193a, miR-2310, miR-758-3p, miR-29b-1-5p, miR-182-5p, miR-199b-5p, miR-103a-2-5p, miR-211-5p, miR-139-5p, miR-2319b, miR-376d, miR-3596, miR-3082-5p, miR-361-3p, miR-221, miR-199b-5p, miR-376a-3p, miR-504, miR-136-5p, miR-190b-5p, miR-194b-5p, miR-2447, miR-3059-5p, miR-541-3p, miR-362-5p, miR-877-3p, miR-371a-5p, miR-769-5p, miR-107-5p, miR-2440, miR-101-3p, miR-2285t, miR-628-3p, miR-3958-3p, miR-3968, miR-3600, miR-18a-3p, miR-548e-3p, miR-1247-5p, miR-23b-3p, miR-200b, miR-23c, miR-2904, miR-1197-5p, miR-5703, miR-140-3p, miR-34a-5p, miR-142-3p, miR-33b-3p, miR-183-5p, miR-216c-5p, miR-2432, miR-376a-5p, miR-29b-1-5p, miR-377-5p, miR-125b, miR-92a-1-5p, miR-34b-5p, miR-21-3p, miR-202-5p, miR-296-3p, miR-182-5p, miR-504-5p, miR-548o-3p, novel\_32, miR-204-3p, novel\_25, miR-22-3p, miR-155-5p, miR-544-3p, miR-6130, miR-139-5p, miR-500a-3p, miR-411, miR-450a-1-3p, miR-1827, novel\_99, let-7g-3p, miR-345-5p, miR-665-5p, miR-4510, miR-145a-3p, miR-3074-5p, miR-6134, miR-769-5p, miR-151-3p, miR-338-5p, miR-222-3p, miR-2285j, miR-500, miR-190a-5p, miR-130b-5p, miR-450b-3p, miR-155-5p, miR-665, miR-26b-3p, miR-377-5p, miR-31-5p, miR-3955-5p, miR-149-5p, miR-544b, miR-3535, miR-185-5p, miR-450c-3p, miR-22-3p, novel\_23, miR-3071-5p, miR-194-5p, miR-188-5p, miR-30b-3p, miR-219a-1-3p, miR-382, miR-380-5p, miR-130b-5p, miR-6412, let-7a-2-3p, miR-345-5p, miR-2285r, miR-654-3p, miR-190a, miR-194a, miR-125a-5p, miR-124-5p, miR-3074-5p, miR-6535, miR-34b, miR-670-3p, miR-150-5p, miR-18a-3p, miR-376b-5p, miR-376a-2-5p, miR-450b-3p, miR-183a-3p, novel\_120, miR-541-5p, miR-370-3p, miR-7977, miR-378g, miR-769, miR-203-3p, miR-677, miR-22-3p, miR-181b-3p, miR-93-5p, miR-3970, miR-17-5p, miR-410-5p, miR-345-5p, miR-345-5p, miR-20b-5p, miR-6516-3p, miR-539-5p, miR-3958-5p, miR-214, miR-769-5p, miR-93, miR-8095, miR-2284w, miR-2285j, miR-20a-5p, miR-100-3p, miR-769-5p, miR-664a-5p, miR-107-5p, miR-487a-5p, miR-106a, miR-181b-2-3p, miR-222-5p, miR-539-5p, miR-134-3p, miR-1298-3p, miR-199a-3p, miR-671-3p, miR-20b, miR-22-3p, miR-106a-5p, miR-20a, miR-345-3p, miR-376a-5p, miR-181b-1-3p, miR-345-5p, miR-199a-3p, miR-17-5p, miR-106b-5p, miR-106a-5p, miR-106a, miR-103a-2-5p, miR-214-3p

CLUL1 ENSOARGO(clusterin) miR-125b, miR-92a-1-5p, miR-34b-5p, miR-21-3p, miR-202-5p, miR-296-3p, miR-182-5p, miR-504-5p, miR-548o-3p, novel\_32, miR-204-3p, novel\_25, miR-22-3p, miR-155-5p, miR-544-3p, miR-6130, miR-139-5p, miR-500a-3p, miR-411, miR-450a-1-3p, miR-1827, novel\_99, let-7g-3p, miR-345-5p, miR-665-5p, miR-4510, miR-145a-3p, miR-3074-5p, miR-6134, miR-769-5p, miR-151-3p, miR-338-5p, miR-222-3p, miR-2285j, miR-500, miR-190a-5p, miR-130b-5p, miR-450b-3p, miR-155-5p, miR-665, miR-26b-3p, miR-377-5p, miR-31-5p, miR-3955-5p, miR-149-5p, miR-544b, miR-3535, miR-185-5p, miR-450c-3p, miR-22-3p, novel\_23, miR-3071-5p, miR-194-5p, miR-188-5p, miR-30b-3p, miR-219a-1-3p, miR-382, miR-380-5p, miR-130b-5p, miR-6412, let-7a-2-3p, miR-345-5p, miR-2285r, miR-654-3p, miR-190a, miR-194a, miR-125a-5p, miR-124-5p, miR-3074-5p, miR-6535, miR-34b, miR-670-3p, miR-150-5p, miR-18a-3p, miR-376b-5p, miR-376a-2-5p, miR-450b-3p, miR-183a-3p, novel\_120, miR-541-5p, miR-370-3p, miR-7977, miR-378g, miR-769, miR-203-3p, miR-677, miR-22-3p, miR-181b-3p, miR-93-5p, miR-3970, miR-17-5p, miR-410-5p, miR-345-5p, miR-345-5p, miR-20b-5p, miR-6516-3p, miR-539-5p, miR-3958-5p, miR-214, miR-769-5p, miR-93, miR-8095, miR-2284w, miR-2285j, miR-20a-5p, miR-100-3p, miR-769-5p, miR-664a-5p, miR-107-5p, miR-487a-5p, miR-106a, miR-181b-2-3p, miR-222-5p, miR-539-5p, miR-134-3p, miR-1298-3p, miR-199a-3p, miR-671-3p, miR-20b, miR-22-3p, miR-106a-5p, miR-20a, miR-345-3p, miR-376a-5p, miR-181b-1-3p, miR-345-5p, miR-199a-3p, miR-17-5p, miR-106b-5p, miR-106a-5p, miR-106a, miR-103a-2-5p, miR-214-3p

GLRX2 ENSOARGO(glutaredoxin) miR-125b, miR-92a-1-5p, miR-34b-5p, miR-21-3p, miR-202-5p, miR-296-3p, miR-182-5p, miR-504-5p, miR-548o-3p, novel\_32, miR-204-3p, novel\_25, miR-22-3p, miR-155-5p, miR-544-3p, miR-6130, miR-139-5p, miR-500a-3p, miR-411, miR-450a-1-3p, miR-1827, novel\_99, let-7g-3p, miR-345-5p, miR-665-5p, miR-4510, miR-145a-3p, miR-3074-5p, miR-6134, miR-769-5p, miR-151-3p, miR-338-5p, miR-222-3p, miR-2285j, miR-500, miR-190a-5p, miR-130b-5p, miR-450b-3p, miR-155-5p, miR-665, miR-26b-3p, miR-377-5p, miR-31-5p, miR-3955-5p, miR-149-5p, miR-544b, miR-3535, miR-185-5p, miR-450c-3p, miR-22-3p, novel\_23, miR-3071-5p, miR-194-5p, miR-188-5p, miR-30b-3p, miR-219a-1-3p, miR-382, miR-380-5p, miR-130b-5p, miR-6412, let-7a-2-3p, miR-345-5p, miR-2285r, miR-654-3p, miR-190a, miR-194a, miR-125a-5p, miR-124-5p, miR-3074-5p, miR-6535, miR-34b, miR-670-3p, miR-150-5p, miR-18a-3p, miR-376b-5p, miR-376a-2-5p, miR-450b-3p, miR-183a-3p, novel\_120, miR-541-5p, miR-370-3p, miR-7977, miR-378g, miR-769, miR-203-3p, miR-677, miR-22-3p, miR-181b-3p, miR-93-5p, miR-3970, miR-17-5p, miR-410-5p, miR-345-5p, miR-345-5p, miR-20b-5p, miR-6516-3p, miR-539-5p, miR-3958-5p, miR-214, miR-769-5p, miR-93, miR-8095, miR-2284w, miR-2285j, miR-20a-5p, miR-100-3p, miR-769-5p, miR-664a-5p, miR-107-5p, miR-487a-5p, miR-106a, miR-181b-2-3p, miR-222-5p, miR-539-5p, miR-134-3p, miR-1298-3p, miR-199a-3p, miR-671-3p, miR-20b, miR-22-3p, miR-106a-5p, miR-20a, miR-345-3p, miR-376a-5p, miR-181b-1-3p, miR-345-5p, miR-199a-3p, miR-17-5p, miR-106b-5p, miR-106a-5p, miR-106a, miR-103a-2-5p, miR-214-3p

miR-181c-5p, miR-652b, miR-769-5p, miR-665-5p, miR-378c, miR-539-5p, miR-708-5p, miR-4492, miR-129-5p, miR-6516-3p, miR-17-3p, miR-320e, miR-665, miR-2285j, novel\_32, novel\_25, miR-27a-5p, miR-182-5p, miR-370-5p, miR-21-3p, miR-660-5p, miR-140-5p, miR-378a-3p, miR-504-5p, miR-186-5p, miR-345-5p, miR-339b, let-7g-3p, miR-133b-3p, miR-21a-3p, miR-486-3p, miR-181b-1-3p, miR-376a-5p, miR-21-3p, miR-2284m, miR-345-3p, miR-125b, miR-422a, miR-324-3p, miR-199a-3p, miR-222-5p, miR-361-5p, miR-133a-3p, miR-4429, novel\_73, miR-5703, miR-378a-3p, miR-1193, miR-124-3p, miR-2300b-3p, miR-378i, miR-194b-5p, miR-181d-5p, miR-2284j, miR-9-5p, miR-3956-3p, novel\_60, miR-769-5p, miR-454-5p, miR-378g, miR-378e, miR-452-3p, miR-24-1-5p, miR-9-3p, novel\_94, miR-504, miR-129b-5p, miR-140-5p, miR-491-3p, miR-378d, let-7c-3p, miR-124a, miR-3955-3p, miR-182-5p, miR-323b-3p, novel\_115, miR-326, miR-320b, miR-199a-3p, miR-421, miR-9788-3p, miR-216a-3p, miR-147a, miR-496-5p, miR-181b-2-3p, novel\_4, miR-199b-3p, miR-548w, miR-1388-5p, miR-378c, miR-30b-3p, miR-323b, miR-378b, miR-378c, miR-323-3p, miR-133a-3p, miR-6128, miR-28-5p, miR-134-5p, miR-486b-3p, miR-135a-5p, miR-331-3p, miR-125b-5p, miR-6740-5p, miR-370-5p, miR-5100, miR-135a-1-3p, miR-2284k, miR-769, miR-125a, miR-2355-5p, miR-874-3p, miR-671-5p, miR-345-5p, miR-10b-3p, miR-320a, miR-3154, novel\_39, miR-24-2-5p, miR-4286, miR-543-5p, miR-181b-5p, miR-17-3p, miR-339a, miR-486-5p, miR-134-5p, miR-6516-5p, miR-378h, miR-9-5p, novel\_79, miR-330-5p, miR-134, miR-345-3p, miR-2428, miR-326-3p, miR-24-3p, miR-17-3p, novel\_101, miR-1193, miR-199c, miR-421-5p, miR-485-3p, miR-4324, miR-181b-3p, miR-677, miR-411b-3p, miR-378f, miR-135b-5p, miR-6516-3p, miR-376a-2-5p, miR-3591-3p, miR-345-5p, miR-432-3p, miR-122-3p, miR-628-5p, miR-668-3p, miR-125a-5p, miR-660, miR-124-let-7g-3p, miR-885-3p, miR-218-1-3p, miR-885-3p, miR-135b-5p, miR-223-3p, miR-137-3p, miR-500a-3p, miR-142-5p, miR-545-5p, miR-574-5p, miR-199b-3p, miR-329-5p, miR-3120-3p, miR-141-3p, miR-500, miR-200a-3p, miR-199c, miR-15b-3p, novel\_63, miR-218-5p, miR-576-3p, miR-135a-5p, miR-142a-5p, miR-329a-5p

PVRL2

ENSOARGO(poliovir

ATP1B1

ENSOARGO(ATPase,

miR-10a-5p, miR-128-3p, miR-300, miR-345-3p, miR-486-5p, miR-545-5p, miR-378h, miR-7641, miR-1224-5p, miR-423-3p, miR-299a-3p, novel\_96, miR-543-5p, miR-6536, miR-205-5p, miR-2285b, miR-200a, miR-29a-5p, miR-148b-5p, miR-30a-3p, miR-485-5p, miR-671-5p, miR-1248, miR-7144-5p, novel\_48, miR-20b-5p, miR-200a-5p, miR-93-5p, miR-424-3p, miR-488-3p, miR-381-3p, miR-324-5p, miR-331-5p, miR-1271, miR-99a-3p, miR-5100, miR-99b-3p, miR-378c, miR-365a-5p, miR-93, miR-6128, miR-374b, miR-455-5p, miR-27b-3p, miR-188-5p, miR-223-3p, miR-1434-3p, miR-544b, miR-2355-3p, miR-411-5p, miR-26b-3p, miR-133b-5p, miR-466f-3p, miR-660, miR-124-5p, miR-17-5p, miR-106a-5p, miR-455-5p, miR-2411-3p, miR-365b-5p, miR-224-5p, miR-654-3p, miR-6395, miR-378f, miR-410-5p, miR-216a-3p, miR-3065-5p, miR-3970, miR-150-5p, miR-2387, miR-181b-3p, miR-677, miR-299b-3p, miR-670-3p, miR-10a-5p, miR-26b-5p, miR-3120-3p, miR-655-5p, miR-425-5p, miR-20a-5p, miR-323c, miR-3959-3p, miR-495-3p, miR-148a-5p, miR-140-3p, miR-378a-3p, miR-1193, miR-2366, miR-378i, miR-328-3p, miR-7859, miR-548e-3p, miR-21-3p, miR-299-3p, miR-99a-3p, miR-422a, miR-345-3p, miR-500a-5p, miR-26a-5p, miR-125b-2-3p, miR-181b-1-3p, miR-345-3p, miR-20a, miR-1827, miR-186-5p, let-7g-3p, miR-433-3p, miR-21a-3p, miR-877-5p, miR-216b-5p, miR-10a, miR-544-3p, miR-548o-3p, miR-660-5p, miR-545-3p, miR-504-5p, miR-378a-3p, miR-129-5p, miR-3604, miR-30a-3p, miR-224-5p, miR-10b-5p, miR-665-5p, miR-3958-5p, miR-378c, miR-544a, miR-2426, miR-378c, miR-10b, miR-378b, miR-6529a, miR-148b-5p, miR-216a-3p, miR-153, miR-181b-2-3p, miR-27a-3p, novel\_78, miR-548w, miR-153-3p, miR-491-5p, miR-106b-5p, miR-2957, miR-1b-5p, miR-193a, miR-8485, miR-378d, miR-33a-5p, miR-744-3p, miR-652-5p, let-7c-3p, miR-494-3p, miR-106a-5p, miR-101b-3p, miR-877-3p, novel\_94, miR-504, miR-129b-5p, miR-27a-3p, miR-378a, miR-5703, miR-140-3p, miR-2366, miR-496, miR-218-1-3p, miR-212-5p, miR-30d-3p, novel\_79, miR-2285ad, miR-18a-3p, miR-214-5p, miR-339a, miR-664-3p, novel\_127, miR-181b-5p, miR-30a-3p, miR-2385-3p, miR-329a-5p, miR-1271-3p, miR-2285i, miR-450b-5p, miR-3154, miR-200a-5p, miR-500a-3p, miR-424-3p, miR-1827, miR-339b, miR-532-5p, miR-552-3p, miR-2355-5p, miR-496-3p, miR-503-3p, miR-223-5p, miR-30a-3p, miR-30e-3p, miR-204-5p, miR-592, miR-500, miR-129-5p, novel\_74, miR-425-5p, miR-3074-5p, miR-181c-5p, miR-194-5p, miR-181a-5p, miR-27b-3p, miR-1388-5p, miR-27a-3p, miR-339-5p, miR-548w, miR-185-5p, miR-194a, miR-493-5p, miR-1b-5p, miR-18a-3p, miR-378j, miR-361-3p, miR-493-5p, miR-335-3p, miR-2285k, miR-211-5p, miR-320b, miR-3074-5p, miR-452-3p, miR-329-5p, miR-664b, miR-27a-3p, miR-33a-3p, miR-2285y, miR-2285x, miR-194b-5p, miR-181d-5p, miR-211

FBXL5

ENSOARGO(F-box an

FABP12

ENSOARGO(fatty ac

miR-1291, miR-6395, miR-3141, miR-18b, miR-221, miR-361-3p, miR-489, miR-2404, miR-7857-3p, miR-7977, miR-199c, miR-101-3p, miR-615, miR-4324, miR-218-5p, miR-24-3p, miR-2428, miR-326-3p, miR-212-3p, miR-3956-3p, novel\_60, miR-30b-3p, miR-6529a, miR-873a-5p, miR-30b-3p, miR-185-5p, miR-425-3p, miR-221-3p, miR-2300a-5p, miR-199b-3p, miR-222-5p, miR-665, miR-125a-5p, miR-326, novel\_103, miR-199a-3p, miR-3141, miR-2330-5p, miR-101b-3p, miR-18a-5p, miR-329b, miR-582-5p, novel\_99, miR-1248, miR-186-5p, miR-1827, miR-485-5p, miR-18a, miR-6130, miR-132-5p, miR-151b, miR-223-5p, miR-125a, miR-2285aa, miR-2355-5p, miR-134-5p, miR-2433, miR-222-3p, miR-125b-5p, miR-6740-5p, miR-4510, miR-493-3p, miR-2300b-3p, miR-134, miR-1246, miR-2408, miR-615-3p, miR-330-5p, miR-23b-5p, miR-1193, miR-1434-5p, miR-505-5p, miR-328-3p, miR-582-3p, miR-671-3p, miR-199a-3p, miR-134-5p, miR-151-5p, miR-6517, miR-3960, miR-222, miR-18b-5p, miR-127-5p, miR-450a-2-3p, miR-2285af, miR-125b, novel\_39, miR-2403 miR-192-3p, novel\_39, miR-3064-5p, miR-760-3p, miR-466i-5p, miR-543-5p, miR-30b-3p, miR-8117, miR-422a, miR-125b, miR-185-3p, miR-92a-1-5p, miR-339a, miR-30c-2-3p, miR-378h, miR-328-3p, novel\_79, miR-378d, miR-133a-3p, miR-1246, miR-2366, miR-378i, miR-330-5p, miR-378a-3p, miR-501-3p, miR-124-3p, miR-2904, miR-346, miR-2903, miR-3184-5p, miR-378c, miR-378c, miR-193a-5p, miR-664a, miR-4492, miR-874-5p, miR-551b-3p, miR-320e, miR-665, miR-125b-5p, miR-331-3p, miR-216b-5p, miR-300-3p, miR-378a-3p, miR-30c-1-3p, miR-504-5p, miR-296-3p, miR-125a, miR-1271, miR-216b-3p, miR-345-5p, miR-345-5p, miR-339b, miR-1827, miR-1248, miR-485-5p, miR-23a-5p, miR-378d, miR-30c-1-3p, miR-345-5p, miR-193a, miR-4532, miR-6240, miR-124a, miR-3085-3p, miR-125a-5p, miR-326, miR-1306-5p, novel\_51, miR-330-3p, miR-3431, miR-134-3p, miR-1298-3p, miR-2459, miR-149-5p, miR-194-3p, miR-330-3p, miR-187-3p, miR-145b, miR-5010-3p, miR-339-5p, miR-219a-1-3p, miR-378c, miR-301b-5p, miR-296-5p, miR-378b, miR-2284r, miR-145a-5p, miR-7857, miR-501-3p, miR-24-3p, miR-361-3p, miR-877-3p, miR-2428, miR-502-3p, miR-326-3p, miR-423-5p, miR-3956-3p, miR-3059-5p, novel\_60, miR-4726-5p, miR-502b, miR-490-5p, novel\_82, miR-4324, miR-301a-5p, miR-378e, miR-378g, miR-4443, miR-500-3p, miR-677, miR-378b, miR-3064-5p, miR-7977, miR-320b, miR-504, miR-1291, miR-378f, miR-877-3p, miR-6395, miR-361-3p, miR-1306

TAPBP ENSOARGOC TAP bind

PLA2G2F ENSOARGOC phosphol

miR-29a, miR-502-5p, miR-211, miR-2284w, miR-199b-5p, miR-1839-3p, miR-29c-3p, miR-1291, miR-2319a, miR-6395, miR-378f, miR-376b-5p, miR-3141, miR-148a-3p, miR-2387, miR-21c, miR-3065-5p, miR-323a-5p, miR-29a-3p, miR-670-3p, miR-378b, miR-10a-5p, miR-3120-3p, miR-7-1-3p, miR-378a-5p, miR-1343-5p, miR-125a-5p, miR-224-5p, miR-296-3p, miR-3141, miR-654-3p, miR-2285r, miR-296-3p, miR-380-5p, miR-29b, miR-21-5p, miR-30b-3p, miR-1260b, miR-219a-1-3p, miR-2284x, miR-708-3p, miR-2113, miR-450c-3p, miR-3071-5p, miR-3535, miR-3431, novel\_116, miR-6238, miR-340-3p, miR-31-5p, miR-204-5p, novel\_63, miR-551b-3p, miR-29b-3p, miR-125b-5p, miR-331-3p, miR-500b-5p, miR-1197-3p, miR-1260b, miR-10b-3p, miR-378c, miR-28a-3p, miR-1306-5p, miR-181a-2-3p, miR-10b-3p, miR-329b, miR-376c-5p, miR-30e-5p, miR-2448-3p, miR-301, miR-362-5p, miR-376c-5p, miR-223-5p, miR-199a-5p, miR-503-3p, miR-ARHGAP30 ENSOARGO(Rho GTPa 125a, miR-615-5p, miR-450a-2-3p, miR-200c-3p, miR-152-3p, miR-543-5p, miR-205-5p, miR-1260a, miR-200c, miR-30c-2-3p, miR-380-5p, miR-199a-5p, miR-3529-3p, miR-30a-3p, miR-582-3p, miR-200b-3p, miR-10a-5p, miR-615-3p, miR-3591-5p, miR-1343-5p, miR-29d-3p, miR-30a-5p, miR-23b-5p, miR-758-5p, miR-378h, miR-450a-1-3p, miR-429-3p, miR-3958-3p, miR-2284q, miR-30b-5p, miR-615, miR-107-5p, miR-877-3p, miR-362-5p, miR-361-3p, novel\_111, miR-423-5p, miR-2447, miR-212-3p, miR-668-5p, miR-504, miR-140-5p, miR-199b-5p, miR-378e, miR-4443, miR-211-5p, miR-199b-5p, miR-103a-2-5p, novel\_19, miR-30c-1-3p, miR-378d, miR-2310, miR-758-3p, miR-1839-3p, miR-2330-5p, miR-376b, miR-33a-5p, miR-378c, miR-1388-5p, miR-2426, miR-378b, miR-6529a, miR-10b, miR-4791, miR-30b-3p, miR-758-3p, miR-500-5p, miR-455-3p, miR-2300a-5p, miR-1343-3p, miR-5010-3p, miR-450b-3p, miR-874-5p, miR-487a-5p, miR-30e-3p, miR-30a-3p, miR-300a, miR-10b-5p, miR-224-5p, miR-3184-AMOTL1 ENSOARGO(angiomot miR-421, miR-2424 miR-2284y, miR-2284a, miR-664b-3p, miR-214, miR-2284b, miR-2284j, miR-2284v, miR-3184-3p, miR-452-5p, miR-214-3p, miR-ATP2C1 ENSOARGO(ATPase, 2284m, novel\_87, miR-2284k, novel\_83, miR-2284n, miR-2284d, miR-2284g, miR-7975, miR-2284u, miR-148a-5p, miR-876-3p, miR-668-5p, miR-3071-5p miR-145a-3p, let-7a-2-3p, miR-301b-3p, miR-145-3p, novel\_96, miR-152-3p, miR-454-3p, miR-130b-3p, miR-379-3p, miR-155-5p, miR-491-5p, miR-30d-3p, miR-130a-3p, miR-TBCK ENSOARGO(TBC1 dom. 2319b, miR-155-5p, miR-148b-3p, miR-301a-3p, miR-1434-5p, miR-223-3p, miR-148a-3p, miR-2300b-3p, miR-3120-5p, miR-2319a, miR-155-5p, miR-1388-5p

miR-1271-5p, miR-322-5p, miR-431, miR-18b-5p, miR-7641, miR-6517, miR-299a-3p, novel\_127, novel\_96, miR-30c-2-3p, miR-2285af, miR-205-5p, miR-1260a, miR-3064-5p, miR-671-5p, miR-20b-5p, miR-345-5p, miR-876-3p, miR-10b-3p, miR-18a, miR-3154, miR-17-5p, miR-93-5p, miR-301, miR-34c-5p, miR-125a, miR-370-3p, miR-2355-5p, miR-874-3p, miR-574-5p, miR-125b-5p, miR-1260b, miR-93, miR-133a-3p, miR-16-5p, novel\_42, miR-4508, miR-497-5p, miR-1260b, miR-16b, miR-145a-5p, miR-2113, miR-873a-5p, miR-20b, miR-185-5p, miR-377-5p, miR-133b-5p, miR-125a-5p, miR-17-5p, novel\_51, miR-106a-5p, miR-345-5p, miR-432-3p, miR-195a-5p, miR-18a-3p, miR-378b, miR-150-5p, miR-18b, miR-6535, miR-669, miR-34b, miR-299b-3p, miR-329-5p, novel\_87, miR-16a, miR-34c, miR-20a-5p, miR-15a, miR-502-5p, miR-2284w, miR-449a, miR-24-3p, miR-378d, miR-34a-5p, miR-1193, miR-2366, miR-2284h-5p, miR-15a-5p, miR-7859, miR-106a, miR-548e-3p, miR-18a-3p, miR-299-3p, miR-34b-5p, miR-106a, miR-92a-1-5p, miR-125b, miR-185-3p, miR-324-3p, miR-216a-5p, novel\_17, miR-125b-2-3p, miR-377-5p, miR-376a-5p, miR-29b-1-5p, miR-345-3p, miR-20a, miR-2285w, miR-329a-5p, miR-345-5p, miR-18a-5p, miR-133b-3p, miR-15b-5p, miR-6130, miR-296-3p, miR-21-3p, miR-548o-3p, miR-30c-1-3p, miR-874-5p, miR-424-5p, miR-664a, miR-132-5p, miR-324-3p, miR-2285j, miR-338-3p, miR-6134, miR-122-5p, miR-2330-3p, miR-1271, miR-4510, miR-3184-3p, miR-3120-5p, miR-2426, miR-301b-5p, miR-541, miR-455-3p, miR-9788-3p, miR-145b, miR-491-5p, miR-3085-3p, miR-106b-5p, miR-16b, miR-29b-1-5p, miR-431-5p, miR-30c-1-3p, miR-106a-5p, miR-424-5p, miR-1388-3p, miR-96-5p, miR-2285u, miR-3064-5p, miR-2284q, miR-4726-5p, miR-301a-5p, miR-382-3p, miR-218-5p, miR-1285-5p, miR-541-3p



miR-362-3p, miR-329-3p, miR-541, miR-30b-3p, miR-1298-3p, miR-9788-3p, miR-216a-3p, miR-1343-3p, miR-330-3p, novel\_103, miR-1306-5p, miR-326, miR-362-3p, miR-29b-1-5p, miR-106b-5p, miR-30c-1-3p, miR-8485, miR-124a, miR-106a-5p, miR-504, miR-1983, miR-877-3p, miR-3596, miR-3958-3p, miR-2284q, novel\_82, miR-877-3p, miR-423-5p, miR-541-3p, miR-6527, miR-1296-5p, miR-194b-5p, miR-493-3p, miR-664-5p, miR-378d, novel\_133, miR-2300b-3p, miR-193b-5p, miR-362-3p, miR-124-3p, miR-2904, miR-1193, miR-151-5p, miR-106a, miR-106a, miR-221-5p, miR-216a-5p, miR-324-3p, miR-185-3p, miR-29b-1-5p, miR-486-3p, miR-2411, miR-143-3p, miR-20a, miR-339b, miR-1895, miR-1827, miR-433-3p, miR-377-3p, miR-151b, miR-30c-1-3p, miR-221-5p, miR-504-5p, miR-21-3p, miR-29b-2-5p, miR-665, miR-122-5p, miR-3184-5p, miR-129-2-3p, miR-665-5p, miR-3074-2-3p, miR-30b-3p, miR-4508, miR-2284x, miR-7b-5p, miR-194-5p, miR-412-5p, miR-194-3p, miR-20b, miR-339-5p, miR-1343-5p, miR-7-5p, miR-377-3p, miR-330-3p, miR-17-5p, miR-194a, miR-106a-5p, miR-432-3p, miR-6240, miR-412-3p, miR-9851-3p, miR-1306, miR-3591-3p, miR-216a-3p, miR-670-3p, miR-6535, miR-203b-5p, miR-6123, miR-502b, miR-502-5p, miR-20a-5p, miR-28c, miR-371b-3p, miR-326-3p, novel\_101, miR-128-3p, miR-3578, miR-1343-5p, miR-330-5p, miR-2411-5p, miR-129-1-3p, novel\_79, miR-30c-2-3p, miR-339a, miR-28b, miR-1271-3p, miR-29b-2-5p, miR-329a, miR-20b-5p, miR-301, miR-93-5p, miR-17-5p, miR-486b-3p, miR-551b-3p, miR-331-3p, miR-93, miR-1306-5p, miR-193a-5p, miR-22-3p, miR-412-3p, miR-197-3p, miR-30b-3p, miR-541, miR-30b-3p, miR-1388-5p, miR-2426, miR-2300a-5p, miR-133b-5p, miR-153, miR-3141, miR-146a, miR-431-5p, miR-153-3p, miR-146b, miR-2285o, miR-491-5p, miR-378a-5p, miR-2285l, miR-668-3p, miR-8485, let-7a-2-3p, miR-3141, miR-146b-5p, miR-877-3p, miR-3963, miR-4792, miR-6535, miR-4443, miR-323a-5p, miR-34b, miR-34c, miR-769-5p, miR-502b, miR-3968, miR-541-3p, miR-449a, miR-2428, miR-7705, miR-3959-3p, miR-5703, miR-193b-5p, miR-218-1-3p, let-7a-2-3p, miR-34a-5p, miR-412, miR-431, miR-212-5p, miR-2411-5p, miR-34b-5p, novel\_96, miR-5100, miR-4286, miR-2411, miR-146a-5p, miR-29a-5p, novel\_39, miR-2478, let-7g-3p, miR-21-3p, miR-2331-3p, miR-22-3p, novel\_32, miR-34c-5p, miR-323-5p, miR-769, miR-665, miR-320e, miR-4492, miR-769-5p, miR-6525

PLA2G2D ENSOARGO( phosphol

APOC4 ENSOARGO( apolipop

miR-664-5p, miR-33b-3p, miR-2904, miR-188-3p, miR-5703, miR-140-3p, miR-30c-5p, miR-215-5p, miR-2366, miR-376a-5p, miR-532-3p, novel\_83, miR-2284h-5p, miR-487a-3p, miR-148b-3p, miR-485-3p, miR-212-5p, miR-221-5p, miR-21-3p, miR-2284m, miR-466i-5p, miR-216a-5p, miR-345-3p, miR-30b, miR-2285p, miR-2424, miR-143-3p, miR-181b-1-3p, miR-183-5p, miR-329a-5p, miR-2285w, miR-105-3p, miR-625-5p, novel\_99, let-7g-3p, miR-133b-3p, miR-345-5p, miR-30f, miR-433-3p, miR-21a-3p, miR-450a-1-3p, miR-22-3p, miR-204-3p, miR-544-3p, miR-192-5p, miR-139-5p, miR-656-3p, miR-216b-3p, miR-221-5p, miR-548o-3p, miR-130b-5p, miR-450b-3p, miR-6516-3p, miR-17-3p, miR-324-3p, miR-3604, miR-2285j, miR-15b-3p, miR-206-3p, miR-2330-3p, miR-129-2-3p, miR-101c, miR-3120-5p, miR-544a, miR-412-3p, miR-1a-3p, miR-758-3p, miR-484, miR-6529a, miR-541, miR-4791, miR-301b-5p, miR-455-3p, miR-1185-3p, miR-153, miR-376b-3p, miR-222-5p, miR-181b-2-3p, miR-330-3p, novel\_78, miR-2300a-5p, miR-409b, miR-153-3p, miR-2285o, miR-103a-2-5p, miR-3955-3p, miR-2957, miR-505, miR-326, miR-4532, miR-758-3p, miR-491-3p, miR-2310, miR-652-5p, miR-33a-5p, miR-376a-3p, miR-136-5p, miR-668-5p, miR-361-3p, miR-203-3p, miR-1185-2-3p, miR-376d, miR-3596, miR-25, miR-3082-5p, miR-2285u, miR-126b-5p, miR-139-5p, miR-452-3p, miR-499a-5p, miR-3968, miR-2285y, miR-301a-5p, miR-107-5p, miR-2285n, miR-30b-5p, miR-1285-5p, miR-9-5p, miR-452-5p, miR-2447, novel\_60, miR-3059-5p, miR-541-3p, miR-3956-3p, miR-30c, miR-29d-3p, miR-1343-5p, miR-23b-5p, miR-330-5p, miR-345-3p, miR-1290, miR-3578, miR-450a-1-3p, miR-129-1-3p, miR-486-5p, miR-9-5p, miR-412, miR-2285ad, miR-152-3p, miR-17-3p, miR-376b-3p, miR-1957a, miR-2285b, miR-490-3p, miR-192-3p, miR-28b, miR-2385-3p, miR-1, miR-181a-2-3p, miR-3529-3p, miR-671-5p, miR-181a, miR-767, miR-320b, miR-345-5p, miR-137-3p, miR-374c, miR-7144-5p, miR-582-5p, miR-320b, miR-21-3p, miR-7977, miR-544-3p, miR-582-5p, miR-378g, miR-324-5p, miR-154b-5p, miR-101-3p, miR-499a-5p, miR-4492, miR-486b-3p, miR-541-3p, miR-129-2-3p, miR-361-3p, miR-346, miR-2284w, miR-432, miR-541, miR-544a, miR-219a-1-3p, miR-101c, miR-4508, miR-744-5p, miR-432-5p, miR-134-3p, miR-671-3p, miR-544b, miR-129-1-3p, miR-296-3p, novel\_19, miR-2898, miR-452-5p, miR-101b-3p, miR-486-3p, miR-296-3p, miR-877-5p, miR-2284h-5p, miR-200a, miR-3082-5p, miR-141-3p, miR-125a, miR-493-5p, miR-2285w, miR-200a-3p, miR-493-5p, miR-125a-5p, miR-219a-1-3p, miR-125b, miR-125b-5p, miR-30f

GXYLT2 ENSOARGO(glucosid

HDHD1 ENSOARGO(haloacid

MPHOSPH6 ENSOARGO(M-phase

miR-194b-5p, miR-2447, miR-502-3p, miR-423-5p, miR-371a-5p, miR-30b-5p, miR-374a-3p, miR-3964, miR-628-3p, miR-335, miR-24-1-5p, miR-452-3p, miR-144-5p, miR-27a-3p, miR-500-3p, miR-1185-2-3p, miR-7857-3p, miR-378e, miR-2483-3p, miR-378j, miR-140-5p, miR-1983, miR-744-3p, miR-124a, miR-424-5p, miR-193a, miR-1b-5p, miR-378d, miR-16b, miR-320b, miR-326, miR-27a-3p, miR-181b-2-3p, miR-501-3p, miR-412-3p, miR-296-5p, miR-378b, miR-16-2-3p, miR-378c, miR-3074-2-3p, miR-378c, miR-3074-5p, miR-122-5p, miR-3184-5p, miR-338-5p, miR-3604, miR-29b-2-5p, miR-4492, miR-874-5p, miR-424-5p, miR-370-5p, miR-296-3p, miR-378a-3p, miR-548o-3p, miR-22-3p, miR-204-3p, miR-15b-5p, miR-192-5p, miR-582-5p, miR-129b-3p, miR-30d-5p, miR-3613-5p, novel\_99, miR-1827, miR-582-5p, let-7g-3p, miR-154b-3p, miR-30f, miR-329a-5p, miR-181b-1-3p, miR-422a, miR-196a-3p, miR-30b, miR-30d, miR-30b-3p, miR-2484, miR-320d, miR-3600, miR-505-3p, miR-548e-3p, miR-7859, miR-200b, miR-15a-5p, miR-124-3p, miR-378a-3p, miR-1197-5p, miR-5703, miR-217-5p, miR-30c-5p, miR-378i, miR-215-5p, miR-218-1-3p, miR-4429, miR-495-3p, miR-1193, miR-2285x, miR-135a-2-3p, miR-335-5p, miR-326-3p, miR-2284w, miR-3959-3p, miR-16a, miR-15a, miR-3613, miR-28c, miR-6402, miR-502b, miR-320b, miR-7-1-3p, miR-3074-5p, miR-329-5p, miR-320c, miR-181b-3p, miR-670-3p, miR-3970, miR-216a-3p, miR-195a-5p, miR-505-3p, miR-135b-5p, miR-378f, miR-450b-3p, miR-412-3p, miR-107, miR-2483-5p, let-7f-2-3p, let-7f-2-3p, let-7a-2-3p, miR-194a, miR-466f-3p, miR-665, miR-31-5p, miR-103a-3p, miR-6238, miR-103, miR-432-5p, miR-412-5p, miR-22-3p, miR-3071-5p, novel\_23, miR-194-5p, miR-432, miR-542-3p, miR-2113, miR-1434-3p, miR-497-5p, miR-26a-2-3p, miR-27b-3p, miR-16b, miR-16-5p, miR-144-5p, miR-378c, miR-145-3p, miR-374a-3p, miR-1197-3p, miR-135a-5p, novel\_63, miR-370-5p, miR-31-3p, miR-let-7f-2-3p, let-7f-2-3p, miR-424-5p, miR-503-3p, miR-3956-5p, miR-16b, miR-107, miR-5010-3p, miR-103a-3p, novel\_121, miR-103, miR-582-3p, miR-15a-5p, miR-322-5p, novel\_23, miR-2284x, miR-497-5p, miR-16b, novel\_101, miR-6527, miR-16-5p, miR-193a-5p, miR-4510, miR-371b-3p, miR-665, miR-16a, miR-576-3p, miR-15a, miR-424-5p, novel\_1, miR-2285aa, miR-1185-2-3p, miR-15b-5p, miR-6130, miR-2284s, miR-301, miR-361-3p, miR-195a-5p, miR-107, let-7g-3p

UBE4A

ENSOARGO(ubiquitin)

KIF5C

ENSOARGO(kinesin)

novel\_99, miR-21a-3p, miR-204-3p, miR-192-5p, miR-193b-3p, miR-370-5p, miR-221-5p, miR-378a-3p, miR-660-5p, miR-424-5p, miR-450b-3p, miR-17-3p, miR-324-3p, miR-3074-2-3p, miR-378c, miR-145a-3p, miR-378d, miR-2904, miR-1193, miR-188-3p, miR-140-3p, miR-5703, novel\_133, miR-362-3p, miR-215-5p, miR-2408, novel\_83, miR-15a-5p, miR-222-5p, miR-200b, miR-505-3p, miR-221-5p, miR-21-3p, miR-2284m, miR-216a-5p, miR-185-3p, miR-146a-5p, miR-29b-1-5p, miR-216c-5p, miR-183-5p, miR-199b-5p, miR-378e, miR-3082-5p, miR-664b, miR-452-3p, miR-20a-3p, miR-154a, miR-181d-5p, miR-194b-5p, novel\_60, miR-3059-5p, miR-541-3p, miR-2284aa, miR-378c, miR-450b-5p, miR-2426, miR-299a-5p, miR-378b, miR-6529a, miR-5010-3p, novel\_4, miR-2300a-5p, miR-3955-3p, miR-362-3p, miR-326, miR-30c-1-3p, miR-382-3p, miR-494-3p, miR-2330-5p, miR-424-5p, miR-485-5p, miR-10b-3p, let-7g-3p, miR-3154, miR-381-3p, miR-199a-5p, miR-2284n, miR-374c-3p, miR-370-3p, miR-215-5p, miR-204-5p, miR-138-5p, miR-331-3p, miR-3969, miR-135a-5p, miR-410-5p, miR-370-5p, miR-378c, miR-3607-3p, miR-200b-3p, let-7a-2-3p, miR-300, miR-345-3p, miR-3578, miR-545-5p, miR-483-3p, miR-378h, miR-107, miR-543-5p, miR-2898, miR-17-3p, miR-200c-3p, miR-181b-5p, miR-30c-2-3p, miR-376b-3p, miR-200c, miR-199a-5p, miR-2385-3p, miR-4286, miR-181a-2-3p, miR-2403, miR-3529-3p, miR-505-3p, miR-195a-5p, miR-135b-5p, miR-450b-3p, miR-107, miR-18a-3p, miR-2387, miR-670-3p, miR-7-1-3p, miR-502b, novel\_1, miR-16a, miR-15a, miR-326-3p, miR-211, miR-24-3p, miR-3957-3p, miR-17-3p, miR-1193, miR-495-3p, miR-2285x, miR-138, miR-194-5p, miR-374b-3p, miR-873a-5p, miR-181a-5p, miR-1285, miR-103, miR-2355-3p, miR-2284d, miR-432-5p, miR-26b-3p, miR-133b-5p, miR-1343-5p, miR-452-5p, miR-660, miR-654-3p, miR-543-3p, miR-625-5p, miR-186-5p, miR-1897, miR-133-3p, miR-299, miR-150a-1-3p, miR-17-3p, miR-2285b, miR-10b-3p, miR-200a, miR-99a, miR-2440, novel\_87, miR-99a-5p, miR-3601, miR-17-3p, miR-6119-3p, miR-17-3p, miR-21-3p, miR-200a-3p, miR-141-3p, miR-3959-5p, miR-223-5p, miR-100-5p, miR-99b-5p, miR-10b-3p, miR-99a-5p, miR-136-5p, miR-30f, novel\_94, miR-381-3p, miR-30e-5p, miR-3082-5p, miR-192-5p, miR-329-5p, miR-215-5p, miR-182-5p, miR-6402, miR-30b-5p, miR-2285n, miR-2285y, miR-326-3p, novel\_101, miR-665-5p, miR-33b-3p, miR-300, miR-376a-5p, miR-215-5p, miR-30c-5p, miR-30a-5p, miR-330-5p, miR-194-3p, miR-409b, miR-2285ad, miR-7641, miR-450a-2-3p, miR-125a-3p, miR-326, miR-30b, miR-182-5p, miR-30f, miR-376a-5p, miR-329a-5p

BAG1

ENSOARGO(BCL2-ass

DNAJC16

ENSOARGO(DnaJ (Hs

MAL2

ENSOARGO(mal, T-c

miR-3120-5p, miR-455-5p, miR-30b-3p, miR-16-1-3p, miR-2426, miR-197-3p, miR-30b-3p, miR-3071-5p, miR-708-3p, miR-143-5p, miR-301b-5p, miR-9788-3p, miR-421, miR-3955-5p, miR-31-5p, miR-1343-3p, miR-330-3p, miR-214-3p, miR-103a-2-5p, miR-378a-5p, miR-365b-5p, miR-330-3p, miR-455-5p, miR-326, miR-193a, let-7c-3p, miR-2483-5p, miR-380-5p, miR-6240, miR-335-3p, miR-1291, miR-96-5p, miR-3591-3p, miR-148a-3p, miR-2387, miR-652-3p, miR-669, miR-7857-3p, miR-2404, miR-7977, miR-216b-3p, miR-329-5p, miR-2285t, miR-147-5p, miR-371a-5p, miR-301a-5p, miR-107-5p, miR-4324, miR-218-5p, miR-423-5p, miR-326-3p, miR-7705, miR-2284w, miR-361-3p, novel\_60, miR-32-3p, novel\_120, miR-212-3p, miR-3956-3p, miR-378d, miR-941, miR-330-5p, miR-5703, miR-23b-5p, miR-2300b-3p, miR-134, miR-134-5p, miR-148b-3p, miR-23c, miR-1271-5p, miR-3600, miR-30d-3p, miR-200a-3p, miR-21-3p, miR-152-3p, miR-2898, miR-324-3p, miR-125a-3p, miR-6119-5p, miR-618, miR-200a, miR-1957a, miR-2285b, miR-1271-3p, miR-192-3p, miR-380-5p, miR-29b-2-5p, miR-30a-3p, miR-183-5p, miR-329a-5p, miR-582-5p, let-7g-3p, miR-876-3p, miR-2448-3p, novel\_32, miR-582-5p, miR-2355-5p, miR-21-3p, miR-141-3p, miR-140-5p, miR-32-3p, miR-3068-3p, miR-708-5p, miR-28-5p, miR-134-5p, miR-30a-3p, miR-665, miR-320e, miR-29b-2-5p, miR-30e-3p, miR-3184-5p, miR-365a-5p, miR-1197-3p, miR-1271, miR-2330-3p, miR-214

miR-18a-3p, miR-378b, miR-150-5p, miR-639b, miR-2319a, miR-146b-5p, miR-1291, miR-10a-5p, miR-3074-5p, miR-669, miR-670-3p, novel\_69, miR-29a-3p, miR-146b-3p, miR-33a-3p, miR-6402, miR-1247-3p, miR-502-5p, miR-4324, miR-29a, miR-206, miR-758-5p, miR-29c-3p, miR-2428, miR-326-3p, miR-24-3p, miR-3071-5p, miR-432, miR-4508, miR-1260b, miR-30b-3p, miR-138, miR-29b, miR-26b-3p, miR-544b, miR-2355-3p, miR-149-5p, miR-3431, miR-2285g, miR-432-5p, novel\_51, miR-377-3p, miR-146a, miR-125a-5p, miR-628-5p, miR-363-5p, miR-380-5p, miR-345-5p, miR-3154, miR-2448-3p, miR-671-5p, miR-485-5p, miR-7144-5p, miR-23a-5p, miR-345-5p, miR-329a, miR-876-3p, miR-767, miR-125a, miR-1271, miR-215-5p, miR-2355-5p, miR-370-3p, miR-874-3p, miR-154b-5p, miR-3969, miR-125b-5p, miR-331-3p, miR-29b-3p, miR-134-5p, miR-486b-3p, miR-28-5p, miR-767-5p, miR-138-5p, miR-133a-3p, miR-1306-5p, miR-1197-3p, miR-1260b, miR-330-5p, miR-23b-5p, miR-29d-3p, miR-134, miR-3578, miR-10a-5p, miR-2285ad, miR-214-5p, miR-134-5p, miR-2285af, miR-1260a, novel\_96, miR-543-5p, novel\_127, miR-2898, miR-181a-2-3p, miR-1, miR-3064-5p, miR-29b-2-5p, miR-3065-3p, miR-380-5p, miR-140-5p, miR-877-3p, miR-504, miR-7977, miR-499b-5p, miR-452-3p, miR-3064-5p, miR-4792, miR-2483-3p, miR-301a-5p, miR-2285y, miR-4726-5p, miR-219a-5p, miR-212-3p, miR-2447, miR-423-5p, miR-361-3p, miR-30b-3p, miR-1a-3p, miR-10b, miR-301b-5p, miR-2284r, miR-484, miR-296-5p, miR-329-3p, miR-3120-5p, miR-544a, miR-362-3p, miR-2300a-5p, miR-1343-3p, miR-2285e, miR-1298-3p, miR-147a, miR-362-3p, miR-326, miR-146b, miR-491-5p, miR-3085-3p, let-7c-3p, miR-494-3p, miR-2330-5p, miR-124a, miR-1388-3p, miR-4532, miR-500a-3p, miR-2285c, miR-21a-3p, miR-1827, miR-345-5p, miR-133b-3p, let-7g-3p, miR-3065-3p, miR-140-5p, miR-2331-3p, miR-504-5p, miR-877-5p, novel\_32, miR-204-3p, miR-

miR-22-3p, novel\_23, miR-1843b-5p, miR-7b-5p, miR-27b-3p, miR-138, miR-29b, miR-2284ab, miR-1260b, miR-16-1-3p, miR-26b-3p, miR-149-5p, miR-194-3p, miR-20b, miR-2284d, miR-3431, miR-134-3p, miR-503-5p, miR-365b-5p, miR-197-5p, miR-106a-5p, novel\_51, miR-17-5p, miR-7-5p, miR-503-5p, miR-146a, miR-296-3p, miR-1343-5p, miR-466f-3p, miR-668-3p, miR-296-3p, let-7a-2-3p, miR-654-3p, miR-1306, miR-18a-3p, miR-216a-3p, miR-2319a, miR-146b-5p, miR-450b-3p, miR-1291, miR-320b, miR-7-1-3p, miR-144-3p, miR-6535, novel\_69, miR-34b, miR-374c-3p, miR-29a-3p, miR-34c, miR-4324, miR-28c, miR-20a-5p, miR-22-5p, miR-656-5p, miR-128-1-5p, miR-29a, miR-3957-3p, miR-29c-3p, miR-495-3p, miR-17-3p, miR-135a-2-3p, miR-449a, miR-326-3p, miR-24-3p, miR-1307-3p, miR-29d-3p, miR-1343-5p, miR-330-5p, miR-30a-5p, miR-128-3p, miR-30c, let-7a-2-3p, miR-1224-5p, miR-6517, miR-582-3p, miR-2284z, novel\_121, miR-129-1-3p, miR-505-5p, miR-30c-2-3p, miR-1260a, miR-6119-5p, novel\_127, novel\_96, miR-450a-2-3p, miR-17-3p, miR-4286, miR-181a-2-3p, miR-3065-3p, miR-200a, miR-490-3p, miR-28b, miR-93-5p, miR-3154, miR-17-5p, miR-30e-5p, miR-20b-5p, miR-485-5p, miR-1248, let-7g-3p, miR-329a, miR-370-3p, miR-1271, miR-874-3p, miR-34c-5p, miR-769, miR-144, miR-331-3p, miR-29b-3p, miR-3432a, miR-28-5p, miR-486b-3p, miR-138-5p, miR-133a-3p, miR-2284v, miR-365a-5p, miR-93, miR-1260b, miR-125b-2-3p, miR-296-5p, miR-2284r, miR-329-3p, miR-484, miR-16-2-3p, miR-2284aa, miR-3120-5p, miR-362-3p, miR-27a-3p, novel\_4, novel\_78, miR-409b, miR-2300a-5p, miR-1343-3p, miR-216a-3p, miR-1298-3p, miR-362-3p, miR-106b-5p, miR-1306-5p, miR-5126, miR-326, miR-146b, miR-214-3p, miR-491-5p, novel\_124, miR-382-3p, miR-106a-5p, miR-8485, miR-4532, miR-193a, miR-30c-1-3p, miR-361-3p, novel\_94, miR-877-3p, miR-147-3p, miR-27a-3p, miR-378a, miR-769-5p, miR-30b-

UNK

ENSOARGO( unkempt

miR-20a, miR-2432, miR-143-3p, miR-125b-2-3p, miR-181b-1-3p, miR-130a-5p, miR-185-3p, miR-92a-1-5p, miR-345-3p, miR-210-5p, miR-34b-5p, miR-21-3p, miR-299-3p, miR-106a, miR-760-3p, miR-1b-3p, miR-3600, miR-380-5p, miR-30d-3p, miR-18a-3p, miR-3960, miR-106a, miR-532-3p, miR-328-3p, miR-2904, miR-5703, novel\_133, miR-2300b-3p, miR-133a-3p, miR-34a-5p, miR-378d, miR-493-3p, miR-184-3p, miR-214, miR-145a-3p, miR-3074-5p, miR-3184-3p, miR-4510, miR-3184-5p, miR-338-3p, miR-6525, miR-224-5p, miR-346, miR-30a-3p, miR-665, miR-29b-2-5p, miR-30e-3p, miR-4492, miR-17-3p, miR-487b-5p, miR-3065-3p, miR-552-3p, miR-296-3p, miR-140-5p, miR-504-5p, miR-30c-1-3p, miR-204-3p, miR-6130, miR-193b-3p, miR-139-5p, miR-21a-3p, miR-1895, miR-133b-3p, miR-345-5p, miR-1388-3p, miR-494-3p, miR-106a-5p, miR-101b-3p, miR-30c-1-3p, miR-2957, miR-106b-5p, novel\_103, miR-431-5p, miR-5126, miR-326, miR-103a-2-5p, miR-214-3p, miR-491-5p, miR-181b-2-3p, miR-1343-3p, miR-9788-3p, miR-216a-3p, miR-500-5p, miR-455-3p, miR-425-3p, miR-125b-2-3p, miR-484, miR-541, miR-101c, miR-450b-5p, miR-2426, miR-2447, miR-541-3p, miR-8095, miR-423-5p, miR-362-5p, miR-107-5p, miR-101-3p, miR-2440, miR-628-3p, miR-3968, miR-7689-3p, miR-541-5p, miR-211-5p, miR-139-5p, miR-241-5p, miR-4443, miR-378g, miR-129b-5p, miR-335-3p, miR-877-3p, novel\_94, miR-1983, miR-668-5p, miR-504, miR-30a-3p, miR-29b-2-5p, miR-181a-2-3p, miR-2403, miR-1957a, novel\_39, miR-3065-3p, miR-490-3p, miR-28b, miR-380-5p, miR-24-2-5p, miR-148b-5p, miR-30f, miR-30c-2-3p, miR-125a-3p, novel\_127, novel\_96, miR-17-3p, miR-2898, miR-7641, miR-1224-5p, miR-431, miR-299a-3p, miR-505-5p, miR-24-2-5p, miR-483-3p, miR-758-5p, miR-1343-5p, miR-330-5p, miR-345-3p, miR-133a-3p, miR-1306-5p, miR-500b-5p, miR-93, miR-331-3p, miR-6740-5p, miR-409-3p, miR-2433, miR-551b-3p, miR-204-5p, miR-130b-3p, miR-2957, miR-2284b, miR-1839-5p, miR-1260b, miR-708-3p, miR-216a-3p, miR-421, miR-376b-3p, miR-130a-3p, miR-133b-5p, miR-203b-5p, miR-2284q, miR-6119-3p, miR-33a-3p, miR-218-5p, miR-301b-3p, miR-371b-3p, miR-3059-5p, miR-376a-3p, miR-6516-3p, miR-505-3p, miR-379-5p, miR-216a-3p, miR-376b-3p, miR-3065-5p, miR-148a-3p, miR-376d, miR-489, miR-670-3p, miR-655-5p, miR-2284g, miR-3653-3p, miR-152-3p, miR-200a-3p, miR-3071-3p, miR-1260a, miR-376b-3p, miR-2284y, miR-200a, miR-2424, miR-2284a, miR-143-3p, miR-192-3p, miR-30a-3p, miR-29b-2-5p, miR-128-3p, miR-2284u, miR-411-3p, miR-98-3p, miR-140-3p, miR-582-3p, miR-7859, miR-148b-3p, miR-1224-5p, miR-505-3p, miR-30d-3p, miR-548e-3p, miR-410-3p, miR-454-3p, miR-487b-5p, miR-30a-3p, miR-29b-2-5p, let-7b-3p, miR-30e-3p, miR-1260b, miR-98-3p, miR-193a-5p, miR-7144-5p, miR-487b-5p, let-7f-1-3p, miR-324-5p, miR-301a-3p, miR-3965, miR-2285aa, miR-532-5p, miR-141-3p, miR-324-3p, miR-664a, miR-450a-2-3p, miR-491-5p, novel\_96, miR-1343-5p, miR-329a-5p, miR-1343-5p, miR-197-3p, miR-329b, miR-2426, miR-876-3p, miR-6395, miR-485-5p, miR-505-3p, miR-329-5p, miR-2300a-5p, miR-1271, miR-505-3p, miR-421, miR-328-3p



miR-1814c, miR-199a-5p, miR-235b-5p, miR-2285aa, miR-1271, miR-215-5p, miR-487a-3p, miR-3068-3p, miR-3432a, miR-486b-3p, miR-144, miR-135a-5p, miR-2284k, miR-323-3p, miR-6128, miR-105-2, miR-200b-3p, miR-2427, miR-330-5p, miR-196a-5p, miR-345-3p, miR-582-3p, miR-545-5p, miR-302a-5p, miR-24-2-5p, miR-1224-5p, miR-429-3p, miR-543-5p, novel\_96, miR-450a-2-3p, miR-200c-3p, miR-30c-2-3p, miR-200c, novel\_39, miR-199a-5p, miR-24-2-5p, miR-30a-3p, miR-3529-3p, miR-2319a, miR-135b-5p, miR-6516-3p, miR-19a-3p, miR-1306, miR-3065-5p, miR-378b, miR-3591-3p, miR-2387, miR-144-3p, miR-677, miR-181b-3p, miR-411b-3p, miR-3120-3p, miR-3074-5p, miR-378b, miR-625-3p, miR-421-5p, miR-203b-5p, miR-502b, miR-199c, novel\_1, miR-382-5p, miR-133a-5p, miR-326-3p, novel\_27, miR-199b-5p, miR-2428, miR-3959-3p, miR-342-3p, miR-455-5p, miR-2284x, miR-30b-3p, miR-219a-1-3p, miR-223-3p, miR-2113, novel\_116, miR-2285g, miR-134-3p, miR-26b-3p, miR-377-5p, miR-3955-5p, miR-452-5p, miR-196b-5p, miR-190a, miR-105-5p, miR-2411-3p, miR-455-5p, miR-224-5p, miR-377-3p, miR-539-3p, miR-503-3p, miR-432-3p, miR-432-3p, miR-668-3p, miR-382, let-7f-2-3p, let-7f-2-3p, miR-130b-5p, miR-543-3p, miR-186-5p, miR-154b-3p, miR-2285c, miR-377-3p, miR-192-5p, miR-216b-5p, miR-139-5p, miR-216b-3p, miR-154a-3p, miR-21-3p, miR-182-5p, miR-30c-1-3p, miR-548o-3p, miR-190a-5p, miR-129-5p, miR-130b-5p, miR-6516-3p, miR-487b-5p, miR-324-3p, miR-30a-3p, miR-3604, miR-338-5p, miR-2285j, miR-30e-3p, miR-6525, miR-224-5p, miR-3184-3p, miR-3074-5p, miR-145a-3p, miR-142-3p, miR-19b-3p, miR-5703, novel\_133, miR-215-5p, miR-1246, miR-2284h-5p, miR-7859, miR-487a-3p, miR-200b, miR-30d-3p, miR-2284m, miR-466i-5p, miR-345-3p, miR-196a-3p, miR-618, miR-2285p, miR-486-3p, miR-2424, miR-29b-1-5p, miR-181b-1-3p, miR-125b-2-3p, miR-377-5p, miR-142a-3p, miR-345-3p, miR-182-5p, miR-487a, miR-133a-3p, miR-224-5p, miR-142a-5p, miR-365a-5p, miR-664a, miR-30c-1-3p, miR-216b-5p, miR-6516, miR-374c-3p, miR-2285c, miR-301, miR-488-3p, miR-3154, miR-376c-5p, miR-137-3p, miR-345-5p, miR-345-5p, miR-133b-3p, miR-10b-3p, miR-485-5p, miR-376c-5p, miR-345-3p, miR-376a-5p, novel\_39, miR-345-3p, miR-30c-2-3p, miR-466i-5p, miR-450a-2-3p, miR-6516-5p, miR-483-3p, miR-532-3p, miR-345-3p, miR-188-3p, miR-5703, miR-330-5p, miR-1343-5p, miR-218-1-3p, miR-133a-3p, miR-24-3p, miR-2428, miR-326-3p, miR-374c-3p, miR-4443, miR-376b-5p, miR-877-3p, miR-6516-3p, miR-2319a, miR-6240, miR-30c-1-3p, miR-345-5p, miR-8485, miR-326, novel\_103, miR-224-5p, miR-2411-3p, miR-330-3p, miR-365b-5p, miR-483-3p, miR-378a-5p, miR-1343-5p, novel\_78, miR-330-3p, miR-539-5p, miR-2285g, miR-3535, miR-2285e, miR-4791, miR-125b-2-3p, miR-450b-5p

miR-1827, miR-885-3p, miR-1895, miR-625-5p, miR-133b-3p, miR-151b, miR-204-3p, miR-22-3p, miR-6130, miR-499b-3p, miR-296-3p, miR-370-5p, miR-2331-3p, miR-140-5p, miR-221-5p, miR-874-5p, miR-665, miR-19b-1-5p, miR-222-3p, miR-6134, miR-338-3p, miR-3184-5p, miR-346, miR-214, miR-129-2-3p, miR-4510, miR-145a-3p, miR-34a-5p, miR-148a-5p, miR-133a-3p, miR-4429, miR-1197-5p, miR-1193, miR-5703, miR-199a-3p, miR-151-5p, miR-2284h-5p, miR-200b, miR-383-5p, miR-7859, miR-106a, miR-548e-3p, miR-18a-3p, miR-34b-5p, miR-30b-3p, miR-221-5p, miR-106a, miR-92a-1-5p, miR-185-3p, miR-219b-5p, miR-324-3p, miR-542-5p, miR-486-3p, miR-2432, miR-125b-2-3p, miR-345-3p, miR-20a, miR-221, miR-361-3p, miR-203-3p, miR-144-5p, miR-499a-3p, miR-378g, miR-499b-5p, miR-452-3p, miR-20a-3p, miR-3064-5p, miR-4792, miR-101-3p, miR-2440, miR-423-5p, miR-361-3p, miR-541-3p, miR-212-3p, miR-2447, miR-30b-3p, miR-541, miR-484, miR-9788-3p, miR-148b-5p, miR-221-3p, miR-539-5p, miR-425-3p, miR-199b-3p, novel\_4, miR-1343-3p, miR-2300a-5p, miR-542-5p, miR-214-3p, miR-25-5p, miR-487b-5p, miR-491-5p, miR-3085-3p, miR-106b-5p, miR-2957, miR-320b, miR-199a-3p, miR-342, miR-4532, miR-33a-5p, miR-101b-3p, miR-106a-5p, miR-485-5p, miR-20b-5p, miR-320a, miR-17-5p, miR-3154, miR-93-5p, miR-34c-5p, miR-2355-5p, miR-874-3p, miR-574-5p, miR-486b-3p, miR-134-5p, miR-3969, miR-331-3p, miR-370-5p, miR-5100, miR-2433, miR-93, miR-133a-3p, miR-144-5p, miR-200b-3p, miR-885-3p, miR-134, miR-129-1-3p, miR-214-5p, miR-134-5p, miR-483-3p, miR-429-3p, miR-222, novel\_96, novel\_127, miR-200c-3p, miR-200c, novel\_39, miR-148b-5p, miR-4286, miR-2403, miR-3064-5p, miR-1291, miR-18a-3p, miR-150-5p, miR-3141, miR-2387, miR-669, miR-6535, novel\_69, miR-34b, miR-2404, miR-199c, miR-656-5p, miR-128-1-5p, miR-34c, miR-20a-5p, miR-1247-3p, miR-449a, miR-371b-3p, miR-322c, miR-542-5p, miR-1193, miR-342-

miR-214-5p, miR-532-3p, miR-616-3p, miR-148b-3p, miR-212-5p, miR-3600, miR-412, miR-2285ad, miR-218-1-3p, miR-133a-3p, let-7d, miR-1197-5p, miR-330-5p, miR-2904, miR-1343-5p, miR-2427, miR-2300b-3p, miR-1961, miR-193b-5p, miR-486-3p, let-7g, miR-377-5p, miR-130a-5p, miR-450b-5p, miR-4286, novel\_96, miR-152-3p, let-7k, miR-21-3p, miR-221-5p, miR-760-3p, let-7f-5p, miR-98-5p, miR-2898, let-7c-5p, miR-125b, miR-324-3p, miR-1260a, let-7i-5p, miR-204-3p, novel\_25, miR-323-5p, miR-6130, miR-2284s, miR-544-3p, miR-125a, miR-615-5p, miR-216b-3p, miR-221-5p, miR-186-5p, miR-7144-5p, miR-767, miR-3154, miR-500a-3p, miR-338-3p, let-7b-5p, miR-1260b, miR-214, miR-6128, miR-145a-3p, miR-4510, let-7b, miR-130b-5p, miR-486b-3p, miR-592, miR-500, miR-4492, miR-767-5p, miR-665, miR-100-3p, miR-125b-5p, miR-135a-1-3p, let-7f, miR-544b, let-7g-5p, miR-134-3p, miR-185-5p, miR-377-5p, miR-26b-3p, miR-1343-3p, novel\_4, miR-409b, miR-2300a-5p, miR-3120-5p, miR-544a, miR-1260b, miR-412-3p, miR-197-3p, miR-143-5p, miR-541, miR-484, miR-296-5p, miR-4532, miR-652-5p, miR-363-5p, let-7a-5p, miR-130b-5p, miR-214-3p, let-7e, miR-125a-5p, miR-1343-5p, miR-491-5p, miR-326, miR-454-5p, miR-669, let-7d-5p, miR-489, miR-323a-5p, miR-378g, miR-320b, miR-452-3p, miR-2319b, novel\_94, let-7e-5p, miR-9851-3p, miR-668-5p, miR-3970, miR-148a-3p, miR-2387, miR-326-3p, miR-24-3p, miR-495-3p, miR-541-3p, miR-2447, let-7i, miR-2285y

miR-29b-1-5p, miR-323b-3p, miR-199a-3p, miR-214-3p, miR-124-5p, miR-101b-3p, miR-493-5p, miR-2284l, miR-432-3p, miR-432-3p, miR-30b-3p, miR-323b, miR-1285, miR-181a-5p, miR-4791, miR-6529a, miR-2284aa, miR-101a-5p, miR-2426, miR-219a-1-3p, miR-380-3p, miR-29b, miR-30b-3p, miR-1388-5p, miR-2284ab, miR-665, miR-133b-5p, miR-1343-3p, miR-103a-3p, miR-103, miR-455-3p, miR-9788-3p, novel\_116, miR-216a-3p, miR-3535, miR-2284d, miR-34c, miR-101-3p, miR-30b-5p, miR-502-5p, miR-147-5p, miR-29a, miR-29c-3p, miR-452-5p, miR-181d-5p, miR-219a-2-3p, miR-2428, miR-449a, miR-378j, miR-376b-5p, miR-6516-3p, miR-9-3p, miR-493-5p, miR-668-5p, miR-107, miR-504, miR-7-1-3p, miR-655-5p, miR-216b-3p, miR-144-3p, miR-3082-5p, miR-29a-3p, miR-34b, miR-3596, miR-200c, miR-219-3p, miR-30b, miR-34b-5p, miR-30d, miR-107, miR-181b-5p, miR-127-5p, miR-200c-3p, miR-380-3p, miR-486-3p, novel\_39, miR-29b-1-5p, miR-30a-5p, miR-5703, miR-2427, miR-29d-3p, miR-134, miR-30c-5p, miR-34a-5p, miR-30c, miR-218-1-3p, miR-200b-3p, miR-212-5p, miR-429-3p, miR-2284z, miR-199a-3p, miR-134-5p, miR-545-5p, miR-200b, miR-340-5p, miR-383-5p, miR-219b-3p, miR-100-3p, miR-144, miR-29b-3p, miR-34c-3p, miR-2284k, miR-134-5p, miR-486b-3p, miR-874-5p, miR-767-5p, miR-6516-3p, miR-214, miR-2284v, miR-539-5p, miR-181c-5p, miR-323-3p, miR-6525, miR-3154, miR-30d-5p, miR-598-3p, miR-30e-5p, miR-30f, miR-767, miR-598-3p, miR-3068-3p, miR-504-5p, novel\_25, miR-27a-5p, miR-34c-5p

PLA2G3 ENSOARGO( phosphol

LDHA ENSOARGO( lactate

miR-20a, miR-369-3p, miR-329a-5p, miR-2432, miR-2411, miR-142a-3p, miR-130a-5p, miR-376a-5p, miR-29b-1-5p, miR-185-3p, miR-125b, miR-2285p, miR-196a-3p, miR-299-3p, miR-34b-5p, miR-760-3p, miR-106a, miR-202-5p, miR-485-3p, miR-106a, miR-18a-3p, novel\_83, miR-23c, miR-23b-3p, miR-487a-3p, miR-1197-5p, miR-217-5p, miR-140-3p, miR-1434-5p, miR-2904, miR-376a-5p, miR-1246, miR-148a-5p, miR-34a-5p, miR-2284u, miR-218-1-3p, miR-214, miR-181c-5p, miR-338-3p, miR-6134, miR-142a-5p, miR-655-3p, miR-2285j, miR-669a-3p, miR-190a-5p, miR-500, miR-129-5p, miR-454-3p, miR-17-3p, miR-450b-3p, miR-182-5p, miR-216b-3p, miR-21-3p, miR-548o-3p, miR-2331-3p, miR-301a-3p, miR-377-3p, miR-655, miR-500a-3p, miR-450a-1-3p, novel\_99, miR-543-3p, miR-625-5p, miR-339b, miR-345-5p, miR-133b-3p, let-7g-3p, miR-33a-5p, miR-23a-3p, miR-1839-3p, miR-106a-5p, miR-2330-5p, miR-8485, miR-182-5p, miR-106b-3p, miR-29b-1-5p, miR-326, miR-214-3p, miR-103a-2-5p, miR-199b-5p, miR-130b-3p, miR-3955-3p, miR-199b-3p, novel\_4, miR-548w, miR-421, miR-2459, miR-148b-5p, miR-147a, miR-142-3p, miR-501-3p, miR-484, miR-2284aa, miR-190b-5p, miR-194b-5p, miR-2284j, miR-452-5p, miR-181d-5p, miR-212-3p, miR-7705, miR-502-3p, novel\_111, miR-107-5p, miR-371a-5p, miR-2440, miR-218-5p, miR-499a-5p, miR-628-3p, miR-211-5p, miR-20a-3p, miR-2284g, miR-500-3p, miR-203-3p, miR-3082-5p, miR-2483-3p, miR-25, miR-3596, miR-378j, miR-129b-5p, miR-199b-5p, miR-361-3p, miR-9-3p, miR-493-5p, miR-335-3p, miR-299b-5p, miR-3529-3p, miR-2284a, miR-2284y, miR-200a, miR-199a-5p, miR-29a-5p, miR-217, miR-339a, miR-3071-3p, miR-543-5p, novel\_127, miR-200a-3p, miR-181b-5p, miR-17-3p, miR-28-3p, miR-376a-5p, miR-196a-2-3p, novel\_79, miR-6517, miR-2285ad, miR-299a-3p, miR-2284z, miR-582-3p, miR-450a-1-3p, miR-2411-5p, miR-501-3p, miR-330-5p, miR-29d-3p, miR-3591-

miR-299-3p, miR-320d, miR-2284m, miR-216a-5p, miR-324-3p, miR-185-3p, miR-26a-5p, miR-618, miR-486-3p, miR-380-3p, miR-218-1-3p, miR-4429, miR-2904, miR-217-5p, miR-2366, miR-215-5p, miR-23b-3p, miR-15a-5p, miR-505-3p, miR-4492, miR-424-5p, miR-190a-5p, miR-450b-3p, novel\_74, miR-3604, miR-15b-3p, miR-2285j, miR-224-5p, miR-129-2-3p, miR-3184-3p, miR-1827, miR-450a-1-3p, miR-204-3p, miR-15b-5p, miR-377-3p, miR-544-3p, miR-192-5p, miR-27a-5p, miR-323-5p, miR-21-3p, miR-3065-3p, miR-545-3p, miR-16b, miR-320b, miR-23a-3p, miR-1388-3p, miR-424-5p, miR-21b, miR-1839-5p, miR-16-2-3p, miR-544a, miR-412-3p, miR-541, miR-2285t, miR-2440, miR-452-5p, miR-2284j, miR-9-5p, miR-190b-5p, miR-2447, miR-3059-5p, miR-541-3p, miR-212-3p, miR-335-3p, miR-299b-5p, miR-203-3p, miR-144-5p, miR-3082-5p, miR-200c-3p, miR-127-5p, miR-181c-3p, miR-217, miR-2285af, miR-200c, miR-6119-5p, miR-376c-5p, miR-3065-3p, miR-2285b, miR-181a-2-3p, miR-3529-3p, miR-1343-5p, miR-29d-3p, miR-3591-5p, miR-3578, miR-450a-1-3p, miR-129-1-3p, miR-322-5p, miR-9-5p, miR-412, miR-1224-5p, miR-299a-3p, miR-486b-3p, novel\_63, miR-34c-3p, miR-29b-3p, miR-1197-3p, miR-16-5p, miR-144-5p, miR-320a, miR-23b, miR-301, miR-2284n, miR-331-5p, miR-374c-3p, miR-215-5p, miR-1343-5p, miR-190a, miR-224-5p, miR-377-3p, miR-497-5p, miR-16b, miR-29b, miR-380-3p, miR-2284ab, miR-450c-3p, miR-374b-3p, miR-411-5p, miR-544b, miR-412-5p, miR-665, miR-26b-3p, novel\_1, miR-29a, miR-16a, miR-33a-3p, novel\_87, miR-15a, miR-2284w, miR-29c-3p, miR-495-3p, miR-135a-2-3p, miR-219b-3p, miR-195a-5p, miR-505-3p, miR-6516-3p, miR-450b-3p, miR-3591-3p, miR-669, miR-320c, miR-323a-5p, miR-299b-3p, miR-374c-3p, miR-670-3p, miR-29a-3p, miR-26b-5p, miR-3529-3p, miR-342-3p, novel\_79, miR-339-5p, miR-377-3p, miR-8485, miR-377-3p, miR-342, miR-339a, miR-339b, miR-466f-3p, miR-433-5p, miR-1271, miR-3074-2-3p, miR-410-5p, miR-2284k, miR-125b-5p, miR-665, miR-29b-2-5p, miR-664a, miR-486b-3p, miR-2331-3p, miR-2355-5p, miR-370-3p, miR-125a, miR-1271, miR-27a-5p, miR-301, miR-200a-5p, miR-3154, miR-345-5p, miR-329a, miR-345-5p, miR-1827, miR-29b-2-5p, miR-181b-1-3p, miR-486-3p, novel\_39, miR-143-3p, miR-26a-5p, miR-345-3p, miR-125b, miR-543-5p, miR-1271-5p, miR-345-3p, miR-362-3p, miR-124-3p, miR-5703, miR-1193, miR-582-3p, novel\_60, miR-3956-3p, miR-877-3p, miR-7705, miR-2428, miR-655-5p, miR-541-5p, miR-3120-3p, miR-26b-5p, miR-3082-5p, miR-677, miR-181b-3p, miR-129b-5p, miR-96-5p, miR-9851-3p, miR-335-3p, miR-124a, miR-628-5p, miR-432-3p, miR-432-3p, miR-345-5p, miR-7-5p, novel\_115, miR-362-3p, miR-2411-3p, miR-125a-5p, miR-381-5p, miR-145b, miR-181b-2-3p, miR-539-5p, miR-9788-3p, miR-329-3p, miR-296-5p, miR-7b-5p, miR-2113, miR-197-3p, miR-145a-5p, miR-30b-3p, miR-362-3p, miR-1388-5p, miR-30b-3p, miR-2284ab, miR-381-5p, miR-219a-1-3p, miR-101c, miR-188-5p

|       |                     |                                                                                                                                                                                                                                                                                                                                                                                                                                                                                                                                                                                                                                                                                                                                                                                                                                                                                                                                                                                                                                                                                                                                                                                                                                                                                                                                                                                                                                                                                                                                                                                                                                                                                                                                                                                                                                                                                                                                                                                                                                                                                                                                                                                                                                                                                                                                                                                                                                                                                                                                                                                                                                                                                                                           |
|-------|---------------------|---------------------------------------------------------------------------------------------------------------------------------------------------------------------------------------------------------------------------------------------------------------------------------------------------------------------------------------------------------------------------------------------------------------------------------------------------------------------------------------------------------------------------------------------------------------------------------------------------------------------------------------------------------------------------------------------------------------------------------------------------------------------------------------------------------------------------------------------------------------------------------------------------------------------------------------------------------------------------------------------------------------------------------------------------------------------------------------------------------------------------------------------------------------------------------------------------------------------------------------------------------------------------------------------------------------------------------------------------------------------------------------------------------------------------------------------------------------------------------------------------------------------------------------------------------------------------------------------------------------------------------------------------------------------------------------------------------------------------------------------------------------------------------------------------------------------------------------------------------------------------------------------------------------------------------------------------------------------------------------------------------------------------------------------------------------------------------------------------------------------------------------------------------------------------------------------------------------------------------------------------------------------------------------------------------------------------------------------------------------------------------------------------------------------------------------------------------------------------------------------------------------------------------------------------------------------------------------------------------------------------------------------------------------------------------------------------------------------------|
| RGS2  | ENSOARGO0 regulator | <p>miR-194b-5p, miR-101-3p, miR-30b-5p, miR-15a, miR-16a, miR-6119-3p, miR-452-3p, miR-7977, miR-378g, miR-3596, miR-129b-5p, miR-107, miR-96-5p, miR-195a-5p, miR-424-5p, let-7a-2-3p, miR-194a, miR-362-3p, miR-1468, miR-103a-3p, miR-134-3p, miR-103, miR-9788-3p, miR-542-3p, miR-329-3p, miR-194-5p, miR-22-3p, miR-16b, miR-362-3p, miR-2284x, miR-101c, miR-497-5p, miR-1271, miR-16-5p, miR-338-3p, miR-30e-3p, miR-551b-3p, miR-30a-3p, miR-1468-5p, miR-424-5p, miR-15b-5p, miR-877-5p, miR-22-3p, miR-30e-5p, miR-30d-5p, let-7g-3p, miR-329a, miR-30f, miR-671-5p, miR-7144-5p, miR-30a-3p, miR-125a-3p, novel_17, miR-30b, miR-30f, miR-30d, miR-107, miR-30d-3p, miR-1271-5p, miR-15a-5p, miR-322-5p, miR-582-3p, miR-362-3p, miR-30c-5p, miR-30a-5p, let-7a-2-3p, miR-30c, miR-21-3p, miR-154a-3p, miR-370-5p, miR-532-5p, miR-2331-3p, miR-660-5p, miR-15b-5p, miR-6516, miR-544-3p, miR-323-5p, miR-21a-3p, miR-450a-1-3p, miR-1827, miR-345-5p, miR-154b-3p, miR-2330-3p, miR-3074-2-3p, miR-539-5p, miR-6134, miR-338-3p, miR-338-5p, miR-2285j, miR-190a-5p, miR-708-5p, miR-450b-3p, miR-6516-3p, miR-485-3p, miR-487a-3p, miR-15a-5p, miR-140-3p, miR-1197-5p, miR-188-3p, miR-191, miR-2300b-3p, miR-2366, miR-148a-5p, miR-487a, miR-377-5p, miR-345-3p, miR-299-3p, miR-21-3p, miR-760-3p, miR-7977, miR-4792, miR-3064-5p, miR-2284g, miR-27a-3p, miR-1185-2-3p, miR-7857-3p, miR-3082-5p, novel_94, miR-190b-5p, miR-452-5p, miR-154a, miR-1973, miR-107-5p, miR-382-3p, miR-218-5p, miR-3964, miR-154-3p, miR-499a-5p, miR-335, miR-27a-3p, miR-409b, miR-455-3p, miR-148b-5p, miR-1185-3p, miR-3962, miR-484, miR-544a, miR-2284b, miR-1388-3p, miR-494-3p, miR-424-5p, miR-431-5p, miR-103a-2-5p, miR-3085-3p, miR-370-3p, miR-615-5p, miR-1271, miR-487a-3p, miR-488-3p, miR-301, miR-7144-5p, miR-1248, miR-10b-3p, miR-345-5p, miR-16-5p, miR-103b, miR-1306-5p, miR-365a-5p, miR-1260b, miR-370-5p, miR-191-5p, miR-28-5p, miR-138-5p, miR-7641, miR-431, miR-2285ad, miR-299a-3p, miR-450a-1-3p, novel_121, miR-214-5p, miR-322-5p, miR-6516-5p, miR-1343-5p, miR-345-3p, miR-196a-5p, miR-411-3p, miR-3064-5p, miR-200a, miR-28b, miR-3071-3p, miR-1260a, miR-125a-3p, miR-655-5p, miR-323a-5p, miR-299b-3p, miR-150-5p, miR-3065-5p, miR-3591-3p, miR-378b, miR-7975, miR-195a-5p, miR-450b-3p, miR-1193, miR-335-5p, novel_27, miR-374c-5p, miR-2284w, miR-371b-3p, miR-485-3p, miR-16a, miR-502-5p, miR-15a, miR-28c, miR-379-3p, miR-377-5p, miR-544b, miR-185-5p, miR-450c-3p, miR-3071-5p, miR-1285, miR-497-5p, miR-6239, miR-27b-3p, miR-7862, miR-138, miR-1260b, miR-101-5p, let-7f-2-3p, let-7f-2-3p, let-7i, miR-530-3p, miR-345-5p, miR-651-3p, miR-100a, miR-365b-</p> |
| EPHX2 | ENSOARGO0 epoxide   | <p>miR-103a-2-5p, miR-3085-3p, miR-370-3p, miR-615-5p, miR-1271, miR-487a-3p, miR-488-3p, miR-301, miR-7144-5p, miR-1248, miR-10b-3p, miR-345-5p, miR-16-5p, miR-103b, miR-1306-5p, miR-365a-5p, miR-1260b, miR-370-5p, miR-191-5p, miR-28-5p, miR-138-5p, miR-7641, miR-431, miR-2285ad, miR-299a-3p, miR-450a-1-3p, novel_121, miR-214-5p, miR-322-5p, miR-6516-5p, miR-1343-5p, miR-345-3p, miR-196a-5p, miR-411-3p, miR-3064-5p, miR-200a, miR-28b, miR-3071-3p, miR-1260a, miR-125a-3p, miR-655-5p, miR-323a-5p, miR-299b-3p, miR-150-5p, miR-3065-5p, miR-3591-3p, miR-378b, miR-7975, miR-195a-5p, miR-450b-3p, miR-1193, miR-335-5p, novel_27, miR-374c-5p, miR-2284w, miR-371b-3p, miR-485-3p, miR-16a, miR-502-5p, miR-15a, miR-28c, miR-379-3p, miR-377-5p, miR-544b, miR-185-5p, miR-450c-3p, miR-3071-5p, miR-1285, miR-497-5p, miR-6239, miR-27b-3p, miR-7862, miR-138, miR-1260b, miR-101-5p, let-7f-2-3p, let-7f-2-3p, let-7i, miR-530-3p, miR-345-5p, miR-651-3p, miR-100a, miR-365b-</p>                                                                                                                                                                                                                                                                                                                                                                                                                                                                                                                                                                                                                                                                                                                                                                                                                                                                                                                                                                                                                                                                                                                                                                                                                                                                                                                                                                                                                                                                                                                                                                                                                                                                                                                |

miR-493-5p, miR-27a-3p, miR-218-5p, miR-2285y, miR-3059-5p, miR-2285f, miR-1296-5p, miR-361-3p, miR-296-5p, miR-30b-3p, miR-7857, miR-544a, miR-1343-3p, miR-2300a-5p, miR-548w, miR-27a-3p, miR-9788-3p, miR-320b, miR-16b, miR-182-5p, novel\_19, miR-424-5p, miR-30c-1-3p, miR-4532, miR-500a-3p, miR-625-5p, miR-1895, miR-548o-3p, miR-30c-1-3p, miR-2331-3p, miR-182-5p, miR-552-3p, miR-3065-3p, miR-6130, miR-544-3p, miR-15b-5p, miR-22-3p, miR-6516-3p, miR-664a, miR-424-5p, miR-500, miR-4510, miR-129-2-3p, miR-145a-3p, miR-590-3p, miR-191, miR-5703, miR-4429, miR-548e-3p, miR-3960, miR-15a-5p, miR-185-3p, miR-320d, miR-21-3p, miR-503-5p, miR-195a-3p, miR-125b-2-3p, miR-3141, miR-2285ab, miR-107, miR-195a-5p, miR-135b-5p, miR-9851-3p, miR-7-1-3p, miR-29a-3p, miR-320c, miR-144-3p, miR-6529b, miR-502-5p, miR-1247-3p, miR-15a, miR-16a, miR-379-3p, miR-29a, miR-29c-3p, miR-495-3p, miR-3957-3p, miR-371b-3p, miR-1307-3p, miR-22-3p, miR-197-3p, miR-16b, miR-29b, miR-30b-3p, miR-2284x, miR-27b-3p, miR-4508, miR-497-5p, miR-133b-5p, miR-103a-3p, miR-503-5p, miR-185-5p, miR-544b, miR-103, miR-503-5p, miR-3141, miR-493-5p, miR-2285r, miR-331-5p, miR-320a, miR-767, miR-485-5p, miR-574-5p, miR-2285aa, miR-300-3p, novel\_63, miR-2433, miR-29b-3p, miR-3969, miR-135a-5p, miR-144, miR-331-5p, miR-767-5p, miR-191-5p, miR-6128, miR-16-5p, miR-2427, miR-29d-3p, miR-411-3p, miR-2285ad, miR-322-5p, miR-24-2-5p, miR-129-1-3p, miR-6119-5p, miR-30c-2-3p, miR-107, miR-3529-3p, miR-490-3p, miR-1957a, miR-3065-3p, miR-670-3p, miR-499a-3p, miR-7977, miR-2285u, miR-363, miR-6395, miR-335-3p, miR-148a-3p, miR-3141, miR-361-3p, miR-140-5p, miR-2428, miR-326-3p, miR-361-3p, miR-17-3p, miR-541-3p, miR-3059-5p, miR-4726-5p, miR-2285y, miR-2440, miR-1247-3p, miR-2285n, miR-194-3p, miR-185-5p, miR-330-3p, miR-31-5p, miR-188-5p, miR-744-5p, miR-4508, miR-30b-3p, miR-362-3p, miR-30b-3p, miR-3071-5p, miR-125b-2-3p, miR-197-3p, miR-22-3p, miR-541, miR-1843b-5p, miR-329-3p, miR-4532, miR-654-3p, miR-30c-1-3p, miR-6240, miR-130b-5p, miR-214-3p, miR-125a-5p, miR-491-5p, miR-362-3p, miR-330-3p, miR-3141, miR-2957, miR-326, miR-224-5p, miR-324-5p, miR-22-3p, miR-365a-3p, miR-499b-3p, miR-615-5p, miR-125a, miR-140-5p, miR-30c-1-3p, miR-7144-5p, miR-329a, miR-10b-3p, miR-6134, miR-122-5p, miR-224-5p, miR-214, miR-193a-5p, miR-129-2-3p, miR-134-5p, miR-130b-5p, miR-4492, miR-874-5p, miR-129-5p, miR-17-3p, novel\_74, miR-665, miR-125b-5p, miR-324-3p, miR-30a-3p, miR-30e-3p, miR-2433, miR-328-3p, miR-129-1-3p, miR-134-5p, miR-200b, miR-148b-3p, miR-30d-3p, miR-429-3p, miR-2285ad, miR-200b-3p, miR-330-5p, miR-362-3p, miR-134, miR-1271-3p, miR-3956-5p, miR-125b-2-3p, miR-664b-3p, miR-376a-5p, miR-450b-5p, miR-30a-3p, miR-152-3p, novel\_96, miR-3653-3p, miR-200c-3p, miR-760-3p, miR-17-3p, miR-125b, miR-185-3p, miR-30f, miR-30c-2-3p, miR-125a-3p, miR-200c, miR-205-5p, miR-2285af

HOXA10 ENSOARGO( homeobox

CHRNA2 ENSOARGO( choliner.

miR-308b-3p, miR-214-3p, miR-103a-2-5p, novel\_103, miR-1306-5p, miR-326, miR-320b, miR-29b-1-5p, miR-378d, miR-8485, miR-494-3p, miR-101b-3p, miR-124a, miR-744-3p, miR-652-5p, miR-378c, miR-3120-5p, miR-301b-5p, miR-6529a, miR-2284r, miR-378b, miR-216a-3p, miR-500-5p, miR-455-3p, miR-2300a-5p, miR-105-1, miR-27a-3p, miR-181b-2-3p, miR-5010-3p, miR-3968, miR-4726-5p, miR-154-3p, miR-2440, novel\_82, miR-218-5p, miR-107-5p, miR-301a-5p, miR-371a-5p, miR-362-5p, miR-877-3p, miR-361-3p, miR-7705, miR-219a-2-3p, miR-212-3p, miR-2447, miR-452-5p, miR-219a-5p, miR-1296-5p, miR-504, miR-544-5p, miR-361-3p, miR-378j, miR-489, miR-378e, miR-3596, miR-378g, miR-454-5p, miR-27a-3p, miR-2319b, miR-452-3p, miR-3064-5p, miR-7977, miR-99a-3p, miR-760-3p, miR-320d, miR-21-3p, miR-374a-5p, miR-92a-1-5p, miR-345-3p, miR-422a, miR-324-3p, miR-500a-5p, miR-130a-5p, miR-29b-1-5p, miR-143-3p, miR-2424, miR-ADAMTS4 ENSOARGO(ADAM met: 2432, miR-486-3p, miR-2285w, miR-487a, miR-329a-5p, miR-345-3p, miR-4429, miR-378d, miR-664-5p, miR-2300b-3p, miR-2408, miR-193b-5p, miR-378i, miR-378a-3p, miR-1197-5p, miR-188-3p, miR-1193, miR-124-3p, miR-2904, miR-148b-3p, miR-487a-3p, miR-328-3p, miR-532-3p, miR-18a-3p, miR-485-3p, miR-1b-3p, miR-3600, miR-17-3p, miR-6516-3p, miR-708-5p, miR-665, miR-655-3p, miR-320e, miR-29b-2-5p, miR-324-3p, miR-219b-3p, miR-224-5p, miR-3184-3p, miR-4510, miR-3074-5p, miR-378c, miR-214, miR-154b-3p, miR-345-5p, miR-186-5p, novel\_99, miR-582-5p, miR-543-3p, miR-655, miR-129b-3p, miR-216b-5p, miR-6130, miR-582-5p, miR-377-3p, miR-2284s, miR-204-3p, novel\_32, miR-140-5p, miR-378a-3p, miR-504-5p, miR-2331-3p, miR-552-3p, miR-216b-3p, miR-154a-3p, miR-370-5p, miR-378a-5p, miR-124-5p, miR-377-3p, miR-224-5p, novel\_51, miR-2411-3p, miR-105-5p, miR-2285r, miR-345-5p, let-7j, miR-539-3p, miR-382, miR-668-3p, miR-363-5p, miR-1260b, miR-27b-



|        |                     |                                                                                                                                                                                                                                                                                                                                                                                                                                                                                                                                                                                                                                                                                                                                                                                                                                                                                                                                                                                                                                                                                                                                                                                                                                                                                                                                                                                                                         |
|--------|---------------------|-------------------------------------------------------------------------------------------------------------------------------------------------------------------------------------------------------------------------------------------------------------------------------------------------------------------------------------------------------------------------------------------------------------------------------------------------------------------------------------------------------------------------------------------------------------------------------------------------------------------------------------------------------------------------------------------------------------------------------------------------------------------------------------------------------------------------------------------------------------------------------------------------------------------------------------------------------------------------------------------------------------------------------------------------------------------------------------------------------------------------------------------------------------------------------------------------------------------------------------------------------------------------------------------------------------------------------------------------------------------------------------------------------------------------|
|        |                     | miR-125b-5p, miR-2433, miR-29b-3p, miR-138-5p, miR-133a-3p, miR-145a-3p, miR-4510, miR-145-3p, miR-320a, miR-186-5p, miR-133b-3p, let-7g-3p, miR-345-5p, miR-345-5p, miR-339b, miR-2355-5p, miR-125a, miR-874-3p, miR-199a-5p, miR-151b, miR-544-3p, miR-6130, miR-125b, miR-345-3p, miR-339a, miR-6119-5p, novel_127, miR-299-3p, miR-320d, miR-2898, miR-466i-5p, miR-181a-2-3p, miR-4286, miR-183-5p, novel_39, miR-200a, miR-199a-5p, miR-181b-1-3p, miR-125b-2-3p, miR-29d-3p, miR-5703, miR-330-5p, miR-345-3p, miR-2300b-3p, miR-493-3p, miR-19b-3p, miR-4429, novel_79, miR-7641, miR-18a-3p, miR-299a-3p, miR-151-5p, miR-23b-3p, miR-23c, miR-340-5p, miR-107-5p, miR-2285n, miR-576-3p, miR-7134-3p, miR-4726-5p, miR-29a, miR-29c-3p, miR-219b-3p, miR-541-3p, miR-326-3p, miR-199b-5p, miR-2428, miR-150-5p, miR-129b-5p, miR-18a-3p, miR-2387, miR-199b-5p, miR-9851-3p, miR-9-3p, miR-1291, miR-19a-3p, miR-320c, miR-677, miR-4443, miR-181b-3p, novel_69, miR-299b-3p, miR-29a-3p, miR-330-3p, miR-2411-3p, novel_51, miR-320b, novel_115, miR-326, miR-125a-5p, miR-199b-5p, miR-103a-2-5p, novel_124, miR-25-5p, miR-363-5p, miR-23a-3p, let-7c-3p, miR-6240, miR-345-5p, miR-432-3p, miR-432-3p, miR-30b-3p, miR-125b-2-3p, miR-541, miR-101c, miR-16-2-3p, miR-29b, miR-138, miR-30b-3p, miR-544a, miR-339-5p, miR-181b-2-3p, miR-1343-3p, miR-330-3p, miR-9788-3p, miR-194-3p, miR-544b, miR-147a |
| PTK2B  | ENSOARGO( protein   |                                                                                                                                                                                                                                                                                                                                                                                                                                                                                                                                                                                                                                                                                                                                                                                                                                                                                                                                                                                                                                                                                                                                                                                                                                                                                                                                                                                                                         |
|        |                     | miR-874-5p, miR-22-5p, miR-103a-2-5p, miR-450a-2-3p, miR-132-5p, miR-107-5p, miR-1271-3p, miR-877-3p, miR-628-5p, miR-26b-3p, miR-3059-5p                                                                                                                                                                                                                                                                                                                                                                                                                                                                                                                                                                                                                                                                                                                                                                                                                                                                                                                                                                                                                                                                                                                                                                                                                                                                               |
| CERS3  | ENSOARGO( ceramide  |                                                                                                                                                                                                                                                                                                                                                                                                                                                                                                                                                                                                                                                                                                                                                                                                                                                                                                                                                                                                                                                                                                                                                                                                                                                                                                                                                                                                                         |
|        |                     | miR-128-3p, miR-1895, miR-615, miR-296-5p, miR-615-3p, miR-216a-3p, miR-371b-3p, miR-3957-3p                                                                                                                                                                                                                                                                                                                                                                                                                                                                                                                                                                                                                                                                                                                                                                                                                                                                                                                                                                                                                                                                                                                                                                                                                                                                                                                            |
| DNAJC5 | ENSOARGO( DnaJ (Hs: |                                                                                                                                                                                                                                                                                                                                                                                                                                                                                                                                                                                                                                                                                                                                                                                                                                                                                                                                                                                                                                                                                                                                                                                                                                                                                                                                                                                                                         |
|        |                     | let-7d, miR-582-3p, miR-378d, miR-1961, miR-134, miR-140-3p, miR-222-5p, miR-505-5p, miR-545-5p, miR-134-5p, miR-106a, miR-2285ad, miR-1b-3p, let-7f-5p, miR-6536, miR-98-5p, miR-106a, miR-21-3p, let-7k, miR-2285af, let-7c-5p, miR-122-3p, miR-130a-5p, miR-2478, miR-664b-3p, miR-192-3p, miR-3065-3p, let-7g, miR-2432, miR-486-3p, miR-3529-3p, miR-345-3p, miR-20a, miR-20b-5p, miR-21a-3p, miR-3154, miR-93-5p, miR-301a-3p, miR-300-3p, let-7i-5p, novel_32, miR-574-5p, miR-2331-3p, miR-3065-3p, miR-21-3p, miR-134-5p, miR-486b-3p, miR-454-3p, let-7f, miR-665, miR-331-3p, miR-93, let-7b-5p, miR-                                                                                                                                                                                                                                                                                                                                                                                                                                                                                                                                                                                                                                                                                                                                                                                                        |
| TRIM35 | ENSOARGO( triparti  |                                                                                                                                                                                                                                                                                                                                                                                                                                                                                                                                                                                                                                                                                                                                                                                                                                                                                                                                                                                                                                                                                                                                                                                                                                                                                                                                                                                                                         |
|        |                     | 3074-5p, let-7b, miR-1306-5p, miR-3074-2-3p, miR-450b-5p, miR-1839-5p, miR-542-3p, miR-484, miR-125b-2-3p, miR-3071-5p, let-7g-5p, miR-20b, miR-421, miR-149-5p, miR-9788-3p, miR-1343-3p, novel_78, miR-130a-3p, miR-130b-3p, miR-378a-5p, let-7e, novel_103, miR-1306-5p, miR-106b-5p, novel_51, miR-106a-5p, miR-505, miR-2957, miR-106a-5p, let-7a-5p, miR-2483-5p, miR-363-5p, let-7e-5p, miR-3065-5p, miR-3591-3p, miR-150-5p, miR-1306, let-7d-5p, miR-3074-5p, miR-2319b, miR-499b-5p, miR-7689-3p, novel_1, miR-2285t, miR-20a-5p, miR-133a-5p, novel_82, let-7i, miR-2285y, miR-24-3p, miR-301b-3p, miR-3059-5p, miR-495-3p                                                                                                                                                                                                                                                                                                                                                                                                                                                                                                                                                                                                                                                                                                                                                                                   |
|        |                     | miR-495-3p, miR-625-5p, miR-362-3p, miR-329a, miR-6536, miR-                                                                                                                                                                                                                                                                                                                                                                                                                                                                                                                                                                                                                                                                                                                                                                                                                                                                                                                                                                                                                                                                                                                                                                                                                                                                                                                                                            |
| DYRK4  | ENSOARGO( dual-spe  |                                                                                                                                                                                                                                                                                                                                                                                                                                                                                                                                                                                                                                                                                                                                                                                                                                                                                                                                                                                                                                                                                                                                                                                                                                                                                                                                                                                                                         |
|        |                     | 362-3p, miR-338-5p, miR-329-3p, miR-503-3p, miR-2332, miR-362-3p                                                                                                                                                                                                                                                                                                                                                                                                                                                                                                                                                                                                                                                                                                                                                                                                                                                                                                                                                                                                                                                                                                                                                                                                                                                                                                                                                        |

SLC43A1 ENSOARGO(solute c.

miR-671-5p, miR-3154, novel\_32, novel\_25, miR-15b-5p, miR-132-5p, miR-365a-3p, miR-125a, miR-615-5p, miR-874-5p, miR-708-5p, miR-424-5p, miR-204-5p, miR-486b-3p, miR-28-5p, miR-664a, miR-331-3p, miR-6740-5p, miR-125b-5p, miR-29b-2-5p, miR-320e, miR-665, miR-1306-3p, miR-135a-1-3p, miR-3184-5p, miR-1197-3p, miR-16-5p, miR-1271, miR-1306-5p, novel\_42, miR-145a-3p, miR-133a-3p, miR-2284u, miR-33b-3p, miR-184-3p, miR-2904, miR-188-3p, miR-23b-5p, miR-5703, miR-2366, miR-2300b-3p, miR-532-3p, novel\_83, miR-1247-5p, miR-505-5p, miR-322-5p, miR-1271-5p, miR-15a-5p, miR-1224-5p, miR-212-5p, miR-107, miR-543-5p, miR-450a-2-3p, miR-127-5p, miR-216a-5p, miR-125b, miR-2285af, miR-210-5p, novel\_39, miR-486-3p, miR-2284y, miR-2284a, miR-450c-5p, miR-2285b, miR-29b-1-5p, miR-29b-2-5p, miR-1983, miR-195a-5p, miR-96-5p, miR-147-3p, miR-1291, miR-107, miR-668-5p, miR-412-3p, miR-1306-3p, miR-361-3p, miR-2387, miR-6535, miR-378g, miR-3082-5p, miR-211-5p, miR-7977, miR-2284g, miR-128-1-5p, miR-450a-5p, miR-16a, miR-15a, miR-4324, miR-423-5p, miR-361-3p, miR-211, miR-24-3p, miR-371b-3p, miR-3957-3p, novel\_101, miR-3059-5p, miR-497-5p, miR-2889, miR-16b, miR-2426, miR-296-5p, miR-7b-5p, miR-1843b-5p, miR-9788-3p, miR-421, miR-103, miR-185-5p, miR-134-3p, novel\_78, novel\_4, miR-103a-3p, miR-125a-5p, miR-3955-3p, miR-29b-1-5p, miR-16b, novel\_51, miR-7-5p, miR-296-3p, miR-296-3p, miR-363-5p, miR-2284b, miR-628-5p, miR-424-5p

miR-18b-5p, miR-412, miR-423-3p, miR-299a-3p, miR-2285ad, miR-214-5p, miR-2284z, miR-450a-1-3p, miR-483-3p, miR-758-5p, miR-378h, miR-330-5p, miR-1343-5p, miR-3578, miR-1290, miR-615-3p, miR-99a-5p, miR-30a-3p, miR-29b-2-5p, miR-490-3p, miR-2284a, miR-2284y, miR-99a, miR-125a-3p, miR-1260a, novel\_96, miR-543-5p, miR-152-3p, miR-191-3p, miR-17-3p, miR-2898, miR-370-3p, miR-2355-5p, miR-300-3p, miR-18a, miR-17-5p, miR-100-5p, miR-320a, miR-93-5p, miR-485-5p, miR-1814c, miR-20b-5p, miR-7144-5p, miR-345-5p, miR-2474, miR-6128, miR-365a-5p, miR-378c, miR-1260b, miR-93, miR-135a-5p, miR-100-3p, miR-592, miR-377-5p, miR-26b-3p, miR-130a-3p, miR-20b, miR-194-3p, miR-185-5p, miR-134-3p, miR-3431, miR-412-5p, miR-450c-3p, miR-1843b-5p, miR-542-3p, miR-873a-5p, miR-744-5p, miR-2889, miR-7862, miR-1260b, miR-3432b, miR-2483-5p, miR-345-5p, miR-106a-5p, miR-99a-5p, miR-2331-5p, miR-17-5p, miR-365b-5p, miR-197-5p, miR-3141, miR-146a, miR-1343-5p, miR-378a-5p, miR-483-3p, miR-655-5p, miR-3074-5p, miR-6535, miR-320c, miR-669, miR-299b-3p, miR-670-3p, miR-3141, miR-148a-3p, miR-18b, miR-378f, miR-135b-5p, miR-146b-5p, miR-2285k, miR-412-3p, miR-17-3p, miR-301b-3p, miR-326-3p, miR-371b-3p, miR-1307-3p, miR-211, miR-6529b, miR-20a-5p, miR-199c, miR-502b, miR-22-5p, miR-30d-3p, miR-106a, miR-151-5p, miR-532-3p, miR-148b-3p, miR-383-5p, miR-378a-3p, miR-1197-5p, miR-5703, miR-2408, miR-378i, miR-2284u, miR-4429, miR-19b-3p, miR-493-3p, miR-20a, miR-5100, miR-146a-5p, miR-377-5p, miR-2285i, miR-185-3p, miR-92a-1-5p, miR-422a, miR-324-3p, miR-2285p, novel\_17, miR-2484, miR-299-3p, miR-3653-3p, miR-466i-5p, miR-320d, miR-106a, miR-296-3p, miR-378a-3p, miR-877-5p, miR-151b, novel\_32, miR-301a-3p, miR-450a-1-3p, miR-1827, miR-1895, miR-625-5p, miR-345-5p, miR-18a-5p, miR-665-5p, miR-3074-5p, miR-145a-3p, miR-530-

miR-544b, novel\_116, miR-6238, miR-411-5p, miR-194-3p, miR-432-5p, miR-2284d, miR-412-5p, miR-377-5p, miR-2284x, miR-1260b, miR-2284ab, miR-29b, miR-30b-3p, novel\_23, miR-145a-5p, miR-542-3p, miR-1843b-5p, miR-223-3p, miR-432, miR-653, miR-19b-2-5p, let-7a-2-3p, miR-345-5p, let-7j, miR-2284l, miR-668-3p, miR-493-5p, miR-130b-5p, miR-466f-3p, miR-483-3p, miR-2411-3p, miR-669, miR-299b-3p, novel\_69, miR-29a-3p, novel\_68, miR-19a-3p, miR-412-3p, miR-410-5p, miR-216a-3p, miR-3065-5p, miR-150-5p, miR-2285ab, miR-2428, miR-2284w, novel\_27, miR-374c-5p, miR-24-3p, miR-211, miR-29c-3p, miR-17-3p, miR-495-3p, miR-2285x, miR-335-5p, miR-147-5p, miR-203b-5p, miR-379-3p, miR-29a, novel\_1, miR-502-5p, miR-4324, miR-486-5p, miR-2284z, miR-582-3p, miR-483-3p, miR-6516-5p, miR-9-5p, miR-412, miR-429-3p, miR-299a-3p, miR-496, let-7a-2-3p, miR-128-3p, miR-200b-3p, miR-582-3p, miR-411-3p, miR-29d-3p, miR-3578, miR-345-3p, miR-3591-5p, miR-2284a, miR-490-3p, miR-1271-3p, miR-2285b, novel\_39, miR-376b-5p, miR-376c-5p, miR-29a-5p, miR-2284y, miR-2478, miR-450b-5p, miR-3064-5p, miR-30a-3p, miR-3529-3p, miR-200a-3p, miR-200c-3p, miR-450a-2-3p, miR-28-3p, miR-17-3p, miR-30c-2-3p, miR-200c, miR-2285af, miR-1260a, miR-2284n, miR-223-5p, miR-769, miR-374c-3p, miR-141-3p, miR-2285aa, miR-503-3p, miR-1814c, miR-1248, miR-23a-5p, miR-345-5p, let-7g-3p, miR-23b, miR-200a-5p, miR-381-3p, miR-1260b, miR-2284v, miR-28a-3p, miR-204-5p, miR-409-3p, novel\_63, miR-29b-3p, miR-2284k, miR-216a-3p, miR-148b-5p, miR-145b, miR-151a-3p, miR-2284aa, miR-450b-5p, miR-544a, miR-101a-5p, miR-2426, miR-30b-3p, miR-7857, miR-412-3p, miR-541, miR-484, miR-2310, miR-8485, miR-30c-1-3p, miR-2284b, miR-23a-3p, miR-101b-3p, miR-3085-3p, miR-2957, novel\_115, miR-4443, miR-454-5p, miR-3082-5p, miR-3596, miR-211-5p, miR-2285u, miR-3064-5p, miR-1983, miR-193-

miR-2478, miR-192-3p, miR-1957a, miR-199a-5p, miR-3529-3p, miR-2385-3p, miR-181b-5p, miR-6536, miR-2898, miR-17-3p, miR-8117, miR-125a-3p, miR-6119-5p, miR-378h, miR-1271-5p, miR-322-5p, miR-582-3p, miR-18b-5p, miR-412, miR-885-3p, miR-1290, miR-23b-5p, miR-330-5p, miR-218-2-3p, miR-500b-5p, miR-378c, miR-2284v, miR-16-5p, novel\_9, miR-370-5p, miR-5100, miR-2433, novel\_63, miR-2284k, miR-331-3p, miR-769, miR-374c-3p, miR-199a-5p, miR-223-5p, miR-2285aa, miR-876-3p, miR-1248, miR-485-5p, miR-3154, miR-18a, miR-362-5p, miR-654-3p, miR-432-3p, miR-539-3p, miR-130b-5p, miR-628-5p, miR-466f-3p, miR-377-3p, miR-503-5p, miR-7-5p, novel\_51, miR-134-3p, miR-503-5p, miR-2284d, miR-412-5p, novel\_116, miR-31-5p, miR-26b-3p, miR-16-1-3p, miR-30b-3p, miR-16b, miR-2284ab, miR-188-5p, miR-7862, miR-497-5p, miR-7b-5p, miR-181a-5p, miR-542-3p, miR-374b-3p, novel\_23, miR-323c, miR-199b-5p, miR-2428, miR-2284w, miR-326-3p, miR-335-5p, miR-219b-3p, miR-17-3p, miR-1193, miR-6119-3p, miR-199c, miR-22-5p, miR-502-5p, miR-15a, miR-4324, novel\_87, miR-16a, miR-374c-3p, miR-329-5p, novel\_68, miR-19a-3p, miR-378f, miR-195a-5p, miR-18b, miR-125b-2-3p, miR-664b-3p, miR-503-5p, miR-216c-5p, miR-329a-5p, miR-2284m, miR-3653-3p, novel\_17, miR-422a, miR-92a-1-5p, miR-500a-5p, miR-15a-5p, miR-7859, miR-487a-3p, miR-548e-3p, miR-485-3p, miR-212-5p, miR-1b-3p, miR-184-3p, miR-19b-3p, miR-493-3p, miR-148a-5p, miR-664-5p, miR-16-1-3p, miR-218-1-3p, miR-1246, miR-2300b-3p, miR-378i, miR-378a-3p, miR-1193, miR-5703, miR-2904, miR-346, miR-769-5p, miR-338-3p, miR-181c-5p, miR-145a-3p, miR-378c, miR-425-5p, miR-2330-3p, miR-1271, miR-17-3p, miR-130b-5p, miR-129-5p, miR-4492, miR-424-5p, miR-2285j, miR-377-3p, miR-15b-5p, miR-204-3p, miR-378a-3p, miR-552-3p, miR-296-3p, miR-370-5p, miR-18a-5p, novel\_99, miR-1827, miR-186-5p, miR-543-3p, miR-885-3p, miR-3591-3p, miR-330-3p, miR-21-3p, miR-129-5p, miR-330-3p, miR-6240, miR-32-3p, miR-32-3p, miR-3074-2-3p, miR-1224-5p, miR-5010-3p, miR-21-3p, miR-323-3p

miR-378b, miR-299b-3p, miR-669, miR-148a-3p, miR-2319a, miR-135a-2-3p, miR-2285x, miR-326-3p, miR-199b-5p, miR-301b-3p, miR-2428, miR-576-3p, miR-147-5p, miR-3955-5p, miR-133b-5p, miR-130a-3p, miR-185-5p, miR-873a-5p, miR-7b-5p, miR-1285, miR-1434-3p, miR-145a-5p, miR-30b-3p, miR-138, miR-654-3p, miR-345-5p, miR-7-5p, miR-1343-5p, miR-2285aa, miR-769, miR-199a-5p, miR-324-5p, miR-154b-5p, miR-30e-5p, miR-488-3p, miR-424-3p, miR-200a-5p, miR-3154, miR-345-5p, miR-3607-3p, novel\_63, miR-138-5p, miR-299a-3p, miR-1224-5p, miR-758-5p, miR-6516-5p, miR-129-1-3p, miR-345-3p, miR-1343-5p, miR-330-5p, miR-30a-5p, miR-3529-3p, miR-3064-5p, miR-199a-5p, miR-3065-3p, miR-2285af, miR-125a-3p, miR-6119-5p, miR-543-5p, miR-152-3p, miR-4792, miR-3064-5p, miR-499b-5p, miR-2483-3p, miR-1185-2-3p, miR-361-3p, miR-199b-5p, novel\_94, miR-101-3p, miR-769-5p, miR-301a-5p, miR-1343-3p, miR-145b, miR-147a, miR-9788-3p, miR-1185-3p, miR-484, miR-301b-5p, miR-30b-3p, miR-125b-2-3p, miR-124a, miR-1388-3p, miR-2330-5p, miR-193a, miR-326, miR-3085-3p, miR-130b-3p, miR-199b-5p, miR-2331-3p, miR-21-3p, miR-3065-3p, miR-296-3p, miR-6516, miR-6130, miR-216b-5p, miR-21a-3p, miR-129b-3p, miR-433-3p, miR-30d-5p, miR-30f, miR-345-5p, miR-1895, miR-4510, miR-129-2-3p, miR-3184-3p, miR-769-5p, miR-346, miR-338-3p, miR-6134, miR-2285j, miR-19b-1-5p, miR-3604, miR-665, miR-454-3p, miR-548e-3p, miR-7859, miR-148b-3p, miR-2408, miR-124-3p, miR-140-3p, miR-5703, miR-184-3p, miR-218-1-3p, miR-345-3p, miR-143-3p, miR-324-3p, miR-345-3p, miR-466i-5p, miR-30d, miR-30b-3p, miR-21-3p, miR-299-3p

miR-145a-3p, miR-2284v, miR-346, miR-2284k, miR-6740-5p, miR-4492, miR-30c-1-3p, miR-140-5p, miR-2355-5p, miR-2284n, miR-411, miR-1827, miR-148b-5p, miR-2284y, miR-2284a, miR-30c-2-3p, miR-185-3p, miR-2284m, miR-21-3p, novel\_96, miR-485-3p, miR-487a-3p, miR-483-3p, miR-758-5p, novel\_83, miR-3578, miR-2300b-3p, miR-124-3p, miR-5703, miR-411-3p, miR-128-3p, miR-218-1-3p, miR-2284u, miR-148a-5p, miR-6527, miR-2284j, miR-2428, miR-2440, miR-485-3p, miR-379-3p, miR-22-5p, miR-363, miR-2284g, miR-7857-3p, novel\_69, miR-216a-3p, miR-124a, miR-6240, miR-23a-3p, miR-668-3p, miR-2284b, miR-30c-1-3p, miR-503-3p, miR-330-3p, miR-491-5p, miR-483-3p, miR-378a-5p, miR-31-5p, miR-330-3p, novel\_78, miR-432-5p, miR-2284d, miR-185-5p, miR-147a, miR-216a-3p, miR-148b-5p, miR-432, miR-1434-3p, miR-2284ab, miR-2284x

miR-30f, miR-455-5p, miR-224-5p, miR-377-3p, let-7c-3p, miR-2285w, miR-200a, miR-148b-5p, miR-145a-5p, miR-301b-5p, miR-218-1-3p, miR-455-5p, miR-450b-5p, miR-3600, miR-145b, miR-548e-3p, miR-2284h-5p, miR-7859, miR-758-5p, miR-3604, miR-301a-5p, miR-382-3p, miR-218-5p, miR-101-3p, miR-129-5p, miR-3059-5p, miR-4510, miR-122-5p, miR-374c-5p, miR-224-5p, miR-129b-3p, miR-433-3p, miR-1814c, miR-541-5p, miR-363, miR-548o-3p, miR-3068-3p, miR-377-3p, miR-300-3p, miR-6130

DPYSL2 ENSOARGOC dihydrop

SH3BGR ENSOARGOC SH3 doma

SMCHD1 ENSOARGOC structur

|        |                    |                                                                                                                                                                                                                                                                                                                                                                                                                                                                                                                                                                                                                                                                                                                                                                                                                                                                                                                                                                                                                                                                                                                                                                                                                                                                                                                                                                                                                                                                                                                                                                                                                                                                                                                                                                                                                                                                                                 |
|--------|--------------------|-------------------------------------------------------------------------------------------------------------------------------------------------------------------------------------------------------------------------------------------------------------------------------------------------------------------------------------------------------------------------------------------------------------------------------------------------------------------------------------------------------------------------------------------------------------------------------------------------------------------------------------------------------------------------------------------------------------------------------------------------------------------------------------------------------------------------------------------------------------------------------------------------------------------------------------------------------------------------------------------------------------------------------------------------------------------------------------------------------------------------------------------------------------------------------------------------------------------------------------------------------------------------------------------------------------------------------------------------------------------------------------------------------------------------------------------------------------------------------------------------------------------------------------------------------------------------------------------------------------------------------------------------------------------------------------------------------------------------------------------------------------------------------------------------------------------------------------------------------------------------------------------------|
| NDUFS2 | ENSOARGO(NADH deh) | <p>miR-340-3p, miR-548e-3p, miR-2285ad, novel_4, miR-1343-3p, miR-339-5p, novel_79, miR-7859, miR-450a-1-3p, miR-2284h-5p, miR-345-3p, miR-615-3p, miR-450c-3p, miR-22-3p, miR-140-3p, miR-1197-5p, miR-21b, miR-363-5p, miR-376a-5p, miR-8485, miR-200a, miR-143-3p, miR-505, miR-324-3p, miR-2411-3p, miR-185-3p, miR-339a, miR-345-3p, miR-2898, miR-200a-3p, miR-466f-3p, miR-2319b, miR-3074-5p, miR-141-3p, miR-3082-5p, novel_32, miR-22-3p, miR-204-3p, miR-6535, miR-450a-1-3p, miR-378b, miR-339b, miR-625-5p, miR-6516-3p, miR-2447, miR-3074-5p, miR-3957-3p, miR-1296-5p, miR-495-3p, miR-6525, miR-423-5p, miR-3184-5p, miR-615, miR-6740-5p, miR-324-3p, miR-2285y, miR-450b-3p, miR-4726-5p, miR-128-1-5p</p> <p>miR-34b-5p, miR-214-3p, miR-543-5p, novel_96, miR-3085-3p, miR-491-5p, miR-324-3p, miR-2331-5p, miR-194a, miR-92a-1-5p, miR-326, novel_39, miR-486-3p, miR-432-3p, miR-3064-5p, miR-34a-5p, miR-2889, miR-2904, miR-22-3p, miR-330-5p, miR-188-3p, miR-194-5p, miR-3591-5p, miR-3578, miR-149-5p, miR-532-3p, miR-203b-5p, miR-486b-3p, miR-4726-5p, miR-324-3p, miR-34c, miR-326-3p, miR-449a, miR-361-3p, miR-24-3p, miR-194b-5p, miR-214, miR-2447, miR-1291, miR-2474, miR-204-3p, miR-22-3p, miR-34c-5p, miR-34b, miR-615-5p, miR-296-3p, miR-3064-5p</p>                                                                                                                                                                                                                                                                                                                                                                                                                                                                                                                                                                                                 |
| LIMK2  | ENSOARGO(LIM doma) | <p>miR-3600, miR-616-3p, miR-151-5p, miR-383-5p, miR-23b-3p, miR-23c, miR-340-5p, miR-140-3p, miR-1197-5p, miR-5703, novel_133, miR-218-1-3p, miR-378d, miR-148a-5p, miR-34a-5p, miR-33b-3p, miR-4429, miR-329a-5p, miR-2424, miR-2432, miR-143-3p, miR-181b-1-3p, miR-377-5p, miR-345-3p, miR-185-3p, miR-92a-1-5p, miR-2285p, miR-34b-5p, miR-221-5p, miR-320d, miR-760-3p, miR-21-3p, miR-532-5p, miR-296-3p, miR-2331-3p, miR-30c-1-3p, miR-221-5p, miR-504-5p, miR-204-3p, miR-151b, miR-377-3p, miR-499b-3p, miR-139-5p, miR-6130, miR-433-3p, miR-21a-3p, miR-450a-1-3p, miR-1827, let-7g-3p, miR-18a-5p, miR-4510, miR-129-2-3p, miR-338-3p, miR-769-5p, miR-6525, miR-19b-1-5p, miR-151-3p, miR-338-5p, miR-665, miR-2285j, miR-208b-5p, miR-4492, novel_74, miR-450b-3p, miR-17-3p, miR-5010-3p, miR-181b-2-3p, miR-105-1, novel_4, novel_78, miR-1343-3p, miR-151a-3p, miR-148b-5p, miR-1298-3p, miR-30b-3p, miR-2284r, miR-1839-5p, miR-21b, miR-101c, miR-2426, miR-450b-5p, miR-101a-5p, let-7c-3p, miR-33a-5p, miR-101b-3p, miR-1839-3p, miR-30c-1-3p, miR-2957, miR-320b, miR-326, miR-431-5p, miR-1185-5p, miR-3085-3p, miR-3955-3p, miR-499b-5p, miR-211-5p, miR-3064-5p, miR-139-5p, miR-24-1-5p, miR-20a-3p, miR-452-3p, miR-499a-3p, miR-25, miR-378g, miR-3596, miR-129b-5p, miR-361-3p, miR-335-3p, miR-877-3p, miR-1983, miR-136-5p, miR-504, miR-6527, miR-9-5p, miR-452-5p, miR-3059-5p, miR-2447, miR-877-3p, miR-361-3p, miR-769-5p, miR-101-3p, miR-2440, miR-3964, miR-490-5p, miR-2285t, miR-335, miR-18b-5p, miR-431, miR-6517, miR-134-5p, miR-450a-1-3p, miR-545-5p, miR-129-1-3p, miR-214-5p, miR-505-5p, miR-9-5p, miR-2427, miR-29d-3p, miR-23b-5p, miR-330-5p, miR-345-3p, miR-134, miR-105-2, miR-300, miR-3064-5p, miR-181a-2-3p, miR-376c-5p, novel_39, miR-1957a, miR-376b-5p, miR-1271-3p, miR-28b, miR-24-2-5p, miR-148b-5p, miR-30c-2-3p, miR-</p> |
| ADAL   | ENSOARGO(adenosin) | <p>miR-1271-3p, miR-28b, miR-24-2-5p, miR-148b-5p, miR-30c-2-3p, miR-</p>                                                                                                                                                                                                                                                                                                                                                                                                                                                                                                                                                                                                                                                                                                                                                                                                                                                                                                                                                                                                                                                                                                                                                                                                                                                                                                                                                                                                                                                                                                                                                                                                                                                                                                                                                                                                                       |

miR-29d-3p, miR-34b-3p, let-7a-2-3p, miR-10a-5p, miR-10b-2, miR-200b-3p, let-7d, miR-411-3p, miR-545-5p, miR-483-3p, let-7c-5p, miR-200c, miR-6119-5p, miR-376b-3p, miR-2285af, miR-200c-3p, miR-181b-5p, miR-2898, miR-17-3p, miR-29b-2-5p, miR-3529-3p, miR-490-3p, miR-199a-5p, miR-17-5p, miR-320a, miR-3154, miR-1814c, let-7g-3p, miR-141-3p, miR-370-3p, miR-487a-3p, miR-199a-5p, miR-374c-3p, miR-135a-5p, miR-409-3p, miR-331-3p, miR-2332, miR-29b-3p, miR-28-5p, miR-486b-3p, miR-767-5p, miR-6128, miR-145-3p, miR-93, miR-1434-3p, miR-181a-5p, miR-653, miR-30b-3p, miR-29b, miR-26b-3p, miR-20b, miR-544b, miR-185-5p, let-7g-5p, miR-432-5p, miR-2285g, miR-17-5p, miR-106a-5p, miR-224-5p, miR-466f-3p, miR-660, miR-382, miR-345-5p, miR-539-3p, miR-376b-3p, miR-378b, miR-135b-5p, miR-505-3p, miR-195a-5p, miR-1291, miR-450b-3p, miR-7-1-3p, miR-10a-5p, miR-320b, miR-29a-3p, miR-670-3p, miR-146b-3p, miR-2404, let-7i, miR-16a, miR-6402, miR-20a-5p, miR-15a, miR-199c, novel\_1, miR-17-3p, miR-2285x, miR-3959-3p, miR-188-3p, miR-140-3p, miR-1246, novel\_133, miR-378d, miR-4429, miR-505-3p, miR-485-3p, miR-548e-3p, miR-200b, miR-15a-5p, miR-487a-3p, miR-21-3p, miR-30b-3p, miR-1277-5p, miR-320d, miR-106a, miR-20a, miR-216c-5p, miR-2432, miR-125b-2-3p, miR-21a-3p, novel\_99, miR-154b-3p, miR-21-3p, miR-660-5p, miR-140-5p, miR-6130, miR-544-3p, miR-29b-2-5p, miR-320e, miR-708-5p, miR-424-5p, miR-17-3p, miR-6516-3p, miR-450b-3p, miR-425-5p, miR-3074-2-3p, miR-2330-3p, miR-145a-3p, miR-4510, miR-6134, let-7b-5p, miR-206-3p, miR-10b-5p, miR-125b-2-3p, miR-30b-3p, miR-412-3p, miR-7857, miR-143-5p, miR-10b, miR-2284aa, miR-101a-5p, miR-544a, miR-2426, miR-27a-3p, miR-151a-3p, miR-105-1, miR-9788-3p, novel\_103, miR-1306-5p, miR-320b, let-7e, miR-25-5p, miR-3085-3p, miR-424-5p, miR-106a-5p, let-7a-5p, miR-129b-5p, miR-109b-5p, miR-361-



miR-582-5p, miR-877-5p, miR-5480-3p, miR-32-5p, miR-2331-3p, miR-339b, let-7g-3p, miR-186-5p, miR-582-5p, miR-1827, miR-543-3p, let-7f-1-3p, miR-21a-3p, miR-411, miR-30d-5p, miR-27b-5p, miR-6525, miR-539-5p, miR-487a-5p, miR-208b-5p, miR-30e-3p, miR-29b-2-5p, miR-369-5p, miR-30a-3p, miR-148b-3p, miR-340-5p, miR-23c, miR-23b-3p, miR-4429, miR-1246, novel\_133, miR-5703, miR-125b-2-3p, miR-130a-5p, miR-421-5p, miR-329a-5p, miR-760-3p, miR-320d, miR-3653-3p, miR-618, miR-345-3p, miR-1185-2-3p, miR-27a-3p, miR-20a-3p, miR-664b, miR-126b-5p, miR-668-5p, miR-99b-5p, miR-9-3p, miR-544-5p, miR-493-5p, miR-381-3p, miR-877-3p, miR-212-3p, miR-363-3p, miR-452-5p, miR-335, miR-2284q, miR-101-3p, novel\_82, miR-107-5p, miR-1185-3p, miR-2459, miR-126a-5p, miR-9788-3p, miR-455-3p, miR-105-1, miR-1343-3p, miR-27a-3p, miR-145b, miR-299a-5p, miR-101a-5p, miR-101c, miR-6529a, miR-30b-3p, miR-412-3p, miR-1b-5p, miR-101b-3p, miR-382-3p, miR-376b, miR-23a-3p, miR-103a-2-5p, miR-326, miR-320b, miR-25-3p, miR-365a-3p, miR-154b-5p, miR-223-5p, miR-141-3p, miR-329b, let-7g-3p, miR-767, miR-1248, miR-503-3p, miR-331-5p, miR-488-3p, miR-30e-5p, miR-23b, miR-320a, miR-100-5p, miR-3154, miR-323-3p, miR-6128, miR-331-5p, miR-767-5p, miR-5100, miR-29b-3p, miR-135a-5p, miR-6740-5p, novel\_121, novel\_79, miR-412, let-7a-2-3p, miR-105-2, miR-99a-5p, miR-345-3p, miR-330-5p, miR-30a-5p, miR-29d-3p, miR-92b-3p, miR-2285b, miR-1957a, novel\_39, miR-29b-2-5p, miR-30a-3p, miR-92a-3p, miR-200a-3p, miR-152-3p, miR-107, miR-664-3p, miR-99a, miR-2285af, miR-339a, miR-30f, miR-29a-3p, miR-670-3p, miR-2404, miR-320c, miR-329-5p, novel\_68, miR-3120-3p, miR-655-5p, miR-107, miR-135b-5p, miR-2319a, miR-148a-3p, miR-3065-5p, miR-3970, miR-2284w, miR-2285m, miR-2428, miR-326-3p, miR-2285r, miR-345-3p, miR-503-5p, miR-493-5p, miR-503-5p, novel\_17, novel\_121, miR-7859, miR-503-5p, miR-134-3p, miR-6516-5p, miR-212-5p, miR-181b-2-3p, miR-548e-3p, miR-1343-3p, miR-450b-5p, miR-582-3p, miR-1434-5p, miR-145-3p, miR-211, miR-323c, miR-3074-2-3p, miR-500, miR-2284q, miR-204-5p, novel\_1, miR-2285n, miR-677, miR-378g, miR-6516, miR-211-5p, miR-216b-3p, miR-493-5p, miR-1827, novel\_99, let-7g-3p, miR-2312, miR-500a-3p, miR-381-3p, miR-381-3p

REV3L

ENSOARGO(C REV3-lik

MITF

ENSOARGO(microph

miR-484, miR-2284r, miR-296-5p, miR-541, miR-10b, miR-30b-3p, miR-544a, miR-199b-3p, novel\_4, novel\_78, miR-2300a-5p, miR-330-3p, miR-145b, miR-147a, miR-9788-3p, miR-421, miR-2459, miR-1306-5p, novel\_103, miR-505, miR-16b, miR-491-5p, miR-3955-3p, miR-214-3p, miR-574-3p, miR-124a, miR-424-5p, miR-2330-5p, miR-8485, miR-2310, miR-140-5p, miR-361-3p, miR-147-3p, miR-504, miR-668-5p, miR-1983, miR-664b, miR-20a-3p, miR-499b-5p, miR-378g, miR-203-3p, novel\_82, miR-2440, miR-2285y, miR-4726-5p, miR-3968, miR-2447, miR-541-3p, miR-877-3p, miR-361-3p, miR-423-5p, miR-2300b-3p, miR-2366, miR-124-3p, miR-1193, miR-493-3p, miR-18a-3p, miR-1b-3p, miR-15a-5p, miR-328-3p, miR-196a-3p, miR-210-5p, miR-324-3p, miR-185-3p, miR-345-3p, miR-760-3p, miR-221-5p, miR-3653-3p, miR-21-3p, miR-299-3p, miR-345-3p, miR-2432, miR-486-3p, miR-380-3p, miR-339b, miR-625-5p, novel\_99, miR-1827, miR-221-5p, miR-504-5p, miR-2331-3p, miR-3065-3p, miR-296-3p, miR-552-3p, miR-544-3p, miR-10a, miR-377-3p, miR-193b-3p, miR-204-3p, miR-22-3p, miR-15b-5p, miR-665, miR-17-3p, miR-487b-5p, miR-874-5p, miR-4492, miR-424-5p, miR-214, miR-10b-5p, miR-3184-5p, miR-6134, miR-873a-5p, miR-542-3p, miR-197-3p, miR-22-3p, miR-145a-5p, miR-138, miR-30b-3p, miR-29b, miR-16b, miR-380-3p, miR-1260b, miR-497-5p, miR-7862, miR-455-5p, miR-31-5p, miR-133b-5p, miR-103a-3p, miR-339-5p, miR-26b-3p, miR-134-3p, miR-3431, miR-149-5p, miR-544b, miR-103, miR-377-3p, miR-330-3p, novel\_51, miR-455-5p, miR-2411-3p, miR-483-3p, miR-124-5p, miR-1343-5p, miR-193a-3p, miR-6240, miR-628-5p, miR-2285r, miR-2387, miR-1306, miR-150-5p, miR-18a-3p, miR-1291, miR-107, miR-412-3p, miR-9851-3p, miR-195a-5p, miR-6395, miR-135b-5p, miR-379-5p, novel\_68, miR-10a-5p, novel\_69, miR-29a-3p, miR-299b-3p, miR-6535, miR-15a, miR-16a, miR-128-1-5p, miR-29a, miR-6123, miR-199c, miR-193b-

miR-744-3p, miR-2330-5p, miR-382-3p, miR-30c-1-3p, miR-2957, novel\_19, miR-431-5p, miR-214-3p, miR-103a-2-5p, miR-3085-3p, miR-222-5p, miR-105-1, miR-1343-3p, novel\_4, miR-221-3p, miR-148b-5p, miR-2459, miR-30b-3p, miR-6529a, miR-484, miR-1298-5p, miR-1839-5p, miR-2426, miR-450b-5p, miR-3059-5p, novel\_60, miR-2447, miR-3956-3p, miR-885-5p, miR-363-3p, miR-877-3p, miR-361-3p, miR-2285y, miR-107-5p, novel\_82, miR-2285n, miR-2284q, miR-4726-5p, miR-3064-5p, miR-664b, miR-4443, miR-489, miR-361-3p, miR-221, novel\_94, miR-183-5p, miR-143-3p, miR-125b-2-3p, miR-92a-1-5p, novel\_17, miR-760-3p, miR-1b-3p, miR-3600, miR-485-3p, miR-487a-3p, miR-210-3p, miR-222-5p, miR-5703, miR-217-5p, miR-2300b-3p, miR-215-5p, miR-218-1-3p, miR-133a-3p, miR-148a-5p, miR-214, miR-3074-5p, miR-145a-3p, miR-6525, miR-224-5p, miR-320e, miR-3604, miR-29b-2-5p, miR-665, miR-222-3p, miR-874-5p, miR-532-5p, miR-30c-1-3p, miR-32-5p, novel\_32, miR-204-3p, miR-877-5p, miR-192-5p, miR-411, miR-1895, miR-625-5p, novel\_99, miR-101-5p, miR-628-5p, let-7j, miR-296-3p, miR-539-3p, miR-654-3p, miR-432-3p, miR-105-5p, miR-32, miR-3141, novel\_51, miR-224-5p, miR-296-3p, miR-466f-3p, miR-483-3p, miR-378a-5p, miR-194-3p, miR-149-5p, miR-432-5p, miR-185-5p, miR-197-3p, miR-708-3p, miR-432, miR-4508, miR-188-5p, miR-30b-3p, miR-219b-3p, miR-24-3p, miR-323c, miR-22-5p, miR-147-5p, miR-128-1-5p, miR-92a-3p, miR-379-3p, novel\_68, miR-3074-5p, miR-378b, miR-3141, miR-9851-3p, miR-450b-3p, miR-3064-5p, miR-29b-2-5p, miR-4286, miR-376c-5p, novel\_39, miR-2285b, miR-92b-3p, miR-148b-5p, miR-30c-2-3p, miR-217, miR-2285af, miR-664-3p, miR-92a-3p, miR-543-5p, miR-431, miR-2285ad, miR-222, miR-582-3p, novel\_121, miR-483-3p, miR-218-2-3p, miR-105-2, miR-411-3p, miR-323-3p, miR-5100, miR-2355-5p, miR-370-3p, miR-215-5p, miR-25-3p, miR-200a-5p, miR-

miR-3059-5p, miR-181d-5p, miR-877-3p, miR-770b, miR-154a, novel\_82, miR-3968, miR-3958-3p, miR-211-5p, miR-378g, miR-499a-3p, miR-489, let-7d-5p, miR-203-3p, miR-1185-2-3p, miR-140-5p, miR-299b-5p, miR-136-5p, miR-504, miR-376a-3p, miR-1983, miR-544-5p, novel\_94, miR-124a, let-7a-5p, miR-494-3p, miR-1839-3p, miR-8485, miR-2310, miR-199a-3p, miR-326, miR-1306-5p, miR-29b-1-5p, miR-182-5p, let-7e, miR-214-3p, miR-199b-3p, novel\_4, miR-1343-3p, miR-409b, miR-222-5p, miR-181b-2-3p, miR-376b-3p, miR-142-3p, miR-455-3p, miR-1185-3p, miR-2284r, miR-143-5p, miR-3962, miR-125b-2-3p, miR-30b-3p, miR-1388-5p, miR-1839-5p, let-7b, miR-590-3p, miR-129-2-3p, miR-145a-3p, miR-3184-3p, miR-4510, miR-3074-5p, miR-3074-2-3p, miR-214, miR-346, let-7b-5p, miR-122-5p, miR-6134, miR-181c-5p, miR-2285j, let-7f, miR-15b-3p, miR-30a-3p, miR-664a-5p, miR-29b-2-5p, miR-874-5p, miR-208b-5p, miR-129-5p, miR-130b-5p, miR-504-5p, miR-140-5p, miR-660-5p, miR-496-3p, miR-1277-3p, miR-21-3p, miR-216b-3p, miR-182-5p, miR-6516, miR-192-5p, miR-582-5p, miR-6130, novel\_25, let-7i-5p, miR-21a-3p, miR-299, miR-433-3p, miR-345-5p, miR-18a-5p, miR-885-3p, miR-582-5p, novel\_99, miR-195a-3p, miR-29b-1-5p, miR-376a-5p, miR-130a-5p, miR-181b-1-3p, miR-142a-3p, miR-125b-2-3p, miR-2424, miR-143-3p, novel\_17, miR-216a-5p, miR-324-3p, miR-125b, miR-202-5p, miR-98-5p, miR-30b-3p, miR-2484, let-7k, miR-18a-3p, miR-1b-3p, miR-30d-3p, miR-383-5p, miR-200b, miR-532-3p, miR-199a-3p, miR-1961, miR-215-5p, miR-193b-5p, miR-124-3p, miR-1197-5p, miR-5703, miR-140-3p, miR-33b-3p, miR-142-3p, miR-664-5p, miR-361-5p, miR-1a-1-5p, miR-1839-3p, miR-211, miR-24-3p, miR-326-3p, miR-2284w, let-7i, miR-382-5p, miR-33a-3p, miR-22-5p, miR-199c, miR-363, novel\_68, miR-329-5p, miR-3074-5p, miR-320b, miR-655-5p, miR-2404, miR-146b-3p, miR-411b-3p, miR-

miR-214-3p, miR-308b-3p, miR-491-5p, novel\_19, miR-16b, miR-5126, miR-4532, miR-193a, miR-758-3p, let-7c-3p, miR-1388-3p, miR-424-5p, miR-1839-5p, miR-758-3p, miR-6529a, miR-541, miR-2459, miR-151a-3p, novel\_78, miR-2300a-5p, miR-1343-3p, miR-4726-5p, miR-499a-5p, miR-769-5p, miR-361-3p, miR-541-3p, novel\_94, miR-877-3p, miR-147-3p, miR-136-5p, miR-504, miR-361-3p, miR-4792, miR-3064-5p, miR-21-3p, miR-324-3p, miR-185-3p, miR-125b, miR-196a-3p, miR-486-3p, miR-2887, miR-105-3p, miR-493-3p, miR-5703, novel\_133, miR-2300b-3p, miR-151-5p, novel\_83, miR-532-3p, miR-328-3p, miR-15a-5p, miR-3960, miR-18a-3p, miR-874-5p, miR-4492, miR-424-5p, novel\_74, miR-664a, miR-324-3p, miR-151-3p, miR-3604, miR-665, miR-6134, miR-769-5p, novel\_44, miR-346, miR-214, miR-145a-3p, miR-4510, miR-625-5p, miR-1827, let-7g-3p, miR-339b, miR-345-5p, miR-129b-3p, miR-433-3p, miR-151b, miR-15b-5p, miR-2284s, miR-193b-3p, miR-6130, miR-3065-3p, miR-545-3p, miR-504-5p, miR-125a-5p, miR-1343-5p, miR-193a-3p, miR-483-3p, miR-197-5p, novel\_51, miR-7-5p, miR-345-5p, miR-432-3p, miR-668-3p, miR-497-5p, miR-4508, miR-744-5p, miR-7862, miR-29b, miR-16b, miR-197-3p, miR-2113, miR-1285, miR-7b-5p, miR-103, miR-185-5p, miR-339-5p, miR-3955-5p, miR-103a-3p, miR-6123, miR-128-1-5p, miR-29a, miR-16a, miR-2284o, miR-15a, miR-4324, miR-6529b, miR-193b-3p, miR-3957-3p, miR-29c-3p, miR-135a-2-3p, miR-379-5p, miR-6395, miR-195a-5p, miR-1291, miR-107, miR-150-5p, miR-18a-3p, miR-378b, miR-6535, miR-146b-3p, miR-411b-3p, miR-29a-3p, novel\_68, miR-107, novel\_127, miR-543-5p, novel\_96, miR-2898, miR-339a, miR-125a-3p, miR-29a-5p, novel\_39, miR-3065-3p, miR-490-3p, miR-1271-3p, miR-3064-5p, miR-2284f, miR-29d-3p, miR-1343-5p, miR-486-5p, miR-214-5p, miR-505-5p, miR-322-5p, miR-483-3p, miR-1224-5p, novel\_79, miR-423-3p, miR-3432a, miR-486b-3p, miR-185-3p, miR-219-3p, miR-374a-5p, miR-8117, miR-2285af, miR-543-5p, miR-466i-5p, miR-320d, miR-2432, miR-142a-3p, miR-5703, miR-2904, miR-4429, miR-2285ad, miR-582-3p, miR-2284z, miR-1271-5p, miR-3604, miR-320e, miR-219b-3p, miR-324-3p, miR-2285j, miR-130b-5p, miR-4492, miR-664a, miR-138-5p, miR-3607-3p, miR-1271, miR-374b, miR-6134, miR-3184-5p, miR-224-5p, miR-1197-3p, miR-3154, miR-320a, miR-1248, miR-7144-5p, miR-625-5p, miR-2285aa, miR-660-5p, miR-874-3p, miR-133c, miR-377-3p, miR-194a, miR-136-3p, novel\_19, miR-377-3p, miR-224-5p, miR-320b, miR-660, miR-363-5p, miR-130b-5p, miR-4532, miR-194-5p, miR-197-3p, miR-2284aa, miR-4508, miR-138, miR-26b-3p, miR-187-3p, miR-142-3p, miR-2285y, miR-2285n, miR-194b-5p, miR-219a-2-3p, miR-2284w, miR-2428, miR-423-5p, miR-96-5p, miR-3120-3p, miR-2285u, miR-374b-5p, miR-320c, miR-669

miR-339b, miR-505-3p, miR-1827, miR-381-3p, miR-378g, miR-377-3p, miR-27a-3p, miR-2319b, miR-32-3p, miR-2331-3p, miR-30c-1-3p, miR-3064-5p, miR-615-5p, miR-141-3p, miR-552-3p, miR-542-5p, miR-2355-5p, miR-3065-3p, miR-450a-5p, miR-6123, miR-486b-3p, miR-331-3p, miR-371b-3p, miR-135a-2-3p, miR-32-3p, miR-323b, miR-134-3p, miR-545-5p, miR-9788-3p, miR-27a-3p, miR-505-3p, miR-339-5p, novel\_79, miR-3085-3p, miR-200a-3p, miR-377-3p, miR-339a, miR-30c-2-3p, miR-323b-3p, miR-30c-1-3p, miR-450c-5p, miR-486-3p, miR-200a, miR-3065-3p, miR-2432, miR-2330-5p, miR-628-5p, miR-3064-5p, miR-193a-5p, miR-16-5p, miR-2433, miR-3068-3p, miR-2285aa, miR-3959-5p, miR-331-5p, miR-30e-5p, miR-93-5p, miR-200a-5p, miR-329b, miR-345-5p, miR-1248, miR-20b-5p, miR-450c-5p, miR-200a, miR-205-5p, miR-3071-3p, miR-127-5p, novel\_127, miR-152-3p, miR-429-3p, miR-299a-3p, miR-2285ad, miR-322-5p, novel\_121, miR-450a-1-3p, miR-1290, miR-3591-5p, miR-1839-3p, miR-301b-3p, miR-576-3p, miR-4324, miR-216b-3p, miR-411b-3p, miR-299b-3p, miR-6535, miR-148a-3p, miR-3591-3p, miR-378f, miR-2319a, miR-493-5p, miR-432-3p, miR-432-3p, miR-503-3p, miR-377-3p, miR-194a, miR-105-5p, miR-31-5p, miR-134-3p, miR-411-5p, miR-1843b-5p, miR-223-3p, miR-432, novel\_23, miR-450c-3p, miR-16-1-3p, miR-16b, miR-2284x, miR-188-5p, miR-497-5p, miR-590-3p, miR-214, miR-224-5p, miR-346, miR-769-5p, miR-122-5p, miR-3184-5p, miR-30e-3p, miR-3604, miR-665, miR-30a-3p, miR-151-3p, miR-487b-5p, miR-130b-5p, miR-874-5p, miR-500, miR-454-3p, miR-301a-3p, miR-377-3p, miR-15b-5p, miR-450a-1-3p, miR-411, miR-30d-5p, miR-500a-3p, miR-345-5p, miR-186-5p, miR-1827, miR-625-5p, miR-543-3p, miR-345-3p, miR-143-3p, miR-486-3p, miR-618, miR-422a, miR-106a, miR-18a-3p, miR-30d-3p, miR-7859, miR-193b-5p, miR-378i, miR-1434-5p, miR-378a-3p, miR-33b-3p, miR-142-3p, miR-16-1-3p, miR-3956-3p, miR-423-5p, miR-101-3p, miR-301a-5p, miR-211-5p, miR-378g, miR-1185-2-3p, miR-4443, miR-140-5p, miR-136-5p, miR-544-5p, miR-335-3p, miR-493-5p, miR-101b-3p, miR-378d, miR-2310, miR-8485, miR-106b-5p, miR-16b, miR-130b-3p, miR-1185-5p, miR-214-3p, miR-103a-2-5p, miR-153-3p, miR-1298-3p, miR-147a, miR-153, miR-421, miR-2459, miR-1185-3p, miR-301b-5p, miR-1388-5p, miR-1306-5p, miR-103b, miR-3607-3p, miR-93, miR-378c, miR-145-3p, miR-370-5p, miR-2332, miR-551b-3p, miR-34c-3p, miR-204-5p, miR-486b-3p, miR-365a-3p, miR-769, miR-374c-3p, miR-2284b, miR-381-3p, miR-

ZCCHC24 ENSOARGO(zinc fin.300,

UFM1 ENSOARGO(ubiquiti:

miR-1343-5p, miR-452-5p, miR-125a-5p, miR-7-5p, miR-2411-3p, miR-130b-5p, miR-29b, miR-4508, miR-2113, miR-7b-5p, miR-432, miR-22-3p, miR-185-5p, miR-3431, miR-432-5p, miR-412-5p, miR-3955-5p, miR-31-5p, miR-26b-3p, miR-339-5p, miR-29a, miR-199c, miR-6123, miR-203b-5p, miR-6402, miR-142b, miR-4324, miR-24-3p, miR-2284w, miR-199b-5p, miR-2428, miR-326-3p, novel\_27, miR-335-5p, miR-135a-2-3p, miR-29c-3p, novel\_101, miR-412-3p, miR-505-3p, miR-376a-2-5p, miR-2285ab, miR-18a-3p, miR-1306, miR-29a-3p, miR-411b-3p, miR-374c-3p, miR-2404, miR-320c, miR-3074-5p, novel\_68, miR-7-1-3p, miR-10a-5p, miR-320b, miR-450a-2-3p, miR-543-5p, novel\_96, novel\_127, miR-205-5p, miR-339a, miR-2478, miR-199a-5p, miR-29a-5p, miR-3065-3p, miR-3064-5p, miR-10a-5p, miR-345-3p, miR-330-5p, miR-30a-5p, miR-1343-5p, miR-29d-3p, miR-2411-5p, miR-24-2-5p, novel\_121, miR-129-1-3p, miR-214-5p, miR-222, miR-431, novel\_79, miR-28-5p, miR-126b-3p, miR-135a-1-3p, miR-2332, miR-5100, novel\_63, miR-29b-3p, miR-409-3p, miR-125b-5p, miR-6740-5p, miR-193a-5p, miR-10b-3p, miR-876-3p, miR-485-5p, miR-1814c, miR-301, miR-30e-5p, miR-320a, miR-3965, miR-374c-3p, miR-3957, miR-199a-5p, miR-3068-3p, miR-874-3p, miR-574-5p, miR-3957-5p, miR-125a, novel\_124, miR-3085-3p, miR-491-5p, miR-1468, miR-199b-5p, miR-153-3p, miR-431-5p, miR-326, miR-1306-5p, miR-320b, miR-199a-3p, miR-182-5p, miR-29b-1-5p, miR-2957, miR-491-3p, miR-2310, miR-382-3p, miR-494-3p, miR-2330-5p, miR-1388-3p, miR-33a-5p, let-7c-3p, miR-3120-5p, miR-10b, miR-6529a, miR-296-5p, miR-484, miR-142-5p, miR-539-5p, miR-153, miR-455-3p, miR-221-3p, miR-199b-3p, novel\_78, miR-5010-3p, miR-335, miR-628-3p, miR-3968, miR-2284q, miR-490-5p, miR-2440, miR-30b-5p, miR-218-5p, miR-212-3p, miR-3059-5p, miR-2447, miR-452-5p, miR-2285f, miR-136-5p, miR-

LAMP5      ENSOARGO( lysosoma

miR-197-5p, miR-105-5p, miR-224-5p, miR-377-3p, miR-146a, miR-193a-3p, miR-466f-3p, miR-483-3p, miR-101-5p, let-7f-2-3p, let-7f-2-3p, miR-628-5p, miR-130b-5p, miR-493-5p, miR-345-5p, miR-654-3p, miR-2284l, miR-197-3p, miR-145a-5p, novel\_23, miR-374b-3p, miR-497-5p, miR-188-5p, miR-380-3p, miR-2284ab, miR-16b, miR-31-5p, miR-340-3p, miR-149-5p, miR-412-5p, miR-2285g, miR-2284d, miR-3431, miR-16a, novel\_87, miR-15a, miR-656-5p, miR-193b-3p, miR-2285x, novel\_101, miR-219b-3p, miR-342-3p, miR-199b-5p, miR-2284w, miR-150-5p, miR-1306, miR-18a-3p, miR-3591-3p, miR-2285ab, miR-148a-3p, miR-2319a, miR-146b-5p, miR-135b-5p, miR-195a-5p, miR-6516-3p, miR-3074-5p, miR-669, miR-6535, miR-3071-3p, miR-30f, miR-205-5p, miR-200c, miR-152-3p, novel\_127, miR-200c-3p, miR-3064-5p, miR-199a-5p, miR-490-3p, miR-1271-3p, miR-450b-5p, miR-7134-5p, miR-134, miR-200b-3p, miR-105-2, miR-412, miR-7641, miR-2285ad, miR-429-3p, miR-2284z, miR-134-5p, miR-129-1-3p, miR-322-5p, miR-24-2-5p, miR-483-3p, miR-135a-5p, miR-2284k, miR-2332, miR-5100, miR-31-3p, miR-134-5p, novel\_9, miR-16-5p, miR-6128, miR-2284v, miR-323-3p, miR-362-5p, miR-488-3p, miR-424-3p, miR-7144-5p, miR-671-5p, miR-10b-3p, miR-2318, miR-345-5p, miR-329a, miR-2355-5p, miR-199a-5p, miR-223-5p, miR-376c-3p, miR-154b-5p, miR-300-3p, miR-769, miR-29b-1-5p, miR-505, miR-362-3p, miR-16b, miR-342, novel\_103, miR-1306-5p, miR-146b, miR-199b-5p, miR-103a-2-5p, miR-3085-3p, miR-3955-3p, miR-33a-5p, miR-424-5p, miR-8485, miR-758-3p, miR-412-3p, miR-758-3p, miR-329-3p, miR-6529a, miR-484, miR-101c, miR-2284aa, miR-362-3p, miR-1388-5p, miR-2426, miR-222-5p, miR-145b, miR-105-1, miR-500-5p, miR-1185-3p, miR-2285e, miR-126a-5p, miR-1298-3p, miR-142-3p, miR-539-5p, miR-769-5p, miR-2285y, miR-371a-5p, miR-107-5p, miR-2285n, miR-2285f, miR-305a-5p, miR-80a5, miR-362-3p, miR-33a-3p, miR-125b-5p, miR-142b, miR-130b-5p, miR-206, miR-135a-2-3p, miR-338-3p, miR-206-3p, miR-6525, miR-433-3p, miR-129b-5p, miR-27b-5p, miR-1814c, miR-6395, let-7g-3p, miR-1291, miR-7977, miR-125a, miR-3965, novel\_69, miR-365a-3p, miR-185-3p, miR-125b, miR-2957, miR-105-5p, miR-2397-5p, miR-26a-5p, novel\_96, miR-125a-5p, miR-760-3p, miR-3955-3p, miR-491-5p, miR-2887, let-7c-3p, miR-1, miR-130b-5p, miR-2310, miR-8485, novel\_23, miR-374b-3p, miR-1a-3p, miR-4791, miR-2113, miR-484, miR-105-2, miR-16-1-3p, miR-4508, novel\_73, miR-142-3p, miR-16-1-3p, miR-105-1, miR-328-3p, miR-214-5p, miR-2459, novel\_116, miR-3535  
miR-6119-3p, miR-200c-3p, miR-144, miR-217, novel\_87, miR-200c, miR-369-3p, miR-582-5p, miR-30b-3p, miR-217-5p, miR-30b-3p, miR-2285c, miR-144-3p, miR-2285e, miR-582-5p, miR-2285g, miR-139-5p, miR-139-5p, novel\_4, miR-429-3p, miR-548o-3p



miR-652b, miR-3184-5p, miR-433-5p, miR-3074-5p, miR-129-2-3p, miR-3958-5p, miR-665-5p, miR-214, miR-500, miR-874-5p, miR-4492, miR-10a, miR-377-3p, miR-216b-5p, miR-15b-5p, miR-151b, miR-30c-1-3p, miR-548o-3p, miR-296-3p, miR-345-5p, miR-339b, miR-885-3p, miR-543-3p, miR-625-5p, miR-1895, miR-1827, miR-450a-1-3p, miR-598-3p, miR-500a-3p, miR-376a-5p, miR-377-5p, miR-486-3p, miR-143-3p, miR-2285w, novel\_17, miR-2285p, miR-219b-5p, miR-324-3p, miR-500a-5p, miR-92a-1-5p, miR-7859, miR-210-3p, miR-2284h-5p, miR-18a-3p, miR-493-3p, novel\_73, miR-218-1-3p, miR-34a-5p, miR-423-5p, miR-2447, miR-3968, miR-615, miR-301a-5p, miR-378g, miR-3596, miR-2483-3p, miR-4443, miR-500-3p, miR-4792, miR-2319b, miR-668-5p, miR-1983, miR-140-5p, miR-378j, miR-8485, miR-1b-5p, miR-491-5p, miR-1185-5p, miR-487b-5p, miR-199b-5p, miR-214-3p, miR-199a-3p, miR-505, miR-16b, miR-1298-3p, miR-455-3p, miR-1343-3p, miR-199b-3p, miR-145b, miR-2284r, miR-301b-5p, miR-501-3p, miR-1260b, miR-16-5p, novel\_9, miR-134-5p, miR-592, miR-2284k, miR-133c, miR-574-5p, miR-2355-5p, miR-345-5p, miR-329b, miR-148b-5p, novel\_39, miR-2285b, novel\_127, novel\_96, miR-200a-3p, miR-125a-3p, miR-3071-3p, miR-322-5p, miR-505-5p, miR-134-5p, miR-450a-1-3p, miR-129-1-3p, novel\_121, miR-2285ad, miR-299a-3p, miR-429-3p, novel\_79, miR-1224-5p, miR-412, miR-18b-5p, miR-885-3p, miR-1290, miR-2427, miR-1343-5p, miR-330-5p, miR-23b-5p, miR-199b-5p, miR-1247-3p, miR-142b, novel\_69, miR-299b-3p, miR-144-3p, miR-6535, novel\_68, miR-3074-5p, miR-3120-3p, miR-410-5p, miR-412-3p, miR-2319a, miR-3970, miR-1306, miR-216a-3p, miR-432-3p, miR-2284l, miR-668-3p, miR-628-5p, miR-483-3p, miR-106b-3p, miR-7-5p, miR-377-3p, miR-2285v, novel\_51, miR-134-3p, miR-140-5p, miR-194-3p, miR-320-5p, miR-16b, miR-1508, miR-197-29a-5p, miR-6529b, novel\_94, miR-7134-3p, miR-582-3p, miR-2319a, miR-29a-5p

SMARCC2 ENSOARGO(SWI/SNF) : 3p, miR-329-5p, miR-1843b-5p, miR-329a-5p, miR-329b, miR-491-5p, miR-128-1-5p, novel\_96

NEFL ENSOARGO(neurofilin) : miR-6119-5p, miR-541, miR-21c, miR-876-3p, miR-21-5p, miR-541-3p, miR-4510, miR-140-5p, miR-193a-5p, miR-6130, miR-6134

R3HDM4 ENSOARGO(R3H domain) : miR-450a-5p, miR-127-5p, miR-135b-5p, miR-450c-5p, miR-135a-5p

CREB3L2 ENSOARGO(cAMP response element binding protein 3-like 2) : 5p

NEFM ENSOARGO(neurofilin medium) : 5p

miR-18a, miR-488-3p, miR-7144-5p, miR-141-3p, miR-487a-3p, miR-324-5p, miR-133c, miR-1-5p, miR-2332, miR-410-3p, miR-138-5p, miR-374a-3p, miR-1260b, miR-1343-5p, miR-330-5p, miR-18b-5p, miR-431, miR-222, miR-545-5p, miR-214-5p, miR-3071-3p, miR-1260a, miR-376b-3p, miR-107, miR-152-3p, miR-200a-3p, miR-450a-2-3p, miR-1a-2-5p, miR-30a-3p, miR-29b-2-5p, miR-376b-3p, miR-148a-3p, miR-18b, miR-2387, miR-450b-3p, miR-19a-3p, miR-107, miR-3120-3p, miR-6535, miR-502-5p, miR-576-3p, miR-22-5p, miR-136-3p, miR-1a-1-5p, miR-326-3p, novel\_27, miR-301b-3p, miR-323c, miR-3071-5p, miR-194-5p, miR-145a-5p, miR-653, miR-873a-5p, miR-1434-3p, miR-138, miR-1260b, miR-130a-3p, miR-103a-3p, novel\_116, miR-411-5p, miR-103, miR-3431, miR-194a, miR-224-5p, miR-377-3p, miR-1343-5p, miR-124-5p, let-7f-2-3p, let-7f-2-3p, miR-2285r, miR-21a-3p, novel\_99, miR-154b-3p, miR-18a-5p, miR-552-3p, miR-548o-3p, miR-204-3p, novel\_32, miR-377-3p, miR-301a-3p, miR-139-5p, miR-30a-3p, miR-29b-2-5p, miR-664a-5p, miR-222-3p, miR-30e-3p, miR-454-3p, miR-664a, miR-425-5p, miR-3074-2-3p, miR-539-5p, miR-3184-3p, miR-3184-5p, miR-338-3p, miR-6525, miR-224-5p, miR-1434-5p, miR-126-3p, miR-2366, miR-2300b-3p, miR-361-5p, miR-493-3p, miR-19b-3p, miR-3600, miR-485-3p, miR-487a-3p, miR-383-5p, miR-148b-3p, miR-500a-5p, miR-2285p, novel\_17, miR-1277-5p, miR-345-3p, miR-487a, miR-130a-5p, miR-221, miR-376a-3p, miR-668-5p, miR-541-5p, miR-139-5p, miR-376d, miR-1185-2-3p, miR-2483-3p, novel\_82, miR-154-3p, miR-499a-5p, miR-452-5p, miR-194b-5p, miR-2447, miR-423-5p, miR-361-3p, miR-296-5p, miR-143-5p, miR-1839-5p, miR-1388-5p, miR-450b-5p, miR-145b, miR-221-3p, miR-1185-3p, miR-2459, miR-376b-3p, miR-326, miR-431-5p, miR-130b-3p, miR-101b-3p, miR-494-3p, miR-1b-5p

miR-323-5p, miR-139-5p, miR-377-3p, miR-34c-5p, miR-151b, miR-22-3p, novel\_32, miR-125a, miR-370-3p, miR-3065-3p, miR-18a-5p, miR-339b, miR-10b-3p, miR-1248, miR-543-3p, miR-21a-3p, miR-18a, miR-23b, miR-1260b, miR-338-3p, miR-181c-5p, miR-3184-5p, miR-214, miR-103b, miR-665-5p, miR-664a, miR-134-5p, miR-486b-3p, miR-130b-5p, miR-4492, miR-125b-5p, miR-331-3p, miR-23c, miR-383-5p, miR-24-2-5p, miR-23b-3p, miR-328-3p, miR-151-5p, miR-134-5p, miR-532-3p, miR-2284z, miR-6517, miR-431, miR-18b-5p, miR-212-5p, novel\_79, miR-493-3p, miR-378d, miR-34a-5p, miR-133a-3p, miR-134, miR-188-3p, miR-380-3p, miR-3065-3p, miR-486-3p, miR-345-3p, miR-4286, miR-3064-5p, miR-181b-5p, miR-34b-5p, novel\_17, miR-1260a, miR-339a, miR-125b, miR-185-3p, miR-324-3p, miR-411b-3p, miR-34b, novel\_69, miR-323a-5p, miR-27a-3p, miR-6535, miR-669, miR-452-3p, miR-3064-5p, miR-139-5p, miR-320b, novel\_94, miR-877-3p, miR-6395, miR-9851-3p, miR-18b, miR-1306, miR-150-5p, miR-24-3p, miR-449a, miR-423-5p, miR-342-3p, miR-3059-5p, miR-181d-5p, miR-3968, miR-4324, miR-34c, miR-216a-3p, miR-149-5p, miR-133b-5p, miR-31-5p, miR-27a-3p, miR-339-5p, miR-1260b, miR-380-3p, miR-27b-3p, miR-7862, miR-188-5p, miR-4508, miR-181a-5p, miR-296-5p, miR-22-3p, miR-197-3p, miR-8485, miR-382-3p, miR-130b-5p, miR-23a-3p, miR-668-3p, miR-3085-3p, miR-214-3p, miR-466f-3p, miR-125a-5p, miR-377-3p, miR-1306-5p, miR-431-5p, miR-342, novel\_51

let-7g, miR-195/7a, miR-29a-5p, let-7f-5p, miR-6536, miR-107, miR-30c-2-3p, miR-3071-3p, let-7c-5p, miR-545-5p, miR-450a-1-3p, novel\_121, miR-299a-3p, miR-2285ad, miR-412, let-7d, miR-582-3p, miR-30c, miR-496, let-7a-2-3p, miR-10a-5p, miR-196a-5p, miR-501-3p, miR-30a-5p, miR-93, miR-374a-3p, miR-3607-3p, miR-6128, miR-138-5p, miR-331-5p, miR-374b-3p, miR-34c-3p, miR-135a-1-3p, miR-144, miR-125b-5p, miR-6740-5p, miR-135a-5p, miR-331-5p, miR-300-3p, miR-3068-3p, miR-503-3p, miR-2285aa, miR-125a, miR-2318, novel\_91, miR-20b-5p, miR-1248, miR-1814c, miR-30e-5p, miR-503-3p, miR-331-5p, miR-93-5p, miR-320a, miR-17-5p, miR-654-3p, let-7a-2-3p, miR-493-5p, miR-101-5p, miR-196b-5p, miR-125a-5p, miR-146a, miR-190a, miR-17-5p, miR-106a-5p, let-7g-5p, miR-185-5p, miR-20b, miR-103, miR-103a-3p, miR-138, miR-30b-3p, miR-16-1-3p, miR-26a-2-3p, miR-19b-2-5p, miR-873a-5p, miR-1434-3p, miR-450c-3p, miR-3071-5p, miR-219b-3p, novel\_120, miR-335-5p, novel\_1, miR-147-5p, miR-6402, miR-20a-5p, miR-576-3p, let-7i, miR-146b-3p, miR-299b-3p, miR-144-3p, miR-320c, miR-3074-5p, miR-3120-3p, miR-10a-5p, miR-450b-3p, miR-107, miR-146b-5p, let-7e-5p, miR-505-3p, miR-135b-5p, miR-3970, miR-3591-3p, miR-664b-3p, miR-146a-5p, miR-20a, miR-106a, miR-320d, miR-98-5p, miR-30b-3p, let-7k, miR-299-3p, miR-30b, miR-219b-5p, miR-185-3p, miR-125b, miR-383-5p, miR-340-5p, miR-106a, miR-3600, miR-505-3p, miR-212-5p, miR-30d-3p, miR-493-3p, miR-4429, miR-16-1-3p, miR-664-5p, miR-361-5p, miR-30c-5p, miR-1961, miR-1246, miR-2904, miR-188-3p, miR-142a-5p, miR-10b-5p, let-7b-5p, miR-6134, let-7b, miR-4510, miR-3074-5p, miR-3074-2-3p, miR-450b-3p, miR-6516-3p, miR-190a-5p, miR-487a-5p, miR-4492, let-7f, miR-19b-1-5p, miR-665, miR-664a-5p, miR-10a, miR-6130, let-7i-5p, miR-504-5p, miR-30c-1-3p, miR-106-3p, miR-21-3p, miR-30f, miR-186-5p, miR-21a-5p, miR-185-5p, miR-194-3p, miR-532-3p, miR-133b-5p, miR-665, miR-7-1-3p, miR-222-5p, miR-3956, miR-219a-1-3p, miR-146b-5p, miR-135b-5p, miR-877-3p, miR-873a-5p, miR-541, miR-3065-5p, miR-194-5p, miR-188-3p, miR-1957a, novel\_39, miR-146a-5p, miR-486-3p, miR-338-3p, miR-541-3p, miR-194b-5p, miR-146b, miR-208b-5p, miR-486b-3p, miR-146a, miR-101-3p, miR-135a-5p, miR-194a, miR-4429, miR-1388-5p, miR-3071-5p, miR-758-3p, miR-5703, miR-323b, miR-345-3p, miR-199a-3p, miR-455-3p, miR-340-5p, miR-3431, miR-496-5p, miR-665, miR-127-5p, miR-320d, miR-17-3p, miR-2411-3p, miR-345-3p, miR-323b-3p, novel\_115, miR-199a-3p, miR-320b, miR-758-3p, novel\_39, miR-432-3p, miR-432-3p, miR-664b-3p, miR-6516-3p, miR-504, miR-3154, miR-3065-5p, miR-320a, miR-320c, miR-504-5p, miR-140-5p, miR-17-3p, miR-6516-3p, miR-664a, miR-3969, miR-6740-5p, miR-2428, miR-17-3p, novel\_101, miR-429-3p, miR-26b-3p, miR-181b-2-3p, miR-383-5p, miR-6516-5p, miR-222-5p, miR-2355-3p, miR-125b-2-3p, miR-2426, miR-450b-5p, miR-200b-3p, miR-628-5p, miR-181b-1-3p, miR-125b-2-3p, miR-224-5p, miR-200c, miR-6119-5p, miR-200c-3p, miR-221-5p, miR-221-5p, miR-370-3p, miR-499b-5p, miR-582-5p, miR-6516, miR-677, miR-181b-3p, miR-582-5p, miR-145a-3p, miR-425-5p, miR-224-5p, miR-145-3p, miR-6402

miR-503-3p, miR-17-5p, miR-10b-3p, miR-671-5p, miR-1814c, miR-485-5p, miR-7144-5p, novel\_48, miR-215-5p, miR-34c-5p, miR-2284n, miR-199a-5p, miR-409-3p, miR-331-3p, miR-767-5p, miR-204-5p, miR-93, miR-145-3p, miR-378c, miR-501-3p, miR-218-2-3p, miR-10a-5p, miR-7641, miR-6516-5p, miR-378h, miR-1271-5p, miR-376b-3p, miR-339a, miR-30c-2-3p, miR-181b-5p, miR-450a-2-3p, miR-17-3p, miR-30a-3p, miR-1, miR-29b-2-5p, miR-2478, miR-199a-5p, miR-2387, miR-376b-3p, miR-18a-3p, miR-6395, miR-195a-5p, miR-7975, miR-378b, miR-10a-5p, miR-7-1-3p, miR-34b, miR-20a-5p, miR-502-5p, miR-15a, miR-16a, miR-34c, miR-17-3p, miR-2285x, miR-3959-3p, miR-24-3p, miR-211, novel\_27, miR-449a, miR-1434-3p, miR-181a-5p, miR-2284ab, miR-187-3p, miR-2285g, miR-2284d, miR-20b, miR-106a-5p, miR-17-5p, miR-130b-5p, miR-382, miR-654-3p, let-7g-3p, miR-32-3p, miR-378a-3p, miR-182-5p, miR-21-3p, miR-193b-3p, miR-139-5p, miR-192-5p, miR-6516, miR-204-3p, miR-655-3p, miR-29b-2-5p, miR-17-3p, miR-6516-3p, miR-664a, miR-450b-3p, miR-424-5p, miR-145a-3p, miR-378c, miR-3074-2-3p, miR-1271, miR-206-3p, miR-10b-5p, miR-215-5p, miR-1197-5p, miR-140-3p, miR-5703, miR-2904, miR-548e-3p, miR-3600, miR-148b-3p, miR-15a-5p, miR-216a-5p, miR-106a, miR-2284m, miR-34b-5p, miR-216c-5p, miR-20a, miR-199b-5p, miR-877-3p, miR-20a-3p, miR-664b, miR-7977, miR-541-5p, miR-378e, miR-376d, miR-2285n, miR-107-5p, miR-2285t, novel\_60, miR-32-3p, miR-181d-5p, miR-8095, miR-502-3p, miR-10b, miR-484, miR-6529a, miR-378b, miR-125b-2-3p, miR-450b-5p, miR-378c, miR-5010-3p, miR-2285e, miR-382-3p, miR-106a-5p, miR-424-5p, miR-33a-5p, let-7c-3p, miR-30c-1-3p, miR-193a, miR-301, miR-331-5p, miR-93-5p, miR-876-3p, miR-767, miR-20b-5p, miR-331-5p, miR-592, miR-16-5p, miR-1290, novel\_79, miR-322-5p, miR-9-5p, novel\_121, miR-2284z, miR-450a-1-3p, miR-664-3p, miR-205-

miR-34b-3p, miR-2424, miR-2411, miR-146a-5p, miR-486-3p, miR-181b-1-3p, miR-376c-3p, miR-125b-2-3p, miR-664b-3p, miR-2285p, miR-210-5p, miR-618, miR-196a-3p, miR-30b, miR-21-3p, miR-1277-5p, miR-30d, miR-485-3p, miR-3600, novel\_83, miR-200b, miR-148b-3p, miR-487a-3p, miR-7859, miR-140-3p, miR-217-5p, miR-2904, novel\_133, miR-30c-5p, miR-142-3p, novel\_73, miR-3074-2-3p, miR-145a-3p, miR-590-3p, miR-3184-5p, miR-142a-5p, miR-320e, miR-19b-1-5p, let-7b-3p, miR-130b-5p, miR-190a-5p, miR-708-5p, miR-487b-5p, miR-450b-3p, miR-532-5p, miR-552-3p, miR-182-5p, miR-216b-3p, miR-21-3p, miR-660-5p, miR-32-5p, miR-204-3p, miR-22-3p, miR-376e-3p, miR-6516, miR-30d-5p, miR-598-3p, let-7f-1-3p, miR-21a-3p, miR-186-5p, miR-885-3p, miR-30f, miR-2312, miR-494-3p, miR-182-5p, miR-323b-3p, novel\_103, miR-146b, miR-3955-3p, miR-491-5p, miR-27a-3p, miR-181b-2-3p, miR-330-3p, miR-126a-5p, miR-539-5p, miR-376b-3p, miR-142-5p, miR-3962, miR-323b, miR-4791, miR-3120-5p, miR-450b-5p, miR-190b-5p, miR-452-5p, miR-2285f, miR-2447, miR-423-5p, novel\_111, miR-30b-5p, miR-374a-3p, miR-4726-5p, miR-126b-5p, miR-211-5p, miR-541-5p, miR-20a-3p, miR-27a-3p, miR-376d, miR-454-5p, miR-4443, miR-203-3p, miR-25, miR-129b-5p, miR-381-3p, miR-378j, miR-335-3p, miR-376a-3p, miR-493-5p, miR-99b-5p, miR-2285b, miR-490-3p, novel\_39, miR-1957a, miR-29a-5p, miR-92b-3p, miR-217, miR-3071-3p, miR-30f, miR-200c, miR-99a, miR-376b-3p, miR-543-5p, miR-152-3p, novel\_96, miR-92a-3p, miR-200c-3p, miR-28-3p, miR-2898, miR-429-3p, miR-450a-1-3p, miR-6516-5p, miR-2411-5p, miR-30a-5p, miR-3591-5p, miR-196a-5p, miR-30c, miR-99a-5p, miR-200b-3p, miR-300, miR-582-3p, miR-885-3p, miR-28a-3p, miR-145-3p, miR-374a-3p, miR-323-3p, miR-144, miR-410-5p, miR-34c-3p, miR-486b-3p, miR-374b-3p, miR-204-5p, miR-28-5p, miR-502, miR-1271, miR-370-3p, miR-508-3p, miR-2285aa, miR-148a-5p, miR-1248, novel\_133, miR-296-5p, miR-148b-5p, miR-374c-3p, miR-374c-3p, miR-26b-3p, miR-2331-3p, miR-548o-3p, miR-874-3p, miR-4492, miR-21-3p, miR-2957, miR-409-3p, miR-224-5p, miR-15b-3p, miR-6119-5p, miR-2428, miR-432-3p, miR-224-5p, miR-345-3p, miR-744-3p, miR-1306-5p, miR-188-3p, miR-217-5p, miR-1290, miR-1246, miR-429-3p, miR-2285ad, miR-660, miR-200c-3p, miR-217, miR-200c, miR-219-3p, miR-296-3p, miR-6119-5p, miR-296-3p, miR-130a-5p, miR-376a-5p, miR-2478, miR-19a-3p, miR-10b-3p, miR-541-5p, miR-370-5p, miR-660-5p, miR-20a-3p, miR-545-3p, miR-490-5p, novel\_9, miR-499a-5p, miR-2285y, miR-219b-3p, miR-370-5p, miR-219a-2-3p, miR-8095, novel\_111, miR-1193

miR-193b-5p, miR-33b-3p, miR-2284u, miR-34a-5p, miR-548e-3p, miR-106a, miR-3600, miR-7859, miR-1247-5p, novel\_83, novel\_17, miR-210-5p, miR-2285p, miR-324-3p, miR-216a-5p, miR-106a, miR-2284m, miR-34b-5p, miR-21-3p, miR-20a, miR-195a-3p, miR-421-5p, miR-125b-2-3p, miR-130a-5p, miR-377-5p, miR-2424, miR-486-3p, miR-2432, miR-380-3p, miR-143-3p, miR-2285c, miR-129b-3p, miR-487b-5p, miR-582-5p, miR-140-5p, miR-1277-3p, miR-370-5p, miR-182-5p, miR-499b-3p, miR-301a-3p, miR-582-5p, miR-323-5p, miR-6130, miR-2285j, miR-324-3p, miR-320e, miR-664a, miR-487b-5p, miR-454-3p, miR-130b-5p, miR-4510, miR-3958-5p, miR-3074-2-3p, miR-769-5p, miR-224-5p, miR-412-3p, miR-125b-2-3p, miR-101a-5p, miR-2284aa, miR-3120-5p, miR-27a-3p, miR-1298-3p, miR-376b-3p, miR-147a, miR-2285e, miR-326, miR-182-5p, miR-106b-5p, miR-130b-3p, miR-3955-3p, miR-494-3p, miR-106a-5p, miR-2284b, miR-140-5p, miR-376a-3p, miR-877-3p, miR-2284g, miR-499b-5p, miR-499a-3p, miR-3082-5p, miR-2483-3p, miR-376d, miR-27a-3p, novel\_82, miR-769-5p, miR-3958-3p, miR-2285t, miR-490-5p, novel\_60, miR-3059-5p, miR-3956-3p, miR-1296-5p, miR-2284j, miR-877-3p, miR-219a-2-3p, miR-1290, miR-218-2-3p, miR-23b-5p, miR-330-5p, miR-411-3p, miR-128-3p, miR-7641, miR-412, miR-2284z, miR-376b-3p, miR-2285af, miR-8117, miR-219-3p, miR-3071-3p, miR-543-5p, miR-2478, miR-1957a, novel\_39, miR-29a-5p, miR-2284y, miR-2284a, miR-93-5p, miR-3154, miR-17-5p, miR-876-3p, miR-329b, miR-20b-5p, miR-874-3p, miR-34c-5p, miR-769, miR-2284n, miR-2284k, miR-494-5p, miR-370-5p, miR-26c, miR-3969, miR-135a-5p, miR-486b-3p, miR-2284v, miR-6128, miR-93, miR-1197-3p, miR-432, miR-653, miR-1285, miR-7b-5p, miR-197-3p, miR-374b-3p, miR-2284ab, miR-380-3p, miR-16-1-3p, miR-27b-3p, miR-455-5p, miR-130a-3p, miR-377-5p, miR-432-5p, miR-412-5p, miR-2284d, miR-2285a, miR-20b, miR-224-5p, miR-7-

novel\_39, miR-380-5p, miR-450b-5p, miR-543-5p, miR-6536, miR-217, miR-450a-1-3p, miR-9-5p, miR-758-5p, miR-299a-3p, miR-155-5p, let-7a-2-3p, miR-411-3p, miR-345-3p, miR-323-3p, miR-3607-3p, miR-331-3p, miR-34c-3p, miR-324-5p, miR-769, miR-2355-5p, miR-487a-3p, miR-7144-5p, miR-671-5p, miR-10b-3p, miR-10a-3p, miR-345-5p, let-7g-3p, miR-3154, miR-320a, miR-2448-3p, let-7a-2-3p, miR-345-5p, miR-432-3p, miR-432-3p, miR-380-5p, miR-466f-3p, miR-2411-3p, miR-185-5p, miR-31-5p, miR-30b-3p, miR-16-1-3p, miR-219a-1-3p, miR-450c-3p, miR-197-3p, miR-653, miR-542-3p, miR-2428, novel\_101, miR-342-3p, miR-203b-5p, miR-656-5p, miR-625-3p, miR-147-5p, miR-379-3p, miR-485-3p, miR-133a-5p, miR-320c, miR-299b-3p, miR-7-1-3p, miR-26b-5p, miR-505-3p, miR-6516-3p, miR-3065-5p, miR-2432, miR-376a-5p, miR-329a-5p, miR-10a-3p, miR-487a, miR-299-3p, miR-2484, miR-320d, miR-92a-1-5p, miR-345-3p, miR-26a-5p, miR-618, miR-210-5p, miR-487a-3p, miR-505-3p, miR-485-3p, miR-16-1-3p, miR-133a-3p, miR-378d, miR-4429, miR-5703, miR-217-5p, miR-769-5p, miR-669a-3p, miR-450b-3p, miR-6516-3p, miR-155-5p, miR-665, miR-155-5p, miR-216b-5p, miR-154a-3p, miR-296-3p, miR-552-3p, miR-545-3p, miR-186-5p, miR-154b-3p, miR-345-5p, miR-450a-1-3p, miR-3187-3p, miR-758-3p, miR-33a-5p, miR-494-3p, miR-103a-2-5p, miR-3955-3p, miR-487b-5p, miR-505, miR-320b, miR-342, novel\_115, miR-9788-3p, miR-455-3p, miR-1185-3p, miR-409b, miR-548w, miR-101c, miR-1388-5p, miR-30b-3p, miR-758-3p, miR-484, miR-9-3p, miR-877-3p, miR-452-5p, miR-9-5p, miR-212-3p, miR-2284q, miR-154-3p, miR-371a-5p, miR-769-5p, miR-107-5p, miR-1185-2-3p, miR-3596, miR-2483-3p, miR-20a-3p, miR-335-3p, miR-9-3p, miR-129b-5p, miR-361-3p, miR-140-5p



miR-767-5p, miR-374b-3p, miR-486b-3p, miR-5100, miR-370-5p, miR-29b-3p, miR-135a-5p, miR-3969, miR-331-3p, miR-374a-3p, miR-93, miR-365a-5p, miR-133a-3p, miR-6128, miR-329a, miR-767, miR-20b-5p, miR-7144-5p, miR-23b, miR-3154, miR-17-5p, miR-93-5p, miR-199a-5p, miR-2355-5p, miR-191-3p, miR-125a-3p, miR-30f, miR-2284a, miR-1271-3p, miR-2284y, novel\_39, miR-199a-5p, miR-3065-3p, miR-1, miR-128-3p, miR-3578, miR-330-5p, miR-29d-3p, miR-483-3p, miR-9-5p, miR-505-5p, miR-214-5p, miR-6517, miR-299a-3p, miR-1224-5p, miR-206, novel\_1, miR-29a, miR-20a-5p, miR-502-5p, miR-33a-3p, miR-382-5p, miR-199b-5p, novel\_27, miR-326-3p, miR-342-3p, miR-1193, miR-29c-3p, miR-379-5p, miR-135b-5p, miR-2387, miR-2285ab, miR-216a-3p, miR-150-5p, novel\_69, miR-299b-3p, miR-29a-3p, miR-670-3p, miR-146b-3p, miR-323a-5p, miR-2404, miR-6535, miR-3074-5p, miR-483-3p, miR-17-5p, novel\_51, miR-106a-5p, miR-365b-5p, miR-330-3p, miR-6240, miR-130b-5p, miR-2483-5p, miR-363-5p, miR-30b-3p, miR-29b, miR-27b-3p, miR-26a-2-3p, miR-542-3p, miR-432, miR-145a-5p, miR-22-3p, miR-185-5p, miR-134-3p, miR-432-5p, miR-3535, miR-544b, miR-20b, miR-194-3p, miR-130b-5p, miR-874-5p, miR-4492, miR-320e, miR-665, miR-324-3p, miR-206-3p, miR-6134, miR-3184-5p, miR-145a-3p, miR-4510, miR-3074-5p, miR-3184-3p, miR-214, miR-2330-3p, miR-2312, miR-133b-3p, miR-625-5p, miR-129b-3p, miR-6130, miR-323-5p, miR-544-3p, miR-22-3p, miR-204-3p, miR-182-5p, miR-3065-3p, miR-370-5p, miR-466i-5p, miR-106a, miR-299-3p, novel\_17, miR-185-3p, miR-125b-2-3p, miR-486-3p, miR-20a, miR-33b-3p, miR-148a-5p, miR-2284u, miR-133a-3p, miR-362-3p, miR-2366, miR-188-3p, miR-1197-5p, miR-140-3p, miR-124-3p, miR-23c, miR-23b-3p, miR-532-3p, miR-106a, miR-212-5p, miR-499a-5p, miR-374a-3p, miR-2440, miR-218-5p, miR-301a-5p, miR-1285-5p, miR-8095, miR-423-5p, miR-541-3p, miR-3956-3p, miR-

LASP1      ENSOARGO(LIM and

miR-21-3p, miR-552-3p, miR-140-5p, miR-30c-1-3p, miR-1277-3p, miR-22-3p, novel\_25, miR-155-5p, miR-6516, miR-544-3p, miR-21a-3p, miR-625-5p, novel\_99, miR-1827, miR-345-5p, miR-30f, miR-214, miR-3074-2-3p, miR-539-5p, miR-129-2-3p, miR-3184-5p, miR-122-5p, miR-206-3p, novel\_44, miR-224-5p, miR-219b-3p, miR-151-3p, miR-320e, miR-664a-5p, miR-29b-2-5p, miR-2285j, miR-708-5p, miR-4492, miR-6516-3p, miR-487b-5p, miR-3600, miR-30d-3p, miR-2284h-5p, miR-532-3p, miR-616-3p, miR-340-5p, miR-148b-3p, miR-1434-5p, miR-217-5p, miR-188-3p, novel\_133, miR-30c-5p, miR-193b-5p, miR-362-3p, miR-2300b-3p, miR-2366, miR-376a-5p, miR-16-1-3p, miR-142-3p, miR-4429, miR-33b-3p, miR-329a-5p, miR-29b-1-5p, miR-130a-5p, miR-125b-2-3p, miR-219b-5p, miR-500a-5p, miR-185-3p, miR-196a-3p, novel\_17, miR-299-3p, miR-2484, miR-320d, miR-760-3p, miR-2285u, miR-211-5p, miR-20a-3p, miR-452-3p, miR-203-3p, miR-3082-5p, miR-378j, miR-1306-3p, miR-129b-5p, miR-409-5p, miR-335-3p, miR-99b-5p, miR-147-3p, miR-668-5p, miR-2285f, miR-3059-5p, miR-423-5p, miR-219a-2-3p, miR-877-3p, miR-362-5p, miR-2285y, miR-382-3p, miR-1843a-3p, miR-2285t, miR-499a-5p, miR-145b, miR-105-1, miR-1343-3p, miR-548w, miR-151a-3p, miR-455-3p, miR-500-5p, miR-147a, miR-412-3p, miR-1a-3p, miR-329-3p, miR-362-3p, miR-544a, miR-450b-5p, miR-2426, miR-33a-5p, miR-1388-3p, miR-101b-3p, miR-193a, miR-2310, miR-30c-1-3p, miR-362-3p, miR-29b-1-5p, miR-320b, miR-1306-5p, miR-214-3p, miR-574-5p, miR-874-3p, miR-3068-3p, miR-320a, miR-362-5p, miR-3154, miR-100-5p, miR-7144-5p, miR-1248, miR-1814c, miR-767, miR-876-3p, miR-345-5p, miR-2318, miR-329a, let-7g-3p, miR-103b, miR-1306-5p, miR-500b-5p, miR-1260b, miR-374a-3p, miR-144, miR-3969, miR-409-3p, miR-410-5p, miR-1306-3p, miR-135a-1-3p, miR-28-5p, miR-374b-3p, miR-204-5p, miR-592, miR-138-5p, novel\_9, miR-767-5p, miR-

SULF2      ENSOARGO(sulfatas)

miR-24-3p, miR-323c, miR-449a, miR-326-3p, miR-342-3p, miR-3957-3p, miR-495-3p, miR-17-3p, miR-128-1-5p, miR-15a, miR-6529b, miR-16a, miR-34c, miR-2404, miR-34b, miR-29a-3p, miR-655-5p, miR-450b-3p, miR-9851-3p, miR-195a-5p, miR-18b, miR-2387, miR-654-3p, miR-345-5p, miR-363-5p, miR-125a-5p, miR-126a-3p, miR-330-3p, miR-2331-5p, miR-185-5p, miR-29b, miR-30b-3p, miR-744-5p, miR-500b-5p, miR-378c, miR-133a-3p, miR-486b-3p, miR-29b-3p, miR-34c-5p, miR-324-5p, miR-154b-5p, miR-370-3p, miR-141-3p, let-7g-3p, miR-23a-5p, novel\_48, miR-488-3p, miR-362-5p, miR-18a, miR-3154, miR-3065-3p, miR-29b-2-5p, miR-4286, miR-2898, miR-17-3p, miR-543-5p, miR-2285af, miR-339a, miR-483-3p, miR-378h, miR-214-5p, miR-105-2, miR-615-3p, miR-7134-5p, miR-29d-3p, miR-362-5p, novel\_60, miR-3059-5p, miR-541-3p, miR-4726-5p, miR-335, miR-2285n, miR-2285y, miR-378e, miR-3064-5p, miR-877-3p, miR-361-3p, miR-3187-3p, miR-424-5p, miR-652-5p, miR-376b, miR-3085-3p, miR-3955-3p, miR-342, miR-326, novel\_103, miR-362-3p, miR-9788-3p, miR-500-5p, miR-105-1, miR-409b, miR-378c, miR-2426, miR-484, miR-6529a, miR-378b, miR-143-5p, miR-30b-3p, miR-338-3p, miR-378c, miR-4510, miR-3074-2-3p, miR-425-5p, miR-17-3p, miR-208b-5p, miR-487a-5p, miR-424-5p, miR-19b-1-5p, miR-29b-2-5p, miR-6130, miR-204-3p, miR-140-5p, miR-221-5p, miR-378a-3p, miR-3065-3p, miR-133b-3p, miR-18a-5p, miR-582-5p, miR-29b-1-5p, miR-130a-5p, miR-760-3p, miR-30b-3p, miR-34b-5p, miR-221-5p, miR-21-3p, miR-299-3p, miR-196a-3p, miR-185-3p, miR-125b, miR-383-5p, miR-15a-5p, miR-199a-3p, miR-532-3p, miR-3600, miR-485-3p, miR-941, miR-378d, novel\_133, miR-362-3p, miR-1246, miR-2904, miR-188-3p, miR-1197-5p, miR-140-3p, miR-2284w, miR-335-5p, miR-29c-3p, miR-29a, miR-4324, miR-142b, miR-576-3p, miR-208a-3p, miR-299b-3p, novel\_69, miR-6535, miR-669, miR-3074-5p, miR-412-

novel\_39, miR-306b-3p, miR-2285b, miR-3064-5p, miR-181a-2-3p, miR-2898, miR-450a-2-3p, miR-1a-2-5p, novel\_127, novel\_96, miR-1260a, miR-339a, miR-505-5p, miR-6516-5p, miR-483-3p, miR-758-5p, miR-6517, novel\_79, miR-431, miR-300, miR-105-2, miR-128-3p, miR-345-3p, miR-1290, miR-29d-3p, miR-23b-5p, miR-1197-3p, miR-1260b, miR-193a-5p, miR-103b, miR-767-5p, miR-410-3p, miR-486b-3p, miR-29b-3p, miR-2433, miR-1-5p, miR-5100, miR-144, miR-331-3p, miR-6740-5p, miR-34c-5p, miR-374c-3p, miR-370-3p, miR-2355-5p, miR-2285aa, miR-615-5p, miR-767, miR-345-5p, miR-329a, miR-7144-5p, miR-1248, miR-381-3p, miR-488-3p, miR-503-3p, miR-424-3p, miR-320a, miR-6412, miR-345-5p, miR-130b-5p, miR-382, miR-483-3p, miR-193a-3p, miR-7-5p, miR-224-5p, miR-377-3p, miR-146a, miR-197-5p, miR-105-5p, miR-2411-3p, novel\_51, miR-3431, miR-194-3p, miR-2355-3p, miR-187-3p, miR-339-5p, miR-665, miR-29b, miR-1260b, miR-27b-3p, miR-7b-5p, miR-223-3p, miR-542-3p, miR-2113, miR-24-3p, miR-449a, novel\_27, miR-2285m, miR-2284w, miR-1a-1-5p, miR-193b-3p, miR-29c-3p, miR-29a, miR-421-5p, miR-6529b, miR-34c, miR-146b-3p, miR-2404, miR-29a-3p, novel\_69, miR-670-3p, miR-34b, miR-144-3p, novel\_68, miR-3120-3p, miR-412-3p, miR-19a-3p, miR-9851-3p, miR-6395, miR-1306, miR-3591-3p, miR-216a-3p, miR-18a-3p, miR-378b, miR-125b-2-3p, miR-486-3p, miR-146a-5p, miR-2285w, miR-760-3p, miR-34b-5p, miR-21-3p, miR-216a-5p, miR-92a-1-5p, miR-345-3p, miR-2284h-5p, miR-532-3p, miR-328-3p, miR-18a-3p, miR-3600, miR-19b-3p, miR-378d, let-7a-3p, miR-361-5p, miR-34a-5p, miR-362-3p, miR-98-3p, miR-1193, miR-188-3p, miR-140-3p, miR-5703, miR-6525, miR-224-5p, miR-98-3p, miR-338-3p, miR-433-5p, miR-539-5p, miR-3184-3p, miR-3074-2-3p, miR-487b-5p, miR-130b-5p, miR-2285j, let-7b-3p, miR-6516, miR-377-3p, miR-130-5p, miR-193b-3p, novel\_25, miR-2281, miR-30b-3p, miR-2284r, miR-378b, miR-143-5p, miR-3120-5p, miR-30b-3p, miR-378c, miR-16-1-3p, miR-665, miR-147a, novel\_51, miR-199a-3p, miR-193a-3p, miR-491-5p, miR-1388-3p, miR-378d, miR-18a-3p, miR-1306-3p, miR-1983, miR-6395, miR-378f, miR-450b-3p, miR-412-3p, miR-7689-3p, miR-24-1-5p, miR-378b, miR-3074-5p, miR-669, miR-378e, miR-371a-5p, miR-2285y, miR-1247-3p, miR-576-3p, miR-193b-3p, miR-495-3p, novel\_60, miR-2447, miR-3956-3p, miR-361-3p, miR-371b-3p, miR-378a-3p, novel\_133, miR-378i, miR-16-1-3p, miR-133a-3p, miR-212-5p, miR-2285ad, miR-18a-3p, miR-199a-3p, miR-214-5p, miR-328-3p, miR-24-2-5p, miR-378h, miR-324-3p, miR-422a, novel\_96, novel\_127, miR-450a-2-3p, miR-29b-2-5p, miR-3065-3p, miR-24-2-5p, miR-3065-3p, miR-140-5p, miR-378a-3p, miR-204-3p, miR-193b-3p, miR-6130, miR-324-3p, miR-3969, miR-29b-2-5p, miR-1306-3p, miR-378c, novel\_42, miR-3074-5p, miR-4510, miR-378c, miR-346

TRAFD1

ENSOARGO( TRAF-typ

PIGU

ENSOARGO( phosphat

miR-331-3p, miR-125b-5p, miR-135a-5p, miR-2285j, miR-34c-3p, miR-29b-3p, miR-204-5p, miR-664a, miR-425-5p, miR-539-5p, miR-1306-5p, miR-93, miR-93-5p, miR-376c-5p, miR-23b, miR-320a, miR-17-5p, miR-2285c, miR-376c-5p, miR-20b-5p, miR-485-5p, miR-1248, miR-1814c, let-7g-3p, miR-329a, miR-3065-3p, miR-370-3p, miR-125a, miR-1271, miR-532-5p, miR-504-5p, miR-376c-3p, miR-376e-3p, miR-27a-5p, miR-216b-5p, miR-139-5p, miR-125b, novel\_17, miR-30b-3p, miR-3653-3p, miR-543-5p, miR-21-3p, miR-320d, miR-466i-5p, miR-345-3p, miR-376c-5p, miR-3065-3p, miR-376b-5p, miR-29b-1-5p, miR-376c-3p, miR-2427, miR-29d-3p, miR-218-2-3p, miR-5703, miR-362-3p, miR-193b-5p, miR-1246, miR-1290, miR-4429, miR-548e-3p, miR-532-3p, miR-328-3p, miR-7859, miR-23b-3p, miR-383-5p, miR-23c, miR-20a-5p, miR-199c, miR-29a, miR-2285f, miR-29c-3p, miR-212-3p, miR-2284w, miR-2428, miR-211, miR-3959-3p, miR-378j, miR-2285ab, miR-376b-5p, miR-135b-5p, miR-6395, miR-1291, miR-299b-5p, miR-504, miR-136-5p, miR-211-5p, miR-363, miR-139-5p, miR-329-5p, miR-203-3p, miR-320c, miR-29a-3p, miR-670-3p, miR-362-3p, miR-29b-1-5p, miR-17-5p, novel\_51, miR-106a-5p, miR-320b, novel\_103, miR-125a-5p, miR-23a-3p, miR-101-5p, miR-8485, miR-2310, miR-329-3p, miR-873a-5p, miR-1434-3p, miR-1843b-5p, miR-362-3p, miR-29b, miR-219a-1-3p, miR-2426, miR-133b-5p, miR-199b-3p, miR-2300a-5p, miR-9788-3p, miR-216a-3p, miR-411-5p, miR-194-3p, miR-455-3p, miR-20b, miR-2285e, miR-2285g, miR-3431

ENTPD4 ENSOARGO(ectonucleoside diphosphate 4) miR-155-5p, miR-219a-2-3p, miR-320c, miR-744-3p, miR-155-5p, miR-4429, miR-320d, miR-9-3p, miR-155-5p, miR-219-3p, miR-320b, miR-320a, miR-2957, miR-219b-3p, miR-7857

FEZ2 ENSOARGO(fasciculation 2) miR-668-5p, miR-2426, miR-767, miR-29b, miR-410-5p, miR-29d-3p, miR-133c, miR-29a-3p, miR-487a-3p, miR-485-3p, miR-29a, miR-767-5p, miR-92a-1-5p, miR-218-5p, miR-29b-3p, miR-539-3p, miR-29c-3p, miR-668-3p, miR-3958-5p

JAK1 ENSOARGO(Janus kinase 1) miR-708-5p, miR-28-5p, miR-8117, novel\_103, miR-6525, miR-425-5p, miR-433-5p, miR-1388-5p, miR-22-3p, miR-2285c, miR-22-3p, miR-2285e, miR-2285g, miR-552-3p, miR-31-5p, novel\_78

VWA5A ENSOARGO(von Willebrand factor type A domain 5A)

novel\_94, miR-147-3p, miR-199b-5p, miR-361-3p, miR-378e, miR-7977, miR-541-5p, miR-335, miR-4726-5p, miR-769-5p, miR-1973, miR-8095, novel\_60, miR-2284aa, miR-378c, miR-30b-3p, miR-296-5p, miR-6529a, miR-378b, miR-142-3p, novel\_4, miR-2300a-5p, novel\_124, miR-5126, miR-326, miR-320b, miR-758-3p, miR-4532, miR-106a-5p, miR-155-5p, miR-877-5p, novel\_25, miR-22-3p, miR-323-5p, miR-6516, miR-3065-3p, miR-21-3p, miR-660-5p, miR-140-5p, miR-221-5p, miR-378a-3p, miR-664a, miR-6516-3p, miR-155-5p, miR-320e, miR-324-3p, miR-6134, miR-378c, miR-378d, miR-4429, miR-5703, miR-1193, miR-124-3p, novel\_133, miR-616-3p, miR-3960, miR-21-3p, miR-221-5p, miR-760-3p, miR-320d, miR-106a, miR-185-3p, miR-125b, miR-130a-5p, miR-20a, miR-6395, miR-107, miR-1291, miR-18a-3p, miR-2404, miR-323a-5p, miR-320b, miR-147-5p, miR-656-5p, miR-128-1-5p, miR-20a-5p, miR-133a-5p, miR-6529b, miR-2428, miR-326-3p, miR-1307-3p, novel\_101, miR-744-5p, miR-2889, miR-30b-3p, miR-3071-5p, miR-145a-5p, miR-1285, miR-103, miR-20b, miR-432-5p, miR-26b-3p, miR-187-3p, miR-660, miR-452-5p, miR-125a-5p, miR-1343-5p, miR-124-5p, miR-17-5p, miR-106a-5p, miR-130b-5p, miR-7144-5p, miR-320a, miR-17-5p, miR-2448-3p, miR-3957, miR-199a-5p, miR-769, miR-615-5p, miR-3957-5p, miR-486b-3p, miR-26c, miR-551b-3p, miR-378c, miR-93, miR-103b, miR-1306-5p, miR-134, miR-6516-5p, miR-378h, miR-107, miR-450a-2-3p, miR-1271-3p, miR-3065-3p, miR-199a-5p, miR-380-5p, miR-28b, miR-4286, miR-30a-3p, miR-1983, miR-335-3p, miR-136-5p, miR-504, miR-140-5p, miR-652-3p, miR-378g, miR-4792, miR-628-3p, miR-301a-5p, miR-218-5p, miR-423-5p, miR-361-3p, miR-9-5p, miR-3956-3p, miR-885-5p, miR-758-3p, miR-301b-5p, miR-147a, miR-496-5p, miR-181b-2-3p, miR-145b, miR-1343-3p, novel\_78, miR-214-3p, miR-199b-5p, miR-101-5p, miR-106b-5p, miR-378d, miR-124a, miR-1827, miR-

MYO1D      ENSOARGO(myosin I)

miR-541, miR-432, miR-329-3p, miR-873a-5p, miR-30b-3p, miR-16-1-3p, miR-29b, miR-138, miR-30b-3p, miR-362-3p, miR-103a-3p, miR-31-5p, miR-134-3p, miR-432-5p, miR-103, miR-2459, novel\_103, miR-29b-1-5p, novel\_19, miR-362-3p, miR-3085-3p, miR-1343-5p, miR-744-3p, miR-382, miR-432-3p, miR-432-3p, miR-361-3p, miR-3591-3p, miR-378j, miR-18a-3p, miR-107, miR-1291, miR-877-3p, miR-6395, miR-216b-3p, miR-10b, novel\_68, miR-139-5p, miR-4792, miR-3064-5p, miR-26b-5p, miR-7977, miR-3082-5p, miR-29a-3p, miR-378g, miR-203-3p, miR-6535, miR-29a, miR-335, miR-379-3p, novel\_1, miR-128-1-5p, miR-147-5p, miR-136-3p, miR-3956-3p, miR-335-5p, miR-541-3p, novel\_60, miR-2447, miR-17-3p, miR-29c-3p, miR-371b-3p, miR-2428, miR-134, miR-362-3p, miR-5703, miR-1197-5p, miR-2427, miR-2904, miR-1343-5p, miR-29d-3p, miR-582-3p, miR-411-3p, miR-16-1-3p, miR-133a-3p, miR-6517, miR-18a-3p, miR-1224-5p, miR-383-5p, miR-328-3p, miR-1247-5p, miR-134-5p, miR-26a-5p, miR-185-3p, miR-219b-5p, miR-30f, miR-17-3p, miR-543-5p, novel\_127, miR-107, miR-3064-5p, miR-29b-1-5p, miR-2285b, miR-1957a, novel\_39, miR-500a-3p, miR-329a, miR-767, miR-1827, miR-485-5p, miR-874-3p, miR-532-5p, miR-552-3p, miR-615-5p, miR-21-3p, miR-139-5p, miR-6130, miR-2284s, miR-204-3p, miR-29b-3p, miR-665, miR-17-3p, miR-767-5p, miR-664a, miR-138-5p, miR-134-5p, miR-874-5p, miR-500, miR-4492, miR-4510, miR-1306-5p, miR-425-5p, miR-6128, miR-6525, miR-20b-5p, miR-1814c, miR-876-3p, miR-345-5p, miR-93-5p, miR-18a, miR-17-5p, miR-2448-3p, miR-133c, miR-134-5p, miR-28-5p, miR-1306-3p, miR-378c, miR-181c-3p, miR-93, miR-1260b, miR-16-5p, miR-330-5p, miR-134, miR-582-3p, miR-134-5p, miR-2284z, miR-9-5p, miR-322-5p, miR-378h, miR-376a-5p, miR-18b-5p, miR-222, miR-152-3p, miR-1260a, miR-24-2-5p, miR-3529-3p, miR-378f, miR-195a-5p, miR-3065-5p, miR-148a-3p, miR-18b, miR-374c-3p, miR-3074-5p, miR-378b, miR-16a, miR-15a, miR-20a-5p, miR-326-3p, miR-2284w, miR-2285x, miR-495-3p, miR-342-3p, miR-497-5p, miR-7862, miR-2284x, miR-16b, miR-2284ab, miR-1260b, miR-181a-5p, miR-223-3p, miR-20b, miR-665, miR-466f-3p, miR-17-5p, miR-106a-5p, miR-224-5p, miR-377-3p, miR-345-5p, miR-2285r, miR-432-3p, let-7f-2-3p, let-7f-2-3p, miR-628-5p, miR-493-5p, miR-1895, let-7g-3p, miR-18a-5p, miR-345-5p, miR-15b-5p, miR-377-3p, miR-378a-3p, miR-424-5p, miR-487a-5p, miR-708-5p, miR-665, miR-338-5p, miR-222-3p, miR-181c-5p, miR-224-5p, miR-378c, miR-3074-5p, miR-378a-3p, miR-1197-5p, miR-378i, miR-376a-5p, miR-532-3p, miR-199a-3p, miR-7859, miR-23b-3p, miR-15a-5p, miR-148b-3p, miR-106a, miR-1277-5p, miR-30b-3p, miR-2284m, miR-106a, miR-466i-5p, miR-422a, miR-185-3p, miR-210-5p, miR-125b-2-3p, miR-20a, miR-493-5p, novel\_94, miR-181a-3p, miR-1306-3p, miR-221, miR-1185-2-3p, miR-378e, miR-24-1-5p, miR-9-5p, miR-212-3p, miR-2284aa, miR-1839-5p, miR-378c, miR-101a-5p, miR-2426, miR-323b, miR-378b, miR-143-5p, miR-221-3p, miR-1185-3p, miR-421, miR-2300a-5p, miR-323b-3p, miR-106b-5p, miR-16b, miR-342, miR-199a-3p, miR-326, novel\_103, miR-8485, miR-2310, miR-378d, miR-23a-3p, miR-376b, miR-424-5p, miR-106a-5p

LOXL2 ENSOARGO( lysyl ox

CRIM1 ENSOARGO( cysteine

miR-306b-3p, miR-1957a, miR-490-3p, miR-1271-3p, miR-49b-5p, miR-181a-2-3p, miR-2898, miR-450a-2-3p, let-7c-5p, miR-1271-5p, miR-222, miR-411-3p, let-7d, miR-134, miR-218-2-3p, miR-500b-5p, miR-145-3p, miR-138-5p, miR-486b-3p, miR-28-5p, miR-410-5p, miR-5100, miR-135a-5p, miR-34c-5p, miR-365a-3p, miR-370-3p, novel\_48, miR-485-5p, miR-362-5p, miR-3154, miR-382, miR-330-3p, miR-455-5p, miR-2285g, miR-432-5p, miR-185-5p, let-7g-5p, miR-544b, miR-133b-5p, miR-26b-3p, miR-138, miR-219a-1-3p, miR-455-5p, miR-1434-3p, novel\_27, miR-449a, miR-2428, miR-3957-3p, miR-2285x, novel\_101, miR-22-5p, miR-15a, miR-133a-5p, miR-34c, miR-16a, miR-382-5p, let-7i, miR-2404, miR-34b, miR-320b, miR-450b-3p, miR-1291, miR-7975, miR-195a-5p, miR-6395, miR-135b-5p, miR-2285ab, miR-2387, miR-34b-5p, miR-221-5p, miR-299-3p, miR-487a-3p, miR-15a-5p, miR-340-5p, miR-548e-3p, miR-3600, miR-485-3p, miR-941, let-7a-3p, novel\_133, miR-362-3p, miR-2300b-3p, miR-140-3p, let-7b-5p, miR-145a-3p, miR-1271, miR-425-5p, miR-3074-2-3p, miR-664a, miR-6516-3p, miR-424-5p, miR-708-5p, miR-222-3p, miR-544-3p, novel\_32, miR-204-3p, novel\_25, miR-877-5p, miR-221-5p, miR-3065-3p, miR-182-5p, miR-2312, let-7g-3p, let-7f-1-3p, miR-491-3p, let-7a-5p, miR-424-5p, miR-494-3p, let-7e, miR-2957, miR-362-3p, miR-142-3p, miR-500-5p, miR-9788-3p, miR-221-3p, miR-2285e, miR-2300a-5p, miR-2426, miR-450b-5p, miR-544a, miR-296-5p, miR-125b-2-3p, miR-362-5p, miR-2285f, miR-3958-3p, miR-2285t, miR-2285n, miR-2285y, miR-489, let-7d-5p, miR-20a-3p, miR-7977, miR-129b-5p, miR-148b-5p, let-7g, miR-2285b, miR-192-3p, let-7f-5p, miR-127-5p, novel\_96, miR-205-5p, miR-125a-3p, miR-3071-3p, miR-322-5p, miR-758-5p, miR-134-5p, miR-486-5p, miR-299a-3p, miR-2285ad, miR-431, miR-196a-5p, miR-3591-5p, miR-1197-3p, miR-16-5p, novel\_9, miR-134-5p, novel\_63, miR-2285p, miR-618, miR-376b-3p, miR-217, miR-500a-5p, miR-127-5p, miR-2484, miR-107, miR-345-3p, miR-181a-2-3p, miR-3064-5p, miR-450b-5p, miR-1197-5p, miR-330-5p, miR-217-5p, miR-218-2-3p, miR-142-3p, miR-15a-5p, miR-483-3p, miR-322-5p, miR-1306-3p, miR-3969, miR-664a-5p, miR-410-3p, miR-424-5p, miR-190a-5p, miR-214, miR-2330-3p, miR-16-5p, miR-338-3p, miR-2285c, miR-21a-3p, miR-129b-3p, miR-200a-5p, miR-503-3p, miR-21-3p, miR-216b-3p, miR-15b-5p, miR-326, miR-16b, miR-190a, miR-483-3p, miR-3085-3p, miR-103a-2-5p, miR-214-3p, miR-382-3p, miR-424-5p, let-7f-2-3p, miR-33a-5p, let-7f-2-3p, let-7c-3p, miR-16b, miR-188-5p, miR-21b, miR-497-5p, miR-103a-3p, miR-548w, miR-2300a-5p, miR-26b-3p, miR-376b-3p, miR-134-3p, miR-2285g, miR-2285e, miR-1185-3p, miR-103, miR-6238, novel\_116, miR-15a, miR-502-5p, miR-107-5p, miR-16a, miR-499a-5p, miR-3956-3p, novel\_60, miR-219b-3p, miR-190b-5p, miR-326-3p, miR-376b-3p, miR-1306-3p, miR-3591-3p, miR-107, miR-412-3p, miR-3963, miR-195a-5p, miR-1983, miR-376a-3p, miR-216b-3p, miR-3064-5p, novel\_68, miR-411b-3p, miR-378g, miR-376d, miR-1185-2-3p, miR-203-3p, miR-6535



miR-16-5p, miR-193a-5p, miR-2284v, miR-1260b, miR-6740-5p, miR-125b-5p, miR-2284k, miR-134-5p, miR-2355-5p, miR-125a, miR-503-3p, miR-874-3p, miR-376c-3p, miR-301, miR-1248, miR-345-5p, miR-2318, novel\_39, let-7g, miR-29a-5p, miR-450c-5p, miR-30f, miR-127-5p, let-7f-5p, novel\_79, miR-6517, miR-134-5p, miR-2284z, miR-129-1-3p, miR-322-5p, miR-193b-3p, miR-1839-3p, miR-2284w, miR-142b, miR-320c, miR-2319a, miR-378f, let-7e-5p, miR-412-3p, miR-628-5p, miR-432-3p, miR-432-3p, miR-2284l, novel\_51, miR-2411-3p, miR-193a-3p, miR-339-5p, miR-103a-3p, miR-3535, miR-3431, miR-19b-2-5p, miR-1843b-5p, miR-497-5p, miR-2284x, miR-16b, miR-16-1-3p, miR-665-5p, let-7b, miR-3184-3p, miR-129-2-3p, miR-181c-5p, miR-6525, miR-346, miR-665, let-7f, miR-874-5p, miR-130b-5p, miR-2331-3p, miR-504-5p, miR-30c-1-3p, miR-548o-3p, miR-15b-5p, let-7i-5p, miR-376e-3p, miR-2284s, miR-216b-5p, miR-299, miR-2285c, miR-186-5p, miR-345-5p, miR-339b, miR-345-3p, miR-2424, miR-486-3p, miR-143-3p, miR-324-3p, miR-422a, miR-345-3p, let-7k, miR-98-5p, miR-378a-3p, miR-217-5p, miR-378i, miR-1961, miR-133a-3p, miR-16-1-3p, novel\_73, miR-2284j, miR-2440, miR-2285u, miR-211-5p, miR-2319b, miR-2483-3p, miR-140-5p, miR-409-5p, miR-9-3p, miR-1983, miR-96-5p, miR-504, miR-136-5p, miR-378d, miR-323b-3p, miR-29b-1-5p, miR-16b, miR-145b, miR-548w, novel\_78, miR-455-3p, miR-147a, miR-1298-3p, miR-323b, miR-2284r, miR-1839-5p, miR-101c, miR-1388-5p, miR-6128, miR-1306-5p, miR-378c, miR-323-3p, miR-486b-3p, miR-204-5p, miR-370-3p, miR-154b-5p, miR-3154, miR-320a, miR-381-3p, miR-503-3p, miR-7144-5p, miR-4286, miR-30c-2-3p, let-7c-5p, miR-217, miR-339a, miR-1260a, miR-107, miR-543-5p, miR-17-3p, miR-2898, miR-181b-5p, miR-7641, miR-376a-5p, miR-378h, miR-6516-5p, miR-1271-5p, miR-345-3p, miR-134, miR-196, miR-300, let-7d, miR-17-

miR-30f, miR-205-5p, miR-125a-3p, miR-152-3p, miR-200a-3p, miR-3064-5p, novel\_39, miR-192-3p, miR-1343-5p, miR-330-5p, miR-1290, miR-30c, miR-155-5p, miR-412, miR-18b-5p, miR-134-5p, miR-505-5p, miR-322-5p, miR-125b-5p, miR-134-5p, miR-16-5p, miR-1197-3p, miR-1260b, miR-23b, miR-30e-5p, miR-329b, miR-329a, miR-345-5p, miR-2285aa, miR-125a, miR-1271, miR-874-3p, miR-133c, miR-365b-5p, miR-105-5p, miR-2411-3p, miR-194a, novel\_51, miR-377-3p, miR-378a-5p, miR-668-3p, miR-432-3p, miR-432-3p, miR-197-3p, miR-1843b-5p, miR-223-3p, miR-497-5p, miR-27b-3p, miR-16b, miR-381-5p, miR-31-5p, miR-103a-3p, miR-149-5p, miR-134-3p, miR-3431, miR-485-3p, miR-425-5p, miR-4324, miR-576-3p, miR-29a, miR-29c-3p, miR-199b-5p, miR-2284w, miR-1306, miR-3970, miR-216a-3p, miR-148a-3p, miR-378f, miR-410-5p, miR-412-3p, novel\_68, miR-329-5p, miR-6535, miR-677, miR-181b-3p, novel\_69, miR-324-3p, miR-422a, miR-345-3p, miR-92a-1-5p, miR-30b, miR-345-3p, miR-329a-5p, miR-486-3p, miR-143-3p, miR-181b-1-3p, miR-377-5p, miR-1434-5p, miR-378a-3p, miR-30c-5p, miR-378i, miR-133a-3p, miR-218-1-3p, miR-361-5p, miR-34a-5p, miR-493-3p, novel\_73, miR-328-3p, miR-23b-3p, miR-23c, miR-665, miR-500, miR-4492, miR-874-5p, miR-454-3p, miR-129-5p, miR-3958-5p, miR-665-5p, miR-214, miR-3184-3p, miR-181c-5p, miR-6525, miR-224-5p, miR-500a-3p, miR-30d-5p, miR-1895, miR-625-5p, miR-345-5p, miR-216b-3p, miR-296-3p, miR-504-5p, miR-2331-3p, miR-30c-1-3p, miR-15b-5p, miR-377-3p, miR-499b-3p, miR-2284s, miR-216b-5p, miR-29b-1-5p, miR-16b, miR-199b-5p, miR-214-3p, miR-381-5p, miR-103a-2-5p, miR-130b-3p, miR-23a-3p, miR-1388-3p, miR-127-3p, miR-8485, miR-378d, miR-329-3p, miR-2284r, miR-541, miR-362-3p, miR-181b-2-3p, miR-199b-3p, novel\_78, miR-1343-3p, miR-455-3p, miR-421, miR-2459, miR-1298-3p, miR-147a, novel\_82, miR-2440, miR-490-5p, miR-3968, miR-7705, miR-

miR-2285n, miR-2285y, miR-107-5p, miR-499a-5p, miR-6527, miR-9-5p, miR-129b-5p, miR-96-5p, miR-544-5p, novel\_94, miR-1983, miR-3064-5p, miR-2319b, miR-7689-3p, miR-2285u, miR-211-5p, miR-378e, miR-2483-3p, miR-1185-2-3p, novel\_103, miR-323b-3p, miR-29b-1-5p, miR-491-5p, miR-3085-3p, miR-103a-2-5p, miR-1468, miR-1388-3p, miR-376b, miR-652-5p, miR-378d, miR-491-3p, miR-2310, miR-484, miR-378b, miR-4791, miR-323b, miR-1a-3p, miR-30b-3p, miR-378c, miR-450b-5p, miR-2426, miR-101c, miR-21b, miR-1343-3p, miR-145b, miR-9788-3p, miR-455-3p, miR-216a-3p, miR-30e-3p, miR-30a-3p, miR-664a-5p, miR-29b-2-5p, miR-6516-3p, miR-17-3p, miR-129-5p, miR-487a-5p, miR-208b-5p, miR-378c, miR-3184-3p, miR-4510, miR-6525, miR-206-3p, novel\_44, miR-338-3p, miR-21a-3p, miR-433-3p, let-7g-3p, miR-345-5p, miR-140-5p, miR-378a-3p, miR-370-5p, miR-552-3p, miR-532-5p, miR-27a-5p, miR-6130, novel\_25, miR-2285p, miR-26a-5p, miR-92a-1-5p, miR-422a, miR-2284m, miR-299-3p, miR-329a-5p, miR-5100, miR-376a-5p, miR-664b-3p, miR-29b-1-5p, miR-377-5p, miR-486-3p, miR-2411, miR-378i, miR-193b-5p, miR-1197-5p, miR-378a-3p, miR-5703, miR-142-3p, miR-1b-3p, miR-30d-3p, novel\_83, miR-616-3p, miR-328-3p, miR-142b, miR-6402, miR-33a-3p, miR-6119-3p, miR-29a, miR-206, miR-656-5p, miR-502b, miR-147-5p, miR-1a-1-5p, miR-495-3p, miR-29c-3p, miR-17-3p, miR-2285x, miR-1193, miR-211, miR-3959-3p, novel\_27, miR-2387, miR-150-5p, miR-3970, miR-216a-3p, miR-378b, miR-450b-3p, miR-412-3p, miR-2319a, miR-6395, miR-378f, miR-6516-3p, miR-329-5p, miR-7-1-3p, miR-26b-5p, miR-3120-3p, miR-2404, miR-374c-3p, miR-670-3p, miR-299b-3p, miR-29a-3p, miR-669, miR-6535, miR-296-3p, miR-365b-5p, miR-483-3p, let-7f-2-3p, miR-654-3p, miR-2285r, miR-2284l, miR-296-3p, miR-345-5p, let-7a-2-3p, miR-503-3p, miR-2113, miR-3071-5p, miR-145a-5p, miR-374b-3p, miR-30b-3p, miR-29b, miR-

miR-93, miR-323-3p, miR-6740-5p, miR-26c, miR-409-3p, miR-410-3p, miR-138-5p, miR-2285aa, miR-133c, miR-376c-3p, miR-300-3p, miR-93-5p, miR-17-5p, miR-503-3p, miR-2448-3p, miR-23a-5p, miR-7144-5p, miR-20b-5p, miR-671-5p, miR-2474, miR-345-5p, miR-29b-2-5p, miR-3064-5p, miR-3065-3p, novel\_39, miR-490-3p, miR-192-3p, miR-2285b, miR-380-5p, miR-28b, miR-24-2-5p, miR-217, miR-2898, miR-17-3p, miR-127-5p, miR-181b-5p, miR-1224-5p, miR-450a-1-3p, miR-9-5p, miR-758-5p, miR-330-5p, miR-3591-5p, miR-196a-5p, miR-155-5p, miR-105-2, miR-411-3p, miR-193b-3p, miR-17-3p, miR-326-3p, miR-371b-3p, novel\_87, miR-6402, miR-28c, miR-20a-5p, miR-147-5p, miR-320b, miR-3120-3p, novel\_68, miR-144-3p, miR-411b-3p, miR-3065-5p, miR-7975, miR-146b-5p, miR-505-3p, miR-6395, miR-2285k, miR-363-5p, miR-380-5p, miR-6240, miR-345-5p, miR-654-3p, miR-330-3p, miR-105-5p, miR-17-5p, miR-106a-5p, miR-224-5p, miR-146a, miR-377-3p, miR-452-5p, miR-193a-3p, miR-196b-5p, novel\_116, miR-194-3p, miR-411-5p, miR-20b, miR-544b, miR-432-5p, miR-134-3p, miR-450c-3p, miR-197-3p, novel\_23, miR-432, miR-181a-5p, miR-2113, miR-26a-2-3p, miR-2889, miR-2284x, miR-138, miR-125b-1-3p, miR-145a-3p, miR-3184-5p, miR-181c-5p, miR-6525, miR-224-5p, miR-29b-2-5p, miR-208b-5p, miR-1468-5p, miR-4492, miR-450b-3p, miR-17-3p, miR-451a, miR-216b-3p, novel\_107, miR-3065-3p, miR-552-3p, miR-140-5p, miR-32-3p, miR-155-5p, miR-377-3p, miR-544-3p, miR-376e-3p, miR-193b-3p, miR-3613-5p, miR-450a-1-3p, miR-1827, miR-345-5p, miR-20a, miR-146a-5p, miR-2432, miR-2285i, miR-376c-3p, miR-142a-3p, miR-2484, miR-202-5p, miR-106a, miR-3600, miR-505-3p, miR-106a, miR-328-3p, miR-340-5p, miR-217-5p, miR-5703, miR-140-3p, miR-2366, miR-142-3p, miR-181d-5p, miR-9-5p, miR-32-3p, miR-541-3p, miR-212-3p, miR-423-5p, miR-8095, miR-877-3p, novel\_111, miR-2440, miR-101-3p, miR-109a-5p, miR-3958-

TNKS

ENSOARGO(tankyras)

miR-22-5p, miR-29a, miR-2428, miR-29c-3p, novel\_120, miR-335-5p, miR-2319a, miR-150-5p, miR-2404, miR-29a-3p, miR-655-5p, miR-7-1-3p, miR-452-5p, miR-124-5p, miR-190a, miR-194a, miR-2411-3p, miR-432-3p, miR-432-3p, miR-668-3p, miR-493-5p, miR-7862, miR-2284x, miR-29b, miR-21-5p, novel\_23, miR-374b-3p, miR-194-5p, miR-1843b-5p, novel\_116, miR-149-5p, miR-544b, miR-2284d, miR-3432a, miR-2284k, miR-29b-3p, miR-2332, miR-2284v, miR-1248, miR-10b-3p, miR-23b, miR-3154, miR-30e-5p, miR-324-5p, miR-2355-5p, miR-1271, miR-2898, miR-30f, miR-3064-5p, miR-30a-3p, miR-4286, miR-181a-2-3p, miR-30c, miR-29d-3p, miR-501-3p, miR-30a-5p, miR-345-3p, miR-545-5p, miR-129-1-3p, miR-6516-5p, miR-222, miR-3968, miR-335, miR-371a-5p, miR-30b-5p, miR-218-5p, miR-502-3p, novel\_111, miR-194b-5p, miR-190b-5p, miR-2284j, miR-4454, miR-2447, miR-493-5p, novel\_94, miR-129b-5p, miR-221, miR-652-3p, miR-500-3p, miR-7857-3p, miR-499a-3p, miR-2483-3p, miR-3064-5p, miR-20a-3p, miR-153-3p, miR-214-3p, miR-1185-5p, miR-3085-3p, miR-5126, miR-23a-3p, miR-450b-5p, miR-544a, miR-7857, miR-501-3p, miR-221-3p, miR-153, miR-1298-3p, miR-548w, novel\_78, miR-190a-5p, miR-129-5p, miR-874-5p, novel\_74, miR-664a, miR-487b-5p, miR-30a-3p, miR-222-3p, miR-2285j, miR-30e-3p, miR-214, miR-3184-3p, miR-4510, miR-129-2-3p, miR-30d-5p, miR-411, miR-204-3p, miR-877-5p, miR-6516, miR-499b-3p, miR-544-3p, miR-6130, miR-552-3p, miR-140-5p, miR-30b-3p, miR-3653-3p, miR-30d, miR-2284m, miR-202-5p, miR-345-3p, miR-30b, miR-2432, miR-345-3p, miR-218-1-3p, miR-1197-5p, miR-1193, miR-30c-5p, miR-2284h-5p, miR-23b-3p, miR-30d-3p

miR-363-5p, miR-668-3p, miR-130b-5p, miR-34b-5p, miR-432-3p, miR-224-5p, miR-503-5p, miR-377-3p, miR-1343-5p, miR-125a-5p, miR-660, miR-378a-5p, miR-483-3p, miR-339-5p, miR-31-5p, miR-340-3p, miR-194-3p, miR-412-5p, miR-503-5p, miR-134-3p, miR-197-3p, miR-22-3p, miR-708-3p, miR-1285, miR-27b-3p, miR-138, miR-2284ab, miR-30b-3p, miR-1260b, miR-17-3p, miR-1a-1-5p, miR-335-5p, miR-326-3p, miR-199b-5p, miR-24-3p, miR-1307-3p, miR-382-5p, miR-28c, miR-6529b, miR-133a-5p, miR-656-5p, miR-421-5p, miR-6123, miR-320b, miR-10a-5p, miR-216b-3p, miR-146b-3p, miR-299b-3p, miR-411b-3p, miR-670-3p, miR-3970, miR-1306, miR-18a-3p, miR-216a-3p, miR-2285ab, miR-2387, miR-9851-3p, miR-2319a, miR-135b-5p, miR-6395, miR-1291, miR-3064-5p, miR-30a-3p, miR-181a-2-3p, novel\_39, miR-3065-3p, miR-199a-5p, miR-490-3p, miR-28b, miR-339a, miR-1260a, miR-6119-5p, miR-200c, novel\_96, novel\_127, miR-450a-2-3p, miR-17-3p, miR-200c-3p, miR-1a-2-5p, miR-127-5p, novel\_79, miR-299a-3p, miR-429-3p, miR-2284z, miR-483-3p, miR-758-5p, miR-1343-5p, miR-330-5p, miR-615-3p, miR-200b-3p, miR-155-5p, miR-128-3p, miR-10a-5p, miR-144-5p, miR-1306-5p, miR-2284v, miR-1260b, miR-125b-5p, miR-135a-5p, miR-3969, miR-1-5p, miR-135a-1-3p, miR-592, miR-138-5p, miR-767-5p, miR-2355-5p, miR-370-3p, miR-2285aa, miR-615-5p, miR-125a, miR-874-3p, miR-199a-5p, miR-376c-3p, miR-424-3p, miR-7144-5p, miR-23a-5p, miR-485-5p, miR-876-3p, miR-767, miR-345-5p, miR-574-3p, miR-2330-5p, miR-8485, miR-1b-5p, miR-505, miR-29b-1-5p, miR-2957, miR-182-5p, miR-1306-5p, miR-326, miR-199b-5p, miR-103a-2-5p, miR-491-5p, miR-3085-3p, miR-25-5p, miR-3955-3p, miR-27a-3p, miR-2300a-5p, miR-1343-3p, miR-148b-5p, miR-216a-3p, miR-1298-3p, miR-30b-3p, miR-484, miR-296-5p, miR-143-5p, miR-10b, miR-2284aa, miR-3120-5p, miR-1388-5p, miR-2285f, miR-1296-5p, miR-32-3p, miR-3059-5p, miR-

miR-29a-5p, miR-2285b, miR-29b-2-5p, miR-30a-3p, miR-4286, miR-17-3p, miR-200c-3p, miR-127-5p, miR-200c, miR-2284z, miR-129-1-3p, miR-486-5p, miR-322-5p, miR-302a-5p, miR-758-5p, miR-378h, miR-299a-3p, miR-429-3p, miR-200b-3p, miR-128-3p, miR-582-3p, miR-345-3p, miR-378c, miR-16-5p, miR-144-5p, miR-2284v, miR-6740-5p, miR-144, miR-125b-5p, miR-100-3p, novel\_63, miR-410-5p, miR-2284k, miR-5100, miR-133c, miR-2284n, miR-34c-5p, miR-365a-3p, miR-370-3p, miR-125a, miR-3956, miR-487a-3p, miR-574-5p, miR-3068-3p, miR-874-3p, miR-376c-5p, miR-671-5p, miR-329b, miR-376c-5p, miR-488-3p, miR-6412, miR-432-3p, miR-2285r, miR-101-5p, miR-6240, miR-125a-5p, miR-466f-3p, miR-378a-5p, miR-124-5p, miR-330-3p, miR-2411-3p, miR-377-3p, miR-6238, miR-544b, miR-412-5p, miR-2284d, miR-185-5p, miR-26b-3p, miR-497-5p, miR-26a-2-3p, miR-27b-3p, miR-2284ab, miR-16b, miR-16-1-3p, miR-873a-5p, miR-RNF144B ENSOARGO(ring fin.653, miR-1434-3p, miR-449a, miR-371b-3p, miR-17-3p, miR-656-5p, miR-147-5p, miR-6119-3p, novel\_1, miR-34c, miR-16a, novel\_87, miR-15a, miR-144-3p, miR-670-3p, miR-299b-3p, miR-34b, miR-26b-5p, miR-329-5p, miR-378f, miR-195a-5p, miR-412-3p, miR-150-5p, miR-216a-3p, miR-376b-5p, miR-376a-5p, miR-376c-3p, miR-345-3p, miR-329a-5p, miR-183-5p, miR-487a, miR-34b-5p, miR-299-3p, miR-2284m, miR-466i-5p, miR-125b, miR-422a, miR-345-3p, miR-374a-5p, miR-26a-5p, miR-200b, miR-15a-5p, miR-30d-3p, miR-212-5p, miR-16-1-3p, miR-34a-5p, let-7a-3p, miR-142-3p, miR-98-3p, miR-1193, miR-378a-3p, miR-378i, miR-193b-5p, miR-1246, miR-376a-5p, miR-6525, miR-98-3p, miR-2330-3p, miR-378c, miR-539-5p, miR-129-2-3p, miR-145a-3p, miR-4510, miR-129-5p, miR-424-5p, miR-17-3p, miR-30a-3p, miR-29b-2-5p, miR-320e, let-7b-3p, miR-204-3p, miR-15b-5p, miR-377-3p, miR-544-3p, miR-6130, miR-216b-5p, miR-378a-3p, miR-548c-3p, miR-1827, miR-

miR-203b-5p, novel\_1, miR-34c, novel\_87, miR-449a, miR-2428, miR-301b-3p, miR-495-3p, miR-146b-5p, miR-6395, miR-1291, miR-107, miR-412-3p, miR-18a-3p, miR-18b, miR-320c, miR-146b-3p, miR-34b, miR-320b, miR-3120-3p, miR-216b-3p, miR-660, miR-330-3p, miR-365b-5p, novel\_51, miR-146a, miR-539-3p, miR-345-5p, miR-654-3p, miR-363-5p, let-7f-2-3p, let-7f-2-3p, miR-130b-5p, miR-6240, miR-7862, miR-2889, miR-381-5p, miR-22-3p, miR-873a-5p, miR-1843b-5p, miR-2113, miR-194-3p, miR-103, miR-185-5p, miR-3431, miR-130a-3p, miR-31-5p, miR-103a-3p, miR-486b-3p, miR-331-3p, miR-1306-3p, miR-365a-5p, miR-6128, miR-7144-5p, miR-671-5p, miR-485-5p, miR-876-3p, miR-329b, miR-345-5p, miR-320a, miR-18a, miR-154b-5p, miR-34c-5p, miR-2355-5p, miR-615-5p, miR-874-3p, miR-3068-3p, miR-107, novel\_127, miR-30c-2-3p, miR-3071-3p, miR-217, miR-2285af, miR-29b-2-5p, miR-181a-2-3p, miR-23b-5p, miR-1290, miR-129-1-3p, miR-9-5p, miR-2411-5p, miR-412, miR-18b-5p, miR-2285ad, miR-4726-5p, miR-1973, miR-2285y, miR-107-5p, miR-2285n, miR-9-5p, miR-541-3p, novel\_94, miR-1983, miR-504, miR-1306-3p, miR-361-3p, miR-409-5p, miR-1185-2-3p, miR-3596, miR-20a-3p, miR-146b, miR-381-5p, miR-103a-2-5p, miR-130b-3p, miR-505, miR-320b, miR-193a, miR-30c-1-3p, miR-574-3p, miR-494-3p, miR-412-3p, miR-125b-2-3p, miR-484, miR-296-5p, miR-541, miR-1185-3p, miR-2300a-5p, miR-330-3p, miR-151a-3p, miR-454-3p, miR-874-5p, miR-130b-5p, miR-6516-3p, miR-151-3p, miR-132-5p, miR-29b-2-5p, miR-320e, miR-346, miR-129-2-3p, miR-625-5p, miR-18a-5p, miR-345-5p, miR-433-3p, miR-21a-3p, miR-22-3p, novel\_32, miR-301a-3p, novel\_107, miR-552-3p, miR-221-5p, miR-30c-1-3p, miR-504-5p, miR-660-5p, miR-221-5p, miR-34b-5p, miR-21-3p, miR-320d, miR-216a-5p, miR-324-3p, novel\_17, miR-146a-5p, miR-2411, miR-486-3p, miR-2432, miR-125b-2-3p, miR-34a-5p, miR-1129, miR-5702, miR-1192, miR-188-3p, miR-493-5p, miR-505-3p, miR-3065-5p, miR-3591-3p, miR-21c, miR-320c, miR-203-3p, miR-1185-2-3p, miR-27a-3p, miR-499a-3p, miR-3082-5p, miR-199c, miR-6123, miR-4726-5p, miR-6402, miR-576-3p, miR-2284w, miR-452-5p, miR-3059-5p, miR-2284x, miR-27b-3p, miR-21-5p, miR-544a, miR-145a-5p, miR-708-3p, miR-6529a, miR-653, miR-411-5p, novel\_116, miR-148b-5p, miR-1185-3p, miR-544b, miR-665, miR-27a-3p, miR-222-5p, miR-145b, miR-199b-3p, novel\_4, miR-548w, miR-214-3p, miR-505, miR-2411-3p, miR-320b, novel\_115, miR-491-3p, let-7f-2-3p, let-7f-2-3p, miR-652-5p, miR-130b-5p, miR-493-5p, miR-582-5p, miR-133b-3p, let-7g-3p, miR-320a, miR-301, miR-499b-3p, miR-544-3p, miR-582-5p, miR-3965, miR-6130, miR-365a-3p, miR-21-3p, miR-216b-3p, miR-1271, miR-141-3p, miR-708-5p, miR-130b-5p, miR-28-5p, miR-324-3p, miR-665, miR-409-3p, miR-214, miR-133a-3p, miR-28a-3p, miR-4510, miR-142-3p, miR-4429, miR-23b-5p, miR-188-3p, miR-345-3p, miR-7859, miR-302a-5p, miR-758-5p, miR-3600, miR-505-3p, miR-200a-3p, miR-28-3p, miR-320d, miR-3071-3p, miR-345-3p, miR-196a-3p, miR-29a-5p, miR-2432, miR-148b-5p, miR-130a-5p



miR-668-3p, let-7c-3p, miR-124a, let-7j, miR-3187-3p, miR-2284l, miR-432-3p, miR-365b-5p, miR-1306-5p, miR-214-3p, miR-487b-5p, miR-3085-3p, miR-339-5p, novel\_78, miR-409b, miR-2300a-5p, miR-421, miR-2459, miR-149-5p, miR-9788-3p, miR-134-3p, miR-1298-3p, miR-412-5p, miR-3071-5p, miR-125b-2-3p, miR-30b-3p, miR-197-3p, miR-301b-5p, miR-2284r, miR-7862, miR-3120-5p, miR-1839-5p, miR-1260b, miR-30b-3p, miR-2284w, miR-8095, miR-361-3p, miR-301a-5p, miR-371a-5p, miR-615, miR-147-5p, miR-6123, miR-3964, miR-499a-5p, miR-128-1-5p, miR-7977, miR-541-5p, miR-3064-5p, miR-669, miR-411b-3p, miR-378g, miR-378j, miR-1306, miR-409-5p, miR-140-5p, miR-6395, miR-1983, miR-19a-3p, miR-412-3p, miR-1291, miR-3064-5p, miR-2285w, miR-3529-3p, miR-3956-5p, miR-143-3p, miR-486-3p, miR-339a, miR-3601, novel\_17, miR-210-5p, miR-125a-3p, miR-1260a, miR-221-5p, miR-6536, miR-99a-3p, novel\_79, miR-548e-3p, miR-129-1-3p, miR-328-3p, miR-151-5p, miR-1247-5p, miR-2284h-5p, miR-505-5p, miR-7859, miR-188-3p, miR-124-3p, miR-1290, miR-215-5p, miR-193b-5p, novel\_133, miR-615-3p, miR-361-5p, miR-19b-3p, miR-3074-2-3p, miR-214, miR-145a-3p, miR-129-2-3p, miR-338-3p, miR-365a-5p, miR-224-5p, miR-1260b, miR-6525, miR-99b-3p, miR-15b-3p, miR-592, miR-486b-3p, miR-28-5p, miR-708-5p, miR-4492, miR-215-5p, miR-99a-3p, miR-2285aa, miR-370-3p, miR-548o-3p, miR-221-5p, miR-151b, miR-216b-5p, miR-132-5p, miR-192-5p, miR-129b-3p, miR-1895, miR-625-5p, miR-339b

miR-3578, miR-23b-5p, miR-300, miR-885-3p, let-7a-2-3p, miR-128-3p, miR-423-3p, miR-222, miR-7641, miR-582-3p, miR-1a-2-5p, novel\_96, miR-543-5p, miR-3064-5p, miR-24-2-5p, miR-192-3p, miR-2284a, miR-2284y, miR-29a-5p, miR-381-3p, let-7g-3p, miR-329a, miR-876-3p, miR-1248, miR-1814c, miR-3074-1-3p, miR-2355-5p, miR-2285aa, miR-2284n, miR-2433, miR-29b-3p, miR-2284k, miR-1-5p, miR-409-3p, miR-144, miR-331-3p, miR-204-5p, miR-486b-3p, miR-410-3p, miR-2284v, miR-1306-5p, miR-3607-3p, miR-145a-5p, miR-197-3p, miR-16-1-3p, miR-29b, miR-2284ab, miR-27b-3p, miR-503-5p, miR-2284d, novel\_116, miR-194-3p, miR-146a, miR-377-3p, miR-503-5p, miR-330-3p, miR-452-5p, miR-6240, miR-101-5p, miR-382, miR-2285r, let-7a-2-3p, miR-6412, miR-2387, miR-3065-5p, miR-216a-3p, miR-150-5p, miR-146b-5p, miR-7-1-3p, miR-320b, miR-29a-3p, miR-181b-3p, miR-677, miR-144-3p, miR-382-5p, miR-29a, miR-6119-3p, miR-1a-1-5p, miR-342-3p, miR-376a-3p, novel\_101, miR-29c-3p, miR-495-3p, miR-2285x, miR-323c, miR-211, miR-2428, miR-374c-5p, miR-362-3p, miR-193b-5p, miR-188-3p, miR-140-3p, miR-98-3p, miR-2284u, let-7a-3p, miR-16-1-3p, miR-212-5p, miR-3600, miR-532-3p, miR-618, novel\_17, miR-92a-1-5p, miR-324-3p, miR-2284m, miR-202-5p, miR-503-5p, miR-216c-5p, miR-183-5p, miR-369-3p, miR-181b-1-3p, miR-29b-1-5p, miR-2424, miR-486-3p, miR-146a-5p, let-7f-1-3p, miR-655, novel\_99, miR-186-5p, miR-1895, miR-885-3p, miR-140-5p, miR-545-3p, miR-296-3p, miR-377-3p, miR-499b-3p, novel\_32, miR-222-3p, let-7b-3p, miR-655-3p, miR-664a, miR-6516-3p, miR-208b-5p, miR-346, novel\_44, miR-98-3p, miR-3184-5p, miR-1298-5p, miR-2284r, miR-329-3p, miR-299a-5p, miR-101a-5p, miR-362-3p, miR-1388-5p, miR-330-3p, miR-2300a-5p, miR-181b-2-3p, miR-27a-3p, miR-145b, miR-1185-3p, miR-9788-3p, miR-455-3p, miR-216a-3p, miR-221-3p, miR-242, miR-29b-1-5p, miR-362-3p, miR-3085-5p, miR-3085-3p, miR-491-5p, miR-1185-5p, miR-146b, miR-452-5p, miR-146a, miR-326, miR-505, miR-30c-1-3p, miR-378d, miR-127-3p, miR-380-3p, miR-30b-3p, miR-378c, miR-378b, miR-223-3p, miR-1285, miR-30b-3p, miR-134-3p, miR-147a, miR-185-5p, miR-9788-3p, miR-31-5p, novel\_4, miR-1343-3p, miR-181b-2-3p, novel\_1, miR-6123, miR-4324, novel\_82, miR-218-5p, miR-371b-3p, miR-24-3p, miR-423-5p, miR-326-3p, miR-154a, miR-219b-3p, novel\_101, miR-1193, miR-495-3p, miR-146b-5p, miR-378f, miR-361-3p, miR-2387, miR-18a-3p, miR-378e, miR-378g, miR-2483-3p, miR-677, miR-181b-3p, miR-3064-5p, miR-378b, miR-3120-3p, miR-2898, miR-466i-5p, novel\_127, novel\_96, miR-21-3p, miR-30c-2-3p, miR-422a, miR-450b-5p, miR-125b-2-3p, miR-181b-1-3p, miR-486-3p, novel\_39, miR-146a-5p, miR-29a-5p, miR-3064-5p, miR-664-5p, miR-378i, miR-2366, miR-330-5p, miR-378a-3p, miR-378h, miR-582-3p, miR-151-5p, miR-18a-3p, novel\_9, miR-4492, miR-874-5p, miR-486b-3p, miR-370-5p, miR-100-3p, miR-6740-5p, miR-3969, miR-320e, miR-6525, miR-2903, miR-3184-5p, miR-378c, miR-1306-5p, miR-378c, miR-539-5p, miR-4510, miR-193a-5p, miR-133a-3p, miR-665-5p, miR-133b-3p, miR-1827, miR-3154, miR-6130, miR-151b, miR-378a-3p, miR-30c-1-3p, miR-874-3p, miR-370-5p

NR2F2 ENSOARGO(nuclear

RHOBTB2 ENSOARGO(Rho-rela

miR-33b-3p, miR-362-3p, miR-1197-5p, miR-217-5p, miR-188-3p, miR-7859, miR-23b-3p, miR-23c, miR-148b-3p, miR-2284h-5p, miR-106a, miR-106a, miR-221-5p, miR-299-3p, miR-196a-3p, miR-618, miR-324-3p, miR-345-3p, miR-29b-1-5p, miR-181b-1-3p, miR-2424, miR-2285w, miR-20a, miR-2312, miR-339b, miR-345-5p, miR-2285c, miR-377-3p, miR-155-5p, miR-221-5p, miR-504-5p, miR-496-3p, miR-21-3p, miR-182-5p, miR-664a, miR-155-5p, miR-129-5p, miR-208b-5p, miR-130b-5p, miR-2285j, miR-29b-2-5p, miR-6134, miR-1271, miR-362-3p, miR-2426, miR-16-2-3p, miR-296-5p, miR-329-3p, miR-1298-5p, miR-7857, miR-455-3p, miR-2459, miR-2285e, miR-330-3p, miR-2300a-5p, miR-181b-2-3p, miR-3085-3p, miR-1306-5p, miR-326, miR-362-3p, miR-29b-1-5p, miR-106b-5p, miR-182-5p, miR-8485, miR-106a-5p, miR-2330-5p, miR-494-3p, miR-23a-3p, miR-96-5p, miR-668-5p, miR-504, miR-877-3p, miR-361-3p, miR-3596, miR-2483-3p, miR-3082-5p, miR-3064-5p, miR-2319b, miR-499b-5p, miR-2285u, miR-3968, novel\_82, miR-2285n, miR-371a-5p, miR-361-3p, miR-2285f, miR-155-5p, miR-496, miR-345-3p, miR-330-5p, miR-1271-5p, miR-2285ad, miR-299a-3p, novel\_79, miR-7641, miR-196a-2-3p, miR-2898, miR-200a-3p, miR-152-3p, miR-205-5p, miR-1260a, miR-2285af, miR-217, miR-339a, miR-28b, miR-200a, miR-3064-5p, miR-29b-2-5p, miR-345-5p, miR-329a, miR-3074-1-3p, miR-7144-5p, novel\_48, miR-20b-5p, miR-485-5p, miR-488-3p, miR-301, miR-93-5p, miR-17-5p, miR-324-5p, miR-3068-3p, miR-503-3p, miR-2285aa, miR-2355-5p, miR-141-3p, novel\_63, miR-144, miR-93, miR-1197-3p, miR-1260b, miR-145-3p, miR-1306-5p, novel\_42, miR-1260b, miR-455-5p, miR-744-5p, miR-1434-3p, miR-3071-5p, miR-2285g, novel\_116, miR-2355-3p, miR-20b, miR-339-5p, miR-466f-3p, miR-377-3p, miR-330-3p, miR-106a-5p, miR-17-5p, miR-455-5p, miR-2411-3p, miR-345-5p, miR-130b-5p, miR-6240, miR-363-5p, miR-150b-3p, miR-9851, miR-204-3p, miR-216b-5p, miR-3431, miR-141-3p, miR-2447, novel\_4, miR-129-5p, miR-103a-2-5p, miR-200a-3p, miR-450b-3p, miR-107-5p, miR-18a-3p, miR-3065-5p, miR-195a-5p, miR-320b, miR-320c, miR-2440, miR-15a, miR-382-5p, miR-16a, miR-92a-3p, miR-199c, miR-2285t, miR-363-3p, miR-2447, miR-194b-5p, miR-1839-3p, novel\_111, miR-24-3p, miR-1434-3p, miR-19b-2-5p, miR-329-3p, miR-3962, miR-194-5p, miR-450b-5p, miR-101a-5p, miR-219a-1-3p, miR-16b, miR-362-3p, miR-3120-5p, miR-497-5p, miR-133b-5p, miR-199b-3p, novel\_4, miR-2320-3p, miR-142-5p, miR-320b, miR-199a-3p, miR-194a, miR-16b, miR-32, miR-362-3p, miR-196b-5p, miR-1839-3p, miR-494-3p, miR-101b-3p, miR-424-5p, miR-23a-3p, miR-101-5p, miR-22841, miR-8485, miR-21a-3p, miR-23b, miR-411, miR-320a, miR-329a, miR-3074-1-3p, miR-874-3p, miR-545-3p, miR-32-5p, miR-141-3p, miR-25-3p, miR-6516, miR-300-3p, miR-15b-5p, miR-204-3p, miR-3969, miR-320e, miR-3604, miR-19b-1-5p, miR-100-3p, miR-424-5p, miR-208b-5p, miR-16-5p, miR-142a-5p, miR-2366, miR-362-3p, miR-196a-5p, miR-4429, miR-218-1-3p, miR-18a-3p, miR-548e-3p, miR-15a-5p, miR-6516-5p, miR-23c, miR-23b-3p, miR-322-5p, miR-7859, miR-199a-3p, miR-320d, novel\_127, miR-92a-3p, miR-200a-3p, miR-21-3p, miR-3653-3p, miR-3529-3p, miR-216c-5p, miR-92b-3p, miR-490-3p, miR-192-3p, miR-1957a, miR-200a

MYO1 ENSOARGO(myomesin miR-1306-5p, miR-466f-3p  
 miR-228br, miR-2284l, miR-378a-5p, miR-193a-3p, miR-296-  
 3p, miR-365b-5p, miR-343l, miR-134-3p, miR-194-  
 3p, novel\_116, miR-31-5p, miR-103a-3p, miR-339-5p, miR-  
 16b, miR-16-1-3p, miR-497-5p, miR-2284x, miR-432, miR-1843b-  
 5p, miR-542-3p, miR-223-3p, miR-450c-3p, novel\_23, miR-376a-  
 3p, miR-193b-3p, miR-28c, miR-374c-3p, miR-299b-3p, miR-144-  
 3p, miR-3074-5p, miR-2319a, miR-148a-3p, miR-216a-3p, miR-  
 450b-5p, miR-200a, miR-3064-5p, miR-200a-  
 3p, novel\_96, novel\_127, miR-152-3p, miR-9-5p, miR-322-5p, miR-  
 2284z, miR-450a-1-3p, miR-134-5p, miR-299a-3p, miR-  
 2285ad, miR-429-3p, novel\_79, miR-431, miR-18b-5p, miR-  
 1290, miR-1343-5p, miR-2427, miR-23b-5p, miR-330-5p, miR-16-  
 5p, novel\_9, miR-592, miR-134-5p, novel\_63, miR-125b-5p, miR-  
 574-5p, miR-2285aa, miR-2355-5p, miR-125a, miR-345-5p, miR-  
 23b, miR-8485, miR-101b-3p, miR-23a-3p, miR-491-5p, miR-214-  
 3p, miR-103a-2-5p, miR-431-5p, miR-29b-1-5p, miR-323b-3p, miR-  
 16b, miR-182-5p, miR-147a, miR-455-3p, miR-1185-3p, miR-  
 2459, miR-126a-5p, miR-199b-3p, miR-21b, miR-301b-5p, miR-  
 541, miR-323b, miR-423-5p, miR-2447, miR-3956-3p, miR-9-  
 5p, miR-3968, novel\_82, miR-301a-5p, miR-378g, miR-3596, miR-  
 1185-2-3p, miR-139-5p, miR-2319b, miR-374b-5p, miR-211-  
 5p, miR-3963, miR-96-5p, miR-504, miR-335-3p, miR-140-5p, miR-  
 409-5p, miR-377-5p, miR-142a-3p, miR-2424, miR-486-3p, miR-  
 195a-3p, miR-345-3p, novel\_17, miR-324-3p, miR-92a-1-5p, miR-  
 23b-3p, miR-7859, miR-23c, miR-18a-3p, miR-493-  
 3p, novel\_73, miR-33b-3p, miR-218-1-3p, miR-16-1-3p, miR-34a-  
 5p, miR-193b-5p, miR-217-5p, miR-6525, miR-769-5p, miR-224-  
 5p, miR-3184-5p, miR-3184-3p, miR-3074-5p, miR-214, miR-874-  
 5p, miR-1468-5p, miR-151-3p, miR-665, miR-10a, miR-216b-  
 5p, miR-15b-5p, miR-504-5p, miR-216b-3p, miR-552-3p, miR-296-  
 3p, miR-329b, miR-345-5p, miR-186-5p, miR-200, miR-2285c, miR-

FHAD1 ENSOARGO(forkhead

AK9

ENSOARGO(adenylat

miR-1468-5p, miR-424-5p, miR-129-5p, miR-6516-3p, miR-3604, miR-29b-2-5p, miR-6134, miR-145a-3p, miR-186-5p, miR-2285c, miR-15b-5p, miR-2331-3p, miR-660-5p, miR-320d, miR-345-3p, miR-26a-5p, miR-486-3p, miR-664b-3p, miR-376c-3p, miR-195a-3p, miR-369-3p, miR-216c-5p, miR-4429, miR-142-3p, miR-217-5p, miR-1197-5p, miR-140-3p, miR-5703, miR-199a-3p, miR-23b-3p, miR-200b, miR-15a-5p, miR-23c, miR-30d-3p, miR-382-3p, miR-9-3p, miR-8095, miR-3059-5p, miR-335-3p, miR-9-3p, miR-203-3p, miR-499b-5p, miR-541-5p, miR-126b-5p, miR-211-5p, miR-2284g, miR-3064-5p, miR-1468, miR-3085-3p, miR-3955-3p, miR-16b, miR-320b, miR-199a-3p, miR-8485, miR-2310, miR-23a-3p, miR-424-5p, miR-382-3p, miR-16-2-3p, miR-1388-5p, miR-30b-3p, miR-484, miR-4791, miR-9788-3p, miR-455-3p, miR-2285e, miR-376b-3p, miR-222-5p, novel\_78, miR-486b-3p, miR-134-5p, miR-135a-5p, miR-409-3p, miR-3969, miR-145-3p, miR-3607-3p, miR-193a-5p, miR-16-5p, miR-3074-1-3p, miR-1814c, miR-137-3p, miR-376c-5p, miR-320a, miR-23b, miR-3154, miR-370-3p, miR-1271, miR-874-3p, miR-127-5p, miR-200c-3p, miR-217, miR-205-5p, miR-376b-3p, miR-200c, novel\_39, miR-2284a, miR-490-3p, miR-495-5p, miR-3064-5p, miR-29b-2-5p, miR-2385-3p, miR-181a-2-3p, miR-200b-3p, miR-345-3p, miR-134, miR-134-5p, novel\_121, miR-322-5p, miR-758-5p, miR-7641, miR-429-3p, miR-656-5p, miR-22-5p, miR-147-5p, novel\_1, miR-16a, miR-15a, miR-2428, miR-211, miR-195a-5p, miR-135b-5p, miR-6516-3p, miR-376b-5p, miR-320c, miR-2404, miR-26b-5p, miR-660, miR-2411-3p, miR-503-3p, miR-497-5p, miR-2284x, miR-188-5p, miR-16b, miR-30b-3p, miR-219a-1-3p, miR-653, miR-412-5p, miR-3535, miR-3431, miR-665, miR-31-5p

miR-639b, miR-135b-5p, let-7e-5p, miR-379-5p, miR-450b-3p, miR-1291, miR-21c, miR-3970, miR-1306, miR-18b, miR-148a-3p, miR-181b-3p, miR-144-3p, miR-677, miR-299b-3p, miR-670-3p, miR-2404, miR-26b-5p, miR-3120-3p, miR-3074-5p, miR-147-5p, novel\_1, let-7i, miR-576-3p, miR-20a-5p, miR-2284w, miR-326-3p, novel\_27, miR-371b-3p, miR-211, miR-3957-3p, miR-135a-2-3p, miR-27b-3p, miR-7862, miR-455-5p, miR-1260b, miR-542-3p, miR-223-3p, miR-181a-5p, miR-2355-3p, miR-20b, miR-411-5p, novel\_116, let-7g-5p, miR-134-3p, miR-2284d, miR-26b-3p, miR-665, miR-187-3p, miR-452-5p, miR-483-3p, miR-378a-5p, novel\_51, miR-106a-5p, miR-455-5p, miR-2411-3p, miR-17-5p, miR-330-3p, miR-224-5p, miR-432-3p, let-7f-2-3p, let-7f-2-3p, miR-363-5p, miR-6240, miR-671-5p, novel\_48, miR-20b-5p, miR-18a, miR-17-5p, miR-93-5p, miR-2284n, miR-324-5p, miR-1271, miR-615-5p, miR-370-3p, miR-874-3p, miR-592, miR-134-5p, miR-204-5p, novel\_9, miR-409-3p, miR-135a-5p, miR-144, miR-331-3p, miR-6740-5p, miR-5100, miR-2284k, miR-1260b, miR-93, miR-1306-5p, let-7d, miR-330-5p, miR-134, miR-345-3p, miR-545-5p, miR-134-5p, miR-582-3p, miR-758-5p, miR-483-3p, miR-2411-5p, miR-1271-5p, miR-9-5p, miR-18b-5p, miR-412, miR-2285ad, miR-299a-3p, miR-152-3p, miR-543-5p, let-7f-5p, miR-127-5p, miR-181b-5p, miR-450a-2-3p, let-7c-5p, miR-30c-2-3p, miR-205-5p, miR-1260a, miR-2284a, let-7g, miR-2284y, miR-181a-2-3p, miR-136-5p, miR-96-5p, miR-140-5p, miR-361-3p, miR-27a-3p, miR-1185-2-3p, miR-203-3p, let-7d-5p, miR-25, miR-3596, miR-378g, miR-211-5p, miR-2319b, miR-139-5p, miR-2284g, miR-107-5p, miR-371a-5p, miR-2285y, miR-423-5p, miR-1285-5p, miR-181d-5p, miR-9-5p, miR-2284j, miR-3120-5p, miR-1839-5p, miR-101a-5p, miR-450b-5p, miR-412-3p, miR-484, miR-296-5p, miR-1185-3p, miR-2459, miR-148b-5p, miR-539-5p, miR-1292-3p, miR-181b-2-3p, miR-27a-3p, novel\_4, miR-1243-3p, miR-

let-7a-5p, miR-33a-5p, miR-491-3p, miR-3187-3p, miR-326, novel\_115, miR-1306-5p, miR-320b, miR-3955-3p, miR-487b-5p, miR-3085-3p, miR-491-5p, miR-103a-2-5p, let-7e, miR-27a-3p, miR-181b-2-3p, miR-142-3p, miR-455-3p, miR-9788-3p, miR-148b-5p, miR-30b-3p, miR-101a-5p, miR-1388-5p, miR-101c, miR-212-3p, miR-2447, miR-2284j, miR-6527, miR-423-5p, miR-30b-5p, miR-107-5p, miR-2285t, miR-10b, miR-452-3p, miR-20a-3p, miR-139-5p, miR-2284g, miR-3064-5p, miR-7977, miR-499b-5p, miR-7689-3p, miR-7857-3p, miR-378g, miR-27a-3p, miR-4443, let-7d-5p, miR-9-3p, miR-345-3p, miR-195a-3p, miR-142a-3p, miR-181b-1-3p, miR-376a-5p, miR-486-3p, miR-2432, miR-26a-5p, miR-30b, miR-185-3p, miR-98-5p, miR-466i-5p, miR-320d, let-7k, miR-30d, miR-30b-3p, miR-383-5p, miR-95-3p, miR-210-3p, miR-2300b-3p, miR-1961, miR-193b-5p, miR-30c-5p, novel\_133, miR-5703, miR-4429, miR-19b-3p, miR-148a-5p, miR-361-5p, miR-218-1-3p, miR-129-2-3p, miR-145a-3p, let-7b, miR-425-5p, miR-338-3p, let-7b-5p, miR-3184-5p, miR-15b-3p, let-7f, miR-320e, miR-17-3p, miR-487b-5p, miR-450b-3p, miR-2331-3p, miR-296-3p, miR-139-5p, miR-582-5p, miR-377-3p, let-7i-5p, miR-204-3p, miR-450a-1-3p, miR-299, miR-30d-5p, miR-487b-5p, miR-30f, miR-582-5p, miR-543-3p, miR-625-5p, miR-382, miR-2483-5p, miR-668-3p, miR-363-5p, miR-432-3p, miR-2284l, miR-432-3p, miR-377-3p, miR-134-3p, let-7g-5p, miR-3431, miR-1843b-5p, miR-873a-5p, miR-374b-3p, miR-450c-3p, miR-138, miR-30b-3p, miR-2284ab, miR-188-5p, miR-27b-3p, miR-17-3p, miR-2428, miR-326-3p, let-7i, miR-33a-3p, miR-425-5p, miR-379-3p, miR-502b, miR-656-5p, miR-203b-5p, miR-216b-3p, miR-26b-5p, miR-181b-3p, miR-320c, miR-677, miR-6535, miR-1306, miR-19a-3p, miR-450b-3p, let-7e-5p, miR-135b-5p, miR-6516-3p, miR-3064-5p, miR-148b-5p, miR-2284a, miR-3956-5p, novel\_39, let-7g, miR-376c-5p, miR-376b-5p, let-7c, miR-130b-3p, miR-320d, miR-153-3p, miR-320b, miR-224-5p, miR-217, miR-500a-5p, miR-181b-1-3p, miR-494-3p, miR-124a, miR-345-3p, miR-101-5p, miR-20a, miR-195a-3p, miR-101a-5p, miR-4429, miR-2284r, miR-125b-2-3p, miR-217-5p, miR-124-3p, miR-153, miR-26b-3p, miR-3600, miR-130a-3p, miR-502b, miR-454-3p, miR-6402, miR-370-5p, miR-142b, miR-20a-5p, miR-371a-5p, miR-224-5p, miR-323-3p, miR-301b-3p, miR-1193, miR-103b, miR-6516-3p, miR-9-3p, novel\_48, miR-320a, miR-139-5p, miR-301a-3p, miR-499b-3p, miR-300-3p, miR-499a-3p, miR-181b-3p, miR-677, miR-203-3p, miR-223-5p, miR-320c, miR-3068-3p, miR-20a-3p, miR-139-5p, miR-370-5p

DYDC2 ENSOARGO(DPY30 do)

SPOPL ENSOARGO(speckle)

miR-2411, miR-29b-1-5p, miR-216c-5p, miR-299-3p, miR-221-5p, miR-34b-5p, miR-760-3p, miR-466i-5p, miR-320d, miR-125b, novel\_83, miR-532-3p, miR-148b-3p, miR-222-5p, miR-200b, miR-15a-5p, miR-383-5p, miR-4429, miR-19b-3p, miR-140-3p, miR-5703, miR-2904, miR-215-5p, miR-2300b-3p, novel\_133, miR-6134, miR-206-3p, miR-10b-5p, miR-3074-2-3p, miR-4510, miR-708-5p, miR-424-5p, miR-6516-3p, miR-17-3p, miR-450b-3p, miR-29b-2-5p, miR-19b-1-5p, miR-132-5p, miR-22-3p, miR-204-3p, miR-323-5p, miR-139-5p, miR-6130, miR-544-3p, miR-132-5p, miR-192-5p, miR-3065-3p, miR-21-3p, miR-221-5p, miR-582-5p, novel\_99, miR-18a-5p, miR-2312, miR-133b-3p, miR-21a-3p, miR-193a, miR-3187-3p, miR-1839-3p, miR-424-5p, miR-382-3p, miR-2957, miR-1306-5p, miR-320b, miR-9788-3p, miR-216a-3p, miR-27a-3p, miR-222-5p, miR-3120-5p, miR-544a, miR-7857, miR-143-5p, miR-10b, miR-484, miR-154a, miR-219a-2-3p, miR-452-5p, miR-181d-5p, miR-2285f, miR-541-3p, novel\_60, miR-2284q, miR-7134-3p, miR-2285t, miR-2285y, miR-27a-3p, miR-3082-5p, miR-7857-3p, miR-20a-3p, miR-199b-5p, miR-361-3p, miR-199a-5p, miR-3065-3p, miR-380-5p, miR-2403, miR-181a-2-3p, miR-29b-2-5p, miR-1, miR-30a-3p, miR-543-5p, miR-107, miR-181b-5p, miR-200c-3p, miR-2898, miR-17-3p, miR-217, miR-200c, miR-1260a, miR-214-5p, miR-2411-5p, let-7a-2-3p, miR-10a-5p, miR-200b-3p, miR-582-3p, miR-134, miR-345-3p, miR-133a-3p, miR-6128, miR-3607-3p, miR-1306-5p, miR-204-5p, miR-486b-3p, miR-28-5p, miR-138-5p, miR-5100, miR-199a-5p, miR-34c-5p, miR-374c-3p, miR-141-3p, miR-215-5p, miR-1814c, miR-671-5p, let-7g-3p, miR-320a, miR-18a, miR-3154, miR-2448-3p, miR-345-5p, miR-125a-5p, miR-330-3p, miR-190a, miR-503-5p, miR-544b, miR-103, miR-503-5p, miR-185-5p, miR-432-5p, miR-130a-3p, miR-219a-1-3p, miR-1260b, miR-138, miR-380-3p, miR-374b-3p, miR-1434, miR-486b-3p, miR-208b-5p, novel\_74, miR-2285y, miR-125b-5p, miR-331-3p, miR-324-3p, miR-3184-5p, miR-423-5p, miR-326-3p, miR-361-3p, miR-1271, miR-6395, miR-1291, miR-96-5p, miR-301, miR-454-5p, miR-670-3p, miR-378g, miR-3956, miR-125a, miR-125a-5p, miR-125b, miR-92a-1-5p, novel\_51, miR-326, miR-143-3p, miR-486-3p, miR-376b-5p, miR-2330-5p, miR-330-5p, miR-328-3p, miR-134-3p, miR-1271-5p, miR-1343-3p, miR-2285ad

SNAP25 ENSOARGO(synaptos) miR-3141, miR-1306-5p, miR-361-3p, miR-3154, miR-1306, miR-3141, novel\_42, miR-361-3p, miR-151b, miR-151-5p

CDC42BPG ENSOARGO(CDC42 bi) miR-2331-3p, miR-615-5p, miR-7977, miR-2355-5p, miR-2285aa, miR-6130, novel\_69, miR-193b-3p, miR-378g, miR-151b, miR-488-3p, miR-361-3p, miR-133b-3p, miR-671-5p, miR-146b-5p, miR-4510, miR-28a-3p, miR-495-3p, miR-133a-3p, miR-193b-3p, miR-206-3p, miR-326-3p, miR-6529b, miR-28c, miR-206, miR-4726-5p, miR-134-5p, miR-486b-3p, miR-874-5p, miR-134-3p, miR-2459, miR-148b-5p, miR-9788-3p, novel\_83, miR-151-5p, miR-134-5p, miR-194-3p, miR-134, miR-1285, miR-2300b-3p, miR-330-5p, miR-1a-3p, miR-33b-3p, miR-148a-5p, miR-378d, miR-2330-5p, miR-1, miR-148b-5p, miR-28b, miR-143-3p, miR-1271-3p, miR-486-3p, miR-146a-5p, miR-326, miR-146a, miR-196a-3p, miR-2957, miR-1185-5p, miR-28-3p, miR-193a-3p, miR-146b

DMPK ENSOARGO(dystroph) miR-134-3p, miR-2459, miR-148b-5p, miR-9788-3p, novel\_83, miR-151-5p, miR-134-5p, miR-194-3p, miR-134, miR-1285, miR-2300b-3p, miR-330-5p, miR-1a-3p, miR-33b-3p, miR-148a-5p, miR-378d, miR-2330-5p, miR-1, miR-148b-5p, miR-28b, miR-143-3p, miR-1271-3p, miR-486-3p, miR-146a-5p, miR-326, miR-146a, miR-196a-3p, miR-2957, miR-1185-5p, miR-28-3p, miR-193a-3p, miR-146b

SLC38A3 ENSOARGO(solute c) miR-134-3p, miR-2459, miR-148b-5p, miR-9788-3p, novel\_83, miR-151-5p, miR-134-5p, miR-194-3p, miR-134, miR-1285, miR-2300b-3p, miR-330-5p, miR-1a-3p, miR-33b-3p, miR-148a-5p, miR-378d, miR-2330-5p, miR-1, miR-148b-5p, miR-28b, miR-143-3p, miR-1271-3p, miR-486-3p, miR-146a-5p, miR-326, miR-146a, miR-196a-3p, miR-2957, miR-1185-5p, miR-28-3p, miR-193a-3p, miR-146b



|         |                     |                                                                                                                                                                                                                                                                                                                                                                                                                                                                                                                                                                                                                                                                                                                                                                                                                                                                                                                                                                                                                                                                                                                                                                                                                                                                                                                                                                                                                                                                                                                                                                                                                                                                                                                                                                                                                                                                                                                                                                                                                                                                                                                                                                                                                                                                                                                                                    |
|---------|---------------------|----------------------------------------------------------------------------------------------------------------------------------------------------------------------------------------------------------------------------------------------------------------------------------------------------------------------------------------------------------------------------------------------------------------------------------------------------------------------------------------------------------------------------------------------------------------------------------------------------------------------------------------------------------------------------------------------------------------------------------------------------------------------------------------------------------------------------------------------------------------------------------------------------------------------------------------------------------------------------------------------------------------------------------------------------------------------------------------------------------------------------------------------------------------------------------------------------------------------------------------------------------------------------------------------------------------------------------------------------------------------------------------------------------------------------------------------------------------------------------------------------------------------------------------------------------------------------------------------------------------------------------------------------------------------------------------------------------------------------------------------------------------------------------------------------------------------------------------------------------------------------------------------------------------------------------------------------------------------------------------------------------------------------------------------------------------------------------------------------------------------------------------------------------------------------------------------------------------------------------------------------------------------------------------------------------------------------------------------------|
| SMAD9   | ENSOARGOC SMAD fam  | <p>miR-181b-2-3p, miR-27a-3p, miR-216a-3p, miR-378b, miR-1a-3p, miR-450b-5p, miR-378c, miR-106a-5p, miR-378d, miR-2310, miR-8485, miR-326, miR-320b, miR-106b-5p, miR-214-3p, miR-499b-5p, miR-378e, miR-7857-3p, miR-27a-3p, miR-203-3p, miR-212-3p, miR-452-5p, miR-2285f, miR-6527, miR-1973, miR-490-5p, miR-2285t, miR-106a, miR-18a-3p, miR-222-5p, miR-210-3p, miR-328-3p, novel_83, miR-532-3p, miR-1246, miR-378i, miR-126-3p, miR-378a-3p, miR-188-3p, miR-4429, miR-329a-5p, miR-345-3p, miR-20a, miR-181b-1-3p, miR-664b-3p, miR-146a-5p, miR-210-5p, miR-374a-5p, miR-422a, miR-320d, miR-106a, miR-21-3p, miR-378a-3p, miR-532-5p, miR-3065-3p, miR-370-5p, miR-193b-3p, miR-6516, miR-22-3p, miR-450a-1-3p, miR-21a-3p, miR-2312, miR-378c, miR-214, miR-206-3p, miR-338-5p, miR-665, miR-324-3p, miR-450b-3p, miR-187-3p, miR-26b-3p, miR-149-5p, miR-708-3p, novel_23, miR-3071-5p, miR-450c-3p, miR-22-3p, miR-27b-3p, miR-455-5p, miR-2285r, miR-17-5p, miR-106a-5p, miR-455-5p, miR-365b-5p, miR-193a-3p, miR-329-5p, novel_68, miR-3120-3p, miR-655-5p, miR-181b-3p, miR-320c, miR-677, miR-669, miR-2387, miR-2285ab, miR-18a-3p, miR-450b-3p, miR-6395, miR-378f, miR-136-3p, miR-1193, miR-193b-3p, novel_27, miR-326-3p, miR-20a-5p, miR-206, miR-6516-5p, miR-378h, miR-302a-5p, miR-450a-1-3p, miR-330-5p, miR-1, miR-490-3p, miR-3956-5p, miR-200a, miR-1957a, miR-29a-5p, miR-3065-3p, novel_127, miR-200a-3p, miR-874-3p, miR-141-3p, miR-17-5p, miR-320a, miR-93-5p, miR-329b, miR-485-5p, miR-1248, miR-1814c, miR-3074-1-3p, miR-20b-5p, miR-1306-5p, miR-93, miR-365a-5p, miR-378c, miR-370-5p, miR-135a-1-3p, miR-100-3p</p> <p>miR-4443, miR-154b-5p, miR-2284z, miR-148b-3p, miR-3596, miR-3960, miR-378d, miR-2284aa, miR-1260b, miR-1306, miR-148a-3p, miR-130a-5p, miR-125b-2-3p, miR-1260b, miR-29b-1-5p, miR-28b, miR-28-5p, miR-152-3p, miR-3653-3p, miR-708-5p, miR-4726-5p, miR-665, miR-29b-1-5p, miR-1306-5p, miR-28c, miR-1260a</p> <p>miR-374b-3p, miR-21c, miR-199b-5p, miR-301, miR-21a-3p, miR-381-3p, miR-300, miR-10b-3p, miR-21-5p, miR-3120-3p, miR-548e-3p, miR-455-3p, miR-199a-5p, miR-539-5p, miR-2483-3p, miR-383-5p, miR-7859, miR-655-3p, miR-2332, miR-205-5p, miR-199b-5p, miR-181a-2-3p, novel_101, miR-369-3p, miR-1306-5p, miR-199b-5p, miR-374c-5p, miR-199a-5p, miR-323c</p> |
| SPATA32 | ENSOARGOC spermatoc |                                                                                                                                                                                                                                                                                                                                                                                                                                                                                                                                                                                                                                                                                                                                                                                                                                                                                                                                                                                                                                                                                                                                                                                                                                                                                                                                                                                                                                                                                                                                                                                                                                                                                                                                                                                                                                                                                                                                                                                                                                                                                                                                                                                                                                                                                                                                                    |
| SARAF   | ENSOARGOC store-op  |                                                                                                                                                                                                                                                                                                                                                                                                                                                                                                                                                                                                                                                                                                                                                                                                                                                                                                                                                                                                                                                                                                                                                                                                                                                                                                                                                                                                                                                                                                                                                                                                                                                                                                                                                                                                                                                                                                                                                                                                                                                                                                                                                                                                                                                                                                                                                    |

miR-144-5p, miR-1185-2-3p, miR-3596, miR-499a-3p, miR-2483-3p, miR-374b-5p, miR-7689-3p, miR-211-5p, miR-2284g, miR-139-5p, miR-2319b, miR-3963, miR-221, miR-877-3p, novel\_111, miR-2447, miR-154-3p, novel\_82, miR-455-3p, miR-1185-3p, miR-496-5p, miR-181b-2-3p, miR-330-3p, miR-199b-3p, miR-1343-3p, miR-323b, miR-1a-3p, miR-8485, miR-1b-5p, miR-23a-3p, miR-101b-3p, miR-146b, miR-491-5p, miR-487b-5p, miR-323b-3p, novel\_19, miR-16b, miR-106b-5p, let-7i-5p, miR-15b-5p, miR-377-3p, miR-499b-3p, miR-582-5p, miR-154a-3p, miR-552-3p, miR-296-3p, miR-2331-3p, miR-1277-3p, miR-625-5p, miR-345-5p, miR-655, miR-411, miR-299, miR-2285c, miR-122-5p, miR-6525, miR-224-5p, let-7b, miR-129-2-3p, miR-130b-5p, miR-487b-5p, miR-30a-3p, miR-3604, let-7f, miR-2285j, miR-30e-3p, miR-1247-5p, miR-7859, miR-23b-3p, miR-23c, miR-30d-3p, miR-106a, miR-2284u, miR-493-3p, novel\_73, miR-142-3p, miR-217-5p, miR-1961, miR-486-3p, miR-143-3p, miR-181b-1-3p, miR-369-3p, miR-195a-3p, miR-345-3p, miR-487a, let-7k, miR-98-5p, miR-122-3p, miR-92a-1-5p, miR-210-5p, miR-320c, miR-144-3p, miR-677, miR-181b-3p, miR-411b-3p, miR-146b-5p, let-7e-5p, miR-1306, miR-216a-3p, miR-374c-5p, miR-379-3p, miR-206, miR-2284o, miR-4324, miR-142b, miR-28c, miR-103a-3p, miR-497-5p, miR-2284x, miR-16b, novel\_23, miR-19b-2-5p, miR-223-3p, miR-1843b-5p, miR-2285r, miR-2284l, miR-668-3p, miR-6240, miR-106b-3p, miR-378a-5p, miR-365b-5p, miR-194a, novel\_51, miR-377-3p, miR-146a, miR-331-5p, miR-3068-3p, miR-874-3p, miR-20b-5p, miR-876-3p, miR-345-5p, miR-93-5p, miR-200a-5p, miR-23b, miR-331-5p, miR-1260b, miR-16-5p, miR-144-5p, miR-181a-2-3p, miR-331-5p, miR-2284k, miR-129-1-3p, novel\_121, miR-322-5p, miR-2285ad, miR-429-3p, miR-155-5p, miR-3591-5p, miR-29a-5p, let-7g, miR-2284y, miR-192-3p, miR-450b-5p, miR-2284f, novel\_96, miR-6536, let-7f-5p, let-

miR-3600, miR-212-5p, miR-548e-3p, miR-7859, miR-23b-3p, miR-222-5p, miR-23c, miR-124-3p, miR-188-3p, miR-1197-5p, miR-378a-3p, miR-5703, miR-378i, miR-2366, miR-16-1-3p, miR-378d, miR-361-5p, miR-345-3p, miR-216c-5p, miR-2424, miR-377-5p, miR-181b-1-3p, miR-216a-5p, miR-422a, miR-92a-1-5p, miR-30b-3p, miR-221-5p, miR-182-5p, miR-296-3p, miR-545-3p, miR-221-5p, miR-378a-3p, miR-548o-3p, miR-660-5p, miR-204-3p, miR-544-3p, miR-499b-3p, miR-139-5p, miR-129b-3p, miR-433-3p, let-7f-1-3p, miR-450a-1-3p, novel\_99, miR-186-5p, miR-2312, miR-345-5p, miR-1271, miR-3074-2-3p, miR-378c, miR-6134, miR-769-5p, miR-224-5p, miR-320e, let-7b-3p, miR-2285j, miR-129-5p, miR-450b-3p, miR-664a, miR-145b, miR-222-5p, miR-181b-2-3p, novel\_78, miR-1343-3p, miR-409b, miR-216a-3p, miR-500-5p, miR-455-3p, miR-1185-3p, miR-425-3p, miR-539-5p, miR-296-5p, miR-378b, miR-484, miR-2284aa, miR-1839-5p, miR-378c, miR-1388-5p, miR-544a, miR-23a-3p, miR-33a-5p, miR-124a, miR-8485, miR-378d, miR-182-5p, miR-1306-5p, novel\_103, miR-24-1-5p, miR-139-5p, miR-20a-3p, miR-203-3p, miR-1185-2-3p, miR-378e, miR-3596, miR-499a-3p, miR-489, miR-378j, miR-129b-5p, miR-96-5p, miR-299b-5p, miR-2285f, miR-2447, miR-361-3p, miR-362-5p, miR-769-5p, miR-218-5p, miR-2285t, miR-499a-5p, miR-429-3p, miR-2284z, miR-134-5p, miR-450a-1-3p, novel\_121, miR-24-2-5p, miR-758-5p, miR-378h, miR-1271-5p, miR-3591-5p, miR-134, miR-128-3p, miR-582-3p, miR-4286, miR-2403, novel\_39, miR-1957a, miR-490-3p, miR-2285b, miR-450b-5p, miR-24-2-5p, miR-205-5p, miR-200c, miR-200c-3p, miR-127-5p, miR-154b-5p, miR-769, miR-362-5p, miR-3154, miR-671-5p, miR-1248, miR-10b-3p, miR-767, miR-345-5p, miR-1306-5p, miR-145-3p, miR-378c, miR-500b-5p, miR-331-3p, miR-135a-5p, miR-135a-1-3p, miR-134-5p, miR-767-5p, miR-377-5p, miR-31-5p, novel\_116, miR-544b, miR-2355-3p, miR-139-5p, miR-874-3p, miR-105-1, miR-2319b, miR-370-3p, novel\_79, miR-339-5p, miR-365a-3p, miR-139-5p, miR-2285ab, miR-2312, miR-339b, miR-105-2, miR-877-3p, miR-3059-5p, miR-2285f, miR-2285x, miR-877-3p, miR-6525, miR-486-3p, miR-105-5p, miR-339a, miR-664a-5p, miR-486b-3p

miR-194b-5p, miR-2285f, miR-1296-5p, miR-541-3p, miR-3059-5p, novel\_60, miR-4726-5p, miR-2285y, miR-30b-5p, miR-454-5p, miR-27a-3p, miR-3082-5p, miR-7977, miR-452-3p, miR-20a-3p, miR-664b, novel\_94, miR-361-3p, miR-3187-3p, miR-33a-5p, miR-652-5p, miR-424-5p, miR-106a-5p, miR-542-5p, miR-25-5p, miR-1306-5p, miR-326, miR-9788-3p, miR-27a-3p, miR-3120-5p, miR-2426, miR-30b-3p, miR-3962, miR-10b, miR-143-5p, miR-4791, miR-484, miR-296-5p, miR-338-3p, miR-10b-5p, miR-424-5p, miR-664a, miR-320e, miR-29b-2-5p, miR-324-3p, miR-877-5p, miR-532-5p, miR-21-3p, miR-221-5p, miR-545-3p, miR-30f, miR-133b-3p, miR-2312, let-7f-1-3p, miR-2432, miR-2411, miR-146a-5p, miR-130a-5p, miR-20a, miR-183-5p, miR-21-3p, miR-30b-3p, miR-34b-5p, miR-221-5p, miR-760-3p, miR-106a, miR-125b, miR-542-5p, miR-15a-5p, miR-1b-3p, miR-3960, miR-378d, let-7a-3p, miR-188-3p, miR-1197-5p, miR-5703, miR-2300b-3p, novel\_133, miR-2428, miR-449a, miR-326-3p, miR-24-3p, novel\_101, miR-542-5p, miR-203b-5p, miR-128-1-5p, miR-34c, miR-16a, miR-20a-5p, miR-15a, miR-670-3p, miR-34b, miR-29a-3p, miR-146b-3p, miR-10a-5p, miR-320b, miR-195a-5p, miR-1291, miR-378b, miR-2387, miR-2285ab, miR-345-5p, miR-130b-5p, miR-125a-5p, miR-1343-5p, miR-17-5p, miR-106a-5p, miR-20b, miR-185-5p, miR-432-5p, miR-26b-3p, miR-377-5p, miR-138, miR-30b-3p, miR-29b, miR-194-5p, miR-3071-5p, miR-145a-5p, miR-1285, miR-873a-5p, miR-365a-5p, miR-93, miR-133a-3p, miR-103b, miR-1306-5p, miR-486b-3p, miR-138-5p, miR-135a-1-3p, miR-29b-3p, miR-410-5p, miR-324-5p, miR-34c-5p, miR-615-5p, miR-370-3p, miR-485-5p, miR-7144-5p, miR-376c-5p, miR-23a-5p, let-7g-3p, miR-17-5p, miR-3154, miR-2448-3p, miR-381-3p, miR-490-3p, miR-1271-3p, miR-380-5p, miR-2478, miR-4286, miR-29b-2-5p, miR-3529-3p, miR-543-5p, miR-191-3p, miR-2898, miR-150a-2-3p, miR-330a, miR-214-5p, miR-2411-5p, miR-

miR-181b-1-3p, miR-376c-3p, miR-377-5p, miR-421-5p, miR-664b-3p, miR-376a-5p, miR-143-3p, miR-2424, miR-202-5p, novel\_17, miR-92a-1-5p, miR-345-3p, miR-219b-5p, miR-23c, miR-23b-3p, miR-7859, miR-106a, miR-33b-3p, miR-361-5p, miR-664-5p, miR-1434-5p, miR-769-5p, miR-665-5p, miR-487b-5p, miR-2285j, miR-15b-3p, miR-665, miR-377-3p, miR-376e-3p, miR-499b-3p, miR-548o-3p, miR-2331-3p, miR-296-3p, miR-345-5p, miR-186-5p, miR-2285c, miR-450a-1-3p, miR-23a-3p, miR-199b-5p, miR-153-3p, miR-106b-5p, miR-496-5p, miR-153, miR-1185-3p, miR-2459, miR-411b-5p, miR-455-3p, miR-148b-5p, novel\_78, miR-181b-2-3p, miR-21b, miR-101c, miR-1839-5p, miR-758-3p, miR-1a-3p, miR-877-3p, miR-7705, miR-1285-5p, miR-3968, miR-101-3p, miR-499a-3p, miR-1185-2-3p, miR-203-3p, miR-7689-3p, miR-136-5p, miR-9-3p, miR-493-5p, miR-335-3p, miR-127-5p, miR-3071-3p, miR-505-5p, novel\_121, miR-134-5p, miR-2284z, miR-450a-1-3p, miR-6517, miR-429-3p, miR-196a-5p, miR-1197-3p, miR-134-5p, miR-125b-5p, miR-376c-3p, miR-3068-3p, miR-125a, miR-345-5p, miR-2318, miR-1248, miR-20b-5p, miR-30e-5p, miR-23b, miR-93-5p, miR-493-5p, let-7f-2-3p, let-7f-2-3p, miR-196b-5p, miR-378a-5p, miR-483-3p, miR-377-3p, miR-194a, miR-2411-3p, miR-194-3p, miR-31-5p, miR-16-1-3p, miR-27b-3p, miR-188-5p, miR-19b-2-5p, miR-450c-3p, miR-199b-5p, miR-2284w, miR-1839-3p, miR-379-3p, miR-206, miR-421-5p, miR-625-3p, miR-28c, miR-412-5p, miR-4324, novel\_87, miR-181b-3p, miR-669, miR-320c, miR-677, miR-144-3p, miR-329-5p, miR-216b-3p, miR-3065-5p, miR-150-5p, miR-3970, miR-1306, miR-130a-5p, miR-2411, miR-2432, miR-216c-5p, miR-20a, miR-106a, miR-320d, miR-21-3p, miR-196a-3p, miR-125b, miR-216a-5p, miR-412-5p, miR-340-5p, miR-200b, miR-548e-3p, miR-505-3p, miR-4429, miR-215-5p, miR-376a-5p, novel\_133, miR-188-3p, miR-290A, miR-206-3p, miR-2330-3p, miR-17-3p, miR-155-

miR-193b-3p, miR-29c-3p, miR-2285x, miR-135a-2-3p, miR-449a, miR-2428, miR-371b-3p, miR-34c, novel\_87, miR-502-5p, miR-6529b, miR-203b-5p, miR-22-5p, miR-29a, novel\_68, miR-3074-5p, miR-6535, miR-323a-5p, miR-411b-3p, novel\_69, miR-29a-3p, miR-299b-3p, miR-670-3p, miR-34b, miR-1306, miR-150-5p, miR-376b-3p, miR-18a-3p, miR-6516-3p, miR-505-3p, miR-380-5p, miR-296-3p, miR-432-3p, miR-432-3p, novel\_51, miR-2411-3p, miR-7-5p, miR-296-3p, miR-660, miR-193a-3p, miR-124-5p, miR-378a-5p, miR-187-3p, miR-133b-5p, miR-3535, miR-708-3p, miR-7b-5p, miR-1434-3p, miR-29b, miR-30b-3p, miR-219a-1-3p, miR-193a-5p, miR-29b-3p, miR-410-5p, miR-486b-3p, miR-767-5p, miR-2355-5p, miR-34c-5p, miR-769, miR-3154, miR-2448-3p, miR-301, miR-7144-5p, miR-767, miR-181a-2-3p, novel\_39, miR-3065-3p, miR-2285b, miR-192-3p, miR-380-5p, miR-376b-3p, miR-6119-5p, novel\_127, novel\_96, miR-127-5p, miR-196a-2-3p, miR-299a-3p, miR-2285ad, miR-6517, miR-6516-5p, miR-29d-3p, miR-345-3p, miR-877-3p, miR-2285y, miR-769-5p, miR-2285n, novel\_82, miR-7977, miR-376d, miR-361-3p, miR-140-5p, miR-376a-3p, miR-877-3p, let-7c-3p, miR-33a-5p, miR-4532, miR-199a-3p, miR-1306-5p, novel\_115, miR-214-3p, miR-491-5p, miR-487b-5p, miR-2300a-5p, miR-9788-3p, miR-455-3p, miR-539-5p, miR-142-3p, miR-376b-3p, miR-1298-3p, miR-30b-3p, miR-296-5p, miR-4791, miR-450b-5p, miR-214, miR-665-5p, miR-3074-5p, miR-338-3p, miR-6525, miR-769-5p, miR-665, miR-874-5p, miR-6516-3p, miR-3065-3p, novel\_107, miR-532-5p, miR-221-5p, miR-660-5p, miR-548o-3p, miR-6516, miR-193b-3p, miR-216b-5p, miR-323-5p, miR-129b-3p, miR-625-5p, novel\_99, let-7g-3p, miR-2887, miR-216c-5p, miR-486-3p, miR-125b-2-3p, miR-142a-3p, miR-345-3p, miR-618, miR-34b-5p, miR-221-5p, miR-299-3p, miR-21-3p, miR-3600, miR-212-5p, miR-505-3p, miR-548a-3p, miR-18a-3p, miR-100a-3p, miR-novel\_78, novel\_4, miR-216a-3p, miR-544b, miR-432-5p, miR-134-3p, miR-197-3p, miR-432, miR-2284r, miR-6529a, miR-181a-5p, miR-541, miR-29b, miR-544a, miR-23a-3p, miR-493-5p, miR-382-3p, miR-2330-5p, miR-296-3p, miR-432-3p, miR-505, novel\_51, miR-320b, miR-296-3p, miR-320b, miR-126b-5p, miR-26b-5p, miR-216b-3p, miR-10b, miR-320c, miR-25, miR-378g, miR-2404, miR-29a-3p, miR-150-5p, miR-493-5p, miR-136-5p, miR-17-3p, miR-29c-3p, miR-181d-5p, miR-541-3p, miR-423-5p, miR-154a, miR-877-3p, miR-2285y, miR-502b, miR-4726-5p, miR-29a, miR-2285ad, miR-214-5p, miR-383-5p, miR-23b-3p, miR-23c, miR-29d-3p, miR-1197-5p, miR-3578, miR-2300b-3p, miR-496, miR-378d, miR-4429, miR-33b-3p, miR-216c-5p, miR-200a, miR-1271-3p, miR-92a-1-5p, miR-26a-5p, miR-200a-3p, miR-320d, miR-17-3p, miR-181b-5p, miR-141-3p, miR-296-3p, miR-503-3p, miR-496-3p, miR-544-3p, miR-320a, miR-23b, miR-3154, miR-488-3p, miR-3074-1-3p, miR-543-3p, let-7g-3p, miR-767, miR-103b, miR-425-5p, miR-3184-5p, miR-181c-5p, miR-6525, miR-665, miR-29b-3p, miR-4492, miR-17-3p, miR-767-5p

LLGL2

ENSOARGO(l

g

DRG1

ENSOARGO(developm

miR-130b-5p, let-7f-2-3p, miR-668-3p, miR-34b-5p, miR-377-3p, miR-146a, novel\_51, miR-194a, miR-378a-5p, miR-193a-3p, miR-122-3p, miR-339-5p, miR-665, miR-185-5p, miR-3431, miR-544b, novel\_116, miR-542-3p, miR-1434-3p, miR-873a-5p, miR-194-5p, miR-197-3p, miR-1260b, miR-29b, miR-7862, miR-27b-3p, miR-342-3p, miR-2285x, miR-29c-3p, miR-17-3p, miR-495-3p, miR-193b-3p, miR-323c, miR-24-3p, miR-371b-3p, miR-2284w, miR-326-3p, miR-142b, miR-28c, miR-502-5p, novel\_1, miR-29a, miR-6119-3p, miR-199c, miR-625-3p, miR-3074-5p, miR-329-5p, novel\_68, miR-26b-5p, miR-655-5p, miR-29a-3p, miR-670-3p, miR-2404, miR-6535, miR-320c, miR-148a-3p, miR-3065-5p, miR-1306, miR-450b-3p, miR-135b-5p, miR-2319a, miR-146b-5p, miR-3064-5p, miR-28b, miR-148b-5p, miR-450c-5p, miR-2284a, novel\_39, miR-3065-3p, miR-2284y, miR-200c, miR-664-3p, miR-1260a, miR-339a, miR-200c-3p, miR-2898, miR-17-3p, miR-200a-3p, novel\_96, miR-152-3p, miR-423-3p, miR-429-3p, miR-6517, miR-2285ad, miR-431, miR-412, novel\_79, miR-7641, miR-6516-5p, miR-758-5p, novel\_121, miR-129-1-3p, miR-3578, miR-1290, miR-345-3p, miR-330-5p, miR-29d-3p, miR-200b-3p, miR-193a-5p, miR-6128, miR-1260b, miR-145-3p, miR-181c-3p, miR-5100, miR-29b-3p, miR-135a-5p, novel\_9, miR-28-5p, miR-141-3p, miR-2355-5p, miR-154b-5p, miR-301, miR-3154, miR-362-5p, miR-320a, miR-329b, miR-345-5p, miR-2318, miR-671-5p, miR-3074-1-3p, miR-101b-3p, miR-494-3p, miR-2284b, miR-33a-5p, miR-1b-5p, miR-758-3p, miR-8485, miR-431-5p, novel\_115, miR-1306-5p, miR-326, miR-342, miR-320b, miR-2957, miR-29b-1-5p, miR-1185-5p, miR-3085-3p, miR-491-5p, miR-146b, miR-199b-3p, miR-1343-3p, novel\_78, miR-2300a-5p, miR-27a-3p, miR-222-5p, miR-1185-3p, miR-500-5p, miR-455-3p, miR-148b-5p, miR-301b-5p, miR-296-5p, miR-125b-2-3p, miR-758-3p, miR-412-3p, miR-544a, miR-1388-5p, miR-3056-3p, miR-877-3p, miR-24-3p, miR-449a, miR-6128, miR-665-5p, miR-664a, miR-874-5p, miR-34c, miR-1973, miR-34c-5p, miR-2404, miR-34b, novel\_32, novel\_68, miR-2331-3p, miR-329-5p, miR-615-5p, miR-10b-3p, miR-1291, miR-2319a, novel\_94, miR-1248, miR-485-5p, miR-433-3p, miR-2478, miR-376a-5p, miR-4532, miR-329a-5p, miR-495-5p, miR-491-5p, miR-760-3p, miR-1343-5p, miR-34b-5p, novel\_96, miR-3071-3p, miR-92a-1-5p, miR-505-5p, miR-194-3p, miR-149-5p, miR-1247-5p, miR-34a-5p, miR-2889, miR-2300b-3p, miR-143-5p, miR-1343-5p, miR-320b, miR-2285p, miR-409-3p, novel\_74, miR-320d, miR-592, miR-2447, miR-101-5p, miR-190b-5p, miR-130a-5p, miR-4791, miR-320a, miR-33b-3p, miR-4429, miR-335-3p, miR-3955-5p, miR-5010-3p, miR-3535, miR-499b-3p, miR-499a-3p, miR-1298-3p, miR-320c, miR-204-3p, miR-194-3p





miR-1343-5p, miR-378a-5p, miR-2411-3p, novel\_51, miR-330-3p, miR-224-5p, miR-345-5p, miR-432-3p, miR-432-3p, let-7f-2-3p, let-7f-2-3p, miR-668-3p, miR-6240, miR-130b-5p, miR-16-1-3p, miR-219a-1-3p, miR-431-3p, miR-181a-5p, miR-223-3p, miR-873a-5p, miR-3431, miR-339-5p, miR-31-5p, miR-187-3p, miR-147-5p, miR-656-5p, miR-206, miR-379-3p, miR-28c, miR-2428, miR-24-3p, novel\_101, miR-17-3p, miR-495-3p, miR-1839-3p, miR-150-5p, miR-1306, miR-181b-3p, miR-677, miR-6535, miR-10a-5p, miR-3074-5p, miR-378b, miR-329-5p, miR-216b-3p, miR-200a-3p, miR-200c-3p, miR-127-5p, miR-181b-5p, miR-17-3p, miR-450a-2-3p, miR-339a, miR-30c-2-3p, miR-3071-3p, miR-200c, miR-219-3p, miR-192-3p, miR-1271-3p, novel\_39, miR-29a-5p, miR-28b, miR-450b-5p, miR-1, miR-10a-5p, miR-200b-3p, miR-30c, miR-411-3p, miR-30a-5p, miR-1343-5p, miR-134, miR-345-3p, miR-134-5p, miR-6516-5p, miR-2411-5p, novel\_79, miR-429-3p, miR-5p, miR-134-5p, miR-191-5p, miR-486b-3p, miR-2332, miR-410-5p, miR-181c-3p, miR-1306-5p, miR-671-5p, miR-7144-5p, miR-2318, miR-345-5p, miR-10b-3p, miR-3154, miR-137-3p, miR-503-3p, miR-30e-5p, miR-769, miR-215-5p, miR-1271, miR-141-3p, miR-370-3p, miR-2285aa, miR-323b-3p, miR-1306-5p, miR-30c-1-3p, miR-33a-5p, miR-1839-3p, miR-1388-3p, miR-3120-5p, miR-2426, miR-450b-5p, miR-544a, miR-101a-5p, miR-1388-5p, miR-323b, miR-1a-3p, miR-10b, miR-143-5p, miR-6529a, miR-1185-3p, miR-148b-5p, miR-455-3p, miR-181b-2-3p, miR-5010-3p, novel\_78, novel\_4, miR-330-3p, miR-769-5p, miR-2440, miR-30b-5p, miR-219a-2-3p, miR-181d-5p, miR-3059-5p, miR-504, miR-147-3p, miR-181a-3p, miR-1185-2-3p, miR-2483-3p, miR-3082-5p, miR-20a-3p, miR-4792, miR-21-3p, miR-30d, miR-466i-5p, miR-345-3p, miR-30b, miR-486-3p, miR-2411, miR-2424, miR-125b-2-3p, miR-181b-1-3p, miR-376a-5p, miR-345-3p, miR-329a-5p, miR-378d, miR-16-1-3p, novel\_72, miR-140-3p, miR-1197-5p, miR-188-3p, miR-455-3p, miR-769, miR-7857-3p, miR-2355-5p, miR-874-3p, miR-140-5p, miR-18a-3p, let-7a-2-3p, let-7g-3p, miR-299a-3p, miR-299b-5p, miR-129b-5p, miR-188-3p, miR-18a-3p, miR-197-3p, miR-299, let-7a-2-3p, miR-769-5p, miR-181a-2-3p, novel\_127, miR-769-5p, novel\_17, miR-199b-5p, miR-3154, miR-132-5p, miR-6130, miR-199a-5p, miR-6535, miR-542-5p, miR-296-3p, miR-17-3p, miR-4492, miR-361-3p, miR-3184-5p, miR-423-5p, miR-199b-5p, miR-4510, miR-17-3p, miR-542-5p, miR-653, miR-296-5p, miR-1343-5p, miR-5703, miR-133b-5p, miR-377-5p, miR-17-3p, miR-2898, miR-199b-5p, miR-1343-5p, miR-542-5p, miR-542-5p, miR-92a-1-5p, miR-185-3p, miR-377-5p, miR-199a-5p, miR-363-5p, miR-2284l, miR-3074-2-3p, miR-320d, miR-147-5p, miR-320b, miR-2285af, miR-92a-1-5p, miR-6516-5p, miR-6516, miR-320c, miR-296-3p, miR-2285aa, miR-450b-5p, miR-4429, miR-300, miR-493-3p, miR-625-5p, miR-381-3p, miR-320a, miR-381-3p

PARP11 ENSOARGO(poly (ADP-ribose) polymerase 11) (ADP-ribose polymerase 11)

CRCP ENSOARGO(CGRP receptor) (Calcitonin receptor-like receptor 1)

PHYHIP ENSOARGO(phytanoyl-CoA synthase) (Phytanoyl-CoA synthase)

MYL12B ENSOARGO(myosin, heavy chain 12B) (Myosin heavy chain 12B)

miR-29b-1-5p, miR-50b, miR-326, miR-1306-5p, miR-103a-2-5p, let-7e, let-7a-5p, miR-8485, miR-3187-3p, miR-2310, miR-30b-3p, miR-1839-5p, miR-3120-5p, miR-1388-5p, miR-450b-5p, miR-27a-3p, miR-145b, novel\_78, miR-330-3p, miR-151a-3p, miR-216a-3p, miR-500-5p, miR-2285e, miR-539-5p, miR-142-3p, miR-107-5p, miR-218-5p, miR-450a-5p, miR-2285f, miR-3059-5p, miR-219a-2-3p, miR-154a, miR-361-3p, miR-362-5p, miR-378j, miR-409-5p, miR-335-3p, miR-877-3p, miR-2285u, miR-499b-5p, miR-211-5p, miR-664b, miR-2319b, let-7d-5p, miR-27a-3p, miR-7857-3p, miR-196a-3p, miR-26a-5p, miR-1277-5p, let-7k, miR-202-5p, miR-98-5p, miR-2285w, miR-380-3p, miR-29b-1-5p, miR-142a-3p, miR-130a-5p, miR-5703, miR-188-3p, miR-1246, miR-1961, miR-16-1-3p, miR-378d, miR-142-3p, miR-33b-3p, miR-3600, miR-485-3p, miR-548e-3p, miR-2284h-5p, miR-383-5p, miR-487a-3p, miR-219b-3p, miR-151-3p, miR-30a-3p, miR-338-5p, miR-29b-2-5p, let-7f, miR-208b-5p, miR-708-5p, miR-129-5p, novel\_74, miR-6516-3p, miR-425-5p, miR-3074-2-3p, let-7b, let-7b-5p, miR-346, miR-2285c, novel\_99, miR-2312, miR-345-5p, miR-3065-3p, miR-532-5p, miR-296-3p, miR-548o-3p, miR-22-3p, let-7i-5p, miR-6516, miR-193b-3p, miR-330-3p, miR-452-5p, miR-193a-3p, miR-378a-5p, miR-483-3p, miR-196b-5p, miR-2483-5p, let-7f-2-3p, let-7f-2-3p, miR-6240, miR-345-5p, let-7a-2-3p, miR-2285r, miR-654-3p, miR-432-3p, miR-22-3p, miR-145a-5p, miR-708-3p, miR-27b-3p, miR-30b-3p, miR-380-3p, miR-16-1-3p, miR-31-5p, miR-187-3p, miR-6238, miR-194-3p, miR-411-5p, miR-2355-3p, miR-2285g, miR-185-5p, let-7g-5p, miR-3431, let-7i, miR-502-5p, miR-22-5p, miR-625-3p, miR-193b-3p, miR-135a-2-3p, miR-326-3p, miR-2284w, miR-211, miR-1306, miR-150-5p, miR-376b-5p, miR-2285ab, miR-135b-5p, let-7e-5p, miR-26b-5p, miR-3120-3p, miR-216b-3p, miR-144-3p, miR-669, miR-374c-3p, miR-3071-3p, let-7c-5p, miR-664-3p, miR-219-

miR-194-3p, let-7g-5p, miR-2285g, miR-377-5p, miR-187-3p, miR-340-3p, miR-188-5p, miR-497-5p, miR-16-1-3p, miR-16b, miR-374b-3p, miR-145a-5p, miR-7b-5p, miR-1434-3p, miR-345-5p, miR-539-3p, miR-493-5p, miR-196b-5p, miR-146a, miR-7-5p, miR-320c, miR-374c-3p, miR-146b-3p, miR-2404, miR-7-1-3p, miR-26b-5p, miR-329-5p, miR-3074-5p, miR-195a-5p, let-7e-5p, miR-146b-5p, miR-2285k, miR-18a-3p, miR-3065-5p, miR-2285ab, miR-199b-5p, miR-24-3p, miR-211, miR-495-3p, miR-17-3p, miR-3957-3p, miR-1839-3p, novel\_1, miR-6119-3p, novel\_87, let-7i, miR-2284o, miR-16a, miR-15a, miR-486-5p, miR-758-5p, miR-505-5p, miR-322-5p, miR-431, miR-1224-5p, miR-196a-2-3p, miR-2285ad, miR-496, miR-582-3p, let-7d, miR-196a-5p, miR-615-3p, miR-2285b, miR-1271-3p, miR-1957a, let-7g, miR-199a-5p, miR-148b-5p, miR-4286, miR-2284f, miR-2385-3p, novel\_127, let-7f-5p, miR-17-3p, let-7c-5p, miR-30f, miR-125a-3p, miR-2285af, miR-199a-5p, miR-365a-3p, miR-374c-3p, miR-300-3p, miR-215-5p, miR-874-3p, miR-503-3p, miR-487a-3p, miR-1248, miR-1814c, miR-7144-5p, miR-345-5p, miR-876-3p, miR-2474, miR-320a, miR-503-3p, miR-16-5p, miR-204-5p, miR-592, miR-28-5p, novel\_9, miR-26c, miR-100-3p, miR-2285e, miR-148b-5p, miR-455-3p, miR-147a, miR-145b, miR-409b, miR-2426, miR-541, miR-484, miR-2310, miR-652-5p, miR-33a-5p, miR-424-5p, miR-1839-3p, miR-494-3p, let-7a-5p, miR-214-3p, let-7e, miR-146b, miR-199b-5p, miR-487b-5p, novel\_124, miR-16b, miR-2957, miR-431-5p, miR-320b, let-7d-5p, miR-3082-5p, miR-211-5p, miR-7689-3p, miR-2285u, miR-544-5p, miR-493-5p, miR-668-5p, miR-136-5p, miR-129b-5p, miR-199b-5p, miR-154a, miR-1285-5p, novel\_111, miR-2285f, miR-541-3p, miR-885-5p, miR-154-3p, miR-499a-5p, miR-3968, miR-615, miR-218-5p, miR-2285n, miR-15a-5p, miR-222-5p, miR-487a-3p, miR-485-3p, miR-18a-3p, miR-133a-3p, miR-16-1-3p, miR-218-1-3p, miR-

GHITM

ENSOARGO(growth h

miR-2411, miR-486-3p, miR-377-5p, miR-29b-1-5p, miR-216c-5p, miR-329a-5p, miR-299-3p, miR-760-3p, miR-92a-1-5p, miR-500a-5p, miR-2285p, miR-210-5p, miR-196a-3p, miR-1247-5p, novel\_83, miR-340-5p, miR-148b-3p, miR-1b-3p, miR-378d, miR-2284u, miR-218-1-3p, miR-16-1-3p, miR-5703, miR-217-5p, miR-188-3p, miR-124-3p, miR-362-3p, miR-224-5p, miR-6525, miR-145a-3p, miR-3074-5p, miR-669a-3p, miR-454-3p, miR-1468-5p, miR-6516-3p, miR-450b-3p, miR-338-5p, miR-665, miR-204-3p, miR-139-5p, miR-301a-3p, miR-582-5p, miR-2284s, miR-182-5p, miR-548o-3p, miR-504-5p, miR-582-5p, novel\_99, miR-186-5p, miR-450a-1-3p, miR-21a-3p, miR-299, miR-1b-5p, miR-758-3p, miR-8485, miR-124a, miR-1468, miR-103a-2-5p, miR-487b-5p, miR-130b-3p, miR-3955-3p, miR-182-5p, miR-29b-1-5p, miR-362-3p, novel\_103, miR-1185-3p, miR-2459, miR-455-3p, miR-1298-3p, miR-539-5p, miR-105-1, novel\_78, miR-409b, miR-101c, miR-362-3p, miR-758-3p, miR-2284r, miR-329-3p, miR-484, miR-7705, miR-9-5p, miR-212-3p, miR-2447, miR-2284q, miR-2285t, miR-499a-5p, miR-107-5p, miR-382-3p, miR-1185-2-3p, miR-3082-5p, miR-2483-3p, miR-2319b, miR-10b, miR-139-5p, miR-2284g, miR-493-5p, miR-504, miR-361-3p, miR-140-5p, miR-2284a, miR-2285b, miR-2284y, miR-28b, miR-495-5p, miR-3529-3p, miR-152-3p, miR-200a-3p, miR-217, miR-214-5p, miR-450a-1-3p, miR-2411-5p, miR-9-5p, miR-299a-3p, miR-2285ad, miR-105-2, miR-128-3p, miR-7134-5p, miR-1290, miR-486b-3p, miR-331-3p, miR-2332, miR-133c, miR-374c-3p, miR-141-3p, miR-2355-5p, miR-370-3p, miR-671-5p, miR-329a, miR-3154, miR-488-3p, miR-503-3p, miR-432-3p, miR-2285r, miR-493-5p, miR-105-5p, miR-224-5p, miR-3431, miR-377-5p, miR-130a-3p, miR-31-5p, miR-188-5p, miR-2284x, miR-219a-1-3p, miR-16-1-3p, miR-450c-3p, miR-1434-3p, miR-542-3p, miR-301b-3p, miR-24-3p, miR-2285v, novel\_101, miR-135a-2-3p, miR-656-5p, miR-22-novel\_68, miR-489, miR-3959-5p, miR-2483-3p, miR-199a-5p, miR-154b-5p, miR-21a-3p, miR-199b-5p, miR-137-3p, miR-23b, miR-412-3p, miR-146b-5p, miR-544-5p, miR-1827, miR-1983, miR-539-5p, miR-3059-5p, miR-193a-5p, miR-214, miR-194b-5p, miR-9-5p, miR-877-3p, novel\_27, miR-326-3p, miR-145-3p, miR-199b-5p, miR-2440, miR-133a-5p, miR-331-3p, miR-147-5p, miR-6517, miR-3600, miR-23b-3p, miR-9-5p, miR-503-5p, miR-23c, miR-330-5p, miR-3071-5p, miR-1193, miR-194-5p, miR-218-1-3p, miR-2284x, miR-503-5p, miR-23a-3p, miR-628-5p, miR-146a-5p, miR-199a-5p, miR-1271-3p, miR-503-5p, miR-618, miR-125a-3p, miR-326, miR-146a, miR-6119-5p, miR-185-3p, miR-194a, miR-450a-2-3p, miR-760-3p, miR-199b-5p, miR-146b, miR-452-5p, miR-214-3p, miR-21-3p

miR-505-5p, miR-9-5p, miR-129-1-3p, miR-486-5p, miR-450a-1-3p, miR-299a-3p, miR-2285ad, novel\_79, miR-412, miR-1224-5p, miR-155-5p, miR-23b-5p, miR-330-5p, miR-200a, novel\_39, miR-3064-5p, miR-152-3p, miR-200a-3p, miR-125a-3p, miR-205-5p, miR-331-5p, miR-874-3p, miR-3956, miR-125a, miR-2355-5p, miR-329a, miR-2474, miR-1248, miR-20b-5p, miR-93-5p, miR-1197-3p, miR-1260b, novel\_42, novel\_63, miR-2433, miR-125b-5p, miR-6740-5p, miR-3431, miR-134-3p, miR-412-5p, miR-194-3p, miR-340-3p, miR-339-5p, miR-188-5p, miR-27b-3p, miR-7b-5p, miR-1843b-5p, miR-2113, miR-223-3p, miR-432, miR-450c-3p, miR-432-3p, miR-6240, miR-483-3p, miR-378a-5p, miR-377-3p, miR-7-5p, miR-2411-3p, novel\_51, miR-299b-3p, novel\_69, miR-181b-3p, miR-677, miR-3074-5p, miR-3120-3p, miR-412-3p, miR-378f, miR-148a-3p, miR-1306, miR-199b-5p, miR-335-5p, miR-6119-3p, miR-6123, miR-576-3p, miR-4324, miR-7859, miR-328-3p, miR-106a, miR-493-3p, miR-34a-5p, miR-218-1-3p, miR-2366, miR-378i, miR-217-5p, miR-378a-3p, miR-181b-1-3p, miR-377-5p, miR-486-3p, miR-503-5p, miR-487a, miR-345-3p, miR-202-5p, miR-618, miR-210-5p, miR-422a, miR-122-3p, miR-345-3p, miR-92a-1-5p, miR-324-3p, miR-216b-5p, miR-377-3p, miR-10a, miR-2284s, miR-1277-3p, miR-30c-1-3p, miR-504-5p, miR-2331-3p, miR-552-3p, miR-154a-3p, miR-339b, miR-1827, miR-450a-1-3p, miR-2285c, miR-299, miR-433-3p, miR-598-3p, miR-769-5p, miR-3184-5p, miR-129-2-3p, miR-3074-5p, miR-214, miR-4492, miR-874-5p, miR-665, miR-147a, miR-2459, miR-421, miR-455-3p, miR-1343-3p, novel\_78, miR-330-3p, miR-181b-2-3p, miR-362-3p, miR-541, miR-301b-5p, miR-2284r, miR-329-3p, miR-378d, miR-8485, miR-214-3p, miR-199b-5p, miR-106b-5p, miR-505, miR-29b-1-5p, miR-378g, miR-3596, miR-4443, miR-2319b, miR-4792, miR-211-5p, miR-504, miR-1982, miR-140-5p, novel\_111, miR-877-3p, miR-361-3p, miR-192, miR-216a-3p, miR-105-1, miR-151a-3p, miR-7641, miR-27a-3p, miR-105-2, miR-128-3p, miR-188-5p, miR-378d, miR-27b-3p, miR-3120-5p, miR-8485, miR-200a, miR-345-5p, miR-466f-3p, miR-2285p, miR-105-5p, miR-182-5p, miR-27a-3p, miR-4792, miR-370-5p, miR-182-5p, miR-345-5p, miR-345-5p, miR-136-5p, miR-668-5p, miR-216a-3p, miR-323c, miR-1193, miR-370-5p, miR-151-3p, miR-382-5p

miR-4443, miR-323a-5p, miR-378g, miR-2285u, miR-7689-3p, miR-3064-5p, miR-6395, miR-1306, miR-361-3p, miR-3141, miR-326-3p, miR-423-5p, miR-2428, miR-24-3p, miR-193b-3p, miR-1193, miR-342-3p, miR-541-3p, miR-7134-3p, miR-147-5p, miR-4726-5p, miR-769-5p, miR-107-5p, miR-502-5p, novel\_116, miR-149-5p, miR-2459, miR-134-3p, miR-340-3p, miR-187-3p, novel\_4, miR-1343-3p, miR-744-5p, miR-7862, miR-2889, miR-3432b, miR-22-3p, miR-873a-5p, miR-484, miR-541, miR-4532, miR-432-3p, miR-2483-5p, miR-574-3p, miR-124a, miR-130b-5p, miR-125a-5p, miR-103a-2-5p, miR-193a-3p, miR-3085-3p, miR-483-3p, miR-505, miR-197-5p, miR-3141, novel\_51, miR-342, miR-326, miR-1306-5p, miR-22-3p, novel\_32, miR-323-5p, miR-193b-3p, miR-769, miR-6130, miR-3065-3p, miR-216b-3p, miR-2355-5p, miR-370-5p, miR-532-5p, miR-1271, miR-141-3p, miR-3956, miR-125a, miR-140-5p, miR-3068-3p, miR-503-3p, miR-23a-5p, miR-885-3p, miR-7144-5p, miR-1827, miR-1248, miR-2474, miR-137-3p, miR-503-3p, miR-3184-5p, miR-769-5p, miR-3074-2-3p, miR-2330-3p, miR-1306-5p, miR-129-2-3p, miR-4510, miR-874-5p, miR-486b-3p, miR-130b-5p, miR-331-3p, miR-125b-5p, miR-6740-5p, miR-3604, miR-2285j, miR-2433, miR-370-5p, miR-328-3p, miR-129-1-3p, miR-6516-5p, miR-483-3p, miR-340-5p, miR-3600, miR-1224-5p, miR-3960, miR-378d, miR-885-3p, miR-493-3p, novel\_73, miR-124-3p, miR-2904, miR-330-5p, miR-23b-5p, miR-3065-3p, miR-486-3p, miR-3064-5p, miR-200a-3p, miR-191-3p, miR-324-3p, miR-125b

miR-2284q, miR-7134-3p, miR-4726-5p, miR-2285y, miR-769-5p, miR-1973, miR-2285n, miR-502-3p, miR-362-5p, miR-452-5p, miR-2285f, miR-541-3p, miR-212-3p, novel\_60, novel\_94, miR-877-3p, miR-129b-5p, miR-361-3p, miR-378e, miR-7857-3p, miR-7977, miR-452-3p, miR-3064-5p, miR-3085-3p, miR-362-3p, miR-5126, miR-320b, miR-758-3p, miR-4532, miR-3187-3p, miR-652-5p, miR-494-3p, miR-424-5p, miR-3120-5p, miR-2284aa, miR-2426, miR-378c, miR-30b-3p, miR-412-3p, miR-378b, miR-484, miR-296-5p, miR-2285e, miR-500-5p, miR-221-3p, miR-216a-3p, miR-142-3p, miR-2300a-5p, miR-424-5p, miR-664a, miR-320e, miR-324-3p, miR-222-3p, miR-3074-2-3p, miR-145a-3p, miR-4510, miR-378c, novel\_99, miR-2312, miR-22-3p, novel\_32, miR-204-3p, miR-6130, miR-323-5p, miR-193b-3p, miR-21-3p, miR-378a-3p, miR-21-3p, miR-30b-3p, miR-760-3p, miR-320d, miR-125b, miR-216a-5p, miR-146a-5p, miR-2432, miR-29b-1-5p, miR-216c-5p, miR-941, miR-4429, miR-188-3p, miR-1197-5p, miR-1193, miR-2408, miR-362-3p, novel\_133, miR-532-3p, miR-15a-5p, miR-200b, miR-383-5p, miR-3600, miR-3960, miR-548e-3p, miR-502b, miR-147-5p, miR-33a-3p, miR-16a, miR-133a-5p, miR-502-5p, miR-15a, miR-2428, novel\_27, miR-24-3p, novel\_101, miR-3957-3p, miR-6395, miR-195a-5p, miR-107, miR-1291, miR-21c, miR-18a-3p, miR-378b, miR-2387, miR-2285ab, miR-323a-5p, miR-2404, miR-378b, miR-125a-5p, miR-330-3p, miR-382, miR-7862, miR-1260b, miR-138, miR-30b-3p, miR-21-5p, miR-3071-5p, miR-145a-5p, miR-103, miR-185-5p, miR-2285g, miR-377-5p, miR-486b-3p, miR-138-5p, miR-331-3p, miR-1306-3p, miR-378c, miR-500b-5p, miR-6128, miR-23a-5p, miR-7144-5p, novel\_48, miR-10b-3p, miR-320a, miR-362-5p, miR-154b-5p, miR-3965, miR-365a-3p, miR-769, miR-374c-3p, miR-141-3p, miR-107, miR-200c-3p, miR-450a-2-3p, miR-2898, miR-6119-5p, miR-200c, miR-1260a, miR-190-3p, miR-28b, miR-2478, miR-

miR-144, miR-331-3p, miR-29b-3p, miR-486b-3p, miR-204-5p, miR-410-3p, miR-767-5p, miR-3607-3p, miR-93, miR-17-5p, miR-3154, miR-503-3p, miR-3074-1-3p, miR-7144-5p, miR-10b-3p, miR-370-3p, miR-365a-3p, miR-34c-5p, miR-339a, miR-200c, miR-543-5p, miR-200c-3p, miR-450a-2-3p, miR-17-3p, miR-4286, miR-181a-2-3p, miR-1271-3p, miR-2284a, miR-30a-5p, miR-29d-3p, miR-134, miR-10a-5p, miR-200b-3p, miR-582-3p, miR-7641, miR-222, miR-214-5p, miR-1271-5p, miR-33a-3p, miR-34c, miR-16a, miR-20a-5p, miR-15a, miR-199c, miR-147-5p, miR-656-5p, miR-128-1-5p, miR-17-3p, novel\_101, miR-219b-3p, miR-342-3p, miR-449a, miR-211, miR-18a-3p, miR-378b, miR-2285ab, miR-195a-5p, miR-505-3p, miR-19a-3p, miR-1291, miR-10a-5p, miR-670-3p, miR-29a-3p, miR-34b, miR-17-5p, miR-106a-5p, miR-330-3p, miR-1343-5p, miR-125a-5p, miR-2483-5p, miR-130b-5p, miR-345-5p, miR-1285, miR-653, miR-6239, miR-29b, miR-26b-3p, miR-665, miR-122-3p, miR-20b, miR-2285g, miR-338-5p, miR-320e, miR-132-5p, miR-424-5p, miR-17-3p, miR-6516-3p, miR-155-5p, miR-425-5p, miR-3074-2-3p, miR-1271, miR-145a-3p, miR-4510, miR-338-3p, miR-10b-5p, miR-27b-5p, let-7f-1-3p, miR-30f, miR-2312, let-7g-3p, miR-532-5p, miR-21-3p, novel\_25, miR-6130, miR-193b-3p, miR-125b, miR-185-3p, miR-216a-5p, miR-299-3p, miR-21-3p, miR-30d, miR-34b-5p, miR-1277-5p, miR-466i-5p, miR-106a, miR-20a, miR-2432, miR-1197-5p, miR-2904, miR-376a-5p, miR-378d, let-7a-3p, miR-19b-3p, miR-505-3p, miR-3600, miR-548e-3p, miR-199a-3p, miR-200b, miR-15a-5p, miR-107-5p, miR-2285y, miR-30b-5p, miR-2284q, miR-335, miR-3958-3p, miR-452-5p, miR-2285f, miR-212-3p, miR-154a, miR-219a-2-3p, miR-129b-5p, miR-361-3p, miR-7977, miR-499b-5p, miR-10b, miR-664b, miR-7857-3p, miR-1306-5p, miR-342, miR-494-3p, miR-424-5p, miR-106a-5p, miR-758-3p, miR-412-3p, miR-10b, miR-484, miR-296-5p, miR-3120-5p, novel\_4, miR-2285a, miR-



miR-2284y, miR-29a-5p, miR-2284a, miR-2285b, miR-1, miR-30a-3p, miR-29b-2-5p, miR-205-5p, miR-2285af, miR-6119-5p, miR-30c-2-3p, miR-322-5p, miR-1271-5p, miR-545-5p, miR-134-5p, miR-582-3p, novel\_121, miR-222, miR-2285ad, miR-299a-3p, miR-423-3p, miR-18b-5p, miR-345-3p, miR-134, miR-3578, miR-2284v, miR-6128, miR-16-5p, miR-767-5p, miR-592, miR-134-5p, miR-34c-3p, miR-2284k, miR-1-5p, miR-99b-3p, miR-331-5p, miR-223-5p, miR-2284n, miR-99a-3p, miR-215-5p, miR-767, miR-18a, miR-6240, miR-2411-3p, miR-2285g, miR-2284d, miR-133b-5p, miR-377-5p, miR-26b-3p, miR-2284ab, miR-380-3p, miR-16b, miR-16-1-3p, miR-497-5p, miR-7862, miR-1434-3p, miR-3071-5p, novel\_27, miR-1a-1-5p, miR-495-3p, miR-6119-3p, miR-206, miR-502b, miR-502-5p, miR-15a, miR-16a, miR-33a-3p, miR-299b-3p, miR-7-1-3p, miR-410-5p, miR-9851-3p, miR-195a-5p, miR-18b, miR-3970, miR-377-5p, miR-183-5p, miR-2285w, miR-345-3p, miR-2284m, miR-99a-3p, miR-3653-3p, miR-21-3p, miR-299-3p, miR-2285p, miR-345-3p, miR-23b-3p, miR-15a-5p, miR-2284h-5p, miR-30d-3p, miR-16-1-3p, miR-2284u, miR-215-5p, miR-124-3p, miR-188-3p, miR-142a-5p, miR-206-3p, miR-590-3p, miR-3958-5p, miR-1271, miR-3074-2-3p, miR-664a, miR-424-5p, miR-2285j, miR-222-3p, miR-30e-3p, miR-30a-3p, miR-29b-2-5p, miR-582-5p, miR-192-5p, miR-15b-5p, miR-30c-1-3p, miR-18a-5p, miR-2285c, miR-30c-1-3p, miR-124a, miR-424-5p, miR-23a-3p, miR-2284b, novel\_103, miR-16b, miR-147a, miR-142-5p, miR-9788-3p, miR-221-3p, miR-2285e, miR-421, miR-299a-5p, miR-101c, miR-1a-3p, novel\_111, miR-2284j, miR-2284q, miR-2285y, miR-2483-3p, miR-203-3p, miR-2284g, miR-2319b, miR-96-5p, miR-335-3p, novel\_94, miR-221, miR-378j

let-7g-3p, let-7g-3p, miR-1827, miR-548o-3p, miR-32-5p, miR-378a-3p, miR-1271, miR-215-5p, miR-2355-5p, miR-370-3p, miR-25-3p, miR-6130, miR-192-5p, miR-544-3p, miR-374c-3p, miR-154b-5p, miR-5100, miR-135a-5p, miR-320e, miR-324-3p, miR-874-5p, miR-4510, miR-129-2-3p, miR-378c, miR-1271, miR-1260b, miR-224-5p, miR-6134, miR-378c, miR-215-5p, miR-378i, miR-378a-3p, miR-218-2-3p, miR-142-3p, let-7a-2-3p, miR-548e-3p, miR-1224-5p, miR-3600, miR-1271-5p, miR-222-5p, miR-378h, miR-7859, miR-486-5p, miR-129-1-3p, miR-2284z, miR-532-3p, miR-8117, miR-1260a, miR-422a, miR-2898, miR-92a-3p, miR-105-3p, miR-503-5p, miR-181b-1-3p, miR-450b-5p, miR-92b-3p, miR-96-5p, miR-135b-5p, miR-378f, miR-3120-3p, miR-374c-3p, miR-378e, miR-181b-3p, miR-4443, miR-677, novel\_82, miR-4324, miR-92a-3p, miR-6123, miR-490-5p, miR-3956-3p, miR-363-3p, novel\_60, miR-361-3p, miR-542-3p, miR-296-5p, miR-378b, miR-450b-5p, miR-544a, miR-1260b, miR-2426, miR-378c, miR-2284aa, novel\_78, miR-3955-5p, miR-181b-2-3p, miR-503-5p, miR-544b, miR-2459, novel\_116, miR-216a-3p, miR-503-5p, miR-224-5p, miR-32, miR-378a-5p, miR-452-5p, miR-153-3p, miR-432-3p, miR-378d, let-7a-2-3p, miR-3187-3p

miR-877-5p, miR-9788-3p, miR-216a-3p, miR-29a-3p, miR-505-5p, miR-552-3p, miR-3065-3p, miR-29b, miR-29d-3p, miR-2387, miR-3065-3p, miR-486-3p, miR-29c-3p, miR-486b-3p, miR-29a, miR-378a-5p, miR-29b-3p

CD164 ENSOARGO(CD164 mo

ATF3 ENSOARGO(activati

FAM160B2 ENSOARGO( family w

|       |                   |                                                                                                                                                                                                                                                                                                                                                                                                                                                                                                                                                                                                                                                                                                                                                                                                                                                                                                                                                                                                                                                                                                                                                                                                                                                                                                                                                                                                                                                                                                                                                                                                                                                                                                                                                                                                                                                                                                                                                                                                                                                                                                                                      |
|-------|-------------------|--------------------------------------------------------------------------------------------------------------------------------------------------------------------------------------------------------------------------------------------------------------------------------------------------------------------------------------------------------------------------------------------------------------------------------------------------------------------------------------------------------------------------------------------------------------------------------------------------------------------------------------------------------------------------------------------------------------------------------------------------------------------------------------------------------------------------------------------------------------------------------------------------------------------------------------------------------------------------------------------------------------------------------------------------------------------------------------------------------------------------------------------------------------------------------------------------------------------------------------------------------------------------------------------------------------------------------------------------------------------------------------------------------------------------------------------------------------------------------------------------------------------------------------------------------------------------------------------------------------------------------------------------------------------------------------------------------------------------------------------------------------------------------------------------------------------------------------------------------------------------------------------------------------------------------------------------------------------------------------------------------------------------------------------------------------------------------------------------------------------------------------|
| C2CD2 | ENSOARGO(C2 calci | <p>miR-450a-1-3p, miR-328-3p, miR-450c-3p, miR-3141, miR-450a-1-3p, miR-6395, miR-3963, miR-1291, miR-450b-5p, miR-2426, miR-3957-3p, miR-122-5p, miR-2285r, miR-432-3p, miR-3141, miR-331-3p, miR-92a-1-5p, miR-2285n, miR-543-5p, miR-2898, miR-450b-3p, miR-124-5p, miR-331-5p, miR-376c-3p, miR-542-5p, miR-2355-5p, miR-30e-5p, miR-301, miR-23b, miR-1197-3p, let-7e-3p, miR-2284v, novel_9, miR-505-5p, miR-2284z, miR-429-3p, miR-30c, miR-196a-5p, miR-1343-5p, miR-450b-5p, miR-148b-5p, novel_39, miR-2284y, miR-200a, miR-3064-5p, miR-200a-3p, miR-152-3p, novel_127, miR-664-3p, miR-144-3p, miR-677, miR-181b-3p, miR-3074-5p, miR-410-5p, miR-146b-5p, miR-378f, miR-148a-3p, miR-150-5p, miR-1306, miR-216a-3p, miR-3591-3p, miR-301b-3p, miR-335-5p, miR-6119-3p, miR-206, miR-379-3p, miR-1247-3p, miR-208a-3p, miR-412-5p, miR-3535, miR-3431, novel_116, miR-16-1-3p, miR-27b-3p, miR-542-3p, novel_23, let-7a-2-3p, miR-503-3p, miR-6240, miR-668-3p, miR-196b-5p, miR-106b-3p, miR-146a, miR-365b-5p, miR-105-5p, miR-194a, miR-301a-3p, miR-376e-3p, miR-216b-5p, miR-2331-3p, miR-216b-3p, miR-625-5p, miR-1827, miR-299, miR-129b-3p, miR-411, miR-30d-5p, miR-6525, miR-224-5p, miR-3074-5p, miR-3184-3p, miR-3958-5p, novel_74, miR-190a-5p, miR-454-3p, miR-130b-5p, miR-30e-3p, miR-30a-3p, miR-151-3p, miR-3604, miR-664a-5p, miR-23b-3p, miR-7859, miR-23c, miR-18a-3p, miR-30d-3p, miR-493-3p, miR-33b-3p, miR-16-1-3p, miR-361-5p, miR-378i, miR-30c-5p, miR-1434-5p, miR-378a-3p, miR-664b-3p, miR-376a-5p, miR-376c-3p, miR-486-3p, miR-2285p, miR-208b-3p, miR-500a-5p, miR-422a, miR-25, miR-139-5p, miR-2284g, miR-335-3p, miR-140-5p, miR-378j, novel_111, miR-2447, miR-499a-5p, miR-3964, miR-218-5p, miR-153, miR-147a, miR-455-3p, miR-421, miR-2459, miR-199b-3p, miR-330-3p, miR-1343-3p, novel_78, miR-1388-5p, miR-1839-5p, miR-1a-3p, miR-378d, miR-2310, miR-1388-3p, miR-23a-3p, miR-487b-5p, miR-130b-3p, miR-146b, miR-153-3p, miR-103a-2-5p, miR-199a-3p, miR-365a-3p, miR-3965, miR-370-3p, miR-141-3p, let-7g-3p, novel_48, miR-7144-5p, miR-1814c, miR-488-3p, miR-362-</p> |
| SIAE  | ENSOARGO(sialic a |                                                                                                                                                                                                                                                                                                                                                                                                                                                                                                                                                                                                                                                                                                                                                                                                                                                                                                                                                                                                                                                                                                                                                                                                                                                                                                                                                                                                                                                                                                                                                                                                                                                                                                                                                                                                                                                                                                                                                                                                                                                                                                                                      |

miR-652b, miR-206-3p, let-7b-5p, miR-6134, miR-433-5p, let-7b, miR-129-2-3p, miR-3184-3p, miR-3074-5p, miR-4510, miR-214, miR-665-5p, miR-3074-2-3p, miR-450b-3p, miR-6516-3p, miR-17-3p, miR-664a, miR-190a-5p, miR-130b-5p, miR-2285j, let-7f, miR-151-3p, miR-320e, miR-3604, miR-655-3p, miR-377-3p, miR-376e-3p, miR-216b-5p, miR-323-5p, miR-6130, let-7i-5p, miR-140-5p, miR-30c-1-3p, miR-1277-3p, miR-370-5p, miR-21-3p, miR-296-3p, miR-1827, miR-450a-1-3p, miR-129b-3p, miR-655, miR-376a-5p, miR-377-5p, miR-146a-5p, miR-2411, miR-2432, miR-2424, miR-143-3p, miR-345-3p, miR-320d, miR-98-5p, let-7k, miR-26a-5p, miR-125b, miR-92a-1-5p, miR-185-3p, miR-210-3p, miR-383-5p, miR-148b-3p, novel\_83, miR-380-5p, miR-505-3p, miR-212-5p, miR-4429, miR-33b-3p, miR-664-5p, miR-148a-5p, miR-2366, miR-1961, miR-2904, miR-188-3p, miR-5703, miR-140-3p, miR-361-3p, miR-154a, miR-9-5p, miR-190b-5p, miR-4726-5p, miR-3968, miR-101-3p, miR-3596, miR-378g, miR-489, let-7d-5p, miR-4443, miR-147-3p, miR-361-3p, miR-140-5p, miR-378j, miR-1306-3p, miR-30c-1-3p, miR-8485, let-7a-5p, miR-1839-3p, miR-494-3p, miR-652-5p, miR-491-5p, miR-487b-5p, miR-146b, let-7e, miR-214-3p, miR-342, miR-320b, novel\_103, miR-5126, miR-2957, miR-148b-5p, miR-9788-3p, novel\_78, novel\_4, miR-1343-3p, miR-151a-3p, miR-101c, miR-6529a, miR-2284r, miR-4791, miR-143-5p, miR-1a-3p, miR-30b-3p, miR-125b-2-3p, miR-6128, novel\_9, miR-767-5p, miR-2433, miR-551b-3p, miR-29b-3p, miR-1306-3p, miR-370-5p, miR-5100, miR-125b-5p, miR-100-3p, miR-409-3p, miR-300-3p, miR-376c-3p, miR-154b-5p, miR-574-5p, miR-3068-3p, miR-2355-5p, miR-370-3p, miR-125a, miR-767, miR-876-3p, miR-10b-3p, miR-329b, miR-23a-5p, miR-671-5p, miR-485-5p, miR-424-3p, miR-2448-3p, miR-320a, miR-380-5p, let-7g, miR-376c-5p, miR-1271-3p, miR-3529-3p, miR-2325-3p, miR-1, miR-17-3p, miR-150a-2-

HIF3A      ENSOARG0(hypoxia)

miR-181b-1-3p, miR-376a-5p, novel\_17, miR-210-5p, miR-125b, miR-185-3p, miR-324-3p, miR-2284m, miR-299-3p, miR-21-3p, miR-3653-3p, miR-3960, miR-548e-3p, miR-30d-3p, miR-3600, miR-15a-5p, miR-95-3p, miR-7859, miR-2300b-3p, miR-215-5p, miR-191, miR-2904, miR-33b-3p, miR-2284u, miR-148a-5p, miR-218-1-3p, miR-4510, miR-3074-2-3p, miR-346, miR-30e-3p, miR-2285j, miR-29b-2-5p, miR-665, miR-151-3p, miR-30a-3p, miR-487b-5p, novel\_74, miR-454-3p, miR-424-5p, miR-548o-3p, miR-496-3p, miR-140-5p, miR-30c-1-3p, miR-6130, miR-301a-3p, miR-499b-3p, miR-192-5p, miR-15b-5p, miR-22-3p, novel\_25, miR-487b-5p, miR-133b-3p, let-7g-3p, miR-2312, miR-1827, miR-885-3p, miR-424-5p, miR-1388-3p, miR-2284b, miR-30c-1-3p, miR-758-3p, miR-4532, miR-16b, miR-130b-3p, miR-330-3p, miR-151a-3p, miR-181b-2-3p, miR-27a-3p, miR-9788-3p, miR-148b-5p, miR-6529a, miR-758-3p, miR-2426, miR-3120-5p, miR-2284aa, miR-885-5p, miR-3956-3p, miR-3059-5p, novel\_60, miR-2284j, miR-2285f, novel\_111, miR-361-3p, miR-615, miR-335, miR-452-3p, miR-2284g, miR-2285u, miR-499a-3p, miR-27a-3p, miR-140-5p, miR-361-3p, miR-668-5p, miR-136-5p, miR-493-5p, miR-335-3p, miR-29b-2-5p, miR-30a-3p, miR-148b-5p, miR-2284a, miR-1271-3p, miR-192-3p, novel\_39, miR-2284y, miR-6119-5p, miR-205-5p, miR-30c-2-3p, miR-2898, miR-107, miR-6517, miR-299a-3p, miR-322-5p, miR-214-5p, miR-545-5p, miR-2284z, miR-1290, miR-615-3p, miR-29d-3p, miR-885-3p, miR-496, miR-128-3p, miR-2284v, novel\_42, miR-133a-3p, miR-16-5p, miR-494-5p, miR-2284k, miR-29b-3p, miR-125b-5p, miR-6740-5p, miR-331-5p, miR-138-5p, miR-191-5p, miR-503-3p, miR-215-5p, miR-125a, miR-2285aa, miR-331-5p, miR-133c, miR-424-3p, miR-331-5p, miR-488-3p, miR-137-3p, miR-10b-3p, miR-23a-5p, miR-6240, miR-493-5p, miR-668-3p, miR-654-3p, novel\_51, miR-330-3p, miR-124-5p, miR-125a-5p, miR-103a-3p, miR-3955-5p, miR-

miR-491-3p, let-7c-3p, miR-376b, miR-106a-5p, miR-424-5p, miR-494-3p, miR-1185-5p, miR-491-5p, miR-3955-3p, miR-505, miR-106b-5p, miR-16b, miR-182-5p, miR-539-5p, miR-147a, miR-199b-3p, miR-1839-5p, miR-6529a, miR-301b-5p, miR-1285-5p, miR-219a-2-3p, miR-181d-5p, miR-2284j, miR-4454, miR-3059-5p, miR-374a-3p, miR-301a-5p, miR-218-5p, miR-3596, miR-25, miR-489, miR-2285u, miR-499b-5p, miR-381-3p, miR-129b-5p, miR-664b-3p, miR-376a-5p, miR-125b-2-3p, miR-130a-5p, miR-20a, miR-1277-5p, miR-106a, miR-2284m, miR-466i-5p, miR-216a-5p, miR-500a-5p, miR-345-3p, miR-2285p, miR-328-3p, miR-7859, miR-200b, miR-15a-5p, miR-548e-3p, miR-106a, miR-664-5p, miR-2284u, miR-98-3p, miR-1193, miR-181c-5p, miR-6525, miR-98-3p, miR-2330-3p, miR-433-5p, miR-590-3p, miR-539-5p, miR-487a-5p, miR-208b-5p, miR-424-5p, miR-450b-3p, miR-6516-3p, miR-17-3p, miR-219b-3p, miR-2285j, miR-15b-5p, miR-656-3p, miR-216b-5p, miR-216b-3p, miR-182-5p, miR-660-5p, miR-543-3p, novel\_99, miR-450a-1-3p, miR-296-3p, miR-668-3p, miR-382, miR-660, miR-466f-3p, miR-378a-5p, miR-17-5p, miR-106a-5p, miR-2411-3p, miR-296-3p, miR-20b, miR-2284d, miR-497-5p, miR-2284x, miR-188-5p, miR-16b, miR-450c-3p, miR-374b-3p, miR-542-3p, miR-181a-5p, miR-323c, miR-371b-3p, miR-17-3p, miR-2285x, miR-1a-1-5p, miR-199c, miR-6119-3p, miR-379-3p, miR-16a, miR-15a, miR-20a-5p, miR-142b, miR-133a-5p, novel\_69, miR-2319a, miR-195a-5p, miR-6395, miR-21c, miR-3065-5p, miR-216a-3p, miR-200a, miR-29a-5p, miR-2284y, miR-192-3p, miR-181a-2-3p, novel\_96, miR-17-3p, miR-181b-5p, miR-1a-2-5p, miR-200c-3p, miR-2285af, miR-200c, miR-219-3p, miR-582-3p, miR-545-5p, miR-450a-1-3p, miR-322-5p, miR-6516-5p, miR-429-3p, miR-128-3p, miR-200b-3p, miR-345-3p, miR-3578, miR-145-3p, miR-93, miR-374a-3p, miR-16-5p, miR-3607-3p, miR-374b-3p, miR-100-3p, miR-2284k, miR-1-5p, miR-365a-3p, miR-502b, miR-3969, miR-101-3p, miR-877-3p, miR-1271, novel\_101, novel\_48, miR-9851-3p, miR-186-5p, miR-96-5p, miR-10b-3p, miR-329a, miR-148a-3p, miR-146b-3p, miR-452-5p, miR-152-3p, miR-127-5p, miR-30f, miR-362-3p, miR-127-3p, miR-101c, miR-362-3p, miR-2426, miR-5703, miR-329-3p, miR-126-3p, miR-362-3p, miR-542-3p, miR-3578, novel\_83, miR-24-2-5p, miR-1271-5p, miR-148b-3p

miR-217, miR-2285af, novel\_96, miR-200a-3p, miR-152-3p, miR-107, miR-191-3p, miR-181b-5p, miR-4286, miR-3064-5p, miR-1, miR-2285b, miR-330-5p, miR-134, miR-18b-5p, miR-423-3p, miR-299a-3p, miR-486-5p, miR-450a-1-3p, miR-134-5p, miR-378h, miR-505-5p, miR-331-3p, miR-100-3p, miR-125b-5p, miR-6740-5p, miR-135a-1-3p, miR-2433, miR-134-5p, miR-126b-3p, novel\_42, miR-378c, miR-18a, miR-3154, miR-23b, miR-1248, miR-485-5p, miR-23a-5p, miR-329a, miR-1271, miR-141-3p, miR-125a, miR-2355-5p, miR-542-5p, miR-370-3p, miR-324-5p, miR-365a-3p, novel\_51, miR-197-5p, miR-296-3p, miR-106b-3p, miR-125a-5p, miR-124-5p, miR-296-3p, miR-432-3p, miR-3071-5p, miR-450c-3p, miR-1843b-5p, miR-181a-5p, miR-1434-3p, miR-873a-5p, miR-188-5p, miR-7862, miR-103a-3p, miR-187-3p, miR-103, miR-194-3p, novel\_116, miR-185-5p, miR-134-3p, miR-3431, miR-6529b, miR-147-5p, novel\_1, miR-206, miR-542-5p, miR-326-3p, miR-18b, miR-148a-3p, miR-2387, miR-378f, miR-6395, miR-412-3p, miR-107, miR-450b-3p, miR-1291, miR-320b, miR-299b-3p, miR-411b-3p, miR-125b, miR-185-3p, miR-422a, miR-500a-5p, miR-324-3p, novel\_17, miR-542-5p, miR-210-5p, miR-299-3p, miR-466i-5p, miR-345-3p, miR-1197-5p, miR-378a-3p, miR-5703, miR-217-5p, miR-362-3p, miR-2366, miR-378i, novel\_133, miR-133a-3p, miR-184-3p, miR-212-5p, miR-3960, miR-328-3p, novel\_83, miR-151-5p, miR-23c, miR-148b-3p, miR-23b-3p, miR-383-5p, miR-665, miR-132-5p, miR-324-3p, miR-450b-3p, miR-214, miR-3184-3p, miR-4510, miR-378c, miR-433-5p, miR-338-3p, miR-6134, miR-181c-5p, miR-206-3p, miR-346, miR-433-3p, miR-450a-1-3p, miR-299, miR-1895, miR-625-5p, miR-18a-5p, miR-296-3p, miR-140-5p, miR-378a-3p, miR-504-5p, miR-877-5p, miR-151b, miR-204-3p, novel\_32, miR-6130, miR-2284s, miR-362-3p, miR-505, miR-326, miR-5126, miR-103a-2-5p, miR-542-5p, miR-214-3p, miR-25-5p, miR-3085-3p, miR-191-3p, miR-204-5p, miR-592, miR-424-5p, miR-31-3p, miR-664a, miR-16-5p, miR-3074-5p, miR-1248, miR-7144-5p, let-7g-3p, miR-320a, miR-301, miR-488-3p, miR-15b-5p, miR-182-5p, miR-141-3p, miR-370-3p, miR-200a-3p, miR-320d, miR-210-5p, miR-2285af, miR-377-5p, miR-142a-3p, let-7a-2-3p, miR-582-3p, miR-4429, miR-23b-5p, miR-3578, miR-545-5p, miR-616-3p, miR-15a-5p, miR-322-5p, miR-107-5p, miR-16a, miR-6402, miR-15a, miR-502-5p, miR-211, miR-1983, miR-195a-5p, miR-9851-3p, miR-412-3p, miR-381-3p, miR-378b, miR-320c, miR-2404, miR-211-5p, miR-541-5p, miR-320b, miR-3074-5p, miR-16b, miR-455-5p, miR-182-5p, miR-320b, let-7a-2-3p, miR-424-5p, miR-2330-5p, miR-455-5p, miR-497-5p, miR-219a-1-3p, miR-16b, miR-1434-3p, miR-455-3p, miR-185-5p, miR-142-3p, miR-377-5p, miR-548o-3p, miR-452-3p, miR-548e-3p, miR-30c-1-3p, miR-185-5p, miR-7859, miR-300-3p, miR-143-5p, miR-150-5p, miR-19a-3p, miR-19b-3p, miR-30c-1-3p, novel\_17, miR-2285af, miR-30c-2-3p, miR-3964

miR-299a-5p, miR-2284q, miR-2285af, miR-299, miR-2285p, miR-188-3p

|        |                    |  |
|--------|--------------------|--|
| VSI2   | ENSOARGO(V-set an  |  |
| ARC1   | ENSOARGO(archain   |  |
| CPD    | ENSOARGO(carboxyp  |  |
| CLDN34 | ENSOARGO(c Claudin |  |

|       |                    |                                                                                                                                                                                                                                                                                                                                                                                                                                                                                                                                                                                                                                                                                                                                                                                                                                                                                                                                                                                                                                                                                                                                                                                                                                                                                                                                                                                                                                                                                                                                                                                                                                                                                                                                                                                                                                                                                                                                                                                                                                                                                                                                                                                                                                                                                                                                                                                                                                                                                                                                                                                                                                                                                                                                                                                                                                                                        |
|-------|--------------------|------------------------------------------------------------------------------------------------------------------------------------------------------------------------------------------------------------------------------------------------------------------------------------------------------------------------------------------------------------------------------------------------------------------------------------------------------------------------------------------------------------------------------------------------------------------------------------------------------------------------------------------------------------------------------------------------------------------------------------------------------------------------------------------------------------------------------------------------------------------------------------------------------------------------------------------------------------------------------------------------------------------------------------------------------------------------------------------------------------------------------------------------------------------------------------------------------------------------------------------------------------------------------------------------------------------------------------------------------------------------------------------------------------------------------------------------------------------------------------------------------------------------------------------------------------------------------------------------------------------------------------------------------------------------------------------------------------------------------------------------------------------------------------------------------------------------------------------------------------------------------------------------------------------------------------------------------------------------------------------------------------------------------------------------------------------------------------------------------------------------------------------------------------------------------------------------------------------------------------------------------------------------------------------------------------------------------------------------------------------------------------------------------------------------------------------------------------------------------------------------------------------------------------------------------------------------------------------------------------------------------------------------------------------------------------------------------------------------------------------------------------------------------------------------------------------------------------------------------------------------|
| YIPF4 | ENSOARGO(Yip1 dom) | <p>miR-6128, miR-194b-5p, miR-452-5p, miR-181d-5p, miR-142a-5p, miR-3959-3p, miR-7705, miR-181c-5p, miR-142b, miR-29b-2-5p, miR-203b-5p, miR-24-1-5p, miR-3120-3p, miR-877-5p, miR-140-5p, miR-2285w, miR-494-3p, miR-29b-2-5p, miR-24-2-5p, miR-421-5p, miR-2432, miR-618, miR-194a, miR-181b-5p, miR-548w, miR-3600, miR-142-5p, miR-9788-3p, miR-148b-5p, miR-2284z, miR-2284h-5p, miR-181a-5p, miR-194-5p, novel_23, miR-2426, miR-142-3p, miR-2284aa, miR-148a-5p, miR-543-5p, miR-339a, miR-2285af, miR-6119-5p, miR-376c-5p, miR-1271-3p, miR-380-5p, miR-1, miR-3529-3p, miR-105-2, miR-10a-5p, let-7a-2-3p, miR-300, miR-3578, miR-545-5p, miR-582-3p, miR-214-5p, miR-24-2-5p, miR-302a-5p, miR-7641, miR-204-5p, miR-138-5p, miR-331-3p, miR-135a-5p, miR-34c-3p, miR-370-5p, miR-99b-3p, miR-135a-1-3p, miR-5100, miR-145-3p, miR-323-3p, miR-93, miR-103b, miR-1306-5p, miR-23a-5p, miR-485-5p, let-7g-3p, miR-17-5p, miR-18a, miR-381-3p, miR-488-3p, miR-2448-3p, miR-2284n, miR-365a-3p, miR-370-3p, miR-660, miR-125a-5p, miR-124-5p, miR-190a, miR-106a-5p, miR-17-5p, miR-539-3p, miR-138, miR-2284ab, miR-194-5p, miR-20b, miR-2284d, miR-130a-3p, miR-665, miR-22-5p, novel_1, miR-382-5p, miR-20a-5p, miR-133a-5p, miR-326-3p, miR-2428, miR-211, miR-1193, novel_101, novel_120, miR-342-3p, miR-505-3p, miR-135b-5p, miR-1291, miR-19a-3p, miR-2387, miR-18b, miR-670-3p, miR-320b, miR-10a-5p, miR-30b-3p, miR-21-3p, miR-106a, miR-2284m, miR-216a-5p, miR-125b, miR-374a-5p, miR-20a, miR-216c-5p, miR-19b-3p, miR-2904, miR-188-3p, miR-140-3p, miR-5703, miR-2300b-3p, novel_83, miR-532-3p, miR-151-5p, miR-487a-3p, miR-505-3p, miR-485-3p, miR-450b-3p, miR-664a, miR-324-3p, miR-338-5p, miR-338-3p, miR-10b-5p, miR-206-3p, miR-3074-2-3p, miR-4510, novel_99, miR-18a-5p, miR-6130, miR-139-5p, miR-370-5p, miR-660-5p, miR-342, novel_103, miR-326, miR-758-3p, miR-106a-5p, miR-2284aa, miR-450b-5p, miR-101a-5p, miR-10b, miR-9788-3p, miR-2320-3p, miR-105-1, novel_4, miR-151a-3p, miR-2284q, miR-3958-3p, miR-2285y, miR-1973, miR-107-5p, miR-219a-2-3p, miR-194b-5p, miR-541-3p, miR-7857-3p, miR-219-3p, novel_39, miR-192-3p, miR-450b-5p, miR-148b-5p, miR-330-5p, miR-23b-5p, miR-450a-1-3p, miR-2284z, miR-129-1-3p, novel_79, miR-18b-5p, miR-2285ad, miR-125b-5p, miR-2284k, miR-2284v, miR-20b-5p, miR-16b, miR-885-3p, miR-4508, miR-497-5p, miR-484, miR-217-5p, miR-1343-5p, miR-3431, miR-15a-5p, miR-322-5p, miR-487a-3p, miR-328-3p, miR-485-3p, miR-339-5p, novel_79, miR-6536, miR-3085-3p, miR-543-5p, miR-1343-5p, miR-210-5p, miR-339a, miR-16b, miR-217, miR-539-3p, miR-4532, miR-424-5p, miR-3064-5p, miR-339b, miR-195a-5p, miR-6395, miR-885-3p, miR-361-3p, miR-15b-5p, miR-4443, miR-669, miR-3064-5p, miR-2355-5p, miR-424-5p, miR-15a, miR-485-3p, miR-16a, miR-2428, miR-665-5p, miR-16-5p</p> |
| NBEA  | ENSOARGO(neurobea) | <p>miR-670-3p, miR-320b, miR-10a-5p, miR-30b-3p, miR-21-3p, miR-106a, miR-2284m, miR-216a-5p, miR-125b, miR-374a-5p, miR-20a, miR-216c-5p, miR-19b-3p, miR-2904, miR-188-3p, miR-140-3p, miR-5703, miR-2300b-3p, novel_83, miR-532-3p, miR-151-5p, miR-487a-3p, miR-505-3p, miR-485-3p, miR-450b-3p, miR-664a, miR-324-3p, miR-338-5p, miR-338-3p, miR-10b-5p, miR-206-3p, miR-3074-2-3p, miR-4510, novel_99, miR-18a-5p, miR-6130, miR-139-5p, miR-370-5p, miR-660-5p, miR-342, novel_103, miR-326, miR-758-3p, miR-106a-5p, miR-2284aa, miR-450b-5p, miR-101a-5p, miR-10b, miR-9788-3p, miR-2320-3p, miR-105-1, novel_4, miR-151a-3p, miR-2284q, miR-3958-3p, miR-2285y, miR-1973, miR-107-5p, miR-219a-2-3p, miR-194b-5p, miR-541-3p, miR-7857-3p, miR-219-3p, novel_39, miR-192-3p, miR-450b-5p, miR-148b-5p, miR-330-5p, miR-23b-5p, miR-450a-1-3p, miR-2284z, miR-129-1-3p, novel_79, miR-18b-5p, miR-2285ad, miR-125b-5p, miR-2284k, miR-2284v, miR-20b-5p, miR-16b, miR-885-3p, miR-4508, miR-497-5p, miR-484, miR-217-5p, miR-1343-5p, miR-3431, miR-15a-5p, miR-322-5p, miR-487a-3p, miR-328-3p, miR-485-3p, miR-339-5p, novel_79, miR-6536, miR-3085-3p, miR-543-5p, miR-1343-5p, miR-210-5p, miR-339a, miR-16b, miR-217, miR-539-3p, miR-4532, miR-424-5p, miR-3064-5p, miR-339b, miR-195a-5p, miR-6395, miR-885-3p, miR-361-3p, miR-15b-5p, miR-4443, miR-669, miR-3064-5p, miR-2355-5p, miR-424-5p, miR-15a, miR-485-3p, miR-16a, miR-2428, miR-665-5p, miR-16-5p</p>                                                                                                                                                                                                                                                                                                                                                                                                                                                                                                                                                                                                                                                                                                                                                                                                                                                                                                                                                                                                                                                                                                                                                                                                                                                                                                                                                                                    |
| DOK2  | ENSOARGO(docking)  | <p>miR-339a, miR-16b, miR-217, miR-539-3p, miR-4532, miR-424-5p, miR-3064-5p, miR-339b, miR-195a-5p, miR-6395, miR-885-3p, miR-361-3p, miR-15b-5p, miR-4443, miR-669, miR-3064-5p, miR-2355-5p, miR-424-5p, miR-15a, miR-485-3p, miR-16a, miR-2428, miR-665-5p, miR-16-5p</p>                                                                                                                                                                                                                                                                                                                                                                                                                                                                                                                                                                                                                                                                                                                                                                                                                                                                                                                                                                                                                                                                                                                                                                                                                                                                                                                                                                                                                                                                                                                                                                                                                                                                                                                                                                                                                                                                                                                                                                                                                                                                                                                                                                                                                                                                                                                                                                                                                                                                                                                                                                                          |

|        |                    |                                                                                                                                                                                                                                                                                                                                                                                                                                                                                                                                                                                                                                                                                                                                                                                                                                                                                                                                                                                                                                                                                                                                                                                                                                                                                                                                                                                                                                                                                                                                                                                                                                                                                                                                                                                                                                                                                                                                                                                                                                                                                                                                                                                                                                                                                                                                                                                                                                                                                                                                                                                                                                                                                                                                                                                                                                                                                                                                                                                                                                                                                                                                                                            |
|--------|--------------------|----------------------------------------------------------------------------------------------------------------------------------------------------------------------------------------------------------------------------------------------------------------------------------------------------------------------------------------------------------------------------------------------------------------------------------------------------------------------------------------------------------------------------------------------------------------------------------------------------------------------------------------------------------------------------------------------------------------------------------------------------------------------------------------------------------------------------------------------------------------------------------------------------------------------------------------------------------------------------------------------------------------------------------------------------------------------------------------------------------------------------------------------------------------------------------------------------------------------------------------------------------------------------------------------------------------------------------------------------------------------------------------------------------------------------------------------------------------------------------------------------------------------------------------------------------------------------------------------------------------------------------------------------------------------------------------------------------------------------------------------------------------------------------------------------------------------------------------------------------------------------------------------------------------------------------------------------------------------------------------------------------------------------------------------------------------------------------------------------------------------------------------------------------------------------------------------------------------------------------------------------------------------------------------------------------------------------------------------------------------------------------------------------------------------------------------------------------------------------------------------------------------------------------------------------------------------------------------------------------------------------------------------------------------------------------------------------------------------------------------------------------------------------------------------------------------------------------------------------------------------------------------------------------------------------------------------------------------------------------------------------------------------------------------------------------------------------------------------------------------------------------------------------------------------------|
|        |                    | miR-199a-5p, miR-3065-3p, novel_39, miR-30b-3p, novel_127, miR-324-3p, miR-9-5p, miR-2285ad, miR-18a-3p, miR-3600, miR-133a-3p, miR-362-3p, miR-2300b-3p, miR-140-3p, miR-133a-3p, miR-138-5p, miR-4492, miR-204-5p, miR-5100, miR-100-3p, miR-664a-5p, miR-665, miR-22-3p, miR-199a-5p, miR-660-5p, miR-3065-3p, miR-2355-5p, miR-133b-3p, let-7g-3p, miR-329a, miR-2285c, miR-129b-3p, miR-363-5p, miR-199b-5p, miR-660, miR-362-3p, miR-2285g, miR-134-3p, miR-2285e, novel_78, miR-138, miR-30b-3p, miR-362-3p, miR-329-3p, miR-484, miR-541, miR-22-3p, miR-30b-3p, miR-361-3p, miR-211, novel_111, miR-199b-5p, novel_60, miR-3956-3p, miR-541-3p, miR-9-5p, miR-6123, miR-378g, miR-3596, miR-4443, miR-2319b, miR-3120-3p, miR-211-5p, miR-199b-5p, miR-18a-3p, miR-324-3p, miR-326, miR-30b-3p, miR-214-3p, miR-760-3p, miR-345-3p, miR-4532, miR-503-3p, miR-2285i, miR-376a-5p, miR-22-3p, miR-330-5p, miR-484, miR-6529a, miR-653, miR-361-5p, miR-582-3p, miR-455-3p, miR-129-1-3p, miR-185-5p, miR-3431, miR-576-3p, miR-374a-3p, miR-4492, miR-374b-3p, miR-664a, miR-495-3p, miR-214, novel_42, miR-129-2-3p, miR-122-5p, miR-326-3p, miR-2428, miR-374a-3p, miR-21a-3p, miR-2387, miR-485-5p, miR-10b-3p, miR-2285k, miR-2355-5p, miR-3120-3p, miR-22-3p, miR-2284j, miR-194b-5p, miR-181d-5p, miR-877-3p, miR-502-3p, miR-8095, miR-101-3p, miR-2284q, miR-452-3p, miR-10b, miR-664b, miR-2284g, miR-541-5p, miR-7689-3p, miR-499b-5p, miR-1185-2-3p, miR-500-3p, miR-203-3p, miR-221, miR-381-3p, miR-668-5p, miR-544-5p, miR-1983, miR-493-5p, miR-494-3p, miR-101b-3p, miR-424-5p, miR-33a-5p, miR-676-3p, let-7c-3p, miR-30c-1-3p, miR-2310, miR-199a-3p, miR-320b, miR-16b, miR-505, miR-29b-1-5p, miR-214-3p, miR-199b-3p, miR-2300a-5p, novel_78, miR-151a-3p, miR-145b, miR-1185-3p, miR-148b-5p, miR-221-3p, miR-10b, miR-501-3p, miR-3120-5p, miR-101c, miR-145a-3p, miR-3074-5p, miR-3184-3p, miR-590-3p, miR-539-5p, miR-214, miR-2330-3p, miR-224-5p, miR-10b-5p, miR-181c-5p, miR-222-3p, miR-338-5p, miR-320e, miR-151-3p, miR-17-3p, miR-450b-3p, miR-500, miR-424-5p, miR-548c-3p, miR-660-5p, miR-30c-1-3p, miR-545-3p, miR-2331-3p, miR-10a, miR-192-5p, miR-15b-5p, miR-450a-1-3p, miR-21a-3p, miR-500a-3p, let-7g-3p, miR-186-5p, miR-183-5p, miR-125b-2-3p, miR-29b-1-5p, miR-376a-5p, miR-421-5p, miR-143-3p, miR-380-3p, miR-2432, miR-2285p, miR-196a-3p, miR-92a-1-5p, miR-345-3p, miR-324-3p, miR-216a-5p, miR-2284m, miR-320d, miR-2484, miR-3653-3p, miR-34b-5p, miR-485-3p, miR-505-3p, miR-15a-5p, miR-487a-3p, miR-199a-3p, miR-2300b-3p, miR-215-5p, miR-376a-5p, miR-217-5p, miR-1434-5p, miR-4429, novel_73, miR-2284u, miR-378d, miR-34a-5p, miR-2285x, miR-17-3p, novel_27, miR-449a, miR-6402, miR-502-5p, miR-15a, miR-382-5p, miR-34c, miR-485-3p, miR-16a, miR-379-3p, miR-199c, miR-421-5p, miR-203b-5p, miR-3074-5p, miR-10a-5p, miR-3120-3p, miR-7-1-3p, miR-320b, miR-34b, miR-320c, miR-21c, miR-412-3p, miR-195a-5p, miR-505-3p, miR-6516-3p, miR-2319a, miR-493-5p, miR-628-5p, miR-382, miR-2284l, miR-224-5p, miR-194a, miR-2411-3p, miR-455-5p, miR-107-5p, miR-660, miR-132-5p, miR-2284d, miR-1434- |
| ABCA7  | ENSOARGO( ATP-bind |                                                                                                                                                                                                                                                                                                                                                                                                                                                                                                                                                                                                                                                                                                                                                                                                                                                                                                                                                                                                                                                                                                                                                                                                                                                                                                                                                                                                                                                                                                                                                                                                                                                                                                                                                                                                                                                                                                                                                                                                                                                                                                                                                                                                                                                                                                                                                                                                                                                                                                                                                                                                                                                                                                                                                                                                                                                                                                                                                                                                                                                                                                                                                                            |
| CALM2  | ENSOARGO( calmodul |                                                                                                                                                                                                                                                                                                                                                                                                                                                                                                                                                                                                                                                                                                                                                                                                                                                                                                                                                                                                                                                                                                                                                                                                                                                                                                                                                                                                                                                                                                                                                                                                                                                                                                                                                                                                                                                                                                                                                                                                                                                                                                                                                                                                                                                                                                                                                                                                                                                                                                                                                                                                                                                                                                                                                                                                                                                                                                                                                                                                                                                                                                                                                                            |
| ZNF207 | ENSOARGO( zinc fin |                                                                                                                                                                                                                                                                                                                                                                                                                                                                                                                                                                                                                                                                                                                                                                                                                                                                                                                                                                                                                                                                                                                                                                                                                                                                                                                                                                                                                                                                                                                                                                                                                                                                                                                                                                                                                                                                                                                                                                                                                                                                                                                                                                                                                                                                                                                                                                                                                                                                                                                                                                                                                                                                                                                                                                                                                                                                                                                                                                                                                                                                                                                                                                            |



|        |                   |                                                                                                                                                                                                                                                                                                                                                                                                                                                                                                                                                                                                                                                                                                                                                                                                                                                                                                                                                                                                                                                                                                                                                                                                                                                                                                                                                                                                                                                                                                                                                                                                                                                                                                                                                                                                                                                                                                                                                                                                                                                                                                                                                                                                                                                                                                                                                                                                                                                                                                                                  |
|--------|-------------------|----------------------------------------------------------------------------------------------------------------------------------------------------------------------------------------------------------------------------------------------------------------------------------------------------------------------------------------------------------------------------------------------------------------------------------------------------------------------------------------------------------------------------------------------------------------------------------------------------------------------------------------------------------------------------------------------------------------------------------------------------------------------------------------------------------------------------------------------------------------------------------------------------------------------------------------------------------------------------------------------------------------------------------------------------------------------------------------------------------------------------------------------------------------------------------------------------------------------------------------------------------------------------------------------------------------------------------------------------------------------------------------------------------------------------------------------------------------------------------------------------------------------------------------------------------------------------------------------------------------------------------------------------------------------------------------------------------------------------------------------------------------------------------------------------------------------------------------------------------------------------------------------------------------------------------------------------------------------------------------------------------------------------------------------------------------------------------------------------------------------------------------------------------------------------------------------------------------------------------------------------------------------------------------------------------------------------------------------------------------------------------------------------------------------------------------------------------------------------------------------------------------------------------|
| CTNND1 | ENSOARGO(catenin) | <p>miR-107-5p, miR-410-5p, miR-15b-3p, novel_63, miR-6402, miR-374a-3p, miR-190a-5p, miR-374b-3p, miR-134-5p, miR-379-3p, miR-6516-3p, miR-1296-5p, miR-1271, miR-665-5p, miR-190b-5p, miR-2285x, miR-342-3p, miR-212-3p, miR-1285-5p, miR-374a-3p, miR-625-5p, miR-1248, miR-1827, miR-96-5p, miR-216b-3p, miR-221-5p, miR-216b-3p, miR-190a, miR-455-5p, novel_51, miR-342, novel_17, miR-221-5p, miR-30b-3p, miR-103a-2-5p, miR-450a-2-3p, miR-4286, miR-216c-5p, miR-2411, miR-2285r, miR-197-3p, miR-296-5p, miR-134, miR-21b, miR-361-5p, miR-455-5p, miR-411-3p, miR-671-3p, miR-134-5p, miR-455-3p, miR-185-5p, miR-2411-5p, miR-1271-5p, miR-1a-1-5p, miR-576-3p, miR-142b, miR-3074-5p, miR-3120-3p, miR-320c, miR-6535, miR-3141, miR-216a-3p, miR-146b-5p, miR-378f, miR-668-3p, miR-432-3p, miR-7-5p, miR-296-3p, miR-146a, miR-3141, miR-194a, novel_51, miR-31-5p, miR-3535, miR-134-3p, miR-194-3p, miR-149-5p, miR-432, miR-19b-2-5p, miR-2113, miR-7b-5p, miR-197-3p, miR-450c-3p, novel_23, miR-381-5p, miR-4508, miR-193a-5p, miR-2433, miR-125b-5p, miR-331-5p, novel_9, miR-592, miR-574-5p, miR-2355-5p, miR-125a, miR-376c-3p, miR-301, miR-331-5p, miR-345-5p, miR-450b-5p, miR-148b-5p, miR-664-3p, miR-3071-3p, miR-1a-2-5p, novel_127, novel_96, miR-2285ad, miR-429-3p, miR-412, miR-450a-1-3p, novel_121, miR-1290, miR-2427, miR-1343-5p, miR-23b-5p, miR-330-5p, miR-2447, miR-877-3p, novel_111, miR-1285-5p, miR-1843a-3p, miR-490-5p, miR-139-5p, miR-4792, miR-211-5p, miR-3596, miR-25, miR-378g, miR-4443, miR-140-5p, miR-409-5p, miR-378j, miR-504, miR-335-3p, miR-9-3p, miR-1388-3p, miR-378d, miR-29b-1-5p, miR-491-5p, miR-146b, miR-381-5p, miR-1343-3p, miR-145b, miR-425-3p, miR-147a, miR-455-3p, miR-2459, miR-2284r, miR-758-3p, miR-3074-5p, miR-665-5p, miR-6525, miR-224-5p, miR-181c-5p, miR-2285j, miR-4492, miR-130b-5p, miR-2331-3p, miR-504-5p, miR-548o-3p, miR-2284s, miR-376e-3p, miR-582-5p, miR-450a-1-3p, miR-433-3p, miR-345-5p, miR-543-3p, miR-1827, miR-186-5p, miR-10a-3p, miR-2285w, miR-345-3p, miR-376c-3p, miR-143-3p, miR-210-5p, novel_17, miR-500a-5p, miR-324-3p, miR-422a, miR-18a-3p, miR-210-3p, miR-2284h-5p, miR-378i, miR-378a-3p, miR-493-3p, miR-34a-5p, miR-3957-3p, miR-542-5p, miR-211, miR-24-3p, miR-371b-3p, miR-449a, miR-326-3p, miR-133a-5p, miR-34c, miR-656-5p, miR-378b, miR-34b, miR-18a-3p, miR-130b-5p, miR-382, miR-654-3p, miR-296-3p, miR-345-5p, miR-224-5p, miR-660, miR-452-5p, miR-125a-5p, miR-1343-5p, miR-187-</p> |
| PRKD2  | ENSOARGO(protein) | <p>4443, miR-140-5p, miR-409-5p, miR-378j, miR-504, miR-335-3p, miR-9-3p, miR-1388-3p, miR-378d, miR-29b-1-5p, miR-491-5p, miR-146b, miR-381-5p, miR-1343-3p, miR-145b, miR-425-3p, miR-147a, miR-455-3p, miR-2459, miR-2284r, miR-758-3p, miR-3074-5p, miR-665-5p, miR-6525, miR-224-5p, miR-181c-5p, miR-2285j, miR-4492, miR-130b-5p, miR-2331-3p, miR-504-5p, miR-548o-3p, miR-2284s, miR-376e-3p, miR-582-5p, miR-450a-1-3p, miR-433-3p, miR-345-5p, miR-543-3p, miR-1827, miR-186-5p, miR-10a-3p, miR-2285w, miR-345-3p, miR-376c-3p, miR-143-3p, miR-210-5p, novel_17, miR-500a-5p, miR-324-3p, miR-422a, miR-18a-3p, miR-210-3p, miR-2284h-5p, miR-378i, miR-378a-3p, miR-493-3p, miR-34a-5p, miR-3957-3p, miR-542-5p, miR-211, miR-24-3p, miR-371b-3p, miR-449a, miR-326-3p, miR-133a-5p, miR-34c, miR-656-5p, miR-378b, miR-34b, miR-18a-3p, miR-130b-5p, miR-382, miR-654-3p, miR-296-3p, miR-345-5p, miR-224-5p, miR-660, miR-452-5p, miR-125a-5p, miR-1343-5p, miR-187-</p>                                                                                                                                                                                                                                                                                                                                                                                                                                                                                                                                                                                                                                                                                                                                                                                                                                                                                                                                                                                                                                                                                                                                                                                                                                                                                                                                                                                                                                                                                                                                         |

|       |                    |                                                                                                                                                                                                                                                                                                                                                                                                                                                                                                                                                                                                                                                                                                                                                                                                                                                                                                                                                                                                                                                                                                                                                                                                                                                                                                                                                                                                                                   |
|-------|--------------------|-----------------------------------------------------------------------------------------------------------------------------------------------------------------------------------------------------------------------------------------------------------------------------------------------------------------------------------------------------------------------------------------------------------------------------------------------------------------------------------------------------------------------------------------------------------------------------------------------------------------------------------------------------------------------------------------------------------------------------------------------------------------------------------------------------------------------------------------------------------------------------------------------------------------------------------------------------------------------------------------------------------------------------------------------------------------------------------------------------------------------------------------------------------------------------------------------------------------------------------------------------------------------------------------------------------------------------------------------------------------------------------------------------------------------------------|
| MPG   | ENSOARGO(N-methyl) | miR-30b-3p, miR-296-5p, miR-2284r, miR-542-3p, miR-4508, miR-2889, miR-744-5p, miR-30b-3p, miR-187-3p, miR-2300a-5p, novel_4, miR-1343-3p, miR-9788-3p, miR-149-5p, miR-185-5p, miR-134-3p, miR-1298-3p, let-7g-5p, miR-3431, miR-2957, miR-342, miR-1306-5p, miR-125a-5p, let-7e, miR-491-5p, miR-3085-3p, let-7a-5p, miR-493-5p, miR-4532, miR-2285r, miR-1306, miR-216a-3p, miR-3591-3p, miR-2285ab, miR-18b, miR-9851-3p, miR-493-5p, miR-6395, miR-6516-3p, let-7e-5p, miR-1291, miR-499b-5p, miR-3064-5p, miR-4792, let-7d-5p, miR-669, miR-4443, miR-3596, miR-7857-3p, miR-378g, let-7i, miR-4324, miR-6123, miR-128-1-5p, miR-2285f, miR-17-3p, miR-342-3p, miR-423-5p, miR-2428, miR-361-3p, miR-24-3p, miR-188-3p, novel_133, miR-134, miR-1961, miR-193b-5p, miR-133a-3p, miR-128-3p, miR-378d, miR-885-3p, let-7d, miR-1224-5p, miR-18b-5p, miR-3960, miR-532-3p, miR-134-5p, miR-328-3p, miR-219b-5p, miR-125b, let-7c-5p, miR-185-3p, let-7k, miR-543-5p, novel_96, miR-17-3p, miR-450a-2-3p, miR-760-3p, miR-98-5p, let-7f-5p, miR-3064-5p, miR-4286, miR-486-3p, let-7g, miR-130a-5p, miR-18a, miR-885-3p, miR-1895, miR-485-5p, let-7g-3p, miR-2312, miR-18a-5p, miR-2355-5p, miR-21-3p, miR-296-3p, miR-125a, miR-324-5p, let-7i-5p, miR-154b-5p, miR-324-3p, miR-132-5p, miR-125b-5p, miR-6740-5p, let-7f, miR-4492, miR-486b-3p, miR-134-5p, miR-17-3p, let-7b, miR-3184-5p, let-7b-5p, miR-1197-3p, miR-346 |
| SESNI | ENSOARGO(sestrin)  | miR-1843a-3p, miR-133b-3p, miR-185-3p, miR-133a-3p, miR-1343-3p                                                                                                                                                                                                                                                                                                                                                                                                                                                                                                                                                                                                                                                                                                                                                                                                                                                                                                                                                                                                                                                                                                                                                                                                                                                                                                                                                                   |

miR-664a, miR-487a-5p, miR-500, miR-4492, miR-15b-3p, miR-30e-3p, miR-30a-3p, miR-338-5p, miR-320e, miR-6525, miR-346, miR-214, miR-30f, miR-582-5p, miR-186-5p, miR-21a-3p, miR-2285c, miR-500a-3p, miR-30d-5p, miR-377-3p, miR-582-5p, miR-216b-5p, miR-139-5p, miR-3065-3p, miR-532-5p, miR-320d, miR-2284m, miR-466i-5p, miR-30b, miR-26a-5p, miR-2411, miR-329a-5p, miR-195a-3p, miR-4429, miR-142-3p, miR-16-1-3p, miR-2284u, miR-30c-5p, miR-217-5p, miR-23b-3p, miR-23c, miR-30d-3p, miR-2284q, miR-30b-5p, miR-101-3p, miR-502-3p, miR-3059-5p, miR-2284j, novel\_94, miR-140-5p, miR-378j, miR-489, miR-500-3p, miR-139-5p, miR-2284g, miR-2319b, miR-499b-5p, miR-211-5p, miR-487b-5p, miR-214-3p, miR-320b, miR-326, miR-505, miR-1b-5p, miR-23a-3p, miR-2284b, miR-376b, miR-101a-5p, miR-21b, miR-16-2-3p, miR-101c, miR-501-3p, miR-30b-3p, miR-539-5p, miR-216a-3p, miR-421, miR-2285e, miR-548w, miR-145b, miR-767-5p, miR-410-3p, miR-204-5p, miR-2284k, miR-29b-3p, miR-1-5p, miR-2284v, miR-767, miR-329b, miR-376c-5p, miR-7144-5p, miR-190a-3p, miR-485-5p, miR-30e-5p, miR-2448-3p, miR-376c-5p, miR-320a, miR-23b, miR-2284n, miR-574-5p, miR-370-3p, miR-141-3p, miR-1a-2-5p, miR-543-5p, miR-200a-3p, miR-2285af, miR-6119-5p, miR-217, miR-380-5p, miR-2284y, miR-1957a, miR-29a-5p, miR-3065-3p, miR-2284a, miR-2285b, miR-192-3p, miR-3529-3p, miR-2385-3p, miR-30a-3p, miR-30c, miR-29d-3p, miR-2427, miR-30a-5p, miR-330-5p, miR-501-3p, miR-2411-5p, miR-423-3p, miR-7641, miR-29a, miR-147-5p, miR-6123, miR-4324, miR-6402, miR-576-3p, miR-142b, miR-211, miR-326-3p, miR-2428, miR-1a-1-5p, miR-29c-3p, miR-495-3p, miR-2319a, miR-376b-5p, miR-150-5p, miR-3065-5p, miR-29a-3p, miR-374c-3p, miR-320c, miR-329-5p, miR-26b-5p, miR-7-5p, miR-377-3p, novel\_51, miR-432-3p, miR-380-5p, miR-101-5p, miR-29b, miR-30b-3p, miR-16-1-3p, miR-219a-1-3p, miR-2284v, miR-7b-5p, miR-

miR-195a-5p, miR-21c, miR-216a-3p, miR-181b-3p, miR-677, miR-374c-3p, miR-299b-3p, miR-10a-5p, miR-3074-5p, miR-203b-5p, miR-421-5p, miR-16a, miR-576-3p, miR-15a, miR-502-5p, miR-2428, miR-371b-3p, miR-24-3p, miR-1193, miR-495-3p, miR-1839-3p, miR-27b-3p, miR-497-5p, miR-219a-1-3p, miR-16-1-3p, miR-1260b, miR-30b-3p, miR-16b, miR-21-5p, miR-2284ab, miR-145a-5p, miR-3071-5p, miR-450c-3p, miR-7b-5p, miR-1434-3p, miR-873a-5p, miR-19b-2-5p, miR-2355-3p, miR-503-5p, miR-3431, miR-185-5p, miR-660, miR-378a-5p, miR-483-3p, miR-296-3p, miR-7-5p, miR-503-5p, miR-296-3p, miR-654-3p, miR-668-3p, miR-329b, miR-324-5p, miR-769, miR-374c-3p, miR-574-5p, miR-486b-3p, novel\_9, miR-331-3p, miR-370-5p, miR-2284k, miR-1197-3p, miR-1260b, miR-16-5p, miR-6128, miR-193a-5p, miR-10a-5p, miR-128-3p, miR-214-5p, miR-450a-1-3p, miR-6516-5p, miR-483-3p, miR-322-5p, miR-1224-5p, miR-2285ad, miR-299a-3p, miR-543-5p, miR-127-5p, miR-2898, miR-1260a, miR-1271-3p, miR-490-3p, miR-2285b, miR-192-3p, miR-1957a, miR-3065-3p, miR-29b-2-5p, miR-381-3p, miR-27a-3p, miR-203-3p, miR-3082-5p, miR-25, miR-452-3p, miR-20a-3p, miR-2319b, miR-139-5p, miR-3964, miR-2285t, miR-3968, miR-2285y, miR-769-5p, miR-382-3p, miR-452-5p, miR-212-3p, miR-541-3p, miR-450b-5p, miR-30b-3p, miR-10b, miR-541, miR-9788-3p, miR-216a-3p, miR-455-3p, miR-142-3p, miR-27a-3p, miR-145b, miR-181b-2-3p, novel\_78, miR-151a-3p, miR-3955-3p, miR-16b, miR-29b-1-5p, novel\_103, novel\_115, miR-1839-3p, miR-424-5p, miR-2330-5p, miR-411, miR-129b-3p, miR-450a-1-3p, miR-21a-3p, miR-15b-5p, miR-151b, miR-139-5p, miR-10a, miR-6516, miR-552-3p, miR-3065-3p, miR-370-5p, miR-660-5p, miR-4492, miR-424-5p, novel\_74, miR-450b-3p, miR-320e, miR-29b-2-5p, miR-151-3p, miR-324-3p, miR-19b-1-5p, miR-346, miR-10b-5p, miR-769-5p, miR-3074-2-3p, miR-3074-5p, miR-16-1-3p, miR-140-3p, miR-

miR-848b, miR-23a-3p, miR-124a, miR-1388-3p, miR-101b-3p, miR-146b, miR-214-3p, miR-103a-2-5p, miR-491-5p, miR-130b-3p, miR-106b-5p, miR-182-5p, miR-431-5p, miR-421, miR-147a, miR-181b-2-3p, miR-548w, miR-199b-3p, miR-1388-5p, miR-758-3p, miR-877-3p, novel\_111, miR-2284j, miR-2447, miR-363-3p, miR-154-3p, miR-499a-5p, miR-101-3p, miR-615, miR-2440, miR-144-5p, miR-203-3p, miR-3596, miR-139-5p, miR-2319b, miR-335-3p, miR-544-5p, miR-1983, miR-96-5p, miR-668-5p, miR-378j, miR-221, miR-2424, miR-380-3p, miR-377-5p, miR-181b-1-3p, miR-142a-3p, miR-329a-5p, miR-487a, miR-92a-1-5p, miR-30b, miR-2285p, miR-210-3p, miR-7859, miR-23b-3p, miR-23c, miR-30d-3p, miR-106a, miR-34a-5p, miR-217-5p, miR-30c-5p, miR-6525, miR-214, miR-129-2-3p, miR-3184-3p, miR-129-5p, miR-454-3p, miR-130b-5p, miR-30a-3p, miR-219b-3p, miR-30e-3p, miR-377-3p, miR-301a-3p, miR-582-5p, miR-552-3p, miR-30c-1-3p, miR-32-5p, miR-548o-3p, miR-625-5p, miR-543-3p, miR-433-3p, miR-30d-5p, let-7a-2-3p, miR-503-3p, miR-432-3p, miR-2284l, miR-628-5p, miR-193a-3p, miR-32, miR-105-5p, miR-7-5p, miR-146a, miR-377-3p, novel\_116, miR-194-3p, miR-188-5p, miR-27b-3p, miR-223-3p, miR-7b-5p, miR-542-3p, miR-301b-3p, miR-2285m, miR-193b-3p, miR-29c-3p, miR-335-5p, miR-421-5p, miR-29a, miR-4324, miR-320c, miR-677, miR-181b-3p, novel\_68, miR-216b-3p, miR-329-5p, miR-146b-5p, miR-2319a, miR-412-3p, miR-3591-3p, miR-216a-3p, miR-3065-5p, miR-29a-5p, miR-2285b, miR-92b-3p, miR-3064-5p, miR-200a-3p, novel\_96, miR-6536, miR-30f, miR-219-3p, miR-129-1-3p, miR-18b-5p, miR-431, miR-2285ad, miR-30c, miR-2427, miR-23b-5p, miR-3591-5p, miR-144-5p, miR-2433, miR-300-3p, miR-25-3p, miR-2285aa, miR-3068-3p, miR-20b-5p, miR-767, miR-2318, miR-93-5p, miR-23b, miR-30e-5p, miR-424-3p, miR-4532, miR-758-3p, miR-30c-1-3p, miR-106a-5p, miR-382-3p, miR-3085-3p, miR-3055-3p, miR-320b, novel\_115, miR-221-3p, miR-30c-1-3p, miR-296-3p, miR-204-3p, miR-376c-5p, miR-320a, miR-10b-3p, miR-7144-5p, miR-376c-5p, miR-671-5p, miR-1827, miR-129-2-3p, miR-346, miR-365a-5p, miR-6134, miR-2433, miR-551b-3p, miR-331-3p, miR-320e, miR-664a-5p, miR-135a-5p, miR-138-5p, novel\_9, miR-487a-5p, miR-134-5p, miR-412, miR-196a-2-3p, miR-758-5p, miR-1247-5p, miR-134-5p, miR-545-5p, miR-129-1-3p, miR-134, miR-1193, miR-142-3p, miR-4429, miR-130a-5p, miR-376c-5p, miR-376b-5p, miR-490-3p, miR-1271-3p, miR-2285b, miR-143-3p, novel\_17, miR-30c-2-3p, miR-320d, miR-2898, miR-30b-3p, miR-4792, miR-2404, miR-25, miR-411b-3p, miR-2483-3p, miR-320c, miR-376b-5p, miR-3065-5p, miR-378b, miR-135b-5p, novel\_94, miR-2447, miR-342-3p, miR-495-3p, miR-154a, novel\_1, miR-147-5p, novel\_4, miR-330-3p, miR-5010-3p, miR-145b, miR-3535, miR-1298-3p, miR-147a, miR-411-5p, miR-1843b-5p, miR-4791, miR-223-3p, miR-197-3p, miR-412-3p, miR-145a-5p, miR-138, miR-3120-5p, miR-744-5p, miR-2284x, miR-6240, miR-363-5p, miR-376b, miR-30c-1-3p, miR-432-3p, miR-432-3p, miR-320b, miR-342, miR-330-3p, miR-365b-5p, miR-124-5p, miR-25-5p

novel\_60, miR-88b-5p, miR-3956-3p, miR-2284j, miR-194b-5p, miR-361-3p, miR-877-3p, miR-2285n, miR-2440, miR-301a-5p, miR-3968, miR-3964, miR-2284g, miR-3064-5p, miR-452-3p, miR-7977, miR-378g, miR-4443, miR-454-5p, miR-361-3p, miR-877-3p, miR-494-3p, miR-424-5p, miR-2284b, miR-652-5p, miR-33a-5p, miR-342, miR-326, novel\_103, miR-182-5p, miR-16b, miR-491-5p, miR-3085-3p, miR-214-3p, miR-330-3p, miR-105-1, miR-1343-3p, miR-181b-2-3p, miR-9788-3p, miR-148b-5p, miR-296-5p, miR-301b-5p, miR-10b, miR-412-3p, miR-1a-3p, miR-30b-3p, miR-544a, miR-450b-5p, miR-2284aa, miR-3120-5p, miR-4510, miR-145a-3p, miR-214, miR-6525, miR-10b-5p, miR-206-3p, miR-6134, miR-2285j, miR-665, miR-874-5p, miR-424-5p, miR-708-5p, miR-4492, miR-2331-3p, miR-221-5p, miR-532-5p, miR-182-5p, miR-544-3p, miR-10a, miR-323-5p, miR-193b-3p, miR-6130, miR-22-3p, miR-15b-5p, miR-339b, miR-345-5p, miR-1895, miR-1827, miR-376a-5p, miR-181b-1-3p, miR-486-3p, miR-210-5p, miR-324-3p, miR-345-3p, miR-125b, miR-99a-3p, miR-760-3p, miR-34b-5p, miR-221-5p, miR-21-3p, miR-18a-3p, miR-212-5p, miR-148b-3p, miR-15a-5p, miR-532-3p, miR-191, novel\_133, miR-2300b-3p, miR-2904, miR-188-3p, miR-1197-5p, miR-133a-3p, miR-2284u, miR-34a-5p, miR-148a-5p, miR-342-3p, miR-3957-3p, miR-193b-3p, miR-495-3p, miR-449a, miR-326-3p, miR-2428, miR-2284w, miR-15a, miR-16a, miR-34c, miR-128-1-5p, miR-206, miR-6123, miR-502b, miR-320b, miR-10a-5p, miR-146b-3p, miR-323a-5p, miR-2404, miR-34b, miR-677, miR-181b-3p, miR-148a-3p, miR-3141, miR-2387, miR-150-5p, miR-216a-3p, miR-18a-3p, miR-107, miR-195a-5p, miR-6240, miR-363-5p, miR-668-3p, miR-654-3p, let-7j, miR-345-5p, miR-3141, miR-330-3p, miR-365b-5p, miR-105-5p, miR-2411-3p, miR-194a, novel\_51, miR-483-3p, miR-452-5p, miR-1343-5p, miR-125a-5p, miR-193a-3p, miR-31-5p, miR-103a-3p, miR-330-5p, miR-

miR-363-5p, miR-668-3p, miR-628-5p, miR-6240, miR-660, miR-193a-3p, miR-124-5p, miR-378a-5p, miR-22851, miR-330-3p, novel\_51, miR-2411-3p, miR-377-3p, miR-149-5p, miR-134-3p, miR-665, miR-339-5p, miR-26b-3p, miR-31-5p, miR-187-3p, miR-4508, miR-7862, miR-138, miR-30b-3p, miR-29b, miR-1260b, miR-16-1-3p, miR-450c-3p, miR-873a-5p, miR-2113, miR-326-3p, miR-199b-5p, miR-2428, miR-24-3p, miR-193b-3p, miR-495-3p, miR-29c-3p, miR-135a-2-3p, miR-6123, miR-128-1-5p, miR-29a, novel\_1, miR-677, miR-181b-3p, miR-299b-3p, miR-29a-3p, miR-10a-5p, miR-3074-5p, miR-7975, miR-2319a, miR-1291, miR-18a-3p, miR-2387, novel\_39, miR-199a-5p, miR-490-3p, miR-1271-3p, miR-2285b, miR-380-5p, miR-148b-5p, miR-24-2-5p, miR-3064-5p, miR-2403, miR-4286, novel\_127, miR-543-5p, novel\_96, miR-200a-3p, miR-2898, miR-127-5p, miR-191-3p, miR-30c-2-3p, miR-339a, miR-1260a, miR-545-5p, miR-450a-1-3p, miR-486-5p, miR-129-1-3p, novel\_79, miR-1224-5p, miR-412, miR-299a-3p, miR-10a-5p, miR-29d-3p, miR-501-3p, miR-330-5p, miR-345-3p, miR-3591-5p, miR-3578, miR-145-3p, miR-2903, miR-500b-5p, miR-1260b, miR-592, miR-486b-3p, miR-138-5p, novel\_9, miR-331-3p, miR-409-3p, miR-3969, miR-29b-3p, miR-99b-3p, miR-199a-5p, miR-324-5p, miR-133c, miR-374c-3p, miR-769, miR-3959-5p, miR-2355-5p, miR-99a-3p, miR-141-3p, miR-1271, miR-615-5p, miR-7144-5p, miR-671-5p, miR-485-5p, miR-1248, miR-329b, miR-362-5p, miR-2448-3p, miR-4532, miR-193a, miR-30c-1-3p, miR-23a-3p, miR-744-3p, miR-199b-5p, miR-214-3p, miR-2285o, miR-103a-2-5p, miR-3085-3p, miR-491-5p, miR-326, miR-455-3p, miR-500-5p, miR-148b-5p, miR-425-3p, miR-147a, miR-222-5p, miR-330-3p, miR-2300a-5p, miR-1343-3p, miR-151a-3p, miR-3120-5p, miR-1388-5p, miR-2426, miR-412-3p, miR-501-3p, miR-30b-3p, miR-6529a, miR-541, miR-10b, miR-502-3p, miR-362-5p, miR-361-3p, miR-2447, novel\_60, miR-3956-

miR-29b-2-5p, miR-199a-5p, miR-200a, novel\_39, miR-29a-5p, miR-148b-5p, miR-24-2-5p, miR-30c-2-3p, miR-205-5p, miR-107, miR-200a-3p, miR-450a-2-3p, miR-222, miR-545-5p, miR-450a-1-3p, miR-24-2-5p, miR-9-5p, miR-505-5p, miR-6516-5p, miR-1271-5p, miR-155-5p, let-7a-2-3p, miR-10a-5p, miR-411-3p, miR-6128, miR-144-5p, miR-1306-5p, miR-500b-5p, miR-6740-5p, miR-331-3p, miR-2332, miR-204-5p, miR-486b-3p, miR-138-5p, miR-331-5p, miR-598-3p, miR-370-3p, miR-141-3p, miR-503-3p, miR-199a-5p, miR-133c, miR-154b-5p, miR-300-3p, miR-320a, miR-362-5p, miR-503-3p, miR-331-5p, miR-424-3p, miR-190a-3p, miR-485-5p, miR-1814c, miR-10b-3p, miR-329a, let-7g-3p, miR-2483-5p, miR-668-3p, let-7j, let-7a-2-3p, miR-503-3p, miR-432-3p, miR-432-3p, miR-22841, miR-103a-3p, miR-149-5p, miR-194-3p, miR-103, miR-3535, miR-450c-3p, miR-197-3p, miR-181a-5p, miR-1843b-5p, miR-2889, miR-30b-3p, miR-138, miR-2285x, novel\_27, miR-199b-5p, miR-2284w, miR-211, miR-24-3p, miR-382-5p, miR-33a-3p, miR-502-5p, miR-576-3p, miR-147-5p, miR-10a-5p, miR-3120-3p, miR-320c, miR-146b-3p, miR-3970, miR-376a-2-5p, miR-107, miR-412-3p, miR-369-3p, miR-486-3p, miR-29b-1-5p, miR-500a-5p, novel\_17, miR-320d, miR-3600, miR-616-3p, miR-2904, miR-1434-5p, miR-362-3p, miR-4429, miR-142-3p, miR-1271, miR-214, miR-3074-2-3p, miR-10b-5p, miR-6525, miR-655-3p, miR-29b-2-5p, miR-222-3p, miR-487a-5p, miR-450b-3p, miR-664a, miR-155-5p, miR-216b-3p, miR-30c-1-3p, miR-155-5p, miR-6516, miR-10a, miR-598-3p, miR-655, miR-450a-1-3p, novel\_99, miR-376b, miR-1388-3p, miR-8485, miR-2310, miR-30c-1-3p, miR-29b-1-5p, miR-362-3p, miR-320b, miR-199b-5p, miR-214-3p, miR-3955-3p, miR-5010-3p, miR-500-5p, miR-221-3p, miR-7857, miR-30b-3p, miR-329-3p, miR-484, miR-10b, miR-4791, miR-21b, miR-362-3p, miR-2426, miR-450b-5p, miR-9-5p, miR-219a-5p, miR-181d-5p, miR-305a-5p, miR-8095, miR-576-3p, miR-6740-5p, miR-320e, novel\_42, miR-3607-3p, miR-3184-5p, miR-423-5p, miR-2428, miR-301, miR-3154, miR-18a-3p, miR-320a, miR-7144-5p, miR-23a-5p, miR-625-5p, miR-1248, miR-874-3p, miR-378g, miR-320c, miR-320b, miR-378a-5p, miR-320d, novel\_127, miR-4286, miR-490-3p, miR-2284r, miR-432, miR-5703, miR-4429, miR-18a-3p, miR-432-5p, miR-1298-3p, miR-134-3p, miR-9788-3p, miR-1247-5p



miR-183-5p, miR-329a-5p, miR-216c-5p, miR-503-5p, miR-487a, miR-146a-5p, miR-664b-3p, miR-376a-5p, miR-29b-1-5p, miR-181b-1-3p, miR-618, novel\_17, miR-2484, miR-485-3p, miR-18a-3p, novel\_83, miR-2284h-5p, miR-199a-3p, miR-487a-3p, miR-7859, miR-23b-3p, miR-210-3p, miR-200b, miR-23c, miR-2904, miR-124-3p, miR-140-3p, miR-1246, miR-362-3p, miR-16-1-3p, miR-361-5p, miR-493-3p, miR-33b-3p, miR-214, miR-433-5p, miR-10b-5p, miR-6525, miR-206-3p, miR-324-3p, miR-665, miR-208b-5p, miR-500, miR-130b-5p, miR-450b-3p, novel\_74, miR-6516-3p, miR-664a, miR-487b-5p, miR-21-3p, miR-154a-3p, miR-3065-3p, miR-182-5p, miR-504-5p, miR-140-5p, miR-548o-3p, miR-204-3p, miR-10a, miR-582-5p, miR-139-5p, miR-193b-3p, miR-129b-3p, miR-500a-3p, miR-433-3p, miR-543-3p, miR-625-5p, miR-186-5p, miR-582-5p, let-7g-3p, miR-339b, miR-345-5p, miR-23a-3p, miR-33a-5p, miR-124a, miR-101b-3p, miR-2330-5p, miR-4532, miR-1b-5p, miR-362-3p, miR-505, miR-29b-1-5p, miR-182-5p, miR-342, miR-199a-3p, miR-146b, miR-153-3p, miR-214-3p, miR-491-5p, miR-181b-2-3p, miR-199b-3p, miR-105-1, miR-330-3p, miR-2300a-5p, miR-421, miR-153, miR-7857, miR-30b-3p, miR-329-3p, miR-2284r, miR-484, miR-10b, miR-301b-5p, miR-101c, miR-362-3p, miR-3059-5p, miR-2447, miR-212-3p, miR-9-3p, miR-8095, miR-877-3p, novel\_111, miR-1973, miR-371a-5p, miR-301a-5p, novel\_82, miR-218-5p, miR-101-3p, miR-490-5p, miR-154-3p, miR-2284q, miR-499b-5p, miR-541-5p, miR-211-5p, miR-664b, miR-139-5p, miR-10b, miR-452-3p, miR-2319b, miR-144-5p, miR-7857-3p, miR-3082-5p, miR-489, miR-2483-3p, miR-378j, miR-381-3p, miR-129b-5p, miR-493-5p, miR-9-3p, miR-136-5p, miR-668-5p, miR-504, miR-3529-3p, miR-200a, miR-29a-5p, miR-3065-3p, miR-450b-5p, miR-2478, miR-3071-3p, miR-339a, miR-2285af, miR-205-5p, miR-2397-5p, miR-664-3p, miR-200c, miR-200a-3p, novel\_96, novel\_127, miR-200c-

MAGI1      ENSOARGO(membrane

miR-412-3p, miR-7857, miR-758-3p, miR-30b-3p, miR-6529a, miR-296-5p, miR-1388-5p, miR-544a, miR-27a-3p, miR-181b-2-3p, novel\_4, miR-548w, miR-1343-3p, miR-2300a-5p, miR-409b, miR-330-3p, miR-455-3p, miR-1185-3p, novel\_19, miR-505, miR-182-5p, miR-342, miR-431-5p, miR-146b, miR-3085-3p, miR-491-5p, miR-1185-5p, miR-3955-3p, miR-1388-3p, miR-382-3p, miR-8485, miR-4532, miR-193a, miR-1b-5p, miR-758-3p, miR-2310, miR-378j, miR-129b-5p, miR-493-5p, miR-9-3p, miR-299b-5p, miR-668-5p, miR-3064-5p, miR-2319b, miR-452-3p, miR-20a-3p, miR-27a-3p, miR-1185-2-3p, miR-769-5p, miR-1973, miR-2285y, novel\_82, miR-101-3p, miR-9-5p, miR-3059-5p, novel\_60, miR-3956-3p, miR-212-3p, miR-361-3p, miR-1434-5p, miR-217-5p, miR-140-3p, miR-5703, miR-1193, miR-376a-5p, miR-218-1-3p, miR-378d, miR-19b-3p, miR-212-5p, miR-485-3p, miR-18a-3p, novel\_83, miR-487a-3p, miR-95-3p, miR-345-3p, miR-125b, miR-210-5p, novel\_17, miR-2285p, miR-1277-5p, miR-21-3p, miR-760-3p, miR-345-3p, miR-2432, miR-146a-5p, miR-376a-5p, miR-181b-1-3p, miR-130a-5p, miR-125b-2-3p, miR-21a-3p, miR-450a-1-3p, miR-625-5p, miR-1827, let-7g-3p, miR-339b, miR-345-5p, miR-3065-3p, miR-21-3p, miR-216b-3p, miR-182-5p, miR-496-3p, miR-22-3p, novel\_25, miR-155-5p, miR-544-3p, miR-377-3p, miR-323-5p, miR-6130, miR-19b-1-5p, miR-665, miR-708-5p, miR-450b-3p, miR-155-5p, miR-664a, miR-129-2-3p, miR-145a-3p, miR-3184-3p, miR-4510, miR-338-3p, miR-6525, miR-769-5p, miR-22-3p, miR-450c-3p, miR-197-3p, miR-432, miR-19b-2-5p, miR-1434-3p, miR-223-3p, miR-2284x, miR-27b-3p, miR-455-5p, miR-138, miR-29b, miR-30b-3p, miR-219a-1-3p, miR-339-5p, miR-3955-5p, miR-103a-3p, novel\_116, miR-544b, miR-103, miR-432-5p, miR-185-5p, miR-330-3p, miR-365b-5p, miR-197-5p, novel\_51, miR-2411-3p, miR-155-5p, miR-377-3p, miR-296-3p, miR-146a, miR-106b-3p, miR-199b-5p, miR-665, miR-381-3p, miR-374b-3p, miR-324-3p, let-7f-1-3p, miR-199b-5p, miR-199b-5p, miR-9788-3p, miR-199a-5p, miR-199a-5p, miR-20a-3p, miR-212-3p

FOXO3

ENSOARGO(forkhead

UHMK1

ENSOARGO(U2AF hom

miR-29b, miR-380-3p, miR-26a-2-3p, miR-744-5p, miR-873a-5p, miR-653, miR-1843b-5p, miR-1434-3p, miR-3535, miR-2285g, let-7g-5p, miR-185-5p, miR-6238, miR-187-3p, miR-31-5p, miR-483-3p, miR-378a-5p, miR-660, miR-452-5p, miR-224-5p, miR-296-3p, miR-330-3p, miR-365b-5p, miR-432-3p, miR-296-3p, let-7a-2-3p, miR-130b-5p, miR-6240, miR-2483-5p, miR-19a-3p, miR-412-3p, miR-2319a, miR-6395, miR-376a-2-5p, miR-135b-5p, let-7e-5p, miR-18a-3p, miR-3065-5p, miR-323a-5p, miR-670-3p, miR-299b-3p, miR-29a-3p, miR-3074-5p, miR-3120-3p, miR-206, miR-29a, miR-502b, miR-6402, let-7i, miR-3959-3p, miR-219b-3p, miR-29c-3p, miR-17-3p, miR-1193, miR-2285x, let-7d, miR-582-3p, let-7a-2-3p, miR-3591-5p, miR-29d-3p, miR-483-3p, miR-582-3p, miR-545-5p, miR-129-1-3p, miR-299a-3p, miR-7641, miR-1224-5p, miR-412, miR-376a-5p, miR-17-3p, let-7f-5p, miR-543-5p, miR-200a-3p, novel\_127, miR-205-5p, miR-664-3p, miR-219-3p, miR-181c-3p, let-7c-5p, miR-450b-5p, let-7g, miR-3956-5p, miR-1, miR-3064-5p, miR-4286, miR-10b-3p, miR-7144-5p, miR-3074-1-3p, miR-1814c, miR-671-5p, miR-365a-3p, miR-223-5p, miR-133c, miR-2355-5p, miR-141-3p, miR-29b-3p, miR-5100, miR-370-5p, miR-135a-5p, miR-145-3p, miR-365a-5p, miR-1388-5p, miR-1839-5p, miR-101c, miR-6529a, miR-4791, miR-1298-5p, miR-412-3p, miR-1a-3p, miR-3962, miR-142-3p, miR-9788-3p, miR-2285e, novel\_4, miR-330-3p, miR-1343-3p, miR-3085-3p, miR-103a-2-5p, let-7e, miR-29b-1-5p, miR-2310, let-7a-5p, miR-652-5p, miR-376b, miR-744-3p, miR-1983, novel\_94, miR-877-3p, miR-361-3p, miR-129b-5p, miR-7857-3p, miR-2483-3p, let-7d-5p, miR-4443, miR-664b, miR-3064-5p, miR-541-5p, miR-4726-5p, miR-490-5p, miR-2440, miR-107-5p, miR-423-5p, miR-8095, miR-219a-2-3p, miR-2447, miR-3059-5p, miR-452-5p, miR-19b-3p, novel\_133, miR-2300b-3p, miR-2366, miR-1961, miR-1193, miR-1197-5p, miR-222-5p, miR-328-

miR-1197-3p, miR-1260b, miR-93, miR-1306-5p, miR-133a-3p, miR-103b, miR-193a-5p, miR-3607-3p, miR-138-5p, miR-134-5p, novel\_63, miR-331-3p, miR-6740-5p, miR-34c-5p, miR-199a-5p, miR-574-5p, miR-141-3p, miR-215-5p, miR-2285aa, miR-2355-5p, let-7g-3p, miR-345-5p, miR-329a, miR-671-5p, miR-485-5p, miR-1248, miR-7144-5p, miR-20b-5p, miR-424-3p, miR-17-5p, miR-362-5p, miR-320a, miR-3154, miR-93-5p, miR-1271-3p, miR-2285b, novel\_39, miR-29a-5p, miR-199a-5p, miR-181a-2-3p, miR-3064-5p, miR-200c-3p, miR-200a-3p, miR-200c, miR-1260a, novel\_121, miR-129-1-3p, miR-545-5p, miR-134-5p, miR-450a-1-3p, miR-429-3p, miR-1224-5p, miR-582-3p, miR-885-3p, miR-10a-5p, miR-200b-3p, miR-1290, miR-134, miR-330-5p, miR-218-2-3p, miR-1343-5p, miR-199b-5p, miR-326-3p, miR-449a, novel\_1, miR-656-5p, miR-20a-5p, miR-142b, miR-576-3p, miR-33a-3p, miR-34c, miR-34b, miR-181b-3p, miR-677, miR-320c, miR-6535, miR-216b-3p, miR-363, miR-10a-5p, miR-320b, miR-412-3p, miR-450b-3p, miR-379-5p, miR-3065-5p, miR-150-5p, miR-2285r, miR-345-5p, miR-1343-5p, miR-106a-5p, miR-17-5p, miR-197-5p, miR-432-5p, miR-20b, miR-31-5p, miR-1260b, miR-138, miR-2113, miR-1843b-5p, miR-432, miR-873a-5p, miR-450c-3p, miR-197-3p, miR-10b-5p, miR-129-2-3p, miR-4510, miR-425-5p, miR-665-5p, miR-450b-3p, miR-208b-5p, miR-487a-5p, miR-129-5p, miR-2285j, miR-6130, miR-192-5p, miR-10a, miR-204-3p, miR-32-3p, miR-548o-3p, miR-182-5p, miR-296-3p, miR-345-5p, miR-133b-3p, miR-1827, miR-885-3p, miR-450a-1-3p, miR-125b-2-3p, miR-181b-1-3p, miR-29b-1-5p, miR-20a, miR-466i-5p, miR-106a, miR-320d, miR-34b-5p, miR-374a-5p, miR-185-3p, miR-122-3p, miR-500a-5p, miR-324-3p, miR-200b, miR-7859, miR-106a, miR-548e-3p, miR-212-5p, miR-4429, novel\_73, miR-142-3p, miR-33b-3p, miR-34a-5p, miR-215-5p, miR-362-3p, miR-2408, novel\_133, miR-2904, miR-362-5p, miR-

MRVI1 ENSOARGO(murine r

miR-45b-3p, miR-181b-2-3p, miR-330-3p, novel\_78, miR-1343-3p, miR-1388-5p, miR-362-3p, miR-329-3p, miR-8485, miR-378d, miR-744-3p, miR-1388-3p, miR-214-3p, miR-381-5p, miR-103a-2-5p, miR-146b, miR-199b-5p, miR-130b-3p, miR-491-5p, miR-16b, miR-29b-1-5p, miR-431-5p, miR-4443, miR-144-5p, miR-378g, miR-3596, miR-2285u, miR-2319b, miR-1983, miR-378j, miR-423-5p, miR-1285-5p, novel\_111, miR-361-3p, miR-3956-3p, miR-2447, novel\_82, miR-210-3p, miR-212-5p, miR-18a-3p, miR-16-1-3p, miR-218-1-3p, miR-378a-3p, miR-193b-5p, miR-378i, miR-486-3p, miR-181b-1-3p, miR-376c-3p, miR-376a-5p, miR-345-3p, miR-92a-1-5p, miR-345-3p, miR-422a, miR-500a-5p, miR-324-3p, novel\_17, miR-15b-5p, miR-301a-3p, miR-376e-3p, miR-377-3p, miR-552-3p, miR-296-3p, miR-30c-1-3p, miR-1827, miR-625-5p, miR-345-5p, miR-500a-3p, miR-2285c, miR-3184-5p, miR-224-5p, miR-769-5p, miR-214, miR-3074-5p, miR-874-5p, miR-500, miR-4492, miR-454-3p, miR-194-3p, novel\_116, miR-134-3p, miR-412-5p, miR-103a-3p, miR-3955-5p, miR-31-5p, miR-27b-3p, miR-497-5p, miR-381-5p, miR-16-1-3p, miR-16b, miR-432, miR-2285r, miR-6240, miR-193a-3p, miR-378a-5p, miR-2411-3p, novel\_51, miR-296-3p, miR-377-3p, miR-146a, miR-181b-3p, miR-677, miR-6535, novel\_69, miR-329-5p, miR-216b-3p, miR-3074-5p, novel\_68, miR-378f, miR-146b-5p, miR-412-3p, miR-216a-3p, miR-3970, miR-1306, miR-148a-3p, miR-199b-5p, miR-2284w, miR-301b-3p, miR-193b-3p, miR-335-5p, miR-28c, miR-4324, miR-134-5p, miR-322-5p, miR-431, miR-412, miR-2285ad, miR-330-5p, miR-1343-5p, miR-192-3p, miR-450c-5p, miR-29a-5p, novel\_39, miR-3064-5p, novel\_96, novel\_127, miR-152-3p, miR-127-5p, miR-376c-3p, miR-1271, miR-542-5p, miR-2355-5p, miR-874-3p, miR-329a, miR-345-5p, miR-1260b, miR-1197-3p, miR-144-5p, miR-16-5p, miR-502, miR-134-5p, miR-2433, miR-2285a, miR-216a-3p, miR-

miR-49b-3p, miR-301b-3p, miR-62b-3p, miR-22-5p, miR-65b-5p, miR-3120-3p, miR-26b-5p, miR-2404, miR-320c, miR-677, miR-181b-3p, miR-376b-5p, miR-2285ab, miR-148a-3p, miR-3591-3p, miR-18a-3p, miR-1291, miR-135b-5p, miR-432-3p, let-7j, miR-539-3p, miR-2411-3p, miR-483-3p, miR-31-5p, miR-665, miR-432-5p, miR-2284d, miR-2285g, miR-432, miR-1434-3p, miR-1843b-5p, miR-181a-5p, novel\_23, miR-30b-3p, miR-219a-1-3p, miR-2284v, novel\_63, miR-2284k, miR-34c-3p, miR-3969, miR-135a-5p, miR-331-5p, miR-486b-3p, miR-28-5p, miR-574-5p, miR-874-3p, miR-141-3p, miR-331-5p, miR-365a-3p, miR-376c-3p, miR-331-5p, miR-376c-5p, miR-320a, miR-3154, miR-10b-3p, miR-329a, miR-2318, miR-376c-5p, miR-30a-3p, miR-181a-2-3p, miR-24-2-5p, miR-376b-5p, miR-200a, novel\_39, miR-376c-5p, miR-2284y, miR-2284a, miR-127-5p, miR-181b-5p, miR-200a-3p, novel\_127, miR-152-3p, miR-2285ad, miR-302a-5p, miR-483-3p, miR-345-3p, miR-582-3p, miR-155-5p, miR-2285f, miR-181d-5p, miR-2284j, miR-9-3p, miR-154a, miR-2285n, miR-2285y, miR-490-5p, miR-2284g, miR-24-1-5p, miR-7977, miR-25, miR-203-3p, miR-335-3p, miR-9-3p, let-7c-3p, miR-652-5p, miR-2284b, miR-2310, miR-320b, novel\_115, miR-323b-3p, miR-362-3p, miR-130b-3p, miR-3955-3p, miR-181b-2-3p, miR-142-3p, miR-1298-3p, miR-455-3p, miR-9788-3p, miR-148b-5p, miR-216a-3p, miR-2285e, miR-126a-5p, miR-329-3p, miR-323b, miR-125b-2-3p, miR-30b-3p, miR-362-3p, miR-101c, miR-122-5p, miR-181c-5p, miR-30e-3p, miR-30a-3p, miR-155-5p, miR-454-3p, miR-708-5p, miR-548o-3p, miR-21-3p, miR-301a-3p, miR-376e-3p, miR-582-5p, miR-656-3p, miR-155-5p, miR-21a-3p, miR-2285c, miR-2312, miR-582-5p, miR-183-5p, miR-376a-5p, miR-181b-1-3p, miR-376c-3p, miR-142a-3p, miR-486-3p, miR-618, miR-345-3p, miR-320d, miR-18a-3p, miR-3600, miR-485-3p, miR-30d-3p, miR-487a-3p, miR-148b-3p, miR-22c, miR-340-5p, miR-532-3p, miR-362-3p, miR-1388-3p, miR-541-3p, miR-769-5p, miR-769, novel\_39, miR-4443, miR-541, miR-769-5p, miR-671-5p

WDR78 ENSOARGO(WD repea

MIF4GD ENSOARGO(MIF4G do

miR-30f, novel\_99, miR-582-5p, miR-625-5p, miR-450a-1-3p, miR-2285c, miR-21a-3p, miR-30d-5p, miR-129b-3p, miR-216b-5p, miR-6130, miR-582-5p, miR-377-3p, miR-192-5p, miR-15b-5p, novel\_32, miR-548o-3p, miR-504-5p, miR-532-5p, miR-552-3p, miR-664a, miR-6516-3p, miR-17-3p, miR-450b-3p, miR-130b-5p, miR-424-5p, miR-2285j, miR-665, miR-224-5p, miR-181c-5p, miR-4510, miR-3074-5p, miR-3074-2-3p, miR-34a-5p, miR-148a-5p, miR-133a-3p, miR-362-3p, miR-215-5p, miR-376a-5p, miR-30c-5p, miR-140-3p, miR-124-3p, miR-15a-5p, miR-200b, miR-23c, miR-23b-3p, miR-2284h-5p, miR-466i-5p, miR-760-3p, miR-299-3p, miR-21-3p, miR-34b-5p, miR-30d, miR-210-5p, novel\_17, miR-618, miR-30b, miR-216a-5p, miR-130a-5p, miR-421-5p, miR-143-3p, miR-2285w, miR-503-5p, miR-329a-5p, miR-504, novel\_94, miR-203-3p, miR-2319b, miR-30b-5p, miR-1285-5p, miR-541-3p, miR-3059-5p, miR-181d-5p, miR-9-5p, miR-362-3p, miR-541, miR-329-3p, miR-30b-3p, miR-7857, miR-147a, miR-2285e, miR-148b-5p, novel\_4, miR-199b-3p, miR-222-5p, miR-3955-3p, miR-1185-5p, miR-326, miR-1306-5p, miR-16b, miR-362-3p, miR-8485, miR-424-5p, miR-124a, miR-744-3p, let-7g-3p, miR-329a, miR-1248, miR-485-5p, miR-30e-5p, miR-365a-3p, miR-34c-5p, miR-324-5p, miR-574-5p, miR-141-3p, miR-215-5p, miR-409-3p, miR-100-3p, miR-331-3p, miR-145-3p, miR-6128, miR-16-5p, miR-3607-3p, let-7a-2-3p, miR-200b-3p, miR-30c, miR-128-3p, miR-3578, miR-30a-5p, miR-330-5p, miR-2427, miR-322-5p, miR-9-5p, miR-6517, miR-429-3p, miR-299a-3p, miR-376a-5p, miR-181b-5p, miR-200c-3p, miR-17-3p, miR-200a-3p, miR-107, miR-200c, miR-3071-3p, miR-28b, miR-148b-5p, miR-376b-5p, miR-376c-5p, miR-3529-3p, miR-181a-2-3p, miR-107, miR-450b-3p, miR-6516-3p, miR-195a-5p, miR-376a-2-5p, miR-2319a, miR-3065-5p, miR-216a-3p, miR-378b, miR-1306, miR-299b-3p, miR-34b, miR-329a-5p, miR-3074-5p, novel\_68, miR-199c, miR-1434-5p, miR-107-5p, miR-103a-2-5p, miR-20b-5p, miR-133b-3p, miR-93-5p, miR-17-5p, let-7i-5p, miR-323-5p, miR-141-3p, miR-3068-3p, miR-30a-3p, miR-3969, let-7f, miR-30e-3p, let-7b-5p, miR-93, miR-374a-3p, miR-665-5p, miR-133a-3p, let-7b, miR-133a-3p, miR-200b-3p, miR-361-5p, let-7d, miR-1197-5p, miR-1961, miR-200b, miR-30d-3p, miR-429-3p, miR-106a, let-7k, miR-106a, let-7f-5p, miR-200c-3p, miR-466i-5p, miR-98-5p, miR-324-3p, let-7c-5p, miR-200c, miR-2432, miR-200a, miR-146a-5p, let-7g, miR-30a-3p, miR-20a, miR-105-3p, miR-146b-5p, let-7e-5p, miR-1306, let-7d-5p, miR-27a-3p, miR-323a-5p, miR-452-3p, miR-374a-3p, miR-203b-5p, novel\_1, miR-33a-3p, let-7i, miR-20a-5p, novel\_27, miR-1839-5p, miR-27b-3p, miR-2284x, miR-484, miR-20b, miR-412-5p, let-7g-5p, miR-27a-3p, miR-146b, let-7e, miR-505, novel\_51, miR-17-5p, miR-106b-5p, miR-106a-5p, miR-146a, miR-1306-5p, let-7a-5p, miR-382-3p, miR-106a-5p

DVL2

ENSOARGO(dishével

miR-23a-3p, miR-424-5p, miR-127-3p, miR-214-3p, miR-125a-5p, miR-16b, miR-455-5p, novel\_51, miR-323b-3p, novel\_19, miR-224-5p, miR-1185-3p, miR-2459, miR-216a-3p, miR-27a-3p, miR-122-3p, miR-744-5p, miR-455-5p, miR-27b-3p, miR-497-5p, miR-1260b, miR-29b, miR-138, miR-16b, miR-323b, miR-542-3p, miR-2284r, miR-2428, miR-9-3p, miR-8095, miR-361-3p, miR-17-3p, miR-29c-3p, miR-1193, miR-1296-5p, miR-4454, miR-29a, novel\_1, miR-16a, miR-769-5p, miR-576-3p, miR-28c, miR-15a, miR-27a-3p, miR-1185-2-3p, miR-29a-3p, miR-541-5p, miR-216b-3p, miR-3074-5p, miR-9-3p, novel\_94, miR-195a-5p, miR-1291, miR-216a-3p, miR-150-5p, miR-361-3p, miR-1271-3p, miR-2411, miR-125b-2-3p, miR-28b, miR-29b-2-5p, miR-2385-3p, miR-200a-3p, miR-21-3p, miR-221-5p, miR-17-3p, miR-2898, miR-125b, miR-185-3p, miR-125a-3p, miR-196a-3p, miR-1260a, miR-2284h-5p, miR-532-3p, miR-2411-5p, miR-15a-5p, miR-23b-3p, miR-322-5p, miR-505-5p, miR-218-1-3p, miR-128-3p, miR-29d-3p, miR-2300b-3p, miR-2366, miR-3591-5p, miR-338-3p, miR-1260b, miR-224-5p, miR-769-5p, miR-214, miR-16-5p, miR-3074-5p, miR-4510, miR-28-5p, miR-424-5p, miR-874-5p, miR-708-5p, miR-4492, miR-17-3p, miR-138-5p, miR-29b-2-5p, miR-665, miR-125b-5p, miR-370-5p, miR-29b-3p, miR-15b-5p, miR-769, miR-6130, miR-2284s, miR-1271, miR-125a, miR-141-3p, miR-552-3p, miR-2355-5p, miR-370-5p, miR-221-5p, miR-1827, miR-7144-5p, miR-876-3p, miR-23b, miR-129b-3p, miR-301



miR-125b-5p, miR-331-3p, miR-6740-5p, miR-29b-3p, miR-28-5p, miR-486b-3p, miR-138-5p, miR-93, miR-93-5p, miR-17-5p, miR-20b-5p, miR-485-5p, miR-671-5p, miR-370-3p, miR-615-5p, miR-125a, miR-874-3p, miR-199a-5p, miR-154b-5p, miR-34c-5p, novel\_127, novel\_96, miR-4286, miR-199a-5p, miR-3065-3p, miR-1271-3p, miR-29d-3p, miR-1343-5p, miR-330-5p, miR-501-3p, miR-885-3p, miR-196a-2-3p, miR-431, miR-6517, miR-485-3p, miR-34c, miR-20a-5p, miR-656-5p, miR-128-1-5p, novel\_1, miR-29a, miR-29c-3p, miR-326-3p, miR-449a, miR-301b-3p, miR-2428, miR-199b-5p, miR-24-3p, miR-1306, miR-18a-3p, miR-21c, miR-3591-3p, miR-2387, miR-3141, miR-6395, miR-1291, miR-19a-3p, miR-329-5p, miR-6535, novel\_69, miR-374c-3p, miR-34b, miR-29a-3p, miR-3141, novel\_51, miR-106a-5p, miR-17-5p, miR-1343-5p, miR-125a-5p, miR-378a-5p, miR-363-5p, miR-628-5p, miR-130b-5p, miR-374b-3p, miR-708-3p, miR-542-3p, miR-ARHGAP35 ENSOARGO(Rho GTPa 138, miR-29b, miR-21-5p, miR-130a-3p, miR-26b-3p, miR-194-3p, miR-20b, miR-134-3p, miR-665, miR-3604, miR-454-3p, miR-708-5p, miR-4492, miR-130b-5p, miR-664a, miR-214, miR-3184-5p, miR-6134, miR-129b-3p, miR-885-3p, miR-625-5p, let-7g-3p, miR-21-3p, miR-3065-3p, miR-552-3p, miR-2331-3p, miR-301a-3p, miR-3601, miR-125b, miR-185-3p, miR-34b-5p, miR-106a, miR-760-3p, miR-20a, miR-329a-5p, miR-486-3p, miR-5703, miR-140-3p, novel\_133, miR-34a-5p, miR-378d, miR-19b-3p, miR-18a-3p, miR-3960, miR-106a, miR-1247-5p, miR-328-3p, miR-107-5p, novel\_82, miR-2440, novel\_60, miR-3956-3p, miR-502-3p, miR-423-5p, miR-361-3p, miR-361-3p, miR-199b-5p, miR-136-5p, miR-4792, miR-500-3p, miR-378g, novel\_19, miR-106b-5p, miR-1306-5p, miR-431-5p, miR-5126, miR-326, miR-199b-5p, miR-103a-2-5p, miR-214-3p, miR-491-5p, miR-130b-3p, let-7c-3p, miR-1388-3p, miR-106a-5p, miR-501-3p, miR-484, miR-2284r, miR-296-5p, miR-1388-5p, miR-9788-3p

miR-653b, miR-320c, miR-677, miR-181b-3p, miR-2404, miR-29a-3p, miR-299b-3p, miR-655-5p, miR-320b, miR-10a-5p, miR-135b-5p, miR-195a-5p, miR-6516-3p, miR-21c, miR-3065-5p, miR-2387, miR-326-3p, miR-374c-5p, miR-199b-5p, miR-2428, miR-211, miR-371b-3p, miR-193b-3p, miR-17-3p, miR-29c-3p, miR-2285x, miR-29a, miR-206, miR-16a, miR-15a, miR-142b, miR-28c, miR-576-3p, miR-20a-5p, miR-544b, miR-20b, miR-3535, miR-665, miR-377-5p, miR-31-5p, miR-4508, miR-497-5p, miR-29b, miR-21-5p, miR-16b, miR-219a-1-3p, miR-3071-5p, miR-653, miR-345-5p, miR-2285r, miR-654-3p, miR-432-3p, miR-432-3p, miR-382, miR-452-5p, miR-1343-5p, miR-193a-3p, miR-2411-3p, miR-106a-5p, miR-17-5p, miR-223-5p, miR-133c, miR-199a-5p, miR-376c-3p, miR-769, miR-3965, miR-3956, miR-574-5p, miR-3068-3p, miR-376c-5p, miR-20b-5p, miR-671-5p, miR-2318, miR-345-5p, miR-93-5p, miR-17-5p, miR-320a, miR-3154, miR-181c-3p, miR-93, miR-374a-3p, miR-1197-3p, miR-16-5p, miR-193a-5p, miR-134-5p, miR-374b-3p, miR-204-5p, miR-592, miR-331-3p, miR-3969, miR-135a-5p, miR-29b-3p, miR-5100, miR-494-5p, miR-134-5p, miR-9-5p, miR-322-5p, miR-758-5p, miR-1224-5p, miR-299a-3p, miR-2285ad, miR-6517, miR-10a-5p, miR-29d-3p, miR-1343-5p, miR-330-5p, miR-345-3p, miR-1290, miR-3578, miR-134, miR-29a-5p, miR-199a-5p, miR-2284y, miR-2284a, miR-28b, miR-2478, miR-450b-5p, miR-1, miR-2403, miR-3529-3p, miR-17-3p, miR-127-5p, miR-217, miR-6119-5p, miR-125a-3p, miR-203-3p, miR-25, miR-499a-3p, miR-3596, miR-489, miR-374b-5p, miR-211-5p, miR-2284g, miR-20a-3p, miR-335-3p, miR-181a-3p, miR-504, miR-140-5p, miR-199b-5p, miR-154a, miR-9-5p, miR-2447, miR-212-3p, miR-885-5p, miR-541-3p, miR-374a-3p, miR-490-5p, miR-769-5p, miR-2285y, miR-2285n, miR-382-3p, miR-455-3p, miR-9788-3p, miR-216a-3p, miR-148b-5p, miR-425-3p, miR-152, miR-529-5p, miR-5010-3p, miR-181b-2, miR-378e, miR-2404, miR-193b-3p, miR-615-5p, miR-182-5p, miR-378a-3p, miR-2331-3p, miR-885-3p, miR-378f, miR-877-3p, miR-6395, miR-1291, miR-378c, miR-193b-3p, miR-378c, miR-145a-3p, miR-138-5p, miR-664a, miR-301a-5p, miR-328-3p, miR-378h, miR-212-5p, miR-6517, miR-1343-3p, miR-2889, miR-378d, miR-30b-3p, miR-138, miR-885-3p, miR-378c, miR-23b-5p, miR-378a-3p, miR-30b-3p, miR-378i, miR-296-5p, miR-378b, miR-301b-5p, miR-2300b-3p, novel\_39, miR-378d, miR-345-3p, miR-2330-5p, miR-193a-3p, miR-422a, miR-182-5p, miR-484, miR-1246, miR-301b-5p, miR-497-5p, miR-195a-5p, miR-16b, miR-222-5p, miR-340-3p, miR-31-5p, miR-133b-5p, miR-15b-5p, miR-322-5p, miR-15a-5p, miR-16a, miR-485-3p, miR-100-3p, miR-16b, miR-301a-5p, miR-15a, miR-424-5p, miR-490-5p, miR-760-3p, miR-16-5p, miR-744-3p, miR-424-5p

novel\_9, miR-374b-3p, miR-134-5p, miR-135a-1-3p, miR-135a-5p, miR-1260b, miR-500b-5p, miR-145-3p, miR-10b-3p, miR-365a-5p, miR-3607-3p, miR-16-5p, miR-381-3p, miR-362-5p, miR-503-3p, miR-141-3p, miR-2355-5p, miR-17-3p, miR-2898, miR-200a-3p, miR-664-3p, miR-2285af, miR-1260a, miR-3071-3p, miR-450b-5p, miR-200a, miR-181a-2-3p, miR-4286, miR-29b-2-5p, miR-300, miR-411-3p, miR-496, miR-155-5p, miR-105-2, miR-134, miR-330-5p, miR-23b-5p, miR-483-3p, miR-322-5p, miR-134-5p, miR-545-5p, miR-450a-1-3p, miR-6119-3p, miR-147-5p, miR-656-5p, miR-421-5p, miR-6402, miR-142b, miR-15a, miR-16a, miR-24-3p, novel\_27, miR-374c-5p, miR-326-3p, novel\_120, novel\_101, miR-542-5p, miR-17-3p, miR-195a-5p, miR-135b-5p, miR-2319a, miR-378b, miR-3065-5p, miR-3591-3p, miR-1306, miR-323a-5p, miR-181b-3p, miR-677, miR-378b, miR-483-3p, miR-660, miR-452-5p, miR-330-3p, miR-365b-5p, miR-105-5p, miR-6240, miR-101-5p, miR-363-5p, miR-1260b, miR-16b, miR-380-3p, miR-497-5p, miR-542-3p, miR-1434-3p, miR-450c-3p, miR-185-5p, miR-412-5p, miR-544b, miR-133b-5p, miR-31-5p, miR-155-5p, miR-17-3p, novel\_74, miR-450b-3p, miR-424-5p, miR-208b-5p, miR-129-5p, miR-655-3p, miR-665, miR-29b-2-5p, miR-98-3p, miR-6134, miR-122-5p, miR-4510, miR-145a-3p, miR-539-5p, novel\_99, miR-186-5p, miR-450a-1-3p, miR-655, miR-411, miR-323-5p, miR-6130, miR-2284s, miR-155-5p, miR-15b-5p, miR-877-5p, miR-660-5p, miR-496-3p, miR-548o-3p, miR-182-5p, miR-21-3p, miR-760-3p, miR-30b-3p, miR-1277-5p, novel\_17, miR-210-5p, miR-542-5p, miR-500a-5p, miR-181b-1-3p, miR-664b-3p, miR-421-5p, miR-380-3p, miR-369-3p, miR-184-3p, let-7a-3p, miR-148a-5p, miR-2284u, miR-218-1-3p, miR-664-5p, miR-376a-5p, miR-5703, miR-98-3p, miR-124-3p, miR-15a-5p, miR-383-5p, miR-532-3p, miR-3600, miR-499a-5p, miR-2284q, miR-3964, miR-107-5p, miR-362-5p, miR-877-3p, miR-212-3p, miR-

miR-6516-3p, miR-155-5p, novel\_74, miR-130b-5p, miR-129-5p, miR-208b-5p, miR-424-5p, miR-1468-5p, miR-29b-2-5p, miR-338-5p, miR-3184-5p, miR-425-5p, miR-1271, miR-30f, miR-186-5p, miR-582-5p, miR-625-5p, miR-299, miR-30d-5p, miR-129b-3p, miR-139-5p, miR-216b-5p, miR-376e-3p, miR-544-3p, miR-582-5p, miR-2284s, miR-15b-5p, miR-155-5p, miR-496-3p, miR-32-3p, miR-532-5p, miR-182-5p, miR-216b-3p, miR-320d, miR-21-3p, miR-30d, miR-30b, miR-216a-5p, miR-29b-1-5p, miR-376a-5p, miR-380-3p, miR-146a-5p, miR-2432, miR-369-3p, miR-4429, miR-148a-5p, miR-133a-3p, miR-16-1-3p, miR-30c-5p, miR-124-3p, miR-15a-5p, miR-23c, miR-23b-3p, miR-7859, miR-210-3p, miR-505-3p, miR-212-5p, miR-3600, miR-3968, miR-4726-5p, miR-30b-5p, miR-107-5p, miR-371a-5p, miR-361-3p, miR-362-5p, miR-7705, miR-1285-5p, miR-423-5p, miR-32-3p, miR-2284j, miR-194b-5p, miR-96-5p, miR-299b-5p, miR-335-3p, miR-3082-5p, miR-489, miR-3596, miR-1185-2-3p, miR-27a-3p, miR-144-5p, miR-2319b, miR-139-5p, miR-499b-5p, miR-103a-2-5p, miR-1468, miR-146b, miR-320b, miR-182-5p, miR-16b, miR-29b-1-5p, miR-424-5p, miR-124a, miR-2284b, miR-33a-5p, miR-23a-3p, miR-544a, miR-299a-5p, miR-3120-5p, miR-2284r, miR-2459, miR-1185-3p, miR-421, miR-500-5p, miR-148b-5p, miR-105-1, miR-330-3p, novel\_78, miR-27a-3p, miR-331-5p, miR-592, miR-2284k, miR-34c-3p, miR-135a-5p, miR-100-3p, miR-144-5p, miR-16-5p, miR-329b, miR-10b-3p, miR-671-5p, miR-1248, miR-7144-5p, miR-3074-1-3p, miR-331-5p, miR-381-3p, miR-30e-5p, miR-320a, miR-362-5p, miR-200a-5p, miR-376c-3p, miR-154b-5p, miR-2284n, miR-324-5p, miR-503-3p, miR-574-5p, miR-2285aa, miR-127-5p, miR-107, miR-28b, miR-2284a, miR-490-3p, miR-200a, miR-1957a, miR-29b-2-5p, miR-300, miR-496, miR-30c, miR-105-2, miR-128-3p, miR-155-5p, miR-3591-5p, miR-30a-5p, miR-218-2-3p, miR-1271-5p, miR-322-5p, miR-302a-5p, miR-545-5p, miR-582-3p, miR-877-3p, miR-1197-3p, novel\_27, miR-181c-5p, miR-2285m, miR-2428, miR-539-5p, miR-145a-3p, miR-885-5p, miR-6128, miR-3607-3p, miR-9-5p, miR-181d-5p, miR-199c, miR-371a-5p, miR-324-3p, miR-135a-5p, miR-582-5p, miR-139-5p, miR-411b-3p, miR-154b-5p, miR-139-5p, miR-548o-3p, miR-542-5p, miR-9851-3p, miR-543-3p, novel\_94, miR-485-5p, miR-582-5p, miR-135b-5p, miR-301, miR-18a-3p, miR-664b-3p, miR-3529-3p, miR-668-3p, miR-466i-5p, miR-181b-5p, novel\_127, miR-196a-3p, novel\_17, miR-431-5p, miR-618, miR-7859, miR-9-5p, miR-222-5p, miR-147a, miR-2284z, miR-9788-3p, miR-2355-3p, miR-18a-3p, miR-199b-3p, novel\_78, miR-222-5p, miR-431, miR-2284aa, miR-873a-5p, miR-181a-5p, miR-3071-5p

TACR3

ENSOARGO(tachykin

SPTLC3

ENSOARGO(serine p.

miR-323a-5p, novel\_69, miR-320c, miR-677, miR-669, miR-181b-3p, miR-150-5p, miR-1291, miR-7975, miR-6516-3p, miR-195a-5p, miR-326-3p, novel\_27, miR-199b-5p, miR-15a, miR-20a-5p, miR-6529b, miR-16a, miR-128-1-5p, miR-31-5p, miR-340-3p, miR-665, miR-412-5p, miR-134-3p, miR-20b, miR-873a-5p, miR-542-3p, miR-1843b-5p, miR-22-3p, miR-450c-3p, miR-374b-3p, miR-138, miR-16b, miR-4508, miR-497-5p, miR-2889, miR-744-5p, miR-363-5p, miR-432-3p, miR-432-3p, novel\_51, miR-106a-5p, miR-17-5p, miR-483-3p, miR-370-3p, miR-2355-5p, miR-615-5p, miR-1271, miR-199a-5p, miR-93-5p, miR-320a, miR-17-5p, miR-3154, miR-329b, miR-20b-5p, miR-23a-5p, miR-16-5p, miR-93, miR-2433, miR-331-3p, miR-3969, miR-138-5p, miR-486b-3p, miR-1224-5p, miR-322-5p, miR-505-5p, miR-302a-5p, miR-483-3p, miR-758-5p, miR-450a-1-3p, miR-214-5p, miR-129-1-3p, miR-2427, miR-330-5p, miR-23b-5p, miR-3064-5p, miR-199a-5p, miR-3065-3p, miR-490-3p, miR-30c-2-3p, miR-2898, novel\_96, miR-543-5p, miR-3064-5p, miR-10b, miR-378g, miR-361-3p, miR-199b-5p, miR-129b-5p, miR-504, miR-9-3p, miR-361-3p, miR-423-5p, miR-4726-5p, miR-2285t, miR-2300a-5p, miR-181b-2-3p, miR-539-5p, miR-2284r, miR-323b, miR-450b-5p, miR-2426, miR-2330-5p, miR-106a-5p, miR-424-5p, miR-30c-1-3p, miR-3187-3p, miR-320b, miR-326, miR-323b-3p, miR-16b, miR-106b-5p, miR-3085-3p, miR-491-5p, miR-199b-5p, miR-2331-3p, miR-504-5p, miR-221-5p, miR-30c-1-3p, miR-3065-3p, miR-27a-5p, miR-323-5p, novel\_32, miR-22-3p, miR-15b-5p, miR-21a-3p, miR-450a-1-3p, miR-1827, miR-145a-3p, miR-129-2-3p, miR-3184-5p, miR-338-3p, miR-6134, miR-320e, miR-665, miR-450b-3p, miR-664a, miR-424-5p, miR-487a-5p, miR-129-5p, miR-106a, miR-383-5p, miR-15a-5p, miR-2284h-5p, miR-2300b-3p, miR-2366, miR-5703, miR-140-3p, miR-142-3p, miR-4429, miR-361-5p, miR-378d, miR-2285w, miR-20a, miR-245-3p, miR-181b-1-3p, miR-486-3p, miR-1247-5p, miR-615-5p, miR-6527, novel\_79, miR-339-5p, miR-339b, miR-128-1-5p, miR-339a, miR-324-3p

LCN2 ENSOARGO(lipocalin) miR-664a, miR-338-3p, miR-101-3p, miR-2285x, miR-323b, miR-323b-3p

NPAS1 ENSOARGO(neuronal) miR-3187-3p, miR-8485, miR-130a-5p, miR-181b-1-3p, miR-4286, miR-382-3p, miR-130b-5p, miR-181b-5p, miR-377-3p, miR-383-5p, miR-181b-2-3p, miR-122-3p, miR-1290, miR-181a-5p, miR-484, miR-7705, miR-181c-5p, miR-181d-5p, miR-130b-5p, miR-142b, novel\_63, miR-181b-3p, miR-677, miR-132-5p, miR-377-3p, miR-3956, miR-2285u, miR-329-5p, miR-574-5p, miR-136-5p, miR-129b-5p, miR-200a-5p, miR-150-5p

DDX43 ENSOARGO(DEAD (As)) miR-2426, miR-16b, miR-493-3p, miR-2284x, miR-27b-3p, miR-497-5p, miR-873a-5p, miR-22-3p, miR-15a-5p, miR-425-3p, miR-2284d, miR-322-5p, miR-103, miR-103a-3p, miR-6517, miR-18a-3p, miR-27a-3p, miR-2284m, novel\_127, miR-107, miR-2285af, miR-16b, miR-324-3p, miR-2284l, miR-2285r, miR-424-5p, miR-2403, miR-107, miR-485-5p, miR-195a-5p, miR-1827, miR-625-5p, miR-361-3p, miR-18a-3p, miR-200a-5p, miR-15b-5p, miR-27a-3p, miR-4443, miR-22-3p, miR-664a, miR-424-5p, miR-15a, miR-2284k, miR-382-5p, miR-16a, miR-2428, miR-2284v, miR-145a-3p, miR-2284j, miR-16-5p, miR-193a-5p

PDPN ENSOARGO(podoplanin) miR-2403, miR-107, miR-485-5p, miR-195a-5p, miR-1827, miR-625-5p, miR-361-3p, miR-18a-3p, miR-200a-5p, miR-15b-5p, miR-27a-3p, miR-4443, miR-22-3p, miR-664a, miR-424-5p, miR-15a, miR-2284k, miR-382-5p, miR-16a, miR-2428, miR-2284v, miR-145a-3p, miR-2284j, miR-16-5p, miR-193a-5p

MRPS11 ENSOARGO(mitochondrial) miR-2403, miR-107, miR-485-5p, miR-195a-5p, miR-1827, miR-625-5p, miR-361-3p, miR-18a-3p, miR-200a-5p, miR-15b-5p, miR-27a-3p, miR-4443, miR-22-3p, miR-664a, miR-424-5p, miR-15a, miR-2284k, miR-382-5p, miR-16a, miR-2428, miR-2284v, miR-145a-3p, miR-2284j, miR-16-5p, miR-193a-5p

miR-216c-5p, miR-494-3p, miR-6240, let-7c-3p, miR-345-3p, miR-376c-5p, miR-376b-5p, miR-2432, miR-320b, miR-330-3p, miR-500a-5p, miR-320d, miR-330-3p, miR-548w, miR-5010-3p, miR-2285g, miR-185-5p, miR-3431, novel\_116, miR-2285e, miR-4429, let-7a-3p, novel\_120, miR-3059-5p, miR-590-3p, miR-2285f, miR-6527, miR-3607-3p, miR-2285x, let-7b-3p, novel\_63, miR-100-3p, miR-2285t, miR-2285u, miR-3956, miR-7-1-3p, miR-374c-3p, miR-320c, miR-2285ab, miR-2285c, miR-129b-3p, miR-320a, let-7g-3p, miR-299b-5p, miR-186-5p, miR-23c, miR-148b-3p, miR-383-5p, miR-23b-3p, miR-3600, novel\_73, miR-133a-3p, miR-362-3p, miR-217-5p, miR-140-3p, miR-188-3p, miR-124-3p, miR-181b-1-3p, miR-664b-3p, miR-369-3p, miR-2484, miR-1277-5p, miR-2285p, miR-139-5p, miR-544-3p, miR-377-3p, miR-301a-3p, miR-877-5p, novel\_25, miR-660-5p, miR-552-3p, miR-532-5p, miR-216b-3p, miR-370-5p, novel\_99, miR-186-5p, miR-543-3p, miR-625-5p, miR-21a-3p, miR-655, miR-27b-5p, miR-206-3p, miR-181c-5p, miR-2330-3p, miR-17-3p, miR-6516-3p, miR-454-3p, miR-2285j, miR-320e, miR-655-3p, miR-19b-1-5p, miR-151-3p, miR-376b-3p, miR-1185-3p, miR-126a-5p, miR-500-5p, miR-216a-3p, miR-151a-3p, miR-1343-3p, miR-330-3p, miR-181b-2-3p, miR-450b-5p, miR-544a, miR-101a-5p, miR-362-3p, miR-1388-5p, miR-1839-5p, miR-101c, miR-329-3p, miR-484, miR-30b-3p, miR-1a-3p, miR-501-3p, miR-1b-5p, miR-8485, miR-2330-5p, miR-124a, miR-2284b, miR-33a-5p, let-7c-3p, miR-23a-3p, miR-130b-3p, miR-491-5p, miR-3085-3p, miR-326, miR-505, miR-362-3p, miR-7857-3p, miR-500-3p, miR-4443, miR-1185-2-3p, miR-376d, miR-20a-3p, miR-139-5p, miR-3064-5p, miR-664b, miR-126b-5p, miR-7977, miR-1983, miR-9-3p, miR-493-5p, miR-376a-3p, miR-362-5p, miR-7705, miR-502-3p, miR-9-3p, miR-885-5p, miR-181d-5p, miR-6527, miR-628-3p, novel\_82, miR-2285n, miR-382-3p, miR-302a-5p, miR-24-2-5p, miR-545-5p, miR-376a-5p, miR-501-3p, miR-330-5p, miR-1343-5p, miR-7134-5p, miR-148b-5p, miR-450b-5p, miR-2285b, miR-192-3p, miR-1957a, miR-3064-5p, miR-1, miR-2385-3p, miR-1a-2-5p, miR-181b-5p, miR-17-3p, miR-152-3p, novel\_96, miR-200a-3p, miR-107, miR-664-3p, miR-2397-5p, miR-2285af, miR-205-5p, miR-376b-3p, miR-217, miR-574-5p, miR-141-3p, miR-1271, miR-2285aa, miR-329a, miR-767, miR-7144-5p, miR-190a-3p, novel\_48, miR-424-3p, miR-301, miR-488-3p, miR-362-5p, miR-3154, miR-500b-5p, miR-103b, miR-3607-

MIER1 ENSOARGO(mesoderm)

SEC63 ENSOARGO(SEC63)

miR-139-5p, miR-378e, miR-3596, miR-4443, miR-181b-3p, miR-677, miR-148a-3p, miR-361-3p, miR-378f, miR-379-5p, miR-342-3p, novel\_101, miR-24-3p, miR-423-5p, miR-206, miR-4726-5p, miR-2284q, miR-1843a-3p, miR-1343-3p, miR-181b-2-3p, miR-185-5p, miR-432-5p, miR-153, miR-194-3p, miR-9788-3p, miR-143-5p, miR-432, miR-378b, miR-1a-3p, miR-1388-5p, miR-378c, miR-744-5p, miR-3120-5p, miR-101c, miR-1388-3p, miR-363-5p, miR-30c-1-3p, miR-378d, miR-296-3p, miR-296-3p, miR-377-3p, miR-342, miR-197-5p, miR-3955-3p, miR-1468, miR-153-3p, miR-2331-3p, miR-30c-1-3p, miR-378a-3p, miR-615-5p, miR-296-3p, miR-216b-3p, miR-139-5p, miR-377-3p, miR-6516, miR-151b, miR-324-5p, novel\_32, miR-876-3p, miR-485-5p, miR-378c, miR-206-3p, miR-338-3p, miR-6134, miR-3184-5p, miR-10b-3p, miR-378c, miR-665, miR-331-3p, miR-1468-5p, miR-31-3p, miR-1224-5p, miR-378h, miR-6516-5p, miR-148b-3p, miR-2284h-5p, miR-151-5p, miR-1290, miR-378i, miR-1197-5p, miR-140-3p, miR-378a-3p, miR-2285w, miR-181b-1-3p, miR-450b-5p, novel\_39, miR-92a-1-5p, miR-422a, miR-324-3p, miR-30c-2-3p, miR-760-3p, miR-466i-5p, miR-450a-2-3p, miR-2898, miR-152-3p

HBM ENSOARGOC hemoglobin

miR-23b, let-7g-3p, let-7a-2-3p, miR-147-5p, miR-23a-3p, miR-23b-3p, miR-23c, miR-4532, let-7a-2-3p

GPKOW ENSOARGOC G patch

miR-17-3p, miR-29c-3p, novel\_27, miR-2285m, miR-2428, miR-24-3p, miR-371b-3p, miR-425-5p, miR-576-3p, miR-133a-5p, miR-421-5p, miR-29a, miR-206, miR-320b, miR-3120-3p, miR-329-5p, miR-677, miR-181b-3p, miR-2404, miR-411b-3p, miR-374c-3p, miR-299b-3p, miR-29a-3p, miR-146b-5p, miR-1291, miR-450b-3p, miR-668-3p, miR-2483-5p, miR-363-5p, miR-628-5p, miR-130b-5p, miR-6240, let-7j, miR-330-3p, miR-2411-3p, miR-224-5p, miR-146a, miR-377-3p, miR-2285l, miR-339-5p, miR-187-3p, miR-149-5p, miR-2285g, miR-134-3p, miR-185-5p, miR-22-3p, novel\_23, miR-19b-2-5p, miR-2889, miR-29b, miR-30b-3p, miR-1260b, miR-193a-5p, miR-374b, miR-1260b, miR-331-3p, miR-3969, miR-409-3p, miR-29b-3p, miR-135a-1-3p, miR-28-5p, miR-370-3p, miR-2355-5p, miR-3956, miR-3957-5p, miR-874-3p, miR-154b-5p, miR-3957, miR-300-3p, miR-769, miR-488-3p, miR-30a-3p, miR-1, miR-181a-2-3p, novel\_39, miR-200a, miR-30c-2-3p, miR-339a, miR-1260a, miR-125a-3p, miR-543-5p, miR-17-3p, miR-2898, novel\_79, miR-7641, miR-2285ad, miR-299a-3p, miR-486-5p, miR-505-5p, miR-2411-5p, miR-6516-5p, miR-29d-3p, miR-30a-5p, miR-345-3p, miR-1290, miR-30c, miR-582-3p, miR-6527, novel\_60, miR-3956-3p, miR-423-5p, miR-2285y, miR-769-5p, miR-371a-5p, miR-30b-5p, novel\_82, miR-374b-5p, miR-7977, miR-4443, miR-3596, miR-25, miR-378g, miR-129b-5p, miR-409-5p, miR-335-3p, miR-504, miR-652-5p, miR-1388-3p, miR-124a, miR-2330-5p, miR-8485, miR-30c-1-3p, miR-214-3p, miR-25-5p, miR-222-5p, miR-181b-2-3p, miR-2300a-5p, miR-1343-3p, miR-330-3p, miR-455-3p, miR-2285e, miR-147a, miR-1a-3p, miR-30b-3p, miR-6529a, miR-484, miR-143-5p, miR-1388-5p, miR-450b-5p, miR-214, miR-3184-3p, miR-145a-3p, miR-3184-5p, miR-338-3p, miR-769-5p, miR-206-3p, miR-224-5p, miR-30a-3p, miR-19b-1-5p, miR-320e, miR-30e-3p, miR-500, miR-129-5p, miR-708-5p, miR-1102, miR-130b-5p, novel\_74, miR-17-3p, miR-664a, miR-2331-

CDCP1 ENSOARGOC CUB domain

miR-7641, miR-2284z, novel\_83, miR-199a-3p, miR-328-3p, novel\_121, miR-302a-5p, miR-6516-5p, miR-222-5p, miR-2411-5p, miR-188-3p, miR-217-5p, miR-1193, novel\_133, miR-2300b-3p, miR-128-3p, miR-582-3p, miR-329a-5p, miR-105-3p, miR-2411, miR-29b-1-5p, miR-181b-1-3p, miR-219b-5p, miR-217, miR-181c-3p, miR-2285af, miR-2285p, miR-618, miR-543-5p, miR-21-3p, miR-450a-2-3p, miR-370-3p, miR-2285aa, miR-21-3p, miR-615-5p, miR-140-5p, miR-574-5p, miR-204-3p, novel\_25, miR-324-5p, miR-582-5p, miR-6516, miR-769, miR-376c-5p, miR-488-3p, miR-2285c, miR-376c-5p, miR-582-5p, miR-1814c, miR-876-3p, miR-10b-3p, miR-2312, miR-6128, miR-3958-5p, miR-3074-2-3p, miR-145a-3p, miR-2284v, miR-181c-3p, miR-769-5p, miR-181b-2-3p, miR-27a-3p, miR-3955-5p, miR-548w, miR-133b-5p, miR-216a-3p, miR-194-3p, miR-1185-3p, miR-2285e, miR-2285g, miR-147a, miR-185-5p, miR-374b-3p, miR-653, miR-2284aa, miR-27b-3p, miR-2284x, miR-299a-5p, miR-450b-5p, miR-668-3p, let-7f-2-3p, let-7f-2-3p, miR-493-5p, miR-2310, miR-432-3p, miR-2284l, miR-29b-1-5p, miR-505, miR-323b-3p, miR-2957, miR-199a-3p, miR-103a-2-5p, miR-2285o, miR-655-5p, miR-329-5p, miR-677, miR-669, miR-181b-3p, miR-1185-2-3p, miR-27a-3p, miR-7857-3p, miR-670-3p, miR-411b-3p, miR-216a-3p, miR-129b-5p, miR-2285ab, miR-376b-5p, miR-493-5p, miR-6395, miR-1983, miR-181a-3p, miR-410-5p, miR-412-3p, miR-2285f, miR-2447, miR-323c, novel\_111, miR-769-5p, miR-107-5p, novel\_82 miR-3578, miR-124-3p, miR-2285y, miR-105-5p, miR-105-2, miR-2285ad, miR-124a, miR-105-1, miR-3074-2-3p miR-2285f, miR-193b-3p, miR-190b-5p, miR-3059-5p, miR-2447, novel\_27, miR-326-3p, miR-877-3p, miR-361-3p, miR-211, novel\_82, miR-656-5p, novel\_1, miR-655-5p, miR-211-5p, miR-7977, miR-4792, miR-20a-3p, miR-677, miR-144-3p, miR-4443, miR-181b-3p, miR-670-3p, miR-299b-3p, miR-2285ab, miR-18b, novel\_94, miR-877-3p, miR-1983, miR-3963, miR-450b-3p, miR-412-3p, miR-33a-5p, miR-1388-3p, miR-8485, miR-3187-3p, miR-2285r, miR-30c-1-3p, miR-190a, miR-455-5p, miR-7-5p, miR-377-3p, miR-326, miR-660, miR-103a-2-5p, miR-193a-3p, miR-491-5p, miR-3955-3p, miR-181b-2-3p, miR-2300a-5p, novel\_78, miR-2285e, miR-2285g, miR-412-5p, miR-147a, miR-3431, miR-3071-5p, miR-30b-3p, miR-2284r, miR-7b-5p, miR-455-5p, miR-30b-3p, miR-1388-5p, miR-425-5p, miR-539-5p, novel\_42, miR-145a-3p, miR-6134, miR-6525, miR-144, miR-331-3p, miR-665, miR-190a-5p, miR-134-5p, miR-204-5p, miR-370-3p, miR-3065-3p, miR-532-5p, miR-1271, miR-141-3p, miR-30c-1-3p, miR-2331-3p, miR-221-5p, miR-660-5p, miR-204-3p, miR-154b-5p, miR-2284s, miR-6516, miR-377-3p, miR-193b-3p, miR-18a, miR-488-3p, miR-2285c, miR-671-5p, miR-485-5p, miR-18a-5p, miR-3065-3p, miR-2432, miR-490-3p, miR-181b-1-3p, miR-130a-5p, miR-30c-2-3p, miR-221-5p, miR-200a-3p, miR-299-3p, novel\_96, miR-466i-5p, miR-18b-5p, miR-299a-3p, miR-134-5p, novel\_121, miR-6516-5p, miR-218-2-3p, miR-2904, miR-2427, miR-330-5p, miR-23b-5p, miR-140-3p, novel\_133, miR-134, miR-2300b-3p, miR-218-1-3p, miR-33b-3p, miR-184-3p

GOSR1 ENSOARGO(golgi SN.26c, miR-665, miR-34c-3p, miR-2284k, miR-2332, miR-129-5p, miR-181b-2-3p, miR-27a-3p, miR-3955-5p, miR-548w, miR-133b-5p, miR-216a-3p, miR-194-3p, miR-1185-3p, miR-2285e, miR-2285g, miR-147a, miR-185-5p, miR-374b-3p, miR-653, miR-2284aa, miR-27b-3p, miR-2284x, miR-299a-5p, miR-450b-5p, miR-668-3p, let-7f-2-3p, let-7f-2-3p, miR-493-5p, miR-2310, miR-432-3p, miR-2284l, miR-29b-1-5p, miR-505, miR-323b-3p, miR-2957, miR-199a-3p, miR-103a-2-5p, miR-2285o, miR-655-5p, miR-329-5p, miR-677, miR-669, miR-181b-3p, miR-1185-2-3p, miR-27a-3p, miR-7857-3p, miR-670-3p, miR-411b-3p, miR-216a-3p, miR-129b-5p, miR-2285ab, miR-376b-5p, miR-493-5p, miR-6395, miR-1983, miR-181a-3p, miR-410-5p, miR-412-3p, miR-2285f, miR-2447, miR-323c, novel\_111, miR-769-5p, miR-107-5p, novel\_82

HSD17B7 ENSOARGO(hydroxys miR-3578, miR-124-3p, miR-2285y, miR-105-5p, miR-105-2, miR-2285ad, miR-124a, miR-105-1, miR-3074-2-3p miR-2285f, miR-193b-3p, miR-190b-5p, miR-3059-5p, miR-2447, novel\_27, miR-326-3p, miR-877-3p, miR-361-3p, miR-211, novel\_82, miR-656-5p, novel\_1, miR-655-5p, miR-211-5p, miR-7977, miR-4792, miR-20a-3p, miR-677, miR-144-3p, miR-4443, miR-181b-3p, miR-670-3p, miR-299b-3p, miR-2285ab, miR-18b, novel\_94, miR-877-3p, miR-1983, miR-3963, miR-450b-3p, miR-412-3p, miR-33a-5p, miR-1388-3p, miR-8485, miR-3187-3p, miR-2285r, miR-30c-1-3p, miR-190a, miR-455-5p, miR-7-5p, miR-377-3p, miR-326, miR-660, miR-103a-2-5p, miR-193a-3p, miR-491-5p, miR-3955-3p, miR-181b-2-3p, miR-2300a-5p, novel\_78, miR-2285e, miR-2285g, miR-412-5p, miR-147a, miR-3431, miR-3071-5p, miR-30b-3p, miR-2284r, miR-7b-5p, miR-455-

MMP19 ENSOARGO(matrix m 5p, miR-30b-3p, miR-1388-5p, miR-425-5p, miR-539-5p, novel\_42, miR-145a-3p, miR-6134, miR-6525, miR-144, miR-331-3p, miR-665, miR-190a-5p, miR-134-5p, miR-204-5p, miR-370-3p, miR-3065-3p, miR-532-5p, miR-1271, miR-141-3p, miR-30c-1-3p, miR-2331-3p, miR-221-5p, miR-660-5p, miR-204-3p, miR-154b-5p, miR-2284s, miR-6516, miR-377-3p, miR-193b-3p, miR-18a, miR-488-3p, miR-2285c, miR-671-5p, miR-485-5p, miR-18a-5p, miR-3065-3p, miR-2432, miR-490-3p, miR-181b-1-3p, miR-130a-5p, miR-30c-2-3p, miR-221-5p, miR-200a-3p, miR-299-3p, novel\_96, miR-466i-5p, miR-18b-5p, miR-299a-3p, miR-134-5p, novel\_121, miR-6516-5p, miR-218-2-3p, miR-2904, miR-2427, miR-330-5p, miR-23b-5p, miR-140-3p, novel\_133, miR-134, miR-2300b-3p, miR-218-1-3p, miR-33b-3p, miR-184-3p



miR-6535, miR-144-3p, miR-2483-3p, miR-25, miR-499a-3p, miR-211-5p, miR-216b-3p, miR-4792, miR-195a-5p, miR-140-5p, miR-2284w, miR-423-5p, miR-211, miR-363-3p, miR-135a-2-3p, novel\_1, miR-92a-3p, miR-16a, miR-15a, miR-9788-3p, miR-142-3p, miR-26b-3p, miR-497-5p, miR-219a-1-3p, miR-16b, miR-19b-2-5p, miR-653, miR-296-3p, miR-432-3p, miR-30c-1-3p, miR-424-5p, miR-101b-3p, miR-214-3p, miR-466f-3p, miR-124-5p, miR-16b, miR-32, miR-296-3p, miR-15b-5p, miR-6130, miR-25-3p, miR-499b-3p, miR-532-5p, miR-552-3p, miR-32-5p, miR-140-5p, miR-30c-1-3p, miR-625-5p, miR-27b-5p, miR-21a-3p, miR-3184-5p, miR-214, miR-103b, miR-16-5p, miR-4510, miR-204-5p, miR-424-5p, miR-19b-1-5p, miR-144, novel\_83, miR-15a-5p, miR-302a-5p, miR-322-5p, miR-33b-3p, miR-142a-3p, miR-92b-3p, miR-450b-5p, miR-181a-2-3p, miR-183-5p, miR-92a-3p, miR-127-5p, miR-30c-2-3p, miR-2447, miR-3956-3p, miR-6527, miR-361-3p, miR-1285-5p, miR-7705, miR-218-5p, miR-101-3p, miR-2440, miR-499a-5p, miR-2285u, miR-3596, miR-378g, miR-2483-3p, miR-203-3p, miR-4443, miR-500-3p, miR-140-5p, miR-668-5p, miR-376a-3p, miR-1983, miR-124a, miR-744-3p, miR-8485, miR-199a-3p, miR-16b, miR-491-5p, miR-1185-5p, miR-487b-5p, miR-146b, miR-199b-5p, miR-548w, miR-1343-3p, miR-376b-3p, miR-147a, miR-1298-3p, miR-455-3p, miR-2459, miR-501-3p, miR-758-3p, miR-1388-5p, miR-101c, miR-6525, miR-224-5p, miR-122-5p, miR-2285j, miR-30e-3p, miR-30a-3p, miR-151-3p, miR-665, miR-3604, miR-190a-5p, miR-874-5p, miR-30c-1-3p, miR-2331-3p, miR-15b-5p, miR-2285c, miR-129b-3p, miR-411, miR-345-5p, miR-339b, miR-625-5p, miR-186-5p, miR-329a-5p, miR-195a-3p, miR-377-5p, miR-142a-3p, miR-486-3p, miR-210-5p, miR-2285p, miR-324-3p, miR-92a-1-5p, miR-18a-3p, miR-30d-3p, miR-193b-5p, miR-2366, miR-218-1-3p, miR-133a-3p, miR-361-5p, miR-29c-3p, miR-199b-5p, miR-2284w, miR-4324, miR-1247-3p, miR-142b, novel\_87, miR-6119-3p, miR-379-3p, miR-29a, novel\_68, miR-329-5p, miR-216b-3p, miR-411b-3p, miR-374c-3p, miR-677, miR-320c, miR-3141, miR-1306, miR-150-5p, miR-216a-3p, miR-3065-5p, miR-412-3p, miR-146b-5p, miR-668-3p, miR-503-3p, miR-7-5p, miR-146a, miR-3141, miR-365b-5p, miR-378a-5p, miR-31-5p, miR-339-5p, miR-412-5p, miR-134-3p, miR-149-5p, miR-708-3p, miR-223-3p, miR-7b-5p, miR-22-3p, miR-16b, miR-4508, miR-497-5p, novel\_42, miR-16-5p, miR-1260b, miR-2433, miR-125b-5p, miR-574-5p, miR-2355-5p, miR-125a, miR-3959-5p, miR-301, miR-767, miR-2318, miR-345-5p, miR-1248, miR-450b-5p, novel\_39, miR-29a-5p, novel\_96, novel\_127, miR-6517, miR-429-3p, miR-412, novel\_79, miR-18b-5p, miR-322-5p, miR-1290, miR-155-5p, novel\_60, miR-3059-5p, miR-2285f, miR-502-3p, miR-371a-5p, miR-1726-5p, miR-152-3p, miR-20a-3p, miR-100b-5p, miR-151-

NSF

ENSOARGO(N-ethylm

NAIF1

ENSOARGO(nuclear

|         |                    |                                                                                                                                                                                                                                                                                                                                                                                                                                                                                                                                                                                                                                                                                                                                                                                                                                                                                                                                                                                                                                                                                                                                                                                                                                                                                                                                                                                                                                                                                                                                                                                                                                                                                                                                                                                                                                                                                                                                                                                                                                                                                                                                          |
|---------|--------------------|------------------------------------------------------------------------------------------------------------------------------------------------------------------------------------------------------------------------------------------------------------------------------------------------------------------------------------------------------------------------------------------------------------------------------------------------------------------------------------------------------------------------------------------------------------------------------------------------------------------------------------------------------------------------------------------------------------------------------------------------------------------------------------------------------------------------------------------------------------------------------------------------------------------------------------------------------------------------------------------------------------------------------------------------------------------------------------------------------------------------------------------------------------------------------------------------------------------------------------------------------------------------------------------------------------------------------------------------------------------------------------------------------------------------------------------------------------------------------------------------------------------------------------------------------------------------------------------------------------------------------------------------------------------------------------------------------------------------------------------------------------------------------------------------------------------------------------------------------------------------------------------------------------------------------------------------------------------------------------------------------------------------------------------------------------------------------------------------------------------------------------------|
|         |                    | miR-30b-3p, miR-16-1-3p, miR-101c, miR-27b-3p, miR-2284x, miR-412-3p, miR-30b-3p, miR-1298-3p, miR-1343-3p, miR-548w, miR-27a-3p, miR-3085-3p, miR-2285l, miR-224-5p, miR-296-3p, miR-431-5p, miR-654-3p, miR-296-3p, miR-127-3p, miR-652-5p, novel_94, miR-18a-3p, miR-378b, miR-146b-3p, miR-6535, miR-27a-3p, miR-3064-5p, miR-20a-3p, miR-499b-5p, miR-320b, miR-211-5p, miR-128-1-5p, novel_1, miR-147-5p, miR-218-5p, miR-371a-5p, miR-211, miR-154a, miR-2428, miR-2285m, miR-2447, miR-452-5p, miR-16-1-3p, miR-3591-5p, miR-140-3p, miR-671-3p, miR-545-5p, miR-18a-3p, miR-3960, miR-412, miR-431, novel_127, miR-21-3p, novel_17, miR-3064-5p, miR-2385-3p, miR-1827, miR-503-3p, miR-331-5p, miR-204-3p, miR-154b-5p, miR-2331-3p, miR-874-3p, miR-548o-3p, miR-2355-5p, miR-331-5p, miR-204-5p, miR-224-5p, miR-145a-3p, miR-425-5p                                                                                                                                                                                                                                                                                                                                                                                                                                                                                                                                                                                                                                                                                                                                                                                                                                                                                                                                                                                                                                                                                                                                                                                                                                                                                         |
| RHNO1   | ENSOARGO(RAD9-HUS  |                                                                                                                                                                                                                                                                                                                                                                                                                                                                                                                                                                                                                                                                                                                                                                                                                                                                                                                                                                                                                                                                                                                                                                                                                                                                                                                                                                                                                                                                                                                                                                                                                                                                                                                                                                                                                                                                                                                                                                                                                                                                                                                                          |
|         |                    | miR-16-1-3p, miR-199b-5p, miR-143-5p, miR-148a-3p, miR-199a-5p, miR-301a-3p, miR-148b-3p, miR-130a-3p, miR-199b-5p, miR-454-3p, miR-152-3p, miR-4726-5p, miR-130b-3p, miR-2285p, miR-199a-5p, miR-301b-3p, miR-199b-5p, miR-219b-3p, miR-450a-5p, miR-3958-3p, miR-2285y, miR-382-3p, miR-128b-5p, miR-362-5p, miR-194b-5p, miR-9-5p, miR-212-3p, miR-3059-5p, miR-1983, miR-544-5p, miR-493-5p, miR-504, miR-4443, miR-1185-2-3p, miR-203-3p, miR-3082-5p, miR-499a-3p, miR-2285u, miR-20a-3p, miR-3064-5p, miR-3085-3p, miR-491-5p, miR-106b-5p, miR-16b, miR-182-5p, miR-29b-1-5p, miR-2957, miR-320b, miR-199a-3p, miR-758-3p, miR-2284b, miR-23a-3p, miR-106a-5p, miR-424-5p, miR-16-2-3p, miR-101c, miR-2284aa, miR-2426, miR-1388-5p, miR-758-3p, miR-484, miR-2284r, miR-1185-3p, miR-421, miR-500-5p, miR-148b-5p, miR-5010-3p, miR-199b-3p, miR-151a-3p, miR-2300a-5p, miR-208b-5p, miR-424-5p, miR-17-3p, novel_74, miR-29b-2-5p, miR-338-5p, miR-664a-5p, miR-151-3p, miR-19b-1-5p, miR-2285j, miR-122-5p, miR-345-5p, let-7g-3p, miR-129b-3p, miR-15b-5p, miR-22-3p, miR-193b-3p, miR-216b-5p, miR-499b-3p, miR-6516, miR-296-3p, miR-182-5p, miR-532-5p, miR-496-3p, miR-2331-3p, miR-504-5p, miR-466i-5p, miR-202-5p, miR-106a, miR-320d, miR-185-3p, miR-92a-1-5p, miR-500a-5p, miR-196a-3p, miR-2424, miR-125b-2-3p, miR-376a-5p, miR-29b-1-5p, miR-20a, miR-195a-3p, miR-2285w, miR-216c-5p, miR-183-5p, miR-2284u, miR-378d, miR-148a-5p, miR-16-1-3p, miR-218-1-3p, novel_73, miR-4429, miR-140-3p, miR-5703, miR-1434-5p, miR-1246, miR-2300b-3p, miR-2284h-5p, miR-199a-3p, miR-15a-5p, miR-487a-3p, miR-23b-3p, miR-212-5p, miR-485-3p, miR-505-3p, miR-3600, miR-106a, miR-18a-3p, miR-199c, miR-22-5p, miR-29a, miR-16a, miR-485-3p, miR-20a-5p, miR-28c, miR-142b, miR-576-3p, miR-502-5p, miR-15a, miR-2428, novel_27, miR-3959-3p, miR-17-3p, miR-29c-3p, miR-193b-3p, miR-505-3p, miR-135b-5p, miR-195a-5p, miR-412-3p, miR-107, miR-18a-3p, miR-21c, miR-216a-3p, miR-376b-5p, miR-320c, novel_69, miR-29a-3p, miR-2404, miR-466f-3p, miR-193a-3p, miR-196b-5p, miR-194a, miR-106a-5p, miR-17-5p, miR-296- |
| SLC35D1 | ENSOARGO(solute c. |                                                                                                                                                                                                                                                                                                                                                                                                                                                                                                                                                                                                                                                                                                                                                                                                                                                                                                                                                                                                                                                                                                                                                                                                                                                                                                                                                                                                                                                                                                                                                                                                                                                                                                                                                                                                                                                                                                                                                                                                                                                                                                                                          |
|         |                    |                                                                                                                                                                                                                                                                                                                                                                                                                                                                                                                                                                                                                                                                                                                                                                                                                                                                                                                                                                                                                                                                                                                                                                                                                                                                                                                                                                                                                                                                                                                                                                                                                                                                                                                                                                                                                                                                                                                                                                                                                                                                                                                                          |
| OOEP    | ENSOARGO(oocyte e. |                                                                                                                                                                                                                                                                                                                                                                                                                                                                                                                                                                                                                                                                                                                                                                                                                                                                                                                                                                                                                                                                                                                                                                                                                                                                                                                                                                                                                                                                                                                                                                                                                                                                                                                                                                                                                                                                                                                                                                                                                                                                                                                                          |

miR-452-5p, miR-541-3p, miR-809b, miR-129b-5p, miR-199b-5p, miR-541-5p, miR-664b, miR-3064-5p, let-7d-5p, miR-7857-3p, miR-489, miR-3082-5p, miR-362-3p, miR-342, miR-1306-5p, miR-326, let-7e, miR-1468, miR-3085-3p, miR-376b, let-7a-5p, miR-106a-5p, miR-424-5p, miR-3187-3p, miR-491-3p, miR-7857, miR-30b-3p, miR-484, miR-143-5p, miR-3120-5p, miR-450b-5p, miR-5010-3p, miR-105-1, miR-151a-3p, miR-2300a-5p, miR-29d-5p, miR-424-5p, miR-487a-5p, miR-450b-3p, miR-6516-3p, miR-17-3p, miR-2330-3p, miR-3074-2-3p, miR-4510, miR-145a-3p, let-7b-5p, miR-338-3p, miR-29c-5p, miR-3613-5p, let-7f-1-3p, novel\_99, miR-582-5p, miR-370-5p, miR-21-3p, miR-182-5p, miR-496-3p, miR-6516, miR-139-5p, miR-6130, miR-30b-3p, miR-1277-5p, miR-299-3p, miR-21-3p, miR-106a, miR-466i-5p, miR-760-3p, miR-20a, miR-216c-5p, miR-183-5p, miR-146a-5p, miR-29b-1-5p, miR-130a-5p, miR-2904, novel\_133, miR-362-3p, let-7a-3p, miR-1b-3p, miR-3600, novel\_83, miR-199a-3p, miR-383-5p, miR-148b-3p, miR-15a-5p, miR-16a, let-7i, miR-382-5p, miR-15a, miR-20a-5p, miR-656-5p, miR-199c, novel\_1, miR-17-3p, miR-1193, miR-342-3p, novel\_120, miR-219b-3p, miR-136-3p, novel\_27, miR-326-3p, miR-211, miR-323c, miR-3959-3p, miR-21c, miR-18a-3p, miR-378b, miR-195a-5p, miR-107, miR-146b-3p, miR-670-3p, miR-17-5p, miR-106a-5p, miR-455-5p, miR-452-5p, miR-466f-3p, miR-124-5p, miR-363-5p, miR-296-3p, miR-345-5p, miR-3071-5p, miR-145a-5p, miR-873a-5p, miR-1434-3p, miR-455-5p, miR-21-5p, miR-30b-3p, miR-380-3p, miR-219a-1-3p, miR-103, miR-20b, miR-185-5p, let-7g-5p, miR-409-3p, miR-370-5p, miR-5100, miR-410-3p, miR-374b-3p, miR-204-5p, miR-103b, miR-1306-5p, miR-323-3p, miR-93, miR-374a-3p, miR-3154, miR-17-5p, miR-488-3p, miR-7144-5p, miR-485-5p, miR-1814c, miR-10b-3p, let-7g-3p, miR-199a-5p, miR-324-5p, miR-151b-5p, miR-374c-3p, miR-365a-3p, let-7c-5p, miR-107, miR-147-3p, miR-27b-3p, miR-2889, miR-484, miR-665, miR-331-3p, miR-27a-3p, miR-2285m, novel\_25, miR-181a-2-3p, miR-27a-3p

RGS4 ENSOARGO(regulato

HEPACAM ENSOARGO(hepatic

miR-320b, miR-3120-3p, miR-26b-5p, miR-378b, miR-653b, miR-146b-3p, miR-2404, miR-411b-3p, miR-29a-3p, miR-374c-3p, miR-216a-3p, miR-18a-3p, miR-2387, miR-146b-5p, miR-9851-3p, miR-195a-5p, miR-1291, novel\_101, miR-29c-3p, miR-219b-3p, miR-2284w, miR-16a, miR-33a-3p, miR-15a, miR-502-5p, miR-147-5p, miR-6123, miR-502b, miR-6119-3p, miR-29a, novel\_1, miR-26b-3p, miR-31-5p, miR-411-5p, novel\_116, miR-194-3p, miR-544b, miR-185-5p, miR-450c-3p, miR-22-3p, miR-197-3p, miR-873a-5p, miR-19b-2-5p, miR-653, miR-1434-3p, miR-542-3p, miR-497-5p, miR-455-5p, miR-27b-3p, miR-16b, miR-138, miR-29b, miR-363-5p, miR-668-3p, miR-6240, miR-432-3p, miR-330-3p, miR-197-5p, miR-365b-5p, miR-455-5p, miR-224-5p, miR-146a, miR-1343-5p, miR-466f-3p, miR-483-3p, miR-370-3p, miR-300-3p, miR-331-5p, miR-488-3p, miR-3074-1-3p, miR-1814c, miR-671-5p, miR-193a-5p, miR-16-5p, miR-1306-5p, miR-365a-5p, miR-1197-3p, miR-29b-3p, miR-135a-1-3p, miR-5100, miR-134-5p, miR-138-5p, miR-412, miR-1224-5p, miR-431, miR-2285ad, miR-6517, miR-134-5p, miR-582-3p, miR-450a-1-3p, miR-302a-5p, miR-322-5p, miR-505-5p, miR-483-3p, miR-2411-5p, miR-6516-5p, miR-218-2-3p, miR-1343-5p, miR-29d-3p, miR-134, miR-1290, miR-128-3p, miR-3064-5p, miR-181a-2-3p, miR-3065-3p, miR-29a-5p, miR-2285b, miR-450c-5p, miR-30c-2-3p, miR-2285af, miR-200c, miR-125a-3p, miR-543-5p, novel\_96, novel\_127, miR-2898, miR-450a-2-3p, miR-200c-3p, miR-499b-5p, miR-139-5p, miR-3064-5p, miR-2319b, miR-20a-3p, miR-203-3p, miR-27a-3p, miR-499a-3p, miR-2483-3p, miR-3082-5p, miR-378j, miR-129b-5p, miR-140-5p, miR-452-5p, let-7i-3p, miR-3059-5p, miR-541-3p, miR-1285-5p, miR-2285y, miR-218-5p, miR-2440, miR-101-3p, miR-2284q, miR-628-3p, miR-450a-5p, miR-27a-3p, novel\_4, novel\_78, miR-330-3p, miR-409b, miR-216a-3p, miR-455-3p, miR-147a, miR-412-3p, miR-484, miR-6529a, miR-541, miR-101c, miR-1388-5p, miR-

miR-3074-5p, miR-655-5p, miR-10a-5p, miR-3120-3p, miR-2404, miR-323a-5p, miR-670-3p, miR-677, miR-144-3p, miR-181b-3p, miR-2387, miR-148a-3p, miR-150-5p, miR-3591-3p, miR-376b-3p, miR-21c, miR-410-5p, miR-450b-3p, miR-412-3p, miR-9851-3p, miR-2319a, miR-219b-3p, miR-342-3p, miR-1839-3p, miR-17-3p, miR-502-5p, miR-6119-3p, miR-421-5p, miR-6123, miR-31-5p, miR-412-5p, miR-3431, miR-6238, miR-708-3p, miR-1285, miR-2113, miR-542-3p, miR-1434-3p, miR-450c-3p, miR-22-3p, miR-197-3p, novel\_23, miR-145a-5p, miR-21-5p, miR-138, miR-380-3p, miR-6240, let-7f-2-3p, let-7f-2-3p, miR-432-3p, miR-539-3p, let-7j, miR-296-3p, miR-224-5p, miR-377-3p, miR-296-3p, miR-330-3p, miR-105-5p, miR-365b-5p, novel\_51, miR-487a-3p, miR-3068-3p, miR-2285aa, miR-300-3p, miR-365a-3p, miR-324-5p, miR-376c-3p, miR-381-3p, miR-10b-3p, miR-329b, novel\_48, miR-671-5p, miR-485-5p, miR-1248, miR-3607-3p, miR-103b, miR-323-3p, miR-1197-3p, miR-374a-3p, miR-145-3p, miR-365a-5p, miR-34c-3p, miR-144, miR-138-5p, miR-410-3p, miR-374b-3p, miR-302a-5p, miR-450a-1-3p, miR-486-5p, miR-129-1-3p, miR-885-3p, miR-300, miR-582-3p, miR-105-2, miR-30c, miR-10a-5p, miR-29b-2-5p, miR-450c-5p, miR-376b-3p, miR-205-5p, miR-30f, miR-30c-2-3p, miR-3071-3p, miR-217, miR-17-3p, miR-152-3p, miR-10b, miR-2319b, miR-20a-3p, miR-2285u, miR-7977, miR-499a-3p, miR-3082-5p, miR-1185-2-3p, miR-376d, miR-378j, miR-129b-5p, miR-136-5p, miR-376a-3p, novel\_94, miR-1983, novel\_60, miR-3956-3p, miR-212-3p, miR-885-5p, miR-452-5p, miR-194b-5p, miR-423-5p, miR-2285n, miR-30b-5p, miR-382-3p, miR-101-3p, miR-371a-5p, miR-107-5p, miR-450a-5p, miR-3964, miR-374a-3p, miR-154-3p, miR-409b, miR-105-1, novel\_78, novel\_4, miR-2300a-5p, miR-548w, miR-330-3p, miR-145b, miR-1298-3p, miR-142-3p, miR-376b-3p, miR-9788-3p, miR-148b-5p, miR-216a-3p, miR-1185-3p, miR-10b, miR-2426, miR-17-3p, novel\_60, miR-3956-3p, miR-361-3p, miR-877-3p, miR-3959-3p, novel\_87, miR-218-5p, miR-101-3p, miR-374a-3p, miR-3964, miR-6119-3p, miR-206, miR-4792, miR-20a-3p, miR-452-3p, miR-203-3p, miR-146b-3p, miR-3596, miR-489, miR-374c-3p, miR-1306, miR-6516-3p, miR-6395, miR-450b-3p, miR-107, miR-2483-5p, miR-101b-3p, miR-654-3p, novel\_115, miR-431-5p, miR-1306-5p, miR-452-5p, miR-106b-3p, miR-145b, miR-103a-3p, miR-2300a-5p, miR-216a-3p, miR-6238, miR-194-3p, miR-103, miR-185-5p, miR-147a, miR-450c-3p, miR-1a-3p, miR-197-3p, miR-145a-5p, miR-374b-3p, miR-1434-3p, miR-101c, miR-2284aa, miR-450b-5p, miR-101a-5p, miR-3607-3p, miR-425-5p, miR-133a-3p, miR-374a-3p, miR-206-3p, miR-6740-5p, miR-409-3p, miR-450b-3p, miR-6516-3p, miR-17-3p, miR-487b-5p, miR-155-5p, miR-331-5p, miR-1277-3p, novel\_25, miR-155-5p, miR-374c-3p, miR-21a-3p, miR-331-5p, miR-450a-1-3p, novel\_99, miR-485-5p, miR-133b-3p, miR-1, miR-130a-5p, miR-107, miR-202-5p, miR-17-3p, miR-191-3p, miR-431, miR-548e-3p, miR-450a-1-3p, miR-2284z, miR-328-3p, miR-7859, miR-140-3p, miR-155-5p, novel\_73

TASP1 ENSOARGO(taspase, 3p, miR-103b, miR-323-3p, miR-1197-3p, miR-374a-3p, miR-145-3p, miR-365a-5p, miR-34c-3p, miR-144, miR-138-5p, miR-410-3p, miR-374b-3p, miR-302a-5p, miR-450a-1-3p, miR-486-5p, miR-129-1-3p, miR-885-3p, miR-300, miR-582-3p, miR-105-2, miR-30c, miR-10a-5p, miR-29b-2-5p, miR-450c-5p, miR-376b-3p, miR-205-5p, miR-30f, miR-30c-2-3p, miR-3071-3p, miR-217, miR-17-3p, miR-152-3p, miR-10b, miR-2319b, miR-20a-3p, miR-2285u, miR-7977, miR-499a-3p, miR-3082-5p, miR-1185-2-3p, miR-376d, miR-378j, miR-129b-5p, miR-136-5p, miR-376a-3p, novel\_94, miR-1983, novel\_60, miR-3956-3p, miR-212-3p, miR-885-5p, miR-452-5p, miR-194b-5p, miR-423-5p, miR-2285n, miR-30b-5p, miR-382-3p, miR-101-3p, miR-371a-5p, miR-107-5p, miR-450a-5p, miR-3964, miR-374a-3p, miR-154-3p, miR-409b, miR-105-1, novel\_78, novel\_4, miR-2300a-5p, miR-548w, miR-330-3p, miR-145b, miR-1298-3p, miR-142-3p, miR-376b-3p, miR-9788-3p, miR-148b-5p, miR-216a-3p, miR-1185-3p, miR-10b, miR-2426, miR-17-3p, novel\_60, miR-3956-3p, miR-361-3p, miR-877-3p, miR-3959-3p, novel\_87, miR-218-5p, miR-101-3p, miR-374a-3p, miR-3964, miR-6119-3p, miR-206, miR-4792, miR-20a-3p, miR-452-3p, miR-203-3p, miR-146b-3p, miR-3596, miR-489, miR-374c-3p, miR-1306, miR-6516-3p, miR-6395, miR-450b-3p, miR-107, miR-2483-5p, miR-101b-3p, miR-654-3p, novel\_115, miR-431-5p, miR-1306-5p, miR-452-5p, miR-106b-3p, miR-145b, miR-103a-3p, miR-2300a-5p, miR-216a-3p, miR-6238, miR-194-3p, miR-103, miR-185-5p, miR-147a, miR-450c-3p, miR-1a-3p, miR-197-3p, miR-145a-5p, miR-374b-3p, miR-1434-3p, miR-101c, miR-2284aa, miR-450b-5p, miR-101a-5p, miR-3607-3p, miR-425-5p, miR-133a-3p, miR-374a-3p, miR-206-3p, miR-6740-5p, miR-409-3p, miR-450b-3p, miR-6516-3p, miR-17-3p, miR-487b-5p, miR-155-5p, miR-331-5p, miR-1277-3p, novel\_25, miR-155-5p, miR-374c-3p, miR-21a-3p, miR-331-5p, miR-450a-1-3p, novel\_99, miR-485-5p, miR-133b-3p, miR-1, miR-130a-5p, miR-107, miR-202-5p, miR-17-3p, miR-191-3p, miR-431, miR-548e-3p, miR-450a-1-3p, miR-2284z, miR-328-3p, miR-7859, miR-140-3p, miR-155-5p, novel\_73

ZC3HAV1 ENSOARGO(zinc fin. 5p, miR-374b-3p, miR-1434-3p, miR-101c, miR-2284aa, miR-450b-5p, miR-101a-5p, miR-3607-3p, miR-425-5p, miR-133a-3p, miR-374a-3p, miR-206-3p, miR-6740-5p, miR-409-3p, miR-450b-3p, miR-6516-3p, miR-17-3p, miR-487b-5p, miR-155-5p, miR-331-5p, miR-1277-3p, novel\_25, miR-155-5p, miR-374c-3p, miR-21a-3p, miR-331-5p, miR-450a-1-3p, novel\_99, miR-485-5p, miR-133b-3p, miR-1, miR-130a-5p, miR-107, miR-202-5p, miR-17-3p, miR-191-3p, miR-431, miR-548e-3p, miR-450a-1-3p, miR-2284z, miR-328-3p, miR-7859, miR-140-3p, miR-155-5p, novel\_73

ABR

ENSOARGO(active B)

miR-2433, miR-29b-3p, miR-125b-5p, miR-331-3p, miR-6740-5p, miR-767-5p, miR-191-5p, miR-1260b, miR-18a, miR-767, miR-345-5p, miR-7144-5p, miR-1248, miR-615-5p, miR-1271, miR-125a, miR-34c-5p, miR-1260a, miR-125a-3p, miR-107, miR-3064-5p, miR-148b-5p, novel\_39, miR-3065-3p, miR-2285b, miR-1343-5p, miR-29d-3p, miR-885-3p, miR-2285ad, miR-6517, miR-18b-5p, miR-758-5p, miR-6516-5p, miR-129-1-3p, miR-502-5p, miR-34c, miR-128-1-5p, miR-29a, miR-656-5p, novel\_101, miR-29c-3p, miR-449a, miR-2428, miR-18b, miR-1306, miR-1291, miR-107, miR-9851-3p, miR-320b, miR-34b, miR-29a-3p, miR-503-5p, miR-330-3p, miR-194a, miR-378a-5p, miR-125a-5p, miR-1343-5p, miR-6240, miR-345-5p, miR-432, miR-145a-5p, novel\_23, miR-194-5p, miR-29b, miR-1260b, miR-4508, miR-103a-3p, miR-432-5p, miR-2285g, miR-503-5p, miR-185-5p, miR-149-5p, miR-103, miR-544b, miR-29d-5p, miR-320e, miR-665, miR-874-5p, miR-4492, miR-129-2-3p, miR-214, miR-29c-5p, miR-122-5p, miR-21a-3p, miR-2285c, miR-18a-5p, miR-345-5p, miR-885-3p, miR-1895, miR-1827, miR-2331-3p, miR-504-5p, miR-221-5p, miR-3065-3p, miR-552-3p, miR-296-3p, miR-182-5p, miR-544-3p, miR-6516, miR-877-5p, novel\_17, miR-324-3p, miR-185-3p, miR-92a-1-5p, miR-125b, miR-221-5p, miR-34b-5p, miR-2484, miR-21-3p, miR-503-5p, miR-191, miR-2300b-3p, miR-2904, miR-5703, miR-184-3p, miR-218-1-3p, miR-34a-5p, miR-3600, miR-212-5p, miR-383-5p, novel\_83, miR-532-3p, miR-2285n, miR-2285y, miR-194b-5p, miR-361-3p, miR-361-3p, miR-504, miR-3064-5p, miR-7977, miR-4443, miR-1306-5p, miR-182-5p, miR-3085-3p, miR-214-3p, miR-1388-3p, miR-2330-5p, miR-296-5p, miR-544a, miR-101c, miR-330-3p, miR-145b, miR-1298-3p, miR-2285e

miR-210-5p, miR-30b, miR-422a, miR-760-3p, miR-320d, miR-30d, miR-3653-3p, miR-376c-3p, miR-380-3p, miR-2432, miR-2411, miR-146a-5p, miR-2408, miR-2300b-3p, novel\_133, miR-378i, miR-30c-5p, miR-217-5p, miR-378a-3p, miR-188-3p, miR-5703, miR-4429, novel\_73, miR-2284u, miR-133a-3p, miR-18a-3p, miR-485-3p, miR-3600, miR-380-5p, miR-200b, miR-23c, miR-487a-3p, miR-23b-3p, miR-2285j, miR-320e, miR-338-5p, miR-29b-2-5p, miR-655-3p, miR-151-3p, miR-6516-3p, miR-155-5p, miR-190a-5p, miR-129-2-3p, miR-3074-5p, miR-145a-3p, miR-378c, miR-224-5p, miR-6134, miR-30d-5p, miR-655, miR-30f, let-7g-3p, miR-133b-3p, novel\_99, miR-140-5p, miR-378a-3p, miR-182-5p, miR-216b-3p, miR-370-5p, miR-499b-3p, miR-155-5p, miR-204-3p, novel\_103, miR-1306-5p, miR-320b, miR-182-5p, miR-3955-3p, miR-3085-3p, miR-146b, miR-494-3p, miR-1388-3p, miR-676-3p, miR-23a-3p, miR-378d, miR-1b-5p, miR-541, miR-484, miR-378b, miR-450b-5p, miR-1388-5p, miR-378c, miR-151a-3p, miR-1298-3p, miR-9788-3p, miR-30b-5p, miR-3964, miR-541-3p, miR-2447, miR-3059-5p, miR-190b-5p, miR-452-5p, miR-361-3p, miR-136-5p, miR-1983, miR-2319b, miR-2284g, miR-3064-5p, miR-7689-3p, miR-2483-3p, miR-378e, miR-499a-3p, miR-454-5p, miR-200c, miR-205-5p, miR-217, miR-30f, miR-127-5p, miR-200c-3p, novel\_127, miR-3529-3p, miR-4286, miR-495-5p, miR-29b-2-5p, miR-3064-5p, miR-192-3p, miR-2284y, miR-29a-5p, miR-1290, miR-23b-5p, miR-30a-5p, let-7a-2-3p, miR-30c, miR-200b-3p, miR-155-5p, miR-429-3p, miR-2285ad, miR-483-3p, miR-378h, miR-2411-5p, miR-129-1-3p, miR-370-5p, miR-5100, novel\_9, miR-133a-3p, miR-6128, miR-3607-3p, miR-1197-3p, miR-378c, miR-30e-5p, miR-23b, miR-320a, miR-3154, let-7g-3p, miR-23a-5p, miR-3068-3p, miR-874-3p, miR-1271, miR-370-3p, miR-2355-5p, miR-3965, miR-376c-3p, miR-146a, miR-224-5p, miR-2331-5p, novel\_51, miR-190a, miR-483-3p, miR-126a-

miR-378d, miR-848b, miR-23a-3p, miR-744-3p, miR-2284b, miR-199b-5p, miR-153-3p, miR-103a-2-5p, miR-323b-3p, miR-16b, miR-425-3p, miR-153, miR-148b-5p, miR-455-3p, novel\_78, miR-548w, miR-1343-3p, miR-330-3p, miR-1388-5p, miR-21b, miR-2284r, miR-301b-5p, miR-323b, miR-758-3p, miR-877-3p, miR-2447, miR-3956-3p, miR-2284j, miR-9-5p, miR-3968, miR-490-5p, miR-218-5p, miR-301a-5p, miR-378g, miR-2483-3p, miR-2284g, miR-2285u, miR-211-5p, miR-504, miR-221, miR-421-5p, miR-377-5p, miR-486-3p, miR-2285w, miR-195a-3p, miR-345-3p, novel\_17, miR-324-3p, miR-3601, miR-345-3p, miR-422a, miR-23b-3p, miR-23c, miR-2284h-5p, miR-328-3p, miR-18a-3p, miR-161-3p, miR-148a-5p, miR-2284u, miR-191, miR-378i, miR-193b-5p, miR-378a-3p, miR-217-5p, miR-769-5p, miR-6525, miR-224-5p, miR-346, miR-3184-3p, miR-3074-5p, miR-3958-5p, miR-874-5p, miR-130b-5p, miR-151-3p, miR-665, miR-377-3p, miR-10a, miR-15b-5p, miR-504-5p, miR-216b-3p, miR-339b, miR-1895, miR-450a-1-3p, miR-129b-3p, miR-411, miR-655, miR-433-3p, miR-432-3p, miR-432-3p, miR-380-5p, miR-6240, miR-668-3p, miR-193a-3p, miR-7-5p, miR-582, miR-377-3p, miR-296-3p, miR-365b-5p, miR-2285v, miR-2411-3p, miR-3431, miR-134-3p, miR-31-5p, miR-339-5p, miR-16b, miR-16-1-3p, miR-497-5p, miR-542-3p, miR-7b-5p, miR-1843b-5p, miR-450c-3p, novel\_23, miR-374c-5p, miR-199b-5p, miR-193b-3p, miR-29c-3p, miR-29a, miR-374c-3p, miR-320c, miR-3074-5p, miR-410-5p, miR-2319a, miR-378f, miR-150-5p, miR-3065-5p, miR-450b-5p, miR-200a, novel\_39, miR-2284y, miR-127-5p, novel\_127, miR-9-5p, miR-505-5p, miR-322-5p, miR-2284z, miR-450a-1-3p, miR-486-5p, miR-2285ad, miR-429-3p, novel\_79, miR-1224-5p, miR-23b-5p, miR-1260b, miR-2284v, miR-16-5p, miR-191-5p, miR-2284k, miR-100-3p, miR-1271, miR-1248, miR-200a-5p, miR-2284h, miR-758-3p, miR-124-5p, miR-33a-5p, miR-652-5p, miR-503-3p, let-7a-5p, miR-130b-5p, miR-363-5p, miR-483-3p, miR-378a-5p, miR-214-3p, let-7e, miR-362-3p, novel\_51, miR-2284d, miR-134-3p, miR-185-5p, miR-1298-3p, let-7g-5p, miR-216a-3p, miR-149-5p, miR-194-3p, miR-455-3p, miR-1343-3p, miR-27a-3p, miR-26b-3p, miR-2284ab, miR-362-3p, miR-30b-3p, miR-329-3p, miR-541, miR-30b-3p, miR-541-3p, miR-9-5p, miR-495-3p, miR-4726-5p, miR-499a-5p, miR-2285t, miR-4324, let-7i, miR-378g, miR-411b-3p, let-7d-5p, miR-6535, miR-27a-3p, novel\_68, let-7e-5p, miR-216a-3p, let-7g, novel\_39, miR-183-5p, miR-4286, miR-2898, miR-2284m, miR-127-5p, let-7f-5p, miR-98-5p, let-7k, miR-21-3p, miR-205-5p, miR-125a-3p, let-7c-5p, miR-24-2-5p, miR-9-5p, miR-483-3p, miR-6517, miR-196a-2-3p, let-7d, miR-128-3p, miR-362-3p, miR-1961, miR-2904, miR-1197-5p, miR-1197-3p, let-7b-5p, miR-6134, novel\_42, let-7b, miR-4510, miR-214, novel\_9, miR-874-5p, miR-4492, miR-130b-5p, miR-15b-3p, let-7f, miR-2433, miR-2284k, miR-5100, miR-324-3p, miR-6130, miR-2284n, let-7i-5p, miR-370-3p, miR-2355-5p, miR-1271, miR-329a

EEF2

ENSOARGO(eukaryot

MEIS3

ENSOARGO(Meis hom



miR-320b, miR-677, miR-320c, miR-181b-3p, miR-299b-3p, miR-411b-3p, miR-34b, miR-146b-5p, miR-6516-3p, miR-378f, miR-376a-2-5p, miR-450b-3p, miR-219b-3p, novel\_27, miR-449a, miR-374c-5p, miR-34c, miR-4324, miR-28c, miR-656-5p, miR-147-5p, miR-502b, miR-128-1-5p, novel\_1, miR-379-3p, miR-339-5p, miR-3955-5p, miR-31-5p, miR-133b-5p, miR-185-5p, miR-134-3p, miR-3431, miR-450c-3p, miR-145a-5p, novel\_23, miR-873a-5p, miR-223-3p, miR-1285, miR-668-3p, miR-345-5p, miR-654-3p, miR-365b-5p, miR-105-5p, let-7d-3p, miR-224-5p, miR-146a, miR-452-5p, miR-125a-5p, miR-2285aa, miR-542-5p, miR-125a, miR-141-3p, miR-34c-5p, miR-137-3p, miR-320a, miR-7144-5p, miR-485-5p, miR-345-5p, miR-6128, miR-193a-5p, miR-365a-5p, miR-378c, miR-125b-5p, miR-6740-5p, novel\_63, miR-5100, miR-486b-3p, novel\_79, miR-376a-5p, miR-431, miR-299a-3p, miR-582-3p, miR-450a-1-3p, miR-9-5p, miR-378h, miR-218-2-3p, miR-2427, miR-1290, miR-105-2, miR-411-3p, miR-495-5p, miR-2284y, novel\_39, miR-2284a, miR-450b-5p, miR-28b, miR-24-2-5p, miR-30c-2-3p, miR-3071-3p, miR-339a, miR-376b-3p, novel\_96, miR-200a-3p, miR-2898, miR-191-3p, miR-7977, miR-24-1-5p, miR-139-5p, miR-2319b, miR-378g, miR-378e, miR-378j, miR-129b-5p, miR-140-5p, miR-452-5p, miR-9-5p, novel\_111, miR-2440, miR-181b-2-3p, miR-145b, miR-105-1, miR-216a-3p, miR-455-3p, miR-376b-3p, miR-1298-3p, miR-147a, miR-125b-2-3p, miR-378b, miR-484, miR-143-5p, miR-1388-5p, miR-378c, miR-2284b, miR-30c-1-3p, miR-378d, miR-320b, miR-431-5p, miR-146b, miR-491-5p, miR-3955-3p, miR-30c-1-3p, miR-378a-3p, miR-548o-3p, novel\_25, miR-139-5p, miR-216b-5p, miR-6130, miR-411, miR-655, miR-21a-3p, miR-450a-1-3p, miR-625-5p, miR-1827, novel\_99, miR-345-5p, miR-339b, miR-665-5p, miR-433-5p, miR-378c, miR-3184-3p, miR-4510, miR-122-5p, miR-224-5p, miR-320a, miR-655-3p, miR-2285i, miR-15b-3p, miR-129-

VGLL1

ENSOARGO(vestigia

miR-671-5p, miR-485-5p, miR-20b-5p, miR-329b, miR-10b-3p, miR-17-5p, miR-200a-5p, miR-137-3p, miR-93-5p, miR-2448-3p, miR-488-3p, miR-324-5p, miR-34c-5p, miR-141-3p, miR-138-5p, miR-409-3p, miR-29b-3p, miR-410-5p, miR-365a-5p, miR-1260b, miR-93, miR-200b-3p, miR-885-3p, miR-29d-3p, miR-1290, miR-615-3p, miR-1271-5p, miR-6516-5p, miR-9-5p, miR-505-5p, novel\_79, miR-429-3p, miR-200a-3p, miR-107, miR-181b-5p, miR-200c-3p, miR-339a, miR-200c, miR-1260a, miR-200a, miR-450b-5p, miR-4286, miR-3064-5p, miR-30a-3p, miR-3529-3p, miR-19a-3p, miR-107, miR-3065-5p, miR-29a-3p, miR-411b-3p, miR-34b, miR-3120-3p, miR-378b, miR-147-5p, miR-625-3p, miR-29a, miR-1307-5p, miR-34c, miR-20a-5p, miR-502-5p, miR-301b-3p, miR-2428, miR-449a, miR-29c-3p, miR-495-3p, miR-2285x, miR-7862, miR-188-5p, miR-1260b, miR-138, miR-29b, miR-3071-5p, miR-1843b-5p, miR-7b-5p, miR-181a-5p, miR-432, miR-544b, miR-103, miR-20b, miR-3431, miR-134-3p, miR-432-5p, miR-130a-3p, miR-339-5p, miR-122-3p, miR-103a-3p, miR-31-5p, miR-17-5p, novel\_51, miR-106a-5p, miR-365b-5p, miR-7-5p, miR-22841, miR-668-3p, miR-130b-5p, miR-186-5p, miR-885-3p, miR-543-3p, miR-339b, let-7g-3p, miR-129b-3p, miR-21a-3p, miR-139-5p, miR-6516, miR-544-3p, miR-301a-3p, miR-132-5p, miR-130b-5p, miR-4492, miR-454-3p, miR-665, miR-132-5p, miR-30a-3p, miR-30e-3p, miR-2285j, miR-6134, miR-181c-5p, novel\_44, miR-142a-5p, miR-214, miR-1271, miR-34a-5p, miR-19b-3p, miR-33b-3p, miR-532-3p, miR-200b, miR-383-5p, miR-95-3p, miR-30d-3p, miR-106a, miR-548e-3p, miR-21-3p, miR-34b-5p, miR-106a, novel\_17, miR-2432, miR-376a-5p, miR-20a, miR-96-5p, miR-361-3p, miR-4443, miR-3596, miR-378g, miR-2285u, miR-139-5p, miR-3064-5p, miR-2285t, miR-615, novel\_82, miR-218-5p, miR-181d-5p, miR-9-5p, miR-16-2-3p, miR-450b-5p, miR-2426, miR-544a, miR-142-5p, miR-6529a, miR-148b-5p, miR-455-3p, miR-142-3p, miR-200a-3p, miR-204-3p, novel\_4, miR-2447, miR-4792, miR-141-3p, miR-2355-5p

miR-148a-5p, miR-1343-5p, miR-378a-3p, miR-378i, novel\_133, miR-2366, miR-328-3p, miR-378h, miR-2411-5p, novel\_79, miR-200a-3p, novel\_96, miR-181b-5p, miR-422a, miR-339a, miR-196a-3p, miR-210-5p, miR-199a-5p, miR-2411, miR-148b-5p, miR-29b-1-5p, miR-29b-2-5p, miR-345-3p, miR-181a-2-3p, miR-339b, miR-199a-5p, miR-499b-3p, miR-132-5p, miR-6130, miR-370-3p, miR-141-3p, miR-378a-3p, miR-132-5p, miR-665, miR-29b-2-5p, miR-378c, miR-181c-5p, miR-6525, miR-425-5p, miR-378c, miR-4510, miR-378c, miR-450b-5p, miR-873a-5p, miR-378b, miR-296-5p, miR-181a-5p, miR-149-5p, miR-148b-5p, miR-185-5p, miR-339-5p, miR-199b-5p, miR-452-5p, miR-1343-5p, miR-491-5p, miR-378a-5p, miR-29b-1-5p, miR-2957, miR-8485, miR-378d, miR-378f, miR-6395, miR-1291, miR-136-5p, miR-361-3p, miR-199b-5p, miR-499a-3p, miR-378e, miR-3596, miR-489, miR-425-5p, miR-199b-5p, miR-877-3p, miR-3957-3p, miR-495-3p, miR-181d-5p, miR-885-5p

KIF13A ENSOARGO(kinesin)

SERF2 ENSOARGO( small ED)

ZDHC7 ENSOARGO(zinc fin)

miR-143-5p, miR-450b-5p, miR-2300a-5p, novel\_4, miR-27a-3p, miR-142-3p, miR-500-5p, miR-326, miR-320b, miR-342, miR-2957, miR-362-3p, miR-3085-3p, miR-494-3p, miR-424-5p, miR-2330-5p, miR-30c-1-3p, miR-361-3p, miR-129b-5p, miR-877-3p, novel\_94, miR-20a-3p, miR-3064-5p, miR-27a-3p, miR-454-5p, miR-769-5p, miR-1973, miR-371a-5p, miR-335, miR-541-3p, novel\_60, miR-3059-5p, miR-452-5p, miR-181d-5p, miR-362-5p, miR-362-3p, miR-2408, miR-2300b-3p, miR-1197-5p, miR-5703, miR-1193, miR-2904, miR-4429, miR-3600, miR-148b-3p, miR-200b, miR-15a-5p, miR-222-5p, miR-532-3p, miR-196a-3p, miR-185-3p, miR-466i-5p, miR-760-3p, miR-320d, miR-21-3p, miR-221-5p, miR-216c-5p, miR-21a-3p, miR-27b-5p, miR-582-5p, miR-221-5p, miR-532-5p, miR-323-5p, miR-324-3p, miR-664a, miR-208b-5p, miR-424-5p, miR-145a-3p, miR-3074-2-3p, miR-6134, miR-181a-5p, miR-873a-5p, miR-145a-5p, miR-219a-1-3p, miR-1260b, miR-138, miR-744-5p, miR-133b-5p, miR-26b-3p, miR-377-5p, miR-665, miR-185-5p, miR-2284d, miR-103, miR-2355-3p, miR-2483-5p, miR-2387, miR-18a-3p, miR-21c, miR-107, miR-1291, miR-379-5p, miR-195a-5p, miR-135b-5p, miR-320b, miR-323a-5p, miR-2404, miR-15a, miR-16a, novel\_1, miR-203b-5p, miR-22-5p, miR-342-3p, miR-24-3p, miR-371b-3p, miR-211, miR-2428, miR-326-3p, miR-218-2-3p, miR-582-3p, let-7a-2-3p, miR-200b-3p, miR-128-3p, miR-214-5p, miR-582-3p, miR-200c, miR-1260a, miR-30c-2-3p, miR-200c-3p, miR-181b-5p, miR-107, miR-4286, miR-30a-3p, miR-2385-3p, miR-1271-3p, miR-2284a, miR-376c-5p, miR-488-3p, miR-362-5p, miR-3154, miR-320a, novel\_91, let-7g-3p, miR-10b-3p, miR-485-5p, miR-7144-5p, miR-23a-5p, miR-370-3p, miR-769, miR-410-5p, miR-1-5p, miR-138-5p, miR-204-5p, miR-3607-3p, miR-500b-5p, miR-145-3p, miR-541, miR-329-3p, miR-2284r, miR-362-3p, miR-1839-5p, miR-101c, novel\_78, miR-145b, miR-181b-2-3p, miR-2450, miR-421, miR-455-3p, miR-

TEX36

ENSOARGO(testis e.

miR-196b-5p, miR-125a-5p, miR-7-5p, miR-194a, miR-345-5p, miR-493-5p, miR-101-5p, miR-29b, miR-7b-5p, miR-181a-5p, miR-194-5p, novel\_23, miR-145a-5p, miR-185-5p, miR-412-5p, miR-2355-3p, miR-133b-5p, miR-130a-3p, miR-379-3p, miR-29a, miR-301b-3p, miR-1a-1-5p, novel\_120, miR-495-3p, miR-29c-3p, miR-19a-3p, miR-6516-3p, miR-148a-3p, miR-216a-3p, miR-29a-3p, miR-323a-5p, miR-6535, miR-7-1-3p, miR-655-5p, miR-1a-2-5p, miR-181b-5p, miR-152-3p, novel\_96, miR-2285af, miR-30f, miR-2285b, miR-1957a, miR-29b-2-5p, miR-411-3p, miR-30c, miR-128-3p, miR-196a-5p, miR-30a-5p, miR-29d-3p, miR-1271-5p, miR-302a-5p, miR-545-5p, miR-494-5p, miR-29b-3p, novel\_63, miR-1-5p, miR-125b-5p, miR-133a-3p, let-7g-3p, miR-345-5p, miR-424-3p, miR-30e-5p, miR-376c-3p, miR-125a, miR-130b-3p, miR-491-5p, miR-153-3p, miR-2957, miR-29b-1-5p, miR-1b-5p, miR-193a, miR-8485, miR-124a, miR-744-3p, miR-21b, miR-143-5p, miR-153, miR-145b, miR-499a-5p, miR-30b-5p, miR-154a, miR-7705, miR-885-5p, miR-3059-5p, miR-181d-5p, miR-194b-5p, miR-96-5p, miR-493-5p, miR-2483-3p, miR-652-3p, miR-4792, miR-541-5p, miR-3653-3p, miR-30d, miR-30b, miR-125b, miR-376c-3p, miR-29b-1-5p, miR-2285w, miR-216c-5p, miR-345-3p, miR-195a-3p, miR-19b-3p, miR-30c-5p, miR-188-3p, miR-98-3p, miR-124-3p, miR-148b-3p, miR-2284h-5p, miR-451a, miR-454-3p, miR-29b-2-5p, miR-98-3p, miR-6525, miR-181c-5p, miR-145a-3p, miR-433-5p, miR-1271, miR-30f, miR-345-5p, let-7g-3p, miR-133b-3p, miR-487b-5p, miR-411, miR-30d-5p, miR-323-5p, miR-301a-3p, miR-376e-3p

miR-200b, miR-148b-3p, miR-199a-3p, miR-532-3p, miR-3600, miR-184-3p, miR-4429, miR-142-3p, miR-361-5p, miR-2284u, miR-16-1-3p, miR-2366, miR-191, novel\_133, miR-1197-5p, miR-217-5p, miR-188-3p, miR-124-3p, miR-181b-1-3p, miR-125b-2-3p, miR-142a-3p, miR-130a-5p, miR-664b-3p, miR-143-3p, miR-380-3p, miR-2424, miR-146a-5p, miR-183-5p, miR-216c-5p, miR-2887, miR-345-3p, miR-202-5p, miR-2284m, miR-1277-5p, miR-196a-3p, miR-125b, miR-216a-5p, miR-139-5p, miR-377-3p, miR-27a-5p, miR-204-3p, miR-504-5p, miR-552-3p, novel\_99, miR-1827, miR-186-5p, miR-625-5p, miR-433-3p, miR-224-5p, miR-6525, miR-142a-5p, miR-338-3p, miR-3184-5p, miR-3184-3p, miR-214, miR-17-3p, miR-451a, miR-130b-5p, miR-129-5p, miR-2285j, miR-320e, miR-142-3p, miR-142-5p, miR-1298-3p, miR-153, miR-1185-3p, miR-455-3p, miR-500-5p, novel\_78, miR-199b-3p, novel\_4, miR-181b-2-3p, miR-145b, miR-27a-3p, miR-5010-3p, novel\_156, ENSOARGO(chromosome 3p, miR-299a-5p, miR-2426, miR-2284aa, miR-541, miR-6529a, miR-484, miR-1b-5p, miR-491-3p, miR-8485, miR-1388-3p, miR-124a, miR-491-5p, miR-1185-5p, miR-103a-2-5p, miR-214-3p, miR-153-3p, miR-146b, miR-326, miR-320b, miR-199a-3p, miR-342, miR-27a-3p, miR-1185-2-3p, miR-144-5p, miR-20a-3p, miR-452-3p, miR-139-5p, miR-2284g, miR-499b-5p, miR-541-5p, miR-504, novel\_94, miR-544-5p, miR-877-3p, miR-9-3p, miR-1983, miR-362-5p, miR-877-3p, miR-423-5p, miR-1285-5p, miR-9-3p, miR-212-3p, miR-3956-3p, miR-541-3p, novel\_60, miR-2447, miR-3059-5p, miR-2284j, miR-452-5p, miR-2440, miR-218-5p, miR-107-5p, miR-758-5p, miR-2284z, miR-429-3p, miR-7641, let-7a-2-3p, miR-200b-3p, miR-3578, miR-330-5p, miR-450b-5p, miR-380-5p, miR-148b-5p, miR-490-3p, miR-2284a, miR-2284y, miR-376c-5p, miR-3529-3p, miR-4286, miR-181a-2-3p, miR-495-5p, miR-200c-3p, miR-17-3p, miR-200a-3p, novel\_96, miR-152-3p, miR-200c, miR-2285af, miR-217, miR-374c-3p, miR-2284n, miR-

ATG5

ENSOARGO( autophag

miR-15b-5p, miR-6516, miR-34c-5p, miR-3959-5p, miR-769, miR-216b-3p, miR-221-5p, miR-625-5p, miR-20b-5p, miR-2312, miR-2318, miR-329b, miR-129b-3p, miR-30d-5p, miR-17-5p, miR-3154, miR-21a-3p, miR-30e-5p, miR-2285c, miR-2448-3p, miR-181c-5p, miR-769-5p, miR-3607-3p, miR-16-5p, miR-424-5p, novel\_74, miR-17-3p, miR-3604, miR-1-5p, miR-2332, miR-322-5p, miR-483-3p, miR-6516-5p, miR-758-5p, miR-15a-5p, miR-380-5p, miR-2285ad, miR-106a, miR-128-3p, miR-2284u, miR-34a-5p, miR-300, miR-142-3p, miR-30a-5p, miR-140-3p, miR-30c-5p, miR-3591-5p, miR-2424, miR-2284y, miR-192-3p, miR-2284a, miR-380-5p, miR-125b-2-3p, miR-181b-1-3p, miR-20a, miR-329a-5p, miR-183-5p, miR-34b-5p, miR-30d, miR-221-5p, miR-107, miR-17-3p, miR-106a, miR-202-5p, miR-1a-2-5p, miR-181b-5p, miR-500a-5p, miR-6535, miR-677, miR-181b-3p, miR-1185-2-3p, miR-34b, miR-374c-3p, miR-3120-3p, miR-2284g, miR-329-5p, miR-195a-5p, miR-107, miR-216a-3p, miR-129b-5p, miR-2285ab, miR-1285-5p, novel\_27, miR-449a, miR-371b-3p, miR-2285f, miR-758-5p, miR-17-3p, miR-181d-5p, miR-1a-1-5p, miR-203b-5p, miR-769-5p, miR-16a, miR-34c, miR-33a-3p, miR-15a, miR-4324, miR-133a-5p, miR-20a-5p, miR-2440, miR-194-3p, miR-1185-3p, miR-103, miR-2285e, miR-2285g, miR-181b-2-3p, miR-548w, novel\_78, miR-133b-5p, miR-103a-3p, miR-497-5p, miR-101c, miR-16b, novel\_23, miR-1434-3p, miR-181a-5p, miR-654-3p, miR-101-5p, miR-2284b, miR-380-5p, miR-106a-5p, miR-424-5p, miR-483-3p, miR-106a-5p, miR-16b, miR-106b-5p, miR-17-5p

miR-16b, miR-199a-3p, miR-320b, miR-1306-5p, miR-146b, miR-1468, miR-3085-3p, let-7c-3p, miR-33a-5p, miR-424-5p, miR-8485, miR-758-3p, miR-30c-1-3p, miR-7857, miR-758-3p, miR-296-5p, miR-143-5p, miR-541, miR-3120-5p, miR-5010-3p, miR-181b-2-3p, novel\_78, miR-409b, miR-1343-3p, miR-2300a-5p, miR-455-3p, miR-421, miR-2459, miR-142-3p, miR-2285n, miR-3958-3p, miR-541-3p, miR-423-5p, miR-7705, miR-219a-2-3p, miR-877-3p, miR-361-3p, miR-378j, miR-361-3p, miR-504, miR-136-5p, miR-3064-5p, miR-452-3p, miR-3596, miR-324-3p, miR-92a-1-5p, miR-185-3p, miR-210-5p, novel\_17, miR-299-3p, miR-320d, miR-760-3p, miR-183-5p, miR-216c-5p, miR-2432, miR-146a-5p, miR-380-3p, miR-143-3p, miR-376a-5p, miR-181b-1-3p, miR-142a-3p, miR-2904, miR-1197-5p, miR-140-3p, miR-2300b-3p, miR-2366, miR-218-1-3p, miR-4429, miR-33b-3p, miR-505-3p, miR-212-5p, miR-616-3p, novel\_83, miR-199a-3p, miR-222-5p, miR-15a-5p, miR-200b, miR-324-3p, miR-219b-3p, miR-665, miR-3604, miR-320e, miR-4492, miR-874-5p, miR-208b-5p, miR-424-5p, miR-450b-3p, miR-664a, miR-3074-5p, miR-4510, miR-145a-3p, miR-3184-5p, miR-6525, miR-129b-3p, miR-450a-1-3p, miR-625-5p, miR-1827, miR-18a-5p, miR-504-5p, miR-30c-1-3p, miR-660-5p, miR-15b-5p, miR-6130, novel\_51, miR-146a, miR-660, miR-1343-5p, miR-2285l, miR-503-3p, miR-654-3p, miR-450c-3p, miR-374b-3p, miR-497-5p, miR-188-5p, miR-16b, miR-380-3p, miR-1260b, miR-149-5p, miR-3431, miR-16a, novel\_87, miR-4324, miR-15a, miR-576-3p, miR-28c, miR-502b, miR-6119-3p, novel\_1, miR-136-3p, miR-2428, miR-1306, miR-150-5p, miR-18b, miR-146b-5p, miR-195a-5p, miR-505-3p, novel\_68, miR-378b, miR-3074-5p, miR-677, miR-320c, miR-669, miR-181b-3p, miR-146b-3p, miR-374c-3p, miR-670-3p, miR-299b-3p, miR-30c-2-3p, miR-1260a, miR-219-3p, miR-200c, miR-200c-3p, miR-3064-5p, miR-181a-2-3p, miR-29a-5p, miR-190-3p, miR-192-3p, miR-1271-3p, miR-217, miR-4726-5p, miR-668-3p, miR-2285f, miR-219a-5p, miR-346, miR-423-5p, miR-3184-5p, miR-2285ab, miR-433-3p, miR-217-5p, miR-5703, miR-2312, miR-668-5p, miR-625-5p, miR-20a-3p

miR-143-5p, miR-484, miR-296-5p, miR-378b, miR-30b-3p, miR-7857, miR-2426, miR-544a, miR-378c, miR-2300a-5p, miR-500-5p, miR-1306-5p, miR-326, miR-342, miR-362-3p, miR-3085-3p, let-7e, miR-424-5p, miR-382-3p, miR-2330-5p, let-7a-5p, miR-129b-5p, novel\_94, miR-452-3p, miR-20a-3p, miR-3064-5p, miR-3082-5p, miR-378e, let-7d-5p, miR-30b-5p, miR-4726-5p, miR-3958-3p, novel\_60, miR-194b-5p, miR-362-5p, miR-502-3p, miR-362-3p, miR-215-5p, miR-2300b-3p, novel\_133, miR-5703, miR-1193, miR-2904, miR-941, miR-19b-3p, miR-3960, miR-3600, miR-1b-3p, miR-15a-5p, miR-383-5p, novel\_83, miR-199a-3p, miR-532-3p, miR-299-3p, miR-34b-5p, miR-30d, miR-216c-5p, miR-130a-5p, miR-27b-5p, miR-30f, miR-18a-5p, miR-133b-3p, miR-378a-3p, miR-6130, miR-323-5p, miR-139-5p, miR-544-3p, miR-192-5p, miR-27a-5p, miR-877-5p, miR-22-3p, novel\_32, miR-204-3p, miR-664a, miR-17-3p, miR-450b-3p, miR-708-5p, miR-424-5p, miR-4510, miR-378c, miR-2330-3p, miR-425-5p, miR-206-3p, let-7b-5p, miR-3071-5p, miR-194-5p, miR-30b-3p, miR-138, miR-133b-5p, miR-185-5p, miR-503-5p, let-7g-5p, miR-432-5p, miR-544b, miR-503-5p, miR-363-5p, miR-2483-5p, miR-345-5p, miR-18b, miR-2387, miR-2285k, miR-19a-3p, miR-450b-3p, miR-195a-5p, miR-379-5p, miR-655-5p, miR-34b, miR-323a-5p, miR-6402, miR-133a-5p, miR-502-5p, miR-15a, let-7i, miR-34c, miR-16a, miR-92a-3p, miR-502b, miR-342-3p, miR-495-3p, novel\_101, miR-17-3p, miR-3959-3p, miR-2428, miR-326-3p, miR-449a, miR-3578, miR-30a-5p, miR-501-3p, let-7d, miR-411-3p, miR-105-2, miR-7641, miR-378h, let-7c-5p, miR-17-3p, miR-2898, miR-92a-3p, miR-3529-3p, miR-181a-2-3p, miR-2403, miR-1, miR-1271-3p, miR-2284a, miR-488-3p, miR-18a, miR-3154, miR-362-5p, miR-10a-3p, miR-485-5p, miR-7144-5p, miR-215-5p, miR-34c-5p, miR-3969, miR-331-3p, miR-138-5p, miR-28-5p, miR-486b-3p, miR-103b, miR-133a-3p, miR-500b, miR-542-3p, miR-3141, miR-1343-5p, miR-1306, miR-10b-3p, miR-96-5p, miR-1343-3p, miR-1271-5p, miR-6130, miR-1306-5p, miR-3141, miR-491-5p, miR-17-3p, miR-17-3p, miR-1343-5p, novel\_96, miR-543-5p, miR-4510, miR-1271, miR-17-3p, miR-376a-5p



miR-6134, miR-224-5p, miR-206-3p, miR-323-3p, miR-425-5p, miR-6128, miR-190a-5p, miR-767-5p, miR-6516-3p, miR-487b-5p, miR-151-3p, miR-144, miR-494-5p, miR-2284k, miR-34c-3p, miR-133c, miR-216b-5p, miR-139-5p, miR-374c-3p, miR-21-3p, miR-216b-3p, miR-548o-3p, miR-1814c, miR-3074-1-3p, novel\_48, let-7g-3p, miR-767, miR-487b-5p, miR-23b, miR-137-3p, miR-490-3p, miR-143-3p, miR-181b-1-3p, miR-148b-5p, miR-29b-1-5p, miR-450b-5p, miR-1, miR-152-3p, novel\_96, miR-2484, miR-2284m, miR-202-5p, novel\_17, miR-125a-3p, miR-2285p, miR-26a-5p, miR-376b-3p, miR-205-5p, miR-23c, miR-148b-3p, miR-23b-3p, miR-383-5p, miR-505-5p, miR-376a-5p, miR-1224-5p, miR-3600, miR-6517, miR-148a-5p, miR-361-5p, miR-142-3p, miR-501-3p, miR-2904, miR-2366, miR-502-3p, miR-8095, miR-2284j, miR-190b-5p, miR-2285f, miR-885-5p, miR-541-3p, miR-219b-3p, miR-206, miR-499a-5p, miR-628-3p, miR-107-5p, miR-425-5p, miR-382-5p, miR-6402, miR-500-3p, miR-181b-3p, miR-376d, miR-144-3p, miR-677, miR-26b-5p, miR-541-5p, miR-139-5p, miR-877-3p, miR-544-5p, miR-376a-3p, miR-376b-3p, miR-3591-3p, miR-409-5p, miR-148a-3p, miR-2285ab, miR-2310, let-7a-2-3p, miR-654-3p, miR-2285r, miR-101-5p, miR-23a-3p, miR-6240, miR-1388-3p, miR-103a-2-5p, miR-491-5p, miR-190a, miR-2957, miR-330-3p, miR-29b-1-5p, miR-224-5p, miR-411-5p, miR-148b-5p, miR-376b-3p, miR-181b-2-3p, miR-26b-3p, miR-151a-3p, miR-330-3p, miR-1a-3p, miR-501-3p, miR-143-5p, miR-542-3p, miR-1843b-5p, miR-541, miR-2113, miR-1434-3p

NCBP1 ENSOARGO(nuclear miR-7144-5p, miR-6529b, miR-2433

KIAA0232 ENSOARGO(KIAA0232

let-7b-5p, miR-6134, miR-338-3p, miR-145a-3p, miR-3074-2-3p, miR-664a, miR-6516-3p, miR-155-5p, miR-17-3p, miR-487a-5p, miR-324-3p, miR-19b-1-5p, miR-320e, novel\_25, miR-204-3p, miR-155-5p, miR-2312, miR-125b-2-3p, miR-146a-5p, miR-320d, miR-760-3p, miR-34b-5p, miR-30b-3p, miR-299-3p, miR-185-3p, miR-125b, miR-383-5p, miR-671-3p, miR-532-3p, miR-505-3p, miR-4429, miR-941, miR-378d, miR-2300b-3p, miR-2904, miR-124-3p, miR-5703, miR-1197-5p, miR-188-3p, miR-8095, miR-3059-5p, novel\_60, miR-2285f, miR-452-5p, miR-4726-5p, miR-450a-5p, miR-2285t, miR-107-5p, let-7d-5p, miR-3064-5p, miR-20a-3p, miR-452-3p, miR-541-5p, miR-369-5p, miR-30c-1-3p, let-7a-5p, miR-33a-5p, miR-376b, miR-3085-3p, let-7e, miR-320b, miR-326, miR-2957, miR-9788-3p, miR-2285e, miR-409b, miR-5010-3p, miR-450b-5p, miR-3120-5p, miR-484, miR-143-5p, miR-412-3p, miR-30b-3p, miR-323-3p, miR-365a-5p, miR-1306-5p, miR-138-5p, miR-34c-3p, miR-551b-3p, miR-3969, miR-34c-5p, miR-370-3p, miR-7144-5p, miR-671-5p, miR-488-3p, miR-320a, miR-3154, miR-28b, miR-1957a, miR-1271-3p, miR-495-5p, miR-2385-3p, miR-4286, miR-450a-2-3p, miR-2898, miR-17-3p, miR-543-5p, miR-1260a, miR-30c-2-3p, let-7c-5p, miR-24-2-5p, let-7d, miR-128-3p, miR-615-3p, miR-345-3p, miR-134, miR-24-3p, miR-449a, miR-326-3p, miR-2428, miR-17-3p, miR-203b-5p, miR-22-5p, miR-502-5p, miR-133a-5p, miR-34c, let-7i, miR-34b, miR-450b-3p, miR-9851-3p, miR-505-3p, miR-6516-3p, miR-2285ab, miR-18a-3p, miR-378b, miR-345-5p, miR-363-5p, miR-124-5p, miR-125a-5p, miR-1343-5p, miR-2285g, let-7g-5p, miR-377-5p, miR-26b-3p, miR-138, miR-30b-3p, miR-1260b, miR-7862, miR-744-5p, miR-3071-5p, miR-6525, miR-433-5p, let-7b, miR-3074-5p, miR-3958-5p, miR-665-5p, novel\_74, miR-4492, miR-500, let-7f, miR-664a-5p, miR-499b-3p, let-7i-5p, miR-30c-1-3p, miR-504-5p, miR-345-5p, miR-2285c, miR-500a-3p, miR-411, miR-376a-5p, miR-218-5p, novel\_82, miR-34c, novel\_111, miR-449a, miR-326-3p, miR-423-5p, miR-342-3p, miR-17-3p, novel\_101, miR-299b-5p, miR-136-5p, miR-7975, miR-877-3p, miR-378f, miR-505-3p, miR-3065-5p, miR-378e, miR-323a-5p, miR-34b, miR-299b-3p, miR-669, miR-3064-5p, miR-10b, miR-216b-3p, miR-499b-5p, miR-491-5p, miR-3085-3p, miR-342, miR-326, miR-377-3p, miR-505, miR-197-5p, miR-30c-1-3p, miR-432-3p, miR-378d, miR-8485, miR-363-5p, miR-33a-5p, miR-138, miR-378c, miR-219a-1-3p, miR-299a-5p, miR-4508, miR-2889, miR-378b, miR-223-3p, novel\_23, miR-147a, miR-421, miR-31-5p, novel\_4, miR-665, miR-222-5p, miR-138-5p, miR-17-3p, miR-4492, miR-874-5p, miR-486b-3p, miR-30e-3p, miR-331-3p, miR-30a-3p, miR-665, miR-3604, miR-3184-5p, miR-378c, miR-6134, miR-378c, miR-10b-3p, miR-885-3p, miR-1827, miR-1248, miR-21a-3p, miR-200a-5p, miR-377-3p, miR-376e-3p, miR-34c-5p, miR-323-5p, novel\_32, miR-376c-3p, miR-30c-1-3p, miR-378a-3p, miR-2285aa, miR-296-3p, miR-450a-2-3p, miR-17-3p, miR-466i-5p, miR-34b-5p, novel\_96, miR-299-3p, miR-196a-3p, novel\_17, miR-30c-2-3p, miR-92a-1-5p, miR-422a, miR-185-3p, miR-376c-3p, miR-486-3p, miR-3064-5p, miR-30a-3p, miR-885-3p, miR-133a-3p, miR-378d, miR-34a-5p, novel\_133, miR-378i, miR-378a-3p, miR-330-5p, miR-378h, miR-299a-3p, miR-1b-3p, miR-30d-3p, miR-505-3p

miR-148a-5p, miR-218-1-3p, miR-378a-3p, miR-193b-5p, miR-378i, miR-23c, miR-23b-3p, miR-7859, miR-422a, miR-324-3p, miR-26a-5p, novel\_17, miR-376c-3p, miR-376a-5p, miR-345-3p, miR-195a-3p, miR-503-5p, miR-186-5p, miR-339b, miR-411, miR-487b-5p, miR-500a-3p, miR-129b-3p, miR-15b-5p, miR-216b-5p, miR-376e-3p, miR-582-5p, miR-10a, miR-301a-3p, miR-552-3p, miR-548o-3p, miR-2331-3p, miR-130b-5p, miR-500, miR-874-5p, miR-454-3p, miR-487b-5p, miR-665, miR-3604, miR-151-3p, miR-2285j, miR-590-3p, miR-1839-5p, miR-362-3p, miR-1388-5p, miR-501-3p, miR-1a-3p, miR-329-3p, miR-148b-5p, miR-496-5p, miR-181b-2-3p, miR-103a-2-5p, miR-130b-3p, miR-16b, miR-431-5p, miR-378d, miR-23a-3p, miR-3963, miR-96-5p, miR-140-5p, miR-500-3p, miR-4443, miR-2483-3p, miR-2285u, miR-139-5p, miR-3964, miR-7705, novel\_111, miR-877-3p, miR-23b-5p, miR-330-5p, miR-1343-5p, miR-1290, novel\_121, miR-2284z, miR-758-5p, miR-322-5p, miR-431, novel\_79, miR-429-3p, miR-6517, miR-152-3p, miR-200a-3p, miR-28-3p, miR-30f, miR-2285b, miR-200a, novel\_39, miR-148b-5p, miR-450b-5p, miR-1248, miR-329a, miR-876-3p, miR-23b, miR-200a-5p, miR-137-3p, miR-331-5p, miR-301, miR-376c-3p, miR-331-5p, miR-300-3p, miR-2285aa, miR-503-3p, miR-574-5p, miR-331-5p, miR-494-5p, novel\_63, miR-2433, miR-1260b, miR-16-5p, miR-2284x, miR-497-5p, miR-16b, miR-197-3p, miR-1843b-5p, miR-7b-5p, miR-194-3p, miR-149-5p, miR-3431, miR-3535, miR-339-5p, miR-31-5p, novel\_51, miR-194a, miR-7-5p, miR-2284l, miR-2285r, miR-668-3p, miR-378f, miR-3065-5p, miR-1306, miR-148a-3p, miR-677, miR-144-3p, miR-374c-3p, miR-26b-5p, miR-3120-3p, miR-6123, miR-379-3p, miR-206, miR-576-3p, miR-4324, miR-301b-3p, miR-1197-5p, miR-188-3p, miR-5703, miR-2904, miR-362-3p, novel\_133, novel\_83, miR-148b-3p, miR-340-5p, miR-15a-5p, miR-200b, miR-383-5p, miR-548a-3p, miR-130a-5p, miR-216c-

miR-3071-5p, miR-145a-5p, miR-197-3p, miR-188-5p, miR-497-5p, miR-369-5p, miR-380-3p, miR-16b, miR-544b, miR-2284d, miR-2411-3p, miR-190a, miR-32, miR-224-5p, miR-363-5p, miR-380-5p, miR-432-3p, miR-2284l, miR-432-3p, miR-2285r, miR-18a-3p, miR-216a-3p, miR-135b-5p, miR-195a-5p, miR-450b-3p, miR-10a-5p, miR-329-5p, novel\_68, novel\_69, miR-34b, novel\_87, miR-34c, miR-16a, miR-6529b, miR-142b, miR-133a-5p, miR-15a, miR-6123, miR-22-5p, novel\_1, miR-92a-3p, miR-128-1-5p, novel\_101, miR-1193, miR-17-3p, miR-495-3p, miR-449a, miR-323c, miR-211, miR-30a-5p, miR-345-3p, miR-10a-5p, miR-128-3p, miR-411-3p, miR-431, miR-7641, miR-214-5p, miR-2284z, miR-758-5p, miR-322-5p, miR-505-5p, miR-219-3p, miR-92a-3p, novel\_127, miR-200a-3p, miR-17-3p, miR-450a-2-3p, miR-4286, miR-30a-3p, miR-490-3p, miR-3956-5p, miR-2284a, miR-2285b, miR-1271-3p, miR-200a, miR-3065-3p, miR-2284y, miR-92b-3p, miR-380-5p, miR-148b-5p, miR-3154, miR-200a-5p, miR-2448-3p, miR-301, miR-30e-5p, miR-1814c, miR-485-5p, miR-876-3p, miR-2474, miR-141-3p, miR-3068-3p, miR-376c-3p, miR-25-3p, miR-34c-5p, miR-135a-5p, miR-370-5p, miR-2284k, miR-34c-3p, miR-486b-3p, miR-204-5p, miR-3607-3p, miR-16-5p, miR-193a-5p, miR-2284v, miR-758-3p, miR-323b, miR-10b, miR-541, miR-101c, miR-2284aa, miR-450b-5p, miR-544a, miR-145b, miR-1343-3p, miR-2459, miR-455-3p, miR-1298-3p, miR-16b, miR-323b-3p, miR-431-5p, novel\_103, miR-199a-3p, miR-3955-3p, novel\_124, miR-2284b, miR-424-5p, miR-101b-3p, miR-2310, miR-758-3p, miR-3187-3p, miR-129b-5p, miR-409-5p, miR-140-5p, miR-211-5p, miR-499b-5p, miR-2284g, miR-2483-3p, miR-499a-3p, miR-2440, miR-101-3p, miR-382-3p, miR-30b-5p, miR-2285t, miR-190b-5p, miR-2284j, miR-541-3p, miR-363-3p, miR-2447, miR-219a-2-3p, miR-423-5p, novel\_111, miR-877-3p, miR-140-3p, miR-188-3p, miR-1102, miR-30c-5p, miR-34a-5p, miR-184-3p, miR-4429, miR-29d-3p, miR-217-5p, miR-362-3p, miR-2300b-3p, miR-532-3p, miR-210-3p, miR-107, miR-92a-3p, miR-320d, miR-6536, miR-760-3p, miR-127-5p, miR-217, miR-185-3p, miR-92a-1-5p, miR-486-3p, miR-146a-5p, miR-92b-3p, miR-28b, miR-148b-5p, miR-181a-2-3p, novel\_48, miR-767, miR-329a, miR-320a, miR-488-3p, miR-424-3p, miR-22-3p, miR-377-3p, miR-25-3p, miR-323-5p, miR-6130, miR-32-5p, miR-708-5p, miR-31-3p, miR-4492, miR-486b-3p, miR-28-5p, miR-767-5p, miR-320e, miR-29b-3p, miR-410-5p, miR-3184-5p, miR-122-5p, miR-6134, miR-214, miR-4510, miR-1839-5p, miR-6239, miR-3120-5p, miR-27b-3p, miR-455-5p, miR-29b, miR-362-3p, miR-30b-3p, miR-22-3p, miR-30b-3p, miR-3071-5p, miR-329-3p, miR-143-5p, miR-301b-5p, miR-103, miR-421, miR-222-5p, miR-27a-3p, miR-103a-3p, miR-199b-3p, miR-146b, miR-214-3p, miR-124-5p, novel\_124, miR-3141, miR-32, miR-362-3p, miR-455-5p, miR-320b, miR-342, miR-377-3p, miR-146a, miR-4532, miR-146b-5p, miR-107, miR-3141, miR-320c, miR-27a-3p, miR-323a-5p, miR-29a-3p, miR-20a-3p, miR-22-5p, miR-3964, miR-656-5p, miR-199c, miR-92a-3p, miR-4726-5p, miR-29a, miR-301a-5p, miR-4324, miR-28c, miR-423-5p, miR-2428, miR-24-3p, miR-6527, novel\_101, miR-29c-3p, novel\_60, miR-342-3p, miR-363-3p, miR-3956-3p

miR-545-5p, miR-582-3p, miR-322-5p, miR-9-5p, miR-7859, miR-15a-5p, miR-548e-3p, miR-1193, miR-5703, miR-29a-5p, miR-2424, miR-376c-3p, miR-195a-3p, miR-29b-2-5p, miR-487a, miR-26a-5p, miR-6119-5p, novel\_32, miR-133c, miR-15b-5p, miR-376c-3p, miR-376e-3p, miR-377-3p, miR-300-3p, miR-323-5p, miR-216b-5p, miR-154a-3p, miR-2285aa, miR-542-5p, miR-2355-5p, miR-487a-3p, miR-548o-3p, miR-625-5p, miR-1814c, miR-186-5p, miR-154b-3p, miR-142a-5p, miR-16-5p, miR-424-5p, miR-6516-3p, miR-151-3p, miR-6740-5p, miR-29b-2-5p, miR-409-3p, miR-3604, miR-410-5p, miR-2285j, miR-126a-5p, miR-142-5p, miR-539-5p, miR-151a-3p, miR-330-3p, miR-497-5p, miR-16b, miR-323b, miR-194-5p, miR-1285, miR-296-3p, miR-2310, miR-432-3p, miR-6240, miR-424-5p, miR-330-3p, miR-323b-3p, miR-16b, miR-194a, miR-377-3p, miR-296-3p, miR-144-3p, miR-6535, miR-323a-5p, miR-2483-3p, miR-26b-5p, miR-216b-3p, miR-544-5p, miR-195a-5p, miR-2285ab, miR-371b-3p, miR-2285f, miR-194b-5p, miR-9-5p, miR-2285x, miR-490-5p, miR-154-3p, miR-6119-3p, novel\_1, miR-16a, miR-15a, miR-142b, miR-6402  
 miR-3120-3p, miR-139-5p, miR-10b, miR-320c, miR-7857-3p, miR-216a-3p, miR-3065-5p, miR-18a-3p, miR-219a-5p, miR-452-5p, miR-181d-5p, miR-9-5p, miR-2428, miR-769-5p, novel\_87, miR-502-5p, miR-218-5p, miR-1343-3p, miR-455-3p, miR-9788-3p, miR-2355-3p, miR-432-5p, miR-185-5p, miR-22-3p, miR-30b-3p, miR-432, miR-653, miR-181a-5p, miR-1285, miR-2284x, miR-30b-3p, miR-3187-3p, miR-2310, miR-2411-3p, miR-320b, miR-552-3p, miR-2331-3p, miR-221-5p, miR-22-3p, miR-139-5p, miR-769, miR-656-3p, miR-3154, miR-433-3p, miR-320a, miR-23a-5p, miR-543-3p, miR-186-5p, miR-1814c, miR-193a-5p, miR-28a-3p, miR-145a-3p, miR-145-3p, miR-338-3p, miR-181c-5p, miR-769-5p, miR-2332, miR-708-5p, miR-28-5p, miR-134-5p, miR-3600, miR-7641, miR-18a-3p, miR-134-5p, miR-532-3p, miR-9-5p, miR-5703, miR-188-3p, miR-140-3p, miR-345-3p, miR-134, miR-193b-5p, miR-128-3p, miR-4429, miR-2385-3p, miR-181a-2-3p, miR-345-3p, miR-216c-5p, novel\_39, miR-192-3p, miR-490-3p, miR-345-3p, miR-6119-5p, miR-1277-5p, miR-221-5p, miR-2484, novel\_127, miR-320d, miR-28-3p, miR-181b-5p

SERBP1      ENSOARGO(SERPINE1)

RPL13        ENSOARGO(ribosoma)

miR-3591-3p, miR-306b-5p, miR-2387, miR-2285ab, miR-639b, miR-378f, miR-6516-3p, miR-412-3p, miR-10a-5p, miR-378b, miR-3074-5p, miR-216b-3p, miR-181b-3p, miR-320c, miR-677, miR-6535, miR-299b-3p, miR-146b-3p, miR-28c, miR-6402, miR-17-3p, miR-199b-5p, miR-2285m, miR-326-3p, miR-371b-3p, miR-24-3p, miR-3071-5p, miR-1434-3p, miR-653, miR-2889, miR-369-5p, miR-219a-1-3p, miR-30b-3p, miR-26b-3p, miR-665, miR-149-5p, miR-134-3p, miR-185-5p, miR-2411-3p, miR-105-5p, miR-1343-5p, miR-124-5p, miR-483-3p, miR-2483-5p, miR-130b-5p, miR-345-5p, miR-6412, miR-432-3p, miR-432-3p, miR-3154, miR-320a, miR-200a-5p, miR-485-5p, miR-671-5p, miR-1814c, miR-1248, miR-345-5p, miR-10a-3p, miR-141-3p, miR-2355-5p, miR-199a-5p, miR-3969, miR-409-3p, miR-331-3p, miR-6740-5p, miR-486b-3p, miR-144-5p, miR-3607-3p, miR-378c, miR-323-3p, miR-330-5p, miR-1343-5p, miR-345-3p, miR-3591-5p, miR-10a-5p, miR-105-2, miR-1224-5p, miR-299a-3p, miR-758-5p, miR-483-3p, miR-378h, miR-505-5p, miR-30c-2-3p, miR-2397-5p, miR-205-5p, miR-200a-3p, miR-127-5p, miR-17-3p, miR-4286, miR-2403, miR-30a-3p, miR-490-3p, miR-200a, novel\_39, miR-199a-5p, miR-29a-5p, miR-28b, miR-381-3p, miR-199b-5p, miR-140-5p, miR-361-3p, miR-1983, miR-504, miR-136-5p, miR-452-3p, miR-4443, miR-144-5p, miR-7857-3p, miR-378e, miR-378g, miR-3596, miR-107-5p, novel\_82, miR-4726-5p, miR-2285f, miR-2447, miR-30b-3p, miR-323b, miR-10b, miR-378b, miR-3120-5p, miR-378c, miR-1388-5p, miR-181b-2-3p, miR-222-5p, novel\_4, miR-105-1, miR-455-3p, miR-9788-3p, miR-425-3p, miR-505, miR-323b-3p, novel\_115, miR-326, miR-320b, miR-214-3p, miR-103a-2-5p, miR-199b-5p, miR-487b-5p, miR-25-5p, miR-744-3p, miR-23a-3p, miR-2310, miR-378d, miR-30c-1-3p, let-7f-1-3p, miR-186-5p, miR-543-3p, miR-345-5p, miR-2312, miR-532-5p, miR-21-3p, miR-548c-3p, miR-221-5p, miR-30c-1-3p, miR-504-5p, miR-1843b-5p, miR-30b-3p, miR-2426, miR-1839-5p, miR-1343-3p, miR-18a-3p, miR-503-5p, miR-500-5p, novel\_17, miR-2285p, miR-503-5p, miR-3601, miR-500a-5p, miR-2898, novel\_127, miR-503-5p, miR-4286, miR-363-5p, miR-376c-3p, miR-432-3p, miR-432-3p, miR-362-5p, miR-18a-3p, miR-129b-3p, miR-504, miR-876-3p, miR-1291, miR-485-5p, miR-504-5p, miR-320b, novel\_69, miR-374c-3p, miR-376e-3p, miR-4443, miR-376c-3p, miR-410-5p, miR-3969, miR-665, miR-335, miR-335-5p, miR-145a-3p, miR-361-3p, miR-362-5p, miR-500b-5p, miR-2428, miR-6134, miR-145-3p, miR-423-5p, miR-3184-5p

EXOSC7 ENSOARGO(exosome)

ST6GALNACENSOARGO(ST6Galp)

miR-411b-3p, miR-299b-3p, novel\_69, miR-669, miR-378b, miR-10a-5p, miR-505-3p, miR-135b-5p, miR-378f, miR-148a-3p, miR-3591-3p, miR-378b, miR-150-5p, miR-371b-3p, miR-2428, miR-17-3p, miR-379-3p, miR-199c, miR-502b, miR-28c, miR-502-5p, miR-134-3p, miR-412-5p, miR-544b, miR-149-5p, miR-194-3p, miR-133b-5p, miR-26b-3p, miR-339-5p, miR-30b-3p, miR-455-5p, miR-27b-3p, miR-873a-5p, miR-432-3p, miR-296-3p, miR-6240, miR-130b-5p, miR-628-5p, miR-363-5p, miR-1343-5p, miR-452-5p, miR-296-3p, miR-455-5p, miR-330-3p, miR-197-5p, miR-223-5p, miR-141-3p, miR-2285aa, miR-1248, miR-485-5p, miR-23a-5p, miR-3074-1-3p, miR-301, miR-3154, miR-378c, miR-145-3p, miR-133a-3p, miR-103b, miR-3607-3p, miR-134-5p, miR-28-5p, miR-494-5p, miR-135a-5p, miR-100-3p, miR-378h, miR-6516-5p, miR-9-5p, miR-486-5p, miR-134-5p, miR-299a-3p, novel\_79, miR-412, miR-1224-5p, miR-411-3p, miR-10a-5p, miR-134, miR-1343-5p, miR-28b, miR-200a, novel\_39, miR-4286, miR-17-3p, miR-2898, novel\_96, miR-200a-3p, miR-152-3p, miR-664-3p, miR-339a, miR-3082-5p, miR-378g, miR-378e, miR-27a-3p, miR-664b, miR-4792, miR-129b-5p, miR-154a, miR-423-5p, miR-541-3p, miR-9-5p, miR-452-5p, miR-2284q, miR-2440, miR-107-5p, miR-2459, miR-455-3p, miR-9788-3p, miR-199b-3p, novel\_4, miR-330-3p, miR-2300a-5p, miR-27a-3p, miR-544a, miR-450b-5p, miR-2426, miR-378c, miR-3120-5p, miR-143-5p, miR-10b, miR-541, miR-378b, miR-2284r, miR-484, miR-30b-3p, miR-323b, miR-412-3p, miR-378d, miR-491-5p, miR-103a-2-5p, miR-214-3p, miR-323b-3p, miR-6130, miR-10a, miR-544-3p, miR-6516, miR-378a-3p, miR-532-5p, miR-296-3p, miR-21-3p, miR-339b, miR-133b-3p, miR-186-5p, miR-21a-3p, miR-487b-5p, miR-346, miR-6525, miR-10b-5p, miR-6134, miR-3184-5p, miR-4510, miR-378c, miR-3074-2-3p, miR-214, miR-664a, miR-17-3p, miR-130b-5p, miR-708-5p, miR-4492, miR-129-5p, miR-320a, miR-148b-3p, novel\_83, miR-2284b-

miR-10b-5p, miR-206-3p, miR-29c-5p, miR-338-3p, miR-378c, miR-145a-3p, miR-664a, miR-708-5p, miR-324-3p, miR-29d-5p, miR-132-5p, miR-193b-3p, miR-139-5p, miR-22-3p, miR-204-3p, miR-378a-3p, miR-370-5p, let-7g-3p, miR-27b-5p, miR-2432, miR-216c-5p, miR-2887, miR-760-3p, miR-34b-5p, miR-30b-3p, miR-299-3p, miR-412-5p, miR-125b, miR-185-3p, novel\_83, miR-532-3p, miR-3600, miR-378d, novel\_133, miR-2300b-3p, miR-3059-5p, miR-541-3p, miR-4726-5p, miR-335, miR-2284q, miR-769-5p, miR-378e, miR-3064-5p, miR-452-3p, miR-10b, miR-877-3p, miR-361-3p, miR-199b-5p, miR-30c-1-3p, miR-3187-3p, miR-2330-5p, miR-382-3p, let-7c-3p, miR-3085-3p, miR-25-5p, miR-326, miR-1306-5p, novel\_4, miR-409b, miR-2300a-5p, miR-378c, miR-450b-5p, miR-2426, miR-6529a, miR-296-5p, miR-378b, miR-484, miR-10b, miR-378c, miR-1306-5p, miR-204-5p, miR-486b-3p, miR-28-5p, miR-410-5p, miR-370-5p, miR-135a-1-3p, miR-331-3p, miR-34c-5p, miR-769, miR-199a-5p, miR-3957, miR-3957-5p, miR-370-3p, miR-7144-5p, miR-485-5p, miR-488-3p, miR-3154, miR-28b, miR-199a-5p, miR-1271-3p, miR-1, miR-4286, miR-450a-2-3p, miR-2898, miR-1260a, miR-30c-2-3p, miR-378h, miR-214-5p, miR-128-3p, miR-10a-5p, miR-615-3p, miR-345-3p, miR-3578, miR-134, miR-211, miR-326-3p, miR-449a, miR-2428, miR-1193, miR-656-5p, miR-502b, miR-6402, miR-133a-5p, miR-34c, miR-2404, miR-34b, miR-378b, miR-10a-5p, miR-450b-3p, miR-1291, miR-6395, miR-18a-3p, miR-378b, miR-654-3p, miR-124-5p, miR-125a-5p, miR-1343-5p, miR-197-5p, miR-2355-3p, miR-187-3p, miR-26b-3p, miR-1260b, miR-653, miR-1434-3p, miR-145a-5p, miR-6525, miR-769-5p, miR-346, miR-3074-5p, miR-500, miR-874-5p, miR-4492, miR-2285j, miR-10a, miR-2331-3p, miR-504-5p, miR-30c-1-3p, miR-1277-3p, miR-296-3p, miR-552-3p, miR-186-5p, miR-1827, miR-500a-3p, miR-129b-3p, miR-186-3p, miR-143-3p, miR-2285w, miR-345-3p, miR-3653-3p, miR-3591-3p, miR-150-5p, miR-409-5p, miR-2387, miR-9-3p, miR-378f, miR-504, miR-7977, miR-3120-3p, miR-20a-3p, miR-320c, miR-3082-5p, miR-374c-3p, miR-378e, miR-33a-3p, miR-382-5p, miR-218-5p, miR-490-5p, miR-3964, miR-499a-5p, miR-3958-3p, miR-2284j, miR-9-5p, novel\_120, miR-2428, miR-30b-3p, miR-412-3p, miR-2284r, miR-378b, miR-2284x, miR-101c, miR-1839-5p, miR-219a-1-3p, miR-30b-3p, miR-378c, miR-2284ab, novel\_116, miR-6238, miR-147a, miR-2411-3p, miR-29b-1-5p, miR-197-5p, novel\_115, miR-5126, miR-320b, miR-660, miR-487b-5p, miR-33a-5p, miR-376b, miR-1388-3p, miR-2310, miR-1b-5p, miR-432-3p, miR-2284l, miR-378d, miR-432-3p, miR-320a, miR-1814c, miR-671-5p, miR-7144-5p, miR-2318, miR-2355-5p, miR-542-5p, miR-21-3p, miR-874-3p, miR-660-5p, miR-2331-3p, miR-504-5p, miR-378a-3p, miR-2284n, novel\_25, miR-324-5p, miR-6130, miR-132-5p, miR-374c-3p, miR-132-5p, miR-410-5p, miR-2284k, miR-669a-3p, miR-487a-5p, miR-6516-3p, miR-103b, miR-4510, miR-378c, miR-539-5p, miR-1306-5p, miR-338-3p, miR-378c, miR-378a-3p, miR-1434-5p, miR-3578, miR-378i, miR-345-3p, miR-361-5p, miR-184-3p, miR-4429, miR-412, miR-2284h-5p, miR-2411-5p, miR-378h, miR-9-5p, miR-345-3p, miR-422a, miR-3071-3p, miR-324-3p, miR-2285p, novel\_17, miR-543-5p, miR-3653-3p, miR-30b-3p, miR-320d, miR-450a-2-3p, miR-2284m, miR-5100, miR-2285w, novel\_39, miR-2411, miR-29b-1-5p, miR-450b-5p

PPP1CA ENSOARGO( protein

ATP6V1B1 ENSOARGO( ATPase,



miR-874-3p, miR-370-3p, miR-125a, miR-34c-5p, miR-301, miR-93-5p, miR-17-5p, miR-320a, miR-345-5p, miR-3074-1-3p, miR-20b-5p, miR-671-5p, miR-193a-5p, miR-93, miR-1260b, miR-365a-5p, miR-410-5p, miR-2433, miR-125b-5p, miR-331-3p, miR-138-5p, miR-28-5p, miR-6517, novel\_79, miR-129-1-3p, miR-345-3p, miR-615-3p, miR-1343-5p, miR-330-5p, miR-582-3p, miR-3064-5p, miR-3065-3p, novel\_39, miR-1260a, miR-339a, miR-2898, miR-450a-2-3p, novel\_96, miR-543-5p, novel\_127, miR-34b, novel\_69, miR-320c, miR-6535, miR-2387, miR-1306, miR-18a-3p, miR-1291, miR-135a-2-3p, novel\_101, novel\_27, miR-326-3p, miR-449a, miR-2428, miR-4324, miR-20a-5p, miR-576-3p, miR-34c, miR-625-3p, miR-656-5p, miR-22-5p, miR-31-5p, miR-339-5p, miR-432-5p, miR-412-5p, miR-185-5p, miR-3431, miR-20b, miR-432, miR-138, miR-1260b, miR-4508, miR-455-5p, miR-2284x, miR-130b-5p, miR-345-5p, miR-365b-5p, miR-17-5p, miR-106a-5p, miR-455-5p, miR-1343-5p, miR-125a-5p, miR-3065-3p, miR-6130, miR-216b-5p, miR-299, miR-433-3p, miR-339b, miR-345-5p, miR-625-5p, miR-1827, miR-539-5p, miR-4510, miR-3184-3p, miR-129-2-3p, miR-145a-3p, miR-214, miR-6525, miR-3184-5p, miR-6134, miR-338-3p, miR-665, miR-320e, miR-708-5p, miR-487a-5p, miR-4492, miR-208b-5p, miR-130b-5p, miR-18a-3p, miR-106a, miR-2284h-5p, miR-2366, miR-2904, miR-1193, miR-188-3p, miR-4429, miR-133a-3p, miR-34a-5p, miR-20a, miR-345-3p, miR-196a-3p, miR-618, miR-324-3p, miR-345-3p, miR-125b, miR-106a, miR-320d, miR-34b-5p, miR-3064-5p, miR-7977, miR-3082-5p, miR-4443, miR-361-3p, miR-136-5p, miR-877-3p, miR-541-3p, miR-1296-5p, miR-361-3p, miR-423-5p, miR-615, miR-3968, miR-1343-3p, novel\_78, miR-409b, miR-2300a-5p, miR-455-3p, miR-296-5p, miR-541, miR-758-3p, miR-1388-3p, miR-106a-5p, miR-744-3p, miR-376b, miR-4532, miR-758-3p, miR-320b, miR-326, miR-1306-5p, miR-106b-5p, miR-491-5p, miR-3085-3p, miR-3955-

miR-200b-3p, miR-345-3p, miR-134, miR-1290, miR-330-5p, miR-9-5p, miR-134-5p, miR-545-5p, novel\_121, miR-129-1-3p, miR-429-3p, novel\_79, miR-450a-2-3p, miR-200c-3p, miR-1260a, miR-200c, miR-30f, miR-339a, miR-2478, miR-3065-3p, miR-29a-5p, miR-2284y, miR-2284a, miR-450c-5p, miR-1271-3p, miR-192-3p, miR-3529-3p, miR-30a-3p, miR-1, miR-345-5p, miR-329b, miR-20b-5p, miR-1814c, miR-1248, miR-488-3p, miR-93-5p, miR-320a, miR-17-5p, miR-223-5p, miR-376c-3p, miR-154b-5p, miR-574-5p, miR-1271, miR-134-5p, novel\_63, miR-2284k, miR-370-5p, miR-409-3p, miR-93, miR-1260b, miR-193a-5p, miR-3607-3p, miR-2284ab, miR-1260b, miR-19b-2-5p, miR-653, miR-1434-3p, miR-1285, miR-223-3p, miR-197-3p, novel\_23, miR-145a-5p, miR-3071-5p, miR-2284d, miR-2285g, miR-6238, miR-20b, miR-3955-5p, miR-339-5p, miR-26b-3p, miR-378a-5p, miR-2285l, miR-452-5p, miR-466f-3p, miR-193a-3p, miR-224-5p, miR-146a, miR-377-3p, miR-330-3p, miR-106a-5p, miR-17-5p, miR-2411-3p, miR-432-3p, miR-654-3p, miR-2285r, miR-432-3p, miR-345-5p, miR-6240, miR-382, miR-628-5p, miR-146b-5p, miR-505-3p, miR-2285ab, miR-2387, miR-3970, miR-3591-3p, miR-3065-5p, miR-146b-3p, miR-323a-5p, miR-670-3p, novel\_69, miR-320c, novel\_68, miR-3074-5p, miR-329-5p, miR-320b, miR-26b-5p, miR-6119-3p, novel\_1, miR-206, miR-421-5p, miR-147-5p, miR-20a-5p, miR-382-5p, miR-33a-3p, miR-24-3p, miR-326-3p, novel\_27, novel\_120, miR-136-3p, miR-193b-3p, miR-1193, miR-33b-3p, novel\_73, miR-4429, miR-148a-5p, miR-2284u, miR-1246, miR-1197-5p, miR-5703, miR-23b-3p, miR-7859, miR-200b, miR-532-3p, novel\_83, miR-548e-3p, miR-106a, miR-30d-3p, miR-505-3p, miR-212-5p, miR-106a, miR-320d, miR-760-3p, miR-1277-5p, miR-21-3p, miR-26a-5p, miR-216a-5p, miR-345-3p, miR-421-5p, miR-376c-3p, miR-146a-5p, miR-329a-5p, miR-216c-5p, miR-20a, miR-2312, miR-345-5p, miR-3141, miR-331-5p, miR-1306, miR-150-5p, miR-136-5p, miR-23a-5p, miR-2319b, miR-370-5p, miR-2285aa, miR-552-3p, miR-376e-3p, miR-6130, miR-6535, miR-22-3p, miR-376c-3p, miR-370-5p, miR-331-3p, miR-331-5p, miR-486b-3p, miR-6123, miR-145a-3p, miR-129-2-3p, miR-4510, miR-425-5p, miR-665-5p, miR-1193, miR-1197-3p, miR-2284r, miR-7b-5p, miR-412-3p, miR-1343-5p, miR-22-3p, miR-5703, miR-378d, miR-187-3p, miR-31-5p, miR-1343-3p, miR-412, miR-505-5p, miR-147a, miR-216a-3p, miR-129-1-3p, miR-421, miR-214-5p, miR-7-5p, miR-1306-5p, miR-3141, novel\_51, miR-1343-5p, miR-543-5p, miR-744-3p, miR-125b-2-3p, miR-376c-3p, miR-486-3p, miR-3120-5p, miR-4508, miR-142-3p, miR-138, miR-330-5p, miR-194-5p, miR-140-3p, miR-1246, miR-1290, miR-455-3p, miR-147a, miR-134-3p, miR-1271-5p, novel\_4, miR-487b-5p, miR-185-3p, miR-194a, miR-197-5p, miR-219b-5p, miR-26a-5p, miR-326, miR-6119-5p, let-7j, miR-486-3p, miR-3065-3p, miR-376a-5p, miR-345-3p, miR-10b-3p, miR-96-5p, miR-140-5p, miR-769, miR-27a-5p, miR-378g, miR-3120-3p, miR-26b-5p, miR-370-3p, miR-7689-3p, miR-3065-3p, miR-541-5p, miR-486b-3p, miR-4492, miR-138-5p, miR-769-5p, miR-2285j, miR-218-5p, miR-154a, miR-326-3p, miR-3959-3p, miR-769-5p, miR-194b-5p, miR-1271, miR-212-3p, miR-145a-3p

|        |                    |                                                                                                                                                                                                                                                                                                                                                                                                                                                                                                                                                                                                                                                                                                                                                                                                                                                                                                                                                                                                                                                                                                                                                                                                                                                                                                                                                                                                                                                                                                        |
|--------|--------------------|--------------------------------------------------------------------------------------------------------------------------------------------------------------------------------------------------------------------------------------------------------------------------------------------------------------------------------------------------------------------------------------------------------------------------------------------------------------------------------------------------------------------------------------------------------------------------------------------------------------------------------------------------------------------------------------------------------------------------------------------------------------------------------------------------------------------------------------------------------------------------------------------------------------------------------------------------------------------------------------------------------------------------------------------------------------------------------------------------------------------------------------------------------------------------------------------------------------------------------------------------------------------------------------------------------------------------------------------------------------------------------------------------------------------------------------------------------------------------------------------------------|
| FANCI  | ENSOARGO(Fanconi)  | <p>miR-3968, miR-486b-3p, miR-208b-5p, miR-4492, miR-129-5p, miR-30a-3p, miR-378c, miR-129-2-3p, miR-378c, miR-539-5p, miR-495-3p, miR-18a-5p, miR-378f, miR-885-3p, miR-18b, miR-376b-5p, miR-18a, miR-129b-5p, miR-376c-5p, miR-378e, miR-4443, miR-378a-3p, miR-182-5p, miR-760-3p, miR-125a-3p, miR-182-5p, miR-345-3p, miR-422a, miR-2411-3p, miR-500a-5p, miR-378d, miR-450b-5p, miR-486-3p, miR-30a-3p, miR-885-3p, miR-378c, miR-143-5p, miR-345-3p, miR-378b, miR-378i, miR-378a-3p, miR-378h, miR-340-5p, miR-222-5p, miR-129-1-3p, miR-222-5p, miR-30d-3p, miR-18b-5p<br/> miR-7641, miR-1224-5p, miR-2285ad, novel_121, miR-505-5p, miR-30a-5p, miR-2427, let-7a-2-3p, miR-128-3p, miR-1, miR-3064-5p, miR-1271-3p, miR-200a, miR-2478, miR-24-2-5p, miR-217, miR-30c-2-3p, miR-125a-3p, miR-205-5p, miR-543-5p, miR-152-3p, miR-200a-3p, miR-107, miR-127-5p, miR-141-3p, miR-2285aa, miR-324-5p, miR-133c, miR-374c-3p, miR-17-5p, miR-93-5p, miR-200a-5p, miR-30e-5p, miR-671-5p, miR-20b-5p, miR-7144-5p, miR-345-5p, let-7g-3p, miR-329b, miR-3607-3p, miR-93, miR-323-3p, miR-3969, miR-370-5p, miR-135a-1-3p, miR-592, miR-486b-3p, miR-130a-3p, miR-665, miR-103a-3p, miR-31-5p, miR-103, miR-544b, miR-20b, miR-149-5p, miR-412-5p, miR-374b-3p, novel_23, miR-145a-5p, miR-1285, miR-27b-3p, miR-219a-1-3p, miR-668-3p, miR-345-5p, let-7a-2-3p, let-7j, miR-296-3p, miR-432-3p, miR-106a-5p, miR-17-5p, miR-105-5p, miR-296-3p, miR-146a, miR-193a-3p, miR-452-5p, miR-7-1-</p> |
| LPGAT1 | ENSOARGO(lysophos) | <p>3p, novel_68, miR-6535, novel_69, miR-374c-3p, miR-323a-5p, miR-3591-3p, miR-216a-3p, miR-378b, miR-148a-3p, miR-6395, miR-146b-5p, miR-107, miR-1291, miR-2285x, miR-1193, miR-193b-3p, miR-3957-3p, miR-342-3p, miR-301b-3p, miR-2284w, miR-323c, miR-133a-5p, miR-142b, miR-20a-5p, miR-199c, miR-6123, miR-656-5p, miR-206, miR-106a, miR-548e-3p, miR-328-3p, miR-199a-3p, novel_83, miR-148b-3p, miR-7859, miR-217-5p, miR-140-3p, miR-188-3p, miR-376a-5p, miR-378d, miR-33b-3p, miR-142-3p, miR-20a, miR-195a-3p, miR-216c-5p, miR-146a-5p, miR-486-3p, miR-2424, miR-142a-3p, miR-376a-5p, miR-500a-5p, novel_17, miR-196a-3p, miR-30d, miR-760-3p, miR-106a, miR-296-3p, miR-532-5p, miR-21-3p, miR-370-5p, miR-548o-3p, miR-140-5p, miR-545-3p, miR-30c-1-3p, novel_25, miR-204-3p, miR-323-5p, miR-193b-3p, miR-216b-5p, miR-377-3p, miR-544-3p, miR-301a-3p, miR-30d-5p, miR-500a-3p, novel_99, miR-186-5p, miR-345-5p, miR-30f, let-7a-2-3p, miR-214, miR-192-5p, miR-206-3p, miR-205-5p, miR-2285y, novel_124, miR-219a-1-3p, miR-378d, miR-2285ad, miR-181a-2-3p, miR-3957-3p, miR-3082-5p, miR-3959-5p</p>                                                                                                                                                                                                                                                                                                                                                                         |
| ATXN7  | ENSOARGO(ataxin 7) | <p>378d, miR-2285ad, miR-181a-2-3p, miR-3957-3p, miR-3082-5p, miR-3959-5p</p>                                                                                                                                                                                                                                                                                                                                                                                                                                                                                                                                                                                                                                                                                                                                                                                                                                                                                                                                                                                                                                                                                                                                                                                                                                                                                                                                                                                                                          |

miR-331-3p, miR-2433, miR-191-5p, miR-134-5p, miR-486b-3p, miR-3607-3p, miR-6128, miR-193a-5p, miR-365a-5p, miR-378c, miR-1197-3p, miR-500b-5p, miR-93, miR-18a, miR-17-5p, miR-362-5p, miR-3154, miR-93-5p, miR-488-3p, miR-7144-5p, miR-20b-5p, miR-615-5p, miR-2355-5p, miR-874-3p, miR-574-5p, miR-154b-5p, miR-199a-5p, miR-769, miR-300-3p, miR-339a, miR-30c-2-3p, miR-125a-3p, novel\_96, novel\_127, miR-152-3p, miR-2898, miR-2385-3p, miR-490-3p, miR-199a-5p, miR-3065-3p, miR-330-5p, miR-1343-5p, miR-134, miR-128-3p, miR-155-5p, miR-411-3p, miR-18b-5p, novel\_79, miR-1224-5p, miR-222, miR-134-5p, miR-545-5p, miR-483-3p, miR-378h, miR-505-5p, miR-302a-5p, miR-425-5p, miR-6529b, miR-20a-5p, miR-379-3p, miR-6119-3p, miR-495-3p, miR-758-5p, miR-3957-3p, miR-342-3p, miR-2284w, miR-199b-5p, miR-2285m, miR-326-3p, miR-24-3p, miR-216a-3p, miR-18a-3p, miR-378b, miR-150-5p, miR-148a-3p, miR-3141, miR-18b, miR-2285ab, miR-6395, miR-378f, miR-450b-3p, miR-1291, miR-320b, miR-3074-5p, novel\_69, miR-374c-3p, novel\_51, miR-106a-5p, miR-17-5p, miR-365b-5p, miR-2285v, miR-3141, miR-296-3p, miR-224-5p, miR-1343-5p, miR-124-5p, miR-483-3p, miR-363-5p, miR-296-3p, miR-873a-5p, miR-4508, miR-30b-3p, miR-339-5p, miR-20b, miR-3431, miR-134-3p, miR-2285g, miR-132-5p, miR-2285j, miR-222-3p, miR-500, miR-4492, miR-874-5p, miR-155-5p, miR-664a, miR-3074-5p, miR-145a-3p, miR-378c, miR-338-3p, miR-3184-5p, miR-122-5p, miR-346, miR-224-5p, miR-6525, miR-769-5p, miR-500a-3p, miR-2285c, miR-1827, miR-18a-5p, miR-339b, miR-2312, miR-296-3p, miR-552-3p, miR-3065-3p, miR-30c-1-3p, miR-221-5p, miR-378a-3p, miR-2331-3p, miR-155-5p, miR-204-3p, miR-2284s, miR-27a-5p, miR-92a-1-5p, miR-422a, miR-500a-5p, miR-324-3p, novel\_17, miR-221-5p, miR-760-3p, miR-466i-5p, miR-106a, miR-20a, miR-105-3p, miR-486-3p, miR-188-3p, miR-378a-

miR-330-5p, miR-23b-5p, miR-2284z, miR-450a-1-3p, miR-129-1-3p, miR-9-5p, novel\_79, miR-1224-5p, miR-431, miR-6517, novel\_127, miR-127-5p, miR-3071-3p, miR-205-5p, miR-125a-3p, novel\_39, miR-29a-5p, miR-148b-5p, miR-3064-5p, miR-20b-5p, miR-345-5p, miR-93-5p, miR-30e-5p, miR-376c-3p, miR-3959-5p, miR-2285aa, miR-125a, miR-1271, miR-874-3p, miR-125b-5p, miR-193a-5p, miR-144-5p, novel\_42, miR-28a-3p, miR-2284v, miR-27b-3p, miR-16-1-3p, miR-450c-3p, miR-432, miR-1843b-5p, miR-542-3p, miR-2113, miR-194-3p, miR-149-5p, miR-3431, miR-339-5p, miR-3955-5p, miR-365b-5p, novel\_51, miR-2411-3p, miR-377-3p, miR-378f, miR-3970, miR-216a-3p, miR-6535, miR-669, miR-677, miR-181b-3p, novel\_69, miR-3120-3p, novel\_68, miR-6119-3p, miR-142b, miR-335-5p, miR-16-1-3p, miR-133a-3p, miR-34a-5p, miR-184-3p, miR-378a-3p, miR-378i, miR-2366, miR-7859, miR-18a-3p, miR-106a, miR-324-3p, miR-92a-1-5p, miR-422a, miR-345-3p, miR-210-5p, miR-376c-3p, miR-181b-1-3p, miR-503-5p, miR-1827, miR-186-5p, miR-345-5p, miR-339b, miR-500a-3p, miR-299, miR-450a-1-3p, miR-376e-3p, miR-377-3p, miR-10a, miR-2331-3p, miR-504-5p, miR-500, miR-874-5p, miR-4492, miR-1468-5p, novel\_74, miR-151-3p, miR-665, miR-664a-5p, miR-3184-5p, miR-122-5p, miR-769-5p, miR-6525, miR-346, miR-214, miR-129-2-3p, miR-758-3p, miR-2284r, miR-301b-5p, miR-541, miR-455-3p, miR-421, miR-153, miR-147a, miR-376b-3p, miR-145b, miR-181b-2-3p, miR-1343-3p, miR-153-3p, miR-214-3p, miR-29b-1-5p, novel\_19, miR-106b-5p, miR-431-5p, miR-2310, miR-378d, miR-1388-3p, miR-376a-3p, miR-504, miR-378j, miR-140-5p, miR-409-5p, miR-203-3p, miR-144-5p, miR-4443, miR-7689-3p, miR-211-5p, miR-139-5p, miR-490-5p, miR-3968, miR-499a-5p, miR-301a-5p, miR-2440, miR-423-5p, miR-1285-5p, miR-877-3p, miR-361-3p, novel\_111, miR-9-5p, miR-2447, miR-128-3p, miR-10a-5p, miR-218-2-3p, miR-345-

miR-450a-1-3p, miR-129-1-3p, novel\_79, miR-330-5p, miR-148b-5p, let-7g, let-7f-5p, miR-200a-3p, novel\_96, novel\_127, miR-205-5p, miR-125a-3p, miR-3068-3p, miR-2355-5p, miR-125a, miR-329a, miR-345-5p, miR-331-5p, miR-1197-3p, miR-1260b, miR-331-5p, miR-125b-5p, miR-100-3p, miR-412-5p, miR-149-5p, miR-340-3p, miR-3955-5p, miR-339-5p, miR-1843b-5p, miR-2113, miR-7b-5p, miR-542-3p, miR-450c-3p, let-7f-2-3p, miR-628-5p, let-7f-2-3p, miR-378a-5p, miR-483-3p, miR-7-5p, miR-377-3p, miR-105-5p, miR-365b-5p, miR-194a, miR-2411-3p, novel\_51, novel\_69, miR-6535, miR-669, novel\_68, miR-329-5p, miR-412-3p, let-7e-5p, miR-216a-3p, miR-3591-3p, miR-199b-5p, miR-142b, miR-328-3p, miR-18a-3p, miR-212-5p, miR-33b-3p, miR-664-5p, miR-133a-3p, miR-34a-5p, miR-1961, miR-2366, miR-1434-5p, miR-486-3p, miR-329a-5p, miR-345-3p, miR-98-5p, let-7k, miR-2285p, miR-210-5p, miR-324-3p, miR-345-3p, miR-92a-1-5p, miR-10a, miR-582-5p, miR-377-3p, miR-216b-5p, let-7i-5p, miR-548o-3p, miR-216b-3p, miR-296-3p, miR-345-5p, miR-339b, miR-625-5p, miR-186-5p, miR-1827, miR-450a-1-3p, miR-129b-3p, miR-411, miR-769-5p, miR-346, miR-224-5p, miR-3184-5p, let-7b, miR-3184-3p, miR-129-2-3p, miR-214, miR-665-5p, miR-129-5p, miR-1468-5p, miR-4492, miR-130b-5p, let-7f, miR-665, miR-153, miR-455-3p, miR-1185-3p, miR-2459, miR-1343-3p, miR-1388-5p, miR-362-3p, miR-329-3p, miR-758-3p, miR-8485, miR-491-5p, miR-153-3p, miR-199b-5p, miR-214-3p, miR-505, miR-3596, miR-203-3p, miR-1185-2-3p, miR-4443, miR-139-5p, miR-96-5p, miR-3963, miR-493-5p, miR-1983, miR-140-5p, miR-361-3p, novel\_111, miR-423-5p, miR-7705, miR-3956-3p, miR-3968, novel\_82, miR-483-3p, miR-1271-5p, miR-6516-5p, miR-423-3p, miR-7641, let-7d, miR-105-2, miR-128-3p, miR-10a-5p, miR-345-3p, miR-3578, miR-199a-5p, miR-3065-3p, miR-490-3p, miR-181a-2-3p, miR-17-3p, miR-2898, miR-191-3p, miR-1260a, miR-

miR-17-3p, novel\_74, miR-424-5p, miR-129-5p, miR-145a-3p, miR-4510, miR-378c, novel\_99, miR-487b-5p, miR-6130, miR-216b-5p, miR-544-3p, miR-15b-5p, miR-204-3p, miR-378a-3p, miR-221-5p, miR-545-3p, miR-2331-3p, miR-504-5p, miR-532-5p, miR-370-5p, miR-3065-3p, miR-2284m, miR-106a, miR-21-3p, miR-221-5p, novel\_17, miR-422a, miR-181b-1-3p, miR-376a-5p, miR-380-3p, miR-2432, miR-105-3p, miR-2285w, miR-183-5p, miR-20a, miR-184-3p, miR-493-3p, miR-362-3p, miR-378i, miR-1197-5p, miR-378a-3p, miR-5703, miR-217-5p, miR-2904, miR-222-5p, miR-15a-5p, miR-199a-3p, miR-2284h-5p, miR-106a, miR-18a-3p, miR-4726-5p, miR-3968, miR-2440, miR-301a-5p, miR-361-3p, miR-541-3p, miR-2447, miR-2284j, miR-504, novel\_94, miR-199b-5p, miR-378j, miR-3596, miR-378e, miR-203-3p, miR-20a-3p, miR-374b-5p, miR-491-5p, miR-199b-5p, miR-326, novel\_115, miR-431-5p, miR-199a-3p, miR-106b-5p, miR-16b, miR-362-3p, miR-378d, miR-8485, miR-424-5p, miR-127-3p, miR-106a-5p, miR-744-3p, miR-33a-5p, miR-544a, miR-2426, miR-362-3p, miR-378c, miR-101c, miR-541, miR-301b-5p, miR-329-3p, miR-378b, miR-126a-5p, miR-455-3p, miR-409b, miR-105-1, miR-2300a-5p, miR-145b, miR-181b-2-3p, miR-767-5p, miR-374b-3p, miR-370-5p, miR-494-5p, miR-2284k, miR-29b-3p, miR-93, miR-145-3p, miR-378c, miR-374b, miR-16-5p, miR-193a-5p, miR-329a, miR-10b-3p, miR-767, miR-7144-5p, miR-20b-5p, miR-381-3p, miR-488-3p, miR-3154, miR-17-5p, miR-93-5p, miR-200a-5p, miR-3959-5p, miR-374c-3p, miR-2284n, miR-324-5p, miR-199a-5p, miR-127-5p, miR-17-3p, miR-2898, novel\_127, miR-543-5p, novel\_96, miR-217, miR-3071-3p, miR-192-3p, miR-3065-3p, miR-199a-5p, miR-3529-3p, miR-181a-2-3p, miR-2385-3p, miR-300, miR-105-2, miR-1290, miR-330-5p, miR-29d-3p, miR-1343-5p, miR-378h, miR-322-5p, miR-6517, miR-431, miR-7641, miR-29a, miR-20a-5p, miR-147b, miR-15a, miR-16a, miR-371b-3p, miR-100b-5p, miR-let-7d, miR-1839-5p, miR-1961, miR-412-3p, miR-758-3p, miR-412-5p, miR-7859, miR-148b-3p, let-7g-5p, novel\_121, miR-548e-3p, miR-412, miR-376a-5p, miR-98-5p, let-7f-5p, let-7e, miR-152-3p, let-7k, novel\_17, miR-1306-5p, let-7c-5p, let-7g, miR-758-3p, let-7a-5p, miR-195a-3p, let-7e-5p, miR-376a-2-5p, miR-148a-3p, miR-1306, let-7d-5p, let-7i-5p, miR-574-5p, let-7f, miR-142b, let-7i, miR-338-5p, let-7b-5p, let-7b, miR-3059-5p, miR-212-3p

ATP5H ENSOARGO(ATP synt.

USP38 ENSOARGO(ubiquiti.

miR-17-5p, miR-106a-5p, miR-455-5p, miR-1343-5p, miR-130b-5p, miR-6412, miR-345-5p, miR-654-3p, miR-455-5p, miR-2889, miR-29b, miR-138, miR-219a-1-3p, miR-130a-3p, miR-26b-3p, miR-20b, miR-103, miR-2285g, miR-185-5p, miR-20a-5p, miR-3957-3p, miR-17-3p, miR-342-3p, miR-326-3p, miR-18a-3p, miR-2285ab, miR-2387, miR-9851-3p, miR-6395, miR-1291, miR-107, miR-19a-3p, miR-320b, miR-10a-5p, miR-2404, miR-29a-3p, miR-670-3p, miR-30c-2-3p, miR-339a, miR-217, miR-2285af, miR-6119-5p, miR-200c, miR-107, miR-17-3p, miR-450a-2-3p, miR-200c-3p, miR-181a-2-3p, miR-199a-5p, miR-3065-3p, miR-29d-3p, miR-615-3p, miR-3578, miR-105-2, miR-200b-3p, miR-10a-5p, miR-222, miR-214-5p, miR-483-3p, miR-378h, miR-331-3p, miR-34c-3p, miR-29b-3p, miR-135a-1-3p, miR-2332, miR-138-5p, miR-378c, miR-365a-5p, miR-93, miR-323-3p, miR-17-5p, miR-488-3p, miR-7144-5p, miR-485-5p, miR-10b-3p, miR-370-3p, miR-199a-5p, miR-324-5p, miR-769, miR-342, miR-326, miR-3085-3p, miR-3955-3p, let-7c-3p, miR-376b, miR-2330-5p, miR-106a-5p, miR-3187-3p, miR-193a, miR-30c-1-3p, miR-484, miR-296-5p, miR-378b, miR-10b, miR-378c, miR-2426, miR-5010-3p, miR-409b, miR-105-1, miR-221-3p, miR-216a-3p, miR-2285e, miR-769-5p, miR-1973, miR-4726-5p, miR-335, miR-2285f, miR-212-3p, miR-541-3p, miR-361-3p, miR-199b-5p, novel\_94, miR-541-5p, miR-499b-5p, miR-7977, miR-3064-5p, miR-20a-3p, miR-378e, miR-185-3p, miR-221-5p, miR-299-3p, miR-106a, miR-760-3p, miR-466i-5p, miR-20a, miR-5100, miR-124-3p, miR-378d, miR-19b-3p, miR-548e-3p, miR-200b, miR-324-3p, miR-222-3p, miR-487a-5p, miR-17-3p, miR-664a, miR-378c, miR-145a-3p, miR-10b-5p, miR-21a-3p, miR-2312, miR-3065-3p, miR-21-3p, miR-221-5p, miR-378a-3p, novel\_32, novel\_25, miR-204-3p, miR-193b-3p, miR-105-5p, miR-365b-5p, miR-193a-3p, miR-483-3p, miR-628-5p, miR-2285r, miR-432-3p, miR-107-3p, novel\_22, miR-2284v, miR-330, miR-486-3p, miR-767-5p, miR-378a-5p, miR-767, miR-379-5p, miR-486b-3p, miR-218-1-3p, miR-9851-3p, novel\_82, miR-100-3p, miR-197-5p, miR-30f, miR-486b-3p, miR-4726-5p, miR-665, miR-331-3p, miR-324-3p, miR-326-3p, miR-1285-5p, novel\_111, miR-1197-3p, miR-6525, miR-18a-3p, miR-361-3p, miR-1185-2-3p, miR-323-5p, novel\_69, miR-323a-5p, miR-27a-5p, miR-300-3p, miR-378g, novel\_127, miR-2898, miR-326, miR-2285b, miR-486-3p, miR-29a-5p, miR-432-3p, let-7f-2-3p, let-7f-2-3p, miR-4286, miR-363-5p, miR-124a, miR-330-5p, miR-5703, miR-124-3p, miR-2300b-3p, miR-6529a, miR-1185-3p, miR-134-3p, miR-505-5p, miR-18a-3p

PRR14L ENSOARGO( proline

TMEM163 ENSOARGO( transmem

ITGA7 ENSOARGO( integrin



miR-149-5p, miR-3431, miR-26b-3p, miR-133b-5p, miR-340-3p, miR-744-5p, miR-497-5p, miR-4508, miR-138, miR-16b, novel\_23, miR-374b-3p, miR-22-3p, miR-432-3p, miR-660, miR-2411-3p, miR-2331-5p, miR-377-3p, miR-374c-3p, miR-299b-3p, miR-216b-3p, miR-6395, miR-195a-5p, miR-376a-2-5p, miR-412-3p, miR-3591-3p, miR-18a-3p, miR-2285ab, miR-326-3p, miR-2285x, miR-6123, miR-203b-5p, miR-16a, miR-142b, miR-15a, miR-214-5p, miR-129-1-3p, miR-6516-5p, miR-2411-5p, miR-322-5p, miR-376a-5p, miR-299a-3p, miR-2285ad, miR-582-3p, miR-330-5p, miR-345-3p, novel\_39, miR-181a-2-3p, novel\_127, miR-200a-3p, miR-331-5p, miR-374c-3p, miR-1271, miR-141-3p, miR-2355-5p, miR-874-3p, miR-7144-5p, miR-3154, miR-181c-3p, miR-103b, miR-16-5p, miR-486b-3p, miR-28-5p, miR-138-5p, miR-331-3p, miR-2332, miR-410-5p, miR-2459, miR-455-3p, miR-1298-3p, miR-147a, miR-222-5p, miR-2300a-5p, miR-2426, miR-296-5p, miR-8485, miR-424-5p, miR-494-3p, miR-214-3p, miR-16b, miR-326, miR-3082-5p, miR-499a-3p, miR-2285u, novel\_94, miR-1983, miR-181a-3p, miR-147-3p, miR-2285f, miR-628-3p, miR-2285y, miR-1973, miR-2285n, miR-328-3p, miR-1247-5p, miR-15a-5p, miR-18a-3p, miR-378d, miR-5703, miR-1197-5p, miR-2904, miR-376a-5p, novel\_133, miR-486-3p, miR-2411, miR-2887, miR-299-3p, miR-221-5p, miR-30b-3p, miR-466i-5p, miR-345-3p, miR-210-5p, miR-196a-3p, miR-15b-5p, novel\_32, miR-22-3p, miR-377-3p, miR-499b-3p, miR-27a-5p, miR-6516, miR-21-3p, miR-660-5p, miR-221-5p, miR-1895, miR-214, miR-129-2-3p, miR-708-5p, miR-424-5p, miR-874-5p, novel\_74, miR-665, miR-132-5p

miR-306b-3p, miR-490-3p, miR-2284a, miR-28b, miR-1, miR-4286, miR-181a-2-3p, miR-543-5p, miR-2898, miR-30c-2-3p, miR-217, miR-2285af, miR-1260a, miR-582-3p, miR-214-5p, miR-302a-5p, miR-483-3p, miR-378h, miR-1271-5p, miR-128-3p, miR-582-3p, miR-29d-3p, miR-378c, miR-365a-5p, miR-145-3p, miR-133a-3p, miR-1306-5p, miR-410-3p, miR-486b-3p, miR-28-5p, miR-204-5p, miR-331-3p, miR-26c, miR-29b-3p, miR-135a-1-3p, miR-2284n, miR-34c-5p, miR-769, miR-370-3p, miR-141-3p, miR-7144-5p, miR-1814c, miR-485-5p, miR-10b-3p, miR-3154, miR-488-3p, miR-296-3p, miR-654-3p, miR-2483-5p, miR-363-5p, miR-130b-5p, miR-125a-5p, miR-1343-5p, miR-2285l, miR-330-3p, miR-544b, miR-432-5p, miR-2284d, miR-2285g, miR-130a-3p, miR-377-5p, miR-133b-5p, miR-2889, miR-30b-3p, miR-29b, miR-2284ab, miR-1260b, miR-873a-5p, miR-326-3p, miR-449a, miR-2428, miR-211, miR-24-3p, miR-3957-

MGAT5 ENSOARGO(mannosyl 3p, novel\_101, novel\_120, miR-342-3p, miR-135a-2-3p, miR-656-5p, miR-147-5p, miR-199c, miR-34c, miR-16a, miR-382-5p, miR-15a, miR-2404, miR-34b, miR-29a-3p, miR-320b, miR-378b, miR-195a-5p, miR-450b-3p, miR-1291, miR-19a-3p, miR-18a-3p, miR-2285ab, miR-2387, miR-146a-5p, miR-2432, miR-29b-1-5p, miR-130a-5p, miR-216c-5p, miR-30b-3p, miR-34b-5p, miR-221-5p, miR-21-3p, miR-2284m, miR-466i-5p, miR-760-3p, miR-185-3p, miR-125b, miR-671-3p, miR-151-5p, miR-532-3p, miR-148b-3p, miR-15a-5p, miR-3600, miR-378d, miR-19b-3p, miR-124-3p, miR-1197-5p, miR-140-3p, miR-5703, miR-362-3p, miR-206-3p, miR-1271, miR-378c, miR-424-5p, miR-708-5p, miR-664a, miR-320e, miR-22-3p, novel\_32, miR-204-3p, miR-544-3p, miR-193b-3p, miR-139-5p, miR-3065-3p, miR-221-5p, miR-545-3p, miR-378a-3p, miR-133b-3p, miR-27b-5p, miR-21a-3p, miR-193a, miR-30c-1-3p, let-7c-3p, miR-424-5p, miR-494-3p, miR-2285o, miR-3085-3p, novel\_124, miR-362-3p, miR-342, miR-326, miR-1306-5p, miR-7977

ATP13A2 ENSOARGO(ATPase t miR-7977

miR-16-5p, novel\_42, miR-378c, miR-2903, miR-1260b, miR-2433, miR-29b-3p, miR-28-5p, miR-486b-3p, miR-141-3p, miR-331-5p, miR-34c-5p, miR-365a-3p, miR-25-3p, miR-769, miR-3154, miR-23b, miR-301, miR-671-5p, miR-345-5p, miR-3064-5p, miR-4286, miR-200a, miR-2284a, miR-490-3p, miR-2285b, miR-92b-3p, miR-28b, miR-1260a, miR-6119-5p, miR-107, novel\_127, miR-92a-3p, miR-200a-3p, miR-181b-5p, miR-412, miR-2284z, miR-322-5p, miR-378h, miR-29d-3p, miR-7134-5p, miR-3591-5p, miR-193b-3p, miR-29c-3p, miR-449a, miR-24-3p, miR-34c, miR-16a, miR-15a, miR-28c, miR-142b, miR-92a-3p, miR-29a, miR-3120-3p, miR-26b-5p, miR-3074-5p, miR-6535, miR-34b, miR-29a-3p, miR-150-5p, miR-1306, miR-18a-3p, miR-195a-5p, miR-378f, miR-450b-3p, miR-107, miR-2483-5p, miR-628-5p, let-7f-2-3p, let-7f-2-3p, miR-130b-5p, miR-345-5p, miR-32, miR-126a-3p, miR-193a-3p, miR-26b-3p, miR-103a-3p, miR-103, miR-412-5p, miR-185-5p, miR-497-5p, miR-4508, miR-16b, miR-29b, miR-1260b, miR-378c, miR-4510, miR-3074-5p, miR-3184-5p, miR-769-5p, novel\_44, miR-98-3p, let-7b-3p, miR-708-5p, miR-874-5p, miR-424-5p, miR-129-5p, miR-130b-5p, miR-32-5p, miR-221-5p, miR-378a-3p, miR-204-3p, miR-15b-5p, miR-193b-3p, miR-6130, miR-27b-5p, let-7f-1-3p, miR-1895, miR-625-5p, miR-345-5p, miR-486-3p, miR-421-5p, miR-324-3p, miR-3601, miR-185-3p, miR-422a, miR-26a-5p, miR-221-5p, miR-34b-5p, miR-1277-5p, miR-18a-3p, miR-532-3p, miR-23b-3p, miR-23c, miR-15a-5p, miR-98-3p, miR-378a-3p, miR-378i, miR-34a-5p, let-7a-3p, miR-493-3p, miR-941, miR-452-5p, miR-181d-5p, let-7i-3p, miR-3059-5p, miR-2447, miR-363-3p, miR-423-5p, miR-361-3p, miR-877-3p, miR-769-5p, miR-3064-5p, miR-2319b, miR-1185-2-3p, miR-378e, miR-25, miR-2483-3p, miR-129b-5p, miR-381-3p, miR-361-3p, miR-23a-3p, miR-676-3p, miR-1388-3p, miR-424-5p, miR-378d, miR-505, miR-2957, miR-16b, novel\_115, miR-1306-

miR-329a, miR-329b, miR-767, miR-2474, miR-424-3p, miR-30e-5p, miR-2355-5p, miR-1197-3p, miR-1260b, miR-16-5p, miR-193a-5p, miR-196a-5p, miR-330-5p, miR-23b-5p, miR-1343-5p, miR-758-5p, miR-322-5p, novel\_121, miR-2284z, miR-429-3p, miR-6517, miR-1224-5p, novel\_79, miR-412, let-7f-5p, miR-200a-3p, novel\_96, miR-219-3p, miR-205-5p, miR-3956-5p, miR-450c-5p, let-7g, miR-200a, novel\_39, let-7e-5p, miR-378f, miR-3065-5p, miR-216a-3p, miR-3970, miR-150-5p, miR-1306, miR-669, miR-216b-3p, miR-206, miR-6123, miR-625-3p, miR-28c, miR-4324, miR-335-5p, miR-16b, miR-497-5p, miR-7b-5p, miR-2113, miR-432, novel\_23, miR-197-3p, miR-3431, miR-3535, miR-31-5p, miR-339-5p, miR-196b-5p, miR-378a-5p, miR-377-3p, miR-7-5p, novel\_51, miR-432-3p, let-7j, miR-6240, miR-493-5p, miR-380-5p, let-7f-2-3p, let-7f-2-3p, miR-628-5p, miR-339b, miR-1827, miR-625-5p, miR-299, miR-30d-5p, miR-10a, miR-377-3p, let-7i-5p, miR-15b-5p, miR-548o-3p, miR-2331-3p, miR-296-3p, miR-154a-3p, novel\_74, miR-669a-3p, miR-4492, let-7f, miR-219b-3p, miR-769-5p, let-7b, miR-433-5p, miR-214, miR-665-5p, miR-142-3p, miR-218-1-3p, miR-193b-5p, miR-1961, miR-378i, miR-378a-3p, miR-2284h-5p, miR-98-5p, miR-202-5p, let-7k, miR-3653-3p, miR-122-3p, miR-422a, miR-500a-5p, miR-2424, miR-487a, miR-2285w, miR-493-5p, miR-1185-2-3p, miR-4443, miR-203-3p, miR-139-5p, miR-499a-5p, miR-154-3p, miR-218-5p, miR-1285-5p, miR-3956-3p, miR-2447, miR-6527, miR-362-3p, miR-1388-5p, miR-329-3p, miR-1a-3p, miR-147a, miR-425-3p, miR-1185-3p, miR-2459, miR-548w, miR-330-3p, miR-491-5p, miR-214-3p, miR-103a-2-5p, miR-16b, miR-505, miR-29b-1-5p, miR-378d, miR-2310, miR-671-5p, miR-1814c, miR-485-5p, miR-23a-5p, novel\_48, miR-503-3p, miR-2448-3p, miR-381-3p, miR-362-5p, miR-769, miR-487a-3p, miR-141-3p, miR-615-5p, miR-370-3p, miR-767-5p, miR-138-5p, miR-135a-1-3p, miR-410-5p, miR-410-5p, miR-210-5p, miR-500a-5p, miR-324-3p, miR-17-3p, miR-378a-5p, miR-17-3p, miR-193a-3p, miR-3059-5p, miR-193b-3p, miR-3957-3p, miR-17-3p, let-7j, miR-1271-3p, miR-484, miR-1434-3p, miR-3154, miR-33b-3p, miR-2284x, miR-378d, miR-2285aa, miR-1271, miR-2404, miR-193b-3p

miR-206-3p, miR-98-3p, miR-3184-5p, miR-122-5p, miR-3074-5p, miR-2330-3p, miR-6516-3p, miR-17-3p, miR-664a, miR-130b-5p, miR-487a-5p, miR-454-3p, miR-708-5p, miR-208b-5p, miR-2285j, let-7b-3p, miR-665, miR-3604, miR-664a-5p, miR-320e, miR-324-3p, miR-151-3p, miR-139-5p, miR-192-5p, miR-301a-3p, miR-22-3p, novel\_32, miR-204-3p, miR-548o-3p, miR-532-5p, miR-216b-3p, novel\_99, miR-625-5p, miR-411, miR-130a-5p, miR-2432, miR-760-3p, miR-2284m, miR-320d, miR-1277-5p, novel\_17, miR-196a-3p, miR-500a-5p, miR-148b-3p, miR-7859, miR-383-5p, miR-532-3p, novel\_83, miR-548e-3p, miR-4429, novel\_73, miR-142-3p, miR-19b-3p, miR-2284u, miR-218-1-3p, miR-2300b-3p, miR-362-3p, miR-215-5p, miR-5703, miR-98-3p, miR-124-3p, miR-1285-5p, miR-423-5p, miR-541-3p, miR-885-5p, miR-212-3p, miR-2447, miR-2284j, miR-194b-5p, miR-499a-5p, miR-2284q, miR-7134-3p, miR-374a-3p, miR-2440, miR-218-5p, miR-2285n, miR-301a-5p, miR-2285y, miR-371a-5p, miR-2483-3p, miR-378g, miR-4443, miR-203-3p, miR-2284g, miR-139-5p, miR-24-1-5p, miR-7977, miR-211-5p, miR-2285u, miR-668-5p, miR-136-5p, miR-381-3p, miR-2330-5p, miR-101b-3p, miR-124a, miR-1388-3p, miR-376b, miR-2284b, miR-130b-3p, miR-320b, miR-323b-3p, miR-505, miR-362-3p, miR-2320-3p, miR-2459, miR-455-3p, miR-548w, miR-330-3p, miR-151a-3p, miR-450b-5p, miR-362-3p, miR-3120-5p, miR-21b, miR-2284aa, miR-301b-5p, miR-541, miR-484, miR-329-3p, miR-30b-3p, miR-323b, miR-1a-3p, miR-412-3p, miR-374a-3p, miR-1260b, miR-323-3p, miR-145-3p, miR-2284v, miR-3607-3p, miR-6128, miR-204-5p, miR-374b-3p, miR-592, miR-28-5p, miR-29b-3p, miR-2284k, miR-135a-5p, miR-144, miR-100-3p, miR-154b-5p, miR-2284n, miR-133c, miR-574-5p, miR-215-5p, miR-2285aa, miR-2355-5p, miR-329a, miR-485-5p, miR-1248, miR-381-3p, miR-320a, miR-24-2-5p, miR-2284a, miR-2284v, miR-1, miR-191-3p, miR-127-5p, miR-17-1, miR-103a-2-5p, miR-3074-1-3p, novel\_1, miR-107-5p, miR-2355-5p, miR-885-5p

DDX6 ENSOARGO( DEAD (As

CNBD1 ENSOARGO( cyclic n

miR-330-5p, miR-23b-5p, miR-18b-5p, miR-423-3p, miR-6517, novel\_121, miR-322-5p, miR-205-5p, novel\_127, miR-2898, miR-4286, miR-3064-5p, miR-490-3p, novel\_39, miR-28b, miR-24-2-5p, miR-18a, miR-362-5p, miR-200a-5p, miR-671-5p, miR-485-5p, miR-23a-5p, miR-125a, miR-2355-5p, miR-769, miR-300-3p, miR-125b-5p, miR-370-5p, miR-410-5p, miR-2433, miR-486b-3p, miR-16-5p, miR-500b-5p, miR-22-3p, miR-744-5p, miR-497-5p, miR-30b-3p, miR-16b, miR-130a-3p, miR-149-5p, miR-194-3p, miR-134-3p, miR-503-5p, miR-330-3p, miR-3141, miR-146a, miR-503-5p, miR-660, miR-125a-5p, miR-668-3p, miR-363-5p, miR-6240, miR-3141, miR-18b, miR-2387, miR-195a-5p, miR-9851-3p, miR-2319a, miR-146b-5p, novel\_68, miR-181b-3p, miR-669, miR-677, miR-323a-5p, miR-146b-3p, miR-16a, miR-28c, miR-15a, miR-1193, miR-301b-3p, miR-2428, miR-326-3p, miR-371b-3p, miR-24-3p, miR-188-3p, miR-1197-5p, miR-5703, miR-2366, miR-133a-3p, miR-3960, miR-532-3p, miR-15a-5p, miR-125b, miR-185-3p, miR-324-3p, miR-196a-3p, miR-760-3p, miR-466i-5p, miR-503-5p, miR-486-3p, miR-146a-5p, miR-181b-1-3p, miR-129b-3p, miR-1827, miR-18a-5p, miR-370-5p, miR-660-5p, miR-504-5p, miR-15b-5p, miR-22-3p, miR-323-5p, miR-2284s, miR-301a-3p, miR-665, miR-132-5p, miR-324-3p, miR-2285j, miR-4492, miR-424-5p, miR-454-3p, miR-664a, miR-214, miR-145a-3p, miR-769-5p, miR-30b-3p, miR-484, novel\_4, miR-330-3p, miR-2300a-5p, miR-1343-3p, miR-500-5p, miR-216a-3p, miR-16b, miR-326, miR-214-3p, miR-146b, miR-130b-3p, miR-3085-3p, miR-424-5p, miR-4532, miR-361-3p, miR-877-3p, miR-504, miR-668-5p, miR-7977, miR-24-1-5p, miR-4792, miR-3064-5p, miR-4443, miR-378g, miR-769-5p, miR-2440, miR-4726-5p, miR-361-3p, miR-362-5p

miR-21b, miR-101c, miR-758-3p, miR-323b, miR-147a, miR-118b-3p, miR-455-3p, miR-148b-5p, miR-1343-3p, miR-181b-2-3p, miR-487b-5p, miR-491-5p, miR-103a-2-5p, miR-199b-5p, miR-16b, miR-323b-3p, miR-378d, miR-744-3p, miR-504, miR-1983, miR-493-5p, miR-378j, miR-378g, miR-3596, miR-1185-2-3p, miR-4443, miR-2319b, miR-2284g, miR-211-5p, miR-2285u, miR-499a-5p, novel\_82, novel\_111, miR-1285-5p, miR-3956-3p, miR-2447, miR-34a-5p, miR-2284u, miR-148a-5p, miR-133a-3p, miR-193b-5p, miR-2366, miR-378i, miR-378a-3p, miR-2284h-5p, miR-212-5p, miR-202-5p, miR-345-3p, miR-422a, miR-500a-5p, miR-181b-1-3p, miR-486-3p, miR-2424, miR-2285w, miR-345-3p, miR-1827, miR-186-5p, miR-625-5p, miR-129b-3p, miR-216b-5p, miR-10a, miR-582-5p, miR-377-3p, miR-301a-3p, miR-15b-5p, miR-504-5p, miR-296-3p, miR-552-3p, miR-216b-3p, miR-4492, miR-454-3p, miR-2285j, miR-665, miR-769-5p, miR-142a-5p, miR-6525, miR-16b, miR-4508, miR-497-5p, miR-2113, miR-223-3p, miR-7b-5p, miR-432, novel\_23, miR-197-3p, miR-134-3p, miR-3431, miR-412-5p, miR-149-5p, miR-103a-3p, miR-3955-5p, miR-31-5p, miR-340-3p, miR-377-3p, miR-296-3p, miR-7-5p, miR-2411-3p, miR-105-5p, miR-432-3p, miR-2285r, miR-432-3p, miR-493-5p, miR-628-5p, miR-412-3p, miR-378f, miR-2319a, miR-148a-3p, miR-3065-5p, miR-374c-3p, miR-181b-3p, miR-677, miR-216b-3p, novel\_68, miR-301b-3p, miR-199b-5p, miR-155-5p, miR-330-5p, miR-23b-5p, miR-2427, miR-322-5p, miR-486-5p, novel\_121, miR-2284z, miR-134-5p, miR-429-3p, miR-2285ad, miR-1224-5p, miR-412, miR-152-3p, novel\_96, miR-125a-3p, miR-2284y, novel\_39, miR-29a-5p, miR-876-3p, miR-331-5p, miR-223-5p, miR-503-3p, miR-125a, miR-542-5p, miR-2355-5p, miR-331-5p, miR-134-5p, miR-6740-5p, miR-125b-5p, miR-1197-3p, miR-1260b, miR-16-5p, miR-450b-5p, miR-378c, miR-3120-5p, miR-2284aa, miR-10b, miR-143-5p, miR-378b, miR-30b-

let-7c-5p, miR-339a, miR-217, miR-125a-3p, miR-1260a, miR-205-5p, miR-2285af, miR-200a-3p, let-7f-5p, miR-2898, miR-30a-3p, miR-490-3p, miR-450c-5p, miR-1271-3p, miR-200a, let-7g, novel\_39, miR-380-5p, miR-450b-5p, miR-28b, miR-134, miR-3591-5p, miR-345-3p, miR-10a-5p, let-7d, novel\_79, miR-299a-3p, miR-134-5p, miR-450a-1-3p, miR-483-3p, miR-409-3p, miR-125b-5p, miR-5100, miR-374b-3p, miR-134-5p, miR-28-5p, miR-204-5p, miR-138-5p, miR-3607-3p, miR-1306-5p, miR-374a-3p, miR-1260b, miR-2448-3p, miR-671-5p, miR-1248, miR-485-5p, miR-7144-5p, miR-141-3p, miR-125a, miR-2355-5p, miR-769, miR-2411-3p, miR-197-5p, miR-296-3p, miR-224-5p, miR-503-5p, miR-125a-5p, miR-483-3p, miR-130b-5p, miR-380-5p, miR-503-3p, miR-296-3p, miR-22841, miR-2285r, miR-145a-5p, novel\_23, miR-3071-5p, miR-197-3p, miR-450c-3p, miR-223-3p, miR-653, miR-188-5p, miR-26a-2-3p, miR-1260b, miR-138, miR-339-5p, miR-2355-3p, miR-544b, miR-503-5p, let-7g-5p, let-7i, novel\_87, miR-6402, miR-28c, miR-147-5p, miR-335-5p, novel\_27, miR-24-3p, miR-211, miR-2387, miR-2285ab, let-7e-5p, miR-505-3p, miR-2319a, miR-412-3p, miR-10a-5p, miR-320b, novel\_69, miR-670-3p, miR-299b-3p, miR-146b-3p, miR-125b, miR-345-3p, miR-92a-1-5p, miR-216a-5p, miR-219b-5p, miR-2285p, miR-196a-3p, miR-21-3p, miR-299-3p, let-7k, miR-98-5p, miR-503-5p, miR-105-3p, miR-216c-5p, miR-217-5p, miR-1197-5p, miR-124-3p, miR-1961, miR-2408, novel\_133, miR-218-1-3p, miR-33b-3p, miR-493-3p, miR-505-3p, miR-30d-3p, miR-532-3p, novel\_83, miR-320e, miR-665, miR-132-5p, miR-30a-3p, miR-30e-3p, let-7f, miR-130b-5p, miR-708-5p, miR-664a, miR-450b-3p, miR-214, miR-2330-3p, let-7b, let-7b-5p, miR-224-5p, miR-769-5p, miR-10b-5p, miR-450a-1-3p, miR-21a-3p, miR-339b, miR-552-3p, miR-296-3p, miR-182-5p, let-7i-5p, novel\_32, miR-544-3p, miR-10a, miR-132-5p, miR-182-5p, let-7a, miR-214-3p, miR-



miR-2285ad, miR-7641, miR-30d-3p, miR-199a-3p, miR-376a-5p, miR-1246, miR-23b-5p, miR-330-5p, miR-217-5p, miR-142-3p, miR-4429, miR-16-1-3p, miR-133a-3p, miR-34a-5p, miR-329a-5p, miR-195a-3p, miR-181a-2-3p, miR-2478, miR-181b-1-3p, miR-29a-5p, miR-486-3p, miR-490-3p, miR-2285af, miR-205-5p, miR-2397-5p, miR-618, miR-30c-2-3p, miR-219b-5p, miR-92a-1-5p, miR-217, miR-320d, miR-202-5p, miR-6536, miR-181b-5p, miR-34b-5p, miR-543-5p, miR-30c-1-3p, miR-548o-3p, miR-182-5p, miR-34c-5p, miR-139-5p, miR-769, novel\_25, miR-137-3p, miR-500a-3p, miR-320a, miR-433-3p, miR-3154, miR-7144-5p, miR-543-3p, miR-1814c, novel\_99, miR-186-5p, miR-3607-3p, miR-769-5p, miR-224-5p, miR-122-5p, miR-145-3p, miR-181c-5p, miR-5100, miR-30e-3p, miR-324-3p, miR-129-5p, miR-500, miR-486b-3p, miR-199b-3p, miR-409b, miR-665, miR-222-5p, miR-181b-2-3p, miR-185-5p, miR-194-3p, miR-2355-3p, miR-6529a, miR-181a-5p, novel\_23, miR-194-5p, miR-3071-5p, miR-16-1-3p, miR-188-5p, miR-382-3p, miR-668-3p, miR-628-5p, miR-652-5p, miR-432-3p, miR-30c-1-3p, miR-2310, miR-199a-3p, miR-224-5p, miR-320b, miR-326, miR-197-5p, miR-182-5p, miR-194a, miR-124-5p, miR-466f-3p, miR-103a-2-5p, miR-139-5p, miR-20a-3p, miR-329-5p, miR-374c-3p, miR-34b, miR-677, miR-320c, miR-181b-3p, miR-378b, miR-136-5p, miR-2319a, miR-194b-5p, miR-2285x, miR-181d-5p, miR-24-3p, miR-449a, miR-326-3p, miR-2284w, miR-2285n, miR-769-5p, miR-34c, miR-107-5p, miR-490-5p, miR-199c

miR-424-5p, let-7a-5p, miR-33a-5p, miR-30c-1-3p, miR-16b, miR-2957, miR-130b-3p, let-7e, miR-199b-5p, miR-330-3p, miR-2300a-5p, miR-222-5p, miR-376b-3p, miR-539-5p, miR-425-3p, miR-421, miR-455-3p, miR-148b-5p, miR-541, miR-125b-2-3p, miR-101a-5p, miR-1388-5p, miR-101c, miR-1839-5p, miR-541-3p, miR-3059-5p, miR-181d-5p, miR-154a, miR-423-5p, miR-218-5p, novel\_82, miR-382-3p, miR-2285y, miR-450a-5p, miR-499a-5p, miR-3968, miR-2284q, miR-490-5p, miR-7977, miR-499b-5p, miR-3082-5p, miR-499a-3p, miR-376d, let-7d-5p, miR-199b-5p, miR-668-5p, miR-376a-3p, miR-329a-5p, miR-2411, novel\_17, miR-2285p, miR-92a-1-5p, miR-185-3p, miR-98-5p, miR-466i-5p, miR-202-5p, let-7k, miR-1277-5p, miR-548e-3p, miR-18a-3p, miR-212-5p, miR-222-5p, miR-15a-5p, miR-7859, miR-383-5p, miR-2300b-3p, miR-1961, miR-2366, miR-191, miR-5703, miR-1197-5p, miR-148a-5p, miR-3074-5p, let-7b, miR-539-5p, miR-2330-3p, miR-6525, miR-181c-5p, let-7b-5p, miR-3184-5p, let-7f, miR-338-5p, miR-1843b-3p, miR-6516-3p, miR-17-3p, miR-664a, miR-129-5p, miR-708-5p, miR-424-5p, miR-454-3p, miR-496-3p, miR-660-5p, miR-548o-3p, miR-30c-1-3p, miR-296-3p, miR-21-3p, miR-499b-3p, miR-301a-3p, let-7i-5p, miR-15b-5p, miR-129b-3p, miR-345-5p, miR-133b-3p, novel\_99, miR-186-5p, miR-6240, miR-432-3p, miR-345-5p, novel\_51, miR-330-3p, miR-660, miR-31-5p, miR-3955-5p, miR-130a-3p, miR-3431, let-7g-5p, miR-432-5p, miR-2355-3p, novel\_116, miR-6238, miR-1434-3p, miR-1843b-5p, miR-181a-5p, miR-432, miR-374b-3p, novel\_23, miR-219a-1-3p, miR-16b, miR-6239, miR-497-5p, novel\_120, miR-135a-2-3p, miR-2285x, miR-17-3p, miR-3957-3p, miR-301b-3p, miR-199b-5p, miR-502-5p, miR-15a, let-7i, miR-382-5p, miR-16a, miR-22-5p, miR-3074-5p, miR-329-5p, miR-374c-3p, miR-411b-3p, miR-3591-3p, miR-376b-3p, miR-18a-3p, miR-378b, miR-105a-5p, miR-370-

|       |                   |                                                                                                                                                                                                                                                                                                                                                                                                                                                                                                                                                                                                                                                                                                                                                                                                                                                                                                                                                                                                                                                                                                                                                                                                                                                                                                                                                                                                                                                                                                                                                                                                                                                                                                                                                                                                                       |
|-------|-------------------|-----------------------------------------------------------------------------------------------------------------------------------------------------------------------------------------------------------------------------------------------------------------------------------------------------------------------------------------------------------------------------------------------------------------------------------------------------------------------------------------------------------------------------------------------------------------------------------------------------------------------------------------------------------------------------------------------------------------------------------------------------------------------------------------------------------------------------------------------------------------------------------------------------------------------------------------------------------------------------------------------------------------------------------------------------------------------------------------------------------------------------------------------------------------------------------------------------------------------------------------------------------------------------------------------------------------------------------------------------------------------------------------------------------------------------------------------------------------------------------------------------------------------------------------------------------------------------------------------------------------------------------------------------------------------------------------------------------------------------------------------------------------------------------------------------------------------|
| TMC01 | ENSOARGO(transmem | <p>miR-199b-5p, miR-378j, miR-299b-5p, miR-493-5p, miR-1983, miR-20a-3p, miR-499b-5p, miR-2285u, miR-211-5p, miR-378g, miR-499a-3p, miR-3596, miR-3082-5p, miR-371a-5p, miR-3968, miR-3964, miR-3059-5p, miR-877-3p, novel_111, miR-6529a, miR-412-3p, miR-758-3p, miR-299a-5p, miR-3120-5p, miR-409b, miR-539-5p, miR-9788-3p, miR-320b, novel_103, miR-16b, miR-199b-5p, miR-146b, miR-214-3p, miR-1388-3p, miR-2330-5p, miR-424-5p, miR-1b-5p, miR-299, miR-21a-3p, miR-18a-5p, miR-140-5p, miR-216b-3p, miR-27a-5p, miR-499b-3p, miR-377-3p, novel_32, miR-22-3p, miR-15b-5p, miR-324-3p, miR-19b-1-5p, miR-29b-2-5p, miR-6516-3p, miR-424-5p, miR-3074-5p, miR-214, miR-6525, novel_133, miR-2366, miR-2904, miR-5703, miR-188-3p, miR-4429, miR-340-5p, miR-15a-5p, miR-2284h-5p, novel_17, miR-320d, miR-21-3p, miR-183-5p, miR-2285w, miR-146a-5p, miR-2432, miR-18b, miR-412-3p, miR-146b-5p, miR-135b-5p, miR-195a-5p, novel_68, miR-3074-5p, miR-374c-3p, miR-320c, miR-144-3p, miR-6535, miR-15a, miR-28c, miR-16a, miR-33a-3p, novel_87, miR-6119-3p, miR-22-5p, miR-656-5p, miR-1a-1-5p, miR-211, novel_27, miR-2284w, miR-199b-5p, miR-708-3p, miR-873a-5p, miR-19b-2-5p, miR-7b-5p, miR-22-3p, miR-197-3p, miR-374b-3p, miR-16b, miR-497-5p, miR-7862, miR-2284x, miR-31-5p, miR-3955-5p, miR-134-3p, miR-7-5p, miR-377-3p, miR-146a, miR-1343-5p, miR-493-5p, miR-18a, miR-320a, miR-7144-5p, miR-671-5p, miR-574-5p, miR-141-3p, miR-374c-3p, miR-199a-5p, miR-1-5p, miR-144, miR-331-3p, miR-135a-5p, novel_9, miR-204-5p, miR-374b-3p, miR-16-5p, miR-3607-3p, miR-1197-3p, miR-374a-3p, miR-1343-5p, miR-412, miR-18b-5p, miR-322-5p, miR-205-5p, miR-30f, miR-28-3p, miR-6536, miR-1a-2-5p, miR-200a-3p, miR-29b-2-5p, miR-4286, miR-181a-2-3p, miR-28b, miR-450b-5p, miR-2478, miR-199a-5p</p> |
| HID1  | ENSOARGO(HID1 dom | <p>novel_32, novel_127, miR-324-3p, miR-18a-3p, miR-7977, miR-18a-3p</p>                                                                                                                                                                                                                                                                                                                                                                                                                                                                                                                                                                                                                                                                                                                                                                                                                                                                                                                                                                                                                                                                                                                                                                                                                                                                                                                                                                                                                                                                                                                                                                                                                                                                                                                                              |

miR-379-3p, miR-206, miR-4324, miR-374c-5p, miR-758-5p, miR-2319a, let-7e-5p, miR-3065-5p, miR-411b-3p, miR-144-3p, novel\_68, miR-329-5p, miR-3120-3p, miR-378a-5p, miR-2411-3p, miR-194a, novel\_51, miR-2285r, let-7j, let-7a-2-3p, let-7f-2-3p, let-7f-2-3p, miR-16-1-3p, miR-2284x, miR-19b-2-5p, miR-450c-3p, miR-134-3p, miR-3431, miR-194-3p, miR-3955-5p, miR-339-5p, novel\_63, miR-2284k, miR-125b-5p, miR-2284v, miR-193a-5p, miR-20b-5p, miR-30e-5p, miR-301, miR-93-5p, miR-376c-3p, miR-874-3p, miR-2355-5p, miR-125a, let-7f-5p, miR-6536, novel\_127, miR-200a-3p, miR-148b-5p, miR-450b-5p, let-7g, miR-200a, miR-2284y, miR-2285b, miR-450c-5p, miR-23b-5p, miR-450a-1-3p, miR-2285ad, miR-429-3p, miR-6517, miR-412, novel\_79, miR-218-5p, miR-101-3p, miR-2440, miR-423-5p, miR-3956-3p, miR-2284j, miR-96-5p, miR-299b-5p, miR-409-5p, miR-378j, miR-381-3p, miR-3596, miR-378g, miR-2483-3p, miR-1185-2-3p, miR-2284g, miR-139-5p, miR-2285u, miR-130b-3p, miR-153-3p, miR-214-3p, miR-29b-1-5p, miR-323b-3p, miR-106b-5p, miR-182-5p, miR-1b-5p, miR-101b-3p, miR-2284b, miR-1839-5p, miR-101c, miR-21b, miR-323b, miR-1a-3p, miR-758-3p, miR-153, miR-496-5p, miR-539-5p, miR-148b-5p, miR-455-3p, miR-1185-3p, miR-199b-3p, novel\_78, miR-1343-3p, miR-145b, miR-454-3p, miR-1468-5p, miR-130b-5p, let-7f, miR-2285j, miR-151-3p, miR-3604, miR-224-5p, miR-3184-5p, let-7b, miR-214, miR-339b, miR-450a-1-3p, miR-129b-3p, miR-433-3p, miR-30d-5p, miR-10a, miR-376e-3p, miR-216b-5p, let-7i-5p, miR-98-5p, let-7k, miR-210-5p, miR-345-3p, miR-2285i, miR-376a-5p, miR-376c-3p, miR-33b-3p, novel\_73, miR-184-3p, miR-16-1-3p, miR-2284u, miR-1961, miR-1434-5p, miR-7859, miR-328-3p, miR-18a-3p, miR-106a, miR-380-5p, miR-128-1-5p, novel\_1, miR-656-5p, miR-22-5p, miR-502b, miR-147-5p, miR-199c, miR-20a-5p, let-7i, miR-33a-3p, novel\_27, miR-17-3p, miR-2285k, miR-6395, miR-

miR-483-3p, miR-1343-5p, miR-193a-3p, miR-466f-3p, miR-146a, miR-365b-5p, novel\_51, miR-2411-3p, miR-2285r, miR-2284l, miR-130b-5p, miR-380-5p, miR-493-5p, miR-2483-5p, miR-138, miR-16b, miR-1260b, miR-497-5p, miR-1285, miR-181a-5p, miR-223-3p, miR-374b-3p, miR-103, miR-103a-3p, miR-26b-3p, miR-22-5p, miR-656-5p, miR-15a, miR-133a-5p, miR-485-3p, miR-16a, miR-326-3p, miR-3957-3p, miR-193b-3p, miR-107, miR-146b-5p, miR-195a-5p, miR-6395, miR-505-3p, miR-376a-2-5p, miR-6516-3p, miR-2285ab, miR-1306, miR-216a-3p, miR-18a-3p, miR-378b, miR-670-3p, miR-374c-3p, miR-6535, miR-216b-3p, miR-378b, miR-329-5p, miR-26b-5p, miR-181b-5p, miR-107, novel\_127, miR-200a-3p, miR-1260a, miR-380-5p, miR-1957a, miR-2385-3p, miR-30a-3p, miR-181a-2-3p, miR-4286, miR-128-3p, miR-345-3p, miR-3591-5p, miR-1343-5p, miR-330-5p, miR-322-5p, miR-758-5p, miR-483-3p, miR-545-5p, miR-129-1-3p, novel\_121, miR-486-5p, miR-376a-5p, miR-138-5p, miR-331-5p, miR-410-3p, miR-34c-3p, miR-331-3p, miR-1260b, miR-365a-5p, miR-16-5p, miR-10a-3p, miR-329b, miR-331-5p, miR-2448-3p, miR-331-5p, miR-374c-3p, miR-3959-5p, miR-3068-3p, miR-141-3p, miR-1271, miR-146b, miR-326, miR-1306-5p, miR-2957, miR-505, miR-16b, miR-8485, miR-491-3p, miR-1b-5p, miR-2330-5p, miR-424-5p, miR-33a-5p, miR-21b, miR-101c, miR-484, miR-541, miR-9788-3p, miR-409b, miR-151a-3p, miR-548w, miR-3958-3p, miR-3968, miR-541-3p, miR-2285f, miR-181d-5p, miR-493-5p, miR-140-5p, miR-2483-3p, miR-3082-5p, miR-7689-3p, miR-1277-5p, miR-26a-5p, miR-345-3p, miR-92a-1-5p, miR-146a-5p, miR-143-3p, miR-10a-3p, miR-183-5p, miR-329a-5p, miR-664-5p, miR-2366, miR-2904, miR-140-3p, miR-5703, miR-487a-3p, miR-340-5p, miR-15a-5p, miR-532-3p, miR-328-3p, miR-18a-3p, miR-30d-3p, miR-485-3p, miR-505-3p, miR-6516-3p, miR-424-5p, miR-130b-5p, miR-30a-3p, miR-151-3p, miR-30a-3p, miR-

miR-361-3p, miR-3082-5p, miR-452-3p, miR-20a-3p, miR-7977, miR-2284q, miR-30b-5p, miR-371a-5p, miR-362-5p, miR-212-3p, miR-181d-5p, miR-2285f, miR-3120-5p, miR-6529a, miR-484, miR-30b-3p, miR-125b-2-3p, miR-412-3p, miR-2285e, miR-9788-3p, miR-500-5p, miR-221-3p, miR-151a-3p, novel\_4, miR-3955-3p, miR-326, miR-320b, miR-382-3p, miR-33a-5p, miR-30f, miR-2312, miR-323-5p, miR-27a-5p, miR-155-5p, miR-532-5p, miR-155-5p, miR-6516-3p, miR-222-3p, miR-29b-2-5p, miR-320e, miR-539-5p, miR-3074-2-3p, miR-4429, miR-376a-5p, miR-5703, miR-140-3p, miR-200b, miR-148b-3p, miR-760-3p, miR-466i-5p, miR-320d, miR-21-3p, miR-34b-5p, miR-30d, miR-1277-5p, miR-30b-3p, miR-125b, miR-185-3p, miR-125b-2-3p, miR-29b-1-5p, miR-183-5p, miR-2285k, miR-1291, miR-376a-2-5p, miR-2285ab, miR-29a-3p, miR-34b, miR-323a-5p, miR-378b, miR-320b, novel\_1, miR-92a-3p, miR-22-5p, miR-656-5p, miR-33a-3p, miR-34c, miR-371b-3p, miR-211, miR-2428, novel\_27, miR-326-3p, miR-449a, miR-135a-2-3p, miR-219a-1-3p, miR-30b-3p, miR-29b, miR-1434-3p, miR-181a-5p, miR-653, miR-2285g, miR-125a-5p, miR-224-5p, miR-330-3p, miR-345-5p, miR-671-5p, miR-7144-5p, miR-3074-1-3p, miR-488-3p, miR-362-5p, miR-3154, miR-320a, miR-34c-5p, miR-141-3p, miR-370-3p, miR-486b-3p, miR-204-5p, miR-29b-3p, miR-1306-5p, miR-6128, miR-200b-3p, miR-134, miR-345-3p, miR-30a-5p, miR-218-2-3p, miR-29d-3p, miR-483-3p, miR-545-5p, miR-222, miR-376a-5p, miR-7641, miR-200c-3p, miR-181b-5p, miR-450a-2-3p, miR-92a-3p, miR-200c, miR-217, miR-2478, miR-490-3p, miR-2284a, miR-1271-3p, miR-376c-5p, miR-376b-5p, miR-30a-3p, miR-29b-2-5p, miR-136-5p, miR-504, miR-544-5p, miR-9-3p, miR-1983, miR-221, miR-2483-3p, miR-3596, miR-378g, miR-25, miR-203-3p, miR-2319b, miR-4792, miR-211-5p, miR-7689-3p, miR-2440, novel\_82, miR-301a-5p, miR-1985-5p, miR-363-3p, miR-1839-5p, miR-101c, miR-301b-5p, miR-

miR-206, miR-4324, miR-485-3p, miR-199b-5p, miR-2285m, miR-376a-3p, miR-335-5p, miR-193b-3p, miR-1839-3p, miR-412-3p, miR-378f, miR-148a-3p, miR-216a-3p, miR-299b-3p, miR-669, miR-3120-3p, miR-483-3p, miR-106b-3p, miR-193a-3p, miR-432-3p, miR-2284l, miR-432-3p, miR-628-5p, miR-16b, miR-497-5p, miR-27b-3p, miR-432, miR-197-3p, miR-450c-3p, novel\_23, miR-134-3p, miR-149-5p, miR-194-3p, miR-31-5p, miR-103a-3p, miR-1260b, miR-1197-3p, miR-16-5p, miR-345-5p, miR-137-3p, miR-574-5p, miR-874-3p, miR-2355-5p, miR-1271, miR-6536, novel\_127, novel\_96, miR-200a-3p, miR-152-3p, miR-125a-3p, novel\_39, miR-29a-5p, miR-3064-5p, miR-1290, miR-322-5p, miR-505-5p, miR-450a-1-3p, novel\_121, miR-129-1-3p, miR-299a-3p, miR-2285ad, miR-6517, miR-1224-5p, miR-412, miR-18b-5p, novel\_82, miR-2440, miR-361-3p, miR-877-3p, miR-423-5p, miR-7705, miR-2447, miR-299b-5p, miR-504, miR-1983, miR-140-5p, miR-499a-3p, miR-378g, miR-3596, miR-4792, miR-7689-3p, miR-1185-5p, miR-491-5p, miR-199b-5p, miR-214-3p, miR-199a-3p, novel\_19, miR-29b-1-5p, miR-16b, miR-378d, miR-8485, miR-2284r, miR-541, miR-758-3p, miR-1298-3p, miR-421, miR-199b-3p, miR-1343-3p, miR-4492, miR-500, miR-130b-5p, miR-2285j, miR-151-3p, miR-3604, miR-665, miR-769-5p, miR-224-5p, miR-346, miR-3184-5p, miR-129-2-3p, miR-665-5p, miR-214, miR-345-5p, miR-1895, miR-625-5p, miR-299, miR-450a-1-3p, miR-500a-3p, miR-499b-3p, miR-151b, miR-15b-5p, miR-30c-1-3p, miR-504-5p, miR-202-5p, miR-500a-5p, miR-324-3p, miR-422a, miR-376a-5p, miR-486-3p, miR-2285w, miR-142-3p, miR-33b-3p, miR-133a-3p, miR-218-1-3p, miR-378i, miR-378a-3p, miR-2284h-5p, miR-1247-5p, miR-18a-3p, miR-212-5p, miR-128-1-5p, miR-147-5p, miR-199c, miR-15a, miR-133a-5p, miR-6402, miR-16a, miR-382-5p, miR-24-3p, miR-3959-3p, miR-371b-3p, miR-2428, miR-3957-3p, novel\_101, miR-1103, miR-17-3p, miR-10a-5p, miR-34b, miR-670-3p, miR-2404, miR-323a-5p, miR-

MUM1 ENSOARGO(melanoma)

MFAP2 ENSOARGO(microfib)

miR-145b, miR-1343-3p, miR-330-3p, miR-148b-5p, miR-147a, miR-758-3p, miR-301b-5p, miR-1388-5p, miR-23a-3p, miR-127-3p, miR-1388-3p, miR-574-3p, miR-2310, miR-16b, novel\_19, miR-103a-2-5p, miR-146b, miR-2319b, miR-139-5p, miR-4443, miR-378g, miR-378j, miR-544-5p, miR-1983, miR-504, miR-299b-5p, miR-6527, miR-2447, novel\_111, miR-301a-5p, miR-218-5p, miR-3968, miR-212-5p, miR-18a-3p, miR-328-3p, miR-23c, miR-23b-3p, miR-210-3p, miR-7859, miR-361-5p, miR-148a-5p, miR-16-1-3p, miR-33b-3p, miR-345-3p, miR-503-5p, miR-329a-5p, miR-486-3p, miR-324-3p, miR-26a-5p, novel\_17, miR-216b-3p, miR-548o-3p, miR-504-5p, miR-2331-3p, miR-15b-5p, miR-30d-5p, miR-450a-1-3p, miR-625-5p, miR-885-3p, miR-3958-5p, miR-129-2-3p, miR-3074-5p, miR-224-5p, miR-6525, miR-769-5p, miR-665, miR-103a-3p, miR-31-5p, miR-149-5p, miR-134-3p, novel\_23, miR-450c-3p, miR-22-3p, miR-2113, miR-7b-5p, miR-432, miR-497-5p, miR-4508, miR-16-1-3p, miR-16b, miR-6240, miR-432-3p, miR-432-3p, miR-2285v, miR-3141, miR-365b-5p, miR-146a, miR-7-5p, miR-196b-5p, miR-26b-5p, miR-3074-5p, miR-329-5p, novel\_68, miR-6535, miR-299b-3p, miR-3591-3p, miR-216a-3p, miR-3970, miR-3141, miR-148a-3p, miR-146b-5p, miR-2319a, miR-412-3p, miR-410-5p, miR-335-5p, novel\_87, miR-28c, miR-6123, miR-379-3p, miR-6119-3p, miR-1224-5p, miR-6517, miR-299a-3p, miR-2285ad, miR-129-1-3p, miR-134-5p, miR-450a-1-3p, miR-322-5p, miR-505-5p, miR-330-5p, miR-23b-5p, miR-1343-5p, miR-3591-5p, miR-196a-5p, miR-885-3p, novel\_39, miR-148b-5p, miR-205-5p, novel\_127, miR-152-3p, miR-6536, miR-874-3p, miR-23b, miR-200a-5p, miR-30e-5p, miR-329b, miR-16-5p, novel\_42, miR-134-5p, novel\_4, miR-2300a-5p, miR-2285e, miR-30b-3p, miR-3120-5p, miR-424-5p, miR-2330-5p, miR-758-3p, miR-4532, miR-193a, miR-3187-3p, miR-326, novel\_103, miR-25-5p, miR-499b-5p, miR-452-3p, miR-10b, novel\_94, miR-877-3p, miR-452-5p, miR-376a-2-5p, miR-671-5p, miR-148a-3p, miR-216a-3p, miR-377-3p, miR-301a-3p, miR-27a-3p, miR-206, miR-3964, miR-4492, miR-454-3p, miR-2285j, miR-485-3p, miR-206-3p, miR-224-5p, miR-1285-5p, miR-301b-3p, miR-2428, miR-342-3p, miR-212-3p, miR-19b-3p, miR-1839-5p, miR-128-3p, miR-2284aa, miR-27b-3p, miR-2113, miR-1a-3p, miR-3071-5p, miR-125b-2-3p, miR-148b-3p, miR-2284z, miR-421, miR-130a-3p, miR-27a-3p, miR-376a-5p, miR-130b-3p, miR-152-3p, miR-342, miR-224-5p, miR-377-3p, novel\_17, miR-505, miR-8485, miR-1



novel\_94, miR-147-3p, miR-199b-5p, miR-361-3p, miR-144-5p, miR-203-3p, miR-2483-3p, miR-378e, miR-378g, miR-452-3p, miR-20a-3p, miR-4792, miR-2284q, miR-301a-5p, miR-1973, miR-2285y, miR-371a-5p, miR-2440, miR-7705, miR-361-3p, miR-2285f, miR-3956-3p, miR-3059-5p, novel\_60, miR-2447, miR-544a, miR-378c, miR-362-3p, miR-125b-2-3p, miR-301b-5p, miR-329-3p, miR-6529a, miR-2284r, miR-484, miR-378b, miR-421, miR-9788-3p, miR-216a-3p, miR-455-3p, miR-147a, miR-1298-3p, miR-153, miR-181b-2-3p, miR-105-1, miR-151a-3p, novel\_78, novel\_4, miR-214-3p, miR-146b, miR-153-3p, miR-199b-5p, miR-25-5p, miR-491-5p, miR-362-3p, miR-2957, miR-1306-5p, miR-2310, miR-378d, miR-33a-5p, let-7c-3p, miR-382-3p, miR-1827, miR-582-5p, miR-543-3p, miR-625-5p, miR-1895, miR-133b-3p, miR-500a-3p, miR-21a-3p, miR-877-5p, miR-155-5p, novel\_32, miR-204-3p, miR-193b-3p, miR-6130, miR-582-5p, miR-532-5p, miR-221-5p, miR-545-3p, miR-378a-3p, miR-500, miR-708-5p, miR-874-5p, miR-664a, miR-155-5p, miR-17-3p, miR-665, miR-664a-5p, miR-151-3p, miR-338-3p, miR-214, miR-425-5p, miR-2330-3p, miR-3074-5p, miR-4510, miR-539-5p, miR-378c, miR-34a-5p, miR-664-5p, miR-133a-3p, miR-184-3p, miR-378a-3p, miR-5703, miR-2408, miR-362-3p, miR-2300b-3p, miR-2366, miR-1246, novel\_133, miR-378i, novel\_83, miR-340-5p, miR-95-3p, miR-380-5p, miR-3600, miR-21-3p, miR-221-5p, miR-34b-5p, miR-760-3p, miR-422a, miR-324-3p, miR-143-3p, miR-146a-5p, miR-2411, miR-2424, miR-486-3p, miR-181b-1-3p, miR-2887, miR-378f, miR-2319a, miR-146b-5p, miR-450b-3p, miR-3065-5p, miR-378b, miR-1306, miR-2387, miR-2285ab, miR-181b-3p, miR-677, miR-6535, miR-34b, miR-3074-5p, novel\_68, miR-22-5p, novel\_1, miR-34c, miR-2284o, miR-502-5p, miR-199b-5p, miR-449a, miR-24-3p, miR-323c, novel\_101, miR-758-5p, miR-17-3p, miR-2285y, miR-3957-3p, miR-193b-3p, miR-188-5p, miR-26a-

miR-10b-1, miR-1343-3p, novel\_4, miR-2300a-5p, miR-118b-3p, miR-9788-3p, miR-216a-3p, miR-1298-3p, miR-125b-2-3p, miR-30b-3p, miR-541, miR-2284r, miR-296-5p, miR-484, miR-3120-5p, miR-21b, miR-450b-5p, miR-106a-5p, miR-424-5p, miR-2330-5p, miR-494-3p, miR-4532, miR-30c-1-3p, miR-16b, miR-106b-5p, miR-505, miR-1306-5p, miR-431-5p, miR-342, miR-103a-2-5p, miR-2319b, miR-10b, miR-20a-3p, miR-1185-2-3p, miR-3082-5p, miR-378g, miR-499a-3p, miR-378j, miR-129b-5p, miR-99b-5p, miR-3956-3p, miR-541-3p, miR-2447, novel\_60, miR-423-5p, miR-107-5p, miR-30b-5p, novel\_82, miR-2284q, miR-2285t, miR-335, miR-4726-5p, miR-30d-3p, miR-3600, miR-106a, miR-18a-3p, miR-2284h-5p, miR-15a-5p, miR-1197-5p, miR-188-3p, miR-2366, miR-193b-5p, miR-30c-5p, novel\_133, miR-133a-3p, miR-33b-3p, miR-493-3p, miR-20a, miR-195a-3p, miR-486-3p, miR-130a-5p, miR-377-5p, miR-125b, miR-185-3p, miR-324-3p, miR-500a-5p, miR-26a-5p, miR-210-5p, miR-299-3p, miR-30d, miR-30b-3p, miR-760-3p, miR-106a, miR-21-3p, miR-496-3p, miR-30c-1-3p, miR-155-5p, miR-15b-5p, miR-877-5p, miR-204-3p, novel\_32, miR-6130, miR-656-3p, miR-499b-3p, miR-2284s, miR-30d-5p, miR-129b-3p, miR-21a-3p, miR-1827, miR-625-5p, miR-885-3p, miR-1895, miR-345-5p, miR-30f, miR-133b-3p, miR-3074-2-3p, miR-129-2-3p, miR-4510, miR-3074-5p, miR-6134, miR-3184-5p, miR-346, miR-665, miR-29b-2-5p, miR-320e, miR-30a-3p, miR-324-3p, miR-19b-1-5p, miR-30e-3p, miR-874-5p, miR-708-5p, miR-424-5p, miR-4492, miR-664a, miR-155-5p, miR-377-5p, miR-20b, miR-149-5p, miR-194-3p, miR-134-3p, miR-185-5p, miR-3071-5p, miR-1285, miR-19b-2-5p, miR-2889, miR-744-5p, miR-455-5p, miR-497-5p, miR-30b-3p, miR-138, miR-16b, miR-2483-5p, miR-345-5p, miR-654-3p, novel\_51, miR-455-5p, miR-106a-5p, miR-99a-5p, miR-17-5p, miR-365b-5p, miR-105-5p, miR-125a-5p, miR-1343-5p, miR-192-3p, miR-2285w, miR-4286, miR-101-5p, miR-369-3p, miR-127-5p, miR-491-5p, miR-320d, novel\_96, miR-26a-5p, miR-377-3p, miR-320b, miR-182-5p, miR-323b-3p, novel\_121, miR-2284h-5p, miR-409b, miR-4429, miR-1434-3p, miR-374c-5p, miR-539-5p, novel\_101, miR-487b-5p, miR-208b-5p, miR-665, miR-377-3p, miR-320c, miR-504-5p, miR-182-5p, miR-26b-5p, miR-504, miR-544-5p, miR-320a

CYP26B1 ENSOARGO(Cytochrome P-450) 324-3p, miR-500a-5p, miR-26a-5p, miR-210-5p, miR-299-3p, miR-30d, miR-30b-3p, miR-760-3p, miR-106a, miR-21-3p, miR-496-3p, miR-30c-1-3p, miR-155-5p, miR-15b-5p, miR-877-5p, miR-204-3p, novel\_32, miR-6130, miR-656-3p, miR-499b-3p, miR-2284s, miR-30d-5p, miR-129b-3p, miR-21a-3p, miR-1827, miR-625-5p, miR-885-3p, miR-1895, miR-345-5p, miR-30f, miR-133b-3p, miR-3074-2-3p, miR-129-2-3p, miR-4510, miR-3074-5p, miR-6134, miR-3184-5p, miR-346, miR-665, miR-29b-2-5p, miR-320e, miR-30a-3p, miR-324-3p, miR-19b-1-5p, miR-30e-3p, miR-874-5p, miR-708-5p, miR-424-5p, miR-4492, miR-664a, miR-155-5p, miR-377-5p, miR-20b, miR-149-5p, miR-194-3p, miR-134-3p, miR-185-5p, miR-3071-5p, miR-1285, miR-19b-2-5p, miR-2889, miR-744-5p, miR-455-5p, miR-497-5p, miR-30b-3p, miR-138, miR-16b, miR-2483-5p, miR-345-5p, miR-654-3p, novel\_51, miR-455-5p, miR-106a-5p, miR-99a-5p, miR-17-5p, miR-365b-5p, miR-105-5p, miR-125a-5p, miR-1343-5p, miR-192-3p, miR-2285w, miR-4286, miR-101-5p, miR-369-3p, miR-127-5p, miR-491-5p, miR-320d, novel\_96, miR-26a-5p, miR-377-3p, miR-320b, miR-182-5p, miR-323b-3p, novel\_121, miR-2284h-5p, miR-409b, miR-4429, miR-1434-3p, miR-374c-5p, miR-539-5p, novel\_101, miR-487b-5p, miR-208b-5p, miR-665, miR-377-3p, miR-320c, miR-504-5p, miR-182-5p, miR-26b-5p, miR-504, miR-544-5p, miR-320a

HACD1 ENSOARGO(C 3-hydroxy 5p, miR-409b, miR-4429, miR-1434-3p, miR-374c-5p, miR-539-5p, novel\_101, miR-487b-5p, miR-208b-5p, miR-665, miR-377-3p, miR-320c, miR-504-5p, miR-182-5p, miR-26b-5p, miR-504, miR-544-5p, miR-320a

miR-1827, novel\_99, miR-18a-5p, miR-339b, miR-30f, miR-30d-5p, miR-129b-3p, miR-155-5p, miR-151b, miR-204-3p, novel\_25, miR-22-3p, miR-193b-3p, miR-192-5p, miR-301a-3p, miR-499b-3p, miR-532-5p, miR-2331-3p, miR-221-5p, miR-4492, miR-487a-5p, miR-454-3p, miR-155-5p, miR-664a-5p, miR-665, miR-29b-2-5p, miR-324-3p, miR-6134, miR-3184-5p, miR-206-3p, miR-346, miR-769-5p, miR-2330-3p, miR-3958-5p, miR-3074-5p, miR-378d, miR-34a-5p, miR-133a-3p, miR-184-3p, miR-4429, miR-142-3p, miR-33b-3p, miR-188-3p, miR-1197-5p, miR-2904, miR-2366, miR-215-5p, miR-2300b-3p, miR-30c-5p, novel\_133, miR-328-3p, miR-151-5p, miR-532-3p, miR-210-3p, miR-212-5p, miR-18a-3p, miR-3960, miR-299-3p, miR-221-5p, miR-30d, miR-34b-5p, miR-760-3p, miR-320d, miR-324-3p, miR-542-5p, miR-210-5p, miR-30b, miR-2432, miR-29b-1-5p, miR-183-5p, miR-493-5p, miR-181a-3p, miR-361-3p, miR-500-3p, miR-454-5p, miR-4443, miR-489, miR-499a-3p, miR-378g, miR-3596, miR-452-3p, miR-7134-3p, miR-4726-5p, miR-301a-5p, miR-769-5p, miR-2440, miR-30b-5p, miR-7705, miR-502-3p, miR-423-5p, miR-361-3p, miR-877-3p, miR-194b-5p, miR-1296-5p, miR-3956-3p, miR-3059-5p, novel\_60, miR-2447, miR-3120-5p, miR-2426, miR-758-3p, miR-125b-2-3p, miR-30b-3p, miR-1a-3p, miR-501-3p, miR-1298-5p, miR-301b-5p, miR-2284r, miR-296-5p, miR-9788-3p, miR-1298-3p, novel\_4, novel\_78, miR-1343-3p, miR-2300a-5p, miR-542-5p, miR-130b-3p, miR-25-5p, miR-491-5p, miR-29b-1-5p, miR-5126, miR-431-5p, miR-326, miR-1306-5p, miR-320b, miR-758-3p, miR-3187-3p, miR-376b, miR-1388-3p, miR-485-5p, miR-876-3p, miR-320a, miR-18a, miR-488-3p, miR-30e-5p, miR-769, miR-34c-5p, miR-1271, miR-542-5p, miR-370-3p, miR-3432a, novel\_9, miR-331-3p, miR-2433, miR-365a-5p, miR-181c-3p, miR-1260b, miR-181a-2-3p, novel\_42, miR-155-5p, miR-30c, miR-501-3p, miR-330-5p, miR-30a-5p, miR-1343-5p, miR-486-5p, miR-7705, miR-491-3p, miR-7859, miR-2330-3p, miR-548o-3p, miR-548e-3p, miR-6516-3p, miR-760-3p, miR-219a-1-3p, miR-200b, miR-421, miR-2285ad, miR-429-3p, miR-3600, miR-505-3p, miR-26b-3p, miR-30b-3p, miR-200b-3p, miR-181a-5p, miR-30b-3p, miR-194-5p, miR-432-3p, miR-329a-5p, miR-181b-5p, miR-200c-3p, miR-221-5p, miR-2285af, miR-200c, miR-365b-5p, miR-194a, miR-6130, novel\_32, miR-221-5p, miR-329-5p, miR-7-1-3p, miR-9851-3p, miR-505-3p, miR-1827, miR-409-5p, miR-3065-5p, miR-877-3p, miR-423-5p, miR-3184-5p, miR-365a-5p, miR-181c-5p, miR-135a-2-3p, miR-335-5p, miR-4510, miR-181d-5p, miR-194b-5p, miR-4726-5p, miR-3968, miR-335, novel\_1, miR-135a-1-3p, miR-331-3p, miR-2285y, miR-371a-5p, miR-328-3p, novel\_32, miR-204-3p, miR-125a, miR-21-3p, miR-184-3p, miR-450b-3p, miR-6395, miR-541, miR-3154, miR-3591-3p, miR-877-3p, miR-4532, miR-541-3p, miR-2447, novel\_124, miR-4492, miR-125a-5p, miR-185-3p, miR-125b, miR-125b-5p, miR-210-5p, miR-296-3p, miR-483-3p, miR-107, miR-135a-2-3p, miR-296-3p, miR-1271-3p, miR-296-5p, miR-150-5p, miR-3591-3p, miR-876-3p, miR-885-3p, miR-107, miR-7975, miR-885-3p, miR-625-5p, miR-548e-3p, miR-103a-3p, miR-1343-3p, miR-2285aa, miR-21-3p, miR-296-3p, miR-552-3p, miR-7859, miR-483-3p, miR-3965, miR-6535, miR-103

miR-106a-5p, miR-3187-3p, miR-8485, miR-758-3p, miR-362-3p, miR-2957, miR-106b-5p, miR-106a-5p, miR-17-5p, miR-320b, miR-1343-5p, miR-199b-5p, miR-193a-3p, miR-20b, miR-2459, miR-758-3p, miR-125b-2-3p, miR-329-3p, miR-1285, miR-143-5p, miR-362-3p, miR-16-1-3p, miR-193b-3p, miR-9-5p, miR-212-3p, miR-199b-5p, miR-211, miR-2285y, miR-2285n, miR-20a-5p, miR-211-5p, miR-20a-3p, miR-320c, miR-144-5p, miR-18b, miR-199b-5p, miR-135b-5p, miR-410-5p, miR-20a, miR-199a-5p, miR-122-3p, miR-217, miR-2285af, miR-8117, miR-2285p, miR-125a-3p, miR-106a, miR-320d, miR-466i-5p, miR-1224-5p, miR-18b-5p, miR-2285ad, miR-106a, miR-9-5p, miR-1343-5p, miR-217-5p, miR-1290, miR-362-3p, miR-16-1-3p, miR-4429, miR-3958-5p, miR-193a-5p, miR-144-5p, miR-665-5p, miR-3074-2-3p, miR-1306-5p, miR-93, miR-320e, miR-135a-5p, miR-410-5p, miR-135a-1-3p, miR-204-5p, miR-3068-3p, miR-199a-5p, miR-193b-3p, miR-93-5p, miR-320a, miR-18a, miR-17-5p, miR-20b-5p, miR-3074-1-3p, miR-329a, miR-18a-5p

TNFRSF21 ENSOARGOC tumor ne 5p, miR-665, miR-210-3p, miR-6516-5p, miR-199a-3p, miR-197-3p, miR-218-1-3p, miR-493-5p, miR-494-3p, miR-2310, miR-503-3p, miR-205-5p, miR-199a-3p, miR-125a-3p, miR-3601, miR-1277-3p, miR-139-5p, miR-3120-3p, miR-6516, miR-582-5p, miR-670-3p, miR-139-5p, miR-488-3p, miR-150-5p, miR-411, miR-493-5p, miR-6516-3p, miR-1814c, miR-1248, miR-582-5p, miR-145-3p, miR-6402, miR-3604, miR-669a-3p

STAM ENSOARGOC signal t

miR-45b-3p, miR-9788-3p, miR-1298-3p, miR-27a-3p, miR-145b, miR-1343-3p, miR-2300a-5p, miR-378c, miR-1388-5p, miR-323b, miR-378b, miR-296-5p, miR-484, miR-8485, miR-378d, miR-1388-3p, miR-214-3p, miR-130b-3p, miR-487b-5p, miR-323b-3p, miR-342, miR-326, miR-27a-3p, miR-4443, miR-378e, miR-2483-3p, miR-493-5p, miR-1983, miR-504, miR-361-3p, miR-219a-2-3p, miR-6527, miR-2447, miR-499a-5p, miR-2285y, novel\_82, miR-2285n, miR-3600, miR-18a-3p, miR-218-1-3p, miR-378d, miR-142-3p, miR-184-3p, miR-5703, miR-1197-5p, miR-378a-3p, miR-378i, miR-664b-3p, miR-181b-1-3p, miR-30b-3p, miR-3653-3p, miR-324-3p, miR-422a, miR-125b, miR-345-3p, miR-204-3p, miR-377-3p, miR-301a-3p, miR-323-5p, miR-6130, miR-216b-3p, miR-378a-3p, miR-504-5p, miR-660-5p, miR-1827, let-7g-3p, miR-345-5p, miR-122-5p, miR-6525, miR-214, miR-378c, miR-129-2-3p, miR-3074-5p, miR-4510, miR-874-5p, miR-454-3p, miR-SH2D3C ENSOARGO(SH2) doma 17-3p, miR-664a, miR-324-3p, miR-29b-2-5p, miR-320e, miR-665, miR-149-5p, miR-412-5p, miR-26b-3p, miR-133b-5p, miR-7862, miR-27b-3p, miR-2284ab, miR-219a-1-3p, miR-145a-5p, miR-3071-5p, miR-1843b-5p, let-7j, miR-345-5p, miR-432-3p, miR-432-3p, miR-493-5p, miR-660, miR-125a-5p, miR-124-5p, miR-197-5p, miR-2411-3p, miR-377-3p, miR-677, miR-181b-3p, miR-323a-5p, miR-670-3p, miR-3074-5p, miR-378f, miR-379-5p, miR-412-3p, miR-216a-3p, miR-18a-3p, miR-326-3p, miR-301b-3p, novel\_101, miR-17-3p, miR-342-3p, miR-22-5p, miR-4324, miR-134-5p, miR-129-1-3p, miR-378h, miR-2285ad, miR-128-3p, miR-330-5p, miR-345-3p, miR-134, novel\_39, miR-490-3p, miR-148b-5p, miR-29b-2-5p, miR-543-5p, novel\_127, miR-17-3p, miR-127-5p, miR-2285aa, miR-2355-5p, miR-125a, miR-574-5p, miR-503-3p, miR-23a-5p, miR-671-5p, miR-876-3p, miR-345-5p, miR-3154, miR-378c, miR-145-3p, miR-6128, miR-134-5p, miR-125b-5p, miR-6710-5p, miR-3060, miR-2433

miR-299a-3p, miR-376a-5p, miR-196a-2-3p, miR-505-5p, miR-129-1-3p, novel\_121, miR-545-5p, miR-196a-5p, miR-23b-5p, miR-501-3p, miR-218-2-3p, miR-300, miR-99a-5p, miR-2284f, miR-3064-5p, miR-30a-3p, miR-192-3p, miR-490-3p, miR-2284a, miR-2285b, miR-3065-3p, novel\_39, miR-2284y, miR-125a-3p, miR-99a, miR-2285af, miR-3071-3p, miR-30c-2-3p, miR-127-5p, miR-543-5p, miR-152-3p, miR-3068-3p, miR-1271, miR-598-3p, miR-370-3p, miR-365a-3p, miR-769, miR-381-3p, miR-23b, miR-376c-5p, miR-320a, miR-100-5p, miR-10a-3p, miR-767, miR-376c-5p, miR-2284v, miR-6128, miR-193a-5p, miR-1197-3p, miR-145-3p, miR-370-5p, miR-2284k, miR-331-3p, miR-767-5p, miR-138-5p, miR-3432a, miR-133b-5p, miR-187-3p, miR-130a-3p, miR-2284d, miR-3535, miR-1285, miR-542-3p, miR-2113, miR-1434-3p, miR-19b-2-5p, novel\_23, miR-16-1-3p, miR-138, miR-2284ab, miR-2284x, miR-369-5p, miR-6240, miR-224-5p, miR-99a-5p, miR-330-3p, miR-196b-5p, miR-193a-3p, miR-3120-3p, miR-655-5p, miR-670-3p, miR-299b-3p, miR-323a-5p, miR-669, miR-320c, miR-148a-3p, miR-376b-5p, miR-2285ab, miR-3591-3p, miR-412-3p, miR-19a-3p, miR-6395, novel\_120, miR-135a-2-3p, miR-1193, miR-193b-3p, miR-24-3p, miR-301b-3p, miR-2428, miR-2284o, miR-379-3p, miR-199c, miR-502b, miR-203b-5p, miR-30d-3p, miR-148b-3p, miR-23c, miR-210-3p, miR-23b-3p, miR-328-3p, miR-616-3p, novel\_83, miR-376a-5p, miR-1246, miR-2300b-3p, miR-5703, miR-1197-5p, miR-2904, miR-4429, miR-19b-3p, miR-378d, miR-2284u, miR-16-1-3p, miR-10a-3p, miR-369-3p, miR-219b-5p, miR-216a-5p, miR-2284m, miR-320d, miR-299-3p, miR-221-5p, miR-1277-3p, miR-30c-1-3p, miR-221-5p, miR-552-3p, miR-3065-3p, miR-21-3p, miR-370-5p, miR-323-5p, miR-139-5p, miR-193b-3p, miR-301a-3p, miR-499b-3p, miR-377-3p, novel\_25, miR-204-3p, miR-655, miR-433-3p, miR-500a-3p, miR-190b-3p, miR-508-3p, miR-186-5p, miR-1827, miR-625-

RXFP2      ENSOARGO(relaxin/

miR-128b, miR-3071-5p, miR-30b-3p, miR-29b, miR-45b-5p, miR-185-5p, miR-544b, miR-455-5p, miR-197-5p, miR-124-5p, miR-1343-5p, miR-130b-5p, miR-539-3p, miR-376b-3p, miR-7975, miR-655-5p, miR-34b, miR-29a-3p, miR-6402, miR-133a-5p, miR-34c, novel\_1, miR-147-5p, miR-3959-3p, miR-211, miR-326-3p, miR-449a, miR-615-3p, miR-345-3p, miR-501-3p, miR-29d-3p, miR-105-2, miR-222, miR-378h, miR-1271-5p, miR-2411-5p, miR-376b-3p, miR-339a, miR-217, miR-30c-2-3p, miR-450a-2-3p, miR-29b-2-5p, miR-2385-3p, miR-199a-5p, miR-1957a, miR-488-3p, miR-10b-3p, miR-671-5p, miR-7144-5p, miR-487a-3p, miR-141-3p, miR-365a-3p, miR-34c-5p, miR-199a-5p, miR-29b-3p, miR-144, miR-767-5p, miR-28-5p, miR-204-5p, miR-323-3p, miR-365a-5p, miR-378c, miR-484, miR-378b, miR-30b-3p, miR-125b-2-3p, miR-450b-5p, miR-544a, miR-2426, miR-378c, miR-16-2-3p, miR-105-1, miR-409b, miR-221-3p, miR-216a-3p, miR-326, miR-1306-5p, miR-362-3p, miR-494-3p, miR-33a-5p, miR-30c-1-3p, miR-758-3p, miR-193a, miR-199b-5p, miR-361-3p, novel\_94, miR-877-3p, miR-20a-3p, miR-664b, miR-499b-5p, miR-378e, miR-376d, miR-2285n, miR-2285y, miR-371a-5p, miR-7134-3p, miR-3059-5p, miR-452-5p, miR-219a-2-3p, miR-502-3p, miR-362-3p, miR-2300b-3p, miR-1246, miR-1197-5p, miR-5703, miR-1193, miR-485-3p, miR-3600, miR-1b-3p, miR-487a-3p, miR-760-3p, miR-34b-5p, miR-30b-3p, miR-1277-5p, miR-105-3p, miR-216c-5p, miR-125b-2-3p, miR-2411, miR-21a-3p, miR-154b-3p, let-7g-3p, miR-582-5p, miR-378a-3p, miR-544-3p, miR-204-3p, miR-222-3p, miR-29b-2-5p, miR-19b-1-5p, miR-6516-3p, miR-708-5p, miR-145a-3p, miR-378c, miR-3074-2-3p, miR-2113, miR-19b-2-5p, miR-16-1-3p, miR-31-5p, miR-339-5p, miR-194-3p, miR-2411-3p, novel\_51, miR-365b-5p, miR-105-5p, miR-493-5p, miR-6240, let-7f-2-3p, let-7f-2-3p, miR-2285r, let-7i miR-1306 miR-410-5p miR-378f miR-216b-3p novel\_68 miR-

miR-300, miR-2284z, novel\_121, miR-222, miR-429-3p, miR-181b-5p, miR-200c-3p, miR-200a-3p, miR-205-5p, miR-6119-5p, miR-200c, miR-3071-3p, miR-200a, miR-2285b, miR-30a-3p, miR-10b-3p, miR-190a-3p, miR-381-3p, miR-137-3p, miR-23b, miR-2284n, miR-3068-3p, miR-141-3p, miR-138-5p, miR-204-5p, miR-6740-5p, miR-28a-3p, miR-138, miR-188-5p, miR-27b-3p, miR-181a-5p, miR-1434-3p, miR-412-5p, miR-2285g, miR-544b, miR-133b-5p, miR-452-5p, miR-466f-3p, miR-2284l, miR-2285ab, miR-3065-5p, miR-3120-3p, miR-26b-5p, novel\_1, miR-203b-5p, miR-147-5p, miR-6123, miR-6402, miR-142b, miR-485-3p, miR-382-5p, novel\_87, miR-33a-3p, miR-211, miR-374c-5p, novel\_27, miR-219b-3p, miR-335-5p, novel\_101, miR-495-3p, miR-2285x, miR-193b-5p, miR-23b-3p, miR-487a-3p, miR-23c, miR-222-5p, miR-340-5p, miR-199a-3p, miR-30d-3p, miR-485-3p, miR-2284m, miR-3653-3p, miR-1277-5p, miR-26a-5p, miR-125b-2-3p, miR-130a-5p, miR-216c-5p, let-7g-3p, miR-2312, miR-1827, novel\_99, miR-21a-3p, miR-2285c, let-7f-1-3p, miR-544-3p, miR-301a-3p, miR-545-3p, miR-182-5p, miR-664a, miR-454-3p, miR-129-5p, miR-222-3p, miR-30e-3p, miR-30a-3p, miR-181c-5p, miR-544a, miR-2284aa, miR-101c, miR-541, miR-221-3p, miR-1185-3p, miR-2285e, miR-548w, novel\_4, miR-1343-3p, miR-27a-3p, miR-199a-3p, miR-323b-3p, miR-182-5p, miR-193a, miR-491-3p, miR-2310, miR-382-3p, miR-23a-3p, miR-299b-5p, miR-9-3p, miR-221, miR-381-3p, miR-2483-3p, miR-1185-2-3p, miR-27a-3p, miR-20a-3p, miR-499b-5p, miR-126b-5p, miR-7977, miR-211-5p, miR-3968, miR-499a-5p, miR-335, miR-2285t, miR-382-3p, miR-9-3p, miR-7705, miR-541-3p, miR-2285f, miR-2284j, miR-181d-5p, miR-219a-5p



miR-378d, miR-652-5p, miR-744-3p, miR-33a-5p, miR-1839-3p, miR-101b-3p, miR-2330-5p, miR-124a, miR-214-3p, miR-25-5p, miR-3955-3p, miR-323b-3p, miR-1306-5p, miR-342, miR-199a-3p, miR-2285e, miR-9788-3p, miR-148b-5p, miR-455-3p, miR-376b-3p, miR-142-5p, miR-27a-3p, miR-5010-3p, miR-2300a-5p, novel\_4, miR-1343-3p, miR-21b, miR-378c, miR-125b-2-3p, miR-323b, miR-378b, miR-296-5p, miR-2284r, miR-1285-5p, miR-877-3p, miR-219a-5p, miR-181d-5p, miR-452-5p, miR-1296-5p, miR-2285f, miR-3956-3p, novel\_60, miR-2447, miR-2285t, miR-4726-5p, miR-27a-3p, miR-376d, miR-203-3p, miR-378g, miR-378e, miR-7977, miR-2319b, miR-20a-3p, miR-139-5p, miR-376a-3p, miR-361-3p, miR-143-3p, miR-486-3p, miR-130a-5p, miR-125b-2-3p, miR-345-3p, miR-195a-3p, miR-2285w, miR-329a-5p, miR-216c-5p, miR-21-3p, miR-1277-5p, miR-466i-5p, miR-422a, miR-185-3p, miR-324-3p, miR-210-5p, novel\_17, miR-199a-3p, miR-2284h-5p, miR-222-5p, miR-210-3p, miR-212-5p, miR-148a-5p, miR-378d, miR-664-5p, miR-16-1-3p, miR-217-5p, miR-1197-5p, miR-378a-3p, miR-1434-5p, miR-188-3p, miR-124-3p, miR-1246, novel\_133, miR-378i, miR-181c-5p, miR-142a-5p, miR-214, miR-2330-3p, miR-145a-3p, miR-129-2-3p, miR-3074-5p, miR-3184-3p, miR-378c, miR-539-5p, miR-130b-5p, miR-129-5p, miR-4492, miR-664a, miR-17-3p, miR-338-5p, miR-29b-2-5p, miR-204-3p, novel\_32, novel\_25, miR-139-5p, miR-323-5p, miR-216b-5p, miR-377-3p, miR-21-3p, miR-378a-3p, miR-2331-3p, miR-543-3p, miR-345-5p, let-7g-3p, miR-2312, miR-2285c, miR-21a-3p, miR-345-5p, miR-296-3p, miR-2284l, miR-2285r, miR-101-5p, miR-668-3p, miR-2483-5p, miR-130b-5p, miR-452-5p, miR-196b-5p, miR-378a-5p, novel\_51, miR-455-5p, miR-377-3p, miR-296-3p, miR-544b, miR-2355-3p, miR-134-3p, miR-185-5p, miR-412-5p, miR-432-5p, miR-31-5p, miR-27b-3p, miR-455-5p, miR-16-1-3p, miR-138, miR-3071-5p, miR-1434-3p, miR-

DEF6

ENSOARGO(DEF6

gua:

miR-654-3p, miR-432-3p, miR-345-5p, miR-380-5p, miR-6240, miR-668-3p, let-7f-2-3p, let-7f-2-3p, miR-124-5p, miR-125a-5p, miR-330-3p, miR-197-5p, let-7d-3p, miR-455-5p, novel\_51, miR-432-5p, miR-134-3p, miR-185-5p, miR-3431, miR-149-5p, miR-340-3p, miR-31-5p, miR-339-5p, miR-665, miR-1260b, miR-455-5p, miR-27b-3p, miR-873a-5p, miR-432, miR-19b-2-5p, miR-1434-3p, miR-1843b-5p, miR-22-3p, miR-3071-5p, miR-323c, miR-326-3p, miR-2284w, miR-342-3p, miR-135a-2-3p, miR-542-5p, miR-758-5p, miR-17-3p, miR-656-5p, miR-199c, miR-4324, miR-142b, miR-2404, miR-670-3p, miR-677, miR-6535, miR-329-5p, miR-655-5p, miR-1291, miR-412-3p, miR-19a-3p, miR-6395, miR-135b-5p, miR-2285ab, miR-376b-5p, miR-2387, miR-150-5p, miR-376b-3p, miR-380-5p, miR-200a, miR-29a-5p, miR-1271-3p, miR-29b-2-5p, miR-450a-2-3p, miR-17-3p, miR-200c-3p, miR-1260a, miR-376b-3p, miR-200c, miR-339a, miR-758-5p, miR-6516-5p, miR-2411-5p, miR-214-5p, novel\_121, miR-6517, miR-429-3p, novel\_79, miR-582-3p, miR-200b-3p, miR-1290, miR-23b-5p, miR-330-5p, miR-374a-3p, miR-1260b, miR-1306-5p, miR-31-3p, miR-374b-3p, miR-592, miR-410-5p, miR-2332, miR-331-3p, miR-6740-5p, miR-125b-5p, miR-135a-5p, miR-300-3p, miR-769, miR-133c, miR-2285aa, miR-615-5p, miR-125a, miR-10b-3p, miR-345-5p, miR-488-3p, miR-2448-3p, miR-3154, miR-193a, miR-3187-3p, miR-758-3p, miR-1388-3p, miR-382-3p, miR-101b-3p, miR-3955-3p, miR-542-5p, miR-103a-2-5p, miR-214-3p, miR-342, miR-326, miR-29b-1-5p, miR-1298-3p, miR-142-3p, miR-376b-3p, miR-147a, miR-9788-3p, miR-455-3p, miR-2459, miR-1185-3p, miR-330-3p, miR-199b-3p, novel\_78, novel\_4, miR-1343-3p, miR-181b-2-3p, miR-27a-3p, miR-544a, miR-21b, miR-484, miR-125b-2-3p, miR-758-3p, miR-361-3p, novel\_111, miR-8095, miR-2447, miR-212-3p, miR-6527, miR-2285f, miR-1726-5p, miR-374a-3p, novel\_82, miR-218-

novel\_9, miR-134-5p, miR-204-5p, miR-2284k, miR-331-3p, miR-100-3p, miR-323-3p, miR-2284v, miR-6128, miR-2318, miR-7144-5p, miR-137-3p, miR-23b, miR-25-3p, miR-2284n, miR-2355-5p, miR-17-3p, miR-181b-5p, miR-92a-3p, novel\_127, miR-205-5p, miR-92b-3p, miR-28b, miR-450b-5p, novel\_39, miR-2284y, miR-2284a, miR-3064-5p, miR-582-3p, let-7a-2-3p, miR-345-3p, miR-134, miR-2411-5p, miR-483-3p, miR-1271-5p, miR-134-5p, miR-129-1-3p, miR-92a-3p, novel\_1, miR-28c, miR-211, miR-2428, miR-335-5p, miR-17-3p, miR-412-3p, miR-9851-3p, miR-2285ab, miR-21c, miR-18a-3p, miR-411b-3p, miR-3074-5p, miR-3120-3p, miR-483-3p, miR-452-5p, miR-32, miR-2411-3p, miR-432-3p, let-7a-2-3p, miR-2483-5p, miR-2284ab, miR-21-5p, miR-181a-5p, miR-2285g, miR-2284d, miR-411-5p, miR-26b-3p, miR-17-3p, miR-6516-3p, miR-3604, miR-338-5p, miR-142a-5p, miR-181c-5p, miR-338-3p, miR-3074-5p, miR-145a-3p, miR-129-2-3p, miR-1271, miR-2330-3p, miR-425-5p, novel\_99, miR-2285c, miR-216b-5p, miR-32-5p, miR-548o-3p, miR-2284m, miR-324-3p, miR-345-3p, miR-2411, miR-105-3p, miR-2285w, miR-195a-3p, miR-2284u, miR-1434-5p, miR-5703, miR-23b-3p, miR-7859, miR-222-5p, miR-23c, miR-2284h-5p, miR-18a-3p, miR-548e-3p, miR-212-5p, miR-3958-3p, miR-335, miR-490-5p, miR-2285t, miR-301a-5p, novel\_111, miR-363-3p, miR-2285f, let-7i-3p, miR-2284j, miR-181d-5p, miR-96-5p, miR-1983, miR-129b-5p, miR-7857-3p, miR-2483-3p, miR-203-3p, miR-2284g, miR-3064-5p, miR-452-3p, miR-211-5p, miR-7977, miR-3085-3p, novel\_103, miR-8485, miR-4532, miR-758-3p, miR-23a-3p, miR-2284b, miR-450b-5p, miR-299a-5p, miR-101c, miR-301b-5p, miR-758-3p, miR-142-5p, miR-455-3p, miR-2459, miR-2285e

novel\_51, miR-146a, miR-1343-5p, miR-125a-5p, miR-2285l, miR-483-3p, miR-345-5p, miR-22-3p, miR-1285, miR-542-3p, miR-432, miR-27b-3p, miR-138, miR-30b-3p, novel\_116, miR-194-3p, miR-185-5p, miR-134-3p, miR-432-5p, miR-28c, miR-4324, miR-502-5p, miR-542-5p, novel\_101, miR-17-3p, miR-136-3p, miR-219b-3p, miR-2428, miR-326-3p, miR-24-3p, miR-211, miR-18a-3p, miR-2387, miR-2285ab, miR-6516-3p, miR-146b-5p, miR-3074-5p, miR-320c, miR-144-3p, miR-6535, novel\_69, miR-146b-3p, miR-30c-2-3p, miR-205-5p, novel\_127, novel\_96, miR-200a-3p, miR-17-3p, miR-4286, miR-490-3p, novel\_39, miR-28b, miR-330-5p, miR-1343-5p, miR-582-3p, miR-1224-5p, miR-222, miR-214-5p, miR-129-1-3p, miR-483-3p, miR-505-5p, miR-144, miR-125b-5p, miR-331-3p, miR-6740-5p, miR-204-5p, miR-28-5p, miR-138-5p, miR-133a-3p, miR-6128, miR-1197-3p, miR-500b-5p, miR-2903, miR-362-5p, miR-3154, miR-320a, miR-301, miR-488-3p, miR-671-5p, miR-485-5p, miR-7144-5p, miR-329a, miR-345-5p, miR-10b-3p, miR-1271, miR-141-3p, miR-615-5p, miR-125a, miR-542-5p, miR-3957-5p, miR-3957, miR-505, miR-362-3p, miR-29b-1-5p, miR-326, miR-320b, miR-542-5p, miR-214-3p, miR-146b, miR-25-5p, miR-491-5p, miR-2330-5p, miR-758-3p, miR-3187-3p, miR-30c-1-3p, miR-758-3p, miR-30b-3p, miR-301b-5p, miR-2284r, miR-6529a, miR-484, miR-329-3p, miR-296-5p, miR-3120-5p, miR-1839-5p, miR-450b-5p, miR-1388-5p, miR-362-3p, miR-27a-3p, miR-1343-3p, miR-455-3p, miR-500-5p, miR-216a-3p, miR-221-3p, miR-1298-3p, miR-301a-5p, miR-2285n, miR-2285t, miR-4726-5p, miR-2285f, miR-362-5p, miR-361-3p, miR-877-3p, miR-378j, miR-221, miR-361-3p, novel\_94, miR-211-5p, miR-7977, miR-2285u, miR-2319b, miR-452-3p, miR-27a-3p, miR-4443, miR-378g, miR-125b, miR-324-3p, miR-210-5p, miR-542-5p, miR-2285p, miR-21-3p, miR-30b-3p, miR-202-5p, miR-320d, miR-345-3p, miR-143-3p, miR-146a-5p, miR-29b-1-5p, miR-188-3p, miR-2285w, miR-219a-5p, miR-341-3p, miR-3431, miR-455-3p, miR-423-5p, miR-3184-5p, miR-2284h-5p, miR-125b-2-3p, miR-185-3p, miR-2284q

TOR2A ENSOARGO(torsin f. 423-5p, miR-3184-5p, miR-2284h-5p, miR-125b-2-3p, miR-185-3p, miR-2284q

DAZAP1 ENSOARGO(DAZ asso. novel\_133, miR-760-3p, miR-1185-5p, miR-153-3p, miR-335-3p, miR-1343-3p, miR-20a-3p, miR-153

TTC16 ENSOARGO(tetratri. 3p, miR-1343-3p, miR-20a-3p, miR-153

novel\_32, miR-204-3p, miR-155-5p, miR-877-5p, miR-155-5p, miR-10a, miR-6516, miR-323-5p, miR-6130, miR-552-3p, miR-221-5p, miR-2331-3p, miR-30c-1-3p, miR-548o-3p, novel\_99, miR-1827, miR-338-3p, miR-10b-5p, miR-6525, miR-129-2-3p, miR-4510, miR-3184-3p, miR-874-5p, miR-424-5p, miR-4492, miR-130b-5p, miR-155-5p, miR-664a, miR-324-3p, miR-320e, miR-2285j, miR-532-3p, miR-7859, miR-487a-3p, miR-15a-5p, miR-380-5p, miR-485-3p, miR-548e-3p, miR-3960, miR-218-1-3p, miR-2284u, miR-493-3p, miR-941, miR-2904, novel\_133, miR-2300b-3p, miR-486-3p, miR-143-3p, miR-221-5p, miR-324-3p, miR-219b-5p, miR-125b, novel\_17, miR-2285u, miR-211-5p, miR-3064-5p, miR-2319b, miR-1983, miR-361-3p, miR-361-3p, miR-219a-5p, miR-2447, miR-7134-3p, miR-2284q, miR-499a-5p, miR-2285n, novel\_82, miR-2440, miR-2459, miR-1298-3p, miR-145b, novel\_4, miR-330-3p, miR-409b, miR-548w, miR-2284aa, miR-3120-5p, miR-296-5p, miR-10b, miR-30c-1-3p, miR-2284b, miR-652-5p, miR-424-5p, miR-3085-3p, miR-16b, novel\_103, miR-326, miR-324-5p, miR-125a, miR-874-3p, miR-23a-5p, miR-7144-5p, miR-485-5p, miR-876-3p, miR-301, miR-1260b, miR-16-5p, miR-1306-5p, novel\_42, miR-181a-2-3p, miR-486b-3p, miR-204-5p, miR-125b-5p, miR-135a-5p, miR-2284z, miR-129-1-3p, miR-214-5p, miR-322-5p, miR-6516-5p, miR-1224-5p, miR-2285ad, miR-155-5p, miR-10a-5p, miR-23b-5p, miR-330-5p, miR-2284y, miR-192-3p, miR-2285b, miR-3064-5p, miR-543-5p, miR-30f, miR-30c-2-3p, miR-2285af, miR-1260a, miR-323a-5p, novel\_69, miR-10a-5p, miR-3120-3p, miR-135b-5p, miR-195a-5p, miR-1291, miR-412-3p, miR-326-3p, miR-211, miR-371b-3p, miR-24-3p, miR-495-3p, miR-758-5p, miR-203b-5p, miR-6123, miR-128-1-5p, miR-16a, novel\_87, miR-15a, miR-1247-3p, miR-133a-5p, miR-576-3p, miR-6238, miR-2355-3p, miR-185-5p, miR-26a-2-3p, miR-497-5p, miR-188-5p, miR-16b, miR-1260b, miR-145a-5p, miR-873a, novel\_111, miR-338-3p, miR-2428, miR-3065-3p, miR-1306-5p, miR-214, miR-214-3p, miR-210-5p, novel\_51, miR-149-5p, novel\_68, miR-3960, miR-1271, miR-3065-3p, miR-2889, miR-1895, miR-7857

RFC2 ENSOARGO( replicat

LRR43 ENSOARGO( leucine

miR-3074-5p, miR-6134, miR-224-5p, miR-142a-5p, miR-10b-5p, miR-665, miR-4492, miR-208b-5p, miR-129-5p, miR-17-3p, miR-552-3p, miR-21-3p, miR-370-5p, miR-2331-3p, miR-140-5p, miR-221-5p, miR-204-3p, miR-139-5p, miR-2284s, miR-10a, miR-582-5p, miR-129b-3p, miR-299, miR-582-5p, novel\_99, miR-885-3p, miR-339b, miR-2312, miR-5100, miR-20a, miR-2285w, miR-143-3p, miR-146a-5p, miR-486-3p, miR-377-5p, miR-181b-1-3p, miR-125b-2-3p, miR-664b-3p, miR-125b, miR-324-3p, miR-2484, miR-221-5p, miR-30b-3p, miR-760-3p, miR-106a, miR-3600, miR-106a, miR-2284h-5p, miR-217-5p, miR-188-3p, miR-5703, miR-191, miR-181d-5p, miR-2285f, miR-2447, miR-1285-5p, miR-877-3p, miR-107-5p, miR-1973, miR-2440, novel\_82, miR-3964, miR-211-5p, miR-7977, miR-7689-3p, miR-20a-3p, miR-139-5p, miR-3064-5p, miR-4443, miR-376d, miR-1185-2-3p, miR-378g, miR-129b-5p, miR-140-5p, miR-361-3p, miR-877-3p, miR-544-3p, novel\_94, miR-376a-3p, miR-744-3p, miR-106a-5p, miR-1388-3p, miR-8485, miR-106b-5p, miR-431-5p, miR-1306-5p, miR-103a-2-5p, miR-146b, miR-487b-5p, miR-3085-3p, miR-145b, miR-181b-2-3p, novel\_78, miR-105-1, miR-330-3p, miR-1185-3p, miR-216a-3p, miR-9788-3p, miR-376b-3p, miR-1298-3p, miR-142-5p, miR-30b-3p, miR-412-3p, miR-10b, miR-4791, miR-2284r, miR-296-5p, miR-544a, miR-450b-5p, miR-193a-5p, miR-1306-5p, novel\_42, miR-93, miR-125b-5p, miR-370-5p, miR-2332, miR-204-5p, miR-486b-3p, miR-191-5p, miR-125a, miR-1271, miR-370-3p, miR-2355-5p, miR-874-3p, miR-17-5p, miR-3154, miR-93-5p, miR-200a-5p, miR-488-3p, miR-1248, miR-485-5p, miR-7144-5p, miR-20b-5p, novel\_48, miR-4286, miR-3064-5p, miR-490-3p, miR-192-3p, miR-148b-5p, miR-217, miR-339a, miR-376b-3p, miR-543-5p, miR-181b-5p, miR-17-3p, miR-450a-2-3p, miR-431, novel\_79, miR-412, miR-483-3p, miR-3578, miR-10a-5p, miR-105-2, miR-885-3p, miR-1103, novel\_101, miR-17-3p, miR-24-

novel\_39, miR-1271-3p, miR-490-3p, miR-28b, miR-3064-5p, miR-4286, novel\_127, miR-543-5p, miR-450a-2-3p, miR-2898, miR-127-5p, miR-339a, miR-205-5p, miR-125a-3p, miR-214-5p, miR-505-5p, novel\_79, miR-1224-5p, miR-412, miR-299a-3p, miR-1343-5p, miR-330-5p, miR-145-3p, miR-3432a, miR-28-5p, miR-138-5p, novel\_9, miR-125b-5p, miR-2284k, miR-324-5p, miR-154b-5p, miR-34c-5p, miR-2355-5p, miR-1271, miR-125a, miR-615-5p, miR-874-3p, miR-7144-5p, miR-485-5p, miR-329a, miR-329b, miR-320a, miR-3154, miR-488-3p, miR-654-3p, miR-432-3p, miR-106b-3p, miR-125a-5p, miR-1343-5p, miR-124-5p, miR-2285v, miR-194a, novel\_51, miR-377-3p, miR-149-5p, miR-411-5p, miR-412-5p, miR-185-5p, miR-134-3p, miR-130a-3p, miR-339-5p, miR-377-5p, miR-2889, miR-138, miR-30b-3p, miR-197-3p, miR-194-5p, miR-145a-5p, miR-873a-5p, miR-223-3p, miR-1285, miR-1434-3p, miR-326-3p, miR-449a, novel\_120, miR-342-3p, miR-656-5p, miR-199c, miR-6119-3p, miR-206, miR-34c, miR-576-3p, miR-28c, miR-320c, novel\_69, miR-670-3p, miR-299b-3p, miR-34b, novel\_68, miR-3074-5p, miR-9851-3p, miR-6395, miR-450b-3p, miR-1291, miR-412-3p, miR-1306, miR-150-5p, miR-18a-3p, miR-2387, miR-2432, miR-377-5p, miR-183-5p, miR-30b-3p, miR-34b-5p, miR-299-3p, miR-2284m, miR-324-3p, miR-185-3p, miR-125b, novel\_83, miR-199a-3p, miR-151-5p, miR-328-3p, miR-383-5p, miR-18a-3p, miR-378d, miR-34a-5p, miR-4429, miR-188-3p, miR-1197-5p, novel\_133, miR-376a-5p, miR-362-3p, miR-2366, miR-6134, miR-6525, miR-206-3p, miR-665-5p, miR-214, miR-3074-5p, miR-4510, miR-708-5p, miR-454-3p, miR-664a, miR-324-3p, miR-3604, miR-204-3p, miR-151b, miR-499b-3p, miR-377-3p, miR-6130, miR-216b-3p, let-7g-3p, miR-339b, miR-27b-5p, miR-299, miR-4532, miR-8485, miR-193a, miR-744-3p, miR-214-3p, miR-3085-3p, miR-130b-3p, miR-2957, miR-362-3p, miR-199a-3p, miR-320b, miR-342, miR-1306-5p, miR-2310, miR-6240, miR-103a-2-5p, miR-106b-3p, miR-200c-3p, miR-330-3p, miR-200c, miR-129-1-3p, miR-544b, miR-200b, miR-383-5p, miR-7859, miR-212-5p, miR-429-3p, miR-200b-3p, miR-142-3p, miR-544a, miR-140-3p, miR-1290, miR-1246, miR-3959-3p, miR-211, miR-129-2-3p, miR-204-5p, miR-2285t, miR-208b-5p, miR-107-5p, miR-7857-3p, miR-300-3p, miR-544-3p, miR-211-5p, miR-598-3p, miR-499b-5p, miR-374b-5p, miR-1814c, miR-6516-3p, miR-3074-1-3p, miR-598-3p, miR-335, miR-206, miR-129-2-3p, miR-335-5p, miR-1271, miR-206-3p, miR-142a-5p, miR-154a, miR-378b, miR-96-5p, miR-146b-5p, miR-329-5p, miR-6516, miR-146a, miR-2285p, miR-455-5p, miR-330-3p, miR-378a-5p, miR-146b, miR-6240, miR-329a-5p, miR-1, miR-146a-5p, miR-2300b-3p, miR-1a-3p, miR-101a-5p, miR-2426, miR-148a-5p, miR-455-5p, miR-330-3p, miR-485-3p, miR-142-5p, miR-6516-5p, miR-1271-5p, miR-487a-3p, miR-302a-5p, miR-129-1-3p, miR-148b-5p, miR-216a-3p

miR-3141, miR-135b-5p, miR-639b, miR-9851-3p, miR-1291, miR-450b-3p, miR-655-5p, miR-329-5p, miR-3074-5p, novel\_68, miR-320c, miR-669, miR-6535, novel\_69, miR-299b-3p, miR-29a-3p, miR-670-3p, miR-34b, miR-34c, miR-485-3p, miR-576-3p, miR-28c, miR-22-5p, miR-656-5p, miR-29a, miR-29c-3p, miR-193b-3p, miR-342-3p, miR-199b-5p, miR-2428, miR-326-3p, miR-449a, miR-24-3p, novel\_23, miR-542-3p, miR-432, miR-455-5p, miR-30b-3p, miR-29b, miR-377-5p, miR-339-5p, miR-194-3p, miR-149-5p, miR-134-3p, miR-185-5p, miR-3431, miR-432-5p, miR-455-5p, miR-365b-5p, miR-3141, miR-296-3p, miR-193a-3p, miR-125a-5p, miR-1343-5p, miR-378a-5p, miR-628-5p, miR-493-5p, miR-296-3p, miR-432-3p, miR-3154, miR-320a, miR-485-5p, miR-1814c, miR-329a, miR-767, miR-125a, miR-1271, miR-615-5p, miR-3956, miR-2285aa, miR-874-3p, miR-154b-5p, miR-199a-5p, miR-34c-5p, miR-135a-5p, miR-125b-5p, miR-6740-5p, miR-29b-3p, miR-28-5p, miR-134-5p, miR-486b-3p, miR-767-5p, miR-103b, miR-193a-5p, novel\_42, miR-365a-5p, miR-10b-3p, miR-1197-3p, miR-501-3p, miR-330-5p, miR-29d-3p, miR-1343-5p, miR-134, miR-3591-5p, novel\_79, miR-299a-3p, miR-2285ad, miR-129-1-3p, miR-134-5p, miR-505-5p, miR-339a, miR-219-3p, miR-205-5p, miR-4286, miR-181a-2-3p, miR-3064-5p, miR-29b-2-5p, miR-490-3p, miR-3956-5p, miR-199a-5p, miR-28b, miR-199b-5p, miR-361-3p, novel\_94, miR-877-3p, miR-493-5p, miR-7977, miR-541-5p, miR-3064-5p, miR-139-5p, miR-500-3p, miR-378g, miR-7857-3p, miR-107-5p, miR-2285y, novel\_82, miR-4726-5p, miR-3968, miR-6527, miR-1296-5p, miR-3956-3p, miR-541-3p, miR-2447, novel\_60, miR-219a-2-3p, miR-8095, miR-423-5p, miR-502-3p, miR-361-3p, miR-30b-3p, miR-501-3p, miR-541, miR-143-5p, miR-329-3p, miR-296-5p, miR-484, miR-362-3p, miR-1388-5p, miR-5010-3p, novel\_78, miR-1343-3p, novel\_4, miR-409b, miR-491, miR-216a-3p, miR-455-3p, miR-147a, miR-29b-1-5p, miR-362-novel\_32, miR-6535, miR-7859, miR-2285aa, miR-668-3p, miR-216b-3p, miR-543-5p, miR-1197-5p, miR-3141, miR-135a-1-3p, miR-3141

GDPD5 ENSOARGO(glycerop.29b-3p, miR-28-5p, miR-134-5p, miR-486b-3p, miR-767-5p, miR-103b, miR-193a-5p, novel\_42, miR-365a-5p, miR-10b-3p, miR-1197-3p, miR-501-3p, miR-330-5p, miR-29d-3p, miR-1343-5p, miR-134, miR-3591-5p, novel\_79, miR-299a-3p, miR-2285ad, miR-129-1-3p, miR-134-5p, miR-505-5p, miR-339a, miR-219-3p, miR-205-5p, miR-4286, miR-181a-2-3p, miR-3064-5p, miR-29b-2-5p, miR-490-3p, miR-3956-5p, miR-199a-5p, miR-28b, miR-199b-5p, miR-361-3p, novel\_94, miR-877-3p, miR-493-5p, miR-7977, miR-541-5p, miR-3064-5p, miR-139-5p, miR-500-3p, miR-378g, miR-7857-3p, miR-107-5p, miR-2285y, novel\_82, miR-4726-5p, miR-3968, miR-6527, miR-1296-5p, miR-3956-3p, miR-541-3p, miR-2447, novel\_60, miR-219a-2-3p, miR-8095, miR-423-5p, miR-502-3p, miR-361-3p, miR-30b-3p, miR-501-3p, miR-541, miR-143-5p, miR-329-3p, miR-296-5p, miR-484, miR-362-3p, miR-1388-5p, miR-5010-3p, novel\_78, miR-1343-3p, novel\_4, miR-409b, miR-491, miR-216a-3p, miR-455-3p, miR-147a, miR-29b-1-5p, miR-362-novel\_32, miR-6535, miR-7859, miR-2285aa, miR-668-3p, miR-216b-3p, miR-543-5p, miR-1197-5p, miR-3141, miR-135a-1-3p, miR-3141

NAALADL1 ENSOARGO(N-acetyl.216b-3p, miR-543-5p, miR-1197-5p, miR-3141, miR-135a-1-3p, miR-3141



novel\_96, miR-200a-3p, novel\_127, miR-2898, miR-17-3p, miR-376b-3p, miR-3065-3p, novel\_39, miR-490-3p, miR-450c-5p, miR-1271-3p, miR-148b-5p, miR-29b-2-5p, miR-3064-5p, let-7a-2-3p, miR-1343-5p, miR-214-5p, miR-322-5p, miR-758-5p, miR-2285ad, miR-222, miR-6517, miR-486b-3p, miR-28-5p, miR-204-5p, miR-138-5p, miR-409-3p, miR-2332, miR-1197-3p, miR-16-5p, miR-103b, miR-144-5p, miR-133a-3p, miR-1306-5p, miR-3074-1-3p, miR-7144-5p, miR-671-5p, miR-485-5p, miR-1814c, miR-329a, miR-345-5p, let-7g-3p, miR-488-3p, miR-769, miR-365a-3p, miR-370-3p, miR-2355-5p, miR-141-3p, miR-3068-3p, miR-1343-5p, miR-378a-5p, miR-146a, let-7j, miR-345-5p, let-7a-2-3p, miR-2285r, miR-432-3p, miR-668-3p, miR-628-5p, miR-497-5p, miR-26a-2-3p, miR-188-5p, miR-30b-3p, miR-138, miR-16b, miR-16-1-3p, miR-145a-5p, novel\_23, miR-873a-5p, miR-542-3p, miR-1285, novel\_116, miR-149-5p, miR-3431, miR-185-5p, miR-665, miR-26b-3p, miR-340-3p, miR-31-5p, miR-133b-5p, miR-16a, miR-33a-3p, miR-4324, miR-15a, miR-142b, miR-576-3p, miR-2284w, miR-211, miR-24-3p, miR-17-3p, miR-135a-2-3p, miR-146b-5p, miR-195a-5p, miR-6395, miR-1291, miR-410-5p, miR-376b-3p, miR-3065-5p, miR-18a-3p, miR-3591-3p, miR-2387, miR-6535, miR-669, miR-146b-3p, miR-411b-3p, miR-320b, novel\_68, miR-30b-3p, miR-221-5p, miR-760-3p, miR-466i-5p, miR-92a-1-5p, miR-210-5p, novel\_17, miR-2424, miR-146a-5p, miR-486-3p, miR-143-3p, miR-29b-1-5p, miR-16-1-3p, miR-33b-3p, miR-184-3p, miR-124-3p, miR-2904, miR-140-3p, miR-362-3p, miR-193b-5p, miR-328-3p, miR-15a-5p, miR-3600, miR-18a-3p, miR-424-5p, miR-874-5p, miR-708-5p, novel\_74, miR-664a, miR-17-3p, miR-324-3p, miR-29b-2-5p, miR-664a-5p, miR-222-3p, miR-3184-5p, miR-6134, miR-769-5p, miR-3958-5p, miR-3184-3p, miR-145a-3p, miR-186-5p, novel\_99, miR-133b-3p, miR-345-5p, novel\_25, novel\_32, miR-15b-5p, miR-21-3p, miR-3065-

miR-452-5p, miR-1296-5p, miR-6527, miR-423-5p, miR-361-3p, miR-2285y, miR-2440, novel\_82, miR-30b-5p, miR-382-3p, miR-4726-5p, miR-211-5p, miR-7977, miR-499b-5p, miR-2285u, miR-20a-3p, miR-3064-5p, miR-376d, let-7d-5p, miR-378g, miR-361-3p, miR-1983, miR-877-3p, miR-376a-3p, miR-504, miR-424-5p, miR-2330-5p, miR-106a-5p, miR-124a, let-7a-5p, miR-8485, miR-30c-1-3p, miR-16b, miR-106b-5p, miR-362-3p, miR-326, miR-214-3p, let-7e, miR-153-3p, miR-25-5p, miR-1185-5p, miR-3085-3p, miR-145b, novel\_78, miR-105-1, miR-1343-3p, miR-2285e, miR-421, miR-9788-3p, miR-216a-3p, miR-147a, miR-376b-3p, miR-30b-3p, miR-125b-2-3p, miR-412-3p, miR-296-5p, miR-2284r, miR-329-3p, miR-3120-5p, miR-1839-5p, miR-362-3p, miR-214, miR-665-5p, miR-129-2-3p, let-7b, miR-6134, let-7b-5p, miR-3184-5p, miR-665, let-7f, miR-4492, miR-424-5p, miR-450b-3p, miR-3065-3p, miR-504-5p, miR-30c-1-3p, miR-2331-3p, miR-877-5p, miR-15b-5p, miR-151b, let-7i-5p, miR-216b-5p, miR-132-5p, miR-582-5p, miR-2284s, miR-30d-5p, miR-411, miR-129b-3p, miR-2285c, miR-21a-3p, miR-1827, miR-625-5p, miR-30f, miR-339b, miR-20a, miR-329a-5p, miR-486-3p, miR-2411, miR-185-3p, miR-125b, miR-324-3p, miR-30b, miR-21-3p, let-7k, miR-30d, miR-760-3p, miR-466i-5p, miR-98-5p, miR-3600, miR-151-5p, miR-15a-5p, miR-1197-5p, miR-188-3p, miR-1434-5p, miR-5703, miR-124-3p, miR-2408, miR-362-3p, miR-1961, miR-2300b-3p, miR-193b-5p, miR-30c-5p, novel\_133, miR-16-1-3p, miR-3957-3p, miR-326-3p, novel\_27, miR-371b-3p, miR-211, let-7i, miR-16a, miR-20a-5p, miR-15a, miR-1247-3p, miR-502b, miR-6123, miR-378b, miR-329-5p, miR-669, novel\_69, miR-2404, miR-376b-3p, miR-216a-3p, miR-150-5p, miR-2387, miR-3141, let-7e-5p, miR-195a-5p, miR-9851-3p, miR-412-3p, miR-1291, miR-432-3p, miR-432-3p, miR-17-5p, novel\_51, miR-106a-5p, miR-105-5p, miR-

novel\_4, miR-2300a-5p, miR-216a-3p, miR-9788-3p, miR-500-5p, miR-484, miR-296-5p, miR-378b, miR-30b-3p, miR-125b-2-3p, miR-378c, miR-450b-5p, miR-2426, let-7a-5p, miR-424-5p, miR-1839-3p, miR-2330-5p, miR-33a-5p, miR-30c-1-3p, miR-758-3p, miR-342, novel\_115, miR-326, miR-5126, miR-1306-5p, miR-3085-3p, let-7e, miR-3064-5p, miR-10b, miR-452-3p, miR-20a-3p, miR-7977, miR-378e, miR-3082-5p, let-7d-5p, miR-454-5p, miR-361-3p, miR-877-3p, novel\_60, miR-3059-5p, miR-181d-5p, miR-362-5p, miR-502-3p, miR-2285n, miR-769-5p, miR-1973, miR-4726-5p, miR-335, miR-2285t, miR-222-5p, miR-200b, miR-15a-5p, miR-151-5p, miR-616-3p, novel\_133, miR-215-5p, miR-2300b-3p, miR-124-3p, miR-1193, miR-2411, miR-196a-3p, miR-125b, miR-185-3p, miR-760-3p, miR-34b-5p, miR-30b-3p, miR-221-5p, miR-21-3p, miR-299-3p, miR-140-5p, miR-221-5p, miR-378a-3p, miR-182-5p, miR-192-5p, miR-323-5p, miR-204-3p, miR-21a-3p, miR-378c, miR-145a-3p, miR-3074-2-3p, miR-2330-3p, let-7b-5p, miR-6134, miR-29b-2-5p, miR-655-3p, miR-450b-3p, miR-424-5p, miR-133b-5p, let-7g-5p, miR-103, miR-181a-5p, miR-30b-3p, miR-138, miR-1260b, miR-455-5p, miR-130b-5p, miR-654-3p, miR-296-3p, miR-197-5p, miR-455-5p, miR-124-5p, miR-452-5p, miR-125a-5p, miR-146b-3p, miR-323a-5p, miR-2404, miR-34b, miR-2387, miR-18a-3p, miR-1291, miR-450b-3p, miR-107, miR-195a-5p, miR-135b-5p, miR-379-5p, miR-342-3p, miR-24-3p, miR-326-3p, miR-449a, miR-2428, miR-502-5p, miR-15a, miR-34c, miR-16a, let-7i, miR-656-5p, miR-147-5p, miR-502b, miR-7641, miR-378h, miR-2411-5p, miR-214-5p, miR-134, miR-501-3p, let-7d, miR-582-3p, miR-200b-3p, miR-128-3p, miR-29b-2-5p, miR-30a-3p, miR-181a-2-3p, miR-4286, miR-28b, miR-1271-3p, miR-490-3p, miR-1260a, miR-200c, miR-30c-2-3p, let-7c-5p, miR-450a-2-3p, miR-2898, miR-200c-3p, miR-191-3p, miR-181b-5p, miR-107, miR-543-5p, miR-598-3p, miR-141-

MESP2      ENSOARG0(mesoderm

miR-22-3p, miR-197-3p, miR-2113, miR-432, miR-2284x, miR-339-5p, miR-31-5p, miR-194-3p, miR-149-5p, miR-412-5p, miR-194a, novel\_51, miR-32, miR-105-5p, miR-193a-3p, miR-378a-5p, miR-493-5p, let-7a-2-3p, miR-503-3p, miR-1306, miR-150-5p, miR-148a-3p, miR-378f, miR-3074-5p, miR-181b-3p, miR-677, miR-320c, miR-669, miR-4324, miR-29a, miR-29c-3p, miR-193b-3p, miR-376a-3p, miR-23b-5p, miR-1343-5p, miR-3591-5p, novel\_79, miR-412, miR-129-1-3p, miR-486-5p, miR-125a-3p, miR-205-5p, novel\_127, novel\_96, miR-152-3p, miR-127-5p, miR-3064-5p, miR-3956-5p, miR-2285b, novel\_39, miR-2284y, miR-148b-5p, miR-92b-3p, miR-329a, miR-767, miR-876-3p, miR-1271, miR-542-5p, miR-574-5p, miR-133c, miR-25-3p, miR-300-3p, miR-494-5p, miR-2284k, novel\_42, miR-501-3p, miR-329-3p, miR-2284r, miR-1839-5p, miR-101c, miR-362-3p, miR-181b-2-3p, miR-1343-3p, miR-199b-3p, novel\_78, miR-455-3p, miR-148b-5p, miR-147a, miR-106b-5p, miR-182-5p, miR-29b-1-5p, miR-103a-2-5p, miR-491-5p, miR-2284b, miR-127-3p, miR-1388-3p, miR-8485, miR-378d, miR-409-5p, miR-544-5p, miR-493-5p, miR-504, miR-299b-5p, miR-211-5p, miR-7689-3p, miR-2284g, miR-500-3p, miR-25, miR-2440, miR-218-5p, novel\_82, miR-490-5p, miR-3968, miR-499a-5p, miR-2284j, miR-363-3p, miR-2447, miR-361-3p, miR-877-3p, miR-378a-3p, miR-378i, miR-148a-5p, miR-2284u, miR-34a-5p, miR-361-5p, miR-33b-3p, miR-30d-3p, miR-212-5p, miR-106a, miR-18a-3p, miR-328-3p, miR-92a-1-5p, miR-422a, miR-324-3p, miR-219b-5p, miR-210-5p, novel\_17, miR-486-3p, miR-2424, miR-181b-1-3p, miR-664b-3p, miR-487b-5p, miR-500a-3p, miR-2285c, miR-339b, miR-296-3p, miR-548o-3p, miR-32-5p, miR-504-5p, miR-30c-1-3p, miR-10a, miR-665, miR-30a-3p, miR-30e-3p, miR-500, miR-129-5p, novel\_74, miR-129-2-3p, miR-3074-5p, miR-346, miR-6525, miR-769-5p, miR-194-5p, miR-1434-3p, miR-1285, miR-7862, miR-219a-1-3p, miR-30b-5p, miR-574-3p, miR-1388-3p, miR-2330-5p, miR-628-5p, miR-378a-5p, miR-3085-3p, miR-3955-5p, miR-31-5p, novel\_4, miR-339-5p, miR-26b-3p, miR-2285g, miR-185-5p, miR-149-5p, miR-9788-3p, miR-2285e, miR-296-5p, miR-873a-5p, miR-301b-5p, miR-22-3p, miR-30b-3p, miR-138, miR-30b-3p, miR-3120-5p, miR-2285x, let-7i-3p, miR-24-3p, novel\_27, miR-2285m, miR-33a-3p, miR-301a-5p, miR-128-1-5p, miR-421-5p, miR-22-5p, miR-3064-5p, novel\_68, miR-3074-5p, miR-7689-3p, miR-7977, miR-3596, miR-3082-5p, miR-6535, miR-203-3p, miR-361-3p, miR-18a-3p, miR-19a-3p, miR-3064-5p, miR-4286, novel\_39, miR-486-3p, miR-3065-3p, miR-2285b, miR-1271-3p, miR-200c, miR-125a-3p, miR-210-5p, miR-339a, miR-185-3p, miR-28-3p, miR-200c-3p, novel\_127, miR-18a-3p, miR-429-3p, miR-3600, novel\_79, miR-200b, novel\_83, miR-2300b-3p, miR-885-3p, miR-19b-3p, miR-133a-3p, miR-200b-3p, miR-539-5p, miR-28a-3p, miR-3074-5p, miR-3074-2-3p, miR-6134, miR-338-3p, miR-410-5p, miR-551b-3p, miR-132-5p, miR-665, miR-138-5p, miR-664a, miR-487b-5p, miR-500, miR-486b-3p, miR-2331-3p, miR-874-3p, miR-3065-3p, miR-2355-5p, miR-1271, miR-22-3p, miR-2285c, miR-500a-3p, miR-339b, miR-885-3p, miR-1827, miR-485-5p

miR-124a, miR-101b-3p, miR-199b-5p, miR-103a-2-5p, miR-342, miR-320b, novel\_115, miR-1306-5p, miR-326, miR-29b-1-5p, miR-455-3p, miR-9788-3p, miR-221-3p, miR-2285e, miR-1185-3p, miR-330-3p, miR-2284aa, miR-21b, miR-1839-5p, miR-2284r, miR-1a-3p, miR-877-3p, novel\_111, miR-2447, miR-2285f, miR-181d-5p, miR-3968, miR-499a-5p, miR-490-5p, miR-2284q, miR-2285n, miR-769-5p, miR-107-5p, miR-2483-3p, miR-1185-2-3p, miR-664b, miR-499b-5p, miR-668-5p, miR-1983, miR-140-5p, miR-221, miR-199b-5p, miR-378j, miR-129b-5p, miR-29b-1-5p, miR-2424, miR-380-3p, miR-183-5p, miR-195a-3p, miR-320d, miR-3653-3p, novel\_17, miR-210-5p, miR-2285p, miR-216a-5p, miR-345-3p, miR-122-3p, miR-487a-3p, miR-7859, miR-200b, miR-151-5p, miR-328-3p, miR-548e-3p, miR-212-5p, miR-485-3p, miR-493-3p, miR-19b-3p, miR-142-3p, miR-378d, miR-2366, miR-124-3p, miR-5703, miR-769-5p, miR-206-3p, miR-181c-5p, miR-3184-3p, miR-129-2-3p, miR-425-5p, miR-155-5p, miR-6516-3p, miR-500, miR-129-5p, miR-708-5p, miR-130b-5p, miR-2285j, miR-29b-2-5p, miR-2284s, miR-204-3p, miR-22-3p, miR-151b, miR-155-5p, miR-660-5p, miR-1277-3p, miR-216b-3p, miR-296-3p, miR-2312, novel\_99, miR-1827, miR-2285c, miR-500a-3p, miR-27b-5p, miR-432-3p, miR-432-3p, miR-539-3p, miR-130b-5p, miR-6240, miR-378a-5p, miR-660, miR-466f-3p, miR-330-3p, miR-105-5p, miR-2331-5p, miR-2411-3p, miR-2285g, novel\_116, miR-149-5p, miR-411-5p, miR-187-3p, miR-3955-5p, miR-122-3p, miR-380-3p, miR-1260b, miR-181a-5p, miR-2113, miR-1434-3p, miR-22-3p, novel\_23, miR-326-3p, novel\_27, miR-199b-5p, miR-2428, miR-342-3p, novel\_120, miR-495-3p, miR-2285x, miR-206, miR-502b, miR-4324, miR-485-3p, novel\_87, miR-320c, miR-144-3p, miR-669, miR-3120-3p, miR-412-3p, miR-19a-3p, miR-9851-3p, miR-135b-5p, miR-6395, miR-2285ab, miR-376b-5p, miR-2327, miR-1306, miR-331-3p, miR-301a-5p, miR-665, miR-29b-2-5p, miR-138-5p, miR-664a, miR-874-5p, miR-145a-3p, miR-371b-3p, miR-502-3p, miR-361-3p, miR-625-5p, miR-485-5p, miR-3064-5p, miR-2331-3p, miR-370-3p, miR-296-3p, miR-300-3p, miR-6535, miR-4443, miR-500-3p, miR-29b-1-5p, miR-92a-1-5p, miR-185-3p, miR-2898, miR-3085-3p, miR-491-5p, novel\_96, miR-29b-2-5p, miR-3064-5p, miR-29b-1-5p, miR-432-3p, miR-296-5p, miR-542-3p, miR-301b-5p, miR-501-3p, miR-2904, miR-501-3p, miR-138

STEAP4 ENSOARGO( STEAP fa) miR-380-3p, miR-3653-3p, miR-380-3p  
miR-19a-3p, miR-136-5p, miR-1291, miR-9-3p, miR-6395, miR-411b-3p, miR-2284g, miR-541-5p, miR-206, miR-374a-3p, miR-301b-3p, miR-8095, miR-9-3p, miR-2426, miR-2284aa, miR-412-3p, miR-1a-3p, miR-3431, miR-539-5p, miR-148b-5p, novel\_116, miR-548w, miR-105-1, miR-130a-3p, miR-130b-3p, miR-105-5p, miR-8485, let-7j, miR-130b-5p, miR-2284b, miR-1248, miR-331-5p, miR-655, miR-487b-5p, miR-301a-3p, miR-548o-3p, miR-141-3p, miR-1271, miR-331-5p, miR-130b-5p, miR-669a-3p, miR-486b-3p, miR-410-3p, miR-454-3p, miR-494-5p, miR-655-3p, miR-206-3p, miR-374a-3p, miR-19b-3p, miR-33b-3p, miR-2284u, miR-361-5p, miR-148a-5p, miR-105-2, miR-222-5p, miR-383-5p, miR-328-3p, miR-2284z, miR-412, miR-200a-3p, novel\_17, miR-486-3p, miR-2284y, miR-29a-5p, miR-200a, miR-1

ELL ENSOARGO( elongati) miR-380-3p, miR-3653-3p, miR-380-3p  
miR-19a-3p, miR-136-5p, miR-1291, miR-9-3p, miR-6395, miR-411b-3p, miR-2284g, miR-541-5p, miR-206, miR-374a-3p, miR-301b-3p, miR-8095, miR-9-3p, miR-2426, miR-2284aa, miR-412-3p, miR-1a-3p, miR-3431, miR-539-5p, miR-148b-5p, novel\_116, miR-548w, miR-105-1, miR-130a-3p, miR-130b-3p, miR-105-5p, miR-8485, let-7j, miR-130b-5p, miR-2284b, miR-1248, miR-331-5p, miR-655, miR-487b-5p, miR-301a-3p, miR-548o-3p, miR-141-3p, miR-1271, miR-331-5p, miR-130b-5p, miR-669a-3p, miR-486b-3p, miR-410-3p, miR-454-3p, miR-494-5p, miR-655-3p, miR-206-3p, miR-374a-3p, miR-19b-3p, miR-33b-3p, miR-2284u, miR-361-5p, miR-148a-5p, miR-105-2, miR-222-5p, miR-383-5p, miR-328-3p, miR-2284z, miR-412, miR-200a-3p, novel\_17, miR-486-3p, miR-2284y, miR-29a-5p, miR-200a, miR-1

LRRC40 ENSOARGO( leucine) miR-380-3p, miR-3653-3p, miR-380-3p  
miR-19a-3p, miR-136-5p, miR-1291, miR-9-3p, miR-6395, miR-411b-3p, miR-2284g, miR-541-5p, miR-206, miR-374a-3p, miR-301b-3p, miR-8095, miR-9-3p, miR-2426, miR-2284aa, miR-412-3p, miR-1a-3p, miR-3431, miR-539-5p, miR-148b-5p, novel\_116, miR-548w, miR-105-1, miR-130a-3p, miR-130b-3p, miR-105-5p, miR-8485, let-7j, miR-130b-5p, miR-2284b, miR-1248, miR-331-5p, miR-655, miR-487b-5p, miR-301a-3p, miR-548o-3p, miR-141-3p, miR-1271, miR-331-5p, miR-130b-5p, miR-669a-3p, miR-486b-3p, miR-410-3p, miR-454-3p, miR-494-5p, miR-655-3p, miR-206-3p, miR-374a-3p, miR-19b-3p, miR-33b-3p, miR-2284u, miR-361-5p, miR-148a-5p, miR-105-2, miR-222-5p, miR-383-5p, miR-328-3p, miR-2284z, miR-412, miR-200a-3p, novel\_17, miR-486-3p, miR-2284y, miR-29a-5p, miR-200a, miR-1

PTPRG ENSOARGO( protein) miR-380-3p, miR-3653-3p, miR-380-3p  
miR-19a-3p, miR-136-5p, miR-1291, miR-9-3p, miR-6395, miR-411b-3p, miR-2284g, miR-541-5p, miR-206, miR-374a-3p, miR-301b-3p, miR-8095, miR-9-3p, miR-2426, miR-2284aa, miR-412-3p, miR-1a-3p, miR-3431, miR-539-5p, miR-148b-5p, novel\_116, miR-548w, miR-105-1, miR-130a-3p, miR-130b-3p, miR-105-5p, miR-8485, let-7j, miR-130b-5p, miR-2284b, miR-1248, miR-331-5p, miR-655, miR-487b-5p, miR-301a-3p, miR-548o-3p, miR-141-3p, miR-1271, miR-331-5p, miR-130b-5p, miR-669a-3p, miR-486b-3p, miR-410-3p, miR-454-3p, miR-494-5p, miR-655-3p, miR-206-3p, miR-374a-3p, miR-19b-3p, miR-33b-3p, miR-2284u, miR-361-5p, miR-148a-5p, miR-105-2, miR-222-5p, miR-383-5p, miR-328-3p, miR-2284z, miR-412, miR-200a-3p, novel\_17, miR-486-3p, miR-2284y, miR-29a-5p, miR-200a, miR-1

SERPINH1 ENSOARGO( serpin p miR-24-3p, miR-30c-1-3p, miR-361-3p, miR-2428, miR-6134, miR-1285-5p, miR-3065-3p, miR-2330-5p, miR-1388-3p, miR-665-5p, miR-664a, miR-200a-3p, miR-185-3p, miR-30c-2-3p, miR-323-5p, miR-134-3p, miR-378g, miR-323a-5p, novel\_4, miR-30c-1-3p, miR-141-3p, miR-3065-3p, miR-30b-3p, miR-744-5p, miR-1827, miR-4508, miR-296-5p, miR-5703, miR-30b-3p, miR-302b, miR-625-3p, miR-22-5p, miR-6529b, miR-1247-3p, miR-326-3p, miR-24-3p, miR-371b-3p, novel\_101, miR-17-3p, miR-335-5p, miR-135a-2-3p, miR-6395, miR-505-3p, miR-9851-3p, miR-410-5p, miR-669, miR-670-3p, novel\_69, miR-374c-3p, miR-299b-3p, miR-146b-3p, miR-323a-5p, miR-3120-3p, miR-320b, miR-216b-3p, miR-378b, miR-3074-5p, miR-378a-5p, novel\_51, miR-2411-3p, miR-2331-5p, miR-197-5p, miR-377-3p, miR-224-5p, miR-7-5p, miR-345-5p, miR-432-3p, miR-654-3p, let-7f-2-3p, let-7f-2-3p, miR-363-5p, miR-493-5p, miR-130b-5p, miR-2889, miR-27b-3p, miR-4508, miR-16-1-3p, miR-1260b, miR-1843b-5p, miR-7b-5p, miR-544b, miR-3431, miR-185-5p, miR-26b-3p, miR-339-5p, miR-31-5p, miR-592, miR-486b-3p, miR-767-5p, miR-331-3p, miR-135a-1-3p, miR-1260b, novel\_42, miR-671-5p, miR-23a-5p, miR-7144-5p, miR-345-5p, miR-767, miR-10b-3p, miR-3154, miR-381-3p, miR-488-3p, miR-374c-3p, miR-300-3p, miR-1271, miR-2355-5p, miR-543-5p, miR-191-3p, miR-450a-2-3p, miR-17-3p, miR-2898, miR-339a, miR-30c-2-3p, miR-1260a, miR-1271-3p, miR-490-3p, miR-3065-3p, miR-181a-2-3p, miR-300, miR-330-5p, miR-1290, miR-345-3p, miR-3591-5p, miR-2284z, novel\_79, miR-429-3p, miR-6517, miR-299a-3p, miR-2285ad, miR-490-5p, miR-2285t, miR-335, miR-4726-5p, miR-3968, miR-101-3p, miR-2285n, miR-361-3p, miR-877-3p, miR-541-3p, miR-2447, novel\_94, miR-493-5p, miR-378j, miR-1185-2-3p, miR-27a-3p, miR-4443, miR-203-3p, miR-7857-3p, miR-20a-3p, miR-3955-3p, miR-326, miR-199a-3p, miR-4532, miR-30c-1-3p, miR-33a-5p, let-7c-3p, miR-2330-5p, miR-1388-3p, miR-3120-5p, miR-2284aa, miR-21b, miR-544a, miR-541, miR-484, miR-421, miR-1185-3p, miR-455-3p, miR-147a, miR-27a-3p, miR-1343-3p, miR-2300a-5p, miR-130b-5p, miR-4492, miR-17-3p, miR-338-5p, miR-665, miR-3604, miR-320e, miR-122-5p, miR-224-5p, miR-6525, miR-125-5p, miR-3058-5p, miR-145a-3p, miR-1510, miR-3064-5p, miR-503-5p, miR-503-5p, miR-5126, miR-326, miR-3085-3p, miR-25-5p, miR-6517, miR-1343-3p, miR-194-3p, miR-134-5p, miR-503-5p, miR-197-3p, miR-330-5p, miR-134, miR-7862, miR-885-3p, miR-142-3p, novel\_101, miR-326-3p, miR-338-3p, miR-1307-3p, miR-1973, miR-665, miR-2433, miR-6529b, miR-134-5p, miR-4726-5p, miR-615-5p, miR-3064-5p, miR-361-3p, miR-2387, miR-885-3p, miR-425-5p, miR-324-3p, miR-34c, miR-669a-3p, miR-2330-3p, miR-877-3p, miR-449a, novel\_27, miR-9-3p, miR-200a-5p, miR-339b, miR-147-3p, miR-1827, miR-9-3p, miR-7975, miR-3064-5p, miR-499b-5p, miR-34b, miR-489, miR-34c-5p, miR-499b-3p, miR-499a-3p, miR-22-3p, miR-339a, miR-219b-5p, miR-124-5p, miR-3085-3p, miR-34b-5p, miR-3064-5p, miR-1246, miR-873a-5p, miR-125b-2-3p, miR-3071-5p, miR-22-3p, miR-34a-5p, miR-3120-5p, miR-133b-5p, miR-340-3p, novel\_79, miR-339-5p, miR-455-3p

UPK2 ENSOARGO( uroplaki: 1271, miR-2355-5p, miR-543-5p, miR-191-3p, miR-450a-2-3p, miR-17-3p, miR-2898, miR-339a, miR-30c-2-3p, miR-1260a, miR-1271-3p, miR-490-3p, miR-3065-3p, miR-181a-2-3p, miR-300, miR-330-5p, miR-1290, miR-345-3p, miR-3591-5p, miR-2284z, novel\_79, miR-429-3p, miR-6517, miR-299a-3p, miR-2285ad, miR-490-5p, miR-2285t, miR-335, miR-4726-5p, miR-3968, miR-101-3p, miR-2285n, miR-361-3p, miR-877-3p, miR-541-3p, miR-2447, novel\_94, miR-493-5p, miR-378j, miR-1185-2-3p, miR-27a-3p, miR-4443, miR-203-3p, miR-7857-3p, miR-20a-3p, miR-3955-3p, miR-326, miR-199a-3p, miR-4532, miR-30c-1-3p, miR-33a-5p, let-7c-3p, miR-2330-5p, miR-1388-3p, miR-3120-5p, miR-2284aa, miR-21b, miR-544a, miR-541, miR-484, miR-421, miR-1185-3p, miR-455-3p, miR-147a, miR-27a-3p, miR-1343-3p, miR-2300a-5p, miR-130b-5p, miR-4492, miR-17-3p, miR-338-5p, miR-665, miR-3604, miR-320e, miR-122-5p, miR-224-5p, miR-6525, miR-125-5p, miR-3058-5p, miR-145a-3p, miR-1510, miR-3064-5p, miR-503-5p, miR-503-5p, miR-5126, miR-326, miR-3085-3p, miR-25-5p, miR-6517, miR-1343-3p, miR-194-3p, miR-134-5p, miR-503-5p, miR-197-3p, miR-330-5p, miR-134, miR-7862, miR-885-3p, miR-142-3p, novel\_101, miR-326-3p, miR-338-3p, miR-1307-3p, miR-1973, miR-665, miR-2433, miR-6529b, miR-134-5p, miR-4726-5p, miR-615-5p, miR-3064-5p, miR-361-3p, miR-2387, miR-885-3p, miR-425-5p, miR-324-3p, miR-34c, miR-669a-3p, miR-2330-3p, miR-877-3p, miR-449a, novel\_27, miR-9-3p, miR-200a-5p, miR-339b, miR-147-3p, miR-1827, miR-9-3p, miR-7975, miR-3064-5p, miR-499b-5p, miR-34b, miR-489, miR-34c-5p, miR-499b-3p, miR-499a-3p, miR-22-3p, miR-339a, miR-219b-5p, miR-124-5p, miR-3085-3p, miR-34b-5p, miR-3064-5p, miR-1246, miR-873a-5p, miR-125b-2-3p, miR-3071-5p, miR-22-3p, miR-34a-5p, miR-3120-5p, miR-133b-5p, miR-340-3p, novel\_79, miR-339-5p, miR-455-3p

OSBP ENSOARGO( oxystero 7862, miR-885-3p, miR-142-3p, novel\_101, miR-326-3p, miR-338-3p, miR-1307-3p, miR-1973, miR-665, miR-2433, miR-6529b, miR-134-5p, miR-4726-5p, miR-615-5p, miR-3064-5p, miR-361-3p, miR-2387, miR-885-3p, miR-425-5p, miR-324-3p, miR-34c, miR-669a-3p, miR-2330-3p, miR-877-3p, miR-449a, novel\_27, miR-9-3p, miR-200a-5p, miR-339b, miR-147-3p, miR-1827, miR-9-3p, miR-7975, miR-3064-5p, miR-499b-5p, miR-34b, miR-489, miR-34c-5p, miR-499b-3p, miR-499a-3p, miR-22-3p, miR-339a, miR-219b-5p, miR-124-5p, miR-3085-3p, miR-34b-5p, miR-3064-5p, miR-1246, miR-873a-5p, miR-125b-2-3p, miR-3071-5p, miR-22-3p, miR-34a-5p, miR-3120-5p, miR-133b-5p, miR-340-3p, novel\_79, miR-339-5p, miR-455-3p

RAPGEF5 ENSOARGO( Rap guan 3p, miR-499a-3p, miR-22-3p, miR-339a, miR-219b-5p, miR-124-5p, miR-3085-3p, miR-34b-5p, miR-3064-5p, miR-1246, miR-873a-5p, miR-125b-2-3p, miR-3071-5p, miR-22-3p, miR-34a-5p, miR-3120-5p, miR-133b-5p, miR-340-3p, novel\_79, miR-339-5p, miR-455-3p

miR-199a-5p, miR-130a-5p, miR-181b-1-3p, miR-2478, miR-29b-1-5p, miR-29b-2-5p, miR-2484, miR-152-3p, miR-181b-5p, miR-500a-5p, miR-30f, miR-219-3p, miR-374a-5p, miR-1260a, miR-376b-3p, miR-148b-3p, miR-23c, miR-23b-3p, miR-18b-5p, miR-3600, miR-1b-3p, miR-142-3p, miR-2300b-3p, miR-1260b, miR-224-5p, miR-3074-5p, miR-130b-5p, miR-374b-3p, miR-592, miR-6516-3p, miR-29b-2-5p, miR-409-3p, miR-219b-3p, novel\_63, miR-877-5p, miR-199a-5p, miR-323-5p, miR-582-5p, miR-3068-3p, miR-32-3p, novel\_99, miR-1827, miR-582-5p, miR-543-3p, miR-18a-5p, miR-433-3p, miR-18a, miR-23b, miR-488-3p, miR-491-3p, miR-1b-5p, let-7f-2-3p, let-7f-2-3p, miR-23a-3p, miR-494-3p, miR-6240, miR-382-3p, miR-130b-5p, miR-199b-5p, miR-378a-5p, miR-29b-1-5p, miR-330-3p, miR-2285v, miR-224-5p, miR-2459, miR-1185-3p, miR-455-3p, miR-376b-3p, miR-27a-3p, miR-145b, miR-181b-2-3p, miR-330-3p, miR-2284x, miR-27b-3p, miR-299a-5p, miR-1260b, miR-101a-5p, miR-145a-5p, miR-143-5p, miR-873a-5p, miR-219a-2-3p, miR-154a, miR-199b-5p, miR-877-3p, miR-181d-5p, miR-452-5p, miR-3956-3p, miR-3059-5p, novel\_60, miR-32-3p, miR-147-5p, miR-490-5p, novel\_1, miR-371a-5p, miR-1185-2-3p, miR-376d, miR-27a-3p, miR-181b-3p, miR-203-3p, miR-677, miR-6535, miR-489, miR-411b-3p, miR-323a-5p, miR-499b-5p, miR-655-5p, miR-3074-5p, novel\_94, miR-376a-3p, miR-2319a, miR-299b-5p, miR-376b-3p, miR-148a-3p, miR-199b-5p, miR-18b

METTL11B ENSOARGO(methyltr: miR-669, miR-27a-3p, miR-323a-5p, miR-2404, miR-34b, miR-2285u, miR-4792, novel\_68, miR-195a-5p, miR-216a-3p, miR-361-3p, miR-148a-3p, miR-449a, miR-423-5p, miR-361-3p, miR-371b-3p, miR-1296-5p, miR-1193, novel\_60, miR-335-5p, miR-3956-3p, miR-34c, miR-16a, miR-15a, miR-4324, miR-1247-3p, miR-2440, miR-9788-3p, miR-2355-3p, miR-185-5p, miR-27a-3p, miR-145b, miR-31-5p, miR-2300a-5p, miR-497-5p, miR-744-5p, miR-27b-3p, miR-16b, miR-1260b, miR-2426, miR-22-3p, miR-197-3p, miR-125b-2-3p, miR-145a-5p, miR-873a-5p, miR-2284r, miR-542-3p, miR-4532, let-7a-2-3p, miR-424-5p, miR-125a-5p, miR-214-3p, miR-378a-5p, miR-365b-5p, miR-16b, miR-22-3p, miR-15b-5p, miR-151b, miR-34c-5p, miR-323-5p, miR-370-5p, miR-2355-5p, miR-125a, miR-1271, miR-2331-3p, miR-1827, let-7g-3p, miR-21a-3p, miR-365a-5p, miR-3184-5p, miR-6525, miR-1260b, miR-16-5p, miR-214, miR-1306-5p, miR-424-5p, miR-874-5p, miR-486b-3p, miR-132-5p, miR-125b-5p, miR-370-5p, miR-151-5p, miR-532-3p, miR-505-5p, miR-322-5p, miR-15a-5p, miR-148b-3p, miR-3600, miR-212-5p, miR-6517, miR-128-3p, let-7a-2-3p, miR-34a-5p, miR-2904, miR-188-3p, miR-2366, miR-486-3p, miR-125b-2-3p, miR-34b-5p, miR-152-3p, miR-21-3p, miR-760-3p, miR-125b, miR-185-3p, miR-2285af, miR-1260a, miR-125a-3p

PFKL ENSOARGO(phosphof: miR-214-3p, miR-378a-5p, miR-365b-5p, miR-16b, miR-22-3p, miR-15b-5p, miR-151b, miR-34c-5p, miR-323-5p, miR-370-5p, miR-2355-5p, miR-125a, miR-1271, miR-2331-3p, miR-1827, let-7g-3p, miR-21a-3p, miR-365a-5p, miR-3184-5p, miR-6525, miR-1260b, miR-16-5p, miR-214, miR-1306-5p, miR-424-5p, miR-874-5p, miR-486b-3p, miR-132-5p, miR-125b-5p, miR-370-5p, miR-151-5p, miR-532-3p, miR-505-5p, miR-322-5p, miR-15a-5p, miR-148b-3p, miR-3600, miR-212-5p, miR-6517, miR-128-3p, let-7a-2-3p, miR-34a-5p, miR-2904, miR-188-3p, miR-2366, miR-486-3p, miR-125b-2-3p, miR-34b-5p, miR-152-3p, miR-21-3p, miR-760-3p, miR-125b, miR-185-3p, miR-2285af, miR-1260a, miR-125a-3p

miR-134, miR-3591-5p, miR-10a-5p, let-7a-2-3p, miR-10b-2, miR-128-3p, miR-582-3p, miR-411-3p, miR-18b-5p, miR-6517, miR-2285ad, miR-129-1-3p, novel\_121, miR-582-3p, miR-134-5p, miR-450a-1-3p, miR-2411-5p, miR-322-5p, miR-205-5p, miR-200a-3p, miR-543-5p, miR-92a-3p, miR-107, miR-1a-2-5p, miR-29b-2-5p, miR-30a-3p, miR-3529-3p, miR-490-3p, miR-1271-3p, miR-376b-5p, miR-1957a, miR-376c-5p, miR-148b-5p, miR-92b-3p, miR-376c-5p, miR-18a, miR-200a-5p, miR-137-3p, miR-671-5p, miR-3074-1-3p, miR-376c-5p, miR-329b, novel\_91, let-7g-3p, miR-10a-3p, miR-141-3p, miR-2284n, miR-34c-5p, miR-135a-5p, miR-144, novel\_63, miR-1-5p, miR-2284k, miR-134-5p, miR-28-5p, miR-103b, miR-6128, miR-16-5p, miR-3607-3p, miR-2284v, miR-1306-5p, miR-323-3p, miR-3071-5p, miR-22-3p, miR-450c-3p, miR-181a-5p, miR-1285, miR-1434-3p, miR-432, miR-2284x, miR-27b-3p, miR-188-5p, miR-497-5p, miR-16-1-3p, miR-380-3p, miR-2284ab, miR-103a-3p, miR-31-5p, miR-2355-3p, miR-103, miR-432-5p, miR-2284d, miR-412-5p, miR-32, miR-105-5p, miR-330-3p, miR-377-3p, miR-224-5p, miR-124-5p, miR-6240, let-7a-2-3p, miR-2284l, miR-216a-3p, miR-3065-5p, miR-1306, miR-150-5p, miR-18b, miR-2285ab, miR-376b-5p, miR-195a-5p, miR-6395, miR-135b-5p, miR-107, miR-410-5p, miR-10a-5p, novel\_68, miR-181b-3p, miR-669, miR-144-3p, miR-677, novel\_69, miR-34b, miR-2404, miR-382-5p, miR-34c, miR-16a, miR-576-3p, miR-133a-5p, miR-147-5p, miR-625-3p, novel\_1, miR-379-3p, miR-92a-3p, miR-6119-3p, novel\_101, miR-495-3p, miR-2285x, miR-1a-1-5p, miR-335-5p, miR-219b-3p, novel\_120, miR-2284w, miR-449a, miR-24-3p, miR-5703, miR-124-3p, miR-98-3p, miR-2366, miR-30c-5p, let-7a-3p, miR-361-5p, miR-34a-5p, miR-16-1-3p, miR-664-5p, miR-33b-3p, miR-30d-3p, miR-1b-3p, miR-548e-3p, miR-328-3p, miR-15a-5p, miR-7859, miR-92a-1-5p, miR-618, miR-2484, miR-34b-5p, miR-760-3p, miR-2284m, miR-10a-5p, miR-544a, miR-22-3p, miR-18a-3p, miR-411-5p, miR-22-3p, miR-544b, miR-544-3p, miR-25, miR-2404, miR-212-5p, miR-182-5p, miR-574-5p, miR-18a-3p, miR-199b-3p, miR-378b, miR-452-3p, novel\_127, miR-199c, miR-182-5p, miR-196a-3p, miR-2330-3p

PNISR

ENSOARGO(C PNN-inte

DPP10

ENSOARGO(C dipeptid



miR-24-1-5p, miR-228bu, miR-2b, miR-3082-5p, miR-203-3p, miR-4443, miR-140-5p, miR-221, miR-381-3p, miR-2447, miR-363-3p, miR-2285f, miR-2284j, miR-101-3p, miR-2285y, miR-7134-3p, novel\_78, miR-1343-3p, miR-330-3p, miR-2300a-5p, miR-147a, miR-221-3p, miR-455-3p, miR-421, miR-2285e, miR-484, miR-6529a, miR-323b, miR-125b-2-3p, miR-758-3p, miR-1388-5p, miR-2284aa, miR-106a-5p, miR-23a-3p, miR-30c-1-3p, miR-758-3p, miR-320b, miR-199a-3p, miR-326, novel\_103, miR-323b-3p, miR-29b-1-5p, miR-106b-5p, novel\_124, miR-1185-5p, miR-487b-5p, miR-30c-1-3p, miR-32-5p, miR-2331-3p, miR-548o-3p, miR-216b-5p, miR-193b-3p, novel\_25, novel\_32, miR-204-3p, miR-877-5p, let-7f-1-3p, miR-2285c, miR-433-3p, miR-2312, miR-345-5p, miR-18a-5p, miR-543-3p, novel\_99, miR-186-5p, miR-1827, miR-539-5p, miR-425-5p, miR-3074-2-3p, miR-98-3p, miR-224-5p, miR-181c-5p, let-7b-3p, miR-222-3p, miR-324-3p, miR-3604, miR-29b-2-5p, miR-320e, miR-664a, miR-6516-3p, miR-17-3p, miR-487b-5p, miR-155-5p, miR-208b-5p, miR-106a, miR-485-3p, miR-23b-3p, miR-487a-3p, miR-340-5p, miR-200b, miR-222-5p, novel\_83, miR-199a-3p, miR-191, miR-2366, miR-1246, miR-98-3p, miR-1434-5p, miR-5703, miR-33b-3p, novel\_73, miR-4429, miR-133a-3p, let-7a-3p, miR-361-5p, miR-503-5p, miR-20a, miR-345-3p, miR-376a-5p, miR-29b-1-5p, miR-130a-5p, miR-377-5p, miR-125b-2-3p, miR-26a-5p, miR-210-5p, miR-219b-5p, miR-106a, miR-2284m, miR-320d, miR-466i-5p, miR-2484, miR-2404, miR-374c-3p, miR-320c, miR-2285ab, miR-18b, miR-3970, miR-378b, miR-3065-5p, miR-6516-3p, miR-193b-3p, miR-2285x, miR-17-3p, miR-495-3p, miR-3959-3p, miR-326-3p, novel\_27, miR-2428, miR-2284w, miR-4324, miR-142b, miR-133a-5p, miR-20a-5p, miR-576-3p, miR-485-3p, novel\_87, miR-92a-3p, miR-656-5p, miR-625-3p, miR-203b-5p, miR-31-5p, miR-187-3p, miR-133b-5p, miR-665, miR-377-5p, miR-2284d, miR-

miR-18b-5p, miR-106a, miR-18a-3p, miR-299a-3p, miR-2284h-5p, miR-134-5p, miR-222-5p, miR-1193, miR-140-3p, miR-1343-5p, miR-134, miR-2300b-3p, miR-19b-3p, miR-20a, miR-2285w, miR-1271-3p, miR-1957a, novel\_39, miR-185-3p, miR-92a-1-5p, miR-324-3p, miR-542-5p, miR-299-3p, novel\_96, novel\_127, miR-106a, miR-2898, miR-296-3p, miR-874-3p, miR-504-5p, miR-574-5p, novel\_25, miR-204-3p, miR-301a-3p, miR-17-5p, miR-18a, miR-93-5p, miR-301, miR-1827, miR-20b-5p, miR-18a-5p, novel\_42, miR-3184-5p, miR-93, miR-665, miR-135a-1-3p, miR-134-5p, miR-130b-5p, miR-454-3p, miR-874-5p, miR-664a, novel\_9, miR-138-5p, miR-222-5p, miR-130a-3p, novel\_4, miR-2300a-5p, miR-133b-5p, miR-2459, miR-20b, miR-9788-3p, miR-216a-3p, miR-455-3p, miR-134-3p, miR-147a, miR-30b-3p, miR-1285, miR-541, miR-542-3p, miR-1843b-5p, miR-296-5p, miR-2284r, miR-3120-5p, miR-744-5p, miR-4508, miR-138, miR-30b-3p, miR-106a-5p, miR-2330-5p, miR-130b-5p, miR-4532, miR-106b-5p, novel\_51, miR-17-5p, miR-106a-5p, miR-3141, miR-542-5p, miR-1343-5p, miR-130b-3p, miR-491-5p, miR-452-3p, miR-6535, novel\_69, miR-299b-3p, miR-378g, miR-381-3p, miR-18a-3p, miR-2387, miR-3141, miR-18b, miR-361-3p, miR-379-5p, novel\_94, miR-1983, miR-19a-3p, miR-412-3p, miR-504, miR-542-5p, miR-1296-5p, miR-541-3p, miR-3956-3p, miR-2447, novel\_60, miR-301b-3p, miR-423-5p, miR-877-3p, miR-361-3p, miR-20a-5p, miR-4324, miR-128-1-5p, miR-4726-5p, miR-190a-3p, miR-493-5p, miR-876-3p, miR-378b, miR-144-3p, miR-216b-5p, miR-377-3p, miR-7857-3p, miR-532-5p, miR-2319b, miR-140-5p, miR-31-3p, novel\_74, miR-33a-3p, miR-144, miR-100-3p, miR-576-3p, miR-24-3p, miR-224-5p, miR-452-5p, miR-532-3p, miR-2284h-5p, miR-330-3p, miR-2484, miR-330-3p, miR-3071-3p, miR-324-3p, miR-377-3p, miR-224-5p, novel\_39, miR-6240, miR-493-5p, miR-2285w, miR-10a-3p, miR-124a, miR-6240, miR-2330-5p, miR-495-5p, miR-29b-2-5p, miR-5100, miR-377-5p, miR-486-3p, miR-143-3p, miR-320b, miR-1306-5p, novel\_17, miR-542-5p, miR-6119-5p, miR-505, miR-330-3p, miR-320d, miR-378a-5p, miR-127-5p, miR-543-5p, miR-21-3p, miR-542-5p, miR-2300a-5p, miR-330-3p, miR-1224-5p, miR-377-5p, miR-185-5p, novel\_83, miR-9788-3p, miR-129-1-3p, miR-2459, miR-2284r, miR-873a-5p, miR-22-3p, miR-124-3p, miR-1197-5p, miR-4429, miR-3120-5p, miR-129-2-3p, miR-542-5p, miR-2440, miR-29b-2-5p, miR-320e, miR-425-5p, miR-3968, miR-664a, miR-1843a-3p, miR-147-5p, miR-486b-3p, miR-2355-5p, miR-320c, miR-22-3p, miR-1306, miR-320a, miR-10a-3p, miR-1248, miR-485-5p

PLEKHG5 ENSOARGO(pleckstr

MOSPD2 ENSOARGO(motile s

NECAP2 ENSOARGO(NECAP en

novel\_9, miR-138-5p, miR-204-5p, miR-486b-3p, miR-28-5p, miR-378c, miR-345-5p, let-7g-3p, miR-876-3p, miR-1814c, miR-7144-5p, miR-488-3p, miR-137-3p, miR-769, miR-199a-5p, miR-487a-3p, miR-141-3p, let-7f-5p, miR-200c-3p, miR-200a-3p, novel\_127, miR-107, miR-200c, miR-6119-5p, miR-2285af, miR-205-5p, let-7c-5p, miR-24-2-5p, miR-450b-5p, miR-2478, miR-200a, let-7g, miR-2284y, miR-199a-5p, miR-495-5p, miR-30a-3p, miR-3064-5p, let-7d, miR-200b-3p, miR-1290, miR-196a-5p, miR-2427, miR-2411-5p, miR-378h, miR-9-5p, miR-302a-5p, miR-24-2-5p, miR-2284z, miR-429-3p, miR-2285ad, miR-147-5p, miR-656-5p, miR-133a-5p, miR-142b, miR-576-3p, let-7i, miR-33a-3p, miR-211, miR-199b-5p, novel\_27, miR-342-3p, novel\_101, miR-495-3p, miR-2285x, miR-107, miR-505-3p, miR-378f, let-7e-5p, miR-21c, miR-3591-3p, miR-18a-3p, miR-677, miR-669, miR-3074-5p, miR-329-5p, miR-2285l, miR-196b-5p, miR-224-5p, novel\_51, miR-330-3p, miR-432-3p, miR-654-3p, let-7a-2-3p, miR-345-5p, miR-6240, miR-130b-5p, miR-382, miR-21-5p, miR-138, miR-2113, novel\_23, let-7g-5p, miR-3431, miR-2285g, miR-103, miR-6238, miR-194-3p, miR-103a-3p, miR-133b-5p, miR-187-3p, miR-31-5p, miR-26b-3p, miR-130b-5p, miR-708-5p, miR-30e-3p, let-7f, miR-30a-3p, miR-224-5p, miR-346, miR-769-5p, let-7b-5p, miR-3074-5p, miR-145a-3p, miR-539-5p, let-7b, miR-378c, miR-590-3p, miR-3074-2-3p, miR-154b-3p, miR-345-5p, miR-2285c, let-7f-1-3p, miR-216b-5p, let-7i-5p, miR-221-5p, miR-140-5p, miR-378a-3p, miR-504-5p, miR-21-3p, miR-154a-3p, miR-466i-5p, miR-98-5p, let-7k, miR-221-5p, miR-2285p, novel\_17, miR-210-5p, miR-422a, miR-500a-5p, miR-130a-5p, miR-2432, miR-2411, miR-486-3p, miR-487a, miR-329a-5p, miR-345-3p, miR-142-3p, miR-378d, miR-148a-5p, miR-2284u, miR-361-5p, miR-1961, miR-378i, miR-1197-5p, miR-378a-3p, miR-290A, miR-200b, miR-340-5p, miR-1247-5p, miR-193b-3p, miR-377-3p, miR-3082-5p, miR-193b-3p, let-7j, miR-377-3p, miR-137-3p, novel\_74, miR-300, miR-874-5p, miR-193a-3p

novel\_74, miR-204-5p, miR-454-3p, miR-665, miR-664a-5p, miR-1197-3p, miR-181c-5p, miR-338-3p, miR-122-5p, miR-1306-5p, miR-1271, miR-3607-3p, let-7g-3p, miR-1248, miR-320a, miR-376c-5p, miR-25-3p, miR-499b-3p, miR-301a-3p, miR-2284s, miR-324-5p, miR-140-5p, miR-32-5p, miR-2355-5p, miR-216b-3p, miR-2285aa, miR-760-3p, miR-320d, miR-92a-3p, miR-2285p, miR-26a-5p, miR-376b-3p, miR-217, miR-450b-5p, miR-92b-3p, miR-3529-3p, miR-4429, miR-2366, miR-5703, miR-217-5p, miR-124-3p, miR-2904, miR-1271-5p, miR-483-3p, miR-505-5p, miR-7859, miR-199a-3p, miR-582-3p, miR-548e-3p, miR-412, novel\_1, miR-6119-3p, miR-92a-3p, miR-576-3p, novel\_87, miR-371b-3p, miR-211, miR-877-3p, miR-301b-3p, miR-363-3p, novel\_101, miR-2285x, miR-181d-5p, miR-6527, miR-668-5p, miR-96-5p, miR-877-3p, miR-376a-3p, miR-140-5p, miR-376b-5p, miR-376b-3p, miR-3065-5p, miR-378b, miR-2404, miR-25, miR-146b-3p, miR-499a-3p, miR-376d, miR-320c, miR-211-5p, miR-26b-5p, miR-130b-3p, miR-483-3p, miR-452-5p, miR-153-3p, novel\_103, miR-199a-3p, miR-320b, miR-455-5p, miR-32, miR-491-3p, miR-124a, let-7c-3p, miR-455-5p, miR-188-5p, miR-181a-5p, miR-2284r, miR-412-3p, miR-7857, miR-376b-3p, miR-1298-3p, miR-147a, miR-153, miR-126a-5p, miR-2459, miR-665, miR-130a-3p  
 miR-224-5p, miR-500b-5p, miR-323-3p, miR-6525, miR-142a-5p, miR-6516-3p, miR-134-5p, miR-486b-3p, miR-2284k, miR-665, novel\_25, miR-140-5p, miR-182-5p, miR-141-3p, miR-216b-3p, miR-345-5p, miR-345-5p, let-7g-3p, miR-543-3p, miR-30e-5p, miR-3154, miR-362-5p, miR-30d-5p, miR-320a, miR-148b-5p, miR-192-3p, novel\_39, miR-2424, miR-486-3p, miR-495-5p, miR-181b-5p, miR-320d, miR-2284m, miR-450a-2-3p, miR-200a-3p, miR-374a-5p, miR-345-3p, miR-500a-5p, miR-328-3p, miR-134-5p, miR-212-5p, miR-3600, miR-4429, miR-664-5p, miR-133a-3p, miR-16-1-3p, miR-2366, miR-134, miR-345-3p, novel\_133, miR-5703, miR-30a-5p, miR-362-5p, miR-2428, miR-374c-5p, novel\_101, miR-181d-5p, miR-2284j, miR-4726-5p, miR-147-5p, miR-203b-5p, miR-6402, miR-107-5p, miR-485-3p, miR-1185-2-3p, miR-27a-3p, miR-203-3p, miR-320c, miR-216b-3p, miR-499b-5p, miR-136-5p, miR-1291, miR-9-3p, miR-6516-3p, miR-6395, miR-335-3p, miR-3065-5p, miR-432-3p, miR-432-3p, miR-345-5p, miR-758-3p, miR-127-3p, let-7c-3p, miR-3955-3p, miR-124-5p, miR-103a-2-5p, miR-582, novel\_115, miR-224-5p, miR-7-5p, miR-320b, miR-182-5p, miR-2411-3p, miR-1185-3p, miR-216a-3p, miR-9788-3p, miR-500-5p, miR-548w, miR-3955-5p, miR-27a-3p, miR-2426, miR-16-1-3p, miR-1388-5p, miR-27b-3p, miR-2284x, miR-7b-5p, miR-181a-5p, miR-758-3p, novel\_23

TPRKB ENSOARGO(TP53RK b  
 C3orf67 ENSOARGO(chromoso

|       |                    |                                                                                                                                                                                                                                                                                                                                                                                                                                                                                                                                                                                                                                                                                                                                                                                                                                                                                                                                                                                                                                                                                                                                                                                                                                                                                                                                                                                                                                                                                                                                                                                                                                                                                                                                                                                                                                                                    |
|-------|--------------------|--------------------------------------------------------------------------------------------------------------------------------------------------------------------------------------------------------------------------------------------------------------------------------------------------------------------------------------------------------------------------------------------------------------------------------------------------------------------------------------------------------------------------------------------------------------------------------------------------------------------------------------------------------------------------------------------------------------------------------------------------------------------------------------------------------------------------------------------------------------------------------------------------------------------------------------------------------------------------------------------------------------------------------------------------------------------------------------------------------------------------------------------------------------------------------------------------------------------------------------------------------------------------------------------------------------------------------------------------------------------------------------------------------------------------------------------------------------------------------------------------------------------------------------------------------------------------------------------------------------------------------------------------------------------------------------------------------------------------------------------------------------------------------------------------------------------------------------------------------------------|
| FANK1 | ENSOARGO(fibronec) | <p>miR-320d, miR-466i-5p, miR-199a-5p, miR-3065-3p, miR-4429, novel_133, miR-2300b-3p, miR-7134-5p, miR-29d-3p, miR-322-5p, miR-15a-5p, miR-1224-5p, miR-505-3p, miR-212-5p, miR-664a, miR-487a-5p, miR-31-3p, miR-424-5p, miR-29b-3p, miR-665, miR-224-5p, miR-1306-5p, miR-4510, miR-3074-5p, miR-16-5p, miR-2474, miR-1248, miR-320a, miR-6130, miR-199a-5p, miR-324-5p, miR-15b-5p, miR-21-3p, miR-3065-3p, miR-182-5p, miR-199b-5p, miR-224-5p, miR-320b, miR-3141, miR-2957, miR-16b, miR-182-5p, miR-424-5p, miR-376b, miR-30b-3p, miR-29b, miR-16b, miR-497-5p, miR-744-5p, miR-30b-3p, miR-145a-5p, miR-134-3p, miR-147a, miR-421, novel_4, miR-1343-3p, miR-5010-3p, miR-145b, miR-26b-3p, miR-29a, miR-15a, miR-16a, miR-199b-5p, miR-29c-3p, miR-450b-3p, novel_94, miR-505-3p, miR-195a-5p, miR-3141, miR-199b-5p, miR-3591-3p, miR-378g, miR-29a-3p, miR-320c, miR-3074-5p</p> <p>miR-6130, miR-3957, miR-204-3p, miR-504-5p, miR-3957-5p, miR-2355-5p, miR-485-5p, miR-671-5p, miR-1827, miR-20b-5p, miR-488-3p, miR-17-5p, miR-487b-5p, miR-93-5p, miR-346, miR-93, miR-338-3p, miR-3184-5p, miR-4510, novel_42, miR-214, miR-664a, miR-486b-3p, miR-4492, miR-494-5p, miR-2433, miR-331-3p, miR-532-3p, novel_83, miR-106a, miR-431, miR-33b-3p, miR-2300b-3p, miR-2366, novel_133, miR-5703, miR-1271-3p, miR-486-3p, miR-20a, miR-495-5p, miR-466i-5p, miR-760-3p, miR-106a, miR-185-3p, miR-3082-5p, miR-25, miR-146b-3p, miR-378g, novel_68, miR-504, miR-361-3p, miR-129b-5p, miR-877-3p, miR-154a, miR-423-5p, miR-3956-3p, miR-2447, novel_60, miR-4726-5p, miR-2284q, miR-20a-5p, miR-133a-5p, miR-2285n, miR-502-5p, miR-185-5p, miR-134-3p, miR-1298-3p, miR-20b, miR-149-5p, miR-455-3p, novel_78, miR-744-5p, miR-484, miR-4532, miR-106a-5p, miR-378a-5p, miR-214-3p, novel_115, miR-431-5p, miR-17-5p, miR-106b-5p, miR-106a-5p</p> |
| FDXR  | ENSOARGO(ferredox) |                                                                                                                                                                                                                                                                                                                                                                                                                                                                                                                                                                                                                                                                                                                                                                                                                                                                                                                                                                                                                                                                                                                                                                                                                                                                                                                                                                                                                                                                                                                                                                                                                                                                                                                                                                                                                                                                    |

miR-361-3p, miR-147-3p, novel\_94, miR-877-3p, miR-664b, miR-3064-5p, miR-10b, miR-452-3p, miR-499b-5p, miR-7977, miR-454-5p, miR-2285n, miR-2285y, miR-769-5p, miR-107-5p, miR-4726-5p, novel\_60, miR-4454, miR-212-3p, miR-219a-5p, miR-362-5p, miR-484, miR-296-5p, miR-143-5p, miR-4791, miR-30b-3p, miR-125b-2-3p, miR-544a, miR-3120-5p, miR-2300a-5p, miR-9788-3p, miR-500-5p, miR-2285e, miR-1306-5p, novel\_115, miR-2957, novel\_124, miR-3085-3p, miR-3955-3p, miR-424-5p, miR-2330-5p, miR-33a-5p, miR-30c-1-3p, miR-4532, miR-193a, miR-3187-3p, miR-758-3p, let-7g-3p, novel\_99, miR-221-5p, miR-660-5p, miR-496-3p, miR-3065-3p, miR-192-5p, miR-6130, novel\_32, miR-22-3p, miR-204-3p, miR-324-3p, miR-132-5p, miR-450b-3p, miR-6516-3p, miR-664a, miR-17-3p, miR-424-5p, miR-4510, miR-6134, novel\_133, miR-2300b-3p, miR-215-5p, miR-140-3p, miR-19b-3p, miR-378d, miR-548e-3p, miR-1b-3p, miR-383-5p, miR-15a-5p, miR-148b-3p, miR-196a-3p, miR-125b, miR-221-5p, miR-30b-3p, miR-299-3p, miR-21-3p, miR-130a-5p, miR-146a-5p, miR-2387, miR-378b, miR-18a-3p, miR-1291, miR-450b-3p, miR-19a-3p, miR-107, miR-9851-3p, miR-195a-5p, miR-6395, miR-670-3p, miR-15a, miR-16a, miR-128-1-5p, miR-22-5p, miR-17-3p, miR-211, miR-2428, miR-873a-5p, miR-374b-3p, miR-145a-5p, miR-30b-3p, miR-1260b, miR-455-5p, miR-26b-3p, miR-2285g, miR-544b, miR-103, miR-2355-3p, miR-455-5p, miR-660, miR-125a-5p, miR-1343-5p, miR-130b-5p, miR-2483-5p, miR-363-5p, miR-345-5p, miR-488-3p, miR-503-3p, miR-362-5p, miR-3154, let-7g-3p, miR-7144-5p, miR-23a-5p, miR-485-5p, miR-370-3p, miR-615-5p, miR-215-5p, miR-769, miR-365a-3p, miR-324-5p, miR-154b-5p, miR-2332, miR-331-3p, miR-204-5p, miR-486b-3p, miR-6128, miR-103b, miR-500b-5p, miR-145-3p, miR-345-3p, miR-615-3p, miR-7134-5p, miR-496, let-7a-2-3p, miR-483-3p, miR-214-5p, miR-1260a, miR-30c-2-3p, miR-330a, miR-

novel\_63, miR-125b-5p, miR-6740-5p, novel\_9, miR-134-5p, miR-125a, miR-331-5p, miR-300-3p, miR-200a-5p, miR-376c-5p, miR-329a, miR-3064-5p, miR-450b-5p, miR-148b-5p, let-7g, miR-200a, miR-29a-5p, miR-205-5p, miR-30f, let-7f-5p, miR-1a-2-5p, novel\_96, novel\_127, miR-152-3p, miR-412, novel\_79, miR-431, miR-505-5p, miR-450a-1-3p, miR-134-5p, miR-486-5p, novel\_121, miR-1290, miR-1343-5p, miR-330-5p, miR-1a-1-5p, miR-1839-3p, miR-193b-3p, miR-374c-5p, miR-2285m, miR-2284w, miR-4324, miR-28c, miR-206, miR-3074-5p, miR-374c-3p, miR-411b-3p, novel\_69, miR-677, miR-669, miR-320c, miR-181b-3p, miR-376b-5p, miR-148a-3p, miR-1306, miR-150-5p, miR-3591-3p, miR-412-3p, miR-146b-5p, let-7e-5p, miR-380-5p, miR-6240, miR-668-3p, miR-2285r, let-7a-2-3p, miR-377-3p, miR-146a, miR-2285v, miR-2411-3p, novel\_51, miR-193a-3p, miR-3955-5p, miR-339-5p, miR-412-5p, miR-3431, miR-134-3p, novel\_116, miR-194-3p, miR-149-5p, miR-19b-2-5p, miR-1843b-5p, miR-22-3p, miR-450c-3p, let-7b, miR-3074-5p, miR-214, miR-6525, miR-142a-5p, miR-346, let-7f, miR-2285j, miR-151-3p, miR-129-5p, miR-1468-5p, miR-216b-3p, miR-296-3p, miR-552-3p, miR-377-3p, miR-10a, let-7i-5p, miR-2285c, miR-450a-1-3p, miR-129b-3p, miR-339b, miR-1827, miR-186-5p, miR-503-5p, miR-195a-3p, miR-664b-3p, miR-376a-5p, miR-181b-1-3p, miR-143-3p, miR-2285p, novel\_17, miR-618, miR-210-5p, miR-219b-5p, miR-324-3p, miR-92a-1-5p, miR-345-3p, miR-98-5p, let-7k, miR-18a-3p, miR-212-5p, miR-1961, miR-33b-3p, miR-133a-3p, miR-2447, miR-3956-3p, miR-877-3p, miR-1285-5p, novel\_82, miR-2440, miR-301a-5p, miR-499a-5p, miR-628-3p, miR-490-5p, miR-139-5p, miR-2285u, miR-378g, miR-2483-3p, miR-378j, miR-96-5p, miR-668-5p, miR-335-3p, miR-1983, miR-124a, miR-1388-3p, miR-101b-3p, miR-744-3p, miR-8485, miR-1b-5p, miR-100a-3p, miR-131-5p, miR-323b-3p, miR-505, miR-182-novel\_116, miR-6535, miR-324-5p, miR-532-3p, miR-4443, miR-6525, miR-193b-3p, miR-193b-3p, miR-214, miR-218-1-3p, miR-874-5p, miR-193a-3p, miR-1827, miR-2284x, miR-214-3p

ASB9

ENSOARGO( ankyrin

GPA33

ENSOARGO( glycopro

miR-202-5p, miR-2284m, novel\_17, miR-122-3p, miR-422a, miR-181b-1-3p, miR-130a-5p, miR-216c-5p, miR-142-3p, miR-148a-5p, let-7a-3p, miR-378i, miR-1246, miR-362-3p, miR-124-3p, miR-188-3p, miR-378a-3p, miR-148b-3p, miR-340-5p, miR-30d-3p, novel\_74, miR-487b-5p, miR-17-3p, miR-155-5p, miR-500, miR-15b-3p, miR-2285j, miR-30e-3p, miR-30a-3p, miR-324-3p, miR-29b-2-5p, miR-378c, miR-3184-3p, miR-543-3p, miR-625-5p, miR-186-5p, novel\_99, let-7f-1-3p, miR-2285c, miR-500a-3p, miR-544-3p, miR-139-5p, miR-155-5p, miR-378a-3p, miR-30c-1-3p, miR-32-3p, miR-182-5p, miR-552-3p, miR-1185-5p, miR-487b-5p, miR-153-3p, miR-323b-3p, miR-362-3p, miR-182-5p, miR-30c-1-3p, miR-378d, miR-193a, miR-1b-5p, miR-124a, miR-101b-3p, miR-382-3p, miR-2284b, miR-378c, miR-1388-5p, miR-362-3p, miR-2426, miR-450b-5p, miR-544a, miR-101a-5p, miR-16-2-3p, miR-101c, miR-378b, miR-329-3p, miR-143-5p, miR-323b, miR-153, miR-216a-3p, miR-148b-5p, miR-2285e, miR-105-1, miR-330-3p, miR-222-5p, miR-27a-3p, miR-181b-2-3p, miR-3958-3p, miR-499a-5p, miR-374a-3p, miR-3964, miR-2284q, miR-218-5p, miR-101-3p, miR-877-3p, novel\_111, miR-32-3p, novel\_60, miR-3059-5p, miR-885-5p, miR-3956-3p, miR-6527, miR-452-5p, miR-194b-5p, miR-2284j, miR-668-5p, miR-136-5p, miR-140-5p, miR-381-3p, miR-378e, miR-3596, miR-3082-5p, miR-2483-3p, miR-144-5p, miR-203-3p, miR-27a-3p, miR-454-5p, miR-139-5p, miR-2319b, miR-499b-5p, miR-450a-2-3p, miR-17-3p, miR-1a-2-5p, miR-152-3p, miR-30c-2-3p, miR-450b-5p, miR-29a-5p, miR-2284y, miR-2284a, miR-3956-5p, miR-30a-3p, miR-2385-3p, miR-29b-2-5p, miR-105-2, miR-155-5p, miR-128-3p, let-7a-2-3p, miR-1290, miR-29d-3p, miR-378h, novel\_121, miR-374b-3p, miR-29b-3p, miR-1-5p, miR-2284k, miR-5100, miR-135a-5p, miR-374a-3p, miR-365a-5p, miR-378c, miR-145-3p, miR-1306-5p, miR-2284v, miR-144-5p, miR-329a, let-7a-3p, miR-200a-5p, miR-871, novel\_99, miR-3154, miR-411, miR-3957, miR-15b-5p, miR-374c-3p, miR-377-3p, miR-3957-5p, miR-221-5p, miR-424-5p, miR-6516-3p, miR-324-3p, miR-181c-5p, miR-16-5p, miR-411-3p, miR-1343-5p, miR-2904, miR-5703, novel\_133, miR-2366, miR-2300b-3p, miR-1246, miR-322-5p, miR-15a-5p, miR-107, miR-221-5p, miR-181b-5p, miR-130a-5p, miR-2385-3p, miR-4286, miR-183-5p, miR-1983, miR-195a-5p, miR-412-3p, miR-107, miR-129b-5p, miR-378j, miR-3082-5p, novel\_69, miR-374c-3p, miR-203b-5p, miR-3968, miR-379-3p, miR-16a, miR-382-5p, miR-15a, novel\_27, miR-495-3p, miR-181d-5p, miR-101c, miR-26a-2-3p, miR-497-5p, miR-16b, miR-3071-5p, miR-374b-3p, miR-7b-5p, miR-181a-5p, novel\_116, miR-2355-3p, miR-103, miR-412-5p, miR-5010-3p, miR-103a-3p, miR-1343-5p, miR-16b, miR-7-5p, miR-377-3p, miR-8485, miR-382-3p, miR-424-5p

MOB1B

ENSOARGO(MOB kina

GORAB

ENSOARGO(golgin,



miR-148a-3p, miR-2387, miR-150-5p, miR-18a-3p, miR-450b-3p, miR-19a-3p, miR-2319a, miR-378f, miR-320b, miR-146b-3p, miR-670-3p, miR-4324, miR-142b, miR-128-1-5p, miR-206, miR-147-5p, miR-24-3p, miR-301b-3p, miR-199b-5p, miR-7b-5p, miR-2113, miR-1434-3p, miR-450c-3p, novel\_23, miR-380-3p, miR-26a-2-3p, miR-27b-3p, miR-7862, miR-31-5p, miR-130a-3p, miR-3535, miR-2285g, miR-3431, miR-149-5p, miR-2355-3p, miR-7-5p, miR-377-3p, miR-125a-5p, miR-654-3p, miR-345-5p, miR-331-5p, miR-345-5p, miR-190a-3p, miR-7144-5p, miR-671-5p, miR-1814c, miR-874-3p, miR-370-3p, miR-2355-5p, miR-125a, miR-374c-3p, miR-300-3p, miR-199a-5p, miR-551b-3p, miR-410-5p, miR-2284k, miR-2433, miR-5100, miR-331-3p, miR-26c, miR-125b-5p, miR-331-5p, miR-134-5p, novel\_42, miR-378c, miR-134, miR-1290, miR-885-3p, miR-429-3p, miR-423-3p, miR-2411-5p, miR-378h, miR-582-3p, miR-134-5p, miR-450a-1-3p, miR-214-5p, miR-129-1-3p, miR-205-5p, miR-200c, miR-30c-2-3p, miR-200c-3p, novel\_127, miR-152-3p, miR-3529-3p, miR-495-5p, miR-1, miR-450b-5p, novel\_39, miR-2284y, miR-199a-5p, miR-450c-5p, miR-490-3p, miR-361-3p, miR-199b-5p, miR-409-5p, miR-668-5p, miR-877-3p, miR-378e, miR-203-3p, miR-27a-3p, miR-4443, miR-450a-5p, miR-3059-5p, miR-541-3p, miR-2284j, miR-361-3p, miR-296-5p, miR-484, miR-378b, miR-6529a, miR-541, miR-4791, miR-1a-3p, miR-758-3p, miR-125b-2-3p, miR-378c, miR-1388-5p, miR-544a, miR-3120-5p, miR-2300a-5p, miR-27a-3p, miR-2459, miR-2285e, miR-421, novel\_103, novel\_19, miR-1185-5p, miR-3955-3p, miR-130b-3p, miR-199b-5p, miR-214-3p, miR-2330-5p, let-7c-3p, miR-378d, miR-30c-1-3p, miR-758-3p, miR-2310, miR-21a-3p, miR-450a-1-3p, miR-2285c, let-7g-3p, miR-345-5p, miR-885-3p, miR-582-5p, miR-30c-1-3p, miR-545-3p, miR-221-5p, miR-378a-3p, miR-21-3p, novel\_107, miR-216b-3p, miR-522-5p, miR-377-3p, miR-544-3p, miR-301a-3p, miR-582-5p, miR-6240, miR-1839-3p, miR-2330-5p, miR-424-5p, miR-130b-5p, miR-30c-1-3p, miR-16b, miR-330-3p, miR-326, miR-503-5p, miR-214-3p, miR-542-5p, miR-3955-3p, miR-25-5p, miR-491-5p, miR-378a-5p, miR-330-3p, miR-149-5p, miR-503-5p, miR-496-5p, miR-30b-3p, miR-450c-3p, miR-541, miR-484, miR-497-5p, miR-2426, miR-450b-5p, miR-16b, miR-30b-3p, miR-542-5p, miR-3957-3p, miR-1839-3p, miR-3956-3p, miR-541-3p, novel\_60, miR-423-5p, miR-326-3p, miR-24-3p, miR-211, miR-33a-3p, miR-16a, miR-6529b, miR-615, miR-15a, miR-2284q, miR-128-1-5p, miR-211-5p, miR-2285u, miR-10b, novel\_68, miR-6535, miR-378j, miR-195a-5p, miR-504, miR-181a-2-3p, miR-2887, miR-29b-2-5p, miR-503-5p, miR-2285b, miR-450b-5p, miR-30c-2-3p, miR-542-5p, miR-200c, miR-2285af, novel\_96, miR-760-3p, miR-200c-3p, miR-450a-1-3p, novel\_83, miR-6516-5p, miR-200b, miR-15a-5p, miR-322-5p, miR-330-5p, miR-5703, miR-218-2-3p, miR-2904, miR-215-5p, miR-193b-5p, miR-615-3p, miR-133a-3p, miR-200b-3p, miR-214, miR-16-5p, miR-4510, miR-3184-5p, miR-346, miR-665, miR-29b-2-5p, miR-331-3p, miR-2285j, miR-2433, miR-204-5p, miR-28-5p, miR-130b-5p, miR-708-5p, miR-424-5p, miR-450b-3p, miR-215-5p, miR-615-5p, miR-504-5p, miR-30c-1-3p, miR-15b-5p, miR-6130, miR-6516, miR-192-5p, miR-450a-1-3p, miR-1827, miR-671-5p, miR-625-5p

UBA7 ENSOARGO(ubiquitin)

CA11 ENSOARGO(carbonic)

|       |                   |                                                                                                                                                                                                                                                                                                                                                                                                                                                                                                                                                                                                                                                                                                                                                                                                        |
|-------|-------------------|--------------------------------------------------------------------------------------------------------------------------------------------------------------------------------------------------------------------------------------------------------------------------------------------------------------------------------------------------------------------------------------------------------------------------------------------------------------------------------------------------------------------------------------------------------------------------------------------------------------------------------------------------------------------------------------------------------------------------------------------------------------------------------------------------------|
|       |                   | miR-10a-5p, miR-128-3p, miR-330-5p, miR-501-3p, miR-18b-5p, novel_79, miR-6517, miR-2285ad, miR-152-3p, miR-543-5p, novel_127, miR-200a-3p, miR-339a, miR-125a-3p, miR-1260a, miR-3065-3p, miR-450b-5p, miR-345-5p, miR-18a, miR-34c-5p, miR-615-5p, miR-141-3p, miR-370-3p, miR-874-3p, miR-3969, miR-331-3p, miR-365a-5p, miR-1197-3p, miR-1260b, miR-1260b, miR-374b-3p, miR-22-3p, miR-542-3p, miR-2355-3p, miR-134-3p, miR-412-5p, miR-339-5p, miR-378a-5p, miR-365b-5p, miR-3141, miR-345-5p, miR-1291, miR-18a-3p, miR-216a-3p, miR-3141, miR-18b, miR-148a-3p, miR-6535, miR-34b, miR-146b-3p, miR-10a-5p, miR-320b, miR-3074-5p, miR-6123, miR-128-1-5p, miR-34c, miR-6402, miR-2428, miR-326-3p, miR-449a, miR-371b-3p, miR-135a-2-3p, miR-378d, miR-34a-5p, miR-188-3p, miR-                |
| MMP24 | ENSOARGO(matrix m | 1193, miR-140-3p, miR-2408, miR-1246, miR-532-3p, miR-148b-3p, miR-18a-3p, miR-34b-5p, miR-221-5p, miR-760-3p, miR-185-3p, miR-324-3p, miR-345-5p, miR-339b, miR-18a-5p, miR-21a-3p, miR-877-5p, novel_32, miR-22-3p, miR-10a, miR-552-3p, miR-182-5p, miR-3065-3p, miR-221-5p, miR-504-5p, miR-4492, miR-664a, miR-3184-5p, miR-346, miR-10b-5p, miR-214, miR-2330-3p, miR-665-5p, miR-3074-5p, miR-145a-3p, miR-539-5p, miR-3120-5p, miR-101a-5p, miR-501-3p, miR-10b, miR-541, miR-301b-5p, miR-296-5p, miR-2459, miR-9788-3p, miR-216a-3p, miR-1343-3p, miR-214-3p, miR-182-5p, miR-326, miR-193a, miR-1388-3p, miR-504, miR-361-3p, miR-500-3p, miR-489, miR-378g, miR-10b, miR-490-5p, miR-301a-5p, miR-2285y, miR-2440, miR-502-3p, miR-423-5p, miR-361-3p, miR-877-3p, miR-1296-5p, miR-541-3p |
| IDH2  | ENSOARGO(isocitra | miR-187-3p, miR-3064-5p, miR-3064-5p, miR-6535, miR-486-3p, miR-331-3p, novel_19, miR-3085-3p, miR-486b-3p, miR-744-5p                                                                                                                                                                                                                                                                                                                                                                                                                                                                                                                                                                                                                                                                                 |
| CPNE3 | ENSOARGO(copine I | miR-10b-3p, miR-30b-3p, miR-8485, miR-186-5p, miR-3154                                                                                                                                                                                                                                                                                                                                                                                                                                                                                                                                                                                                                                                                                                                                                 |
| SSBP4 | ENSOARGO(single s | miR-4492, miR-324-5p, miR-30b-3p, miR-361-3p, miR-30b-3p, novel_51                                                                                                                                                                                                                                                                                                                                                                                                                                                                                                                                                                                                                                                                                                                                     |

miR-193a-3p, miR-377-3p, miR-2285r, miR-539-3p, miR-628-5p, miR-2284ab, miR-27b-3p, miR-1285, miR-223-3p, miR-145a-5p, let-7g-5p, miR-2284d, miR-2285g, miR-544b, miR-194-3p, novel\_116, miR-130a-3p, let-7i, miR-323c, miR-301b-3p, miR-326-3p, miR-219b-3p, miR-2285x, novel\_101, miR-193b-3p, miR-6395, let-7e-5p, miR-2285ab, miR-216a-3p, miR-376b-3p, miR-150-5p, miR-670-3p, miR-2404, miR-216b-3p, novel\_68, let-7f-5p, miR-200c-3p, miR-200c, miR-376b-3p, miR-2285af, let-7c-5p, miR-30f, miR-148b-5p, miR-2284a, let-7g, miR-29a-5p, miR-4286, miR-30a-3p, miR-582-3p, let-7d, miR-200b-3p, miR-30c, miR-128-3p, miR-30a-5p, miR-330-5p, miR-23b-5p, miR-429-3p, miR-2285ad, novel\_9, miR-374b-3p, miR-410-3p, miR-2332, miR-2284k, miR-409-3p, miR-3969, miR-6740-5p, miR-331-3p, miR-374a-3p, miR-2284v, miR-3607-3p, miR-329a, miR-30e-5p, miR-200a-5p, miR-365a-3p, miR-300-3p, miR-324-5p, miR-215-5p, miR-2285aa, miR-130b-3p, miR-3955-3p, let-7e, miR-326, miR-199a-3p, miR-505, miR-362-3p, miR-758-3p, let-7a-5p, miR-652-5p, miR-376b, miR-544a, miR-362-3p, miR-329-3p, miR-125b-2-3p, miR-758-3p, miR-376b-3p, miR-2285e, miR-421, miR-148b-5p, miR-216a-3p, novel\_78, miR-145b, miR-27a-3p, miR-2284q, miR-374a-3p, miR-30b-5p, miR-2285n, miR-2285y, miR-154a, miR-1285-5p, miR-2284j, miR-6527, miR-2285f, miR-668-5p, miR-376a-3p, miR-335-3p, miR-2483-3p, miR-376d, miR-27a-3p, let-7d-5p, miR-2285u, miR-760-3p, miR-98-5p, let-7k, miR-30d, miR-221-5p, novel\_17, miR-196a-3p, miR-30b, miR-216a-5p, miR-216c-5p, miR-183-5p, miR-33b-3p, miR-148a-5p, miR-193b-5p, miR-362-3p, miR-1961, miR-215-5p, miR-30c-5p, miR-200b, miR-383-5p, miR-487a-3p, miR-7859, miR-328-3p, miR-199a-3p, miR-548e-3p, miR-30d-3p, miR-485-3p, miR-664a, novel\_74, miR-454-3p, miR-487a-5p, let-7f, miR-2285i, miR-3604, miR-664a-5p, miR-30a-3p, let-7h-5p, miR-145a-5p, miR-582-5p, miR-3963, miR-411, miR-199b-5p, miR-199a-5p, miR-154b-5p, miR-582-5p, miR-25, miR-193b-3p, miR-25-3p, miR-7-1-3p, miR-32-5p, miR-20a-3p, miR-708-5p, miR-28-5p, miR-134-5p, miR-499a-5p, novel\_74, miR-92a-3p, novel\_1, miR-107-5p, miR-199b-5p, miR-193b-3p, miR-425-5p, miR-212-3p, miR-363-3p, miR-21b, miR-361-5p, miR-188-5p, miR-16-1-3p, miR-3071-5p, miR-217-5p, miR-873a-5p, miR-126-3p, miR-1434-3p, miR-134, miR-134-5p, miR-2284h-5p, miR-539-5p, miR-6517, miR-199b-5p, miR-193a-3p, miR-92a-3p, miR-103a-2-5p, miR-124-5p, miR-32, miR-217, miR-199a-5p, miR-8485, miR-29a-5p, miR-2310, miR-92b-3p, miR-450b-5p, miR-664b-3p, miR-382

PIGA ENSOARGO( phosphat

TCFL5 ENSOARGO( transcri

novel\_127, miR-21-3p, let-7k, miR-34b-5p, let-7f-5p, miR-98-5p, let-7c-5p, novel\_17, miR-490-3p, miR-380-3p, miR-2411, let-7g, miR-29a-5p, miR-183-5p, miR-34a-5p, let-7a-2-3p, let-7d, miR-140-3p, miR-1197-5p, miR-1193, miR-2904, miR-29d-3p, miR-215-5p, miR-1961, miR-486-5p, miR-2284h-5p, miR-582-3p, miR-2411-5p, miR-1271-5p, miR-95-3p, miR-1224-5p, miR-18a-3p, miR-190a-5p, miR-664a, miR-767-5p, miR-3969, miR-331-3p, miR-151-3p, let-7f, miR-29b-3p, let-7b-5p, miR-122-5p, miR-1271, miR-3074-5p, let-7b, miR-23a-5p, miR-625-5p, let-7g-3p, let-7g-3p, miR-767, miR-301, miR-21a-3p, miR-488-3p, let-7i-5p, miR-204-3p, miR-365a-3p, miR-27a-5p, miR-34c-5p, miR-192-5p, miR-215-5p, miR-370-3p, miR-216b-3p, miR-874-3p, let-7e, miR-1185-5p, miR-190a, miR-758-3p, let-7a-2-3p, miR-3187-3p, let-7a-5p, miR-27b-3p, miR-2889, miR-3120-5p, miR-26a-2-3p, miR-219a-1-3p, miR-380-3p, miR-29b, miR-758-3p, miR-145a-5p, miR-1285, miR-1434-3p, miR-147a, miR-1298-3p, let-7g-5p, miR-27a-3p, miR-145b, miR-133b-5p, miR-151a-3p, miR-1343-3p, miR-29a, let-7i, miR-34c, miR-7705, miR-2428, miR-449a, miR-24-3p, miR-29c-3p, miR-3956-3p, novel\_60, miR-3059-5p, miR-135a-2-3p, miR-2447, miR-6516-3p, let-7e-5p, miR-96-5p, miR-378j, miR-378b, miR-18a-3p, miR-27a-3p, let-7d-5p, miR-6535, miR-411b-3p, miR-34b, miR-29a-3p, miR-3120-3p, miR-320b, miR-452-3p, miR-10b, miR-3074-5p  
 miR-326, miR-3141, novel\_19, miR-3085-3p, miR-25-5p, miR-1343-5p, miR-2330-5p, miR-378d, miR-30c-1-3p, miR-4532, miR-503-3p, miR-378b, miR-296-5p, miR-2284r, miR-1843b-5p, miR-378c, miR-138, miR-3432b, miR-2426, miR-4508, miR-744-5p, miR-340-3p, novel\_4, miR-377-5p, miR-147a, miR-1247-3p, miR-28c, miR-2447, miR-423-5p, miR-326-3p, miR-2428, miR-3141, miR-1291, miR-2319a, miR-378f, miR-3064-5p, miR-378b, miR-378e, miR-210-5p, miR-30c-2-3p, miR-185-3p, miR-422a, miR-92a-1-5p, miR-2898, miR-760-3p, miR-3064-5p, miR-28b, miR-377-5p, miR-378i, miR-3578, miR-1343-5p, miR-378a-3p, miR-330-5p, miR-378h, miR-2433, miR-331-3p, miR-664a-5p, miR-138-5p, miR-664a, miR-4492, miR-378c, miR-3184-5p, miR-378c, miR-6134, miR-378a-3p, miR-30c-1-3p, miR-27a-5p, miR-204-3p, miR-877-5p  
 miR-361-3p, miR-539-5p, miR-361-5p, miR-9851-3p, miR-582-3p, miR-3074-1-3p

UNC13B ENSOARGO(unc-13 h

REEP6 ENSOARGO( receptor

C2orf78 ENSOARGO( chromoso

miR-6402, miR-33a-3p, miR-361-3p, novel\_111, miR-2428, miR-32-3p, miR-3059-5p, miR-212-3p, miR-2285f, miR-2285x, miR-412-3p, miR-379-5p, miR-1983, miR-376b-5p, miR-2285ab, miR-148a-3p, miR-1306, miR-378j, miR-129b-5p, miR-18a-3p, miR-2404, miR-411b-3p, miR-203-3p, miR-144-3p, miR-3074-5p, miR-2285u, miR-503-5p, miR-1306-5p, miR-105-5p, miR-190a, novel\_19, miR-432-3p, miR-432-3p, miR-1388-3p, miR-130b-5p, miR-382, miR-376b, miR-628-5p, miR-2426, miR-101a-5p, miR-1839-5p, miR-188-5p, miR-3120-5p, miR-143-5p, miR-2285g, miR-412-5p, miR-503-5p, miR-2285e, miR-105-1, miR-339-5p, miR-190a-5p, miR-487a-5p, miR-130b-5p, miR-144, miR-100-3p, miR-3074-5p, miR-193a-5p, miR-2312, let-7g-3p, miR-339b, miR-7144-5p, miR-23a-5p, miR-376c-5p, miR-2285c, miR-376c-5p, miR-32-3p, miR-296-3p, miR-466i-5p, miR-127-5p, miR-191-3p, novel\_127, miR-152-3p, miR-339a, miR-503-5p, miR-4286, miR-345-3p, miR-181a-2-3p, miR-105-2, miR-23b-5p, miR-1197-5p, miR-148b-3p, miR-18a-3p, miR-7641, novel\_79  
 miR-654-3p, miR-296-3p, miR-6240, miR-380-5p, miR-466f-3p, miR-193a-3p, miR-452-5p, miR-296-3p, miR-224-5p, miR-106a-5p, miR-17-5p, miR-330-3p, miR-2284d, miR-412-5p, miR-2355-3p, miR-20b, miR-133b-5p, miR-1260b, miR-21-5p, miR-380-3p, miR-16b, miR-2284x, miR-7862, miR-497-5p, miR-873a-5p, miR-3071-5p, miR-450c-3p, miR-323c, miR-199b-5p, miR-1a-1-5p, miR-135a-2-3p, miR-495-3p, miR-758-5p, miR-1193, miR-2285x, miR-193b-3p, miR-206, miR-199c, miR-421-5p, miR-625-3p, miR-203b-5p, miR-133a-5p, miR-6402, miR-28c, miR-142b, miR-20a-5p, miR-15a, novel\_87, miR-33a-3p, miR-382-5p, miR-485-3p, miR-16a, miR-2404, miR-320c, miR-26b-5p, miR-320b, miR-450b-3p, miR-195a-5p, miR-18b, miR-21c, miR-18a-3p, miR-216a-3p, miR-380-5p, miR-28b, miR-2285b, miR-199a-5p, miR-200a, miR-1957a, miR-127-5p, miR-1a-2-5p, miR-200c-3p, novel\_127, miR-664-3p, miR-200c, miR-1260a, miR-2285af, miR-6516-5p, miR-1271-5p, miR-322-5p, miR-450a-1-3p, miR-545-5p, miR-429-3p, miR-18b-5p, miR-200b-3p, miR-128-3p, miR-3578, miR-30a-5p, miR-1260b, miR-93, miR-16-5p, miR-370-5p, miR-410-5p, miR-34c-3p, miR-2284k, miR-1-5p, miR-6740-5p, miR-769, miR-331-5p, miR-300-3p, miR-2284n, miR-376c-3p, miR-199a-5p, miR-3068-3p, miR-487a-3p, miR-329b, miR-20b-5p, miR-7144-5p, novel\_48, miR-2448-3p, miR-30e-5p, miR-488-3p, miR-17-5p, miR-18a, miR-320a, miR-362-5p, miR-93-5p, miR-491-3p, miR-1b-5p, miR-8485, miR-3187-3p, miR-424-5p, miR-106a-5p, miR-124a, miR-744-3p, let-7c-3p, miR-214-3p, miR-199b-5p, miR-320b, miR-199a-3p, miR-16b, miR-106b-5p, miR-539-5p, miR-126a-5p, miR-421, miR-455-3p, miR-500-5p, miR-2300a-5p, miR-199b-3p, miR-330-3p, miR-548w, miR-299a-5p, miR-1839-5p, miR-16-2-3p, miR-7857, miR-361-3p, miR-362-5p, miR-9-3p, miR-3059-5p, miR-2284j, miR-452-5p, miR-3968, miR-490-5p, miR-769-5p, miR-371a-5p, miR-2285v, miR-2182-3p, miR-25, miR-

MSI1 ENSOARGO(musashi)

PHF6 ENSOARGO(PHD fing)

miR-21c, miR-135b-5p, miR-195a-5p, miR-6516-3p, miR-655-5p, miR-146b-3p, miR-29a-3p, miR-670-3p, miR-15a, miR-6402, miR-20a-5p, miR-16a, novel\_1, miR-502b, miR-342-3p, miR-371b-3p, miR-873a-5p, miR-181a-5p, miR-29b, miR-138, miR-30b-3p, miR-21-5p, miR-1260b, miR-133b-5p, miR-2285g, miR-432-5p, miR-185-5p, miR-20b, miR-106a-5p, miR-17-5p, miR-124-5p, miR-125a-5p, miR-466f-3p, miR-130b-5p, miR-2483-5p, miR-539-3p, miR-345-5p, miR-381-3p, miR-3154, miR-17-5p, miR-10a-3p, miR-3074-1-3p, miR-23a-5p, miR-370-3p, miR-141-3p, miR-3965, miR-324-5p, miR-29b-3p, miR-135a-1-3p, miR-3969, miR-135a-5p, miR-138-5p, miR-31-3p, miR-28-5p, miR-1306-5p, miR-6128, miR-93, miR-145-3p, miR-3578, miR-29d-3p, miR-501-3p, miR-300, miR-128-3p, miR-222, miR-7641, miR-483-3p, miR-1271-5p, miR-582-3p, miR-545-5p, miR-2285af, miR-1260a, miR-200c, miR-30c-2-3p, miR-181b-5p, miR-200c-3p, miR-1, miR-2478, miR-24-2-5p, miR-1957a, miR-3065-3p, miR-490-3p, miR-664b, miR-3064-5p, miR-7857-3p, miR-3082-5p, miR-371a-5p, miR-107-5p, miR-2285t, miR-181d-5p, miR-219a-5p, miR-452-5p, miR-502-3p, miR-154a, miR-296-5p, miR-484, miR-30b-3p, miR-125b-2-3p, miR-16-2-3p, miR-2284aa, novel\_4, miR-9788-3p, miR-216a-3p, miR-221-3p, miR-2285e, miR-342, miR-1306-5p, novel\_103, miR-362-3p, miR-2957, miR-3085-3p, miR-3955-3p, miR-424-5p, miR-106a-5p, miR-376b, miR-30c-1-3p, miR-27b-5p, miR-582-5p, miR-3065-3p, miR-139-5p, miR-204-3p, miR-222-3p, miR-324-3p, miR-655-3p, miR-487a-5p, miR-708-5p, miR-424-5p, miR-145a-3p, miR-1271, miR-206-3p, miR-6134, miR-1246, miR-362-3p, miR-2300b-3p, miR-2904, miR-188-3p, miR-1197-5p, miR-140-3p, miR-5703, miR-548e-3p, miR-485-3p, miR-487a-3p, miR-383-5p, miR-15a-5p, novel\_83, miR-532-3p, miR-374a-5p, miR-216a-5p, miR-125b, miR-106a, miR-30b-3p, miR-21-3p, miR-183-5p, miR-216c-5p, miR-20a, miR-2432, miR-1306, miR-216a-

miR-543-5p, miR-181b-5p, miR-450a-2-3p, miR-339a, miR-1271-3p, miR-199a-5p, miR-3065-3p, miR-28b, miR-4286, miR-128-3p, miR-29d-3p, miR-134, miR-345-3p, miR-214-5p, miR-1271-5p, miR-302a-5p, miR-28-5p, miR-486b-3p, miR-204-5p, miR-767-5p, miR-331-3p, miR-26c, miR-29b-3p, miR-3607-3p, miR-6128, miR-1306-5p, miR-7144-5p, miR-320a, miR-154b-5p, miR-199a-5p, miR-769, miR-34c-5p, miR-660, miR-125a-5p, miR-1343-5p, miR-197-5p, miR-330-3p, miR-503-5p, miR-345-5p, miR-363-5p, miR-744-5p, miR-7862, miR-29b, miR-30b-3p, miR-374b-3p, miR-145a-5p, miR-181a-5p, miR-185-5p, miR-503-5p, miR-665, miR-187-3p, miR-16a, miR-34c, miR-15a, miR-502-5p, miR-449a, miR-326-3p, miR-24-3p, miR-323c, miR-371b-3p, miR-211, miR-2285x, miR-542-5p, miR-135a-2-3p, miR-342-3p, miR-6395, miR-195a-5p, miR-7975, miR-9851-3p, miR-1291, miR-18a-3p, miR-2387, miR-670-3p, miR-29a-3p, miR-34b, miR-323a-5p, miR-320b, miR-21-3p, miR-34b-5p, miR-221-5p, miR-760-3p, miR-320d, miR-125b, miR-185-3p, miR-542-5p, miR-196a-3p, miR-125b-2-3p, miR-183-5p, miR-378d, miR-4429, miR-1197-5p, miR-5703, miR-124-3p, miR-2904, miR-362-3p, novel\_133, miR-222-5p, miR-148b-3p, miR-15a-5p, miR-3960, miR-708-5p, miR-424-5p, miR-664a, miR-320e, miR-324-3p, miR-1271, miR-204-3p, novel\_32, miR-323-5p, miR-3065-3p, miR-660-5p, miR-221-5p, miR-542-5p, miR-3085-3p, miR-362-3p, miR-326, miR-320b, miR-342, miR-4532, miR-33a-5p, miR-424-5p, miR-125b-2-3p, miR-30b-3p, miR-143-5p, miR-484, miR-296-5p, novel\_4, miR-2300a-5p, miR-409b, miR-4726-5p, miR-371a-5p, miR-769-5p, miR-181d-5p, miR-1296-5p, miR-541-3p, miR-199b-5p, miR-361-3p, miR-3082-5p, miR-7977, miR-499b-5p, miR-3064-5p, miR-152-3p, novel\_127, miR-29a-5p, miR-3064-5p, miR-885-3p, miR-23b-5p, miR-330-5p, miR-1343-5p, miR-3591-5p, miR-129-1-3p, miR-134-5p, miR-505-5p, miR-322-5p, novel\_79, miR-1224-5p, miR-

miR-2284d, miR-395b-5p, miR-339-5p, miR-66b, miR-16-1-3p, miR-380-3p, miR-2284ab, miR-16b, miR-7862, miR-4508, miR-497-5p, miR-7b-5p, miR-542-3p, miR-653, miR-345-5p, miR-493-5p, miR-382, miR-466f-3p, miR-7-5p, miR-2411-3p, miR-190a, miR-299b-3p, miR-6535, miR-10a-5p, miR-3120-3p, miR-195a-5p, miR-2387, miR-216a-3p, miR-3959-3p, miR-2284w, miR-135a-2-3p, novel\_120, miR-17-3p, novel\_1, miR-199c, miR-133a-5p, miR-15a, miR-33a-3p, miR-16a, miR-322-5p, miR-582-3p, miR-299a-3p, novel\_79, miR-10a-5p, miR-30c, miR-128-3p, miR-345-3p, miR-30a-5p, miR-1957a, miR-6536, miR-17-3p, miR-200a-3p, novel\_96, miR-125a-3p, miR-6119-5p, miR-339a, miR-30c-2-3p, miR-2284n, miR-503-3p, miR-141-3p, miR-370-3p, miR-345-5p, miR-1814c, novel\_48, miR-23b, miR-3154, miR-6128, miR-16-5p, miR-28-5p, miR-34c-3p, novel\_63, miR-331-3p, miR-216a-3p, miR-455-3p, miR-199b-3p, miR-409b, miR-222-5p, miR-299a-5p, miR-10b, miR-301b-5p, miR-143-5p, miR-541, miR-30c-1-3p, miR-2310, miR-8485, miR-101b-3p, miR-424-5p, miR-1388-3p, miR-652-5p, miR-23a-3p, let-7c-3p, miR-491-5p, novel\_103, miR-199a-3p, miR-16b, miR-29b-1-5p, miR-3082-5p, miR-499a-3p, miR-25, miR-139-5p, miR-541-5p, miR-668-5p, miR-136-5p, miR-504, miR-493-5p, miR-129b-5p, miR-381-3p, miR-8095, miR-3956-3p, miR-541-3p, novel\_60, miR-499a-5p, miR-3968, miR-2284q, miR-2440, miR-30b-5p, miR-218-5p, miR-301a-5p, miR-23c, miR-15a-5p, miR-23b-3p, miR-2284h-5p, miR-199a-3p, miR-548e-3p, miR-16-1-3p, miR-30c-5p, miR-140-3p, miR-142a-3p, miR-130a-5p, miR-376a-5p, miR-29b-1-5p, miR-421-5p, miR-380-3p, miR-143-3p, miR-2432, miR-2285w, miR-760-3p, miR-21-3p, miR-299-3p, miR-1277-5p, miR-30b, miR-345-3p, miR-3601, miR-139-5p, miR-6130, miR-10a, miR-499b-3p, miR-15b-5p, miR-548o-3p, miR-504-5p, miR-30c-1-3p, miR-30f, miR-2284b, miR-245-5p, miR-186-5p, miR-625-5p, miR-21a-3p, miR-134-5p, miR-421, miR-3535, miR-483-3p, miR-412, miR-31-5p, miR-128-3p, miR-412-3p, miR-140-3p, miR-296-5p, miR-484, miR-134, miR-4791, miR-490-3p, miR-450c-5p, miR-376a-5p, miR-483-3p, miR-378a-5p, miR-377-3p, miR-2285p, miR-377-3p, miR-2355-5p, miR-541-5p, miR-370-3p, miR-548o-3p, miR-3074-5p, miR-20a-3p, miR-6516-3p, miR-10b-3p, miR-1291, miR-216a-3p, miR-3154, miR-361-3p, miR-8095, miR-877-3p, novel\_42, miR-3074-5p, miR-656-5p, miR-134-5p, miR-4726-5p, miR-450a-5p, miR-664a

CISD2

ENSOARGO(CDGS)H

CIB1

ENSOARGO(calcium)



miR-345-3p, miR-146a-5p, miR-486-3p, miR-210-5p, miR-324-3p, miR-185-3p, miR-125b, miR-466i-5p, miR-34b-5p, miR-221-5p, miR-18a-3p, miR-30d-3p, miR-15a-5p, novel\_133, miR-193b-5p, miR-124-3p, miR-1197-5p, miR-133a-3p, miR-34a-5p, miR-4510, miR-30e-3p, miR-30a-3p, miR-665, miR-17-3p, miR-664a, miR-4492, miR-874-5p, miR-454-3p, miR-424-5p, miR-140-5p, miR-221-5p, miR-552-3p, miR-301a-3p, miR-193b-3p, miR-6130, miR-15b-5p, miR-133b-3p, miR-885-3p, miR-124a, miR-424-5p, miR-494-3p, miR-1306-5p, miR-326, miR-16b, miR-130b-3p, miR-146b, novel\_4, novel\_78, miR-27a-3p, miR-147a, miR-455-3p, miR-296-5p, miR-30b-3p, miR-361-3p, miR-877-3p, miR-2285n, miR-218-5p, miR-4726-5p, miR-450a-5p, miR-1843a-3p, miR-2319b, miR-378g, miR-27a-3p, miR-4443, miR-361-3p, novel\_94, miR-30a-3p, novel\_39, miR-450c-5p, miR-17-3p, novel\_127, miR-322-5p, miR-505-5p, miR-7134-5p, miR-1343-5p, miR-330-5p, miR-885-3p, miR-16-5p, miR-193a-5p, miR-133a-3p, miR-331-3p, miR-125b-5p, miR-486b-3p, miR-874-3p, miR-370-3p, miR-2355-5p, miR-125a, miR-34c-5p, miR-365a-3p, miR-3154, miR-7144-5p, miR-485-5p, miR-432-3p, let-7j, miR-146a, novel\_51, miR-1343-5p, miR-125a-5p, miR-193a-3p, miR-133b-5p, miR-130a-3p, miR-134-3p, miR-194-3p, miR-542-3p, miR-30b-3p, miR-16b, miR-497-5p, miR-27b-3p, miR-744-5p, miR-193b-3p, miR-17-3p, miR-371b-3p, miR-326-3p, miR-449a, miR-2428, miR-4324, miR-15a, miR-34c, miR-16a, miR-320b, miR-655-5p, miR-34b, miR-670-3p, miR-2387, miR-1306, miR-18a-3p, miR-1291, miR-146b-5p, miR-9851-3p, miR-195a-5p

miR-18a-3p, miR-548e-3p, miR-212-5p, miR-3600, miR-15a-5p, miR-23c, miR-7859, miR-23b-3p, miR-328-3p, miR-199a-3p, miR-2284h-5p, miR-2408, miR-1193, miR-1197-5p, miR-188-3p, miR-361-5p, miR-664-5p, miR-2285w, miR-181b-1-3p, miR-130a-5p, miR-143-3p, miR-2424, miR-210-5p, miR-542-5p, miR-2285p, miR-125b, miR-500a-5p, miR-3601, miR-2284m, miR-221-5p, miR-140-5p, miR-30c-1-3p, miR-221-5p, miR-2331-3p, miR-182-5p, miR-216b-3p, miR-6130, miR-323-5p, miR-6516, miR-301a-3p, miR-582-5p, miR-15b-5p, miR-22-3p, novel\_32, miR-339b, let-7g-3p, miR-1827, miR-582-5p, miR-4510, miR-145a-3p, miR-3074-5p, miR-2330-3p, miR-3958-5p, miR-222-3p, miR-29b-2-5p, miR-219b-3p, miR-664a, novel\_74, miR-130b-5p, miR-424-5p, miR-129-5p, miR-454-3p, miR-199b-3p, novel\_78, miR-2300a-5p, miR-181b-2-3p, miR-222-5p, miR-27a-3p, miR-1298-3p, miR-221-3p, miR-143-5p, miR-301b-5p, miR-6529a, miR-296-5p, miR-758-3p, miR-501-3p, miR-101a-5p, miR-21b, miR-424-5p, miR-1388-3p, miR-23a-3p, let-7c-3p, miR-30c-1-3p, miR-758-3p, miR-1306-5p, miR-199a-3p, miR-16b, miR-182-5p, miR-505, miR-2957, miR-3955-3p, miR-130b-3p, miR-542-5p, miR-2319b, miR-211-5p, miR-7689-3p, miR-2285u, miR-3082-5p, miR-2483-3p, miR-25, miR-454-5p, miR-500-3p, miR-27a-3p, miR-203-3p, miR-221, miR-140-5p, novel\_94, miR-877-3p, miR-9-3p, miR-3956-3p, novel\_60, miR-3059-5p, miR-9-5p, miR-2284j, miR-1296-5p, miR-219a-2-3p, miR-502-3p, miR-9-3p, miR-2440, novel\_82, miR-2285n, miR-301a-5p, miR-2284q, miR-222, novel\_79, miR-1224-5p, miR-7641, miR-6516-5p, miR-9-5p, miR-505-5p, miR-322-5p, miR-486-5p, miR-23b-5p, miR-501-3p, let-7a-2-3p, miR-128-3p, miR-29b-2-5p, miR-2478, miR-2285b, miR-125a-3p, miR-219-3p, miR-205-5p, miR-339a, miR-30c-2-3p, miR-450a-2-3p, miR-543-5p, miR-200a-3p, novel\_127, miR-107, miR-3068-3p, miR-125a, miR-141-3p, miR-2355-5p, miR-231-5p, miR-374c-3p, miR-223-5p, miR-381-3p, miR-411, miR-200a-5p, miR-7144-5p, miR-7975, miR-329-5p, novel\_68, miR-3064-5p, miR-1271, miR-7857-3p, miR-544-3p, miR-144-5p, miR-677, miR-101-3p, miR-33a-3p, miR-338-5p, miR-379-3p, miR-6119-3p, miR-199c, miR-2284q, miR-191-5p, miR-130b-5p, miR-2330-3p, miR-144-5p, miR-154a, miR-708-3p, miR-191, miR-125b-2-3p, miR-33b-3p, miR-544a, miR-411-3p, miR-1839-5p, miR-199b-3p, novel\_78, miR-330-3p, miR-548e-3p, miR-665, miR-7859, miR-302a-5p, miR-544b, miR-2285af, miR-330-3p, miR-760-3p, miR-3085-3p, miR-2484, miR-6240, miR-130b-5p, miR-329a-5p, miR-3064-5p, miR-1271-3p, miR-29a-5p

STOML2 ENSOARGO(stomatin)

SUB1 ENSOARGO(SUB1 hom)

miR-152-3p, novel\_96, miR-30c-2-3p, miR-380-5p, miR-2478, miR-28b, miR-450b-5p, miR-1271-3p, miR-3065-3p, novel\_39, miR-4286, miR-181a-2-3p, miR-29d-3p, miR-378h, miR-9-5p, miR-302a-5p, miR-505-5p, miR-214-5p, novel\_121, miR-450a-1-3p, miR-18b-5p, miR-29b-3p, miR-181c-3p, miR-145-3p, miR-378c, miR-193a-5p, miR-10b-3p, miR-485-5p, miR-23a-5p, miR-2448-3p, miR-18a, miR-3154, miR-769, miR-34c-5p, miR-376c-3p, miR-3068-3p, miR-2285aa, miR-378a-5p, miR-224-5p, miR-330-3p, miR-6240, miR-380-5p, miR-29b, miR-2284x, miR-188-5p, miR-1434-3p, miR-1285, miR-708-3p, miR-873a-5p, miR-450c-3p, miR-431-3p, miR-185-5p, miR-194-3p, miR-133b-5p, miR-377-5p, miR-26b-3p, miR-29a, miR-6119-3p, miR-199c, miR-656-5p, miR-203b-5p, miR-28c, miR-34c, miR-449a, miR-542-5p, miR-29c-3p, novel\_101, miR-495-3p, miR-378f, miR-18b, miR-148a-3p, miR-1306, miR-34b, miR-670-3p, miR-29a-3p, miR-323a-5p, miR-2404, miR-760-3p, miR-221-5p, miR-34b-5p, miR-542-5p, miR-618, miR-422a, miR-185-3p, miR-500a-5p, miR-324-3p, miR-377-5p, miR-376c-3p, miR-125b-2-3p, miR-34a-5p, miR-664-5p, miR-2300b-3p, miR-2408, miR-378i, miR-5703, miR-378a-3p, miR-188-3p, miR-124-3p, miR-148b-3p, miR-199a-3p, miR-151-5p, miR-3960, miR-664a, miR-450b-3p, miR-874-5p, miR-665, miR-224-5p, miR-769-5p, miR-3184-5p, miR-3184-3p, miR-4510, miR-145a-3p, miR-539-5p, miR-378c, miR-2330-3p, miR-18a-5p, let-7g-3p, miR-450a-1-3p, miR-129b-3p, miR-6130, miR-323-5p, miR-376e-3p, miR-151b, miR-378a-3p, miR-2331-3p, miR-221-5p, miR-30c-1-3p, miR-182-5p, miR-3065-3p, miR-25-5p, miR-491-5p, miR-542-5p, miR-1306-5p, miR-199a-3p, miR-182-5p, miR-505, miR-378d, miR-30c-1-3p, miR-124a, miR-378c, miR-2284r, miR-378b, miR-126a-5p, miR-9788-3p, miR-1343-3p, miR-199b-3p, miR-4726-5p, miR-769-5p, miR-371a-5p, miR-361-3p, miR-877-3p, miR-192-5p, miR-9-5p, miR-181a-3p, miR-140-5p, miR-378a, miR-

PIGO            ENSOARGO( phosphat

miR-301, miR-876-3p, miR-1248, miR-874-3p, miR-1271, miR-235b-5p, miR-25-3p, miR-133c, miR-134-5p, miR-16-5p, miR-193a-5p, miR-1197-3p, miR-1260b, miR-6517, miR-429-3p, miR-18b-5p, novel\_79, miR-758-5p, miR-322-5p, miR-450a-1-3p, miR-134-5p, miR-8117, novel\_127, miR-3064-5p, miR-92b-3p, miR-148b-5p, miR-450c-5p, miR-192-3p, novel\_39, miR-200a, miR-376b-5p, miR-410-5p, miR-378f, miR-2319a, miR-3074-5p, miR-3120-3p, miR-181b-3p, miR-677, novel\_87, miR-485-3p, miR-374c-5p, miR-19b-2-5p, miR-450c-3p, miR-16b, miR-497-5p, miR-103a-3p, miR-3955-5p, miR-339-5p, miR-3431, miR-134-3p, miR-377-3p, miR-2411-3p, miR-194a, miR-105-5p, miR-380-5p, miR-432-3p, miR-450a-1-3p, miR-411, miR-339b, miR-186-5p, miR-1827, miR-1895, miR-543-3p, miR-30c-1-3p, miR-32-5p, miR-552-3p, miR-377-3p, miR-582-5p, miR-15b-5p, miR-151-3p, miR-4492, miR-3074-5p, miR-3958-5p, miR-224-5p, miR-346, miR-6525, miR-181c-5p, miR-378i, miR-217-5p, miR-378a-3p, miR-361-5p, miR-34a-5p, miR-148a-5p, miR-18a-3p, novel\_17, miR-210-5p, miR-618, miR-345-3p, miR-422a, miR-181b-1-3p, miR-376a-5p, miR-143-3p, miR-136-5p, miR-2319b, miR-2483-3p, miR-378g, miR-3596, miR-4443, miR-101-3p, miR-3968, miR-490-5p, miR-885-5p, miR-363-3p, miR-2447, miR-361-3p, miR-1285-5p, miR-323b, miR-21b, novel\_78, miR-1343-3p, miR-145b, miR-181b-2-3p, miR-1298-3p, miR-148b-5p, miR-455-3p, miR-182-5p, miR-16b, miR-323b-3p, miR-29b-1-5p, miR-378d, miR-8485, miR-2448-3p, miR-503-3p, miR-18a, miR-3154, miR-10b-3p, miR-7144-5p, miR-370-3p, miR-34c-5p, miR-2332, miR-370-5p, miR-138-5p, miR-374b-3p, miR-31-3p, miR-133a-3p, miR-3607-3p, miR-374a-3p, miR-378c, miR-134, miR-345-3p, miR-200b-3p, miR-105-2, miR-378h, miR-2411-5p, miR-545-5p, miR-200c, miR-1260a, miR-217, miR-339a, miR-30c-2-3p, miR-200c-3p, miR-181b-5p, miR-2898, miR-92a-3p, miR-107, miR-1286, miR-155-5p, miR-27b-3p, miR-544a, miR-22-3p, miR-544b, miR-412-5p, miR-302a-5p, miR-23b-3p, miR-23c, miR-5010-3p, miR-3600, miR-27a-3p, miR-199b-5p, miR-199a-5p, miR-148b-5p, miR-376a-5p, miR-23a-3p, miR-1983, miR-412-3p, miR-27b-5p, miR-378b, miR-23b, miR-488-3p, miR-199b-5p, miR-199a-5p, novel\_25, miR-22-3p, miR-27a-3p, miR-544-3p, miR-655-5p, miR-216b-3p, miR-592, miR-155-5p, novel\_87, miR-425-5p, miR-199b-5p, miR-154a, miR-6128, miR-30b-3p, miR-129b-3p, miR-134, miR-2113, miR-744-5p, miR-6239, miR-4508, miR-30b-3p, miR-125a, miR-3600, miR-378b, miR-134-5p, miR-185-5p, miR-2404, miR-185-3p, miR-125b, miR-2331-5p, novel\_19, miR-500a-5p, miR-125b-5p, miR-2433, miR-34c-3p, miR-4324, miR-134-5p, miR-125a-5p, miR-4492, miR-128-1-5p, miR-193a, miR-148b-5p, miR-2411, miR-2411-5p, miR-2319b, miR-212-3p, miR-122-3p, miR-466i-5p, miR-2285l, miR-122-3p

ZNF330 ENSOARGO(zinc fin. 6525)

MRC1 ENSOARGO(mannose)

HPSE2 ENSOARGO(heparana)

TLK2 ENSOARGO(tousled-

miR-49b-3p, miR-2285m, miR-42b-5p, let-7i, miR-28c, miR-4324, miR-1247-3p, miR-502b, miR-147-5p, miR-3120-3p, miR-655-5p, miR-320b, miR-411b-3p, miR-323a-5p, miR-2387, miR-148a-3p, miR-379-5p, miR-6395, let-7e-5p, miR-1291, miR-2331-5p, miR-377-3p, miR-224-5p, miR-125a-5p, miR-1343-5p, miR-187-3p, novel\_116, let-7g-5p, miR-134-3p, miR-145a-5p, miR-22-3p, miR-197-3p, miR-542-3p, miR-744-5p, miR-27b-3p, miR-188-5p, miR-4508, miR-30b-3p, novel\_42, miR-145-3p, miR-1197-3p, miR-125b-5p, miR-2433, miR-486b-3p, miR-125a, miR-2285aa, miR-2355-5p, miR-154b-5p, miR-671-5p, miR-876-3p, miR-4286, miR-181a-2-3p, miR-3064-5p, miR-1271-3p, miR-29a-5p, let-7g, miR-3065-3p, miR-2478, miR-28b, let-7c-5p, miR-30f, miR-8117, miR-152-3p, novel\_96, let-7f-5p, miR-222, miR-505-5p, miR-1343-5p, let-7d, miR-3956-3p, miR-885-5p, miR-541-3p, novel\_60, miR-2440, miR-101-3p, miR-2285n, miR-7134-3p, miR-490-5p, miR-3968, miR-499a-5p, miR-2285u, miR-3064-5p, miR-4792, miR-27a-3p, let-7d-5p, miR-499a-3p, miR-378g, miR-221, miR-361-3p, novel\_94, miR-744-3p, miR-23a-3p, miR-382-3p, let-7a-5p, miR-1388-3p, miR-124a, miR-8485, let-7e, miR-491-5p, miR-3085-3p, miR-27a-3p, miR-145b, novel\_4, miR-221-3p, miR-1298-3p, miR-30b-3p, miR-541, miR-484, miR-1839-5p, miR-3074-2-3p, miR-4510, miR-433-5p, let-7b, miR-6134, let-7b-5p, miR-224-5p, miR-320e, miR-222-3p, let-7f, miR-2285j, miR-664a, miR-487b-5p, miR-3065-3p, miR-221-5p, let-7i-5p, miR-22-3p, miR-6130, miR-323-5p, miR-499b-3p, miR-377-3p, miR-433-3p, miR-129b-3p, miR-21a-3p, miR-1827, miR-625-5p, miR-216c-5p, miR-486-3p, miR-2424, miR-125b-2-3p, miR-125b, miR-324-3p, novel\_17, miR-21-3p, let-7k, miR-221-5p, miR-98-5p, miR-212-5p, miR-328-3p, novel\_83, miR-148b-3p, miR-23c, miR-23b-3p, miR-188-3p, miR-5703, miR-140-3p, miR-124-3p, miR-1961, novel\_133, miR-142-3p

miR-142a-5p, miR-181c-5p, miR-2330-3p, miR-214, miR-3958-5p, miR-155-5p, miR-450b-3p, miR-874-5p, miR-487a-5p, miR-4492, miR-424-5p, miR-30e-3p, miR-2285j, miR-222-3p, miR-664a-5p, miR-139-5p, miR-192-5p, miR-155-5p, miR-15b-5p, miR-204-3p, miR-548o-3p, miR-504-5p, miR-21-3p, miR-370-5p, miR-2312, miR-1827, novel\_99, miR-450a-1-3p, miR-2285c, miR-3613-5p, miR-21a-3p, miR-129b-3p, miR-377-5p, miR-130a-5p, miR-376a-5p, miR-2432, miR-2424, miR-216c-5p, miR-20a, miR-760-3p, miR-106a, miR-299-3p, miR-21-3p, miR-2484, novel\_17, miR-196a-3p, miR-92a-1-5p, miR-500a-5p, miR-15a-5p, miR-7859, miR-2284h-5p, miR-106a, miR-18a-3p, miR-548e-3p, miR-1b-3p, miR-380-5p, miR-3600, miR-33b-3p, miR-19b-3p, miR-16-1-3p, miR-1246, miR-215-5p, miR-1434-5p, miR-217-5p, miR-877-3p, miR-8095, miR-3956-3p, miR-885-5p, novel\_60, miR-2447, miR-181d-5p, miR-2285f, miR-499a-5p, miR-490-5p, miR-371a-5p, miR-3082-5p, miR-25, miR-1185-2-3p, miR-27a-3p, miR-10b, miR-20a-3p, miR-139-5p, miR-3064-5p, miR-24-1-5p, miR-211-5p, miR-7977, miR-541-5p, miR-499b-5p, miR-504, miR-1983, miR-544-5p, miR-221, miR-2310, miR-424-5p, miR-1839-3p, miR-106a-5p, miR-376b, miR-3085-3p, miR-2285o, miR-214-3p, miR-106b-5p, miR-16b, miR-505, miR-2957, miR-147a, miR-142-5p, miR-1185-3p, miR-2285e, miR-221-3p, miR-27a-3p, miR-374a-3p, miR-365a-5p, miR-1306-5p, miR-3607-3p, miR-6128, miR-16-5p, miR-331-5p, miR-204-5p, miR-374b-3p, miR-31-3p, miR-2332, miR-370-5p, miR-135a-5p, miR-154b-5p, miR-141-3p, miR-215-5p, miR-2355-5p, miR-329b, miR-10b-3p, miR-23a-5p, miR-3074-1-3p, miR-20b-5p, miR-331-5p, miR-137-3p, miR-450b-5p, miR-24-2-5p, miR-490-3p, miR-192-3p, miR-29a-5p, miR-181a-2-3p, miR-3064-5p, miR-181b-5p, miR-200a-3p, novel\_127, miR-125a-3p, miR-205-5p, miR-217, miR-24-2-5p, miR-322-5p, miR-450a-1-3p, miR-582-3p, miR-545-5p, miR-6517, miR-299a-3p, miR-222, miR-7641, miR-

miR-3591-3p, miR-18a-3p, miR-150-5p, miR-2387, miR-135b-5p, miR-378f, miR-146b-5p, miR-335-3p, miR-136-5p, miR-7977, miR-3074-5p, miR-320c, miR-34b, miR-378g, miR-378e, miR-34c, miR-371a-5p, miR-4324, miR-450a-5p, miR-499a-5p, miR-17-3p, miR-885-5p, miR-3956-3p, novel\_60, miR-3059-5p, miR-2428, miR-449a, miR-24-3p, miR-145a-5p, miR-378b, miR-6529a, miR-3120-5p, miR-2284x, miR-380-3p, miR-378c, miR-145b, miR-5010-3p, miR-105-1, miR-2300a-5p, miR-31-5p, miR-149-5p, miR-9788-3p, miR-539-5p, miR-3431, miR-134-3p, miR-185-5p, miR-147a, miR-197-5p, miR-105-5p, miR-146a, novel\_103, miR-320b, miR-466f-3p, miR-146b, miR-3955-3p, miR-668-3p, miR-345-5p, miR-378d, miR-320a, miR-487b-5p, miR-129b-3p, miR-200a-5p, miR-331-5p, miR-543-3p, miR-625-5p, miR-345-5p, miR-345-5p, miR-552-3p, miR-215-5p, miR-21-3p, miR-574-5p, miR-378a-3p, miR-877-5p, miR-34c-5p, miR-135a-5p, miR-494-5p, miR-669a-3p, miR-874-5p, miR-208b-5p, miR-4492, miR-17-3p, miR-487b-5p, miR-331-5p, miR-6128, miR-3074-5p, miR-3184-3p, miR-378c, miR-539-5p, let-7e-3p, miR-378c, miR-122-5p, miR-1197-3p, miR-378a-3p, miR-188-3p, miR-215-5p, miR-1290, miR-2300b-3p, miR-378i, miR-34a-5p, miR-664-5p, miR-105-2, miR-4429, miR-18a-3p, novel\_121, miR-378h, miR-758-5p, miR-422a, miR-185-3p, miR-30f, miR-125a-3p, miR-200c, novel\_127, miR-1277-5p, miR-34b-5p, miR-466i-5p, miR-200c-3p, miR-127-5p, miR-320d, miR-450a-2-3p, miR-17-3p, miR-495-5p, miR-450c-5p, miR-146a-5p, miR-664b-3p, miR-331-3p, miR-324-3p, miR-135a-5p, miR-4492, miR-134-5p, miR-486b-3p, miR-592, miR-539-5p, miR-3074-5p, miR-214, miR-145-3p, miR-3184-5p, miR-338-3p, let-7g-3p, miR-329a, miR-1895, miR-7144-5p, miR-671-5p, miR-582-5p, miR-574-5p, miR-2331-3p, miR-370-3p, miR-182-5p, miR-141-3p, miR-532-5p, miR-2284s, miR-582-5p, miR-3959-5p, miR-216b-5p, miR-193b-3p, miR-204-3p, miR-154b-5p, miR-877-5p, miR-205-5p, miR-324-3p, miR-21-3p, miR-200a-3p, miR-195a-3p, miR-3064-5p, miR-28b, miR-2478, miR-142a-3p, miR-181b-1-3p, miR-2432, miR-486-3p, miR-143-3p, novel\_133, miR-134, miR-362-3p, miR-5703, miR-330-5p, miR-128-3p, miR-378d, miR-6517, miR-3600, miR-302a-5p, miR-134-5p, miR-2284z, novel\_82, miR-4324, miR-2285n, miR-28c, miR-382-5p, miR-107-5p, miR-2447, novel\_60, miR-3956-3p, miR-2285f, miR-193b-3p, miR-495-3p, miR-24-3p, miR-423-5p, miR-326-3p, miR-2285ab, miR-150-5p, miR-216a-3p, miR-135b-5p, miR-3064-5p, miR-3074-5p, miR-320b, miR-677, miR-203-3p, miR-6535, miR-181b-3p, miR-7-5p, miR-326, miR-362-3p, miR-182-5p, miR-3085-3p, miR-25-5p, miR-193a-3p, miR-214-3p, miR-103a-2-5p, miR-382, miR-628-5p, miR-432-3p, miR-654-3p, miR-873a-5p, miR-329-3p, miR-7b-5p, miR-1843b-5p, miR-125b-2-3p, miR-362-3p, miR-16-2-3p, miR-2284aa, miR-31-5p, novel\_4, miR-2300a-5p, miR-409b, miR-181b-2-3p, miR-147a, miR-142-3p

miR-2404, miR-320c, miR-144-3p, miR-216b-3p, miR-19a-3p, miR-107, miR-9851-3p, miR-195a-5p, miR-379-5p, miR-148a-3p, miR-18b, miR-3970, miR-3065-5p, miR-216a-3p, miR-3591-3p, miR-323c, novel\_27, miR-2284w, miR-135a-2-3p, miR-92a-3p, novel\_1, miR-656-5p, miR-199c, miR-147-5p, miR-4324, miR-15a, miR-6529b, miR-20a-5p, miR-16a, miR-425-5p, miR-149-5p, miR-103, miR-20b, miR-2355-3p, miR-31-5p, miR-103a-3p, miR-16b, miR-16-1-3p, miR-497-5p, miR-188-5p, miR-2284x, miR-19b-2-5p, miR-542-3p, miR-1843b-5p, miR-1434-3p, miR-197-3p, miR-3071-5p, miR-374b-3p, miR-2284l, let-7j, miR-130b-5p, miR-125a-5p, miR-32, miR-17-5p, miR-106a-5p, miR-25-3p, miR-3959-5p, miR-324-5p, miR-574-5p, miR-3068-3p, miR-2355-5p, miR-141-3p, miR-125a, miR-215-5p, miR-876-3p, miR-10a-3p, miR-20b-5p, miR-671-5p, miR-30e-5p, miR-503-3p, miR-331-5p, miR-93-5p, miR-320a, miR-18a, miR-17-5p, miR-93, miR-1306-5p, novel\_42, miR-16-5p, miR-193a-5p, miR-331-5p, miR-486b-3p, miR-144, miR-6740-5p, miR-125b-5p, miR-100-3p, miR-322-5p, miR-9-5p, miR-450a-1-3p, miR-214-5p, miR-429-3p, miR-7641, miR-18b-5p, miR-376a-5p, miR-128-3p, miR-30c, miR-200b-3p, miR-155-5p, miR-3591-5p, miR-30a-5p, miR-92b-3p, miR-148b-5p, miR-450b-5p, miR-200a, miR-376c-5p, miR-1271-3p, miR-3529-3p, miR-30a-3p, miR-181a-2-3p, miR-450a-2-3p, miR-127-5p, miR-200c-3p, miR-107, miR-543-5p, miR-92a-3p, miR-152-3p, miR-200a-3p, miR-205-5p, miR-200c, miR-217, miR-20a-3p, miR-7977, miR-3963, miR-668-5p, miR-376a-3p, novel\_94, miR-544-5p, miR-2447, miR-363-3p, miR-6527, miR-9-5p, miR-2284q, miR-30b-5p, novel\_82, miR-142-3p, miR-199b-3p, miR-1343-3p, miR-2300a-5p, miR-548w, miR-1388-5p, miR-2426, miR-21b, miR-3120-5p, miR-484, miR-143-5p, miR-758-3p, miR-3187-3p, miR-758-3p, miR-127-3p, miR-106a-5p, miR-101b-3p, miR-494-3p, miR-424-5p, miR-32a-5p, miR-487h-5p, miR-199a-3p, miR-320b, miR-320c, miR-412-5p, miR-3082-5p, miR-26b-3p, miR-1983, miR-9-3p, miR-1248, miR-412-3p, miR-4429, miR-1a-3p, miR-320a, miR-206-3p, miR-1, miR-425-5p, miR-22-5p, miR-124-5p, miR-320d, miR-206, miR-425-5p, miR-320e, miR-320b, miR-4324

VPS33B ENSOARGO( vacuolar

CA5A ENSOARGO( carbonic



miR-2447, miR-363-3p, miR-3956-3p, miR-361-3p, novel\_82, miR-218-5p, miR-101-3p, miR-628-3p, miR-3968, miR-2319b, miR-25, miR-378g, miR-140-5p, miR-221, miR-381-3p, miR-299b-5p, miR-96-5p, miR-504, miR-376a-3p, miR-493-5p, miR-9-3p, miR-101b-3p, miR-23a-3p, miR-29b-1-5p, miR-16b, miR-1185-5p, miR-487b-5p, miR-199b-5p, miR-153-3p, miR-214-3p, miR-153, miR-376b-3p, miR-2284r, miR-758-3p, miR-101c, miR-21b, let-7b, miR-3184-3p, miR-3074-5p, miR-214, miR-6525, miR-122-5p, let-7f, let-7b-3p, miR-2285j, miR-151-3p, miR-664a-5p, miR-665, miR-4492, miR-129-5p, miR-32-5p, miR-30c-1-3p, miR-504-5p, miR-2284s, let-7i-5p, miR-15b-5p, miR-2285c, miR-129b-3p, miR-345-5p, miR-625-5p, miR-1827, miR-329a-5p, miR-376a-5p, miR-421-5p, miR-143-3p, miR-618, miR-2285p, miR-324-3p, miR-500a-5p, miR-98-5p, let-7k, miR-380-5p, miR-212-5p, miR-23b-3p, miR-23c, miR-1247-5p, miR-328-3p, miR-193b-5p, miR-1961, miR-218-1-3p, miR-16-1-3p, miR-361-5p, miR-758-5p, miR-2284w, miR-199b-5p, miR-4324, miR-421-5p, miR-3074-5p, miR-144-3p, miR-376b-5p, let-7e-5p, miR-493-5p, miR-432-3p, miR-105-5p, miR-378a-5p, miR-196b-5p, miR-483-3p, miR-31-5p, miR-103a-3p, miR-134-3p, miR-411-5p, novel\_116, miR-19b-2-5p, miR-1843b-5p, miR-22-3p, novel\_23, miR-16b, miR-16-1-3p, miR-497-5p, miR-16-5p, miR-1260b, miR-6740-5p, miR-125b-5p, miR-574-5p, miR-3068-3p, miR-125a, miR-25-3p, miR-3959-5p, miR-301, miR-23b, miR-376c-5p, miR-345-5p, miR-3064-5p, miR-92b-3p, let-7g, let-7f-5p, miR-429-3p, miR-322-5p, novel\_121, miR-196a-5p, miR-1290, miR-330-5p, miR-155-5p, novel\_60, miR-212-3p, miR-2285f, miR-452-5p, miR-362-5p, miR-3064-5p, miR-452-3p, miR-499b-5p, miR-7977, miR-3082-5p, let-7d-5p, miR-376d, miR-199b-5p, miR-129b-5p, novel\_94, miR-877-3p, let-7a-5p, miR-424-5p, miR-30c-1-3p, miR-193a, miR-758-3p, miR-326, novel\_103, miR-3085-3p, miR-

miR-151-3p, miR-19b-1-5p, miR-3604, miR-338-5p, let-7b-3p, miR-2285j, miR-874-5p, miR-424-5p, miR-454-3p, miR-425-5p, miR-214, miR-3074-2-3p, miR-590-3p, miR-539-5p, miR-129-2-3p, miR-338-3p, miR-6525, miR-98-3p, miR-129b-3p, miR-21a-3p, let-7f-1-3p, miR-543-3p, miR-582-5p, miR-1827, let-7g-3p, miR-133b-3p, miR-21-3p, miR-216b-3p, miR-296-3p, miR-496-3p, miR-548o-3p, miR-15b-5p, miR-301a-3p, miR-582-5p, miR-500a-5p, miR-92a-1-5p, miR-345-3p, miR-26a-5p, miR-34b-5p, miR-1277-5p, miR-30b-3p, miR-3653-3p, miR-2284m, miR-195a-3p, miR-2424, miR-2285i, miR-181b-1-3p, miR-98-3p, miR-188-3p, miR-1434-5p, miR-133a-3p, let-7a-3p, miR-34a-5p, miR-2284u, miR-23b-3p, miR-148b-3p, miR-15a-5p, miR-23c, miR-2440, miR-490-5p, miR-7134-3p, miR-2284q, miR-499a-5p, miR-335, miR-1296-5p, miR-2284j, miR-194b-5p, miR-3059-5p, miR-885-5p, miR-877-3p, miR-362-5p, miR-381-3p, novel\_94, miR-147-3p, miR-499b-5p, miR-2285u, miR-211-5p, miR-7977, miR-2284g, miR-24-1-5p, miR-20a-3p, miR-144-5p, miR-203-3p, miR-27a-3p, miR-454-5p, miR-2483-3p, miR-16b, miR-214-3p, miR-491-5p, miR-130b-3p, let-7c-3p, miR-23a-3p, miR-1388-3p, miR-424-5p, miR-30b-3p, miR-6529a, miR-2284aa, miR-5010-3p, miR-27a-3p, miR-181b-2-3p, novel\_78, miR-409b, miR-151a-3p, miR-548w, miR-500-5p, miR-331-3p, miR-2284k, miR-29b-3p, miR-1-5p, miR-5100, miR-204-5p, miR-592, miR-331-5p, miR-16-5p, miR-133a-3p, miR-144-5p, miR-28a-3p, miR-2284v, miR-365a-5p, miR-500b-5p, miR-362-5p, miR-23b, miR-381-3p, miR-331-5p, miR-503-3p, miR-7144-5p, miR-671-5p, miR-876-3p, miR-2355-5p, miR-141-3p, miR-503-3p, miR-223-5p, miR-324-5p, miR-2284n, miR-34c-5p, miR-365a-3p, miR-181c-3p, miR-125a-3p, miR-200a-3p, novel\_96, miR-152-3p, miR-28-3p, miR-1a-2-5p, miR-200a, miR-2284y, miR-2284a, miR-24-2-5p, miR-148b-5p, miR-2127, miR-29d-3p, miR-315-3p, miR-3578, miR-1290, miR-196, miR-6130, miR-499b-3p, miR-377-3p, miR-598-3p, miR-21-3p, miR-3065-3p, miR-1277-3p, miR-30c-1-3p, miR-504-5p, novel\_99, miR-2318, miR-655, miR-598-3p, miR-301, miR-6134, miR-214, miR-4510, miR-433-5p, miR-655-3p, miR-29b-2-5p, miR-29b-3p, miR-2285j, miR-214-5p, miR-483-3p, miR-376a-5p, miR-3960, miR-105-2, miR-218-1-3p, miR-140-3p, miR-5703, miR-29d-3p, miR-196a-5p, novel\_133, miR-2424, miR-3065-3p, miR-2478, miR-369-3p, miR-29b-2-5p, miR-30b-3p, miR-127-5p, miR-500a-5p, miR-324-3p, miR-30c-2-3p, miR-29a-3p, miR-3596, miR-499a-3p, novel\_94, miR-6516-3p, miR-376a-2-5p, miR-504, miR-3591-3p, miR-378b, novel\_27, miR-371b-3p, miR-361-3p, miR-29c-3p, miR-3957-3p, miR-335-5p, miR-342-3p, miR-6123, miR-335, miR-29a, miR-4726-5p, miR-4324, miR-665, miR-1343-3p, miR-105-1, miR-31-5p, miR-7862, miR-29b, miR-3071-5p, miR-1434-3p, miR-1843b-5p, miR-2284r, miR-296-5p, miR-503-3p, miR-30c-1-3p, miR-432-3p, miR-214-3p, miR-483-3p, miR-196b-5p, miR-105-5p, miR-377-3p, miR-342

miR-181c-5p, miR-6525, miR-214, miR-4510, miR-129-2-3p, miR-145a-3p, miR-4492, miR-129-5p, miR-655-3p, miR-2285j, miR-22-3p, miR-204-3p, miR-877-5p, miR-27a-5p, miR-377-3p, miR-582-5p, miR-216b-5p, miR-6130, miR-296-3p, miR-552-3p, miR-504-5p, miR-543-3p, miR-582-5p, miR-2312, miR-655, miR-345-3p, miR-30b-3p, miR-21-3p, miR-320d, miR-466i-5p, miR-324-3p, miR-125b, miR-185-3p, miR-210-5p, miR-26a-5p, miR-671-3p, miR-378d, miR-4429, miR-1197-5p, miR-2366, miR-361-3p, miR-877-3p, miR-2285f, miR-181d-5p, miR-3059-5p, miR-2447, miR-2285t, miR-2285n, novel\_82, miR-1185-2-3p, miR-25, miR-378g, miR-2285u, miR-4792, miR-24-1-5p, miR-3064-5p, miR-335-3p, miR-504, miR-378j, miR-361-3p, miR-199b-5p, miR-8485, miR-758-3p, miR-382-3p, miR-2330-5p, miR-199b-5p, miR-214-3p, miR-491-5p, miR-3085-3p, miR-3955-3p, miR-320b, miR-326, novel\_103, miR-1306-5p, miR-1185-3p, miR-1298-3p, miR-1343-3p, novel\_78, miR-758-3p, miR-331-3p, miR-125b-5p, miR-199a-5p, miR-125a, miR-574-5p, miR-7144-5p, miR-320a, miR-488-3p, miR-424-3p, novel\_39, miR-200a, miR-199a-5p, miR-490-3p, miR-450b-5p, miR-24-2-5p, miR-3064-5p, novel\_96, miR-200c-3p, miR-181b-5p, miR-200c, miR-129-1-3p, miR-429-3p, miR-6517, miR-582-3p, miR-2427, miR-330-5p, miR-326-3p, miR-199b-5p, miR-24-3p, novel\_87, miR-320c, miR-26b-5p, miR-378b, miR-379-5p, miR-450b-3p, miR-1291, miR-3970, miR-1306, miR-2285ab, let-7j, miR-503-3p, miR-2285r, miR-432-3p, miR-125a-5p, novel\_51, miR-7-5p, miR-377-3p, miR-134-3p, miR-26b-3p, miR-2284x, miR-22-3p, novel\_23, miR-181a-5p, miR-7b-5p

miR-189b, miR-18a-5p, miR-34b-5p, miR-21-3p, miR-216b-3p, miR-221-5p, miR-140-5p, miR-204-3p, novel\_25, miR-15b-5p, miR-30a-3p, miR-324-3p, miR-132-5p, miR-151-3p, miR-3604, miR-320e, miR-30e-3p, miR-424-5p, miR-130b-5p, miR-214, miR-665-5p, miR-3074-2-3p, miR-6525, miR-224-5p, miR-2904, miR-188-3p, miR-1197-5p, novel\_133, miR-2366, miR-376a-5p, miR-378d, miR-4429, miR-30d-3p, miR-212-5p, miR-548e-3p, miR-532-3p, miR-15a-5p, miR-216a-5p, miR-500a-5p, miR-185-3p, miR-345-3p, miR-26a-5p, miR-221-5p, miR-3653-3p, miR-320d, miR-466i-5p, miR-2424, miR-2411, miR-143-3p, miR-376a-5p, miR-29b-1-5p, miR-125b-2-3p, miR-377-5p, miR-378j, miR-1983, miR-544-5p, novel\_94, miR-541-5p, miR-7977, miR-211-5p, miR-664b, miR-24-1-5p, miR-452-3p, miR-2319b, miR-652-3p, miR-203-3p, miR-378g, miR-489, miR-1973, miR-3958-3p, miR-194b-5p, miR-9-5p, miR-452-5p, miR-3059-5p, miR-2447, miR-885-5p, miR-8095, miR-877-3p, novel\_111, miR-1839-5p, miR-299a-5p, miR-2426, miR-151a-3p, miR-330-3p, miR-147a, miR-29b-1-5p, miR-16b, miR-320b, miR-1306-5p, novel\_115, novel\_103, miR-326, miR-214-3p, miR-676-3p, miR-424-5p, miR-2330-5p, miR-193a, miR-137-3p, miR-376c-5p, miR-18a, miR-3154, miR-320a, miR-376c-5p, miR-7144-5p, miR-23a-5p, miR-671-5p, novel\_91, miR-345-5p, miR-370-3p, miR-2285aa, miR-1271, miR-3956, miR-574-5p, miR-154b-5p, miR-365a-3p, miR-331-3p, miR-3969, miR-135a-1-3p, miR-204-5p, miR-592, miR-16-5p, miR-6128, miR-365a-5p, miR-1260b, miR-1343-5p, miR-330-5p, miR-345-3p, miR-1290, miR-18b-5p, miR-582-3p, miR-24-2-5p, miR-9-5p, miR-322-5p, miR-483-3p, miR-2411-5p, miR-1260a, miR-664-3p, miR-6119-5p, miR-107, miR-450a-2-3p, miR-30a-3p, miR-4286, miR-181a-2-3p, miR-200a, miR-2285b, miR-24-2-5p, miR-1306, miR-376b-5p, miR-18b, miR-195a-5p, miR-107, miR-412-3p, miR-26b-5p, miR-320c, miR-16a, miR-15a, miR-6402, miR-576-3p, miR-421-5p, miR-

novel\_68, miR-2404, miR-29a-3p, novel\_69, miR-144-3p, miR-3591-3p, miR-450b-3p, miR-19a-3p, miR-146b-5p, miR-135b-5p, miR-29c-3p, miR-17-3p, miR-211, miR-24-3p, miR-301b-3p, miR-142b, novel\_87, miR-206, novel\_1, miR-29a, miR-2284d, miR-149-5p, miR-544b, miR-653, miR-7b-5p, miR-1285, novel\_23, miR-138, miR-29b, miR-219a-1-3p, let-7f-2-3p, let-7f-2-3p, miR-7-5p, miR-146a, miR-105-5p, miR-106b-3p, miR-452-5p, miR-2285aa, miR-2355-5p, miR-1271, miR-365a-3p, miR-2284n, miR-331-5p, miR-137-3p, miR-3154, miR-767, miR-329b, miR-7144-5p, miR-28a-3p, miR-2284v, miR-3607-3p, miR-145-3p, miR-29b-3p, miR-2284k, miR-1306-3p, miR-2332, miR-331-3p, miR-144, miR-135a-5p, miR-138-5p, miR-767-5p, miR-331-5p, miR-204-5p, miR-429-3p, miR-1224-5p, miR-1271-5p, miR-29d-3p, miR-23b-5p, miR-501-3p, miR-582-3p, miR-105-2, miR-200b-3p, miR-155-5p, miR-3529-3p, miR-1, miR-4286, miR-450b-5p, miR-ADAM12 ENSOARGO(ADAM met:2284y, novel\_39, miR-3065-3p, miR-2284a, miR-200c, miR-217, miR-17-3p, miR-28-3p, miR-200c-3p, miR-127-5p, miR-2284g, miR-139-5p, miR-4792, miR-20a-3p, miR-541-5p, miR-499b-5p, miR-211-5p, miR-2483-3p, miR-3082-5p, miR-489, miR-1185-2-3p, miR-500-3p, miR-4443, miR-1306-3p, miR-96-5p, miR-3059-5p, miR-541-3p, miR-2284j, miR-877-3p, miR-502-3p, miR-8095, miR-628-3p, miR-4726-5p, miR-490-5p, miR-409b, miR-105-1, miR-222-5p, miR-216a-3p, miR-148b-5p, miR-421, miR-1185-3p, miR-2459, miR-484, miR-541, miR-1a-3p, miR-501-3p, miR-450b-5p, miR-544a, miR-21b, miR-3120-5p, miR-574-3p, miR-101b-3p, miR-2284b, miR-193a, miR-2957, miR-146b, miR-2331-3p, miR-3065-3p, miR-21-3p, miR-544-3p, miR-301a-3p, miR-139-5p, novel\_25, miR-155-5p, miR-21a-3p, miR-129b-3p, miR-543-3p, miR-145a-3p, miR-1271, miR-665-5p, miR-206-3p, miR-346, miR-2285j, miR-324-3p, miR-664a-5p, miR-320a, novel\_74, miR-155-5p, miR-17-3p, miR-19a-5p, miR-151-3p, miR-181a-5p, miR-4791, miR-301b-5p, miR-758-3p, novel\_23, miR-187-3p, novel\_78, miR-330-3p, miR-339-5p, miR-3535, miR-147a, miR-3431, novel\_116, miR-221-3p, miR-2355-3p, miR-330-3p, miR-487b-5p, miR-130b-5p, miR-6240, miR-494-3p, let-7c-3p, miR-2284l, miR-193a, miR-758-3p, miR-221, miR-129b-5p, miR-2319a, novel\_94, miR-329-5p, miR-452-3p, miR-30b-5p, miR-133a-5p, miR-382-5p, miR-301a-5p, miR-335, miR-22-5p, miR-335-5p, miR-181d-5p, miR-2284w, miR-30c-5p, novel\_133, miR-30a-5p, miR-155-5p, miR-30c, miR-222, miR-6517, novel\_79, miR-582-3p, miR-30b, miR-205-5p, miR-8117, miR-30f, miR-339a, miR-181b-5p, miR-30d, miR-21-3p, miR-369-3p, miR-181a-2-3p, miR-21a-3p, miR-30e-5p, miR-424-3p, miR-30d-5p, miR-339b, miR-30f, novel\_99, miR-582-5p, miR-27a-5p, miR-365a-3p, miR-155-5p, miR-222-3p, miR-338-5p, miR-487b-5p, novel\_9, miR-155-5p, miR-410-3p, miR-130b-5p, miR-1306-5p, miR-145a-3p, miR-193a-5p, miR-1197-3p, miR-181c-5p

miR-2284r, miR-541, miR-1388-5p, miR-199b-3p, miR-330-3p, novel\_78, miR-181b-2-3p, miR-539-5p, miR-148b-5p, miR-455-3p, miR-1185-3p, miR-199a-3p, miR-16b, miR-182-5p, miR-103a-2-5p, miR-214-3p, miR-1388-3p, miR-378d, miR-140-5p, miR-221, miR-381-3p, miR-136-5p, miR-376a-3p, miR-9-3p, miR-2319b, miR-378g, miR-1185-2-3p, miR-500-3p, miR-3968, miR-490-5p, miR-6527, miR-361-3p, novel\_111, miR-378i, miR-2366, miR-378a-3p, miR-217-5p, miR-142-3p, miR-33b-3p, miR-16-1-3p, miR-148a-5p, miR-380-5p, miR-328-3p, miR-618, novel\_17, miR-210-5p, miR-500a-5p, miR-345-3p, miR-92a-1-5p, miR-422a, miR-202-5p, miR-487a, miR-376a-5p, miR-181b-1-3p, miR-2424, miR-486-3p, miR-143-3p, miR-450a-1-3p, miR-433-3p, miR-345-5p, miR-543-3p, miR-186-5p, miR-1827, miR-30c-1-3p, miR-548o-3p, miR-154a-3p, miR-296-3p, miR-2284s, miR-10a, miR-216b-5p, miR-15b-5p, let-7b-3p, miR-2285j, miR-665, novel\_74, miR-451a, miR-874-5p, miR-129-5p, miR-3074-5p, miR-3184-3p, miR-214, miR-224-5p, miR-181c-5p, miR-432, miR-7b-5p, miR-22-3p, miR-450c-3p, miR-16b, miR-16-1-3p, miR-497-5p, miR-26a-2-3p, miR-27b-3p, miR-31-5p, miR-412-5p, miR-134-3p, miR-194-3p, miR-149-5p, miR-7-5p, miR-296-3p, miR-2411-3p, miR-194a, miR-378a-5p, miR-6240, let-7f-2-3p, let-7f-2-3p, miR-432-3p, miR-432-3p, miR-503-3p, miR-376b-5p, miR-148a-3p, miR-1306, miR-216a-3p, miR-2319a, miR-378f, miR-216b-3p, miR-3074-5p, miR-3120-3p, miR-677, miR-6535, miR-320c, miR-144-3p, miR-181b-3p, miR-425-5p, novel\_87, miR-29a, miR-379-3p, miR-625-3p, miR-1a-1-5p, miR-29c-3p, miR-758-5p, miR-2284w, miR-23b-5p, miR-330-5p, miR-2285ad, miR-429-3p, miR-412, miR-322-5p, miR-450a-1-3p, miR-1a-2-5p, miR-152-3p, miR-200a-3p, miR-148b-5p, novel\_39, miR-29a-5p, miR-450c-5p, miR-301, miR-137-3p, miR-376c-5p, miR-767, miR-2318, miR-345-5p, miR-1248, miR-874-3p, miR-2255-5p, miR-2956, miR-2959-5p, miR-222-5p, miR-101-5p, miR-345-3p, miR-125b-2-3p, miR-2285af, miR-7-5p, miR-200c, miR-17-3p, miR-196b-5p, miR-200c-3p, miR-1b-3p, miR-412, miR-3600, miR-145b, miR-429-3p, miR-200b, miR-412-3p, miR-7857, miR-145a-5p, miR-196a-5p, miR-7b-5p, miR-200b-3p, miR-188-5p, miR-17-3p, miR-2447, miR-211, miR-665, miR-135a-1-3p, miR-204-5p, miR-17-3p, miR-21-3p, miR-211-5p, miR-204-3p, miR-2284s, miR-3591-3p, miR-301, miR-1248

LTA4H

ENSOARGO(leukotri

OTOR

ENSOARGO(otorapli

miR-2285af, miR-6119-5p, miR-450a-2-3p, miR-181b-5p, miR-200c-3p, miR-29b-2-5p, miR-181a-2-3p, miR-345-3p, miR-3591-5p, miR-128-3p, miR-105-2, miR-200b-3p, miR-300, miR-429-3p, miR-2284z, miR-6740-5p, miR-2284k, miR-31-3p, miR-6128, miR-144-5p, miR-133a-3p, miR-1306-5p, miR-2284v, miR-93, miR-93-5p, miR-17-5p, miR-381-3p, miR-20b-5p, miR-2284n, miR-3965, miR-330-3p, miR-105-5p, miR-2411-3p, miR-106a-5p, miR-17-5p, miR-7-5p, miR-377-3p, miR-363-5p, miR-6240, miR-493-5p, miR-432-3p, miR-145a-5p, miR-708-3p, miR-181a-5p, miR-7b-5p, miR-2284ab, miR-380-3p, miR-31-5p, novel\_116, miR-544b, miR-20b, miR-2284d, miR-382-5p, miR-4324, miR-142b, miR-20a-5p, miR-421-5p, miR-542-5p, novel\_101, miR-216a-3p, miR-450b-3p, miR-320b, miR-2404, miR-345-3p, miR-196a-3p, miR-542-5p, miR-2484, miR-106a, miR-2284m, miR-20a, miR-345-3p, miR-216c-5p, miR-183-5p, miR-380-3p, miR-142a-3p, miR-140-3p, miR-142-3p, miR-33b-3p, miR-106a, miR-1247-5p, miR-200b, miR-151-3p, miR-29b-2-5p, miR-665, miR-2285j, miR-181c-5p, miR-6525, miR-433-3p, miR-133b-3p, miR-204-3p, miR-377-3p, miR-2284s, miR-544-3p, miR-499b-3p, miR-323b-3p, miR-505, miR-106b-5p, miR-542-5p, miR-652-5p, miR-1388-3p, miR-106a-5p, miR-8485, miR-3187-3p, miR-7857, miR-323b, miR-2284aa, miR-544a, miR-145b, novel\_4, miR-151a-3p, miR-330-3p, novel\_78, miR-105-1, miR-142-3p, miR-2285n, miR-2440, miR-3968, miR-181d-5p, miR-2284j, miR-452-5p, miR-2447, miR-212-3p, miR-493-5p, miR-9-3p, miR-668-5p, miR-144-5p, miR-454-5p, miR-499a-3p, miR-489

miR-767, miR-2318, miR-34b-5p, miR-30e-5p, miR-331-5p, miR-376c-3p, miR-574-5p, miR-874-3p, miR-3068-3p, miR-1271, miR-3432a, miR-592, miR-100-3p, miR-30c, miR-3591-5p, miR-1290, miR-2427, miR-505-5p, miR-129-1-3p, miR-429-3p, novel\_79, miR-127-5p, miR-200a-3p, miR-152-3p, novel\_127, miR-125a-3p, miR-664-3p, miR-450b-5p, miR-148b-5p, miR-29a-5p, novel\_39, miR-148a-3p, miR-1306, miR-677, miR-669, miR-181b-3p, miR-29a, miR-421-5p, miR-6123, novel\_87, miR-374c-5p, miR-1839-3p, miR-29c-3p, miR-16-1-3p, miR-26a-2-3p, miR-432, miR-19b-2-5p, miR-542-3p, miR-197-3p, miR-412-5p, miR-3535, miR-411-5p, novel\_116, miR-194-3p, miR-31-5p, miR-339-5p, miR-296-3p, miR-377-3p, miR-2285v, miR-380-5p, miR-493-5p, miR-668-3p, miR-628-5p, miR-345-5p, miR-339b, miR-186-5p, miR-129b-3p, miR-500a-3p, miR-655, miR-30d-5p, miR-377-3p, miR-376e-3p, miR-582-5p, miR-499b-3p, miR-30c-1-3p, miR-2331-3p, miR-451a, miR-1468-5p, miR-500, miR-129-5p, miR-130b-5p, miR-15b-3p, miR-151-3p, miR-122-5p, miR-129-2-3p, miR-214, miR-16-1-3p, miR-148a-5p, miR-30c-5p, miR-210-3p, miR-2284h-5p, miR-1247-5p, miR-328-3p, miR-18a-3p, miR-212-5p, miR-30b, miR-210-5p, novel\_17, miR-345-3p, miR-421-5p, miR-376a-5p, miR-181b-1-3p, miR-376c-3p, miR-143-3p, miR-2285w, miR-369-3p, miR-195a-3p, miR-335-3p, miR-493-5p, miR-409-5p, miR-1306-3p, miR-378j, miR-499a-3p, miR-203-3p, miR-500-3p, miR-126b-5p, miR-3968, novel\_82, miR-218-5p, miR-877-3p, miR-2447, miR-3956-3p, miR-501-3p, miR-758-3p, miR-153, miR-147a, miR-455-3p, miR-148b-5p, miR-2459, miR-126a-5p, novel\_78, miR-1343-3p, miR-181b-2-3p, miR-1185-5p, miR-153-3p, miR-214-3p, miR-505, miR-124a, miR-10b-3p, miR-7144-5p, miR-671-5p, miR-488-3p, miR-381-3p, miR-2448-3p, miR-362-5p, miR-3154, miR-141-3p, miR-615-5p, miR-138-5p, miR-767-5p, miR-28-5p, miR-110-5p, miR-29b-3p, miR-370-5p, miR-1306-



miR-30a-3p, miR-1, miR-29b-2-5p, miR-3529-3p, miR-490-3p, miR-30f, miR-152-3p, miR-2898, miR-18b-5p, miR-299a-3p, novel\_121, miR-30a-5p, miR-10a-5p, miR-300, miR-6128, miR-3607-3p, miR-93, miR-144, miR-2285aa, miR-574-5p, miR-376c-3p, miR-365a-3p, miR-93-5p, miR-3154, miR-18a, miR-17-5p, miR-20b-5p, miR-1814c, miR-1248, miR-382, miR-493-5p, miR-432-3p, miR-190a, miR-106a-5p, miR-17-5p, miR-377-3p, miR-466f-3p, miR-31-5p, miR-3535, miR-1285, miR-1434-3p, miR-16-1-3p, miR-495-3p, miR-24-3p, miR-382-5p, miR-33a-3p, miR-20a-5p, miR-576-3p, miR-203b-5p, miR-147-5p, miR-206, miR-10a-5p, miR-144-3p, miR-677, miR-181b-3p, miR-299b-3p, miR-1306, miR-148a-3p, miR-18b, miR-412-3p, miR-19a-3p, miR-2285w, miR-29b-1-5p, miR-376c-3p, miR-181b-1-3p, miR-299-3p, miR-106a, miR-202-5p, miR-466i-5p, miR-30d-3p, miR-106a, miR-2284h-5p, miR-532-3p, miR-148b-3p, miR-124-3p, miR-5703, miR-140-3p, novel\_133, miR-16-1-3p, miR-361-5p, miR-19b-3p, miR-539-5p, miR-10b-5p, miR-346, miR-206-3p, miR-30a-3p, miR-29b-2-5p, miR-30e-3p, miR-190a-5p, miR-500, novel\_74, miR-548o-3p, novel\_32, miR-377-3p, miR-10a, miR-376e-3p, miR-500a-3p, miR-30d-5p, miR-18a-5p, miR-124a, miR-106a-5p, miR-2310, miR-29b-1-5p, miR-106b-5p, miR-1306-5p, miR-181b-2-3p, novel\_78, miR-2300a-5p, miR-2459, miR-421, miR-147a, miR-1a-3p, miR-301b-5p, miR-4791, miR-10b, miR-101c, miR-101a-5p, miR-450b-5p, miR-1296-5p, miR-452-5p, miR-190b-5p, miR-212-3p, miR-361-3p, miR-301a-5p, miR-101-3p, miR-2284q, miR-499b-5p, miR-4792, miR-10b, miR-493-5p, miR-1983, miR-544-5p

RHAG ENSOARGO(Rh-assoc) miR-2284n, miR-323a-5p, miR-425-3p, miR-2284d, miR-323-5p, miR-370-5p, novel\_78, miR-133a-3p, miR-485-5p, miR-2284u, miR-301, miR-3578, miR-2284y, miR-450c-5p, miR-2284a, miR-2284j, miR-1193, miR-2403, miR-2284b, miR-4286, miR-2284v, miR-450a-5p, miR-371a-5p, miR-2284k, miR-551b-3p, miR-370-5p

PLEKHA4 ENSOARGO(pleckstr) miR-224-5p, miR-539-5p, miR-4510, miR-4492, miR-331-3p, miR-324-3p, miR-26c, miR-29b-3p, miR-204-3p, miR-3957, miR-499b-3p, miR-2284s, miR-216b-5p, miR-6130, miR-3065-3p, miR-2355-5p, miR-2331-3p, miR-3957-5p, miR-30c-1-3p, miR-3154, miR-100-5p, miR-3065-3p, miR-345-3p, miR-2898, miR-30c-2-3p, miR-345-3p, miR-185-3p, miR-210-5p, miR-99a, miR-328-3p, miR-1224-5p, miR-99a-5p, miR-29d-3p, miR-5703, miR-345-

ARHGEF19 ENSOARGO(Rho guan) 3p, novel\_133, miR-361-3p, miR-24-3p, miR-29c-3p, miR-342-3p, miR-2447, miR-335-5p, miR-4726-5p, miR-29a, miR-335, miR-425-5p, miR-6402, miR-6535, miR-499a-3p, miR-29a-3p, miR-7-1-3p, miR-7977, miR-3120-3p, miR-4792, miR-20a-3p, miR-6395, miR-3963, miR-99b-5p, miR-378j, miR-30c-1-3p, miR-363-5p, miR-33a-5p, miR-2411-3p, miR-99a-5p, miR-342, miR-224-5p, miR-149-5p, miR-9788-3p, novel\_116, miR-1298-3p, miR-133b-5p, miR-4508, miR-7862, miR-744-5p, miR-29b, miR-296-5p, miR-484

miR-378i, miR-378a-3p, miR-128-3p, miR-200b-3p, miR-2285ad, miR-429-3p, miR-505-3p, miR-9-5p, miR-378h, miR-200b, miR-545-5p, miR-151-5p, miR-2284h-5p, miR-196a-3p, miR-2285af, miR-618, miR-200c, miR-6119-5p, miR-422a, miR-2284m, miR-200c-3p, miR-1277-5p, miR-543-5p, miR-21-3p, miR-200a-3p, miR-183-5p, miR-2285w, miR-369-3p, miR-3064-5p, miR-195a-3p, miR-4286, miR-3065-3p, miR-2285b, miR-192-3p, miR-21a-3p, novel\_99, miR-378a-3p, miR-660-5p, miR-548o-3p, miR-3065-3p, miR-2285aa, miR-141-3p, miR-22-3p, miR-151b, miR-154b-5p, miR-2284n, miR-2284k, miR-135a-1-3p, miR-3604, miR-409-3p, miR-378c, miR-6128, miR-3184-5p, miR-378c, miR-378b, miR-1434-3p, miR-1843b-5p, miR-197-3p, miR-22-3p, novel\_23, miR-30b-3p, miR-758-3p, miR-30b-3p, miR-378c, miR-219a-1-3p, miR-16-2-3p, miR-3120-5p, miR-330-3p, miR-133b-5p, miR-2284d, miR-412-5p, miR-9788-3p, miR-421, miR-1185-3p, miR-330-3p, miR-3085-3p, miR-2285l, miR-660, miR-466f-3p, miR-6240, let-7c-3p, miR-33a-5p, let-7f-2-3p, let-7f-2-3p, miR-378d, miR-432-3p, miR-758-3p, miR-2387, miR-216a-3p, miR-2319a, miR-9851-3p, novel\_94, miR-378f, miR-505-3p, miR-3064-5p, miR-655-5p, miR-2285u, miR-126b-5p, miR-3120-3p, miR-378e, miR-2483-3p, novel\_69, miR-3082-5p, miR-6535, miR-1185-2-3p, miR-576-3p, miR-371a-5p, miR-3968, miR-3958-3p, miR-628-3p, miR-147-5p, miR-219b-3p, miR-495-3p, miR-2284j, miR-9-5p, miR-2285x, miR-877-3p, miR-423-5p, miR-7705  
let-7a-3p, miR-34a-5p, miR-5703, miR-345-3p, miR-1290, miR-450a-1-3p, miR-1b-3p, miR-212-5p, miR-34b-5p, miR-6536, miR-216a-5p, miR-345-3p, novel\_39, miR-199a-5p, miR-486-3p, miR-1248, miR-2312, miR-3154, miR-424-3p, miR-450a-1-3p, miR-2285c, miR-22-3p, miR-199a-5p, miR-34c-5p, miR-323-5p, miR-182-5p, miR-208b-5p, miR-486b-3p, miR-450b-3p, miR-151-3p, miR-331-3p, let-7b-3p, miR-122-5p, miR-665-5p, miR-433-5p, miR-145a-3p, miR-30b-3p, miR-3432b, miR-219a-1-3p, miR-197-3p, miR-450c-3p, miR-22-3p, miR-30b-3p, miR-6529a, miR-9788-3p, miR-2285e, miR-496-5p, miR-2285g, miR-147a, miR-2300a-5p, miR-151a-3p, miR-409b, miR-199b-5p, miR-3955-3p, miR-182-5p, miR-2411-3p, novel\_103, miR-432-3p, miR-432-3p, miR-101b-3p, miR-136-5p, miR-381-3p, miR-2285ab, miR-199b-5p, miR-323a-5p, miR-3082-5p, miR-34b, miR-670-3p, miR-6123, miR-628-3p, miR-499a-5p, miR-34c, miR-101-3p, miR-449a, miR-199b-5p, miR-2284w, miR-2428, miR-361-3p, miR-2285f

GOLPH3 ENSOARGO(golgi ph3p, novel\_23, miR-30b-3p, miR-758-3p, miR-30b-3p, miR-378c, miR-219a-1-3p, miR-16-2-3p, miR-3120-5p, miR-330-3p, miR-133b-5p, miR-2284d, miR-412-5p, miR-9788-3p, miR-421, miR-1185-3p, miR-330-3p, miR-3085-3p, miR-2285l, miR-660, miR-466f-3p, miR-6240, let-7c-3p, miR-33a-5p, let-7f-2-3p, let-7f-2-3p, miR-378d, miR-432-3p, miR-758-3p, miR-2387, miR-216a-3p, miR-2319a, miR-9851-3p, novel\_94, miR-378f, miR-505-3p, miR-3064-5p, miR-655-5p, miR-2285u, miR-126b-5p, miR-3120-3p, miR-378e, miR-2483-3p, novel\_69, miR-3082-5p, miR-6535, miR-1185-2-3p, miR-576-3p, miR-371a-5p, miR-3968, miR-3958-3p, miR-628-3p, miR-147-5p, miR-219b-3p, miR-495-3p, miR-2284j, miR-9-5p, miR-2285x, miR-877-3p, miR-423-5p, miR-7705

DDX27 ENSOARGO( DEAD (As: let-7a-3p, miR-34a-5p, miR-5703, miR-345-3p, miR-1290, miR-450a-1-3p, miR-1b-3p, miR-212-5p, miR-34b-5p, miR-6536, miR-216a-5p, miR-345-3p, novel\_39, miR-199a-5p, miR-486-3p, miR-1248, miR-2312, miR-3154, miR-424-3p, miR-450a-1-3p, miR-2285c, miR-22-3p, miR-199a-5p, miR-34c-5p, miR-323-5p, miR-182-5p, miR-208b-5p, miR-486b-3p, miR-450b-3p, miR-151-3p, miR-331-3p, let-7b-3p, miR-122-5p, miR-665-5p, miR-433-5p, miR-145a-3p, miR-30b-3p, miR-3432b, miR-219a-1-3p, miR-197-3p, miR-450c-3p, miR-22-3p, miR-30b-3p, miR-6529a, miR-9788-3p, miR-2285e, miR-496-5p, miR-2285g, miR-147a, miR-2300a-5p, miR-151a-3p, miR-409b, miR-199b-5p, miR-3955-3p, miR-182-5p, miR-2411-3p, novel\_103, miR-432-3p, miR-432-3p, miR-101b-3p, miR-136-5p, miR-381-3p, miR-2285ab, miR-199b-5p, miR-323a-5p, miR-3082-5p, miR-34b, miR-670-3p, miR-6123, miR-628-3p, miR-499a-5p, miR-34c, miR-101-3p, miR-449a, miR-199b-5p, miR-2284w, miR-2428, miR-361-3p, miR-2285f

miR-501-3p, miR-345-3p, miR-378h, miR-2411-5p, miR-1271-5p, miR-339a, miR-1260a, miR-6119-5p, miR-543-5p, miR-450a-2-3p, miR-2898, miR-191-3p, miR-181a-2-3p, miR-3065-3p, miR-1957a, miR-2284a, miR-490-3p, miR-1271-3p, miR-28b, miR-671-5p, miR-615-5p, miR-3957-5p, miR-154b-5p, miR-3957, miR-34c-5p, miR-331-3p, miR-28-5p, miR-486b-3p, miR-138-5p, miR-1306-5p, miR-378c, miR-873a-5p, miR-1434-3p, miR-7862, miR-455-5p, miR-30b-3p, miR-138, miR-1260b, miR-219a-1-3p, miR-377-5p, miR-133b-5p, miR-2355-3p, miR-503-5p, miR-455-5p, miR-224-5p, miR-503-5p, miR-1343-5p, miR-125a-5p, miR-124-5p, miR-22851, miR-363-5p, miR-654-3p, miR-7975, miR-9851-3p, miR-505-3p, miR-6395, miR-1291, miR-2404, miR-323a-5p, miR-146b-3p, miR-34b, miR-34c, miR-382-5p, miR-33a-3p, miR-6402, miR-22-5p, miR-502b, miR-199c, novel\_101, miR-342-3p, novel\_120, miR-326-3p, miR-449a, miR-2428, miR-371b-3p, miR-24-3p, miR-2904, miR-188-3p, miR-1197-5p, miR-1193, miR-140-3p, miR-362-3p, miR-2408, miR-2300b-3p, miR-941, miR-3600, miR-505-3p, miR-532-3p, novel\_83, miR-383-5p, miR-185-3p, miR-125b, miR-196a-3p, miR-221-5p, miR-34b-5p, miR-299-3p, miR-466i-5p, miR-216c-5p, miR-105-3p, miR-2411, miR-125b-2-3p, miR-21a-3p, miR-3065-3p, miR-221-5p, miR-378a-3p, miR-204-3p, miR-22-3p, miR-877-5p, miR-323-5p, miR-193b-3p, miR-6130, miR-139-5p, miR-320e, miR-708-5p, miR-487a-5p, miR-664a, miR-1271, miR-3074-2-3p, miR-539-5p, miR-378c, miR-145a-3p, miR-4510, miR-338-3p, miR-6134, miR-30b-3p, miR-125b-2-3p, miR-378b, miR-296-5p, miR-4791, miR-378c, miR-222-5p, miR-409b, miR-2300a-5p, miR-9788-3p, miR-362-3p, miR-2957, miR-342, miR-326, miR-3085-3p, miR-376b, miR-2330-5p, miR-494-3p, miR-4532, miR-3187-3p, miR-129b-5p, miR-147-3p, miR-7977, miR-3064-5p, miR-10b, miR-7857-3p, miR-378e, miR-3082-5p, miR-489, miR-2285n, miR-1296-5p, miR-3050-5p, miR-541-3p, miR-502-3p, miR-1260a, miR-200c, miR-210-5p, miR-202-5p, miR-200c-3p, novel\_127, miR-195a-3p, miR-30a-3p, miR-181a-2-3p, miR-1957a, miR-29a-5p, miR-3065-3p, miR-490-3p, miR-23b-5p, miR-582-3p, miR-19b-3p, miR-105-2, miR-200b-3p, miR-18a-3p, miR-429-3p, miR-30d-3p, miR-200b, miR-222-5p, miR-532-3p, miR-486-5p, miR-30e-3p, miR-30a-3p, miR-135a-5p, miR-129-5p, miR-874-5p, miR-130b-5p, miR-2330-3p, miR-1260b, miR-346, miR-21a-3p, miR-137-3p, miR-376c-5p, let-7g-3p, miR-376c-5p, miR-140-5p, miR-21-3p, miR-3065-3p, miR-296-3p, miR-105-5p, miR-378a-5p, miR-130b-5p, miR-493-5p, miR-3187-3p, miR-296-3p, miR-1285, novel\_23, miR-1260b, miR-2284x, miR-31-5p, miR-199b-3p, miR-105-1, miR-665, miR-5010-3p, miR-222-5p, miR-411-5p, miR-6402, miR-199c, miR-3059-5p, novel\_60, miR-3956-3p, miR-6527, miR-376b-5p, miR-140-5p, miR-3591-3p, miR-18a-3p, miR-19a-3p, miR-335-3p, miR-493-5p, miR-135b-5p, miR-670-3p

miR-3959-5p, miR-300-3p, miR-133c, miR-125a, miR-370-3p, miR-329b, miR-345-5p, miR-10b-3p, miR-20b-5p, miR-23a-5p, miR-30e-5p, miR-17-5p, miR-376c-5p, miR-3154, miR-320a, miR-93-5p, miR-93, miR-16-5p, miR-28-5p, miR-370-5p, miR-29b-3p, miR-3969, miR-135a-5p, miR-6740-5p, miR-331-3p, miR-125b-5p, miR-483-3p, miR-6516-5p, miR-322-5p, novel\_121, miR-545-5p, miR-2285ad, miR-431, miR-1224-5p, let-7d, miR-330-5p, miR-29d-3p, miR-92b-3p, miR-28b, miR-1271-3p, novel\_39, miR-200a, let-7g, miR-3065-3p, miR-181a-2-3p, let-7f-5p, miR-450a-2-3p, miR-92a-3p, miR-543-5p, novel\_96, let-7c-5p, miR-30c-2-3p, miR-29a-3p, miR-320c, miR-329-5p, miR-3120-3p, miR-1291, miR-195a-5p, let-7e-5p, miR-135b-5p, miR-146b-5p, miR-2387, miR-1306, miR-371b-3p, miR-24-3p, miR-2284w, miR-326-3p, miR-335-5p, miR-342-3p, miR-29c-3p, novel\_101, miR-495-3p, miR-1193, miR-3957-3p, miR-29a, miR-92a-3p, miR-199c, miR-147-5p, miR-656-5p, miR-28c, miR-20a-5p, miR-15a, miR-3613, let-7i, miR-16a, miR-185-5p, miR-134-3p, let-7g-5p, miR-20b, miR-3955-5p, miR-16b, miR-29b, miR-30b-3p, miR-188-5p, miR-27b-3p, miR-497-5p, miR-1843b-5p, miR-7b-5p, miR-145a-5p, miR-432-3p, miR-432-3p, miR-345-5p, miR-296-3p, miR-6412, miR-6240, miR-493-5p, miR-130b-5p, miR-363-5p, miR-483-3p, miR-125a-5p, miR-660, miR-296-3p, miR-146a, miR-7-5p, miR-224-5p, miR-106a-5p, novel\_51, miR-17-5p, miR-197-5p, miR-32, miR-330-3p, miR-216b-5p, miR-499b-3p, miR-6516, miR-27a-5p, miR-15b-5p, let-7i-5p, miR-204-3p, miR-660-5p, miR-30c-1-3p, miR-504-5p, miR-32-5p, miR-296-3p, miR-370-5p, miR-3065-3p, miR-345-5p, miR-625-5p, miR-3613-5p, miR-224-5p, miR-6525, miR-6134, miR-338-3p, let-7b-5p, miR-539-5p, let-7b, miR-130b-5p, miR-708-5p, miR-424-5p, miR-2285j, let-7f, miR-320e, miR-665, miR-15a-5p, novel\_83, miR-532-3p, miR-2284h-5p, miR-106a, miR-33b-3p, miR-4429, miR-493-3p, miR-378d, miR-148a-

miR-450c-3p, miR-19b-2-5p, miR-432, miR-7b-5p, miR-497-5p, miR-188-5p, miR-16b, miR-16-1-3p, miR-340-3p, miR-31-5p, miR-149-5p, miR-412-5p, miR-134-3p, miR-3431, miR-7-5p, miR-377-3p, miR-146a, miR-378a-5p, let-7f-2-3p, miR-628-5p, let-7f-2-3p, miR-432-3p, miR-432-3p, miR-1306, miR-3591-3p, miR-146b-5p, let-7e-5p, miR-2284e, novel\_68, miR-677, miR-181b-3p, miR-374c-3p, miR-485-3p, miR-142b, miR-421-5p, miR-1a-1-5p, miR-199b-5p, miR-1343-5p, miR-330-5p, miR-412, miR-2285ad, miR-450a-1-3p, novel\_121, miR-486-5p, miR-322-5p, miR-3071-3p, miR-205-5p, miR-1a-2-5p, let-7f-5p, miR-29a-5p, let-7g, miR-200a, miR-23b, miR-876-3p, miR-345-5p, miR-2285aa, miR-542-5p, miR-223-5p, miR-2433, novel\_63, miR-193a-5p, miR-16-5p, miR-541, miR-1839-5p, miR-1388-5p, miR-181b-2-3p, miR-145b, miR-1343-3p, miR-1185-3p, miR-126a-5p, miR-539-5p, miR-376b-3p, miR-1298-3p, miR-182-5p, miR-16b, miR-199b-5p, miR-146b, miR-103a-2-5p, miR-1185-5p, miR-23a-3p, miR-335-3p, miR-9-3p, miR-3963, miR-504, miR-139-5p, miR-203-3p, miR-1185-2-3p, miR-499a-3p, miR-378g, miR-218-5p, miR-3968, miR-2447, miR-7705, miR-361-3p, miR-877-3p, novel\_111, miR-217-5p, miR-1961, miR-193b-5p, miR-16-1-3p, miR-361-5p, miR-493-3p, miR-30d-3p, miR-1247-5p, miR-2284h-5p, miR-23b-3p, miR-23c, miR-219b-5p, miR-92a-1-5p, miR-618, miR-3653-3p, miR-2484, let-7k, miR-98-5p, miR-2285w, miR-143-3p, miR-421-5p, miR-376a-5p, miR-450a-1-3p, miR-186-5p, miR-345-5p, miR-296-3p, miR-504-5p, miR-2331-3p, miR-30c-1-3p, miR-548o-3p, let-7i-5p, miR-15b-5p, miR-499b-3p, miR-377-3p, miR-582-5p, miR-30a-3p, let-7f, miR-15b-3p, miR-30e-3p, miR-129-5p, miR-4492, miR-874-5p, novel\_74, let-7b, miR-6525, miR-374b-3p, miR-145a-5p, miR-30b-3p, miR-219a-1-3p, miR-133b-5p, miR-2355-3p, miR-544b, miR-432-5p, let-7g-5p, miR-1343-5p, miR-124-5p, miR-2285l, miR-363-5p, miR-345-5p, miR-376b-3p, miR-378b, miR-

miR-88b-5p, miR-194b-5p, miR-2284j, miR-181d-5p, novel\_111, miR-301a-5p, miR-628-3p, miR-374a-3p, miR-2284q, miR-664b, miR-20a-3p, miR-374b-5p, miR-3082-5p, let-7d-5p, miR-140-5p, miR-378j, miR-96-5p, miR-493-5p, let-7a-5p, miR-1388-3p, miR-424-5p, miR-23a-3p, miR-33a-5p, miR-8485, miR-2957, miR-16b, miR-146b, miR-153-3p, let-7e, miR-548w, miR-153, miR-142-3p, miR-147a, miR-376b-3p, miR-1298-3p, miR-148b-5p, miR-421, miR-484, miR-301b-5p, miR-1388-5p, miR-101a-5p, miR-1839-5p, miR-2284aa, miR-3120-5p, let-7b, miR-3074-5p, miR-3958-5p, miR-1271, let-7b-5p, let-7f, miR-2285j, miR-655-3p, miR-29b-2-5p, miR-3604, novel\_74, miR-874-5p, miR-424-5p, miR-130b-5p, miR-140-5p, miR-221-5p, miR-548o-3p, miR-582-5p, miR-216b-5p, novel\_25, let-7i-5p, miR-15b-5p, miR-433-3p, miR-655, miR-345-5p, miR-18a-5p, miR-582-5p, miR-186-5p, miR-2285w, miR-369-3p, miR-376a-5p, miR-664b-3p, miR-142a-3p, miR-146a-5p, miR-374a-5p, miR-216a-5p, miR-2284m, miR-466i-5p, miR-98-5p, miR-221-5p, let-7k, miR-548e-3p, miR-7859, miR-487a-3p, miR-23b-3p, miR-383-5p, miR-23c, miR-200b, miR-15a-5p, miR-376a-5p, miR-1961, miR-217-5p, miR-218-1-3p, miR-361-5p, miR-148a-5p, novel\_101, miR-323c, miR-15a, miR-142b, miR-16a, let-7i, novel\_1, miR-3074-5p, miR-7-1-3p, miR-18b, miR-3065-5p, miR-410-5p, miR-146b-5p, miR-376a-2-5p, miR-195a-5p, let-7e-5p, miR-130b-5p, miR-345-5p, miR-146a, miR-194a, miR-196b-5p, miR-452-5p, miR-466f-3p, miR-2284d, let-7g-5p, novel\_116, miR-1843b-5p, miR-542-3p, miR-223-3p, miR-194-5p, miR-3071-5p, miR-16b, miR-2284ab, miR-497-5p, miR-374b, miR-2284v, miR-16-5p, miR-374a-3p, miR-1197-3p, miR-2332, miR-409-3p, miR-134-5p, miR-503-3p, miR-370-3p, miR-300-3p, miR-365a-3p, miR-381-3p, miR-488-3p, miR-503-3p, miR-18a, miR-3154, miR-23b, miR-10b-3p, miR-345-5p, miR-23a-5p, miR-1248, miR-3529-3p, miR-29b-2-5p, let-

miR-33a-5p, miR-424-5p, miR-848b, miR-491-3p, miR-30c-1-3p, miR-29b-1-5p, miR-16b, miR-1306-5p, miR-214-3p, miR-330-3p, miR-9788-3p, miR-1185-3p, miR-539-5p, miR-1839-5p, miR-2426, miR-544a, miR-2447, miR-1285-5p, miR-877-3p, miR-30b-5p, miR-3964, miR-499a-5p, miR-7689-3p, miR-211-5p, miR-139-5p, miR-20a-3p, miR-203-3p, miR-1185-2-3p, miR-499a-3p, miR-3082-5p, miR-378j, miR-381-3p, miR-493-5p, miR-329a-5p, miR-2285w, miR-486-3p, miR-29b-1-5p, miR-216a-5p, miR-219b-5p, miR-30b, miR-2285p, miR-21-3p, miR-2484, miR-760-3p, miR-485-3p, miR-548e-3p, miR-2284h-5p, miR-7859, miR-383-5p, miR-15a-5p, miR-98-3p, miR-2904, miR-217-5p, miR-1197-5p, miR-30c-5p, miR-1246, let-7a-3p, miR-361-5p, miR-19b-3p, miR-214, miR-2330-3p, miR-3184-3p, miR-6134, miR-98-3p, miR-15b-3p, let-7b-3p, miR-208b-5p, miR-424-5p, miR-450b-3p, miR-21-3p, miR-30c-1-3p, miR-496-3p, miR-1277-3p, miR-204-3p, miR-877-5p, miR-544-3p, miR-499b-3p, miR-139-5p, miR-216b-5p, miR-129b-3p, miR-30d-5p, let-7f-1-3p, miR-450a-1-3p, novel\_99, miR-30f, miR-2483-5p, let-7f-2-3p, let-7f-2-3p, miR-493-5p, miR-6240, miR-539-3p, miR-330-3p, novel\_51, miR-31-5p, miR-133b-5p, miR-103a-3p, novel\_116, miR-544b, miR-103, miR-450c-3p, miR-374b-3p, miR-653, miR-708-3p, miR-497-5p, miR-2284x, miR-16b, miR-3432b, miR-2285x, miR-211, miR-485-3p, miR-16a, miR-15a, miR-147-5p, miR-502b, miR-6119-3p, miR-379-3p, novel\_1, miR-655-5p, miR-329-5p, miR-670-3p, miR-374c-3p, miR-1306, miR-3065-5p, miR-3591-3p, miR-2387, miR-195a-5p, miR-379-5p, miR-107, miR-19a-3p, miR-200a, miR-2285b, miR-3071-3p, miR-30c-2-3p, miR-217, miR-107, miR-200a-3p, miR-28-3p, miR-582-3p, miR-450a-1-3p, novel\_121, miR-505-5p, miR-322-5p, miR-30a-5p, miR-3578, miR-1290, miR-30c, miR-496, miR-411-3p, miR-300, miR-16-5p, miR-28a-3p, miR-6740-5p, miR-409-3p, miR-486b-3p, miR-374b-3p, miR-204-5p, miR-2285aa, miR-141-

FLT3      ENSOARGO(fms-rela

miR-30f, miR-154b-3p, let-7g-3p, novel\_99, let-7f-1-3p, miR-27b-5p, miR-6130, miR-6516, miR-544-3p, novel\_25, miR-664a, miR-17-3p, miR-487a-5p, miR-708-5p, miR-338-5p, miR-320e, miR-324-3p, miR-10b-5p, miR-6134, let-7b-5p, miR-145a-3p, miR-4510, miR-539-5p, miR-4429, miR-378d, miR-376a-5p, miR-2300b-3p, miR-1246, miR-126-3p, miR-5703, miR-1197-5p, miR-188-3p, miR-2904, miR-532-3p, miR-548e-3p, miR-3600, miR-760-3p, miR-2284m, miR-106a, miR-320d, miR-21-3p, miR-34b-5p, miR-125b, miR-216c-5p, miR-20a, let-7d-5p, miR-10b, miR-20a-3p, miR-3064-5p, miR-7977, miR-541-5p, miR-3958-3p, miR-4726-5p, miR-30b-5p, miR-382-3p, miR-362-5p, miR-8095, miR-541-3p, miR-3059-5p, miR-452-5p, miR-181d-5p, miR-2426, miR-101a-5p, miR-544a, miR-16-2-3p, miR-10b, miR-4791, miR-6529a, miR-30b-3p, miR-2285e, miR-500-5p, miR-409b, miR-2300a-5p, miR-222-5p, miR-25-5p, miR-3085-3p, let-7e, miR-

SLC37A4 ENSOARGO(solute carrier) 2285o, novel\_103, miR-5126, miR-1306-5p, miR-326, miR-320b, miR-30c-1-3p, miR-758-3p, miR-193a, miR-106a-5p, let-7a-5p, miR-33a-5p, let-7c-3p, miR-485-5p, miR-376c-5p, miR-7144-5p, miR-2448-3p, miR-17-5p, miR-320a, miR-362-5p, miR-3154, miR-365a-3p, miR-34c-5p, miR-370-3p, miR-138-5p, miR-28-5p, miR-1306-3p, miR-409-3p, miR-93, miR-500b-5p, miR-365a-5p, miR-6128, let-7d, miR-10a-5p, miR-3578, miR-483-3p, miR-6516-5p, miR-376a-5p, miR-196a-2-3p, miR-191-3p, miR-181b-5p, miR-17-3p, miR-92a-3p, miR-107, miR-1260a, miR-217, miR-339a, let-7c-5p, miR-30c-2-3p, miR-380-5p, miR-490-3p, miR-181a-2-3p, miR-107, miR-1291, miR-376a-2-5p, miR-7975, miR-2387, miR-34b, miR-670-3p, miR-2404, miR-10a-5p, miR-7-1-3p, miR-320b, novel\_1, miR-92a-3p, miR-128-1-5p, miR-502b, miR-133a-5p, miR-6402, miR-20a-5p, let-7i, miR-382-5p, miR-34c, miR-1307-3p, miR-2428, miR-449a, miR-326-3p, miR-17-3p, miR-1260b, miR-30b-3p, miR-138, miR-2284ab, miR-786g, miR-487b-5p, miR-331-5p, miR-134-5p, miR-374b-3p, miR-204-5p, miR-190a-5p, miR-2332, novel\_63, miR-665, miR-219b-3p, miR-374a-3p, miR-145a-3p, miR-425-5p, miR-1271, miR-329a, let-7g-3p, miR-1827, miR-625-5p, miR-2285c, miR-331-5p, miR-374c-3p, miR-192-5p, miR-548o-3p, miR-3068-3p, miR-487a-3p, miR-532-5p, miR-215-5p, miR-1a-2-5p, miR-210-5p, miR-219-3p, miR-2285p, miR-2411, miR-487a, miR-300, miR-411-3p, miR-378d, miR-148a-5p, miR-362-3p, miR-134, miR-215-5p, miR-5703, miR-758-5p, miR-1271-5p, miR-2411-5p, miR-505-5p, novel\_121, miR-134-5p, miR-505-3p, novel\_1, miR-628-3p, miR-154-3p, miR-22-5p, miR-4324, miR-211, miR-219a-2-3p, miR-190b-5p, miR-96-5p, miR-544-5p, miR-505-3p, miR-493-5p, miR-3065-5p, miR-150-5p, miR-374c-3p, miR-3082-5p, miR-7857-3p, miR-2319b, miR-4792, miR-211-5p, miR-7-1-3p, miR-190a, miR-362-3p, miR-330-3p, miR-758-3p, miR-8485, let-7j, miR-3187-3p, miR-6240, miR-493-5p, miR-219a-1-3p, miR-362-3p, miR-1434-3p, miR-542-3p, miR-329-3p, miR-758-3p, novel\_23, miR-374b-3p, miR-125b-2-3p, miR-539-5p, miR-2285g, miR-2285e, novel\_116, miR-148b-5p, miR-330-3p, novel\_78, miR-3955-5p

KLHL7

ENSOARGO(kelch-like)



|          |                   |                                                                                                                                                                                                                                                                                                                                                                                                                                                                                                                                                                                                                                                                                                                                                                                                                                                                                                                                                                                                                                                                                                                                                                                                                                                                                                                                                                                                                                                                                                                                                                                                                                                                                                                                                                                                                                                                                               |
|----------|-------------------|-----------------------------------------------------------------------------------------------------------------------------------------------------------------------------------------------------------------------------------------------------------------------------------------------------------------------------------------------------------------------------------------------------------------------------------------------------------------------------------------------------------------------------------------------------------------------------------------------------------------------------------------------------------------------------------------------------------------------------------------------------------------------------------------------------------------------------------------------------------------------------------------------------------------------------------------------------------------------------------------------------------------------------------------------------------------------------------------------------------------------------------------------------------------------------------------------------------------------------------------------------------------------------------------------------------------------------------------------------------------------------------------------------------------------------------------------------------------------------------------------------------------------------------------------------------------------------------------------------------------------------------------------------------------------------------------------------------------------------------------------------------------------------------------------------------------------------------------------------------------------------------------------|
|          |                   | miR-320a, miR-411, miR-487b-5p, miR-378j, miR-625-5p, novel_94, miR-6395, miR-485-5p, miR-181a-3p, miR-1291, miR-2331-3p, miR-6535, miR-320c, miR-4443, miR-34c-5p, miR-3596, miR-378g, miR-34b, miR-34c, miR-502-5p, miR-135a-1-3p, miR-494-5p, miR-2440, miR-874-5p, miR-134-5p, miR-374b-3p, miR-486b-3p, miR-664a, miR-335, miR-487b-5p, miR-335-5p, miR-181c-3p, miR-3184-5p, miR-449a, miR-365a-5p, miR-423-5p, miR-877-3p, miR-374a-3p, miR-134, miR-34a-5p, miR-4429, miR-31-5p, miR-134-5p, miR-328-3p, miR-134-3p, miR-365b-5p, miR-185-3p, miR-320b, miR-34b-5p, miR-2898, miR-320d, miR-486-3p, miR-193a, miR-1b-5p                                                                                                                                                                                                                                                                                                                                                                                                                                                                                                                                                                                                                                                                                                                                                                                                                                                                                                                                                                                                                                                                                                                                                                                                                                                               |
| SRPR     | ENSOARGO(signal r |                                                                                                                                                                                                                                                                                                                                                                                                                                                                                                                                                                                                                                                                                                                                                                                                                                                                                                                                                                                                                                                                                                                                                                                                                                                                                                                                                                                                                                                                                                                                                                                                                                                                                                                                                                                                                                                                                               |
| MBNL3    | ENSOARGO(musclebl | miR-185-5p, miR-664b, miR-664-3p, miR-2319b, miR-1843b-5p, miR-133a-5p, miR-5010-3p                                                                                                                                                                                                                                                                                                                                                                                                                                                                                                                                                                                                                                                                                                                                                                                                                                                                                                                                                                                                                                                                                                                                                                                                                                                                                                                                                                                                                                                                                                                                                                                                                                                                                                                                                                                                           |
| CASP8AP2 | ENSOARGO(caspase  | miR-4792, miR-18a-3p, miR-548e-3p, miR-7859, novel_25, miR-873a-5p, miR-18a-3p, miR-582-3p, miR-136-5p, miR-17-3p, miR-219a-2-3p, miR-219-3p, miR-133a-5p, miR-100-3p, miR-219b-3p, miR-105-5p, miR-17-3p, miR-17-3p, miR-499a-5p, novel_127                                                                                                                                                                                                                                                                                                                                                                                                                                                                                                                                                                                                                                                                                                                                                                                                                                                                                                                                                                                                                                                                                                                                                                                                                                                                                                                                                                                                                                                                                                                                                                                                                                                  |
| CD300E   | ENSOARGO(CD300e m | miR-493-3p, miR-450b-3p, miR-18a-3p, miR-204-3p, miR-18a-3p, miR-378b, miR-874-3p, miR-6517, miR-1343-3p, miR-2285t, novel_127, novel_51, miR-1247-3p, miR-361-3p, miR-371b-3p, miR-2447, miR-145a-3p                                                                                                                                                                                                                                                                                                                                                                                                                                                                                                                                                                                                                                                                                                                                                                                                                                                                                                                                                                                                                                                                                                                                                                                                                                                                                                                                                                                                                                                                                                                                                                                                                                                                                         |
|          |                   | miR-421-5p, miR-20a, miR-2284m, miR-106a, miR-320d, miR-26a-5p, miR-196a-3p, miR-15a-5p, miR-23c, miR-7859, miR-23b-3p, miR-106a, miR-548e-3p, miR-18a-3p, miR-4429, let-7a-3p, miR-218-1-3p, miR-362-3p, miR-217-5p, miR-188-3p, miR-98-3p, novel_44, miR-98-3p, miR-10b-5p, miR-6134, miR-4510, miR-130b-5p, miR-424-5p, let-7b-3p, miR-338-5p, miR-6130, miR-10a, miR-15b-5p, miR-32-5p, miR-504-5p, miR-532-5p, miR-182-5p, miR-18a-5p, let-7g-3p, miR-1827, let-7f-1-3p, miR-3187-3p, miR-494-3p, miR-106a-5p, miR-424-5p, miR-652-5p, miR-23a-3p, let-7c-3p, miR-199b-5p, miR-320b, miR-106b-5p, miR-16b, miR-182-5p, miR-362-3p, miR-505, miR-147a, miR-216a-3p, miR-1343-3p, miR-330-3p, miR-27a-3p, miR-362-3p, miR-10b, miR-301b-5p, miR-2284r, miR-329-3p, miR-30b-3p, miR-7705, miR-363-3p, miR-3956-3p, novel_60, miR-2284j, miR-4726-5p, miR-615, miR-301a-5p, miR-371a-5p, miR-25, miR-27a-3p, miR-20a-3p, miR-10b, miR-504, miR-147-3p, novel_94, miR-493-5p, miR-199b-5p, miR-378j, miR-92b-3p, miR-2285b, miR-1271-3p, miR-200a, miR-199a-5p, miR-92a-3p, novel_127, miR-217, miR-758-5p, miR-322-5p, miR-486-5p, miR-18b-5p, miR-411-3p, let-7a-2-3p, miR-10a-5p, miR-128-3p, miR-615-3p, miR-93, miR-145-3p, miR-2284v, miR-16-5p, miR-2284k, miR-25-3p, miR-374c-3p, miR-300-3p, miR-199a-5p, miR-874-3p, let-7g-3p, miR-329a, miR-10b-3p, miR-1248, miR-20b-5p, miR-320a, miR-18a, miR-23b, miR-17-5p, miR-93-5p, miR-432-3p, miR-2285r, miR-654-3p, let-7a-2-3p, miR-493-5p, miR-6240, miR-130b-5p, miR-378a-5p, miR-124-5p, miR-7-5p, miR-106a-5p, miR-17-5p, miR-330-3p, miR-20b, miR-149-5p, miR-31-5p, miR-2284ab, miR-30b-3p, miR-16b, miR-27b-3p, miR-2284x, miR-497-5p, miR-1843b-5p, miR-7b-5p, miR-1434-3p, miR-873a-5p, novel_23, miR-199b-5p, miR-2285x, novel_1, miR-379-3p, miR-92a-3p, miR-147-5p, miR-421-5p, miR-576-3p, miR-20a-5p, miR-15a, miR-33a- |
| HUS1     | ENSOARGO(HUS1 che |                                                                                                                                                                                                                                                                                                                                                                                                                                                                                                                                                                                                                                                                                                                                                                                                                                                                                                                                                                                                                                                                                                                                                                                                                                                                                                                                                                                                                                                                                                                                                                                                                                                                                                                                                                                                                                                                                               |

miR-3071-3p, miR-205-5p, miR-3064-5p, miR-192-3p, miR-2284y, miR-200a, miR-29a-5p, novel\_39, miR-450b-5p, miR-148b-5p, miR-330-5p, miR-2427, miR-1343-5p, miR-3591-5p, miR-155-5p, miR-30c, miR-431, miR-412, miR-1224-5p, miR-429-3p, novel\_121, miR-9-5p, miR-505-5p, miR-6740-5p, novel\_63, miR-191-5p, miR-193a-5p, miR-137-3p, miR-301, miR-424-3p, miR-30e-5p, miR-1248, miR-345-5p, miR-767, miR-1271, miR-542-5p, miR-2285aa, miR-133c, miR-223-5p, miR-331-5p, miR-2411-3p, miR-194a, miR-365b-5p, let-7f-2-3p, let-7f-2-3p, miR-668-3p, miR-6240, miR-493-5p, miR-503-3p, let-7a-2-3p, miR-432-3p, miR-432-3p, miR-450c-3p, miR-22-3p, miR-1843b-5p, miR-2284x, miR-26a-2-3p, miR-3955-5p, novel\_116, miR-28c, miR-421-5p, miR-379-3p, miR-29a, miR-6119-3p, miR-29c-3p, miR-3065-5p, miR-150-5p, miR-412-3p, miR-3120-3p, miR-216b-3p, novel\_68, miR-677, miR-411b-3p, miR-345-3p, novel\_17, miR-210-5p, miR-30b, miR-345-3p, miR-487a, miR-143-3p, miR-376a-5p, miR-421-5p, miR-217-5p, miR-1434-5p, miR-191, miR-30c-5p, miR-148a-5p, miR-34a-5p, novel\_73, miR-30d-3p, miR-7859, miR-665, miR-30a-3p, miR-30e-3p, miR-2285j, miR-130b-5p, miR-1468-5p, miR-3184-3p, miR-433-5p, miR-3184-5p, miR-411, miR-30d-5p, miR-299, miR-186-5p, miR-1827, miR-345-5p, miR-548o-3p, miR-504-5p, miR-505, miR-323b-3p, miR-431-5p, miR-103a-2-5p, miR-1185-5p, miR-2310, miR-323b, miR-301b-5p, miR-1839-5p, miR-145b, miR-330-3p, miR-548w, miR-126a-5p, miR-148b-5p, miR-301a-5p, miR-218-5p, miR-3964, miR-9-5p, miR-3956-3p, miR-2447, miR-423-5p, miR-1983, miR-493-5p, miR-335-3p, miR-504, miR-136-5p, miR-126b-5p, miR-7689-3p, miR-2285u, miR-2319b, miR-4443, miR-203-3p, miR-2483-3p, miR-25, miR-217, miR-200c, miR-200c-3p, miR-450a-2-3p, miR-30a-3p, miR-2284a, miR-3065-3p, miR-28b, miR-30a-5p, miR-29d-3p, miR-345-3p, let-7a-2-3p, miR-200b-3p, miR-582-3p, miR-411-3p, miR-30b, miR-30b-5p, miR-133a-5p, miR-30f, miR-29b-2-5p, miR-4726-5p, miR-30d, miR-29b-2-5p, miR-193a-5p, miR-665-5p, miR-500b-5p, miR-362-5p, miR-24-3p, miR-361-3p, miR-30c-5p, miR-30e-5p, miR-30a-5p, miR-362-5p, miR-140-3p, miR-30d-5p, miR-30c, miR-7144-5p, miR-2355-5p, miR-2483-3p, miR-669, miR-500-5p, miR-345-3p, let-7e-3p, miR-345-3p, miR-455-5p, miR-2411-3p, miR-148b-5p, miR-455-5p

VPS13A ENSOARGO( vacuolar

CDX2 ENSOARGO( caudal t

TCN1 ENSOARGO( transcob

miR-487a-5p, miR-208b-5p, miR-708-5p, miR-664a, miR-29b-2-5p, miR-320e, miR-338-3p, miR-378c, miR-145a-3p, miR-2312, miR-30f, novel\_32, miR-6516, miR-193b-3p, miR-532-5p, miR-140-5p, miR-378a-3p, miR-30d, miR-299-3p, miR-320d, miR-106a, miR-466i-5p, miR-196a-3p, miR-29b-1-5p, miR-20a, miR-378d, miR-4429, miR-19b-3p, miR-124-3p, miR-1197-5p, miR-5703, miR-199a-3p, novel\_83, miR-4726-5p, miR-335, miR-30b-5p, miR-2285n, miR-2285f, miR-219a-5p, novel\_60, miR-369-5p, miR-129b-5p, miR-361-3p, miR-378e, miR-3082-5p, miR-3064-5p, miR-3085-3p, miR-320b, novel\_103, miR-326, miR-30c-1-3p, miR-376b, miR-106a-5p, miR-3120-5p, miR-378c, miR-2426, miR-450b-5p, miR-412-3p, miR-30b-3p, miR-378b, miR-216a-3p, miR-2285e, miR-2300a-5p, miR-28-5p, miR-486b-3p, miR-138-5p, miR-767-5p, miR-29b-3p, miR-410-5p, miR-5100, miR-378c, miR-365a-5p, miR-93, miR-6128, miR-1306-5p, miR-3074-1-3p, miR-671-5p, miR-10b-3p, miR-320a, miR-17-5p, miR-3154, miR-488-3p, miR-370-3p, miR-107, miR-543-5p, miR-2898, miR-450a-2-3p, miR-191-3p, miR-30c-2-3p, miR-217, miR-2285af, miR-376b-5p, miR-376c-5p, miR-490-3p, miR-28b, miR-29b-2-5p, miR-4286, miR-29d-3p, miR-30a-5p, miR-345-3p, miR-582-3p, miR-378h, miR-6516-5p, miR-203b-5p, miR-147-5p, miR-20a-5p, novel\_27, miR-326-3p, miR-2428, miR-24-3p, novel\_101, miR-219b-3p, miR-9851-3p, miR-379-5p, miR-6395, miR-1291, miR-19a-3p, miR-107, miR-18a-3p, miR-378b, miR-2285ab, miR-2387, miR-2404, miR-29a-3p, miR-320b, miR-378b, miR-197-5p, miR-17-5p, miR-106a-5p, miR-296-3p, miR-654-3p, miR-363-5p, miR-130b-5p, miR-744-5p, miR-138, miR-30b-3p, miR-29b, miR-219a-1-3p, miR-374b-3p, miR-20b, miR-103, miR-2285g, miR-130a-3p, miR-665, miR-454-3p, miR-129-5p, miR-130b-5p, miR-451a, miR-664a-5p, miR-2285j, miR-3184-5p, miR-6525, miR-346, miR-665-5p, miR-3074-5p, miR-885-3p, miR-625-5p, miR-30d-5p, miR-2285c, miR-301a-3p, miR-216b-5p, miR-125a-3p, miR-664-3p, miR-542-5p, miR-2285af, miR-125b, miR-422a, miR-450a-2-3p, novel\_96, miR-200a-3p, miR-2285w, miR-29b-2-5p, miR-30a-3p, miR-380-5p, miR-421-5p, miR-200a, miR-378i, miR-378a-3p, miR-23b-5p, miR-140-3p, miR-124-3p, miR-885-3p, miR-105-2, miR-30d-3p, miR-378h, miR-483-3p, miR-1271-5p, miR-222-5p, miR-9-5p, miR-2284h-5p, miR-30e-3p, novel\_63, miR-29b-2-5p, miR-125b-5p, miR-30a-3p, miR-1468-5p, miR-3074-5p, novel\_42, miR-378c, miR-1271, miR-3607-3p, miR-1197-3p, miR-378c, miR-2448-3p, miR-876-3p, miR-1827, miR-1814c, miR-23a-5p, miR-885-3p, miR-874-3p, miR-378a-3p, miR-125a, miR-141-3p, miR-542-5p, miR-370-3p, miR-365a-3p, miR-499b-3p, miR-22-3p, miR-105-5p, miR-483-3p, miR-491-5p, miR-1185-5p, miR-1468, miR-542-5p, miR-125a-5p, miR-124a, miR-380-5p, miR-378d, miR-2310, miR-143-5p, miR-873a-5p, miR-378b, miR-22-3p, miR-378c, miR-1388-5p, miR-1839-5p, novel\_78, miR-105-1, miR-134-3p, miR-2284q, miR-3956-3p, novel\_60, miR-542-5p, miR-9-5p, miR-361-3p, miR-2284w, miR-96-5p, miR-378f, miR-9851-3p, miR-3074-5p, miR-664b, miR-3120-3p, miR-7689-3p, miR-499a-3p, miR-25, miR-378e, miR-378g

miR-598-3p, miR-320a, miR-655, miR-503-3p, miR-424-3p, miR-625-5p, miR-543-3p, miR-10b-3p, miR-876-3p, miR-598-3p, miR-370-3p, miR-1271, miR-140-5p, miR-574-5p, miR-374c-3p, miR-544-3p, miR-193b-3p, miR-6740-5p, miR-144, miR-151-3p, miR-26c, miR-29b-2-5p, miR-409-3p, miR-135a-1-3p, miR-4492, miR-669a-3p, miR-17-3p, miR-1271, miR-3074-2-3p, miR-214, miR-374b, miR-1343-5p, miR-345-3p, miR-193b-5p, miR-4429, miR-328-3p, miR-23c, miR-345-3p, miR-26a-5p, miR-374a-5p, miR-2397-5p, miR-17-3p, miR-320d, miR-2898, miR-29b-2-5p, miR-143-3p, miR-490-3p, miR-2285b, miR-376a-5p, miR-150-5p, miR-378j, miR-6395, miR-96-5p, miR-1291, miR-374b-5p, miR-499b-5p, miR-126b-5p, miR-26b-5p, miR-7977, miR-203-3p, miR-144-3p, miR-320c, miR-6535, miR-27a-3p, miR-22-5p, miR-203b-5p, novel\_1, miR-193b-3p, miR-2285x, miR-17-3p, miR-374c-5p, miR-374b-3p, miR-3071-5p, miR-223-3p, miR-7b-5p, miR-542-3p, miR-27b-3p, miR-16-1-3p, miR-544a, miR-27a-3p, miR-340-3p, miR-151a-3p, miR-133b-5p, miR-149-5p, miR-544b, miR-2411-3p, miR-320b, miR-7-5p, novel\_103, miR-1343-5p, miR-193a-3p, miR-214-3p, miR-628-5p, miR-494-3p, miR-18a, miR-23b, miR-17-5p, miR-320a, miR-93-5p, miR-10b-3p, miR-671-5p, miR-20b-5p, miR-574-5p, miR-125a, miR-1271, miR-370-3p, miR-3959-5p, miR-34c-5p, miR-154b-5p, miR-135a-1-3p, miR-1306-3p, miR-2332, miR-100-3p, miR-125b-5p, miR-374b-3p, miR-204-5p, miR-133a-3p, miR-193a-5p, miR-6128, miR-374a-3p, miR-93, miR-378c, miR-1290, miR-330-5p, miR-582-3p, let-7a-2-3p, miR-105-2, miR-299a-3p, miR-18b-5p, miR-1224-5p, miR-7641, miR-378h, miR-483-3p, miR-505-5p, novel\_121, miR-6119-5p, miR-2285af, miR-127-5p, miR-17-3p, miR-152-3p, miR-543-5p, miR-3529-3p, miR-4286, miR-3956-5p, miR-2285b, novel\_39, miR-18b, miR-148a-3p, miR-2387, miR-2285ab, miR-3065-5p, miR-378b, miR-1306, miR-1291, miR-378f, miR-505-3p, miR-7975, novel\_68, miR-3120-3p, miR-34b, miR-299b-3p, miR-670-3p, miR-181b-3p, miR-669, miR-320c, miR-677, miR-6535, miR-20a-5p, miR-4324, miR-1247-3p, miR-34c, miR-22-5p, miR-342-3p, miR-17-3p, miR-211, miR-301b-3p, miR-449a, miR-326-3p, miR-1285, miR-7b-5p, miR-1843b-5p, miR-432, miR-374b-3p, miR-22-3p, miR-219a-1-3p, miR-380-3p, miR-27b-3p, miR-188-5p, miR-7862, miR-340-3p, miR-377-5p, miR-130a-3p, miR-185-5p, miR-2285g, miR-432-5p, miR-20b, miR-149-5p, novel\_116, miR-411-5p, miR-194-3p, miR-224-5p, miR-7-5p, miR-106a-5p, novel\_51, miR-17-5p, miR-105-5p, miR-483-3p, miR-125a-5p, miR-2483-5p, miR-363-5p, miR-432-3p, miR-432-3p, let-7a-2-3p, miR-2285c, miR-21a-3p, miR-433-3p, miR-500a-3p, miR-129b-3p, miR-18a-5p, miR-2312, miR-133b-3p, miR-625-5p, miR-32-3p, miR-5480-3p, miR-2331-3p, miR-221-5p, miR-378a-3p, miR-552-3p, miR-182-5p, miR-532-5p, miR-216b-3p, miR-6130, miR-301a-3p, miR-204-3p, miR-22-3p, miR-2285j, miR-665, miR-324-3p, miR-17-3p, novel\_74, miR-4492, miR-500, miR-208b-5p, miR-454-3p, miR-4510, miR-3184-3p, miR-378c, miR-2330-3p, miR-214, miR-665-5p, miR-224-5p, miR-

LNX2 ENSOARGO(ligand) o

ZNFx1 ENSOARGO(zinc fin)

miR-6402, miR-133a-5p, miR-15a, novel\_63, miR-16a, miR-34c, novel\_74, miR-499a-5p, miR-424-5p, miR-28a-3p, miR-590-3p, miR-16-5p, miR-1839-3p, miR-346, miR-7705, miR-449a, novel\_27, miR-488-3p, miR-411, miR-329a, miR-1248, miR-195a-5p, miR-574-5p, miR-215-5p, miR-216b-3p, miR-34b, miR-216b-5p, miR-34c-5p, miR-499b-3p, miR-499a-3p, miR-192-5p, miR-15b-5p, novel\_25, miR-2285p, miR-16b, miR-216a-5p, miR-330-3p, miR-362-3p, miR-28-3p, miR-483-3p, miR-21-3p, miR-34b-5p, miR-1839-3p, miR-424-5p, miR-6240, miR-362-3p, miR-1290, miR-215-5p, miR-329-3p, miR-582-3p, miR-16b, miR-362-3p, miR-34a-5p, miR-361-5p, miR-3120-5p, miR-497-5p, miR-330-3p, miR-3600, miR-483-3p, miR-15a-5p, miR-322-5p, miR-545-5p, miR-323b, miR-6529a, miR-378b, miR-1388-5p, miR-378c, miR-450b-5p, miR-145b, miR-548w, novel\_4, miR-221-3p, miR-9788-3p, miR-216a-3p, miR-455-3p, miR-2459, miR-1185-3p, miR-142-5p, miR-1298-3p, miR-147a, miR-323b-3p, miR-106b-5p, miR-320b, miR-199a-3p, miR-326, novel\_115, miR-1468, miR-1185-5p, miR-3085-3p, miR-3955-3p, miR-124a, miR-2330-5p, miR-106a-5p, miR-3187-3p, miR-2310, miR-30c-1-3p, miR-378d, miR-378j, miR-381-3p, miR-140-5p, miR-221, miR-493-5p, miR-9-3p, miR-504, miR-499b-5p, miR-3064-5p, miR-1185-2-3p, miR-378e, miR-25, miR-378g, miR-2483-3p, miR-615, miR-4726-5p, miR-628-3p, miR-335, miR-1296-5p, miR-9-5p, miR-181d-5p, miR-2447, novel\_60, miR-32-3p, miR-3059-5p, miR-363-3p, miR-3956-3p, miR-1285-5p, miR-124-3p, miR-5703, miR-1197-5p, miR-378a-3p, miR-1434-5p, miR-378i, novel\_133, miR-133a-3p, let-7a-3p, miR-34a-5p, novel\_73, miR-4429, miR-106a, miR-199a-3p, miR-616-3p, miR-383-5p, miR-95-3p, miR-200b, miR-324-3p, miR-92a-1-5p, miR-125b, miR-422a, miR-618, miR-210-5p, miR-34b-5p, miR-3653-3p, miR-106a, miR-320d, miR-760-3p, miR-20a, miR-2411, miR-664b-3p, miR-27b-5p, miR-433-3p, miR-411, miR-450a-1-3p, let-7f-1-3p, novel\_99, miR-1827, miR-186-5p, let-7g-3p, miR-345-5p, miR-3065-3p, miR-552-3p, miR-296-3p, miR-32-5p, miR-140-5p, miR-30c-1-3p, miR-378a-3p, miR-504-5p, miR-32-3p, novel\_25, miR-204-3p, miR-320e, let-7b-3p, miR-222-3p, miR-1468-5p, miR-450b-3p, miR-6516-3p, miR-17-3p, miR-425-5p, miR-433-5p, miR-539-5p, miR-378c, miR-122-5p, miR-6134, miR-181c-5p, miR-142a-5p, miR-6525, miR-450c-3p, miR-145a-5p, miR-3071-5p, miR-542-3p, miR-1843b-5p, miR-1434-3p, miR-181a-5p, miR-665, miR-31-5p, miR-6238, miR-194-3p, miR-20b, miR-134-3p, miR-185-5p, miR-32, miR-2285v, miR-17-5p, miR-106a-5p, miR-125a-5p, miR-124-5p, miR-378a-5p, let-7f-2-3p, miR-493-5p, miR-345-5p, let-7a-2-3p, miR-132-3p, miR-132-3p, miR-378b, miR-3065-

N4BP2 ENSOARGOC NEDD4 bi:

SLC38A5 ENSOARGOC solute c:

miR-361-3p, miR-3591-3p, miR-3065-5p, miR-2284e, miR-412-3p, miR-9851-3p, miR-9-3p, miR-1983, miR-6516-3p, miR-452-3p, miR-499b-5p, miR-320c, miR-27a-3p, miR-4324, miR-133a-5p, miR-2284o, novel\_1, miR-421-5p, miR-147-5p, miR-181d-5p, miR-2284j, miR-432, miR-181a-5p, miR-7857, novel\_23, miR-30b-3p, miR-30b-3p, miR-2284ab, miR-1388-5p, miR-219a-1-3p, miR-450b-5p, miR-101c, miR-2284aa, miR-27b-3p, miR-2284x, miR-188-5p, miR-27a-3p, miR-432-5p, miR-2284d, miR-9788-3p, miR-216a-3p, miR-320b, novel\_115, miR-2411-3p, miR-1343-5p, miR-452-5p, miR-660, miR-466f-3p, miR-33a-5p, miR-2284l, miR-8485, miR-3187-3p, miR-433-3p, miR-320a, miR-3154, miR-767, miR-7144-5p, miR-3074-1-3p, miR-660-5p, miR-21-3p, miR-3965, novel\_25, miR-154b-5p, miR-2284k, miR-15b-3p, miR-6516-3p, miR-767-5p, miR-708-5p, miR-28-5p, miR-486b-3p, miR-539-5p, miR-1306-5p, miR-129-2-3p, miR-2284v, miR-425-5p, miR-6525, miR-323-3p, miR-145-3p, miR-181c-5p, miR-345-3p, miR-2366, miR-2904, miR-1343-5p, miR-5703, miR-1197-5p, miR-4429, miR-133a-3p, miR-664-5p, miR-1224-5p, miR-2284z, miR-545-5p, miR-129-1-3p, novel\_121, miR-205-5p, miR-345-3p, miR-2284m, miR-450a-2-3p, miR-320d, miR-181b-5p, miR-3653-3p, miR-2484, miR-543-5p, miR-2284f, miR-181a-2-3p, miR-421-5p, miR-486-3p, miR-452-3p, miR-2319b, miR-139-5p, miR-24-1-5p, miR-7977, miR-378e, miR-376d, miR-27a-3p, miR-361-3p, miR-378j, miR-504, miR-376a-3p, miR-541-3p, miR-181d-5p, miR-9-5p, miR-1296-5p, miR-2285f, miR-361-3p, miR-877-3p, miR-1285-5p, miR-4726-5p, miR-199b-3p, miR-27a-3p, miR-376b-3p, miR-147a, miR-2285e, miR-2459, miR-216a-3p, miR-455-3p, miR-143-5p, miR-541, miR-2284r, miR-378b, miR-329-3p, miR-296-5p, miR-484, miR-30b-3p, miR-378c, miR-362-3p, miR-1388-5p, miR-2284aa, miR-494-3p, miR-101b-3p, miR-378d, miR-1b-5p, miR-3187-3p, miR-1306-5p, miR-326, miR-342, miR-505, miR-362-3p, miR-491-5p, miR-548o-3p, miR-378a-3p, miR-504-5p, miR-296-3p, miR-139-5p, miR-193b-3p, miR-6130, miR-377-3p, miR-2285c, miR-2312, miR-186-5p, miR-1827, miR-145a-3p, miR-4510, miR-378c, miR-6525, miR-6134, miR-181c-5p, miR-3604, miR-665, miR-664a, miR-6516-3p, miR-487b-5p, miR-4492, miR-18a-3p, miR-3600, miR-2408, miR-362-3p, miR-378i, miR-1197-5p, miR-140-3p, miR-378a-3p, miR-1193, miR-378d, miR-218-1-3p, miR-2285i, miR-486-3p, miR-2285p, novel\_17, miR-185-3p, miR-422a, miR-219b-5p, miR-324-3p, miR-216a-5p, miR-760-3p, miR-30b-3p, miR-1277-5p, novel\_68, novel\_69, miR-669, miR-2387, miR-2285ab, miR-376b-3p, miR-216a-3p, miR-18a-3p, miR-1306, miR-2285k, miR-450b-3p, miR-378f, miR-135b-5p, miR-2319a, miR-135a-2-3p, miR-342-3p, novel\_101, miR-495-3p, miR-193b-3p, miR-2428, miR-326-3p, novel\_87, miR-6119-3p, miR-199c, miR-147-5p, miR-22-5p, miR-656-5p, miR-185-5p, miR-2285g, miR-432-5p, miR-194-3p, miR-149-5p, miR-181a-5p, miR-432, miR-873a-5p, miR-30b-3p, miR-27b-3p, miR-432-3p, miR-377-3p, miR-193a-3p, miR-1343-5p, miR-874-3p, miR-301, miR-3154, miR-329a, miR-10b-3p, miR-1306-5p, miR-193a-5p, miR-1197-3p, miR-378c, miR-145-3p, novel\_63, miR-135a-5p, miR-486b-3p, miR-6517, miR-378h, miR-24-2-5p, miR-9-5p, miR-214-5p, miR-486-5p, miR-

DROSHA ENSOARGO(drosha,

HYOU1 ENSOARGO(hypoxia

miR-28a-3p, miR-145a-3p, miR-4510, miR-16-5p, miR-3074-2-3p, miR-214, miR-1197-3p, miR-1260b, miR-338-3p, miR-181c-5p, miR-6134, miR-2285j, miR-370-5p, miR-664a-5p, miR-424-5p, miR-454-3p, miR-370-5p, miR-21-3p, miR-301a-3p, miR-34c-5p, miR-6130, miR-199a-5p, miR-15b-5p, miR-21a-3p, miR-3154, miR-23b, miR-339b, miR-23a-5p, miR-485-5p, miR-1827, miR-28b, miR-199a-5p, miR-1260a, miR-6119-5p, miR-2285p, miR-216a-5p, miR-185-3p, miR-339a, miR-28-3p, miR-181b-5p, miR-34b-5p, novel\_127, miR-152-3p, miR-18a-3p, miR-6517, novel\_79, miR-1224-5p, miR-23b-3p, miR-322-5p, miR-148b-3p, miR-15a-5p, miR-23c, miR-532-3p, novel\_121, miR-376a-5p, miR-1246, miR-1197-5p, miR-184-3p, miR-582-3p, miR-142-3p, miR-19b-3p, miR-218-1-3p, miR-34a-5p, miR-2285f, miR-1296-5p, miR-181d-5p, miR-1193, miR-361-3p, miR-24-3p, miR-371b-3p, miR-1307-3p, miR-449a, miR-301b-3p, miR-199b-5p, miR-15a, miR-28c, miR-34c, miR-16a, miR-2284q, miR-2285u, miR-3596, novel\_69, miR-670-3p, miR-34b, miR-203-3p, miR-669, miR-4443, miR-2285ab, miR-140-5p, miR-148a-3p, miR-199b-5p, miR-3591-3p, miR-18a-3p, miR-299b-5p, miR-450b-3p, miR-19a-3p, miR-9851-3p, miR-195a-5p, miR-379-5p, miR-1388-3p, miR-424-5p, miR-23a-3p, miR-582, miR-2285v, miR-16b, miR-130b-3p, miR-199b-5p, miR-214-3p, miR-1343-3p, miR-130a-3p, miR-339-5p, miR-145b, miR-185-5p, miR-411-5p, miR-149-5p, miR-296-5p, miR-708-3p, miR-181a-5p, miR-125b-2-3p, miR-145a-5p, miR-16b, miR-2426, miR-1260b, miR-101c, miR-1839-5p, miR-497-5p, miR-7862  
 miR-10b, miR-219a-1-3p, miR-544a, miR-1388-5p, miR-29b, miR-16b, miR-7862, miR-2284x, miR-497-5p, novel\_4, miR-103a-3p, miR-130a-3p, miR-376b-3p, miR-103, miR-544b, miR-20b, miR-326, miR-320b, miR-17-5p, miR-16b, miR-106b-5p, miR-106a-5p, miR-29b-1-5p, miR-130b-3p, miR-424-5p, miR-106a-5p, miR-2284b, miR-432-3p, miR-432-3p, miR-2387, miR-376b-3p, miR-107, miR-136-5p, miR-3963, miR-195a-5p, miR-376a-3p, miR-2284g, miR-7977, miR-10a-5p, miR-499b-5p, miR-29a-3p, miR-3082-5p, miR-2404, miR-499a-3p, miR-376d, miR-320c, miR-20a-5p, novel\_82, miR-15a, miR-16a, miR-29a, miR-2447, miR-29c-3p, miR-301b-3p, miR-326-3p, miR-134, miR-330-5p, miR-29d-3p, miR-4429, miR-33b-3p, miR-10a-5p, miR-2284u, miR-106a, miR-15a-5p, miR-24-2-5p, miR-322-5p, miR-134-5p, miR-210-5p, miR-376b-3p, miR-3601, miR-106a, miR-320d, miR-221-5p, miR-107, miR-181a-2-3p, miR-20a, miR-29b-1-5p, miR-450b-5p, miR-1271-3p, miR-2284a, miR-3065-3p, miR-2432, miR-2284y, miR-488-3p, miR-433-3p, miR-17-5p, miR-320a, miR-93-5p, miR-20b-5p, miR-221-5p, miR-2355-5p, miR-3065-3p, miR-499b-3p, miR-10a, miR-15b-5p, miR-204-3p, miR-5100, miR-2285j, miR-29b-3p, miR-134-5p, miR-454-3p, miR-424-5p, miR-16-5p, miR-93, miR-10b-5p

miR-541, miR-2284r, novel\_78, miR-1343-3p, miR-1298-3p, miR-376b-3p, miR-2459, miR-431-5p, miR-16b, novel\_19, miR-29b-1-5p, miR-130b-3p, miR-214-3p, miR-1388-3p, miR-23a-3p, miR-2310, miR-1306-3p, miR-504, miR-96-5p, miR-376a-3p, miR-2319b, miR-4792, miR-2285u, miR-3596, miR-378g, miR-2440, miR-628-3p, miR-3968, miR-499a-5p, miR-2447, miR-877-3p, miR-361-3p, miR-423-5p, miR-2366, miR-217-5p, miR-361-5p, miR-34a-5p, miR-218-1-3p, miR-664-5p, miR-133a-3p, miR-18a-3p, miR-30d-3p, miR-212-5p, miR-23b-3p, miR-208b-3p, miR-92a-1-5p, miR-3601, miR-324-3p, miR-142a-3p, miR-143-3p, miR-486-3p, miR-129b-3p, miR-1827, miR-625-5p, miR-1895, miR-504-5p, miR-2331-3p, miR-30c-1-3p, miR-552-3p, miR-296-3p, miR-582-5p, miR-301a-3p, miR-15b-5p, miR-30e-3p, miR-2285j, miR-665, miR-3604, miR-30a-3p, miR-130b-5p, miR-874-5p, miR-1468-5p, miR-4492, miR-454-3p, miR-129-2-3p, miR-214, miR-665-5p, miR-6525, miR-769-5p, miR-181c-5p, miR-3184-5p, miR-7b-5p, miR-542-3p, miR-22-3p, miR-16b, miR-497-5p, miR-103a-3p, miR-31-5p, miR-3955-5p, miR-134-3p, miR-149-5p, novel\_116, miR-7-5p, novel\_51, miR-628-5p, miR-668-3p, miR-432-3p, miR-432-3p, miR-148a-3p, miR-3591-3p, miR-216a-3p, miR-1306, miR-2319a, miR-216b-3p, miR-320c, miR-576-3p, miR-208a-3p, miR-142b, miR-28c, miR-29a, miR-335-5p, miR-29c-3p, miR-1839-3p, miR-301b-3p, miR-3591-5p, miR-330-5p, miR-23b-5p, miR-1343-5p, miR-6517, miR-2285ad, miR-431, miR-1224-5p, miR-758-5p, miR-322-5p, miR-129-1-3p, miR-2284z, miR-8117, miR-125a-3p, miR-205-5p, novel\_127, miR-152-3p, miR-200a-3p, miR-3064-5p, miR-450b-5p, miR-29a-5p, novel\_39, miR-23b, miR-2474, miR-1248, miR-874-3p, miR-3956, miR-2355-5p, miR-542-5p, miR-2284k, novel\_63, miR-2284v, novel\_42, miR-16-5p, miR-296-5p, miR-484, miR-6529a, miR-3120-5p, miR-2284aa, miR-409b, miR-222-5p, miR-142-



miR-88b-3p, miR-30c, miR-200b-3p, miR-34b-3p, miR-134, miR-30a-5p, miR-330-5p, miR-9-5p, miR-322-5p, miR-505-5p, miR-483-3p, miR-134-5p, miR-486-5p, novel\_121, miR-2285ad, miR-429-3p, miR-7641, miR-1224-5p, miR-431, miR-17-3p, miR-200c-3p, miR-127-5p, miR-107, miR-543-5p, novel\_96, miR-200a-3p, novel\_127, miR-1260a, miR-200c, miR-30c-2-3p, miR-28b, novel\_39, miR-3956-5p, miR-29b-2-5p, miR-3064-5p, miR-181a-2-3p, miR-329b, miR-671-5p, miR-485-5p, miR-30e-5p, miR-320a, miR-300-3p, miR-374c-3p, miR-874-3p, miR-542-5p, miR-141-3p, miR-125a, miR-615-5p, miR-3432a, miR-134-5p, miR-486b-3p, miR-28-5p, miR-2433, miR-370-5p, miR-125b-5p, miR-331-3p, miR-1260b, miR-181c-3p, miR-365a-5p, miR-16-5p, miR-103b, miR-30b-3p, miR-16b, miR-1260b, miR-497-5p, miR-744-5p, miR-22-3p, miR-197-3p, miR-3071-5p, miR-145a-5p, miR-6238, novel\_116, miR-149-5p, miR-103, miR-2355-3p, miR-544b, miR-103a-3p, miR-130a-3p, miR-665, miR-483-3p, miR-125a-5p, miR-224-5p, miR-377-3p, miR-365b-5p, novel\_51, miR-2411-3p, miR-668-3p, miR-2483-5p, miR-1291, miR-107, miR-195a-5p, miR-6395, miR-505-3p, miR-18a-3p, miR-670-3p, miR-320c, miR-669, novel\_68, miR-329-5p, miR-320b, miR-655-5p, miR-7-1-3p, miR-128-1-5p, miR-147-5p, miR-199c, miR-15a, miR-28c, miR-16a, miR-24-3p, miR-371b-3p, miR-326-3p, novel\_27, miR-301b-3p, miR-2285m, miR-342-3p, miR-17-3p, miR-542-5p, miR-1193, miR-493-3p, miR-4429, miR-664-5p, miR-378d, novel\_133, miR-30c-5p, miR-2300b-3p, miR-193b-5p, miR-124-3p, miR-15a-5p, miR-200b, novel\_83, miR-199a-3p, miR-532-3p, miR-328-3p, miR-18a-3p, miR-505-3p, miR-212-5p, miR-320d, miR-202-5p, miR-760-3p, miR-466i-5p, miR-30d, miR-221-5p, miR-30b, novel\_17, miR-618, miR-210-5p, miR-542-5p, miR-324-3p, miR-125b, miR-185-3p, miR-92a-1-5p, miR-345-3p, miR-130a-5p, miR-125b-2-3p, miR-486-3p, miR-143-

miR-218-2-3p, miR-29d-3p, miR-30a-5p, miR-128-3p, let-7a-2-3p, miR-10a-5p, miR-222, miR-7641, miR-376a-5p, miR-24-2-5p, miR-1271-5p, miR-483-3p, miR-2411-5p, miR-214-5p, miR-2285af, miR-1260a, miR-339a, miR-450a-2-3p, miR-17-3p, miR-107, miR-29b-2-5p, miR-4286, miR-380-5p, miR-3065-3p, miR-1271-3p, miR-488-3p, miR-2448-3p, miR-362-5p, miR-10b-3p, let-7g-3p, miR-485-5p, miR-370-3p, miR-141-3p, miR-215-5p, miR-615-5p, miR-34c-5p, miR-365a-3p, miR-3965, miR-154b-5p, miR-2284n, miR-551b-3p, miR-29b-3p, miR-1306-3p, miR-2332, miR-138-5p, miR-204-5p, miR-6128, miR-103b, miR-500b-5p, miR-365a-5p, miR-873a-5p, miR-1434-3p, miR-138, miR-21-5p, miR-29b, miR-1260b, miR-7862, miR-187-3p, miR-133b-5p, miR-432-5p, miR-185-5p, miR-6238, miR-544b, miR-103, miR-330-3p, miR-2331-5p, miR-125a-5p, miR-130b-5p, miR-2483-5p, miR-296-3p, miR-2387, miR-21c, miR-378b, miR-18a-3p, miR-1291, miR-450b-3p, miR-107, miR-19a-3p, miR-376a-2-5p, miR-195a-5p, miR-10a-5p, miR-2404, miR-323a-5p, miR-29a-3p, miR-34b, miR-502-5p, miR-15a, miR-6529b, miR-34c, miR-16a, miR-342-3p, miR-219b-3p, novel\_101, miR-17-3p, miR-2285x, miR-211, miR-24-3p, miR-371b-3p, miR-326-3p, novel\_27, miR-449a, miR-376a-5p, miR-215-5p, miR-2300b-3p, miR-1246, miR-124-3p, miR-2904, miR-140-3p, miR-188-3p, miR-1193, miR-19b-3p, miR-3600, miR-15a-5p, miR-532-3p, miR-185-3p, miR-125b, miR-2284m, miR-760-3p, miR-466i-5p, miR-30d, miR-34b-5p, miR-2887, miR-29b-1-5p, miR-2432, miR-2411, miR-27b-5p, miR-30f, novel\_99, miR-140-5p, miR-3065-3p, miR-192-5p, miR-544-3p, miR-323-5p, miR-204-3p, novel\_32, miR-877-5p, miR-222-3p, miR-324-3p, miR-29b-2-5p, miR-320e, miR-17-3p, miR-664a, miR-208b-5p, miR-424-5p, miR-539-5p, miR-1271, miR-10b-5p, miR-206-3p, miR-338-3p, miR-484, miR-296-5p, miR-6529a, miR-10b, miR-7857, miR-412-3p, miR-544a, miR-450b-5p, miR-2426, miR-16-2-3p, miR-

miR-382-5p, miR-33a-3p, miR-412-5p, miR-4324, miR-133a-5p, miR-20a-5p, miR-576-3p, miR-6123, novel\_101, miR-1193, miR-342-3p, novel\_120, miR-335-5p, novel\_27, miR-199b-5p, miR-301b-3p, miR-1306, miR-216a-3p, miR-146b-5p, miR-379-5p, miR-450b-3p, miR-107, miR-26b-5p, miR-216b-3p, miR-144-3p, miR-320c, miR-374c-3p, miR-106a-5p, miR-194a, miR-17-5p, miR-2411-3p, miR-146a, miR-125a-5p, miR-452-5p, miR-466f-3p, miR-378a-5p, miR-2285l, miR-382, miR-130b-5p, miR-380-5p, miR-539-3p, let-7a-2-3p, miR-197-3p, novel\_23, miR-194-5p, miR-3071-5p, miR-708-3p, miR-1434-3p, miR-27b-3p, miR-7862, miR-2284ab, miR-138, miR-130a-3p, miR-339-5p, miR-377-5p, miR-31-5p, miR-103a-3p, miR-20b, miR-103, miR-2355-3p, miR-3431, miR-144, miR-100-3p, miR-125b-5p, miR-3969, miR-5100, miR-370-5p, miR-138-5p, miR-6128, miR-3607-3p, miR-93, miR-93-5p, miR-137-3p, miR-3154, miR-17-5p, miR-320a, miR-30e-5p, miR-2448-3p, miR-301, miR-503-3p, miR-20b-5p, novel\_48, miR-10b-3p, miR-329b, let-7g-3p, miR-141-3p, miR-125a, miR-223-5p, miR-199a-5p, miR-133c, miR-374c-3p, miR-3071-3p, miR-339a, miR-2285af, miR-200c, miR-107, miR-200a-3p, miR-200c-3p, miR-127-5p, miR-199a-5p, miR-1271-3p, miR-192-3p, miR-380-5p, miR-2478, miR-30a-5p, miR-345-3p, miR-3591-5p, miR-128-3p, miR-30c, miR-200b-3p, let-7a-2-3p, novel\_79, miR-412, miR-431, miR-222, miR-429-3p, miR-2284z, miR-24-2-5p, miR-302a-5p, miR-371a-5p, miR-30b-5p, miR-2284q, miR-3958-3p, miR-335, miR-194b-5p, novel\_60, miR-2447, miR-3956-3p, miR-541-3p, miR-8095, miR-361-3p, miR-129b-5p, miR-361-3p, miR-199b-5p, miR-221, novel\_94, miR-299b-5p, miR-668-5p, miR-541-5p, miR-27a-3p, miR-2483-3p, miR-3082-5p, miR-29b-1-5p, miR-182-5p, miR-106b-5p, miR-342, miR-320b, miR-431-5p, miR-1306-5p, miR-146b, miR-199b-5p, miR-130b-3p, miR-376b, miR-106a-5p, miR-412-3p, miR-2284r, miR-484, miR-541, miR-16-2-3p, miR-21b, miR-21-3p, miR-454-5p, miR-216b-5p, miR-670-3p, miR-30d-5p, miR-30e-5p, miR-146b-5p, miR-485-5p, miR-767, miR-30f, miR-3607-3p, miR-181d-5p, miR-145a-3p, miR-326-3p, novel\_87, miR-30b-5p, miR-576-3p, miR-130b-5p, novel\_1, miR-767-5p, novel\_116, miR-2411-5p, miR-185-5p, miR-3962, miR-330-5p, miR-30a-5p, miR-3071-5p, miR-30c-5p, miR-181a-5p, miR-30c, miR-130b-5p, miR-146a-5p, miR-2411, miR-2285r, miR-30b, miR-196a-3p, miR-326, miR-146a, miR-146b, miR-30d, miR-181b-5p

LHX8

ENSOARGO(LIM home

PDILT

ENSOARGO( protein

miR-320d, miR-202-5p, miR-30b-3p, miR-299-3p, miR-26a-5p, miR-324-3p, miR-345-3p, miR-125b, miR-664b-3p, miR-376a-5p, miR-181b-1-3p, miR-125b-2-3p, miR-486-3p, miR-2411, miR-143-3p, miR-329a-5p, miR-183-5p, miR-142-3p, miR-4429, miR-133a-3p, miR-148a-5p, novel\_133, miR-362-3p, miR-2366, miR-98-3p, miR-5703, miR-217-5p, miR-188-3p, miR-23b-3p, miR-7859, miR-23c, miR-199a-3p, novel\_74, miR-487b-5p, miR-6516-3p, miR-708-5p, miR-130b-5p, miR-222-3p, miR-2285j, miR-324-3p, miR-338-5p, miR-665, miR-6525, miR-98-3p, miR-206-3p, miR-346, miR-181c-5p, miR-3074-5p, miR-214, miR-2312, miR-133b-3p, miR-345-5p, miR-885-3p, miR-299, miR-129b-3p, miR-377-3p, miR-499b-3p, miR-139-5p, miR-204-3p, miR-30c-1-3p, miR-548o-3p, miR-370-5p, miR-3085-3p, miR-487b-5p, miR-214-3p, miR-320b, miR-199a-3p, miR-326, miR-505, miR-362-3p, miR-30c-1-3p, miR-8485, miR-2310, miR-23a-3p, let-7c-3p, miR-33a-5p, miR-1388-5p, miR-362-3p, miR-2426, miR-101c, miR-1839-5p, miR-2284aa, miR-3120-5p, miR-329-3p, miR-1a-3p, miR-30b-3p, miR-9788-3p, miR-148b-5p, miR-221-3p, miR-455-3p, miR-421, miR-1185-3p, miR-1343-3p, novel\_4, miR-330-3p, miR-181b-2-3p, miR-3968, miR-335, miR-450a-5p, miR-374a-3p, miR-218-5p, novel\_82, miR-101-3p, miR-2285y, miR-1285-5p, miR-9-3p, miR-2447, miR-1296-5p, miR-2285f, miR-2284j, miR-452-5p, miR-181d-5p, miR-299b-5p, miR-147-3p, miR-9-3p, miR-361-3p, miR-409-5p, miR-221, miR-378j, miR-378g, miR-3596, miR-499a-3p, miR-3082-5p, miR-1185-2-3p, miR-3064-5p, miR-139-5p, miR-20a-3p, miR-7689-3p, miR-450a-2-3p, miR-181b-5p, miR-127-5p, miR-191-3p, miR-543-5p, miR-200a-3p, miR-30c-2-3p, miR-217, novel\_39, miR-450c-5p, miR-490-3p, miR-192-3p, miR-3064-5p, miR-1, miR-4286, miR-411-3p, miR-885-3p, miR-345-3p, miR-134, miR-330-5p, miR-2411-5p, miR-483-3p, miR-134-5p, miR-2284z, miR-545-5p, miR-299a-3p, miR-222, miR-128-1-5p, miR-34c, miR-769-5p, miR-107-5p, novel\_82, miR-326-3p, miR-449a, miR-199b-5p, miR-9851-3p, miR-96-5p, miR-199b-5p, miR-378g, miR-34b, miR-655-5p, miR-1343-5p, miR-199b-5p, miR-103a-2-5p, miR-491-5p, miR-199a-3p, miR-326, miR-377-3p, miR-5126, miR-296-3p, miR-4532, miR-8485, miR-296-3p, miR-432-3p, miR-432-3p, miR-2889, miR-744-5p, miR-138, miR-30b-3p, miR-22-3p, miR-30b-3p, miR-296-5p, miR-1285, miR-1843b-5p, miR-148b-5p, miR-134-3p, novel\_4, miR-133b-5p, miR-4492, miR-3432a, miR-138-5p, miR-664a, miR-331-3p, miR-665, miR-2433, miR-410-5p, miR-769-5p, miR-1271, miR-193a-5p, miR-129-2-3p, miR-1827, miR-485-5p, miR-199a-5p, miR-22-3p, miR-324-5p, miR-34c-5p, miR-377-3p, miR-769, miR-365a-3p, miR-542-5p, miR-296-3p, miR-874-3p, miR-34b-5p, novel\_96, miR-466i-5p, miR-196a-3p, miR-199a-5p, miR-143-3p, miR-34a-5p, miR-148a-5p, miR-142-3p, miR-1343-5p, miR-330-5p, miR-199a-3p, miR-1247-5p, miR-129-1-3p, miR-505-5p, miR-222-5p, miR-1271-5p, miR-212-5p, miR-3960, miR-6517

miR-16-5p, miR-1306-5p, miR-424-5p, miR-204-5p, miR-324-3p, novel\_63, miR-204-3p, miR-15b-5p, miR-374c-3p, miR-216b-5p, miR-193b-3p, miR-3065-3p, miR-296-3p, miR-503-3p, miR-496-3p, miR-660-5p, miR-885-3p, miR-2312, miR-329b, miR-21a-3p, miR-2285c, miR-503-3p, miR-3065-3p, miR-2285b, miR-664b-3p, miR-107, miR-21-3p, miR-664-3p, miR-532-3p, miR-322-5p, miR-15a-5p, miR-133a-3p, miR-496, miR-885-3p, novel\_27, miR-211, miR-877-3p, miR-2285f, miR-193b-3p, miR-2447, miR-335-5p, miR-128-1-5p, novel\_1, miR-335, miR-16a, miR-371a-5p, miR-15a, miR-218-5p, miR-374c-3p, miR-211-5p, miR-664b, miR-195a-5p, miR-107, miR-1306, miR-2285ab, miR-4532, miR-296-3p, miR-668-3p, miR-424-5p, miR-660, miR-193a-3p, miR-16b, miR-2331-5p, miR-296-3p, miR-1306-5p, miR-2285e, miR-103, miR-2285g, miR-103a-3p, novel\_78, miR-2300a-5p, miR-497-5p, miR-188-5p, miR-16b, miR-3071-5p, miR-125b-2-3p, miR-34c, miR-382-5p, let-7i, miR-133a-5p, miR-147-5p, novel\_1, miR-495-3p, miR-135a-2-3p, miR-326-3p, novel\_27, miR-449a, miR-2428, miR-24-3p, miR-371b-3p, miR-9851-3p, miR-505-3p, miR-6516-3p, miR-450b-3p, miR-320b, miR-7-1-3p, miR-378b, miR-34b, miR-224-5p, miR-660, miR-452-5p, miR-466f-3p, miR-124-5p, miR-539-3p, miR-145a-5p, miR-3071-5p, miR-374b-3p, miR-873a-5p, miR-21-5p, miR-130a-3p, miR-26b-3p, miR-185-5p, let-7g-5p, miR-3969, miR-1-5p, miR-2332, miR-410-3p, miR-486b-3p, miR-145-3p, miR-323-3p, miR-320a, miR-2448-3p, miR-503-3p, miR-1814c, miR-10b-3p, let-7g-3p, miR-598-3p, miR-141-3p, miR-154b-5p, miR-34c-5p, miR-365a-3p, miR-30c-2-3p, let-7c-5p, miR-217, miR-543-5p, miR-450a-2-3p, miR-1, miR-376c-5p, miR-376b-5p, miR-2284a, miR-380-5p, miR-128-3p, let-7a-2-3p, miR-411-3p, miR-582-3p, let-7d, miR-222, miR-545-5p, miR-214-5p, miR-24-2-5p, miR-2285t, miR-335, miR-452-5p, miR-3059-5p, miR-32-3p, miR-361-3p, miR-499b-5p, miR-7977, let-7d-5p, miR-3082-5p, miR-320b, miR-326, novel\_103, let-7e, miR-3955-3p, miR-652-5p, let-7a-5p, miR-494-3p, miR-30c-1-3p, miR-412-3p, miR-125b-2-3p, miR-3120-5p, miR-2426, miR-5010-3p, novel\_4, miR-151a-3p, miR-9788-3p, miR-221-3p, miR-216a-3p, miR-655-3p, miR-222-3p, miR-208b-5p, miR-450b-3p, miR-6516-3p, miR-3074-2-3p, miR-539-5p, miR-4510, let-7b-5p, miR-6134, miR-338-3p, miR-206-3p, miR-27b-5p, miR-21a-3p, novel\_99, miR-182-5p, miR-545-3p, miR-221-5p, miR-32-3p, miR-660-5p, miR-204-3p, miR-6130, miR-139-5p, miR-185-3p, miR-34b-5p, miR-30d, miR-221-5p, miR-299-3p, miR-320d, miR-466i-5p, miR-183-5p, miR-146a-5p, miR-125b-2-3p, miR-124-3p, miR-140-3p, miR-188-3p, miR-1193, novel\_133, miR-1246, miR-376a-5p, miR-4429, miR-3600, miR-1b-3p, miR-505-3p, miR-616-3p, miR-487a-3p, miR-222-5p, miR-148b-3p, miR-206, miR-370-3p, miR-325-5p, miR-1a-1-

MRPS18B ENSOARGO(mitochon

RAB3GAP2 ENSOARGO(RAB3 GTP

miR-93-5p, miR-137-3p, miR-30e-5p, miR-20b-5p, miR-1248, miR-329b, miR-345-5p, miR-2285aa, miR-2355-5p, miR-1271, miR-574-5p, miR-874-3p, miR-503-3p, miR-300-3p, miR-3959-5p, novel\_63, miR-2284k, miR-592, novel\_9, miR-16-5p, miR-2284v, miR-1197-3p, miR-330-5p, miR-196a-5p, miR-1224-5p, miR-2285ad, miR-429-3p, miR-2284z, miR-129-1-3p, miR-322-5p, novel\_127, miR-6536, let-7f-5p, miR-127-5p, let-7g, miR-29a-5p, miR-2285b, miR-1306, miR-216a-3p, miR-146b-5p, miR-378f, let-7e-5p, miR-412-3p, miR-3074-5p, miR-329-5p, miR-320c, miR-677, miR-181b-3p, miR-374c-3p, miR-28c, miR-1839-3p, novel\_23, miR-19b-2-5p, miR-7b-5p, miR-497-5p, miR-2284x, miR-27b-3p, miR-16b, miR-16-1-3p, miR-149-5p, miR-412-5p, miR-3535, miR-365b-5p, novel\_51, miR-2411-3p, miR-7-5p, miR-377-3p, miR-146a, miR-196b-5p, let-7f-2-3p, let-7f-2-3p, let-7j, let-7a-2-3p, miR-2284l, miR-30d-5p, miR-655, miR-543-3p, miR-345-5p, miR-216b-3p, miR-2331-3p, let-7i-5p, miR-15b-5p, miR-10a, miR-377-3p, miR-2284s, let-7f, let-7b-3p, miR-129-5p, miR-214, let-7b, miR-129-2-3p, miR-3074-5p, miR-181c-5p, miR-6525, miR-769-5p, novel\_44, miR-224-5p, miR-378a-3p, miR-378i, miR-2366, miR-1961, miR-16-1-3p, miR-361-5p, miR-148a-5p, miR-142-3p, miR-33b-3p, miR-212-5p, miR-18a-3p, miR-106a, miR-328-3p, miR-422a, miR-345-3p, let-7k, miR-98-5p, miR-329a-5p, miR-181b-1-3p, miR-378j, miR-376a-3p, miR-335-3p, miR-1983, miR-136-5p, miR-7689-3p, miR-1185-2-3p, miR-301a-5p, novel\_82, miR-101-3p, miR-490-5p, miR-3968, miR-2284j, miR-2447, miR-1285-5p, miR-361-3p, novel\_111, miR-2284r, miR-301b-5p, miR-541, miR-101c, miR-1388-5p, miR-181b-2-3p, miR-145b, miR-1343-3p, miR-148b-5p, miR-1185-3p, miR-539-5p, miR-376b-3p, miR-147a, miR-505, miR-29b-1-5p, miR-106b-5p, miR-16b, miR-182-5p, miR-146b, miR-214-3p, miR-1388-3p, miR-101b-3p, miR-8485, miR-378d, miR-17-5p, miR-320a, miR-3071-3p, miR-2284aa, miR-2284z

PBX3 ENSOARGO(pre-B-ce

ANXA1 ENSOARGO(annexin

miR-29b-1-5p, miR-20a, miR-10b-3p, miR-21-3p, miR-30b-3p, miR-1277-5p, miR-106a, miR-185-3p, miR-542-5p, novel\_83, miR-532-3p, miR-15a-5p, miR-200b, miR-505-3p, miR-1b-3p, miR-3960, miR-548e-3p, miR-378d, miR-19b-3p, miR-140-3p, miR-188-3p, miR-124-3p, miR-2904, miR-362-3p, miR-2408, miR-6134, let-7b-5p, miR-206-3p, miR-10b-5p, miR-145a-3p, miR-424-5p, miR-17-3p, miR-320e, miR-877-5p, miR-22-3p, miR-204-3p, miR-193b-3p, miR-27a-5p, miR-140-5p, miR-30f, miR-21a-3p, miR-4532, miR-30c-1-3p, miR-2330-5p, miR-424-5p, miR-106a-5p, let-7a-5p, miR-542-5p, let-7e, miR-25-5p, miR-3085-3p, miR-362-3p, miR-1306-5p, miR-5126, miR-342, miR-9788-3p, novel\_4, miR-2300a-5p, miR-3120-5p, miR-2284aa, miR-299a-5p, miR-30b-3p, miR-125b-2-3p, miR-10b, miR-296-5p, miR-484, miR-154a, miR-1296-5p, miR-212-3p, miR-7134-3p, miR-335, miR-4726-5p, miR-107-5p, miR-2285y, miR-2285n, miR-454-5p, let-7d-5p, miR-499b-5p, miR-20a-3p, miR-3064-5p, miR-361-3p, miR-1271-3p, miR-28b, miR-4286, miR-181a-2-3p, miR-30a-3p, miR-3529-3p, miR-200c-3p, miR-17-3p, miR-2898, let-7c-5p, miR-339a, miR-30c-2-3p, miR-200c, miR-2285af, miR-214-5p, miR-423-3p, miR-10a-5p, miR-200b-3p, let-7d, miR-30a-5p, miR-29d-3p, miR-345-3p, miR-93, miR-486b-3p, miR-138-5p, miR-99b-3p, miR-29b-3p, miR-324-5p, miR-365a-3p, miR-370-3p, miR-7144-5p, miR-3154, miR-17-5p, miR-2483-5p, miR-1343-5p, miR-124-5p, miR-106a-5p, miR-17-5p, miR-330-3p, miR-197-5p, miR-20b, let-7g-5p, miR-377-5p, miR-7862, miR-744-5p, miR-2889, miR-138, miR-30b-3p, miR-29b, miR-653, miR-1307-3p, miR-371b-3p, miR-24-3p, novel\_101, miR-542-5p, miR-17-3p, miR-495-3p, miR-3957-3p, miR-342-3p, miR-147-5p, miR-203b-5p, miR-128-1-5p, let-7i, miR-33a-3p, miR-16a, miR-20a-5p, miR-15a, miR-29a-3p, miR-10a-5p, miR-655-5p, miR-505-3p, miR-195a-5p, miR-7975, miR-9851-3p, miR-19a-3p, miR-9285b, miR-1991, miR-18a-3p, miR-3059-5p, miR-296-3p, miR-1260b, miR-345-3p, miR-2411-3p, miR-296-3p, miR-1260a, novel\_96, miR-760-3p, miR-487b-5p, miR-491-5p, miR-345-3p, miR-488-3p, miR-885-3p, miR-1260b, miR-2426, miR-885-3p, miR-876-3p, miR-320b, miR-1260a, miR-185-3p, miR-217, miR-422a, miR-32, miR-181b-5p, miR-320d, miR-299-3p, miR-92a-3p, miR-30b-3p, miR-33a-5p, miR-23a-3p, miR-378d, miR-92b-3p, miR-143-3p, miR-181a-5p, miR-2300b-3p, miR-223-3p, miR-378i, miR-378b, miR-378a-3p, miR-217-5p, miR-4429, miR-1260b, miR-378c, miR-299a-3p, miR-378h, miR-23c, miR-23b-3p, novel\_116, miR-532-3p, miR-410-5p, miR-4324, miR-320e, miR-769-5p, miR-92a-3p, miR-204-5p, miR-4492, miR-363-3p, miR-378c, miR-181d-5p, miR-1260b, miR-211, miR-769-5p, miR-181c-5p, miR-378c, miR-361-3p, miR-23b, miR-320a, miR-378f, miR-20a-3p, miR-378a-3p, miR-32-5p, miR-211-5p, miR-769, miR-299b-3p, miR-25-3p, miR-378e, miR-25, miR-320c

ZNF70 ENSOARGO(zinc fin.5p, miR-20a-3p, miR-3064-5p, miR-361-3p, miR-1271-3p, miR-28b, miR-4286, miR-181a-2-3p, miR-30a-3p, miR-3529-3p, miR-200c-3p, miR-17-3p, miR-2898, let-7c-5p, miR-339a, miR-30c-2-3p, miR-200c, miR-2285af, miR-214-5p, miR-423-3p, miR-10a-5p, miR-200b-3p, let-7d, miR-30a-5p, miR-29d-3p, miR-345-3p, miR-93, miR-486b-3p, miR-138-5p, miR-99b-3p, miR-29b-3p, miR-324-5p, miR-365a-3p, miR-370-3p, miR-7144-5p, miR-3154, miR-17-5p, miR-2483-5p, miR-1343-5p, miR-124-5p, miR-106a-5p, miR-17-5p, miR-330-3p, miR-197-5p, miR-20b, let-7g-5p, miR-377-5p, miR-7862, miR-744-5p, miR-2889, miR-138, miR-30b-3p, miR-29b, miR-653, miR-1307-3p, miR-371b-3p, miR-24-3p, novel\_101, miR-542-5p, miR-17-3p, miR-495-3p, miR-3957-3p, miR-342-3p, miR-147-5p, miR-203b-5p, miR-128-1-5p, let-7i, miR-33a-3p, miR-16a, miR-20a-5p, miR-15a, miR-29a-3p, miR-10a-5p, miR-655-5p, miR-505-3p, miR-195a-5p, miR-7975, miR-9851-3p, miR-19a-3p, miR-9285b, miR-1991, miR-18a-3p, miR-3059-5p, miR-296-3p, miR-1260b, miR-345-3p, miR-2411-3p, miR-296-3p, miR-1260a, novel\_96, miR-760-3p, miR-487b-5p, miR-491-5p, miR-345-3p, miR-488-3p, miR-885-3p, miR-1260b, miR-2426, miR-885-3p, miR-876-3p

ACSM5 ENSOARGO(acyl-CoA 5p, miR-491-5p, miR-345-3p, miR-488-3p, miR-885-3p, miR-1260b, miR-2426, miR-885-3p, miR-876-3p, miR-320b, miR-1260a, miR-185-3p, miR-217, miR-422a, miR-32, miR-181b-5p, miR-320d, miR-299-3p, miR-92a-3p, miR-30b-3p, miR-33a-5p, miR-23a-3p, miR-378d, miR-92b-3p, miR-143-3p, miR-181a-5p, miR-2300b-3p, miR-223-3p, miR-378i, miR-378b, miR-378a-3p, miR-217-5p, miR-4429, miR-1260b, miR-378c, miR-299a-3p, miR-378h, miR-23c, miR-23b-3p, novel\_116, miR-532-3p, miR-410-5p, miR-4324, miR-320e, miR-769-5p, miR-92a-3p, miR-204-5p, miR-4492, miR-363-3p, miR-378c, miR-181d-5p, miR-1260b, miR-211, miR-769-5p, miR-181c-5p, miR-378c, miR-361-3p, miR-23b, miR-320a, miR-378f, miR-20a-3p, miR-378a-3p, miR-32-5p, miR-211-5p, miR-769, miR-299b-3p, miR-25-3p, miR-378e, miR-25, miR-320c

MOGS ENSOARGO(mannosyl 3p, novel\_116, miR-532-3p, miR-410-5p, miR-4324, miR-320e, miR-769-5p, miR-92a-3p, miR-204-5p, miR-4492, miR-363-3p, miR-378c, miR-181d-5p, miR-1260b, miR-211, miR-769-5p, miR-181c-5p, miR-378c, miR-361-3p, miR-23b, miR-320a, miR-378f, miR-20a-3p, miR-378a-3p, miR-32-5p, miR-211-5p, miR-769, miR-299b-3p, miR-25-3p, miR-378e, miR-25, miR-320c

GPR153 ENSOARGOCG protei: miR-98-5p, miR-320d, let-7k, novel\_17, miR-412-5p, miR-216a-5p, miR-376c-3p, miR-29b-1-5p, miR-183-5p, miR-4429, miR-378d, miR-1961, novel\_133, miR-1197-5p, miR-140-3p, miR-487a-3p, miR-616-3p, miR-151-5p, miR-485-3p, miR-3600, miR-487b-5p, novel\_74, let-7f, miR-224-5p, let-7b-5p, miR-145a-3p, let-7b, miR-665-5p, miR-345-5p, miR-133b-3p, miR-1827, miR-2285c, miR-377-3p, miR-376e-3p, miR-151b, let-7i-5p, novel\_25, novel\_32, miR-660-5p, miR-532-5p, miR-370-5p, miR-491-5p, novel\_124, miR-103a-2-5p, let-7e, miR-320b, miR-342, miR-29b-1-5p, miR-2957, miR-8485, let-7a-5p, miR-3120-5p, miR-21b, miR-101c, miR-301b-5p, miR-296-5p, miR-411b-5p, miR-2285e, miR-2300a-5p, miR-145b, miR-335, miR-101-3p, novel\_82, miR-107-5p, miR-301a-5p, miR-371a-5p, miR-361-3p, miR-3059-5p, miR-9-5p, miR-99b-5p, miR-335-3p, miR-361-3p, miR-378g, let-7d-5p, miR-203-3p, let-7f-5p, miR-543-5p, novel\_96, miR-99a, let-7c-5p, miR-148b-5p, novel\_39, let-7g, let-7d, miR-99a-5p, miR-23b-5p, miR-2427, miR-302a-5p, miR-9-5p, miR-214-5p, miR-370-5p, miR-2433, miR-133a-3p, miR-6128, miR-193a-5p, miR-345-5p, miR-485-5p, miR-23a-5p, miR-100-5p, miR-320a, miR-154b-5p, miR-376c-3p, miR-2355-5p, miR-660, miR-377-3p, miR-7-5p, miR-224-5p, miR-99a-5p, novel\_51, miR-190a, miR-654-3p, miR-345-5p, miR-503-3p, miR-668-3p, miR-7b-5p, miR-145a-5p, let-7g-5p, miR-134-3p, miR-2285g, miR-31-5p, novel\_1, miR-203b-5p, miR-22-5p, miR-412-5p, let-7i, miR-335-5p, miR-342-3p, miR-1193, let-7e-5p, miR-146b-3p, miR-320c, miR-655-5p, miR-320b



miR-34c, miR-6402, miR-28c, miR-62b-3p, miR-199c, miR-502b, miR-17-3p, miR-342-3p, novel\_27, miR-449a, miR-2428, miR-150-5p, miR-18a-3p, miR-376b-3p, miR-216a-3p, miR-2387, miR-505-3p, miR-450b-3p, miR-1291, miR-2285k, miR-3120-3p, miR-3074-5p, miR-6535, miR-320c, miR-669, miR-2404, miR-34b, miR-374c-3p, miR-194a, miR-582, miR-1343-5p, miR-125a-5p, miR-466f-3p, miR-378a-5p, miR-2483-5p, miR-363-5p, miR-130b-5p, miR-493-5p, miR-2284l, miR-22-3p, miR-3071-5p, miR-194-5p, miR-145a-5p, miR-19b-2-5p, miR-432, miR-2113, miR-27b-3p, miR-2284x, miR-7862, miR-138, miR-665, miR-133b-5p, miR-194-3p, novel\_116, miR-432-5p, miR-2285g, miR-2284d, miR-125b-5p, miR-331-3p, miR-6740-5p, miR-3969, miR-2284k, miR-2433, miR-2332, miR-486b-3p, miR-28-5p, miR-138-5p, miR-331-5p, miR-193a-5p, miR-320a, miR-362-5p, miR-3154, miR-331-5p, miR-7144-5p, miR-671-5p, miR-876-3p, miR-141-3p, miR-1271, miR-125a, miR-487a-3p, miR-874-3p, miR-374c-3p, miR-34c-5p, miR-217, miR-376b-3p, miR-200c, miR-6119-5p, miR-125a-3p, miR-200a-3p, novel\_96, novel\_127, miR-2898, miR-17-3p, miR-127-5p, miR-200c-3p, miR-29b-2-5p, miR-30a-3p, miR-3064-5p, miR-4286, novel\_39, miR-29a-5p, miR-1957a, miR-3065-3p, miR-1271-3p, miR-28b, miR-450b-5p, miR-148b-5p, miR-1343-5p, miR-128-3p, miR-200b-3p, miR-431, miR-429-3p, miR-214-5p, miR-486-5p, miR-505-5p, miR-9-5p, miR-6516-5p, novel\_82, miR-2440, miR-499a-5p, miR-194b-5p, miR-9-5p, miR-452-5p, miR-3059-5p, novel\_60, miR-2447, miR-3956-3p, miR-154a, miR-7705, miR-362-5p, miR-361-3p, miR-140-5p, miR-409-5p, miR-493-5p, miR-376a-3p, miR-877-3p, miR-504, miR-136-5p, miR-7977, miR-126b-5p, miR-3064-5p, miR-452-3p, miR-10b, miR-27a-3p, miR-376d, miR-4443, miR-489, miR-29b-1-5p, miR-2957, miR-342, miR-320b, miR-431-5p, miR-491-5p, miR-3085-3p, miR-2330-5p, miR-125b-2-3p, miR-3062, miR-484, miR-

miR-106a, miR-450a-2-3p, miR-181b-5p, miR-2484, miR-125a-3p, miR-30f, miR-345-3p, miR-422a, miR-92a-1-5p, miR-376a-5p, miR-130a-5p, miR-486-3p, miR-487a, miR-20a, miR-181a-2-3p, miR-345-3p, miR-378i, miR-376a-5p, miR-215-5p, miR-2300b-3p, miR-124-3p, miR-378a-3p, miR-140-3p, miR-7859, miR-487a-3p, miR-322-5p, miR-302a-5p, miR-378h, miR-15a-5p, miR-106a, miR-7641, miR-30d-3p, miR-138-5p, miR-487b-5p, miR-424-5p, miR-4492, miR-130b-5p, miR-374b-3p, miR-486b-3p, miR-331-3p, miR-93, miR-374a-3p, miR-3184-5p, miR-378c, miR-378c, miR-145a-3p, miR-16-5p, miR-154b-3p, miR-3074-1-3p, miR-543-3p, miR-20b-5p, miR-23a-5p, miR-93-5p, miR-17-5p, miR-377-3p, miR-365a-3p, miR-15b-5p, miR-378a-3p, miR-487a-3p, miR-874-3p, miR-154a-3p, miR-215-5p, miR-377-3p, miR-505, miR-330-3p, miR-106b-5p, miR-16b, miR-106a-5p, miR-17-5p, miR-2411-3p, miR-378d, miR-539-3p, miR-193a, miR-130b-5p, miR-124a, miR-1839-3p, miR-424-5p, miR-6240, miR-106a-5p, miR-378c, miR-138, miR-16b, miR-450b-5p, miR-21b, miR-497-5p, miR-378b, miR-873a-5p, miR-143-5p, miR-145a-5p, miR-9788-3p, miR-20b, miR-2355-3p, miR-3955-5p, miR-330-3p, miR-199b-3p, miR-409b, miR-145b, miR-1843a-3p, miR-154-3p, miR-199c, miR-15a, miR-576-3p, miR-20a-5p, miR-16a, miR-323c, miR-423-5p, miR-2284w, novel\_120, novel\_60, miR-3059-5p, miR-3956-3p, miR-1839-3p, miR-181d-5p, miR-335-3p, miR-378f, miR-195a-5p, miR-378e, miR-3082-5p, miR-329-5p, miR-378b

miR-27b-3p, miR-188-5p, miR-223-3p, novel\_23, miR-3431, miR-194-3p, miR-31-5p, miR-378a-5p, miR-146a, let-7a-2-3p, miR-668-3p, let-7f-2-3p, let-7f-2-3p, miR-2319a, miR-378f, miR-148a-3p, miR-411b-3p, miR-299b-3p, miR-677, miR-320c, miR-181b-3p, miR-216b-3p, miR-199b-5p, miR-301b-3p, miR-1a-1-5p, miR-335-5p, miR-1839-3p, miR-23b-5p, novel\_121, miR-299a-3p, miR-2285ad, miR-429-3p, miR-18b-5p, miR-6536, miR-1a-2-5p, miR-127-5p, miR-152-3p, miR-125a-3p, miR-219-3p, miR-30f, miR-148b-5p, miR-2285b, miR-3064-5p, miR-1248, miR-301, miR-137-3p, miR-331-5p, miR-300-3p, miR-3068-3p, novel\_9, miR-6740-5p, miR-193a-5p, miR-144-5p, miR-1388-5p, miR-21b, miR-758-3p, miR-147a, miR-2459, miR-1185-3p, miR-421, miR-181b-2-3p, miR-145b, miR-1185-5p, miR-130b-3p, miR-199b-5p, miR-214-3p, miR-199a-3p, miR-182-5p, miR-378d, miR-8485, miR-124a, miR-744-3p, miR-96-5p, miR-335-3p, miR-544-5p, miR-203-3p, miR-144-5p, miR-1185-2-3p, miR-139-5p, miR-628-3p, miR-490-5p, novel\_82, miR-361-3p, miR-877-3p, miR-3956-3p, miR-885-5p, miR-33b-3p, miR-664-5p, miR-218-1-3p, miR-34a-5p, miR-361-5p, miR-378i, miR-2366, miR-98-3p, miR-217-5p, miR-378a-3p, miR-7859, miR-30d-3p, miR-202-5p, miR-3653-3p, miR-210-5p, miR-345-3p, miR-422a, miR-664b-3p, miR-376a-5p, miR-181b-1-3p, miR-486-3p, miR-2424, miR-143-3p, miR-195a-3p, miR-625-5p, miR-301a-3p, miR-548o-3p, novel\_74, miR-4492, miR-454-3p, miR-874-5p, miR-130b-5p, let-7b-3p, miR-30e-3p, miR-30a-3p, miR-219b-3p, miR-98-3p, miR-122-5p, miR-214, miR-2284ab, miR-219a-1-3p, miR-653, miR-1434-3p, miR-145a-5p, miR-2285g, miR-187-3p, miR-665, miR-130a-3p, miR-654-3p, miR-130b-5p, miR-382, miR-9851-3p, miR-18b, miR-378b, miR-323a-5p, miR-670-3p, miR-34b, miR-320b, novel\_1, miR-34c, miR-382-5p, miR-449a, miR-2428, miR-17-3p, miR-1193, miR-2285v, miR-300, miR-200b-3p, let-7a-2-3p, miR-345-3p, miR-2355-3p, miR-155-5p, miR-877-3p, miR-376b, miR-2330-5p, miR-216c-5p, miR-877-3p, miR-487a-5p, miR-155-5p, miR-155-5p, miR-382-5p, miR-210-5p

novel\_83, miR-2355-3p, miR-2411-5p, miR-2285ad, miR-3960, let-7a-3p, miR-380-3p, miR-98-3p, miR-124-3p, novel\_23, miR-542-3p, miR-199a-5p, miR-2411, miR-1b-5p, miR-491-3p, miR-380-3p, miR-92b-3p, miR-2483-5p, miR-195a-3p, miR-652-5p, miR-124a, miR-199b-5p, miR-92a-3p, miR-2484, miR-214-3p, miR-466i-5p, miR-32, miR-181c-3p, miR-205-5p, miR-125a-3p, miR-199a-5p, miR-25, novel\_69, miR-216b-5p, miR-25-3p, miR-2285u, miR-532-5p, miR-32-5p, miR-2319a, miR-543-3p, novel\_94, miR-329b, miR-2318, miR-378b, let-7f-1-3p, miR-199b-5p, miR-199b-5p, miR-7705, miR-6525, miR-98-3p, miR-214, miR-452-5p, miR-363-3p, miR-212-3p, miR-31-3p, miR-92a-3p, miR-2285y, let-7b-3p, miR-2285n, miR-218-5p

ZNF791 ENSOARGO(zinc fin.5p, miR-203-3p, miR-144-5p, miR-1185-2-3p, miR-139-5p, miR-628-3p, miR-490-5p, novel\_82, miR-361-3p, miR-877-3p, miR-3956-3p, miR-885-5p, miR-33b-3p, miR-664-5p, miR-218-1-3p, miR-34a-5p, miR-361-5p, miR-378i, miR-2366, miR-98-3p, miR-217-5p, miR-378a-3p, miR-7859, miR-30d-3p, miR-202-5p, miR-3653-3p, miR-210-5p, miR-345-3p, miR-422a, miR-664b-3p, miR-376a-5p, miR-181b-1-3p, miR-486-3p, miR-2424, miR-143-3p, miR-195a-3p, miR-625-5p, miR-301a-3p, miR-548o-3p, novel\_74, miR-4492, miR-454-3p, miR-874-5p, miR-130b-5p, let-7b-3p, miR-30e-3p, miR-30a-3p, miR-219b-3p, miR-98-3p, miR-122-5p, miR-214, miR-2284ab, miR-219a-1-3p, miR-653, miR-1434-3p, miR-145a-5p, miR-2285g, miR-187-3p, miR-665, miR-130a-3p, miR-654-3p, miR-130b-5p, miR-382, miR-9851-3p, miR-18b, miR-378b, miR-323a-5p, miR-670-3p, miR-34b, miR-320b, novel\_1, miR-34c, miR-382-5p, miR-449a, miR-2428, miR-17-3p, miR-1193, miR-2285v, miR-300, miR-200b-3p, let-7a-2-3p, miR-345-3p, miR-2355-3p, miR-155-5p, miR-877-3p, miR-376b, miR-2330-5p, miR-216c-5p, miR-877-3p, miR-487a-5p, miR-155-5p, miR-155-5p, miR-382-5p, miR-210-5p

ALDH1A1 ENSOARGO(aldehyde 5p, miR-216c-5p, miR-877-3p, miR-487a-5p, miR-155-5p, miR-155-5p, miR-382-5p, miR-210-5p

novel\_83, miR-2355-3p, miR-2411-5p, miR-2285ad, miR-3960, let-7a-3p, miR-380-3p, miR-98-3p, miR-124-3p, novel\_23, miR-542-3p, miR-199a-5p, miR-2411, miR-1b-5p, miR-491-3p, miR-380-3p, miR-92b-3p, miR-2483-5p, miR-195a-3p, miR-652-5p, miR-124a, miR-199b-5p, miR-92a-3p, miR-2484, miR-214-3p, miR-466i-5p, miR-32, miR-181c-3p, miR-205-5p, miR-125a-3p, miR-199a-5p, miR-25, novel\_69, miR-216b-5p, miR-25-3p, miR-2285u, miR-532-5p, miR-32-5p, miR-2319a, miR-543-3p, novel\_94, miR-329b, miR-2318, miR-378b, let-7f-1-3p, miR-199b-5p, miR-199b-5p, miR-7705, miR-6525, miR-98-3p, miR-214, miR-452-5p, miR-363-3p, miR-212-3p, miR-31-3p, miR-92a-3p, miR-2285y, let-7b-3p, miR-2285n, miR-218-5p

RBM47 ENSOARGO(RNA bind 5p, miR-25, novel\_69, miR-216b-5p, miR-25-3p, miR-2285u, miR-532-5p, miR-32-5p, miR-2319a, miR-543-3p, novel\_94, miR-329b, miR-2318, miR-378b, let-7f-1-3p, miR-199b-5p, miR-199b-5p, miR-7705, miR-6525, miR-98-3p, miR-214, miR-452-5p, miR-363-3p, miR-212-3p, miR-31-3p, miR-92a-3p, miR-2285y, let-7b-3p, miR-2285n, miR-218-5p

miR-103a-2-5p, miR-136-3p, miR-210-5p, miR-205-5p, miR-2285af, miR-345-5p, miR-29a-5p, miR-30a-3p, miR-133a-3p, miR-544a, miR-411-3p, miR-2355-3p, miR-544b, miR-500-5p, miR-30d-3p, miR-3600, miR-2300a-5p, miR-204-5p, miR-147-5p, miR-22-5p, miR-129-5p, miR-379-3p, miR-107-5p, miR-30a-3p, miR-30e-3p, miR-218-5p, miR-338-3p, novel\_111, miR-211, miR-362-5p, miR-877-3p, miR-3059-5p, miR-877-3p, miR-345-5p, miR-345-5p, miR-411, miR-3591-3p, miR-362-5p, miR-378j, miR-677, miR-670-3p, miR-544-3p, miR-211-5p, miR-21-3p, miR-223-5p, miR-15b-5p, miR-34c-5p, miR-323-5p, miR-125a, miR-140-5p, novel\_99, miR-671-5p, miR-10b-3p, miR-488-3p, miR-450a-1-3p, miR-365a-5p, miR-145-3p, miR-6134, miR-6525, miR-224-5p, miR-16-5p, miR-425-5p, miR-214, miR-590-3p, miR-487a-5p, miR-424-5p, miR-129-5p, miR-4492, miR-486b-3p, miR-450b-3p, miR-664a, miR-125b-5p, miR-29b-2-5p, miR-409-3p, miR-2285j, miR-494-5p, miR-2332, miR-450a-1-3p, miR-302a-5p, miR-322-5p, miR-15a-5p, miR-361-5p, miR-34a-5p, miR-1197-5p, miR-486-3p, miR-1271-3p, miR-2285b, miR-181b-1-3p, miR-29b-2-5p, miR-345-3p, miR-3529-3p, miR-105-3p, miR-107, miR-34b-5p, miR-466i-5p, miR-122-3p, miR-125b, miR-185-3p, miR-677, miR-181b-3p, miR-323a-5p, miR-34b, miR-499b-5p, miR-2285u, miR-7-1-3p, miR-195a-5p, miR-877-3p, miR-450b-3p, miR-107, miR-21c, miR-378j, miR-140-5p, miR-449a, miR-154a, miR-2428, miR-877-3p, miR-1296-5p, novel\_101, miR-3059-5p, miR-335-5p, miR-147-5p, miR-335, miR-34c, miR-16a, miR-301a-5p, miR-4324, miR-15a, miR-218-5p, miR-6402, miR-103, miR-432-5p, miR-1298-3p, miR-181b-2-3p, miR-222-5p, miR-3955-5p, novel\_4, miR-103a-3p, miR-497-5p, miR-21-5p, miR-16b, miR-101a-5p, miR-450b-5p, miR-197-3p, miR-450c-3p, miR-758-3p, miR-296-5p, miR-432, miR-2284r, miR-1285, miR-301b-5p, miR-758-3p, miR-376b, miR-494-3p, miR-424-5p, miR-125a-5p, miR-214-3p, miR-124-5p, miR-365b-5p, miR-16b, miR-224-5p

DDX10 ENSOARGOC DEAD (As:

TMC1 ENSOARGOC transmem

miR-224-5p, miR-652b, miR-10b-5p, miR-338-3p, miR-6134, miR-122-5p, miR-3184-5p, miR-4510, miR-214, miR-665-5p, miR-6516-3p, miR-17-3p, miR-130b-5p, miR-708-5p, miR-874-5p, miR-222-3p, miR-320e, miR-3604, miR-665, miR-216b-5p, miR-6130, miR-10a, miR-544-3p, miR-548o-3p, miR-504-5p, miR-21-3p, miR-345-5p, miR-543-3p, miR-2285c, miR-21a-3p, miR-299, miR-129b-3p, miR-376a-5p, miR-2285i, miR-664b-3p, miR-486-3p, miR-466i-5p, miR-760-3p, miR-320d, miR-299-3p, miR-2484, miR-21-3p, miR-185-3p, miR-125b, miR-345-3p, miR-95-3p, miR-328-3p, miR-1247-5p, miR-199a-3p, miR-18a-3p, miR-4429, miR-19b-3p, miR-361-5p, miR-378d, miR-2366, novel\_133, miR-191, miR-5703, miR-1197-5p, miR-140-3p, miR-124-3p, miR-423-5p, miR-3059-5p, miR-335, miR-2285t, miR-615, miR-1973, miR-489, miR-2483-3p, miR-3596, miR-2319b, miR-211-5p, miR-7977, miR-504, miR-221, miR-378j, miR-8485, miR-124a, miR-214-3p, miR-1306-

WNT5B ENSOARGO(wingless) 5p, novel\_103, miR-320b, miR-199a-3p, miR-323b-3p, miR-1298-3p, miR-496-5p, miR-2459, miR-2285e, miR-9788-3p, miR-221-3p, miR-548w, novel\_4, miR-1343-3p, miR-544a, miR-101c, miR-10b, miR-484, miR-30b-3p, miR-323b, miR-1260b, miR-1306-5p, miR-331-5p, novel\_9, miR-134-5p, miR-486b-3p, miR-28-5p, miR-204-5p, miR-191-5p, miR-2332, miR-5100, miR-2433, miR-3969, miR-125b-5p, miR-324-5p, miR-874-3p, miR-574-5p, miR-615-5p, miR-125a, miR-542-5p, miR-370-3p, miR-329b, miR-345-5p, miR-2474, miR-485-5p, miR-671-5p, miR-331-5p, miR-3154, miR-320a, miR-2478, novel\_39, miR-3529-3p, miR-495-5p, miR-127-5p, miR-17-3p, miR-543-5p, novel\_127, miR-107, miR-1260a, miR-758-5p, miR-505-5p, miR-134-5p, miR-222, miR-299a-3p, miR-10a-5p, miR-134, miR-615-3p, miR-345-3p, miR-24-3p, miR-211, miR-2428, miR-335-5p, miR-17-3p, miR-656-5p, miR-22-5p, novel\_69, miR-299b-3p, miR-374c-3p, miR-320c, miR-10a-5p, miR-10a-3p, miR-107, miR-2285k, miR-1291, miR-6516-3p, miR-

let-7a-2-3p, miR-10a-5p, miR-218-2-3p, miR-322-5p, miR-302a-5p, miR-1271-5p, miR-2285ad, miR-200a-3p, novel\_96, miR-1a-2-5p, miR-205-5p, miR-8117, miR-200a, miR-2284y, miR-29b-2-5p, miR-20b-5p, novel\_48, miR-1814c, let-7g-3p, miR-93-5p, miR-17-5p, miR-3154, miR-301, miR-223-5p, miR-141-3p, miR-3969, miR-135a-5p, miR-1-5p, miR-181c-3p, miR-323-3p, miR-93, miR-3607-3p, miR-16-5p, miR-497-5p, miR-188-5p, miR-16b, miR-3071-5p, miR-542-3p, miR-181a-5p, miR-411-5p, miR-2355-3p, miR-20b, miR-2285g, miR-378a-5p, miR-17-5p, miR-106a-5p, miR-539-3p, let-7a-2-3p, miR-654-3p, miR-493-5p, miR-9851-3p, miR-7975, miR-505-3p, miR-135b-5p, miR-195a-5p, miR-412-3p, miR-3065-5p, miR-3591-3p, miR-2285ab, miR-7-1-3p, miR-10a-5p, miR-147-5p, novel\_1, miR-16a, miR-33a-3p, miR-4324, miR-15a, miR-20a-5p, miR-374c-5p, miR-495-3p, novel\_101, miR-1a-1-5p, miR-218-1-3p, miR-2284u, miR-33b-3p, novel\_83, miR-487a-3p, miR-7859, miR-340-5p, miR-15a-5p, miR-1b-3p, miR-485-3p, miR-505-3p, miR-548e-3p, miR-106a, miR-3653-3p, miR-106a, miR-216a-5p, miR-29b-1-5p, miR-125b-2-3p, miR-20a, miR-183-5p, miR-543-3p, miR-2312, let-7g-3p, miR-129b-3p, miR-411, miR-2285c, miR-15b-5p, miR-499b-3p, miR-10a, miR-21-3p, miR-216b-3p, miR-552-3p, miR-504-5p, miR-548o-3p, miR-424-5p, miR-487b-5p, miR-151-3p, miR-29b-2-5p, miR-338-5p, miR-2285j, miR-15b-3p, miR-338-3p, miR-181c-5p, miR-10b-5p, miR-1271, miR-539-5p, miR-3184-3p, miR-3120-5p, miR-125b-2-3p, miR-10b, miR-143-5p, miR-2285e, miR-539-5p, miR-151a-3p, miR-491-5p, miR-29b-1-5p, miR-106b-5p, miR-16b, miR-3187-3p, miR-1b-5p, miR-2310, miR-33a-5p, miR-424-5p, miR-494-3p, miR-106a-5p, miR-493-5p, miR-1983, miR-181a-3p, miR-96-5p, miR-504, miR-129b-5p, miR-203-3p, miR-499a-3p, miR-2285u, miR-2284g, miR-452-3p, miR-499a-5p, miR-2285y, miR-2285n, miR-1285-5p, miR-7705, miR-154a, miR-877-3p, miR-199c, miR-379-3p, miR-4324, miR-502-3p, miR-423-5p, miR-199b-5p, miR-24-3p, miR-495-3p, miR-17-3p, miR-135a-2-3p, miR-335-3p, miR-504, miR-216a-3p, miR-199b-5p, miR-454-5p, miR-500-3p, miR-320b, miR-664b, miR-125a-5p, miR-199b-5p, miR-2957, miR-330-3p, miR-323b-3p, novel\_51, miR-654-3p, miR-2285r, miR-1388-3p, miR-6240, miR-30b-3p, miR-450b-5p, miR-544a, miR-501-3p, miR-323b, miR-30b-3p, miR-432, miR-9788-3p, miR-455-3p, miR-148b-5p, miR-432-5p, miR-185-5p, miR-199b-3p, miR-330-3p, miR-1343-3p, miR-129-5p, miR-17-3p, miR-125b-5p, miR-331-3p, miR-3604, miR-2332, miR-3184-5p, miR-6525, miR-590-3p, miR-7144-5p, miR-671-5p, novel\_99, miR-301, miR-199a-5p, novel\_32, miR-154b-5p, miR-6516, miR-544-3p, miR-216b-5p, miR-2285aa, miR-3065-3p, miR-125a, miR-574-5p, miR-504-5p, miR-496-3p, miR-503-3p, miR-17-3p, miR-500a-5p, miR-125b, miR-6119-5p, miR-664-3p, miR-125a-3p, miR-3065-3p, miR-199a-5p, miR-148b-5p, miR-2385-3p, miR-128-3p, miR-148a-5p, miR-496, miR-411-3p, miR-501-3p, miR-2408, miR-545-5p, miR-6516-5p

ZFAND5

ENSOARGO(zinc fin.

IGSF1

ENSOARGO(immunogl.

miR-134-5p, miR-125b-5p, miR-100-3p, miR-193a-5p, miR-20b-5p, miR-93-5p, miR-25-3p, miR-874-3p, miR-125a, miR-2285aa, miR-127-5p, miR-152-3p, novel\_127, novel\_96, miR-8117, miR-148b-5p, miR-2285b, miR-1290, miR-23b-5p, miR-134-5p, miR-450a-1-3p, miR-6517, miR-429-3p, miR-299a-3p, novel\_79, miR-6119-3p, miR-4324, novel\_87, miR-425-5p, miR-148a-3p, miR-374c-3p, miR-299b-3p, miR-320c, novel\_68, novel\_51, miR-2411-3p, miR-32, miR-105-5p, miR-503-3p, miR-6240, miR-16-1-3p, miR-1843b-5p, miR-19b-2-5p, miR-450c-3p, miR-134-3p, miR-194-3p, miR-103a-3p, miR-3955-5p, miR-129-5p, miR-30e-3p, miR-2285j, miR-665, miR-30a-3p, miR-769-5p, miR-181c-5p, miR-186-5p, miR-543-3p, miR-625-5p, miR-2285c, miR-450a-1-3p, miR-129b-3p, miR-548o-3p, miR-30c-1-3p, miR-32-5p, miR-2331-3p, miR-504-5p, miR-296-3p, miR-210-5p, miR-2285p, miR-345-3p, miR-92a-1-5p, miR-377-5p, miR-143-3p, miR-380-3p, miR-486-3p, miR-369-3p, miR-33b-3p, miR-148a-5p, miR-16-1-3p, miR-218-1-3p, miR-2366, miR-217-5p, miR-7859, miR-106a, miR-18a-3p, miR-3968, miR-499a-5p, miR-490-5p, novel\_82, miR-218-5p, novel\_111, miR-885-5p, miR-363-3p, miR-2447, miR-504, miR-96-5p, miR-140-5p, miR-3596, miR-378g, miR-139-5p, miR-2284g, miR-374b-5p, miR-2285u, miR-487b-5p, miR-491-5p, miR-153-3p, miR-106b-5p, miR-29b-1-5p, miR-323b-3p, miR-2310, miR-8485, miR-1388-3p, miR-1388-5p, miR-1298-5p, miR-541, miR-758-3p, miR-323b, miR-1298-3p, miR-153, miR-2459, miR-455-3p, miR-148b-5p, novel\_78, miR-330-3p, miR-1343-3p, miR-486b-3p, miR-370-5p, miR-2332, miR-3969, miR-409-3p, miR-500b-5p, miR-93, miR-10b-3p, miR-145-3p, miR-374b, miR-1814c, miR-485-5p, miR-23a-5p, miR-488-3p, miR-381-3p, miR-17-5p, miR-362-5p, miR-3154, miR-320a, miR-769, miR-200c-3p, miR-181b-5p, miR-450a-2-3p, miR-2898, miR-92a-3p, miR-107, miR-200c, miR-2285af, miR-217, miR-30c-2-

novel\_27, miR-2428, miR-24-3p, miR-1193, miR-17-3p, miR-376a-3p, miR-135a-2-3p, miR-342-3p, novel\_1, miR-16a, miR-33a-3p, miR-15a, miR-20a-5p, miR-28c, miR-576-3p, miR-320c, miR-299b-3p, miR-374c-3p, miR-26b-5p, novel\_68, miR-2319a, miR-7975, miR-146b-5p, miR-6395, miR-195a-5p, miR-505-3p, miR-450b-3p, miR-1306, miR-150-5p, miR-18a-3p, miR-2387, miR-432-3p, miR-654-3p, miR-432-3p, miR-101-5p, miR-380-5p, miR-130b-5p, miR-452-5p, miR-1343-5p, miR-125a-5p, miR-106a-5p, miR-455-5p, miR-17-5p, miR-2411-3p, miR-146a, miR-377-3p, miR-20b, miR-412-5p, miR-31-5p, miR-26a-2-3p, miR-497-5p, miR-455-5p, miR-16b, miR-16-1-3p, miR-219a-1-3p, miR-450c-3p, miR-145a-5p, miR-3071-5p, miR-374b-3p, miR-1285, miR-145-3p, miR-93, miR-1197-3p, miR-374a-3p, miR-16-5p, miR-374b-3p, miR-331-3p, miR-125b-5p, miR-370-5p, miR-376c-3p, miR-374c-3p, miR-769, miR-215-5p, miR-125a, novel\_48, miR-20b-5p, miR-1814c, miR-329b, miR-93-5p, miR-320a, miR-17-5p, miR-3154, miR-488-3p, miR-301, miR-503-3p, miR-2448-3p, novel\_39, miR-2285b, miR-1271-3p, miR-28b, miR-380-5p, miR-2385-3p, miR-30a-3p, miR-29b-2-5p, miR-4286, novel\_127, miR-17-3p, miR-127-5p, miR-30c-2-3p, miR-450a-1-3p, miR-214-5p, miR-322-5p, miR-758-5p, miR-6516-5p, miR-412, miR-299a-3p, miR-218-2-3p, miR-1343-5p, miR-345-3p, miR-3591-5p, miR-219a-5p, novel\_60, miR-3956-3p, miR-541-3p, miR-374a-3p, miR-3968, miR-769-5p, novel\_82, miR-2285n, miR-203-3p, miR-1185-2-3p, miR-499a-3p, miR-3082-5p, miR-126b-5p, miR-139-5p, miR-452-3p, miR-2310, miR-30c-1-3p, miR-744-3p, miR-33a-5p, miR-106a-5p, miR-424-5p, miR-494-3p, miR-146b, miR-29b-1-5p, miR-16b, miR-106b-5p, miR-342, miR-199a-3p, miR-320b, novel\_115, miR-1306-5p, miR-148b-5p, miR-455-3p, miR-1185-3p, miR-539-5p, miR-145b, miR-2300a-5p, miR-409b, miR-548w, miR-151a-3p, miR-101c, miR-101a-5p, miR-412-3p, miR-125b-2-3p, miR-2284r, miR-361-3p, miR-200a-5p, miR-1291, miR-668-5p, miR-504, miR-671-5p, miR-31-5p, miR-504-5p, miR-199b-3p, miR-133b-5p, miR-3596, novel\_69, miR-2440, miR-125b-5p, miR-324-3p, miR-125b, miR-2285l, miR-125a-5p, miR-199c, novel\_42, miR-361-3p

GPNMB

ENSOARGO(glycopro

CELF5

ENSOARGO(CUGBP,

E

1b-3p, miR-320b, miR-370-3p, miR-125a, miR-3120-3p, miR-3596, novel\_69, miR-2440, miR-125b-5p, miR-324-3p, miR-125b, miR-2285l, miR-125a-5p, miR-199c, novel\_42, miR-361-3p



novel\_79, miR-429-3p, miR-2285ad, miR-214-5p, miR-486-5p, miR-30a-5p, miR-2427, miR-1290, miR-345-3p, miR-10a-5p, let-7a-2-3p, miR-30c, miR-105-2, miR-582-3p, miR-181a-2-3p, miR-4286, miR-495-5p, miR-2284a, miR-2285b, novel\_39, miR-29a-5p, miR-199a-5p, miR-376c-5p, miR-376b-5p, miR-2284y, miR-148b-5p, miR-217, miR-339a, miR-3071-3p, miR-200c, miR-125a-3p, miR-1260a, miR-200a-3p, miR-200c-3p, miR-127-5p, miR-125a, miR-141-3p, miR-542-5p, miR-2355-5p, miR-874-3p, miR-574-5p, miR-199a-5p, miR-223-5p, miR-17-5p, miR-376c-5p, miR-3154, miR-93-5p, miR-30e-5p, miR-488-3p, miR-1248, miR-671-5p, miR-7144-5p, novel\_48, miR-376c-5p, miR-20b-5p, let-7g-3p, miR-329b, miR-10b-3p, miR-2284v, miR-1306-5p, let-7e-3p, miR-145-3p, miR-1260b, miR-93, miR-409-3p, miR-135a-5p, miR-125b-5p, miR-6740-5p, miR-5100, miR-2284k, miR-592, miR-31-3p, miR-26b-3p, miR-339-5p, miR-122-3p, miR-31-5p, miR-544b, miR-20b, miR-6238, miR-3431, miR-432-5p, miR-2284d, miR-145a-5p, miR-223-3p, miR-1434-3p, miR-708-3p, miR-432, miR-188-5p, miR-2284x, miR-26a-2-3p, miR-1260b, miR-668-3p, miR-493-5p, miR-130b-5p, let-7a-2-3p, miR-2411-3p, miR-106a-5p, miR-17-5p, miR-197-5p, miR-105-5p, miR-660, miR-125a-5p, miR-7-1-3p, miR-10a-5p, miR-378b, miR-329-5p, miR-670-3p, miR-411b-3p, miR-2404, miR-378b, miR-1306, miR-2387, miR-376b-5p, miR-135b-5p, miR-450b-3p, miR-495-3p, miR-542-5p, miR-2284w, miR-199b-5p, novel\_27, miR-323c, miR-485-3p, miR-6402, miR-20a-5p, miR-142b, miR-502-5p, miR-421-5p, miR-22-5p, miR-6119-3p, miR-3600, miR-106a, miR-548e-3p, miR-199a-3p, miR-532-3p, miR-7859, miR-188-3p, miR-217-5p, miR-140-3p, miR-1193, miR-30c-5p, miR-148a-5p, miR-2284u, miR-361-5p, miR-142-3p, miR-33b-3p, miR-20a, miR-329a-5p, miR-2424, miR-130a-5p, miR-376a-5p, miR-125b, miR-92a-1-5p, miR-345-3p, miR-324-3p, miR-500a-5p, miR-219b-5p, miR-210-

miR-106b-3p, miR-487b-5p, miR-491-5p, miR-194a, novel\_51, miR-106b-5p, miR-182-5p, miR-17-5p, miR-106a-5p, miR-365b-5p, miR-29b-1-5p, miR-431-5p, miR-326, miR-193a, miR-33a-5p, miR-363-5p, miR-106a-5p, miR-382-3p, miR-2284x, miR-30b-3p, novel\_23, miR-194-5p, miR-30b-3p, miR-145a-5p, miR-450c-3p, miR-181a-5p, miR-542-3p, miR-484, miR-296-5p, miR-126a-5p, miR-20b, miR-2459, miR-194-3p, miR-216a-3p, miR-1298-3p, miR-134-3p, miR-185-5p, miR-145b, miR-339-5p, miR-133b-5p, miR-3964, miR-2285t, miR-656-5p, miR-499a-5p, miR-20a-5p, novel\_82, miR-326-3p, miR-361-3p, miR-194b-5p, miR-181d-5p, novel\_101, miR-1296-5p, miR-1983, miR-2319a, miR-412-3p, miR-450b-3p, miR-378j, miR-409-5p, miR-140-5p, miR-669, miR-489, miR-3596, miR-146b-3p, miR-378g, miR-320b, miR-2319b, novel\_96, miR-200a-3p, miR-6536, miR-181b-5p, miR-106a, miR-339a, miR-324-3p, miR-219b-5p, miR-125a-3p, miR-29b-1-5p, miR-4286, miR-20a, miR-29b-2-5p, miR-30a-3p, miR-216c-5p, miR-378d, miR-330-5p, miR-2427, novel\_133, miR-450a-1-3p, miR-616-3p, miR-222-5p, miR-23c, miR-383-5p, miR-30d-3p, miR-431, novel\_79, miR-106a, miR-28-5p, miR-708-5p, miR-331-5p, novel\_9, miR-450b-3p, miR-29b-2-5p, miR-30a-3p, miR-6740-5p, miR-30e-3p, miR-181c-5p, miR-365a-5p, miR-93, miR-186-5p, miR-1827, miR-20b-5p, miR-339b, miR-3154, miR-17-5p, miR-93-5p, miR-331-5p, miR-450a-1-3p, miR-331-5p, miR-182-5p, miR-141-3p, miR-370-3p, miR-548o-3p, miR-221-5p, miR-376e-3p, miR-877-5p, miR-450a-1-3p, miR-145a-3p, miR-142a-5p, miR-181c-5p, miR-338-5p, miR-320e, miR-664a, miR-190a-5p, miR-129-5p, miR-7859, miR-193b-5p, miR-1246, miR-4429, miR-378d, miR-329a-5p, miR-195a-3p, miR-376c-3p, miR-143-3p, miR-374a-5p, miR-618, miR-216a-5p, miR-125b, miR-320d, miR-466i-5p, miR-221-5p, miR-10b, miR-374b-5p, miR-211-5p, miR-378g, miR-25, miR-3082-5p, miR-376d, miR-1185-2-3p, miR-140-5p, miR-376a-3p, miR-9-3p, miR-541-3p, miR-190b-5p, miR-181d-5p, miR-9-3p, novel\_82, miR-628-3p, miR-490-5p, miR-142-5p, miR-376b-3p, miR-2320-3p, miR-216a-3p, miR-1185-3p, miR-541, miR-1839-5p, miR-1388-3p, miR-193a, miR-491-3p, miR-320b, miR-431-5p, miR-487b-5p, miR-125a, miR-141-3p, miR-331-5p, miR-154b-5p, miR-376c-3p, miR-30e-5p, miR-488-3p, miR-381-3p, miR-331-5p, miR-301, miR-200a-5p, miR-320a, miR-3154, miR-329b, miR-2318, miR-1248, miR-485-5p, miR-374b, miR-1306-5p, miR-3607-3p, miR-1197-3p, miR-410-5p, miR-5100, miR-125b-5p, miR-331-5p, miR-204-5p, miR-7641, miR-431, miR-302a-5p, miR-450a-1-3p, miR-1290, miR-30a-5p, miR-300, miR-3529-3p, miR-2385-3p, miR-181a-2-3p, miR-450b-5p, miR-376b-3p, miR-2285af, miR-125a-3p, miR-450a-2-3p, miR-6536, miR-181b-5p, miR-200a-3p, miR-329-5p, miR-7-1-3p, miR-2404, miR-670-3p, miR-320c, miR-376b-3p, miR-1291, miR-2285x, miR-211, miR-371b-3p, miR-24-3p, novel\_27, miR-374c-5p, novel\_87, miR-33a-3p, miR-382-5p, novel\_1, miR-22-5p, miR-134-3p, miR-185-5p, miR-149-5p, miR-194-3p, miR-1285, miR-181a-5p, miR-3071-5p, miR-380-3p, miR-2284x, miR-382, let-7f-2-3p, let-7f-2-3p, miR-2284l, miR-190a, miR-105-5p, miR-125a-5p

POP5 ENSOARGO(POP5 hom

UBE2J1 ENSOARGO(ubiquiti

miR-3064-5p, miR-664b, miR-10b, miR-452-3p, miR-20a-3p, miR-499b-5p, miR-211-5p, miR-499a-3p, miR-203-3p, miR-4443, miR-376d, miR-140-5p, miR-199b-5p, miR-129b-5p, miR-493-5p, miR-376a-3p, novel\_94, miR-544-5p, novel\_60, miR-2447, miR-3956-3p, miR-362-5p, miR-877-3p, novel\_82, miR-2285y, miR-4726-5p, miR-1343-3p, miR-145b, miR-376b-3p, miR-455-3p, miR-500-5p, miR-2459, miR-484, miR-1388-5p, miR-101a-5p, miR-299a-5p, miR-1388-3p, miR-424-5p, miR-193a, miR-2310, miR-320b, miR-1306-5p, miR-29b-1-5p, miR-16b, miR-3085-3p, miR-3955-3p, miR-199b-5p, miR-146b, miR-214-3p, miR-140-5p, miR-21-3p, miR-499b-3p, miR-193b-3p, miR-204-3p, miR-877-5p, miR-15b-5p, miR-299, miR-450a-1-3p, miR-433-3p, miR-133b-3p, miR-345-5p, miR-186-5p, miR-3074-5p, miR-214, miR-665-5p, miR-224-5p, miR-664a-5p, miR-338-5p, miR-665, miR-450b-3p, miR-424-5p, miR-129-5p, miR-485-3p, miR-15a-5p, miR-148b-3p, miR-200b, novel\_133, miR-2904, miR-5703, miR-142-3p, miR-4429, miR-19b-3p, miR-378d, miR-329a-5p, miR-195a-3p, miR-29b-1-5p, miR-377-5p, miR-125b-2-3p, miR-146a-5p, novel\_17, miR-324-3p, miR-500a-5p, miR-125b, miR-320d, miR-299-3p, miR-21-3p, miR-329-5p, miR-3074-5p, miR-299b-3p, miR-670-3p, miR-320c, miR-3141, miR-148a-3p, miR-3970, miR-150-5p, miR-1306, miR-3591-3p, miR-376b-3p, miR-450b-3p, miR-19a-3p, miR-146b-5p, miR-195a-5p, miR-193b-3p, miR-495-3p, miR-211, miR-24-3p, miR-199b-5p, miR-15a, miR-133a-5p, miR-485-3p, miR-16a, novel\_87, miR-656-5p, miR-31-5p, miR-3955-5p, miR-377-5p, miR-432-5p, miR-3431, miR-185-5p, miR-149-5p, miR-432, miR-1285, miR-450c-3p, novel\_23, miR-374b-3p, miR-145a-5p, miR-16b, miR-138, miR-497-5p, miR-188-5p, miR-455-5p, miR-7862, miR-493-5p, miR-101-5p, miR-2285r, miR-539-3p, miR-345-5p, miR-224-5p, miR-146a, miR-365b-5p, miR-3141, miR-455-5p, miR-195a-5p, miR-193a-3p, miR-195a, miR-2050-5p, miR-199a-5p, miR-2285w, miR-382-3p, miR-143-3p, miR-142a-3p, miR-2285i, miR-2331-5p, miR-185-3p, miR-2957, miR-181b-5p, miR-2898, miR-548w, novel\_78, miR-133b-5p, miR-2285ad, miR-9788-3p, miR-582-3p, miR-2284h-5p, miR-142-3p, miR-181a-5p, miR-369-5p, miR-219a-1-3p, miR-2426, miR-181d-5p, novel\_101, miR-3607-3p, miR-181c-5p, miR-2284w, miR-369-5p, miR-2284q, miR-1843a-3p, miR-655-5p, miR-3068-3p, miR-3082-5p, miR-671-5p, miR-9851-3p, miR-2285k, miR-2474, miR-10b-3p, miR-3187-3p, miR-1285-5p, miR-371b-3p, miR-3074-2-3p, miR-22-5p, miR-3071-3p, miR-500a-5p, miR-33a-3p, miR-499a-3p, miR-499b-3p, miR-340-5p, novel\_68, miR-26a-2-3p, novel\_99, miR-219a-1-3p, miR-129b-5p, miR-188-3p

IL15RA ENSOARGO(interleukin 15) 200b, novel\_133, miR-2904, miR-5703, miR-142-3p, miR-4429, miR-19b-3p, miR-378d, miR-329a-5p, miR-195a-3p, miR-29b-1-5p, miR-377-5p, miR-125b-2-3p, miR-146a-5p, novel\_17, miR-324-3p, miR-500a-5p, miR-125b, miR-320d, miR-299-3p, miR-21-3p, miR-329-5p, miR-3074-5p, miR-299b-3p, miR-670-3p, miR-320c, miR-3141, miR-148a-3p, miR-3970, miR-150-5p, miR-1306, miR-3591-3p, miR-376b-3p, miR-450b-3p, miR-19a-3p, miR-146b-5p, miR-195a-5p, miR-193b-3p, miR-495-3p, miR-211, miR-24-3p, miR-199b-5p, miR-15a, miR-133a-5p, miR-485-3p, miR-16a, novel\_87, miR-656-5p, miR-31-5p, miR-3955-5p, miR-377-5p, miR-432-5p, miR-3431, miR-185-5p, miR-149-5p, miR-432, miR-1285, miR-450c-3p, novel\_23, miR-374b-3p, miR-145a-5p, miR-16b, miR-138, miR-497-5p, miR-188-5p, miR-455-5p, miR-7862, miR-493-5p, miR-101-5p, miR-2285r, miR-539-3p, miR-345-5p, miR-224-5p, miR-146a, miR-365b-5p, miR-3141, miR-455-5p, miR-195a-5p, miR-193a-3p, miR-195a, miR-2050-5p, miR-199a-5p, miR-2285w, miR-382-3p, miR-143-3p, miR-142a-3p, miR-2285i, miR-2331-5p, miR-185-3p, miR-2957, miR-181b-5p, miR-2898, miR-548w, novel\_78, miR-133b-5p, miR-2285ad, miR-9788-3p, miR-582-3p, miR-2284h-5p, miR-142-3p, miR-181a-5p, miR-369-5p, miR-219a-1-3p, miR-2426, miR-181d-5p, novel\_101, miR-3607-3p, miR-181c-5p, miR-2284w, miR-369-5p, miR-2284q, miR-1843a-3p, miR-655-5p, miR-3068-3p, miR-3082-5p, miR-671-5p, miR-9851-3p, miR-2285k, miR-2474, miR-10b-3p, miR-3187-3p, miR-1285-5p, miR-371b-3p, miR-3074-2-3p, miR-22-5p, miR-3071-3p, miR-500a-5p, miR-33a-3p, miR-499a-3p, miR-499b-3p, miR-340-5p, novel\_68, miR-26a-2-3p, novel\_99, miR-219a-1-3p, miR-129b-5p, miR-188-3p

SLC37A3 ENSOARGO(solute carrier family 37, member 3) 200b, novel\_133, miR-2904, miR-5703, miR-142-3p, miR-4429, miR-19b-3p, miR-378d, miR-329a-5p, miR-195a-3p, miR-29b-1-5p, miR-377-5p, miR-125b-2-3p, miR-146a-5p, novel\_17, miR-324-3p, miR-500a-5p, miR-125b, miR-320d, miR-299-3p, miR-21-3p, miR-329-5p, miR-3074-5p, miR-299b-3p, miR-670-3p, miR-320c, miR-3141, miR-148a-3p, miR-3970, miR-150-5p, miR-1306, miR-3591-3p, miR-376b-3p, miR-450b-3p, miR-19a-3p, miR-146b-5p, miR-195a-5p, miR-193b-3p, miR-495-3p, miR-211, miR-24-3p, miR-199b-5p, miR-15a, miR-133a-5p, miR-485-3p, miR-16a, novel\_87, miR-656-5p, miR-31-5p, miR-3955-5p, miR-377-5p, miR-432-5p, miR-3431, miR-185-5p, miR-149-5p, miR-432, miR-1285, miR-450c-3p, novel\_23, miR-374b-3p, miR-145a-5p, miR-16b, miR-138, miR-497-5p, miR-188-5p, miR-455-5p, miR-7862, miR-493-5p, miR-101-5p, miR-2285r, miR-539-3p, miR-345-5p, miR-224-5p, miR-146a, miR-365b-5p, miR-3141, miR-455-5p, miR-195a-5p, miR-193a-3p, miR-195a, miR-2050-5p, miR-199a-5p, miR-2285w, miR-382-3p, miR-143-3p, miR-142a-3p, miR-2285i, miR-2331-5p, miR-185-3p, miR-2957, miR-181b-5p, miR-2898, miR-548w, novel\_78, miR-133b-5p, miR-2285ad, miR-9788-3p, miR-582-3p, miR-2284h-5p, miR-142-3p, miR-181a-5p, miR-369-5p, miR-219a-1-3p, miR-2426, miR-181d-5p, novel\_101, miR-3607-3p, miR-181c-5p, miR-2284w, miR-369-5p, miR-2284q, miR-1843a-3p, miR-655-5p, miR-3068-3p, miR-3082-5p, miR-671-5p, miR-9851-3p, miR-2285k, miR-2474, miR-10b-3p, miR-3187-3p, miR-1285-5p, miR-371b-3p, miR-3074-2-3p, miR-22-5p, miR-3071-3p, miR-500a-5p, miR-33a-3p, miR-499a-3p, miR-499b-3p, miR-340-5p, novel\_68, miR-26a-2-3p, novel\_99, miR-219a-1-3p, miR-129b-5p, miR-188-3p

CLINT1 ENSOARGO(clathrin) 200b, novel\_133, miR-2904, miR-5703, miR-142-3p, miR-4429, miR-19b-3p, miR-378d, miR-329a-5p, miR-195a-3p, miR-29b-1-5p, miR-377-5p, miR-125b-2-3p, miR-146a-5p, novel\_17, miR-324-3p, miR-500a-5p, miR-125b, miR-320d, miR-299-3p, miR-21-3p, miR-329-5p, miR-3074-5p, miR-299b-3p, miR-670-3p, miR-320c, miR-3141, miR-148a-3p, miR-3970, miR-150-5p, miR-1306, miR-3591-3p, miR-376b-3p, miR-450b-3p, miR-19a-3p, miR-146b-5p, miR-195a-5p, miR-193b-3p, miR-495-3p, miR-211, miR-24-3p, miR-199b-5p, miR-15a, miR-133a-5p, miR-485-3p, miR-16a, novel\_87, miR-656-5p, miR-31-5p, miR-3955-5p, miR-377-5p, miR-432-5p, miR-3431, miR-185-5p, miR-149-5p, miR-432, miR-1285, miR-450c-3p, novel\_23, miR-374b-3p, miR-145a-5p, miR-16b, miR-138, miR-497-5p, miR-188-5p, miR-455-5p, miR-7862, miR-493-5p, miR-101-5p, miR-2285r, miR-539-3p, miR-345-5p, miR-224-5p, miR-146a, miR-365b-5p, miR-3141, miR-455-5p, miR-195a-5p, miR-193a-3p, miR-195a, miR-2050-5p, miR-199a-5p, miR-2285w, miR-382-3p, miR-143-3p, miR-142a-3p, miR-2285i, miR-2331-5p, miR-185-3p, miR-2957, miR-181b-5p, miR-2898, miR-548w, novel\_78, miR-133b-5p, miR-2285ad, miR-9788-3p, miR-582-3p, miR-2284h-5p, miR-142-3p, miR-181a-5p, miR-369-5p, miR-219a-1-3p, miR-2426, miR-181d-5p, novel\_101, miR-3607-3p, miR-181c-5p, miR-2284w, miR-369-5p, miR-2284q, miR-1843a-3p, miR-655-5p, miR-3068-3p, miR-3082-5p, miR-671-5p, miR-9851-3p, miR-2285k, miR-2474, miR-10b-3p, miR-3187-3p, miR-1285-5p, miR-371b-3p, miR-3074-2-3p, miR-22-5p, miR-3071-3p, miR-500a-5p, miR-33a-3p, miR-499a-3p, miR-499b-3p, miR-340-5p, novel\_68, miR-26a-2-3p, novel\_99, miR-219a-1-3p, miR-129b-5p, miR-188-3p

miR-2478, miR-380-5p, miR-148b-5p, miR-200a, miR-30a-3p, miR-3064-5p, miR-4286, miR-200c-3p, miR-127-5p, miR-181b-5p, miR-6536, miR-543-5p, novel\_96, miR-200a-3p, miR-152-3p, miR-205-5p, miR-664-3p, miR-200c, miR-219-3p, miR-3071-3p, miR-30f, miR-9-5p, miR-302a-5p, miR-758-5p, miR-6516-5p, miR-486-5p, miR-299a-3p, miR-2285ad, miR-429-3p, miR-411-3p, miR-128-3p, miR-200b-3p, miR-10a-5p, miR-345-3p, miR-3578, miR-1343-5p, miR-1197-3p, miR-1306-5p, miR-181a-2-3p, novel\_9, miR-410-3p, miR-204-5p, miR-34c-3p, miR-3969, miR-409-3p, miR-135a-5p, miR-3959-5p, miR-223-5p, miR-574-5p, miR-487a-3p, miR-215-5p, miR-141-3p, miR-345-5p, miR-2318, miR-7144-5p, miR-671-5p, miR-1248, miR-2448-3p, miR-2285r, miR-539-3p, miR-345-5p, miR-503-3p, miR-380-5p, miR-493-5p, miR-6240, miR-382, miR-668-3p, miR-378a-5p, miR-1343-5p, miR-330-3p, miR-2411-3p, miR-2285g, miR-134-3p, miR-185-5p, miR-31-5p, miR-130a-3p, miR-380-3p, miR-30b-3p, miR-873a-5p, miR-708-3p, miR-542-3p, miR-181a-5p, miR-197-3p, miR-211, miR-323c, miR-301b-3p, miR-1839-3p, miR-495-3p, miR-421-5p, miR-625-3p, miR-147-5p, miR-142b, miR-1307-5p, miR-299b-3p, miR-677, miR-181b-3p, miR-10a-5p, miR-410-5p, miR-135b-5p, miR-2285ab, miR-148a-3p, miR-1306, miR-216a-3p, miR-3591-3p, miR-421-5p, miR-181b-1-3p, miR-2424, miR-380-3p, miR-487a, miR-105-3p, miR-1277-5p, miR-221-5p, miR-299-3p, miR-196a-3p, miR-219b-5p, miR-324-3p, miR-500a-5p, miR-345-3p, miR-487a-3p, miR-7859, miR-148b-3p, miR-200b, miR-548e-3p, miR-1b-3p, miR-485-3p, miR-212-5p, miR-133a-3p, miR-148a-5p, let-7a-3p, novel\_133, miR-215-5p, miR-2408, miR-124-3p, miR-1434-5p, miR-10b-5p, miR-181c-5p, miR-539-5p, miR-145a-3p, miR-3958-5p, novel\_74, miR-6516-3p, miR-454-3p, miR-129-5p, miR-669a-3p, miR-2285j, miR-15b-3p, miR-30e-3p, miR-219b-3p, miR-30a-3p, miR-324-3p, miR-10a, miR-6516, miR-301a-3p, miR-197-5p, miR-582-5p, miR-656, miR-326, miR-193a-3p, miR-660, miR-491-5p, miR-124-5p, miR-101b-3p, miR-4791, miR-188-5p, miR-27b-3p, miR-1839-5p, miR-16-1-3p, miR-1260b, miR-29b, miR-27a-3p, miR-339-5p, miR-216a-3p, miR-3535, miR-33a-3p, miR-34c, miR-485-3p, miR-101-3p, novel\_82, miR-29a, miR-450a-5p, miR-17-3p, miR-29c-3p, miR-495-3p, miR-452-5p, miR-193b-3p, miR-3059-5p, miR-326-3p, novel\_27, miR-8095, miR-1285-5p, miR-449a, miR-877-3p, miR-211, miR-361-3p, miR-216a-3p, miR-361-3p, miR-9851-3p, miR-211-5p, miR-541-5p, miR-27a-3p, miR-34b, miR-411b-3p, novel\_69, miR-29a-3p, miR-489, miR-2483-3p, miR-499a-3p, miR-339a, miR-185-3p, miR-122-3p, miR-1260a, novel\_96, miR-34b-5p, miR-17-3p, miR-181a-2-3p, miR-450c-5p, miR-1271-3p, miR-2411, miR-2424, miR-2478, miR-330-5p, miR-29d-3p, miR-134, miR-126-3p, miR-34a-5p, miR-378d, miR-128-3p, miR-212-5p, novel\_79, novel\_121, miR-134-5p, miR-2411-5p, miR-5100, miR-29b-3p, miR-204-5p, miR-134-5p, miR-4492, miR-767-5p, miR-17-3p, miR-425-5p, miR-2330-3p, miR-338-3p, miR-1260b, miR-485-5p, miR-1248, miR-7144-5p, miR-625-5p, miR-339b, miR-767, miR-660-5p, miR-877-5p, miR-324-5p, miR-193b-3p, miR-34c-5p, miR-499b-3p

|       |                    |                                                                                                                                                                                                                                                                                                                                                                                                                                                                                                                                                                                                                                                                                                                                                                                                                                                                                                                                                                                                                                                                                                                                                                                                                                                                                                                                                                                                                                                                                                                                                                                                                                                                                                                                                                                                                                                                                                                                                                                                                                                                                                                                                                                                                                                                                                                                                                                |
|-------|--------------------|--------------------------------------------------------------------------------------------------------------------------------------------------------------------------------------------------------------------------------------------------------------------------------------------------------------------------------------------------------------------------------------------------------------------------------------------------------------------------------------------------------------------------------------------------------------------------------------------------------------------------------------------------------------------------------------------------------------------------------------------------------------------------------------------------------------------------------------------------------------------------------------------------------------------------------------------------------------------------------------------------------------------------------------------------------------------------------------------------------------------------------------------------------------------------------------------------------------------------------------------------------------------------------------------------------------------------------------------------------------------------------------------------------------------------------------------------------------------------------------------------------------------------------------------------------------------------------------------------------------------------------------------------------------------------------------------------------------------------------------------------------------------------------------------------------------------------------------------------------------------------------------------------------------------------------------------------------------------------------------------------------------------------------------------------------------------------------------------------------------------------------------------------------------------------------------------------------------------------------------------------------------------------------------------------------------------------------------------------------------------------------|
| MS4A7 | ENSOARGOC membrane | <p>miR-3068-3p, miR-30c-1-3p, miR-141-3p, miR-7689-3p, miR-216b-5p, miR-320c, miR-320a, miR-129b-3p, miR-19a-3p, miR-1291, miR-147-3p, miR-671-5p, miR-543-3p, miR-136-3p, miR-342-3p, miR-9-5p, novel_27, miR-5100, miR-147-5p, miR-2300a-5p, novel_78, miR-548w, miR-145b, miR-431, miR-3600, miR-9-5p, miR-302a-5p, miR-149-5p, miR-484, miR-873a-5p, miR-145a-5p, miR-758-3p, miR-101a-5p, miR-4429, miR-19b-3p, miR-1388-5p, miR-26a-2-3p, miR-101b-3p, miR-345-3p, miR-30c-1-3p, miR-490-3p, miR-758-3p, miR-8485, miR-2424, miR-431-5p, miR-320b, miR-342, miR-185-3p, miR-136-3p, miR-30c-2-3p, miR-466i-5p, miR-124-5p, miR-378a-5p, miR-320d, miR-1185-5p, miR-2898, miR-200a-3p</p>                                                                                                                                                                                                                                                                                                                                                                                                                                                                                                                                                                                                                                                                                                                                                                                                                                                                                                                                                                                                                                                                                                                                                                                                                                                                                                                                                                                                                                                                                                                                                                                                                                                                                 |
| LOXL3 | ENSOARGOC lysyl ox | <p>miR-148a-3p, miR-34b, miR-365a-3p, miR-323-5p, miR-323a-5p, miR-34c-5p, miR-1271, miR-370-3p, miR-4792, miR-3064-5p, novel_9, miR-17-3p, miR-4726-5p, miR-34c, miR-2440, miR-218-5p, miR-145-3p, miR-449a, miR-17-3p, miR-378d, miR-34a-5p, miR-218-2-3p, miR-223-3p, miR-196a-5p, miR-2355-3p, miR-148b-3p, miR-1343-3p, miR-3955-5p, miR-152-3p, miR-34b-5p, miR-3085-3p, miR-196b-5p, miR-17-3p, miR-6119-5p, miR-1271-3p, miR-628-5p, miR-3064-5p<br/> miR-30f, miR-18a-5p, miR-21a-3p, novel_2b, miR-204-3p, miR-139-5p, miR-323-5p, miR-182-5p, miR-660-5p, miR-140-5p, miR-17-3p, miR-450b-3p, miR-338-5p, miR-19b-1-5p, miR-338-3p, miR-6134, miR-10b-5p, miR-425-5p, miR-145a-3p, miR-539-5p, miR-1197-5p, miR-5703, miR-1193, miR-2904, miR-124-3p, novel_133, miR-3600, miR-299-3p, miR-21-3p, miR-30b-3p, miR-30d, miR-760-3p, miR-125b, miR-185-3p, miR-216a-5p, miR-2411, miR-125b-2-3p, miR-2887, miR-183-5p, miR-216c-5p, novel_94, miR-361-3p, miR-27a-3p, miR-3082-5p, miR-541-5p, miR-20a-3p, miR-3064-5p, miR-2284q, miR-4726-5p, miR-371a-5p, miR-2285y, miR-30b-5p, miR-2285n, miR-502-3p, miR-181d-5p, miR-541-3p, miR-101a-5p, miR-2426, miR-125b-2-3p, miR-4791, miR-10b, miR-484, miR-6529a, miR-216a-3p, miR-27a-3p, novel_4, miR-2300a-5p, miR-3955-3p, miR-3085-3p, miR-326, novel_103, miR-1306-5p, miR-33a-5p, miR-382-3p, miR-485-5p, miR-7144-5p, miR-23a-5p, novel_91, miR-18a, miR-3154, miR-2448-3p, miR-154b-5p, miR-3957, miR-374c-3p, miR-598-3p, miR-3957-5p, miR-31-3p, miR-331-3p, miR-5100, miR-1-5p, miR-10a-5p, miR-128-3p, miR-501-3p, miR-30a-5p, miR-218-2-3p, miR-3578, miR-345-3p, miR-483-3p, miR-2411-5p, miR-543-5p, miR-107, miR-200c-3p, miR-181b-5p, miR-450a-2-3p, miR-2898, miR-17-3p, miR-217, miR-200c, miR-1957a, miR-380-5p, miR-2478, miR-4286, miR-181a-2-3p, miR-107, miR-450b-3p, miR-18a-3p, miR-18b, miR-670-3p, miR-323a-5p, miR-10a-5p, miR-656-5p, miR-22-5p, miR-6402, miR-133a-5p, miR-502-5p, miR-326-3p, miR-17-3p, miR-495-3p, miR-455-5p, miR-219a-1-3p, miR-380-3p, miR-181a-5p, miR-1285, miR-873a-5p, miR-103, miR-185-5p, miR-26b-3p, miR-665, miR-125a-5p, miR-660, miR-455-5p, miR-345-5p, miR-363-5p, miR-130b-5p, miR-345-5p, miR-411, miR-30d-5p, miR-598-3p, miR-129b-3p, miR-450a-1-3p, miR-499b-3p, miR-377-3p, miR-10a, miR-552-3p, miR-296-3p, miR-2331-3p, miR-504-5p, miR-</p> |
| GRPR  | ENSOARGOC gastrin  | <p>miR-148a-3p, miR-34b, miR-365a-3p, miR-323-5p, miR-323a-5p, miR-34c-5p, miR-1271, miR-370-3p, miR-4792, miR-3064-5p, novel_9, miR-17-3p, miR-4726-5p, miR-34c, miR-2440, miR-218-5p, miR-145-3p, miR-449a, miR-17-3p, miR-378d, miR-34a-5p, miR-218-2-3p, miR-223-3p, miR-196a-5p, miR-2355-3p, miR-148b-3p, miR-1343-3p, miR-3955-5p, miR-152-3p, miR-34b-5p, miR-3085-3p, miR-196b-5p, miR-17-3p, miR-6119-5p, miR-1271-3p, miR-628-5p, miR-3064-5p<br/> miR-30f, miR-18a-5p, miR-21a-3p, novel_2b, miR-204-3p, miR-139-5p, miR-323-5p, miR-182-5p, miR-660-5p, miR-140-5p, miR-17-3p, miR-450b-3p, miR-338-5p, miR-19b-1-5p, miR-338-3p, miR-6134, miR-10b-5p, miR-425-5p, miR-145a-3p, miR-539-5p, miR-1197-5p, miR-5703, miR-1193, miR-2904, miR-124-3p, novel_133, miR-3600, miR-299-3p, miR-21-3p, miR-30b-3p, miR-30d, miR-760-3p, miR-125b, miR-185-3p, miR-216a-5p, miR-2411, miR-125b-2-3p, miR-2887, miR-183-5p, miR-216c-5p, novel_94, miR-361-3p, miR-27a-3p, miR-3082-5p, miR-541-5p, miR-20a-3p, miR-3064-5p, miR-2284q, miR-4726-5p, miR-371a-5p, miR-2285y, miR-30b-5p, miR-2285n, miR-502-3p, miR-181d-5p, miR-541-3p, miR-101a-5p, miR-2426, miR-125b-2-3p, miR-4791, miR-10b, miR-484, miR-6529a, miR-216a-3p, miR-27a-3p, novel_4, miR-2300a-5p, miR-3955-3p, miR-3085-3p, miR-326, novel_103, miR-1306-5p, miR-33a-5p, miR-382-3p, miR-485-5p, miR-7144-5p, miR-23a-5p, novel_91, miR-18a, miR-3154, miR-2448-3p, miR-154b-5p, miR-3957, miR-374c-3p, miR-598-3p, miR-3957-5p, miR-31-3p, miR-331-3p, miR-5100, miR-1-5p, miR-10a-5p, miR-128-3p, miR-501-3p, miR-30a-5p, miR-218-2-3p, miR-3578, miR-345-3p, miR-483-3p, miR-2411-5p, miR-543-5p, miR-107, miR-200c-3p, miR-181b-5p, miR-450a-2-3p, miR-2898, miR-17-3p, miR-217, miR-200c, miR-1957a, miR-380-5p, miR-2478, miR-4286, miR-181a-2-3p, miR-107, miR-450b-3p, miR-18a-3p, miR-18b, miR-670-3p, miR-323a-5p, miR-10a-5p, miR-656-5p, miR-22-5p, miR-6402, miR-133a-5p, miR-502-5p, miR-326-3p, miR-17-3p, miR-495-3p, miR-455-5p, miR-219a-1-3p, miR-380-3p, miR-181a-5p, miR-1285, miR-873a-5p, miR-103, miR-185-5p, miR-26b-3p, miR-665, miR-125a-5p, miR-660, miR-455-5p, miR-345-5p, miR-363-5p, miR-130b-5p, miR-345-5p, miR-411, miR-30d-5p, miR-598-3p, miR-129b-3p, miR-450a-1-3p, miR-499b-3p, miR-377-3p, miR-10a, miR-552-3p, miR-296-3p, miR-2331-3p, miR-504-5p, miR-</p> |

miR-488-3p, miR-485-5p, miR-7144-5p, miR-345-5p, miR-10b-3p, miR-2285aa, miR-2355-5p, miR-223-5p, miR-769, miR-3969, miR-6740-5p, miR-331-3p, miR-100-3p, miR-135a-1-3p, miR-204-5p, miR-374b-3p, miR-486b-3p, miR-410-3p, novel\_42, miR-378c, miR-10b-3p, miR-374a-3p, miR-323-3p, miR-23b-5p, miR-3578, miR-1290, miR-128-3p, miR-200b-3p, miR-429-3p, miR-2285ad, novel\_121, miR-378h, miR-24-2-5p, miR-30c-2-3p, miR-200c, miR-6119-5p, miR-543-5p, miR-200c-3p, miR-29b-2-5p, miR-2285b, miR-29a-5p, miR-450b-5p, miR-216a-3p, miR-3591-3p, miR-378f, miR-146b-5p, miR-7-1-3p, miR-378b, miR-3074-5p, miR-181b-3p, miR-669, novel\_69, novel\_87, miR-485-3p, miR-133a-5p, miR-502-5p, miR-4324, miR-6123, miR-128-1-5p, miR-3957-3p, novel\_120, miR-301b-3p, miR-2428, miR-24-3p, miR-211, miR-2113, miR-542-3p, miR-432, miR-455-5p, miR-2284ab, miR-130a-3p, miR-544b, miR-134-3p, miR-432-5p, miR-455-5p, miR-296-3p, miR-146a, miR-345-5p, let-7j, miR-296-3p, miR-432-3p, miR-2285r, miR-500a-3p, miR-1895, miR-345-5p, miR-532-5p, miR-21-3p, miR-140-5p, miR-30c-1-3p, miR-378a-3p, miR-2331-3p, novel\_32, miR-139-5p, miR-301a-3p, miR-544-3p, miR-29b-2-5p, miR-664a-5p, miR-500, miR-487a-5p, miR-454-3p, miR-129-5p, miR-4492, miR-3074-5p, miR-145a-3p, miR-539-5p, miR-378c, miR-6134, miR-338-3p, miR-346, miR-769-5p, miR-378a-3p, miR-140-3p, miR-2904, miR-2408, miR-1246, miR-378i, miR-378d, miR-133a-3p, miR-142-3p, miR-493-3p, miR-1b-3p, miR-200b, miR-422a, miR-185-3p, miR-324-3p, miR-210-5p, miR-195a-3p, miR-146a-5p, miR-486-3p, miR-181b-1-3p, miR-29b-1-5p, miR-664b-3p, miR-378j, miR-211-5p, miR-2285u, miR-452-3p, miR-20a-3p, miR-139-5p, miR-378e, miR-378g, miR-769-5p, miR-2285n, novel\_82, miR-374a-3p, miR-490-5p, miR-499a-5p, miR-3968, miR-3059-5p, novel\_111, miR-378b, miR-296-5p, miR-21b, miR-16-2-3p, miR-450b-5p, miR-2426, miR-544a, miR-

miR-147a, miR-27a-3p, miR-145b, miR-1343-3p, miR-409b, novel\_4, novel\_78, miR-105-1, miR-125b-2-3p, miR-301b-5p, miR-541, miR-2284r, miR-484, miR-1388-3p, miR-199b-5p, miR-130b-3p, miR-487b-5p, miR-491-5p, miR-326, miR-4443, miR-27a-3p, miR-489, miR-378g, miR-499a-3p, miR-211-5p, miR-668-5p, miR-199b-5p, miR-361-3p, miR-140-5p, miR-452-5p, miR-541-3p, miR-2447, miR-3059-5p, miR-4726-5p, miR-301a-5p, miR-615, miR-532-3p, miR-148b-3p, miR-3600, miR-378d, miR-1197-5p, miR-5703, miR-193b-5p, miR-2300b-3p, miR-345-3p, miR-2887, miR-185-3p, miR-324-3p, novel\_17, miR-204-3p, miR-193b-3p, miR-27a-5p, miR-499b-3p, miR-3065-3p, miR-1827, novel\_99, miR-885-3p, miR-625-5p, miR-129b-3p, miR-6134, miR-6525, miR-665-5p, miR-145a-3p, miR-130b-5p, miR-454-3p, miR-874-5p, miR-4492, miR-664a, miR-17-3p, novel\_74, miR-665, miR-134-3p, miR-130a-3p, miR-27b-3p, miR-7862, miR-145a-5p, miR-374b-3p, miR-1285, miR-2113, miR-382, miR-130b-5p, miR-193a-3p, novel\_51, miR-105-5p, miR-374c-3p, miR-9851-3p, miR-1291, miR-216a-3p, miR-148a-3p, miR-2428, miR-199b-5p, miR-326-3p, miR-24-3p, miR-211, miR-17-3p, miR-193b-3p, miR-3957-3p, miR-6517, miR-105-2, miR-128-3p, miR-885-3p, miR-330-5p, miR-23b-5p, miR-2427, miR-615-3p, novel\_39, miR-3065-3p, miR-199a-5p, miR-376c-5p, miR-376b-5p, miR-152-3p, novel\_96, miR-450a-2-3p, miR-2898, miR-17-3p, miR-199a-5p, miR-223-5p, miR-3959-5p, miR-2355-5p, miR-671-5p, miR-1248, miR-7144-5p, miR-23a-5p, miR-3154, miR-1197-3p, novel\_42, miR-204-5p, miR-100-3p, miR-331-3p, miR-34a-5p, miR-501-3p, miR-2427, miR-218-2-3p, miR-29d-3p, miR-2284z, miR-23c, miR-23b-3p, miR-376a-5p, miR-34b-5p, miR-760-3p, miR-2284m, miR-3071-3p, miR-324-3p, miR-6119-5p, miR-2284a, miR-3065-3p, miR-2284y, miR-486-3p, miR-195a-3p, miR-29b-2-5p, miR-216c-5p, miR-186-5p, miR-7144-5p, novel\_91, miR-345-5p, miR-345-5p, miR-23b, miR-2284n, novel\_25, miR-204-3p, miR-323-5p, miR-301a-3p, miR-544-3p, miR-34c-5p, miR-3065-3p, miR-545-3p, miR-140-5p, miR-204-5p, miR-486b-3p, miR-454-3p, miR-1468-5p, miR-664a-5p, miR-29b-2-5p, miR-331-3p, miR-34c-3p, miR-15b-3p, miR-29b-3p, miR-2284k, miR-6134, miR-224-5p, miR-6128, miR-3184-3p, miR-2284v, miR-1306-5p, miR-2284x, miR-188-5p, miR-1839-5p, miR-2284aa, miR-125b-1-3p, miR-544a, miR-2284ab, miR-29b, miR-1388-5p, miR-197-3p, miR-501-3p, miR-301b-5p, miR-7b-5p, miR-484, miR-653, miR-2459, miR-9788-3p, miR-1298-3p, miR-2284d, miR-130a-3p, miR-1468, miR-130b-3p, miR-378a-5p, miR-1306-5p, miR-224-5p, miR-7-5p, miR-345-5p, miR-652-5p, miR-2284b, miR-23a-3p, miR-376a-2-5p, miR-668-5p, miR-136-5p, miR-378b, miR-3065-5p, miR-150-5p, miR-1306, miR-361-3p, miR-140-5p, miR-500-3p, miR-29a-3p, miR-34b, miR-3596, miR-323a-5p, miR-211-5p, miR-7-1-3p, miR-2319b, miR-22-5p, miR-29a, miR-301a-5p, miR-371a-5p, miR-34c, miR-301b-3p, miR-2284w, miR-449a, miR-502-3p, miR-3959-3p, novel\_111, miR-361-3p, miR-211, miR-219a-5p, miR-29c-3p, miR-2284j, miR-2447

CDK2AP2 ENSOARGO(cyclin-d)

CASP7 ENSOARGO(caspase)

miR-654-3p, miR-8485, miR-106a-5p, miR-382-3p, miR-2330-5p, miR-2483-5p, miR-23a-3p, miR-3955-3p, miR-224-5p, miR-377-3p, miR-106b-5p, miR-17-5p, miR-106a-5p, miR-3535, miR-134-3p, miR-1298-3p, miR-194-3p, miR-20b, miR-31-5p, miR-145b, miR-299a-5p, miR-2284aa, miR-4791, miR-197-3p, novel\_23, miR-145a-5p, novel\_111, miR-17-3p, miR-625-3p, novel\_82, miR-20a-5p, miR-33a-3p, miR-7857-3p, miR-499a-3p, miR-378g, miR-3082-5p, miR-374c-3p, miR-3074-5p, miR-7689-3p, miR-3963, miR-668-5p, miR-2284e, miR-376a-5p, miR-2478, miR-125b-2-3p, miR-2432, miR-2411, miR-2424, miR-143-3p, miR-490-3p, miR-20a, miR-30a-3p, miR-195a-3p, miR-2887, miR-17-3p, miR-106a, miR-216a-5p, miR-500a-5p, miR-487a-3p, miR-2411-5p, novel\_83, miR-2284z, miR-545-5p, miR-548e-3p, miR-106a, miR-7641, miR-30d-3p, miR-485-3p, miR-140-3p, miR-93, miR-224-5p, miR-3074-5p, miR-425-5p, miR-17-3p, miR-551b-3p, miR-30e-3p, miR-30a-3p, miR-338-5p, miR-665, miR-3604, miR-499b-3p, miR-377-3p, miR-582-5p, miR-877-5p, miR-154b-5p, let-7g-3p, miR-10b-3p, miR-329b, miR-20b-5p, miR-186-5p, miR-1248, miR-488-3p, miR-93-5p, miR-17-5p, miR-431-3p, miR-22-3p, miR-497-5p, miR-16b, miR-18a-3p, miR-103a-3p, miR-151-5p, miR-9788-3p, miR-103, miR-322-5p, miR-412-5p, miR-15a-5p, miR-324-3p, miR-16b, miR-146a, miR-1306-5p, miR-146b, miR-107, novel\_127, miR-424-5p, miR-146a-5p, miR-1306, miR-18a-3p, miR-1895, miR-146b-5p, miR-195a-5p, miR-107, miR-22-3p, miR-151b, miR-15b-5p, miR-132-5p, miR-16a, miR-15a, miR-6529b, miR-424-5p, miR-16-5p, miR-877-3p, miR-346, miR-22-5p, miR-2284q, miR-20a-5p, miR-107-5p, miR-877-3p, miR-423-5p, miR-2428, miR-2447, miR-3059-5p, miR-17-3p, miR-136-5p, miR-504, miR-493-5p, miR-146b-5p, novel\_94, miR-148a-3p, miR-2387, miR-18a-3p, miR-21c, miR-7857-3p, novel\_69, miR-669, miR-677, miR-4443, miR-181b-3p, miR-3064-5p, miR-452-3p, miR-499b-5p, miR-2285u, miR-10a-5p, miR-7977, miR-378a-5p, miR-3085-3p, miR-146b, miR-452-5p, miR-125a-5p, miR-103a-2-5p, miR-7-5p, miR-146a, miR-296-3p, miR-365b-5p, miR-17-5p, miR-106b-5p, miR-106a-5p, miR-296-3p, miR-106a-5p, miR-628-5p, miR-21-5p, miR-16-1-3p, miR-873a-5p, miR-2284r, miR-1434-3p, miR-10b, miR-7b-5p, miR-496-5p, miR-147a, miR-455-3p, miR-20b, miR-2300a-5p, miR-181b-2-3p, miR-26b-3p, novel\_9, miR-17-3p, miR-4492, miR-2285j, miR-125b-5p, miR-324-3p, miR-664a-5p, miR-655-3p, miR-10b-5p, miR-93, miR-3184-5p, miR-365a-5p, miR-193a-5p, miR-20b-5p, miR-7144-5p, miR-485-5p, miR-1248, miR-93-5p, miR-655, miR-17-5p, miR-2284s, miR-10a, miR-6516, miR-204-3p, miR-3957, miR-3957-5p, miR-2331-3p, miR-504-5p, miR-874-3p, miR-2355-5p, miR-552-3p, miR-296-3p, miR-125a, miR-106a, miR-17-3p, miR-152-3p, novel\_127, miR-324-3p, miR-125b, miR-185-3p, miR-181b-1-3p, novel\_39, miR-1957a, miR-146a-5p, miR-143-3p, miR-3064-5p, miR-20a, miR-345-3p, miR-16-1-3p, miR-10a-5p, miR-1434-5p, miR-148b-3p, miR-6516-5p, miR-18a-3p, miR-106a, miR-196a-2-3p



|       |                     |                                                                                                                                                                                                                                                                                                                                                                                                                                                                                                                                                                                                                                                                                                                                                                                                                                                                                                                                                                                                                                                                                                                                                                                                                                                                                                                                                                                                                                                                                                                                                                                                                                                                                                                                                                                                                                                                                                            |
|-------|---------------------|------------------------------------------------------------------------------------------------------------------------------------------------------------------------------------------------------------------------------------------------------------------------------------------------------------------------------------------------------------------------------------------------------------------------------------------------------------------------------------------------------------------------------------------------------------------------------------------------------------------------------------------------------------------------------------------------------------------------------------------------------------------------------------------------------------------------------------------------------------------------------------------------------------------------------------------------------------------------------------------------------------------------------------------------------------------------------------------------------------------------------------------------------------------------------------------------------------------------------------------------------------------------------------------------------------------------------------------------------------------------------------------------------------------------------------------------------------------------------------------------------------------------------------------------------------------------------------------------------------------------------------------------------------------------------------------------------------------------------------------------------------------------------------------------------------------------------------------------------------------------------------------------------------|
| CFP   | ENSOARGO( compleme: | miR-216a-3p, miR-204-3p, miR-483-3p, miR-429-3p, miR-1343-3p, miR-485-5p, miR-128-3p, miR-140-3p, miR-216a-3p, miR-29a-5p, miR-181a-2-3p, miR-4286, miR-452-5p, miR-2447, miR-874-5p, miR-200c-3p, miR-191-3p, miR-483-3p, miR-210-5p                                                                                                                                                                                                                                                                                                                                                                                                                                                                                                                                                                                                                                                                                                                                                                                                                                                                                                                                                                                                                                                                                                                                                                                                                                                                                                                                                                                                                                                                                                                                                                                                                                                                      |
| HK2   | ENSOARGO( hexokina  | miR-15b-5p, miR-322-5p, miR-15a-5p, miR-3074-5p, miR-497-5p, miR-101c, miR-195a-5p, miR-16b, let-7j, miR-2285b, miR-16-5p, novel_120, miR-3074-5p, miR-424-5p, miR-424-5p, miR-628-3p, miR-16a, miR-16b, miR-15a                                                                                                                                                                                                                                                                                                                                                                                                                                                                                                                                                                                                                                                                                                                                                                                                                                                                                                                                                                                                                                                                                                                                                                                                                                                                                                                                                                                                                                                                                                                                                                                                                                                                                           |
| SMC5  | ENSOARGO( structur: | miR-200c-3p, miR-491-5p, novel_127, novel_96, miR-200a-3p, miR-660, miR-3071-3p, miR-30c-2-3p, miR-450b-5p, miR-30c-1-3p, miR-2284y, miR-2284b, miR-195a-3p, miR-2284u, miR-188-5p, miR-2284x, miR-1434-3p, miR-2459, novel_4, miR-548w, miR-429-3p, miR-18a-3p, miR-3964, miR-1197-3p, miR-3074-5p, miR-3607-3p, miR-9-3p, miR-7975, miR-23a-5p, miR-18a-3p, miR-3074-5p, miR-216b-3p, miR-660-5p, miR-30c-1-3p, miR-2284g, miR-141-3p, miR-126b-5p, miR-216b-3p                                                                                                                                                                                                                                                                                                                                                                                                                                                                                                                                                                                                                                                                                                                                                                                                                                                                                                                                                                                                                                                                                                                                                                                                                                                                                                                                                                                                                                          |
| CDH18 | ENSOARGO( cadherin  | miR-877-5p, miR-6516, miR-132-5p, miR-139-5p, miR-21-3p, miR-140-5p, miR-545-3p, miR-2312, miR-338-3p, miR-206-3p, miR-208b-5p, miR-424-5p, miR-450b-3p, miR-17-3p, miR-19b-1-5p, miR-324-3p, miR-29b-2-5p, miR-222-3p, miR-383-5p, miR-148b-3p, miR-15a-5p, miR-19b-3p, miR-4429, miR-2904, miR-215-5p, miR-1246, miR-2300b-3p, miR-29b-1-5p, miR-130a-5p, miR-20a, miR-216c-5p, miR-30b-3p, miR-320d, miR-106a, miR-466i-5p, miR-125b, miR-185-3p, miR-7857-3p, miR-541-5p, miR-499b-5p, miR-664b, miR-877-3p, miR-362-5p, miR-2285f, miR-181d-5p, miR-452-5p, miR-3059-5p, miR-374a-3p, miR-2285t, miR-3958-3p, miR-2285y, miR-107-5p, miR-2285n, miR-500-5p, miR-221-3p, miR-222-5p, miR-2284aa, miR-16-2-3p, miR-3120-5p, miR-450b-5p, miR-412-3p, miR-125b-2-3p, miR-4791, miR-382-3p, miR-106a-5p, miR-424-5p, miR-3955-3p, miR-320b, miR-1306-5p, miR-374c-3p, miR-141-3p, miR-215-5p, miR-3074-1-3p, miR-7144-5p, miR-376c-5p, miR-671-5p, let-7g-3p, miR-17-5p, miR-320a, miR-362-5p, miR-503-3p, miR-500b-5p, miR-93, miR-374a-3p, miR-3607-3p, miR-6128, miR-374b-3p, miR-204-5p, miR-331-3p, miR-3969, miR-582-3p, miR-545-5p, miR-214-5p, miR-6516-5p, miR-222, miR-128-3p, miR-411-3p, miR-490-3p, miR-29b-2-5p, miR-1, miR-181a-2-3p, miR-3529-3p, miR-107, miR-450a-2-3p, miR-17-3p, miR-181b-5p, miR-2285af, miR-670-3p, miR-655-5p, miR-320b, miR-195a-5p, miR-19a-3p, miR-107, miR-378b, miR-2285ab, miR-211, miR-17-3p, miR-2285x, miR-495-3p, miR-203b-5p, miR-199c, novel_1, miR-16a, miR-33a-3p, miR-502-5p, miR-15a, miR-20a-5p, miR-103, miR-20b, miR-432-5p, miR-130a-3p, miR-26b-3p, miR-377-5p, miR-219a-1-3p, miR-3071-5p, miR-873a-5p, miR-1434-3p, miR-181a-5p, miR-654-3p, miR-382, miR-130b-5p, miR-125a-5p, miR-452-5p, miR-466f-3p, miR-330-3p, miR-17-5p, miR-106a-5p, miR-224-5p, miR-15b-5p, miR-301a-3p, miR-625-5p, miR-543-3p, miR-186-5p, miR-432-3p, miR-450a- |

miR-34b-5p, miR-628-5p, miR-130b-5p, miR-1343-5p, miR-125a-5p, miR-378a-5p, miR-103, miR-544b, miR-194-3p, miR-149-5p, miR-134-3p, miR-339-5p, miR-103a-3p, miR-340-3p, miR-138, miR-22-3p, miR-326-3p, miR-371b-3p, miR-17-3p, miR-1839-3p, miR-576-3p, miR-28c, miR-4324, miR-323a-5p, miR-10a-5p, miR-320b, miR-378b, miR-107, miR-1291, miR-216a-3p, miR-18a-3p, miR-1306, miR-1271-3p, miR-3065-3p, miR-28b, miR-4286, miR-3064-5p, novel\_127, miR-543-5p, novel\_96, miR-107, miR-127-5p, miR-17-3p, miR-217, miR-339a, miR-125a-3p, miR-134-5p, miR-582-3p, miR-9-5p, miR-431, miR-412, novel\_79, miR-1224-5p, miR-10a-5p, miR-128-3p, miR-330-5p, miR-1343-5p, miR-134, miR-1306-5p, miR-486b-3p, miR-134-5p, miR-28-5p, miR-138-5p, miR-125b-5p, miR-2433, miR-324-5p, miR-133c, miR-125a, miR-615-5p, miR-215-5p, miR-2355-5p, miR-370-3p, miR-874-3p, miR-574-5p, miR-23a-5p, miR-345-5p, miR-301, miR-2330-5p, miR-1839-3p, miR-214-3p, miR-3085-3p, miR-491-5p, miR-326, miR-1306-5p, miR-431-5p, miR-216a-3p, miR-9788-3p, miR-222-5p, miR-2300a-5p, miR-1343-3p, miR-3120-5p, miR-544a, miR-412-3p, miR-10b, miR-541, miR-301b-5p, miR-877-3p, miR-9-5p, miR-541-3p, miR-3956-3p, novel\_60, miR-4726-5p, miR-301a-5p, miR-378g, miR-7977, miR-452-3p, miR-139-5p, miR-4792, miR-3064-5p, miR-877-3p, miR-136-5p, miR-504, miR-486-3p, miR-130a-5p, miR-345-3p, miR-21-3p, miR-221-5p, miR-185-3p, miR-125b, miR-324-3p, novel\_17, miR-210-5p, novel\_83, miR-1247-5p, miR-212-5p, miR-18a-3p, miR-378d, miR-218-1-3p, miR-1197-5p, miR-5703, miR-217-5p, miR-2904, miR-215-5p, novel\_133, miR-122-5p, miR-6525, miR-10b-5p, miR-214, miR-130b-5p, miR-4492, miR-874-5p, miR-708-5p, miR-17-3p, miR-320e, miR-22-3p, miR-323-5p, miR-139-5p, miR-192-5p, miR-544-3p, miR-10a, miR-552-3p, miR-3065-3p, miR-2331-3p, miR-504-5p, miR-221-5p, miR-

miR-365a-5p, miR-3969, miR-135a-5p, miR-26c, miR-2332, miR-486b-3p, miR-28-5p, novel\_9, miR-141-3p, miR-370-3p, miR-223-5p, miR-324-5p, miR-769, miR-34c-5p, miR-17-5p, miR-93-5p, miR-381-3p, miR-671-5p, miR-20b-5p, miR-7144-5p, miR-10b-3p, miR-490-3p, miR-200a, miR-200c, miR-2285af, miR-200a-3p, miR-200c-3p, miR-7641, miR-429-3p, miR-345-3p, miR-200b-3p, miR-300, miR-582-3p, miR-135a-2-3p, miR-2428, miR-449a, miR-34c, miR-576-3p, miR-20a-5p, miR-147-5p, miR-655-5p, miR-216b-3p, miR-669, miR-34b, miR-323a-5p, miR-2404, miR-2387, miR-135b-5p, miR-450b-3p, miR-410-5p, miR-455-5p, miR-106a-5p, miR-17-5p, miR-2411-3p, miR-197-5p, miR-365b-5p, miR-7-5p, miR-224-5p, miR-31-5p, miR-194-3p, miR-185-5p, miR-134-3p, miR-3431, miR-2285g, miR-194-5p, miR-1285, miR-7b-5p, miR-542-3p, miR-1843b-5p, miR-708-3p, miR-455-5p, miR-188-5p, miR-2889, miR-665-5p, miR-3958-5p, miR-145a-3p, miR-4510, miR-224-5p, miR-769-5p, miR-664a-5p, miR-665, miR-130b-5p, miR-4492, miR-708-5p, miR-296-3p, miR-552-3p, miR-204-3p, miR-6130, miR-323-5p, miR-2284s, miR-129b-3p, miR-2285c, miR-1827, miR-20a, miR-2285w, miR-216c-5p, miR-329a-5p, miR-143-3p, miR-486-3p, miR-130a-5p, miR-376a-5p, miR-185-3p, miR-345-3p, miR-92a-1-5p, novel\_17, miR-34b-5p, miR-106a, miR-1b-3p, miR-106a, miR-2284h-5p, miR-200b, miR-5703, miR-188-3p, miR-2904, miR-2300b-3p, miR-34a-5p, miR-452-5p, miR-194b-5p, miR-541-3p, miR-2447, miR-769-5p, miR-2440, novel\_82, miR-218-5p, miR-499a-5p, miR-3082-5p, miR-378g, miR-378j, miR-744-3p, miR-106a-5p, miR-1388-3p, miR-4532, miR-8485, miR-505, novel\_103, miR-153-3p, miR-1185-5p, miR-2459, miR-2285e, miR-216a-3p, miR-9788-3p, miR-148b-5p, miR-147a, miR-153, miR-541, miR-2284r, miR-484, miR-2426, miR-1388-5p, miR-128-1-5p, miR-668-5p, miR-330-3p, novel\_133, miR-4324, novel\_17, miR-193b-5p, miR-6529b, miR-122-5p, miR-1271, miR-340-3p, miR-6240, miR-330-3p, miR-329a, miR-1827, miR-544-5p, miR-21a-3p, miR-21c, miR-3965, miR-216b-5p, miR-2404, miR-500-3p, miR-204-3p, miR-3120-3p, miR-141-3p, miR-7-1-3p, miR-552-3p, miR-2355-5p, miR-664a, miR-6119-3p, miR-147-5p, miR-2332, miR-576-3p, miR-320e, miR-1197-3p, miR-877-3p, miR-2428, miR-502-3p, miR-2447, novel\_120, miR-539-5p, miR-3607-3p, miR-16-1-3p, miR-21-5p, miR-362-3p, miR-3120-5p, miR-16-1-3p, miR-223-3p, miR-362-3p, miR-1290, miR-329-3p, miR-145a-5p, miR-501-3p, miR-124-3p, miR-501-3p, miR-7857, miR-147a, miR-2459, miR-9788-3p, novel\_83, miR-616-3p, miR-532-3p, miR-145b, miR-124-5p, miR-200a-3p, miR-452-5p, miR-125a-3p, novel\_51, miR-362-3p, miR-2310, miR-1b-5p, miR-2432, miR-200a, miR-494-3p, miR-124a, miR-1388-3p

miR-124-5p, miR-190a, miR-330-3p, miR-2411-3p, miR-224-5p, miR-146a, let-7j, miR-2285r, miR-628-5p, miR-130b-5p, miR-6240, miR-497-5p, miR-30b-3p, miR-138, miR-380-3p, miR-16b, miR-219a-1-3p, miR-450c-3p, miR-145a-5p, miR-374b-3p, miR-432, miR-873a-5p, miR-708-3p, miR-1434-3p, miR-542-3p, miR-1843b-5p, miR-411-5p, miR-412-5p, miR-432-5p, miR-185-5p, miR-339-5p, miR-26b-3p, miR-31-5p, miR-147-5p, miR-199c, novel\_1, miR-16a, miR-502-5p, miR-15a, miR-576-3p, miR-6402, miR-2428, miR-2284w, miR-3959-3p, miR-335-5p, miR-2319a, miR-378f, miR-195a-5p, miR-379-5p, miR-450b-3p, miR-3591-3p, miR-216a-3p, miR-2285ab, miR-320c, miR-677, miR-181b-3p, miR-670-3p, miR-320b, novel\_68, miR-378b, miR-3074-5p, miR-329-5p, miR-200a-3p, novel\_96, miR-28-3p, miR-200c-3p, miR-6536, miR-3071-3p, miR-339a, miR-6119-5p, miR-200c, miR-125a-3p, miR-29a-5p, miR-200a, miR-2284y, miR-2284a, miR-2285b, miR-24-2-5p, miR-2385-3p, miR-128-3p, miR-3591-5p, miR-345-3p, miR-450a-1-3p, miR-322-5p, miR-24-2-5p, miR-505-5p, miR-378h, miR-6516-5p, miR-412, novel\_79, miR-2285ad, miR-429-3p, miR-31-3p, miR-28-5p, miR-138-5p, miR-5100, miR-378c, miR-500b-5p, miR-16-5p, miR-6128, miR-28a-3p, miR-7144-5p, miR-485-5p, miR-1814c, miR-876-3p, miR-329b, miR-362-5p, miR-320a, miR-3154, miR-301, miR-133c, miR-2355-5p, miR-2285aa, miR-615-5p, miR-141-3p, miR-874-3p, miR-503-3p, miR-153-3p, miR-491-5p, miR-16b, miR-320b, novel\_103, miR-2310, miR-378d, miR-2284b, miR-744-3p, miR-424-5p, miR-101c, miR-378c, miR-450b-5p, miR-412-3p, miR-30b-3p, miR-378b, miR-6529a, miR-301b-5p, miR-500-5p, miR-216a-3p, miR-455-3p, miR-2459, miR-421, miR-153, miR-142-5p, miR-222-5p, miR-145b, miR-181b-2-3p, miR-1343-3p, miR-199b-3p, miR-330-3p, miR-3958-3p, miR-3968, miR-628-3p, miR-499a-5p, miR-335 miR-301a-5p miR-2285n miR-2440 miR-101-3p miR-362 miR-125a-3p, miR-664-3p, miR-181c-3p, miR-339a, novel\_39, miR-143-3p, miR-450c-5p, miR-2285b, miR-329a-5p, miR-503-5p, miR-30a-3p, miR-369-3p, miR-4286, miR-2403, miR-300, miR-1290, miR-1246, miR-29d-3p, miR-1197-5p, miR-23c, novel\_121, novel\_79, miR-412, miR-30d-3p, miR-29b-3p, miR-34c-3p, miR-30e-3p, miR-144, miR-324-3p, miR-30a-3p, miR-655-3p, miR-135a-5p, miR-323-3p, miR-145-3p, miR-338-3p, miR-3184-3p, miR-339b, miR-381-3p, miR-655, miR-2284s, miR-370-3p, miR-503-5p, miR-330-3p, novel\_51, miR-4532, miR-1388-3p, miR-493-5p, miR-6240, miR-101b-3p, miR-2330-5p, miR-29b, miR-1839-5p, miR-873a-5p, miR-296-5p, miR-541, miR-412-3p, novel\_23, miR-425-3p, miR-503-5p, miR-3431, miR-2459, novel\_4, miR-330-3p, miR-339-5p, miR-26b-3p, miR-628-3p, miR-128-1-5p, miR-335, miR-450a-5p, miR-29a, miR-421-5p, miR-142b, miR-24-3p, miR-3059-5p, miR-541-3p, miR-335-5p, miR-29c-3p, miR-299b-5p, miR-493-5p, miR-2319a, miR-135b-5p, miR-25, miR-29a-3p, miR-144-3p, miR-664b, miR-2319b, miR-329-5p, miR-20a-3p, miR-3120-3p miR-200c-3p, miR-2285t, miR-200b-3p, miR-200c, miR-374a-5p, miR-2404, miR-9-5p, miR-200b, miR-216b-5p, novel\_32, miR-429-3p, miR-7641, miR-9-5p

RABEPK

ENSOARGO(Rab9 eff

CA2

ENSOARGO(carbonic

SPACA1

ENSOARGO(sperm ac

miR-1434-5p, miR-664-5p, miR-361-5p, miR-2284u, miR-30d-3p, miR-18a-3p, miR-2284h-5p, miR-2285p, miR-3653-3p, miR-2484, miR-329a-5p, miR-2285w, miR-421-5p, miR-377-5p, miR-129b-3p, miR-411, miR-186-5p, miR-339b, miR-30c-1-3p, miR-504-5p, miR-15b-5p, miR-377-3p, miR-301a-3p, miR-30a-3p, miR-3604, miR-665, miR-15b-3p, miR-30e-3p, miR-454-3p, miR-4492, novel\_74, miR-665-5p, miR-129-2-3p, miR-3074-5p, miR-181c-5p, miR-142a-5p, miR-224-5p, miR-501-3p, miR-1a-3p, miR-323b, miR-301b-5p, miR-1388-5p, miR-145b, miR-330-3p, miR-548w, novel\_78, miR-455-3p, miR-421, miR-2459, miR-142-5p, miR-539-5p, miR-323b-3p, miR-16b, miR-182-5p, miR-199a-3p, miR-199b-5p, miR-146b, miR-103a-2-5p, miR-2284b, miR-124a, miR-378j, miR-1983, miR-504, miR-2284g, miR-2319b, miR-144-5p, miR-500-3p, miR-301a-5p, miR-2440, miR-499a-5p, miR-6527, miR-9-5p, miR-2447, miR-361-3p, miR-877-3p, novel\_79, miR-18b-5p, miR-429-3p, miR-134-5p, miR-129-1-3p, miR-9-5p, miR-322-5p, miR-505-5p, miR-758-5p, miR-205-5p, novel\_127, miR-200a-3p, miR-2284y, miR-200a, miR-29a-5p, miR-2285b, miR-450b-5p, miR-1248, miR-1271, miR-574-5p, miR-223-5p, miR-3959-5p, miR-2433, miR-3432a, miR-134-5p, miR-16-5p, miR-144-5p, miR-197-3p, miR-542-3p, miR-497-5p, miR-188-5p, miR-16b, miR-339-5p, miR-31-5p, miR-365b-5p, novel\_51, miR-296-3p, miR-146a, miR-377-3p, let-7f-2-3p, let-7f-2-3p, miR-380-5p, miR-6240, let-7a-2-3p, miR-2284l, miR-3970, miR-146b-5p, miR-2319a, miR-412-3p, miR-3074-5p, miR-329-5p, miR-320c, miR-144-3p, novel\_87, miR-4324, miR-142b, miR-421-5p, miR-6123, miR-29a, miR-206, miR-29c-3p, miR-301b-3p, miR-199b-5p, miR-2284w, miR-2904, miR-124-3p, miR-1197-5p, miR-5703, miR-188-3p, miR-140-3p, novel\_133, miR-19b-3p, miR-4429, miR-3600, miR-485-3p, miR-505-3p, miR-199a-3p, miR-487a-3p, miR-222-5p, miR-340-5p, miR-15a-5p, miR-200b, miR-185-

miR-1260b, miR-16-5p, miR-193a-5p, miR-2284v, miR-134-5p, miR-191-5p, miR-6740-5p, miR-125b-5p, miR-2433, miR-2284k, miR-300-3p, miR-125a, miR-2285aa, miR-20b-5p, miR-345-5p, miR-2318, miR-23b, miR-93-5p, miR-301, miR-30e-5p, let-7g, miR-3064-5p, let-7f-5p, miR-30f, miR-450a-1-3p, miR-134-5p, miR-322-5p, miR-505-5p, miR-412, novel\_79, miR-6517, miR-2285ad, miR-299a-3p, miR-30c, miR-330-5p, miR-23b-5p, miR-1343-5p, miR-196a-5p, miR-199b-5p, miR-1839-3p, miR-379-3p, miR-485-3p, miR-576-3p, miR-4324, miR-181b-3p, miR-677, miR-320c, miR-669, miR-411b-3p, novel\_69, miR-374c-3p, miR-299b-3p, miR-3074-5p, novel\_68, let-7e-5p, miR-2319a, miR-412-3p, miR-3591-3p, miR-150-5p, miR-3141, let-7j, let-7f-2-3p, let-7f-2-3p, miR-493-5p, miR-6240, miR-196b-5p, miR-378a-5p, novel\_51, miR-2411-3p, miR-3141, miR-296-3p, novel\_116, miR-194-3p, miR-149-5p, miR-134-3p, miR-339-5p, miR-103a-3p, miR-4508, miR-497-5p, miR-369-5p, miR-16b, miR-450c-3p, miR-1843b-5p, miR-432, miR-181c-5p, miR-122-5p, miR-3184-5p, miR-3074-5p, miR-3184-3p, let-7b, miR-500, miR-874-5p, miR-129-5p, miR-4492, miR-487b-5p, novel\_74, miR-664a-5p, miR-665, miR-30a-3p, miR-30e-3p, let-7f, miR-2285j, miR-15b-5p, let-7i-5p, miR-499b-3p, miR-10a, miR-582-5p, miR-30c-1-3p, miR-1827, miR-625-5p, miR-543-3p, miR-1895, miR-339b, miR-345-5p, miR-30d-5p, miR-500a-3p, miR-450a-1-3p, miR-486-3p, miR-181b-1-3p, miR-376a-5p, miR-345-3p, let-7k, miR-98-5p, miR-345-3p, miR-3601, novel\_17, miR-210-5p, miR-618, miR-30b, miR-328-3p, miR-7859, miR-23b-3p, miR-30d-3p, miR-106a, miR-34a-5p, miR-133a-3p, miR-493-3p, miR-217-5p, miR-1961, miR-30c-5p, miR-191, miR-423-5p, miR-2284j, miR-3956-3p, miR-885-5p, miR-2447, miR-218-5p, novel\_82, miR-1185-2-3p, miR-652-3p, miR-2483-3p, miR-378a, miR-100a-3p, miR-130-5p, miR-1082, miR-103-5p, miR-200b-

miR-134, miR-34b-3p, miR-214-5p, miR-582-3p, miR-6516-5p, miR-339a, miR-30c-2-3p, miR-2285af, miR-376b-3p, miR-543-5p, miR-181b-5p, miR-2284a, miR-17-5p, miR-488-3p, miR-141-3p, miR-215-5p, miR-487a-3p, miR-154b-5p, miR-3969, miR-135a-5p, miR-204-5p, miR-486b-3p, miR-103b, miR-323-3p, miR-93, miR-3071-5p, miR-1434-3p, miR-181a-5p, miR-219a-1-3p, miR-30b-3p, miR-2284ab, miR-130a-3p, miR-20b, miR-2355-3p, miR-2285g, miR-2284d, miR-17-5p, miR-106a-5p, miR-660, miR-1343-5p, miR-2483-5p, miR-382, miR-101-5p, miR-539-3p, miR-296-3p, miR-376b-3p, miR-135b-5p, miR-6516-3p, miR-7975, miR-7-1-3p, miR-378b, miR-6402, miR-133a-5p, miR-6529b, miR-20a-5p, miR-502-5p, miR-147-5p, miR-203b-5p, novel\_1, miR-2285x, novel\_120, miR-219b-3p, miR-2428, miR-326-3p, novel\_27, miR-211, miR-188-3p, miR-5703, miR-1193, miR-215-5p, miR-378d, miR-485-3p, miR-1b-3p, miR-3600, miR-532-3p, miR-148b-3p, miR-487a-3p, miR-185-3p, miR-216a-5p, miR-196a-3p, miR-221-5p, miR-760-3p, miR-2284m, miR-106a, miR-20a, novel\_99, miR-154b-3p, miR-182-5p, miR-21-3p, miR-660-5p, miR-221-5p, novel\_32, miR-193b-3p, miR-6516, miR-192-5p, miR-338-5p, miR-19b-1-5p, miR-208b-5p, miR-6516-3p, miR-425-5p, miR-539-5p, miR-30b-3p, miR-125b-2-3p, miR-7857, miR-484, miR-2284aa, miR-450b-5p, miR-101a-5p, miR-299a-5p, miR-5010-3p, novel\_4, miR-2285e, miR-216a-3p, miR-9788-3p, novel\_103, miR-326, miR-3955-3p, miR-33a-5p, miR-106a-5p, miR-1839-3p, miR-193a, miR-30c-1-3p, miR-129b-5p, novel\_94, miR-877-3p, miR-499b-5p, miR-541-5p, miR-664b, miR-376d, miR-2285t, miR-181d-5p, miR-1296-5p, miR-212-3p, miR-8095, miR-9-3p, miR-330-5p, miR-1343-5p, novel\_79, miR-129-1-3p, miR-134-5p, miR-2284z, miR-9-5p, miR-664-3p, miR-205-5p, miR-152-3p, miR-200a-3p, novel\_96, miR-28-3p, miR-29a-5p, miR-2284v, novel\_39, miR-200a, miR-148b-5p, miR-93-5p, miR-

miR-155-5p, miR-664a, novel\_74, miR-450b-3p, miR-130b-5p, miR-4492, miR-129-5p, miR-2285j, miR-665, miR-29b-2-5p, miR-664a-5p, miR-324-3p, miR-19b-1-5p, miR-206-3p, miR-346, miR-6134, miR-129-2-3p, miR-3074-5p, miR-214, miR-154b-3p, miR-2312, miR-1827, miR-625-5p, miR-885-3p, miR-450a-1-3p, miR-299, miR-21a-3p, miR-30d-5p, miR-323-5p, miR-139-5p, miR-192-5p, miR-155-5p, novel\_32, miR-204-3p, miR-1277-3p, miR-30c-1-3p, miR-140-5p, miR-221-5p, miR-532-5p, miR-154a-3p, miR-3065-3p, miR-760-3p, miR-466i-5p, miR-106a, miR-299-3p, miR-221-5p, miR-542-5p, novel\_17, miR-196a-3p, miR-185-3p, miR-130a-5p, miR-181b-1-3p, miR-377-5p, miR-143-3p, miR-2432, miR-486-3p, miR-487a, miR-216c-5p, miR-2887, miR-345-3p, miR-20a, novel\_73, miR-493-3p, miR-215-5p, miR-362-3p, miR-193b-5p, miR-2300b-3p, miR-1197-5p, miR-188-3p, miR-1434-5p, miR-5703, miR-2904, miR-23c, miR-23b-3p, miR-106a, miR-212-5p, miR-335, miR-154-3p, miR-2284q, miR-2285t, miR-2285n, miR-2285y, miR-877-3p, miR-361-3p, miR-9-3p, miR-541-3p, miR-2447, miR-2285f, miR-877-3p, miR-9-3p, miR-376a-3p, miR-335-3p, miR-140-5p, miR-1306-3p, miR-378j, miR-378g, miR-27a-3p, miR-376d, miR-139-5p, miR-24-1-5p, miR-211-5p, miR-3955-3p, miR-1185-5p, miR-542-5p, miR-214-3p, miR-1468, novel\_115, miR-326, miR-431-5p, miR-342, miR-106b-5p, novel\_19, miR-362-3p, miR-30c-1-3p, miR-758-3p, miR-4532, miR-106a-5p, miR-382-3p, miR-652-5p, miR-33a-5p, miR-23a-3p, miR-362-3p, miR-3120-5p, miR-541, miR-143-5p, miR-329-3p, miR-2284r, miR-3962, miR-758-3p, miR-1a-3p, miR-1298-3p, miR-376b-3p, miR-2285e, miR-9788-3p, miR-455-3p, miR-330-3p, novel\_4, miR-27a-3p, miR-181b-2-3p, miR-138-5p, miR-486b-3p, miR-134-5p, miR-204-5p, miR-1306-3p, miR-3969, miR-6740-5p, miR-1260b, miR-93, miR-145-3p, novel\_42, miR-6128, miR-329a, miR-1248, miR-20b-5p, miR-17-5p, miR-23b, miR-93-5p, miR-301b-5p, miR-3591-5p, miR-23b-5p, miR-450c-3p, miR-22-3p, miR-2411-5p, miR-383-5p, miR-411b-5p, miR-582-3p, miR-450a-1-3p, miR-2285p, miR-2331-5p, miR-412-5p, novel\_124, miR-200a-3p, miR-214-3p, miR-2330-5p, miR-382-3p, miR-28b, miR-2411, miR-200a, miR-503-3p, miR-450a-1-3p, miR-378b, miR-150-5p, miR-671-5p, miR-2319a, miR-369-5p, miR-211-5p, miR-3120-3p, miR-141-3p, miR-216b-3p, miR-370-5p, miR-489, miR-154b-5p, miR-22-3p, miR-28c, miR-370-5p, miR-412-5p, miR-301a-5p, miR-6740-5p, miR-132-5p, miR-450b-3p, miR-204-5p, miR-874-5p, miR-1193, miR-214, miR-211, miR-361-3p, miR-423-5p, miR-3184-5p



miR-228bw, miR-143-3p, miR-486-3p, miR-181b-1-3p, miR-142a-3p, miR-376a-5p, miR-422a, miR-92a-1-5p, miR-345-3p, miR-618, miR-2484, miR-212-5p, miR-380-5p, miR-106a, miR-2284h-5p, miR-7859, miR-378a-3p, miR-378i, miR-664-5p, miR-16-1-3p, miR-142-3p, miR-122-5p, miR-665, miR-151-3p, miR-500, miR-4492, novel\_74, miR-296-3p, miR-504-5p, miR-15b-5p, miR-500a-3p, miR-129b-3p, miR-543-3p, miR-625-5p, miR-345-5p, miR-101b-3p, miR-1b-5p, miR-8485, miR-378d, miR-106b-5p, miR-16b, miR-182-5p, miR-199a-3p, miR-491-5p, miR-1185-5p, miR-181b-2-3p, miR-1343-3p, miR-199b-3p, miR-1298-3p, miR-147a, miR-1a-3p, miR-1839-5p, miR-101c, miR-1388-5p, miR-2284j, let-7i-3p, miR-3956-3p, miR-2447, novel\_111, miR-361-3p, miR-628-3p, miR-499a-5p, miR-3968, miR-7689-3p, miR-378g, miR-409-5p, miR-9-3p, miR-544-5p, miR-493-5p, miR-136-5p, miR-504, miR-668-5p, miR-200a-3p, novel\_96, miR-486-5p, miR-2284z, miR-134-5p, miR-322-5p, miR-330-5p, miR-23b-5p, miR-16-5p, miR-2284v, miR-6740-5p, miR-2284k, miR-592, miR-134-5p, miR-2285aa, miR-574-5p, miR-93-5p, miR-20b-5p, miR-345-5p, miR-329b, miR-668-3p, miR-493-5p, let-7a-2-3p, miR-432-3p, miR-2284l, miR-432-3p, miR-2285r, miR-2411-3p, miR-296-3p, miR-103a-3p, miR-411-5p, miR-134-3p, miR-1843b-5p, miR-2113, miR-432, miR-708-3p, miR-497-5p, miR-16-1-3p, miR-16b, miR-758-5p, miR-2284w, miR-142b, miR-576-3p, miR-379-3p, miR-206, miR-6119-3p, miR-3120-3p, novel\_68, miR-181b-3p, miR-677, miR-320c, miR-411b-3p, miR-3591-3p, miR-3065-5p, miR-3970, miR-378f, miR-20a, miR-2411, miR-185-3p, miR-21-3p, miR-466i-5p, miR-320d, miR-106a, miR-199a-3p, miR-616-3p, miR-222-5p, miR-340-5p, miR-15a-5p, miR-383-5p, miR-5703, miR-376a-5p, miR-4429, miR-2330-3p, miR-378c, miR-206-3p, miR-338-5p, miR-320e, miR-708-5p, miR-424-5p, miR-664a, miR-21-3p, miR-370-5p, miR-378a-3p, miR-877-5p, miR-204-3p, miR-656-3p, miR-

miR-1434-5p, miR-378a-3p, miR-378i, miR-362-3p, let-7a-3p, miR-148a-5p, miR-142-3p, miR-3600, miR-30d-3p, miR-548e-3p, miR-18a-3p, novel\_83, miR-7859, miR-422a, miR-374a-5p, novel\_17, miR-760-3p, miR-216c-5p, miR-421-5p, miR-130a-5p, miR-129b-3p, miR-543-3p, miR-186-5p, miR-1827, miR-21-3p, miR-378a-3p, miR-548o-3p, miR-22-3p, miR-877-5p, miR-6516, miR-499b-3p, miR-377-3p, miR-30a-3p, let-7b-3p, miR-30e-3p, miR-130b-5p, miR-3074-2-3p, miR-378c, miR-3074-5p, miR-129-2-3p, miR-181c-5p, miR-142a-5p, miR-224-5p, miR-378b, miR-329-3p, miR-1839-5p, miR-21b, miR-378c, miR-362-3p, miR-2426, miR-27a-3p, miR-105-1, novel\_4, miR-330-3p, novel\_78, miR-148b-5p, miR-539-5p, miR-142-5p, miR-2957, miR-362-3p, miR-1185-5p, miR-3955-3p, miR-494-3p, miR-382-3p, miR-1b-5p, miR-378d, miR-381-3p, miR-7689-3p, miR-211-5p, miR-126b-5p, miR-27a-3p, miR-499a-3p, miR-378e, miR-25, miR-3082-5p, miR-181d-5p, miR-452-5p, miR-218-2-3p, miR-3591-5p, miR-1290, miR-105-2, miR-1224-5p, miR-129-1-3p, miR-6516-5p, miR-378h, miR-3071-3p, novel\_127, miR-181b-5p, miR-30a-3p, miR-3529-3p, miR-200a-5p, miR-671-5p, miR-329a, miR-2318, miR-2285aa, miR-3068-3p, miR-365a-3p, novel\_63, miR-204-5p, miR-592, miR-6128, miR-1306-5p, miR-378c, miR-22-3p, miR-197-3p, novel\_23, miR-653, miR-181a-5p, miR-223-3p, miR-27b-3p, miR-105-5p, miR-330-3p, miR-224-5p, miR-377-3p, miR-466f-3p, miR-378a-5p, miR-668-3p, miR-130b-5p, miR-6240, miR-2285r, miR-18a-3p, miR-3065-5p, miR-3591-3p, miR-378f, novel\_68, miR-378b, miR-3074-5p, miR-2404, miR-133a-5p, miR-421-5p, novel\_27, miR-2284w, miR-211, miR-323c

miR-4286, miR-30a-3p, miR-29b-2-5p, miR-3529-3p, miR-1271-3p, miR-3065-3p, miR-199a-5p, miR-28b, miR-339a, miR-3071-3p, miR-30c-2-3p, miR-6119-5p, miR-205-5p, miR-200a-3p, miR-152-3p, miR-2898, miR-450a-2-3p, miR-18b-5p, miR-1224-5p, novel\_79, miR-6517, miR-214-5p, miR-129-1-3p, miR-486-5p, miR-322-5p, miR-30a-5p, miR-330-5p, miR-1343-5p, miR-29d-3p, miR-3578, miR-1290, miR-10a-5p, let-7a-2-3p, miR-103b, miR-16-5p, miR-1306-5p, miR-1197-3p, miR-93, miR-125b-5p, miR-331-3p, miR-370-5p, miR-29b-3p, miR-551b-3p, miR-410-3p, miR-1271, miR-615-5p, miR-141-3p, miR-125a, miR-2355-5p, miR-370-3p, miR-2285aa, miR-874-3p, miR-574-5p, miR-199a-5p, miR-3154, miR-18a, miR-17-5p, miR-93-5p, miR-30e-5p, miR-488-3p, miR-1248, miR-671-5p, miR-20b-5p, miR-7144-5p, miR-329a, let-7g-3p, miR-668-3p, let-7a-2-3p, miR-654-3p, novel\_51, miR-106a-5p, miR-17-5p, miR-197-5p, miR-125a-5p, miR-1343-5p, miR-124-5p, miR-339-5p, miR-133b-5p, miR-544b, miR-20b, miR-194-3p, novel\_116, miR-3431, miR-22-3p, miR-1285, miR-708-3p, miR-873a-5p, miR-27b-3p, miR-497-5p, miR-29b, miR-16b, miR-1193, novel\_101, miR-29c-3p, miR-2285x, miR-3957-3p, miR-342-3p, miR-2428, miR-199b-5p, miR-2284w, miR-326-3p, miR-24-3p, miR-371b-3p, miR-33a-3p, miR-16a, miR-20a-5p, miR-28c, miR-15a, miR-502b, miR-29a, miR-6119-3p, miR-10a-5p, miR-320b, miR-3074-5p, miR-378b, novel\_68, novel\_69, miR-411b-3p, miR-29a-3p, miR-670-3p, miR-146b-3p, miR-3065-5p, miR-1306, miR-150-5p, miR-148a-3p, miR-18b, miR-2387, miR-6395, miR-195a-5p, miR-345-3p, miR-20a, miR-216c-5p, miR-143-3p, miR-125b-2-3p, miR-29b-1-5p, miR-125b, miR-185-3p, miR-219b-5p, miR-324-3p, novel\_17, miR-210-5p, miR-21-3p, miR-30d, miR-221-5p, miR-3653-3p, miR-466i-5p, miR-760-3p, miR-106a, miR-30d-3p, miR-106a, miR-548e-3p, miR-328-3p, miR-1247-5p, novel\_83, miR-15a-5p, miR-148b-3p, miR-7850, miR-382, miR-30b-3p, miR-204-5p, novel\_74, miR-664a, miR-331-3p, miR-205-5p, miR-664-3p, miR-326, miR-28c, miR-326-3p, miR-145-3p, miR-2428, miR-28b, miR-211, novel\_73, miR-2426, miR-433-3p, miR-330-5p, miR-125b-2-3p, miR-378j, miR-671-3p, miR-211-5p, miR-664b

miR-3184-3p, miR-2284w, miR-2433, miR-122-3p, miR-185-3p, miR-2331-5p, miR-2898, miR-4726-5p, miR-4492, miR-615-5p, miR-7977, miR-2355-5p, miR-1b-3p, miR-134-3p, miR-582-5p, miR-378g, miR-328-3p, miR-4443, miR-671-3p, miR-22-3p, miR-2113, miR-361-3p, miR-30b-3p, miR-22-3p, miR-147-3p, miR-30b-3p, miR-582-5p, miR-6395, miR-4508

TRH ENSOARGO(thyrotro:5p, miR-1343-5p, miR-124-5p, miR-339-5p, miR-133b-5p, miR-544b, miR-20b, miR-194-3p, novel\_116, miR-3431, miR-22-3p, miR-1285, miR-708-3p, miR-873a-5p, miR-27b-3p, miR-497-5p, miR-29b, miR-16b, miR-1193, novel\_101, miR-29c-3p, miR-2285x, miR-3957-3p, miR-342-3p, miR-2428, miR-199b-5p, miR-2284w, miR-326-3p, miR-24-3p, miR-371b-3p, miR-33a-3p, miR-16a, miR-20a-5p, miR-28c, miR-15a, miR-502b, miR-29a, miR-6119-3p, miR-10a-5p, miR-320b, miR-3074-5p, miR-378b, novel\_68, novel\_69, miR-411b-3p, miR-29a-3p, miR-670-3p, miR-146b-3p, miR-3065-5p, miR-1306, miR-150-5p, miR-148a-3p, miR-18b, miR-2387, miR-6395, miR-195a-5p, miR-345-3p, miR-20a, miR-216c-5p, miR-143-3p, miR-125b-2-3p, miR-29b-1-5p, miR-125b, miR-185-3p, miR-219b-5p, miR-324-3p, novel\_17, miR-210-5p, miR-21-3p, miR-30d, miR-221-5p, miR-3653-3p, miR-466i-5p, miR-760-3p, miR-106a, miR-30d-3p, miR-106a, miR-548e-3p, miR-328-3p, miR-1247-5p, novel\_83, miR-15a-5p, miR-148b-3p, miR-7850, miR-382, miR-30b-3p, miR-204-5p, novel\_74, miR-664a, miR-331-3p, miR-205-5p, miR-664-3p, miR-326, miR-28c, miR-326-3p, miR-145-3p, miR-2428, miR-28b, miR-211, novel\_73, miR-2426, miR-433-3p, miR-330-5p, miR-125b-2-3p, miR-378j, miR-671-3p, miR-211-5p, miR-664b

HSD11B1 ENSOARGO(hydroxys 3p, miR-2428, miR-28b, miR-211, novel\_73, miR-2426, miR-433-3p, miR-330-5p, miR-125b-2-3p, miR-378j, miR-671-3p, miR-211-5p, miR-664b

KIRREL3 ENSOARGO(kin of I. 3p, miR-2428, miR-28b, miR-211, novel\_73, miR-2426, miR-433-3p, miR-330-5p, miR-125b-2-3p, miR-378j, miR-671-3p, miR-211-5p, miR-664b

miR-106a, miR-299-3p, miR-21-3p, miR-20a, miR-130a-5p, miR-146a-5p, miR-1246, miR-2300b-3p, miR-376a-5p, miR-188-3p, miR-5703, miR-19b-3p, let-7a-3p, miR-3600, miR-340-5p, miR-148b-3p, miR-200b, miR-324-3p, miR-655-3p, miR-29b-2-5p, miR-6516-3p, miR-155-5p, miR-17-3p, miR-487a-5p, miR-539-5p, miR-145a-3p, miR-2330-3p, miR-3074-2-3p, miR-206-3p, miR-21a-3p, let-7f-1-3p, let-7g-3p, novel\_99, miR-140-5p, miR-21-3p, miR-532-5p, miR-182-5p, miR-6516, miR-656-3p, miR-22-3p, novel\_32, miR-204-3p, miR-155-5p, miR-326, miR-106a-5p, miR-652-5p, miR-376b, miR-3187-3p, miR-412-3p, miR-450b-5p, miR-299a-5p, miR-101a-5p, miR-409b, miR-216a-3p, miR-500-5p, miR-2285e, miR-1973, miR-4726-5p, miR-452-5p, miR-194b-5p, miR-181d-5p, miR-362-5p, miR-361-3p, miR-199b-5p, miR-20a-3p, miR-489, miR-200c, miR-17-3p, miR-181b-5p, miR-200c-3p, miR-92a-3p, miR-1, miR-30a-3p, miR-29b-2-5p, miR-2478, miR-199a-5p, miR-1957a, miR-1271-3p, miR-345-3p, miR-582-3p, miR-200b-3p, miR-222, miR-6516-5p, miR-483-3p, miR-135a-1-3p, miR-3969, miR-409-3p, miR-135a-5p, miR-138-5p, miR-410-3p, miR-204-5p, miR-486b-3p, miR-93, miR-500b-5p, miR-17-5p, miR-3154, miR-362-5p, miR-376c-5p, miR-23a-5p, miR-190a-3p, miR-1814c, miR-370-3p, miR-374c-3p, miR-365a-3p, miR-199a-5p, miR-190a, miR-330-3p, miR-17-5p, miR-106a-5p, miR-130b-5p, miR-101-5p, miR-296-3p, miR-1285, miR-1434-3p, miR-194-5p, miR-138, miR-122-3p, miR-130a-3p, miR-432-5p, miR-2285g, miR-2284d, miR-20b, miR-20a-5p, miR-92a-3p, novel\_1, miR-22-5p, miR-17-3p, miR-2285x, miR-211, miR-371b-3p, miR-326-3p, miR-2428, miR-18a-3p, miR-450b-3p, miR-19a-3p, miR-135b-5p, miR-655-5p, miR-7-1-3p, miR-618, miR-26a-5p, novel\_17, miR-210-5p, miR-324-3p, miR-500a-5p, miR-345-3p, miR-329a-5p, miR-369-3p, miR-181b-1-3p, miR-486-3p, miR-2366, miR-33b-3p, novel\_73, miR-16-1-3p, miR-18a-3p, miR-106a, miR-30d-3p, miR-30a-3p, miR-

miR-539-5p, miR-425-5p, miR-10b-5p, miR-206-3p, miR-6134, miR-320e, miR-450b-3p, miR-6516-3p, miR-3065-3p, miR-532-5p, miR-6516, miR-656-3p, miR-139-5p, novel\_25, miR-204-3p, miR-877-5p, miR-133b-3p, miR-2312, let-7g-3p, miR-18a-5p, novel\_99, miR-20a, miR-29b-1-5p, miR-125b, miR-320d, miR-106a, miR-2284m, miR-548e-3p, miR-485-3p, miR-487a-3p, miR-383-5p, miR-148b-3p, miR-200b, miR-199a-3p, novel\_83, novel\_133, miR-1246, miR-124-3p, miR-1197-5p, miR-1193, miR-140-3p, miR-5703, miR-19b-3p, miR-4429, novel\_60, miR-3059-5p, miR-212-3p, miR-2285f, miR-194b-5p, miR-8095, miR-219a-2-3p, miR-154a, miR-371a-5p, miR-769-5p, miR-335, miR-3064-5p, miR-499b-5p, miR-541-5p, miR-3082-5p, miR-361-3p, novel\_94, miR-106a-5p, let-7c-3p, miR-30c-1-3p, miR-758-3p, miR-342, miR-320b, novel\_103, miR-3085-3p, novel\_4, miR-105-1, miR-9788-3p, miR-216a-3p, miR-484, miR-6529a, miR-10b, miR-2426, miR-1306-5p, miR-6128, miR-133a-3p, miR-323-3p, miR-93, miR-34c-3p, miR-29b-3p, miR-331-3p, miR-144, miR-135a-5p, miR-3969, miR-769, miR-488-3p, miR-17-5p, miR-18a, miR-320a, miR-10b-3p, miR-671-5p, miR-30a-3p, miR-1, miR-3065-3p, miR-490-3p, miR-200c, miR-30c-2-3p, miR-181c-3p, miR-450a-2-3p, miR-200c-3p, miR-423-3p, miR-6516-5p, miR-545-5p, miR-345-3p, miR-134, miR-29d-3p, miR-200b-3p, miR-10a-5p, miR-135a-2-3p, miR-342-3p, novel\_101, miR-20a-5p, miR-656-5p, miR-147-5p, miR-10a-5p, miR-2404, miR-670-3p, miR-29a-3p, miR-2285ab, miR-18b, miR-18a-3p, miR-1291, miR-19a-3p, miR-2285k, miR-6516-3p, miR-6395, miR-135b-5p, miR-130b-5p, miR-363-5p, miR-539-3p, miR-345-5p, miR-224-5p, miR-106a-5p, miR-17-5p, miR-452-5p, miR-125a-5p, miR-665, miR-185-5p, miR-2355-3p, miR-20b, miR-1434-3p, miR-145a-5p, miR-3071-5p, miR-194-5p, miR-29b, miR-769-5p, miR-6525, miR-224-5p, miR-30a-3p, miR-30a-3p, miR-219b-5p, miR-124-5p, miR-191-3p, miR-660, miR-146b, miR-130b-5p, miR-146a, miR-135a-1-3p, miR-338-5p, miR-146a-5p, miR-380-3p, miR-130b-5p, miR-124a, miR-181a-2-3p, miR-4286, miR-380-3p, miR-146b-5p, miR-1434-3p, miR-124-3p, miR-660-5p

TJP2 ENSOARGO(tight junction)

IQGAP1 ENSOARGO(IQ motif)

miR-125b, miR-422a, miR-185-3p, miR-221-5p, miR-30b-3p, miR-3653-3p, miR-195a-3p, miR-486-3p, miR-2300b-3p, novel\_133, miR-378i, miR-217-5p, miR-378a-3p, miR-1193, miR-5703, miR-140-3p, miR-2904, miR-124-3p, miR-19b-3p, miR-3960, miR-30d-3p, miR-15a-5p, miR-532-3p, miR-2285j, miR-664a-5p, miR-19b-1-5p, miR-155-5p, miR-664a, miR-4492, miR-708-5p, miR-424-5p, miR-4510, miR-378c, miR-769-5p, miR-3184-5p, miR-122-5p, miR-2285c, miR-433-3p, miR-2312, miR-496-3p, miR-378a-3p, miR-221-5p, miR-2331-3p, miR-504-5p, miR-182-5p, miR-6130, miR-193b-3p, miR-155-5p, miR-15b-5p, miR-204-3p, miR-5126, miR-182-5p, miR-25-5p, miR-199b-5p, miR-424-5p, miR-2330-5p, miR-124a, miR-376b, miR-378d, miR-758-3p, miR-378b, miR-30b-3p, miR-758-3p, miR-412-3p, miR-7857, miR-378c, miR-16-2-3p, miR-1343-3p, miR-27a-3p, miR-145b, miR-2285e, miR-421, miR-9788-3p, miR-216a-3p, miR-615, novel\_82, miR-382-3p, miR-769-5p, miR-2284q, miR-2447, miR-2285f, miR-423-5p, miR-199b-5p, miR-504, miR-664b, miR-7977, miR-499b-5p, miR-378e, miR-27a-3p, miR-664-3p, miR-2285af, miR-217, miR-127-5p, miR-450a-2-3p, miR-200a-3p, miR-181a-2-3p, miR-28b, miR-199a-5p, miR-134, miR-615-3p, miR-23b-5p, miR-1343-5p, miR-496, miR-155-5p, miR-412, miR-1224-5p, miR-378h, miR-483-3p, miR-322-5p, novel\_121, miR-134-5p, miR-125b-5p, miR-486b-3p, miR-134-5p, miR-28-5p, miR-193a-5p, miR-16-5p, miR-378c, miR-503-3p, miR-488-3p, miR-3154, miR-485-5p, miR-23a-5p, miR-503-3p, miR-574-5p, miR-141-3p, miR-125a, miR-769, miR-374c-3p, miR-199a-5p, miR-7-5p, miR-2285v, miR-483-3p, miR-193a-3p, miR-125a-5p, miR-1343-5p, miR-1285, miR-7b-5p, miR-19b-2-5p, miR-145a-5p, miR-30b-3p, miR-16b, miR-27b-3p, miR-497-5p, miR-2285g, miR-28c, miR-15a, miR-4324, miR-16a, miR-128-1-5p, miR-22-5p, miR-136-3p, miR-193b-3p, miR-1307-3p, miR-199h-5p, miR-2387, miR-2285ab, miR-19a-

miR-34b-3p, let-7a-2-3p, miR-582-3p, miR-7641, miR-2285af, miR-181b-5p, miR-450a-2-3p, miR-17-3p, miR-181a-2-3p, miR-2403, miR-2385-3p, miR-2284a, miR-380-5p, miR-320a, miR-17-5p, miR-3154, miR-2448-3p, miR-1814c, miR-485-5p, let-7g-3p, miR-769, miR-374c-3p, miR-144, miR-331-3p, miR-370-5p, miR-410-5p, miR-34c-3p, miR-1-5p, miR-31-3p, miR-410-3p, miR-3607-3p, miR-6128, miR-1306-5p, miR-145-3p, miR-365a-5p, miR-93, miR-323-3p, miR-194-5p, miR-3071-5p, miR-145a-5p, miR-374b-3p, miR-181a-5p, miR-30b-3p, miR-133b-5p, miR-2284d, miR-2285g, miR-17-5p, miR-330-3p, miR-224-5p, miR-1343-5p, miR-130b-5p, miR-345-5p, miR-539-3p, miR-18a-3p, miR-2285ab, miR-6516-3p, miR-195a-5p, miR-320b, miR-323a-5p, miR-33a-3p, miR-16a, miR-20a-5p, miR-15a, miR-199c, miR-147-5p, novel\_1, miR-2285x, miR-17-3p, miR-1193, miR-3957-3p, novel\_27, miR-326-3p, miR-371b-3p, miR-24-3p, miR-5703, miR-2904, miR-4429, miR-485-3p, miR-548e-3p, miR-616-3p, miR-340-5p, miR-148b-3p, miR-15a-5p, miR-222-5p, miR-487a-3p, miR-216a-5p, miR-196a-3p, miR-21-3p, miR-1277-5p, miR-221-5p, miR-106a, miR-320d, miR-20a, miR-183-5p, miR-216c-5p, miR-21a-3p, novel\_99, let-7g-3p, miR-370-5p, miR-21-3p, miR-32-3p, miR-140-5p, miR-221-5p, miR-545-3p, miR-155-5p, miR-877-5p, novel\_25, miR-139-5p, miR-323-5p, miR-320e, miR-324-3p, miR-424-5p, miR-208b-5p, miR-17-3p, miR-664a, miR-155-5p, miR-450b-3p, miR-2330-3p, miR-30b-3p, miR-484, miR-6529a, miR-450b-5p, miR-222-5p, miR-27a-3p, miR-409b, miR-2285e, novel\_103, miR-326, miR-320b, miR-25-5p, miR-3085-3p, miR-33a-5p, miR-1839-3p, miR-424-5p, miR-106a-5p, miR-758-3p, miR-129b-5p, miR-361-3p, miR-7977, miR-541-5p, miR-10b, miR-664b, miR-3064-5p, miR-27a-3p, miR-3082-5p, miR-769-5p, miR-2284q, miR-2285t, miR-181d-5p, miR-194b-5p, miR-2285f, miR-541-3p, miR-32-3p, miR-305a-5p, miR-330-5p, miR-466i-5p, miR-128-1-5p, miR-2408, miR-324-3p, miR-222-5p, miR-346, miR-122-5p, miR-324-5p, miR-669, miR-423-5p, miR-3184-5p, miR-574-5p, novel\_42, miR-363-5p, miR-148b-5p, miR-30a-3p, miR-3064-5p, miR-2887, miR-466i-5p, miR-1277-5p, miR-3653-3p, novel\_96, miR-2285af, miR-376b-3p, miR-125a-3p, miR-505-5p, miR-758-5p, miR-545-5p, miR-3600, novel\_73, miR-133a-3p, miR-218-1-3p, miR-3578, miR-1197-5p, miR-1434-5p, miR-6525, miR-3184-5p, miR-10b-3p, miR-6134, miR-539-5p, miR-592, miR-2285j, miR-2332, miR-30e-3p, miR-30a-3p, miR-26c, miR-338-5p, miR-3969, miR-1277-3p, miR-3068-3p, miR-660-5p, miR-671-5p, miR-424-3p, miR-3154, miR-628-5p, miR-3085-3p, miR-124-5p, miR-491-5p, miR-660, miR-376b-3p, novel\_116, miR-548w, miR-27a-3p, miR-1388-5p, miR-30b-3p, miR-27b-3p, miR-6529a, miR-873a-5p, miR-2113, miR-30b-3p, miR-24-3p, miR-423-5p, miR-2285f, novel\_1, miR-2284q, miR-6123, miR-502b, miR-669, miR-27a-3p, miR-376d, miR-3064-5p, miR-329-5p, miR-376a-3p, miR-2285ab, miR-376b-3p

miR-380-5p, miR-2478, novel\_39, miR-199a-5p, miR-1957a, miR-376b-5p, miR-376c-5p, miR-192-3p, miR-29b-2-5p, miR-3064-5p, miR-200c-3p, novel\_96, miR-200c, miR-6119-5p, miR-134-5p, miR-214-5p, miR-429-3p, miR-582-3p, miR-300, miR-128-3p, miR-345-3p, miR-134, miR-330-5p, miR-1197-3p, miR-145-3p, miR-138-5p, miR-134-5p, miR-486b-3p, miR-204-5p, miR-5100, miR-34c-5p, miR-199a-5p, miR-574-5p, miR-370-3p, miR-1271, miR-345-5p, miR-1814c, miR-381-3p, miR-2448-3p, miR-3154, miR-432-3p, miR-432-3p, miR-345-5p, miR-380-5p, miR-130b-5p, miR-6240, miR-7-5p, miR-330-3p, miR-2411-3p, novel\_51, miR-2285g, miR-3431, miR-30b-3p, miR-138, miR-16-1-3p, miR-188-5p, miR-7b-5p, miR-223-3p, miR-1434-3p, novel\_23, miR-211, miR-24-3p, miR-326-3p, miR-449a, miR-199b-5p, miR-6119-3p, miR-421-5p, miR-34c, novel\_69, miR-411b-3p, miR-34b, miR-677, miR-181b-3p, miR-3074-5p, miR-7-1-3p, miR-450b-3p, miR-412-3p, miR-9851-3p, miR-2285ab, miR-1306, miR-216a-3p, miR-29b-1-5p, miR-421-5p, miR-181b-1-3p, miR-125b-2-3p, miR-486-3p, miR-143-3p, miR-345-3p, miR-3653-3p, miR-34b-5p, miR-221-5p, miR-324-3p, miR-500a-5p, miR-345-3p, miR-185-3p, miR-222-5p, miR-151-5p, novel\_73, miR-16-1-3p, miR-34a-5p, miR-2366, miR-2300b-3p, miR-2904, miR-1197-5p, miR-5703, miR-140-3p, miR-3184-5p, miR-122-5p, miR-338-3p, miR-3074-5p, miR-4510, miR-3074-2-3p, miR-130b-5p, miR-151-3p, miR-29b-2-5p, miR-320e, miR-2284s, miR-6130, novel\_25, novel\_32, miR-204-3p, miR-151b, miR-221-5p, miR-2312, miR-345-5p, miR-1827, miR-2285c, miR-8485, miR-2310, miR-3085-3p, miR-491-5p, miR-199b-5p, miR-326, miR-1306-5p, miR-29b-1-5p, miR-2320-3p, miR-147a, miR-216a-3p, miR-9788-3p, miR-455-3p, miR-2285e, novel\_4, miR-330-3p, miR-151a-3p, miR-181b-2-3p, miR-2426, miR-484, miR-541, miR-30b-3p, miR-422-5p, miR-2447, miR-3050-5p, miR-541-3p, miR-2285f, miR-



miR-493-5p, let-7a-2-3p, miR-22841, novel\_51, miR-296-3p, miR-7-5p, miR-31-5p, miR-412-5p, miR-22-3p, miR-1843b-5p, miR-7b-5p, miR-542-3p, miR-188-5p, miR-497-5p, miR-16-1-3p, miR-16b, miR-335-5p, miR-301b-3p, miR-374c-5p, miR-1247-3p, miR-4324, miR-6123, miR-3120-3p, miR-329-5p, miR-181b-3p, miR-669, miR-320c, miR-677, miR-3065-5p, miR-1306, miR-150-5p, miR-2319a, miR-412-3p, miR-192-3p, miR-29a-5p, miR-3071-3p, miR-219-3p, miR-127-5p, miR-429-3p, miR-2285ad, novel\_121, miR-486-5p, miR-758-5p, miR-322-5p, miR-23b-5p, miR-2427, miR-16-5p, miR-1197-3p, miR-6740-5p, miR-125b-5p, novel\_63, novel\_9, miR-1271, miR-125a, miR-2355-5p, miR-2285aa, miR-503-3p, miR-3068-3p, miR-376c-3p, miR-300-3p, miR-23b, miR-137-3p, miR-329a, miR-329b, miR-345-5p, miR-23a-3p, miR-101b-3p, miR-16b, miR-182-5p, miR-130b-3p, miR-1185-5p, miR-181b-2-3p, miR-199b-3p, miR-148b-5p, miR-539-5p, miR-376b-3p, miR-147a, miR-329-3p, miR-101c, miR-362-3p, miR-190b-5p, miR-3956-3p, miR-2447, miR-1285-5p, novel\_111, miR-101-3p, miR-218-5p, miR-154-3p, miR-3968, miR-2319b, miR-2483-3p, miR-499a-3p, miR-25, miR-378j, miR-140-5p, miR-1983, miR-493-5p, miR-96-5p, miR-487a, miR-329a-5p, miR-181b-1-3p, miR-376c-3p, miR-664b-3p, miR-92a-1-5p, novel\_17, miR-2285p, miR-202-5p, miR-30d-3p, miR-23c, miR-7859, miR-23b-3p, miR-217-5p, miR-2366, miR-193b-5p, miR-148a-5p, miR-16-1-3p, miR-3184-3p, miR-122-5p, miR-224-5p, miR-769-5p, miR-3604, miR-30a-3p, miR-219b-3p, miR-30e-3p, miR-15b-3p, miR-454-3p, miR-500, miR-129-5p, miR-190a-5p, novel\_74, miR-552-3p, miR-154a-3p, miR-30c-1-3p, miR-2331-3p, miR-15b-5p, miR-376e-3p, miR-499b-3p, miR-301a-3p, miR-500a-3p, miR-186-5p, miR-543-3p, miR-345-5p, miR-363-5p, miR-345-5p, miR-296-3p, miR-197-5p, miR-190a, miR-224-5p, miR-660, miR-125a-5p, miR-130a-3p, miR-665, miR-6238, miR-3071-5p, miR-181a-5p, miR-1434-

novel\_94, miR-877-3p, let-7d-5p, miR-376d, miR-7977, miR-664b, miR-20a-3p, miR-10b, miR-2285t, miR-374a-3p, miR-3958-3p, miR-335, miR-769-5p, miR-371a-5p, miR-382-3p, miR-219a-2-3p, miR-2285f, miR-452-5p, miR-181d-5p, miR-3059-5p, miR-450b-5p, miR-125b-2-3p, miR-30b-3p, miR-484, miR-4791, miR-9788-3p, miR-216a-3p, miR-2285e, miR-2320-3p, miR-5010-3p, novel\_4, miR-409b, let-7e, miR-3955-3p, miR-2957, miR-342, miR-1306-5p, novel\_115, miR-326, miR-4532, miR-758-3p, miR-30c-1-3p, let-7c-3p, miR-33a-5p, let-7a-5p, miR-494-3p, miR-1839-3p, miR-133b-3p, miR-2312, let-7g-3p, novel\_25, miR-6516, miR-139-5p, miR-221-5p, miR-450b-3p, miR-664a, miR-6516-3p, miR-17-3p, miR-19b-1-5p, miR-338-5p, let-7b-5p, miR-206-3p, miR-145a-3p, miR-19b-3p, miR-2904, miR-140-3p, miR-188-3p, miR-5703, miR-2300b-3p, miR-532-3p, miR-199a-3p, miR-222-5p, miR-148b-3p, miR-200b, miR-IL18R1 ENSOARGO0 interleu.3600, miR-221-5p, miR-1277-5p, miR-299-3p, miR-466i-5p, miR-125b, miR-125b-2-3p, miR-183-5p, miR-216c-5p, miR-6516-3p, miR-19a-3p, miR-21c, miR-376b-3p, miR-18a-3p, miR-2285ab, miR-2387, miR-656-5p, miR-199c, novel\_1, miR-382-5p, let-7i, miR-33a-3p, miR-502-5p, miR-326-3p, miR-323c, miR-24-3p, novel\_101, miR-17-3p, miR-342-3p, miR-2889, miR-30b-3p, miR-21-5p, miR-1260b, miR-145a-5p, miR-181a-5p, miR-1434-3p, miR-2285g, miR-432-5p, miR-185-5p, let-7g-5p, miR-377-5p, miR-187-3p, miR-452-5p, miR-125a-5p, miR-190a, miR-99a-5p, miR-224-5p, miR-345-5p, miR-654-3p, miR-130b-5p, miR-376c-5p, miR-671-5p, miR-10b-3p, miR-3154, miR-100-5p, miR-374c-3p, miR-3965, miR-365a-3p, miR-769, miR-370-3p, miR-615-5p, miR-374b-3p, miR-767-5p, miR-144, miR-331-3p, miR-409-3p, miR-145-3p, miR-374a-3p, miR-133a-3p, miR-200b-3p, miR-128-3p, miR-99a-5p, let-7a-2-3p, let-7d, miR-134, miR-6516-5p, miR-450a-2-3p, miR-17-3p, miR-200c-3p, miR-181b-5p, miR-

|      |                    |                                                                                                                                                                                                                                                                                                                                                                                                                                                                                                                                                                                                                                                                                                                                                                                                                                                                                                                                                                                                                                                                                                                                                                                                                                                                                                                                                                                                                                                          |
|------|--------------------|----------------------------------------------------------------------------------------------------------------------------------------------------------------------------------------------------------------------------------------------------------------------------------------------------------------------------------------------------------------------------------------------------------------------------------------------------------------------------------------------------------------------------------------------------------------------------------------------------------------------------------------------------------------------------------------------------------------------------------------------------------------------------------------------------------------------------------------------------------------------------------------------------------------------------------------------------------------------------------------------------------------------------------------------------------------------------------------------------------------------------------------------------------------------------------------------------------------------------------------------------------------------------------------------------------------------------------------------------------------------------------------------------------------------------------------------------------|
| ETS1 | ENSOARGO(v-ets av  | <p>miR-429-3p, miR-299a-3p, miR-2285ad, miR-376a-5p, miR-200b, miR-95-3p, miR-532-3p, miR-450a-1-3p, miR-3578, miR-1246, miR-615-3p, miR-5703, miR-1197-5p, miR-361-5p, miR-200b-3p, miR-133a-3p, miR-155-5p, miR-345-3p, miR-181a-2-3p, miR-4286, miR-130a-5p, miR-125b-2-3p, miR-376a-5p, miR-450b-5p, miR-208b-3p, miR-200c, novel_17, miR-1260a, miR-216a-5p, miR-200c-3p, miR-202-5p, miR-299-3p, novel_96, miR-30b-3p, miR-3653-3p, miR-182-5p, miR-532-5p, miR-365a-3p, miR-139-5p, miR-377-3p, miR-374c-3p, miR-155-5p, miR-450a-1-3p, miR-137-3p, miR-27b-5p, miR-500a-3p, miR-10b-3p, miR-133b-3p, let-7g-3p, novel_99, miR-181a-2-3p, miR-1306-5p, miR-539-5p, miR-214, miR-665-5p, miR-425-5p, miR-133a-3p, miR-3074-2-3p, miR-1260b, miR-374a-3p, miR-6525, miR-181c-5p, miR-2285j, miR-135a-5p, miR-100-3p, miR-6516-3p, miR-450b-3p, miR-130b-5p, miR-374b-3p, miR-500, miR-129-5p, miR-330-3p, miR-2300a-5p, miR-665, novel_116, miR-194-3p, miR-149-5p, miR-450c-3p, miR-1260b, miR-2889, miR-6240, miR-493-5p, miR-130b-5p, miR-377-3p, miR-182-5p, novel_51, miR-330-3p, miR-491-5p, miR-103a-2-5p, miR-214-3p, miR-452-3p, miR-139-5p, novel_68, miR-2285u, miR-3082-5p, miR-299b-3p, miR-7857-3p, miR-25, miR-203-3p, miR-652-3p, miR-136-5p, miR-412-3p, miR-135b-5p, miR-1983, miR-6516-3p, miR-376a-2-5p, miR-493-5p, miR-615, miR-208a-3p, miR-2285n, miR-425-5p, miR-107-5p, miR-1973, miR-2285y, miR-499a-5p, miR-374a-3p</p> |
| RILP | ENSOARGO(Rab inte: | <p>miR-6535, miR-6130, miR-377-3p, miR-370-5p, miR-655-5p, miR-541-5p, miR-221-5p, miR-625-5p, miR-8095, miR-326-3p, miR-214, miR-17-3p, miR-1193, miR-4510, miR-486b-3p, miR-664a, miR-17-3p, miR-370-5p, miR-455-3p, miR-2411-5p, miR-361-5p, miR-30b-3p, miR-330-5p, miR-30b-3p, miR-2904, miR-197-3p, miR-345-3p, miR-2411, miR-486-3p, miR-2432, miR-181a-2-3p, miR-214-3p, miR-21-3p, miR-221-5p, miR-17-3p, miR-345-3p, miR-2411-3p, miR-326, miR-377-3p, novel_115</p>                                                                                                                                                                                                                                                                                                                                                                                                                                                                                                                                                                                                                                                                                                                                                                                                                                                                                                                                                                           |
| PGM5 | ENSOARGO(phosphog  | <p>miR-34b-5p, miR-30b-3p, miR-221-5p, miR-21-3p, miR-664-3p, novel_17, miR-30c-2-3p, miR-500a-5p, miR-490-3p, miR-181a-2-3p, miR-10a-5p, miR-34a-5p, novel_133, miR-193b-5p, miR-1290, miR-140-3p, novel_83, miR-328-3p, miR-2285ad, novel_74, miR-6516-3p, miR-190a-5p, miR-410-3p, miR-551b-3p, miR-5100, miR-369-5p, miR-10b-5p, miR-346, miR-338-3p, miR-6134, miR-10b-3p, miR-1814c, miR-3613-5p, miR-34c-5p, miR-10a, miR-504-5p, miR-140-5p, miR-30c-1-3p, miR-221-5p, miR-874-3p, novel_103, miR-190a, miR-30c-1-3p, miR-3187-3p, miR-758-3p, miR-2310, miR-668-3p, let-7c-3p, miR-33a-5p, miR-369-5p, miR-653, miR-541, miR-10b, novel_23, miR-758-3p, miR-9788-3p, miR-194-3p, miR-340-3p, novel_4, miR-6119-3p, novel_1, miR-147-5p, miR-3613, miR-2285n, miR-142b, miR-576-3p, miR-34c, miR-2285y, miR-449a, miR-541-3p, miR-190b-5p, miR-1291, miR-504, miR-412-3p, miR-9851-3p, miR-1983, miR-6395, miR-140-5p, miR-34b, miR-411b-3p, miR-664b, miR-10a-5p</p>                                                                                                                                                                                                                                                                                                                                                                                                                                                                            |
| ANKH | ENSOARGO(ANKH ino: | <p>miR-3960, miR-3074-5p, miR-154b-5p, novel_133, miR-335-3p, miR-1983, miR-2426, miR-412-3p, miR-1388-3p, miR-3074-5p, miR-4532, miR-486-3p, let-7j, miR-1307-3p, miR-3959-3p, miR-219b-5p, miR-185-3p, miR-2285af, miR-2285j, miR-2433, miR-4492, miR-486b-3p</p>                                                                                                                                                                                                                                                                                                                                                                                                                                                                                                                                                                                                                                                                                                                                                                                                                                                                                                                                                                                                                                                                                                                                                                                      |

|       |                   |                                                                                                                                                                                                                                                                                                                                                                                                                                                                                                                                                                                                                                                                                                                                                                                                                                                                                                                                                                                                                                                                                                                                                                                                                                                                                                                                                                                                                                                                                                                                                                                                                                                                                                                                                                                                                                                                                                                                                                                                                                                                                                                                                                                                                                                                                                                                                                                            |
|-------|-------------------|--------------------------------------------------------------------------------------------------------------------------------------------------------------------------------------------------------------------------------------------------------------------------------------------------------------------------------------------------------------------------------------------------------------------------------------------------------------------------------------------------------------------------------------------------------------------------------------------------------------------------------------------------------------------------------------------------------------------------------------------------------------------------------------------------------------------------------------------------------------------------------------------------------------------------------------------------------------------------------------------------------------------------------------------------------------------------------------------------------------------------------------------------------------------------------------------------------------------------------------------------------------------------------------------------------------------------------------------------------------------------------------------------------------------------------------------------------------------------------------------------------------------------------------------------------------------------------------------------------------------------------------------------------------------------------------------------------------------------------------------------------------------------------------------------------------------------------------------------------------------------------------------------------------------------------------------------------------------------------------------------------------------------------------------------------------------------------------------------------------------------------------------------------------------------------------------------------------------------------------------------------------------------------------------------------------------------------------------------------------------------------------------|
| CTU2  | ENSOARGO(cytosoli | miR-22-3p, miR-616-3p, miR-378g, miR-134-3p, miR-574-5p, miR-3074-5p, miR-2889, miR-2427, miR-22-3p, miR-1197-5p, miR-486-3p, miR-665-5p, miR-3074-5p, miR-145a-3p, miR-31-3p, miR-708-5p, miR-2484, miR-28-5p, miR-486b-3p, miR-2432, miR-486-3p, miR-181b-1-3p, miR-125b-2-3p, miR-376a-5p, miR-503-5p, miR-329a-5p, miR-21-3p, miR-1277-5p, miR-466i-5p, miR-320d, miR-125b, miR-324-3p, miR-216a-5p, miR-210-5p, miR-618, miR-26a-5p, miR-23c, miR-222-5p, miR-23b-3p, miR-487a-3p, miR-30d-3p, miR-485-3p, miR-3600, miR-1b-3p, let-7a-3p, miR-218-1-3p, miR-4429, miR-1193, miR-124-3p, miR-193b-5p, miR-2300b-3p, miR-2366, miR-338-3p, miR-122-5p, miR-425-5p, miR-3074-2-3p, miR-145a-3p, miR-4510, miR-3184-3p, miR-590-3p, miR-130b-5p, miR-4492, miR-129-5p, miR-6516-3p, novel_74, miR-29b-2-5p, miR-324-3p, miR-30a-3p, miR-30e-3p, miR-877-5p, miR-6130, miR-139-5p, miR-544-3p, miR-296-3p, miR-32-3p, miR-32-5p, miR-1827, miR-1895, miR-625-5p, miR-27b-5p, let-7f-1-3p, miR-21a-3p, miR-2310, miR-8485, miR-3187-3p, miR-23a-3p, miR-124a, miR-3085-3p, miR-491-5p, novel_19, miR-326, miR-320b, miR-126a-5p, miR-376b-3p, miR-1298-3p, miR-181b-2-3p, miR-145b, miR-27a-3p, novel_78, miR-105-1, miR-1343-3p, miR-3120-5p, miR-1839-5p, miR-2284aa, miR-101a-5p, miR-544a, miR-2426, miR-501-3p, miR-143-5p, miR-301b-5p, miR-541, miR-6529a, miR-502-3p, miR-452-5p, miR-9-5p, miR-1296-5p, miR-363-3p, miR-541-3p, miR-32-3p, miR-490-5p, miR-3964, miR-4726-5p, miR-301a-5p, miR-371a-5p, miR-101-3p, miR-218-5p, miR-500-3p, miR-27a-3p, miR-4443, miR-376d, miR-2483-3p, miR-3082-5p, miR-378g, miR-211-5p, miR-7977, miR-139-5p, miR-4792, miR-3064-5p, miR-544-5p, miR-376a-3p, miR-136-5p, miR-129b-5p, miR-361-3p, novel_39, miR-29a-5p, miR-450b-5p, miR-29b-2-5p, miR-30a-3p, miR-3064-5p, miR-543-5p, miR-200a-3p, novel_96, miR-1a-2-5p, miR-127-5p, miR-450a-2-3p, miR-125a-3p, miR-205-5p, miR-376b-3p, novel_121, miR-2284z, miR-134-5p, miR-9-5p, miR-1224-5p, miR-7641, miR-429-3p, miR-105-2, miR-128-3p, miR-300, miR-330-5p, miR-501-3p, miR-2284m, miR-17-3p, miR-17-3p, miR-30b-3p, miR-669a-3p, miR-2284k, miR-2285p, miR-217, miR-382-5p, miR-376a-5p, miR-2284l, miR-2284v, miR-382, miR-17-3p, miR-2284j, miR-10b-3p, miR-496, miR-2284x, miR-3065-5p, miR-381-3p, miR-217-5p, miR-3082-5p, miR-545-3p, miR-496-3p, miR-503-3p, miR-1343-3p |
| SNTG1 | ENSOARGO(syntroph |                                                                                                                                                                                                                                                                                                                                                                                                                                                                                                                                                                                                                                                                                                                                                                                                                                                                                                                                                                                                                                                                                                                                                                                                                                                                                                                                                                                                                                                                                                                                                                                                                                                                                                                                                                                                                                                                                                                                                                                                                                                                                                                                                                                                                                                                                                                                                                                            |
| NUPL1 | ENSOARGO(nucleopo |                                                                                                                                                                                                                                                                                                                                                                                                                                                                                                                                                                                                                                                                                                                                                                                                                                                                                                                                                                                                                                                                                                                                                                                                                                                                                                                                                                                                                                                                                                                                                                                                                                                                                                                                                                                                                                                                                                                                                                                                                                                                                                                                                                                                                                                                                                                                                                                            |

|       |                     |                                                                                                                                                                                                                                                                                                                                                                                                                                                                                                                                                                                                                                                                                                                                                                                                                                                                                                                                                                                                                                                                                                                                                                                                                                                                                                                                                                                                                                                                                                                                                                                        |
|-------|---------------------|----------------------------------------------------------------------------------------------------------------------------------------------------------------------------------------------------------------------------------------------------------------------------------------------------------------------------------------------------------------------------------------------------------------------------------------------------------------------------------------------------------------------------------------------------------------------------------------------------------------------------------------------------------------------------------------------------------------------------------------------------------------------------------------------------------------------------------------------------------------------------------------------------------------------------------------------------------------------------------------------------------------------------------------------------------------------------------------------------------------------------------------------------------------------------------------------------------------------------------------------------------------------------------------------------------------------------------------------------------------------------------------------------------------------------------------------------------------------------------------------------------------------------------------------------------------------------------------|
|       |                     | miR-874-3p, miR-2355-5p, miR-125a, miR-141-3p, miR-215-5p, miR-34c-5p, miR-154b-5p, miR-10b-3p, miR-329a, miR-2318, miR-345-5p, miR-23a-5p, miR-1814c, miR-3607-3p, miR-1197-3p, miR-2433, miR-125b-5p, miR-100-3p, miR-138-5p, miR-31-3p, miR-486b-3p, miR-7641, miR-23b-5p, miR-330-5p, miR-10a-5p, miR-3064-5p, miR-4286, miR-148b-5p, miR-28b, miR-2285b, miR-125a-3p, miR-30c-2-3p, miR-217, miR-107, miR-200a-3p, miR-543-5p, novel_68, miR-320b, miR-10a-5p, miR-34b, miR-2387, miR-1306, miR-450b-3p, miR-1291, miR-412-3p, miR-107, miR-146b-5p, miR-1839-3p, novel_101, miR-24-3p, miR-371b-3p, miR-326-3p, miR-449a, miR-4324, miR-6402, miR-28c, miR-34c, novel_1, miR-147-5p, miR-103a-3p, miR-665, miR-185-5p, miR-149-5p, miR-194-3p, miR-103, miR-1285, miR-223-3p, miR-22-3p, miR-138, miR-628-5p, miR-432-3p, miR-345-5p, miR-146a, miR-125a-5p, miR-30c-1-3p, miR-296-3p, miR-10a, miR-192-5p, miR-27a-5p, miR-22-3p, miR-21a-3p, miR-345-5p, miR-1827, miR-214, miR-10b-5p, miR-6525, miR-3184-5p, miR-15b-3p, miR-2285j, miR-3604, miR-4492, miR-532-3p, novel_133, miR-362-3p, miR-215-5p, miR-124-3p, miR-217-5p, miR-378d, miR-34a-5p, miR-2424, miR-486-3p, miR-146a-5p, miR-210-5p, miR-618, miR-324-3p, miR-125b, miR-92a-1-5p, miR-185-3p, miR-202-5p, miR-760-3p, miR-34b-5p, miR-3064-5p, miR-10b, miR-499b-5p, miR-1983, miR-541-3p, miR-423-5p, miR-329-3p, miR-541, miR-10b, miR-362-3p, miR-124a, miR-1388-3p, miR-744-3p, miR-30c-1-3p, miR-4532, miR-2310, miR-1b-5p, miR-1306-5p, miR-326, miR-362-3p, miR-505, miR-3085-3p, miR-146b, miR-214-3p |
| YBEY  | ENSOARGOC ybeY met. | miR-324-5p, miR-545-5p, miR-23b-3p, miR-34c-5p, miR-34b, miR-23c, miR-30c-1-3p, miR-34a-5p, miR-1827, miR-30b-3p, miR-2904, miR-30b-3p, miR-23b, miR-181a-5p, miR-449a, miR-181c-5p, miR-30c-1-3p, miR-23a-3p, miR-181d-5p, miR-433-5p, miR-4492, miR-34b-5p, miR-181b-5p, miR-34c, miR-30c-2-3p, novel_51, miR-185-3p                                                                                                                                                                                                                                                                                                                                                                                                                                                                                                                                                                                                                                                                                                                                                                                                                                                                                                                                                                                                                                                                                                                                                                                                                                                                 |
| LGMN  | ENSOARGOC legumain  |                                                                                                                                                                                                                                                                                                                                                                                                                                                                                                                                                                                                                                                                                                                                                                                                                                                                                                                                                                                                                                                                                                                                                                                                                                                                                                                                                                                                                                                                                                                                                                                        |
| GSTP1 | ENSOARGOC glutathi. | miR-133b-3p, miR-6525, miR-1343-3p, miR-133a-3p                                                                                                                                                                                                                                                                                                                                                                                                                                                                                                                                                                                                                                                                                                                                                                                                                                                                                                                                                                                                                                                                                                                                                                                                                                                                                                                                                                                                                                                                                                                                        |

miR-452-3p, miR-2319b, miR-664b, miR-211-5p, miR-499b-5p, miR-378g, miR-25, miR-499a-3p, miR-378e, miR-361-3p, miR-129b-5p, miR-504, miR-136-5p, novel\_94, miR-877-3p, miR-212-3p, miR-3956-3p, novel\_60, miR-3059-5p, miR-2447, miR-452-5p, miR-1296-5p, miR-423-5p, miR-107-5p, miR-769-5p, miR-4726-5p, miR-7134-3p, miR-2285t, novel\_78, novel\_4, miR-409b, miR-181b-2-3p, miR-142-5p, miR-2285e, miR-455-3p, miR-10b, miR-378b, miR-296-5p, miR-484, miR-758-3p, miR-125b-2-3p, miR-450b-5p, miR-544a, miR-378c, miR-1388-5p, miR-424-5p, miR-1839-3p, miR-30c-1-3p, miR-378d, miR-758-3p, miR-3187-3p, miR-8485, miR-431-5p, miR-326, miR-1306-5p, miR-320b, miR-16b, miR-29b-1-5p, novel\_124, miR-103a-2-5p, miR-214-3p, miR-496-3p, miR-30c-1-3p, miR-504-5p, miR-545-3p, miR-378a-3p, miR-2331-3p, miR-532-5p, miR-296-3p, miR-3065-3p, miR-544-3p, miR-377-3p, miR-10a, miR-582-5p, miR-499b-3p, miR-15b-5p, novel\_25, novel\_32, miR-22-3p, miR-204-3p, let-7f-1-3p, miR-2285c, miR-433-3p, miR-411, miR-129b-3p, miR-27b-5p, miR-339b, let-7g-3p, novel\_99, miR-3074-5p, miR-3184-3p, miR-378c, miR-214, miR-665-5p, miR-98-3p, miR-346, miR-142a-5p, miR-769-5p, miR-10b-5p, miR-6134, miR-3184-5p, let-7b-3p, miR-665, miR-664a, miR-17-3p, miR-130b-5p, miR-4492, miR-424-5p, miR-3600, miR-200b, miR-15a-5p, miR-383-5p, miR-1246, miR-2366, miR-378i, miR-1197-5p, miR-5703, miR-378a-3p, miR-98-3p, miR-4429, miR-19b-3p, miR-493-3p, let-7a-3p, miR-133a-3p, miR-216c-5p, miR-345-3p, miR-181b-1-3p, miR-125b-2-3p, miR-376a-5p, miR-29b-1-5p, miR-380-3p, miR-2432, novel\_17, miR-210-5p, miR-196a-3p, miR-125b, miR-422a, miR-324-3p, miR-320d, miR-21-3p, miR-3074-5p, novel\_68, miR-10a-5p, miR-411b-3p, miR-29a-3p, miR-181b-3p, miR-320c, miR-677, miR-1306, miR-19a-3p, miR-1291, miR-378f, miR-195a-5p, miR-7975, miR-135a-2-3p, miR-29c-3p, miR-

IFNGR2 ENSOARGO( interfer

miR-7857, miR-412-3p, miR-30b-3p, miR-329-3p, miR-362-3p, miR-101a-5p, miR-216a-3p, miR-9788-3p, miR-1185-3p, miR-421, miR-505, miR-362-3p, miR-16b, miR-326, miR-3955-3p, miR-130b-3p, let-7c-3p, miR-1839-3p, miR-424-5p, miR-494-3p, miR-8485, miR-2310, miR-381-3p, novel\_94, miR-1983, miR-3963, miR-499b-5p, miR-211-5p, miR-2284g, miR-452-3p, miR-1185-2-3p, miR-371a-5p, miR-2285n, miR-218-5p, miR-490-5p, miR-154-3p, miR-3958-3p, miR-181d-5p, miR-98-3p, miR-5703, novel\_133, miR-362-3p, miR-2366, miR-16-1-3p, miR-218-1-3p, let-7a-3p, miR-2284u, miR-1b-3p, miR-30d-3p, miR-485-3p, miR-487a-3p, miR-15a-5p, miR-200b, miR-92a-1-5p, miR-196a-3p, miR-345-3p, miR-487a, miR-486-3p, miR-130a-5p, miR-655, let-7f-1-3p, let-7g-3p, miR-154b-3p, miR-3065-3p, miR-154a-3p, miR-296-3p, miR-545-3p, miR-660-5p, miR-15b-5p, miR-6130, miR-30a-3p, miR-338-5p, miR-655-3p, let-7b-3p, miR-30e-3p, miR-424-5p, miR-454-3p, miR-669a-3p, miR-4510, miR-338-3p, miR-181c-5p, miR-98-3p, miR-181a-5p, miR-497-5p, miR-455-5p, miR-29b, miR-30b-3p, miR-16b, miR-16-1-3p, miR-130a-3p, miR-3955-5p, miR-6238, miR-412-5p, miR-197-5p, novel\_51, miR-455-5p, miR-452-5p, miR-660, miR-466f-3p, miR-539-3p, miR-432-3p, miR-432-3p, miR-21c, miR-9851-3p, miR-195a-5p, miR-412-3p, miR-19a-3p, miR-7-1-3p, miR-216b-3p, miR-6535, miR-29a-3p, miR-670-3p, miR-16a, miR-15a, miR-576-3p, miR-203b-5p, novel\_1, miR-29a, miR-1839-3p, miR-29c-3p, miR-2285x, miR-1a-1-5p, miR-326-3p, miR-2428, miR-301b-3p, miR-2284w, miR-211, miR-29d-3p, miR-330-5p, miR-134, miR-200b-3p, miR-412, miR-429-3p, miR-545-5p, miR-134-5p, miR-322-5p, miR-125a-3p, miR-200c, miR-200a-3p, miR-1a-2-5p, miR-181b-5p, miR-200c-3p, miR-30a-3p, novel\_39, miR-200a, miR-3065-3p, miR-2284y, miR-1271-3p, miR-450b-5p, miR-137-3p, miR-2154, miR-301, miR-1814c, miR-767, miR-329a, miR-141-3p, miR-499a-5p, miR-2284ab, miR-6516-3p, miR-544-5p, miR-186-5p, miR-19b-2-5p, miR-19b-1-5p, miR-3065-5p, miR-582-5p, miR-29a-5p, miR-7641, miR-26b-3p, miR-7-1-3p

CCDC126 ENSOARGO(coiled-coiled) miR-212-5p, miR-331-3p, miR-132-5p, miR-2300a-5p, miR-874-5p, miR-941, miR-4726-5p

LAMP2 ENSOARGO(lysosomal) miR-877-5p, miR-155-5p, miR-29a-3p, miR-6130, miR-378e, miR-3596, miR-3120-3p, miR-3065-3p, miR-378b, miR-378a-3p, miR-378f, miR-1827, miR-345-5p, miR-345-5p, miR-129b-3p, miR-378c, miR-3074-2-3p, miR-29c-3p, miR-4510, miR-145a-3p, miR-378c, miR-134-5p, miR-22-5p, miR-29a, miR-155-5p, miR-499a-5p, miR-3968, miR-29b-3p, miR-134-5p, miR-582-3p, miR-378h, miR-155-5p, miR-378c, miR-29b, miR-378a-3p, miR-29d-3p, miR-2427, miR-1285, miR-3578, miR-134, miR-484, miR-378b, miR-378i, miR-345-5p, miR-3065-3p, miR-8485, miR-378d, miR-345-3p, miR-466f-3p, miR-422a

SYT7 ENSOARGO(synaptotagmin) novel\_42, miR-29c-3p, miR-2903, miR-3065-3p, miR-133a-5p, miR-2433, miR-29b-3p, novel\_19, miR-29a, miR-452-3p, miR-145b, miR-3065-3p, miR-29a-3p, miR-421, miR-9788-3p, miR-21a-3p, miR-145a-5p, miR-29d-3p, miR-29b

IFNAR1 ENSOARGO(interferon) miR-3065-3p, miR-29a-3p, miR-421, miR-9788-3p, miR-21a-3p, miR-145a-5p, miR-29d-3p, miR-29b

MAP4K4 ENSOARGO(mitogen-activated protein kinase) miR-3065-3p, miR-29a-3p, miR-421, miR-9788-3p, miR-21a-3p, miR-145a-5p, miR-29d-3p, miR-29b

|        |                    |                                                                                                                                                                                                                                                                                                                                                                                                                                                                                                                                                                                                                                                                     |
|--------|--------------------|---------------------------------------------------------------------------------------------------------------------------------------------------------------------------------------------------------------------------------------------------------------------------------------------------------------------------------------------------------------------------------------------------------------------------------------------------------------------------------------------------------------------------------------------------------------------------------------------------------------------------------------------------------------------|
| RNF166 | ENSOARGO(ring fin) | miR-1895, miR-744-5p, miR-19b-3p, miR-19a-3p, miR-2285k, miR-1306, miR-2366, miR-148a-3p, miR-669, miR-9788-3p, miR-301a-3p, miR-148b-3p, miR-130a-3p, miR-3065-3p, miR-454-3p, miR-152-3p, miR-4726-5p, miR-2285l, miR-130b-3p, novel_82, miR-1306-5p, miR-423-5p, miR-3065-3p, miR-3184-5p, miR-301b-3p, miR-2285i, miR-361-3p, novel_42, miR-183-5p<br>miR-34c, miR-301a-5p, miR-107-5p, miR-34c-3p, novel_63, miR-502-5p, miR-370-5p, miR-101-3p, miR-449a, miR-181c-5p, miR-877-3p, miR-1296-5p, miR-181d-5p, miR-1193, miR-495-3p, miR-543-3p, miR-1983, miR-329b, miR-412-3p, miR-203-3p, miR-1185-2-3p, miR-34c-5p, miR-34b, miR-370-5p, miR-664b, miR-329- |
| MTMR6  | ENSOARGO(myotubul) | 5p, miR-34b-5p, miR-103a-2-5p, miR-181b-5p, miR-105-5p, miR-196a-3p, miR-2285af, novel_17, miR-664-3p, miR-377-5p, miR-668-3p, let-7f-2-3p, let-7f-2-3p, miR-329a-5p, miR-216c-5p, miR-101b-3p, miR-382-3p, miR-105-2, miR-16-2-3p, miR-34a-5p, miR-181a-5p, miR-301b-5p, miR-143-5p, miR-126a-5p, miR-1185-3p, miR-377-5p, miR-105-1<br>miR-744-5p, miR-29b, miR-19b-3p, miR-29d-3p, miR-124-3p, miR-1343-5p, miR-1197-5p, miR-125b-2-3p, miR-191, miR-541, miR-301b-5p, miR-194-3p, miR-2284h-5p, miR-134-3p, miR-212-5p, miR-6517, miR-133b-5p, miR-409b, miR-125a-5p, miR-1343-5p, miR-214-3p, miR-487b-5p, miR-125b, miR-185-                                  |
| HIP1   | ENSOARGO(huntingt) | 3p, novel_17, miR-3065-3p, miR-4532, miR-2284l, miR-124a, miR-329a-5p, miR-2285w, novel_94, miR-19a-3p, miR-378g, miR-29a-3p, miR-3065-3p, miR-320b, miR-125a, miR-329-5p, miR-4492, miR-487a-5p, miR-191-5p, miR-2284q, novel_74, miR-29a, miR-125b-5p, miR-301a-5p, miR-425-5p, novel_82, miR-29b-3p, miR-4324, miR-6529b, miR-1197-3p, miR-214, miR-29c-3p, miR-3059-5p, miR-541-3p<br>miR-92a-3p, miR-502-5p, miR-2332, miR-371a-5p, miR-320e, miR-3969, miR-877-3p, novel_44, novel_120, miR-3059-5p, miR-342-3p, miR-363-3p, miR-212-3p, miR-2285x, miR-214, miR-186-5p, miR-433-3p, miR-18a-3p, miR-3591-3p, miR-25, miR-25-                                 |
| DUSP10 | ENSOARGO(dual spe) | 3p, miR-22-3p, miR-144-3p, miR-32-5p, miR-363, miR-874-3p, miR-329-5p, miR-21-3p, novel_127, miR-214-3p, miR-92a-3p, miR-21-3p, miR-342, miR-210-5p, miR-618, miR-216a-5p, miR-32, miR-664b-3p, miR-92b-3p, miR-8485, miR-216c-5p, miR-2330-5p, miR-382-3p, miR-181a-2-3p, miR-2426, miR-2284x, miR-223-3p, miR-22-3p, novel_23, miR-1197-5p, miR-3071-5p, miR-95-3p, miR-421, miR-18a-3p, miR-548w                                                                                                                                                                                                                                                                 |



miR-313-3p, miR-101-3p, novel\_12, miR-10-3p, miR-110-  
 3p, miR-1260b, miR-23b, miR-876-3p, miR-2318, miR-345-5p, miR-  
 1248, miR-874-3p, miR-2355-5p, miR-223-5p, miR-133c, miR-127-  
 5p, novel\_127, miR-450b-5p, miR-200a, miR-23b-5p, miR-330-  
 5p, miR-2285ad, miR-6517, novel\_79, miR-322-5p, miR-9-5p, miR-  
 134-5p, miR-486-5p, miR-129-1-3p, miR-485-3p, miR-379-3p, miR-  
 301b-3p, miR-1306, miR-411b-3p, miR-677, miR-669, miR-144-  
 3p, miR-320c, miR-181b-3p, miR-7-5p, miR-377-3p, miR-2411-  
 3p, miR-194a, novel\_51, miR-6240, miR-628-5p, miR-432-3p, miR-  
 432-3p, let-7a-2-3p, miR-19b-2-5p, miR-432, miR-7b-5p, miR-  
 16b, miR-26a-2-3p, miR-497-5p, miR-27b-3p, miR-188-5p, miR-  
 2284x, miR-339-5p, miR-3535, miR-134-3p, miR-15b-  
 3p, novel\_74, miR-451a, miR-500, miR-129-5p, miR-454-3p, miR-  
 3184-3p, miR-129-2-3p, miR-129b-3p, miR-500a-3p, miR-411, miR-  
 345-5p, miR-339b, miR-543-3p, miR-625-5p, miR-186-5p, miR-  
 1827, miR-2331-3p, miR-30c-1-3p, miR-548o-3p, miR-301a-  
 3p, miR-582-5p, miR-377-3p, miR-216b-5p, miR-15b-5p, miR-210-  
 5p, miR-618, miR-219b-5p, miR-345-3p, miR-486-3p, miR-133a-  
 3p, miR-148a-5p, miR-34a-5p, miR-361-5p, miR-18a-3p, miR-212-  
 5p, miR-7859, miR-95-3p, miR-210-3p, miR-23b-3p, miR-  
 23c, novel\_82, miR-2440, miR-301a-5p, miR-499a-5p, miR-490-  
 5p, miR-3956-3p, miR-9-5p, miR-877-3p, miR-7705, miR-140-  
 5p, miR-299b-5p, miR-376a-3p, miR-544-5p, miR-9-3p, miR-139-  
 5p, miR-7689-3p, miR-211-5p, miR-378g, miR-25, miR-3596, miR-  
 2483-3p, miR-203-3p, miR-500-3p, miR-182-5p, miR-16b, miR-  
 130b-3p, miR-23a-3p, miR-8485, miR-2310, miR-301b-5p, miR-501-  
 3p, miR-101c, novel\_78, miR-330-3p, miR-1343-3p, miR-181b-2-  
 3p, miR-1298-3p, miR-147a, miR-148b-5p, miR-455-3p, miR-  
 2459, miR-5100, miR-2332, miR-331-3p, miR-144, miR-31-3p, miR-  
 486b-3p, miR-204-5p, miR-6128, miR-488-3p, miR-320a, miR-  
 NOSIP ENSOARGO(nitric o. 3154, let-7g-3p, miR-7144-5p, miR-671-5p, miR-1814c, miR-370-  
 miR-496-3p, miR-574-5p, miR-378a-3p, miR-6516, miR-544-  
 3p, miR-877-5p, miR-2448-3p, miR-450a-1-3p, miR-2285c, miR-  
 23b, miR-27b-5p, miR-329b, miR-2312, let-7g-3p, miR-186-  
 5p, miR-485-5p, miR-2284v, miR-145a-3p, miR-378c, miR-  
 1271, miR-6134, miR-378c, miR-2332, miR-2284k, miR-3969, miR-  
 144, miR-664a, miR-450b-3p, miR-204-5p, miR-3432a, miR-874-  
 5p, miR-3600, miR-380-5p, miR-1271-5p, miR-6516-5p, miR-  
 23c, miR-378h, miR-23b-3p, miR-450a-1-3p, miR-199a-3p, miR-  
 378i, miR-3591-5p, miR-1197-5p, miR-1434-5p, miR-378a-3p, miR-  
 218-2-3p, miR-142-3p, miR-496, miR-378d, miR-105-2, miR-128-  
 3p, miR-183-5p, miR-369-3p, miR-380-5p, miR-2285p, miR-  
 RABGAP1L ENSOARGO(RAB GTPa 422a, miR-466i-5p, miR-127-5p, miR-2284m, miR-20a-3p, miR-  
 378b, miR-2319b, novel\_68, miR-7-1-3p, miR-211-5p, miR-541-  
 5p, novel\_69, miR-378e, miR-144-3p, miR-2285ab, miR-216a-  
 3p, miR-136-5p, miR-450b-3p, miR-96-5p, novel\_94, miR-6516-  
 3p, miR-505-3p, miR-378f, miR-2319a, miR-3956-  
 3p, novel\_60, novel\_120, miR-758-5p, miR-2284j, miR-2285f, miR-  
 211, miR-2428, miR-8095, miR-133a-5p, miR-218-5p, novel\_1, miR-  
 199c, miR-502b, miR-1343-3p, miR-199b-3p, miR-105-1, miR-26b-  
 3p, miR-2285g, miR-544b, miR-421, miR-2459, miR-2285e, miR-  
 9788-3p, novel\_116, miR-378b, miR-450c-3p, miR-544a, miR-  
 2284ab, miR-378c, miR-188-5p, miR-2284x, miR-101b-3p, miR-380-  
 5p, miR-23a-3p, miR-378d, miR-2285r, miR-199a-3p, miR-105-5p

VSTM2A ENSOARGO(V-set an miR-877-3p, novel\_1  
miR-6128, miR-1306-5p, miR-14b-3p, miR-323-3p, miR-331-  
3p, miR-134-5p, miR-28-5p, miR-486b-3p, miR-31-3p, miR-410-  
3p, miR-370-3p, miR-2355-5p, miR-2285aa, miR-223-5p, miR-300-  
3p, miR-381-3p, miR-485-5p, miR-671-5p, miR-7144-5p, miR-  
329a, miR-4286, miR-3064-5p, miR-29b-2-5p, miR-2285b, miR-192-  
3p, miR-2284a, novel\_39, miR-200a, miR-1957a, miR-2284y, miR-  
3065-3p, miR-28b, miR-217, miR-8117, miR-2285af, novel\_96, miR-  
181b-5p, miR-6517, miR-299a-3p, novel\_121, miR-134-5p, miR-  
582-3p, miR-2411-5p, miR-330-5p, miR-7134-5p, miR-2427, miR-  
1343-5p, miR-134, miR-3591-5p, miR-300, novel\_101, miR-219b-  
3p, miR-2428, miR-326-3p, miR-371b-3p, miR-24-3p, miR-  
142b, miR-28c, miR-502-5p, miR-1247-3p, miR-147-5p, miR-421-  
5p, novel\_1, miR-3120-3p, miR-3074-5p, miR-363, miR-669, miR-  
677, miR-299b-3p, miR-3065-5p, miR-1306, miR-505-3p, miR-  
2285k, miR-450b-3p, miR-363-5p, miR-668-3p, miR-503-3p, miR-  
654-3p, miR-194a, miR-377-3p, miR-224-5p, miR-1343-5p, miR-  
124-5p, miR-187-3p, miR-340-3p, miR-194-3p, miR-6238, miR-185-  
5p, miR-134-3p, miR-194-5p, miR-181a-5p, miR-188-5p, miR-  
2889, miR-3074-5p, miR-4510, miR-181c-5p, miR-3184-5p, miR-  
224-5p, miR-655-3p, miR-665, miR-29b-2-5p, miR-324-3p, miR-  
2285j, miR-708-5p, miR-664a, miR-552-3p, miR-3065-3p, miR-  
216b-3p, miR-221-5p, miR-204-3p, miR-6130, miR-377-3p, miR-  
27a-5p, miR-655, miR-27b-5p, miR-21a-3p, miR-186-5p, miR-  
2312, miR-369-3p, miR-2411, miR-486-3p, miR-29b-1-5p, miR-  
2285i, miR-299-3p, miR-21-3p, miR-3653-3p, miR-221-5p, miR-  
505-3p, miR-3600, novel\_83, miR-616-3p, miR-1247-5p, miR-383-  
5p, miR-140-3p, miR-217-5p, miR-362-3p, miR-2408, miR-148a-  
5p, miR-2284u, miR-664-5p, miR-133a-3p, miR-941, miR-184-  
3p, miR-181d-5p, miR-194b-5p, miR-212-3p, miR-2447, miR-423-  
5p, miR-361-3p, novel\_82, miR-2285n, miR-2284q, miR-3968, miR-  
3064-5p, miR-378a, miR-3596, miR-381-3p, miR-361-  
miR-22-5p, miR-7134-3p, miR-421-5p, miR-206, miR-6119-3p, miR-  
382-5p, let-7i, miR-6402, miR-28c, miR-218-5p, miR-  
323c, novel\_101, miR-2285f, miR-3956-3p, novel\_60, miR-  
4454, let-7e-5p, miR-19a-3p, miR-3591-3p, miR-2285ab, miR-203-  
3p, let-7d-5p, miR-3082-5p, miR-7977, miR-3120-3p, miR-329-  
5p, miR-10b, miR-466f-3p, let-7e, miR-153-3p, miR-3955-3p, miR-  
130b-3p, miR-491-5p, miR-1185-5p, miR-455-5p, miR-29b-1-  
5p, miR-197-5p, miR-431-5p, miR-2310, miR-1b-5p, miR-8485, miR-  
2285r, let-7a-5p, miR-455-5p, miR-7862, miR-16-1-3p, miR-3071-  
5p, miR-1a-3p, miR-1843b-5p, miR-455-3p, let-7g-5p, miR-  
3535, miR-153, miR-130a-3p, novel\_78, miR-454-  
3p, novel\_9, novel\_74, miR-338-5p, miR-2332, let-7f, miR-15b-  
3p, miR-6134, let-7b-5p, miR-206-3p, miR-1306-5p, let-7b, miR-  
186-5p, miR-1814c, miR-7144-5p, miR-329b, let-7g-3p, miR-129b-  
3p, miR-21a-3p, let-7i-5p, miR-301a-3p, miR-141-3p, miR-21-  
3p, miR-548o-3p, miR-496-3p, miR-503-3p, miR-140-5p, let-  
7k, novel\_96, miR-6536, miR-98-5p, let-7f-5p, let-7c-5p, miR-  
2285p, miR-2285af, miR-205-5p, miR-1271-3p, let-7g, miR-  
28b, miR-1, miR-329a-5p, miR-496, miR-133a-3p, miR-16-1-  
3p, miR-19b-3p, let-7d, miR-188-3p, miR-5703, miR-218-2-  
3p, miR-1961, miR-3591-5p, miR-486-5p, miR-7859, miR-431, miR-  
7641, miR-3600, miR-548e-3p

SPPL3 ENSOARGO(signal p  
654-3p, miR-194a, miR-377-3p, miR-224-5p, miR-1343-5p, miR-  
124-5p, miR-187-3p, miR-340-3p, miR-194-3p, miR-6238, miR-185-  
5p, miR-134-3p, miR-194-5p, miR-181a-5p, miR-188-5p, miR-  
2889, miR-3074-5p, miR-4510, miR-181c-5p, miR-3184-5p, miR-  
224-5p, miR-655-3p, miR-665, miR-29b-2-5p, miR-324-3p, miR-  
2285j, miR-708-5p, miR-664a, miR-552-3p, miR-3065-3p, miR-  
216b-3p, miR-221-5p, miR-204-3p, miR-6130, miR-377-3p, miR-  
27a-5p, miR-655, miR-27b-5p, miR-21a-3p, miR-186-5p, miR-  
2312, miR-369-3p, miR-2411, miR-486-3p, miR-29b-1-5p, miR-  
2285i, miR-299-3p, miR-21-3p, miR-3653-3p, miR-221-5p, miR-  
505-3p, miR-3600, novel\_83, miR-616-3p, miR-1247-5p, miR-383-  
5p, miR-140-3p, miR-217-5p, miR-362-3p, miR-2408, miR-148a-  
5p, miR-2284u, miR-664-5p, miR-133a-3p, miR-941, miR-184-  
3p, miR-181d-5p, miR-194b-5p, miR-212-3p, miR-2447, miR-423-  
5p, miR-361-3p, novel\_82, miR-2285n, miR-2284q, miR-3968, miR-  
3064-5p, miR-378a, miR-3596, miR-381-3p, miR-361-  
miR-22-5p, miR-7134-3p, miR-421-5p, miR-206, miR-6119-3p, miR-  
382-5p, let-7i, miR-6402, miR-28c, miR-218-5p, miR-  
323c, novel\_101, miR-2285f, miR-3956-3p, novel\_60, miR-  
4454, let-7e-5p, miR-19a-3p, miR-3591-3p, miR-2285ab, miR-203-  
3p, let-7d-5p, miR-3082-5p, miR-7977, miR-3120-3p, miR-329-  
5p, miR-10b, miR-466f-3p, let-7e, miR-153-3p, miR-3955-3p, miR-  
130b-3p, miR-491-5p, miR-1185-5p, miR-455-5p, miR-29b-1-  
5p, miR-197-5p, miR-431-5p, miR-2310, miR-1b-5p, miR-8485, miR-  
2285r, let-7a-5p, miR-455-5p, miR-7862, miR-16-1-3p, miR-3071-  
5p, miR-1a-3p, miR-1843b-5p, miR-455-3p, let-7g-5p, miR-  
3535, miR-153, miR-130a-3p, novel\_78, miR-454-  
3p, novel\_9, novel\_74, miR-338-5p, miR-2332, let-7f, miR-15b-  
3p, miR-6134, let-7b-5p, miR-206-3p, miR-1306-5p, let-7b, miR-  
186-5p, miR-1814c, miR-7144-5p, miR-329b, let-7g-3p, miR-129b-  
3p, miR-21a-3p, let-7i-5p, miR-301a-3p, miR-141-3p, miR-21-  
3p, miR-548o-3p, miR-496-3p, miR-503-3p, miR-140-5p, let-  
7k, novel\_96, miR-6536, miR-98-5p, let-7f-5p, let-7c-5p, miR-  
2285p, miR-2285af, miR-205-5p, miR-1271-3p, let-7g, miR-  
28b, miR-1, miR-329a-5p, miR-496, miR-133a-3p, miR-16-1-  
3p, miR-19b-3p, let-7d, miR-188-3p, miR-5703, miR-218-2-  
3p, miR-1961, miR-3591-5p, miR-486-5p, miR-7859, miR-431, miR-  
7641, miR-3600, miR-548e-3p

CLTC ENSOARGO(clathrin  
3p, novel\_9, novel\_74, miR-338-5p, miR-2332, let-7f, miR-15b-  
3p, miR-6134, let-7b-5p, miR-206-3p, miR-1306-5p, let-7b, miR-  
186-5p, miR-1814c, miR-7144-5p, miR-329b, let-7g-3p, miR-129b-  
3p, miR-21a-3p, let-7i-5p, miR-301a-3p, miR-141-3p, miR-21-  
3p, miR-548o-3p, miR-496-3p, miR-503-3p, miR-140-5p, let-  
7k, novel\_96, miR-6536, miR-98-5p, let-7f-5p, let-7c-5p, miR-  
2285p, miR-2285af, miR-205-5p, miR-1271-3p, let-7g, miR-  
28b, miR-1, miR-329a-5p, miR-496, miR-133a-3p, miR-16-1-  
3p, miR-19b-3p, let-7d, miR-188-3p, miR-5703, miR-218-2-  
3p, miR-1961, miR-3591-5p, miR-486-5p, miR-7859, miR-431, miR-  
7641, miR-3600, miR-548e-3p

novel\_69, miR-134-3p, miR-378g, miR-326-3p, miR-1271, novel\_79, miR-2355-5p, miR-339-5p, miR-339b, miR-1895, miR-326, miR-361-3p, miR-330-5p, miR-339a, miR-324-3p, miR-30f, miR-21a-3p, miR-193b-3p, miR-6130, miR-27a-5p, miR-877-5p, miR-204-3p, novel\_25, miR-3065-3p, miR-6516-3p, miR-664a, miR-708-5p, miR-424-5p, miR-320e, miR-29b-2-5p, miR-10b-5p, miR-338-3p, miR-6134, miR-145a-3p, miR-4510, miR-539-5p, miR-4429, miR-19b-3p, miR-2300b-3p, novel\_133, miR-1197-5p, miR-188-3p, miR-2904, miR-200b, miR-148b-3p, miR-15a-5p, miR-222-5p, novel\_83, miR-532-3p, miR-151-5p, miR-505-3p, miR-466i-5p, miR-760-3p, miR-2284m, miR-106a, miR-320d, miR-21-3p, miR-34b-5p, miR-30d, miR-30b-3p, miR-196a-3p, miR-185-3p, miR-125b, miR-216a-5p, miR-2432, miR-20a, novel\_94, miR-27a-3p, miR-3064-5p, miR-7977, miR-335, miR-4726-5p, miR-2285n, miR-30b-5p, miR-2285y, miR-362-5p, miR-541-3p, novel\_60, miR-181d-5p, miR-2426, miR-10b, miR-296-5p, miR-30b-3p, miR-216a-3p, miR-9788-3p, miR-500-5p, miR-2300a-5p, miR-27a-3p, miR-3085-3p, novel\_124, novel\_115, novel\_103, miR-326, miR-320b, miR-193a, miR-3187-3p, miR-424-5p, miR-106a-5p, miR-2330-5p, miR-320a, miR-17-5p, miR-362-5p, miR-3154, miR-365a-3p, miR-3965, miR-374c-3p, miR-34c-5p, miR-324-5p, miR-141-3p, miR-615-5p, miR-28-5p, miR-486b-3p, miR-31-3p, miR-331-3p, miR-26c, miR-93, miR-500b-5p, miR-2903, miR-365a-5p, miR-10a-5p, miR-200b-3p, miR-128-3p, miR-345-3p, miR-30a-5p, miR-302a-5p, miR-24-2-5p, miR-582-3p, miR-200c-3p, miR-181b-5p, miR-191-3p, miR-450a-2-3p, miR-543-5p, miR-200c, miR-1260a, miR-2285af, miR-339a, miR-28b, miR-3065-3p, miR-181a-2-3p, miR-2385-3p, miR-29b-2-5p, miR-19a-3p, miR-1291, miR-505-3p, miR-6395, miR-195a-5p, miR-7975, miR-34b, miR-670-3p, miR-10a-5p, miR-147-5p, miR-6402, miR-20a-5p, miR-502-5p, miR-15a, miR-382-5p, miR-34c, miR-16a, miR-3959-3p, miR-24-3p, miR-2428, miR-449a, miR-326-3p, miR-136-3p, miR-1260b, miR-30b-3p, miR-2284ab, miR-744-5p, miR-181a-5p, miR-185-5p, miR-

SMARCB1 ENSOARGO(SWI/SNF)

DCAF7 ENSOARGO(DDB1 and

miR-16a, miR-218-5p, miR-15a, miR-2285t, miR-495-3p, miR-1296-5p, miR-3956-3p, novel\_60, miR-3059-5p, miR-301b-3p, miR-199b-5p, miR-374c-5p, miR-148a-3p, miR-199b-5p, miR-195a-5p, miR-6516-3p, miR-107, miR-96-5p, miR-374b-5p, miR-4792, miR-374c-3p, miR-3082-5p, miR-299b-3p, miR-378g, miR-16b, miR-29b-1-5p, miR-431-5p, miR-452-5p, miR-199b-5p, miR-130b-3p, miR-628-5p, miR-363-5p, miR-424-5p, miR-2310, miR-3187-3p, miR-432-3p, miR-374b-3p, miR-145a-5p, miR-125b-2-3p, miR-1434-3p, miR-223-3p, miR-296-5p, miR-497-5p, miR-16-1-3p, miR-544a, miR-2426, miR-16b, miR-145b, miR-130a-3p, miR-103a-3p, miR-3955-5p, miR-103, miR-134-3p, miR-29b-2-5p, miR-409-3p, miR-424-5p, miR-454-3p, miR-665-5p, miR-133a-3p, miR-3074-2-3p, miR-16-5p, miR-1271, miR-145-3p, miR-186-5p, miR-1814c, miR-2318, let-7g-3p, miR-133b-3p, miR-10a-3p, miR-10b-3p, miR-552-3p, miR-532-5p, miR-548o-3p, miR-15b-5p, novel\_25, miR-199a-5p, miR-544-3p, miR-301a-3p, miR-374c-3p, miR-185-3p, miR-125a-3p, miR-26a-5p, miR-2397-5p, miR-374a-5p, miR-205-5p, miR-152-3p, miR-299-3p, miR-107, miR-6536, miR-2898, miR-29b-2-5p, miR-10a-3p, miR-216c-5p, miR-2424, miR-199a-5p, miR-376a-5p, miR-29b-1-5p, miR-2904, miR-2427, miR-1290, miR-16-1-3p, miR-212-5p, miR-431, miR-3600, miR-299a-3p, miR-548e-3p, novel\_121, miR-15a-5p, miR-148b-3p, miR-1271-5p, miR-7859, miR-322-5p, novel\_120, miR-211, let-7i, miR-133a-5p, miR-20a-5p, miR-22-5p, miR-421-5p, miR-6119-3p, novel\_1, miR-379-3p, miR-3120-3p, miR-216b-3p, miR-670-3p, miR-18a-3p, miR-21c, miR-3591-3p, let-7e-5p, miR-2285k, miR-382, miR-539-3p, miR-654-3p, miR-17-5p, miR-106a-5p, miR-224-5p, miR-377-3p, miR-466f-3p, miR-196b-5p, miR-26b-3p, miR-194-3p, miR-2355-3p, miR-20b, miR-412-5p, let-7g-5p, miR-1285, miR-1434-3p, miR-2284x, miR-2284ab, miR-21-5p, miR-380-3p, miR-144-5p, miR-103b, miR-93, miR-2284k, miR-2332, miR-204-5p, miR-2285aa, miR-370-3p, miR-1271, miR-141-3p, miR-3957-5p, miR-487a-3p, miR-3957, miR-2284n, miR-93-5p, miR-17-5p, miR-20b-5p, miR-3074-1-3p, miR-876-3p, let-7g, miR-192-3p, miR-3071-3p, let-7c-5p, novel\_127, miR-200a-3p, let-7f-5p, miR-2285ad, miR-582-3p, miR-6516-5p, miR-196a-5p, miR-155-5p, let-7d, miR-3059-5p, miR-212-3p, miR-2285y, miR-2285n, miR-218-5p, miR-3964, miR-2285t, miR-154-3p, miR-2285u, miR-211-5p, miR-144-5p, let-7d-5p, miR-3596, miR-2483-3p, miR-335-3p, miR-668-5p, let-7c-3p, let-7a-5p, miR-494-3p, miR-382-3p, miR-106a-5p, miR-8485, miR-505, miR-106b-5p, miR-182-5p, miR-199a-3p, let-7e, miR-2459, miR-142-3p, miR-3962, miR-2284r, miR-450b-5p, miR-590-3p, let-7b, let-7b-5p, miR-224-5p, miR-346, miR-324-3p, miR-3604, let-7f, miR-208b-5p, miR-6516-3p, miR-155-5p, miR-21-3p, miR-154a-3p, miR-216b-3p, miR-182-5p, let-7i-5p, miR-155-5p, miR-2284s, miR-6516, miR-377-3p, miR-27b-5p, miR-433-3p, miR-299, miR-21a-3p, miR-543-3p, let-7g-3p, miR-154b-3p, miR-20a, miR-487a, miR-380-3p, miR-143-3p, miR-421-5p, miR-2285i, miR-142a-3p, miR-500a-5p, novel\_17, miR-30b-3p, miR-1277-5p, miR-3653-3p, let-7k, miR-2284m, miR-106a, miR-98-5p, miR-485-3p, miR-18a-3p, miR-106a, miR-199a-3p, miR-2284h-5p, miR-487a-3p, miR-340-5p, miR-140-3p, miR-188-3p, miR-1061, miR-2300b-3p, miR-142-

miR-137-3p, miR-767, miR-1248, miR-874-3p, miR-3956, miR-125a, miR-99a-3p, miR-2355-5p, miR-2285aa, miR-376c-3p, miR-125b-5p, miR-193a-5p, miR-16-5p, miR-1197-3p, miR-1260b, miR-885-3p, miR-429-3p, miR-322-5p, miR-505-5p, miR-125a-3p, miR-664-3p, miR-205-5p, miR-127-5p, let-7f-5p, miR-200a-3p, miR-2285b, miR-3956-5p, let-7g, miR-3065-5p, miR-1306, miR-412-3p, miR-410-5p, miR-378f, let-7e-5p, miR-146b-5p, novel\_68, novel\_69, miR-320c, novel\_87, miR-29a, miR-29c-3p, miR-199b-5p, miR-223-3p, miR-708-3p, miR-432, miR-19b-2-5p, miR-16b, miR-188-5p, miR-27b-3p, miR-497-5p, miR-31-5p, miR-134-3p, miR-343l, miR-149-5p, miR-411-5p, miR-146a, miR-296-3p, miR-194a, novel\_51, miR-2411-3p, miR-2284l, miR-411, miR-885-3p, miR-625-5p, miR-548o-3p, miR-30c-1-3p, miR-296-3p, miR-216b-3p, miR-376e-3p, let-7i-5p, miR-15b-5p, miR-30e-3p, let-7f, miR-2285j, miR-664a-5p, miR-151-3p, miR-30a-3p, miR-669a-3p, let-7b, miR-214, miR-3958-5p, miR-346, miR-6525, miR-769-5p, miR-1961, miR-378i, miR-378a-3p, miR-217-5p, miR-142-3p, miR-493-3p, miR-30d-3p, miR-210-5p, miR-345-3p, miR-422a, miR-92a-1-5p, miR-324-3p, miR-98-5p, miR-99a-3p, miR-202-5p, let-7k, miR-2285w, miR-376c-3p, miR-376a-5p, miR-486-3p, miR-221, miR-136-5p, miR-1983, miR-335-3p, miR-2285u, miR-378g, novel\_82, miR-3964, miR-6527, miR-2284r, miR-1388-5p, miR-1839-5p, miR-1343-3p, miR-145b, miR-1298-3p, miR-16b, miR-29b-1-5p, miR-487b-5p, miR-214-3p, miR-199b-5p, miR-146b, miR-127-3p, miR-1388-3p, miR-378d, miR-2310, miR-320a, miR-362-5p, novel\_91, miR-10b-3p, miR-1814c, miR-3074-1-3p, miR-141-3p, miR-370-3p, miR-769, miR-199a-5p, miR-99b-3p, miR-370-5p, miR-29b-3p, miR-767-5p, miR-374b-3p, miR-486b-3p, miR-1306-5p, miR-374a-3p, miR-378c, miR-145-3p, miR-345-3p, miR-29d-3p, let-7d, miR-582-3p, miR-200b-3p, miR-222, miR-7641, miR-196a-2-3p, miR-

miR-181c-3p, miR-145-3p, miR-1306-5p, miR-193a-5p, miR-204-5p, miR-28-5p, miR-592, miR-2332, miR-135a-1-3p, miR-34c-5p, miR-769, miR-199a-5p, miR-376c-3p, miR-2355-5p, miR-370-3p, miR-876-3p, miR-671-5p, miR-1248, miR-488-3p, miR-3154, let-7g, miR-199a-5p, miR-29a-5p, let-7f-5p, miR-125a-3p, let-7c-5p, miR-9-5p, let-7d, miR-155-5p, miR-10a-5p, miR-1290, miR-211, miR-449a, novel\_27, miR-2428, miR-199b-5p, miR-2284w, miR-22-5p, miR-203b-5p, miR-576-3p, miR-142b, miR-34c, let-7i, novel\_87, miR-34b, novel\_69, miR-7-1-3p, miR-10a-5p, let-7e-5p, miR-3065-5p, miR-378b, miR-296-3p, miR-124-5p, miR-296-3p, miR-432-5p, let-7g-5p, miR-26b-3p, miR-27b-3p, miR-432, miR-1843b-5p, miR-3071-5p, miR-145a-5p, miR-10b-5p, miR-769-5p, let-7b-5p, let-7b, miR-145a-3p, miR-214, miR-664a, miR-155-5p, miR-708-5p, let-7f, miR-338-5p, miR-10a, miR-376e-3p, miR-204-3p, let-7i-5p, miR-155-5p, miR-296-3p, miR-186-5p, novel\_99, miR-1827, miR-376c-3p, miR-130a-5p, miR-143-3p, miR-195a-3p, miR-98-5p, miR-30b-3p, miR-34b-5p, let-7k, novel\_17, miR-500a-5p, miR-383-5p, miR-3600, miR-1b-3p, miR-133a-3p, miR-34a-5p, miR-148a-5p, miR-1961, miR-1246, miR-5703, miR-140-3p, miR-1193, miR-361-3p, miR-877-3p, miR-9-3p, miR-8095, miR-2447, miR-3059-5p, miR-452-5p, miR-9-5p, miR-3958-3p, miR-769-5p, miR-107-5p, miR-7857-3p, miR-2483-3p, miR-203-3p, let-7d-5p, miR-27a-3p, miR-4792, miR-10b, miR-541-5p, miR-211-5p, miR-181a-3p, miR-9-3p, miR-361-3p, miR-199b-5p, miR-378j, miR-574-3p, let-7a-5p, miR-199b-5p, miR-103a-2-5p, let-7e, miR-214-3p, miR-2957, miR-1298-3p, miR-147a, miR-148b-5p, miR-9788-3p, miR-421, novel\_78, miR-145b, miR-27a-3p, miR-1388-5p, miR-6529a, miR-296-5p, miR-1298-5p, miR-10b, miR-125b-2-3p

ANXS1B ENSOARGO( ankyrin : miR-484, miR-330-5p, miR-885-3p, miR-885-3p, miR-7144-5p, miR-744-5p, miR-1827, miR-505-5p, miR-6130, novel\_63, miR-326, miR-760-3p, miR-130b-5p, miR-130b-5p, miR-4510, miR-181a-2-3p, miR-2285r, miR-3184-5p, miR-326-3p, miR-423-5p

SCAF1 ENSOARGO( SR-relat

novel\_87, miR-4324, miR-20a-5p, miR-142b, miR-22-5p, miR-421-5p, miR-6123, miR-6119-3p, miR-128-1-5p, miR-495-3p, miR-2285x, miR-219b-3p, novel\_27, miR-2284w, miR-9851-3p, miR-6516-3p, miR-378f, miR-450b-3p, miR-3120-3p, miR-10a-5p, miR-320c, miR-2404, miR-374c-3p, miR-17-5p, novel\_51, miR-106a-5p, miR-125a-5p, miR-1343-5p, miR-466f-3p, miR-196b-5p, miR-130b-5p, miR-380-5p, miR-493-5p, let-7j, miR-345-5p, let-7a-2-3p, miR-2284l, miR-22-3p, miR-450c-3p, miR-3071-5p, miR-145a-5p, miR-181a-5p, miR-1843b-5p, miR-2113, miR-223-3p, miR-16-1-3p, miR-339-5p, miR-377-5p, miR-3955-5p, miR-122-3p, miR-133b-5p, novel\_116, miR-20b, miR-544b, miR-2355-3p, miR-412-5p, miR-125b-5p, miR-100-3p, miR-99b-3p, miR-494-5p, miR-135a-1-3p, miR-767-5p, novel\_9, miR-193a-5p, miR-3607-3p, miR-1306-5p, miR-378c, miR-93, miR-93-5p, miR-17-5p, miR-3154, miR-320a, miR-2448-3p, miR-301, miR-20b-5p, miR-190a-3p, miR-1814c, miR-876-3p, miR-767, miR-345-5p, miR-2318, let-7g-3p, miR-370-3p, miR-2285aa, miR-99a-3p, miR-1271, miR-125a, miR-574-5p, miR-223-5p, miR-376c-3p, miR-217, miR-339a, novel\_96, miR-181b-5p, miR-3064-5p, miR-30a-3p, miR-181a-2-3p, miR-4286, miR-29a-5p, miR-200a, miR-3065-3p, miR-450c-5p, miR-380-5p, miR-1343-5p, miR-3591-5p, miR-196a-5p, let-7a-2-3p, miR-10a-5p, novel\_79, miR-2285ad, miR-450a-1-3p, novel\_121, miR-2411-5p, miR-378h, miR-2285y, novel\_82, miR-101-3p, miR-2285t, miR-490-5p, miR-4726-5p, miR-499a-5p, miR-450a-5p, miR-181d-5p, miR-452-5p, miR-3059-5p, novel\_60, miR-3956-3p, miR-8095, miR-7705, miR-219a-2-3p, miR-361-3p, miR-129b-5p, miR-140-5p, miR-493-5p, miR-9-3p, miR-136-5p, miR-499b-5p, miR-541-5p, miR-126b-5p, miR-3064-5p, miR-139-5p, miR-4792, miR-20a-3p, miR-499a-3p, miR-7857-3p, miR-378e, miR-2483-3p, miR-106b-5p, miR-320b, miR-1185-5p, miR-3085-3p, miR-491-5p, miR-487b-5p, miR-3955-3p, miR-33a-

miR-3064-5p, miR-499b-5p, miR-378g, miR-27a-3p, miR-4443, miR-376d, miR-361-3p, miR-221, miR-136-5p, miR-376a-3p, novel\_60, miR-3956-3p, miR-541-3p, miR-212-3p, miR-361-3p, miR-7705, novel\_82, miR-101-3p, miR-371a-5p, miR-2285y, miR-4726-5p, miR-499a-5p, miR-490-5p, miR-1343-3p, novel\_4, miR-5010-3p, miR-27a-3p, miR-145b, miR-147a, miR-376b-3p, miR-221-3p, miR-2284r, miR-296-5p, miR-541, miR-412-3p, miR-30b-3p, miR-2426, miR-101c, miR-3120-5p, miR-106a-5p, miR-424-5p, miR-101b-3p, miR-4532, miR-5126, miR-106b-5p, miR-16b, miR-3085-3p, miR-491-5p, miR-3955-3p, miR-381-5p, miR-296-3p, miR-132-5p, miR-377-3p, miR-15b-5p, miR-450a-1-3p, miR-129b-3p, miR-433-3p, miR-1827, miR-3074-5p, miR-6134, miR-222-3p, miR-665, miR-320e, miR-450b-3p, miR-664a, miR-708-5p, miR-208b-5p, miR-4492, miR-424-5p, miR-18a-3p, miR-106a, miR-3600, miR-212-5p, miR-210-3p, miR-383-5p, miR-95-3p, miR-200b, miR-15a-5p, miR-2284h-5p, miR-328-3p, miR-2300b-3p, miR-2904, miR-1197-5p, miR-34a-5p, miR-503-5p, miR-2285w, miR-20a, miR-345-3p, miR-486-3p, miR-196a-3p, miR-125b, miR-185-3p, miR-92a-1-5p, miR-106a, miR-466i-5p, miR-760-3p, miR-34b-5p, miR-3074-5p, miR-320b, miR-34b, novel\_69, miR-18a-3p, miR-376b-3p, miR-107, miR-9851-3p, miR-6395, miR-195a-5p, miR-135b-5p, miR-2285x, miR-1307-3p, miR-449a, miR-2428, miR-502-5p, miR-15a, miR-6402, miR-20a-5p, miR-576-3p, miR-16a, miR-34c, miR-382-5p, miR-103a-3p, miR-432-5p, miR-503-5p, miR-134-3p, miR-185-5p, miR-20b, miR-103, miR-432, miR-873a-5p, miR-1843b-5p, miR-450c-3p, miR-145a-5p, miR-3071-5p, miR-30b-3p, miR-138, miR-16b, miR-381-5p, miR-219a-1-3p, miR-497-5p, miR-4508, miR-27b-3p, miR-455-5p, miR-2284x, miR-2889, miR-382, miR-363-5p, miR-668-3p, miR-432-3p, miR-503-5p, miR-377-3p, miR-106a-5p, miR-17-5p, miR-455-5p, miR-125a-5p, miR-1343-5p, miR-574-5p, miR-3068-



miR-3120-3p, miR-655-5p, miR-329-5p, novel\_68, miR-653b, miR-299b-3p, miR-374c-3p, miR-216a-3p, miR-378b, miR-376a-2-5p, miR-505-3p, miR-2319a, miR-19a-3p, miR-410-5p, miR-1193, miR-1a-1-5p, miR-301b-3p, miR-199b-5p, novel\_27, miR-24-3p, miR-142b, miR-576-3p, miR-147-5p, miR-203b-5p, miR-206, novel\_1, miR-130a-3p, miR-665, miR-31-5p, miR-194-3p, miR-149-5p, miR-3431, miR-134-3p, miR-185-5p, miR-374b-3p, novel\_23, miR-1434-3p, miR-181a-5p, miR-653, miR-4508, miR-380-3p, miR-345-5p, miR-2285r, miR-654-3p, miR-17-5p, miR-106a-5p, miR-2411-3p, miR-32, miR-197-5p, miR-105-5p, miR-466f-3p, miR-2285aa, miR-223-5p, miR-199a-5p, miR-365a-3p, miR-3965, miR-25-3p, miR-3154, miR-23b, miR-17-5p, miR-1248, miR-671-5p, miR-7144-5p, miR-345-5p, miR-10b-3p, miR-193a-5p, miR-6128, miR-409-3p, miR-494-5p, miR-370-5p, miR-1-5p, miR-134-5p, miR-410-3p, miR-376a-5p, miR-429-3p, miR-299a-3p, miR-2284z, miR-134-5p, miR-2411-5p, miR-505-5p, miR-2427, miR-134, miR-345-3p, miR-105-2, miR-200b-3p, miR-155-5p, miR-128-3p, miR-181a-2-3p, miR-1, miR-3529-3p, miR-490-3p, miR-1957a, miR-200a, miR-199a-5p, miR-200c, miR-1a-2-5p, miR-181b-5p, miR-200c-3p, miR-541-5p, miR-20a-3p, miR-2319b, miR-1185-2-3p, miR-203-3p, miR-378g, miR-381-3p, miR-378j, miR-199b-5p, miR-181d-5p, miR-212-3p, miR-363-3p, miR-2447, miR-8095, miR-371a-5p, miR-101-3p, miR-218-5p, miR-490-5p, miR-105-1, miR-409b, novel\_78, miR-1185-3p, miR-2459, miR-421, miR-9788-3p, miR-1a-3p, miR-7857, miR-143-5p, miR-484, miR-2284r, miR-101c, miR-2284aa, miR-2426, miR-33a-5p, miR-23a-3p, miR-494-3p, miR-106a-5p, miR-2330-5p, miR-1b-5p, miR-8485, miR-106b-5p, miR-182-5p, miR-199b-5p, miR-130b-3p, miR-182-5p, miR-532-5p, miR-370-5p, miR-548o-3p, miR-32-5p, miR-155-5p, miR-204-3p, miR-656-3p, miR-301a-3p, miR-2284c, miR-27a-5p, miR-132-3p, miR-21a-3p, miR-186-5p, miR-let-7c-5p, let-7f-5p, miR-760-3p, miR-98-5p, let-7k, miR-543-5p, miR-28b, miR-181b-1-3p, miR-125b-2-3p, miR-199a-5p, let-7g, miR-134, miR-1961, let-7d, miR-10a-5p, miR-7859, miR-322-5p, miR-505-5p, miR-15a-5p, miR-134-5p, miR-2433, let-7f, miR-370-5p, miR-665, miR-320e, miR-664a, miR-874-5p, miR-708-5p, miR-424-5p, miR-28-5p, miR-134-5p, let-7b, miR-16-5p, miR-214, miR-10b-5p, miR-6525, miR-224-5p, let-7b-5p, miR-129b-3p, miR-27b-5p, miR-3154, miR-1827, miR-2331-3p, miR-545-3p, miR-2355-5p, miR-2285aa, miR-370-3p, miR-370-5p, miR-1271, miR-499b-3p, miR-10a, miR-199a-5p, miR-204-3p, miR-15b-5p, miR-877-5p, let-7i-5p, miR-224-5p, miR-5126, miR-3141, miR-197-5p, miR-16b, miR-1185-5p, novel\_124, miR-199b-5p, let-7e, miR-214-3p, let-7a-5p, miR-1388-3p, miR-424-5p, miR-668-3p, miR-654-3p, miR-2284r, miR-484, miR-296-5p, miR-10b, miR-16b, miR-2426, miR-497-5p, miR-187-3p, miR-2300a-5p, miR-199b-3p, miR-181b-2-3p, let-7g-5p, miR-134-3p, miR-3431, miR-9788-3p, miR-455-3p, miR-15a, miR-6529b, miR-28c, miR-16a, let-7i, miR-203b-5p, miR-2285t, miR-199c, miR-6123, miR-2447, novel\_60, miR-3956-3p, miR-1193, miR-24-3p, miR-199b-5p, miR-2428, miR-361-3p, miR-199b-5p, miR-2387, miR-3141, miR-1291, miR-147-3p, let-7e-5p, miR-195a-5p, miR-4792, miR-10a-5p, miR-499a-3p, miR-378g, miR-411b-3p, novel\_69, let-7d-5p, miR-6535, miR-677, miR-181b-3p

miR-18a-3p, miR-505-3p, miR-758-5p, miR-2366, miR-345-3p, miR-615-3p, miR-3591-5p, miR-1197-5p, miR-188-3p, miR-124-3p, miR-4429, miR-10a-5p, miR-216c-5p, miR-219-3p, novel\_17, miR-125b, miR-345-3p, miR-466i-5p, miR-127-5p, miR-450a-2-3p, miR-17-3p, miR-2898, miR-320d, miR-2484, novel\_127, miR-21-3p, miR-140-5p, miR-504-5p, miR-574-5p, miR-125a, miR-370-5p, miR-216b-3p, miR-499b-3p, miR-544-3p, miR-10a, miR-377-3p, miR-204-3p, novel\_32, miR-21a-3p, miR-320a, miR-186-5p, miR-671-5p, miR-214, miR-665-5p, miR-425-5p, miR-6525, miR-323-3p, miR-10b-5p, miR-370-5p, miR-410-5p, miR-2285j, miR-665, miR-664a-5p, miR-125b-5p, miR-219b-3p, miR-664a, miR-6516-3p, miR-17-3p, miR-874-5p, miR-340-3p, miR-26b-3p, miR-2459, miR-149-5p, miR-455-3p, miR-10b, miR-323b, miR-544a, miR-450b-5p, miR-188-5p, miR-744-5p, miR-455-5p, miR-124a, miR-628-5p, miR-363-5p, miR-8485, miR-1306-5p, miR-377-3p, novel\_115, miR-320b, novel\_51, miR-455-5p, miR-2411-3p, miR-323b-3p, miR-124-5p, miR-214-3p, miR-103a-2-5p, miR-125a-5p, miR-106b-3p, miR-10a-5p, miR-499a-3p, miR-4443, miR-320c, miR-18a-3p, miR-3065-5p, miR-1306, miR-504, miR-147-3p, miR-6516-3p, novel\_94, miR-505-3p, miR-2447, miR-1193, miR-17-3p, miR-877-3p, miR-219a-2-3p, miR-615, miR-142b, miR-502-5p, novel\_82, miR-107-5p, miR-4726-5p, miR-22-5p, miR-1843a-3p, miR-1b-5p, miR-8485, miR-193a, miR-124a, miR-23a-3p, miR-487b-5p, miR-326, miR-320b, miR-342, miR-505, miR-323b-3p, miR-147a, miR-142-3p, miR-539-5p, miR-2285e, miR-148b-5p, miR-500-5p, miR-409b, miR-105-1, miR-2300a-5p, miR-330-3p, miR-145b, miR-5010-3p, miR-2426, miR-450b-5p, miR-101a-5p, miR-101c, miR-30b-3p, miR-323b, miR-1a-3p, miR-412-3p, miR-362-5p, miR-877-3p, miR-1285-5p, miR-3059-5p, miR-190b-5p, miR-2284j, miR-9-5p, miR-2285f, miR-499a-5p, miR-628-3p, miR-374a-3p, miR-3082-5p, miR-7857-3p, miR-25, miR-2319b, miR-2284g, miR-2285u, miR-499b-5p, miR-668-5p, miR-1983, miR-493-5p, miR-140-5p, miR-378j, miR-142a-3p, miR-143-3p, miR-2411, miR-2285w, miR-345-3p, miR-195a-3p, miR-320d, miR-2284m, miR-221-5p, miR-1277-5p, miR-618, miR-26a-5p, miR-185-3p, miR-500a-5p, miR-216a-5p, miR-23c, miR-7859, miR-23b-3p, miR-2284h-5p, miR-548e-3p, miR-18a-3p, novel\_73, miR-4429, miR-33b-3p, miR-2284u, miR-664-5p, novel\_133, miR-1197-5p, miR-1434-5p, miR-1193, miR-124-3p, miR-346, miR-224-5p, miR-206-3p, miR-6134, miR-145a-3p, miR-3184-3p, miR-4510, miR-2330-3p, miR-3958-5p, miR-6516-3p, miR-487b-5p, miR-664a, miR-155-5p, miR-450b-3p, miR-190a-5p, miR-500, miR-4492, miR-129-5p, miR-2285j, miR-3604, miR-338-5p, miR-6130, miR-877-5p, miR-548o-3p, miR-140-5p, miR-221-5p, miR-532-5p, miR-216b-3p, miR-21-3p, miR-2312, miR-625-5p, miR-2285c, miR-450a-1-3p, miR-433-3p, miR-487b-5p, miR-500a-3p, miR-2285r, miR-6240, miR-493-5p, miR-101-5p, miR-124-5p, miR-483-3p, miR-378a-5p, miR-466f-3p, miR-224-5p, miR-190a, miR-105-5p, miR-330-3p, miR-412-5p, miR-2285g, miR-2284d, miR-133b-5p, miR-138, miR-30b-3p, miR-2284ab, miR-26a-2-3p, miR-1434-3p, miR-1285, miR-2113, miR-873a-5p, miR-145a-5p, miR-450c-3p, miR-3959-3p, miR-326-3p, novel\_27, miR-342-3p, novel\_120, miR-206, miR-6119-3p, miR-576-3p, miR-142b, miR-

PUS1 ENSOARGO(pseudour)

TBX18 ENSOARGO(T-box) 18

miR-54b-5p, miR-322-5p, miR-24-2-5p, miR-758-5p, miR-6517, miR-10a-5p, miR-300, miR-345-3p, miR-3591-5p, miR-1957a, novel\_39, miR-490-3p, miR-29b-2-5p, miR-4286, miR-107, miR-450a-2-3p, miR-181b-5p, miR-30c-2-3p, miR-2285af, miR-205-5p, miR-664-3p, miR-133c, miR-2284n, miR-376c-3p, miR-331-5p, miR-34c-5p, miR-365a-3p, novel\_48, miR-3074-1-3p, miR-1814c, miR-345-5p, miR-320a, miR-3154, miR-381-3p, miR-503-3p, miR-301, miR-16-5p, miR-204-5p, novel\_63, miR-494-5p, miR-2332, miR-103, miR-340-3p, miR-103a-3p, miR-497-5p, miR-188-5p, miR-380-3p, miR-30b-3p, miR-16b, miR-145a-5p, miR-1434-3p, miR-542-3p, miR-345-5p, miR-432-3p, miR-2285r, miR-432-3p, let-7f-2-3p, let-7f-2-3p, miR-2411-3p, miR-320c, miR-677, miR-181b-3p, miR-34b, miR-10a-5p, miR-216b-3p, miR-505-3p, miR-195a-5p, miR-376a-2-5p, miR-19a-3p, miR-107, miR-3591-3p, miR-449a, novel\_27, miR-2428, miR-211, miR-323c, miR-3957-3p, miR-495-3p, novel\_101, miR-22-5p, miR-6119-3p, novel\_1, miR-34c, miR-16a, miR-502-5p, miR-15a, miR-6402, miR-142b, miR-2284h-5p, miR-7859, miR-15a-5p, miR-212-5p, miR-505-3p, miR-361-5p, miR-34a-5p, miR-19b-3p, miR-33b-3p, miR-4429, miR-5703, miR-193b-5p, miR-143-3p, miR-380-3p, miR-29b-1-5p, miR-376c-3p, miR-181b-1-3p, miR-125b-2-3p, miR-130a-5p, miR-2285w, miR-221-5p, miR-34b-5p, miR-1277-5p, miR-320d, miR-219b-5p, miR-216a-5p, miR-185-3p, miR-345-3p, miR-2285p, miR-618, miR-15b-5p, miR-10a, miR-376e-3p, miR-21-3p, miR-216b-3p, miR-552-3p, miR-140-5p, miR-30c-1-3p, miR-221-5p, miR-548o-3p, miR-345-5p, miR-655, miR-487b-5p, miR-299, miR-10b-5p, miR-539-5p, miR-4492, miR-487a-5p, miR-424-5p, novel\_74, miR-487b-5p, miR-6516-3p, miR-664a, miR-338-5p, miR-665, miR-29b-2-5p, miR-655-3p, miR-455-3p, miR-1185-3p, miR-153, miR-539-5p, miR-145b, miR-181b-2-3p, novel\_78, miR-299a-5p, miR-30b-3p, miR-10b, miR-301b-

miR-466i-5p, miR-299-3p, miR-2484, miR-26a-5p, miR-2285p, miR-125b, miR-345-3p, miR-324-3p, miR-216c-5p, miR-195a-3p, novel\_73, miR-184-3p, miR-33b-3p, miR-148a-5p, miR-378d, miR-16-1-3p, miR-218-1-3p, miR-1246, miR-1193, miR-148b-3p, miR-23c, miR-222-5p, miR-23b-3p, miR-1247-5p, miR-199a-3p, miR-616-3p, miR-505-3p, miR-212-5p, miR-487b-5p, novel\_74, miR-454-3p, miR-708-5p, miR-665, miR-219b-3p, miR-181c-5p, miR-145a-3p, miR-3074-5p, let-7g-3p, miR-625-5p, miR-2285c, miR-411, miR-433-3p, miR-193b-3p, miR-301a-3p, miR-496-3p, miR-32-3p, miR-296-3p, miR-182-5p, miR-216b-3p, miR-130b-3p, miR-487b-5p, miR-199b-5p, miR-431-5p, novel\_103, miR-342, miR-199a-3p, miR-182-5p, miR-2310, miR-3187-3p, miR-382-3p, miR-127-3p, miR-574-3p, miR-2284b, miR-23a-3p, miR-101a-5p, miR-2284aa, miR-143-5p, miR-484, miR-30b-3p, miR-125b-2-3p, miR-7857, miR-147a, miR-1298-3p, miR-421, miR-2285e, miR-500-5p, miR-216a-3p, miR-148b-5p, miR-330-3p, miR-199b-3p, miR-548w, miR-27a-3p, miR-222-5p, miR-2285n, miR-218-5p, miR-2285y, miR-1973, miR-362-5p, miR-219a-2-3p, miR-212-3p, miR-32-3p, miR-181d-5p, miR-9-5p, miR-2285f, miR-668-5p, miR-3963, miR-544-5p, miR-199b-5p, miR-140-5p, miR-129b-5p, miR-2483-3p, miR-27a-3p, miR-203-3p, miR-2319b, miR-452-3p, miR-499b-5p, miR-181b-5p, miR-152-3p, miR-200a-3p, miR-219-3p, miR-2285af, miR-30f, miR-28b, miR-148b-5p, miR-2285b, miR-2284a, miR-2284y, miR-199a-5p, miR-2385-3p, miR-495-5p, miR-582-3p, miR-300, miR-496, miR-128-3p, miR-1290, miR-3591-5p, miR-345-3p, miR-2427, miR-1343-5p, miR-505-5p, miR-9-5p, miR-302a-5p, novel\_121, miR-2284z, miR-582-3p, miR-545-5p, miR-2285ad, miR-299a-3p, miR-431, miR-331-5p, miR-191-5p, miR-28-5p, miR-31-3p, miR-5100, miR-144, miR-6740-5p, miR-125b-5p, miR-500b-5p, miR-365a-5p, miR-1306-5p, miR-3607-3p, miR-10b-3p, miR-1814c, miR-1248, miR-331-5p, miR-652-5p, miR-668-3p, miR-2330-5p, miR-1839-3p, miR-432-3p, miR-432-3p, miR-182-5p, miR-582, miR-214-3p, miR-1468, miR-1343-5p, miR-483-3p, miR-181b-2-3p, novel\_78, miR-3955-5p, miR-2459, miR-148b-5p, miR-134-3p, miR-3431, miR-3535, miR-30b-3p, novel\_23, miR-4791, miR-541, miR-6529a, miR-26a-2-3p, miR-544a, miR-450b-5p, miR-30b-3p, miR-6527, miR-1839-3p, miR-2285f, miR-335-5p, miR-541-3p, miR-449a, miR-34c, miR-2440, miR-133a-5p, miR-147-5p, novel\_1, miR-335, miR-181b-3p, miR-677, miR-203-3p, miR-34b, miR-146b-3p, miR-3596, miR-378g, miR-3591-3p, miR-150-5p, miR-376b-5p, miR-2285ab, miR-9851-3p, miR-3529-3p, miR-216c-5p, miR-200a, miR-29a-5p, miR-181b-1-3p, miR-500a-5p, miR-196a-3p, miR-30d, miR-34b-5p, miR-2284z, miR-6516-5p, miR-483-3p, miR-30a-5p, miR-5703, miR-1343-5p, novel\_133, miR-34a-5p, miR-148a-5p, miR-142-3p, miR-582-3p, miR-214, miR-664a-5p, miR-1468-5p, miR-4492, miR-182-5p, miR-370-3p, miR-21-3p, miR-544-3p, miR-6516, miR-34c-5p, miR-30d-5p, miR-30e-5p, miR-329b, miR-2312

novel\_11b, miR-1306-5p, miR-342, miR-320b, miR-542-5p, miR-424-5p, miR-33a-5p, miR-4532, miR-10b, miR-125b-2-3p, novel\_4, miR-5010-3p, miR-9788-3p, miR-216a-3p, miR-2285n, miR-769-5p, miR-2285y, miR-371a-5p, miR-2285t, miR-3059-5p, miR-219a-5p, miR-452-5p, miR-219a-2-3p, novel\_94, miR-20a-3p, miR-7977, miR-3082-5p, miR-7857-3p, miR-542-5p, miR-125b, miR-320d, miR-299-3p, miR-221-5p, miR-130a-5p, miR-125b-2-3p, miR-146a-5p, miR-2411, miR-2300b-3p, novel\_133, miR-1197-5p, miR-140-3p, miR-124-3p, miR-2904, miR-19b-3p, miR-4429, miR-378d, miR-3600, miR-1b-3p, miR-15a-5p, miR-532-3p, miR-29b-2-5p, miR-424-5p, miR-145a-3p, miR-4510, miR-3074-2-3p, miR-10b-5p, miR-18a-5p, miR-140-5p, miR-221-5p, miR-182-5p, miR-3065-3p, miR-323-5p, miR-6130, miR-139-5p, miR-877-5p, novel\_32, miR-204-3p, miR-1343-5p, miR-125a-5p, miR-382, miR-653, miR-1260b, miR-2284ab, miR-7862, miR-130a-3p, miR-103, miR-15a, miR-33a-3p, miR-16a, miR-656-5p, novel\_120, miR-342-3p, miR-135a-2-3p, miR-542-5p, novel\_101, miR-495-3p, miR-24-3p, miR-371b-3p, miR-2428, novel\_27, miR-18b, miR-2387, miR-378b, miR-19a-3p, miR-107, miR-379-5p, miR-195a-5p, miR-9851-3p, miR-10a-5p, miR-323a-5p, miR-146b-3p, miR-2397-5p, miR-1260a, miR-181c-3p, miR-217, miR-191-3p, miR-450a-2-3p, miR-107, miR-4286, miR-30a-3p, miR-1, miR-29b-2-5p, miR-2385-3p, miR-2478, miR-24-2-5p, miR-2284a, miR-1271-3p, miR-3065-3p, miR-10a-5p, miR-128-3p, miR-2411-5p, miR-214-5p, miR-135a-1-3p, miR-409-3p, miR-31-3p, miR-1306-5p, miR-103b, miR-488-3p, miR-18a, miR-320a, miR-3154, miR-10b-3p, miR-7144-5p, miR-598-3p, miR-769, miR-3965, miR-154b-5p, miR-431-5p, miR-16b, miR-182-5p, miR-505, novel\_19, miR-487b-5p, miR-130b-3p, miR-214-3p, miR-146b, miR-101b-3p, miR-124a, miR-2284b, miR-676-3p, miR-23a-3p, miR-2284c, miR-758-3p, miR-1a-3p, miR-

miR-497-5p, miR-2284x, miR-29b, miR-138, miR-16b, miR-145a-5p, miR-542-3p, miR-181a-5p, miR-149-5p, miR-20b, miR-103, miR-134-3p, miR-26b-3p, miR-3955-5p, miR-103a-3p, miR-133b-5p, miR-1343-5p, miR-466f-3p, miR-124-5p, miR-106a-5p, miR-17-5p, miR-377-3p, miR-296-3p, miR-296-3p, miR-345-5p, miR-654-3p, miR-432-3p, miR-130b-5p, miR-2319a, miR-6516-3p, miR-195a-5p, miR-378f, miR-410-5p, miR-412-3p, miR-107, miR-677, miR-181b-3p, miR-146b-3p, miR-323a-5p, miR-299b-3p, miR-29a-3p, novel\_68, miR-378b, miR-216b-3p, miR-3074-5p, miR-656-5p, miR-379-3p, miR-29a, miR-16a, miR-502-5p, miR-15a, miR-20a-5p, miR-326-3p, miR-2428, miR-24-3p, miR-1839-3p, miR-29c-3p, miR-219b-3p, miR-335-5p, miR-136-3p, miR-411-3p, miR-2427, miR-29d-3p, miR-1343-5p, miR-330-5p, miR-322-5p, miR-378h, miR-1271-5p, miR-1224-5p, miR-299a-3p, miR-429-3p, miR-107, miR-200a-3p, miR-543-5p, miR-450a-2-3p, miR-181b-5p, miR-6536, miR-200c-3p, miR-8117, miR-200c, miR-3065-3p, miR-29a-5p, miR-490-3p, miR-450b-5p, miR-3064-5p, miR-30a-3p, miR-7144-5p, miR-20b-5p, miR-23a-5p, miR-1248, miR-876-3p, miR-345-5p, miR-2318, miR-329a, miR-93-5p, miR-3154, miR-17-5p, miR-301, miR-324-5p, miR-154b-5p, miR-769, miR-370-3p, miR-141-3p, miR-3068-3p, miR-138-5p, miR-331-3p, miR-29b-3p, miR-378c, miR-93, miR-1197-3p, miR-16-5p, miR-3607-3p, miR-133a-3p, miR-362-3p, miR-1388-5p, miR-378c, miR-758-3p, miR-378b, miR-329-3p, miR-484, miR-301b-5p, miR-455-3p, miR-2459, miR-147a, miR-181b-2-3p, miR-145b, miR-1343-3p, novel\_78, novel\_4, miR-3085-3p, miR-362-3p, miR-505, miR-106b-5p, miR-16b, miR-199a-3p, miR-326, novel\_103, miR-758-3p, miR-378d, miR-33a-5p, miR-1388-3p, miR-1839-3p, miR-424-5p, miR-106a-5p, miR-335-3p, miR-1983, miR-96-5p, miR-129b-5p, miR-378e, miR-25, miR-378g, miR-489, miR-126b-5p, miR-7977, miR-3064-5p, miR-1792, miR-152-3p, miR-10b, miR-20a-

miR-758-3p, miR-541, miR-301b-5p, miR-329-3p, miR-2459, miR-147a, miR-142-5p, miR-145b, miR-181b-2-3p, novel\_78, miR-1343-3p, miR-491-5p, miR-106b-5p, miR-1388-3p, miR-124a, miR-1983, miR-504, miR-378g, miR-2285u, miR-4792, miR-301a-5p, miR-2440, miR-615, miR-218-5p, novel\_82, miR-423-5p, miR-877-3p, miR-361-3p, miR-3956-3p, miR-2447, miR-34a-5p, miR-493-3p, miR-212-5p, miR-106a, miR-18a-3p, miR-345-3p, miR-500a-5p, miR-324-3p, miR-210-5p, novel\_17, miR-486-3p, miR-181b-1-3p, miR-345-3p, miR-1895, miR-345-5p, miR-339b, miR-129b-3p, miR-450a-1-3p, miR-10a, miR-2331-3p, miR-504-5p, miR-130b-5p, miR-4492, miR-1468-5p, miR-874-5p, miR-664a-5p, miR-665, miR-2285j, miR-3184-5p, novel\_44, miR-142a-5p, miR-6525, miR-665-5p, miR-3074-5p, miR-433-5p, miR-4508, miR-450c-3p, miR-7b-5p, miR-149-5p, miR-194-3p, miR-134-3p, miR-3431, miR-339-5p, miR-103a-3p, miR-31-5p, miR-340-3p, miR-378a-5p, novel\_51, miR-2411-3p, miR-365b-5p, miR-7-5p, let-7a-2-3p, miR-432-3p, miR-628-5p, miR-412-3p, miR-2284e, miR-216a-3p, miR-1306, miR-181b-3p, miR-669, miR-677, miR-3074-5p, novel\_68, miR-6123, miR-485-3p, miR-28c, miR-330-5p, miR-2427, miR-1343-5p, miR-1290, miR-486-5p, miR-450a-1-3p, novel\_79, miR-429-3p, novel\_96, novel\_127, miR-205-5p, novel\_39, miR-29a-5p, miR-450b-5p, miR-3064-5p, miR-20b-5p, miR-329b, miR-345-5p, miR-329a, miR-2474, miR-767, miR-93-5p, miR-125a, miR-1271, miR-2355-5p, miR-874-3p, miR-574-5p, miR-6740-5p, miR-125b-5p, miR-2433, miR-1260b, miR-193a-5p, novel\_42, miR-30b-3p, miR-10b, miR-484, miR-296-5p, miR-9788-3p, miR-2300a-5p, miR-2285o, miR-1468, miR-3955-3p, novel\_124, miR-3085-3p, miR-1306-5p, miR-326, miR-342, miR-758-3p, miR-4532, miR-2330-5p, miR-106a-5p, miR-877-3p, miR-361-3p, miR-10b, miR-3064-5p, miR-7134-3p, miR-4726-5p, miR-2285n, miR-452-5p, miR-212-3p, miR-541-3p, novel\_60, miR-3059-





miR-450b-5p, miR-148b-5p, miR-2285b, miR-3956-5p, novel\_39, miR-3064-5p, miR-127-5p, miR-6536, miR-28-3p, novel\_127, miR-200a-3p, miR-8117, miR-125a-3p, miR-322-5p, miR-9-5p, miR-486-5p, miR-129-1-3p, miR-134-5p, miR-429-3p, miR-299a-3p, miR-412, miR-30c, miR-1290, miR-181c-3p, novel\_42, miR-16-5p, miR-592, miR-134-5p, miR-100-3p, miR-125b-5p, miR-503-3p, miR-125a, miR-1271, miR-345-5p, miR-876-3p, miR-424-3p, miR-30e-5p, miR-432-3p, miR-432-3p, miR-377-3p, novel\_51, miR-365b-5p, miR-3141, miR-134-3p, miR-3431, miR-149-5p, novel\_116, miR-194-3p, miR-16-1-3p, miR-16b, miR-2284x, miR-497-5p, miR-1843b-5p, miR-542-3p, miR-432, miR-576-3p, miR-142b, miR-4324, miR-299b-3p, miR-374c-3p, miR-181b-3p, miR-677, miR-320c, miR-669, miR-329-5p, miR-216b-3p, miR-378f, miR-3141, miR-3591-3p, miR-216a-3p, miR-150-5p, miR-181b-1-3p, miR-2424, miR-486-3p, miR-329a-5p, miR-2285p, miR-30b, miR-92a-1-5p, miR-422a, miR-500a-5p, miR-324-3p, miR-210-3p, miR-328-3p, miR-18a-3p, miR-212-5p, miR-33b-3p, miR-16-1-3p, miR-218-1-3p, miR-193b-5p, miR-30c-5p, miR-378i, miR-378a-3p, novel\_44, miR-224-5p, miR-3184-5p, miR-129-2-3p, miR-214, miR-487b-5p, novel\_74, miR-130b-5p, miR-665, miR-582-5p, miR-377-3p, miR-15b-5p, miR-30c-1-3p, miR-2331-3p, miR-504-5p, miR-552-3p, miR-296-3p, miR-345-5p, miR-30d-5p, miR-378d, miR-2310, miR-1b-5p, miR-1388-3p, miR-103a-2-5p, miR-214-3p, miR-16b, miR-29b-1-5p, miR-147a, miR-425-3p, miR-2459, miR-126a-5p, miR-455-3p, miR-548w, novel\_78, miR-181b-2-3p, miR-101c, miR-541, novel\_111, miR-361-3p, miR-423-5p, miR-2447, miR-9-5p, miR-1843a-3p, miR-3964, novel\_82, miR-378g, miR-139-5p, miR-504, miR-181a-3p, miR-96-5p, miR-378j, miR-1271-3p, miR-3065-3p, miR-2403, miR-29b-2-5p, miR-200c-3p, miR-17-3p, miR-2898, miR-200c, miR-6119-5p, miR-30c-2-3p, miR-378h, miR-2411-5p, miR-1271-5p, miR-24-2-5p, miR-

miR-1271-5p, miR-378h, novel\_121, miR-450a-1-3p, miR-6517, miR-431, novel\_79, miR-496, miR-105-2, miR-345-3p, miR-218-2-3p, miR-450b-5p, miR-380-5p, miR-376c-5p, miR-376b-5p, miR-29a-5p, miR-4286, miR-181a-2-3p, miR-17-3p, miR-2898, novel\_127, novel\_96, miR-219-3p, miR-125a-3p, miR-2285af, miR-205-5p, miR-339a, miR-217, miR-30c-2-3p, miR-34c-5p, miR-503-3p, miR-874-3p, miR-3068-3p, miR-125a, miR-215-5p, miR-2355-5p, miR-598-3p, miR-2318, miR-671-5p, miR-485-5p, miR-1248, miR-3074-1-3p, miR-7144-5p, miR-301, miR-2448-3p, miR-3154, miR-1197-3p, miR-378c, miR-103b, miR-370-5p, novel\_63, miR-125b-5p, miR-3431, miR-185-5p, novel\_116, miR-149-5p, miR-377-5p, miR-339-5p, miR-6239, miR-27b-3p, miR-2113, miR-873a-5p, miR-653, miR-708-3p, miR-3071-5p, miR-22-3p, miR-450c-3p, miR-197-3p, miR-432-3p, miR-2285r, miR-380-5p, let-7f-2-3p, let-7f-2-3p, miR-363-5p, miR-124-5p, miR-125a-5p, miR-105-5p, miR-34b, miR-323a-5p, novel\_68, miR-26b-5p, miR-3120-3p, miR-412-3p, miR-1291, miR-378f, miR-2285ab, miR-378b, miR-18a-3p, miR-1306, miR-24-3p, miR-449a, miR-1193, miR-17-3p, miR-3957-3p, miR-22-5p, miR-4324, miR-485-3p, miR-34c, miR-487a-3p, miR-383-5p, miR-18a-3p, miR-485-3p, miR-142-3p, miR-34a-5p, miR-133a-3p, miR-215-5p, miR-378i, novel\_133, miR-217-5p, miR-378a-3p, miR-140-3p, miR-2904, miR-377-5p, miR-143-3p, miR-216c-5p, miR-345-3p, miR-34b-5p, miR-3653-3p, miR-26a-5p, novel\_17, miR-125b, miR-185-3p, miR-422a, miR-345-3p, miR-324-3p, miR-323-5p, miR-6130, miR-216b-5p, miR-192-5p, novel\_32, miR-204-3p, miR-22-3p, miR-496-3p, miR-378a-3p, miR-140-5p, miR-30c-1-3p, miR-2331-3p, miR-370-5p, miR-339b, miR-2312, miR-186-5p, miR-625-5p, miR-450a-1-3p, miR-299, miR-598-3p, miR-500a-3p, miR-6525, miR-6134, miR-4510, miR-590-3p, miR-378c, miR-1271, miR-17-3p, miR-6516-

JMJDS

ENSOARGO(jumonji)

miR-324-5p, miR-223-5p, miR-370-3p, miR-235b-5p, miR-874-3p, miR-574-5p, miR-485-5p, miR-7144-5p, miR-3074-1-3p, miR-345-5p, miR-2474, miR-2448-3p, miR-133a-3p, miR-16-5p, novel\_42, miR-1306-5p, miR-486b-3p, novel\_9, miR-138-5p, miR-331-3p, miR-410-5p, miR-322-5p, miR-412, miR-10a-5p, miR-105-2, miR-582-3p, miR-615-3p, miR-1271-3p, miR-490-3p, miR-380-5p, miR-148b-5p, miR-3064-5p, miR-543-5p, novel\_127, miR-450a-2-3p, miR-125a-3p, miR-205-5p, miR-669, novel\_69, miR-10a-5p, miR-320b, miR-379-5p, miR-195a-5p, miR-146b-5p, miR-450b-3p, miR-18a-3p, miR-2285ab, miR-342-3p, miR-6123, miR-502b, novel\_1, miR-128-1-5p, miR-16a, miR-6529b, miR-15a, miR-149-5p, miR-503-5p, miR-134-3p, miR-31-5p, miR-497-5p, miR-381-5p, miR-138, miR-16b, miR-22-3p, miR-197-3p, miR-1285, miR-873a-5p, miR-345-5p, miR-668-3p, miR-363-5p, miR-2483-5p, miR-106b-3p, novel\_51, miR-105-5p, miR-197-5p, miR-146a, miR-503-5p, miR-877-5p, miR-151b, miR-15b-5p, novel\_32, miR-22-3p, miR-6130, miR-10a, miR-27a-5p, miR-532-5p, miR-216b-3p, miR-504-5p, miR-2331-3p, miR-345-5p, miR-2312, miR-133b-3p, miR-21a-3p, miR-6134, miR-3184-5p, miR-10b-5p, miR-214, miR-665-5p, miR-4510, miR-145a-3p, miR-424-5p, miR-4492, miR-664a, miR-151-5p, miR-15a-5p, miR-210-3p, miR-3600, miR-18a-3p, miR-133a-3p, miR-664-5p, miR-184-3p, miR-124-3p, miR-486-3p, miR-146a-5p, miR-503-5p, miR-2484, miR-466i-5p, miR-324-3p, miR-196a-3p, miR-489, miR-25, miR-378g, miR-7977, miR-499b-5p, miR-20a-3p, miR-10b, miR-4792, miR-3064-5p, novel\_94, miR-504, miR-147-3p, miR-361-3p, miR-423-5p, miR-877-3p, miR-361-3p, miR-2285f, miR-541-3p, miR-3956-3p, novel\_60, miR-615, novel\_82, miR-5010-3p, miR-1343-3p, miR-105-1, novel\_4, miR-1839-5p, miR-125b-2-3p, miR-412-3p, miR-10b, miR-541, miR-296-5p, miR-3187-3p, miR-33a-5p, miR-424-5p, miR-2330-5p, miR-124a, miR-381-5p, miR-214-

miR-62b-5p, miR-339b, miR-34b-5p, miR-30d-5p, miR-129b-3p, let-7i-5p, miR-301a-3p, miR-2284s, miR-377-3p, miR-499b-3p, miR-548o-3p, miR-504-5p, miR-2331-3p, miR-454-3p, miR-874-5p, miR-664a-5p, miR-665, miR-30a-3p, miR-30e-3p, let-7f, miR-122-5p, miR-224-5p, miR-769-5p, miR-214, let-7b, miR-148a-5p, miR-2284u, miR-34a-5p, miR-664-5p, miR-142-3p, miR-493-3p, miR-378a-3p, miR-1961, miR-2366, miR-378i, miR-191, miR-30c-5p, miR-328-3p, miR-7859, miR-30d-3p, miR-18a-3p, let-7k, miR-98-5p, miR-202-5p, miR-422a, miR-92a-1-5p, miR-324-3p, novel\_17, miR-30b, miR-486-3p, miR-664b-3p, miR-345-3p, miR-329a-5p, miR-1983, miR-544-5p, miR-335-3p, miR-504, miR-96-5p, miR-1306-3p, miR-499a-3p, miR-25, miR-211-5p, miR-2284g, miR-2440, miR-877-3p, miR-361-3p, miR-6527, miR-2447, miR-1a-3p, miR-541, miR-2284r, miR-148b-5p, miR-147a, miR-181b-2-3p, miR-199b-3p, miR-214-3p, miR-199b-5p, miR-130b-3p, miR-491-5p, miR-182-5p, miR-505, miR-431-5p, miR-8485, miR-378d, miR-1388-3p, miR-124a, miR-329b, miR-345-5p, miR-30e-5p, miR-1271, miR-125a, miR-2285aa, miR-874-3p, miR-191-5p, miR-134-5p, miR-125b-5p, miR-100-3p, miR-2433, miR-1260b, miR-1197-3p, miR-30c, miR-23b-5p, miR-330-5p, miR-1343-5p, miR-134-5p, miR-2284z, miR-505-5p, miR-431, miR-412, novel\_79, miR-1224-5p, miR-200a-3p, novel\_96, novel\_127, miR-152-3p, let-7f-5p, miR-127-5p, miR-125a-3p, miR-2284y, let-7g, miR-29a-5p, miR-148b-5p, miR-3064-5p, miR-378f, let-7e-5p, miR-2284e, miR-412-3p, miR-3591-3p, miR-1306, miR-150-5p, miR-148a-3p, miR-669, miR-6535, miR-677, miR-411b-3p, miR-3120-3p, miR-329-5p, miR-6123, miR-206, miR-4324, miR-199b-5p, miR-301b-3p, miR-193b-3p, miR-335-5p, miR-4508, miR-197-3p, miR-22-3p, miR-542-3p, miR-7b-5p, miR-19b-2-5p, miR-149-5p, miR-194-3p, miR-3431, miR-339-5p, miR-103a-3p, miR-31-5p, miR-193a-3p, miR-338-5p, miR-140-3p, miR-127-5p, let-7j

CAPN5

ENSOARGO0 calpain

MCTS1

ENSOARGO0 malignan

miR-499b-5p, miR-211-5p, miR-139-5p, miR-3064-5p, miR-329-5p, miR-320c, miR-144-3p, miR-4443, miR-3082-5p, miR-29a-3p, miR-378j, miR-2387, miR-335-3p, miR-758-5p, novel\_101, miR-29c-3p, miR-2285x, miR-17-3p, miR-2447, miR-211, miR-107-5p, miR-2285n, miR-22-5p, miR-502b, miR-29a, miR-26b-3p, novel\_4, novel\_78, miR-122-3p, miR-2459, miR-484, miR-329-3p, miR-29b, miR-362-3p, miR-1388-5p, miR-101a-5p, miR-544a, miR-101b-3p, miR-491-3p, miR-30c-1-3p, miR-362-3p, miR-320b, miR-103a-2-5p, miR-483-3p, miR-3085-3p, miR-378a-5p, miR-3065-3p, miR-370-3p, miR-141-3p, miR-2331-3p, miR-30c-1-3p, miR-221-5p, miR-548o-3p, miR-3068-3p, miR-324-5p, miR-204-3p, miR-154b-5p, miR-544-3p, miR-139-5p, miR-320a, miR-21a-3p, miR-7144-5p, miR-1248, miR-186-5p, miR-10b-3p, miR-133b-3p, miR-329a, miR-329b, miR-133a-3p, miR-3184-3p, miR-144, miR-665, miR-320e, miR-29b-3p, miR-2285j, miR-5100, miR-134-5p, miR-204-5p, miR-17-3p, miR-380-5p, miR-548e-3p, miR-423-3p, miR-134-5p, miR-7859, miR-2411-5p, miR-483-3p, miR-29d-3p, miR-1197-5p, miR-1193, miR-188-3p, miR-5703, miR-126-3p, miR-362-3p, miR-134, miR-133a-3p, miR-218-1-3p, miR-4429, miR-3064-5p, miR-4286, miR-329a-5p, miR-216c-5p, miR-2411, miR-3065-3p, miR-200a, miR-3071-3p, miR-30c-2-3p, miR-196a-3p, miR-8117, miR-125a-3p, miR-221-5p, miR-200a-3p, miR-320d, miR-17-3p, miR-127-5p

miR-664a, miR-190a-5p, miR-4492, miR-454-3p, miR-134-5p, miR-99b-3p, miR-30e-3p, miR-5100, miR-324-3p, miR-30a-3p, miR-409-3p, let-7g-3p, miR-2312, miR-625-5p, miR-485-5p, miR-2285c, miR-320a, miR-301a-3p, novel\_25, miR-22-3p, miR-199a-5p, miR-223-5p, miR-574-5p, miR-2355-5p, miR-216b-3p, miR-99a-3p, miR-296-3p, miR-320d, miR-466i-5p, miR-99a-3p, miR-152-3p, miR-205-5p, miR-8117, miR-210-5p, miR-3601, miR-185-3p, miR-92a-1-5p, miR-2285i, miR-29b-1-5p, miR-199a-5p, miR-30a-3p, miR-4429, miR-128-3p, miR-134, miR-140-3p, miR-148b-3p, miR-483-3p, miR-2284h-5p, miR-134-5p, miR-2285ad, miR-30d-3p, miR-218-5p, novel\_82, miR-2285n, miR-2285y, miR-199b-5p, miR-301b-3p, miR-2285f, miR-190b-5p, miR-2285k, miR-361-3p, miR-2285ab, miR-148a-3p, miR-199b-5p, miR-216a-3p, miR-411b-3p, miR-320c, miR-669, miR-4792, miR-20a-3p, miR-499b-5p, miR-2285u, miR-7-1-3p, miR-483-3p, miR-130b-3p, miR-199b-5p, miR-320b, miR-197-5p, miR-190a, miR-29b-1-5p, miR-2483-5p, let-7c-3p, miR-33a-5p, miR-744-3p, miR-450b-5p, miR-3120-5p, miR-143-5p, miR-4791, miR-22-3p, miR-3535, miR-2285g, novel\_116, miR-2285e, miR-187-3p, miR-130a-3p

miR-1b-3p, miR-433-3p, miR-141-3p, miR-452-3p, miR-200a-3p, miR-758-5p

KCTD20 ENSOARGO(potassium)

ST18 ENSOARGO(suppressor)

SPATA6L ENSOARGO(spermatogenesis)

miR-125b-2-3p, miR-484, miR-143-5p, miR-3120-5p, miR-5010-3p, novel\_78, novel\_4, miR-409b, miR-500-5p, miR-216a-3p, miR-455-3p, miR-2285e, miR-2459, miR-421, miR-153, miR-539-5p, miR-2320-3p, miR-106b-5p, miR-326, miR-153-3p, miR-214-3p, miR-494-3p, miR-101b-3p, miR-106a-5p, miR-8485, miR-1b-5p, miR-2310, miR-361-3p, novel\_94, miR-2285u, miR-499b-5p, miR-7977, miR-452-3p, miR-2483-3p, miR-2440, miR-194b-5p, miR-3059-5p, miR-423-5p, miR-154a, miR-362-5p, miR-361-3p, miR-877-3p, novel\_111, miR-5703, miR-140-3p, miR-188-3p, miR-2366, miR-133a-3p, miR-218-1-3p, miR-493-3p, miR-1b-3p, miR-30d-3p, miR-18a-3p, miR-106a, miR-222-5p, miR-324-3p, miR-500a-5p, miR-125b, miR-26a-5p, miR-21-3p, miR-106a, miR-20a, miR-329a-5p, miR-2411, miR-486-3p, miR-2424, miR-380-3p, miR-376c-3p, miR-125b-2-3p, miR-433-3p, miR-450a-1-3p, miR-2285c, novel\_99, miR-345-5p, miR-21-3p, miR-216b-3p, miR-552-3p, miR-2331-3p, miR-545-3p, miR-877-5p, miR-6516, miR-376e-3p, miR-216b-5p, miR-30a-3p, miR-2285j, miR-15b-3p, miR-30e-3p, miR-874-5p, miR-130b-5p, miR-450b-3p, miR-17-3p, miR-214, miR-425-5p, miR-3184-5p, miR-6134, miR-338-3p, miR-450c-3p, miR-194-5p, miR-432, miR-873a-5p, miR-223-3p, miR-1434-3p, miR-455-5p, miR-380-3p, miR-2284ab, miR-1260b, miR-31-5p, miR-20b, miR-412-5p, miR-432-5p, miR-2284d, miR-2285g, miR-106a-5p, miR-194a, miR-17-5p, miR-455-5p, miR-125a-5p, miR-124-5p, miR-628-5p, miR-130b-5p, miR-345-5p, miR-18a-3p, miR-3591-3p, miR-378b, miR-376b-5p, miR-2319a, miR-135b-5p, miR-450b-3p, miR-655-5p, miR-320b, miR-26b-5p, miR-7-1-3p, miR-329-5p, miR-144-3p, miR-669, miR-670-3p, novel\_69, miR-374c-3p, miR-502-5p, miR-28c, miR-20a-5p, miR-147-5p, miR-17-3p, miR-326-3p, miR-330-5p, miR-7641, miR-429-3p, miR-450a-1-3p, miR-6516-5p, miR-2411-5p, miR-1260a, miR-200c, miR-543-5p, novel\_127, miR-2898, miR-

miR-200a-3p, novel\_127, miR-181b-5p, miR-17-3p, miR-30c-2-3p, miR-219-3p, miR-664-3p, miR-2285af, miR-376b-3p, miR-3065-3p, miR-199a-5p, miR-380-5p, miR-2478, miR-4286, miR-3064-5p, miR-495-5p, miR-1343-5p, miR-1290, miR-3578, miR-134, miR-129-1-3p, miR-214-5p, miR-134-5p, miR-758-5p, miR-378h, miR-6516-5p, miR-302a-5p, miR-322-5p, miR-376a-5p, miR-423-3p, miR-204-5p, miR-134-5p, novel\_9, miR-409-3p, miR-135a-5p, miR-144, miR-370-5p, miR-378c, miR-193a-5p, miR-16-5p, miR-28a-3p, miR-485-5p, miR-7144-5p, miR-345-5p, miR-876-3p, miR-2448-3p, miR-488-3p, miR-154b-5p, miR-199a-5p, miR-374c-3p, miR-34c-5p, miR-1271, miR-141-3p, miR-370-3p, miR-874-3p, miR-1343-5p, miR-452-5p, miR-377-3p, miR-345-5p, let-7j, miR-2285r, miR-628-5p, miR-382, miR-101-5p, miR-6240, miR-380-5p, miR-27b-3p, miR-497-5p, miR-16-1-3p, miR-16b, miR-374b-3p, miR-708-3p, miR-653, miR-544b, miR-411-5p, miR-3431, miR-130a-3p, miR-31-5p, miR-502b, miR-656-5p, miR-203b-5p, miR-382-5p, miR-34c, miR-16a, miR-15a, miR-301b-3p, miR-2428, miR-199b-5p, miR-449a, novel\_27, miR-211, miR-1193, miR-17-3p, miR-219b-3p, miR-6395, miR-378f, miR-195a-5p, miR-135b-5p, miR-376a-2-5p, miR-19a-3p, miR-412-3p, miR-1291, miR-18a-3p, miR-1306, miR-150-5p, miR-144-3p, miR-34b, miR-374c-3p, miR-3074-5p, miR-21-3p, miR-2484, miR-34b-5p, miR-466i-5p, miR-760-3p, miR-422a, miR-219b-5p, miR-216a-5p, miR-324-3p, miR-2285p, novel\_17, miR-125b-2-3p, miR-130a-5p, miR-29b-1-5p, miR-664b-3p, miR-345-3p, miR-369-3p, miR-34a-5p, miR-2284u, let-7a-3p, miR-16-1-3p, miR-142-3p, miR-19b-3p, miR-493-3p, miR-1197-5p, miR-378a-3p, miR-1193, miR-188-3p, miR-5703, miR-98-3p, miR-2904, miR-2366, miR-378i, miR-328-3p, miR-1247-5p, miR-15a-5p, miR-340-5p, miR-212-5p, miR-18a-3p, miR-208b-5p, miR-454-3p, miR-424-5p, miR-17-3p, miR-487b-5p, miR-324-3p, miR-219b-3p, let-7b-3p, miR-338-3p, miR-98-3p, miR-

miR-660-5p, miR-32-3p, miR-140-5p, miR-30c-1-3p, miR-378a-3p, miR-2331-3p, miR-370-5p, miR-216b-5p, miR-139-5p, miR-377-3p, miR-27a-5p, miR-6516, miR-15b-5p, miR-204-3p, novel\_25, miR-129b-3p, novel\_99, miR-186-5p, miR-625-5p, miR-378c, miR-346, miR-30e-3p, miR-664a-5p, miR-665, miR-324-3p, miR-6516-3p, miR-130b-5p, miR-424-5p, miR-487a-5p, miR-30d-3p, miR-3600, miR-15a-5p, miR-378i, miR-217-5p, miR-378a-3p, miR-188-3p, miR-5703, miR-2904, miR-216c-5p, miR-143-3p, miR-2432, miR-2424, miR-618, miR-345-3p, miR-92a-1-5p, miR-422a, miR-30b-3p, miR-1277-5p, miR-2319b, miR-452-3p, miR-20a-3p, miR-139-5p, miR-126b-5p, miR-2483-3p, miR-378e, miR-7857-3p, miR-203-3p, miR-409-5p, miR-361-3p, miR-129b-5p, miR-381-3p, miR-877-3p, miR-541-3p, miR-3059-5p, miR-2447, miR-9-5p, miR-6527, miR-361-3p, miR-2440, miR-101-3p, miR-301a-5p, miR-2285y, miR-3958-3p, miR-2285t, novel\_78, miR-409b, miR-147a, miR-126a-5p, miR-421, miR-541, miR-301b-5p, miR-378b, miR-125b-2-3p, miR-30b-3p, miR-1388-5p, miR-378c, miR-3120-5p, miR-16-2-3p, miR-424-5p, miR-1388-3p, miR-744-3p, miR-33a-5p, miR-378d, miR-30c-1-3p, miR-8485, miR-193a, miR-1306-5p, miR-326, miR-16b, miR-3955-3p, miR-874-3p, miR-3956, miR-141-3p, miR-370-3p, miR-2285aa, miR-154b-5p, miR-133c, miR-137-3p, miR-329b, let-7g-3p, miR-2318, miR-10b-3p, miR-485-5p, miR-671-5p, miR-16-5p, miR-1197-3p, miR-378c, miR-370-5p, miR-331-3p, miR-100-3p, miR-410-3p, miR-429-3p, miR-2285ad, miR-1224-5p, miR-378h, miR-6516-5p, miR-322-5p, miR-9-5p, miR-3591-5p, miR-345-3p, miR-330-5p, miR-2427, miR-218-2-3p, let-7a-2-3p, miR-200b-3p, miR-30a-3p, miR-450b-5p, miR-490-3p, novel\_39, miR-1957a, miR-200c, miR-125a-3p, miR-217, miR-30c-2-3p, miR-200c-3p, miR-200a-3p, miR-655-5p, miR-670-3p, miR-181b-3p, miR-677, miR-21c, miR-1306, miR-195a-5p, miR-378f, miR-



miR-28c, miR-4324, miR-206, miR-29a, miR-128-1-5p, miR-6123, miR-147-5p, miR-656-5p, miR-219b-3p, miR-1193, miR-29c-3p, miR-193b-3p, miR-24-3p, miR-1307-3p, miR-2428, miR-326-3p, miR-3141, miR-2285ab, miR-18a-3p, miR-1306, miR-1291, miR-135b-5p, miR-9851-3p, miR-146b-5p, miR-378b, miR-3074-5p, novel\_68, miR-10a-5p, miR-26b-5p, miR-7-1-3p, miR-29a-3p, novel\_69, miR-146a, miR-503-5p, novel\_51, miR-3141, miR-330-3p, miR-2285l, miR-193a-3p, miR-125a-5p, miR-1343-5p, miR-6240, miR-668-3p, miR-363-5p, miR-432-3p, miR-503-3p, miR-6412, miR-223-3p, miR-873a-5p, miR-3071-5p, novel\_23, miR-381-5p, miR-138, miR-30b-3p, miR-29b, miR-744-5p, miR-133b-5p, miR-3955-5p, miR-377-5p, miR-339-5p, miR-503-5p, miR-134-3p, miR-412-5p, miR-6238, miR-370-5p, miR-29b-3p, miR-135a-5p, miR-331-3p, miR-125b-5p, miR-138-5p, miR-486b-3p, miR-28-5p, miR-3432a, miR-31-3p, miR-1306-5p, miR-193a-5p, miR-2903, miR-3154, miR-329b, miR-10b-3p, miR-671-5p, miR-485-5p, miR-1248, miR-1814c, miR-23a-5p, miR-874-3p, miR-503-3p, miR-1271, miR-125a, miR-370-3p, miR-2355-5p, miR-154b-5p, miR-339a, miR-30c-2-3p, miR-191-3p, miR-2898, miR-450a-2-3p, novel\_96, novel\_127, miR-2403, miR-4286, miR-1, miR-28b, miR-490-3p, novel\_39, miR-3065-3p, miR-615-3p, miR-330-5p, miR-1343-5p, miR-29d-3p, miR-496, miR-10a-5p, miR-6517, novel\_79, miR-412, miR-214-5p, miR-615, miR-4726-5p, miR-2284q, miR-541-3p, miR-2285f, miR-877-3p, miR-7705, miR-423-5p, miR-361-3p, miR-136-5p, miR-504, miR-10b, miR-378g, miR-4443, miR-326, miR-1306-5p, novel\_19, miR-2957, miR-491-5p, miR-381-5p, miR-214-3p, miR-146b, miR-2330-5p, miR-1388-3p, miR-30c-1-3p, miR-2310, miR-4532, miR-10b, miR-541, miR-2284r, miR-30b-3p, miR-1a-3p, miR-412-3p, miR-101a-5p, novel\_78, miR-2300a-5p, miR-330-3p, miR-409b, miR-425-3p, miR-216a-3p, miR-9788-3p, miR-320a, miR-664a-5p, miR-132, miR-425-5p, miR-1260b, miR-3184-5p, miR-370-5p, miR-5100, miR-2284k, novel\_9, miR-204-5p, miR-487a-5p, miR-32-3p, miR-370-5p, miR-3959-5p, miR-193b-3p, miR-377-3p, miR-499b-3p, miR-204-3p, miR-200a-5p, miR-7144-5p, miR-125b-2-3p, miR-142a-3p, miR-24-2-5p, miR-2424, miR-664-3p, novel\_17, miR-1260a, miR-196a-3p, miR-376b-3p, miR-466i-5p, miR-2284m, miR-412, miR-1224-5p, miR-5703, miR-378d, miR-2447, miR-32-3p, miR-1193, novel\_101, miR-2284j, miR-1839-3p, miR-193b-3p, miR-211, miR-7705, miR-423-5p, novel\_87, miR-502b, miR-2319b, miR-24-1-5p, miR-664b, miR-211-5p, miR-499a-3p, miR-376d, miR-203-3p, miR-677, miR-376b-3p, miR-378j, miR-378b, miR-1306, novel\_94, miR-376a-3p, miR-493-5p, miR-101b-3p, miR-1839-3p, miR-493-5p, miR-376b, miR-33a-5p, miR-2284l, miR-654-3p, miR-1b-5p, miR-377-3p, miR-1306-5p, novel\_51, miR-2957, miR-197-5p, miR-1185-5p, miR-193a-3p, miR-31-5p, miR-181b-2-3p, miR-376b-3p, miR-412-5p, miR-2284d, miR-2355-3p, miR-455-3p, miR-1434-3p, miR-412-3p, miR-7857, miR-1260b, miR-3120-5p, miR-188-5p, miR-2284x

STRADA ENSOARGO( STE20-re

ZNF554 ENSOARGO( zinc fin.

miR-212-3p, miR-541-3p, miR-3059-5p, miR-758-5p, miR-17-3p, miR-362-5p, miR-211, miR-7705, novel\_27, miR-101-3p, miR-15a, miR-485-3p, miR-16a, miR-3968, miR-3074-5p, miR-20a-3p, miR-664b, miR-211-5p, miR-3082-5p, miR-374c-3p, miR-3596, miR-221, miR-9-3p, miR-6516-3p, miR-195a-5p, miR-135b-5p, miR-335-3p, miR-2319a, miR-424-5p, miR-101b-3p, miR-363-5p, miR-23a-3p, miR-432-3p, miR-539-3p, miR-8485, miR-377-3p, miR-16b, miR-124-5p, miR-483-3p, miR-452-5p, miR-665, miR-539-5p, miR-6238, miR-221-3p, miR-500-5p, miR-455-3p, miR-1434-3p, miR-542-3p, miR-541, miR-484, miR-3071-5p, miR-374b-3p, miR-16-1-3p, miR-16b, miR-2284x, miR-188-5p, miR-101c, miR-497-5p, miR-3074-5p, miR-16-5p, miR-135a-1-3p, miR-494-5p, miR-222-3p, miR-338-5p, miR-17-3p, miR-6516-3p, miR-204-5p, miR-424-5p, miR-216b-3p, miR-216b-5p, miR-374c-3p, miR-331-5p, miR-377-3p, miR-15b-5p, miR-487b-5p, miR-3154, miR-362-5p, miR-129b-3p, novel\_99, miR-2385-3p, miR-125b-2-3p, miR-2285b, miR-380-3p, miR-29a-5p, miR-664-3p, miR-217, miR-760-3p, miR-127-5p, miR-17-3p, miR-2898, miR-222, miR-485-3p, miR-7641, miR-380-5p, miR-483-3p, miR-23c, miR-15a-5p, miR-487a-3p, miR-322-5p, miR-383-5p, novel\_121, miR-193b-5p, miR-2366, miR-376a-5p, miR-217-5p, miR-1197-5p, miR-5703, miR-188-3p, miR-1434-5p, miR-2904, miR-493-3p, miR-16-1-3p, miR-22-3p, miR-432, miR-1285, miR-7862, miR-138, miR-29b, miR-149-5p, miR-544b, miR-432-5p, miR-330-3p, miR-365b-5p, miR-2411-3p, novel\_51, miR-193a-3p, miR-378a-5p, let-7f-2-3p, let-7f-2-3p, miR-130b-5p, miR-6240, miR-2285r, miR-1306, miR-18a-3p, miR-3065-5p, miR-2285ab, miR-148a-3p, miR-2284e, miR-320b, novel\_68, miR-329-5p, miR-677, miR-669, miR-181b-3p, miR-29a-3p, miR-4324, miR-29a, miR-193b-3p, miR-17-3p, miR-29c-3p, miR-135a-2-3p, miR-219b-3p, miR-326-3p, miR-29d-3p, miR-23b-5p, miR-330-5p, miR-345-3p, miR-496, miR-582-3p, miR-412, miR-486-5p, miR-2411-5p, miR-543-5p, miR-152-3p, novel\_96, novel\_127, miR-450a-2-3p, miR-17-3p, miR-3064-5p, miR-2385-3p, miR-3529-3p, miR-3065-3p, miR-485-5p, miR-2474, miR-370-3p, miR-1271, miR-874-3p, miR-503-3p, miR-331-3p, miR-2433, miR-29b-3p, miR-28-5p, miR-138-5p, miR-365a-5p, miR-1197-3p, miR-412-3p, miR-296-5p, miR-2284r, miR-544a, miR-181b-2-3p, miR-2300a-5p, miR-330-3p, miR-409b, miR-1185-3p, miR-326, miR-1306-5p, miR-491-5p, miR-3085-3p, miR-744-3p, miR-3187-3p, miR-361-3p, miR-504, miR-7689-3p, miR-126b-5p, miR-4792, miR-3064-5p, miR-2319b, miR-1185-2-3p, miR-3596, miR-2285f, novel\_60, miR-3956-3p, miR-361-3p, miR-1197-5p, miR-2300b-3p, miR-378d, miR-1b-3p, miR-18a-3p, miR-148b-3p, miR-324-3p, miR-345-3p, miR-185-3p, miR-466i-5p, miR-760-3p, miR-2411, miR-181b-1-3p, miR-129b-3p, miR-1895, miR-3065-3p, miR-552-3p, miR-504-5p, miR-2331-3p, miR-496-3p, novel\_32, miR-22-3p, miR-132-5p, miR-544-3p, miR-193b-3p, miR-29d-5p, miR-708-5p, miR-4492, miR-130b-5p, miR-17-3p, miR-664a, miR-338-3p, miR-6134, miR-29c-5p

miR-107, miR-378f, miR-146b-5p, miR-2285ab, miR-216a-3p, miR-3591-3p, miR-18a-3p, miR-669, miR-7-1-3p, miR-655-5p, miR-147-5p, miR-20a-5p, miR-502-5p, miR-4324, novel\_87, miR-371b-3p, miR-24-3p, miR-326-3p, miR-335-5p, miR-17-3p, miR-219a-1-3p, miR-16-1-3p, miR-138, miR-7b-5p, miR-542-3p, miR-223-3p, miR-2113, miR-432, miR-450c-3p, miR-3431, miR-2285g, miR-432-5p, miR-20b, miR-103, miR-2355-3p, novel\_116, miR-194-3p, miR-103a-3p, miR-133b-5p, miR-483-3p, miR-125a-5p, miR-146a, miR-7-5p, novel\_51, miR-106a-5p, miR-17-5p, miR-432-3p, miR-654-3p, miR-432-3p, miR-493-5p, miR-130b-5p, let-7f-2-3p, let-7f-2-3p, miR-668-3p, miR-671-5p, miR-7144-5p, miR-20b-5p, miR-301, miR-488-3p, miR-17-5p, miR-3154, miR-93-5p, miR-769, miR-154b-5p, miR-874-3p, miR-574-5p, miR-125a, miR-1271, miR-141-3p, miR-2285aa, miR-138-5p, miR-191-5p, miR-494-5p, miR-331-3p, miR-6740-5p, miR-125b-5p, miR-93, miR-378c, miR-103b, miR-133a-3p, miR-582-3p, miR-128-3p, miR-330-5p, miR-483-3p, miR-378h, miR-6516-5p, miR-1271-5p, miR-450a-1-3p, miR-582-3p, miR-1224-5p, miR-127-5p, miR-17-3p, miR-200a-3p, miR-543-5p, novel\_127, miR-107, miR-205-5p, miR-30c-2-3p, miR-148b-5p, miR-450c-5p, miR-1271-3p, miR-29a-5p, miR-1957a, miR-4286, miR-30a-3p, miR-3064-5p, miR-504, miR-96-5p, miR-3963, miR-493-5p, miR-3082-5p, miR-2483-3p, miR-378e, miR-1185-2-3p, miR-203-3p, miR-3064-5p, miR-139-5p, miR-7977, miR-2285u, miR-499b-5p, miR-335, miR-450a-5p, miR-4726-5p, miR-2284q, miR-2440, novel\_82, miR-107-5p, miR-301a-5p, miR-769-5p, miR-877-3p, miR-154a, miR-7705, miR-3059-5p, miR-2285f, miR-2426, miR-378c, miR-1388-5p, miR-101c, miR-301b-5p, miR-378b, miR-2284r, miR-484, miR-323b, miR-147a, miR-1185-3p, miR-421, miR-2285e, miR-455-3p, miR-9788-3p, novel\_78, miR-1343-3p, miR-3085-3p, miR-1185-5p, miR-103a-2-5p, miR-146b, miR-326, novel\_103, miR-106b-5p, miR-323b, miR-376a-3p, miR-2440, miR-2285t, miR-502b, miR-378b, miR-1185-2-3p, miR-27a-3p, miR-499a-3p, miR-150-5p, miR-216a-3p, miR-3065-5p, miR-2387, miR-96-5p, miR-299b-5p, let-7f-2-3p, let-7f-2-3p, miR-380-5p, miR-193a, miR-2285r, miR-660, miR-491-5p, miR-27a-3p, miR-31-5p, miR-149-5p, miR-1185-3p, miR-496-5p, miR-125b-2-3p, novel\_23, miR-708-3p, miR-27b-3p, miR-1271, miR-539-5p, miR-28a-3p, miR-30a-3p, miR-2433, miR-34c-3p, miR-30e-3p, miR-708-5p, miR-500, miR-28-5p, miR-532-5p, miR-660-5p, miR-548o-3p, miR-154b-5p, miR-499b-3p, miR-500a-3p, miR-488-3p, miR-2448-3p, miR-503-3p, novel\_48, miR-186-5p, miR-30a-3p, miR-3529-3p, miR-2285w, miR-380-5p, miR-130a-5p, novel\_96, miR-28-3p, miR-30d-3p, miR-2285ad, miR-2284h-5p, miR-758-5p, miR-140-3p, miR-188-3p, novel\_133, miR-128-3p

SYCE1

ENSOARGO(synapton)

AK3

ENSOARGO(adenylat)

miR-490-3p, miR-306b-3p, novel\_39, miR-148b-5p, miR-3064-5p, miR-495-5p, novel\_127, miR-200c-3p, miR-2898, miR-181c-3p, miR-30f, miR-3071-3p, miR-200c, miR-1260a, miR-214-5p, miR-545-5p, miR-322-5p, miR-18b-5p, miR-429-3p, miR-2285ad, miR-30c, miR-128-3p, miR-200b-3p, miR-885-3p, miR-330-5p, miR-30a-5p, miR-1343-5p, miR-615-3p, miR-1260b, miR-1197-3p, miR-2903, miR-103b, miR-193a-5p, miR-16-5p, novel\_42, miR-1306-5p, miR-486b-3p, miR-767-5p, miR-138-5p, miR-331-3p, miR-125b-5p, miR-370-5p, miR-2433, miR-365a-3p, miR-125a, miR-1271, miR-874-3p, miR-329a, miR-767, miR-10b-3p, miR-18a, miR-3154, miR-320a, miR-488-3p, miR-30e-5p, let-7f-2-3p, let-7f-2-3p, miR-668-3p, miR-125a-5p, miR-1343-5p, novel\_51, miR-2331-5p, miR-377-3p, miR-7-5p, miR-149-5p, miR-185-5p, miR-3431, miR-432-5p, miR-27b-3p, miR-497-5p, miR-4508, miR-1260b, miR-138, miR-21-5p, miR-30b-3p, miR-16b, novel\_23, miR-22-3p, miR-7b-5p, miR-1843b-5p, miR-873a-5p, miR-432, miR-2428, miR-326-3p, miR-1193, novel\_101, miR-3957-3p, miR-342-3p, miR-6123, miR-128-1-5p, miR-382-5p, miR-1307-5p, miR-16a, miR-133a-5p, miR-15a, miR-502-5p, miR-669, miR-320c, miR-6535, novel\_69, novel\_68, miR-195a-5p, miR-6516-3p, miR-9851-3p, miR-412-3p, miR-1291, miR-216a-3p, miR-21c, miR-378b, miR-18a-3p, miR-1306, miR-2387, miR-18b, miR-486-3p, miR-3653-3p, miR-30d, miR-466i-5p, miR-760-3p, miR-185-3p, miR-125b, miR-324-3p, miR-30b, miR-532-3p, miR-151-5p, miR-200b, miR-15a-5p, miR-18a-3p, miR-148a-5p, miR-133a-3p, miR-664-5p, miR-4429, miR-140-3p, miR-1434-5p, miR-124-3p, miR-2366, miR-362-3p, miR-2300b-3p, miR-193b-5p, novel\_133, miR-30c-5p, miR-6134, miR-3184-5p, miR-346, miR-6525, miR-665-5p, miR-214, miR-145a-3p, miR-4510, miR-424-5p, miR-874-5p, miR-4492, miR-664a, miR-487b-5p, miR-665, miR-151-3p, miR-15b-5p, miR-151b, miR-22-3p, novel\_32, miR-6130, miR-377-

CAPN1      ENSOARGO(calpain)

miR-671-5p, miR-1814c, miR-20b-5p, miR-23a-5p, miR-329a, miR-329b, miR-23b, miR-17-5p, miR-137-3p, miR-200a-5p, miR-93-5p, miR-30e-5p, miR-154b-5p, miR-133c, miR-615-5p, miR-215-5p, miR-204-5p, miR-409-3p, miR-6740-5p, miR-144, miR-5100, miR-34c-3p, miR-1197-3p, miR-93, miR-6128, miR-1306-5p, miR-28a-3p, miR-128-3p, miR-330-5p, miR-23b-5p, miR-30a-5p, miR-3591-5p, miR-345-3p, novel\_121, miR-545-5p, miR-2411-5p, miR-6516-5p, miR-1271-5p, miR-9-5p, miR-1224-5p, miR-222, miR-2285ad, novel\_127, miR-28-3p, miR-2898, miR-17-3p, miR-3071-3p, miR-30f, miR-2285b, miR-1957a, novel\_39, miR-30a-3p, miR-2319a, miR-19a-3p, miR-18a-3p, miR-3065-5p, miR-21c, miR-216a-3p, miR-150-5p, miR-144-3p, miR-323a-5p, miR-7-1-3p, miR-655-5p, miR-329-5p, miR-378b, miR-147-5p, miR-199c, miR-33a-3p, miR-20a-5p, miR-326-3p, miR-211, miR-2285x, novel\_101, miR-758-5p, miR-17-3p, miR-193b-3p, miR-342-3p, miR-219a-1-3p, miR-21-5p, miR-30b-3p, miR-3071-5p, miR-145a-5p, miR-450c-3p, miR-22-3p, miR-1434-3p, miR-432, miR-20b, miR-544b, miR-194-3p, miR-185-5p, miR-432-5p, miR-31-5p, miR-3955-5p, miR-193a-3p, miR-452-5p, miR-124-5p, miR-378a-5p, miR-106a-5p, miR-2411-3p, miR-17-5p, miR-197-5p, miR-432-3p, let-7f-2-3p, let-7f-2-3p, miR-130b-5p, novel\_99, miR-1827, miR-582-5p, miR-625-5p, miR-655, miR-433-3p, miR-30d-5p, novel\_32, novel\_25, miR-22-3p, miR-139-5p, miR-323-5p, miR-193b-3p, miR-544-3p, miR-192-5p, miR-132-5p, miR-499b-3p, miR-582-5p, miR-6516, miR-548o-3p, miR-130b-5p, miR-129-5p, miR-17-3p, miR-664a, novel\_74, miR-338-5p, miR-655-3p, miR-665, miR-3604, miR-30a-3p, miR-324-3p, miR-30e-3p, miR-2285j, miR-222-3p, miR-6134, miR-425-5p, miR-1271, miR-218-1-3p, miR-33b-3p, miR-19b-3p, miR-362-3p, miR-215-5p, miR-199a-3p, novel\_83, miR-23c, miR-340-5p, miR-23b-3p, miR-7859, miR-30d-3p, miR-380-5p, miR-3600, miR-106a, miR-548a-3p, miR-18a-

miR-126b-3p, miR-125b-5p, miR-331-3p, miR-135a-5p, miR-551b-3p, miR-145-3p, miR-1197-3p, miR-1260b, miR-193a-5p, miR-6128, miR-1306-5p, miR-7144-5p, miR-876-3p, miR-2474, let-7g-3p, miR-345-5p, miR-329a, miR-3154, miR-34c-5p, miR-2355-5p, miR-125a, miR-574-5p, miR-543-5p, miR-181b-5p, miR-30c-2-3p, miR-1260a, miR-2285af, miR-3065-3p, miR-1271-3p, miR-24-2-5p, miR-28b, miR-3064-5p, miR-29b-2-5p, miR-2403, miR-128-3p, let-7a-2-3p, miR-330-5p, miR-505-5p, miR-24-2-5p, miR-2411-5p, miR-412, miR-299a-3p, miR-6517, miR-147-5p, miR-34c, miR-28c, miR-326-3p, miR-449a, miR-24-3p, miR-3959-3p, miR-193b-3p, novel\_101, miR-758-5p, miR-135b-5p, miR-1306, miR-216a-3p, miR-21c, miR-3591-3p, miR-2387, miR-3141, miR-669, miR-34b, miR-299b-3p, miR-3120-3p, miR-125a-5p, miR-452-5p, miR-193a-3p, miR-3141, miR-455-5p, miR-7-5p, miR-224-5p, miR-377-3p, miR-296-3p, miR-296-3p, miR-345-5p, let-7a-2-3p, miR-668-3p, miR-455-5p, miR-30b-3p, miR-21-5p, miR-1260b, miR-181a-5p, miR-7b-5p, miR-149-5p, miR-194-3p, miR-3431, miR-133b-5p, miR-874-5p, miR-664a, miR-665, miR-29b-2-5p, miR-15b-3p, miR-3184-5p, miR-181c-5p, miR-338-3p, miR-224-5p, miR-346, miR-3074-2-3p, miR-543-3p, miR-345-5p, miR-433-3p, miR-21a-3p, miR-204-3p, miR-377-3p, miR-193b-3p, miR-21-3p, miR-3065-3p, miR-30c-1-3p, miR-504-5p, miR-34b-5p, miR-299-3p, miR-21-3p, miR-324-3p, miR-125b, miR-210-5p, miR-2411, miR-29b-1-5p, miR-34a-5p, miR-378d, miR-5703, miR-188-3p, miR-362-3p, miR-2366, miR-532-3p, miR-380-5p, miR-2440, miR-423-5p, miR-181d-5p, miR-2447, miR-541-3p, miR-504, miR-24-1-5p, miR-3064-5p, miR-153-3p, miR-3085-3p, miR-2957, miR-29b-1-5p, miR-362-3p, miR-326, miR-1306-5p, miR-8485, miR-758-3p, miR-30c-1-3p, miR-1388-3p, miR-382-3p, miR-494-3p, miR-3120-5p, miR-362-3p, miR-1388-5p, miR-412-3p, miR-30b-3p, miR-758-3p, miR-484, miR-329-3p, miR-541, miR-

PRMT2      ENSOARGO(protein

miR-185-3p, miR-542-5p, miR-1277-5p, miR-320d, miR-2284m, miR-183-5p, miR-216c-5p, miR-146a-5p, miR-130a-5p, miR-5703, novel\_133, miR-378d, miR-4429, miR-485-3p, miR-505-3p, miR-3600, miR-548e-3p, miR-148b-3p, miR-15a-5p, miR-487a-3p, miR-320e, miR-222-3p, miR-424-5p, miR-6516-3p, miR-450b-3p, miR-425-5p, miR-4510, miR-6134, miR-27b-5p, miR-21a-3p, miR-154b-3p, miR-30f, miR-532-5p, miR-182-5p, miR-21-3p, miR-3065-3p, miR-545-3p, miR-6130, miR-27a-5p, miR-6516, miR-326, novel\_103, miR-320b, miR-542-5p, novel\_124, miR-652-5p, miR-424-5p, miR-3187-3p, miR-30b-3p, miR-412-3p, miR-2284aa, miR-16-2-3p, miR-27a-3p, miR-222-5p, miR-2285e, miR-500-5p, miR-221-3p, miR-107-5p, miR-371a-5p, miR-30b-5p, miR-3059-5p, miR-362-5p, miR-199b-5p, miR-361-3p, miR-7977, miR-541-5p, miR-27a-3p, miR-3082-5p, miR-217, miR-2285af, miR-543-5p, miR-4286, miR-199a-5p, miR-3065-3p, miR-30a-5p, miR-134, miR-345-3p, miR-582-3p, miR-222, miR-6516-5p, miR-409-3p, miR-26c, miR-1-5p, miR-486b-3p, miR-138-5p, miR-103b, miR-6128, miR-145-3p, miR-323-3p, miR-500b-5p, miR-362-5p, miR-320a, miR-503-3p, miR-671-5p, miR-1814c, miR-7144-5p, miR-3074-1-3p, miR-141-3p, miR-487a-3p, miR-154b-5p, miR-199a-5p, miR-455-5p, miR-197-5p, miR-130b-5p, miR-539-3p, miR-1434-3p, miR-653, miR-455-5p, miR-219a-1-3p, miR-2284ab, miR-138, miR-30b-3p, miR-21-5p, miR-130a-3p, miR-6238, miR-185-5p, miR-2285g, miR-16a, miR-502-5p, miR-15a, miR-199c, novel\_1, miR-542-5p, miR-2428, miR-326-3p, miR-21c, miR-6516-3p, miR-6395, miR-505-3p, miR-195a-5p, miR-450b-3p, miR-7-1-3p, miR-320b, miR-2404, miR-345-3p, miR-500a-5p, miR-30b, miR-2484, miR-2285w, miR-487a, miR-486-3p, miR-376c-3p, miR-217-5p, miR-98-3p, miR-193b-5p, miR-30c-5p, miR-218-1-3p, miR-142-3p, novel\_73, miR-328-3p, miR-2284h-5p, miR-228, miR-23b-3p, miR-3604, miR-664a-5p, let-7b-3p, miR-130b, miR-486-3p, miR-2428, miR-124a, miR-491-5p, miR-4492, miR-1343-5p, miR-486b-3p, novel\_96, miR-2433, miR-324-3p, miR-505-5p, miR-378g, miR-134-3p, miR-6535, miR-486-5p, miR-10b, novel\_133, miR-124-3p, miR-1343-5p, novel\_133, miR-23b, miR-23b-5p, miR-1306, miR-2426, miR-23a-5p, miR-3957-5p, miR-3955-5p, miR-3120-3p, miR-370-3p, miR-23c, miR-23b-3p, miR-877-5p, miR-3957, miR-1306-5p, novel\_115, miR-382-5p, miR-664a, miR-2898, miR-502b, miR-23a-3p, miR-2428, miR-181a-2-3p, miR-105-3p, miR-214, miR-1193, novel\_63, miR-370-5p, miR-210-5p, miR-125b-5p, miR-219b-5p, miR-125b, miR-221-5p, miR-125a-5p, miR-2285o, miR-214-3p, miR-221-5p, miR-504-5p, miR-1343-3p, miR-370-5p, miR-125a, miR-1197-5p, miR-504, miR-1895

miR-376b-3p, miR-3591-3p, miR-216a-3p, miR-378b, miR-19a-3p, miR-410-5p, miR-450b-3p, miR-26b-5p, miR-181b-3p, miR-144-3p, miR-320c, miR-677, miR-374c-3p, miR-425-5p, miR-20a-5p, miR-379-3p, miR-6119-3p, miR-495-3p, miR-758-5p, miR-3957-3p, miR-2428, miR-199b-5p, miR-326-3p, miR-371b-3p, miR-323c, miR-542-3p, miR-1843b-5p, miR-1434-3p, miR-181a-5p, miR-708-3p, miR-873a-5p, miR-219a-1-3p, miR-30b-3p, miR-20b, miR-194-3p, miR-106a-5p, miR-136-3p, miR-17-5p, miR-2411-3p, miR-190a, miR-330-3p, miR-377-3p, miR-224-5p, miR-1343-5p, miR-668-3p, miR-6240, miR-432-3p, miR-17-5p, miR-320a, miR-362-5p, miR-3154, miR-137-3p, miR-200a-5p, miR-93-5p, miR-30e-5p, miR-1248, novel\_48, miR-20b-5p, miR-3956, miR-141-3p, miR-215-5p, miR-574-5p, miR-3957-5p, miR-3957, miR-154b-5p, miR-376c-3p, miR-199a-5p, miR-769, miR-374c-3p, miR-3969, miR-144, miR-331-3p, miR-5100, miR-486b-3p, miR-134-5p, miR-103b, miR-144-5p, miR-133a-3p, miR-6128, miR-3607-3p, miR-28a-3p, miR-93, miR-500b-5p, miR-30a-5p, miR-330-5p, miR-1343-5p, miR-134, miR-345-3p, miR-30c, miR-200b-3p, miR-128-3p, miR-582-3p, miR-411-3p, miR-429-3p, miR-2285ad, miR-545-5p, miR-134-5p, miR-582-3p, miR-1271-5p, miR-200c, miR-376b-3p, miR-205-5p, miR-200a-3p, miR-181b-5p, miR-200c-3p, miR-28-3p, miR-3064-5p, miR-2385-3p, miR-2285b, miR-199a-5p, miR-200a, novel\_39, miR-381-3p, miR-129b-5p, miR-199b-5p, miR-140-5p, miR-9-3p, novel\_94, miR-376a-3p, miR-335-3p, miR-504, miR-96-5p, miR-7977, miR-541-5p, miR-499b-5p, miR-3064-5p, miR-139-5p, miR-376d, miR-203-3p, miR-144-5p, miR-3082-5p, miR-489, miR-2483-3p, miR-499a-3p, miR-7857-3p, miR-2285y, miR-769-5p, miR-382-3p, miR-30b-5p, miR-3958-3p, miR-3968, miR-190b-5p, miR-181d-5p, miR-6527, miR-541-3p, miR-2447, miR-3059-5p, miR-8095, miR-362-5p, miR-30b-3p, miR-125b-2-3p, miR-322b, miR-541, miR-2284r, miR-1829-5p, miR-2426, miR-1388-



miR-504, miR-544-5p, miR-1983, miR-361-3p, miR-199b-5p, miR-381-3p, miR-378g, miR-7857-3p, miR-378e, miR-4792, miR-3064-5p, miR-20a-3p, miR-452-3p, miR-211-5p, miR-3968, miR-4726-5p, miR-2284q, novel\_82, miR-2285n, miR-301a-5p, miR-107-5p, miR-361-3p, miR-423-5p, novel\_60, miR-4454, miR-3956-3p, miR-541-3p, miR-378c, miR-1388-5p, miR-450b-5p, miR-3120-5p, miR-378b, miR-296-5p, miR-2284r, miR-10b, miR-301b-5p, miR-541, miR-30b-3p, miR-147a, miR-455-3p, miR-9788-3p, miR-330-3p, miR-1343-3p, miR-181b-2-3p, miR-3085-3p, miR-491-5p, miR-199b-5p, miR-103a-2-5p, miR-320b, miR-106b-5p, miR-16b, miR-378d, miR-3187-3p, miR-424-5p, miR-2330-5p, miR-133b-3p, miR-339b, miR-1895, miR-450a-1-3p, miR-3613-5p, let-7f-1-3p, miR-129b-3p, miR-377-3p, miR-10a, miR-323-5p, miR-6130, miR-22-3p, miR-15b-5p, miR-378a-3p, miR-2331-3p, miR-504-5p, miR-548c-3p, miR-370-5p, miR-450b-3p, miR-17-3p, miR-874-5p, miR-424-5p, miR-708-5p, let-7b-3p, miR-320e, miR-665, miR-664a-5p, miR-10b-5p, miR-6525, miR-3184-5p, miR-122-5p, miR-6134, miR-338-3p, miR-378c, miR-4510, miR-3074-5p, miR-665-5p, miR-4429, miR-133a-3p, novel\_133, miR-378i, miR-2300b-3p, miR-2904, miR-378a-3p, miR-5703, miR-15a-5p, miR-2284h-5p, miR-328-3p, miR-3960, miR-380-5p, miR-505-3p, miR-320d, miR-760-3p, miR-30b-3p, miR-210-5p, miR-208b-3p, miR-216a-5p, miR-324-3p, miR-125b, miR-185-3p, miR-345-3p, miR-422a, miR-376a-5p, miR-181b-1-3p, miR-20a, miR-1291, miR-412-3p, miR-6395, miR-505-3p, miR-378f, miR-195a-5p, miR-378b, miR-323a-5p, miR-374c-3p, miR-320c, miR-669, miR-677, miR-181b-3p, miR-3074-5p, miR-378b, miR-10a-5p, miR-4324, miR-3613, miR-15a, miR-28c, miR-208a-3p, miR-20a-5p, miR-16a, miR-211, miR-24-3p, miR-199b-5p, miR-3957-3p, novel\_101, miR-1193, miR-758-5p, miR-17-3p, miR-30b-3p, miR-16b, miR-497-5p, miR-873a-5p, miR-22-3p, miR-450c-3p, miR-374b-3p, miR-3431, miR-185-

miR-1298-3p, miR-142-5p, miR-411-5p, miR-199b-3p, miR-105-1, miR-330-3p, miR-27a-3p, miR-30b-3p, miR-138, miR-219a-1-3p, miR-27b-3p, miR-2284r, miR-2113, miR-450c-3p, miR-30b-3p, miR-3071-5p, miR-374b-3p, miR-2284l, miR-6240, miR-382, miR-376b, miR-491-5p, miR-378a-5p, miR-199b-5p, miR-660, miR-193a-3p, miR-330-3p, miR-105-5p, novel\_51, miR-7857-3p, miR-374c-3p, miR-4443, miR-27a-3p, miR-139-5p, miR-20a-3p, miR-329-5p, miR-7689-3p, miR-126b-5p, miR-7977, miR-450b-3p, miR-504, miR-412-3p, miR-335-3p, miR-1983, miR-199b-5p, miR-148a-3p, miR-216a-3p, miR-877-3p, novel\_27, miR-199b-5p, novel\_60, miR-3956-3p, miR-193b-3p, miR-421-5p, miR-490-5p, miR-199c, miR-218-5p, miR-1247-3p, miR-1973, miR-485-3p, miR-382-5p, miR-148b-3p, miR-450a-1-3p, miR-3600, miR-128-3p, miR-105-2, miR-361-5p, novel\_133, miR-1290, miR-2300b-3p, miR-2904, miR-376a-5p, novel\_39, miR-2432, miR-199a-5p, miR-329a-5p, miR-216c-5p, miR-369-3p, miR-29b-2-5p, miR-4286, miR-2898, miR-1a-2-5p, miR-127-5p, miR-30b-3p, miR-152-3p, novel\_96, miR-216a-5p, miR-185-3p, miR-192-5p, miR-2284s, miR-374c-3p, miR-6130, miR-3959-5p, miR-216b-5p, miR-193b-3p, miR-139-5p, miR-199a-5p, miR-133c, miR-504-5p, miR-2331-3p, miR-660-5p, miR-2355-5p, miR-215-5p, miR-329b, miR-7144-5p, novel\_99, miR-450a-1-3p, miR-655, miR-433-3p, miR-142a-5p, miR-6525, miR-6134, miR-4510, miR-138-5p, miR-450b-3p, miR-4492, miR-487a-5p, miR-592, miR-410-5p, miR-6740-5p, miR-655-3p, miR-29b-2-5p  
miR-128-3p, miR-200b-3p, miR-2284aa, miR-27b-3p, novel\_73, miR-33b-3p, miR-3071-5p, miR-30a-5p, miR-873a-5p, miR-455-3p, miR-2284z, miR-23b-3p, miR-24-2-5p, miR-376b-3p, miR-23c, miR-200b, miR-1224-5p, miR-27a-3p, miR-429-3p, miR-30d, miR-543-5p, miR-200c-3p, miR-376b-3p, miR-200c, miR-2285p, miR-2432, miR-1957a, miR-2424, miR-1271-3p, miR-195a-3p, miR-23a-3p, miR-369-3p, let-7c-3p, miR-493-5p, miR-376a-3p, miR-493-5p, miR-181a-3p, let-7g-3p, miR-23b, miR-216a-3p, miR-376b-3p, miR-30d-5p, miR-30e-5p, miR-144-5p, miR-27a-3p, miR-376d, miR-2284s, miR-374c-3p, miR-370-5p, miR-3120-3p, miR-552-3p, miR-140-5p, miR-363, miR-331-3p, miR-338-5p, miR-2285j, miR-370-5p, miR-2332, miR-181c-3p, miR-2285x, miR-144-5p, miR-1193

PDCD1LG2 ENSOARGO(programm  
RIC1 ENSOARGO(RIC1 hom

miR-125a-3p, miR-6119-5p, miR-205-5p, miR-339a, miR-30c-2-3p, miR-450a-2-3p, miR-2898, miR-543-5p, novel\_127, novel\_96, miR-200a-3p, miR-92a-3p, miR-29b-2-5p, miR-3064-5p, miR-92b-3p, miR-28b, miR-2285b, miR-490-3p, miR-199a-5p, miR-200a, novel\_39, miR-376b-5p, miR-376c-5p, miR-29a-5p, miR-582-3p, miR-300, miR-10a-5p, miR-222, miR-2285ad, miR-299a-3p, novel\_79, miR-378h, miR-6516-5p, miR-1271-5p, miR-24-2-5p, miR-9-5p, miR-5100, miR-3969, miR-6740-5p, miR-767-5p, miR-374b-3p, miR-1197-3p, miR-378c, miR-381-3p, miR-3154, novel\_91, miR-345-5p, miR-767, miR-876-3p, miR-874-3p, miR-141-3p, miR-2355-5p, miR-25-3p, miR-34c-5p, miR-300-3p, miR-199a-5p, miR-146a, miR-377-3p, miR-296-3p, miR-7-5p, miR-503-5p, novel\_51, miR-32, miR-2285l, miR-124-5p, miR-193a-3p, miR-130b-5p, miR-363-5p, miR-2285r, miR-345-5p, miR-296-3p, miR-1285, miR-542-3p, miR-7b-5p, miR-653, miR-873a-5p, miR-145a-5p, miR-374b-3p, miR-219a-1-3p, miR-122-3p, miR-31-5p, miR-130a-3p, miR-339-5p, miR-503-5p, miR-134-3p, miR-411-5p, miR-142b, miR-28c, miR-576-3p, miR-502-5p, miR-382-5p, miR-34c, miR-92a-3p, miR-193b-3p, miR-2284w, miR-199b-5p, miR-2428, miR-449a, miR-2387, miR-18a-3p, miR-378b, miR-150-5p, miR-1291, miR-378f, miR-6395, miR-2319a, miR-9851-3p, miR-146b-5p, miR-378b, novel\_68, miR-3120-3p, miR-10a-5p, miR-34b, miR-374c-3p, miR-299b-3p, miR-670-3p, miR-2404, miR-6535, miR-2285p, novel\_17, miR-210-5p, miR-92a-1-5p, miR-422a, miR-760-3p, miR-299-3p, miR-30b-3p, miR-34b-5p, miR-3653-3p, miR-503-5p, miR-130a-5p, miR-146a-5p, miR-2424, miR-1246, miR-2366, novel\_133, miR-378i, miR-378a-3p, miR-19b-3p, miR-493-3p, miR-34a-5p, miR-148a-5p, miR-18a-3p, miR-212-5p, miR-328-3p, miR-222-3p, miR-3604, miR-665, miR-29b-2-5p, miR-324-3p, miR-664a, miR-130b-5p, miR-4492, miR-145a-3p, miR-145a-3p, miR-3184-3p, miR-378c, miR-433-5p, miR-

miR-30d-5p, miR-21a-3p, miR-2285c, miR-582-5p, miR-1827, miR-133b-3p, miR-30f, miR-216b-3p, miR-552-3p, miR-378a-3p, miR-2331-3p, miR-548o-3p, miR-204-3p, miR-15b-5p, let-7i-5p, miR-499b-3p, miR-132-5p, miR-582-5p, miR-377-3p, miR-2284s, miR-6130, miR-324-3p, miR-664a-5p, miR-320e, let-7b-3p, let-7f, miR-424-5p, miR-664a, miR-3074-2-3p, miR-214, miR-2330-3p, let-7b, miR-378c, miR-4510, miR-3074-5p, miR-129-2-3p, miR-3184-5p, let-7b-5p, miR-181c-5p, miR-6525, miR-378a-3p, miR-1197-5p, miR-140-3p, miR-217-5p, miR-188-3p, miR-378i, miR-30c-5p, miR-362-3p, miR-1961, miR-664-5p, miR-16-1-3p, miR-218-1-3p, miR-378d, miR-33b-3p, novel\_73, miR-380-5p, miR-212-5p, miR-18a-3p, miR-548e-3p, miR-106a, miR-7859, miR-23b-3p, miR-23c, miR-15a-5p, miR-324-3p, miR-500a-5p, miR-422a, miR-30b, miR-1277-5p, let-7k, miR-106a, miR-98-5p, miR-20a, miR-345-3p, miR-329a-5p, miR-2285w, miR-2424, miR-146a-5p, miR-125b-2-3p, miR-381-3p, miR-361-3p, miR-140-5p, miR-493-5p, miR-877-3p, miR-7689-3p, miR-211-5p, miR-20a-3p, miR-452-3p, miR-2319b, let-7d-5p, miR-203-3p, miR-499a-3p, miR-378e, miR-371a-5p, miR-30b-5p, miR-101-3p, miR-2440, miR-2284q, miR-6527, miR-452-5p, miR-181d-5p, miR-3059-5p, miR-2447, miR-423-5p, miR-362-5p, miR-877-3p, miR-7857, miR-30b-3p, miR-378b, miR-329-3p, miR-484, miR-2284r, miR-378c, miR-362-3p, miR-5010-3p, miR-145b, miR-2300a-5p, miR-548w, miR-500-5p, miR-2285e, miR-147a, miR-362-3p, miR-2957, miR-106b-5p, miR-16b, miR-342, novel\_103, miR-146b, miR-214-3p, let-7e, miR-1185-5p, miR-487b-5p, miR-23a-3p, miR-33a-5p, miR-652-5p, miR-1388-3p, let-7a-5p, miR-494-3p, miR-382-3p, miR-2330-5p, miR-106a-5p, miR-424-5p, miR-8485, miR-378d, miR-93-5p, miR-17-5p, miR-23b, miR-362-5p, miR-3154, miR-30e-5p, miR-381-3p, miR-503-3p, miR-331-5p, miR-424-3p, miR-2448-3p, miR-20b-5p, miR-10b-3p, miR-329a, miR-141-3p, miR-874-3p, miR-3968, miR-769-5p, miR-502-3p, miR-2285f, novel\_60, miR-3956-3p, miR-541-3p, miR-410-5p, miR-3970, miR-21c, miR-129b-5p, miR-2285ab, miR-203-3p, miR-500-3p, miR-2483-3p, miR-139-5p, miR-3074-5p, miR-1185-5p, miR-2411-3p, miR-668-3p, miR-1839-5p, miR-30b-3p, miR-544a, miR-16-1-3p, miR-450c-3p, miR-501-3p, miR-30b-3p, miR-223-3p, miR-1434-3p, miR-541, miR-148b-5p, miR-455-3p, miR-2285e, miR-544b, miR-2285g, miR-500, miR-134-5p, miR-450b-3p, miR-665, miR-3604, miR-769-5p, miR-323-3p, miR-3958-5p, miR-3074-5p, miR-186-5p, miR-2312, miR-500a-3p, miR-200a-5p, miR-381-3p, miR-450a-1-3p, miR-2285c, miR-544-3p, miR-3959-5p, miR-769, miR-139-5p, miR-365a-3p, miR-296-3p, miR-545-3p, miR-92a-1-5p, miR-217, miR-185-3p, miR-148b-5p, miR-345-3p, miR-216c-5p, miR-16-1-3p, miR-148a-5p, miR-300, miR-2904, miR-217-5p, miR-501-3p, miR-188-3p, miR-345-3p, miR-134, miR-134-5p, miR-450a-1-3p, miR-429-3p

DCUN1D3 ENSOARGO(DCN1, de 5p, miR-125b-2-3p, miR-381-3p, miR-361-3p, miR-140-5p, miR-493-5p, miR-877-3p, miR-7689-3p, miR-211-5p, miR-20a-3p, miR-452-3p, miR-2319b, let-7d-5p, miR-203-3p, miR-499a-3p, miR-378e, miR-371a-5p, miR-30b-5p, miR-101-3p, miR-2440, miR-2284q, miR-6527, miR-452-5p, miR-181d-5p, miR-3059-5p, miR-2447, miR-423-5p, miR-362-5p, miR-877-3p, miR-7857, miR-30b-3p, miR-378b, miR-329-3p, miR-484, miR-2284r, miR-378c, miR-362-3p, miR-5010-3p, miR-145b, miR-2300a-5p, miR-548w, miR-500-5p, miR-2285e, miR-147a, miR-362-3p, miR-2957, miR-106b-5p, miR-16b, miR-342, novel\_103, miR-146b, miR-214-3p, let-7e, miR-1185-5p, miR-487b-5p, miR-23a-3p, miR-33a-5p, miR-652-5p, miR-1388-3p, let-7a-5p, miR-494-3p, miR-382-3p, miR-2330-5p, miR-106a-5p, miR-424-5p, miR-8485, miR-378d, miR-93-5p, miR-17-5p, miR-23b, miR-362-5p, miR-3154, miR-30e-5p, miR-381-3p, miR-503-3p, miR-331-5p, miR-424-3p, miR-2448-3p, miR-20b-5p, miR-10b-3p, miR-329a, miR-141-3p, miR-874-3p, miR-3968, miR-769-5p, miR-502-3p, miR-2285f, novel\_60, miR-3956-3p, miR-541-3p, miR-410-5p, miR-3970, miR-21c, miR-129b-5p, miR-2285ab, miR-203-3p, miR-500-3p, miR-2483-3p, miR-139-5p, miR-3074-5p, miR-1185-5p, miR-2411-3p, miR-668-3p, miR-1839-5p, miR-30b-3p, miR-544a, miR-16-1-3p, miR-450c-3p, miR-501-3p, miR-30b-3p, miR-223-3p, miR-1434-3p, miR-541, miR-148b-5p, miR-455-3p, miR-2285e, miR-544b, miR-2285g, miR-500, miR-134-5p, miR-450b-3p, miR-665, miR-3604, miR-769-5p, miR-323-3p, miR-3958-5p, miR-3074-5p, miR-186-5p, miR-2312, miR-500a-3p, miR-200a-5p, miR-381-3p, miR-450a-1-3p, miR-2285c, miR-544-3p, miR-3959-5p, miR-769, miR-139-5p, miR-365a-3p, miR-296-3p, miR-545-3p, miR-92a-1-5p, miR-217, miR-185-3p, miR-148b-5p, miR-345-3p, miR-216c-5p, miR-16-1-3p, miR-148a-5p, miR-300, miR-2904, miR-217-5p, miR-501-3p, miR-188-3p, miR-345-3p, miR-134, miR-134-5p, miR-450a-1-3p, miR-429-3p

MICU2 ENSOARGO(mitochon

miR-2285ab, miR-378b, miR-150-5p, miR-1291, miR-6395, miR-3120-3p, miR-10a-5p, novel\_69, miR-299b-3p, miR-34b, miR-669, miR-34c, miR-495-3p, miR-17-3p, novel\_27, miR-449a, miR-432, miR-653, miR-19b-2-5p, miR-22-3p, miR-30b-3p, miR-138, miR-7862, miR-2889, miR-340-3p, miR-134-3p, miR-503-5p, miR-185-5p, miR-2285g, miR-432-5p, miR-2355-3p, miR-194-3p, miR-503-5p, miR-1343-5p, miR-628-5p, miR-432-3p, miR-2285r, miR-432-3p, miR-370-3p, miR-365a-3p, miR-34c-5p, miR-135a-1-3p, miR-331-3p, miR-6740-5p, miR-138-5p, miR-486b-3p, miR-28-5p, miR-193a-5p, miR-615-3p, miR-1343-5p, miR-582-3p, miR-10a-5p, miR-6517, miR-299a-3p, miR-6516-5p, miR-505-5p, miR-214-5p, miR-17-3p, miR-543-5p, miR-504, miR-877-3p, miR-2319b, miR-2483-3p, miR-378g, miR-4443, miR-615, miR-4726-5p, miR-490-5p, miR-541-3p, miR-2447, miR-2285f, miR-361-3p, miR-423-5p, miR-10b, miR-541, miR-484, miR-30b-3p, miR-450b-5p, miR-3120-5p, miR-151a-3p, novel\_4, miR-147a, miR-2285e, miR-455-3p, miR-216a-3p, novel\_103, novel\_115, miR-2330-5p, miR-4532, miR-2285c, miR-21a-3p, miR-2312, miR-1827, miR-625-5p, miR-2331-3p, miR-504-5p, miR-221-5p, miR-296-3p, miR-6516, miR-10a, miR-27a-5p, miR-22-3p, miR-204-3p, miR-665, miR-19b-1-5p, miR-151-3p, miR-132-5p, miR-324-3p, miR-17-3p, miR-664a, miR-708-5p, miR-874-5p, miR-4492, miR-665-5p, miR-3074-2-3p, miR-346, miR-10b-5p, miR-3184-5p, novel\_133, miR-184-3p, miR-34a-5p, miR-378d, miR-222-5p, miR-328-3p, miR-196a-3p, miR-92a-1-5p, miR-185-3p, miR-500a-5p, miR-324-3p, miR-760-3p, miR-299-3p, miR-34b-5p, miR-221-5p, miR-503-5p, miR-130a-5p, miR-486-3p

miR-34b, miR-670-3p, miR-10a-5p, miR-655-5p, miR-378b, miR-6395, miR-195a-5p, miR-379-5p, miR-7975, miR-9851-3p, miR-1291, miR-450b-3p, miR-2428, miR-449a, miR-24-3p, miR-323c, miR-211, miR-2285x, novel\_101, miR-17-3p, miR-1193, miR-656-5p, miR-92a-3p, miR-382-5p, let-7i, miR-34c, miR-16a, miR-6402, miR-15a, miR-544b, let-7g-5p, miR-26b-3p, miR-133b-5p, miR-1260b, miR-2284ab, miR-138, miR-3071-5p, miR-1285, miR-345-5p, miR-363-5p, miR-130b-5p, miR-452-5p, miR-125a-5p, miR-224-5p, miR-2284n, miR-3957, miR-34c-5p, miR-215-5p, miR-141-3p, miR-370-3p, miR-3957-5p, miR-671-5p, miR-485-5p, miR-1814c, miR-7144-5p, miR-320a, miR-365a-5p, miR-2903, miR-6128, miR-1306-5p, miR-28-5p, miR-204-5p, miR-138-5p, miR-370-5p, miR-410-5p, miR-545-5p, miR-24-2-5p, miR-10a-5p, miR-200b-3p, miR-128-3p, let-7d, miR-134, miR-345-3p, miR-1271-3p, miR-24-2-5p, miR-4286, miR-181a-2-3p, miR-1, miR-29b-2-5p, miR-92a-3p, miR-200c-3p, miR-17-3p, miR-2898, miR-339a, let-7c-5p, miR-200c, miR-6119-5p, miR-2397-5p, miR-1260a, miR-27a-3p, let-7d-5p, miR-3082-5p, miR-541-5p, miR-452-3p, miR-3064-5p, novel\_94, miR-129b-5p, miR-361-3p, miR-154a, miR-541-3p, miR-382-3p, miR-216a-3p, miR-27a-3p, novel\_4, miR-3120-5p, miR-2284aa, miR-450b-5p, miR-2426, miR-7857, miR-10b, miR-143-5p, miR-193a, miR-424-5p, let-7a-5p, let-7e, miR-3955-3p, miR-3085-3p, miR-362-3p, miR-2957, miR-1306-5p, miR-320b, miR-204-3p, miR-192-5p, miR-182-5p, miR-532-5p, miR-370-5p, miR-21-3p, miR-221-5p, miR-545-3p, miR-338-3p, let-7b-5p, miR-206-3p, miR-10b-5p, miR-145a-3p, miR-708-5p, miR-208b-5p, miR-424-5p, miR-17-3p, miR-29b-2-5p, miR-324-3p, miR-532-3p, novel\_83, miR-15a-5p, miR-148b-3p, miR-200b, miR-548e-3p, miR-4429, miR-188-3p, miR-1197-5p, miR-2904, miR-215-5p, miR-362-3p, novel\_133, miR-5100, miR-30b-3p, miR-34b-5p, miR-221-5p, miR-2284m, miR-220d, miR-125b, miR-196a-2-3p, miR-34c-5p, miR-34b, miR-134-5p, miR-1247-5p, miR-449a, miR-6134, miR-134, miR-2440, miR-34c, miR-132-5p, miR-665, miR-34b-5p, miR-134-5p, miR-34a-5p

UBA1

ENSOARGO(ubiquiti

GALNS

ENSOARGO(galactos

novel\_32, miR-22-3p, miR-15b-5p, miR-582-5p, miR-301a-3p, miR-499b-3p, miR-3065-3p, miR-182-5p, miR-30c-1-3p, miR-885-3p, miR-582-5p, miR-345-5p, miR-500a-3p, miR-433-3p, miR-21a-3p, miR-3184-5p, miR-6525, miR-346, miR-224-5p, miR-1271, miR-665-5p, miR-3074-2-3p, miR-3074-5p, miR-3184-3p, miR-500, miR-424-5p, miR-454-3p, miR-1468-5p, miR-130b-5p, novel\_74, miR-6516-3p, miR-17-3p, miR-320e, miR-23b-3p, miR-7859, miR-23c, miR-15a-5p, miR-3600, miR-212-5p, miR-548e-3p, miR-18a-3p, miR-124-3p, miR-1197-5p, miR-217-5p, miR-2300b-3p, miR-146a-5p, miR-2411, miR-2432, miR-380-3p, miR-143-3p, miR-181b-1-3p, miR-183-5p, miR-329a-5p, miR-21-3p, miR-466i-5p, miR-412-5p, miR-122-3p, miR-125b, miR-210-5p, novel\_17, miR-26a-5p, miR-203-3p, miR-499a-3p, miR-3596, miR-378g, miR-7977, miR-211-5p, miR-4792, miR-452-3p, miR-20a-3p, miR-2319b, novel\_94, miR-96-5p, miR-129b-5p, miR-423-5p, miR-154a, miR-877-3p, miR-361-3p, miR-1296-5p, let-7i-3p, miR-181d-5p, novel\_60, miR-3059-5p, miR-3956-3p, miR-218-5p, miR-216a-3p, miR-411b-5p, miR-421, miR-2459, miR-181b-2-3p, miR-21b, miR-6529a, miR-2284r, miR-8485, miR-1b-5p, miR-30c-1-3p, miR-23a-3p, miR-33a-5p, miR-124a, miR-494-3p, miR-424-5p, miR-146b, miR-381-5p, miR-1468, miR-130b-3p, miR-505, miR-16b, miR-182-5p, miR-326, miR-1306-5p, miR-223-5p, miR-3957, miR-370-3p, miR-141-3p, miR-125a, miR-3957-5p, miR-874-3p, miR-7144-5p, miR-345-5p, let-7g-3p, miR-329b, miR-2318, miR-23b, miR-6128, miR-16-5p, miR-193a-5p, miR-134-5p, miR-204-5p, miR-331-3p, miR-125b-5p, miR-6740-5p, miR-1-5p, miR-5100, miR-134-5p, miR-322-5p, miR-1271-5p, miR-2411-5p, miR-128-3p, let-7a-2-3p, miR-885-3p, miR-1343-5p, miR-330-5p, miR-134, miR-3578, miR-3065-3p, miR-450b-5p, miR-4286, miR-3529-3p, miR-543-5p, miR-200a-3p, novel\_127, miR-17-3p, miR-1a-2-5p, miR-30c-2-3p, miR-217, miR-205-5p, miR-125a-3p, miR-

miR-3653-3p, miR-34b-5p, miR-221-5p, miR-21-3p, miR-466i-5p, miR-345-3p, miR-216c-5p, miR-2411, miR-376a-5p, miR-130a-5p, miR-1197-5p, miR-188-3p, miR-1193, miR-217-5p, miR-16-1-3p, miR-664-5p, miR-34a-5p, miR-378d, miR-493-3p, miR-941, miR-142-3p, miR-3600, miR-380-5p, miR-505-3p, miR-212-5p, miR-548e-3p, miR-532-3p, miR-328-3p, miR-148b-3p, miR-200b, miR-151-3p, miR-664a-5p, miR-665, miR-2285j, miR-129-5p, miR-874-5p, miR-208b-5p, miR-4492, miR-664a, miR-425-5p, miR-214, miR-3074-5p, miR-21a-3p, miR-885-3p, miR-186-5p, miR-370-5p, miR-296-3p, miR-182-5p, miR-221-5p, miR-504-5p, miR-548o-3p, novel\_32, miR-544-3p, miR-323b-3p, miR-182-5p, miR-214-3p, miR-3085-3p, miR-3955-3p, miR-101b-3p, miR-1839-3p, miR-4532, miR-323b, miR-30b-3p, miR-484, miR-2284r, miR-544a, miR-299a-5p, miR-1343-3p, miR-151a-3p, miR-216a-3p, miR-1185-3p, miR-2285y, miR-2285n, miR-2284q, miR-450a-5p, miR-1296-5p, novel\_111, miR-129b-5p, miR-544-5p, miR-504, miR-3064-5p, miR-1185-2-3p, miR-217, miR-2285af, miR-125a-3p, miR-200c, miR-152-3p, miR-127-5p, miR-191-3p, miR-200c-3p, miR-3064-5p, miR-4286, miR-29a-5p, miR-450c-5p, miR-380-5p, miR-200b-3p, miR-885-3p, miR-2285ad, miR-429-3p, miR-505-5p, miR-2411-5p, miR-144, miR-6740-5p, miR-410-5p, miR-370-5p, miR-2448-3p, miR-23a-5p, miR-671-5p, miR-485-5p, miR-10b-3p, miR-370-3p, miR-1271, miR-34c-5p, miR-197-5p, miR-378a-5p, miR-124-5p, miR-363-5p, let-7f-2-3p, let-7f-2-3p, miR-380-5p, miR-432-3p, miR-654-3p, miR-1843b-5p, miR-542-3p, miR-2113, miR-223-3p, miR-30b-3p, miR-16-1-3p, miR-187-3p, miR-194-3p, miR-544b, miR-3431, miR-34c, miR-382-5p, miR-6402, miR-22-5p, miR-3957-3p, miR-1839-3p, miR-1193, miR-758-5p, miR-449a, miR-24-3p, miR-148a-3p, miR-379-5p, miR-6395, miR-505-3p, miR-1291, miR-320b, miR-655-5p, miR-3074-5p, miR-34b, miR-380-5p, miR-6240, miR-106a-5p, miR-424-5p, miR-668-3p, let-7c-3p, miR-660, miR-214-3p, miR-105-5p, miR-330-3p, miR-16b, miR-106b-5p, miR-106a-5p, miR-17-5p, miR-99a-5p, miR-2284d, miR-3535, miR-455-3p, miR-216a-3p, miR-20b, miR-126a-5p, miR-330-3p, miR-105-1, miR-26b-3p, miR-16b, miR-16-1-3p, miR-101a-5p, miR-2426, miR-497-5p, miR-2284x, miR-4791, miR-3071-5p, miR-7705, novel\_120, novel\_60, miR-3956-3p, novel\_101, novel\_1, miR-379-3p, miR-502b, miR-15a, miR-6402, miR-101-3p, miR-20a-5p, miR-16a, miR-411b-3p, miR-144-3p, miR-99b-5p, miR-195a-5p, miR-3065-5p, miR-380-5p, miR-2284a, miR-20a, miR-30a-3p, miR-106a, miR-21-3p, miR-99a, miR-125a-3p, miR-618, miR-500a-5p, miR-322-5p, miR-758-5p, miR-15a-5p, miR-548e-3p, miR-106a, miR-30d-3p, miR-411-3p, miR-16-1-3p, miR-105-2, miR-99a-5p, miR-3578, miR-215-5p, miR-93, miR-3184-3p, miR-16-5p, miR-2330-3p, miR-214, miR-424-5p, novel\_63, miR-2332, miR-30e-3p, miR-144, miR-192-5p, miR-331-5p, miR-15b-5p, miR-660-5p, miR-548o-3p, miR-215-5p, let-7g-3p, miR-3074-1-3p, miR-20b-5p, miR-21a-3p, miR-2448-3p, miR-93-5p, miR-17-5p, miR-100-5p

JAM3

ENSOARGO(junction)

ZDHHC20

ENSOARGO(zinc fin)



miR-7977, miR-2319b, miR-3064-5p, miR-27a-3p, miR-129b-5p, miR-140-5p, miR-493-5p, miR-668-5p, miR-136-5p, miR-181a-3p, miR-96-5p, miR-885-5p, miR-212-3p, miR-3059-5p, miR-7705, miR-877-3p, miR-362-5p, miR-371a-5p, miR-101-3p, miR-218-5p, miR-2285n, miR-382-3p, miR-2284q, miR-3964, miR-374a-3p, miR-628-3p, miR-27a-3p, miR-145b, miR-181b-2-3p, miR-5010-3p, miR-330-3p, novel\_78, miR-500-5p, miR-455-3p, miR-1298-3p, miR-3962, miR-1a-3p, miR-296-5p, miR-6529a, miR-484, miR-1839-5p, miR-2426, miR-1388-5p, miR-33a-5p, miR-101b-3p, miR-106a-5p, miR-494-3p, miR-1388-3p, miR-124a, miR-182-5p, miR-106b-5p, miR-2957, miR-323b-3p, miR-1306-5p, miR-487b-5p, miR-3955-3p, miR-130b-3p, miR-3085-3p, miR-1185-5p, miR-532-5p, miR-182-5p, miR-221-5p, miR-140-5p, miR-2331-3p, miR-193b-3p, miR-192-5p, miR-301a-3p, miR-487b-5p, novel\_99, miR-543-3p, miR-625-5p, miR-339b, miR-345-5p, let-7g-3p, miR-3074-2-3p, miR-1271, miR-145a-3p, miR-338-3p, miR-6134, miR-206-3p, miR-224-5p, miR-338-5p, miR-324-3p, miR-2285j, miR-669a-3p, miR-454-3p, miR-487b-5p, miR-6516-3p, miR-3600, miR-106a, miR-548e-3p, miR-532-3p, novel\_83, miR-2284h-5p, miR-616-3p, miR-23c, miR-7859, miR-140-3p, miR-1197-5p, miR-188-3p, miR-1193, miR-124-3p, miR-215-5p, miR-2300b-3p, miR-34a-5p, miR-361-5p, miR-20a, miR-195a-3p, miR-2285w, miR-329a-5p, miR-183-5p, miR-380-3p, miR-2432, miR-2424, miR-181b-1-3p, miR-130a-5p, miR-664b-3p, miR-345-3p, miR-324-3p, miR-210-5p, miR-26a-5p, miR-1277-5p, miR-34b-5p, miR-221-5p, miR-202-5p, miR-106a, miR-3120-3p, miR-26b-5p, miR-181b-3p, miR-6535, miR-144-3p, miR-677, miR-411b-3p, miR-34b, miR-378b, miR-1306, miR-6516-3p, miR-2285x, miR-495-3p, miR-193b-3p, miR-3957-3p, miR-2285m, miR-2284w, miR-449a, novel\_27, miR-34c, miR-485-3p, miR-20a-5p, miR-142b, miR-502-5p, miR-147-5p, miR-656-5p, miR-22-5p, miR-206, miR-26b-3p, miR-130a, miR-3068-3p, miR-874-3p, miR-2331-3p, miR-545-3p, miR-3065-3p, miR-6516, miR-2448-3p, miR-2285c, miR-17-5p, miR-100-5p, miR-93-5p, miR-876-3p, let-7g-3p, novel\_48, miR-20b-5p, miR-625-5p, miR-3607-3p, miR-93, miR-34c-3p, miR-1-5p, miR-100-3p, miR-451a, novel\_74, miR-130b-5p, miR-874-5p, miR-485-3p, miR-6516-5p, miR-758-5p, miR-505-5p, miR-487a-3p, miR-2284h-5p, miR-2284z, miR-501-3p, miR-411-3p, miR-99a-5p, miR-105-2, miR-20a, miR-380-5p, miR-29a-5p, miR-3065-3p, miR-99a, novel\_17, miR-125a-3p, miR-8117, miR-6119-5p, miR-2285p, miR-3071-3p, miR-500a-5p, miR-21-3p, miR-452-3p, miR-3120-3p, miR-2483-3p, miR-2404, miR-3596, miR-500-3p, miR-6535, miR-2285ab, miR-129b-5p, miR-381-3p, miR-3065-5p, miR-99b-5p, miR-493-5p, miR-9851-3p, miR-335-3p, miR-541-3p, miR-1a-1-5p, miR-495-3p, miR-2285m, miR-502-3p, miR-20a-5p, miR-2285n, miR-105-1, miR-330-3p, miR-548w, miR-31-5p, miR-187-3p, miR-145b, miR-539-5p, miR-2285g, miR-153, miR-2285e, miR-20b, miR-149-5p, miR-9788-3p, miR-541, miR-145a-5p, miR-374b-3p, miR-323b, miR-501-3p, miR-197-3p, miR-2426, miR-2284aa, miR-21b, miR-493-5p, miR-6240, miR-106a-5p, miR-380-5p, miR-130b-5p, let-7c-3p, miR-2285r, miR-8485, miR-193a, miR-539-3p, miR-99a-5p, miR-106b-5p, miR-106a-5p, miR-17-5p, miR-330-3p, miR-323b-3p, miR-105-5p, miR-153-3p

miR-30a-3p, miR-409-3p, miR-15b-3p, miR-30e-3p, novel\_111, miR-3184-3p, miR-335-3p, miR-543-3p, miR-23a-5p, miR-493-5p, miR-378j, miR-203-3p, miR-877-5p, miR-154b-5p, miR-1185-2-3p, miR-331-5p, miR-2355-5p, miR-532-5p, miR-496-3p, miR-202-5p, miR-30f, miR-219b-5p, miR-182-5p, miR-1957a, miR-2424, miR-143-3p, miR-654-3p, miR-195a-3p, miR-30a-3p, miR-493-5p, miR-16-2-3p, miR-496, miR-101a-5p, miR-7857, miR-145a-5p, miR-23b-5p, miR-1185-3p, miR-30d-3p, miR-145b, miR-6517, miR-877-3p, miR-361-3p, miR-378e, let-7d-5p, miR-20a-3p, miR-450a-5p, miR-2284q, miR-30b-5p, miR-382-3p, miR-2285n, miR-371a-5p, miR-2285y, miR-219a-2-3p, miR-541-3p, novel\_60, miR-3059-5p, miR-452-5p, miR-378c, miR-2284aa, miR-378b, miR-6529a, miR-7857, miR-142-3p, miR-216a-3p, miR-9788-3p, let-7e, miR-2957, miR-758-3p, miR-491-3p, miR-193a, let-7a-5p, miR-33a-5p, miR-30f, miR-582-5p, miR-139-5p, novel\_25, miR-378a-3p, miR-21-3p, miR-17-3p, miR-708-5p, miR-19b-1-5p, miR-206-3p, let-7b-5p, miR-145a-3p, miR-378c, miR-1197-5p, miR-188-3p, miR-124-3p, miR-2904, miR-222-5p, miR-532-3p, miR-548e-3p, miR-3600, miR-2284m, miR-21-3p, miR-30d, miR-125b, miR-2432, miR-216c-5p, miR-135b-5p, miR-6516-3p, miR-2387, miR-378b, miR-670-3p, miR-378b, novel\_1, miR-502b, miR-22-5p, let-7i, miR-382-5p, miR-33a-3p, miR-24-3p, miR-3959-3p, miR-323c, miR-211, miR-135a-2-3p, novel\_120, miR-17-3p, miR-219a-1-3p, miR-380-3p, miR-2284ab, miR-2889, miR-455-5p, miR-1285, miR-653, let-7g-5p, miR-503-5p, miR-130a-3p, miR-125a-5p, miR-503-5p, miR-224-5p, miR-455-5p, miR-197-5p, miR-654-3p, miR-382, let-7g-3p, miR-10b-3p, miR-1814c, miR-485-5p, miR-3074-1-3p, miR-503-3p, miR-381-3p, miR-365a-3p, miR-154b-5p, miR-204-5p, miR-28-5p, miR-410-3p, miR-135a-1-3p, miR-2332, miR-135a-5p, miR-323-3p, miR-378c, miR-3607-3p, miR-6128, miR-300, let-7d, miR-582-3p, let-7a-2-3p, miR-128-3p, miR-30a-5p, miR-378h, miR-302a-5p, miR-545-5p, miR-17-3p, miR-543-5p, miR-2397-5p, miR-2285af, miR-181c-3p, let-7c-5p, miR-28b, miR-1271-3p, miR-2284a, miR-1, miR-1983, miR-335-3p, miR-140-5p, miR-381-3p, miR-499a-3p, miR-1185-2-3p, miR-203-3p, miR-2319b, miR-139-5p, miR-2284g, miR-211-5p, miR-2285u, miR-490-5p, miR-2440, miR-218-5p, miR-877-3p, miR-361-3p, miR-885-5p, miR-3956-3p, miR-9-5p, miR-1388-5p, miR-1839-5p, miR-541, miR-758-3p, miR-1a-3p, miR-147a, miR-149-5p, miR-592, novel\_9, miR-4726-5p, miR-665, miR-324-3p, miR-331-3p, miR-615, miR-101-3p, miR-2285m, miR-326-3p, miR-8095, miR-145-3p, miR-361-3p, miR-495-3p, miR-3184-3p, miR-1291, miR-18a-3p, miR-129b-3p, miR-27b-5p, miR-148a-3p, miR-3141, miR-381-3p, miR-361-3p, miR-21a-3p, miR-3120-3p, miR-541-5p, miR-221-5p, novel\_127, miR-21-3p, miR-152-3p, miR-221-5p, miR-200c-3p, miR-466i-5p, miR-3141, miR-330-3p, miR-219b-5p, miR-200c, miR-326, miR-2285p, novel\_39, miR-142a-3p, miR-2330-5p, miR-6240, miR-382-3p, miR-361-5p, miR-200b-3p, miR-300, miR-23b-5p, miR-330-5p, miR-193b-5p, miR-1290, miR-3591-5p, miR-615-3p, miR-296-5p, miR-194-3p, miR-148b-3p, miR-142-3p, miR-200b, miR-212-5p, miR-429-3p, miR-330-3p, miR-18a-3p

miR-199b-3p, miR-330-3p, miR-409b, miR-27a-3p, miR-181b-2-3p, miR-222-5p, miR-1298-3p, miR-455-3p, miR-296-5p, miR-323b, miR-3120-5p, miR-2284aa, miR-101b-3p, miR-382-3p, miR-124a, miR-23a-3p, miR-2310, miR-4532, miR-29b-1-5p, miR-323b-3p, miR-3085-3p, miR-491-5p, miR-199b-5p, miR-10b, miR-3064-5p, miR-7977, miR-3082-5p, miR-7857-3p, miR-4443, miR-27a-3p, miR-199b-5p, miR-361-3p, miR-140-5p, miR-668-5p, miR-212-3p, miR-361-3p, miR-219a-2-3p, miR-2285n, miR-2285y, miR-371a-5p, miR-30d-3p, miR-23c, miR-23b-3p, miR-2284h-5p, miR-2300b-3p, miR-217-5p, miR-5703, miR-124-3p, miR-133a-3p, miR-2285w, miR-345-3p, miR-369-3p, miR-125b-2-3p, miR-181b-1-3p, miR-664b-3p, miR-29b-1-5p, miR-2285p, miR-345-3p, miR-500a-5p, miR-202-5p, miR-3653-3p, miR-660-5p, miR-140-5p, miR-370-5p, miR-216b-3p, miR-216b-5p, miR-193b-3p, miR-377-3p, miR-655, miR-27b-5p, miR-18a-5p, miR-133b-3p, miR-539-5p, miR-346, miR-224-5p, miR-6525, miR-338-3p, miR-30e-3p, miR-15b-3p, miR-664a-5p, miR-29b-2-5p, miR-655-3p, miR-665, miR-219b-3p, miR-30a-3p, miR-17-3p, miR-3955-5p, miR-665, miR-412-5p, miR-194-3p, miR-1285, miR-1434-3p, miR-7b-5p, miR-1260b, miR-27b-3p, miR-6240, miR-2284l, miR-377-3p, miR-224-5p, miR-7-5p, miR-2411-3p, miR-365b-5p, miR-330-3p, miR-124-5p, miR-193a-3p, miR-660, miR-1343-5p, miR-320b, miR-655-5p, miR-181b-3p, miR-677, miR-18b, miR-2387, miR-378b, miR-135b-5p, miR-135a-2-3p, novel\_101, miR-17-3p, miR-1193, miR-193b-3p, miR-371b-3p, miR-199b-5p, miR-374c-5p, miR-4324, miR-6119-3p, miR-199c, miR-502b, miR-6517, miR-2285ad, miR-18b-5p, miR-196a-2-3p, miR-2284z, miR-345-3p, miR-1343-5p, miR-30a-3p, miR-3064-5p, miR-29b-2-5p, miR-450b-5p, miR-199a-5p, miR-219-3p, miR-1260a, miR-217, miR-127-5p, miR-450a-2-3p, miR-17-3p, novel\_96, miR-1271, miR-370-3p, miR-2355-5p, miR-100a-5p, miR-201, miR-22b, miR-18a, miR-1814c, miR-485-5p, miR-361-3p, miR-140-5p, miR-150-5p, miR-2285k, miR-3074-5p, miR-378b, miR-4792, miR-2284g, miR-126b-5p, miR-26b-5p, miR-146b-3p, miR-27a-3p, miR-6123, miR-22-5p, miR-194b-5p, miR-17-3p, miR-452-5p, miR-361-3p, miR-301b-3p, miR-2284w, miR-326-3p, miR-7b-5p, miR-484, miR-30b-3p, miR-194-5p, miR-450b-5p, miR-1260b, miR-30b-3p, miR-455-5p, miR-27b-3p, miR-27a-3p, miR-130a-3p, miR-5010-3p, miR-147a, miR-148b-5p, miR-149-5p, novel\_103, miR-582, miR-326, miR-7-5p, miR-455-5p, miR-194a, miR-130b-3p, miR-3955-3p, miR-452-5p, miR-30c-1-3p, miR-503-3p, miR-21a-3p, miR-3154, miR-129b-3p, novel\_91, miR-30c-1-3p, miR-140-5p, miR-296-3p, miR-552-3p, miR-3065-3p, miR-6130, miR-301a-3p, novel\_32, miR-30e-3p, miR-320e, miR-30a-3p, miR-17-3p, miR-486b-3p, miR-454-3p, miR-874-5p, miR-3432a, miR-129-5p, miR-4492, miR-4510, miR-145a-3p, miR-3074-5p, miR-1260b, miR-6134, miR-2366, miR-330-5p, miR-5703, miR-2904, miR-148a-5p, miR-133a-3p, miR-30d-3p, miR-1b-3p, miR-2411-5p, miR-26a-5p, miR-1260a, miR-185-3p, miR-92a-1-5p, miR-30c-2-3p, miR-191-3p, miR-6536, miR-17-3p, miR-21-3p, miR-1277-5p, miR-30a-3p, miR-2285i, miR-450b-5p, miR-490-3p, miR-2284a, miR-2284y, miR-2411, miR-3065-3p, miR-486-3p

miR-296-5p, miR-10b, miR-301b-5p, miR-7857, miR-323b, miR-30b-3p, miR-544a, miR-21b, miR-16-2-3p, miR-199b-3p, miR-1343-3p, novel\_4, miR-2300a-5p, miR-151a-3p, miR-548w, miR-5010-3p, miR-539-5p, miR-1298-3p, miR-142-5p, miR-216a-3p, miR-9788-3p, miR-455-3p, miR-320b, novel\_115, miR-1306-5p, miR-431-5p, miR-326, miR-29b-1-5p, miR-323b-3p, miR-3085-3p, miR-487b-5p, miR-146b, miR-382-3p, miR-676-3p, miR-8485, miR-193a, miR-504, miR-136-5p, miR-1983, miR-4792, miR-664b, miR-3064-5p, miR-452-3p, miR-541-5p, miR-211-5p, miR-2483-3p, miR-203-3p, miR-382-3p, miR-101-3p, miR-301a-5p, miR-4726-5p, miR-490-5p, miR-2284q, miR-2447, miR-3059-5p, miR-181d-5p, miR-423-5p, miR-8095, miR-1246, miR-376a-5p, miR-140-3p, miR-1197-5p, miR-217-5p, miR-5703, miR-4429, miR-218-1-3p, miR-1b-3p, miR-3600, miR-380-5p, miR-200b, novel\_83, miR-328-3p, miR-210-5p, miR-3601, miR-216a-5p, miR-345-3p, miR-320d, miR-30b-3p, miR-2484, miR-299-3p, miR-195a-3p, miR-29b-1-5p, miR-146a-5p, miR-2432, miR-3613-5p, miR-500a-3p, miR-129b-3p, miR-411, let-7g-3p, novel\_99, miR-186-5p, miR-504-5p, miR-3065-3p, miR-21-3p, miR-552-3p, miR-10a, miR-544-3p, miR-2284s, miR-582-5p, miR-323-5p, miR-204-3p, miR-151-3p, miR-324-3p, miR-665, miR-320e, novel\_74, miR-487b-5p, miR-6516-3p, miR-17-3p, miR-4492, miR-500, miR-130b-5p, miR-539-5p, miR-433-5p, miR-145a-3p, miR-425-5p, miR-10b-5p, miR-142a-5p, miR-3184-5p, miR-181c-5p, miR-181a-5p, miR-197-3p, novel\_23, miR-30b-3p, miR-29b, miR-21-5p, miR-188-5p, miR-455-5p, miR-544b, miR-146a, novel\_51, miR-2411-3p, miR-455-5p, miR-452-5p, miR-466f-3p, miR-130b-5p, miR-668-3p, miR-432-3p, miR-654-3p, miR-2285r, miR-432-3p, let-7a-2-3p, miR-1306, miR-216a-3p, miR-21c, miR-3591-3p, miR-378b, miR-1291, miR-412-3p, miR-146b-5p, miR-6395, miR-6516-3p, miR-379-5p, miR-3120-3p, miR-10a-5p, miR-323a-5p, miR-200b-3p, miR-20a-3p, miR-670-3p, miR-29b-1-5p, miR-7689-3p, miR-3960, miR-485-5p, miR-4508, miR-664a, miR-30b-3p, miR-30b-3p, miR-29b-1-5p, miR-409-5p, miR-374a-3p, novel\_87, miR-181c-5p, miR-6134, miR-374a-3p, miR-6527, miR-190b-5p, miR-194b-5p, miR-181d-5p, miR-1306-5p, miR-3074-1-3p, miR-335-3p, miR-1827, miR-433-3p, miR-21a-3p, miR-1185-2-3p, miR-3956, miR-664b, miR-378b, miR-181b-5p, miR-194a, miR-664-3p, miR-376a-5p, miR-218-1-3p, miR-2284ab, miR-218-2-3p, miR-7857, miR-194-5p, miR-3578, miR-181a-5p, miR-1185-3p, miR-2284d, miR-3535, novel\_4

|         |                    |                                                                                                                                                                                                                                                                                                                                                                                                                                                                                                                                                                                                                                                                                                                                                                                                                                                                                                                                                                                                                                                                |
|---------|--------------------|----------------------------------------------------------------------------------------------------------------------------------------------------------------------------------------------------------------------------------------------------------------------------------------------------------------------------------------------------------------------------------------------------------------------------------------------------------------------------------------------------------------------------------------------------------------------------------------------------------------------------------------------------------------------------------------------------------------------------------------------------------------------------------------------------------------------------------------------------------------------------------------------------------------------------------------------------------------------------------------------------------------------------------------------------------------|
| NAA15   | ENSOARGO(N(alpha)) | miR-1285-5p, novel_27, novel_120, miR-1a-1-5p, novel_101, miR-194b-5p, miR-2284j, miR-22-5p, miR-147-5p, miR-2284q, miR-499a-3p, miR-27a-3p, miR-2284g, miR-329-5p, miR-376a-2-5p, miR-6516-3p, miR-148a-3p, miR-3591-3p, miR-216a-3p, let-7j, miR-23a-3p, miR-33a-5p, miR-2284b, miR-214-3p, miR-1468, miR-362-3p, miR-194a, miR-2284d, miR-6238, miR-544b, miR-31-5p, miR-548w, miR-27a-3p, miR-362-3p, miR-544a, miR-2284x, miR-27b-3p, miR-3120-5p, miR-329-3p, miR-2113, miR-374b-3p, miR-194-5p, miR-28a-3p, miR-2284v, miR-214, miR-1468-5p, miR-2284k, miR-1-5p, miR-544-3p, miR-582-5p, miR-499b-3p, miR-656-3p, miR-133c, miR-2284n, miR-3068-3p, miR-370-3p, miR-21-3p, miR-1271, miR-329b, miR-329a, novel_48, miR-582-5p, novel_99, miR-488-3p, miR-21a-3p, miR-424-3p, miR-23b, miR-411, miR-148b-5p, miR-2284y, miR-200a, miR-2284a, miR-216c-5p, miR-329a-5p, miR-28-3p, miR-2284m, miR-202-5p, miR-1a-2-5p, miR-152-3p, miR-216a-5p, miR-23b-3p, miR-23c, miR-148b-3p, miR-582-3p, miR-376a-5p, miR-128-3p, miR-2284u, miR-362-3p, miR-23b-5p |
| VRK3    | ENSOARGO(vaccinia) | miR-7705, miR-2424, miR-214, miR-21-3p, miR-1827, miR-214-3p, miR-21-5p, miR-21c<br>miR-133b-5p, miR-2300a-5p, miR-181b-2-3p, miR-6130, miR-582-3p, miR-134-5p, miR-677, miR-181b-3p, miR-6529a, miR-134, miR-                                                                                                                                                                                                                                                                                                                                                                                                                                                                                                                                                                                                                                                                                                                                                                                                                                                 |
| RUNDC3B | ENSOARGO(RUN doma) | 758-3p, miR-1248, novel_60, miR-4510, miR-3956-3p, miR-181a-2-3p, miR-181b-1-3p, miR-758-3p, miR-133a-5p, miR-210-5p, miR-760-3p, miR-134-5p                                                                                                                                                                                                                                                                                                                                                                                                                                                                                                                                                                                                                                                                                                                                                                                                                                                                                                                   |

miR-129b-5p, miR-199b-5p, miR-541-5p, miR-10b, miR-20a-3p, miR-3064-5p, miR-2285y, miR-2285n, miR-382-3p, miR-2285t, miR-3958-3p, miR-181d-5p, miR-1296-5p, miR-154a, miR-125b-2-3p, miR-30b-3p, miR-484, miR-105-1, novel\_4, miR-2300a-5p, miR-409b, miR-9788-3p, miR-221-3p, miR-320b, miR-3955-3p, miR-3085-3p, miR-376b, miR-494-3p, miR-382-3p, miR-424-5p, miR-18a-5p, let-7g-3p, miR-532-5p, miR-21-3p, miR-3065-3p, miR-221-5p, miR-140-5p, miR-204-3p, miR-139-5p, miR-29b-2-5p, miR-19b-1-5p, miR-222-3p, miR-424-5p, miR-208b-5p, miR-6516-3p, miR-188-3p, miR-5703, miR-2904, miR-376a-5p, novel\_133, let-7a-3p, miR-4429, miR-3600, novel\_83, miR-148b-3p, miR-340-5p, miR-200b, miR-15a-5p, miR-383-5p, miR-196a-3p, miR-299-3p, miR-21-3p, miR-221-5p, miR-1277-5p, miR-760-3p, miR-320d, miR-216c-5p, miR-125b-2-3p, miR-130a-5p, miR-378b, miR-2387, miR-18b, miR-195a-5p, miR-107, miR-2285k, miR-320b, miR-382-5p, miR-33a-3p, miR-16a, miR-6402, miR-15a, miR-502-5p, novel\_1, miR-2285x, miR-24-3p, miR-3071-5p, miR-145a-5p, miR-181a-5p, miR-873a-5p, miR-30b-3p, miR-26b-3p, miR-130a-3p, miR-103, miR-185-5p, miR-330-3p, miR-452-5p, miR-363-5p, miR-130b-5p, miR-345-5p, miR-18a, miR-320a, miR-503-3p, miR-488-3p, miR-23a-5p, let-7g-3p, miR-199a-5p, miR-331-3p, miR-144, miR-5100, miR-135a-1-3p, miR-34c-3p, miR-1-5p, miR-410-3p, miR-10b-3p, miR-323-3p, miR-3578, let-7a-2-3p, miR-200b-3p, miR-105-2, miR-411-3p, miR-222, miR-214-5p, miR-545-5p, miR-582-3p, miR-24-2-5p, miR-302a-5p, miR-217, miR-200c, miR-2285af, miR-107, miR-200c-3p, miR-181b-5p, miR-2898, miR-30a-3p, miR-29b-2-5p, miR-1271-3p, miR-199a-5p, miR-3065-3p, miR-24-2-5p, miR-381-3p, miR-221, miR-140-5p, miR-493-5p, miR-335-3p, miR-2319b, miR-2284g, miR-139-5p, miR-24-1-5p, miR-203-3p, miR-199a-3p, miR-101-3p, miR-3064, miR-628-3p, miR-199a-5p, miR-432-3p, miR-376c-5p, miR-376b-5p, miR-30b-3p, miR-1343-5p, novel\_17, miR-324-3p, miR-328-3p, miR-486-5p, miR-27a-3p, miR-29b, miR-378d, miR-6239, miR-27b-3p, miR-218-2-3p, miR-29d-3p, miR-1343-5p, miR-361-3p, miR-29c-3p, let-7i-3p, miR-29a, miR-767-5p, miR-6119-3p, miR-874-5p, miR-29b-3p, miR-331-3p, miR-324-3p, miR-29a-3p, miR-3596, miR-27a-3p, miR-324-5p, miR-4792, miR-7-1-3p, miR-1291, miR-767, miR-6395, miR-9851-3p, miR-361-3p, miR-129b-5p, miR-3065-5p

NAF1

ENSOARGO(nuclear

ADCK5

ENSOARGO(aarF dom

miR-105-2, miR-345-3p, miR-3578, miR-2427, miR-29d-3p, miR-1343-5p, miR-330-5p, miR-483-3p, miR-129-1-3p, miR-299a-3p, miR-423-3p, miR-2898, novel\_96, novel\_127, miR-1260a, miR-205-5p, miR-3065-3p, miR-876-3p, miR-345-5p, miR-7144-5p, miR-20b-5p, miR-301, miR-93-5p, miR-17-5p, miR-374c-3p, miR-324-5p, miR-154b-5p, miR-874-3p, miR-370-3p, miR-615-5p, miR-1271, miR-29b-3p, miR-370-5p, miR-93, miR-1197-3p, miR-1260b, miR-29b, miR-1260b, miR-27b-3p, miR-7862, miR-873a-5p, miR-432, miR-1843b-5p, miR-22-3p, miR-3071-5p, miR-432-5p, miR-149-5p, miR-544b, miR-2355-3p, miR-20b, miR-483-3p, miR-378a-5p, miR-1343-5p, miR-377-3p, miR-105-5p, novel\_51, miR-106a-5p, miR-17-5p, miR-2411-3p, miR-345-5p, miR-363-5p, miR-1306, miR-18a-3p, miR-323a-5p, miR-146b-3p, miR-374c-3p, miR-29a-3p, miR-299b-3p, miR-378b, miR-29a, miR-502b, miR-147-5p, miR-4324, miR-20a-5p, miR-326-3p, miR-2285m, novel\_101, miR-1193, miR-29c-3p, miR-941, miR-378d, miR-2300b-3p, miR-2904, miR-140-3p, miR-1197-5p, miR-222-5p, miR-532-3p, miR-18a-3p, miR-106a, miR-106a, miR-466i-5p, miR-760-3p, miR-30b-3p, miR-299-3p, miR-345-3p, miR-130a-5p, miR-20a, miR-345-5p, miR-500a-3p, miR-129b-3p, miR-544-3p, miR-377-3p, miR-2284s, miR-323-5p, novel\_32, miR-22-3p, miR-877-5p, miR-140-5p, miR-2331-3p, miR-504-5p, miR-370-5p, miR-3065-3p, miR-500, miR-665, miR-3184-5p, miR-129-2-3p, miR-665-5p, miR-544a, miR-2284r, miR-301b-5p, miR-147a, miR-105-1, miR-27a-3p, miR-491-5p, miR-326, novel\_103, miR-1306-5p, miR-106b-5p, miR-193a, miR-8485, miR-106a-5p, miR-504, miR-877-3p, miR-361-3p, miR-3082-5p, miR-2483-3p, miR-203-3p, miR-27a-3p, miR-7977, miR-301a-5p, miR-361-3p, miR-423-5p, miR-7705, novel\_60, miR-3956-3p, miR-212-3p, miR-6527

miR-1291, miR-19a-3p, miR-668-5p, miR-378f, miR-6395, miR-3141, miR-129b-5p, miR-146b-3p, miR-378e, miR-3064-5p, miR-10b, miR-3120-3p, miR-128-1-5p, miR-628-3p, miR-4726-5p, miR-4324, miR-371a-5p, miR-107-5p, miR-371b-3p, miR-2428, miR-193b-3p, miR-1193, miR-30b-3p, miR-378c, miR-3120-5p, miR-378b, miR-2284r, miR-542-3p, miR-30b-3p, miR-147a, miR-105-1, novel\_4, miR-3085-3p, miR-125a-5p, miR-193a-3p, miR-103a-2-5p, novel\_103, miR-105-5p, novel\_19, miR-3141, miR-378d, miR-432-3p, miR-4532, miR-6130, miR-193b-3p, miR-378a-3p, miR-370-5p, miR-125a, miR-664a, miR-486b-3p, miR-370-5p, miR-125b-5p, miR-331-3p, miR-1197-3p, miR-378c, miR-378c, novel\_42, miR-4510, miR-193a-5p, miR-665-5p, miR-19b-3p, miR-105-2, novel\_133, miR-378i, miR-2366, miR-378a-3p, miR-378h, miR-328-3p, miR-543-5p, miR-125b, miR-422a, miR-185-3p, miR-486-3p, miR-3064-5p, miR-4286

TUBA8 ENSOARGO( tubulin,

HAGHL ENSOARGO( hydroxya

miR-758-3p, miR-2330-5p, miR-124a, miR-103a-2-5p, miR-106b-3p, miR-130b-3p, miR-2411-3p, novel\_51, miR-2331-5p, miR-197-5p, miR-320b, miR-199a-3p, miR-224-5p, miR-194-3p, miR-411-5p, miR-142-3p, miR-134-3p, miR-665, miR-1343-3p, novel\_4, miR-151a-3p, miR-26a-2-3p, miR-758-3p, miR-2428, miR-301b-3p, miR-8095, miR-24-3p, miR-9-5p, miR-1193, miR-2285f, miR-107-5p, miR-371a-5p, miR-2285y, miR-320c, miR-146b-3p, miR-378g, miR-499b-5p, miR-541-5p, miR-452-3p, miR-335-3p, miR-9851-3p, miR-19a-3p, miR-378b, miR-2285ab, miR-29a-5p, miR-142a-3p, miR-376a-5p, miR-320d, miR-345-3p, miR-210-5p, miR-214-5p, miR-134-5p, miR-199a-3p, miR-222-5p, miR-9-5p, miR-30d-3p, miR-2285ad, miR-378d, miR-582-3p, miR-19b-3p, miR-33b-3p, miR-142-3p, miR-4429, miR-5703, miR-1197-5p, miR-124-3p, miR-134, miR-2366, miR-1290, miR-193b-5p, miR-345-3p, miR-122-5p, miR-224-5p, miR-193a-5p, miR-4510, miR-145a-3p, miR-134-5p, miR-4492, miR-454-3p, novel\_9, novel\_74, miR-151-3p, miR-132-5p, miR-100-3p, miR-30a-3p, miR-370-5p, miR-30e-3p, miR-6130, miR-216b-5p, miR-365a-3p, miR-301a-3p, miR-370-5p, miR-485-5p, miR-1248, miR-671-5p, miR-2312, miR-411, miR-320a, miR-21a-3p, miR-488-3p

miR-133b-5p, miR-330-3p, miR-181b-2-3p, miR-377-5p, miR-194-3p, miR-1185-3p, miR-126a-5p, miR-20b, miR-2113, miR-1434-3p, miR-450c-3p, novel\_23, miR-450b-5p, miR-2284x, miR-6240, miR-106a-5p, miR-493-5p, miR-668-3p, miR-330-3p, miR-190a, miR-106b-5p, miR-106a-5p, miR-17-5p, miR-124-5p, miR-3955-3p, miR-655-5p, miR-677, miR-181b-3p, miR-1185-2-3p, miR-376b-5p, miR-3591-3p, miR-381-3p, miR-378b, miR-136-5p, miR-335-3p, miR-493-5p, miR-877-3p, miR-1a-1-5p, miR-2285x, miR-190b-5p, novel\_27, miR-154a, miR-219a-2-3p, miR-3613, miR-20a-5p, miR-769-5p, miR-147-5p, miR-106a, miR-302a-5p, miR-222-5p, miR-450a-1-3p, miR-129-1-3p, miR-193b-5p, miR-2300b-3p, miR-3578, miR-23b-5p, miR-1197-5p, miR-155-5p, miR-20a, miR-376a-5p, miR-181b-1-3p, miR-376c-3p, miR-377-5p, miR-200a, miR-29a-5p, miR-486-3p, miR-2285b, miR-125a-3p, miR-219-3p, miR-30f, miR-92a-1-5p, miR-202-5p, miR-106a, miR-466i-5p, miR-1a-2-5p, miR-1277-5p, miR-3653-3p, miR-200a-3p, miR-545-3p, miR-574-5p, miR-21-3p, miR-141-3p, miR-296-3p, miR-376e-3p, miR-582-5p, miR-331-5p, miR-769, novel\_32, miR-376c-3p, miR-155-5p, miR-301, miR-450a-1-3p, miR-3613-5p, miR-93-5p, miR-376c-5p, miR-411, miR-17-5p, miR-487b-5p, miR-376c-5p, miR-3074-1-3p, miR-23a-5p, miR-20b-5p, miR-582-5p, miR-129-2-3p, miR-3607-3p, miR-6128, miR-93, miR-769-5p, miR-122-5p, miR-1-5p, miR-2285j, miR-494-5p, miR-219b-3p, miR-450b-3p, miR-155-5p, miR-190a-5p, miR-486b-3p

FADS1 ENSOARGOC fatty ac

TMEM244 ENSOARGOC transmem



miR-655-5p, miR-670-3p, miR-29a-3p, miR-146b-3p, miR-21c, miR-18a-3p, miR-2285ab, miR-195a-5p, miR-6516-3p, miR-342-3p, miR-33a-3p, miR-16a, miR-502-5p, miR-15a, miR-502b, miR-656-5p, miR-22-5p, miR-203b-5p, novel\_1, miR-26b-3p, miR-133b-5p, miR-187-3p, miR-185-5p, miR-3071-5p, miR-455-5p, miR-138, miR-29b, miR-30b-3p, miR-345-5p, miR-539-3p, miR-455-5p, miR-99a-5p, miR-224-5p, miR-452-5p, miR-2285l, miR-124-5p, miR-141-3p, miR-370-3p, miR-324-5p, miR-769, miR-3154, miR-320a, miR-100-5p, miR-381-3p, miR-671-5p, miR-485-5p, miR-3074-1-3p, miR-6128, miR-1306-5p, miR-145-3p, miR-331-3p, miR-99b-3p, miR-551b-3p, miR-34c-3p, miR-29b-3p, miR-28-5p, miR-486b-3p, miR-138-5p, miR-196a-2-3p, miR-483-3p, miR-501-3p, miR-29d-3p, miR-134, miR-105-2, miR-200b-3p, miR-128-3p, miR-99a-5p, miR-300, miR-4286, miR-29b-2-5p, miR-3529-3p, miR-1271-3p, miR-3065-3p, miR-30c-2-3p, miR-6119-5p, miR-99a, miR-200c, miR-2285af, miR-200c-3p, miR-7977, miR-27a-3p, miR-3082-5p, miR-129b-5p, miR-361-3p, novel\_94, miR-877-3p, miR-2285f, miR-212-3p, miR-3059-5p, miR-4454, miR-502-3p, miR-107-5p, miR-769-5p, miR-2285y, miR-27a-3p, miR-409b, miR-105-1, novel\_4, miR-2300a-5p, miR-30b-3p, miR-412-3p, miR-484, miR-6529a, miR-3120-5p, miR-2426, miR-33a-5p, miR-424-5p, miR-491-3p, miR-758-3p, miR-3187-3p, miR-30c-1-3p, miR-362-3p, miR-1306-5p, miR-320b, miR-342, miR-3065-3p, miR-21-3p, miR-140-5p, miR-155-5p, miR-22-3p, miR-204-3p, miR-21a-3p, novel\_99, miR-3074-2-3p, miR-145a-3p, miR-6134, miR-206-3p, miR-29b-2-5p, miR-320e, miR-132-5p, miR-324-3p, miR-19b-1-5p, miR-708-5p, miR-424-5p, miR-208b-5p, miR-155-5p, miR-6516-3p, miR-485-3p, miR-3600, novel\_83, miR-616-3p, miR-148b-3p, miR-15a-5p, miR-200b, miR-222-5p, miR-487a-3p, miR-1197-5p, miR-188-3p, miR-140-3p, miR-1193, miR-2901, miR-362-3p, miR-2300b-3p, miR-376a-5p, novel\_133, let-7a-1, miR-129-2-3p, miR-539-5p, miR-3074-2-3p, miR-1271, miR-2903, miR-410-5p, miR-551b-3p, miR-29b-3p, miR-132-5p, miR-767-5p, miR-664a, miR-486b-3p, miR-4492, miR-221-5p, miR-30c-1-3p, miR-182-5p, miR-3065-3p, miR-2355-5p, miR-370-3p, miR-132-5p, miR-199a-5p, miR-424-3p, miR-3154, miR-27b-5p, miR-767, miR-1827, miR-1248, miR-485-5p, miR-885-3p, miR-3529-3p, miR-181a-2-3p, miR-4286, miR-199a-5p, miR-200a, miR-3065-3p, miR-486-3p, miR-210-5p, miR-200c, miR-185-3p, miR-30c-2-3p, miR-200c-3p, miR-2898, miR-21-3p, novel\_96, miR-221-5p, miR-6517, miR-429-3p, miR-200b, miR-1271-5p, miR-505-5p, miR-328-3p, miR-129-1-3p, miR-532-3p, miR-330-5p, miR-1343-5p, miR-29d-3p, miR-941, miR-885-3p, miR-200b-3p, miR-105-2, miR-335-5p, miR-4454, miR-452-5p, miR-29c-3p, miR-6527, miR-323c, miR-361-3p, miR-199b-5p, miR-2284w, miR-326-3p, novel\_82, miR-33a-3p, miR-335, miR-29a, miR-4726-5p, miR-128-1-5p, miR-203b-5p, miR-411b-3p, miR-29a-3p, novel\_69, miR-378g, miR-4443, miR-652-3p, miR-199b-5p, miR-361-3p, miR-1306, miR-1291, miR-96-5p, miR-6395, miR-2330-5p, miR-744-3p, let-7c-3p, miR-30c-1-3p, miR-4532, let-7j, novel\_103, miR-1306-5p, miR-326, miR-7-5p, miR-182-5p, novel\_51, miR-105-5p, miR-491-5p, miR-199b-5p, miR-1343-5p, miR-105-1, novel\_78, miR-145b, miR-134-3p, miR-185-5p, miR-7b-5p, miR-30b-3p, miR-145a-5p, miR-30b-3p, miR-29b, miR-7862

miR-652b, miR-224-5p, miR-874-5p, miR-454-3p, miR-190a-5p, miR-15b-3p, miR-30e-3p, miR-30a-3p, miR-151-3p, miR-376e-3p, miR-2284s, miR-377-3p, miR-582-5p, miR-301a-3p, miR-15b-5p, miR-2331-3p, miR-216b-3p, miR-339b, miR-299, miR-129b-3p, miR-376a-5p, miR-664b-3p, miR-181b-1-3p, miR-376c-3p, miR-202-5p, novel\_17, miR-219b-5p, miR-324-3p, miR-92a-1-5p, miR-106a, miR-30d-3p, miR-184-3p, miR-33b-3p, miR-133a-3p, miR-16-1-3p, miR-2366, miR-1285-5p, miR-2447, miR-3956-3p, miR-190b-5p, miR-3968, miR-490-5p, miR-1843a-3p, novel\_82, miR-101-3p, miR-2440, miR-301a-5p, miR-25, miR-203-3p, miR-144-5p, miR-24-1-5p, miR-211-5p, miR-3963, miR-136-5p, miR-1983, miR-544-5p, miR-140-5p, miR-8485, miR-2310, miR-1388-3p, miR-101b-3p, miR-130b-3p, miR-146b, miR-199b-5p, miR-103a-2-5p, miR-29b-1-5p, miR-505, miR-16b, miR-182-5p, miR-106b-5p, miR-147a, miR-455-3p, miR-2459, miR-1343-3p, novel\_78, miR-145b, miR-181b-2-3p, miR-1388-5p, miR-101c, miR-301b-5p, miR-541, novel\_42, miR-16-5p, miR-144-5p, novel\_9, miR-134-5p, miR-331-5p, miR-223-5p, miR-376c-3p, miR-767, miR-329b, miR-20b-5p, miR-424-3p, miR-93-5p, miR-200a, miR-127-5p, miR-200a-3p, miR-152-3p, miR-205-5p, miR-125a-3p, miR-322-5p, miR-134-5p, novel\_121, miR-6517, novel\_79, miR-155-5p, miR-1343-5p, miR-301b-3p, miR-199b-5p, miR-4324, miR-142b, miR-374c-3p, miR-144-3p, miR-669, miR-181b-3p, novel\_68, miR-329-5p, miR-216b-3p, miR-412-3p, miR-2319a, miR-146b-5p, miR-148a-3p, miR-3591-3p, miR-216a-3p, miR-432-3p, miR-432-3p, miR-503-3p, miR-380-5p, miR-668-3p, miR-628-5p, miR-378a-5p, miR-377-3p, miR-146a, miR-365b-5p, miR-412-5p, novel\_116, miR-194-3p, miR-149-5p, miR-103a-3p, miR-339-5p, miR-16b, miR-16-1-3p, miR-26a-2-3p, miR-497-5p, miR-27b-3p, miR-188-5p, miR-19b-2-5p, miR-708-3p, miR-2113, miR-197-3p, miR-22-3p, novel\_23, miR-530-5p, miR-145a-3p, miR-3074-2-3p, miR-

ALB

ENSOARGO( serum al

miR-378b, miR-195a-5p, miR-6516-3p, miR-376a-2-5p, miR-363, miR-670-3p, miR-29a-3p, miR-16a, miR-15a, miR-502-5p, miR-656-5p, miR-22-5p, miR-92a-3p, miR-17-3p, novel\_120, miR-326-3p, miR-24-3p, miR-194-5p, miR-145a-5p, miR-181a-5p, miR-1434-3p, miR-2284ab, miR-29b, miR-187-3p, miR-432-5p, miR-2284d, miR-197-5p, miR-330-3p, miR-224-5p, miR-130b-5p, miR-345-5p, miR-654-3p, miR-3154, miR-503-3p, miR-381-3p, miR-671-5p, miR-7144-5p, novel\_48, let-7g-3p, miR-2284n, miR-3969, miR-331-3p, miR-144, miR-135a-1-3p, miR-29b-3p, miR-103b, miR-3607-3p, miR-1306-5p, miR-365a-5p, miR-378c, miR-30a-5p, miR-29d-3p, let-7a-2-3p, miR-300, miR-376a-5p, miR-222, miR-214-5p, miR-545-5p, miR-378h, miR-2411-5p, miR-302a-5p, miR-200c, miR-92a-3p, miR-200c-3p, miR-17-3p, miR-4286, miR-2385-3p, miR-1, miR-3529-3p, miR-2284a, miR-376b-5p, miR-376c-5p, miR-361-3p, miR-499b-5p, miR-27a-3p, miR-3082-5p, miR-378e, miR-30b-5p, miR-3958-3p, miR-194b-5p, miR-3059-5p, miR-219a-2-3p, miR-378b, miR-484, miR-3120-5p, miR-2284aa, miR-16-2-3p, miR-2426, miR-378c, miR-27a-3p, miR-105-1, miR-409b, miR-151a-3p, miR-221-3p, miR-142-3p, miR-326, miR-424-5p, miR-494-3p, miR-758-3p, miR-3187-3p, miR-21a-3p, miR-582-5p, miR-30f, let-7g-3p, miR-532-5p, miR-182-5p, miR-378a-3p, miR-140-5p, miR-155-5p, miR-655-3p, miR-324-3p, miR-222-3p, miR-208b-5p, miR-6516-3p, miR-155-5p, miR-17-3p, miR-450b-3p, miR-378c, miR-206-3p, miR-1197-5p, miR-5703, miR-2904, miR-376a-5p, let-7a-3p, miR-15a-5p, miR-185-3p, miR-299-3p, miR-466i-5p, miR-2284m, miR-216c-5p, miR-146a-5p, miR-2411, miR-125b-2-3p, miR-130a-5p, miR-3970, miR-378f, miR-146b-5p, miR-412-3p, miR-2284e, miR-3120-3p, miR-144-3p, miR-411b-3p, miR-299b-3p, novel\_87, miR-576-3p, miR-29a, miR-206, miR-29c-3p, novel\_23, miR-450c-3p, miR-432, miR-27b-3p, miR-188-5p, miR-107-5p, miR-26a-2-3p, miR-16-1-3p, miR-16b, miR-31-

TYRP1      ENSOARGO( tyrosina

miR-3432a, miR-204-5p, miR-374b-3p, miR-486b-3p, miR-28-5p, miR-592, miR-331-3p, miR-100-3p, miR-3969, novel\_63, miR-370-5p, miR-378c, miR-374a-3p, miR-23a-5p, miR-7144-5p, miR-1814c, miR-345-5p, miR-320a, miR-133c, miR-34c-5p, miR-365a-3p, miR-2355-5p, miR-370-3p, miR-3068-3p, miR-874-3p, novel\_96, miR-152-3p, miR-450a-2-3p, miR-127-5p, miR-30c-2-3p, miR-30f, miR-205-5p, miR-125a-3p, miR-6119-5p, miR-200a, miR-1957a, novel\_39, miR-192-3p, miR-2478, miR-3064-5p, miR-30a-3p, miR-181a-2-3p, miR-2403, miR-128-3p, miR-218-2-3p, miR-23b-5p, miR-1290, miR-302a-5p, miR-378h, miR-431, miR-299a-3p, miR-203b-5p, miR-147-5p, novel\_1, miR-485-3p, miR-34c, miR-502-5p, miR-208a-3p, miR-576-3p, miR-449a, miR-2428, miR-211, miR-1839-3p, novel\_101, miR-1193, miR-219b-3p, miR-342-3p, miR-146b-5p, miR-378f, miR-1291, miR-19a-3p, miR-2285k, miR-216a-3p, miR-148a-3p, miR-320c, miR-34b, miR-411b-3p, novel\_69, miR-299b-3p, miR-3120-3p, miR-329-5p, miR-378b, miR-452-5p, miR-466f-3p, miR-378a-5p, miR-194a, miR-503-5p, miR-582, miR-146a, miR-377-3p, miR-539-3p, miR-345-5p, miR-2285r, miR-432-3p, miR-130b-5p, miR-16-1-3p, miR-194-5p, miR-223-3p, novel\_116, miR-544b, miR-503-5p, miR-185-5p, miR-377-5p, miR-3955-5p, miR-874-5p, miR-487a-5p, miR-4492, miR-708-5p, miR-130b-5p, novel\_74, miR-30a-3p, miR-324-3p, miR-320e, miR-15b-3p, miR-30e-3p, miR-6525, miR-214, miR-3074-2-3p, miR-378c, miR-3184-3p, miR-1827, miR-345-5p, miR-21a-3p, miR-204-3p, novel\_32, miR-27a-5p, miR-544-3p, miR-377-3p, miR-139-5p, miR-216b-5p, miR-370-5p, miR-552-3p, miR-2331-3p, miR-30c-1-3p, miR-378a-3p, miR-34b-5p, miR-299-3p, miR-320d, miR-466i-5p, miR-324-3p, miR-216a-5p, miR-422a, miR-208b-3p, miR-210-5p, miR-2432, miR-146a-5p, miR-486-3p, miR-143-3p, miR-2285i, miR-421-5p, miR-195b-2-3p, miR-130a-5p, miR-377-5p, miR-345-3p, miR-329a-3p, miR-92a-3p, miR-300, miR-92a-3p, miR-1185-5p, miR-5703, miR-32, miR-503-5p, miR-381-3p, miR-25-3p, miR-503-5p, miR-92b-3p, miR-2285aa, miR-363-3p, miR-503-5p, miR-32-5p

FSD2

ENSOARGO( fibronec

LURAP1L

ENSOARGO( leucine

miR-49b-3p, miR-17-3p, miR-2285x, miR-323c, novel\_27, miR-6402, let-7i, novel\_1, miR-203b-5p, miR-147-5p, miR-199c, novel\_68, miR-329-5p, miR-3074-5p, miR-26b-5p, miR-3120-3p, miR-323a-5p, miR-677, miR-181b-3p, miR-378b, miR-3591-3p, miR-2319a, miR-376a-2-5p, let-7e-5p, miR-2285r, miR-2285v, miR-105-5p, miR-194a, miR-196b-5p, miR-106b-3p, miR-133b-5p, miR-2285g, let-7g-5p, miR-544b, miR-2355-3p, miR-873a-5p, miR-1843b-5p, miR-223-3p, miR-22-3p, miR-194-5p, miR-374b-3p, miR-145a-5p, miR-380-3p, miR-144-5p, miR-145-3p, novel\_63, miR-135a-1-3p, miR-409-3p, miR-134-5p, miR-3068-3p, miR-424-3p, miR-320a, miR-2318, novel\_91, miR-329a, miR-3074-1-3p, miR-485-5p, miR-3529-3p, miR-3064-5p, miR-30a-3p, miR-181a-2-3p, novel\_39, miR-200a, let-7g, miR-376c-5p, miR-376b-5p, miR-192-3p, miR-450c-5p, miR-2285af, miR-3071-3p, let-7c-5p, miR-450a-2-3p, miR-17-3p, let-7f-5p, miR-543-5p, miR-302a-5p, miR-2411-5p, miR-134-5p, miR-196a-5p, miR-134, let-7d, miR-32-3p, novel\_60, miR-3956-3p, miR-6527, miR-194b-5p, miR-452-5p, miR-8095, miR-499a-5p, miR-450a-5p, miR-490-5p, miR-2284q, miR-3064-5p, miR-2319b, miR-541-5p, miR-3082-5p, miR-203-3p, miR-144-5p, let-7d-5p, miR-140-5p, miR-381-3p, miR-9-3p, novel\_94, let-7a-5p, miR-23a-3p, miR-652-5p, miR-193a, miR-1b-5p, miR-320b, miR-505, miR-362-3p, miR-3085-3p, let-7e, miR-105-1, miR-199b-3p, miR-1343-3p, miR-145b, miR-181b-2-3p, miR-2459, miR-2285e, miR-421, miR-329-3p, miR-3962, miR-362-3p, miR-2426, miR-544a, miR-3120-5p, let-7b, miR-3184-3p, miR-145a-3p, miR-3074-5p, miR-4510, miR-6525, let-7b-5p, miR-6134, miR-2285j, let-7f, miR-30e-3p, miR-30a-3p, miR-320e, novel\_74, miR-17-3p, miR-4492, miR-140-5p, miR-32-3p, miR-548o-3p, miR-21-3p, miR-532-5p, miR-544-3p, miR-6130, miR-323-5p, miR-22-3p, novel\_25, let-7i-5p, miR-151b, miR-2285c, miR-329a-5p, miR-664b-3p, miR-

miR-1291, miR-797b, miR-146b-5p, miR-135b-5p, miR-639b, miR-376b-5p, miR-2285ab, miR-378b, miR-376b-3p, miR-3591-3p, miR-2404, miR-29a-3p, novel\_69, miR-374c-3p, miR-669, novel\_68, miR-320b, miR-3120-3p, miR-92a-3p, miR-6119-3p, miR-206, miR-29a, miR-6123, miR-502-5p, novel\_87, miR-371b-3p, miR-3959-3p, miR-326-3p, miR-342-3p, miR-335-5p, miR-1839-3p, miR-193b-3p, miR-29c-3p, miR-17-3p, miR-495-3p, miR-30b-3p, miR-138, miR-29b, miR-2284x, miR-455-5p, miR-1434-3p, novel\_23, miR-194-5p, miR-134-3p, miR-411-5p, miR-149-5p, miR-339-5p, miR-26b-3p, miR-124-5p, miR-106b-3p, miR-193a-3p, miR-146a, miR-32, miR-194a, miR-455-5p, miR-432-3p, miR-654-3p, miR-2284l, miR-432-3p, miR-345-5p, miR-130b-5p, miR-363-5p, miR-628-5p, miR-345-5p, miR-376c-5p, miR-23a-5p, miR-671-5p, miR-1814c, miR-376c-5p, miR-362-5p, miR-300-3p, miR-3965, miR-365a-3p, miR-25-3p, miR-324-5p, miR-154b-5p, miR-574-5p, miR-3068-3p, miR-2355-5p, miR-2285aa, miR-615-5p, miR-138-5p, miR-486b-3p, miR-191-5p, miR-592, miR-2284k, miR-29b-3p, miR-331-3p, miR-26c, miR-135a-5p, miR-323-3p, miR-500b-5p, miR-1197-3p, miR-1306-5p, miR-193a-5p, miR-144-5p, miR-155-5p, miR-29d-3p, miR-330-5p, miR-9-5p, miR-302a-5p, miR-1271-5p, miR-545-5p, novel\_121, miR-2285ad, novel\_79, miR-17-3p, miR-127-5p, miR-92a-3p, miR-2285af, miR-376b-3p, miR-3071-3p, miR-339a, miR-217, miR-450b-5p, miR-92b-3p, miR-3065-3p, miR-376c-5p, miR-376b-5p, miR-2284y, miR-1271-3p, miR-490-3p, miR-2285b, miR-1, miR-4286, miR-96-5p, miR-504, miR-668-5p, miR-376a-3p, miR-877-3p, miR-129b-5p, miR-378g, miR-7857-3p, miR-25, miR-144-5p, miR-376d, miR-2284g, miR-7689-3p, miR-2285u, miR-499b-5p, miR-126b-5p, miR-335, miR-2285t, miR-2285n, novel\_82, miR-2285y, miR-301a-5p, miR-107-5p, miR-362-5p, miR-423-5p, miR-2447, miR-363-3p, miR-2285f, miR-194b-5p, miR-2284i, miR-9-5p, miR-1388-5p, miR-2126, miR-299a-3p, miR-7134-3p, miR-424-5p, miR-134-5p, miR-16a, miR-15a, miR-6402, miR-3957-3p, miR-16-5p, miR-214, miR-129-2-3p, miR-541-3p, miR-625-5p, miR-1827, miR-195a-5p, miR-1291, miR-3141, miR-15b-5p, miR-3596, miR-374c-3p, miR-374c-3p, miR-3082-5p, miR-182-5p, miR-1343-5p, miR-214-3p, miR-127-5p, miR-3141, miR-182-5p, miR-16b, miR-3187-3p, miR-345-3p, miR-181a-2-3p, miR-424-5p, miR-497-5p, miR-16b, miR-2904, miR-1343-5p, miR-374b-3p, novel\_133, miR-541, miR-134, miR-134-5p, miR-129-1-3p, miR-322-5p, miR-3431, miR-15a-5p, miR-3955-5p, miR-3960

miR-365b-5p, novel\_51, miR-146a, let-7j, miR-2285r, miR-432-3p, miR-432-3p, miR-668-3p, miR-4508, miR-3432b, miR-381-5p, miR-450c-3p, miR-432, miR-3431, miR-339-5p, miR-340-3p, miR-1307-5p, miR-576-3p, miR-146b-5p, miR-378f, let-7e-5p, miR-1306, miR-320c, miR-669, miR-299b-3p, novel\_69, miR-3074-5p, miR-200a-3p, novel\_127, let-7f-5p, miR-219-3p, miR-125a-3p, novel\_39, let-7g, miR-29a-5p, miR-330-5p, miR-450a-1-3p, miR-134-5p, miR-505-5p, novel\_79, miR-18b-5p, miR-299a-3p, miR-126b-3p, miR-134-5p, miR-125b-5p, miR-2433, miR-1260b, miR-193a-5p, novel\_42, miR-1248, miR-329a, miR-424-3p, miR-300-3p, miR-2285aa, miR-99a-3p, miR-125a, miR-3956, miR-146b, miR-214-3p, miR-381-5p, miR-1185-5p, miR-505, miR-29b-1-5p, novel\_19, miR-182-5p, miR-378d, miR-1388-3p, miR-127-3p, miR-101c, miR-362-3p, miR-329-3p, miR-301b-5p, miR-539-5p, miR-490-5p, miR-301a-5p, miR-423-5p, miR-877-3p, miR-361-3p, miR-6527, let-7i-3p, miR-2447, miR-3963, miR-99b-5p, miR-504, miR-378j, miR-4443, let-7k, miR-98-5p, miR-99a-3p, miR-324-3p, miR-422a, miR-92a-1-5p, novel\_17, miR-618, miR-210-5p, miR-486-3p, miR-34a-5p, miR-184-3p, miR-378a-3p, miR-378i, miR-1961, miR-1247-5p, miR-7859, miR-18a-3p, miR-4492, miR-129-5p, miR-874-5p, miR-130b-5p, miR-219b-3p, miR-665, let-7f, miR-3184-5p, miR-769-5p, miR-6525, miR-214, miR-665-5p, let-7b, miR-3184-3p, miR-3074-5p, miR-1827, miR-339b, miR-450a-1-3p, miR-2285c, miR-151b, let-7i-5p, miR-216b-5p, miR-296-3p, miR-504-5p, miR-30c-1-3p, miR-548o-3p, miR-125a-5p, miR-197-5p, miR-99a-5p, miR-136-3p, miR-130b-5p, miR-2889, miR-744-5p, miR-30b-3p, miR-1260b, miR-544b, miR-2285g, miR-432-5p, miR-185-5p, let-7g-5p, miR-665, miR-133b-5p, miR-147-5p, miR-128-1-5p, novel\_1, miR-34c, miR-33a-3p, let-7i, miR-6529b, miR-326-3p, miR-449a, miR-2428, miR-542-5p, miR-219b-3p, miR-450b-3p, miR-1291, miR-18a-3p, miR-

miR-29a-3p, miR-34b, miR-6535, miR-216b-3p, miR-107, miR-6395, miR-3141, miR-216a-3p, miR-18a-3p, miR-24-3p, miR-371b-3p, miR-211, miR-199b-5p, miR-2428, miR-326-3p, miR-449a, novel\_101, miR-29c-3p, miR-17-3p, miR-3957-3p, miR-193b-3p, miR-29a, miR-128-1-5p, miR-6123, miR-34c, miR-134-3p, miR-3431, miR-103, miR-194-3p, miR-103a-3p, miR-29b, miR-188-5p, miR-455-5p, miR-2889, miR-26a-2-3p, miR-1285, miR-22-3p, miR-197-3p, miR-654-3p, miR-345-5p, miR-196b-5p, miR-193a-3p, miR-452-5p, miR-1343-5p, miR-660, miR-455-5p, novel\_51, miR-2411-3p, miR-3141, miR-34c-5p, miR-199a-5p, miR-874-3p, miR-615-5p, miR-3956, miR-370-3p, miR-345-5p, miR-1248, miR-488-3p, novel\_42, miR-486b-3p, miR-204-5p, miR-29b-3p, miR-24-2-5p, miR-505-5p, miR-214-5p, miR-128-3p, miR-345-3p, miR-196a-5p, miR-330-5p, miR-1343-5p, miR-29d-3p, miR-199a-5p, miR-3065-3p, miR-4286, miR-450a-2-3p, miR-2898, miR-17-3p, novel\_96, novel\_127, miR-107, miR-125a-3p, miR-378g, miR-7857-3p, miR-211-5p, miR-199b-5p, miR-361-3p, miR-361-3p, miR-541-3p, let-7i-3p, miR-4726-5p, miR-101-3p, miR-301a-5p, miR-371a-5p, miR-1973, miR-147a, miR-216a-3p, miR-409b, miR-2426, miR-541, miR-301b-5p, miR-296-5p, miR-3962, miR-4532, miR-1388-3p, let-7c-3p, miR-491-5p, miR-199b-5p, miR-326, miR-193b-3p, miR-132-5p, miR-22-3p, miR-660-5p, miR-2331-3p, miR-3065-3p, miR-345-5p, let-7g-3p, miR-1827, miR-664a, miR-17-3p, miR-4492, miR-874-5p, miR-328-3p, miR-18a-3p, novel\_73, miR-378d, miR-34a-5p, novel\_133, miR-1197-5p, miR-2904, miR-143-3p, miR-486-3p, miR-466i-5p, miR-760-3p, miR-34b-5p, miR-345-3p, miR-185-3p, miR-324-3p, miR-30c-2-3p, miR-190a, novel\_1, miR-374b-3p, miR-199c, miR-374a-3p, miR-190a-5p, miR-660, miR-541-3p, miR-2285x, miR-190b-5p, miR-374a-3p, miR-30c-1-3p, miR-541, miR-653, miR-5703, miR-16-1-3p, miR-186-5p, miR-16-1-3p, miR-660-5p, miR-199b-3p, miR-30c-1-3p, miR-139-5p, miR-222-5p, miR-665, miR-340-5p, miR-139-5p, miR-455-3p, miR-4510, miR-3074-5p, miR-214, miR-432-3p, miR-432-3p, miR-449a, miR-34c, miR-324-3p, miR-2957, miR-664a, miR-4726-5p, miR-214-3p, miR-34b-5p, miR-133b-5p, miR-3074-5p, miR-504-5p, miR-34b, miR-6130, miR-432-5p, miR-34c-5p, miR-361-3p, miR-432, miR-150-5p, miR-504, miR-671-5p, miR-34a-5p, miR-485-5p, miR-7144-5p

NARFL ENSOARGO(nuclear

DNASE2B ENSOARGO(deoxyrib

SLC22A31 ENSOARGO(solute c



miR-431-5p, miR-29b-1-5p, miR-395b-3p, miR-214-3p, let-7c-3p, miR-378d, miR-30c-1-3p, miR-301b-5p, miR-143-5p, miR-378b, miR-30b-3p, miR-125b-2-3p, miR-2426, miR-378c, miR-1388-5p, miR-101c, miR-105-1, miR-548w, miR-181b-2-3p, miR-216a-3p, miR-500-5p, miR-455-3p, miR-101-3p, miR-2440, miR-301a-5p, miR-628-3p, miR-2284j, miR-181d-5p, miR-877-3p, miR-362-5p, miR-129b-5p, miR-452-3p, miR-10b, miR-139-5p, miR-126b-5p, miR-499b-5p, miR-2483-3p, miR-378e, miR-2285p, miR-422a, miR-345-3p, miR-2284m, miR-21-3p, miR-34b-5p, miR-487a, miR-183-5p, miR-345-3p, miR-369-3p, miR-181b-1-3p, miR-376a-5p, miR-29b-1-5p, miR-486-3p, miR-2300b-3p, miR-378i, miR-378a-3p, miR-140-3p, miR-5703, miR-34a-5p, miR-548e-3p, miR-7859, miR-487a-3p, novel\_83, miR-2285j, miR-29b-2-5p, miR-665, miR-324-3p, miR-17-3p, miR-6516-3p, miR-539-5p, miR-378c, miR-214, miR-6525, miR-181c-5p, miR-21a-3p, miR-345-5p, miR-154b-3p, let-7g-3p, miR-133b-3p, miR-548o-3p, miR-30c-1-3p, miR-378a-3p, miR-545-3p, miR-3065-3p, miR-216b-5p, miR-139-5p, miR-877-5p, miR-2411-3p, miR-105-5p, miR-6240, miR-628-5p, miR-101-5p, miR-432-3p, miR-432-3p, miR-345-5p, miR-539-3p, miR-181a-5p, miR-197-3p, miR-219a-1-3p, miR-30b-3p, miR-29b, miR-2284ab, miR-2284x, miR-26a-2-3p, novel\_116, miR-411-5p, miR-34c, miR-29a, novel\_1, miR-147-5p, miR-421-5p, miR-203b-5p, miR-17-3p, novel\_101, miR-29c-3p, miR-323c, miR-2428, miR-2285m, miR-449a, miR-3065-5p, miR-6516-3p, miR-378f, miR-216b-3p, miR-3120-3p, miR-670-3p, miR-29a-3p, miR-34b, miR-181b-3p, miR-677, miR-200c, miR-2285af, miR-30c-2-3p, miR-200c-3p, miR-181b-5p, miR-17-3p, miR-200a-3p, miR-29b-2-5p, novel\_39, miR-3065-3p, miR-134, miR-3578, miR-345-3p, miR-29d-3p, miR-218-2-3p, miR-105-2, miR-429-3p, miR-431, miR-378h, novel\_121, miR-582-3p, miR-128-3p, miR-33b-3p, miR-4429, miR-300, miR-140-3p, miR-188-3p, miR-376a-5p, miR-134, miR-134-5p, miR-532-3p, miR-1224-5p, miR-1b-3p, miR-6517, miR-221-5p, miR-320d, miR-2898, miR-185-3p, miR-92a-1-5p, novel\_17, novel\_39, miR-376a-5p, miR-345-3p, miR-181a-2-3p, miR-10b-3p, miR-129b-3p, miR-433-3p, miR-362-5p, miR-320a, miR-381-3p, miR-204-3p, miR-377-3p, miR-374c-3p, miR-370-3p, miR-2355-5p, miR-1271, miR-296-3p, miR-221-5p, miR-2331-3p, miR-4492, miR-134-5p, miR-138-5p, miR-664a, miR-331-3p, miR-320e, miR-5100, miR-10b-3p, miR-500b-5p, miR-145a-3p, miR-3120-5p, miR-7862, miR-138, miR-374b-3p, miR-125b-2-3p, miR-7b-5p, miR-542-3p, miR-500-5p, miR-149-5p, miR-194-3p, miR-2459, miR-181b-2-3p, miR-2300a-5p, miR-1343-3p, miR-103a-2-5p, miR-7-5p, miR-320b, miR-1306-5p, miR-377-3p, miR-8485, miR-654-3p, miR-363-5p, miR-9851-3p, miR-877-3p, miR-1306, miR-216a-3p, miR-361-3p, miR-320c, miR-677, miR-374c-3p, novel\_68, miR-2319b, miR-128-1-5p, miR-107-5p, miR-502-5p, miR-877-3p, miR-362-5p, miR-24-3p, miR-2447, miR-3059-5p

CDKL3 ENSOARGO(cyclin-d 345-5p, miR-154b-3p, let-7g-3p, miR-133b-3p, miR-548o-3p, miR-30c-1-3p, miR-378a-3p, miR-545-3p, miR-3065-3p, miR-216b-5p, miR-139-5p, miR-877-5p, miR-2411-3p, miR-105-5p, miR-6240, miR-628-5p, miR-101-5p, miR-432-3p, miR-432-3p, miR-345-5p, miR-539-3p, miR-181a-5p, miR-197-3p, miR-219a-1-3p, miR-30b-3p, miR-29b, miR-2284ab, miR-2284x, miR-26a-2-3p, novel\_116, miR-411-5p, miR-34c, miR-29a, novel\_1, miR-147-5p, miR-421-5p, miR-203b-5p, miR-17-3p, novel\_101, miR-29c-3p, miR-323c, miR-2428, miR-2285m, miR-449a, miR-3065-5p, miR-6516-3p, miR-378f, miR-216b-3p, miR-3120-3p, miR-670-3p, miR-29a-3p, miR-34b, miR-181b-3p, miR-677, miR-200c, miR-2285af, miR-30c-2-3p, miR-200c-3p, miR-181b-5p, miR-17-3p, miR-200a-3p, miR-29b-2-5p, novel\_39, miR-3065-3p, miR-134, miR-3578, miR-345-3p, miR-29d-3p, miR-218-2-3p, miR-105-2, miR-429-3p, miR-431, miR-378h, novel\_121, miR-582-3p, miR-128-3p, miR-33b-3p, miR-4429, miR-300, miR-140-3p, miR-188-3p, miR-376a-5p, miR-134, miR-134-5p, miR-532-3p, miR-1224-5p, miR-1b-3p, miR-6517, miR-221-5p, miR-320d, miR-2898, miR-185-3p, miR-92a-1-5p, novel\_17, novel\_39, miR-376a-5p, miR-345-3p, miR-181a-2-3p, miR-10b-3p, miR-129b-3p, miR-433-3p, miR-362-5p, miR-320a, miR-381-3p, miR-204-3p, miR-377-3p, miR-374c-3p, miR-370-3p, miR-2355-5p, miR-1271, miR-296-3p, miR-221-5p, miR-2331-3p, miR-4492, miR-134-5p, miR-138-5p, miR-664a, miR-331-3p, miR-320e, miR-5100, miR-10b-3p, miR-500b-5p, miR-145a-3p, miR-3120-5p, miR-7862, miR-138, miR-374b-3p, miR-125b-2-3p, miR-7b-5p, miR-542-3p, miR-500-5p, miR-149-5p, miR-194-3p, miR-2459, miR-181b-2-3p, miR-2300a-5p, miR-1343-3p, miR-103a-2-5p, miR-7-5p, miR-320b, miR-1306-5p, miR-377-3p, miR-8485, miR-654-3p, miR-363-5p, miR-9851-3p, miR-877-3p, miR-1306, miR-216a-3p, miR-361-3p, miR-320c, miR-677, miR-374c-3p, novel\_68, miR-2319b, miR-128-1-5p, miR-107-5p, miR-502-5p, miR-877-3p, miR-362-5p, miR-24-3p, miR-2447, miR-3059-5p

KANSL3 ENSOARGO(KAT8 reg 500b-5p, miR-145a-3p, miR-3120-5p, miR-7862, miR-138, miR-374b-3p, miR-125b-2-3p, miR-7b-5p, miR-542-3p, miR-500-5p, miR-149-5p, miR-194-3p, miR-2459, miR-181b-2-3p, miR-2300a-5p, miR-1343-3p, miR-103a-2-5p, miR-7-5p, miR-320b, miR-1306-5p, miR-377-3p, miR-8485, miR-654-3p, miR-363-5p, miR-9851-3p, miR-877-3p, miR-1306, miR-216a-3p, miR-361-3p, miR-320c, miR-677, miR-374c-3p, novel\_68, miR-2319b, miR-128-1-5p, miR-107-5p, miR-502-5p, miR-877-3p, miR-362-5p, miR-24-3p, miR-2447, miR-3059-5p

RPF1 ENSOARGO(ribosome miR-143-3p, miR-2284x, miR-124-5p, miR-3431

miR-320d, novel\_127, miR-1260a, miR-196a-3p, miR-185-3p, miR-30c-2-3p, miR-324-3p, miR-941, miR-4429, miR-15a-5p, miR-322-5p, novel\_121, miR-2284h-5p, miR-18a-3p, miR-424-5p, miR-151-3p, miR-346, miR-1260b, miR-145-3p, miR-3074-2-3p, miR-16-5p, miR-1248, miR-21a-3p, miR-320a, miR-15b-5p, miR-504-5p, miR-30c-1-3p, miR-370-3p, miR-320b, miR-16b, miR-330-3p, miR-197-5p, miR-30c-1-3p, miR-6240, miR-424-5p, let-7f-2-3p, let-7f-2-3p, miR-1260b, miR-16b, miR-6239, miR-497-5p, miR-1434-3p, miR-432, novel\_23, miR-539-5p, miR-3431, miR-432-5p, miR-1185-3p, miR-194-3p, novel\_116, miR-330-3p, miR-151a-3p, miR-31-5p, miR-6119-3p, miR-502-5p, miR-15a, miR-382-3p, miR-16a, miR-504, miR-450b-3p, miR-195a-5p, miR-361-3p, miR-18a-3p, novel\_69, miR-670-3p, miR-1185-2-3p, miR-320c, miR-20a-3p, miR-3120-3p, miR-219b-3p, novel\_101, miR-193b-3p, miR-2428, miR-301b-3p, miR-142b, miR-6529b, miR-15a, miR-1247-3p, miR-16a, miR-203b-5p, miR-3074-5p, novel\_68, miR-2404, miR-669, miR-148a-3p, miR-376b-5p, miR-18a-3p, miR-376b-3p, miR-3591-3p, miR-1306, miR-412-3p, miR-6516-3p, miR-195a-5p, miR-378f, miR-2319a, miR-628-5p, miR-668-3p, miR-432-3p, miR-432-3p, miR-654-3p, miR-377-3p, miR-224-5p, miR-2411-3p, novel\_51, miR-193a-3p, miR-31-5p, miR-26b-3p, miR-665, miR-130a-3p, miR-134-3p, miR-3431, miR-412-5p, miR-3535, miR-544b, miR-1434-3p, miR-181a-5p, miR-223-3p, miR-873a-5p, miR-1260b, miR-16-1-3p, miR-16b, miR-2284ab, miR-2889, miR-497-5p, novel\_42, miR-16-5p, miR-1260b, miR-378c, miR-181c-3p, miR-494-5p, miR-410-5p, miR-2284k, novel\_9, miR-141-3p, miR-1271, miR-215-5p, miR-2285aa, miR-2284n, miR-324-5p, miR-376c-5p, miR-329a, miR-10b-3p, miR-671-5p, miR-485-5p, miR-23a-5p, miR-376c-5p, miR-3529-3p, miR-181a-2-3p, miR-3064-5p, miR-3956-5p, miR-450c-5p, miR-200a, miR-376b-5p, miR-376c-5p, miR-200c, miR-376b-3p, miR-205-5p, miR-1260a, miR-181c-3p, miR-30f, miR-127-5p, miR-200c-3p, miR-181b-5p, miR-200a-3p, novel\_127, miR-152-3p, miR-429-3p, miR-412, miR-1224-5p, miR-758-5p, miR-378h, miR-322-5p, miR-345-3p, miR-200b-3p, miR-3956-3p, novel\_60, miR-3059-5p, miR-181d-5p, miR-361-3p, miR-877-3p, novel\_82, miR-301a-5p, miR-450a-5p, miR-490-5p, miR-2319b, miR-3064-5p, miR-7689-3p, miR-3082-5p, miR-378e, miR-3596, miR-378g, miR-499a-3p, miR-376d, miR-504, miR-136-5p, miR-181a-3p, miR-1983, miR-376a-3p, miR-424-5p, miR-382-3p, miR-1388-3p, miR-378d, miR-8485, miR-4532, miR-3187-3p, miR-1306-5p, miR-199a-3p, miR-16b, miR-362-3p, miR-130b-3p, miR-1185-5p, miR-3085-3p, miR-2300a-5p, novel\_78, miR-376b-3p, miR-4791, miR-301b-5p, miR-329-3p, miR-2284r, miR-378b, miR-412-3p, miR-544a, miR-378c, miR-362-3p, miR-3184-3p, miR-3074-5p, miR-378c, miR-224-

POU2AF1 ENSOARGO( POU clas  
 IFT88 ENSOARGO( intrafla

miR-424-3p, miR-200a-5p, miR-137-3p, miR-329b, miR-23a-5p, miR-615-5p, miR-141-3p, miR-125a, miR-223-5p, miR-324-5p, miR-376c-3p, miR-29b-3p, miR-5100, miR-125b-5p, miR-374b-3p, miR-204-5p, miR-1306-5p, miR-28a-3p, miR-16-5p, miR-6128, miR-1260b, miR-374a-3p, miR-145-3p, miR-196a-5p, miR-2427, miR-1343-5p, miR-29d-3p, miR-330-5p, miR-501-3p, miR-411-3p, miR-6517, miR-412, miR-431, miR-302a-5p, miR-322-5p, miR-483-3p, miR-582-3p, miR-205-5p, miR-1260a, miR-125a-3p, miR-30c-2-3p, miR-28-3p, miR-17-3p, miR-181b-5p, miR-200a-3p, miR-29b-2-5p, miR-3064-5p, miR-28b, miR-200a, miR-1957a, miR-1271-3p, miR-490-3p, miR-2387, miR-150-5p, miR-3970, miR-1306, miR-412-3p, miR-146b-5p, miR-2319a, miR-195a-5p, miR-2404, miR-670-3p, miR-374c-3p, miR-29a-3p, miR-15a, miR-576-3p, miR-28c, miR-133a-5p, miR-485-3p, miR-16a, miR-6119-3p, miR-379-3p, miR-29a, miR-6123, novel\_120, miR-193b-3p, miR-17-3p, miR-29c-3p, miR-211, miR-323c, miR-3959-3p, miR-326-3p, miR-2284w, miR-223-3p, miR-181a-5p, miR-22-3p, miR-194-5p, miR-145a-5p, miR-29b, miR-380-3p, miR-16b, miR-1260b, miR-16-1-3p, miR-26a-2-3p, miR-497-5p, miR-188-5p, miR-377-5p, miR-26b-3p, miR-134-3p, miR-146a, miR-194a, novel\_51, miR-483-3p, miR-196b-5p, miR-452-5p, miR-1343-5p, miR-125a-5p, miR-466f-3p, miR-193a-3p, miR-130b-5p, miR-382, miR-21a-3p, miR-411, miR-543-3p, miR-1827, miR-221-5p, miR-140-5p, miR-30c-1-3p, miR-548o-3p, miR-216b-3p, miR-376e-3p, miR-216b-5p, miR-193b-3p, miR-204-3p, miR-22-3p, miR-15b-5p, miR-2285j, miR-324-3p, miR-664a-5p, miR-29b-2-5p, miR-3604, miR-17-3p, miR-487a-5p, miR-424-5p, miR-4492, miR-130b-5p, miR-539-5p, miR-145a-3p, miR-214, miR-122-5p, miR-338-3p, miR-181c-5p, novel\_133, miR-376a-5p, miR-2366, miR-124-3p, miR-2904, miR-140-3p, miR-5703, miR-1424-5p, miR-32b-3p, miR-16-1-3p, miR-548a-3p, miR-1b-3p, miR-21-5p, miR-105-2, miR-30c, let-7a-2-3p, miR-30c-5p, miR-412-3p, miR-197-3p, miR-140-3p, miR-30a-5p, miR-7859, miR-545-5p, miR-2355-3p, miR-548e-3p, miR-105-1, miR-412, miR-30d, miR-30b, miR-3071-3p, miR-324-3p, miR-105-5p, miR-3141, let-7a-2-3p, let-7g-3p, miR-30f, let-7g-3p, miR-625-5p, novel\_99, miR-30e-5p, miR-3141, miR-598-3p, miR-21c, miR-30d-5p, miR-3596, miR-3965, miR-548o-3p, miR-499b-5p, miR-598-3p, miR-216b-3p, novel\_1, miR-30b-5p, miR-877-3p, miR-3059-5p, miR-2285x

miR-29b-1-5p, miR-8485, miR-20a-3p, miR-676-3p, miR-33a-5p, miR-362-3p, miR-329a, miR-125b-1-3p, miR-147-5p, miR-329-3p, miR-362-3p, miR-362-3p, miR-29b-1-5p

MGARP ENSOARGO(mitochon

STAG2 ENSOARGO( stromal

HOMER2 ENSOARGO( homer sc:

miR-5100, miR-370-5p, miR-331-3p, miR-144, miR-125b-5p, novel\_9, miR-204-5p, miR-16-5p, miR-3607-3p, miR-1260b, miR-500b-5p, miR-378c, miR-301, miR-503-3p, miR-362-5p, miR-18a, miR-137-3p, miR-200a-5p, miR-485-5p, miR-1248, miR-125a, miR-2285aa, miR-769, miR-365a-3p, miR-374c-3p, miR-34c-5p, miR-199a-5p, miR-1260a, miR-217, miR-30c-2-3p, miR-17-3p, miR-543-5p, miR-4286, miR-30a-3p, miR-2385-3p, miR-148b-5p, miR-2478, miR-199a-5p, miR-3591-5p, miR-330-5p, miR-1343-5p, miR-411-3p, miR-105-2, miR-6517, miR-18b-5p, miR-412, miR-378h, miR-1271-5p, miR-322-5p, miR-214-5p, miR-6529b, miR-133a-5p, miR-3613, miR-15a, miR-4324, miR-16a, miR-485-3p, miR-34c, miR-379-3p, miR-1193, novel\_101, miR-17-3p, miR-3957-3p, miR-193b-3p, miR-24-3p, miR-211, miR-199b-5p, miR-326-3p, miR-449a, miR-18b, miR-3591-3p, miR-150-5p, miR-195a-5p, miR-378f, miR-146b-5p, miR-3074-5p, miR-34b, miR-374c-3p, miR-670-3p, miR-2404, miR-323a-5p, miR-144-3p, miR-377-3p, miR-146a, miR-296-3p, novel\_51, miR-330-3p, miR-105-5p, miR-124-5p, miR-378a-5p, miR-193a-3p, miR-125a-5p, miR-1343-5p, miR-6240, miR-296-3p, miR-223-3p, miR-542-3p, miR-1434-3p, miR-374b-3p, miR-16-1-3p, miR-1260b, miR-16b, miR-497-5p, miR-185-5p, miR-412-5p, miR-30e-3p, miR-320e, miR-665, miR-30a-3p, miR-324-3p, miR-664a, miR-17-3p, miR-424-5p, miR-487a-5p, miR-145a-3p, miR-3074-5p, miR-378c, miR-214, miR-1271, miR-769-5p, miR-3613-5p, miR-18a-5p, miR-186-5p, novel\_99, miR-1895, miR-32-3p, miR-221-5p, miR-30c-1-3p, miR-504-5p, miR-378a-3p, miR-182-5p, miR-296-3p, miR-21-3p, miR-370-5p, miR-139-5p, miR-323-5p, miR-193b-3p, miR-377-3p, miR-544-3p, miR-151b, miR-15b-5p, miR-210-5p, miR-422a, miR-125b, miR-324-3p, miR-760-3p, miR-466i-5p, miR-34b-5p, miR-221-5p, miR-183-5p, miR-216c-5p, miR-345-3p, miR-130a-5p, miR-146a-5p, miR-2366, miR-103b-5p, miR-376a-3p, miR-221-5p, miR-660-5p, miR-3065-3p, miR-141-3p, miR-377-3p, miR-6516, miR-216b-5p, miR-133c, miR-30e-5p, miR-488-3p, miR-200a-5p, miR-137-3p, miR-411, miR-2312, novel\_99, miR-3607-3p, miR-2330-3p, miR-206-3p, miR-374a-3p, miR-338-3p, novel\_63, miR-34c-3p, miR-29b-3p, miR-3604, miR-31-3p, miR-374b-3p, miR-669a-3p, miR-299a-3p, miR-6516-5p, miR-196a-5p, miR-1290, miR-1246, miR-2427, miR-29d-3p, miR-188-3p, miR-30a-5p, miR-33b-3p, miR-582-3p, miR-361-5p, miR-183-5p, miR-195a-3p, miR-1, miR-2424, miR-200a, miR-3065-3p, miR-2285b, miR-2285p, miR-3071-3p, miR-30f, miR-221-5p, miR-543-5p, miR-200a-3p, miR-299-3p, miR-541-5p, miR-299b-3p, miR-29a-3p, miR-669, miR-2285ab, miR-3065-5p, miR-2285f, miR-6527, miR-29c-3p, miR-2285x, miR-877-3p, miR-323c, miR-30b-5p, miR-142b, miR-206, miR-29a, miR-374a-3p, miR-199c, miR-199b-3p, miR-185-5p, miR-6238, miR-1185-3p, miR-1285, miR-1434-3p, miR-1a-3p, miR-3071-5p, miR-29b, miR-450b-5p, miR-16-2-3p, miR-2889, miR-1388-3p, miR-363-5p, miR-652-5p, miR-8485, miR-377-3p, miR-196b-5p, miR-660, miR-466f-3p

NR1H2 ENSOARGO(nuclear

ZDHHC21 ENSOARGO(zinc fin

miR-2285j, miR-324-3p, miR-665, miR-320e, miR-6516-3p, miR-155-5p, miR-17-3p, miR-454-3p, miR-378c, miR-145a-3p, miR-214, miR-6525, miR-3184-5p, miR-6134, miR-129b-3p, miR-1827, novel\_99, miR-378a-3p, miR-3065-3p, miR-301a-3p, miR-499b-3p, miR-22-3p, miR-204-3p, miR-155-5p, novel\_17, miR-422a, miR-185-3p, miR-320d, miR-21-3p, miR-345-3p, miR-664b-3p, miR-377-5p, miR-130a-5p, miR-486-3p, miR-378i, miR-2300b-3p, miR-1197-5p, miR-378a-3p, miR-140-3p, miR-5703, miR-4429, miR-378d, miR-18a-3p, miR-340-5p, miR-148b-3p, miR-199a-3p, miR-107-5p, miR-3059-5p, miR-2447, miR-9-5p, miR-452-5p, miR-877-3p, miR-423-5p, miR-3064-5p, miR-2319b, miR-499a-3p, miR-378e, miR-4443, miR-199a-3p, miR-320b, miR-1306-5p, miR-2957, miR-323b-3p, miR-491-5p, miR-3085-3p, miR-130b-3p, miR-25-5p, miR-103a-2-5p, miR-381-5p, miR-214-3p, miR-33a-5p, miR-378d, miR-484, miR-296-5p, miR-378b, miR-323b, miR-412-3p, miR-125b-2-3p, miR-378c, miR-21b, miR-1343-3p, miR-2300a-5p, miR-455-3p, miR-216a-3p, novel\_63, miR-100-3p, miR-331-3p, miR-486b-3p, miR-134-5p, miR-28a-3p, miR-323-3p, miR-378c, miR-3154, miR-320a, miR-671-5p, miR-874-3p, miR-1271, miR-300-3p, miR-133c, miR-125a-3p, miR-17-3p, miR-2898, miR-28-3p, miR-127-5p, miR-107, novel\_127, novel\_96, miR-152-3p, miR-3064-5p, miR-4286, miR-181a-2-3p, miR-450b-5p, novel\_39, miR-3065-3p, miR-1957a, miR-134, miR-155-5p, miR-128-3p, miR-412, miR-9-5p, miR-378h, miR-758-5p, miR-134-5p, miR-502-5p, miR-382-5p, miR-33a-3p, miR-135a-2-3p, miR-17-3p, novel\_27, miR-301b-3p, miR-148a-3p, miR-1306, miR-150-5p, miR-3065-5p, miR-18a-3p, miR-216a-3p, miR-107, miR-6516-3p, miR-378f, miR-7-1-3p, miR-146b-3p, miR-320c, miR-432-3p, miR-432-3p, miR-22-3p, miR-3071-5p, miR-381-5p, miR-7862, miR-31-5p, miR-103a-3p, miR-130a-3p, miR-665, miR-377-5p, miR-149-5p, miR-103

miR-21b, miR-1388-5p, miR-1a-3p, miR-501-3p, miR-301b-5p, miR-541, miR-421, miR-455-3p, miR-1298-3p, miR-153, miR-199b-3p, miR-548w, miR-330-3p, miR-103a-2-5p, miR-153-3p, miR-146b, miR-199b-5p, miR-182-5p, miR-29b-1-5p, miR-505, miR-431-5p, miR-199a-3p, miR-1b-5p, miR-2310, miR-8485, miR-23a-3p, miR-1388-3p, miR-1983, miR-335-3p, miR-493-5p, miR-136-5p, miR-504, miR-378j, miR-381-3p, miR-140-5p, miR-500-3p, miR-4443, miR-203-3p, miR-2483-3p, miR-25, miR-499a-3p, miR-211-5p, miR-2319b, miR-3964, miR-490-5p, miR-499a-5p, miR-301a-5p, miR-2440, miR-218-5p, miR-1285-5p, novel\_111, miR-361-3p, miR-877-3p, miR-9-5p, miR-2447, miR-34a-5p, miR-361-5p, miR-33b-3p, miR-217-5p, miR-98-3p, miR-2366, miR-30c-5p, miR-23c, miR-7859, miR-23b-3p, miR-30d-3p, miR-18a-3p, miR-2484, miR-202-5p, miR-345-3p, miR-92a-1-5p, miR-210-5p, novel\_17, miR-2285p, miR-26a-5p, miR-30b, miR-380-3p, miR-2424, miR-142a-3p, miR-376a-5p, miR-664b-3p, miR-329a-5p, miR-186-5p, miR-1827, miR-625-5p, miR-339b, miR-433-3p, miR-30d-5p, miR-500a-3p, miR-450a-1-3p, miR-216b-5p, miR-582-5p, miR-499b-3p, miR-296-3p, miR-552-3p, miR-504-5p, miR-130b-5p, miR-500, miR-874-5p, miR-129-5p, novel\_74, miR-664a-5p, miR-30a-3p, miR-30e-3p, miR-2285j, let-7b-3p, miR-224-5p, miR-98-3p, miR-769-5p, miR-665-5p, miR-3074-5p, miR-129-2-3p, miR-433-5p, miR-188-5p, miR-3432b, miR-16-1-3p, miR-450c-3p, miR-223-3p, miR-432, miR-149-5p, novel\_116, miR-412-5p, miR-339-5p, miR-103a-3p, miR-31-5p, miR-378a-5p, miR-196b-5p, miR-194a, miR-2411-3p, miR-105-5p, miR-146a, miR-503-3p, let-7a-2-3p, let-7j, miR-2285r, miR-628-5p, miR-6240, miR-493-5p, miR-2319a, miR-146b-5p, miR-412-3p, miR-3591-3p, miR-3970, miR-150-5p, miR-669, miR-320c, novel\_69, miR-411b-3p, miR-299b-3p, miR-3120-3p, miR-26b-5p, miR-3074-5p, miR-329-5p, miR-206, miR-125-5p, miR-185-3p, miR-576-3p, miR-28c, miR-199b-

STAT4      ENSOARGO0 signal t

miR-27a-3p, miR-378e, miR-499b-5p, miR-452-3p, miR-3064-5p, novel\_94, miR-129b-5p, miR-199b-5p, miR-361-3p, miR-219a-2-3p, miR-194b-5p, miR-452-5p, miR-2285f, miR-212-3p, miR-3059-5p, novel\_60, miR-2284q, miR-769-5p, miR-9788-3p, miR-27a-3p, novel\_4, miR-2300a-5p, miR-3120-5p, miR-450b-5p, miR-378c, miR-378b, miR-758-3p, miR-4532, miR-30c-1-3p, miR-3955-3p, miR-3085-3p, miR-326, novel\_115, miR-155-5p, miR-22-3p, miR-193b-3p, miR-6130, miR-192-5p, miR-370-5p, miR-660-5p, miR-378a-3p, miR-2312, miR-21a-3p, miR-6134, miR-2330-3p, miR-145a-3p, miR-4510, miR-378c, miR-664a, miR-155-5p, miR-17-3p, miR-450b-3p, miR-29b-2-5p, miR-320e, miR-19b-1-5p, miR-324-3p, miR-132-5p, miR-616-3p, miR-487a-3p, miR-485-3p, miR-378d, miR-19b-3p, miR-140-3p, miR-5703, miR-1193, miR-2300b-3p, miR-215-5p, miR-2408, novel\_133, miR-146a-5p, miR-125b-2-3p, miR-29b-1-5p, miR-183-5p, miR-21-3p, miR-30b-3p, miR-216a-5p, miR-196a-3p, miR-29a-3p, miR-378b, miR-9851-3p, miR-19a-3p, miR-450b-3p, miR-18a-3p, miR-2285ab, miR-2428, miR-326-3p, miR-24-3p, miR-495-3p, miR-17-3p, miR-2285x, miR-1193, miR-502b, miR-147-5p, miR-22-5p, miR-382-5p, miR-544b, miR-2355-3p, miR-133b-5p, miR-138, miR-380-3p, miR-29b, miR-2284ab, miR-145a-5p, miR-194-5p, miR-1434-3p, miR-1285, miR-873a-5p, miR-345-5p, miR-539-3p, miR-654-3p, miR-382, miR-466f-3p, miR-1343-5p, miR-660, miR-330-3p, miR-197-5p, miR-199a-5p, miR-769, miR-374c-3p, miR-615-5p, miR-141-3p, miR-215-5p, miR-7144-5p, miR-3154, miR-378c, miR-365a-5p, miR-486b-3p, miR-410-3p, miR-138-5p, miR-409-3p, miR-1306-3p, miR-370-5p, miR-29b-3p, miR-214-5p, miR-378h, miR-1271-5p, miR-582-3p, miR-218-2-3p, miR-29d-3p, miR-199a-5p, miR-2478, miR-29b-2-5p, miR-3529-3p, miR-2898, miR-17-3p, miR-217, miR-30c-2-3p, miR-4443, miR-203-3p, miR-378g, miR-3596, miR-2319b, miR-1709, miR-1082, miR-9-3p, miR-335-3p, miR-504, miR-96-5p, miR-106a, miR-2404, miR-25, miR-3578, miR-93-5p, miR-17-5p, miR-1388-3p, miR-106a-5p, miR-20a, miR-93, miR-29a-5p, miR-20a-5p, novel\_17, miR-216a-5p, miR-17-5p, miR-106b-5p, miR-106a

TCEA1

ENSOARGO(A transcri

AKAP7

ENSOARGO(A kinase

miR-101-3p, miR-218-5p, miR-154-3p, miR-490-5p, miR-2285t, miR-181d-5p, miR-2284j, miR-2285f, miR-877-3p, miR-378j, miR-381-3p, miR-129b-5p, miR-361-3p, miR-493-5p, miR-668-5p, miR-7689-3p, miR-499b-5p, miR-374b-5p, miR-2284g, miR-499a-3p, miR-25, miR-106b-5p, miR-16b, miR-323b-3p, novel\_115, miR-1185-5p, miR-2284b, miR-106a-5p, miR-424-5p, miR-494-3p, miR-1b-5p, miR-193a, miR-125b-2-3p, miR-323b, miR-143-5p, miR-6529a, miR-21b, miR-101c, miR-1839-5p, miR-299a-5p, miR-544a, miR-101a-5p, miR-409b, miR-548w, miR-421, miR-3604, miR-655-3p, let-7b-3p, miR-208b-5p, miR-424-5p, miR-665-5p, miR-3184-3p, miR-181c-5p, miR-122-5p, miR-224-5p, miR-98-3p, miR-655, let-7f-1-3p, miR-21a-3p, miR-186-5p, miR-582-5p, miR-154b-3p, let-7g-3p, miR-2312, miR-552-3p, miR-154a-3p, miR-2331-3p, miR-15b-5p, miR-877-5p, miR-499b-3p, miR-544-3p, miR-192-5p, miR-377-3p, miR-582-5p, miR-125b, miR-500a-5p, miR-2285p, miR-618, miR-374a-5p, miR-299-3p, miR-30b-3p, miR-466i-5p, miR-2284m, miR-106a, miR-202-5p, miR-20a, miR-2285w, miR-487a, miR-130a-5p, miR-217-5p, miR-98-3p, miR-215-5p, miR-1246, miR-361-5p, miR-2284u, let-7a-3p, miR-33b-3p, novel\_73, miR-485-3p, miR-106a, miR-18a-3p, miR-2284h-5p, miR-15a-5p, miR-487a-3p, novel\_87, miR-16a, miR-20a-5p, miR-4324, miR-15a, miR-147-5p, miR-2285x, miR-18a-3p, miR-2285ab, miR-195a-5p, miR-19a-3p, miR-1291, miR-411b-3p, miR-299b-3p, miR-2404, miR-17-5p, novel\_51, miR-106a-5p, miR-377-3p, miR-224-5p, miR-125a-5p, miR-101-5p, miR-493-5p, let-7a-2-3p, miR-539-3p, novel\_23, miR-1843b-5p, miR-542-3p, miR-181a-5p, miR-2113, miR-653, miR-708-3p, miR-188-5p, miR-2284x, miR-497-5p, miR-16b, miR-2284ab, miR-26b-3p, miR-665, miR-544b, miR-20b, miR-2285g, miR-2284d, miR-409-3p, miR-125b-5p, miR-100-3p, miR-2284k, miR-331-5p, miR-16-5p, miR-2284v, miR-374b, miR-



miR-200b-3p, miR-88b-3p, miR-2285ad, miR-429-3p, miR-6517, miR-214-5p, miR-9-5p, miR-505-5p, miR-322-5p, miR-6516-5p, miR-2411-5p, miR-217, miR-1260a, miR-200c, miR-107, miR-2898, miR-200c-3p, miR-29b-2-5p, miR-3065-3p, miR-1271-3p, miR-490-3p, miR-2285b, miR-148b-5p, miR-93-5p, miR-320a, miR-7144-5p, miR-10b-3p, miR-329a, miR-345-5p, miR-542-5p, miR-615-5p, miR-1271, miR-574-5p, miR-874-3p, miR-324-5p, miR-154b-5p, miR-331-3p, miR-3969, miR-2433, miR-410-5p, miR-135a-1-3p, miR-486b-3p, miR-28-5p, miR-138-5p, miR-6128, miR-193a-5p, miR-16-5p, miR-103b, miR-1306-5p, miR-365a-5p, miR-93, miR-1260b, miR-1434-3p, miR-7b-5p, miR-542-3p, miR-223-3p, miR-2113, miR-497-5p, miR-26a-2-3p, miR-744-5p, miR-188-5p, miR-455-5p, miR-138, miR-16b, miR-1260b, miR-377-5p, miR-103a-3p, miR-194-3p, miR-103, miR-20b, miR-185-5p, miR-197-5p, miR-365b-5p, miR-106a-5p, miR-17-5p, miR-455-5p, miR-7-5p, miR-296-3p, miR-668-3p, miR-363-5p, miR-296-3p, let-7j, miR-345-5p, miR-432-3p, miR-3591-3p, miR-379-5p, miR-6395, miR-195a-5p, miR-410-5p, miR-1291, miR-107, miR-3120-3p, miR-320c, miR-146b-3p, miR-670-3p, miR-16a, miR-15a, miR-20a-5p, miR-142b, miR-576-3p, miR-656-5p, miR-22-5p, miR-502b, novel\_101, miR-335-5p, miR-2428, miR-323c, miR-24-3p, miR-1197-5p, miR-217-5p, miR-188-3p, miR-5703, novel\_133, miR-362-3p, miR-148a-5p, miR-4429, miR-212-5p, miR-1247-5p, miR-2284h-5p, miR-328-3p, miR-7859, miR-200b, miR-222-5p, miR-15a-5p, miR-324-3p, miR-196a-3p, novel\_17, miR-320d, miR-466i-5p, miR-369-3p, miR-20a, miR-2285w, miR-2411, miR-2424, miR-486-3p, miR-376a-5p, miR-142a-3p, miR-377-5p, miR-129b-3p, miR-655, miR-21a-3p, miR-885-3p, miR-1827, miR-345-5p, miR-21-3p, miR-3065-3p, miR-182-5p, miR-296-3p, miR-204-3p, novel\_32, novel\_25, miR-15b-5p, miR-6516, miR-2284c, miR-27a-5p, miR-6130, miR-324-3p, miR-

miR-378a-5p, miR-330-3p, miR-190a, miR-2411-3p, miR-296-3p, miR-146a, miR-296-3p, miR-503-3p, miR-363-5p, miR-380-5p, miR-6240, miR-497-5p, miR-380-3p, miR-16b, miR-16-1-3p, miR-219a-1-3p, miR-22-3p, miR-197-3p, miR-19b-2-5p, miR-412-5p, miR-185-5p, miR-26b-3p, miR-31-5p, miR-656-5p, miR-147-5p, miR-16a, miR-4324, miR-15a, miR-133a-5p, miR-6402, miR-142b, miR-326-3p, miR-2428, miR-24-3p, miR-758-5p, novel\_101, miR-2319a, miR-146b-5p, miR-195a-5p, miR-378f, miR-6516-3p, miR-450b-3p, miR-3591-3p, miR-669, miR-146b-3p, miR-323a-5p, miR-299b-3p, novel\_69, novel\_68, miR-329-5p, miR-3074-5p, miR-543-5p, miR-2898, miR-450a-2-3p, miR-6536, miR-30c-2-3p, miR-217, miR-490-3p, miR-2285b, miR-380-5p, miR-30a-3p, miR-29b-2-5p, miR-218-2-3p, miR-330-5p, miR-345-3p, miR-322-5p, miR-2411-5p, miR-378h, miR-299a-3p, miR-592, miR-6740-5p, miR-331-3p, miR-378c, miR-145-3p, miR-6128, miR-16-5p, novel\_48, miR-485-5p, miR-2318, miR-329b, miR-2448-3p, miR-133c, miR-769, miR-2355-5p, miR-542-5p, miR-146b, miR-29b-1-5p, miR-2957, miR-182-5p, miR-16b, miR-199a-3p, miR-326, miR-3187-3p, miR-378d, miR-30c-1-3p, miR-1388-3p, miR-424-5p, miR-494-3p, miR-378c, miR-2426, miR-3962, miR-6529a, miR-378b, miR-148b-5p, miR-142-5p, miR-1298-3p, miR-147a, miR-1343-3p, novel\_4, miR-330-3p, miR-2285t, miR-3958-3p, miR-769-5p, miR-8095, miR-7705, miR-190b-5p, novel\_60, miR-3956-3p, miR-504, miR-378e, miR-541-5p, miR-299-3p, miR-21-3p, miR-500a-5p, miR-345-3p, miR-185-3p, miR-92a-1-5p, miR-422a, miR-210-5p, miR-146a-5p, miR-2411, miR-2424, miR-380-3p, miR-29b-1-5p, miR-130a-5p, miR-216c-5p, miR-329a-5p, miR-16-1-3p, miR-148a-5p, miR-2904, miR-1197-5p, miR-5703, miR-378a-3p, miR-217-5p, miR-378i, miR-1246, miR-2300b-3p, miR-199a-3p, novel\_83, miR-222-5p, miR-15a-5p, miR-380-5p, miR-30d-3p, miR-548a-3p, miR-424-5p, miR-4492, miR-190a-5p, miR-330-5p, miR-140-3p, miR-30b-3p, miR-1343-5p, miR-193b-5p, miR-1246, miR-2300b-3p, miR-296-5p, miR-30b-3p, miR-380-5p, miR-330-3p, miR-3960, miR-483-3p, miR-185-5p, miR-425-3p, miR-330-3p, miR-146a, miR-326, miR-1343-5p, miR-146b, miR-483-3p, miR-2403, miR-6240, miR-486-3p, novel\_39, miR-146a-5p, miR-2285i, miR-129b-3p, miR-146b-5p, miR-2285k, miR-504, miR-1291, miR-7977, miR-504-5p, miR-154b-5p, miR-6535, miR-27a-5p, miR-146b-3p, miR-2433, miR-486b-3p, miR-335, miR-4726-5p, miR-758-5p, miR-3957-3p, miR-335-5p, miR-326-3p, miR-1193, miR-2447, miR-2411, miR-122-5p, miR-196a-3p, miR-370-5p, miR-2440, miR-377-3p, miR-370-5p, miR-1343-3p, miR-204-3p, miR-4443, miR-377-3p, miR-411b-3p, miR-2411-5p, miR-216a-3p, miR-128-3p, miR-1827

IL17A ENSOARGOC interleu

SPPL2B ENSOARGOC signal p

RABGAP1 ENSOARGOC RAB GTPa

miR-7134-3p, miR-490-5p, miR-301a-5p, miR-107-5p, miR-769-5p, miR-2440, miR-219a-2-3p, miR-154a, miR-194b-5p, miR-181d-5p, miR-363-3p, miR-212-3p, novel\_94, miR-335-3p, miR-136-5p, miR-378j, miR-221, miR-140-5p, miR-27a-3p, miR-3082-5p, miR-378e, miR-3596, miR-7977, miR-211-5p, miR-20a-3p, miR-452-3p, miR-2319b, miR-4792, miR-103a-2-5p, miR-214-3p, miR-487b-5p, miR-16b, novel\_115, miR-342, miR-758-3p, miR-4532, miR-30c-1-3p, miR-378d, let-7c-3p, miR-424-5p, miR-382-3p, miR-101b-3p, miR-574-3p, miR-3120-5p, miR-101c, miR-378c, miR-1388-5p, miR-30b-3p, miR-758-3p, miR-1a-3p, miR-301b-5p, miR-378b, miR-216a-3p, miR-455-3p, miR-221-3p, miR-2320-3p, miR-147a, miR-27a-3p, miR-222-5p, miR-5010-3p, miR-199b-3p, novel\_4, miR-151a-3p, miR-708-5p, miR-424-5p, miR-208b-5p, miR-664a, miR-324-3p, miR-151-3p, miR-222-3p, miR-181c-5p, miR-338-3p, miR-206-3p, miR-769-5p, miR-214, miR-3074-2-3p, miR-4510, miR-539-5p, miR-378c, miR-1827, miR-543-3p, miR-885-3p, miR-345-5p, miR-339b, miR-18a-5p, let-7g-3p, miR-129b-3p, miR-15b-5p, miR-6130, miR-377-3p, miR-221-5p, miR-30c-1-3p, miR-378a-3p, miR-32-5p, miR-221-5p, miR-466i-5p, miR-125b, miR-422a, miR-500a-5p, miR-2424, miR-378a-3p, miR-217-5p, miR-5703, miR-2904, miR-2300b-3p, miR-2366, miR-378i, miR-532-3p, miR-15a-5p, miR-487a-3p, miR-7859, miR-485-3p, miR-3600, miR-18a-3p, miR-199c, miR-29a, miR-206, miR-379-3p, miR-92a-3p, miR-16a, miR-6529b, miR-28c, miR-15a, miR-2284w, miR-24-3p, miR-211, novel\_101, miR-29c-3p, miR-342-3p, miR-378f, miR-195a-5p, miR-9851-3p, miR-216a-3p, miR-18a-3p, miR-18b, miR-6535, novel\_69, miR-374c-3p, miR-29a-3p, miR-125a-5p, miR-378a-5p, miR-124-5p, novel\_51, miR-194a, miR-32, miR-377-3p, miR-296-3p, miR-7-5p, miR-345-5p, let-7j, miR-296-3p, miR-539-3p, miR-22841, miR-432-3p, miR-2285r, miR-132-3p, miR-27b-3p, miR-197-5p, miR-30b-3p, miR-144-5p, miR-10a, miR-2285aa, miR-10a-5p, miR-504-5p, miR-1277-3p, miR-548o-3p, miR-376c-5p, miR-3074-1-3p, miR-135b-5p, miR-10b-3p, miR-504, let-7g-3p, miR-376c-5p, miR-3154, miR-433-3p, miR-376b-5p, miR-122-5p, miR-10b-5p, miR-206-3p, miR-144-5p, miR-147-5p, miR-4726-5p, novel\_1, miR-206, miR-135a-5p, miR-135a-1-3p, miR-7859, miR-2411-5p, miR-10a-5p, miR-361-5p, miR-1197-5p, miR-10b, miR-2411, miR-8485, miR-101b-3p, miR-378a-5p, novel\_115

GLB1L3 ENSOARGO(galactos

GATA3 ENSOARGO(GATA bin

miR-429-3p, miR-6517, miR-483-3p, novel\_121, miR-129-1-3p, miR-486-5p, miR-29d-3p, miR-23b-5p, miR-200b-3p, miR-495-5p, miR-181a-2-3p, miR-4286, miR-28b, miR-450b-5p, miR-3065-3p, miR-2285b, miR-450c-5p, miR-200c, miR-3071-3p, miR-30c-2-3p, miR-17-3p, miR-200c-3p, novel\_96, miR-542-5p, miR-370-3p, miR-2285aa, miR-365a-3p, miR-769, miR-345-5p, miR-671-5p, miR-1306-5p, miR-193a-5p, miR-365a-5p, miR-29b-3p, miR-410-5p, miR-135a-1-3p, miR-135a-5p, miR-592, miR-486b-3p, miR-31-5p, miR-340-3p, miR-377-5p, miR-185-5p, novel\_116, miR-544b, miR-7b-5p, miR-145a-5p, miR-30b-3p, miR-29b, miR-380-3p, miR-744-5p, miR-27b-3p, miR-2889, miR-345-5p, miR-503-3p, miR-7-5p, miR-365b-5p, miR-3141, miR-197-5p, miR-2285v, miR-483-3p, miR-2285l, miR-452-5p, miR-3074-5p, miR-3120-3p, miR-29a-3p, novel\_69, miR-670-3p, miR-6535, miR-3141, miR-3970, miR-450b-3p, miR-19a-3p, miR-379-5p, miR-135b-5p, miR-29c-3p, miR-542-5p, miR-17-3p, miR-2285x, miR-374c-5p, miR-2428, miR-502-5p, miR-28c, miR-29a, miR-656-5p, miR-147-5p, miR-548e-3p, miR-3600, miR-7859, miR-222-5p, miR-200b, novel\_133, miR-5703, miR-140-3p, miR-19b-3p, miR-664-5p, miR-29b-1-5p, miR-377-5p, miR-486-3p, miR-380-3p, miR-143-3p, miR-542-5p, miR-30b-3p, miR-30c-1-3p, miR-548o-3p, miR-3065-3p, miR-341-3p, miR-544-3p, novel\_25, miR-204-3p, miR-129b-3p, let-7g-3p, miR-345-5p, miR-625-5p, miR-129-2-3p, miR-3074-5p, miR-769-5p, miR-6525, miR-3184-5p, miR-151-3p, miR-132-5p, miR-665, miR-320e, miR-17-3p, miR-874-5p, miR-1343-3p, novel\_4, miR-151a-3p, miR-27a-3p, miR-145b, miR-484, miR-296-5p, miR-30b-3p, miR-1388-5p, miR-544a, miR-1388-3p, miR-382-3p, let-7c-3p, miR-30c-1-3p, miR-4532, miR-193a, miR-5126, miR-29b-1-5p, novel\_19, miR-491-5p, miR-25-5p, miR-103a-2-5p, miR-542-5p, miR-452-3p, miR-7689-3p, miR-27a-3p, miR-361-3p, miR-877-3p, miR-3050-5p, miR-2117, miR-212-3p, miR-329a, miR-7-1-3p, miR-660-5p, miR-203-3p, miR-411-5p, miR-545-5p, miR-486-5p, miR-3596, miR-1434-5p, miR-3065-5p, miR-329-3p, miR-1298-5p, miR-362-3p, let-7g-3p, miR-362-3p, miR-329a, novel\_101, miR-885-5p, novel\_27, miR-2284w, miR-154a, miR-24-3p, miR-362-3p, miR-205-5p, novel\_82, miR-196a-3p, miR-660, novel\_1, miR-6536

miR-2285ad, miR-758-5p, miR-450a-1-3p, miR-134-5p, miR-582-3p, miR-134, miR-2366, miR-3578, miR-345-3p, miR-5703, miR-29d-3p, miR-128-3p, miR-664-5p, miR-664b-3p, miR-2478, miR-199a-5p, novel\_39, miR-146a-5p, miR-219-3p, miR-345-3p, miR-216a-5p, miR-127-5p, miR-181b-5p, miR-17-3p, miR-221-5p, miR-874-3p, miR-32-3p, miR-221-5p, miR-504-5p, miR-656-3p, miR-139-5p, miR-199a-5p, miR-204-3p, miR-450a-1-3p, miR-3154, miR-345-5p, miR-345-5p, miR-1248, miR-3184-3p, miR-2330-3p, miR-181c-5p, miR-135a-1-3p, miR-2284k, miR-410-5p, miR-29b-3p, miR-338-5p, miR-3969, miR-219b-3p, miR-6516-3p, miR-17-3p, miR-450b-3p, miR-130b-5p, miR-134-5p, miR-539-5p, miR-9788-3p, miR-455-3p, miR-542-3p, miR-223-3p, miR-181a-5p, miR-3071-5p, miR-758-3p, miR-323b, miR-450c-3p, miR-29b, miR-101b-3p, miR-130b-5p, miR-33a-5p, miR-432-3p, miR-2285r, miR-432-3p, miR-345-5p, miR-758-3p, miR-146a, miR-2331-5p, miR-2411-3p, miR-323b-3p, miR-124-5p, miR-199b-5p, miR-146b, miR-139-5p, miR-29a-3p, miR-199b-5p, miR-3065-5p, miR-129b-5p, miR-216a-3p, miR-504, miR-450b-3p, novel\_94, miR-6516-3p, miR-146b-5p, miR-335-3p, miR-2319a, miR-2447, novel\_120, miR-32-3p, miR-181d-5p, miR-29c-3p, miR-17-3p, miR-219a-2-3p, miR-199b-5p, miR-1285-5p, novel\_27, miR-4324, miR-2285n, miR-33a-3p, miR-2285y, miR-29a, miR-147-5p, miR-2285t, miR-381-3p, miR-301, miR-3154, miR-876-3p, miR-48b-5p, miR-2285aa, miR-141-3p, miR-300-3p, miR-199a-5p, miR-494-5p, miR-331-3p, miR-144, miR-409-3p, miR-204-5p, miR-2284v, miR-193a-5p, miR-196a-5p, miR-1290, miR-411-3p, miR-300, miR-582-3p, miR-105-2, miR-200b-3p, miR-128-3p, let-7a-2-3p, miR-429-3p, miR-431, miR-1271-5p, miR-6516-5p, miR-205-5p, miR-200c, miR-30c-2-3p, miR-217, miR-200c-3p, miR-200a-3p, novel\_127, miR-30a-3p, miR-200a, miR-199a-5p, miR-1306, miR-150-5p, miR-216a-3p, miR-18a-3p, miR-216b-3p, miR-655-5p, miR-7-1-3p, miR-144-3p, miR-677, miR-181b-3p, novel\_87, miR-379-3p, miR-199c, miR-147-5p, miR-211, miR-323c, miR-374c-5p, miR-199b-5p, miR-2284w, miR-873a-5p, miR-1434-3p, miR-194-5p, miR-16-1-3p, miR-27b-3p, miR-7862, miR-2889, miR-133b-5p, miR-26b-3p, miR-2284d, miR-6238, miR-377-3p, miR-105-5p, novel\_51, miR-194a, miR-196b-5p, miR-106b-3p, let-7f-2-3p, let-7f-2-3p, miR-654-3p, let-7a-2-3p, miR-503-3p, miR-21a-3p, miR-411, miR-487b-5p, miR-30c-1-3p, miR-140-5p, miR-2331-3p, miR-545-3p, miR-548o-3p, miR-6516, miR-139-5p, miR-216b-5p, novel\_32, miR-30a-3p, miR-3604, miR-6516-3p, miR-664a, miR-1468-5p, miR-129-5p, miR-539-5p, miR-1271, miR-665-5p, miR-3074-2-3p, miR-217-5p, miR-5703, miR-142-3p, miR-16-1-3p, miR-18a-3p, miR-30d-3p, miR-95-3p, miR-7859, miR-200b, novel\_83, miR-199a-3p, miR-1247-5p, novel\_17, miR-216a-5p, miR-324-3p, miR-2484, miR-183-5p, miR-664b-3p, miR-181b-1-3p, miR-140-5p, miR-199b-5p, miR-129b-5p, miR-96-5p, miR-299b-5p, miR-136-5p, miR-139-5p, miR-20a-3p, miR-211-5p, miR-3082-5p, miR-489, miR-203-3p, miR-27a-3p, miR-1185-2-3p, miR-101-3p, miR-301a-5p, miR-490-5p, miR-452-5p, miR-194b-5p, miR-877-3p, miR-154a, miR-301b-5p, miR-101a-5p, miR-450b-5p, miR-105-1, miR-199b-3p, miR-5010-3p, miR-181b-2-3p, miR-27a-3p, miR-147a, miR-148b-5p, miR-

AFP

ENSOARGO( alpha-fe

ZEB1

ENSOARGO( zinc fin

miR-208b-5p, miR-450b-3p, miR-155-5p, miR-6516-3p, miR-17-3p, miR-665, let-7b-3p, miR-338-3p, miR-181c-5p, miR-6525, miR-98-3p, miR-206-3p, miR-214, miR-539-5p, miR-378c, miR-3184-3p, novel\_99, miR-186-5p, miR-2312, miR-411, miR-487b-5p, let-7f-1-3p, miR-450a-1-3p, novel\_25, miR-155-5p, miR-544-3p, miR-377-3p, miR-499b-3p, miR-139-5p, miR-216b-3p, miR-182-5p, miR-378a-3p, miR-2331-3p, miR-504-5p, miR-496-3p, miR-32-3p, miR-1277-5p, miR-21-3p, miR-106a, miR-320d, miR-2284m, miR-216a-5p, miR-422a, miR-345-3p, miR-196a-3p, miR-618, miR-376a-5p, miR-20a, miR-345-3p, miR-329a-5p, miR-133a-3p, miR-218-1-3p, let-7a-3p, miR-4429, miR-98-3p, miR-124-3p, miR-378a-3p, miR-378i, miR-23b-3p, miR-487a-3p, miR-23c, miR-106a, miR-499a-5p, miR-335, miR-450a-5p, miR-2285n, miR-502-3p, miR-2285f, miR-194b-5p, miR-2284j, miR-181d-5p, miR-32-3p, miR-212-3p, miR-9-3p, miR-504, miR-136-5p, miR-378j, miR-381-3p, miR-129b-5p, miR-144-5p, miR-203-3p, miR-27a-3p, miR-500-3p, miR-1185-2-3p, miR-378e, miR-499a-3p, miR-2483-3p, miR-139-5p, miR-214-3p, miR-106b-5p, miR-182-5p, miR-320b, miR-342, novel\_115, miR-378d, miR-23a-3p, miR-33a-5p, miR-124a, miR-2330-5p, miR-106a-5p, miR-101c, miR-378c, miR-544a, miR-1a-3p, miR-501-3p, miR-6529a, miR-378b, miR-9788-3p, miR-455-3p, miR-421, miR-1185-3p, miR-2459, miR-27a-3p, miR-181b-2-3p, miR-105-1, miR-548w, miR-409b, miR-134-5p, miR-767-5p, novel\_9, miR-144, miR-135a-5p, miR-409-3p, miR-410-5p, novel\_63, miR-2284k, miR-135a-1-3p, miR-494-5p, miR-378c, miR-365a-5p, miR-93, miR-6128, miR-144-5p, miR-1306-5p, miR-376c-5p, miR-20b-5p, miR-3074-1-3p, miR-190a-3p, miR-767, miR-10b-3p, miR-2318, miR-200a-5p, miR-93-5p, miR-137-3p, miR-17-5p, miR-376c-5p, miR-320a, miR-301, miR-324-5p, miR-2284n, miR-874-3p, miR-503-3p, miR-450a-2-3p, miR-17-3p, miR-181b-5p, miR-6536, miR-205-5p, miR-125a-3p, miR-129-5p, novel\_74, miR-1306-3p, miR-2285n, miR-2285j, miR-181c-5p, miR-8095, novel\_111, miR-181d-5p, miR-671-5p, miR-186-5p, miR-129b-5p, miR-1306-3p, miR-2285u, miR-541-5p, miR-30c-1-3p, miR-3653-3p, miR-181b-5p, miR-30c-2-3p, miR-330-3p, miR-654-3p, miR-30c-1-3p, miR-382, miR-6240, miR-450b-5p, miR-7857, miR-181a-5p, miR-1285, miR-2355-3p, miR-411-5p, miR-222-5p, miR-330-3p, miR-548w, miR-31-5p

miR-141-3p, miR-615-5p, miR-235b-5p, miR-376c-3p, miR-2284n, miR-199a-5p, miR-331-5p, miR-362-5p, miR-200a-5p, miR-381-3p, miR-1248, miR-671-5p, miR-329a, miR-876-3p, miR-2474, miR-16-5p, miR-3607-3p, miR-378c, miR-500b-5p, miR-2332, miR-1-5p, miR-2284k, miR-204-5p, miR-196a-2-3p, miR-429-3p, novel\_121, miR-545-5p, miR-450a-1-3p, miR-378h, miR-322-5p, miR-1343-5p, miR-345-3p, miR-200b-3p, miR-300, miR-181a-2-3p, miR-4286, miR-30a-3p, miR-3529-3p, miR-1271-3p, miR-199a-5p, miR-3065-3p, miR-28b, miR-450b-5p, miR-30f, miR-125a-3p, miR-200c, miR-2285af, novel\_127, miR-200a-3p, miR-1a-2-5p, miR-200c-3p, miR-6536, miR-450a-2-3p, miR-17-3p, miR-3074-5p, miR-6535, miR-3065-5p, miR-18a-3p, miR-505-3p, miR-6395, miR-378f, miR-19a-3p, miR-450b-3p, miR-2285x, miR-17-3p, miR-193b-3p, miR-1a-1-5p, miR-199b-5p, miR-374c-5p, miR-323c, miR-3959-3p, miR-211, miR-382-5p, miR-33a-3p, miR-16a, miR-28c, miR-133a-5p, miR-576-3p, miR-15a, miR-625-3p, miR-421-5p, miR-133b-5p, miR-194-3p, miR-3431, miR-2284d, miR-374b-3p, miR-3071-5p, miR-450c-3p, miR-873a-5p, miR-2284x, miR-455-5p, miR-497-5p, miR-16-1-3p, miR-16b, miR-382, miR-2483-5p, miR-101-5p, miR-493-5p, miR-455-5p, miR-2411-3p, miR-377-3p, miR-224-5p, miR-193a-3p, miR-1343-5p, miR-2285l, miR-552-3p, miR-532-5p, miR-3065-3p, miR-221-5p, miR-378a-3p, miR-2331-3p, miR-15b-5p, novel\_25, miR-204-3p, miR-216b-5p, miR-6130, miR-193b-3p, miR-376e-3p, miR-377-3p, miR-129b-3p, miR-27b-5p, miR-450a-1-3p, novel\_99, miR-543-3p, let-7g-3p, miR-425-5p, miR-4510, miR-3074-5p, miR-539-5p, miR-378c, miR-224-5p, miR-6525, miR-30a-3p, miR-324-3p, miR-30e-3p, miR-2285j, miR-874-5p, miR-424-5p, miR-17-3p, miR-487b-5p, miR-450b-3p, miR-505-3p, miR-212-5p, miR-1b-3p, miR-3960, miR-18a-3p, miR-328-3p, miR-671-3p, miR-532-3p, miR-15a-5p, miR-200b, miR-487a-3p, miR-1107-5p, miR-378a-

miR-1306-5p, miR-6128, miR-374a-3p, miR-93, miR-378c, miR-370-5p, miR-2332, miR-551b-3p, miR-34c-3p, miR-331-3p, miR-767-5p, miR-374b-3p, miR-28-5p, miR-486b-3p, miR-487a-3p, miR-769, miR-17-5p, miR-3154, miR-320a, let-7g-3p, miR-485-5p, novel\_48, miR-1, miR-181b-5p, miR-92a-3p, miR-378h, miR-302a-5p, miR-214-5p, miR-134, miR-345-3p, miR-30a-5p, miR-501-3p, miR-128-3p, miR-342-3p, novel\_101, miR-495-3p, miR-1193, miR-2428, miR-20a-5p, miR-6402, miR-92a-3p, miR-147-5p, miR-22-5p, miR-18a-3p, miR-378b, miR-450b-3p, miR-345-5p, miR-136-3p, miR-106a-5p, miR-17-5p, miR-130a-3p, miR-185-5p, miR-2284d, miR-20b, miR-1434-3p, miR-181a-5p, miR-873a-5p, miR-219a-1-3p, miR-2284ab, miR-30b-3p, miR-7862, miR-378c, miR-539-5p, miR-425-5p, miR-206-3p, miR-6134, miR-320e, miR-324-3p, miR-664a, miR-708-5p, miR-545-3p, miR-378a-3p, miR-370-5p, miR-21-3p, miR-877-5p, miR-22-3p, novel\_25, miR-21a-3p, miR-154b-3p, miR-30f, let-7g-3p, miR-216c-5p, miR-20a, miR-146a-5p, miR-320d, miR-106a, miR-30d, miR-3600, miR-148b-3p, miR-2300b-3p, miR-5703, miR-2904, miR-124-3p, miR-4429, miR-378d, novel\_60, miR-4454, miR-181d-5p, miR-502-3p, miR-30b-5p, miR-2285n, miR-371a-5p, miR-769-5p, miR-2285y, miR-335, miR-4726-5p, miR-374a-3p, miR-452-3p, miR-7977, miR-499b-5p, miR-3082-5p, miR-378e, miR-361-3p, miR-129b-5p, miR-494-3p, miR-106a-5p, let-7c-3p, miR-1306-5p, miR-342, miR-320b, miR-3955-3p, miR-216a-3p, miR-9788-3p, miR-6529a, miR-378b, miR-30b-3p, miR-2426, miR-378c, miR-3120-5p, miR-2284aa, miR-2284v, miR-1197-3p, miR-2284k, novel\_63, miR-191-5p, miR-134-5p, miR-874-3p, miR-3068-3p, miR-1271, miR-2355-5p, miR-25-3p, miR-30e-5p, miR-93-5p, miR-200a-5p, miR-345-5p, miR-329b, miR-876-3p, miR-767, miR-1248, miR-20b-5p, miR-92b-3p, miR-2285b, novel\_39, novel\_127, miR-152-3p, miR-2285ad, miR-134-3p, miR-338-5p, miR-135a-5p, miR-330-3p, miR-3955-3p, miR-664a, miR-450b-3p, miR-499a-5p, miR-6240, miR-193a-5p, miR-382, miR-2428, miR-2310, miR-450a-1-3p, miR-3591-3p, miR-450c-3p, miR-19a-3p, miR-135b-5p, miR-1814c, miR-330-3p, miR-216b-3p, miR-3120-3p, miR-1b-3p, miR-21-3p, miR-6516-5p, miR-6516, miR-450a-1-3p, miR-411-5p, miR-320b, miR-30b, miR-30f, miR-105-5p, miR-345-3p, miR-2411-3p, miR-124-5p, miR-320d, miR-127-5p, miR-30d, miR-329a-5p, miR-195a-3p, miR-33a-5p, miR-432-3p, miR-432-3p, novel\_39, miR-345-3p, miR-30c-5p, miR-134, miR-2366, miR-30a-5p, miR-5703, miR-30b-3p, miR-30b-3p, miR-1388-5p, miR-582-3p, miR-4429, miR-105-2, miR-16-2-3p, miR-30c, miR-496, miR-31-5p, miR-1343-3p, miR-105-1, miR-758-5p, miR-9788-3p, miR-455-3p, miR-134-5p, miR-30b-5p, miR-6740-5p, miR-3969, miR-6516-3p, miR-134-5p, miR-2285f, miR-3607-3p, miR-323-3p, miR-2285ab, miR-30e-5p, miR-3065-5p, miR-3154, miR-30d-5p, miR-320a, miR-2312, miR-2318, miR-504, miR-6516-3p, miR-504-5p, miR-503-3p, miR-496-3p, miR-329-5p, miR-7-1-3p, miR-320c, miR-1306, miR-29d-3p, miR-29b, miR-504, miR-504-5p, miR-3065-3p, miR-2355-5p, miR-29a-3p, miR-670-3p, miR-214-5p, miR-29b-3p, miR-1306-5p, miR-331-3p, miR-29a, miR-29c-3p, miR-361-3p, miR-4532, miR-3065-3p

SPATA19 ENSOARGO(spermato.3p, novel\_25, miR-21a-3p, miR-154b-3p, miR-30f, let-7g-3p, miR-216c-5p, miR-20a, miR-146a-5p, miR-320d, miR-106a, miR-30d, miR-3600, miR-148b-3p, miR-2300b-3p, miR-5703, miR-2904, miR-124-3p, miR-4429, miR-378d, novel\_60, miR-4454, miR-181d-5p, miR-502-3p, miR-30b-5p, miR-2285n, miR-371a-5p, miR-769-5p, miR-2285y, miR-335, miR-4726-5p, miR-374a-3p, miR-452-3p, miR-7977, miR-499b-5p, miR-3082-5p, miR-378e, miR-361-3p, miR-129b-5p, miR-494-3p, miR-106a-5p, let-7c-3p, miR-1306-5p, miR-342, miR-320b, miR-3955-3p, miR-216a-3p, miR-9788-3p, miR-6529a, miR-378b, miR-30b-3p, miR-2426, miR-378c, miR-3120-5p, miR-2284aa, miR-2284v, miR-1197-3p, miR-2284k, novel\_63, miR-191-5p, miR-134-5p, miR-874-3p, miR-3068-3p, miR-1271, miR-2355-5p, miR-25-3p, miR-30e-5p, miR-93-5p, miR-200a-5p, miR-345-5p, miR-329b, miR-876-3p, miR-767, miR-1248, miR-20b-5p, miR-92b-3p, miR-2285b, novel\_39, novel\_127, miR-152-3p, miR-2285ad, miR-134-3p, miR-338-5p, miR-135a-5p, miR-330-3p, miR-3955-3p, miR-664a, miR-450b-3p, miR-499a-5p, miR-6240, miR-193a-5p, miR-382, miR-2428, miR-2310, miR-450a-1-3p, miR-3591-3p, miR-450c-3p, miR-19a-3p, miR-135b-5p, miR-1814c, miR-330-3p, miR-216b-3p, miR-3120-3p, miR-1b-3p, miR-21-3p, miR-6516-5p, miR-6516, miR-450a-1-3p, miR-411-5p, miR-320b, miR-30b, miR-30f, miR-105-5p, miR-345-3p, miR-2411-3p, miR-124-5p, miR-320d, miR-127-5p, miR-30d, miR-329a-5p, miR-195a-3p, miR-33a-5p, miR-432-3p, miR-432-3p, novel\_39, miR-345-3p, miR-30c-5p, miR-134, miR-2366, miR-30a-5p, miR-5703, miR-30b-3p, miR-30b-3p, miR-1388-5p, miR-582-3p, miR-4429, miR-105-2, miR-16-2-3p, miR-30c, miR-496, miR-31-5p, miR-1343-3p, miR-105-1, miR-758-5p, miR-9788-3p, miR-455-3p, miR-134-5p, miR-30b-5p, miR-6740-5p, miR-3969, miR-6516-3p, miR-134-5p, miR-2285f, miR-3607-3p, miR-323-3p, miR-2285ab, miR-30e-5p, miR-3065-5p, miR-3154, miR-30d-5p, miR-320a, miR-2312, miR-2318, miR-504, miR-6516-3p, miR-504-5p, miR-503-3p, miR-496-3p, miR-329-5p, miR-7-1-3p, miR-320c, miR-1306, miR-29d-3p, miR-29b, miR-504, miR-504-5p, miR-3065-3p, miR-2355-5p, miR-29a-3p, miR-670-3p, miR-214-5p, miR-29b-3p, miR-1306-5p, miR-331-3p, miR-29a, miR-29c-3p, miR-361-3p, miR-4532, miR-3065-3p

GABRG2 ENSOARGO( gamma-am 3p, miR-19a-3p, miR-135b-5p, miR-1814c, miR-330-3p, miR-216b-3p, miR-3120-3p, miR-1b-3p, miR-21-3p, miR-6516-5p, miR-6516, miR-450a-1-3p, miR-411-5p, miR-320b, miR-30b, miR-30f, miR-105-5p, miR-345-3p, miR-2411-3p, miR-124-5p, miR-320d, miR-127-5p, miR-30d, miR-329a-5p, miR-195a-3p, miR-33a-5p, miR-432-3p, miR-432-3p, novel\_39, miR-345-3p, miR-30c-5p, miR-134, miR-2366, miR-30a-5p, miR-5703, miR-30b-3p, miR-30b-3p, miR-1388-5p, miR-582-3p, miR-4429, miR-105-2, miR-16-2-3p, miR-30c, miR-496, miR-31-5p, miR-1343-3p, miR-105-1, miR-758-5p, miR-9788-3p, miR-455-3p, miR-134-5p, miR-30b-5p, miR-6740-5p, miR-3969, miR-6516-3p, miR-134-5p, miR-2285f, miR-3607-3p, miR-323-3p, miR-2285ab, miR-30e-5p, miR-3065-5p, miR-3154, miR-30d-5p, miR-320a, miR-2312, miR-2318, miR-504, miR-6516-3p, miR-504-5p, miR-503-3p, miR-496-3p, miR-329-5p, miR-7-1-3p, miR-320c, miR-1306, miR-29d-3p, miR-29b, miR-504, miR-504-5p, miR-3065-3p, miR-2355-5p, miR-29a-3p, miR-670-3p, miR-214-5p, miR-29b-3p, miR-1306-5p, miR-331-3p, miR-29a, miR-29c-3p, miR-361-3p, miR-4532, miR-3065-3p

PAPSS2 ENSOARGO( 3' -phosp 496, miR-31-5p, miR-1343-3p, miR-105-1, miR-758-5p, miR-9788-3p, miR-455-3p, miR-134-5p, miR-30b-5p, miR-6740-5p, miR-3969, miR-6516-3p, miR-134-5p, miR-2285f, miR-3607-3p, miR-323-3p, miR-2285ab, miR-30e-5p, miR-3065-5p, miR-3154, miR-30d-5p, miR-320a, miR-2312, miR-2318, miR-504, miR-6516-3p, miR-504-5p, miR-503-3p, miR-496-3p, miR-329-5p, miR-7-1-3p, miR-320c, miR-1306, miR-29d-3p, miR-29b, miR-504, miR-504-5p, miR-3065-3p, miR-2355-5p, miR-29a-3p, miR-670-3p, miR-214-5p, miR-29b-3p, miR-1306-5p, miR-331-3p, miR-29a, miR-29c-3p, miR-361-3p, miR-4532, miR-3065-3p

EMC10 ENSOARGO( ER membr 3p, miR-1306-5p, miR-331-3p, miR-29a, miR-29c-3p, miR-361-3p, miR-4532, miR-3065-3p



miR-489, miR-118b-2-3p, miR-126b-5p, miR-374b-5p, miR-541-5p, miR-668-5p, miR-544-5p, miR-1983, miR-493-5p, miR-129b-5p, miR-8095, miR-1285-5p, miR-212-3p, miR-181d-5p, miR-2285f, miR-628-3p, miR-2440, miR-2459, miR-1185-3p, miR-2285e, miR-455-3p, miR-9788-3p, miR-148b-5p, miR-151a-3p, miR-105-1, miR-145b, miR-16-2-3p, miR-125b-2-3p, miR-412-3p, miR-1b-5p, miR-8485, miR-106a-5p, miR-382-3p, miR-124a, miR-23a-3p, miR-3955-3p, miR-487b-5p, miR-130b-3p, miR-199a-3p, miR-106b-5p, miR-182-5p, miR-216b-5p, miR-301a-3p, miR-376e-3p, miR-377-3p, miR-155-5p, miR-548o-3p, miR-660-5p, miR-2331-3p, miR-182-5p, miR-552-3p, miR-370-5p, miR-21-3p, miR-133b-3p, miR-2312, novel\_99, miR-2285c, miR-450a-1-3p, miR-433-3p, miR-27b-5p, miR-142a-5p, miR-181c-5p, miR-3074-5p, miR-6516-3p, miR-155-5p, miR-450b-3p, miR-4492, miR-874-5p, miR-708-5p, miR-454-3p, miR-30e-3p, miR-15b-3p, miR-2285j, miR-DNAJB14 ENSOARGO(DnaJ (Hs: 664a-5p, miR-151-3p, miR-324-3p, miR-30a-3p, miR-23c, miR-200b, miR-23b-3p, miR-199a-3p, miR-2284h-5p, miR-106a, miR-30d-3p, miR-19b-3p, novel\_73, miR-34a-5p, miR-148a-5p, miR-5703, miR-1434-5p, miR-124-3p, miR-376c-3p, miR-2432, miR-2285w, miR-329a-5p, miR-20a, miR-466i-5p, miR-106a, miR-34b-5p, miR-3653-3p, miR-1277-5p, miR-2285p, miR-345-3p, miR-500a-5p, miR-411b-3p, novel\_69, miR-670-3p, miR-34b, miR-2404, miR-144-3p, miR-329-5p, miR-3074-5p, miR-216b-3p, miR-655-5p, miR-412-3p, miR-19a-3p, miR-135b-5p, miR-2285ab, miR-3591-3p, miR-3065-5p, miR-21c, miR-150-5p, miR-2428, miR-301b-3p, novel\_27, miR-449a, miR-1a-1-5p, miR-219b-3p, miR-495-3p, novel\_101, miR-1193, miR-576-3p, miR-20a-5p, miR-33a-3p, miR-34c, miR-412-5p, miR-2285g, miR-20b, miR-26b-3p, miR-665, miR-130a-3p, miR-21-5p, miR-380-3p, miR-26a-2-3p, miR-1434-3p, miR-181a-5p, miR-653, miR-145a-5p, novel\_23, miR-150c-3p, miR-2284l, miR-122-3p, miR-654-3p, let-7i, miR-miR-149-5p, miR-3065-3p, miR-29a-3p, miR-1298-3p, miR-3065-3p, miR-29c-3p, miR-145a-3p, miR-2300a-5p, miR-29b, miR-29a, miR-29d-3p, miR-2284r, miR-29b-3p, miR-2300b-3p

miR-370-5p, miR-306b-3p, miR-496-3p, miR-221-5p, miR-378a-3p, miR-877-5p, miR-204-3p, miR-544-3p, miR-6516, miR-21a-3p, novel\_99, let-7g-3p, miR-133b-3p, miR-3074-2-3p, miR-1271, miR-145a-3p, miR-378c, miR-10b-5p, miR-19b-1-5p, miR-505-3p, miR-485-3p, novel\_83, miR-616-3p, miR-148b-3p, miR-487a-3p, miR-1197-5p, miR-5703, miR-362-3p, miR-376a-5p, miR-4429, miR-5100, miR-2411, miR-21-3p, miR-221-5p, miR-760-3p, miR-320d, miR-452-3p, miR-3064-5p, miR-376d, miR-3082-5p, miR-378e, miR-877-3p, miR-219a-5p, miR-194b-5p, miR-452-5p, miR-212-3p, miR-3059-5p, miR-371a-5p, miR-335, miR-2300a-5p, miR-409b, miR-9788-3p, miR-30b-3p, miR-10b, miR-484, miR-378b, miR-3120-5p, miR-544a, miR-2426, miR-378c, miR-106a-5p, miR-30c-1-3p, miR-2957, miR-362-3p, miR-320b, miR-342, miR-3085-3p, miR-141-3p, miR-154b-5p, miR-320a, miR-3154, miR-2448-3p, miR-488-3p, miR-7144-5p, miR-23a-5p, miR-376c-5p, miR-133a-3p, miR-1306-5p, miR-145-3p, miR-378c, miR-93, miR-370-5p, miR-135a-1-3p, miR-410-5p, miR-376a-5p, miR-214-5p, miR-378h, miR-6516-5p, miR-2411-5p, miR-1271-5p, miR-24-2-5p, miR-3578, miR-134, miR-496, miR-10a-5p, miR-4286, miR-490-3p, miR-2284a, miR-1271-3p, miR-3065-3p, miR-380-5p, miR-2478, miR-217, miR-30c-2-3p, miR-376b-3p, miR-543-5p, miR-10a-5p, miR-6395, miR-505-3p, miR-376a-2-5p, miR-2285x, miR-1193, miR-342-3p, miR-2428, miR-371b-3p, miR-382-5p, miR-33a-3p, miR-20a-5p, miR-147-5p, novel\_1, miR-26b-3p, miR-544b, miR-2355-3p, miR-185-5p, miR-194-5p, miR-7862, miR-30b-3p, miR-380-3p, miR-130b-5p, miR-345-5p, miR-539-3p, miR-654-3p, miR-197-5p, miR-224-5p, miR-1343-5p, miR-452-5p, miR-552-3p, miR-216b-3p, miR-548o-3p, miR-30c-1-3p, miR-2331-3p, miR-216b-5p, miR-10a, miR-499b-3p, miR-1827, miR-345-5p, miR-214, miR-3184-3p, miR-433-5p, miR-224-5p, miR-6525, miR-130b-5p, miR-1199-5p, miR-328-3p, miR-1247-5p, miR-1434-5p, miR-

miR-330-5p, miR-615-3p, miR-885-3p, miR-412, miR-6517, miR-423-3p, miR-2285ad, miR-483-3p, miR-758-5p, miR-378h, miR-2411-5p, miR-322-5p, miR-505-5p, miR-1260a, novel\_127, novel\_96, miR-485-5p, miR-1814c, miR-345-5p, miR-615-5p, miR-874-3p, miR-374c-3p, miR-34c-5p, miR-135a-5p, miR-5100, miR-2433, miR-2284k, miR-3432a, miR-16-5p, miR-3607-3p, miR-1306-5p, miR-378c, miR-1260b, miR-323-3p, miR-374b-3p, miR-22-3p, miR-542-3p, miR-497-5p, miR-1260b, miR-30b-3p, miR-16b, miR-2284ab, miR-133b-5p, miR-31-5p, miR-187-3p, miR-149-5p, novel\_116, miR-134-3p, miR-2284d, miR-330-3p, let-7d-3p, miR-224-5p, miR-452-5p, miR-483-3p, miR-382, miR-6240, miR-345-5p, miR-2284l, miR-18a-3p, miR-150-5p, miR-6395, miR-378f, miR-195a-5p, miR-135b-5p, miR-1291, miR-3074-5p, novel\_68, miR-374c-3p, miR-34b, miR-382-5p, miR-16a, miR-34c, miR-502-5p, miR-4324, miR-15a, miR-128-1-5p, novel\_101, miR-3957-3p, miR-2428, miR-326-3p, miR-449a, miR-1197-5p, miR-378a-3p, miR-2408, miR-193b-5p, miR-378i, miR-34a-5p, miR-378d, miR-212-5p, miR-3600, miR-18a-3p, miR-328-3p, miR-532-3p, miR-671-3p, miR-15a-5p, miR-422a, miR-185-3p, miR-92a-1-5p, miR-34b-5p, miR-221-5p, miR-760-3p, miR-183-5p, miR-2411, miR-1827, miR-885-3p, miR-543-3p, miR-345-5p, miR-552-3p, miR-2331-3p, miR-221-5p, miR-504-5p, miR-378a-3p, miR-15b-5p, miR-22-3p, miR-27a-5p, miR-665, miR-320e, miR-132-5p, miR-2285j, miR-4492, miR-424-5p, miR-3074-5p, miR-378c, miR-338-3p, miR-3184-5p, miR-224-5p, miR-346, miR-6525, miR-30b-3p, miR-412-3p, miR-301b-5p, miR-296-5p, miR-378b, miR-3120-5p, miR-378c, miR-5010-3p, novel\_4, miR-2300a-5p, miR-330-3p, miR-2459, miR-1298-3p, miR-16b, miR-326, miR-103a-2-5p, miR-491-5p, novel\_124, miR-424-5p, miR-2310, miR-4532, miR-378d, miR-400-5p, miR-361-3p, miR-504, miR-4443, miR-378g, miR-378a, miR-378b, miR-27a-3p, miR-23c, miR-2285g, miR-23b-3p, miR-2285e, miR-3578, miR-19b-2-5p, miR-330-5p, miR-380-3p, miR-2284x, miR-27b-3p, miR-26a-2-3p, miR-33a-5p, miR-23a-3p, miR-2432, miR-326, miR-202-5p, miR-140-5p, miR-21-3p, miR-365a-3p, miR-27a-3p, miR-203-3p, miR-409-5p, miR-2285c, miR-2285ab, miR-3591-3p, miR-299b-5p, miR-876-3p, miR-2312, let-7e-3p, miR-1306-5p, miR-2285f, miR-326-3p, miR-145-3p, miR-4324, miR-338-5p, miR-19b-1-5p, miR-2284q, miR-6240, miR-486-3p, miR-377-5p, miR-330-3p, miR-92a-1-5p, miR-7-5p, miR-34b-5p, novel\_96, miR-491-5p, miR-25-5p, miR-1224-5p, miR-27a-3p, miR-377-5p, miR-1343-3p, miR-330-3p, miR-2285e, miR-2285g, miR-185-5p, miR-2427, miR-197-3p, miR-30b-3p, miR-1197-5p, miR-615-3p, miR-3578, miR-7b-5p, miR-744-5p, miR-27b-3p, miR-34a-5p, miR-885-3p, miR-30b-3p, miR-2285f, miR-3059-5p, miR-539-5p, miR-145a-3p, miR-449a, miR-219a-2-3p, miR-361-3p, miR-34c, miR-135a-5p, novel\_87, miR-2433, miR-551b-3p, miR-615, miR-4492, miR-486b-3p, miR-502b, miR-2285u, novel\_107, miR-296-3p, miR-6535, miR-27a-3p, miR-34c-5p, miR-34b, miR-378j, miR-2285ab, miR-2285c, miR-625-5p, miR-885-3p, miR-135b-5p, miR-3963, miR-2312

POLA2 ENSOARGO(polymera

CCNG1 ENSOARGO(cyclin G

C19orf81 ENSOARGO(chromoso

miR-2b, miR-378g, miR-3082-5p, miR-2483-3p, miR-3064-5p, miR-139-5p, miR-199b-5p, miR-423-5p, miR-2447, miR-541-3p, miR-452-5p, miR-3968, miR-490-5p, miR-374a-3p, miR-382-3p, miR-769-5p, miR-1298-3p, miR-455-3p, miR-216a-3p, miR-2459, miR-5010-3p, miR-101a-5p, miR-541, miR-323b, miR-758-3p, miR-8485, miR-758-3p, miR-491-3p, miR-1388-3p, miR-494-3p, miR-424-5p, miR-382-3p, let-7c-3p, miR-33a-5p, miR-3085-3p, miR-487b-5p, miR-199b-5p, miR-146b, miR-326, miR-323b-3p, miR-16b, miR-139-5p, miR-204-3p, miR-15b-5p, miR-216b-3p, miR-296-3p, miR-552-3p, let-7g-3p, miR-625-5p, novel\_99, miR-769-5p, miR-3184-5p, miR-590-3p, miR-539-5p, miR-3074-2-3p, miR-6516-3p, miR-487b-5p, miR-874-5p, miR-424-5p, miR-30e-3p, miR-30a-3p, miR-19b-1-5p, miR-320e, miR-664a-5p, miR-338-5p, miR-15a-5p, miR-532-3p, miR-616-3p, miR-30d-3p, miR-2904, miR-140-3p, miR-188-3p, miR-217-5p, miR-5703, miR-146a-5p, miR-2411, miR-183-5p, miR-369-3p, miR-760-3p, miR-3653-3p, miR-2484, miR-219b-5p, miR-92a-1-5p, miR-125b, miR-374c-3p, novel\_69, miR-670-3p, miR-6535, miR-450b-3p, miR-146b-5p, miR-135b-5p, miR-195a-5p, miR-2387, miR-216a-3p, miR-326-3p, miR-374c-5p, miR-199b-5p, miR-2284w, miR-135a-2-3p, miR-495-3p, miR-6119-3p, novel\_1, miR-147-5p, miR-15a, miR-16a, miR-33a-3p, novel\_87, miR-134-3p, miR-185-5p, miR-6238, miR-31-5p, miR-16b, miR-497-5p, miR-19b-2-5p, miR-223-3p, miR-1285, miR-1434-3p, miR-374b-3p, miR-432-3p, miR-124-5p, miR-452-5p, miR-1343-5p, miR-125a-5p, miR-146a, miR-374c-3p, miR-769, miR-199a-5p, miR-874-3p, miR-125a, miR-876-3p, miR-3074-1-3p, miR-485-5p, miR-3154, miR-323-3p, miR-374a-3p, miR-16-5p, miR-374b-3p, novel\_63, miR-34c-3p, miR-125b-5p, miR-135a-5p, miR-322-5p, miR-2411-5p, miR-2285ad, miR-300, miR-128-3p, miR-2427, miR-1343-5p, miR-330-5p, miR-199a-5p, miR-200a, miR-30a-3p, miR-3064-5p, miR-4286, miR-181a-2-

miR-326-3p, miR-323c, miR-758-5p, miR-2285x, miR-1193, miR-1839-3p, miR-6123, miR-92a-3p, miR-374c-3p, miR-323a-5p, miR-3120-3p, miR-655-5p, miR-9851-3p, miR-2319a, miR-19a-3p, miR-412-3p, miR-296-3p, miR-363-5p, miR-668-3p, miR-493-5p, miR-660, miR-378a-5p, miR-32, miR-296-3p, miR-134-3p, miR-26a-2-3p, miR-219a-1-3p, miR-16-1-3p, miR-450c-3p, miR-2113, miR-1285, miR-1843b-5p, miR-19b-2-5p, miR-708-3p, miR-28a-3p, miR-486b-3p, miR-592, miR-331-3p, miR-370-5p, miR-34c-3p, miR-25-3p, miR-769, miR-374c-3p, miR-3074-1-3p, miR-23b, miR-2285b, miR-2284a, miR-2284y, miR-92b-3p, miR-181a-2-3p, miR-92a-3p, miR-127-5p, miR-450a-2-3p, miR-2898, miR-28-3p, miR-3071-3p, miR-205-5p, miR-214-5p, miR-450a-1-3p, miR-6516-5p, miR-1271-5p, miR-505-5p, miR-431, miR-330-5p, miR-3578, miR-345-3p, miR-154a, miR-9-3p, miR-452-5p, miR-541-3p, miR-363-3p, miR-32-3p, miR-490-5p, miR-3968, miR-769-5p, miR-382-3p, miR-1185-2-3p, miR-3082-5p, miR-378g, miR-1983, miR-9-3p, novel\_94, miR-493-5p, miR-96-5p, miR-129b-5p, miR-23a-3p, miR-494-3p, miR-1839-3p, miR-382-3p, miR-182-5p, miR-2957, miR-323b-3p, miR-29b-1-5p, miR-431-5p, miR-326, miR-1185-3p, miR-421, miR-455-3p, miR-539-5p, miR-125b-2-3p, miR-323b, miR-541, miR-769-5p, miR-665-5p, miR-1271, miR-129-5p, miR-450b-3p, miR-655-3p, miR-19b-1-5p, novel\_25, miR-323-5p, miR-216b-5p, miR-27a-5p, miR-6516, miR-182-5p, miR-296-3p, miR-370-5p, miR-548o-3p, miR-32-3p, miR-660-5p, miR-32-5p, novel\_99, miR-655, miR-450a-1-3p, miR-299, miR-21a-3p, miR-2432, miR-486-3p, miR-376c-3p, miR-29b-1-5p, miR-421-5p, miR-345-3p, miR-216c-5p, miR-345-3p, miR-92a-1-5p, miR-216a-5p, miR-1247-5p, miR-23c, miR-23b-3p, miR-380-5p, miR-361-5p, miR-16-1-3p, miR-19b-3p, miR-5703, miR-2904, miR-2300b-3p, novel\_133

miR-423-5p, miR-361-3p, miR-2447, miR-7134-3p, miR-2285t, miR-4726-5p, miR-107-5p, miR-218-5p, miR-615, miR-2440, let-7d-5p, miR-4443, miR-3596, miR-4792, miR-877-3p, miR-1983, miR-361-3p, miR-140-5p, miR-3187-3p, miR-30c-1-3p, miR-1388-3p, let-7a-5p, miR-127-3p, let-7e, miR-214-3p, miR-103a-2-5p, miR-491-5p, miR-3955-3p, miR-431-5p, miR-421, miR-2459, miR-1298-3p, miR-1343-3p, miR-2300a-5p, miR-409b, miR-548w, miR-30b-3p, miR-484, miR-296-5p, let-7b-5p, miR-3184-5p, miR-6134, miR-6525, miR-346, miR-214, miR-665-5p, miR-433-5p, let-7b, miR-3074-5p, miR-708-5p, miR-874-5p, miR-4492, miR-664a, miR-324-3p, miR-665, let-7f, novel\_25, miR-204-3p, let-7i-5p, miR-6516, miR-193b-3p, miR-3065-3p, miR-552-3p, miR-221-5p, miR-140-5p, miR-30c-1-3p, miR-885-3p, miR-486-3p, miR-376a-5p, miR-377-5p, miR-2887, miR-221-5p, miR-34b-5p, let-7k, miR-21-3p, miR-98-5p, miR-185-3p, miR-122-3p, novel\_17, novel\_83, miR-532-3p, miR-328-3p, miR-505-3p, miR-18a-3p, miR-34a-5p, miR-378d, miR-1197-5p, miR-1193, miR-5703, miR-188-3p, novel\_133, miR-193b-5p, miR-2366, miR-2300b-3p, miR-1961, miR-449a, miR-2428, miR-193b-3p, miR-29c-3p, miR-22-5p, miR-29a, miR-34c, let-7i, miR-502-5p, miR-1247-3p, miR-133a-5p, miR-146b-3p, miR-29a-3p, miR-34b, miR-3074-5p, miR-9851-3p, miR-6395, miR-505-3p, let-7e-5p, miR-450b-3p, miR-1291, miR-412-3p, miR-18a-3p, miR-2387, miR-654-3p, miR-432-3p, miR-1343-5p, miR-106b-3p, miR-193a-3p, miR-483-3p, miR-378a-5p, miR-455-5p, novel\_51, miR-194-3p, let-7g-5p, miR-3431, miR-377-5p, miR-26b-3p, miR-133b-5p, miR-4508, miR-455-5p, miR-2284x, miR-29b, miR-138, miR-30b-3p, miR-1260b, miR-1285, miR-542-3p, miR-1434-3p, miR-1843b-5p, miR-1260b, miR-193a-5p, miR-1306-5p, miR-486b-3p, miR-28-5p, miR-138-5p, miR-331-3p, miR-29b-3p, miR-223-5p, miR-34c-5p, miR-2355-5p, miR-370-3p, miR-615-5p, miR-141-3p, miR-874-

ADRM1

ENSOARGO(adhesion

miR-20a-3p, miR-499b-5p, miR-2285u, miR-374b-5p, miR-3082-5p, miR-1185-2-3p, miR-144-5p, miR-199b-5p, miR-129b-5p, miR-668-5p, miR-493-5p, miR-3956-3p, novel\_60, miR-194b-5p, miR-2284j, miR-190b-5p, miR-9-5p, novel\_111, miR-382-3p, miR-2285n, novel\_82, miR-2285y, miR-450a-5p, miR-154-3p, miR-2285t, miR-105-1, miR-548w, miR-2320-3p, miR-1185-3p, miR-455-3p, miR-10b, miR-329-3p, miR-484, miR-125b-2-3p, miR-101a-5p, miR-362-3p, miR-1b-5p, miR-8485, miR-431-5p, novel\_103, miR-199a-3p, miR-362-3p, miR-199b-5p, miR-548o-3p, miR-532-5p, miR-154a-3p, miR-21-3p, miR-10a, miR-377-3p, novel\_25, miR-154b-3p, let-7g-3p, miR-224-5p, miR-10b-5p, miR-2285j, miR-19b-1-5p, miR-487b-5p, miR-190a-5p, miR-148b-3p, miR-200b, miR-199a-3p, miR-193b-5p, miR-362-3p, miR-2300b-3p, miR-140-3p, miR-33b-3p, miR-487a, miR-329a-5p, miR-216c-5p, miR-183-5p, miR-664b-3p, miR-143-3p, miR-2432, miR-ATAD1 ENSOARGO(ATPase f:618, miR-2285p, miR-210-5p, novel\_17, miR-324-3p, miR-760-3p, miR-1277-5p, miR-329-5p, miR-10a-5p, miR-7-1-3p, miR-3120-3p, miR-374c-3p, miR-670-3p, miR-6535, miR-148a-3p, miR-3591-3p, novel\_120, miR-495-3p, miR-24-3p, miR-199b-5p, miR-379-3p, miR-147-5p, miR-185-5p, miR-2113, miR-708-3p, miR-653, miR-19b-2-5p, miR-194-5p, miR-2284x, miR-26a-2-3p, miR-493-5p, miR-503-3p, let-7j, miR-377-3p, miR-224-5p, miR-194a, miR-105-5p, miR-190a, miR-483-3p, miR-466f-3p, miR-487a-3p, miR-2285aa, miR-3959-5p, miR-331-5p, miR-300-3p, miR-2284n, miR-199a-5p, miR-331-5p, miR-301, miR-329b, miR-329a, miR-23a-5p, miR-374b, miR-144-5p, miR-1197-3p, miR-135a-1-3p, miR-2284k, miR-331-5p, miR-592, miR-429-3p, miR-2285ad, miR-431, miR-483-3p, miR-9-5p, novel\_121, miR-545-5p, miR-23b-5p, miR-411-3p, miR-10a-5p, miR-200b-3p, miR-105-2, miR-148b-5p, miR-3956-5p, miR-450c-5p, miR-199a-5p, miR-200c, miR-200c-3p, miR-152-3p

miR-214, miR-665-5p, miR-3184-5p, miR-122-5p, novel\_44, miR-769-5p, miR-6525, miR-2285j, miR-216b-3p, miR-15b-5p, miR-376e-3p, miR-499b-3p, miR-377-3p, miR-433-3p, miR-30d-5p, miR-2285c, miR-1827, miR-186-5p, miR-345-5p, miR-376c-3p, miR-422a, miR-345-3p, miR-500a-5p, miR-2285p, miR-618, miR-3653-3p, miR-106a, miR-378a-3p, miR-2366, miR-378i, miR-361-5p, miR-218-1-3p, miR-133a-3p, miR-142-3p, miR-190b-5p, miR-2447, miR-1285-5p, miR-423-5p, novel\_111, miR-877-3p, miR-361-3p, novel\_82, miR-211-5p, miR-2319b, miR-203-3p, miR-144-5p, miR-2483-3p, miR-499a-3p, miR-378j, miR-409-5p, miR-140-5p, miR-335-3p, miR-376a-3p, miR-136-5p, miR-1388-3p, miR-2310, miR-378d, miR-106b-5p, miR-16b, miR-505, miR-29b-1-5p, miR-323b-3p, miR-431-5p, miR-199a-3p, miR-214-3p, miR-146b, miR-487b-5p, miR-330-3p, miR-548w, miR-1298-3p, miR-539-5p, miR-376b-3p, miR-147a, miR-323b, miR-1839-5p, miR-1388-5p, miR-144-5p, miR-193a-5p, miR-16-5p, novel\_42, miR-1197-3p, miR-1260b, miR-6740-5p, novel\_9, miR-1271, miR-2285aa, miR-874-3p, miR-376c-3p, miR-376c-5p, miR-93-5p, miR-30e-5p, miR-1248, miR-20b-5p, miR-345-5p, miR-3064-5p, miR-2285b, miR-29a-5p, miR-148b-5p, miR-3071-3p, miR-127-5p, miR-431, miR-6517, novel\_121, miR-758-5p, miR-322-5p, miR-1290, miR-3591-5p, miR-29c-3p, novel\_87, miR-28c, miR-4324, miR-421-5p, miR-29a, miR-3120-3p, miR-320c, miR-3065-5p, miR-376b-5p, miR-378f, miR-2319a, miR-146b-5p, miR-6240, miR-380-5p, let-7a-2-3p, miR-432-3p, miR-432-3p, miR-2411-3p, miR-365b-5p, miR-377-3p, miR-146a, miR-378a-5p, miR-103a-3p, miR-31-5p, miR-194-3p, miR-411-5p, miR-3431, miR-3535, miR-542-3p, miR-27b-3p, miR-497-5p, miR-16b, miR-425-5p, miR-4510, miR-539-5p, miR-378c, miR-6134, miR-338-3p, miR-29b-2-5p, miR-708-5p, miR-208b-5p, miR-424-5p, miR-6516-3p, miR-532-5p, miR-378a-3p, miR-204-3p, novel\_25, miR-6130, miR-323-5p, miR-21a-3p, miR-503-5p, miR-181b-1-3p, miR-345-5p, miR-503-5p, miR-326, novel\_19, miR-760-3p, miR-181b-2-3p, miR-134-3p, miR-503-5p, novel\_133, miR-330-5p, miR-3120-5p, miR-7862, miR-145a-3p, miR-6525, miR-3184-5p, miR-423-5p, miR-326-3p, miR-2433, miR-6529b, miR-665, miR-128-1-5p, miR-320b, miR-7977, miR-615-5p, miR-27a-5p, miR-378g, miR-677, miR-181b-3p, miR-2387, miR-345-5p, miR-345-5p, miR-877-3p



miR-639b, miR-6516-3p, miR-107, miR-18a-3p, miR-670-3p, miR-29a-3p, miR-2404, miR-323a-5p, miR-656-5p, miR-22-5p, let-7i, miR-33a-3p, miR-20a-5p, miR-6402, miR-24-3p, miR-1307-3p, miR-2285x, novel\_101, miR-1260b, miR-29b, miR-1285, miR-873a-5p, miR-103, miR-2355-3p, miR-20b, let-7g-5p, miR-187-3p, miR-17-5p, miR-106a-5p, miR-345-5p, miR-654-3p, miR-363-5p, miR-382, miR-671-5p, miR-485-5p, miR-1814c, let-7g-3p, miR-17-5p, miR-199a-5p, miR-769, miR-29b-3p, miR-93, miR-133a-3p, miR-6128, let-7a-2-3p, miR-105-2, let-7d, miR-30a-5p, miR-218-2-3p, miR-29d-3p, miR-214-5p, miR-6516-5p, miR-24-2-5p, miR-7641, miR-543-5p, miR-107, miR-200c-3p, miR-2898, let-7c-5p, miR-200c, miR-1260a, miR-376c-5p, miR-199a-5p, miR-376b-5p, miR-2478, miR-181a-2-3p, miR-4286, miR-2385-3p, miR-199b-5p, miR-361-3p, miR-454-5p, let-7d-5p, miR-7857-3p, miR-7977, miR-541-5p, miR-499b-5p, miR-3064-5p, miR-4726-5p, miR-769-5p, miR-30b-5p, miR-219a-2-3p, miR-8095, miR-219a-5p, miR-452-5p, novel\_60, miR-101a-5p, miR-450b-5p, miR-544a, miR-125b-2-3p, miR-412-3p, miR-484, miR-9788-3p, miR-105-1, miR-151a-3p, miR-2300a-5p, let-7e, miR-25-5p, miR-3955-3p, miR-3085-3p, miR-2957, miR-5126, miR-4532, miR-494-3p, miR-106a-5p, let-7a-5p, novel\_99, miR-30f, miR-133b-3p, miR-27b-5p, miR-155-5p, novel\_25, miR-22-3p, miR-204-3p, miR-193b-3p, miR-323-5p, miR-6516, miR-544-3p, miR-140-5p, miR-6516-3p, miR-155-5p, miR-450b-3p, let-7b-5p, miR-941, miR-5703, miR-124-3p, miR-2904, miR-2408, miR-1246, novel\_83, miR-151-5p, miR-505-3p, miR-3600, miR-299-3p, miR-21-3p, miR-106a, miR-216a-5p, miR-130a-5p, miR-125b-2-3p, miR-20a, let-7e-5p, miR-3141, miR-669, miR-299b-3p, miR-625-3p, miR-29a, novel\_87, miR-4324, miR-199b-5p, miR-374c-5p, miR-29c-3p, miR-193b-3p, miR-4508, miR-450c-3p, miR-22-3p, miR-2113, miR-194-3p, miR-411-5p, miR-3431, miR-103a-3p, miR-31-5p, miR-103a-3p, miR-378a-

miR-4429, miR-19b-3p, miR-140-3p, miR-1193, miR-5703, miR-1246, miR-2366, miR-328-3p, miR-616-3p, miR-2284h-5p, miR-15a-5p, miR-200b, miR-222-5p, miR-383-5p, miR-212-5p, miR-3600, miR-221-5p, miR-320d, miR-345-3p, miR-125b, miR-210-5p, miR-208b-3p, miR-486-3p, miR-2411, miR-130a-5p, miR-376c-3p, miR-181b-1-3p, miR-369-3p, miR-2285w, miR-183-5p, miR-216c-5p, miR-186-5p, miR-543-3p, miR-345-5p, let-7g-3p, miR-655, miR-500a-3p, miR-21a-3p, miR-15b-5p, miR-6130, miR-582-5p, miR-376e-3p, miR-532-5p, miR-3065-3p, miR-496-3p, miR-221-5p, miR-130b-5p, miR-500, miR-424-5p, miR-664a, miR-6516-3p, miR-17-3p, miR-655-3p, miR-3604, miR-29b-2-5p, miR-2285j, miR-15b-3p, miR-6134, miR-181c-5p, miR-142a-5p, miR-145a-3p, miR-3074-5p, miR-4510, miR-539-5p, miR-3120-5p, miR-101c, miR-101a-5p, miR-2426, miR-30b-3p, miR-2284r, miR-455-3p, miR-500-5p, miR-376b-3p, miR-147a, miR-496-5p, miR-222-5p, miR-27a-3p, miR-145b, miR-181b-2-3p, miR-1343-3p, miR-199b-3p, miR-409b, miR-3955-3p, miR-491-5p, miR-16b, miR-320b, miR-2310, miR-3187-3p, miR-382-3p, miR-424-5p, miR-101b-3p, novel\_94, miR-9-3p, miR-376a-3p, miR-409-5p, miR-376d, miR-27a-3p, miR-4443, miR-489, miR-2483-3p, miR-3596, miR-7977, miR-211-5p, miR-664b, miR-2285t, miR-628-3p, miR-3968, miR-382-3p, miR-362-5p, miR-181d-5p, miR-9-5p, miR-2285f, miR-212-3p, miR-3059-5p, let-7a-2-3p, miR-496, miR-200b-3p, miR-29d-3p, miR-134, miR-1290, miR-345-3p, novel\_121, miR-134-5p, miR-2411-5p, miR-322-5p, miR-9-5p, miR-302a-5p, miR-429-3p, novel\_96, miR-181b-5p, miR-200c-3p, miR-17-3p, miR-2898, miR-3071-3p, miR-6119-5p, miR-664-3p, miR-200c, miR-1260a, miR-376b-3p, miR-2285b, miR-490-3p, novel\_39, miR-3065-3p, miR-29b-2-5p, miR-2385-3p, miR-3529-3p, miR-485-5p, let-7g-3p, miR-345-5p, miR-767, miR-362-5p, miR-320a, miR-3154, miR-137-3p, miR-503-3p, miR-154b, miR-21-3p, miR-106a, miR-130b-3p, miR-106b-5p, miR-377-3p, miR-539-3p, miR-106a-5p, miR-142-3p, miR-149-5p, miR-487a-3p, miR-130a-3p, miR-485-3p, miR-106a, miR-454-3p, miR-335, miR-371a-5p, miR-576-3p, miR-301b-3p, miR-93, miR-323c, miR-335-5p, miR-20b-5p, novel\_99, miR-1827, miR-93-5p, miR-378b, miR-3596, miR-301a-3p, miR-377-3p, miR-3120-3p, novel\_68, miR-548o-3p

|       |                     |                                                                                                                                                                                                                                                                                                                                                                                                                                                                                                                                                                                                                                                                                                                                                                                                                                                                                                                                                                                                                                                                                                                                                                                                                                                                                                                                                                                                                                                                                                                                                                                                                                                                                                                                                                                                                                                                                                                                                                                                                                                                                                                                                                                                                                                                                                                                                                                                                                                                                                                                                                                                                                                                                                                                                                                                                                                                                                                                                                    |
|-------|---------------------|--------------------------------------------------------------------------------------------------------------------------------------------------------------------------------------------------------------------------------------------------------------------------------------------------------------------------------------------------------------------------------------------------------------------------------------------------------------------------------------------------------------------------------------------------------------------------------------------------------------------------------------------------------------------------------------------------------------------------------------------------------------------------------------------------------------------------------------------------------------------------------------------------------------------------------------------------------------------------------------------------------------------------------------------------------------------------------------------------------------------------------------------------------------------------------------------------------------------------------------------------------------------------------------------------------------------------------------------------------------------------------------------------------------------------------------------------------------------------------------------------------------------------------------------------------------------------------------------------------------------------------------------------------------------------------------------------------------------------------------------------------------------------------------------------------------------------------------------------------------------------------------------------------------------------------------------------------------------------------------------------------------------------------------------------------------------------------------------------------------------------------------------------------------------------------------------------------------------------------------------------------------------------------------------------------------------------------------------------------------------------------------------------------------------------------------------------------------------------------------------------------------------------------------------------------------------------------------------------------------------------------------------------------------------------------------------------------------------------------------------------------------------------------------------------------------------------------------------------------------------------------------------------------------------------------------------------------------------|
| PTEN  | ENSOARGO( phosphat: | <p>miR-30a-3p, miR-3529-3p, miR-543-5p, miR-21-3p, miR-107, miR-219-3p, miR-26a-5p, miR-618, miR-205-5p, miR-486-5p, miR-616-3p, miR-582-3p, miR-7859, miR-18b-5p, miR-30d-3p, miR-548e-3p, miR-378d, miR-10a-5p, miR-142-3p, miR-582-3p, miR-19b-3p, miR-1434-5p, miR-29d-3p, miR-323-3p, miR-10b-5p, miR-93, miR-425-5p, miR-214, miR-6128, miR-539-5p, miR-454-3p, miR-30a-3p, miR-219b-3p, miR-29b-3p, miR-410-5p, novel_63, miR-22-3p, miR-193b-3p, miR-10a, miR-301a-3p, miR-532-5p, miR-2285aa, miR-548o-3p, miR-20b-5p, miR-18a-5p, miR-10b-3p, miR-18a, miR-129b-3p, miR-93-5p, miR-744-3p, miR-382, miR-363-5p, miR-193a-3p, miR-214-3p, miR-2285o, miR-130b-3p, miR-323b-3p, miR-105-5p, miR-103, miR-130a-3p, miR-105-1, miR-103a-3p, miR-188-5p, miR-29b, miR-125b-2-3p, miR-22-3p, miR-323b, miR-10b, miR-542-3p, miR-219a-2-3p, miR-29c-3p, miR-193b-3p, miR-29a, miR-382-5p, miR-33a-3p, miR-133a-5p, miR-2440, miR-2285n, miR-29a-3p, miR-489, miR-10a-5p, miR-7-1-3p, miR-26b-5p, miR-335-3p, miR-19a-3p, miR-668-5p, miR-107, miR-3065-5p, miR-18b, miR-582, novel_51, miR-2331-5p, miR-124-5p, miR-193a-3p, miR-125a-5p, miR-668-3p, let-7a-2-3p, miR-6412, miR-2113, miR-1285, miR-873a-5p, miR-708-3p, miR-374b-3p, miR-219a-1-3p, miR-29b, miR-138, miR-30b-3p, miR-7862, miR-4508, miR-340-3p, miR-26b-3p, miR-339-5p, miR-3535, miR-6402, miR-142b, miR-576-3p, miR-4324, novel_1, miR-29a, miR-6123, miR-502b, miR-22-5p, miR-335-5p, novel_101, miR-29c-3p, miR-193b-3p, miR-199b-5p, miR-2284w, miR-326-3p, miR-18a-3p, miR-216a-3p, miR-2284e, miR-450b-3p, miR-1291, miR-378f, miR-2319a, novel_68, miR-29a-3p, miR-181b-3p, miR-144-3p, miR-677, miR-8117, miR-664-3p, miR-339a, miR-30f, miR-543-5p, novel_127, miR-4286, miR-495-5p, miR-3064-5p, miR-3956-5p, miR-490-3p, miR-1271-3p, miR-199a-5p, miR-1290, miR-330-5p, miR-218-2-3p, miR-29d-3p, let-7a-2-3p, miR-128-3p, miR-423-3p, miR-2285ad, miR-1224-5p, novel_79, miR-378h, miR-410-5p, miR-2433, novel_63, miR-29b-3p, miR-144, miR-125b-5p, miR-331-3p, miR-138-5p, miR-592, miR-193a-5p, miR-323-3p, miR-378c, let-7g-3p, miR-10b-3p, miR-190a-3p, miR-574-5p, miR-125a, miR-199a-5p, novel_103, miR-326, miR-3955-3p, miR-3085-3p, miR-214-3p, miR-199b-5p, miR-101b-3p, miR-382-3p, miR-33a-5p, miR-376b, miR-744-3p, let-7c-3p, miR-378d, miR-758-3p, miR-3187-3p, miR-143-5p, miR-541, miR-4791, miR-296-5p, miR-378b, miR-484, miR-2284r, miR-30b-3p, miR-758-3p, miR-1388-5p, miR-378c, miR-3120-5p, miR-548w, miR-181b-2-3p, miR-1298-3p, miR-2459, miR-9788-3p, novel_82, miR-218-5p, miR-371a-5p, miR-1973, miR-2285y, miR-335, miR-3958-3p, miR-4726-5p, miR-3968, miR-885-5p, miR-541-3p, miR-3059-5p, miR-2447, miR-6527, miR-877-3p, miR-9-3p, miR-199b-5p, miR-504, miR-147-3p, novel_94, miR-9-3p, miR-2319b, miR-452-3p, miR-3064-5p, miR-139-5p, miR-664b, miR-4792, miR-7977, miR-541-5p, miR-3082-5p, miR-378a, miR-3506, miR-92a-1-5p, miR-</p> |
| DPEP1 | ENSOARGO( dipeptid: | <p>5p, miR-2433, novel_63, miR-29b-3p, miR-144, miR-125b-5p, miR-331-3p, miR-138-5p, miR-592, miR-193a-5p, miR-323-3p, miR-378c, let-7g-3p, miR-10b-3p, miR-190a-3p, miR-574-5p, miR-125a, miR-199a-5p, novel_103, miR-326, miR-3955-3p, miR-3085-3p, miR-214-3p, miR-199b-5p, miR-101b-3p, miR-382-3p, miR-33a-5p, miR-376b, miR-744-3p, let-7c-3p, miR-378d, miR-758-3p, miR-3187-3p, miR-143-5p, miR-541, miR-4791, miR-296-5p, miR-378b, miR-484, miR-2284r, miR-30b-3p, miR-758-3p, miR-1388-5p, miR-378c, miR-3120-5p, miR-548w, miR-181b-2-3p, miR-1298-3p, miR-2459, miR-9788-3p, novel_82, miR-218-5p, miR-371a-5p, miR-1973, miR-2285y, miR-335, miR-3958-3p, miR-4726-5p, miR-3968, miR-885-5p, miR-541-3p, miR-3059-5p, miR-2447, miR-6527, miR-877-3p, miR-9-3p, miR-199b-5p, miR-504, miR-147-3p, novel_94, miR-9-3p, miR-2319b, miR-452-3p, miR-3064-5p, miR-139-5p, miR-664b, miR-4792, miR-7977, miR-541-5p, miR-3082-5p, miR-378a, miR-3506, miR-92a-1-5p, miR-</p>                                                                                                                                                                                                                                                                                                                                                                                                                                                                                                                                                                                                                                                                                                                                                                                                                                                                                                                                                                                                                                                                                                                                                                                                                                                                                                                                                                                                                                                                                                                                                                                                                                                                                                                                                                                                                                                                                                                                                                              |

RIPPLY3 ENSOARGO(ripply t:

miR-29d-3p, miR-128-3p, novel\_79, miR-6517, miR-129-1-3p, miR-6516-5p, miR-378h, miR-322-5p, miR-339a, miR-376b-3p, novel\_127, miR-30a-3p, miR-29a-5p, miR-3065-3p, miR-301, miR-424-3p, miR-345-5p, miR-3956, miR-376c-3p, miR-29b-3p, miR-2284k, novel\_9, miR-138-5p, miR-193a-5p, miR-16-5p, miR-1306-5p, miR-378c, miR-194-5p, miR-7b-5p, miR-2889, miR-27b-3p, miR-497-5p, miR-138, miR-2284ab, miR-29b, miR-16b, miR-339-5p, miR-544b, miR-3431, miR-185-5p, miR-194a, miR-7-5p, miR-466f-3p, miR-378a-5p, miR-382, miR-493-5p, miR-345-5p, miR-539-3p, miR-2284l, miR-654-3p, miR-376b-3p, miR-216a-3p, miR-18a-3p, miR-150-5p, miR-378f, miR-195a-5p, miR-655-5p, miR-320b, miR-29a-3p, miR-146b-3p, miR-382-5p, miR-16a, miR-142b, miR-502-5p, miR-15a, miR-147-5p, miR-22-5p, miR-29a, miR-128-1-5p, miR-29c-3p, miR-2285x, miR-2284w, miR-1434-5p, miR-378a-3p, miR-2408, miR-378i, miR-485-3p, miR-30d-3p, miR-3600, miR-18a-3p, miR-15a-5p, miR-487a-3p, miR-422a, novel\_17, miR-2284m, miR-345-3p, miR-216c-5p, miR-2424, miR-376c-3p, miR-129b-3p, miR-186-5p, miR-339b, miR-345-5p, let-7g-3p, miR-3065-3p, miR-378a-3p, miR-504-5p, miR-15b-5p, novel\_25, miR-6516, miR-544-3p, miR-376e-3p, miR-30a-3p, miR-4492, miR-424-5p, miR-665-5p, miR-129-2-3p, miR-378c, miR-338-3p, miR-6134, miR-301b-5p, miR-541, miR-378b, miR-1839-5p, miR-101c, miR-299a-5p, miR-544a, miR-378c, miR-1388-5p, miR-27a-3p, novel\_78, miR-1343-3p, miR-455-3p, miR-539-5p, miR-376b-3p, miR-16b, miR-424-5p, miR-1388-3p, miR-4532, miR-378d, novel\_94, miR-376a-3p, miR-493-5p, miR-335-3p, miR-504, miR-7977, miR-499b-5p, miR-452-3p, miR-20a-3p, miR-376d, miR-4443, miR-27a-3p, miR-2483-3p, miR-378e, miR-301a-5p, miR-2285n, miR-628-3p, miR-194b-5p, miR-2284j, miR-452-5p, miR-6527, miR-541-3p, miR-3956-3p, novel\_60, miR-154a

miR-543-5p, miR-181b-5p, miR-127-5p, miR-200c-3p, miR-2898, miR-30c-2-3p, miR-219-3p, miR-200c, miR-490-3p, miR-2284y, miR-2385-3p, miR-1, miR-30a-3p, miR-10a-5p, miR-200b-3p, miR-582-3p, miR-411-3p, miR-330-5p, miR-23b-5p, miR-1343-5p, miR-3578, miR-345-3p, miR-486-5p, novel\_121, miR-582-3p, miR-2284z, miR-378h, miR-9-5p, miR-429-3p, miR-6517, miR-299a-3p, miR-374b-3p, miR-135a-5p, miR-370-5p, miR-2284k, miR-378c, miR-365a-5p, miR-374a-3p, miR-323-3p, miR-6128, miR-2284v, miR-1306-5p, miR-3074-1-3p, miR-329a, miR-3154, miR-320a, miR-200a-5p, miR-30e-5p, miR-324-5p, miR-769, miR-2285aa, miR-487a-3p, miR-1343-5p, miR-124-5p, miR-2411-3p, miR-365b-5p, miR-224-5p, let-7j, miR-539-3p, miR-2284l, miR-2285r, miR-654-3p, miR-628-5p, miR-668-3p, miR-382, miR-493-5p, miR-130b-5p, miR-188-5p, miR-219a-1-3p, miR-2284ab, miR-3071-5p, miR-181a-5p, miR-1843b-5p, miR-544b, novel\_116, miR-3431, miR-185-5p, miR-2284d, miR-2285g, miR-665, miR-3955-5p, miR-31-5p, miR-147-5p, miR-625-3p, miR-656-5p, miR-206, miR-379-3p, miR-382-5p, miR-33a-3p, miR-208a-3p, miR-2428, miR-2284w, miR-326-3p, miR-1193, novel\_120, miR-135b-5p, miR-378f, miR-412-3p, miR-3591-3p, miR-2387, miR-2285ab, miR-181b-3p, miR-320c, miR-6535, miR-677, novel\_69, miR-299b-3p, miR-670-3p, miR-10a-5p, miR-655-5p, miR-320b, miR-378b, miR-329-5p, miR-216b-3p, miR-299-3p, miR-21-3p, miR-221-5p, miR-320d, miR-422a, miR-345-3p, miR-324-3p, miR-208b-3p, novel\_17, miR-2285p, miR-618, miR-2432, miR-181b-1-3p, miR-142a-3p, miR-487a, miR-329a-5p, miR-2284u, miR-133a-3p, miR-4429, miR-378a-3p, miR-5703, miR-2904, miR-362-3p, miR-2366, miR-2300b-3p, novel\_133, miR-378i, miR-199a-3p, miR-222-5p, miR-200b, miR-487a-3p, miR-485-3p, miR-30d-3p, miR-3600, miR-130b-5p, miR-208b-5p, miR-6516-3p, miR-320a, miR-30a-3p, miR-219b-3p, miR-30e-3p, miR-181c-

miR-215-5p, miR-1197-5p, miR-2904, miR-941, miR-361-5p, miR-378d, miR-664-5p, miR-18a-3p, miR-3960, miR-212-5p, miR-328-3p, novel\_83, miR-210-5p, miR-219b-5p, miR-324-3p, miR-760-3p, miR-99a-3p, miR-21-3p, miR-105-3p, miR-345-3p, miR-29b-1-5p, miR-486-3p, miR-2411, miR-18a-5p, miR-345-5p, let-7g-3p, miR-3065-3p, miR-139-5p, miR-192-5p, novel\_25, miR-29b-2-5p, miR-4492, miR-874-5p, miR-214, miR-769-5p, miR-338-3p, miR-3184-5p, miR-1298-5p, miR-143-5p, miR-296-5p, miR-2284r, miR-758-3p, miR-2300a-5p, miR-409b, novel\_78, miR-1185-3p, miR-455-3p, miR-5126, miR-1306-5p, miR-29b-1-5p, novel\_124, miR-3085-3p, miR-214-3p, miR-103a-2-5p, miR-1839-3p, miR-758-3p, miR-4532, miR-8485, miR-140-5p, miR-361-3p, miR-136-5p, miR-147-3p, miR-3064-5p, miR-139-5p, miR-378g, miR-7857-3p, miR-1185-2-3p, miR-218-5p, miR-107-5p, miR-769-5p, miR-335, miR-3968, miR-2284q, miR-212-3p, miR-3956-3p, novel\_60, miR-361-3p, miR-877-3p, miR-423-5p, miR-134, let-7a-2-3p, miR-6517, miR-18b-5p, miR-2411-5p, miR-134-5p, miR-1260a, miR-3071-3p, novel\_127, miR-181a-2-3p, miR-3064-5p, miR-29b-2-5p, miR-450b-5p, novel\_39, miR-3065-3p, miR-18a, miR-345-5p, novel\_91, let-7g-3p, miR-1248, miR-485-5p, miR-3957-5p, miR-215-5p, miR-615-5p, miR-2355-5p, miR-99a-3p, miR-769, miR-3957, miR-99b-3p, miR-2433, miR-134-5p, miR-486b-3p, miR-6128, miR-1260b, miR-365a-5p, miR-1260b, miR-7862, miR-744-5p, miR-133b-5p, miR-185-5p, miR-134-3p, miR-149-5p, novel\_51, miR-365b-5p, miR-124-5p, miR-378a-5p, let-7f-2-3p, miR-668-3p, miR-432-3p, miR-654-3p, miR-432-3p, miR-345-5p, let-7a-2-3p, miR-18b, miR-18a-3p, miR-1306, miR-1291, miR-6395, novel\_68, miR-411b-3p, miR-335-5p, miR-1839-3p

miR-3074-1-3p, miR-10b-3p, miR-320a, miR-3154, miR-2448-3p, miR-324-5p, miR-199a-5p, miR-154b-5p, miR-374c-3p, miR-365a-3p, miR-138-5p, miR-409-3p, miR-145-3p, miR-378c, miR-6128, miR-200b-3p, miR-411-3p, miR-345-3p, miR-134, miR-545-5p, miR-483-3p, miR-378h, miR-1271-5p, miR-107, miR-200c-3p, miR-181b-5p, miR-217, miR-200c, miR-3065-3p, miR-199a-5p, miR-490-3p, miR-380-5p, miR-29b-2-5p, miR-195a-5p, miR-6516-3p, miR-1291, miR-107, miR-2285ab, miR-2387, miR-2404, miR-670-3p, miR-378b, miR-203b-5p, miR-22-5p, miR-147-5p, miR-199c, miR-16a, miR-15a, miR-502-5p, miR-2428, miR-2285x, miR-495-3p, miR-138, miR-2284ab, miR-194-5p, miR-3071-5p, miR-374b-3p, miR-873a-5p, miR-653, miR-181a-5p, miR-1285, miR-544b, miR-103, miR-2284d, miR-185-5p, miR-26b-3p, miR-1343-5p, miR-125a-5p, miR-124-5p, miR-345-5p, miR-363-5p, novel\_99, miR-21a-3p, novel\_25, novel\_32, miR-544-3p, miR-6130, miR-139-5p, miR-3065-3p, miR-532-5p, miR-378a-3p, miR-208b-5p, miR-424-5p, miR-450b-3p, miR-6516-3p, miR-664a, miR-324-3p, miR-320e, miR-1271, miR-425-5p, miR-378c, miR-539-5p, miR-4510, miR-145a-3p, miR-4429, miR-5703, miR-1197-5p, miR-2300b-3p, novel\_83, miR-487a-3p, miR-148b-3p, miR-200b, miR-15a-5p, miR-485-3p, miR-548e-3p, miR-320d, miR-125b, miR-185-3p, miR-196a-3p, miR-2432, miR-361-3p, miR-199b-5p, miR-378e, miR-7857-3p, miR-489, miR-3082-5p, miR-2285t, miR-2284q, miR-4726-5p, miR-335, miR-194b-5p, miR-452-5p, miR-181d-5p, miR-212-3p, miR-2284aa, miR-378c, miR-544a, miR-101a-5p, miR-6529a, miR-378b, miR-484, miR-4791, miR-216a-3p, miR-9788-3p, miR-320b, novel\_115, miR-193a, miR-3187-3p, miR-491-3p, miR-33a-5p, miR-424-5p, miR-345-5p, miR-329b, miR-200a-5p, miR-424-3p, miR-2355-5p, miR-125a, miR-3068-3p, miR-134-5p, miR-6740-5p, miR-125b-5p, miR-2284k, miR-1197-3p, miR-16-5p, miR-28a-3p, miR-2284v, miR-1343-5p, miR-758-3p, miR-199c, miR-668-5p, miR-499a-5p, miR-199b-3p, miR-758-3p, miR-223-5p, miR-134-3p, miR-378g, miR-380-5p, novel\_39, miR-2285b, miR-380-5p, miR-181b-5p, miR-125a-5p, novel\_127, miR-376b-3p, miR-125b, miR-383-5p, miR-222-5p, miR-376b-3p, miR-450a-1-3p, miR-2285e, miR-18a-3p, miR-2285ad, miR-380-5p, miR-3600, miR-493-3p, miR-380-3p, miR-181a-5p, miR-431-3p, miR-450c-3p, miR-125b-2-3p, miR-181c-5p, miR-758-5p, miR-181d-5p, miR-450b-3p, miR-374a-3p, novel\_82, miR-15b-3p, miR-4324, miR-6402, miR-2285y, miR-125b-5p, miR-331-5p, miR-2483-3p, novel\_25, miR-877-5p, miR-376d, miR-452-3p, miR-216b-3p, miR-125a, miR-376a-3p, miR-2448-3p, miR-301, miR-450a-1-3p, miR-376b-3p, miR-18a-3p

SHISA3 ENSOARGO(shisa fa) miR-137-3p

HAUS6 ENSOARGO(HAUS aug) miR-137-3p

ENPPI1 ENSOARGO(ectonucl) miR-137-3p

PIGP ENSOARGO(phosphat) miR-137-3p

miR-3969, miR-34c-3p, miR-138-5p, miR-6128, miR-365a-5p, miR-93, miR-323-3p, miR-3154, miR-17-5p, miR-488-3p, miR-381-3p, miR-7144-5p, miR-671-5p, miR-10b-3p, miR-215-5p, miR-141-3p, miR-199a-5p, miR-769, miR-30c-2-3p, miR-339a, miR-217, miR-376b-3p, miR-1260a, miR-543-5p, miR-17-3p, miR-29b-2-5p, miR-4286, miR-1957a, miR-199a-5p, miR-3065-3p, miR-490-3p, miR-28b, miR-128-3p, miR-10a-5p, miR-300, miR-7641, miR-24-2-5p, miR-16a, miR-33a-3p, miR-15a, miR-6402, miR-20a-5p, miR-6529b, miR-22-5p, miR-203b-5p, novel\_1, novel\_101, miR-495-3p, miR-17-3p, novel\_120, miR-326-3p, miR-2428, miR-371b-3p, miR-376b-3p, miR-21c, miR-18a-3p, miR-2285ab, miR-2387, miR-9851-3p, miR-6395, miR-6516-3p, miR-195a-5p, miR-1291, miR-19a-3p, miR-10a-5p, miR-7-1-3p, miR-363, miR-323a-5p, miR-146b-3p, miR-670-3p, miR-17-5p, miR-106a-5p, miR-455-5p, miR-345-5p, miR-654-3p, miR-145a-5p, miR-873a-5p, miR-455-5p, miR-30b-3p, miR-138, miR-21-5p, miR-1260b, miR-219a-1-3p, miR-26b-3p, miR-133b-5p, miR-544b, miR-20b, miR-185-5p, miR-29b-2-5p, miR-424-5p, miR-17-3p, miR-664a, miR-145a-3p, miR-338-3p, miR-6134, miR-10b-5p, miR-21a-3p, let-7f-1-3p, miR-3065-3p, miR-182-5p, novel\_25, miR-22-3p, miR-192-5p, miR-544-3p, miR-323-5p, miR-196a-3p, miR-21-3p, miR-106a, miR-760-3p, miR-20a, miR-183-5p, miR-216c-5p, miR-2432, miR-140-3p, miR-1197-5p, miR-1193, miR-215-5p, miR-2408, let-7a-3p, miR-19b-3p, miR-3600, miR-1b-3p, miR-222-5p, miR-15a-5p, miR-769-5p, miR-371a-5p, miR-7134-3p, miR-2285t, miR-2285f, miR-452-5p, miR-3059-5p, novel\_60, miR-154a, miR-199b-5p, novel\_94, miR-541-5p, miR-499b-5p, miR-7977, miR-3064-5p, miR-20a-3p, miR-10b, miR-27a-3p, miR-376d, miR-3082-5p, miR-326, miR-3085-3p, let-7c-3p, miR-652-5p, miR-382-3p, miR-106a-5p, miR-424-5p, miR-758-3p, miR-30c-1-3p, miR-30b-3p, miR-143-5p, miR-10b, miR-2284aa, miR-3120-



miR-155-5p, miR-30c, miR-10a-5p, miR-1343-5p, miR-30a-5p, miR-134, miR-582-3p, miR-134-5p, miR-450a-1-3p, miR-214-5p, miR-302a-5p, miR-758-5p, miR-1271-5p, miR-6516-5p, miR-7641, miR-222, miR-92a-3p, novel\_127, miR-152-3p, miR-200a-3p, miR-17-3p, miR-450a-2-3p, miR-28-3p, miR-1260a, miR-2285b, miR-3956-5p, miR-490-3p, miR-92b-3p, miR-28b, miR-3064-5p, miR-29b-2-5p, miR-4286, miR-23a-5p, miR-671-5p, miR-1814c, miR-345-5p, miR-329b, miR-200a-5p, miR-320a, miR-3154, miR-223-5p, miR-25-3p, miR-769, miR-542-5p, miR-125a, miR-141-3p, miR-28-5p, miR-134-5p, miR-125b-5p, miR-3969, novel\_63, miR-1260b, miR-3607-3p, miR-6128, miR-193a-5p, miR-103b, miR-28a-3p, miR-455-5p, miR-2284x, miR-380-3p, miR-1260b, miR-450c-3p, miR-708-3p, miR-223-3p, miR-542-3p, miR-544b, miR-134-3p, miR-3431, miR-665, miR-1343-5p, miR-125a-5p, miR-193a-3p, miR-124-5p, miR-32, miR-455-5p, let-7j, miR-345-5p, miR-432-3p, miR-2284l, miR-2483-5p, miR-130b-5p, miR-6395, miR-150-5p, miR-18a-3p, miR-148a-3p, miR-6535, miR-320c, miR-669, miR-2404, novel\_69, miR-670-3p, miR-320b, miR-10a-5p, miR-329-5p, miR-92a-3p, novel\_1, novel\_87, miR-382-5p, miR-502-5p, miR-28c, miR-6402, novel\_27, miR-2428, miR-323c, miR-193b-3p, miR-17-3p, novel\_101, miR-2285x, miR-335-5p, miR-378d, miR-4429, miR-1197-5p, miR-1193, miR-1434-5p, miR-5703, miR-30c-5p, miR-532-3p, miR-328-3p, miR-222-5p, miR-148b-3p, miR-18a-3p, miR-21-3p, miR-320d, miR-760-3p, miR-466i-5p, miR-500a-5p, miR-216a-5p, miR-185-3p, miR-125b, miR-30b, miR-196a-3p, miR-210-5p, miR-143-3p, miR-142a-3p, miR-329a-5p, miR-625-5p, miR-1827, novel\_99, miR-30f, miR-345-5p, miR-21a-3p, miR-204-3p, miR-877-5p, miR-155-5p, miR-10a, miR-6516, miR-499b-3p, miR-193b-3p, miR-6130, miR-182-5p, miR-32-5p, miR-504-5p, miR-708-5p, miR-130b-5p, miR-155-5p, miR-664a, miR-17-3p, miR-324-3p, miR-338-5p, miR-320a, miR-29b-2-5p, miR-2284x, miR-1343-5p, novel\_83, miR-542-3p, miR-210-5p, miR-1343-5p

DAPP1 ENSOARGO( dual ada

NPHP1 ENSOARGO( nephrono

miR-199b-5p, miR-33b-5p, miR-62b-3p, miR-379-3p, novel\_87, miR-576-3p, miR-28c, miR-181b-3p, miR-677, miR-6535, miR-669, miR-320c, miR-374c-3p, miR-329-5p, miR-3074-5p, miR-216b-3p, let-7e-5p, miR-378f, miR-3065-5p, miR-216a-3p, miR-1306, miR-148a-3p, miR-432-3p, miR-432-3p, miR-628-5p, miR-668-3p, miR-6240, novel\_51, miR-2411-3p, miR-365b-5p, miR-105-5p, miR-134-3p, miR-412-5p, miR-103a-3p, miR-31-5p, miR-27b-3p, miR-497-5p, miR-4508, miR-16b, miR-223-3p, miR-1843b-5p, miR-19b-2-5p, miR-16-5p, miR-193a-5p, miR-134-5p, novel\_9, miR-6740-5p, miR-2433, miR-3959-5p, miR-2355-5p, miR-1248, miR-345-5p, miR-876-3p, miR-301, miR-2285b, let-7g, novel\_39, miR-3064-5p, miR-152-3p, miR-127-5p, let-7f-5p, miR-219-3p, miR-205-5p, miR-134-5p, miR-758-5p, miR-505-5p, miR-9-5p, miR-322-5p, miR-412, miR-429-3p, miR-6517, miR-885-3p, miR-1343-5p, miR-1290, miR-423-5p, novel\_111, miR-361-3p, miR-877-3p, miR-9-5p, let-7i-3p, miR-2447, miR-3968, miR-218-5p, novel\_82, miR-25, miR-378g, miR-499a-3p, miR-211-5p, miR-335-3p, miR-504, miR-378j, miR-2310, miR-378d, miR-676-3p, miR-1388-3p, miR-124a, miR-199b-5p, miR-487b-5p, miR-16b, miR-323b-3p, miR-505, miR-199a-3p, miR-2459, miR-455-3p, miR-539-5p, miR-1298-3p, miR-181b-2-3p, miR-145b, miR-1343-3p, novel\_78, miR-330-3p, miR-548w, miR-101c, miR-1388-5p, miR-323b, miR-2284r, miR-181c-5p, miR-3184-5p, miR-346, miR-224-5p, miR-769-5p, miR-6525, miR-665-5p, miR-3074-5p, let-7b, miR-433-5p, miR-874-5p, miR-1468-5p, miR-4492, miR-30a-3p, miR-219b-3p, miR-30e-3p, miR-2285j, let-7f, let-7i-5p, miR-15b-5p, miR-216b-5p, miR-499b-3p, miR-216b-3p, miR-548o-3p, miR-504-5p, miR-186-5p, miR-625-5p, miR-885-3p, miR-543-3p, miR-345-5p, miR-411, miR-129b-3p, miR-181b-1-3p, miR-664b-3p, miR-2285i, miR-345-3p, miR-195a-3p, let-7k, miR-98-5p, miR-202-5p, miR-92a-1-5p, miR-122a, miR-345-3p, miR-500a-

miR-1002, miR-802-3p, miR-1210, miR-811-3p, miR-812-3p, miR-214-3p, miR-25-5p, miR-491-5p, miR-3085-3p, miR-5126, miR-326, miR-431-5p, miR-147a, miR-181b-2-3p, novel\_4, miR-2300a-5p, miR-1343-3p, miR-3120-5p, miR-1839-5p, miR-1388-5p, miR-30b-3p, miR-412-3p, miR-7857, miR-541, miR-10b, miR-301b-5p, miR-2284r, miR-296-5p, miR-484, miR-423-5p, miR-361-3p, miR-181d-5p, miR-541-3p, miR-3956-3p, miR-2447, novel\_60, miR-154-3p, miR-2285t, miR-4726-5p, miR-301a-5p, miR-1973, miR-769-5p, miR-2440, miR-4443, miR-378g, miR-7977, miR-3064-5p, miR-877-3p, miR-504, miR-96-5p, miR-361-3p, miR-486-3p, miR-377-5p, miR-181b-1-3p, miR-125b-2-3p, miR-345-3p, miR-487a, miR-183-5p, miR-299-3p, miR-21-3p, miR-221-5p, miR-34b-5p, miR-30b-3p, miR-466i-5p, miR-760-3p, miR-125b, miR-92a-1-5p, miR-185-3p, miR-324-3p, miR-3601, miR-542-5p, miR-328-3p, miR-1247-5p, miR-34a-5p, miR-378d, miR-184-3p, miR-140-3p, miR-5703, miR-1193, miR-124-3p, miR-2904, miR-2300b-3p, miR-2408, miR-6134, miR-338-3p, miR-181c-5p, miR-3184-5p, miR-346, miR-769-5p, miR-10b-5p, miR-214, miR-2330-3p, miR-665-5p, miR-425-5p, miR-1271, miR-4510, miR-145a-3p, miR-500, miR-874-5p, miR-4492, miR-664a, novel\_74, miR-665, miR-22-3p, miR-204-3p, miR-6130, miR-323-5p, miR-2284s, miR-10a, miR-296-3p, miR-221-5p, miR-504-5p, miR-2331-3p, miR-1827, miR-885-3p, miR-154b-3p, miR-339b, miR-500a-3p, miR-363-5p, miR-125a-5p, miR-1343-5p, miR-483-3p, miR-3141, miR-365b-5p, miR-7-5p, miR-103, miR-149-5p, miR-194-3p, miR-134-3p, miR-377-5p, miR-26b-3p, miR-339-5p, miR-103a-3p, miR-187-3p, miR-7862, miR-2889, miR-1260b, miR-138, miR-30b-3p, miR-22-3p, miR-181a-5p, miR-7b-5p, miR-449a, miR-326-3p, miR-24-3p, miR-1307-3p, miR-542-5p, miR-656-5p, miR-128-1-5p, miR-382-5p, miR-425-5p, miR-34c, miR-6529b, miR-181b-3p, miR-677, miR-6535, miR-34b, novel\_69, miR-299b-3p, miR-

RPUSD1

ENSOARGO(CRNA pseu

|       |                    |                                                                                                                                                                                                                                                                                                                                                                                                                                                                                                                                                                                                                                                                                                                                                                                                                                                                                                                                                                                                                                                                                                                                                                                                                                                                                                                                                                                                                                |
|-------|--------------------|--------------------------------------------------------------------------------------------------------------------------------------------------------------------------------------------------------------------------------------------------------------------------------------------------------------------------------------------------------------------------------------------------------------------------------------------------------------------------------------------------------------------------------------------------------------------------------------------------------------------------------------------------------------------------------------------------------------------------------------------------------------------------------------------------------------------------------------------------------------------------------------------------------------------------------------------------------------------------------------------------------------------------------------------------------------------------------------------------------------------------------------------------------------------------------------------------------------------------------------------------------------------------------------------------------------------------------------------------------------------------------------------------------------------------------|
| SYDE2 | ENSOARGO(synapse)  | miR-655-5p, miR-7-1-3p, miR-20a-3p, miR-329-5p, miR-144-3p, miR-499a-3p, miR-381-3p, miR-148a-3p, miR-221, miR-7975, miR-544-5p, miR-195a-5p, miR-9-3p, miR-505-3p, miR-96-5p, miR-107, miR-452-5p, miR-2284j, miR-423-5p, miR-154a, miR-3959-3p, miR-16a, miR-15a, miR-208a-3p, miR-6402, miR-3964, miR-206, miR-31-5p, novel_4, miR-103a-3p, miR-221-3p, miR-103, miR-153, miR-2284d, miR-323b, miR-1a-3p, miR-497-5p, miR-2284ab, miR-16b, miR-450b-5p, miR-219a-1-3p, miR-33a-5p, miR-494-3p, miR-424-5p, miR-432-3p, miR-654-3p, miR-432-3p, miR-323b-3p, miR-182-5p, miR-16b, miR-224-5p, miR-153-3p, miR-141-3p, miR-3956, miR-182-5p, miR-221-5p, miR-545-3p, miR-2284n, miR-15b-5p, miR-331-5p, miR-499b-3p, miR-27a-5p, miR-6516, miR-487b-5p, miR-21a-3p, miR-381-3p, novel_48, miR-7144-5p, miR-190a-3p, miR-1248, miR-10b-3p, miR-329b, miR-1271, miR-16-5p, miR-3074-2-3p, miR-590-3p, miR-3184-5p, miR-224-5p, miR-206-3p, miR-144, miR-665, miR-2284k, miR-222-3p, miR-494-5p, miR-208b-5p, miR-4492, miR-424-5p, novel_74, miR-1b-3p, miR-505-3p, miR-222, novel_83, miR-322-5p, miR-210-3p, miR-15a-5p, miR-340-5p, miR-148b-3p, miR-758-5p, miR-6516-5p, miR-1271-5p, miR-1193, miR-300, miR-142-3p, miR-1, miR-345-3p, miR-329a-5p, miR-3529-3p, miR-200a, miR-29a-5p, miR-125b-2-3p, miR-500a-5p, miR-208b-3p, miR-2285p, miR-221-5p, miR-107, miR-1277-5p, miR-21-3p, miR-200a-3p, miR-152-3p, miR-2284m |
| TTC3  | ENSOARGO(tetratri) | miR-301b-3p, miR-22-3p, miR-3082-5p, miR-301a-3p, miR-665-5p, miR-214, miR-130a-3p, miR-545-3p, miR-214-3p, miR-454-3p, miR-130b-3p, miR-22-3p                                                                                                                                                                                                                                                                                                                                                                                                                                                                                                                                                                                                                                                                                                                                                                                                                                                                                                                                                                                                                                                                                                                                                                                                                                                                                 |

miR-668-3p, miR-6240, miR-345-5p, miR-296-3p, miR-654-3p, miR-330-3p, miR-105-5p, miR-296-3p, miR-224-5p, miR-7-5p, miR-660, miR-378a-5p, miR-196b-5p, miR-26b-3p, miR-339-5p, miR-31-5p, miR-411-5p, miR-3431, miR-134-3p, miR-3071-5p, miR-450c-3p, miR-7b-5p, miR-223-3p, miR-181a-5p, miR-138, miR-495-3p, miR-17-3p, miR-2428, novel\_27, miR-211, miR-3074-5p, miR-181b-3p, miR-677, miR-3065-5p, miR-18a-3p, miR-2285ab, miR-135b-5p, miR-6395, miR-376a-2-5p, miR-450b-3p, miR-410-5p, miR-181a-2-3p, miR-30a-3p, miR-450c-5p, miR-490-3p, miR-192-3p, miR-29a-5p, miR-339a, miR-3071-3p, miR-2285af, miR-205-5p, miR-200a-3p, miR-543-5p, novel\_127, miR-181b-5p, miR-17-3p, miR-450a-2-3p, miR-376a-5p, miR-7641, novel\_79, miR-6517, miR-2285ad, novel\_121, miR-450a-1-3p, miR-1271-5p, miR-24-2-5p, miR-302a-5p, miR-1290, miR-3591-5p, miR-196a-5p, miR-105-2, miR-885-3p, miR-193a-5p, miR-145-3p, miR-500b-5p, miR-135a-5p, miR-204-5p, miR-28-5p, novel\_9, miR-138-5p, miR-141-3p, miR-2355-5p, miR-874-3p, miR-3959-5p, miR-365a-3p, miR-300-3p, miR-3154, miR-362-5p, miR-1248, miR-671-5p, miR-7144-5p, miR-329b, miR-345-5p, miR-10b-3p, miR-382-3p, miR-491-3p, miR-2957, miR-181b-2-3p, miR-105-1, novel\_78, miR-330-3p, miR-1343-3p, miR-151a-3p, miR-2300a-5p, miR-148b-5p, miR-500-5p, miR-142-5p, miR-3962, miR-6529a, miR-3120-5p, miR-16-2-3p, miR-21b, miR-2426, miR-1388-5p, miR-181d-5p, miR-2285f, miR-8095, miR-362-5p, miR-877-3p, miR-2285y, miR-371a-5p, miR-2285n, miR-382-3p, miR-2284q, miR-7134-3p, miR-450a-5p, miR-628-3p, miR-4726-5p, miR-7977, miR-211-5p, miR-541-5p, miR-10b, miR-3596, miR-7857-3p, miR-378g, miR-129b-5p, miR-378j, miR-361-3p, miR-544-5p, miR-136-5p, miR-147-3p, miR-96-5p, miR-130a-5p, miR-181b-1-3p, miR-664b-3p, miR-216a-5p, miR-219b-5p, miR-500a-5p, miR-221-5p, miR-30d-3p, miR-3600, miR-18a-3p, miR-328-3p, miR-1107-5p, miR-1246, miR-378d, miR-148a-5p, miR-412, miR-222, miR-2300a-5p, miR-221-3p, miR-2284h-5p, miR-2285e, miR-2355-3p, miR-2285g, miR-487a-3p, miR-412-3p, miR-126-3p, miR-484, miR-2408, miR-181a-5p, miR-2366, miR-218-1-3p, miR-6239, miR-378d, miR-582-3p, miR-1388-3p, miR-2285w, miR-382-3p, miR-539-3p, miR-125a-3p, novel\_103, miR-452-5p, miR-103a-2-5p, miR-181b-5p, miR-655-5p, miR-320b, miR-204-3p, miR-6535, miR-132-5p, miR-378b, miR-221, miR-2285c, miR-625-5p, miR-671-5p, miR-10b-3p, miR-2447, miR-3184-3p, miR-181c-5p, novel\_111, miR-24-3p, miR-6740-5p, novel\_87, miR-107-5p, miR-222-3p, novel\_82, miR-2440, miR-5100, miR-7134-3p

CLEC5A ENSOARGO(C-type 1

MOXD1 ENSOARGO(C monooxyg

miR-296-3p, miR-377-3p, miR-224-5p, miR-503-5p, miR-2411-3p, novel\_51, miR-105-5p, miR-124-5p, miR-193a-3p, miR-452-5p, let-7f-2-3p, let-7f-2-3p, miR-668-3p, miR-432-3p, miR-296-3p, let-7j, miR-181a-5p, miR-19b-2-5p, novel\_23, miR-22-3p, miR-16b, miR-497-5p, miR-133b-5p, miR-503-5p, miR-185-5p, miR-194-3p, miR-149-5p, miR-28c, miR-576-3p, miR-15a, miR-4324, novel\_87, miR-16a, miR-485-3p, novel\_1, miR-206, miR-342-3p, miR-495-3p, miR-17-3p, miR-1193, miR-193b-3p, miR-2284w, miR-326-3p, miR-3065-5p, miR-18a-3p, miR-150-5p, miR-1291, miR-6395, miR-195a-5p, miR-135b-5p, miR-2319a, miR-329-5p, miR-10a-5p, miR-3120-3p, miR-7-1-3p, miR-26b-5p, miR-299b-3p, miR-320c, miR-6119-5p, miR-217, miR-181b-5p, miR-17-3p, miR-543-5p, novel\_127, novel\_96, miR-3529-3p, miR-181a-2-3p, miR-450b-5p, miR-28b, miR-490-3p, miR-2285b, miR-134, miR-3578, miR-345-3p, miR-23b-5p, miR-330-5p, miR-10a-5p, miR-105-3p, miR-299a-3p, miR-2285ad, miR-322-5p, miR-302a-5p, miR-129-1-3p, miR-134-5p, miR-370-5p, miR-135a-5p, miR-134-5p, miR-592, novel\_42, miR-16-5p, miR-193a-5p, miR-3154, miR-320a, miR-329b, miR-2318, miR-1248, miR-1271, miR-542-5p, miR-370-3p, miR-300-3p, miR-326, miR-320b, miR-342, miR-16b, miR-2957, miR-491-5p, miR-103a-2-5p, miR-382-3p, miR-2330-5p, miR-424-5p, miR-574-3p, miR-1388-3p, miR-10b, miR-301b-5p, miR-484, miR-2426, miR-1388-5p, miR-105-1, miR-151a-3p, miR-142-5p, miR-1185-3p, miR-2459, miR-148b-5p, miR-216a-3p, miR-2440, miR-301a-5p, miR-107-5p, miR-2285y, miR-3968, miR-2447, miR-3059-5p, miR-181d-5p, novel\_111, miR-877-3p, miR-378j, miR-9-3p, novel\_94, miR-493-5p, miR-2319b, miR-4792, miR-2483-3p, miR-3596, miR-25, miR-1185-2-3p, miR-203-3p, miR-26a-5p, novel\_17, miR-345-3p, miR-324-3p, miR-500a-5p, miR-320d, miR-299-3p, miR-503-5p, miR-329a-5p, miR-345-3p, miR-2424, miR-1197-5p, miR-217-5p, miR-1193, miR-1199, miR-496, miR-2284u, miR-378d, miR-411-3p, miR-33b-3p, miR-4429, miR-1224-5p, miR-505-3p, miR-2284h-5p, miR-340-5p, miR-543-5p, miR-200a-3p, miR-345-3p, miR-2285w, miR-2284y, miR-200a, miR-143-3p, miR-1271-3p, miR-380-3p, miR-137-3p, miR-362-5p, miR-411, miR-320a, miR-543-3p, miR-582-5p, miR-186-5p, miR-671-5p, miR-10b-3p, miR-370-3p, miR-141-3p, miR-140-5p, miR-496-3p, miR-582-5p, miR-499b-3p, miR-300-3p, miR-193b-3p, miR-3604, novel\_63, miR-2284k, miR-410-3p, miR-3074-5p, miR-2284v, miR-338-3p, miR-500b-5p, miR-346, miR-1197-3p, miR-194-5p, miR-653, miR-873a-5p, miR-223-3p, miR-2284x, miR-380-3p, miR-500-5p, miR-6238, miR-421, miR-2355-3p, miR-2284d, miR-505, miR-194a, miR-320b, miR-342, miR-193a-3p, miR-668-3p, miR-628-5p, miR-129b-5p, miR-335-3p, miR-505-3p, miR-7977, miR-2284g, miR-216b-3p, miR-3074-5p, miR-2404, miR-499a-3p, miR-4324, miR-628-3p, miR-379-3p, miR-193b-3p, miR-2284j, miR-194b-5p, miR-342-3p, miR-362-5p, miR-24-3p

miR-136-5p, miR-376a-3p, miR-493-5p, miR-1983, miR-221, miR-378g, miR-2483-3p, miR-27a-3p, miR-376d, miR-664b, miR-20a-3p, miR-211-5p, miR-361-3p, miR-3059-5p, miR-2284j, miR-1388-5p, miR-101a-5p, miR-544a, miR-2426, miR-2284aa, miR-2284r, miR-323b, miR-376b-3p, miR-539-5p, miR-221-3p, miR-148b-5p, novel\_4, miR-5010-3p, miR-145b, miR-27a-3p, miR-3955-3p, miR-1468, miR-320b, miR-29b-1-5p, miR-323b-3p, miR-8485, miR-382-3p, miR-494-3p, miR-2330-5p, miR-23a-3p, miR-376b, miR-33a-5p, let-7g-3p, miR-133b-3p, miR-655, miR-377-3p, miR-544-3p, miR-376e-3p, miR-216b-5p, novel\_32, miR-545-3p, miR-370-5p, miR-552-3p, miR-664a, miR-1468-5p, miR-487a-5p, miR-669a-3p, miR-2285j, miR-222-3p, miR-30e-3p, miR-30a-3p, miR-338-5p, miR-655-3p, miR-3604, miR-181c-5p, miR-3074-5p, miR-425-5p, miR-4429, miR-133a-3p, miR-664-5p, miR-34a-5p, miR-148a-5p, miR-193b-5p, miR-2408, miR-1193, miR-5703, miR-140-3p, miR-188-3p, miR-23b-3p, miR-7859, miR-23c, miR-2284h-5p, miR-548e-3p, miR-1b-3p, miR-2284m, miR-320d, miR-30b-3p, miR-34b-5p, miR-299-3p, miR-210-5p, miR-2285p, miR-500a-5p, miR-29b-1-5p, miR-664b-3p, miR-376c-3p, miR-143-3p, miR-380-3p, miR-2285w, miR-2887, miR-412-3p, miR-2319a, miR-3970, miR-21c, miR-376b-3p, miR-299b-3p, miR-34b, miR-320c, miR-3074-5p, miR-3120-3p, miR-203b-5p, miR-22-5p, miR-147-5p, miR-576-3p, miR-34c, miR-211, miR-3959-3p, miR-449a, miR-2284w, miR-219b-3p, miR-495-3p, miR-2285x, miR-1193, miR-380-3p, miR-21-5p, miR-2284ab, miR-27b-3p, miR-432, miR-653, miR-1434-3p, miR-145a-5p, miR-3071-5p, miR-2284d, miR-432-5p, miR-412-5p, miR-134-3p, miR-185-5p, miR-194-3p, miR-2355-3p, miR-544b, miR-466f-3p, miR-377-3p, miR-365b-5p, miR-105-5p, miR-432-3p, miR-2284l, let-7a-2-3p, miR-493-5p, let-7g-3p, miR-2318, miR-190a-3p, miR-1948, miR-485-5p, miR-488-3p, miR-381-3p, miR-23b, miR-

miR-1343-5p, miR-125a-5p, novel\_51, miR-146a, miR-130b-5p, miR-27b-3p, miR-219a-1-3p, miR-431-3p, miR-3071-5p, miR-1843b-5p, miR-1434-3p, miR-194-3p, novel\_116, miR-2355-3p, miR-412-5p, miR-185-5p, miR-22-5p, miR-656-5p, miR-4324, miR-326-3p, miR-211, miR-1839-3p, miR-1193, miR-342-3p, miR-219b-3p, miR-2319a, miR-146b-5p, miR-378f, miR-1306, miR-150-5p, miR-216a-3p, miR-18a-3p, miR-2387, miR-6535, miR-669, miR-2404, miR-329-5p, miR-216b-3p, miR-543-5p, novel\_127, novel\_96, miR-2898, miR-191-3p, miR-3071-3p, miR-217, miR-219-3p, miR-490-3p, miR-1271-3p, miR-29b-2-5p, miR-181a-2-3p, miR-4286, miR-128-3p, miR-1343-5p, miR-330-5p, miR-2284z, miR-214-5p, miR-9-5p, miR-378h, miR-1224-5p, miR-204-5p, miR-486b-3p, miR-125b-5p, miR-551b-3p, miR-370-5p, miR-378c, miR-1197-3p, miR-193a-5p, miR-6128, miR-1814c, miR-2318, miR-324-5p, miR-133c, miR-300-3p, miR-215-5p, miR-125a, miR-574-5p, miR-874-3p, miR-146b, miR-214-3p, miR-491-5p, miR-29b-1-5p, miR-2957, miR-342, miR-326, miR-1306-5p, miR-2310, miR-378d, miR-1839-3p, miR-3120-5p, miR-378c, miR-6529a, miR-378b, miR-148b-5p, miR-9788-3p, miR-216a-3p, miR-5010-3p, miR-27a-3p, novel\_78, miR-371a-5p, miR-218-5p, miR-423-5p, miR-219a-2-3p, miR-9-5p, novel\_60, miR-3956-3p, novel\_94, miR-877-3p, miR-27a-3p, miR-378e, miR-25, miR-489, miR-211-5p, miR-7977, miR-125b, miR-185-3p, miR-422a, miR-210-5p, miR-486-3p, miR-146a-5p, miR-2424, miR-29b-1-5p, miR-130a-5p, miR-369-3p, miR-133a-3p, miR-148a-5p, miR-142-3p, miR-33b-3p, miR-1197-5p, miR-378a-3p, miR-5703, miR-140-3p, miR-217-5p, miR-378i, miR-215-5p, miR-1b-3p, miR-3960, miR-18a-3p, miR-4492, miR-130b-5p, miR-6516-3p, miR-324-3p, miR-655-3p, miR-29b-2-5p, miR-3184-5p, miR-6134, miR-214, miR-3074-2-3p, miR-665-5p, miR-378c, miR-4510, miR-625-5p, novel\_99, miR-129b-3p, miR-655, novel\_25, miR-192-5p, miR-96-5p, miR-107, miR-2483-3p, miR-320c, miR-677, miR-2319b, miR-329-5p, miR-6119-3p, miR-499a-5p, miR-22-5p, miR-2284q, miR-133a-5p, miR-769-5p, miR-107-5p, novel\_27, miR-181d-5p, miR-495-3p, miR-544a, miR-181a-5p, miR-542-3p, miR-450c-3p, miR-216a-3p, miR-544b, miR-103, miR-103a-3p, miR-1343-3p, miR-103a-2-5p, miR-320b, miR-182-5p, miR-2285r, miR-539-3p, miR-8485, miR-2310, miR-130b-5p, miR-382-3p, miR-101-5p, miR-23a-5p, miR-582-5p, novel\_99, miR-1814c, miR-1248, miR-450a-1-3p, miR-320a, miR-544-3p, miR-582-5p, miR-769, miR-216b-5p, miR-1277-3p, miR-370-3p, miR-182-5p, miR-450b-3p, miR-130b-5p, miR-592, novel\_63, miR-3969, miR-320e, miR-769-5p, miR-181c-5p, miR-3184-3p, miR-129-2-3p, miR-145a-3p, miR-1271, miR-103b, miR-4429, miR-1246, miR-1290, miR-1197-5p, miR-23b-5p, miR-383-5p, miR-1271-5p, miR-450a-1-3p, miR-2284h-5p, miR-129-1-3p, miR-3600, miR-485-3p, miR-212-5p, miR-202-5p, miR-320d, miR-181b-5p, miR-127-5p, miR-107, miR-421-5p, miR-130a-5p, miR-2285w

KLK6

ENSOARGO(kallikrein)

MUC15

ENSOARGO(mucin 15)



miR-20a, miR-216c-5p, miR-2411, miR-2432, miR-143-3p, miR-2285i, miR-376a-5p, miR-421-5p, miR-29b-1-5p, miR-181b-1-3p, miR-377-5p, miR-185-3p, miR-221-5p, miR-320d, miR-212-5p, novel\_83, miR-15a-5p, miR-2904, miR-124-3p, miR-188-3p, miR-1197-5p, miR-5703, miR-140-3p, miR-126-3p, miR-193b-5p, miR-1246, miR-493-3p, miR-4429, miR-1271, miR-4510, miR-122-5p, miR-769-5p, miR-6525, miR-29c-5p, miR-29d-5p, miR-29b-2-5p, miR-190a-5p, miR-424-5p, miR-4492, miR-450b-3p, miR-3065-3p, miR-370-5p, miR-216b-3p, miR-221-5p, miR-22-3p, novel\_32, miR-204-3p, miR-877-5p, miR-15b-5p, miR-582-5p, miR-139-5p, miR-6130, miR-27b-5p, miR-598-3p, miR-21a-3p, miR-450a-1-3p, miR-186-5p, novel\_99, miR-582-5p, miR-1827, miR-345-5p, miR-339b, miR-124a, miR-1388-3p, miR-424-5p, miR-8485, miR-758-3p, miR-491-3p, miR-505, miR-29b-1-5p, miR-16b, miR-320b, miR-431-5p, miR-1306-5p, miR-199b-5p, miR-1185-5p, miR-181b-2-3p, miR-409b, miR-1343-3p, miR-548w, miR-2459, miR-147a, miR-412-3p, miR-30b-3p, miR-758-3p, miR-2284r, miR-484, miR-4791, miR-3120-5p, miR-1388-5p, miR-450b-5p, miR-190b-5p, miR-194b-5p, miR-2447, miR-361-3p, miR-769-5p, miR-2285y, miR-2285n, miR-2285t, miR-490-5p, miR-374a-3p, miR-4726-5p, miR-7689-3p, miR-2285u, miR-7977, miR-139-5p, miR-10b, miR-452-3p, miR-2319b, miR-203-3p, miR-7857-3p, miR-378g, miR-361-3p, miR-140-5p, miR-199b-5p, miR-877-3p, miR-1983, miR-96-5p, miR-668-5p, miR-29b-2-5p, miR-181a-2-3p, miR-2284f, miR-200a, miR-376b-5p, miR-199a-5p, miR-3065-3p, miR-2285b, miR-380-5p, miR-339a, miR-200a-3p, miR-543-5p, miR-450a-2-3p, miR-7641, novel\_79, miR-412, miR-431, miR-2285ad, miR-6517, miR-134-5p, miR-450a-1-3p, novel\_121, miR-486-5p, miR-322-5p, miR-1271-5p, miR-2411-5p, miR-134, miR-16-5p, miR-193a-5p, miR-1197-3p, miR-374a-3p, miR-331-3p, miR-410-5p, miR-551b-3p, miR-34c-3p, miR-370-

miR-376b-5p, miR-2387, miR-148a-3p, miR-216a-3p, miR-107, miR-135b-5p, miR-670-3p, miR-29a-3p, miR-6535, miR-3613, miR-29a, miR-206, novel\_1, miR-219b-3p, miR-29c-3p, novel\_101, miR-17-3p, miR-326-3p, miR-374c-5p, miR-653, miR-542-3p, miR-181a-5p, miR-223-3p, miR-450c-3p, miR-29b, miR-381-5p, miR-2284x, miR-2889, miR-103a-3p, miR-412-5p, miR-3535, miR-185-5p, miR-103, miR-377-3p, miR-190a, miR-654-3p, miR-381-3p, miR-488-3p, miR-376c-5p, miR-10b-3p, miR-2318, miR-329b, miR-376c-5p, miR-29b-3p, miR-135a-1-3p, miR-26c, miR-100-3p, miR-409-3p, miR-135a-5p, miR-592, miR-486b-3p, miR-6128, miR-3607-3p, miR-3578, miR-29d-3p, miR-330-5p, miR-582-3p, miR-300, miR-128-3p, miR-2285ad, miR-1224-5p, miR-505-5p, miR-302a-5p, miR-450a-1-3p, miR-664-3p, miR-219-3p, miR-3071-3p, miR-2898, miR-17-3p, miR-6536, miR-181b-5p, miR-107, miR-152-3p, miR-1, miR-29b-2-5p, miR-140-5p, miR-136-5p, miR-664b, miR-139-5p, miR-4792, miR-2319b, miR-2285n, miR-107-5p, miR-2447, miR-541-3p, miR-181d-5p, miR-219a-5p, miR-190b-5p, miR-219a-2-3p, miR-4791, miR-541, miR-143-5p, miR-1a-3p, miR-1388-5p, miR-101c, miR-21b, miR-1343-3p, miR-9788-3p, miR-216a-3p, miR-421, miR-326, miR-182-5p, miR-487b-5p, miR-381-5p, miR-103a-2-5p, miR-4532, miR-3613-5p, miR-450a-1-3p, miR-625-5p, miR-582-5p, miR-1827, miR-1277-3p, miR-216b-3p, miR-182-5p, miR-582-5p, miR-377-3p, miR-139-5p, miR-204-3p, miR-219b-3p, miR-132-5p, miR-29b-2-5p, miR-450b-3p, miR-17-3p, miR-129-5p, miR-190a-5p, miR-3184-3p, miR-206-3p, miR-122-5p, miR-338-3p, miR-181c-5p, miR-376a-5p, miR-1197-5p, miR-5703, miR-142-3p, miR-664-5p, miR-3600, miR-1b-3p, miR-148b-3p, novel\_83, miR-2284h-5p, miR-616-3p, novel\_17, miR-2285w, miR-376a-5p, miR-486-3p, miR-143-3p

miR-197-3p, miR-432, miR-744-5p, miR-138, miR-377-5p, miR-339-5p, miR-665, miR-187-3p, miR-2355-3p, novel\_116, miR-194-3p, miR-134-3p, let-7g-5p, miR-412-5p, miR-432-5p, novel\_51, miR-2331-5p, miR-106b-3p, miR-2483-5p, miR-6412, miR-2387, let-7e-5p, miR-378f, miR-376a-2-5p, miR-412-3p, miR-450b-3p, miR-10a-5p, miR-378b, miR-670-3p, miR-146b-3p, miR-2404, let-7i, novel\_87, miR-199c, miR-6123, miR-2285x, miR-199b-5p, miR-2428, novel\_27, miR-374c-5p, miR-326-3p, miR-371b-3p, miR-330-5p, miR-134, miR-10a-5p, miR-582-3p, let-7d, miR-376a-5p, miR-412, novel\_79, miR-6517, miR-486-5p, miR-134-5p, miR-378h, miR-9-5p, miR-339a, let-7c-5p, miR-3071-3p, miR-543-5p, let-7f-5p, miR-2403, miR-3064-5p, miR-490-3p, miR-3065-3p, let-7g, miR-199a-5p, miR-3154, miR-329a, miR-767, miR-1271, miR-370-3p, miR-199a-5p, miR-133c, miR-6740-5p, miR-2433, miR-134-5p, miR-486b-3p, miR-767-5p, miR-138-5p, miR-378c, miR-412-3p, miR-10b, miR-1298-5p, miR-378b, miR-329-3p, miR-3120-5p, miR-1839-5p, miR-2426, miR-362-3p, miR-378c, miR-222-5p, miR-2300a-5p, miR-199b-3p, novel\_78, miR-147a, miR-425-3p, miR-362-3p, miR-2957, miR-326, let-7e, miR-199b-5p, miR-3085-3p, miR-382-3p, miR-101b-3p, miR-1388-3p, let-7a-5p, miR-3187-3p, miR-378d, miR-199b-5p, miR-1983, miR-668-5p, miR-504, miR-7689-3p, miR-10b, miR-3064-5p, miR-4443, let-7d-5p, miR-378e, miR-7857-3p, miR-25, miR-378g, miR-4726-5p, miR-9-5p, miR-2447, miR-1197-5p, miR-378a-3p, miR-1961, miR-362-3p, novel\_133, miR-378i, miR-422a, miR-185-3p, miR-219b-5p, miR-324-3p, novel\_17, miR-196a-3p, let-7k, miR-98-5p, miR-486-3p, miR-377-5p, miR-500a-3p, miR-1827, miR-339b, miR-3065-3p, miR-378a-3p, miR-2331-3p, miR-504-5p, let-7i-5p, miR-204-3p, miR-6130, miR-10a, miR-324-3p, let-7f, miR-500, miR-6516-3p, miR-664a, miR-3074-2-3p, miR-4510, miR-145a-3p, miR-134-3p, miR-24-2-5p, miR-328-3p, miR-151-5p, miR-181b-2-3p, miR-885-3p, miR-155-5p, miR-541, miR-1197-5p, miR-24-2-5p, miR-628-5p, miR-1468, miR-377-3p, miR-342, miR-92a-1-5p, miR-500a-5p, miR-139-5p, miR-377-3p, miR-378g, miR-155-5p, miR-151b, miR-181b-3p, miR-677, miR-3074-5p, miR-139-5p, miR-24-1-5p, miR-615-5p, miR-3120-3p, miR-370-5p, miR-876-3p, miR-877-3p, miR-485-5p, miR-6395, miR-1895, miR-885-3p, miR-21a-3p, miR-541-3p, miR-3074-5p, miR-3059-5p, miR-342-3p, miR-1193, miR-155-5p, miR-1468-5p, miR-133a-5p, miR-370-5p, miR-34c-3p, miR-665, miR-324-3p, miR-455-5p, novel\_115, miR-30c-1-3p, miR-668-3p, miR-628-5p, miR-376b, miR-2284aa, miR-7862, miR-455-5p, miR-1a-3p, miR-22-3p, miR-6529a, miR-103, miR-421, miR-2459, miR-181b-2-3p, miR-187-3p, miR-103a-3p, miR-133b-5p, miR-379-3p, miR-206, novel\_1, miR-34c, miR-33a-3p, miR-4324, miR-6402, miR-449a, miR-877-3p, miR-17-3p, miR-6516-3p, miR-107, miR-361-3p, miR-409-5p, miR-677, miR-181b-3p, miR-2404, miR-34b, miR-655-5p, miR-107, miR-34b-5p, miR-17-3p, miR-30c-2-3p, miR-219b-5p, miR-125a-3p, miR-1, miR-34a-5p, miR-411-3p, miR-493-3p, miR-2904, miR-3591-5p, miR-2300b-3p, miR-582-3p, miR-2284z, miR-214-5p, novel\_121, miR-6517, miR-487a-5p, miR-17-3p, miR-100-3p, miR-206-3p, miR-4510, miR-3154, miR-22-3p, miR-34c-5p, miR-6130, miR-2285aa, miR-296-3p, miR-30c-1-3p

miR-195a-3p, miR-24-2-5p, miR-193a, novel\_39, novel\_115, miR-125a-3p, miR-365b-5p, miR-505, miR-17-3p, miR-200a-3p, miR-2285o, miR-147a, miR-1285, miR-2300b-3p, miR-1843b-5p, miR-ADAMTSL3 ENSOARGOC ADAMTS-1 2366, miR-33b-3p, miR-378d, miR-17-3p, miR-423-5p, miR-365a-5p, miR-3184-5p, miR-338-5p, miR-499a-5p, miR-17-3p, novel\_1, miR-24-1-5p, miR-21-3p, miR-552-3p, miR-7-1-3p, miR-141-3p, miR-3591-3p, miR-335-3p miR-381-3p, miR-2319a, miR-300, miR-2318, miR-329b, miR-615-5p, miR-370-3p, novel\_68, miR-154b-5p, miR-216a-3p, miR-194-3p, miR-149-5p, miR-6130, miR-320e, miR-1973, miR-1247-3p, miR-7134-3p, miR-2285t, miR-1277-5p, miR-760-3p, miR-4510 miR-150-5p, miR-3141, miR-148a-3p, miR-378f, miR-412-3p, novel\_68, miR-3074-5p, miR-669, miR-677, miR-181b-3p, miR-4324, miR-576-3p, miR-28c, miR-29a, miR-193b-3p, miR-29c-3p, miR-199b-5p, miR-197-3p, miR-22-3p, miR-432, miR-1843b-5p, miR-542-3p, miR-223-3p, miR-4508, miR-340-3p, miR-103a-3p, miR-149-5p, miR-194-3p, miR-134-3p, miR-3141, miR-2411-3p, novel\_51, miR-193a-3p, miR-483-3p, miR-432-3p, miR-93-5p, miR-20b-5p, miR-767, miR-345-5p, miR-2355-5p, miR-1271, miR-125a, miR-874-3p, miR-3959-5p, miR-125b-5p, miR-6740-5p, miR-2433, miR-134-5p, miR-592, novel\_42, miR-1197-3p, miR-1260b, miR-1343-5p, miR-330-5p, miR-1290, miR-412, miR-18b-5p, miR-134-5p, miR-129-1-3p, miR-505-5p, novel\_96, novel\_127, miR-152-3p, miR-3064-5p, miR-29a-5p, novel\_39, miR-2285b, miR-378j, miR-1983, miR-544-5p, miR-299b-5p, miR-504, miR-2319b, miR-4443, miR-378g, miR-2483-3p, novel\_82, miR-615, miR-1843a-3p, miR-2447, miR-423-5p, miR-877-3p, miR-361-3p, miR-2284r, miR-541, miR-1388-5p, miR-181b-2-3p, novel\_78, miR-455-3p, miR-2459, miR-1298-3p, miR-147a, novel\_19, miR-106b-5p, miR-199b-5p, miR-214-3p, miR-491-5p, miR-130b-3p, miR-1388-3p, miR-378d, miR-433-3p, miR-2285c, miR-1827, miR-345-5p, miR-552-3p, miR-504-5p, miR-2331-3p, miR-301a-3p, miR-151-3p, miR-665, miR-454-3p, miR-4492, miR-874-5p, miR-130b-5p, miR-214, miR-665-5p, miR-3074-5p, miR-129-2-3p, miR-3184-5p, miR-769-5p, miR-6525, miR-224-5p, miR-378a-3p, miR-378i, miR-133a-3p, miR-34a-5p, miR-493-3p, miR-212-5p, miR-18a-3p, miR-106a, miR-2284h-5p, miR-328-3p, miR-324-3p, miR-345-3p, miR-422a, novel\_17, miR-345-3p, miR-2285w, miR-486-3p, miR-181b-1-3p, miR-18a-3p, miR-18b, miR-9851-3p, miR-6395, miR-6516-3p, miR-450b-3p, miR-1291, miR-19a-3p, miR-107, miR-320b, miR-378b, miR-323a-5p, miR-2404, miR-29a-3p, miR-34b, miR-34c, miR-20a-5p, miR-

miR-33b-3p, miR-541-5p, miR-7977, miR-664b, miR-3064-5p, miR-203-3p, miR-27a-3p, miR-7857-3p, miR-2483-3p, miR-371a-5p, miR-101-3p, miR-490-5p, miR-2284q, miR-3958-3p, miR-335, miR-190b-5p, miR-452-5p, miR-181d-5p, miR-2284j, miR-2447, miR-8095, miR-412-3p, miR-329-3p, miR-4791, miR-2284aa, miR-1388-5p, miR-362-3p, miR-181b-2-3p, miR-145b, miR-27a-3p, miR-199b-3p, novel\_78, miR-105-1, miR-9788-3p, miR-455-3p, miR-148b-5p, miR-142-5p, miR-362-3p, miR-2957, miR-29b-1-5p, miR-326, novel\_103, miR-3085-3p, miR-491-5p, miR-3955-3p, miR-23a-3p, miR-652-5p, miR-101b-3p, miR-3187-3p, miR-8485, miR-411, miR-433-3p, miR-543-3p, novel\_99, miR-582-5p, miR-18a-5p, miR-30f, miR-21-3p, miR-370-5p, miR-552-3p, miR-140-5p, miR-496-3p, miR-660-5p, miR-1277-3p, miR-204-3p, miR-582-5p, miR-377-3p, miR-30a-3p, miR-665, miR-29b-2-5p, miR-2285j, miR-15b-3p, miR-30e-3p, miR-190a-5p, miR-4492, miR-130b-5p, miR-664a, miR-17-3p, miR-3958-5p, miR-539-5p, miR-145a-3p, miR-142a-5p, miR-362-3p, miR-376a-5p, miR-2300b-3p, miR-16-1-3p, miR-378d, miR-148a-5p, miR-19b-3p, miR-1b-3p, miR-212-5p, miR-23b-3p, miR-23c, miR-200b, miR-216a-5p, miR-345-3p, miR-26a-5p, miR-299-3p, miR-2284m, miR-369-3p, miR-195a-3p, miR-345-3p, miR-10a-3p, miR-329a-5p, miR-143-3p, miR-29b-1-5p, miR-376a-5p, miR-664b-3p, miR-181b-1-3p, miR-3970, miR-3591-3p, miR-21c, miR-376b-5p, miR-18b, miR-410-5p, miR-19a-3p, miR-26b-5p, miR-329-5p, miR-669, miR-144-3p, miR-677, miR-181b-3p, miR-374c-3p, miR-670-3p, miR-299b-3p, miR-29a-3p, miR-4324, miR-502-5p, miR-142b, miR-133a-5p, miR-147-5p, miR-502b, miR-199c, miR-6119-3p, novel\_1, miR-29a, miR-29c-3p, novel\_101, miR-495-3p, miR-17-3p, miR-1193, miR-2285x, miR-135a-2-3p, miR-335-5p, miR-326-3p, miR-2284w, miR-2428, miR-3959-3p, miR-145a-5p, novel\_23, miR-374b-3p, miR-708-3p, miR-2284v, miR-27b-3p, miR-2284ab, miR-

miR-668-3p, miR-6240, miR-22841, miR-2285v, miR-377-3p, miR-149-5p, novel\_116, miR-134-3p, miR-22-3p, miR-223-3p, miR-2113, miR-4508, miR-29c-3p, miR-335-5p, miR-301b-3p, miR-2284w, miR-412-5p, miR-142b, miR-576-3p, miR-28c, miR-29a, novel\_68, miR-320c, miR-216a-3p, miR-3591-3p, miR-148a-3p, miR-412-3p, miR-3064-5p, miR-450b-5p, miR-30f, miR-664-3p, miR-152-3p, novel\_127, miR-431, miR-2285ad, miR-2284z, miR-330-5p, miR-1290, novel\_42, miR-1260b, miR-100-3p, miR-191-5p, miR-99a-3p, miR-2355-5p, miR-2285aa, miR-542-5p, miR-1271, miR-93-5p, miR-20b-5p, miR-1248, miR-767, miR-329a, miR-329b, miR-345-5p, miR-8485, miR-106b-5p, miR-431-5p, miR-103a-2-5p, miR-130b-3p, novel\_78, miR-330-3p, miR-455-3p, miR-126a-5p, miR-411b-5p, miR-421, miR-501-3p, miR-329-3p, miR-541, miR-362-3p, miR-6527, miR-3956-3p, miR-423-5p, miR-361-3p, novel\_111, miR-2285u, miR-126b-5p, miR-500-3p, miR-499a-3p, miR-378g, miR-1983, miR-96-5p, miR-2285w, miR-486-3p, miR-324-3p, novel\_17, miR-210-5p, miR-3653-3p, miR-99a-3p, miR-18a-3p, miR-106a, miR-2284h-5p, miR-7859, miR-191, miR-193b-5p, miR-218-1-3p, miR-34a-5p, miR-665-5p, miR-3184-3p, miR-3184-5p, miR-181c-5p, miR-769-5p, miR-224-5p, miR-665, miR-2285j, miR-4492, miR-454-3p, miR-874-5p, miR-130b-5p, miR-669a-3p, miR-552-3p, miR-30c-1-3p, miR-548o-3p, miR-499b-3p, miR-377-3p, miR-10a, miR-301a-3p, miR-129b-3p, miR-625-5p, miR-1827, miR-345-5p, miR-130b-5p, miR-345-5p, miR-330-3p, miR-17-5p, miR-106a-5p, miR-224-5p, miR-130a-3p, miR-20b, miR-185-5p, miR-3071-5p, miR-181a-5p, miR-2889, miR-6239, miR-29b, miR-30b-3p, miR-1260b, miR-3957-3p, miR-17-3p, miR-2285x, miR-342-3p, miR-449a, miR-326-3p, miR-2428, miR-24-3p, miR-34c, miR-502-5p, miR-6529b, miR-20a-5p, miR-147-5p, miR-10a-5p, miR-323a-5p, miR-670-3p, miR-29a-3p, miR-34b, miR-18a-3p, miR-135b-5p, miR-505-3p, miR-450b-3p, miR-

miR-10b, miR-211-5p, miR-2285u, miR-489, miR-2483-3p, miR-378e, miR-25, let-7d-5p, miR-203-3p, miR-199b-5p, miR-221, miR-361-3p, miR-3059-5p, miR-194b-5p, miR-452-5p, miR-2285f, novel\_111, miR-877-3p, miR-101-3p, miR-2285n, miR-107-5p, miR-3958-3p, miR-548w, novel\_78, miR-330-3p, miR-145b, miR-221-3p, miR-143-5p, miR-378b, miR-544a, miR-2426, miR-1388-5p, miR-378c, miR-3120-5p, miR-101c, miR-1839-5p, miR-2284aa, miR-382-3p, miR-106a-5p, miR-101b-3p, let-7a-5p, miR-1388-3p, miR-378d, miR-30c-1-3p, miR-2310, miR-8485, miR-431-5p, miR-106b-5p, miR-182-5p, miR-2957, let-7e, miR-103a-2-5p, miR-199b-5p, miR-548o-3p, miR-660-5p, miR-378a-3p, miR-30c-1-3p, miR-182-5p, novel\_107, miR-21-3p, miR-370-5p, miR-193b-3p, miR-192-5p, miR-544-3p, let-7i-5p, miR-877-5p, miR-500a-3p, miR-2312, miR-625-5p, miR-378c, let-7b, miR-425-5p, let-7b-5p, let-7f, miR-222-3p, miR-3604, miR-500, miR-487a-5p, miR-106a, miR-548e-3p, miR-148b-3p, miR-7859, novel\_83, miR-2284h-5p, miR-215-5p, miR-1961, miR-2366, miR-1246, miR-378i, miR-378a-3p, miR-33b-3p, miR-216c-5p, miR-329a-5p, miR-20a, miR-130a-5p, novel\_17, miR-2285p, miR-422a, miR-216a-5p, miR-760-3p, miR-98-5p, miR-106a, let-7k, miR-329-5p, novel\_68, miR-3120-3p, miR-144-3p, miR-6535, miR-148a-3p, miR-2285ab, miR-3591-3p, miR-150-5p, miR-107, miR-450b-3p, miR-1291, let-7e-5p, miR-378f, miR-376a-2-5p, miR-7975, novel\_120, miR-1193, miR-193b-3p, miR-211, miR-199b-5p, miR-576-3p, miR-20a-5p, let-7i, miR-103a-3p, let-7g-5p, miR-20b, miR-103, miR-544b, miR-181a-5p, miR-1843b-5p, miR-1434-3p, miR-145a-5p, miR-194-5p, miR-1260b, miR-6240, miR-382, miR-432-3p, miR-106a-5p, miR-194a, miR-17-5p, miR-330-3p, miR-193a-3p, miR-660, miR-215-5p, miR-2355-5p, miR-2285aa, miR-154b-5p, miR-199a-5p, miR-301, miR-381-3p, miR-17-5p, miR-200a-5p, miR-92-5p, miR-3653-3p, miR-543-5p, miR-154-3p, miR-499a-5p, miR-3968, miR-181b-5p, miR-324-3p, miR-455-5p, miR-3187-3p, miR-539-3p, miR-181c-5p, miR-2285r, miR-487a, miR-455-5p, miR-154b-3p, miR-1434-3p, miR-1185-2-3p, miR-487a-3p, miR-670-3p, miR-154a-3p, miR-552-3p, miR-485-3p, miR-487a-3p

miR-148a-5p, miR-142-3p, miR-378a-3p, miR-378i, miR-2284h-5p, miR-23b-3p, miR-23c, miR-30d-3p, miR-18a-3p, miR-422a, miR-345-3p, miR-2285p, miR-2424, miR-664b-3p, miR-376a-5p, miR-181b-1-3p, miR-345-3p, miR-329a-5p, miR-2285w, miR-625-5p, miR-1827, miR-129b-3p, miR-487b-5p, miR-2285c, miR-15b-5p, miR-216b-3p, miR-32-5p, miR-454-3p, miR-4492, miR-130b-5p, novel\_74, miR-151-3p, miR-30a-3p, miR-664a-5p, miR-665, miR-30e-3p, miR-122-5p, miR-3184-5p, miR-181c-5p, miR-346, miR-224-5p, miR-214, miR-129-2-3p, miR-3074-5p, miR-1388-5p, miR-2284r, miR-541, miR-301b-5p, miR-148b-5p, miR-153, miR-147a, miR-376b-3p, miR-145b, miR-330-3p, miR-153-3p, miR-214-3p, miR-491-5p, miR-130b-3p, miR-29b-1-5p, miR-16b, miR-182-5p, miR-199a-3p, miR-431-5p, miR-2310, miR-378d, miR-23a-3p, miR-376a-3p, miR-1983, miR-3963, miR-136-5p, miR-378j, miR-203-3p, miR-144-5p, miR-4443, miR-378g, miR-2483-3p, miR-211-5p, miR-2319b, miR-301a-5p, miR-218-5p, novel\_82, miR-423-5p, novel\_111, miR-2447, miR-363-3p, miR-3956-3p, novel\_121, miR-129-1-3p, miR-322-5p, miR-1224-5p, miR-431, miR-299a-3p, miR-429-3p, novel\_96, novel\_127, miR-3071-3p, miR-30f, miR-200a, miR-450c-5p, miR-92b-3p, miR-3064-5p, miR-137-3p, miR-23b, miR-301, miR-25-3p, miR-125a, miR-574-5p, miR-874-3p, miR-503-3p, miR-592, miR-125b-5p, miR-494-5p, miR-1260b, miR-16-5p, miR-144-5p, miR-497-5p, miR-16b, miR-450c-3p, miR-19b-2-5p, miR-7b-5p, miR-223-3p, miR-194-3p, miR-149-5p, miR-412-5p, miR-134-3p, miR-31-5p, miR-483-3p, miR-32, miR-105-5p, novel\_51, miR-194a, miR-2411-3p, miR-7-5p, let-7j, miR-668-3p, miR-6240, miR-378f, miR-412-3p, miR-1306, miR-216a-3p, miR-3065-5p, miR-6535, miR-677, miR-181b-3p, miR-411b-3p, miR-299b-3p, miR-3120-3p, miR-329-5p, miR-216b-3p, miR-3074-5p, miR-421-5p, miR-6119-3p, miR-379-3p, miR-485-3p, miR-576-3p, miR-2284w, miR-378d, miR-140-3p, miR-1197-3p, miR-4792, miR-2285aa, miR-544-3p, miR-365a-3p, miR-2285ab, miR-21a-3p, miR-301, miR-150-5p, miR-378j, miR-411, miR-410-5p, miR-10b-3p, miR-7144-5p, miR-23a-5p, miR-28a-3p, miR-376a-3p, miR-2285f, miR-3958-5p, miR-425-5p, miR-194b-5p, miR-361-3p, miR-1285-5p, miR-2285m, miR-28c, miR-26c, miR-409-3p, miR-33a-3p, miR-708-5p, miR-28-5p, miR-2285ad, miR-409b, miR-758-5p, miR-483-3p, miR-9788-3p, miR-2284h-5p, miR-544b, novel\_121, miR-217-5p, miR-194-5p, miR-140-3p, miR-544a, miR-155-5p, miR-28b, miR-2432, miR-143-3p, miR-210-5p, miR-217, miR-194a, miR-450a-2-3p, miR-483-3p, miR-28-3p, miR-21-3p



miR-1, miR-306b-3p, miR-200a, miR-219-3p, miR-376b-3p, novel\_127, novel\_96, miR-17-3p, miR-7641, miR-299a-3p, miR-2284z, miR-6516-5p, miR-30a-5p, miR-29d-3p, miR-2427, miR-218-2-3p, miR-128-3p, miR-30c, miR-103b, miR-2284v, miR-1306-5p, miR-500b-5p, miR-409-3p, miR-2332, miR-99b-3p, miR-29b-3p, miR-28-5p, miR-592, miR-767-5p, miR-331-5p, miR-99a-3p, miR-2355-5p, miR-2284n, miR-331-5p, miR-362-5p, miR-23b, miR-331-5p, miR-301, miR-30e-5p, miR-1248, miR-329b, miR-767, miR-6240, miR-130b-5p, miR-330-3p, miR-146a, miR-26b-3p, miR-3955-5p, miR-149-5p, miR-185-5p, miR-2284d, novel\_23, miR-2113, miR-542-3p, miR-1434-3p, miR-27b-3p, miR-29b, miR-2284ab, miR-17-3p, miR-29c-3p, miR-135a-2-3p, miR-342-3p, novel\_27, miR-3613, miR-502-5p, miR-147-5p, miR-502b, miR-199c, miR-22-5p, miR-29a, miR-206, miR-3120-3p, miR-181b-3p, miR-677, miR-670-3p, miR-299b-3p, miR-29a-3p, miR-376b-3p, miR-378b, miR-3591-3p, miR-216a-3p, miR-18a-3p, miR-7975, miR-146b-5p, miR-2319a, miR-183-5p, miR-2424, miR-2432, miR-146a-5p, miR-181b-1-3p, miR-29b-1-5p, miR-210-5p, miR-30b, miR-299-3p, miR-30d, miR-99a-3p, miR-202-5p, miR-2284m, miR-18a-3p, novel\_83, miR-532-3p, miR-199a-3p, miR-23c, miR-340-5p, miR-23b-3p, miR-140-3p, miR-1434-5p, miR-188-3p, miR-1246, miR-30c-5p, miR-6134, miR-206-3p, miR-6525, miR-219b-3p, miR-130b-5p, miR-708-5p, miR-874-5p, miR-17-3p, miR-182-5p, miR-552-3p, miR-21-3p, miR-3065-3p, miR-656-3p, miR-499b-3p, miR-6516, miR-30d-5p, miR-3613-5p, miR-21a-3p, novel\_99, miR-1827, miR-30f, miR-23a-3p, miR-182-5p, miR-29b-1-5p, miR-2957, miR-199a-3p, miR-342, miR-146b, miR-491-5p, miR-181b-2-3p, miR-27a-3p, miR-199b-3p, miR-330-3p, miR-548w, miR-2459, miR-455-3p, miR-500-5p, miR-376b-3p, miR-1a-3p, miR-484, miR-2284aa, miR-2426, miR-452-5p, miR-219a-2-3p, miR-362-5p, miR-371a-5p, miR-2440, miR-30b-5p, miR-378c, novel\_42, miR-378c, miR-145a-3p, miR-1193, miR-665-5p, miR-3958-3p, miR-1306-3p, miR-370-5p, miR-378g, miR-378e, novel\_32, miR-378a-3p, miR-370-5p, miR-3956, miR-532-5p, miR-146b-5p, miR-378f, miR-671-5p, miR-1306-3p, miR-378d, novel\_39, miR-146a-5p, miR-652-5p, miR-491-5p, miR-1343-5p, miR-146b, novel\_96, miR-146a, miR-422a, miR-185-3p, miR-2331-5p, miR-432-5p, miR-378h, miR-134-3p, miR-149-5p, miR-148b-5p, miR-340-3p, miR-1343-3p, miR-1224-5p, miR-26b-3p, miR-493-3p, miR-378c, miR-184-3p, miR-148a-5p, miR-3120-5p, miR-378i, miR-432, miR-378b, miR-296-5p, miR-1343-5p, miR-378a-3p

miR-200b-3p, miR-10b-2, miR-411-3p, miR-582-3p, miR-545-5p, miR-214-5p, miR-24-2-5p, miR-483-3p, miR-7641, miR-92a-3p, miR-17-3p, miR-200c-3p, miR-181b-5p, miR-30c-2-3p, miR-376b-3p, miR-6119-5p, miR-200c, miR-1957a, miR-199a-5p, miR-1271-3p, miR-380-5p, miR-24-2-5p, miR-30a-3p, miR-4286, miR-7144-5p, miR-320a, miR-488-3p, miR-2448-3p, miR-199a-5p, miR-204-5p, miR-331-3p, miR-409-3p, miR-135a-5p, miR-145-3p, miR-6128, miR-133a-3p, miR-30b-3p, miR-380-3p, miR-2284ab, miR-219a-1-3p, miR-3071-5p, miR-194-5p, miR-145a-5p, miR-653, miR-181a-5p, miR-6238, miR-2284d, miR-432-5p, miR-26b-3p, miR-452-5p, miR-330-3p, miR-224-5p, miR-345-5p, miR-382, miR-130b-5p, miR-195a-5p, miR-135b-5p, miR-19a-3p, miR-376b-3p, miR-2285ab, miR-323a-5p, miR-655-5p, miR-378b, miR-656-5p, miR-199c, miR-92a-3p, miR-16a, miR-33a-3p, miR-382-5p, miR-15a, novel\_27, miR-17-3p, let-7a-3p, miR-19b-3p, miR-2904, novel\_133, miR-199a-3p, miR-340-5p, miR-200b, miR-15a-5p, miR-30b-3p, miR-299-3p, miR-320d, miR-760-3p, miR-216a-5p, miR-146a-5p, miR-2432, novel\_99, let-7g-3p, miR-133b-3p, miR-2312, let-7f-1-3p, miR-877-5p, miR-323-5p, miR-139-5p, miR-182-5p, miR-140-5p, miR-208b-5p, miR-424-5p, miR-450b-3p, miR-17-3p, miR-19b-1-5p, miR-338-5p, miR-6134, miR-338-3p, miR-145a-3p, miR-2426, miR-30b-3p, miR-222-5p, miR-27a-3p, miR-105-1, miR-2300a-5p, miR-320b, novel\_103, miR-30c-1-3p, miR-33a-5p, miR-2330-5p, miR-424-5p, novel\_94, miR-199b-5p, miR-376d, miR-27a-3p, miR-3082-5p, miR-10b, miR-20a-3p, miR-107-5p, miR-219a-2-3p, miR-154a, miR-2285f, miR-181d-5p, miR-194b-5p, miR-452-5p, novel\_60, miR-3059-5p, miR-23b-5p, miR-450a-1-3p, novel\_121, miR-486-5p, miR-322-5p, miR-505-5p, miR-9-5p, miR-758-5p, miR-299a-3p, miR-429-3p, miR-28-3p, miR-127-5p, miR-30f, miR-8117, miR-219-3p, miR-200a, miR-450b-5p, miR-345-5p, miR-2318, miR-133c, miR-3050-5p, miR-134-5p, miR-193a-3p, miR-2319a, miR-125a-3p, miR-134, miR-205-5p, miR-142-3p, miR-142a-3p, miR-193b-3p, miR-489, miR-134-5p, miR-320b, miR-193b-3p

LIPN ENSOARGO(lipase,

EIF3L ENSOARGO(eukaryot

miR-200b-3p, miR-128-3p, miR-23b-5p, miR-1290, miR-129-1-3p, miR-24-2-5p, miR-7641, miR-376a-5p, miR-429-3p, novel\_127, miR-200c-3p, miR-30c-2-3p, miR-205-5p, miR-200c, miR-192-3p, miR-148b-5p, miR-24-2-5p, miR-29b-2-5p, miR-30a-3p, miR-181a-2-3p, miR-20b-5p, miR-7144-5p, miR-1814c, miR-485-5p, miR-2318, miR-137-3p, miR-574-5p, miR-204-5p, novel\_9, miR-6740-5p, novel\_63, miR-1306-3p, miR-145-3p, miR-6128, miR-1306-5p, novel\_42, miR-27b-3p, miR-188-5p, miR-3071-5p, miR-432, miR-149-5p, miR-194-3p, miR-2285g, miR-432-5p, miR-31-5p, miR-193a-3p, miR-146a, miR-503-3p, miR-146b-5p, miR-376a-2-5p, miR-150-5p, miR-3591-3p, miR-216a-3p, miR-18a-3p, miR-2285ab, miR-144-3p, miR-320b, novel\_68, miR-3074-5p, miR-382-5p, miR-33a-3p, miR-4324, miR-2428, miR-211, miR-193b-3p, miR-495-3p, miR-148a-5p, miR-142-3p, miR-140-3p, miR-376a-5p, miR-616-3p, miR-383-5p, miR-200b, miR-30d-3p, miR-18a-3p, miR-221-5p, miR-30b-3p, miR-21-3p, miR-466i-5p, miR-219b-5p, miR-196a-3p, novel\_17, miR-146a-5p, miR-143-3p, miR-376a-5p, miR-421-5p, miR-216c-5p, miR-582-5p, miR-2312, miR-500a-3p, miR-129b-3p, miR-2285c, novel\_32, miR-582-5p, miR-193b-3p, miR-21-3p, miR-532-5p, miR-221-5p, miR-140-5p, miR-30c-1-3p, miR-500, miR-874-5p, miR-129-5p, miR-4492, miR-487b-5p, miR-30a-3p, miR-29b-2-5p, miR-3604, miR-30e-3p, miR-3184-5p, miR-338-3p, miR-2330-3p, miR-3074-2-3p, miR-129-2-3p, miR-3074-5p, miR-3184-3p, miR-21b, miR-6529a, miR-2284r, miR-484, miR-455-3p, miR-9788-3p, miR-148b-5p, miR-1185-3p, miR-2285e, miR-153, miR-539-5p, miR-27a-3p, miR-2300a-5p, miR-146b, miR-153-3p, miR-2310, miR-30c-1-3p, miR-335-3p, miR-668-5p, miR-1306-3p, miR-140-5p, miR-4443, miR-27a-3p, miR-211-5p, miR-24-1-5p, miR-490-5p, miR-3968, miR-371a-5p, miR-218-5p, miR-382-3p, miR-423-5p, miR-2285f, miR-1296-5p, miR-6527

miR-339a, miR-30c-2-3p, miR-20b-5p, miR-543-5p, novel\_96, miR-17-3p, miR-2898, miR-4286, miR-3064-5p, miR-192-3p, miR-2285b, novel\_39, miR-148b-5p, miR-28b, miR-330-5p, miR-10a-5p, miR-128-3p, miR-431, novel\_79, miR-1224-5p, miR-412, miR-6517, miR-129-1-3p, miR-505-5p, miR-409-3p, miR-331-3p, miR-1306-3p, miR-370-5p, miR-2433, miR-2284k, miR-486b-3p, miR-193a-5p, miR-6128, miR-1197-3p, miR-3154, miR-1248, miR-23a-5p, miR-329b, miR-329a, miR-2474, miR-1271, miR-370-3p, miR-3068-3p, miR-2284n, miR-769, miR-34c-5p, novel\_51, miR-2285v, miR-377-3p, miR-466f-3p, miR-452-5p, miR-106b-3p, miR-130b-5p, miR-503-3p, miR-1434-3p, miR-542-3p, miR-2284x, miR-26a-2-3p, miR-4508, miR-30b-3p, miR-2284ab, miR-339-5p, miR-194-3p, miR-3431, miR-134-3p, miR-412-5p, novel\_87, miR-34c, miR-28c, miR-6529b, miR-576-3p, miR-4324, miR-199c, miR-22-5p, novel\_1, miR-6119-3p, miR-1193, miR-17-3p, miR-326-3p, miR-449a, miR-24-3p, miR-216a-3p, miR-1306, miR-2387, miR-6395, miR-412-3p, miR-1291, miR-10a-5p, miR-655-5p, miR-320b, miR-378b, miR-329-5p, miR-34b, miR-92a-1-5p, miR-500a-5p, miR-324-3p, miR-216a-5p, miR-210-5p, novel\_17, miR-21-3p, miR-34b-5p, miR-221-5p, miR-30b-3p, miR-2284m, miR-329a-5p, miR-486-3p, miR-664b-3p, miR-1197-5p, miR-140-3p, miR-188-3p, miR-5703, miR-2904, miR-362-3p, novel\_133, miR-34a-5p, miR-184-3p, novel\_73, miR-941, miR-212-5p, miR-1b-3p, miR-328-3p, miR-532-3p, miR-665, miR-320e, miR-324-3p, miR-130b-5p, miR-874-5p, miR-4492, miR-17-3p, miR-664a, miR-214, miR-145a-3p, miR-4510, miR-129-2-3p, miR-338-3p, miR-6134, miR-3184-5p, miR-6525, miR-10b-5p, miR-769-5p, miR-129b-3p, miR-1827, miR-1895, miR-339b, miR-532-5p, miR-296-3p, miR-552-3p, miR-370-5p, miR-216b-3p, miR-504-5p, miR-30c-1-3p, miR-221-5p, miR-2331-3p, novel\_32, miR-204-3p, miR-216b-5p, miR-6120, miR-10a, miR-544-3p, miR-129-5p, miR-2284c, miR-377-3p, miR-140-5p, miR-32-5p, miR-215-5p, miR-25-3p, miR-374c-3p, miR-301a-3p, let-7i-5p, miR-15b-5p, miR-450a-1-3p, miR-503-3p, miR-21a-3p, miR-433-3p, miR-137-3p, miR-186-5p, miR-1248, miR-485-5p, miR-190a-3p, let-7b, miR-16-5p, miR-1271, let-7b-5p, miR-5100, miR-29b-3p, let-7f, miR-409-3p, miR-155-5p, miR-450b-3p, miR-454-3p, miR-424-5p, miR-3600, miR-1271-5p, miR-15a-5p, miR-322-5p, miR-450a-1-3p, miR-2284h-5p, miR-215-5p, miR-1290, miR-1961, miR-1246, miR-196a-5p, miR-345-3p, miR-29d-3p, let-7d, miR-411-3p, miR-378d, miR-16-1-3p, miR-2285w, miR-345-3p, miR-142a-3p, miR-92b-3p, let-7g, miR-618, miR-2285af, miR-345-3p, let-7c-5p, miR-500a-5p, let-7f-5p, miR-6536, miR-98-5p, miR-92a-3p, miR-21-3p, let-7k, miR-1277-5p, miR-3120-3p, miR-29a-3p, let-7d-5p, miR-150-5p, miR-96-5p, let-7e-5p, miR-544-5p, miR-9-3p, miR-195a-5p, miR-493-5p, miR-29c-3p, miR-301b-3p, miR-9-3p, miR-133a-5p, miR-4324, miR-382-3p, miR-15a, let-7i, miR-16a, miR-29a, miR-92a-3p, miR-490-5p, novel\_4, miR-3955-5p, miR-130a-3p, miR-142-3p, let-7g-5p, miR-2459, miR-7857, miR-101a-5p, miR-16-1-3p, miR-2426, miR-29b, miR-16b, miR-497-5p, miR-493-5p, miR-424-5p, let-7a-5p, miR-2411-3p, miR-16b, miR-32, miR-130b-3p, miR-196b-5p, let-7e

|        |                     |                                                                                                                                                                                                                                                                                                                                                                                                                                                                                                                                                                                                                                                                     |
|--------|---------------------|---------------------------------------------------------------------------------------------------------------------------------------------------------------------------------------------------------------------------------------------------------------------------------------------------------------------------------------------------------------------------------------------------------------------------------------------------------------------------------------------------------------------------------------------------------------------------------------------------------------------------------------------------------------------|
| IFT122 | ENSOARGO( intrafla. | miR-552-3p, miR-3960, miR-129-1-3p, novel_69, novel_23, miR-2285ab, miR-3141, miR-493-5p, miR-133a-3p, miR-1248, miR-2312, miR-380-3p, miR-582-3p, miR-363-5p, miR-6527, miR-2285f, miR-1296-5p, miR-3059-5p, miR-129-2-3p, miR-493-5p, miR-3141, miR-185-3p, novel_51, miR-338-5p, novel_17, miR-142b, miR-1277-5p, miR-4492, miR-466f-3p, miR-4726-5p<br>miR-147-3p, miR-376a-3p, miR-625-5p, miR-582-5p, miR-186-5p, miR-376b-3p, miR-301a-3p, miR-582-5p, miR-223-5p, miR-6535, miR-376d, novel_68, novel_74, miR-454-3p, miR-22-5p, miR-199c, miR-2285y, miR-338-5p, miR-224-5p, miR-7705, miR-301b-3p, miR-2284w, miR-590-3p, novel_60, miR-342-3p, miR-3956- |
| ZC3H8  | ENSOARGO( zinc fin. | 3p, miR-6128, miR-1434-5p, miR-7859, miR-376b-3p, miR-1298-3p, miR-411-5p, miR-149-5p, miR-1185-3p, miR-421, miR-548e-3p, miR-199b-3p, miR-130a-3p, miR-3600, miR-2898, miR-130b-3p, miR-224-5p, miR-376b-3p, miR-342, miR-2397-5p, miR-377-3p, miR-210-5p, miR-181c-3p, miR-654-3p, miR-125b-2-3p, miR-8485, miR-29a-5p, miR-143-3p, let-7f-2-3p, let-7f-2-3p<br>miR-2411, miR-199a-5p, miR-490-3p, miR-199b-5p, miR-181b-5p, miR-210-5p, novel_103, miR-151-5p, miR-455-3p, miR-1247-5p, miR-383-5p, miR-2411-5p, miR-7641, miR-222-5p, miR-                                                                                                                      |
| RNF34  | ENSOARGO( ring fin. | 2426, miR-1434-5p, miR-181a-5p, miR-199b-5p, miR-181c-5p, miR-181d-5p, miR-2447, miR-539-5p, miR-4510, miR-2433, miR-199a-5p, miR-204-3p, miR-151b, miR-2483-3p, miR-6130, miR-2355-5p, miR-543-3p, miR-7144-5p, miR-199b-5p<br>miR-124-3p, miR-33b-3p, miR-141-3p, miR-211-                                                                                                                                                                                                                                                                                                                                                                                        |
| PRR32  | ENSOARGO( proline   | 5p, novel_116, miR-197-5p, miR-200a-3p, miR-204-5p, novel_1, novel_74, miR-124a, miR-135a-2-3p, miR-1271-3p, miR-1957a, miR-200a, miR-211                                                                                                                                                                                                                                                                                                                                                                                                                                                                                                                           |

miR-320b, miR-199a-3p, miR-29b-1-5p, let-7e, let-7a-5p, miR-494-3p, miR-382-3p, miR-101b-3p, miR-30c-1-3p, miR-491-3p, miR-2310, miR-6529a, miR-101c, miR-330-3p, miR-548w, miR-151a-3p, miR-27a-3p, miR-142-5p, miR-9788-3p, miR-500-5p, miR-1185-3p, miR-2459, miR-30b-5p, miR-382-3p, miR-2440, miR-101-3p, miR-3958-3p, miR-3968, miR-1296-5p, miR-9-5p, miR-190b-5p, miR-452-5p, miR-362-5p, novel\_111, miR-8095, miR-219a-2-3p, miR-140-5p, miR-136-5p, miR-493-5p, miR-544-5p, miR-664b, miR-541-5p, miR-499b-5p, miR-25, miR-2483-3p, let-7d-5p, miR-27a-3p, miR-1185-2-3p, miR-30b, miR-210-5p, miR-2285p, miR-500a-5p, miR-345-3p, miR-320d, miR-98-5p, miR-30d, let-7k, miR-216c-5p, miR-369-3p, miR-345-3p, miR-376a-5p, miR-664b-3p, miR-29b-1-5p, miR-2424, miR-30c-5p, miR-1961, miR-376a-5p, miR-1434-5p, miR-1193, miR-140-3p, novel\_73, miR-4429, miR-16-1-3p, miR-3600, miR-30d-3p, miR-340-5p, miR-199a-3p, let-7f, miR-2285j, miR-30e-3p, miR-219b-3p, miR-151-3p, miR-369-5p, miR-30a-3p, miR-655-3p, miR-29b-2-5p, novel\_74, miR-6516-3p, miR-17-3p, miR-190a-5p, let-7b, miR-2330-3p, miR-142a-5p, let-7b-5p, miR-655, miR-411, miR-30d-5p, miR-30f, miR-339b, miR-543-3p, miR-186-5p, miR-32-5p, miR-140-5p, miR-30c-1-3p, miR-545-3p, miR-377-3p, miR-216b-5p, novel\_25, let-7i-5p, miR-377-3p, miR-190a, miR-32, miR-330-3p, miR-2411-3p, miR-493-5p, miR-6240, miR-382, miR-628-5p, miR-654-3p, miR-2285r, miR-432-3p, miR-432, miR-542-3p, miR-1434-3p, miR-3071-5p, miR-380-3p, miR-16-1-3p, miR-369-5p, miR-27b-3p, miR-3955-5p, miR-339-5p, miR-412-5p, miR-432-5p, miR-185-5p, let-7g-5p, miR-194-3p, miR-411-5p, miR-28c, let-7i, miR-382-5p, miR-92a-3p, novel\_120, miR-135a-2-3p, miR-17-3p, miR-2285x, miR-374c-5p, miR-2285m, miR-216a-3p, miR-378b, miR-9851-3p, miR-379-5p, miR-6516-3p, let-7e-5p, miR-216b-3p, miR-144-3p, miR-320c, miR-205-5p, miR-664-

DNAH7      ENSOARGO(dynein),

miR-19b-3p, miR-5703, novel\_133, miR-2408, miR-2366, miR-2284h-5p, miR-532-3p, miR-1247-5p, miR-18a-3p, miR-106a, miR-21-3p, miR-106a, miR-486-3p, miR-20a, miR-2285w, miR-503-5p, miR-1827, miR-339b, miR-500a-3p, miR-129b-3p, miR-22-3p, novel\_32, miR-301a-3p, miR-552-3p, miR-454-3p, miR-500, miR-874-5p, miR-130b-5p, novel\_74, miR-664a, miR-324-3p, miR-3184-5p, miR-6134, miR-214, miR-433-5p, miR-21b, miR-3120-5p, miR-1388-5p, miR-125b-2-3p, miR-1185-3p, miR-199b-5p, miR-214-3p, miR-3085-3p, miR-130b-3p, miR-25-5p, miR-505, miR-106b-5p, miR-1306-5p, miR-4532, miR-1388-3p, miR-106a-5p, miR-101b-3p, miR-378j, miR-361-3p, miR-199b-5p, miR-652-3p, miR-203-3p, miR-4443, miR-7689-3p, miR-211-5p, miR-3064-5p, miR-24-1-5p, miR-1843a-3p, miR-1973, miR-423-5p, miR-7705, miR-212-3p, miR-411-3p, miR-1343-5p, miR-505-5p, miR-24-2-5p, miR-483-3p, novel\_79, novel\_127, miR-200a-3p, miR-339a, miR-1260a, miR-125a-3p, novel\_39, miR-199a-5p, miR-490-3p, miR-1271-3p, miR-24-2-5p, miR-3064-5p, miR-4286, miR-20b-5p, miR-485-5p, miR-1248, miR-93-5p, miR-17-5p, miR-199a-5p, miR-154b-5p, miR-365a-3p, miR-3965, miR-615-5p, miR-1271, miR-141-3p, miR-874-3p, miR-486b-3p, miR-204-5p, miR-331-3p, miR-144, miR-2433, miR-93, miR-1260b, miR-1306-5p, miR-455-5p, miR-7862, miR-1260b, miR-197-3p, miR-22-3p, miR-873a-5p, miR-542-3p, miR-2355-3p, miR-20b, miR-503-5p, miR-339-5p, miR-130a-3p, miR-133b-5p, miR-1343-5p, miR-124-5p, miR-483-3p, miR-378a-5p, miR-3141, miR-17-5p, miR-106a-5p, miR-455-5p, miR-503-5p, let-7f-2-3p, let-7f-2-3p, miR-130b-5p, miR-19a-3p, miR-1306, miR-150-5p, miR-18a-3p, miR-378b, miR-3141, miR-144-3p, miR-6535, miR-320b, miR-147-5p, miR-6119-3p, miR-128-1-5p, miR-379-3p, miR-4324, miR-20a-5p, miR-301b-3p, miR-199b-5p, miR-2428, miR-211, miR-24-3p, miR-1307-3p, novel\_120

miR-181a-5p, miR-19b-2-5p, miR-873a-5p, miR-145a-5p, miR-194-5p, miR-374b-3p, miR-450c-3p, miR-21-5p, miR-16b, miR-497-5p, miR-31-5p, miR-130a-3p, miR-185-5p, miR-3431, miR-412-5p, miR-20b, novel\_116, miR-106a-5p, novel\_51, miR-17-5p, miR-193a-3p, miR-493-5p, miR-130b-5p, miR-628-5p, miR-363-5p, miR-668-3p, miR-432-3p, miR-432-3p, miR-345-5p, let-7j, miR-148a-3p, miR-2285ab, miR-21c, miR-18a-3p, miR-216a-3p, miR-19a-3p, miR-135b-5p, miR-195a-5p, miR-411b-3p, miR-34b, miR-374c-3p, miR-181b-3p, miR-677, miR-20a-5p, miR-15a, novel\_87, miR-34c, miR-16a, novel\_1, miR-502b, miR-17-3p, miR-193b-3p, miR-301b-3p, miR-199b-5p, miR-2284w, miR-2428, miR-449a, miR-326-3p, miR-134, miR-1290, miR-330-5p, miR-128-3p, miR-431, miR-2411-5p, miR-322-5p, miR-9-5p, novel\_121, miR-134-5p, miR-450a-1-3p, miR-125a-3p, miR-219-3p, miR-30c-2-3p, miR-181b-5p, miR-127-5p, miR-17-3p, miR-450a-2-3p, miR-2898, novel\_96, miR-152-3p, novel\_127, miR-3529-3p, miR-2385-3p, miR-30a-3p, miR-3064-5p, miR-24-2-5p, miR-148b-5p, miR-450c-5p, miR-490-3p, miR-199a-5p, miR-200a, novel\_39, miR-29a-5p, miR-3154, miR-17-5p, miR-93-5p, miR-345-5p, miR-329a, miR-671-5p, miR-1248, miR-1814c, miR-3074-1-3p, miR-7144-5p, miR-20b-5p, miR-2355-5p, miR-3965, miR-34c-5p, miR-199a-5p, miR-135a-1-3p, miR-5100, miR-551b-3p, miR-135a-5p, miR-6740-5p, miR-134-5p, miR-374b-3p, miR-16-5p, miR-374a-3p, miR-93, miR-484, miR-329-3p, miR-125b-2-3p, miR-7857, miR-450b-5p, miR-2426, miR-1388-5p, miR-362-3p, miR-1839-5p, miR-101c, novel\_78, miR-548w, miR-145b, miR-181b-2-3p, miR-1298-3p, miR-421, miR-2459, miR-148b-5p, novel\_103, miR-431-5p, miR-326, miR-106b-5p, miR-16b, miR-2957, miR-362-3p, miR-130b-3p, miR-491-5p, miR-3085-3p, miR-103a-2-5p, miR-214-3p, miR-199b-5p, miR-424-5p, miR-2330-5p, miR-106a-5p, miR-124a, miR-1388-3p, miR-652-5p, miR-376b, miR-30c-1-3p, miR-2310, miR-



let-7a-2-3p, miR-501-3p, miR-2427, miR-134, novel\_121, miR-134-5p, miR-483-3p, miR-758-5p, miR-1271-5p, miR-6516-5p, miR-18b-5p, miR-6517, miR-200a-3p, miR-181b-5p, miR-127-5p, miR-17-3p, miR-2397-5p, miR-125a-3p, miR-376b-3p, miR-1260a, miR-2285af, miR-380-5p, miR-148b-5p, miR-30a-3p, miR-1, miR-29b-2-5p, miR-1814c, miR-20b-5p, novel\_48, let-7g-3p, miR-18a, miR-17-5p, miR-93-5p, miR-2448-3p, miR-488-3p, miR-3965, miR-141-3p, miR-125a, miR-370-3p, miR-2355-5p, miR-486b-3p, miR-374b-3p, miR-134-5p, miR-204-5p, miR-138-5p, miR-125b-5p, miR-370-5p, miR-2284k, miR-365a-5p, miR-145-3p, miR-1260b, miR-374a-3p, miR-93, miR-6128, novel\_42, miR-2284x, miR-744-5p, miR-1260b, miR-138, miR-21-5p, novel\_23, miR-181a-5p, miR-708-3p, miR-20b, miR-149-5p, miR-503-5p, miR-134-3p, miR-665, miR-133b-5p, miR-106b-3p, miR-125a-5p, miR-483-3p, miR-378a-5p, novel\_51, miR-106a-5p, miR-17-5p, miR-365b-5p, miR-330-3p, miR-296-3p, miR-503-5p, let-7a-2-3p, miR-296-3p, miR-654-3p, miR-2285r, miR-668-3p, miR-6240, miR-130b-5p, miR-380-5p, miR-6516-3p, miR-9851-3p, miR-21c, miR-376b-3p, miR-2387, miR-18b, miR-6535, miR-329-5p, miR-3074-5p, miR-216b-3p, miR-147-5p, miR-421-5p, miR-203b-5p, miR-206, novel\_1, miR-382-5p, miR-20a-5p, miR-2284w, miR-211, miR-17-3p, miR-1193, miR-3957-3p, miR-342-3p, miR-148a-5p, miR-133a-3p, miR-188-3p, miR-5703, miR-1193, miR-193b-5p, miR-532-3p, miR-340-5p, miR-30d-3p, miR-106a, miR-21-3p, miR-1277-5p, miR-106a, miR-2284m, miR-92a-1-5p, miR-125b, miR-219b-5p, miR-486-3p, miR-29b-1-5p, miR-345-3p, miR-20a, miR-195a-3p, miR-503-5p, miR-329a-5p, miR-1827, miR-625-5p, miR-543-3p, miR-18a-5p, let-7g-3p, miR-6516, miR-296-3p, novel\_107, miR-216b-3p, miR-370-5p, miR-130b-5p, miR-487a-5p, miR-17-3p, miR-29b-2-5p, miR-320e, miR-665, miR-30a-3p, miR-30e-3p, miR-2285i, miR-181c-5p, miR-3184-5p, miR-206-3p, miR-246, miR-330-5p, miR-5703, miR-23b-5p, let-7a-3p, miR-133a-3p, miR-200b-3p, miR-128-3p, miR-431, miR-7641, miR-6517, miR-222, miR-3960, miR-548e-3p, novel\_121, miR-6516-5p, miR-200b, miR-210-3p, miR-487a-3p, miR-7859, miR-185-3p, miR-324-3p, miR-200c, miR-210-5p, miR-2285af, miR-200c-3p, miR-17-3p, miR-3064-5p, miR-487a, miR-500a-3p, let-7f-1-3p, miR-21a-3p, miR-1248, miR-23a-5p, miR-7144-5p, miR-329b, miR-154b-3p, miR-532-5p, miR-154a-3p, miR-3068-3p, miR-487a-3p, miR-2331-3p, miR-6516, miR-301a-3p, miR-665, miR-100-3p, miR-2285j, miR-222-3p, let-7b-3p, miR-130b-5p, miR-874-5p, miR-500, miR-4492, miR-1468-5p, miR-454-3p, miR-17-3p, miR-214, miR-145a-3p, novel\_42, miR-145-3p, miR-6525, miR-197-3p, miR-873a-5p, miR-484, miR-450b-5p, miR-1388-5p, miR-548w, miR-133b-5p, miR-1343-3p, miR-421, miR-221-3p, miR-153, miR-2331-5p, novel\_19, miR-5126, miR-326, miR-431-5p, miR-1468, miR-214-3p, miR-103a-2-5p, miR-153-3p, miR-452-5p, miR-130b-3p, miR-3085-3p, miR-628-5p, let-7c-3p, miR-130b-5p, miR-539-3p, miR-654-3p, miR-216a-3p, miR-221, miR-19a-3p, miR-7977, miR-20a-3p, miR-3064-5p, miR-3596, miR-425-5p, miR-107-5p, miR-502-5p, miR-4324, miR-218-5p, miR-154-3p, miR-203b-5p, miR-17-3p, miR-212-3p, miR-301b-3p, miR-326-3p, miR-361-3p

|        |                     |                                                                                                                                                                                                                                                                                                                                                                                                                                                                                                                                                                                                                                                                                                                                                                                                                                                                                                                                                                                                                                                                                                                                                                                                                                                                                                                                                                                                                                                                                                                                                                                                                                                                                                                                                                                                                                                                                                                                                                                                                                                                                                                                                                                                                                                                                                                                                                                                                                                                                                                                                                                                                                                                                                                                                                                                                           |
|--------|---------------------|---------------------------------------------------------------------------------------------------------------------------------------------------------------------------------------------------------------------------------------------------------------------------------------------------------------------------------------------------------------------------------------------------------------------------------------------------------------------------------------------------------------------------------------------------------------------------------------------------------------------------------------------------------------------------------------------------------------------------------------------------------------------------------------------------------------------------------------------------------------------------------------------------------------------------------------------------------------------------------------------------------------------------------------------------------------------------------------------------------------------------------------------------------------------------------------------------------------------------------------------------------------------------------------------------------------------------------------------------------------------------------------------------------------------------------------------------------------------------------------------------------------------------------------------------------------------------------------------------------------------------------------------------------------------------------------------------------------------------------------------------------------------------------------------------------------------------------------------------------------------------------------------------------------------------------------------------------------------------------------------------------------------------------------------------------------------------------------------------------------------------------------------------------------------------------------------------------------------------------------------------------------------------------------------------------------------------------------------------------------------------------------------------------------------------------------------------------------------------------------------------------------------------------------------------------------------------------------------------------------------------------------------------------------------------------------------------------------------------------------------------------------------------------------------------------------------------|
| TRAM2  | ENSOARGO( transloc. | <p>miR-1271-5p, miR-134-3p, miR-185-5p, miR-3431, miR-487a-3p, novel_83, miR-9788-3p, miR-133b-5p, miR-105-1, miR-485-3p, miR-212-5p, miR-26b-3p, miR-744-5p, miR-105-2, miR-2300b-3p, miR-223-3p, miR-296-5p, miR-6529a, miR-197-3p, miR-432-3p, miR-92b-3p, miR-432-3p, miR-3065-3p, miR-296-3p, miR-487a, miR-183-5p, miR-25-5p, novel_124, miR-92a-3p, miR-30b-3p, miR-210-5p, miR-296-3p, miR-105-5p, miR-6130, miR-378g, miR-4443, miR-363, miR-32-5p, miR-487a-3p, miR-532-5p, miR-296-3p, miR-3065-3p, miR-154a-3p, miR-370-3p, miR-154b-3p, miR-96-5p, miR-1291, miR-2387, miR-3184-5p, miR-145-3p, miR-423-5p, miR-363-3p, miR-539-5p, miR-3957-3p, miR-1271, miR-92a-3p, miR-154-3p, miR-874-5p, miR-2433, miR-324-3p, novel_82, miR-3956-3p, miR-2284j, miR-136-5p, miR-1983, miR-493-5p, miR-1306-3p, miR-499a-3p, miR-3596, miR-652-3p, miR-203-3p, miR-144-5p, miR-2284g, miR-139-5p, miR-374b-5p, miR-214-3p, miR-431-5p, miR-16b, miR-101b-3p, miR-1388-3p, miR-2284b, miR-23a-3p, miR-539-5p, miR-147a, miR-2459, miR-148b-5p, miR-130b-5p, miR-2285j, miR-181c-5p, miR-3074-5p, miR-3184-3p, miR-129-2-3p, miR-214, miR-1827, miR-186-5p, miR-30d-5p, miR-411, miR-655, miR-433-3p, miR-129b-3p, miR-216b-5p, miR-499b-3p, miR-582-5p, miR-15b-5p, miR-3653-3p, novel_17, miR-345-3p, miR-421-5p, miR-376a-5p, miR-143-3p, miR-369-3p, miR-184-3p, miR-2284u, miR-148a-5p, miR-16-1-3p, miR-1434-5p, miR-217-5p, miR-23c, miR-23b-3p, miR-6119-3p, miR-421-5p, miR-576-3p, miR-142b, miR-4324, miR-374c-5p, miR-335-5p, miR-1a-1-5p, miR-412-3p, miR-376b-5p, miR-3065-5p, miR-3591-3p, miR-216a-3p, miR-3970, miR-150-5p, miR-411b-3p, miR-374c-3p, miR-320c, miR-144-3p, miR-216b-3p, miR-3074-5p, miR-3120-3p, miR-2411-3p, miR-365b-5p, miR-105-5p, miR-432-3p, miR-2284l, miR-2285r, miR-432-3p, miR-493-5p, miR-16-1-3p, miR-16b, miR-2284x, miR-497-5p, miR-26a-2-3p, miR-223-3p, miR-542-3p, miR-1843b-5p, miR-19b-2-5p, novel_23, miR-22-3p, miR-412-5p, novel_116, miR-103a-3p, miR-31-5p, miR-2284k, novel_63, miR-2284v, miR-144-5p, miR-16-5p, miR-30e-5p, miR-376c-5p, miR-200a-5p, miR-300-3p, miR-2355-5p, miR-127-5p, miR-1a-2-5p, miR-200a-3p, miR-664-3p, miR-30f, miR-2285b, miR-2284y, miR-200a, miR-1290, miR-2427, miR-322-5p, novel_121, miR-129-1-3p, miR-2284z, miR-429-3p, miR-18b-5p, miR-431, miR-412, miR-335, miR-374a-3p, miR-2285t, miR-212-3p, novel_60, miR-452-5p, miR-181d-5p, miR-2285f, miR-3082-5p, miR-489, miR-20a-3p, miR-664b, miR-320b, miR-491-3p, miR-193a, miR-424-5p, miR-2426, miR-16-2-3p, miR-2284aa, miR-484, miR-30b-3p, miR-125b-2-3p, miR-412, miR-2320-3p, miR-142-5p, miR-625-5p, miR-4429, miR-320a, miR-3065-5p, miR-193b-5p, miR-2432, miR-142a-5p, miR-29c-5p, miR-425-5p, miR-1306-5p, miR-183-5p, miR-124-5p, miR-29d-5p, miR-320b</p> |
| ATP8A1 | ENSOARGO( ATPase,   | <p>miR-411b-3p, miR-374c-3p, miR-320c, miR-144-3p, miR-216b-3p, miR-3074-5p, miR-3120-3p, miR-2411-3p, miR-365b-5p, miR-105-5p, miR-432-3p, miR-2284l, miR-2285r, miR-432-3p, miR-493-5p, miR-16-1-3p, miR-16b, miR-2284x, miR-497-5p, miR-26a-2-3p, miR-223-3p, miR-542-3p, miR-1843b-5p, miR-19b-2-5p, novel_23, miR-22-3p, miR-412-5p, novel_116, miR-103a-3p, miR-31-5p, miR-2284k, novel_63, miR-2284v, miR-144-5p, miR-16-5p, miR-30e-5p, miR-376c-5p, miR-200a-5p, miR-300-3p, miR-2355-5p, miR-127-5p, miR-1a-2-5p, miR-200a-3p, miR-664-3p, miR-30f, miR-2285b, miR-2284y, miR-200a, miR-1290, miR-2427, miR-322-5p, novel_121, miR-129-1-3p, miR-2284z, miR-429-3p, miR-18b-5p, miR-431, miR-412, miR-335, miR-374a-3p, miR-2285t, miR-212-3p, novel_60, miR-452-5p, miR-181d-5p, miR-2285f, miR-3082-5p, miR-489, miR-20a-3p, miR-664b, miR-320b, miR-491-3p, miR-193a, miR-424-5p, miR-2426, miR-16-2-3p, miR-2284aa, miR-484, miR-30b-3p, miR-125b-2-3p, miR-412, miR-2320-3p, miR-142-5p, miR-625-5p, miR-4429, miR-320a, miR-3065-5p, miR-193b-5p, miR-2432, miR-142a-5p, miR-29c-5p, miR-425-5p, miR-1306-5p, miR-183-5p, miR-124-5p, miR-29d-5p, miR-320b</p>                                                                                                                                                                                                                                                                                                                                                                                                                                                                                                                                                                                                                                                                                                                                                                                                                                                                                                                                                                                                                                                                                                                                                                                                                                                                                                                                                                                                                                                                                                                                                                                                                                            |
| TSPAN8 | ENSOARGO( tetraspa. | <p>miR-425-5p, miR-1306-5p, miR-183-5p, miR-124-5p, miR-29d-5p, miR-320b</p>                                                                                                                                                                                                                                                                                                                                                                                                                                                                                                                                                                                                                                                                                                                                                                                                                                                                                                                                                                                                                                                                                                                                                                                                                                                                                                                                                                                                                                                                                                                                                                                                                                                                                                                                                                                                                                                                                                                                                                                                                                                                                                                                                                                                                                                                                                                                                                                                                                                                                                                                                                                                                                                                                                                                              |

miR-2355-3p, miR-148b-5p, miR-3955-5p, miR-27a-3p, miR-130a-3p, miR-16b, miR-27b-3p, miR-455-5p, miR-26a-2-3p, miR-1434-3p, miR-653, miR-708-3p, miR-450c-3p, miR-323b, miR-3187-3p, miR-8485, miR-493-5p, miR-424-5p, miR-130b-3p, miR-196b-5p, miR-377-3p, miR-342, novel\_51, miR-16b, miR-182-5p, miR-455-5p, miR-32, miR-323b-3p, miR-499a-3p, miR-27a-3p, miR-668-5p, miR-19a-3p, miR-9-3p, miR-195a-5p, miR-493-5p, miR-216a-3p, miR-877-3p, miR-301b-3p, miR-1a-1-5p, miR-363-3p, miR-342-3p, miR-92a-3p, miR-628-3p, miR-154-3p, novel\_82, miR-15a, miR-16a, miR-15a-5p, miR-6516-5p, miR-322-5p, miR-383-5p, miR-2284h-5p, miR-450a-1-3p, miR-134-5p, miR-548e-3p, miR-19b-3p, miR-128-3p, miR-134, miR-196a-5p, miR-92b-3p, miR-143-3p, miR-2284a, miR-487a, miR-2285w, miR-1a-2-5p, miR-28-3p, miR-202-5p, miR-92a-3p, miR-374a-5p, miR-2285p, miR-500a-5p, miR-25-3p, miR-301a-3p, miR-377-3p, miR-300-3p, miR-6516, miR-15b-5p, miR-548o-3p, miR-32-5p, miR-487a-3p, miR-532-5p, miR-182-5p, miR-154a-3p, miR-154b-3p, miR-301, miR-450a-1-3p, miR-28a-3p, miR-590-3p, miR-539-5p, miR-425-5p, miR-16-5p, miR-450b-3p, miR-134-5p, miR-454-3p, miR-424-5p, miR-2332, miR-410-5p, miR-1-5p, miR-15b-3p, miR-1271-3p, miR-192-3p, miR-296-3p, miR-193a-3p, miR-153-3p, miR-455-5p, miR-182-5p, miR-92a-1-5p, miR-296-3p, miR-545-5p, miR-450a-1-3p, miR-1298-3p, miR-153, miR-24-2-5p, miR-26b-3p, miR-376a-5p, miR-378d, miR-455-5p, miR-155-5p, miR-16-1-3p, miR-16-1-3p, miR-5703, miR-450c-3p, miR-223-3p, miR-3591-5p, miR-145-3p, miR-211, miR-193b-3p, miR-147-5p, miR-204-5p, miR-2285t, miR-22-5p, novel\_9, miR-450b-3p, miR-664a-5p, miR-133a-5p, miR-218-5p, miR-324-5p, miR-193b-3p, miR-331-5p, miR-296-3p, miR-211-5p, miR-182-5p, novel\_99, miR-376a-2-5p, miR-1248, miR-6516-3p, miR-433-3p, miR-450a-1-3p, miR-9-5p, miR-3600, miR-7641, miR-18a-3p, miR-142-3p, miR-4429, miR-23b-5p, miR-140-3p, miR-3591-5p, miR-3578, miR-199a-5p, miR-2285b, miR-29b-1-5p, miR-105-3p, miR-221-5p, novel\_127, miR-200a-3p, miR-320d, miR-1260a, miR-199a-5p, miR-22-3p, miR-324-5p, miR-323-5p, miR-182-5p, miR-141-3p, miR-221-5p, miR-874-3p, novel\_99, miR-320a, miR-433-3p, miR-145-3p, miR-224-5p, miR-1260b, miR-144-5p, miR-103b, miR-539-5p, miR-145a-3p, miR-130b-5p, miR-324-3p, miR-338-5p, miR-2285j, miR-455-3p, miR-1185-3p, miR-153, miR-145b, miR-1260b, miR-22-3p, miR-145a-5p, miR-8485, let-7f-2-3p, let-7f-2-3p, miR-1388-3p, miR-130b-5p, miR-199b-5p, miR-153-3p, miR-378a-5p, miR-29b-1-5p, miR-182-5p, miR-320b, miR-320c, miR-144-5p, miR-1185-2-3p, miR-323a-5p, miR-25, miR-3082-5p, miR-655-5p, miR-335-3p, miR-18a-3p, miR-199b-5p, miR-199b-5p, miR-154a, miR-877-3p, miR-9-5p, novel\_60, miR-3059-5p, miR-3956-3p, miR-203b-5p, miR-421-5p

IFT74 ENSOARGO( intrafla

LRRC19 ENSOARGO( leucine

CENPJ ENSOARGO( centrome

|        |                   |                                                                                                                                                                                                                                                                                                                                                                                                                                                                                                                                                                                                                                                                                                                                                                                                                                         |
|--------|-------------------|-----------------------------------------------------------------------------------------------------------------------------------------------------------------------------------------------------------------------------------------------------------------------------------------------------------------------------------------------------------------------------------------------------------------------------------------------------------------------------------------------------------------------------------------------------------------------------------------------------------------------------------------------------------------------------------------------------------------------------------------------------------------------------------------------------------------------------------------|
| MKI67  | ENSOARGO(marker o | miR-30b-3p, miR-744-5p, miR-542-3p, miR-541, miR-30b-3p, miR-185-5p, miR-134-3p, miR-5126, miR-377-3p, miR-2285v, miR-3141, miR-8485, miR-4532, miR-2330-5p, miR-130b-5p, miR-23a-3p, miR-6395, miR-877-3p, miR-3141, miR-18a-3p, miR-34b, miR-378g, miR-452-3p, miR-3074-5p, miR-664b, miR-335, miR-128-1-5p, miR-2440, miR-218-5p, miR-34c, miR-2428, miR-449a, miR-541-3p, miR-335-5p, miR-184-3p, miR-33b-3p, miR-34a-5p, miR-23c, miR-302a-5p, miR-23b-3p, miR-328-3p, novel_83, miR-18a-3p, miR-3960, miR-1224-5p, miR-760-3p, miR-21-3p, novel_127, miR-34b-5p, miR-664-3p, miR-205-5p, miR-1271-3p, miR-1827, miR-1248, miR-21a-3p, miR-23b, miR-129b-3p, miR-377-3p, miR-34c-5p, miR-3957, miR-874-3p, miR-3957-5p, miR-2331-3p, miR-552-3p, miR-130b-5p, miR-4492, miR-34c-3p, miR-1197-3p, miR-10b-3p, miR-3074-5p, novel_42 |
| ANKS4B | ENSOARGO(ankyrin  | miR-2285n, miR-199a-3p, miR-140-5p, miR-1306-5p, miR-1306, miR-505, miR-140-5p, miR-503-3p, miR-6128, miR-665, miR-652-5p, miR-331-5p, miR-3082-5p, miR-199a-3p, miR-122-3p, miR-30d-3p, miR-487a-3p, miR-322-5p, miR-302a-5p, miR-23b-3p, miR-23c, miR-15a-5p, miR-9788-3p, miR-2459, miR-7857, miR-1434-5p, miR-16b, miR-493-3p, miR-380-3p, novel_73, miR-19b-3p, miR-1839-5p, miR-497-5p, miR-424-5p, miR-493-5p, miR-30a-3p, miR-29b-2-5p, miR-23a-3p, miR-181a-2-3p, miR-654-3p, miR-539-3p, miR-200a, miR-380-3p, miR-                                                                                                                                                                                                                                                                                                           |
| AZI2   | ENSOARGO(5-azacyt | 200c, miR-219-3p, miR-505, miR-16b, miR-122-3p, miR-202-5p, miR-200c-3p, miR-200a-3p, miR-141-3p, miR-582-5p, miR-216b-5p, miR-3082-5p, miR-15b-5p, miR-488-3p, miR-23b, let-7g-3p, miR-19a-3p, miR-493-5p, miR-582-5p, novel_99, miR-195a-5p, miR-16-5p, miR-452-5p, miR-219a-2-3p, miR-15a, miR-2285j, miR-30e-3p, miR-219b-3p, miR-30a-3p, miR-16a, miR-499a-5p, miR-424-5p, miR-22-5p                                                                                                                                                                                                                                                                                                                                                                                                                                               |

miR-101-3p, miR-218-5p, novel\_82, miR-2284q, miR-452-5p, miR-181d-5p, miR-2284j, miR-3956-3p, miR-212-3p, novel\_60, miR-219a-2-3p, miR-221, miR-140-5p, miR-376a-3p, miR-504, miR-7977, miR-2285u, miR-10b, miR-3064-5p, miR-139-5p, miR-27a-3p, miR-203-3p, miR-489, miR-2483-3p, miR-378g, miR-326, miR-342, miR-146b, miR-153-3p, miR-491-5p, miR-3085-3p, miR-1839-3p, miR-101b-3p, miR-124a, miR-2310, miR-193a, miR-8485, miR-30c-1-3p, miR-30b-3p, miR-1298-5p, miR-10b, miR-2284aa, miR-27a-3p, miR-409b, miR-421, miR-2285e, miR-148b-5p, miR-216a-3p, miR-221-3p, miR-539-5p, miR-153, miR-3604, miR-219b-3p, miR-2285j, miR-222-3p, miR-4492, miR-155-5p, miR-6516-3p, miR-450b-3p, miR-425-5p, miR-4510, miR-539-5p, miR-6134, miR-6525, miR-10b-5p, miR-450a-1-3p, miR-2285c, miR-186-5p, miR-543-3p, miR-216b-3p, miR-548o-3p, miR-496-3p, miR-30c-1-3p, miR-504-5p, miR-155-5p, miR-139-5p, miR-6130, miR-10a, miR-27a-5p, miR-377-3p, miR-192-5p, miR-185-3p, miR-500a-5p, miR-2285p, miR-210-5p, miR-30b-3p, miR-2284m, miR-2285w, miR-146a-5p, miR-2432, miR-1193, miR-188-3p, miR-1434-5p, miR-124-3p, miR-215-5p, miR-148a-5p, miR-361-5p, miR-218-1-3p, miR-493-3p, miR-505-3p, miR-3600, miR-548e-3p, miR-532-3p, miR-2284h-5p, miR-340-5p, miR-7859, miR-383-5p, miR-425-5p, miR-133a-5p, miR-576-3p, miR-4324, miR-502b, miR-147-5p, miR-656-5p, miR-379-3p, miR-29a, miR-29c-3p, miR-1839-3p, miR-135a-2-3p, novel\_120, miR-342-3p, miR-326-3p, miR-3065-5p, miR-378b, miR-376b-5p, miR-6516-3p, miR-505-3p, miR-146b-5p, miR-107, miR-10a-5p, miR-216b-3p, miR-144-3p, miR-29a-3p, miR-2404, miR-146a, miR-377-3p, miR-7-5p, miR-466f-3p, miR-101-5p, miR-654-3p, novel\_23, miR-450c-3p, miR-7b-5p, miR-181a-5p, miR-542-3p, miR-2113, miR-1434-3p, miR-2284x, miR-27b-3p, miR-26a-2-3p, miR-1260b, miR-138, miR-29a, miR-30b-3p, miR-26b-3p, miR-103a-3p, miR-240-3p, miR-216b-3p, miR-211-5p, miR-30c-1-3p, miR-204-3p, miR-877-5p, miR-582-5p, miR-489, miR-376c-5p, miR-376b-5p, miR-2387, miR-376c-5p, novel\_99, miR-582-5p, miR-10a-3p, miR-6527, miR-495-3p, miR-219b-3p, miR-2447, miR-211, miR-30a-3p, miR-100-3p, miR-34c-3p, miR-30e-3p, miR-708-5p, miR-199c, miR-204-5p, miR-28-5p, miR-30d-3p, miR-187-3p, novel\_4, miR-199b-3p, miR-199a-3p, miR-148b-5p, miR-3535, miR-1298-3p, miR-5703, miR-873a-5p, miR-4791, miR-3432b, miR-101a-5p, miR-30a-3p, miR-10a-3p, miR-101b-3p, miR-376b-5p, miR-8485, miR-376c-5p, miR-30c-1-3p, miR-30c-2-3p, miR-2957, miR-2331-5p, miR-199a-3p

TGS1

ENSOARGO( trimethy

TMEM19

ENSOARGO( transmem

miR-34b, miR-29a-3p, miR-677, miR-181b-3p, miR-3120-3p, miR-7-1-3p, miR-410-5p, miR-412-3p, miR-2285ab, miR-211, miR-449a, miR-301b-3p, miR-2285m, novel\_101, miR-29c-3p, miR-92a-3p, miR-29a, novel\_1, miR-203b-5p, miR-656-5p, miR-6529b, miR-34c, miR-33a-3p, miR-2285g, miR-185-5p, miR-194-3p, miR-31-5p, miR-377-5p, miR-26b-3p, miR-29b, miR-188-5p, miR-873a-5p, miR-181a-5p, miR-1434-3p, miR-197-3p, miR-483-3p, miR-105-5p, novel\_51, miR-2411-3p, miR-34c-5p, miR-25-3p, miR-2355-5p, miR-10b-3p, miR-329a, miR-3074-1-3p, miR-23a-5p, miR-671-5p, miR-145-3p, miR-204-5p, miR-592, miR-29b-3p, miR-3969, miR-9-5p, miR-24-2-5p, miR-483-3p, miR-129-1-3p, miR-2285ad, miR-6517, miR-412, miR-582-3p, miR-105-2, miR-155-5p, miR-345-3p, miR-29d-3p, miR-501-3p, miR-92b-3p, miR-1957a, miR-2284a, miR-2285b, miR-3529-3p, miR-30a-3p, miR-4286, miR-181b-5p, miR-92a-3p, miR-2285af, miR-125a-3p, miR-664-3p, miR-664b, miR-20a-3p, miR-7689-3p, miR-211-5p, miR-493-5p, miR-1983, miR-544-5p, miR-129b-5p, miR-877-3p, novel\_111, miR-502-3p, miR-3059-5p, miR-2447, miR-541-3p, miR-2285f, miR-9-5p, miR-181d-5p, miR-4726-5p, miR-2285n, miR-2440, miR-2285y, miR-107-5p, miR-1298-3p, miR-148b-5p, miR-9788-3p, miR-2459, miR-2285e, miR-105-1, miR-181b-2-3p, miR-362-3p, miR-1388-5p, miR-329-3p, miR-484, miR-541, miR-143-5p, miR-501-3p, miR-412-3p, miR-8485, miR-33a-5p, miR-130b-3p, miR-103a-2-5p, miR-1468, novel\_103, miR-362-3p, miR-182-5p, miR-301a-3p, miR-27a-5p, miR-216b-5p, miR-139-5p, miR-204-3p, miR-155-5p, miR-877-5p, miR-221-5p, miR-552-3p, miR-532-5p, miR-182-5p, miR-2312, miR-186-5p, novel\_99, miR-21a-3p, miR-2285c, miR-129b-3p, miR-27b-5p, miR-338-3p, miR-539-5p, miR-590-3p, miR-129-2-3p, miR-3184-3p, miR-3958-5p, miR-155-5p, miR-454-3p, miR-1468-5p, miR-30a-3p, miR-30a-3p, miR-7859, miR-999, miR-101c, miR-455-5p, miR-27b-3p, miR-2284x, miR-30b-3p, miR-2284ab, miR-1388-5p, miR-16-1-3p, miR-219a-1-3p, miR-30b-3p, miR-484, miR-9788-3p, miR-1185-3p, miR-153, miR-412-5p, miR-142-5p, miR-134-3p, miR-27a-3p, miR-153-3p, miR-3955-3p, miR-197-5p, miR-2411-3p, miR-455-5p, miR-320b, miR-224-5p, novel\_115, miR-1306-5p, miR-2310, let-7a-2-3p, miR-432-3p, miR-432-3p, let-7f-2-3p, miR-628-5p, let-7f-2-3p, miR-1388-3p, miR-101b-3p, miR-9-3p, miR-1306, miR-320c, miR-1185-2-3p, miR-27a-3p, miR-378g, miR-541-5p, miR-656-5p, miR-450a-5p, novel\_1, miR-133a-5p, miR-9-3p, miR-8095, miR-2284j, miR-135a-2-3p, miR-200b-3p, miR-16-1-3p, let-7a-2-3p, miR-4429, miR-5703, miR-217-5p, miR-345-3p, miR-2366, miR-582-3p, miR-545-5p, miR-7859, miR-302a-5p, miR-340-5p, miR-200b, miR-3600, miR-2285ad, miR-429-3p, miR-3653-3p, miR-450a-2-3p, miR-320d, miR-2284m, miR-127-5p, miR-200c-3p, miR-217, miR-92a-1-5p, miR-345-3p, miR-2285af, miR-200c, miR-6119-5p, miR-125a-3p, novel\_39, miR-200a, miR-486-3p, miR-450c-5p, miR-3074-1-3p, miR-1814c, miR-1248, let-7g-3p, let-7g-3p, miR-129b-3p, miR-3154, miR-320a, miR-300-3p, miR-2285aa, miR-216b-3p, miR-552-3p, miR-31-3p, miR-486b-3p, miR-6740-5p, novel\_63, miR-142a-5p, miR-6525, miR-224-5p, miR-2284v

CMPK2 ENSOARGO(cytidine

RNF17 ENSOARGO(ring fin

|         |                   |                                                                                                                                                                                                                                                                                                                                                                                                                                                                                                                                                                                                                                                                                                                                                                                                                                                                                                                                                                                                                                                                                                                                                                                                                                                                                                                                                                                                                                                                                                                                                                                                                                                                                                                                                                                                                                                                                                                                                   |
|---------|-------------------|---------------------------------------------------------------------------------------------------------------------------------------------------------------------------------------------------------------------------------------------------------------------------------------------------------------------------------------------------------------------------------------------------------------------------------------------------------------------------------------------------------------------------------------------------------------------------------------------------------------------------------------------------------------------------------------------------------------------------------------------------------------------------------------------------------------------------------------------------------------------------------------------------------------------------------------------------------------------------------------------------------------------------------------------------------------------------------------------------------------------------------------------------------------------------------------------------------------------------------------------------------------------------------------------------------------------------------------------------------------------------------------------------------------------------------------------------------------------------------------------------------------------------------------------------------------------------------------------------------------------------------------------------------------------------------------------------------------------------------------------------------------------------------------------------------------------------------------------------------------------------------------------------------------------------------------------------|
| TBPL1   | ENSOARGO(TBP-like | miR-214, miR-133a-3p, miR-329a-5p, miR-8095, miR-3604, miR-214-3p, miR-18b-5p, miR-541-5p, miR-329-5p, miR-670-3p, miR-18a, miR-301, miR-18b, miR-7862, miR-18a-5p, miR-133b-3p                                                                                                                                                                                                                                                                                                                                                                                                                                                                                                                                                                                                                                                                                                                                                                                                                                                                                                                                                                                                                                                                                                                                                                                                                                                                                                                                                                                                                                                                                                                                                                                                                                                                                                                                                                   |
| HGHI    | ENSOARGO(HGH1 hom | miR-342-3p, miR-370-3p, miR-6527, miR-3956, novel_39, miR-328-3p, miR-342, miR-30b-3p, miR-1388-5p, miR-1291, miR-30b-3p, miR-184-3p, miR-6395                                                                                                                                                                                                                                                                                                                                                                                                                                                                                                                                                                                                                                                                                                                                                                                                                                                                                                                                                                                                                                                                                                                                                                                                                                                                                                                                                                                                                                                                                                                                                                                                                                                                                                                                                                                                    |
| MOB3B   | ENSOARGO(MOB kina | miR-3120-5p, miR-7857, miR-10b, miR-484, miR-2459, miR-2285e, miR-9788-3p, miR-539-5p, miR-153, miR-105-1, novel_4, novel_78, miR-330-3p, let-7e, miR-153-3p, miR-25-5p, miR-3085-3p, miR-16b, miR-182-5p, miR-505, miR-1306-5p, miR-424-5p, let-7a-5p, miR-877-3p, miR-544-5p, miR-504, miR-668-5p, let-7d-5p, miR-203-3p, miR-3082-5p, miR-378g, miR-3596, miR-7977, miR-452-3p, miR-2319b, miR-4792, miR-3064-5p, miR-2440, novel_111, miR-2285f, miR-2447, miR-3059-5p, miR-133a-3p, miR-664-5p, miR-140-3p, miR-217-5p, miR-1961, miR-2300b-3p, novel_83, miR-15a-5p, miR-210-3p, miR-383-5p, miR-7859, miR-212-5p, miR-548e-3p, let-7k, miR-221-5p, miR-98-5p, miR-92a-1-5p, miR-196a-3p, miR-486-3p, miR-125b-2-3p, miR-186-5p, miR-2312, miR-655, miR-2285c, miR-15b-5p, let-7i-5p, miR-204-3p, miR-323-5p, miR-216b-5p, miR-10a, miR-296-3p, miR-532-5p, miR-182-5p, miR-370-5p, miR-660-5p, miR-140-5p, miR-504-5p, miR-221-5p, miR-2331-3p, miR-130b-5p, miR-424-5p, miR-4492, miR-17-3p, miR-450b-3p, miR-665, miR-655-3p, miR-19b-1-5p, let-7f, miR-2285j, miR-6134, let-7b-5p, miR-346, miR-10b-5p, miR-3184-3p, miR-145a-3p, miR-539-5p, let-7b, miR-2284x, miR-497-5p, miR-16b, miR-380-3p, miR-3071-5p, miR-450c-3p, miR-7b-5p, miR-103, miR-2355-3p, miR-149-5p, let-7g-5p, miR-134-3p, miR-2285g, miR-26b-3p, miR-103a-3p, miR-660, novel_51, miR-105-5p, miR-330-3p, miR-296-3p, miR-7-5p, miR-296-3p, miR-382, miR-6240, miR-130b-5p, miR-380-5p, miR-135b-5p, miR-195a-5p, let-7e-5p, miR-9851-3p, miR-2319a, miR-107, miR-3065-5p, miR-1306, miR-2285ab, miR-411b-3p, miR-323a-5p, miR-10a-5p, miR-655-5p, miR-320b, miR-216b-3p, miR-128-1-5p, let-7i, miR-16a, miR-133a-5p, miR-15a, miR-24-3p, miR-17-3p, miR-1193, miR-495-3p, miR-2285x, miR-10a-5p, let-7d, miR-23b-5p, miR-450a-1-3p, miR-582-3p, miR-322-5p, miR-542-5p, miR-200a-3p, miR-107, miR-101-3p, let-7f-5p, miR-203b-5p, miR-301, miR-665-5p, miR-140-3p |
| ANKRD22 | ENSOARGO(ankyrin  |                                                                                                                                                                                                                                                                                                                                                                                                                                                                                                                                                                                                                                                                                                                                                                                                                                                                                                                                                                                                                                                                                                                                                                                                                                                                                                                                                                                                                                                                                                                                                                                                                                                                                                                                                                                                                                                                                                                                                   |

|       |                    |                                                                                                                                                                                                                                                                                                                                                                                                                                                                                                                                                                                                                                                                                                                                                                                                                                                                                                                                                                                                                                                                                                                                                                                                                                                                    |
|-------|--------------------|--------------------------------------------------------------------------------------------------------------------------------------------------------------------------------------------------------------------------------------------------------------------------------------------------------------------------------------------------------------------------------------------------------------------------------------------------------------------------------------------------------------------------------------------------------------------------------------------------------------------------------------------------------------------------------------------------------------------------------------------------------------------------------------------------------------------------------------------------------------------------------------------------------------------------------------------------------------------------------------------------------------------------------------------------------------------------------------------------------------------------------------------------------------------------------------------------------------------------------------------------------------------|
|       |                    | miR-27a-3p, miR-181b-2-3p, miR-26b-3p, miR-665, miR-548w, miR-103a-3p, miR-103, miR-503-5p, miR-539-5p, miR-134-3p, novel_23, miR-7b-5p, miR-223-3p, miR-329-3p, miR-19b-2-5p, miR-27b-3p, miR-497-5p, miR-26a-2-3p, miR-219a-1-3p, miR-450b-5p, miR-362-3p, miR-16b, miR-2284ab, miR-23a-3p, miR-424-5p, miR-432-3p, miR-16b, miR-182-5p, miR-505, miR-362-3p, miR-326, miR-199a-3p, miR-503-5p, miR-7-5p, miR-224-5p, miR-487b-5p, miR-378a-5p, miR-20a-3p, miR-181b-3p, miR-27a-3p, miR-203-3p, miR-677, miR-378g, miR-146b-3p, miR-216a-3p, miR-150-5p, miR-135b-5p, miR-195a-5p, miR-9851-3p, miR-19a-3p, miR-107, miR-96-5p, miR-885-5p, miR-2447, miR-326-3p, miR-16a, miR-15a, miR-3964, miR-22-5p, miR-499a-5p, miR-6517, miR-199a-3p, miR-1271-5p, miR-23c, miR-15a-5p, miR-322-5p, miR-302a-5p, miR-23b-3p, miR-505-5p, miR-330-5p, miR-218-2-3p, miR-3578, miR-362-3p, miR-2366, miR-128-3p, miR-19b-3p, miR-503-5p, miR-29a-5p, miR-181b-1-3p, miR-3071-3p, novel_17, miR-196a-3p, miR-543-5p, miR-30b-3p, miR-107, miR-182-5p, miR-15b-5p, miR-204-3p, miR-3959-5p, miR-3154, miR-23b, miR-137-3p, miR-21a-3p, miR-299, miR-329a, miR-1271, miR-16-5p, miR-145-3p, miR-224-5p, miR-665, miR-135a-5p, miR-3432a, miR-424-5p, miR-6516-3p, miR-487b-5p |
| NF1   | ENSOARGO(neurofib) | miR-1306-5p, miR-503-5p, miR-16b, miR-103a-2-5p, miR-1343-5p, miR-424-5p, miR-1388-3p, miR-628-5p, miR-382, miR-345-5p, miR-1434-3p, miR-296-5p, miR-873a-5p, miR-30b-3p, miR-197-3p, miR-450b-5p, miR-16b, miR-30b-3p, miR-21b, miR-16-2-3p, miR-497-5p, miR-2300a-5p, miR-185-5p, miR-503-5p, miR-9788-3p, miR-15a, miR-107-5p, miR-2285y, miR-16a, miR-502b, miR-2284q, miR-3059-5p, miR-9-3p, miR-18a-3p, miR-1306, miR-504, miR-450b-3p, miR-9-3p, miR-544-5p, miR-195a-5p, miR-2319a, miR-3074-5p, miR-320b, novel_17, miR-200c, miR-324-3p, miR-200c-3p, novel_127, miR-21-3p, miR-2484, miR-503-5p, miR-29b-2-5p, miR-490-3p, miR-1343-5p, miR-200b-3p, miR-429-3p, miR-18a-3p, miR-2285ad, miR-15a-5p, miR-200b, miR-222-5p, miR-6516-5p, miR-322-5p, miR-24-2-5p, miR-135a-1-3p, miR-3969, miR-664a-5p, miR-320e, miR-6516-3p, miR-129-5p, miR-31-3p, miR-424-5p, miR-3074-5p, miR-3184-3p, miR-16-5p, miR-3154, miR-27b-5p, miR-598-3p, miR-345-5p, miR-345-5p, miR-1827, miR-1248, miR-186-5p, miR-3074-1-3p, miR-874-3p, miR-504-5p, miR-598-3p, miR-6516, miR-15b-5p                                                                                                                                                                                 |
| SCD   | ENSOARGO(acyl-CoA) | miR-3955-3p, miR-17-3p, miR-17-3p, miR-493-3p, miR-378d, miR-23a-5p, miR-4492, novel_63, miR-488-3p, miR-4443, miR-2300a-5p, miR-17-3p, miR-2285aa                                                                                                                                                                                                                                                                                                                                                                                                                                                                                                                                                                                                                                                                                                                                                                                                                                                                                                                                                                                                                                                                                                                 |
| H2AFY | ENSOARGO(H2A hist) | miR-143-3p, miR-377-3p, miR-342-3p, miR-4726-5p, miR-362-3p, miR-329a, miR-362-3p, miR-217-5p, miR-217, miR-329-3p, miR-342, miR-362-3p, miR-377-3p                                                                                                                                                                                                                                                                                                                                                                                                                                                                                                                                                                                                                                                                                                                                                                                                                                                                                                                                                                                                                                                                                                                |
| YIPF6 | ENSOARGO(Yip1 dom) |                                                                                                                                                                                                                                                                                                                                                                                                                                                                                                                                                                                                                                                                                                                                                                                                                                                                                                                                                                                                                                                                                                                                                                                                                                                                    |



miR-490-3p, miR-1957a, miR-181a-2-3p, miR-1, miR-495-5p, miR-2385-3p, miR-29b-2-5p, miR-3529-3p, miR-181b-5p, miR-450a-2-3p, miR-17-3p, miR-2898, miR-378h, miR-1271-5p, miR-2411-5p, miR-128-3p, miR-378c, miR-365a-5p, miR-145-3p, miR-133a-3p, miR-1306-5p, miR-486b-3p, miR-3969, miR-331-3p, miR-410-5p, miR-154b-5p, miR-769, miR-365a-3p, miR-374c-3p, miR-34c-5p, miR-615-5p, miR-215-5p, miR-671-5p, miR-1814c, miR-362-5p, miR-3154, miR-296-3p, miR-363-5p, miR-660, miR-125a-5p, miR-503-5p, miR-2355-3p, miR-503-5p, miR-2285g, miR-2889, miR-30b-3p, miR-181a-5p, miR-1285, miR-449a, miR-371b-3p, miR-24-3p, miR-17-3p, miR-495-3p, miR-135a-2-3p, miR-147-5p, miR-199c, miR-128-1-5p, miR-34c, miR-6402, miR-34b, miR-323a-5p, miR-2404, miR-655-5p, miR-379-5p, miR-9851-3p, miR-18a-3p, miR-2411, miR-29b-1-5p, miR-183-5p, miR-216c-5p, miR-34b-5p, miR-30b-3p, miR-466i-5p, miR-125b, miR-196a-3p, miR-199a-3p, miR-222-5p, miR-505-3p, miR-378d, miR-5703, miR-2904, miR-215-5p, miR-2300b-3p, novel\_133, miR-206-3p, miR-425-5p, miR-1271, miR-145a-3p, miR-378c, miR-6516-3p, miR-664a, miR-17-3p, miR-29b-2-5p, miR-323-5p, miR-139-5p, miR-27a-5p, miR-192-5p, miR-532-5p, miR-660-5p, miR-378a-3p, miR-133b-3p, miR-21a-3p, miR-1839-3p, miR-382-3p, miR-494-3p, novel\_103, miR-5126, miR-2285e, miR-500-5p, miR-222-5p, miR-27a-3p, miR-2300a-5p, miR-2284aa, miR-450b-5p, miR-378c, miR-125b-2-3p, miR-30b-3p, miR-378b, miR-296-5p, miR-219a-2-3p, miR-154a, miR-362-5p, miR-452-5p, miR-181d-5p, miR-3059-5p, novel\_60, miR-2284q, miR-4726-5p, miR-371a-5p, miR-769-5p, miR-2285y, miR-2285n, miR-27a-3p, miR-3082-5p, miR-7857-3p, miR-378e, miR-499b-5p, novel\_94, miR-877-3p, miR-129b-5p, novel\_39, miR-450b-5p, novel\_127, miR-28-3p, miR-125a-3p, miR-219-3p, miR-205-5p, novel\_121, miR-2284z, miR-2285ad, miR-28a-3p, novel\_9, miR-125b-5p, miR-494-5p, miR-

miR-2331-3p, miR-552-3p, miR-6130, miR-6516, miR-377-3p, miR-151b, novel\_32, miR-22-3p, miR-21a-3p, miR-145a-3p, miR-4510, miR-2330-3p, miR-3958-5p, miR-206-3p, miR-3184-5p, miR-30e-3p, miR-2285j, miR-29b-2-5p, miR-30a-3p, miR-664a, miR-4492, miR-874-5p, miR-129-5p, miR-18a-3p, miR-30d-3p, miR-3600, miR-222-5p, novel\_83, miR-199a-3p, miR-532-3p, miR-151-5p, miR-2366, miR-191, miR-5703, miR-217-5p, miR-140-3p, miR-124-3p, miR-2904, miR-19b-3p, miR-142-3p, miR-378d, miR-34a-5p, miR-133a-3p, miR-181b-1-3p, miR-146a-5p, miR-486-3p, miR-2424, novel\_17, miR-26a-5p, miR-210-5p, miR-125b, miR-760-3p, miR-299-3p, miR-34b-5p, miR-20a-3p, miR-7977, miR-2285u, miR-3082-5p, miR-199b-5p, miR-361-3p, miR-544-5p, miR-3956-3p, miR-541-3p, novel\_60, miR-423-5p, miR-301a-5p, miR-450a-5p, miR-1343-3p, miR-2300a-5p, miR-145b, miR-181b-2-3p, miR-147a, miR-301b-5p, miR-541, miR-2284r, miR-484, miR-125b-2-3p, miR-30b-3p, miR-1a-3p, miR-450b-5p, miR-2426, miR-3120-5p, miR-2330-5p, miR-124a, miR-744-3p, miR-326, miR-1306-5p, miR-199a-3p, miR-3955-3p, miR-491-5p, miR-199b-5p, miR-146b, miR-1271, miR-125a, miR-141-3p, miR-615-5p, miR-370-3p, miR-2355-5p, miR-3959-5p, miR-365a-3p, miR-34c-5p, miR-324-5p, miR-199a-5p, miR-2448-3p, miR-3154, miR-876-3p, miR-1248, miR-671-5p, miR-2284v, miR-193a-5p, miR-1260b, miR-125b-5p, miR-331-3p, miR-138-5p, miR-191-5p, miR-486b-3p, miR-299a-3p, miR-6516-5p, miR-505-5p, miR-330-5p, miR-7134-5p, miR-4286, miR-181a-2-3p, miR-30a-3p, miR-1, miR-2385-3p, miR-29b-2-5p, miR-450c-5p, miR-490-3p, novel\_39, miR-199a-5p, miR-29a-5p, miR-1260a, miR-217, miR-30f, miR-127-5p, miR-2898, novel\_127, novel\_96, miR-200a-3p, miR-107, novel\_68, miR-26b-5p, miR-320b, miR-299b-3p, novel\_69, miR-34b, miR-2404, miR-181b-3p, miR-669, miR-677, miR-18a-3p, miR-150-5p, miR-1306, miR-107, miR-19a-3p, miR-410-5p, miR-1291, miR-

novel\_82, miR-499a-5p, miR-628-3p, miR-3968, miR-2447, miR-6527, miR-9-5p, miR-361-3p, novel\_111, miR-7705, miR-1306-3p, miR-96-5p, miR-668-5p, miR-1983, miR-24-1-5p, miR-378g, miR-4443, miR-431-5p, miR-199b-5p, miR-214-3p, miR-101b-3p, miR-8485, miR-2310, miR-329-3p, miR-541, miR-362-3p, miR-548w, miR-1343-3p, miR-145b, miR-1298-3p, miR-147a, miR-455-3p, miR-148b-5p, miR-421, novel\_74, miR-487b-5p, miR-874-5p, miR-4492, miR-130b-5p, miR-129-2-3p, miR-214, miR-6525, miR-450a-1-3p, miR-411, miR-433-3p, miR-655, miR-487b-5p, miR-339b, miR-543-3p, miR-1827, miR-548o-3p, miR-216b-3p, miR-376e-3p, miR-216b-5p, miR-2285p, miR-503-5p, miR-142a-3p, miR-376c-3p, miR-486-3p, miR-193b-5p, miR-33b-3p, miR-664-5p, miR-218-1-3p, miR-361-5p, miR-34a-5p, miR-18a-3p, miR-2284h-5p, miR-328-3p, miR-4324, miR-28c, novel\_87, miR-6119-3p, miR-379-3p, miR-29a, miR-376a-3p, miR-335-5p, miR-29c-3p, miR-2284w, miR-199b-5p, miR-148a-3p, miR-412-3p, novel\_68, miR-3120-3p, miR-374c-3p, novel\_69, miR-299b-3p, miR-6535, miR-669, miR-320c, miR-365b-5p, novel\_51, miR-380-5p, miR-668-3p, miR-432-3p, miR-2285r, miR-2284l, let-7a-2-3p, miR-1843b-5p, miR-223-3p, miR-450c-3p, miR-197-3p, miR-369-5p, miR-31-5p, miR-3955-5p, miR-339-5p, miR-134-3p, miR-411-5p, miR-194-3p, novel\_63, miR-494-5p, miR-125b-5p, miR-6740-5p, miR-1197-3p, miR-1260b, miR-301, miR-137-3p, miR-876-3p, miR-767, miR-329a, miR-2318, miR-1248, miR-574-5p, miR-874-3p, miR-2355-5p, miR-125a, miR-300-3p, miR-133c, miR-376c-3p, miR-664-3p, miR-6536, miR-127-5p, novel\_127, miR-152-3p, miR-3064-5p, miR-148b-5p, miR-450b-5p, miR-29a-5p, miR-330-5p, miR-23b-5p, miR-155-5p, miR-299a-3p, miR-2285ad, miR-6517, novel\_79, miR-18b-5p, miR-431, miR-9-5p, miR-758-5p, miR-450a-1-3p, miR-129-1-3p, miR-335, miR-2284q, miR-541-3p, miR-2285f, miR-219a-5p, miR-100h-5p, miR-664b, miR-3064-5p, miR-23b-3p, miR-322-5p, miR-15a-5p, miR-23c, miR-616-3p, miR-19b-3p, miR-300, let-7a-2-3p, miR-29d-3p, miR-124-3p, miR-217-5p, miR-188-3p, miR-450b-5p, miR-125b-2-3p, miR-181b-1-3p, miR-142a-3p, miR-130a-5p, miR-192-3p, miR-466i-5p, miR-760-3p, miR-2285af, miR-216a-5p, miR-500a-5p, miR-219b-5p, miR-217, miR-377-3p, miR-365a-3p, miR-15b-5p, miR-140-5p, miR-21-3p, miR-133b-3p, miR-876-3p, let-7g-3p, miR-381-3p, miR-200a-5p, miR-23b, miR-323-3p, miR-374a-3p, miR-10b-3p, miR-16-5p, miR-133a-3p, miR-424-5p, miR-374b-3p, miR-2285j, miR-29b-3p, miR-100-3p, miR-142-3p, miR-147a, novel\_78, miR-181b-2-3p, miR-29b, miR-16b, miR-299a-5p, miR-497-5p, miR-484, miR-301b-5p, miR-3071-5p, miR-8485, let-7a-2-3p, miR-124a, miR-493-5p, miR-424-5p, miR-101b-3p, miR-23a-3p, miR-652-5p, miR-342, miR-377-3p, miR-5126, miR-16b, miR-3596, miR-29a-3p, miR-677, miR-181b-3p, miR-499b-5p, miR-19a-3p, miR-493-5p, miR-195a-5p, miR-3591-3p, novel\_111, miR-323c, miR-1285-5p, miR-135a-2-3p, miR-342-3p, miR-212-3p, miR-2285x, miR-29c-3p, miR-495-3p, miR-499a-5p, miR-29a, miR-2284q, miR-15a, miR-2285n, miR-576-3p, miR-101-3p, miR-16a, miR-301a-5p

LSM14B ENSOARGO(LSM fami

SGK1 ENSOARGO( serum/g1

miR-194-3p, miR-16-1-3p, miR-16b, miR-27b-3p, miR-2284x, miR-188-5p, miR-497-5p, miR-542-3p, miR-432, miR-197-3p, miR-450c-3p, miR-432-3p, let-7a-2-3p, miR-493-5p, miR-6240, miR-380-5p, miR-378a-5p, miR-106b-3p, miR-296-3p, novel\_51, miR-105-5p, miR-299b-3p, novel\_69, miR-181b-3p, miR-669, miR-6535, miR-677, miR-144-3p, miR-3074-5p, miR-2319a, miR-148a-3p, miR-3065-5p, miR-216a-3p, miR-1306, miR-2285m, miR-29c-3p, miR-379-3p, miR-29a, miR-4324, miR-322-5p, miR-450a-1-3p, miR-429-3p, miR-299a-3p, miR-18b-5p, miR-1224-5p, miR-885-3p, miR-30c, miR-155-5p, miR-1343-5p, miR-2427, miR-200a, miR-3064-5p, miR-127-5p, miR-200a-3p, miR-152-3p, miR-8117, miR-503-3p, miR-125a, miR-1271, miR-329b, miR-329a, miR-876-3p, miR-767, miR-30e-5p, miR-1197-3p, miR-16-5p, miR-592, miR-125b-5p, miR-153, miR-421, miR-455-3p, miR-199b-3p, miR-330-3p, miR-181b-2-3p, miR-362-3p, miR-301b-5p, miR-541, miR-329-3p, miR-8485, miR-101b-3p, miR-487b-5p, miR-214-3p, miR-153-3p, miR-199a-3p, miR-16b, miR-29b-1-5p, miR-499a-3p, miR-2319b, miR-4792, miR-139-5p, miR-504, miR-493-5p, miR-409-5p, miR-381-3p, miR-378j, miR-877-3p, miR-423-5p, miR-2447, miR-190b-5p, miR-490-5p, novel\_82, miR-301a-5p, miR-7859, miR-212-5p, miR-184-3p, miR-33b-3p, miR-493-3p, miR-218-1-3p, miR-16-1-3p, miR-30c-5p, miR-98-3p, miR-377-5p, miR-181b-1-3p, miR-2285i, miR-486-3p, miR-345-3p, miR-30b, miR-122-3p, miR-499b-3p, miR-15b-5p, miR-548o-3p, miR-504-5p, miR-885-3p, miR-543-3p, miR-625-5p, miR-1895, miR-450a-1-3p, miR-299, miR-411, miR-30d-5p, miR-129b-3p, miR-98-3p, miR-224-5p, miR-769-5p, miR-181c-5p, miR-3184-5p, miR-3074-5p, miR-3184-3p, miR-433-5p, miR-214, miR-665-5p, miR-190a-5p, miR-874-5p, miR-2285j, miR-665, miR-432-5p, miR-2355-3p, miR-187-3p, miR-377-5p, miR-29b, miR-30b-3p, miR-21-5p, miR-181a-5p, miR-1434-3p, miR-654-3p, miR-296-3p, miR-363-5p, miR-125a-5p, miR-1243-3p, miR-216c-5p, miR-2285b, miR-30c-2-3p, miR-618, miR-299-3p, novel\_96, miR-28-3p, miR-6536, miR-196a-2-3p, miR-3600, miR-485-3p, miR-548e-3p, miR-299a-3p, miR-134-5p, miR-214-5p, miR-7859, miR-483-3p, miR-2904, miR-134, miR-2300b-3p, miR-493-3p, miR-425-5p, miR-665-5p, miR-28a-3p, miR-145a-3p, miR-6525, miR-1197-3p, miR-134-5p, miR-592, miR-6516-3p, miR-664a, miR-598-3p, miR-30c-1-3p, miR-204-3p, miR-582-5p, miR-331-5p, miR-139-5p, miR-137-3p, miR-598-3p, miR-2285c, miR-186-5p, novel\_99, miR-329b, miR-363-5p, miR-668-3p, miR-6240, miR-2330-5p, miR-30c-1-3p, miR-330-3p, miR-2331-5p, miR-103a-2-5p, miR-483-3p, miR-491-5p, miR-145b, miR-330-3p, miR-548w, miR-1343-3p, miR-2285e, miR-2285g, novel\_23, miR-145a-5p, miR-296-5p, miR-708-3p, miR-2284r, miR-541, miR-16-2-3p, miR-3120-5p, miR-219a-1-3p, miR-495-3p, miR-2447, miR-3059-5p, miR-541-3p, miR-374c-5p, miR-2284w, miR-877-3p, novel\_111, miR-107-5p, miR-2285t, miR-147-5p, miR-452-3p, miR-203-3p, miR-146b-3p, miR-374c-3p, miR-299b-3p, miR-3970, miR-378j, miR-3065-5p, miR-7975, miR-6516-3p

APLP2 ENSOARGO(amylloid

NDUFB6 ENSOARGO(NADH deh

OCRL

ENSOARGO(oculocer

miR-34a-5p, miR-193b-5p, miR-134, miR-2300b-3p, miR-1197-5p, miR-6516-5p, miR-483-3p, miR-134-5p, miR-299a-3p, miR-106a, miR-18b-5p, miR-106a, miR-34b-5p, miR-543-5p, miR-2484, miR-299-3p, miR-376b-3p, miR-196a-3p, miR-125a-3p, miR-8117, miR-324-3p, miR-30c-2-3p, miR-29b-1-5p, miR-376c-3p, miR-130a-5p, miR-20a, miR-3064-5p, miR-876-3p, miR-18a-5p, miR-20b-5p, miR-625-5p, miR-93-5p, miR-18a, miR-17-5p, miR-487b-5p, miR-433-3p, miR-544-3p, miR-2284s, miR-34c-5p, miR-6516, miR-6130, miR-3957, miR-140-5p, miR-3957-5p, miR-30c-1-3p, miR-2355-5p, miR-21-3p, miR-370-3p, miR-552-3p, miR-296-3p, miR-182-5p, miR-4492, miR-134-5p, novel\_63, miR-494-5p, miR-19b-1-5p, miR-665, miR-93, miR-122-5p, miR-145a-3p, miR-4510, miR-3958-5p, miR-30b-3p, miR-450b-5p, miR-544a, miR-2426, miR-219a-1-3p, miR-6239, miR-19b-2-5p, miR-432, miR-30b-3p, miR-432-5p, miR-134-3p, miR-376b-3p, miR-185-5p, miR-6238, miR-149-5p, miR-544b, miR-20b, novel\_78, miR-483-3p, miR-3085-3p, miR-466f-3p, miR-296-3p, novel\_103, miR-29b-1-5p, miR-105-5p, miR-182-5p, miR-17-5p, miR-106b-5p, miR-106a-5p, miR-30c-1-3p, miR-8485, miR-296-3p, miR-1388-3p, miR-106a-5p, miR-1291, miR-410-5p, miR-136-5p, miR-376a-3p, miR-361-3p, miR-18b, miR-150-5p, miR-376b-3p, miR-3591-3p, miR-378j, miR-378g, miR-34b, miR-299b-3p, miR-376d, miR-3064-5p, novel\_68, miR-452-3p, miR-218-5p, miR-20a-5p, miR-142b, miR-34c, miR-449a, miR-2428, miR-1296-5p, novel\_101

miR-212-5p, miR-191, miR-2366, miR-493-3p, miR-664-5p, miR-133a-3p, miR-2284u, miR-34a-5p, miR-503-5p, miR-345-3p, miR-181b-1-3p, miR-486-3p, miR-143-3p, novel\_17, miR-208b-3p, miR-210-5p, miR-324-3p, miR-2331-3p, miR-30c-1-3p, miR-216b-3p, miR-377-3p, miR-301a-3p, miR-15b-5p, miR-2285c, miR-129b-3p, miR-500a-3p, miR-1895, miR-625-5p, miR-129-2-3p, miR-3184-3p, miR-665-5p, miR-6525, miR-3604, miR-665, miR-454-3p, miR-500, miR-874-5p, miR-330-3p, miR-1343-3p, miR-548w, miR-181b-2-3p, miR-496-5p, miR-455-3p, miR-421, miR-329-3p, miR-541, miR-362-3p, miR-1839-5p, miR-1388-3p, miR-2284b, miR-8485, miR-431-5p, novel\_19, miR-505, miR-16b, miR-491-5p, miR-130b-3p, miR-2284g, miR-2319b, miR-7689-3p, miR-2285u, miR-3596, miR-181a-3p, miR-96-5p, miR-668-5p, miR-1983, miR-3956-3p, miR-2284j, novel\_111, novel\_82, miR-2440, miR-615, miR-499a-5p, miR-6517, miR-429-3p, miR-1224-5p, miR-431, miR-322-5p, miR-505-5p, miR-129-1-3p, miR-1343-5p, miR-330-5p, miR-2284y, novel\_39, miR-125a-3p, miR-127-5p, miR-152-3p, novel\_96, miR-200a-3p, miR-574-5p, miR-542-5p, miR-1271, miR-125a, miR-301, miR-329a, miR-2284v, miR-193a-5p, miR-16-5p, miR-1260b, miR-1197-3p, miR-181c-3p, miR-2284k, miR-2433, miR-125b-5p, miR-191-5p, miR-31-5p, miR-103a-3p, miR-412-5p, miR-149-5p, miR-542-3p, miR-7b-5p, miR-22-3p, novel\_23, miR-16b, miR-3432b, miR-497-5p, miR-4508, miR-2284x, miR-6240, miR-668-3p, miR-628-5p, miR-7-5p, miR-377-3p, miR-365b-5p, miR-3141, novel\_51, miR-194a, miR-106b-3p, miR-193a-3p, novel\_68, miR-216b-3p, novel\_69, miR-411b-3p, miR-669, miR-677, miR-181b-3p, miR-148a-3p, miR-3141, miR-1306, miR-216a-3p, miR-412-3p, miR-193b-3p, miR-29c-3p, miR-2285m, miR-301b-3p, miR-28c, miR-208a-3p, miR-29a, miR-6123, miR-3600, miR-200b, miR-148b-3p, miR-15a-5p, miR-532-3p, miR-362-3p, miR-215-5p, miR-290A, miR-1107-5p, miR-188-3p, miR-299b-3p, miR-7-1-3p, miR-216b-3p, miR-24-1-5p, miR-505-3p, miR-410-5p, miR-3065-5p, miR-199b-5p, miR-140-5p, miR-199b-5p, miR-877-3p, miR-199c, miR-374a-3p, novel\_87, miR-2355-3p, miR-216a-3p, miR-199b-3p, miR-133b-5p, miR-151a-3p, miR-125b-2-3p, miR-197-3p, miR-2310, miR-101-5p, miR-101b-3p, miR-199b-5p, miR-2411-3p, miR-199a-3p, miR-199a-5p, miR-99a-3p, miR-140-5p, miR-1814c, miR-3154, miR-299, miR-21a-3p, miR-374a-3p, miR-3958-5p, miR-129-2-3p, miR-539-5p, miR-590-3p, miR-6516-3p, miR-151-3p, miR-99b-3p, miR-129-1-3p, miR-199a-3p, miR-2411-5p, miR-200b, miR-24-2-5p, miR-505-3p, miR-423-3p, miR-299a-3p, miR-361-5p, miR-200b-3p, miR-33b-3p, miR-3591-5p, miR-345-3p, miR-1957a, miR-199a-5p, miR-2411, miR-24-2-5p, miR-369-3p, miR-3529-3p, miR-299-3p, miR-200c-3p, miR-99a-3p, miR-345-3p, miR-200c

ADD1 ENSOARGO(adducin

GLIPR1L2 ENSOARGO(GLI path,

miR-42b-5p, miR-3074-2-3p, miR-590-3p, miR-145a-3p, miR-3184-3p, miR-769-5p, miR-30a-3p, miR-320e, miR-3604, miR-30e-3p, miR-4492, miR-487a-5p, miR-708-5p, miR-129-5p, miR-130b-5p, novel\_74, miR-450b-3p, miR-6516-3p, miR-17-3p, miR-21-3p, miR-3065-3p, miR-216b-3p, miR-221-5p, miR-30c-1-3p, miR-32-5p, miR-504-5p, miR-548o-3p, miR-204-3p, miR-582-5p, miR-377-3p, miR-139-5p, miR-450a-1-3p, miR-543-3p, miR-186-5p, miR-582-5p, miR-133b-3p, let-7g-3p, miR-18a-5p, miR-183-5p, miR-329a-5p, miR-216c-5p, miR-29b-1-5p, miR-664b-3p, novel\_17, miR-3653-3p, miR-221-5p, miR-299-3p, miR-320d, miR-30d-3p, miR-199a-3p, miR-340-5p, miR-2904, miR-1197-5p, miR-140-3p, miR-5703, miR-1434-5p, miR-2300b-3p, miR-2366, miR-133a-3p, miR-16-1-3p, novel\_73, miR-4429, miR-2447, novel\_60, miR-363-3p, miR-3956-3p, miR-9-3p, miR-1285-5p, miR-371a-5p, miR-769-5p, miR-2285t, miR-499b-5p, miR-126b-5p, miR-211-5p, miR-139-5p, miR-2319b, miR-27a-3p, miR-378g, miR-25, miR-2483-3p, miR-3082-5p, miR-877-3p, miR-9-3p, miR-136-5p, miR-504, miR-376b, miR-652-5p, miR-101b-3p, miR-8485, miR-30c-1-3p, miR-29b-1-5p, miR-505, miR-323b-3p, miR-199a-3p, miR-320b, miR-342, miR-326, miR-27a-3p, miR-1343-3p, miR-455-3p, miR-9788-3p, miR-2459, miR-539-5p, miR-147a, miR-323b, miR-6529a, miR-2284aa, miR-16-2-3p, miR-101c, miR-1388-5p, miR-133a-3p, miR-1306-5p, miR-145-3p, miR-6740-5p, miR-144, miR-3969, miR-410-5p, miR-29b-3p, miR-410-3p, miR-3432a, miR-134-5p, miR-28-5p, miR-204-5p, miR-331-5p, miR-141-3p, miR-331-5p, miR-769, miR-25-3p, miR-137-3p, miR-3154, miR-18a, miR-320a, miR-381-3p, miR-2448-3p, miR-331-5p, let-7g-3p, miR-30a-3p, novel\_39, miR-3065-3p, miR-192-3p, miR-380-5p, miR-92b-3p, miR-450b-5p, miR-30c-2-3p, miR-200a-3p, miR-92a-3p, miR-17-3p, miR-127-5p, miR-18b-5p, miR-299a-3p, miR-134-5p, miR-450a-1-3p, miR-2284z, miR-758-

EIF3E      ENSOARGO(eukaryot

miR-422a, miR-125b, miR-299-3p, miR-34b-5p, miR-34b-3p, miR-2887, miR-183-5p, miR-486-3p, miR-140-3p, miR-378a-3p, miR-5703, miR-1193, miR-2904, miR-2366, miR-1246, miR-193b-5p, miR-378i, novel\_133, miR-34a-5p, miR-148a-5p, miR-664-5p, miR-184-3p, miR-142-3p, miR-19b-3p, miR-548e-3p, miR-3960, novel\_83, miR-222-5p, miR-7859, miR-219b-3p, miR-4492, miR-500, miR-17-3p, miR-665-5p, miR-3074-5p, miR-378c, miR-122-5p, miR-769-5p, miR-500a-3p, miR-27b-5p, let-7g-3p, miR-182-5p, miR-552-3p, miR-370-5p, miR-378a-3p, miR-139-5p, miR-6516, miR-182-5p, miR-199b-5p, miR-33a-5p, miR-744-3p, let-7c-3p, miR-101b-3p, miR-3187-3p, miR-378d, miR-30b-3p, miR-3962, miR-412-3p, miR-7857, miR-541, miR-484, miR-378b, miR-101c, miR-21b, miR-450b-5p, miR-101a-5p, miR-378c, miR-222-5p, miR-5010-3p, novel\_4, miR-148b-5p, miR-9788-3p, miR-1298-3p, miR-425-3p, miR-2285y, miR-769-5p, miR-101-3p, miR-2285n, miR-490-5p, miR-212-3p, miR-541-3p, miR-219a-2-3p, miR-361-3p, miR-877-3p, miR-199b-5p, miR-361-3p, miR-335-3p, miR-20a-3p, miR-452-3p, miR-139-5p, miR-489, miR-378g, miR-378e, miR-3071-3p, miR-125a-3p, miR-219-3p, miR-6119-5p, miR-1260a, miR-17-3p, miR-450a-2-3p, miR-2403, miR-181a-2-3p, miR-199a-5p, miR-148b-5p, miR-380-5p, miR-450b-5p, miR-196a-5p, let-7a-2-3p, miR-412, miR-2285ad, miR-299a-3p, novel\_121, miR-483-3p, miR-758-5p, miR-6516-5p, miR-378h, miR-144, miR-331-3p, miR-125b-5p, miR-370-5p, miR-410-5p, miR-486b-3p, miR-331-5p, miR-2284v, miR-378c, miR-1260b, miR-137-3p, miR-2448-3p, miR-331-5p, miR-671-5p, miR-615-5p, miR-125a, miR-2355-5p, miR-874-3p, miR-3957-5p, miR-3957, miR-199a-5p, miR-769, miR-331-5p, miR-34c-5p, miR-125a-5p, miR-483-3p, miR-124-5p, miR-196b-5p, miR-101-5p, miR-380-5p, let-7a-2-3p, let-7j, miR-197-3p, miR-432, miR-744-5p, miR-219a-1-3p, miR-1260h, miR-30b-3p, miR-665, miR-133b-5p, miR-144-5p, miR-376b-5p, miR-29a-5p, miR-376c-5p, miR-211, miR-432-3p, miR-216a-5p, miR-2285j, miR-210-5p, miR-377-3p, miR-22-5p, miR-202-5p, miR-3600, miR-211-5p, miR-144-5p, miR-412-5p, miR-377-3p, miR-2284s, miR-129b-5p, miR-376c-5p, miR-296-5p, miR-376b-5p, miR-335-3p, miR-376c-5p, miR-1983, miR-412-3p

RASGRF1 ENSOARGO(Ras prot

MTPAP ENSOARGO(mitochon



|        |                    |                                                                                                                                                                                                                                                                                                                                                                                                                                                                                                                                                                                                                                                 |
|--------|--------------------|-------------------------------------------------------------------------------------------------------------------------------------------------------------------------------------------------------------------------------------------------------------------------------------------------------------------------------------------------------------------------------------------------------------------------------------------------------------------------------------------------------------------------------------------------------------------------------------------------------------------------------------------------|
|        |                    | miR-6517, miR-2285ad, novel_79, miR-412, miR-378h, miR-6516-5p, miR-532-3p, miR-1961, miR-345-3p, miR-378i, miR-378a-3p, miR-1197-5p, miR-1343-5p, miR-2904, let-7d, miR-10a-5p, miR-29b-2-5p, miR-2284a, let-7g, miR-2284y, miR-2432, miR-542-5p, miR-1260a, miR-125b, miR-339a, miR-185-3p, let-7c-5p, miR-345-3p, miR-422a, miR-466i-5p, let-7f-5p, miR-98-5p, miR-2898, let-7k, miR-30b-3p, miR-221-5p, miR-660-5p, miR-221-5p, miR-2331-3p, miR-378a-3p, miR-504-5p, miR-125a, miR-6516, miR-10a, let-7i-5p, miR-129b-3p, miR-339b, miR-1827, miR-625-5p, miR-3074-5p, miR-145a-3p, miR-378c, let-7b, miR-                                 |
| SCARA3 | ENSOARGO scavenger | 214, miR-193a-5p, miR-224-5p, miR-1260b, miR-10b-5p, miR-378c, let-7b-5p, let-7f, miR-29b-2-5p, miR-125b-5p, miR-331-3p, miR-1343-3p, miR-339-5p, let-7g-5p, miR-185-5p, miR-194-3p, miR-1843b-5p, miR-10b, miR-541, miR-708-3p, miR-484, miR-378b, miR-412-3p, miR-1260b, miR-378c, let-7a-5p, miR-378d, miR-1306-5p, miR-224-5p, novel_51, miR-2411-3p, miR-214-3p, let-7e, miR-542-5p, miR-1343-5p, miR-125a-5p, miR-660, miR-3074-5p, miR-378b, miR-2284g, miR-10a-5p, novel_69, miR-3596, miR-378e, miR-4443, miR-6535, let-7d-5p, miR-1306, miR-504, miR-378f, let-7e-5p, miR-541-3p, miR-542-5p, let-7i, miR-2285y, miR-6123, miR-656-5p |
| ANXA5  | ENSOARGO annexin   | miR-421                                                                                                                                                                                                                                                                                                                                                                                                                                                                                                                                                                                                                                         |
|        |                    | miR-155-5p, miR-1343-5p, miR-200a-3p, miR-196a-3p, miR-377-3p, miR-29b-1-5p, miR-505, miR-217, miR-29b-2-5p, miR-29b-1-5p, miR-8485, miR-338-3p, miR-29b-2-5p, miR-218-1-3p, miR-155-5p, miR-1343-5p, miR-217-5p, miR-505-5p, miR-155-5p, miR-1b-3p, miR-141-3p                                                                                                                                                                                                                                                                                                                                                                                 |
| DHTKD1 | ENSOARGO dehydrog  |                                                                                                                                                                                                                                                                                                                                                                                                                                                                                                                                                                                                                                                 |

ESCO2 ENSOARGO(establis

novel\_115, miR-326, novel\_103, miR-320b, miR-199a-3p, miR-3955-3p, miR-130b-3p, miR-382-3p, miR-2330-5p, miR-744-3p, miR-30c-1-3p, miR-193a, miR-2284r, miR-1388-5p, miR-2284aa, miR-101c, miR-27a-3p, miR-421, miR-9788-3p, miR-216a-3p, miR-455-3p, miR-371a-5p, miR-7134-3p, miR-3059-5p, miR-2284j, miR-452-5p, miR-181d-5p, miR-7705, miR-8095, miR-504, miR-668-5p, miR-3963, miR-9-3p, miR-335-3p, miR-139-5p, miR-541-5p, miR-7857-3p, miR-27a-3p, miR-203-3p, miR-2284m, miR-320d, miR-21-3p, miR-2484, miR-3653-3p, miR-345-3p, miR-486-3p, miR-5703, miR-4429, miR-378d, let-7a-3p, miR-218-1-3p, miR-505-3p, miR-340-5p, miR-199a-3p, miR-320e, miR-3604, miR-6516-3p, miR-664a, novel\_74, miR-450b-3p, miR-130b-5p, miR-129-5p, miR-454-3p, miR-539-5p, miR-425-5p, miR-181c-5p, miR-450a-1-3p, miR-129b-3p, miR-582-5p, miR-625-5p, miR-30c-1-3p, miR-504-5p, miR-532-5p, miR-21-3p, miR-139-5p, miR-301a-3p, miR-582-5p, miR-877-5p, miR-466f-3p, miR-130b-5p, miR-432-3p, miR-2284l, miR-432-3p, miR-181a-5p, miR-1434-3p, miR-653, miR-3071-5p, miR-450c-3p, miR-219a-1-3p, miR-2284ab, miR-27b-3p, miR-2284x, miR-133b-5p, miR-3955-5p, miR-665, miR-130a-3p, miR-185-5p, miR-2284d, miR-142b, miR-576-3p, miR-147-5p, novel\_101, miR-301b-3p, miR-2284w, miR-2428, miR-326-3p, miR-3065-5p, miR-150-5p, miR-3970, miR-6516-3p, miR-505-3p, miR-7975, miR-378b, miR-320c, miR-30c-2-3p, miR-181b-5p, miR-127-5p, miR-490-3p, novel\_39, miR-134, miR-330-5p, miR-2284z, miR-134-5p, miR-582-3p, miR-450a-1-3p, miR-2284k, miR-100-3p, miR-486b-3p, miR-134-5p, miR-2284v, miR-323-3p, miR-320a, miR-3154, miR-2318, miR-10b-3p, miR-7144-5p, miR-331-5p

miR-186-5p, miR-625-5p, miR-339b, miR-450a-1-3p, miR-15b-5p, miR-216b-5p, miR-377-3p, miR-296-3p, miR-216b-3p, miR-1277-3p, miR-190a-5p, miR-129-5p, miR-487b-5p, miR-3604, miR-2285j, miR-181c-5p, miR-122-5p, miR-3184-5p, miR-6525, miR-3958-5p, miR-3074-5p, miR-590-3p, miR-361-5p, miR-34a-5p, miR-148a-5p, miR-133a-3p, miR-33b-3p, miR-1434-5p, miR-378a-3p, miR-378i, miR-23c, miR-23b-3p, miR-210-3p, miR-7859, miR-345-3p, miR-422a, miR-92a-1-5p, miR-210-5p, miR-664b-3p, miR-421-5p, miR-345-3p, miR-195a-3p, miR-329a-5p, miR-335-3p, miR-136-5p, miR-668-5p, miR-96-5p, miR-140-5p, miR-4443, miR-203-3p, miR-2483-3p, miR-378g, miR-25, miR-211-5p, miR-2319b, miR-301a-5p, miR-101-3p, miR-7705, miR-423-5p, miR-190b-5p, miR-101c, miR-21b, miR-362-3p, miR-1388-5p, miR-1a-3p, miR-323b, miR-541, miR-301b-5p, miR-329-3p, miR-2284r, miR-421, miR-148b-5p, miR-147a, miR-145b, miR-1343-3p, miR-103a-2-5p, miR-146b, miR-487b-5p, miR-16b, miR-323b-3p, miR-505, miR-2310, miR-8485, miR-378d, miR-23a-3p, miR-101b-3p, miR-1248, miR-329a, miR-2318, miR-767, miR-23b, miR-376c-5p, miR-200a-5p, miR-301, miR-1271, miR-2285aa, miR-3068-3p, miR-6740-5p, miR-100-3p, miR-1260b, miR-1197-3p, miR-16-5p, miR-155-5p, miR-23b-5p, miR-2427, novel\_121, miR-450a-1-3p, miR-322-5p, miR-18b-5p, novel\_79, miR-429-3p, miR-2285ad, miR-299a-3p, miR-127-5p, miR-8117, miR-450c-5p, miR-192-3p, miR-2285b, miR-29a-5p, miR-200a, miR-450b-5p, miR-378f, miR-146b-5p, miR-410-5p, miR-3065-5p, miR-1306, miR-376b-5p, miR-144-3p, miR-411b-3p, miR-299b-3p, miR-3120-3p, miR-216b-3p, miR-3074-5p, miR-329-5p, miR-6123, miR-206, miR-379-3p, miR-29a, miR-6119-3p, miR-576-3p, miR-2284w, miR-29c-3p, miR-193b-3p, miR-497-5p, miR-16-1-3p, miR-16b, miR-450c-3p, miR-542-3p, miR-2113, miR-19b-2-5p, miR-194-3p, novel\_116, miR-3431, miR-134-3p, miR-3535, miR-412-5p, miR-320-5p, miR-103a-

miR-17-3p, miR-2285x, miR-1a-1-5p, miR-199b-5p, miR-211, miR-24-3p, miR-485-3p, miR-16a, miR-15a, miR-28c, miR-133a-5p, miR-142b, miR-20a-5p, miR-576-3p, miR-6119-3p, miR-206, miR-3074-5p, miR-329-5p, miR-411b-3p, miR-299b-3p, miR-2285ab, miR-376b-5p, miR-18b, miR-376a-2-5p, miR-505-3p, miR-195a-5p, miR-107, miR-2483-5p, miR-382, miR-628-5p, let-7a-2-3p, miR-455-5p, miR-106a-5p, miR-2411-3p, miR-17-5p, miR-224-5p, miR-665, miR-26b-3p, miR-187-3p, miR-3955-5p, miR-103a-3p, miR-103, miR-2355-3p, miR-20b, miR-450c-3p, miR-3071-5p, miR-497-5p, miR-26a-2-3p, miR-455-5p, miR-27b-3p, miR-16b, miR-380-3p, miR-1260b, miR-16-1-3p, miR-3607-3p, miR-16-5p, miR-145-3p, miR-93, miR-1260b, miR-6740-5p, miR-1-5p, miR-410-5p, miR-494-5p, miR-5100, miR-204-5p, miR-28-5p, novel\_9, miR-2355-5p, miR-874-3p, miR-199a-5p, miR-3965, miR-769, miR-137-3p, miR-93-5p, miR-376c-5p, miR-18a, miR-3154, miR-17-5p, miR-30e-5p, miR-503-3p, miR-376c-5p, miR-7144-5p, miR-20b-5p, miR-671-5p, miR-1814c, miR-1248, miR-2318, miR-329a, let-7g-3p, miR-329b, miR-30a-3p, miR-1, miR-4286, miR-29a-5p, miR-199a-5p, miR-192-3p, miR-1271-3p, miR-2478, miR-28b, miR-30c-2-3p, miR-30f, miR-3071-3p, miR-1260a, miR-2285af, miR-200c, miR-219-3p, miR-8117, miR-6119-5p, miR-107, miR-17-3p, miR-450a-2-3p, miR-200c-3p, miR-1a-2-5p, miR-7641, miR-412, miR-431, miR-376a-5p, miR-18b-5p, miR-299a-3p, miR-2285ad, miR-429-3p, miR-450a-1-3p, miR-486-5p, miR-302a-5p, miR-322-5p, miR-6516-5p, miR-758-5p, miR-30a-5p, miR-345-3p, miR-200b-3p, let-7a-2-3p, miR-2285f, miR-3059-5p, miR-885-5p, miR-219a-2-3p, miR-7705, novel\_111, miR-2285y, miR-769-5p, miR-2285n, miR-30b-5p, miR-2440, miR-2285u, miR-211-5p, miR-10b, miR-20a-3p, miR-203-3p, miR-27a-3p, miR-499a-3p, miR-2483-3p, miR-129b-5p, miR-381-3p, miR-361-3p, miR-140-5p, miR-100b-5p, miR-335-3p, novel\_94, let-7c-3p, miR-33a-3p, miR-486b-3p, miR-125b-5p, miR-122-5p, miR-6134, miR-1271, miR-133a-3p, miR-133b-3p, miR-2284s, miR-34c-5p, novel\_32, miR-574-5p, miR-3065-3p, miR-296-3p, miR-125a, miR-2898, miR-450a-2-3p, miR-34b-5p, miR-21-3p, miR-543-5p, novel\_127, miR-196a-3p, miR-324-3p, miR-125b, miR-185-3p, miR-92a-1-5p, novel\_39, miR-3065-3p, miR-486-3p, miR-34a-5p, miR-1343-5p, miR-483-3p, miR-1271-5p, miR-18a-3p, miR-212-5p, miR-6123, novel\_82, miR-34c, miR-301a-5p, miR-24-3p, miR-371b-3p, miR-449a, miR-541-3p, miR-147-3p, miR-96-5p, miR-1291, miR-3141, miR-18a-3p, miR-411b-3p, novel\_69, miR-34b, miR-6535, miR-452-3p, miR-7689-3p, miR-320b, miR-483-3p, miR-1343-5p, miR-125a-5p, novel\_19, miR-3141, miR-4532, miR-432, miR-301b-5p, miR-1843b-5p, miR-541, miR-432-5p

PBK

ENSOARGO(PDZ bind

OGDH

ENSOARGO(oxogluta:

|      |                   |                                                                                                                                                                                                                                                                                                                                                                                                                                                                                                                                                                                                                                                                                                                                                                                                                                                                                                                                                                                                                                                                                                                                                                                                                                                                                                                                                                                                                                                                                                                                                                                                                                                                                                                                                                                                                                                                                                                                          |
|------|-------------------|------------------------------------------------------------------------------------------------------------------------------------------------------------------------------------------------------------------------------------------------------------------------------------------------------------------------------------------------------------------------------------------------------------------------------------------------------------------------------------------------------------------------------------------------------------------------------------------------------------------------------------------------------------------------------------------------------------------------------------------------------------------------------------------------------------------------------------------------------------------------------------------------------------------------------------------------------------------------------------------------------------------------------------------------------------------------------------------------------------------------------------------------------------------------------------------------------------------------------------------------------------------------------------------------------------------------------------------------------------------------------------------------------------------------------------------------------------------------------------------------------------------------------------------------------------------------------------------------------------------------------------------------------------------------------------------------------------------------------------------------------------------------------------------------------------------------------------------------------------------------------------------------------------------------------------------|
| FAS  | ENSOARGO(Fas cell | miR-2387, let-7e-5p, miR-19a-3p, miR-20a-3p, let-7d-5p, let-7i, miR-2285n, miR-4324, miR-382-3p, miR-6123, miR-374a-3p, miR-628-3p, miR-219a-5p, miR-9-5p, miR-181d-5p, miR-181a-5p, miR-2113, miR-4791, miR-708-3p, miR-2284aa, miR-1839-5p, miR-101a-5p, miR-409b, miR-31-5p, let-7g-5p, miR-3535, novel_103, miR-466f-3p, let-7e, miR-1185-5p, miR-124-5p, miR-2483-5p, miR-382-3p, let-7a-5p, miR-503-3p, miR-488-3p, miR-1827, miR-216b-3p, let-7i-5p, miR-216b-5p, let-7f, miR-15b-3p, miR-374b-3p, let-7b, miR-181c-5p, miR-338-3p, let-7b-5p, miR-374a-3p, miR-6525, miR-1961, miR-218-1-3p, let-7d, miR-142-3p, miR-19b-3p, miR-582-3p, miR-7641, novel_121, miR-2284z, miR-9-5p, let-7c-5p, miR-196a-3p, miR-543-5p, let-7k, let-7f-5p, miR-181b-5p, miR-98-5p, miR-345-3p, miR-216c-5p, miR-143-3p, miR-2424, let-7g, miR-376c-5p                                                                                                                                                                                                                                                                                                                                                                                                                                                                                                                                                                                                                                                                                                                                                                                                                                                                                                                                                                                                                                                                                             |
| MSH3 | ENSOARGO(mutS hom | miR-133c, miR-377-3p, miR-382, miR-377-3p, let-7j, miR-432-3p, miR-668-3p, miR-628-5p, miR-3141, miR-32, miR-105-5p, novel_51, miR-412-5p, miR-134-3p, miR-339-5p, miR-497-5p, miR-27b-3p, miR-16b, miR-197-3p, miR-22-3p, miR-431-3p, miR-432, miR-1843b-5p, miR-199b-5p, miR-6123, miR-206, miR-2284o, miR-6535, miR-669, miR-3120-3p, novel_68, miR-3074-5p, miR-2284e, miR-1306, miR-216a-3p, miR-3141, novel_39, miR-92b-3p, miR-148b-5p, miR-3064-5p, miR-2284f, novel_96, miR-127-5p, miR-8117, miR-125a-3p, miR-486-5p, miR-322-5p, miR-412, novel_79, miR-1224-5p, miR-429-3p, miR-885-3p, miR-1343-5p, miR-330-5p, miR-181c-3p, miR-1260b, miR-1197-3p, miR-16-5p, miR-3432a, miR-592, novel_9, miR-6740-5p, miR-2433, miR-25-3p, miR-574-5p, miR-874-3p, miR-876-3p, miR-345-5p, miR-744-3p, miR-1388-3p, miR-124a, miR-101b-3p, miR-127-3p, miR-199b-5p, miR-214-3p, miR-491-5p, miR-323b-3p, miR-29b-1-5p, miR-16b, miR-199a-3p, miR-148b-5p, miR-455-3p, miR-1343-3p, miR-199b-3p, miR-1a-3p, miR-323b, miR-501-3p, miR-2284r, miR-541, miR-301b-5p, miR-423-5p, miR-877-3p, miR-361-3p, miR-3956-3p, miR-363-3p, miR-154-3p, miR-301a-5p, miR-2440, miR-4443, miR-500-3p, miR-25, miR-378g, miR-181a-3p, miR-504, miR-486-3p, miR-376a-5p, miR-195a-3p, miR-487a, miR-324-3p, novel_17, miR-210-5p, miR-328-3p, miR-212-5p, miR-133a-3p, miR-148a-5p, miR-34a-5p, miR-3184-5p, miR-181c-5p, miR-769-5p, miR-346, miR-665-5p, miR-214, miR-3074-5p, miR-874-5p, miR-4492, miR-151b, miR-15b-5p, miR-2284s, miR-582-5p, miR-154a-3p, miR-552-3p, miR-2331-3p, miR-504-5p, miR-32-5p, miR-30c-1-3p, miR-885-3p, miR-625-5p, miR-1895, miR-543-3p, miR-1827, miR-339b, miR-345-5p, miR-129b-3p, miR-345-5p, miR-654-3p, miR-363-5p, miR-1343-5p, miR-466f-3p, miR-2355-3p, miR-432-5p, miR-187-3p, miR-133b-5p, miR-7862, miR-30b-3p, miR-138, miR-1260b, miR-873a-5p, miR-181a-5p, miR-326-3p, miR-449a, miR-2428, miR-3957- |
| CHKA | ENSOARGO(choline  |                                                                                                                                                                                                                                                                                                                                                                                                                                                                                                                                                                                                                                                                                                                                                                                                                                                                                                                                                                                                                                                                                                                                                                                                                                                                                                                                                                                                                                                                                                                                                                                                                                                                                                                                                                                                                                                                                                                                          |

miR-2404, miR-411b-3p, miR-34b, miR-7689-3p, miR-320b, miR-3074-5p, miR-6395, miR-1291, miR-216a-3p, miR-361-3p, miR-449a, novel\_27, miR-7705, miR-3959-3p, miR-495-3p, miR-1193, miR-34c, miR-107-5p, miR-218-5p, miR-2459, miR-185-5p, novel\_78, miR-1343-3p, miR-133b-5p, miR-450c-3p, miR-873a-5p, miR-542-3p, miR-1843b-5p, miR-223-3p, miR-296-3p, miR-432-3p, miR-432-3p, miR-668-3p, miR-125a-5p, miR-103a-2-5p, miR-483-3p, miR-3955-3p, miR-136-3p, miR-296-3p, miR-2284s, miR-34c-5p, miR-216b-3p, miR-370-5p, miR-552-3p, miR-296-3p, miR-125a, miR-7144-5p, miR-671-5p, novel\_99, miR-1827, miR-485-5p, miR-329b, miR-299, miR-450a-1-3p, miR-338-3p, miR-665-5p, miR-3074-5p, miR-4492, miR-450b-3p, miR-664a, miR-125b-5p, miR-6740-5p, miR-370-5p, novel\_83, miR-545-5p, miR-450a-1-3p, miR-328-3p, miR-483-3p, miR-128-3p, miR-664-5p, miR-34a-5p, miR-23b-5p, miR-1957a, miR-30b-3p, miR-34b-5p, miR-202-5p, miR-219b-5p, miR-125b, miR-3963, miR-181a-3p, miR-136-5p, miR-493-5p, miR-221, miR-199b-5p, miR-129b-5p, miR-3596, miR-2483-3p, miR-144-5p, miR-27a-3p, miR-1185-2-3p, miR-2284g, miR-664b, miR-452-3p, miR-2319b, miR-2285u, miR-541-5p, miR-4726-5p, miR-3964, miR-2284q, miR-2285n, miR-382-3p, miR-101-3p, miR-2285y, miR-8095, miR-1285-5p, miR-219a-2-3p, miR-154a, miR-2447, miR-32-3p, miR-3059-5p, miR-212-3p, miR-6527, miR-181d-5p, miR-194b-5p, miR-2284j, miR-452-5p, miR-362-3p, miR-484, miR-329-3p, miR-7857, miR-142-5p, miR-539-5p, miR-147a, miR-221-3p, miR-455-3p, miR-2285e, miR-1185-3p, miR-330-3p, miR-1343-3p, miR-145b, miR-181b-2-3p, miR-27a-3p, miR-1185-5p, miR-199b-5p, miR-362-3p, miR-2310, miR-1b-5p, miR-124a, miR-1388-3p, let-7c-3p, miR-2284b, let-7g-3p, miR-133b-3p, miR-543-3p, miR-582-5p, miR-21a-3p, miR-2285c, miR-411, miR-433-3p, miR-582-5p, miR-377-3p, miR-204-3p, miR-877-5p, miR-32-3p, miR-548o-3p, miR-32-3p, miR-216b-3p, miR-155-5p, miR-6516-3p, miR-17-3p, miR-487b-5p, miR-222-3p, miR-219b-3p, miR-19b-1-5p, miR-3604, miR-142a-5p, miR-181c-5p, miR-539-5p, miR-425-5p, miR-3074-2-3p, novel\_73, miR-133a-3p, miR-218-1-3p, miR-2284u, miR-2300b-3p, miR-362-3p, miR-2408, miR-124-3p, miR-1434-5p, miR-7859, miR-548e-3p, miR-3600, miR-30d-3p, miR-2284m, miR-1277-5p, miR-3653-3p, miR-2285p, miR-216a-5p, miR-181b-1-3p, miR-329a-5p, miR-216c-5p, miR-183-5p, miR-450b-3p, miR-2284e, miR-6516-3p, miR-3065-5p, miR-374c-3p, miR-677, miR-181b-3p, novel\_68, miR-329-5p, miR-3120-3p, miR-92a-3p, novel\_1, miR-421-5p, miR-142b, miR-6402, miR-485-3p, miR-382-5p, miR-323c, miR-3959-3p, miR-199b-5p, miR-17-3p, miR-495-3p, miR-2285x, miR-2284ab, miR-26a-2-3p, miR-27b-3p, miR-19b-2-5p, miR-653, miR-1285, miR-2113, miR-181a-5p, miR-194-5p, miR-145a-5p, miR-2285g, novel\_116, miR-377-3p, miR-32, miR-330-3p, miR-503-3p, miR-493-5p, miR-6240, let-7f-2-3p, let-7f-

SCARA5 ENSOARGO( scavenge:

OSBPL8 ENSOARGO( oxystero

miR-376a-5p, miR-1961, miR-2300b-3p, miR-140-3p, miR-5703, miR-142-3p, novel\_73, miR-33b-3p, miR-148a-5p, miR-361-5p, miR-30d-3p, miR-15a-5p, miR-23c, miR-23b-3p, miR-2284h-5p, miR-2285p, miR-618, miR-345-3p, miR-98-5p, miR-202-5p, miR-21-3p, let-7k, miR-3653-3p, miR-1277-5p, miR-503-5p, miR-181b-1-3p, miR-125b-2-3p, miR-377-5p, miR-376a-5p, miR-450a-1-3p, miR-2285c, miR-299, miR-21a-3p, miR-433-3p, miR-27b-5p, miR-18a-5p, miR-186-5p, miR-504-5p, miR-140-5p, miR-532-5p, miR-216b-3p, miR-216b-5p, miR-6130, miR-10a, miR-377-3p, miR-15b-5p, let-7i-5p, miR-204-3p, miR-30e-3p, let-7f, miR-320e, miR-30a-3p, miR-450b-3p, miR-669a-3p, miR-424-5p, miR-4510, miR-3184-3p, let-7b, miR-10b-5p, miR-6525, miR-769-5p, miR-338-3p, miR-181c-5p, miR-122-5p, let-7b-5p, miR-10b, miR-125b-2-3p, miR-323b, miR-101a-5p, miR-330-3p, miR-105-1, miR-27a-3p, miR-145b, miR-181b-2-3p, miR-2285e, miR-148b-5p, miR-16b, miR-2957, miR-505, miR-323b-3p, miR-3085-3p, let-7e, miR-199b-5p, miR-424-5p, miR-1839-3p, miR-494-3p, miR-101b-3p, let-7a-5p, miR-1388-3p, miR-23a-3p, miR-8485, miR-199b-5p, miR-409-5p, miR-140-5p, miR-136-5p, miR-504, miR-544-5p, miR-877-3p, miR-335-3p, miR-3064-5p, miR-664b, miR-211-5p, miR-2285u, miR-489, miR-2483-3p, miR-27a-3p, miR-203-3p, let-7d-5p, miR-2285n, miR-218-5p, miR-769-5p, miR-2285y, miR-212-3p, miR-2447, miR-9-5p, miR-181d-5p, miR-452-5p, miR-219a-2-3p, miR-1285-5p, miR-345-3p, let-7d, let-7a-2-3p, miR-10a-5p, miR-105-2, miR-128-3p, miR-2285ad, miR-18b-5p, miR-9-5p, miR-302a-5p, miR-322-5p, miR-505-5p, novel\_121, miR-450a-1-3p, miR-545-5p, miR-219-3p, miR-664-3p, miR-6119-5p, miR-205-5p, let-7c-5p, miR-3071-3p, let-7f-5p, miR-191-3p, miR-181b-5p, miR-28-3p, miR-450a-2-3p, miR-3529-3p, miR-3064-5p, miR-30a-3p, miR-380-5p, miR-192-3p, miR-2285b, let-7g, miR-29a-5p, miR-199a-5p, miR-424-3p, miR-2448-

miR-6536, miR-1a-2-5p, novel\_96, miR-205-5p, miR-2285b, miR-29a-5p, novel\_39, miR-3064-5p, miR-23b-5p, miR-330-5p, miR-1343-5p, miR-505-5p, miR-486-5p, miR-450a-1-3p, miR-6517, miR-299a-3p, novel\_79, miR-3432a, miR-125b-5p, miR-6740-5p, miR-1260b, miR-876-3p, miR-2474, miR-300-3p, miR-376c-3p, miR-503-3p, miR-574-5p, miR-125a, miR-377-3p, novel\_51, miR-3141, miR-493-5p, miR-6240, miR-628-5p, miR-381-5p, miR-27b-3p, miR-4508, miR-542-3p, miR-432, miR-450c-3p, miR-22-3p, miR-149-5p, novel\_116, miR-339-5p, miR-29a, miR-6123, miR-576-3p, miR-485-3p, miR-301b-3p, miR-1a-1-5p, miR-29c-3p, miR-378f, miR-3141, miR-216a-3p, miR-299b-3p, miR-411b-3p, miR-669, miR-320c, novel\_68, miR-210-5p, miR-422a, miR-92a-1-5p, miR-219b-5p, miR-324-3p, miR-377-5p, miR-2285w, miR-345-3p, miR-34a-5p, miR-664-5p, miR-133a-3p, miR-218-1-3p, miR-378i, miR-378a-3p, miR-2284h-5p, miR-130b-5p, miR-129-5p, miR-454-3p, miR-4492, miR-2285j, miR-665, miR-6525, miR-122-5p, miR-3184-5p, miR-214, miR-339b, miR-186-5p, miR-1895, miR-450a-1-3p, miR-433-3p, miR-129b-3p, miR-2284s, miR-377-3p, miR-376e-3p, miR-301a-3p, miR-10a, miR-504-5p, miR-2331-3p, miR-30c-1-3p, miR-552-3p, miR-296-3p, miR-130b-3p, miR-487b-5p, miR-491-5p, miR-381-5p, miR-214-3p, miR-182-5p, miR-29b-1-5p, miR-378d, miR-8485, miR-1839-5p, miR-541, miR-2459, miR-1343-3p, miR-330-3p, miR-615, miR-361-3p, miR-423-5p, miR-6527, miR-668-5p, miR-504, miR-493-5p, miR-409-5p, miR-140-5p, miR-4443, miR-4792, miR-211-5p, miR-17-3p, miR-450a-2-3p, miR-2898, miR-1260a, miR-339a, miR-30c-2-3p, miR-1271-3p, miR-3065-3p, miR-3529-3p, miR-29b-2-5p, miR-10a-5p, miR-496, miR-128-3p, miR-615-3p, miR-29d-3p, miR-378h, miR-214-5p, miR-376a-5p, miR-138-5p, miR-204-5p, miR-5100, miR-370-5p, miR-29b-3p, miR-1-5p, miR-135a-5p, miR-3969, miR-331-3p, miR-378c, miR-6128, miR-320a, miR-34c-5p, miR-154b-5p, miR-324-5p, miR-28-5p, miR-486b-3p, miR-708-5p, miR-874-5p, miR-664a, miR-331-3p, miR-324-3p, miR-2433, miR-6134, miR-378c, miR-3184-5p, miR-1197-3p, miR-3074-5p, miR-4510, novel\_42, miR-378c, miR-1895, miR-22-3p, miR-6130, miR-34c-5p, miR-499b-3p, miR-1271, miR-370-3p, miR-2355-5p, miR-378a-3p, miR-543-5p, miR-34b-5p, miR-760-3p, miR-185-3p, miR-92a-1-5p, miR-422a, miR-324-3p, novel\_39, miR-486-3p, miR-3064-5p, miR-34a-5p, miR-128-3p, miR-1197-5p, miR-188-3p, miR-378a-3p, miR-378i, miR-615-3p, miR-1247-5p, miR-378h, miR-505-5p, miR-212-5p, miR-34c, miR-615, miR-2428, miR-449a, miR-423-5p, miR-24-3p, miR-361-3p, miR-1296-5p, miR-541-3p, miR-3956-3p, novel\_60, miR-378f, miR-1291, miR-216a-3p, miR-361-3p, miR-4443, miR-669, miR-34b, miR-378g, miR-499a-3p, miR-378e, miR-2404, miR-3074-5p, novel\_68, miR-3064-5p, miR-3085-3p, miR-7-5p, miR-4532, miR-378d, miR-628-5p, miR-2330-5p, miR-744-5p, miR-2889, miR-30b-3p, miR-378c, miR-30b-3p, miR-7857, miR-22-3p, miR-7b-5p, miR-541, miR-378b, miR-194-3p, miR-134-3p, miR-222-5p, miR-133b-5p



novel\_44, miR-3184-5p, miR-3074-5p, miR-214, miR-3958-5p, miR-454-3p, miR-500, miR-4492, miR-665, miR-582-5p, miR-10a, miR-301a-3p, miR-15b-5p, miR-2331-3p, miR-504-5p, miR-552-3p, miR-216b-3p, miR-339b, miR-345-5p, miR-1827, miR-625-5p, miR-450a-1-3p, miR-129b-3p, miR-500a-3p, miR-377-5p, miR-181b-1-3p, miR-376a-5p, miR-486-3p, miR-195a-3p, novel\_17, miR-324-3p, miR-1247-5p, miR-18a-3p, miR-212-5p, miR-33b-3p, miR-142-3p, miR-34a-5p, miR-218-1-3p, miR-664-5p, miR-361-3p, miR-423-5p, miR-2447, miR-490-5p, miR-2440, miR-218-5p, novel\_82, miR-301a-5p, miR-499a-3p, miR-4443, miR-144-5p, miR-2319b, miR-139-5p, miR-504, miR-136-5p, miR-1983, miR-335-3p, miR-221, miR-140-5p, miR-744-3p, miR-130b-3p, miR-491-5p, miR-214-3p, miR-182-5p, miR-16b, miR-1298-3p, miR-2459, miR-126a-5p, miR-330-3p, miR-1343-3p, miR-181b-2-3p, miR-1388-5p, miR-1839-5p, miR-301b-5p, miR-2284r, miR-1260b, miR-144-5p, miR-16-5p, miR-331-5p, miR-6740-5p, miR-874-3p, miR-1271, miR-345-5p, miR-329b, miR-331-5p, miR-450b-5p, miR-2285b, miR-450c-5p, miR-29a-5p, miR-3064-5p, miR-127-5p, novel\_96, miR-152-3p, novel\_127, miR-200a-3p, miR-322-5p, miR-450a-1-3p, miR-18b-5p, novel\_79, miR-412, miR-330-5p, miR-301b-3p, miR-181b-3p, miR-669, miR-677, miR-320c, miR-3074-5p, miR-412-3p, miR-410-5p, miR-148a-3p, miR-216a-3p, miR-150-5p, miR-3970, let-7j, miR-6240, miR-380-5p, miR-378a-5p, miR-483-3p, miR-296-3p, novel\_51, miR-194a, miR-105-5p, miR-3431, miR-412-5p, novel\_116, miR-149-5p, miR-103a-3p, miR-31-5p, miR-339-5p, miR-16b, miR-369-5p, miR-4508, miR-497-5p, miR-432, miR-19b-2-5p, miR-450c-3p, miR-10b-5p, miR-6134, miR-338-3p, miR-4510, miR-145a-3p, miR-539-5p, miR-2330-3p, miR-664a, miR-450b-3p, miR-208b-5p, miR-424-5p, miR-222-3p, miR-338-5p, miR-29b-2-5p, miR-320e, miR-369-5p, miR-19b-1-5p, miR-139-5p, miR-323-5p, miR-6130, miR-6516, novel\_32, miR-204-3p, miR-140-

miR-450b-5p, miR-16-2-3p, miR-1839-5p, miR-143-5p, miR-2284r, miR-412-3p, miR-142-3p, miR-142-5p, miR-1298-3p, miR-2285e, miR-9788-3p, novel\_78, novel\_4, miR-330-3p, miR-2300a-5p, miR-27a-3p, miR-130b-3p, miR-1468, miR-214-3p, miR-199b-5p, miR-1306-5p, miR-431-5p, miR-16b, miR-106b-5p, miR-193a, miR-106a-5p, miR-424-5p, miR-1388-3p, miR-124a, miR-574-3p, miR-652-5p, miR-199b-5p, miR-361-3p, miR-3596, miR-27a-3p, miR-335, miR-3968, miR-4726-5p, novel\_111, miR-423-5p, miR-2284j, miR-9-5p, miR-218-1-3p, miR-2366, miR-124-3p, miR-15a-5p, miR-148b-3p, miR-151-5p, miR-106a, miR-212-5p, miR-760-3p, miR-106a, miR-2284m, miR-21-3p, novel\_17, miR-210-5p, miR-185-3p, miR-142a-3p, miR-376c-3p, miR-2285i, miR-20a, miR-195a-3p, miR-18a-5p, miR-133b-3p, miR-186-5p, miR-2285c, miR-376e-3p, miR-301a-3p, miR-155-5p, miR-151b, miR-15b-5p, miR-22-3p, miR-2331-3p, miR-552-3p, miR-532-5p, miR-370-5p, miR-664a, miR-155-5p, novel\_74, miR-424-5p, miR-1468-5p, miR-4492, miR-454-3p, miR-224-5p, miR-142a-5p, miR-3184-5p, miR-665-5p, miR-214, miR-1260b, miR-16b, miR-138, miR-29b, miR-7862, miR-6239, miR-27b-3p, miR-497-5p, miR-1434-3p, miR-22-3p, miR-2285g, miR-2284d, miR-187-3p, miR-130a-3p, miR-124-5p, miR-452-5p, miR-224-5p, miR-17-5p, novel\_51, miR-330-3p, miR-2284l, miR-6240, miR-363-5p, miR-382, miR-2285k, miR-195a-5p, miR-148a-3p, miR-18b, miR-216a-3p, miR-1306, novel\_69, miR-29a-3p, miR-146b-3p, miR-2404, novel\_68, miR-655-5p, miR-29a, miR-128-1-5p, miR-20a-5p, miR-28c, miR-15a, miR-382-5p, miR-16a, miR-24-3p, miR-199b-5p, miR-301b-3p, miR-2284w, miR-1a-1-5p, miR-335-5p, miR-136-3p, miR-29c-3p, miR-1193, miR-2285x, miR-128-3p, miR-155-5p, miR-1290, miR-29d-3p, miR-9-5p, miR-322-5p, miR-6517, miR-18b-5p, miR-431, miR-412, miR-1224-5p, miR-1a-2-5p, miR-2898, miR-543-5p, miR-200a-3p, miR-152-3p, miR-125a-3p, miR-

novel\_79, miR-1224-5p, miR-196a-2-3p, miR-7641, miR-412, miR-2285ad, miR-429-3p, miR-134-5p, miR-129-1-3p, novel\_121, miR-486-5p, miR-615-3p, miR-134, miR-3578, miR-200b-3p, let-7a-2-3p, miR-496, miR-3064-5p, miR-30a-3p, miR-2403, miR-181a-2-3p, novel\_39, miR-199a-5p, miR-3065-3p, miR-2285b, miR-490-3p, miR-1271-3p, miR-380-5p, miR-28b, miR-450b-5p, miR-339a, miR-664-3p, miR-200c, miR-200c-3p, miR-2355-5p, miR-1271, miR-503-3p, miR-874-3p, miR-223-5p, miR-133c, miR-199a-5p, miR-34c-5p, miR-503-3p, miR-301, miR-2448-3p, miR-671-5p, miR-10b-3p, miR-345-5p, let-7g-3p, miR-331-3p, miR-6740-5p, miR-135a-5p, miR-2433, miR-5100, miR-370-5p, miR-3432a, miR-134-5p, miR-28-5p, miR-138-5p, miR-339-5p, miR-3535, miR-432-5p, miR-3431, miR-432, miR-223-3p, miR-1843b-5p, miR-1434-3p, miR-4508, miR-455-5p, miR-744-5p, miR-7862, miR-2889, miR-138, miR-219a-1-3p, miR-380-5p, miR-6240, miR-493-5p, miR-345-5p, let-7a-2-3p, miR-2285r, miR-330-3p, miR-3141, novel\_51, miR-455-5p, miR-378a-5p, miR-320b, miR-677, miR-6535, miR-181b-3p, miR-34b, miR-1306, miR-150-5p, miR-2285ab, miR-3141, miR-2319a, miR-135b-5p, miR-1291, miR-758-5p, novel\_101, miR-1193, miR-136-3p, miR-449a, miR-374c-5p, miR-199b-5p, miR-2284w, miR-24-3p, miR-323c, miR-34c, miR-4324, miR-28c, miR-22-5p, miR-656-5p, miR-502b, miR-199c, miR-1b-3p, miR-380-5p, miR-3600, miR-212-5p, miR-3960, miR-532-3p, miR-2284h-5p, miR-200b, miR-124-3p, miR-2904, miR-1434-5p, miR-1197-5p, miR-188-3p, novel\_133, miR-1246, miR-2366, miR-376a-5p, miR-133a-3p, miR-34a-5p, miR-33b-3p, miR-345-3p, miR-376a-5p, miR-181b-1-3p, miR-130a-5p, miR-500a-5p, miR-185-3p, novel\_17, miR-210-5p, miR-34b-5p, miR-221-5p, miR-760-3p, miR-466i-5p, miR-370-5p, miR-3065-3p, miR-221-5p, miR-204-3p, miR-27b-5p, miR-625-5p, miR-1895, novel\_99, let-7a-3p, miR-345-5p, miR-330b, miR-2330, miR-3431, miR-500-5p, miR-411-5p, miR-199b-3p, miR-151a-3p, miR-27a-3p, miR-181b-2-3p, miR-1388-5p, miR-362-3p, miR-16-2-3p, miR-2284x, miR-27b-3p, miR-329-3p, miR-450c-3p, let-7j, miR-380-5p, let-7c-3p, miR-382, miR-199b-5p, miR-320b, miR-105-5p, miR-362-3p, miR-182-5p, miR-320c, miR-677, miR-27a-3p, miR-181b-3p, miR-139-5p, miR-2285u, miR-96-5p, miR-135b-5p, miR-376b-5p, miR-199b-5p, miR-18a-3p, miR-381-3p, miR-216a-3p, miR-362-5p, miR-877-3p, novel\_111, miR-199b-5p, miR-452-5p, novel\_1, miR-421-5p, miR-199c, miR-154-3p, miR-2285n, miR-2285y, miR-302a-5p, miR-505-5p, miR-758-5p, miR-1271-5p, miR-450a-1-3p, miR-2284h-5p, novel\_121, miR-2285ad, miR-18a-3p, miR-300, miR-4429, miR-128-3p, miR-3591-5p, miR-362-3p, miR-380-5p, miR-376c-3p, miR-199a-5p, miR-2285b, miR-192-3p, miR-2285w, miR-487a, miR-29b-2-5p, miR-320d, miR-760-3p, novel\_127, miR-210-5p, miR-664-3p, miR-376e-3p, miR-139-5p, miR-199a-5p, miR-376c-3p, miR-154b-5p, miR-487a-3p, miR-548o-3p, miR-154a-3p, miR-182-5p, let-7g-3p, miR-154b-3p, miR-329a, miR-381-3p, miR-450a-1-3p, miR-2448-3p, miR-137-3p, miR-376c-5p, miR-362-5p, miR-320a, miR-500b-5p, miR-1271, miR-3074-2-3p, miR-450b-3p, miR-6516-3p, miR-208b-5p, miR-410-5p, miR-15b-3p, miR-151-3p, miR-665, miR-29b-2-5p, miR-135a-5p

HAS1

ENSOARGO(hyaluron

PKN2

ENSOARGO(protein

miR-760-3p, miR-2898, miR-4492, miR-326, miR-185-3p, novel\_51, miR-19b-1-5p, miR-2428, miR-326-3p, miR-145a-3p, miR-219a-1-3p, miR-450b-5p, miR-1843b-5p, novel\_133, miR-19b-2-5p, miR-330-5p, miR-6516-5p, miR-6516, miR-2459, miR-154b-5p, miR-1343-3p, miR-296-3p, miR-7641

FAM155B ENSOARGOC family w 3p, miR-125b-2-3p, miR-181a-2-3p, miR-541-3p, miR-1a-1-5p, miR-19b-2-5p, miR-330-5p, miR-6516-5p, miR-6516, miR-2459, miR-154b-5p, miR-1343-3p, miR-296-3p, miR-7641

SRD5A1 ENSOARGOC steroid-494-3p, miR-151a-3p, miR-133a-3p, miR-885-3p, miR-885-3p, miR-1a-2-5p, miR-151-3p, miR-485-3p, miR-1-5p, miR-541

miR-128-1-5p, miR-6527, miR-423-5p, miR-326-3p, miR-362-5p, miR-24-3p, miR-216a-3p, miR-1983, miR-299b-5p, miR-412-3p, miR-320b, miR-323a-5p, miR-326, miR-125a-5p, miR-214-3p, miR-378a-5p, miR-483-3p, miR-676-3p, miR-744-3p, miR-628-5p, miR-3187-3p, miR-4532, miR-412-3p, miR-22-3p, miR-758-3p, miR-484, miR-542-3p, miR-3120-5p, miR-138, miR-1260b, miR-2426, miR-339-5p, miR-340-3p, miR-3955-5p, miR-133b-5p, miR-500-5p, miR-194-3p, miR-331-3p, miR-125b-5p, miR-29d-5p, miR-15b-3p, miR-874-5p, miR-134-5p, miR-138-5p, miR-664a, miR-155-5p, miR-214, miR-4510, miR-3184-5p, miR-500b-5p, miR-1260b, miR-29c-5p, miR-129b-3p, miR-27b-5p, miR-362-5p, miR-885-3p, miR-671-5p, miR-1248, miR-339b, miR-370-3p, miR-216b-3p, miR-3956, miR-125a, miR-3957-5p, miR-22-3p, miR-877-5p, miR-155-5p, miR-3957, miR-6130, miR-323-5p, miR-3601, miR-219b-5p, miR-125b, miR-339a, miR-1260a, miR-760-3p, miR-105-3p, miR-2411, miR-2904, miR-330-5p, miR-2408, miR-2366, miR-134, miR-128-3p, miR-155-5p, miR-378d, miR-885-3p, miR-412, novel\_79, miR-134-5p, miR-1247-5p, miR-214-5p, miR-505-5p, miR-483-3p, miR-2411-5p

FAM20A ENSOARGOC family w 5p, miR-214, miR-4510, miR-3184-5p, miR-500b-5p, miR-1260b, miR-29c-5p, miR-129b-3p, miR-27b-5p, miR-362-5p, miR-885-3p, miR-671-5p, miR-1248, miR-339b, miR-370-3p, miR-216b-3p, miR-3956, miR-125a, miR-3957-5p, miR-22-3p, miR-877-5p, miR-155-5p, miR-3957, miR-6130, miR-323-5p, miR-3601, miR-219b-5p, miR-125b, miR-339a, miR-1260a, miR-760-3p, miR-105-3p, miR-2411, miR-2904, miR-330-5p, miR-2408, miR-2366, miR-134, miR-128-3p, miR-155-5p, miR-378d, miR-885-3p, miR-412, novel\_79, miR-134-5p, miR-1247-5p, miR-214-5p, miR-505-5p, miR-483-3p, miR-2411-5p

miR-29b-2-5p, miR-1, miR-181a-2-3p, miR-490-3p, miR-30c-2-3p, miR-1260a, miR-376b-3p, miR-200c, miR-543-5p, miR-450a-2-3p, miR-181b-5p, miR-200c-3p, miR-582-3p, miR-378h, miR-2411-5p, miR-134, miR-200b-3p, miR-128-3p, miR-496, let-7a-2-3p, miR-6128, miR-374b, miR-145-3p, miR-378c, miR-365a-5p, miR-93, miR-331-3p, miR-144, miR-409-3p, miR-135a-5p, miR-615-5p, miR-154b-5p, miR-769, miR-18a, miR-3154, miR-17-5p, miR-488-3p, miR-3074-1-3p, miR-671-5p, miR-485-5p, miR-1814c, let-7g-3p, miR-130b-5p, miR-654-3p, miR-330-3p, miR-106a-5p, miR-17-5p, miR-466f-3p, miR-124-5p, miR-2285l, miR-20b, miR-432-5p, miR-2285g, miR-185-5p, miR-3071-5p, miR-374b-3p, miR-194-5p, miR-181a-5p, miR-1434-3p, miR-7862, miR-2284ab, miR-219a-1-3p, miR-1260b, miR-2285x, miR-342-3p, novel\_27, miR-2428, miR-323c, miR-16a, miR-15a, miR-133a-5p, miR-6402, miR-20a-5p, miR-656-5p, miR-199c, miR-502b, miR-128-1-5p, novel\_1, miR-320b, miR-146b-3p, miR-2404, miR-376b-3p, miR-18b, miR-2387, miR-6395, miR-195a-5p, miR-135b-5p, miR-1291, miR-450b-3p, miR-20a, miR-5100, miR-216c-5p, miR-2432, miR-2411, miR-29b-1-5p, miR-216a-5p, miR-30b-3p, miR-221-5p, miR-21-3p, miR-106a, miR-760-3p, miR-485-3p, miR-199a-3p, novel\_83, miR-532-3p, miR-487a-3p, miR-15a-5p, miR-222-5p, miR-200b, miR-140-3p, miR-5703, miR-378d, miR-4429, miR-3074-2-3p, miR-378c, miR-338-3p, miR-206-3p, miR-29b-2-5p, miR-320e, miR-424-5p, miR-155-5p, miR-664a, miR-532-5p, miR-140-5p, miR-221-5p, miR-378a-3p, miR-496-3p, miR-204-3p, novel\_32, miR-22-3p, miR-155-5p, miR-193b-3p, miR-139-5p, novel\_99, miR-18a-5p, miR-382-3p, miR-424-5p, miR-494-3p, miR-106a-5p, miR-4532, miR-3187-3p, miR-758-3p, miR-30c-1-3p, miR-2957, miR-342, miR-2285o, miR-3085-3p, miR-5010-3p, miR-222-5p, miR-2300a-5p, miR-216a-3p, miR-2285e, miR-125b-2-3p, miR-378h, miR-2284aa, miR-3120-5p, miR-378c, miR-

GPD1L ENSOARGO(glycerol

miR-2284q, miR-4726-5p, miR-2285y, miR-1973, miR-30b-5p, miR-2285n, miR-154a, miR-212-3p, miR-541-3p, miR-3059-5p, miR-877-3p, novel\_94, miR-129b-5p, miR-199b-5p, miR-361-3p, miR-27a-3p, miR-7977, miR-664b, miR-3064-5p, miR-1468, miR-25-5p, miR-3955-3p, miR-3085-3p, miR-326, miR-5126, miR-758-3p, miR-4532, miR-30c-1-3p, miR-382-3p, miR-424-5p, miR-3120-5p, miR-101a-5p, miR-143-5p, miR-296-5p, miR-27a-3p, novel\_4, miR-2300a-5p, miR-424-5p, miR-664a, miR-6516-3p, miR-1843b-3p, miR-450b-3p, miR-324-3p, miR-6134, miR-582-5p, novel\_99, miR-30f, let-7f-1-3p, miR-21a-3p, miR-370-5p, miR-660-5p, miR-30d, miR-125b, miR-185-3p, miR-216a-5p, miR-412-5p, miR-196a-3p, miR-125b-2-3p, miR-29b-1-5p, let-7a-3p, miR-2904, miR-376a-5p, miR-2300b-3p, miR-1246, novel\_83, miR-340-5p, miR-15a-5p, miR-3600, miR-3960, miR-502b, miR-656-5p, novel\_1, miR-16a, miR-6529b, miR-15a, miR-2428, miR-326-3p, miR-1193, miR-136-3p, miR-195a-5p, miR-135b-5p, miR-1291, miR-378b, miR-2387, miR-670-3p, miR-2404, miR-146b-3p, miR-1343-5p, miR-452-5p, miR-125a-5p, miR-660, miR-99a-5p, miR-224-5p, miR-654-3p, miR-130b-5p, miR-744-5p, miR-138, miR-2284ab, miR-374b-3p, miR-1285, miR-2355-3p, miR-26b-3p, miR-130a-3p, miR-133b-5p, miR-187-3p, miR-486b-3p, miR-138-5p, miR-135a-5p, miR-3969, miR-144, miR-331-3p, miR-370-5p, miR-551b-3p, miR-365a-5p, miR-10b-3p, miR-100-5p, miR-503-3p, miR-154b-5p, miR-199a-5p, miR-141-3p, miR-543-5p, miR-2898, miR-339a, miR-30c-2-3p, miR-99a, miR-199a-5p, miR-3529-3p, miR-99a-5p, miR-582-3p, miR-411-3p, miR-30a-5p, miR-3578, miR-345-3p, miR-214-5p, miR-545-5p, miR-490-5p, miR-101-3p, miR-1285-5p, miR-361-3p, miR-877-3p, miR-1983, miR-335-3p, miR-668-5p, miR-504, miR-99b-5p, miR-4443, miR-378g, miR-3596, miR-2285u, miR-4792, miR-381-5p, miR-199b-5p, miR-191-5p, miR-16b, miR-29b-1-5p, miR-2210, miR-487a, miR-2284a, miR-2285b, miR-539-3p, miR-2284y, miR-500, miR-3068-3p, miR-487a-3p, miR-532-5p, miR-485-3p, miR-154a-3p, miR-374c-3p, miR-487a-3p, miR-1185-3p, miR-1185-2-3p, miR-21a-3p, miR-500a-3p, miR-154b-3p, miR-2284u, miR-186-5p

CAPN7 ENSOARGO0 calpain

FZD3 ENSOARGO0 frizzled

miR-552-3p, miR-221-5p, miR-30c-1-3p, miR-504-5p, miR-151b, miR-139-5p, miR-582-5p, miR-544-3p, miR-2284s, miR-30d-5p, miR-27b-5p, miR-129b-3p, miR-1827, miR-582-5p, miR-625-5p, miR-30f, miR-425-5p, miR-3184-3p, miR-224-5p, miR-142a-5p, miR-769-5p, miR-3604, miR-665, miR-29b-2-5p, miR-708-5p, novel\_74, miR-1b-3p, miR-151-5p, novel\_83, miR-5703, miR-124-3p, miR-2904, miR-193b-5p, miR-2366, miR-30c-5p, miR-2284u, miR-218-1-3p, miR-4429, miR-19b-3p, miR-493-3p, miR-143-3p, miR-29b-1-5p, miR-125b, miR-345-3p, miR-185-3p, miR-324-3p, miR-210-5p, miR-196a-3p, miR-30b, miR-21-3p, miR-221-5p, miR-30d, miR-760-3p, miR-320d, miR-2284m, miR-499b-5p, miR-139-5p, miR-2284g, miR-1185-2-3p, miR-4443, miR-3082-5p, miR-378g, miR-9-3p, miR-504, miR-452-5p, miR-2284j, miR-769-5p, miR-30b-5p, miR-4726-5p, miR-222-5p, miR-199b-3p, novel\_78, miR-1343-3p, miR-1185-3p, miR-9788-3p, miR-455-3p, miR-216a-3p, miR-142-5p, miR-30b-3p, miR-323b, miR-412-3p, miR-7857, miR-484, miR-544a, miR-2284b, let-7c-3p, miR-2330-5p, miR-124a, miR-3187-3p, miR-4532, miR-30c-1-3p, miR-323b-3p, miR-29b-1-5p, novel\_115, miR-1306-5p, miR-320b, miR-342, miR-3955-3p, miR-491-5p, miR-1271, miR-125a, miR-874-3p, miR-2284n, miR-769, miR-374c-3p, miR-320a, miR-3154, miR-30e-5p, miR-485-5p, miR-671-5p, miR-1248, let-7g-3p, miR-2284v, miR-365a-5p, miR-145-3p, miR-1197-3p, miR-1260b, miR-125b-5p, miR-2284k, miR-28-5p, miR-412, miR-6517, miR-30a-5p, miR-345-3p, let-7a-2-3p, miR-30c, miR-582-3p, miR-4286, miR-29b-2-5p, miR-3529-3p, miR-2284a, miR-2284y, novel\_39, miR-28b, miR-30c-2-3p, miR-125a-3p, miR-1260a, novel\_96, miR-320c, miR-6535, miR-669, miR-374c-3p, miR-1306, miR-9851-3p, miR-19a-3p, miR-1291, miR-342-3p, miR-2428, miR-24-3p, miR-28c, miR-502b, miR-199c, miR-26b-3p, miR-122b-5p, miR-124-3p, miR-185-5p, miR-2421, miR-2284d, miR-122-3p, miR-181a-5p, miR-19b-2-5p, miR-378b, miR-138, miR-378c, miR-27b-3p, miR-1343-3p, miR-27a-3p, miR-9788-3p, miR-455-3p, novel\_116, miR-32, miR-365b-5p, miR-124-5p, miR-199b-5p, miR-382-3p, miR-130b-5p, let-7c-3p, miR-2285r, miR-378d, let-7a-2-3p, miR-199b-5p, miR-216a-3p, miR-129b-5p, miR-2284e, miR-378f, miR-135b-5p, miR-335-3p, miR-378b, miR-329-5p, miR-25, miR-378e, miR-27a-3p, miR-208a-3p, miR-379-3p, miR-92a-3p, miR-2285t, miR-363-3p, miR-2447, miR-181d-5p, miR-199b-5p, miR-378i, miR-378a-3p, miR-1197-5p, miR-188-3p, miR-5703, miR-217-5p, miR-411-3p, let-7a-2-3p, miR-128-3p, miR-378h, miR-545-5p, novel\_17, miR-208b-3p, miR-217, miR-422a, miR-181b-5p, miR-92a-3p, miR-329a-5p, miR-130a-5p, miR-92b-3p, miR-199a-5p, miR-411, miR-433-3p, miR-2318, let-7g-3p, miR-671-5p, miR-7144-5p, miR-32-5p, miR-378a-3p, miR-25-3p, miR-199a-5p, miR-204-3p, novel\_63, miR-135a-5p, miR-19b-1-5p, miR-138-5p, miR-130b-5p, miR-145a-3p, miR-378c, miR-181c-5p, miR-365a-5p, miR-378c, miR-145-3p

miR-342-3p, miR-6517, miR-124-5p, miR-188-5p, miR-342, miR-2957, miR-505, miR-125b-2-3p

TMED3 ENSOARGO( transmem

ZNF432 ENSOARGO( zinc fin

FAM208A ENSOARGO( family w

miR-199b-5p, miR-140-5p, miR-136-5p, miR-1983, miR-376a-3p, miR-452-3p, miR-664b, miR-139-5p, miR-7977, miR-7689-3p, miR-499b-5p, miR-489, miR-3596, miR-378e, miR-378g, miR-27a-3p, miR-376d, let-7d-5p, miR-203-3p, miR-218-5p, miR-301a-5p, miR-2285y, miR-371a-5p, miR-7134-3p, miR-3956-3p, novel\_60, miR-3059-5p, miR-2447, miR-9-5p, miR-181d-5p, miR-154a, miR-10b, miR-4791, miR-301b-5p, miR-296-5p, miR-329-3p, miR-378b, miR-6529a, miR-30b-3p, miR-544a, miR-2426, miR-362-3p, miR-378c, miR-1839-5p, novel\_78, miR-199b-3p, novel\_4, miR-1343-3p, miR-151a-3p, miR-409b, miR-27a-3p, miR-5010-3p, miR-142-3p, miR-376b-3p, miR-153, miR-421, miR-148b-5p, miR-216a-3p, miR-1306-5p, miR-182-5p, miR-362-3p, miR-29b-1-5p, let-7e, miR-153-3p, miR-199b-5p, let-7a-5p, miR-744-3p, miR-378d, miR-2310, miR-8485, miR-193a, miR-450a-1-3p, miR-598-3p, miR-339b, miR-582-5p, miR-186-5p, miR-548o-3p, miR-378a-3p, miR-2331-3p, miR-182-5p, miR-216b-5p, miR-139-5p, miR-582-5p, miR-544-3p, miR-10a, miR-27a-5p, let-7i-5p, novel\_32, miR-22-3p, miR-204-3p, miR-30e-3p, let-7f, miR-3604, miR-30a-3p, miR-151-3p, miR-17-3p, miR-450b-3p, miR-708-5p, miR-145a-3p, miR-3074-5p, miR-3184-3p, let-7b, miR-378c, miR-224-5p, miR-10b-5p, miR-6525, miR-181c-5p, let-7b-5p, miR-1961, miR-362-3p, miR-378i, miR-1197-5p, miR-140-3p, miR-378a-3p, miR-188-3p, miR-5703, miR-2904, miR-148a-5p, miR-16-1-3p, miR-212-5p, miR-30d-3p, miR-3600, miR-222-5p, miR-383-5p, novel\_83, miR-422a, miR-216a-5p, miR-98-5p, miR-760-3p, let-7k, miR-299-3p, miR-216c-5p, miR-345-3p, miR-142a-3p, miR-29b-1-5p, miR-664b-3p, miR-2432, miR-216a-3p, miR-376b-3p, miR-3065-5p, miR-1306, miR-412-3p, miR-1291, miR-378f, let-7e-5p, miR-378b, miR-3074-5p, miR-7-1-3p, miR-10a-5p, miR-670-3p, miR-299b-3p, miR-6525, miR-6529b, miR-576-3p, let-7i, miR-485-3p, novel\_1, miR-134-3p, miR-25, miR-2404, miR-378g, miR-370-3p, miR-412-3p, miR-345-5p, miR-345-5p, miR-1983, miR-3120-5p, miR-125b-2-3p, miR-345-5p, miR-3956-3p, novel\_60, miR-214, miR-664a, miR-214-3p

ZNF350

ENSOARGO(zinc fin

ITGB1BP1

ENSOARGO(integrin



miR-33b-5p, miR-301b-3p, miR-199b-5p, miR-4324, miR-576-3p, miR-329-5p, miR-3074-5p, miR-669, miR-299b-3p, miR-374c-3p, miR-1306, miR-148a-3p, miR-146b-5p, miR-432-3p, miR-365b-5p, novel\_51, miR-377-3p, miR-146a, miR-106b-3p, miR-339-5p, miR-31-5p, miR-194-3p, miR-134-3p, miR-26a-2-3p, miR-193a-5p, miR-1260b, miR-125b-5p, miR-134-5p, miR-2285aa, miR-2355-5p, miR-125a, miR-574-5p, miR-503-3p, miR-874-3p, miR-93-5p, miR-20b-5p, miR-767, miR-329a, miR-329b, miR-345-5p, miR-2284y, miR-29a-5p, miR-3071-3p, miR-152-3p, novel\_127, miR-200a-3p, miR-127-5p, novel\_79, miR-18b-5p, miR-299a-3p, miR-2285ad, miR-6517, miR-134-5p, miR-129-1-3p, miR-505-5p, miR-1343-5p, miR-330-5p, miR-1290, miR-1285-5p, miR-877-3p, miR-615, miR-2440, miR-101-3p, miR-2284g, miR-24-1-5p, miR-2319b, miR-1185-2-3p, miR-499a-3p, miR-378g, miR-2483-3p, miR-140-5p, miR-376a-3p, miR-136-5p, miR-1388-3p, miR-8485, miR-29b-1-5p, miR-106b-5p, miR-199b-5p, miR-146b, miR-103a-2-5p, miR-214-3p, miR-487b-5p, miR-130b-3p, miR-1343-3p, miR-148b-5p, miR-1185-3p, miR-376b-3p, miR-147a, miR-329-3p, miR-1388-5p, miR-362-3p, miR-214, miR-129-2-3p, miR-3074-5p, miR-181c-5p, miR-142a-5p, miR-6525, miR-224-5p, miR-30a-3p, miR-665, miR-2285j, miR-129-5p, miR-874-5p, miR-454-3p, miR-130b-5p, miR-487b-5p, miR-30c-1-3p, miR-377-3p, miR-301a-3p, miR-499b-3p, miR-129b-3p, miR-433-3p, miR-1827, miR-186-5p, miR-345-5p, miR-339b, miR-345-3p, miR-329a-5p, miR-503-5p, miR-219b-5p, miR-500a-5p, miR-92a-1-5p, miR-210-5p, miR-2285p, miR-618, novel\_17, miR-2484, miR-30d-3p, miR-212-5p, miR-18a-3p, miR-106a, miR-34a-5p, miR-148a-5p, miR-2284u, miR-493-3p, miR-142-3p, miR-2285x, miR-495-3p, miR-1193, miR-449a, novel\_27, miR-326-3p, miR-371b-3p, miR-34c, miR-6402, miR-6529b, miR-133a-5p, miR-20a-5p, miR-656-5p, miR-147-5p, miR-502b, miR-128-1-5p, miR-320b, miR-323a-

miR-809b, miR-502-3p, miR-362-5p, miR-361-3p, miR-1296-5p, miR-3956-3p, miR-2447, novel\_60, miR-2285t, miR-628-3p, miR-499a-5p, miR-301a-5p, miR-30b-5p, miR-382-3p, miR-500-3p, miR-203-3p, miR-489, miR-499a-3p, miR-7977, miR-211-5p, miR-126b-5p, miR-541-5p, miR-3064-5p, miR-1983, miR-96-5p, miR-221, miR-199b-5p, miR-409-5p, miR-361-3p, miR-3187-3p, miR-8485, miR-23a-3p, miR-676-3p, miR-101b-3p, miR-424-5p, miR-124a, miR-214-3p, miR-199b-5p, miR-491-5p, miR-3085-3p, miR-16b, miR-362-3p, miR-505, miR-1306-5p, novel\_115, miR-216a-3p, miR-500-5p, miR-221-3p, miR-2320-3p, miR-181b-2-3p, miR-222-5p, miR-199b-3p, novel\_78, miR-2300a-5p, miR-330-3p, miR-409b, miR-362-3p, miR-501-3p, miR-412-3p, miR-301b-5p, miR-484, miR-329-3p, miR-122-5p, miR-6525, miR-214, miR-3074-2-3p, miR-1271, miR-145a-3p, miR-590-3p, miR-4492, miR-424-5p, miR-664a, miR-155-5p, miR-324-3p, miR-222-3p, miR-15b-5p, miR-22-3p, miR-204-3p, miR-582-5p, miR-6516, miR-27a-5p, miR-192-5p, miR-499b-3p, miR-21-3p, miR-3065-3p, miR-496-3p, miR-582-5p, miR-885-3p, miR-30f, miR-30d-5p, miR-129b-3p, miR-21a-3p, miR-486-3p, miR-181b-1-3p, miR-376a-5p, miR-30d, miR-1277-5p, miR-99a-3p, miR-345-3p, miR-219b-5p, miR-324-3p, miR-26a-5p, miR-210-5p, miR-30b, novel\_83, miR-15a-5p, miR-23c, miR-7859, miR-23b-3p, miR-3960, miR-19b-3p, miR-33b-3p, miR-5703, miR-140-3p, miR-124-3p, miR-2366, miR-362-3p, miR-215-5p, miR-376a-5p, miR-193b-5p, miR-30c-5p, miR-199b-5p, miR-2428, miR-2284w, miR-2285m, novel\_27, miR-211, novel\_120, miR-199c, miR-22-5p, miR-421-5p, novel\_1, miR-33a-3p, novel\_87, miR-16a, miR-502-5p, miR-15a, miR-181b-3p, miR-677, miR-144-3p, novel\_69, miR-670-3p, miR-3120-3p, miR-26b-5p, miR-655-5p, miR-195a-5p, miR-19a-3p, miR-412-3p, miR-3591-3p, miR-1306, miR-432-3p, miR-628-5p, miR-2483-5p, miR-6240, miR-466f-3p, miR-452-5p, miR-106b-3p, miR-2411-

miR-181b-3p, miR-677, miR-669, miR-34b, miR-299b-3p, miR-323a-5p, miR-320b, miR-216b-3p, miR-146b-5p, miR-19a-3p, miR-3591-3p, miR-216a-3p, miR-18a-3p, miR-148a-3p, miR-2428, miR-449a, miR-323c, miR-17-3p, miR-502b, miR-147-5p, miR-92a-3p, miR-382-5p, miR-34c, miR-576-3p, miR-544b, miR-2355-3p, miR-194-3p, novel\_116, miR-3431, miR-377-5p, miR-133b-5p, miR-3955-5p, miR-187-3p, miR-7862, miR-27b-3p, miR-1260b, miR-16-1-3p, miR-138, miR-1843b-5p, miR-1285, miR-542-3p, miR-1434-3p, miR-2113, miR-708-3p, let-7j, miR-466f-3p, miR-2331-5p, miR-32, miR-146a, miR-25-3p, miR-34c-5p, miR-2355-5p, miR-485-5p, miR-7144-5p, miR-329a, miR-137-3p, miR-503-3p, miR-488-3p, miR-374a-3p, miR-1260b, miR-133a-3p, miR-6128, miR-374b-3p, miR-138-5p, miR-2332, miR-5100, miR-34c-3p, miR-2411-5p, miR-412, miR-429-3p, miR-299a-3p, miR-200b-3p, miR-128-3p, miR-1271-3p, miR-92b-3p, miR-181a-2-3p, miR-3064-5p, miR-92a-3p, novel\_96, novel\_127, miR-152-3p, miR-200c-3p, miR-127-5p, miR-17-3p, miR-219-3p, miR-200c, miR-1260a, miR-27a-3p, miR-2483-3p, miR-499b-5p, miR-3064-5p, miR-299b-5p, miR-381-3p, miR-219a-2-3p, miR-452-5p, miR-363-3p, miR-3059-5p, miR-374a-3p, miR-107-5p, novel\_82, miR-421, miR-153, miR-181b-2-3p, miR-27a-3p, miR-3120-5p, miR-544a, miR-362-3p, miR-412-3p, miR-143-5p, miR-329-3p, miR-8485, miR-103a-2-5p, miR-146b, miR-153-3p, miR-3085-3p, miR-491-5p, miR-362-3p, miR-656-3p, miR-323-5p, miR-544-3p, miR-21-3p, miR-32-5p, miR-186-5p, miR-133b-3p, miR-208b-5p, miR-664a, miR-17-3p, miR-338-5p, miR-664a-5p, miR-219b-3p, miR-616-3p, miR-200b, miR-148b-3p, miR-18a-3p, miR-378d, miR-34a-5p, miR-218-1-3p, miR-664-5p, miR-16-1-3p, miR-142-3p, miR-33b-3p, miR-19b-3p, miR-140-3p, miR-1197-5p, miR-362-3p, miR-2411, miR-146a-5p, miR-377-5p, miR-181b-1-3p, miR-299-3p, miR-34b-5p, miR-30b-3p, miR-466i-5p, miR-202-5p, miR-208b-let-7i-3p, miR-3956-3p, miR-2447, novel\_60, miR-3059-5p, miR-199b-5p, miR-326-3p, miR-423-5p, miR-107-5p, miR-301a-5p, miR-6529b, miR-656-5p, miR-206, miR-499a-5p, miR-320b, miR-652-3p, novel\_69, miR-670-3p, miR-25, miR-7857-3p, miR-2404, miR-129b-5p, miR-216a-3p, miR-199b-5p, novel\_94, miR-2285k, miR-19a-3p, miR-744-3p, miR-23a-3p, miR-382-3p, miR-124a, miR-296-3p, miR-432-3p, miR-326, miR-296-3p, miR-103a-2-5p, miR-125a-5p, miR-199b-5p, miR-378a-5p, miR-26b-3p, miR-31-5p, miR-3431, miR-374b-3p, miR-1a-3p, miR-301b-5p, miR-143-5p, miR-7862, miR-138, miR-1388-5p, miR-145a-3p, miR-4510, miR-6134, miR-3184-5p, miR-206-3p, miR-6525, miR-125b-5p, novel\_63, miR-486b-3p, miR-129-5p, miR-208b-5p, miR-6516-3p, miR-138-5p, miR-296-3p, miR-215-5p, miR-125a, miR-3068-3p, miR-2331-3p, miR-221-5p, miR-199a-5p, miR-204-3p, miR-6130, miR-192-5p, miR-23b, miR-137-3p, miR-424-3p, miR-1827, miR-671-5p, novel\_48, miR-10b-3p, miR-1, miR-216c-5p, miR-2432, miR-199a-5p, miR-486-3p, miR-2424, miR-2285i, miR-376a-5p, miR-125b, miR-196a-3p, miR-221-5p, miR-545-5p, miR-23b-3p, miR-140-3p, miR-330-5p, miR-2904, miR-7134-5p, miR-124-3p, miR-215-5p, miR-1246, miR-2366, novel\_133, miR-378d, miR-133a-3p, miR-128-3p, miR-218-1-3p, miR-19b-3p, miR-142-3p

|        |                   |                                                                                                                                                                                                                                                                                                                                                                                                                                                                                                                                                                                                                                                                                                                                                                                                                                                                                                                                                                                                                                                                                                                                                                                                                                                                            |
|--------|-------------------|----------------------------------------------------------------------------------------------------------------------------------------------------------------------------------------------------------------------------------------------------------------------------------------------------------------------------------------------------------------------------------------------------------------------------------------------------------------------------------------------------------------------------------------------------------------------------------------------------------------------------------------------------------------------------------------------------------------------------------------------------------------------------------------------------------------------------------------------------------------------------------------------------------------------------------------------------------------------------------------------------------------------------------------------------------------------------------------------------------------------------------------------------------------------------------------------------------------------------------------------------------------------------|
| BCAS1  | ENSOARGO(breast c | miR-181b-2-3p, miR-548e-3p, miR-544b, miR-9788-3p, novel_116, miR-496-5p, miR-7859, miR-2285g, miR-140-3p, miR-1290, miR-7b-5p, miR-2300b-3p, miR-544a, miR-668-3p, miR-2424, miR-8485, miR-3187-3p, miR-324-3p, miR-7-5p, miR-30b-3p, miR-2285aa, miR-499b-5p, miR-504-5p, miR-181b-3p, miR-677, miR-544-3p, miR-582-5p, miR-378b, miR-381-3p, miR-150-5p, miR-1827, miR-877-3p, miR-582-5p, miR-335-3p, miR-7144-5p, miR-504, miR-495-3p, miR-374c-5p, miR-877-3p, miR-664a-5p, miR-331-3p, miR-6119-3p                                                                                                                                                                                                                                                                                                                                                                                                                                                                                                                                                                                                                                                                                                                                                                  |
| APP    | ENSOARGO(amyloid  | miR-181a-3p, miR-485-5p, miR-186-5p, miR-19b-2-5p, miR-2366, miR-98-3p, miR-3154, miR-381-3p, miR-3071-5p, miR-153, novel_69, miR-142-3p, novel_116, miR-3960, miR-2285ad, miR-31-5p, miR-660-5p, miR-153-3p, miR-660, miR-2285n, miR-8117, miR-101-3p, miR-19b-1-5p, miR-2957, miR-664a-5p, miR-142a-3p, miR-98-3p, miR-181c-3p, miR-29a-5p, miR-101b-3p<br>miR-29b-1-5p, miR-3065-3p, let-7g, miR-98-5p, let-7f-5p, miR-221-5p, let-7k, miR-618, let-7c-5p, miR-185-3p, miR-505-5p, miR-322-5p, miR-15a-5p, miR-545-5p, miR-18b-5p, let-7d, miR-1961, miR-5703, miR-1197-5p, miR-330-5p, miR-3184-5p, let-7b-5p, let-7b, miR-3074-5p, miR-16-5p, miR-664a, miR-424-5p, let-7f, miR-331-3p, miR-365a-3p, miR-204-3p, novel_32, let-7i-5p, miR-15b-5p, miR-221-5p, miR-3065-3p, miR-18a-5p, miR-1248, miR-488-3p, miR-3154, miR-18a, let-7a-5p, miR-424-5p, let-7e, miR-326, miR-197-5p, miR-29b-1-5p, miR-16b, miR-194a, let-7g-5p, miR-9788-3p, miR-16b, miR-1839-5p, miR-497-5p, miR-296-5p, miR-194-5p, miR-24-3p, miR-326-3p, miR-423-5p, miR-2447, miR-495-3p, miR-194b-5p, miR-4726-5p, miR-203b-5p, miR-2285t, miR-147-5p, miR-15a, miR-16a, let-7i, miR-2404, let-7d-5p, miR-3074-5p, miR-452-3p, novel_94, let-7e-5p, miR-195a-5p, miR-379-5p, miR-18b, miR-2387 |
| SEC31B | ENSOARGO(SEC31 ho |                                                                                                                                                                                                                                                                                                                                                                                                                                                                                                                                                                                                                                                                                                                                                                                                                                                                                                                                                                                                                                                                                                                                                                                                                                                                            |

miR-3074-5p, miR-329-5p, miR-670-3p, miR-505-3p, miR-20a-5p, novel\_1, miR-206, miR-147-5p, miR-665, miR-26b-3p, miR-20b, miR-19b-2-5p, miR-181a-5p, miR-223-3p, miR-1434-3p, miR-3071-5p, miR-2284ab, miR-2284x, miR-101-5p, let-7f-2-3p, let-7f-2-3p, miR-539-3p, miR-345-5p, miR-106a-5p, miR-17-5p, miR-466f-3p, miR-133c, miR-381-3p, miR-30e-5p, miR-93-5p, miR-23b, miR-17-5p, miR-345-5p, miR-329b, novel\_48, miR-20b-5p, miR-3074-1-3p, miR-1248, miR-3607-3p, miR-93, miR-410-5p, miR-2284k, miR-2332, miR-3969, miR-1224-5p, miR-9-5p, miR-1271-5p, miR-545-5p, miR-30a-5p, miR-582-3p, miR-300, miR-155-5p, miR-1, miR-181a-2-3p, miR-4286, miR-2478, miR-1271-3p, miR-205-5p, miR-181b-5p, miR-499b-5p, miR-1185-2-3p, miR-140-5p, miR-381-3p, miR-96-5p, miR-668-5p, miR-335-3p, miR-2284j, miR-9-5p, miR-181d-5p, miR-301a-5p, miR-4726-5p, miR-3964, miR-5010-3p, miR-539-5p, miR-9788-3p, miR-148b-5p, miR-2459, miR-421, miR-126a-5p, miR-1185-3p, miR-301b-5p, miR-1a-3p, miR-106a-5p, miR-23a-3p, miR-2284b, miR-652-5p, miR-33a-5p, miR-199a-3p, miR-2957, miR-106b-5p, miR-487b-5p, miR-1468, miR-221-5p, miR-548o-3p, miR-216b-3p, miR-582-5p, miR-216b-5p, miR-656-3p, miR-155-5p, miR-877-5p, miR-30d-5p, miR-345-5p, miR-543-3p, novel\_99, miR-1827, miR-186-5p, miR-3074-5p, miR-1271, miR-6525, miR-206-3p, miR-122-5p, miR-181c-5p, miR-19b-1-5p, miR-3604, miR-664a-5p, miR-155-5p, miR-6516-3p, miR-4492, miR-1468-5p, miR-548e-3p, miR-106a, miR-1b-3p, miR-3600, miR-505-3p, miR-487a-3p, miR-23b-3p, miR-383-5p, miR-7859, miR-23c, miR-199a-3p, miR-2284h-5p, novel\_133, miR-218-1-3p, miR-148a-5p, miR-329a-5p, miR-2285w, miR-20a, miR-210-5p, miR-2285p, miR-500a-5p, miR-324-3p, miR-106a, miR-30d, miR-221-5p, miR-3653-3p

miR-376b-3p, miR-306b-5p, miR-18b, miR-378f, miR-412-3p, miR-1291, miR-378b, miR-181b-3p, miR-677, miR-6535, miR-2404, miR-485-3p, miR-502-5p, miR-4324, miR-147-5p, miR-22-5p, novel\_1, miR-335-5p, miR-199b-5p, miR-2428, novel\_27, miR-194-5p, miR-145a-5p, miR-22-3p, miR-7b-5p, miR-1434-3p, miR-873a-5p, miR-188-5p, miR-27b-3p, miR-26a-2-3p, miR-16-1-3p, miR-380-3p, miR-339-5p, miR-31-5p, miR-2355-3p, miR-134-3p, miR-503-5p, miR-2411-3p, miR-194a, miR-330-3p, miR-296-3p, miR-7-5p, miR-503-5p, miR-125a-5p, miR-660, miR-483-3p, miR-378a-5p, miR-628-5p, miR-668-3p, miR-6240, miR-296-3p, miR-18a, miR-362-5p, miR-503-3p, miR-671-5p, miR-485-5p, miR-7144-5p, miR-3074-1-3p, miR-23a-5p, novel\_91, miR-10a-3p, miR-10b-3p, miR-125a, miR-2285aa, miR-874-3p, miR-574-5p, miR-199a-5p, miR-223-5p, miR-125b-5p, miR-28-5p, miR-410-3p, novel\_42, miR-378c, miR-500b-5p, miR-23b-5p, miR-345-3p, miR-431, miR-18b-5p, miR-412, novel\_79, miR-429-3p, miR-486-5p, miR-483-3p, miR-2411-5p, miR-378h, miR-181c-3p, miR-339a, miR-217, miR-30c-2-3p, miR-200c, miR-2285af, miR-200c-3p, miR-30a-3p, miR-3064-5p, miR-490-3p, miR-1271-3p, miR-199a-5p, miR-29a-5p, miR-129b-5p, miR-381-3p, miR-199b-5p, miR-140-5p, novel\_94, miR-544-5p, miR-1983, miR-136-5p, miR-147-3p, miR-7689-3p, miR-499b-5p, miR-20a-3p, miR-3064-5p, miR-27a-3p, miR-378e, miR-25, miR-378g, miR-107-5p, miR-371a-5p, miR-2285n, miR-2285t, miR-490-5p, miR-335, miR-3958-3p, miR-194b-5p, miR-6527, miR-2447, miR-3059-5p, miR-7705, novel\_111, miR-877-3p, miR-362-5p, miR-412-3p, miR-2284r, miR-6529a, miR-378b, miR-378c, miR-181b-2-3p, miR-145b, miR-27a-3p, miR-330-3p, miR-2459, miR-9788-3p, miR-455-3p, miR-500-5p, miR-1298-3p, miR-182-5p, miR-505, miR-431-5p, novel\_103, miR-214-3p, miR-103a-2-5p, miR-199b-5p, miR-3955-3p, miR-3085-3p, miR-1185-5p, miR-376b let-

CPSF3      ENSOARGO(cleavage

miR-326-3p, miR-2428, miR-24-3p, miR-193b-3p, miR-335-5p, miR-147-5p, miR-128-1-5p, miR-6119-3p, miR-2284o, miR-16a, novel\_87, miR-15a, miR-6535, miR-669, miR-323a-5p, miR-670-3p, miR-320b, miR-3120-3p, novel\_68, miR-3074-5p, miR-2319a, miR-195a-5p, miR-6395, miR-1291, miR-412-3p, miR-19a-3p, miR-1306, miR-18a-3p, miR-3141, miR-2387, miR-363-5p, miR-6240, miR-106b-3p, miR-193a-3p, miR-126a-3p, miR-124-5p, miR-365b-5p, miR-330-3p, miR-3141, novel\_51, miR-503-5p, miR-149-5p, miR-412-5p, miR-503-5p, miR-134-3p, miR-185-5p, miR-4508, miR-497-5p, miR-2889, miR-744-5p, miR-30b-3p, miR-16b, miR-1260b, miR-450c-3p, miR-3071-5p, miR-1434-3p, miR-365a-5p, miR-1260b, miR-16-5p, miR-103b, novel\_42, miR-486b-3p, miR-767-5p, miR-2433, miR-99b-3p, miR-2355-5p, miR-542-5p, miR-99a-3p, miR-874-3p, miR-7144-5p, miR-671-5p, miR-767, miR-2474, miR-3154, miR-3065-3p, miR-1271-3p, miR-3064-5p, miR-29b-2-5p, miR-2284f, miR-4286, miR-181a-2-3p, novel\_127, novel\_96, miR-1260a, miR-205-5p, miR-450a-1-3p, miR-486-5p, novel\_121, miR-322-5p, miR-6516-5p, miR-222, miR-330-5p, miR-23b-5p, miR-615-3p, miR-423-5p, miR-335, miR-615, miR-4443, miR-378g, miR-7977, miR-3064-5p, miR-10b, miR-1983, miR-147-3p, miR-504, miR-361-3p, miR-221, miR-1388-3p, miR-2330-5p, miR-424-5p, miR-214-3p, miR-3085-3p, miR-491-5p, miR-25-5p, miR-2957, miR-16b, miR-326, miR-1306-5p, miR-221-3p, miR-1298-3p, miR-2300a-5p, miR-1343-3p, miR-330-3p, miR-450b-5p, miR-7857, miR-125b-2-3p, miR-30b-3p, miR-484, miR-296-5p, miR-143-5p, miR-3184-5p, miR-6134, miR-214, miR-665-5p, miR-4510, miR-3074-5p, miR-500, miR-4492, miR-874-5p, miR-424-5p, miR-450b-3p, miR-664a, miR-324-3p, miR-665, miR-29b-2-5p, miR-222-3p, miR-15b-5p, miR-6516, miR-193b-3p, miR-323-5p, miR-6130, miR-3065-3p, miR-296-3p, miR-552-3p, miR-221-5p, miR-2331-3p, miR-504-5p, miR-181c-5p, miR-346, miR-539-5p, miR-129-2-3p, miR-592, novel\_9, miR-125b-5p, miR-3604, miR-2285j, miR-135a-1-3p, miR-204-3p, miR-377-3p, miR-125a, miR-2331-3p, miR-503-3p, miR-876-3p, miR-381-3p, miR-21a-3p, miR-503-3p, miR-2448-3p, miR-380-5p, miR-181b-1-3p, miR-299-3p, miR-181b-5p, miR-125b, miR-125a-3p, miR-545-5p, miR-214-5p, miR-129-1-3p, novel\_121, miR-340-5p, miR-380-5p, miR-299a-3p, miR-300, miR-1296-5p, novel\_101, miR-758-5p, miR-495-3p, miR-181d-5p, miR-2447, miR-212-3p, miR-147-5p, novel\_1, miR-107-5p, miR-669, miR-677, miR-181b-3p, miR-299b-3p, miR-369-5p, miR-140-5p, miR-503-3p, miR-668-3p, miR-380-5p, miR-382-3p, miR-6240, miR-125a-5p, miR-103a-2-5p, miR-378a-5p, miR-330-3p, miR-2957, miR-323b-3p, miR-377-3p, miR-421, miR-185-5p, miR-181b-2-3p, miR-330-3p, miR-409b, miR-323b, miR-296-5p, miR-484, miR-181a-5p

miR-454-3p, miR-129-5p, miR-4492, miR-219b-3p, miR-665, miR-2285j, miR-122-5p, miR-181c-5p, miR-3958-5p, miR-214, miR-665-5p, miR-3074-5p, miR-129-2-3p, miR-625-5p, miR-543-3p, miR-1827, miR-186-5p, miR-339b, miR-345-5p, miR-129b-3p, miR-411, miR-433-3p, miR-30d-5p, miR-151b, miR-15b-5p, miR-377-3p, miR-301a-3p, miR-296-3p, miR-504-5p, miR-219b-5p, miR-324-3p, miR-3601, miR-500a-5p, miR-92a-1-5p, miR-486-3p, miR-143-3p, miR-376a-5p, miR-181b-1-3p, miR-142a-3p, miR-34a-5p, miR-328-3p, miR-18a-3p, miR-490-5p, miR-628-3p, miR-3968, miR-301a-5p, novel\_82, miR-2440, miR-101-3p, miR-1285-5p, miR-7705, miR-877-3p, miR-2447, miR-3956-3p, miR-1983, miR-504, miR-136-5p, miR-1306-3p, miR-144-5p, miR-203-3p, miR-4443, miR-378g, miR-7689-3p, miR-139-5p, miR-24-1-5p, miR-4792, miR-214-3p, miR-130b-3p, miR-16b, miR-199a-3p, miR-101c, miR-1388-5p, miR-758-3p, miR-2284r, miR-1298-5p, miR-541, miR-301b-5p, miR-148b-5p, miR-455-3p, miR-2459, miR-1298-3p, miR-181b-2-3p, miR-145b, miR-330-3p, miR-125b-5p, miR-2433, miR-1197-3p, miR-193a-5p, miR-16-5p, miR-144-5p, novel\_42, miR-1248, miR-876-3p, miR-2318, miR-345-5p, miR-30e-5p, miR-424-3p, miR-1271, miR-125a, miR-574-5p, miR-874-3p, miR-3068-3p, novel\_127, miR-127-5p, miR-205-5p, miR-219-3p, miR-200a, miR-1343-5p, miR-1290, miR-129-1-3p, miR-322-5p, miR-758-5p, miR-1224-5p, novel\_79, miR-299a-3p, miR-429-3p, miR-421-5p, miR-29a, miR-485-3p, miR-1247-3p, miR-28c, miR-301b-3p, miR-2284w, miR-29c-3p, miR-335-5p, miR-410-5p, miR-412-3p, miR-3970, miR-3065-5p, miR-6535, miR-677, miR-669, miR-181b-3p, miR-374c-3p, novel\_69, miR-299b-3p, miR-3120-3p, novel\_68, miR-3074-5p, miR-378a-5p, miR-365b-5p, miR-296-3p, miR-377-3p, miR-503-3p, miR-628-5p, miR-6240, miR-497-5p, miR-16b, miR-22-3p, miR-431-3p, miR-708-3p, miR-432, miR-222-3p, miR-542-3p, miR-1843b-5p, novel\_116, miR-149-5p, miR-novel\_51, miR-1306-5p, miR-17-3p, miR-378a-5p, miR-2284m, miR-2284b, miR-329a-5p, miR-29a-5p, miR-2284y, miR-148b-5p, miR-125b-2-3p, novel\_23, miR-3071-5p, miR-2284aa, miR-2284u, miR-148a-5p, miR-2284ab, miR-2300a-5p, miR-148b-5p, miR-2284z, miR-421, miR-1185-3p, miR-2284d, miR-2284k, miR-17-3p, miR-487b-5p, miR-2284j, miR-17-3p, miR-2284v, miR-1306, miR-487b-5p, miR-505-3p, miR-2331-3p, miR-2284g, miR-329-5p, miR-4443, miR-2284n, miR-1185-2-3p

GSTA4

ENSOARGO(glutathione)

CAPN2

ENSOARGO(calpain)



PHF20 ENSOARGO(C PHD fing

let-7b-3p, miR-29b-2-5p, miR-320e, miR-19b-1-5p, miR-6516-3p, miR-424-5p, miR-145a-3p, miR-214, miR-224-5p, miR-10b-5p, miR-6134, miR-339b, miR-30c-1-3p, miR-504-5p, miR-370-5p, miR-377-3p, miR-10a, miR-877-5p, miR-15b-5p, novel\_25, miR-3601, miR-345-3p, miR-369-3p, miR-29b-1-5p, miR-376a-5p, miR-2432, miR-376a-5p, miR-5703, miR-188-3p, miR-1197-5p, miR-19b-3p, miR-3600, miR-15a-5p, miR-383-5p, miR-616-3p, miR-218-5p, miR-2285y, miR-628-3p, miR-3958-3p, miR-3968, miR-2284q, miR-2285t, miR-452-5p, miR-6527, miR-219a-2-3p, miR-1285-5p, miR-361-3p, miR-129b-5p, miR-136-5p, miR-504, miR-376a-3p, miR-10b, miR-211-5p, miR-376d, miR-27a-3p, miR-16b, miR-29b-1-5p, miR-214-3p, miR-424-5p, miR-30c-1-3p, miR-758-3p, miR-3187-3p, miR-10b, miR-758-3p, miR-450b-5p, miR-3120-5p, miR-330-3p, miR-27a-3p, miR-376b-3p, miR-370-5p, miR-34c-3p, miR-204-5p, miR-410-3p, miR-16-5p, miR-323-3p, miR-145-3p, miR-3154, miR-23a-5p, miR-874-3p, miR-1271, miR-370-3p, miR-300-3p, miR-219-3p, miR-376b-3p, miR-339a, miR-30c-2-3p, miR-127-5p, miR-107, miR-3529-3p, miR-29b-2-5p, miR-2427, miR-10a-5p, miR-2285ad, miR-7641, novel\_79, miR-483-3p, miR-322-5p, miR-142b, miR-15a, miR-16a, novel\_1, miR-1193, miR-371b-3p, miR-211, novel\_27, miR-376b-3p, miR-3065-5p, miR-19a-3p, miR-107, miR-195a-5p, novel\_68, miR-10a-5p, miR-7-1-3p, miR-670-3p, miR-224-5p, novel\_51, miR-330-3p, miR-197-5p, miR-483-3p, miR-6240, miR-628-5p, miR-2113, miR-19b-2-5p, novel\_23, miR-16b, miR-27b-3p, miR-497-5p, miR-103a-3p, miR-339-5p, miR-2285g, miR-103

miR-543-5p, novel\_96, miR-2385-3p, miR-199a-5p, miR-345-3p, miR-1290, miR-105-2, miR-155-5p, miR-496, miR-2285ad, miR-7641, miR-322-5p, miR-410-5p, miR-135a-1-3p, miR-135a-5p, miR-409-3p, novel\_9, miR-204-5p, miR-16-5p, miR-133a-3p, miR-23b, novel\_48, miR-7144-5p, miR-1248, miR-503-3p, miR-374c-3p, miR-3959-5p, miR-199a-5p, miR-296-3p, miR-377-3p, miR-105-5p, miR-2411-3p, miR-378a-5p, miR-130b-5p, miR-101-5p, let-7f-2-3p, let-7f-2-3p, miR-654-3p, miR-432-3p, miR-296-3p, miR-503-3p, miR-432, miR-145a-5p, miR-3071-5p, miR-374b-3p, miR-16b, miR-497-5p, miR-2285g, miR-432-5p, miR-149-5p, miR-2355-3p, miR-15a, miR-6529b, miR-16a, miR-22-5p, miR-335-5p, miR-211, miR-323c, miR-24-3p, miR-2284w, miR-199b-5p, miR-1306, miR-378b, miR-2319a, miR-135b-5p, miR-195a-5p, miR-6516-3p, novel\_68, miR-216b-3p, miR-655-5p, miR-323a-5p, miR-374c-3p, miR-210-5p, miR-618, miR-219b-5p, miR-345-3p, miR-466i-5p, miR-2424, miR-1246, miR-140-3p, miR-5703, miR-548e-3p, miR-3600, miR-7859, miR-23b-3p, miR-23c, miR-15a-5p, miR-199a-3p, miR-338-5p, novel\_74, miR-6516-3p, miR-155-5p, miR-424-5p, miR-130b-5p, miR-539-5p, miR-214, miR-2330-3p, miR-3184-5p, miR-338-3p, miR-2285c, miR-433-3p, miR-133b-3p, miR-1827, novel\_99, miR-496-3p, miR-182-5p, miR-296-3p, miR-532-5p, miR-377-3p, miR-323-5p, miR-15b-5p, miR-155-5p, miR-199a-3p, miR-1306-5p, miR-16b, miR-182-5p, miR-491-5p, miR-199b-5p, miR-103a-2-5p, miR-214-3p, miR-1388-3p, miR-424-5p, miR-23a-3p, miR-33a-5p, miR-484, miR-541, miR-101a-5p, miR-21b, miR-101c, miR-105-1, novel\_4, miR-145b, miR-1298-3p, miR-147a, miR-2285e, miR-1185-3p, miR-2285n, miR-218-5p, miR-107-5p, miR-499a-5p, miR-3968, miR-335, novel\_60, miR-3059-5p, miR-3956-3p, miR-541-3p, miR-8095, miR-423-5p, miR-154a, miR-199b-5p, miR-877-3p, novel\_94, miR-20a-3p, miR-541-5p, miR-211-5p, miR-2182-3p, miR-1185-2-3p, miR-1285, miR-125b-2-3p, novel\_23, miR-194-5p, miR-450b-5p, miR-380-3p, miR-2284ab, miR-188-5p, novel\_4, miR-377-5p, miR-130a-3p, miR-2284d, novel\_116, miR-221-3p, miR-500-5p, miR-320b, miR-182-5p, miR-194a, miR-105-5p, miR-2957, miR-130b-3p, miR-3085-3p, miR-193a-3p, miR-466f-3p, miR-382-3p, miR-130b-5p, miR-376b, miR-2284l, miR-503-3p, miR-221, miR-2285ab, miR-376b-3p, miR-3970, miR-19a-3p, miR-96-5p, miR-9-3p, miR-6395, miR-329-5p, miR-3064-5p, miR-3120-3p, miR-211-5p, miR-670-3p, miR-203-3p, miR-320c, miR-6402, miR-485-3p, miR-335, miR-499a-5p, miR-335-5p, miR-194b-5p, miR-495-3p, miR-193b-3p, miR-2285f, miR-362-5p, miR-877-3p, miR-211, miR-301b-3p, miR-154a, miR-2300b-3p, miR-5703, miR-19b-3p, miR-582-3p, miR-4429, miR-200b-3p, miR-429-3p, miR-222, miR-212-5p, miR-1271-5p, miR-200b, miR-328-3p, miR-200c, miR-2285p, miR-6119-5p, miR-2285af, miR-200c-3p, miR-202-5p, miR-320d, miR-221-5p, miR-1277-5p, miR-3064-5p, miR-377-5p, miR-380-3p, miR-490-3p, miR-2285b, miR-29a-5p, miR-488-3p, miR-362-5p, miR-487b-5p, miR-320a, miR-2312, miR-221-5p, miR-182-5p, miR-193b-3p, miR-301a-3p, miR-494-5p, miR-34c-3p, miR-222-3p, miR-2285j, miR-3969, miR-26c, miR-487b-5p, miR-204-5p, miR-130b-5p, miR-487a-5p, miR-454-3p, miR-2284v, miR-1271, miR-6128, miR-1197-3p

miR-382, miR-101-5p, miR-34b-5p, miR-190a, miR-197-5p, miR-455-5p, miR-125a-5p, miR-466f-3p, miR-133b-5p, miR-103, miR-432-5p, miR-2284d, miR-185-5p, miR-145a-5p, miR-181a-5p, miR-744-5p, miR-455-5p, miR-21-5p, miR-2284ab, miR-17-3p, novel\_101, miR-449a, miR-326-3p, miR-24-3p, miR-34c, miR-16a, miR-382-5p, miR-15a, miR-6529b, miR-656-5p, miR-199c, miR-128-1-5p, novel\_1, miR-378b, miR-2404, miR-34b, miR-376b-3p, miR-6516-3p, miR-505-3p, miR-195a-5p, miR-379-5p, miR-107, miR-2285k, miR-30a-3p, miR-495-5p, miR-181a-2-3p, miR-2403, miR-3529-3p, miR-1957a, miR-380-5p, miR-376b-3p, miR-200c, miR-107, miR-17-3p, miR-200c-3p, miR-181b-5p, miR-582-3p, miR-545-5p, miR-214-5p, miR-24-2-5p, miR-345-3p, miR-200b-3p, let-7a-2-3p, miR-133a-3p, miR-365a-5p, miR-323-3p, miR-500b-5p, miR-2903, miR-331-3p, miR-99b-3p, miR-5100, miR-135a-1-3p, miR-486b-3p, miR-28-5p, miR-3957-5p, miR-3957, miR-154b-5p, miR-2284n, miR-34c-5p, miR-362-5p, miR-2448-3p, miR-503-3p, miR-3074-1-3p, miR-7144-5p, miR-485-5p, miR-1814c, let-7g-3p, miR-2330-5p, miR-424-5p, miR-3187-3p, miR-4532, miR-2957, miR-362-3p, novel\_115, miR-5126, miR-326, novel\_124, miR-3955-3p, novel\_4, miR-500-5p, miR-9788-3p, miR-484, miR-296-5p, miR-2284aa, miR-299a-5p, miR-1296-5p, miR-181d-5p, miR-541-3p, miR-362-5p, miR-2285t, miR-335, miR-7977, miR-376d, miR-216c-5p, miR-29b-1-5p, miR-125b, miR-30b-3p, miR-34b-5p, miR-21-3p, miR-2284m, miR-505-3p, miR-3960, miR-199a-3p, novel\_83, miR-200b, miR-15a-5p, miR-2904, miR-5703, miR-188-3p, novel\_133, miR-362-3p, miR-2300b-3p, miR-539-5p, miR-4510, miR-708-5p, miR-424-5p, miR-450b-3p, miR-17-3p, miR-6516-3p, miR-21-3p, miR-532-5p, miR-204-3p, miR-6130, miR-139-5p, miR-21a-3p, let-7g-3p, miR-133b-3p, miR-668-3p, miR-380-5p, let-7a-2-3p, miR-432-3p, miR-432-3p, miR-365b-5p, miR-2411-3p, miR-7-5p, miR-31-5p, miR-103a-3p, miR-104-3p, miR-374b-3p, miR-181c-3p, miR-200a-5p, miR-142-3p, miR-767-5p, miR-767, miR-219b-3p, novel\_101, miR-216b-3p, miR-142-3p, miR-374c-3p, miR-142a-3p, miR-670-3p, miR-2411-5p, miR-2411

CYP24A1 ENSOARGO0 cytochrome  
JADE1 ENSOARGO0 jade fam

miR-874-3p, miR-235b-5p, miR-769, miR-199a-5p, miR-30e-5p, miR-3154, miR-320a, miR-767, miR-329b, miR-345-5p, miR-7144-5p, miR-485-5p, miR-323-3p, miR-410-5p, miR-6740-5p, miR-767-5p, miR-486b-3p, miR-429-3p, miR-7641, miR-1271-5p, miR-196a-5p, miR-30a-5p, miR-105-2, miR-30c, miR-200b-3p, miR-3529-3p, miR-181a-2-3p, miR-199a-5p, miR-29a-5p, miR-205-5p, miR-200c, miR-125a-3p, miR-30c-2-3p, miR-450a-2-3p, miR-200c-3p, novel\_127, miR-329-5p, miR-320b, miR-677, miR-181b-3p, miR-376b-5p, miR-3970, miR-3065-5p, miR-378b, miR-18a-3p, miR-9851-3p, miR-6516-3p, miR-495-3p, novel\_101, miR-2428, miR-199b-5p, miR-382-5p, miR-203b-5p, miR-31-5p, miR-665, miR-377-5p, miR-3535, miR-653, miR-1843b-5p, miR-145a-5p, miR-30b-3p, miR-219a-1-3p, miR-188-5p, miR-2284x, miR-130b-5p, miR-432-3p, miR-2284l, miR-432-3p, miR-345-5p, miR-503-3p, miR-224-5p, miR-377-3p, miR-105-5p, miR-196b-5p, miR-2285l, miR-140-5p, miR-30c-1-3p, miR-296-3p, miR-377-3p, miR-129b-3p, miR-30d-5p, miR-345-5p, miR-30f, novel\_99, miR-1271, miR-769-5p, miR-6525, miR-224-5p, miR-2285j, miR-338-5p, miR-665, miR-451a, miR-664a, miR-6516-3p, miR-129-5p, miR-669a-3p, miR-130b-5p, miR-18a-3p, miR-383-5p, miR-200b, miR-222-5p, miR-199a-3p, miR-30c-5p, miR-2366, miR-124-3p, miR-5703, miR-4429, miR-361-5p, miR-329a-5p, miR-377-5p, miR-142a-3p, miR-181b-1-3p, miR-486-3p, miR-143-3p, miR-30b, miR-210-5p, novel\_17, miR-219b-5p, miR-92a-1-5p, miR-30d, miR-21-3p, miR-2285u, miR-3082-5p, miR-489, miR-2483-3p, miR-140-5p, miR-199b-5p, miR-96-5p, miR-668-5p, miR-335-3p, miR-9-3p, miR-3059-5p, miR-877-3p, miR-2285n, novel\_82, miR-30b-5p, miR-769-5p, miR-105-1, miR-145b, miR-181b-2-3p, miR-222-5p, miR-142-3p, miR-9788-3p, miR-455-3p, miR-4791, miR-7857, miR-323b, miR-30b-3p, miR-1388-5p, miR-2426, miR-124a, miR-30c-1-3p, miR-100a-3p, miR-320b, miR-323b-3p, miR-499b-5p, miR-1290, miR-2310

SLC22A5 ENSOARGOC solute c: miR-140-5p, miR-30c-1-3p, miR-296-3p, miR-377-3p, miR-129b-3p, miR-30d-5p, miR-345-5p, miR-30f, novel\_99, miR-1271, miR-769-5p, miR-6525, miR-224-5p, miR-2285j, miR-338-5p, miR-665, miR-451a, miR-664a, miR-6516-3p, miR-129-5p, miR-669a-3p, miR-130b-5p, miR-18a-3p, miR-383-5p, miR-200b, miR-222-5p, miR-199a-3p, miR-30c-5p, miR-2366, miR-124-3p, miR-5703, miR-4429, miR-361-5p, miR-329a-5p, miR-377-5p, miR-142a-3p, miR-181b-1-3p, miR-486-3p, miR-143-3p, miR-30b, miR-210-5p, novel\_17, miR-219b-5p, miR-92a-1-5p, miR-30d, miR-21-3p, miR-2285u, miR-3082-5p, miR-489, miR-2483-3p, miR-140-5p, miR-199b-5p, miR-96-5p, miR-668-5p, miR-335-3p, miR-9-3p, miR-3059-5p, miR-877-3p, miR-2285n, novel\_82, miR-30b-5p, miR-769-5p, miR-105-1, miR-145b, miR-181b-2-3p, miR-222-5p, miR-142-3p, miR-9788-3p, miR-455-3p, miR-4791, miR-7857, miR-323b, miR-30b-3p, miR-1388-5p, miR-2426, miR-124a, miR-30c-1-3p, miR-100a-3p, miR-320b, miR-323b-3p, miR-499b-5p, miR-1290, miR-2310

KRT26 ENSOARGOC keratin : miR-499b-5p, miR-1290, miR-2310

miR-542-5p, miR-324-3p, miR-422a, miR-18b-3p, miR-30b-3p, miR-299-3p, miR-216c-5p, miR-29b-1-5p, miR-146a-5p, miR-143-3p, miR-378i, miR-2408, miR-124-3p, miR-378a-3p, miR-664-5p, miR-378d, miR-18a-3p, miR-548e-3p, miR-7859, miR-15a-5p, miR-532-3p, miR-328-3p, miR-665, miR-450b-3p, miR-664a, miR-17-3p, miR-155-5p, miR-874-5p, miR-4492, miR-424-5p, miR-130b-5p, miR-378c, miR-3074-5p, miR-4510, miR-665-5p, miR-214, miR-3074-2-3p, miR-769-5p, miR-21a-3p, miR-450a-1-3p, miR-339b, miR-543-3p, miR-1827, miR-2331-3p, miR-504-5p, miR-378a-3p, miR-216b-3p, miR-3065-3p, miR-544-3p, miR-377-3p, miR-6130, miR-204-3p, miR-155-5p, miR-15b-5p, miR-877-5p, miR-1306-5p, miR-29b-1-5p, miR-16b, miR-3085-3p, miR-146b, miR-214-3p, miR-542-5p, miR-1388-3p, miR-124a, miR-424-5p, miR-378d, miR-378b, miR-6529a, miR-143-5p, miR-412-3p, miR-30b-3p, miR-378c, miR-544a, miR-101a-5p, miR-1343-3p, novel\_4, miR-2300a-5p, miR-409b, miR-330-3p, miR-425-3p, miR-500-5p, miR-769-5p, miR-3968, miR-2285t, miR-2447, miR-3059-5p, miR-212-3p, miR-362-5p, miR-1285-5p, miR-378j, miR-504, miR-1983, novel\_94, miR-3064-5p, miR-452-3p, miR-7977, miR-211-5p, miR-378e, miR-4443, miR-1260a, miR-339a, miR-17-3p, miR-2898, novel\_127, miR-3064-5p, miR-4286, miR-2403, novel\_39, miR-3065-3p, miR-1271-3p, miR-490-3p, miR-196a-5p, miR-29d-3p, miR-155-5p, miR-299a-3p, novel\_79, miR-1224-5p, miR-412, miR-322-5p, miR-378h, miR-450a-1-3p, novel\_121, miR-29b-3p, miR-551b-3p, miR-138-5p, miR-204-5p, miR-1306-5p, novel\_42, miR-6128, miR-16-5p, miR-3607-3p, miR-103b, miR-500b-5p, miR-1260b, miR-1197-3p, miR-378c, miR-362-5p, miR-7144-5p, miR-485-5p, miR-874-3p, miR-769, miR-377-3p, miR-296-3p, miR-146a, miR-330-3p, miR-197-5p, novel\_51, miR-124-5p, miR-196b-5p, miR-452-5p, miR-130b-5p, miR-6240, miR-101-5p, miR-362-5p, miR-296-3p, miR-873a, miR-615, miR-101-3p, miR-2440, miR-664a-5p, miR-3085-3p, miR-590-3p, miR-101b-3p, miR-3064-5p, miR-432-3p, miR-345-5p, miR-615-3p, miR-3578, miR-542-3p, miR-381-3p, miR-345-5p, miR-345-5p, miR-140-5p, miR-139-5p, miR-3064-5p, miR-2319b, miR-147a, miR-139-5p

EEF1G ENSOARGO(eukaryot

ZFAND3 ENSOARGO(zinc fin

|          |                    |                                                                                                                                                                                                                                                                                                                                                                                                                                                                                                                                                                                                                                                                                                                                                                                                                                                                                                                                                                                                                                                                                                                                   |
|----------|--------------------|-----------------------------------------------------------------------------------------------------------------------------------------------------------------------------------------------------------------------------------------------------------------------------------------------------------------------------------------------------------------------------------------------------------------------------------------------------------------------------------------------------------------------------------------------------------------------------------------------------------------------------------------------------------------------------------------------------------------------------------------------------------------------------------------------------------------------------------------------------------------------------------------------------------------------------------------------------------------------------------------------------------------------------------------------------------------------------------------------------------------------------------|
|          |                    | miR-365b-5p, miR-320b, miR-199b-5p, miR-2284b, miR-33a-5p, miR-382-3p, miR-2330-5p, miR-193a, miR-378d, miR-197-3p, miR-412-3p, miR-708-3p, miR-378b, miR-1285, miR-2284aa, miR-2284x, miR-378c, miR-450b-5p, miR-5010-3p, miR-2285e, miR-1185-3p, miR-2285g, miR-539-5p, miR-2285n, miR-2285x, miR-9-3p, miR-199b-5p, miR-361-3p, miR-199b-5p, miR-335-3p, miR-378f, miR-9-3p, miR-181a-3p, miR-2285u, miR-2284g, miR-20a-3p, miR-10b, miR-320c, miR-144-3p, miR-1185-2-3p, miR-378e, novel_69, miR-299b-3p, miR-489, miR-185-3p, miR-181c-3p, miR-422a, miR-299-3p, miR-21-3p, miR-2484, miR-320d, miR-2284m, miR-450a-2-3p, miR-199a-5p, miR-2284y, miR-2284a, miR-1271-3p, miR-376a-5p, miR-140-3p, miR-378a-3p, miR-378i, miR-664-5p, miR-582-3p, miR-4429, miR-33b-3p, miR-412, miR-299a-3p, miR-548e-3p, miR-2285ad, miR-6517, miR-2284z, miR-545-5p, miR-302a-5p, miR-7859, miR-6516-5p, miR-378h, miR-144, miR-2284k, novel_74, miR-378c, miR-365a-5p, miR-181c-3p, miR-378c, miR-6525, miR-320a, miR-2285c, miR-543-3p, novel_48, miR-10b-3p, miR-216b-3p, miR-2331-3p, miR-378a-3p, miR-3068-3p, miR-199a-5p, miR-6516 |
| ZPBP     | ENSOARGO(zona pel  |                                                                                                                                                                                                                                                                                                                                                                                                                                                                                                                                                                                                                                                                                                                                                                                                                                                                                                                                                                                                                                                                                                                                   |
| ADAM17   | ENSOARGO(ADAM met. | miR-150-5p, miR-224-5p, miR-2440, miR-301, miR-16-1-3p, miR-16-1-3p, miR-2426, miR-338-3p, miR-224-5p                                                                                                                                                                                                                                                                                                                                                                                                                                                                                                                                                                                                                                                                                                                                                                                                                                                                                                                                                                                                                             |
| IFIT1    | ENSOARGO(interfer  | miR-376a-5p, miR-450a-1-3p, miR-655, miR-3970, miR-450c-3p, miR-876-3p, miR-140-5p, miR-483-3p, miR-450a-1-3p, miR-224-5p, miR-29b-2-5p, miR-655-3p, miR-450b-3p, miR-483-3p, miR-374b-3p, miR-21-3p, miR-374a-3p, miR-371b-3p, miR-374a-3p, miR-224-5p, miR-376a-5p, miR-1285-5p                                                                                                                                                                                                                                                                                                                                                                                                                                                                                                                                                                                                                                                                                                                                                                                                                                                 |
| DYNC1LI1 | ENSOARGO(dynein,   | miR-655, miR-1306, miR-135b-5p, miR-211-5p, miR-32-3p, miR-365a-3p, miR-34b, miR-3596, miR-34c-5p, miR-33a-3p, miR-655-3p, miR-34c, miR-5100, miR-204-5p, miR-490-5p, miR-212-3p, miR-32-3p, miR-449a, miR-211, miR-5703, miR-1246, miR-1285, miR-432, miR-34a-5p, miR-105-2, miR-105-1, miR-147a, miR-432-5p, miR-105-5p, miR-1306-5p, miR-34b-5p, miR-628-5p, miR-491-3p, miR-2285b, miR-8485, miR-130a-5p, miR-125b-2-3p, miR-2478                                                                                                                                                                                                                                                                                                                                                                                                                                                                                                                                                                                                                                                                                             |
| ASTN1    | ENSOARGO(astrotac  | miR-363, novel_68, miR-7977, miR-4443, miR-320c, miR-2387, miR-379-5p, miR-2285x, miR-1296-5p, miR-877-3p, miR-154a, miR-502-5p, miR-371a-5p, miR-22-5p, miR-151a-3p, miR-548w, miR-330-3p, miR-26b-3p, miR-339-5p, miR-3431, miR-544b, miR-9788-3p, miR-148b-5p, miR-1843b-5p, miR-708-3p, miR-16-1-3p, miR-544a, miR-1388-5p, miR-1839-5p, miR-6240, miR-744-3p, miR-345-5p, miR-320b, miR-365b-5p, miR-330-3p, miR-29b-1-5p, miR-221-5p, miR-552-3p, miR-2355-5p, miR-544-3p, miR-503-3p, miR-320a, miR-329b, miR-339b, miR-345-5p, miR-345-5p, miR-10b-3p, miR-485-5p, miR-625-5p, miR-539-5p, miR-193a-5p, miR-1197-3p, miR-338-3p, miR-365a-5p, miR-3969, miR-665, miR-664a-5p, miR-151-3p, novel_9, miR-6517, novel_79, miR-7641, miR-2366, miR-5703, miR-4429, miR-148a-5p, miR-378d, miR-16-1-3p, miR-148b-5p, miR-29b-1-5p, miR-1271-3p, novel_39, miR-29a-5p, novel_17, miR-2285af, miR-339a, miR-466i-5p, miR-2898, miR-320d, miR-221-5p                                                                                                                                                                              |

miR-24-2-5p, miR-505-5p, miR-6516-5p, miR-7641, novel\_79, miR-2285ad, miR-299a-3p, miR-429-3p, miR-200b-3p, miR-10a-5p, miR-29a-5p, miR-490-3p, miR-450c-5p, miR-1271-3p, miR-24-2-5p, miR-92b-3p, miR-2385-3p, miR-29b-2-5p, miR-4286, miR-92a-3p, miR-450a-2-3p, miR-17-3p, miR-181b-5p, miR-1a-2-5p, miR-200c-3p, miR-3071-3p, miR-339a, miR-1260a, miR-200c, miR-331-5p, miR-25-3p, miR-370-3p, miR-215-5p, miR-1271, miR-125a, miR-7144-5p, miR-3074-1-3p, miR-376c-5p, miR-1814c, miR-329a, miR-2318, miR-137-3p, miR-376c-5p, miR-301, miR-145-3p, miR-365a-5p, miR-1260b, miR-103b, miR-1306-5p, miR-204-5p, miR-125b-5p, miR-26c, miR-6740-5p, miR-409-3p, miR-1-5p, miR-5100, miR-544b, miR-412-5p, miR-3431, miR-339-5p, miR-3955-5p, miR-27b-3p, miR-188-5p, miR-1260b, miR-3071-5p, novel\_23, miR-145a-5p, miR-2113, miR-1285, miR-296-3p, miR-654-3p, miR-432-3p, miR-22841, miR-432-3p, miR-382, miR-668-3p, let-7f-2-3p, let-7f-2-3p, miR-125a-5p, miR-378a-5p, miR-365b-5p, miR-32, miR-3141, novel\_51, miR-224-5p, miR-296-3p, miR-377-3p, miR-146b-3p, miR-411b-3p, miR-670-3p, miR-299b-3p, miR-655-5p, miR-26b-5p, miR-10a-5p, miR-2319a, miR-6395, miR-505-3p, miR-1291, miR-410-5p, miR-412-3p, miR-1306, miR-378b, miR-376b-5p, miR-3141, miR-2387, novel\_27, miR-211, miR-495-3p, miR-17-3p, miR-1a-1-5p, miR-656-5p, miR-22-5p, miR-147-5p, miR-92a-3p, novel\_1, miR-382-5p, miR-502-5p, miR-142b, miR-576-3p, miR-328-3p, miR-487a-3p, miR-200b, miR-340-5p, miR-3600, miR-485-3p, miR-30d-3p, miR-212-5p, miR-505-3p, miR-361-5p, miR-2904, miR-1434-5p, miR-1197-5p, miR-188-3p, novel\_133, miR-215-5p, miR-362-3p, miR-2424, miR-29b-1-5p, miR-376a-5p, miR-195a-3p, miR-345-3p, miR-221-5p, miR-299-3p, miR-216a-5p, miR-324-3p, miR-92a-1-5p, miR-125b, miR-185-3p, miR-26a-5p, miR-618, novel\_32, novel\_25, miR-6516, miR-544-3p, miR-10a, miR-192-5p, miR-377-3p, miR-216b-5p, miR-532-

miR-16b, miR-497-5p, miR-432, miR-1843b-5p, miR-223-3p, miR-3535, miR-3431, miR-149-5p, miR-3955-5p, miR-378a-5p, miR-483-3p, miR-193a-3p, miR-582, miR-377-3p, miR-365b-5p, novel\_51, miR-194a, miR-2411-3p, miR-2284l, miR-503-3p, miR-380-5p, miR-6240, miR-668-3p, miR-410-5p, miR-412-3p, miR-3970, miR-150-5p, miR-216a-3p, miR-3591-3p, miR-374c-3p, novel\_69, miR-677, miR-6535, miR-181b-3p, miR-3120-3p, miR-142b, miR-485-3p, miR-2284w, miR-335-5p, miR-193b-3p, miR-3591-5p, miR-1343-5p, miR-330-5p, miR-322-5p, miR-758-5p, miR-2285ad, miR-429-3p, miR-412, miR-18b-5p, miR-125a-3p, miR-450b-5p, miR-200a, novel\_39, miR-2284y, miR-192-3p, miR-3064-5p, miR-20b-5p, miR-30e-5p, miR-331-5p, miR-93-5p, miR-300-3p, miR-223-5p, miR-574-5p, miR-1271, miR-331-5p, miR-1260b, miR-1197-3p, miR-16-5p, miR-193a-5p, miR-1839-5p, miR-2284r, miR-541, miR-455-3p, miR-148b-5p, miR-1343-3p, miR-330-3p, miR-181b-2-3p, miR-1185-5p, miR-487b-5p, miR-214-3p, miR-103a-2-5p, miR-29b-1-5p, miR-106b-5p, miR-16b, miR-1983, miR-140-5p, miR-3596, miR-2483-3p, miR-4792, miR-2284g, miR-211-5p, miR-490-5p, miR-218-5p, miR-361-3p, miR-877-3p, novel\_111, miR-423-5p, miR-2447, miR-885-5p, miR-3956-3p, miR-493-3p, miR-133a-3p, miR-2284u, miR-148a-5p, miR-30c-5p, miR-193b-5p, miR-217-5p, miR-7859, miR-106a, miR-2484, miR-30b, miR-210-5p, miR-92a-1-5p, miR-345-3p, miR-376a-5p, miR-2285i, miR-181b-1-3p, miR-143-3p, miR-195a-3p, miR-345-3p, miR-625-5p, miR-1827, miR-186-5p, miR-299, miR-129b-3p, miR-500a-3p, miR-30d-5p, miR-377-3p, miR-10a, miR-15b-5p, miR-2331-3p, miR-548o-3p, miR-216b-3p, miR-552-3p, miR-296-3p, miR-500, miR-874-5p, miR-4492, miR-3184-5p, miR-3184-3p, miR-3958-5p, miR-214, miR-138, miR-1260b, miR-873a-5p, miR-653, miR-1285, miR-1434-3p, miR-194-5p, miR-432-5p, miR-90b, miR-133b-5p, miR-124-5p, miR-452-5p, miR-1343-5p, miR-



|       |                   |                                                                                                                                                                                                                                                                                                                                                                                                                                                                                                                                                                                                                                                                                                                                                                                                                                                                                                                                                                                                                                                                                                                                                                                                                                                                                                                                                                                                                                                                                                                                                                          |
|-------|-------------------|--------------------------------------------------------------------------------------------------------------------------------------------------------------------------------------------------------------------------------------------------------------------------------------------------------------------------------------------------------------------------------------------------------------------------------------------------------------------------------------------------------------------------------------------------------------------------------------------------------------------------------------------------------------------------------------------------------------------------------------------------------------------------------------------------------------------------------------------------------------------------------------------------------------------------------------------------------------------------------------------------------------------------------------------------------------------------------------------------------------------------------------------------------------------------------------------------------------------------------------------------------------------------------------------------------------------------------------------------------------------------------------------------------------------------------------------------------------------------------------------------------------------------------------------------------------------------|
|       |                   | miR-885-3p, novel_25, miR-151b, miR-15b-5p, miR-132-5p, miR-193b-3p, miR-3065-3p, miR-424-5p, miR-129-5p, miR-29b-2-5p, miR-122-5p, miR-3184-5p, miR-378d, miR-142-3p, miR-140-3p, miR-1197-5p, miR-2366, miR-532-3p, miR-151-5p, miR-328-3p, miR-383-5p, miR-15a-5p, miR-18a-3p, miR-125b, miR-92a-1-5p, miR-185-3p, miR-2432, miR-486-3p, miR-29b-1-5p, miR-377-5p, miR-10a-3p, miR-503-5p, miR-361-3p, miR-7857-3p, miR-3064-5p, miR-2319b, miR-7134-3p, miR-2440, miR-423-5p, miR-541-3p, miR-450b-5p, miR-30b-3p, miR-541, miR-143-5p, novel_124, miR-3085-3p, miR-2957, miR-29b-1-5p, novel_19, miR-16b, miR-5126, novel_103, miR-2310, miR-491-3p, miR-424-5p, miR-671-5p, miR-767, miR-10a-3p, miR-542-5p, miR-141-3p, miR-125a, miR-874-3p, miR-3432a, miR-486b-3p, miR-134-5p, novel_9, miR-767-5p, miR-125b-5p, miR-29b-3p, miR-1260b, miR-16-5p, miR-885-3p, miR-1343-5p, miR-29d-3p, miR-134, miR-134-5p, miR-322-5p, miR-6517, miR-107, miR-543-5p, miR-200a-3p, novel_127, miR-450a-2-3p, miR-1260a, novel_39, miR-3065-3p, miR-29b-2-5p, miR-3064-5p, miR-7975, miR-6395, miR-195a-5p, miR-107, miR-18a-3p, miR-3141, miR-29a-3p, miR-656-5p, miR-147-5p, miR-6119-3p, miR-29a, miR-16a, miR-15a, miR-133a-5p, miR-193b-3p, miR-29c-3p, miR-497-5p, miR-2889, miR-744-5p, miR-2284x, miR-30b-3p, miR-29b, miR-16b, miR-1260b, miR-873a-5p, miR-432, miR-103, miR-432-5p, miR-503-5p, miR-377-5p, miR-103a-3p, miR-125a-5p, miR-1343-5p, miR-106b-3p, miR-193a-3p, miR-378a-5p, miR-197-5p, miR-3141, miR-503-5p, let-7j, miR-432-3p, miR-382, miR-363-5p |
| GATA4 | ENSOARGO(GATA bin | miR-4510, miR-219a-5p, miR-6130, miR-2432, miR-9788-3p, miR-3065-5p, miR-7857, novel_124                                                                                                                                                                                                                                                                                                                                                                                                                                                                                                                                                                                                                                                                                                                                                                                                                                                                                                                                                                                                                                                                                                                                                                                                                                                                                                                                                                                                                                                                                 |
| PARM1 | ENSOARGO(prostate | miR-214, miR-665-5p, miR-130b-5p, miR-377-5p, miR-2331-5p, novel_51, miR-185-3p, miR-3141, novel_96, miR-21-3p, miR-130b-5p, miR-214-3p, miR-107, miR-4492, miR-491-5p, miR-450a-2-3p, miR-377-5p, miR-1224-5p, miR-103a-3p, miR-2331-3p, miR-103, novel_69, miR-1197-5p, miR-3141, miR-542-3p, miR-1843b-5p, miR-671-5p, miR-9851-3p, miR-107                                                                                                                                                                                                                                                                                                                                                                                                                                                                                                                                                                                                                                                                                                                                                                                                                                                                                                                                                                                                                                                                                                                                                                                                                           |
| DDX56 | ENSOARGO(DEAD (As |                                                                                                                                                                                                                                                                                                                                                                                                                                                                                                                                                                                                                                                                                                                                                                                                                                                                                                                                                                                                                                                                                                                                                                                                                                                                                                                                                                                                                                                                                                                                                                          |

miR-532-3p, miR-7859, miR-3600, miR-30d-3p, miR-548e-3p, miR-18a-3p, miR-16-1-3p, miR-2284u, novel\_73, miR-124-3p, miR-140-3p, miR-188-3p, miR-2300b-3p, miR-486-3p, miR-376a-5p, miR-195a-3p, miR-345-3p, miR-216c-5p, miR-329a-5p, miR-221-5p, miR-1277-5p, miR-760-3p, miR-466i-5p, miR-216a-5p, miR-500a-5p, miR-185-3p, miR-125b, miR-374a-5p, miR-2285p, miR-544-3p, miR-499b-3p, miR-377-3p, miR-656-3p, miR-216b-5p, miR-3065-3p, miR-216b-3p, miR-21-3p, miR-532-5p, miR-140-5p, miR-30c-1-3p, miR-2331-3p, miR-221-5p, miR-660-5p, miR-625-5p, miR-129b-3p, miR-433-3p, miR-6525, miR-2330-3p, miR-214, miR-539-5p, miR-3184-3p, miR-129-5p, miR-130b-5p, miR-664a, miR-30a-3p, miR-324-3p, miR-3604, miR-2285j, miR-30e-3p, miR-496-5p, miR-153, miR-147a, miR-548w, miR-2300a-5p, miR-21b, miR-1839-5p, miR-2284aa, miR-544a, miR-450b-5p, miR-501-3p, miR-3187-3p, miR-8485, miR-491-3p, miR-30c-1-3p, miR-652-5p, miR-2284b, miR-124a, miR-1388-3p, miR-2330-5p, miR-153-3p, miR-103a-2-5p, miR-214-3p, miR-342, miR-1306-5p, miR-326, miR-203-3p, miR-144-5p, miR-500-3p, miR-499a-3p, miR-541-5p, miR-2285u, miR-2284g, miR-2319b, miR-877-3p, miR-1983, miR-381-3p, miR-129b-5p, miR-140-5p, miR-361-3p, miR-8095, miR-502-3p, miR-154a, miR-361-3p, miR-2284j, miR-194b-5p, miR-9-5p, miR-374a-3p, miR-2285t, miR-2284q, miR-107-5p, miR-2285n, miR-218-5p, miR-2284z, miR-9-5p, miR-1224-5p, miR-429-3p, miR-411-3p, miR-582-3p, miR-501-3p, miR-330-5p, miR-3065-3p, miR-2284y, miR-2284a, miR-148b-5p, miR-30a-3p, novel\_127, miR-2898, miR-450a-2-3p, miR-127-5p, miR-30f, miR-3071-3p, miR-30c-2-3p, miR-125a-3p, miR-2284n, miR-365a-3p, miR-370-3p, miR-125a, miR-1271, miR-874-3p, miR-7144-5p, miR-1248, miR-671-5p, miR-767, miR-2318, miR-488-3p, miR-424-3p, miR-374a-3p, miR-6128, miR-144-5p, miR-181a-2-3p, miR-486b-3p, miR-374b-3p, miR-101-5p, miR-502, miR-138-5p, miR-376c-5p, miR-376b-5p, miR-376c-5p, miR-133b-3p, miR-3600, miR-182-5p, miR-3064-5p, miR-151a-3p, miR-6238, miR-210-3p, miR-30a-3p, miR-151-3p, miR-182-5p, miR-30e-3p, miR-592, miR-3085-3p, miR-3064-5p, miR-30a-3p, miR-133a-3p

miR-16b, miR-21-5p, miR-2284ab, miR-125b-1-3p, miR-497-5p, miR-7862, miR-2113, miR-450c-3p, miR-374b-3p, miR-185-5p, miR-134-3p, miR-26b-3p, miR-377-5p, miR-378a-5p, miR-1343-5p, miR-193a-3p, miR-466f-3p, miR-146a, miR-2411-3p, novel\_51, miR-2285r, miR-654-3p, miR-363-5p, miR-410-5p, miR-412-3p, miR-146b-5p, miR-195a-5p, miR-150-5p, miR-3970, miR-21c, miR-3065-5p, miR-216a-3p, novel\_69, miR-320c, miR-22-5p, miR-147-5p, miR-502-5p, miR-15a, miR-16a, miR-2428, miR-376a-3p, miR-193b-3p, miR-128-3p, miR-345-3p, miR-3591-5p, miR-1290, miR-218-2-3p, miR-1343-5p, miR-322-5p, miR-505-5p, miR-450a-1-3p, miR-214-5p, miR-6517, miR-125a-3p, miR-30c-2-3p, miR-450b-5p, miR-2478, miR-148b-5p, miR-3529-3p, miR-3064-5p, miR-190a-3p, miR-485-5p, miR-320a, miR-3965, miR-223-5p, miR-133c, miR-154b-5p, miR-370-3p, miR-2355-5p, miR-410-3p, miR-592, novel\_63, miR-2433, miR-331-3p, miR-100-3p, miR-145-3p, miR-193a-5p, miR-16-5p, miR-2426, miR-3120-5p, miR-301b-5p, miR-7857, miR-147a, miR-9788-3p, miR-148b-5p, miR-1343-3p, miR-3085-3p, novel\_124, miR-146b, miR-103a-2-5p, miR-320b, miR-199a-3p, miR-2957, miR-16b, miR-30c-1-3p, miR-8485, miR-1388-3p, miR-424-5p, miR-3963, novel\_94, miR-1983, miR-361-3p, miR-378j, miR-378g, miR-3596, miR-203-3p, miR-3064-5p, miR-4792, miR-20a-3p, miR-2285u, miR-7977, miR-499a-5p, miR-218-5p, miR-301a-5p, miR-107-5p, miR-361-3p, miR-877-3p, novel\_60, miR-3956-3p, novel\_73, miR-4429, miR-33b-3p, miR-133a-3p, miR-378d, miR-148a-5p, miR-2300b-3p, miR-1193, miR-222-5p, miR-15a-5p, miR-199a-3p, miR-3600, miR-212-5p, miR-320d, miR-202-5p, miR-760-3p, novel\_17, miR-210-5p, miR-2285p, miR-345-3p, miR-185-3p, miR-664b-3p, miR-377-5p, miR-146a-5p, miR-2432, miR-143-3p, miR-1827, novel\_99, miR-450a-1-3p, miR-2284s, miR-132-5p, miR-193b-3p, miR-154b-5p, miR-545-3p, miR-30c-1-3p, miR-

miR-409-3p, miR-100-3p, miR-3607-3p, miR-2284v, miR-1814c, novel\_91, miR-3068-3p, miR-574-5p, miR-2284n, miR-133c, miR-223-5p, miR-217, miR-3071-3p, miR-200c, miR-6119-5p, miR-107, miR-200c-3p, miR-127-5p, miR-181b-5p, miR-2898, miR-30a-3p, miR-1271-3p, miR-2478, miR-3578, miR-1290, miR-429-3p, miR-2284z, miR-1271-5p, miR-302a-5p, miR-9-5p, miR-6402, miR-199c, novel\_1, miR-378b, miR-3970, miR-379-5p, miR-146b-5p, miR-107, miR-378b, miR-670-3p, miR-194a, miR-146a, miR-466f-3p, miR-6240, miR-3071-5p, miR-194-5p, miR-542-3p, miR-1843b-5p, miR-181a-5p, miR-27b-3p, miR-2284x, miR-2284ab, miR-380-3p, miR-103a-3p, miR-544b, miR-103, miR-134-3p, miR-185-5p, miR-3535, miR-2284d, miR-3604, miR-30a-3p, miR-151-3p, miR-30e-3p, miR-208b-5p, miR-190a-5p, miR-6516-3p, miR-1271, miR-539-5p, miR-181c-5p, miR-433-3p, miR-186-5p, miR-32-3p, miR-504-5p, miR-877-5p, novel\_32, miR-544-3p, miR-216a-5p, miR-374a-5p, miR-2285p, miR-1277-5p, miR-2284m, miR-143-3p, miR-380-3p, miR-146a-5p, miR-2432, miR-142a-3p, miR-125b-2-3p, miR-217-5p, miR-1197-5p, novel\_73, miR-142-3p, miR-30d-3p, miR-199a-3p, miR-3964, miR-2285t, miR-181d-5p, miR-194b-5p, miR-9-5p, miR-452-5p, miR-190b-5p, miR-6527, miR-32-3p, miR-3059-5p, miR-154a, miR-8095, novel\_111, miR-381-3p, miR-378j, miR-668-5p, miR-504, miR-96-5p, miR-27a-3p, miR-489, miR-378g, miR-199a-3p, miR-146b, miR-3955-3p, miR-1185-5p, miR-382-3p, miR-758-3p, miR-2310, miR-193a, miR-758-3p, miR-4791, miR-21b, miR-2284aa, miR-544a, miR-27a-3p, miR-151a-3p, miR-199b-3p, miR-1298-3p, miR-147a

CCDC66 ENSOARGOC coiled-coil domain miR-345-3p, miR-1285-5p, miR-196a-3p, miR-216a-5p, miR-135a-5p, miR-6119-3p, miR-499a-5p, miR-21-3p, miR-26b-3p, miR-582-5p, novel\_116, miR-1434-3p, miR-1285, miR-3591-3p, miR-7144-5p, miR-582-5p, miR-135b-5p

WAC ENSOARGOC WW domain miR-3957-5p, miR-3064-5p, miR-299a-3p, miR-2319b, miR-2300a-5p, miR-615-5p, miR-9-5p, miR-299b-3p, miR-3957, miR-196a-5p, miR-150-5p, miR-411, miR-194-5p, miR-411-3p, miR-1388-5p, miR-664-5p, miR-3064-5p, miR-9-5p, miR-194b-5p, miR-371b-3p, miR-432-3p, miR-2284w, miR-2957, miR-107-5p, miR-194a, miR-196b-5p, miR-3085-3p, miR-379-3p, miR-129-5p, miR-103a-2-5p, miR-299-3p

TMTC2 ENSOARGOC transmembrane domain miR-345-3p, miR-1285-5p, miR-196a-3p, miR-216a-5p, miR-135a-5p, miR-6119-3p, miR-499a-5p, miR-21-3p, miR-26b-3p, miR-582-5p, novel\_116, miR-1434-3p, miR-1285, miR-3591-3p, miR-7144-5p, miR-582-5p, miR-135b-5p

|        |                   |                                                                                                                                                                                                                                                                                                                                                                                                                                                                                                                                                                                                                                                                                                                                                                                                                                                                                                                                                                                                                                                                                                                                                                                                                                         |
|--------|-------------------|-----------------------------------------------------------------------------------------------------------------------------------------------------------------------------------------------------------------------------------------------------------------------------------------------------------------------------------------------------------------------------------------------------------------------------------------------------------------------------------------------------------------------------------------------------------------------------------------------------------------------------------------------------------------------------------------------------------------------------------------------------------------------------------------------------------------------------------------------------------------------------------------------------------------------------------------------------------------------------------------------------------------------------------------------------------------------------------------------------------------------------------------------------------------------------------------------------------------------------------------|
| MRPL39 | ENSOARGO(mitochon | <p>novel_121, miR-222-5p, miR-2411-5p, miR-196a-2-3p, miR-16-1-3p, miR-2904, miR-217-5p, miR-140-3p, miR-501-3p, miR-196a-5p, miR-3578, miR-2300b-3p, miR-2411, miR-486-3p, miR-192-3p, miR-376c-3p, miR-345-3p, miR-216c-5p, miR-183-5p, miR-221-5p, miR-216a-5p, miR-217, miR-204-3p, miR-376c-3p, miR-376e-3p, miR-139-5p, miR-2285aa, miR-221-5p, miR-2331-3p, miR-548o-3p, miR-625-5p, miR-10b-3p, miR-345-5p, miR-345-5p, miR-500a-3p, miR-3154, miR-2285c, miR-500, miR-486b-3p, miR-455-3p, miR-2285e, miR-2285g, miR-222-5p, miR-145b, miR-26b-3p, miR-7862, miR-16-1-3p, miR-501-3p, miR-145a-5p, miR-3962, miR-345-5p, miR-432-3p, let-7c-3p, miR-1388-3p, miR-382-3p, miR-494-3p, miR-196b-5p, miR-2285v, miR-582, miR-6535, miR-500-3p, novel_69, miR-374c-3p, miR-670-3p, miR-139-5p, miR-502-3p, miR-452-5p, miR-495-3p, miR-2447, miR-335-5p, miR-212-3p, miR-502b, miR-147-5p, miR-2284q, miR-335, miR-382-3p, miR-2440</p>                                                                                                                                                                                                                                                                                            |
| VWA3A  | ENSOARGO(von Will | <p>miR-128-3p, miR-300, miR-1434-5p, miR-5703, miR-134, miR-134-5p, miR-380-5p, miR-181b-5p, miR-99a-3p, miR-450a-2-3p, miR-17-3p, miR-185-3p, miR-500a-5p, miR-30f, miR-664-3p, miR-2285af, miR-1271-3p, miR-376c-3p, miR-28b, miR-421-5p, miR-625-5p, miR-3154, miR-362-5p, miR-2285c, miR-381-3p, miR-877-5p, miR-323-5p, miR-3956, miR-99a-3p, miR-134-5p, miR-4492, miR-664a, miR-17-3p, miR-99b-3p, miR-181c-5p, miR-346, miR-1197-3p, miR-500b-5p, miR-425-5p, miR-27b-3p, miR-744-5p, miR-21b, miR-4508, miR-450b-5p, miR-2284ab, miR-145a-5p, miR-758-3p, miR-181a-5p, miR-432, miR-2284r, miR-873a-5p, miR-2285e, miR-500-5p, novel_116, miR-216a-3p, miR-194-3p, miR-455-3p, miR-2285g, miR-432-5p, miR-145b, miR-27a-3p, miR-330-3p, miR-122-3p, miR-187-3p, miR-3955-5p, miR-330-3p, miR-296-3p, novel_103, miR-758-3p, miR-296-3p, miR-8485, miR-432-3p, miR-2330-5p, miR-6240, miR-668-5p, miR-378j, miR-216a-3p, miR-2387, miR-4443, miR-27a-3p, miR-323a-5p, miR-25, miR-2404, miR-7977, miR-3120-3p, miR-664b, miR-6123, miR-421-5p, miR-203b-5p, miR-335, miR-128-1-5p, miR-28c, miR-502-5p, miR-2428, novel_27, miR-1285-5p, novel_111, miR-362-5p, miR-758-5p, miR-17-3p, miR-181d-5p, miR-335-5p, miR-3059-5p</p> |
| HPGD   | ENSOARGO(hydroxyp | <p>miR-145a-3p, miR-2330-3p, miR-9-5p, miR-1271, miR-30e-3p, miR-4324, miR-218-5p, miR-30a-3p, novel_1, miR-208b-5p, miR-2285t, miR-141-3p, miR-670-3p, miR-499a-3p, miR-376e-3p, miR-499b-3p, miR-376c-3p, miR-320c, miR-2387, miR-488-3p, miR-320a, miR-137-3p, miR-96-5p, miR-1291, miR-1248, miR-345-3p, miR-29b-2-5p, miR-30a-3p, miR-376c-3p, miR-539-3p, miR-320b, miR-505, miR-320d, miR-200a-3p, miR-187-3p, miR-485-3p, miR-30d-3p, miR-1271-5p, miR-487a-3p, miR-9-5p, miR-2459, miR-2113, miR-4429, miR-188-5p</p>                                                                                                                                                                                                                                                                                                                                                                                                                                                                                                                                                                                                                                                                                                          |

miR-2957, miR-323b-3p, miR-395b-3p, miR-130b-3p, miR-491-5p, miR-3085-3p, miR-2284b, miR-652-5p, miR-2310, miR-193a, miR-323b, miR-4791, miR-1298-5p, miR-222-5p, miR-5010-3p, miR-330-3p, miR-151a-3p, miR-2300a-5p, miR-148b-5p, miR-9788-3p, miR-539-5p, miR-2320-3p, miR-147a, miR-2285n, miR-3968, miR-9-5p, miR-423-5p, miR-1983, miR-493-5p, miR-4792, miR-3064-5p, miR-2284g, miR-2483-3p, miR-499a-3p, miR-92a-1-5p, miR-345-3p, miR-26a-5p, miR-299-3p, miR-143-3p, miR-486-3p, miR-2411, miR-2432, miR-2285i, miR-188-3p, miR-1246, miR-2284u, miR-148a-5p, miR-548e-3p, miR-328-3p, miR-151-5p, novel\_83, miR-7859, miR-665, miR-151-3p, miR-129-5p, miR-708-5p, miR-454-3p, miR-6516-3p, miR-2330-3p, miR-129-2-3p, miR-539-5p, miR-433-5p, miR-3184-5p, miR-6525, miR-433-3p, miR-27b-5p, miR-625-5p, miR-339b, miR-296-3p, miR-532-5p, miR-2331-3p, miR-151b, miR-22-3p, miR-499b-3p, miR-2411-3p, miR-330-3p, miR-105-5p, miR-296-3p, miR-7-5p, miR-483-3p, miR-363-5p, miR-493-5p, miR-6240, miR-296-3p, miR-22-3p, miR-223-3p, miR-7b-5p, miR-1434-3p, miR-873a-5p, miR-219a-1-3p, miR-1260b, miR-138, miR-130a-3p, miR-339-5p, miR-665, miR-185-5p, miR-3535, miR-133a-5p, miR-6119-3p, novel\_101, miR-2284w, miR-2428, novel\_27, miR-378b, miR-6395, miR-135b-5p, miR-7975, miR-2285k, miR-412-3p, miR-7-1-3p, miR-26b-5p, miR-320b, miR-669, miR-299b-3p, miR-2404, miR-339a, miR-8117, miR-1260a, miR-543-5p, novel\_96, miR-127-5p, miR-2898, miR-3064-5p, miR-2285b, miR-2284a, miR-29a-5p, miR-2284y, miR-2478, miR-134, miR-345-3p, novel\_79, miR-299a-3p, miR-129-1-3p, miR-582-3p, miR-134-5p, miR-483-3p, miR-2411-5p, miR-9-5p, miR-135a-5p, miR-6740-5p, miR-135a-1-3p, miR-410-5p, miR-28-5p, miR-134-5p, miR-486b-3p, miR-138-5p, miR-193a-5p, miR-1260b, miR-1197-3p, miR-3154, miR-1248, miR-671-5p, miR-485-5p, miR-1814c, let-7c-3p

miR-769-5p, miR-107-5p, miR-2285n, miR-218-5p, miR-2440, miR-2285t, miR-452-5p, miR-3059-5p, miR-361-3p, miR-361-3p, novel\_94, miR-211-5p, miR-7977, miR-2284g, miR-3064-5p, miR-10b, miR-1185-2-3p, miR-4443, miR-3596, miR-378e, miR-320b, miR-342, miR-2285o, miR-103a-2-5p, miR-542-5p, miR-3085-3p, miR-376b, miR-2284b, miR-652-5p, miR-1388-3p, miR-1839-3p, miR-378d, miR-412-3p, miR-1a-3p, miR-30b-3p, miR-484, miR-378b, miR-143-5p, miR-10b, miR-21b, miR-3120-5p, miR-378c, miR-1388-5p, miR-450b-5p, miR-1343-3p, miR-330-3p, miR-548w, miR-9788-3p, miR-2285e, miR-1185-3p, miR-324-3p, miR-15b-3p, miR-874-5p, miR-487a-5p, miR-708-5p, miR-130b-5p, miR-664a, miR-425-5p, miR-378c, miR-4510, miR-145a-3p, miR-338-3p, miR-769-5p, miR-10b-5p, miR-206-3p, miR-224-5p, miR-2285c, miR-625-5p, miR-216b-3p, miR-370-5p, miR-378a-3p, miR-221-5p, miR-548o-3p, miR-151b, miR-10a, miR-377-3p, miR-6130, miR-193b-3p, miR-324-3p, miR-422a, miR-542-5p, miR-34b-5p, miR-221-5p, miR-3653-3p, miR-21-3p, miR-320d, miR-760-3p, miR-329a-5p, miR-2285w, miR-486-3p, miR-378a-3p, miR-378i, miR-34a-5p, miR-378d, miR-493-3p, miR-142-3p, miR-4429, miR-18a-3p, miR-548e-3p, miR-151-5p, miR-2284h-5p, miR-7859, miR-1307-5p, miR-34c, miR-425-5p, miR-502-5p, miR-1247-3p, miR-6529b, miR-28c, miR-128-1-5p, miR-206, miR-29a, miR-1839-3p, miR-3957-3p, miR-193b-3p, miR-542-5p, novel\_101, miR-29c-3p, miR-1193, miR-342-3p, miR-449a, miR-2285m, miR-2428, miR-211, miR-24-3p, miR-150-5p, miR-18a-3p, miR-9851-3p, miR-378f, miR-1291, miR-10a-5p, miR-329-5p, miR-320c, miR-29a-3p, miR-34b, miR-330-3p, miR-224-5p, miR-377-3p, miR-452-5p, miR-106b-3p, miR-193a-3p, miR-124-5p, miR-2285l, miR-130b-5p, miR-6240, miR-1843b-5p, miR-2284x, miR-744-5p, miR-2889, miR-30b-3p, miR-29b, miR-26b-3p, miR-411-5p, miR-412-5p, miR-2285g, miR-331-3p, miR-3069, miR-2433, miR-29b-3p, miR-

miR-21c, miR-376b-3p, miR-378f, miR-2319a, miR-9851-3p, miR-329-5p, miR-3074-5p, miR-26b-5p, miR-670-3p, miR-181b-3p, miR-677, miR-144-3p, miR-6535, miR-28c, miR-6402, miR-142b, miR-4324, novel\_87, miR-206, miR-6119-3p, miR-421-5p, miR-219b-3p, miR-495-3p, miR-193b-3p, miR-323c, miR-2428, miR-1434-3p, miR-223-3p, miR-708-3p, miR-219a-1-3p, miR-380-3p, miR-30b-3p, miR-21-5p, miR-455-5p, miR-31-5p, miR-3431, miR-412-5p, miR-544b, miR-6238, miR-377-3p, miR-455-5p, miR-2411-3p, miR-105-5p, miR-190a, miR-466f-3p, miR-193a-3p, miR-1343-5p, miR-130b-5p, let-7f-2-3p, let-7f-2-3p, miR-432-3p, miR-22841, miR-432-3p, miR-345-5p, miR-488-3p, miR-362-5p, miR-3154, miR-137-3p, miR-345-5p, miR-10b-3p, miR-671-5p, miR-1248, miR-1814c, miR-190a-3p, miR-3068-3p, miR-141-3p, miR-2355-5p, miR-223-5p, miR-133c, miR-135a-1-3p, miR-409-3p, miR-3969, miR-26c, miR-144, miR-486b-3p, miR-28a-3p, miR-6128, miR-500b-5p, miR-378c, miR-145-3p, miR-345-3p, miR-1343-5p, miR-200b-3p, miR-105-2, miR-429-3p, miR-6516-5p, miR-378h, miR-9-5p, miR-200c, miR-125a-3p, miR-6119-5p, miR-219-3p, miR-376b-3p, miR-200c-3p, miR-127-5p, miR-28-3p, miR-450a-2-3p, miR-200a-3p, miR-181a-2-3p, miR-1, miR-29b-2-5p, miR-3064-5p, miR-28b, miR-148b-5p, miR-200a, miR-29a-5p, miR-409-5p, miR-668-5p, miR-504, miR-376a-3p, miR-2319b, miR-3064-5p, miR-7977, miR-2285u, miR-7689-3p, miR-541-5p, miR-378e, miR-376d, miR-2440, miR-3968, miR-2284q, miR-2447, miR-190b-5p, miR-9-5p, miR-452-5p, miR-362-5p, miR-219a-2-3p, miR-8095, miR-378b, miR-30b-3p, miR-7857, miR-1a-3p, miR-544a, miR-450b-5p, miR-101a-5p, miR-378c, miR-1388-5p, miR-16-2-3p, miR-101c, miR-105-1, novel\_78, miR-1343-3p, miR-548w, miR-181b-2-3p, miR-376b-3p, miR-455-3p, miR-9788-3p, miR-500-5p, novel\_115, miR-182-5p, miR-3955-3p, miR-3085-3p, miR-101b-3p, miR-378d, miR-2310, miR-8485, miR-345-5p, novel\_99, miR-



miR-412, miR-7641, miR-429-3p, miR-214-5p, miR-486-5p, miR-24-2-5p, miR-1271-5p, miR-200b-3p, let-7a-2-3p, miR-29b-2-5p, miR-1, miR-2284y, miR-1957a, miR-192-3p, miR-1271-3p, miR-2284a, miR-376b-3p, miR-2285af, miR-200c, miR-152-3p, miR-2898, miR-127-5p, miR-6536, miR-200c-3p, miR-331-5p, miR-300-3p, miR-320a, miR-876-3p, let-7g-3p, miR-6128, miR-323-3p, miR-100-3p, miR-331-3p, miR-135a-5p, miR-2284k, miR-370-5p, miR-2332, miR-31-3p, miR-28-5p, miR-31-5p, miR-2284d, miR-412-5p, miR-185-5p, miR-197-3p, novel\_23, miR-1434-3p, miR-219a-1-3p, miR-382, miR-6240, let-7a-2-3p, miR-330-3p, miR-7-1-3p, miR-320c, miR-670-3p, miR-3065-5p, miR-376b-3p, miR-148a-3p, miR-135b-5p, miR-2284e, miR-19a-3p, novel\_101, miR-1193, miR-495-3p, novel\_120, miR-24-3p, miR-33a-3p, miR-382-5p, miR-199c, miR-206, novel\_1, miR-148b-3p, miR-200b, miR-1197-5p, miR-5703, miR-376a-5p, miR-2284u, novel\_73, miR-33b-3p, miR-142-3p, miR-4429, miR-19b-3p, miR-376a-5p, miR-421-5p, miR-29b-1-5p, miR-130a-5p, miR-216a-5p, novel\_17, miR-2285p, miR-2484, miR-320d, miR-370-5p, miR-216b-3p, miR-140-5p, miR-204-3p, miR-139-5p, miR-216b-5p, miR-543-3p, miR-1271, miR-338-3p, miR-206-3p, miR-324-3p, miR-665, miR-338-5p, miR-29b-2-5p, miR-15b-3p, let-7b-3p, miR-129-5p, miR-708-5p, miR-222-5p, miR-2300a-5p, miR-199b-3p, miR-330-3p, miR-455-3p, miR-2459, miR-153, miR-376b-3p, miR-412-3p, miR-1a-3p, miR-2284b, miR-33a-5p, miR-101b-3p, miR-29b-1-5p, miR-320b, miR-153-3p, miR-7689-3p, miR-139-5p, miR-2284g, miR-10b, miR-203-3p, miR-376d, miR-3596, miR-489, miR-3082-5p, miR-129b-5p, miR-376a-3p, miR-335-3p, miR-9-3p, miR-96-5p, miR-1296-5p, miR-2284j, miR-2447, miR-1285-5p, miR-9-3p, miR-2285t, miR-370-5p, miR-1271, miR-139-5p, let-7i-5p, miR-30e-5p, miR-93-5p, miR-30d-5p, miR-17-5p, miR-876-3p, miR-20b-5p, miR-1306-5p, let-7b, miR-93, miR-1197-3p, let-7b-5p, miR-145-3p, miR-2285j, let-7f, miR-30e-3p, miR-370-5p, miR-30a-3p, miR-106a, miR-30d-3p, novel\_83, miR-532-3p, miR-345-3p, novel\_133, miR-1961, miR-30a-5p, miR-582-3p, let-7d, miR-128-3p, miR-20a, miR-3064-5p, miR-30a-3p, miR-4286, miR-29a-5p, let-7g, novel\_39, miR-2424, miR-2432, miR-490-3p, miR-2285b, let-7c-5p, miR-345-3p, miR-106a, miR-98-5p, let-7f-5p, miR-3653-3p, miR-30d, let-7k, miR-3064-5p, miR-139-5p, miR-378g, let-7d-5p, miR-4443, miR-409-5p, miR-381-3p, miR-216a-3p, miR-9851-3p, miR-2319a, let-7e-5p, miR-1193, miR-4324, miR-2440, miR-133a-5p, miR-20a-5p, let-7i, miR-628-3p, miR-6119-3p, miR-133b-5p, miR-432-5p, miR-134-3p, let-7g-5p, miR-20b, miR-6529a, miR-432, let-7a-5p, miR-106a-5p, miR-106b-5p, miR-17-5p, miR-106a-5p, miR-2411-3p, miR-3085-3p, miR-487b-5p, let-7e, miR-2285o

CEP44

ENSOARGO(centroso)

RRM2

ENSOARGO(ribonucl

miR-20b, miR-149-5p, novel\_116, miR-3431, miR-185-5p, miR-3535, miR-340-3p, miR-31-5p, miR-187-3p, miR-188-5p, miR-2284x, miR-4508, miR-29b, miR-30b-3p, miR-145a-5p, miR-194-5p, miR-197-3p, miR-450c-3p, miR-1434-3p, miR-7b-5p, miR-19b-2-5p, miR-345-5p, miR-296-3p, miR-628-5p, miR-6240, miR-130b-5p, miR-2285l, miR-194a, novel\_51, miR-106a-5p, miR-17-5p, miR-330-3p, miR-3141, miR-146a, miR-377-3p, miR-296-3p, miR-7-5p, miR-224-5p, miR-181b-3p, miR-677, miR-669, miR-29a-3p, miR-670-3p, miR-2404, miR-323a-5p, miR-3120-3p, miR-26b-5p, miR-329-5p, novel\_68, miR-6516-3p, miR-2319a, miR-146b-5p, miR-412-3p, miR-216a-3p, miR-3065-5p, miR-18a-3p, miR-1306, miR-148a-3p, miR-3141, miR-199b-5p, miR-495-3p, miR-29c-3p, miR-1193, miR-335-5p, miR-6123, miR-147-5p, miR-656-5p, miR-22-5p, miR-379-3p, miR-29a, novel\_1, miR-6529b, miR-28c, miR-20a-5p, miR-129-1-3p, novel\_121, miR-486-5p, miR-214-5p, miR-134-5p, miR-450a-1-3p, miR-7641, miR-128-3p, miR-411-3p, miR-29d-3p, miR-1290, miR-134, miR-1271-3p, miR-192-3p, miR-200a, miR-29a-5p, miR-199a-5p, miR-28b, miR-24-2-5p, miR-2403, miR-495-5p, novel\_127, miR-152-3p, miR-200a-3p, miR-2285af, miR-199a-5p, miR-324-5p, miR-769, miR-331-5p, miR-1271, miR-141-3p, miR-370-3p, miR-874-3p, miR-671-5p, miR-20b-5p, miR-7144-5p, miR-345-5p, miR-329b, miR-3154, miR-17-5p, miR-93-5p, miR-488-3p, miR-93, novel\_42, miR-134-5p, miR-28-5p, miR-486b-3p, miR-370-5p, novel\_63, miR-29b-3p, miR-2459, miR-9788-3p, miR-539-5p, miR-425-3p, miR-181b-2-3p, miR-145b, miR-330-3p, novel\_78, miR-101c, miR-2426, miR-1388-5p, miR-30b-3p, miR-323b, miR-301b-5p, miR-143-5p, miR-4791, miR-484, miR-2284r, miR-3187-3p, miR-376b, miR-652-5p, miR-33a-5p, let-7c-3p, miR-382-3p, miR-106a-5p, miR-127-3p, miR-1388-3p, miR-199b-5p, miR-146b, miR-3955-3p, novel\_124, miR-106b-5p, miR-322b-3p, miR-1306-5p, miR-100b-5p, miR-541-5p, miR-2319b, miR-130b-5p, miR-3074-5p, miR-3074-5p, novel\_25, miR-9-3p, miR-130b-5p, miR-654-3p

let-7k, let-7f-5p, miR-98-5p, miR-127-5p, miR-2284m, let-7c-5p, miR-185-3p, miR-618, let-7g, miR-3064-5p, let-7a-2-3p, miR-361-5p, miR-16-1-3p, miR-105-2, let-7d, miR-140-3p, miR-1961, miR-129-1-3p, miR-2284z, miR-376a-5p, miR-3600, novel\_74, miR-320e, let-7f, miR-410-5p, miR-2285j, let-7b-5p, miR-346, miR-214, miR-2284v, miR-129-2-3p, let-7b, miR-186-5p, miR-3074-1-3p, let-7g-3p, miR-488-3p, miR-21a-3p, let-7i-5p, miR-2284n, miR-544-3p, miR-503-3p, miR-504-5p, miR-2331-3p, let-7e, miR-214-3p, miR-378a-5p, miR-3085-3p, miR-455-5p, miR-105-5p, let-7a-2-3p, miR-654-3p, let-7a-5p, miR-27b-3p, miR-455-5p, miR-2284aa, miR-1839-5p, miR-16-1-3p, miR-544a, miR-2426, miR-2284ab, miR-3071-5p, miR-544b, let-7g-5p, miR-147a, miR-27a-3p, miR-105-1, miR-3958-3p, let-7i, miR-6402, miR-2285n, novel\_27, let-7e-5p, miR-376a-2-5p, miR-493-5p, miR-504, miR-27a-3p, let-7d-5p, miR-374c-3p, miR-3120-3p, miR-2285u, miR-20a-3p, miR-3064-5p

miR-106a, miR-106b-5p, miR-106a-5p, miR-17-5p, miR-144, miR-20a-5p, miR-2433, let-7a-2-3p, miR-93, miR-20a, miR-106a-5p, miR-9851-3p, miR-20b-5p, let-7g-3p, miR-17-5p, miR-93-5p, miR-20b, miR-144-3p, miR-139-5p, miR-582-5p, miR-106a, miR-139-5p

|        |                     |                                                                                                                                                                                                                                                                                                                                                                                                                                                                                                                                                                                                                                                                                                                                                                                                                                                                                                                                                                                                                                                                                                                                                                                                                                                                                                                                                                                                                                                                                                                                                                                                                                                                                                                                                                                                                                                                                                                                                                                                                                                                                                                                                                                                                                                                                                                                                                                                                      |
|--------|---------------------|----------------------------------------------------------------------------------------------------------------------------------------------------------------------------------------------------------------------------------------------------------------------------------------------------------------------------------------------------------------------------------------------------------------------------------------------------------------------------------------------------------------------------------------------------------------------------------------------------------------------------------------------------------------------------------------------------------------------------------------------------------------------------------------------------------------------------------------------------------------------------------------------------------------------------------------------------------------------------------------------------------------------------------------------------------------------------------------------------------------------------------------------------------------------------------------------------------------------------------------------------------------------------------------------------------------------------------------------------------------------------------------------------------------------------------------------------------------------------------------------------------------------------------------------------------------------------------------------------------------------------------------------------------------------------------------------------------------------------------------------------------------------------------------------------------------------------------------------------------------------------------------------------------------------------------------------------------------------------------------------------------------------------------------------------------------------------------------------------------------------------------------------------------------------------------------------------------------------------------------------------------------------------------------------------------------------------------------------------------------------------------------------------------------------|
| MS4A8  | ENSOARGO membrane   | miR-185-5p, miR-299b-3p, miR-29b-1-5p, let-7j, novel_25, miR-299a-3p, miR-216c-5p, miR-3074-2-3p, miR-29b-2-5p, miR-299-3p, miR-23a-5p, miR-2285t, miR-873a-5p, miR-29b-2-5p, miR-29b-1-5p                                                                                                                                                                                                                                                                                                                                                                                                                                                                                                                                                                                                                                                                                                                                                                                                                                                                                                                                                                                                                                                                                                                                                                                                                                                                                                                                                                                                                                                                                                                                                                                                                                                                                                                                                                                                                                                                                                                                                                                                                                                                                                                                                                                                                           |
| TRIM71 | ENSOARGO tripartite | miR-142-3p, miR-22-3p, novel_23, miR-23b-5p, miR-873a-5p, novel_133, miR-7b-5p, miR-1247-5p, miR-2355-3p, miR-328-3p, miR-2320-3p, miR-18b-5p, miR-187-3p, miR-18a-3p, miR-193a-3p, novel_127, miR-324-3p, miR-7-5p, miR-210-5p, miR-5126, miR-143-3p, miR-380-5p, miR-495-5p, miR-744-3p, miR-380-5p, miR-6395, miR-876-3p, miR-18a-5p, miR-18a, miR-18a-3p, miR-2448-3p, miR-18b, miR-22-3p, miR-2483-3p, miR-193b-3p, miR-874-3p, miR-31-3p, miR-324-3p, miR-193b-3p, miR-219a-5p, miR-145a-3p, miR-101a-5p, miR-362-3p, miR-3120-5p, miR-541, miR-301b-5p, miR-329-3p, miR-296-5p, miR-758-3p, miR-412-3p, miR-147a, miR-148b-5p, miR-216a-3p, miR-455-3p, miR-548w, miR-181b-2-3p, miR-5010-3p, miR-3085-3p, miR-214-3p, miR-326, miR-1306-5p, miR-16b, miR-106b-5p, miR-2957, miR-362-3p, miR-30c-1-3p, miR-758-3p, miR-3187-3p, miR-382-3p, miR-106a-5p, miR-2330-5p, miR-424-5p, miR-23a-3p, miR-668-5p, miR-504, miR-3963, miR-335-3p, miR-361-3p, miR-3082-5p, miR-2483-3p, miR-3596, miR-203-3p, miR-4792, miR-3064-5p, miR-7977, miR-4726-5p, miR-3968, novel_82, miR-301a-5p, miR-1973, miR-877-3p, miR-361-3p, miR-423-5p, miR-3956-3p, miR-541-3p, miR-2447, novel_60, miR-19b-3p, miR-378d, miR-148a-5p, miR-133a-3p, miR-362-3p, miR-376a-5p, miR-188-3p, miR-5703, miR-2904, miR-15a-5p, miR-23c, miR-383-5p, miR-23b-3p, miR-328-3p, novel_83, miR-106a, miR-466i-5p, miR-106a, miR-299-3p, miR-21-3p, miR-30b-3p, novel_17, miR-210-5p, miR-125b, miR-345-3p, miR-324-3p, miR-130a-5p, miR-181b-1-3p, miR-377-5p, miR-143-3p, miR-2411, miR-183-5p, miR-20a, miR-345-5p, miR-18a-5p, miR-133b-3p, miR-625-5p, miR-21a-3p, miR-433-3p, miR-129b-3p, miR-193b-3p, miR-6516, miR-377-3p, miR-15b-5p, miR-204-3p, novel_32, miR-22-3p, miR-140-5p, miR-30c-1-3p, miR-504-5p, miR-552-3p, miR-17-3p, miR-129-5p, miR-874-5p, miR-708-5p, miR-424-5p, miR-29b-2-5p, miR-320e, miR-665, miR-132-5p, miR-324-3p, miR-206-3p, miR-6525, miR-3184-5p, miR-3074-5p, miR-3184-3p, miR-665-5p, miR-214, miR-138, miR-16b, miR-497-5p, miR-7b-5p, miR-1285, miR-2113, miR-1843b-5p, miR-1434-3p, miR-22-3p, miR-103, miR-20b, miR-194-3p, miR-103a-3p, miR-340-3p, miR-26b-3p, miR-377-5p, miR-378a-5p, miR-193a-3p, miR-125a-5p, miR-377-3p, miR-296-3p, miR-7-5p, miR-106a-5p, miR-17-5p, miR-2331-5p, miR-2411-3p, miR-345-5p, miR-296-3p, miR-628-5p, miR-362-5p, miR-10a-3p, miR-107, miR-1201, miR-105a- |
| MS4A18 | ENSOARGO membrane   |                                                                                                                                                                                                                                                                                                                                                                                                                                                                                                                                                                                                                                                                                                                                                                                                                                                                                                                                                                                                                                                                                                                                                                                                                                                                                                                                                                                                                                                                                                                                                                                                                                                                                                                                                                                                                                                                                                                                                                                                                                                                                                                                                                                                                                                                                                                                                                                                                      |

miR-196a-2-3p, miR-545-5p, miR-302a-5p, miR-378h, miR-6516-5p, miR-30a-5p, miR-345-3p, miR-134, miR-582-3p, miR-181a-2-3p, miR-199a-5p, miR-1957a, miR-490-3p, miR-1271-3p, miR-30c-2-3p, miR-107, miR-543-5p, miR-92a-3p, miR-17-3p, miR-141-3p, miR-199a-5p, miR-374c-3p, miR-769, miR-3154, miR-485-5p, miR-133a-3p, miR-378c, miR-331-3p, miR-144, miR-1-5p, miR-370-5p, miR-2332, miR-204-5p, miR-138-5p, miR-767-5p, miR-130a-3p, miR-26b-3p, miR-187-3p, miR-103, miR-374b-3p, miR-7862, miR-138, miR-21-5p, miR-2284ab, miR-382, miR-2331-5p, miR-660, miR-125a-5p, miR-466f-3p, miR-320b, miR-323a-5p, miR-146b-3p, miR-2404, miR-21c, miR-18a-3p, miR-2285ab, miR-195a-5p, miR-450b-3p, miR-107, novel\_101, miR-1193, miR-17-3p, miR-495-3p, miR-2428, miR-211, miR-371b-3p, miR-24-3p, miR-16a, miR-15a, miR-6402, miR-203b-5p, miR-92a-3p, miR-3600, miR-548e-3p, miR-199a-3p, miR-222-5p, miR-148b-3p, miR-15a-5p, miR-2904, miR-140-3p, miR-5703, miR-2300b-3p, miR-1246, miR-378d, miR-216c-5p, miR-125b, miR-1277-5p, miR-30d, miR-299-3p, miR-21-3p, miR-21-3p, miR-370-5p, miR-140-5p, miR-378a-3p, miR-660-5p, novel\_32, miR-204-3p, miR-6516, miR-139-5p, miR-323-5p, miR-21a-3p, novel\_99, miR-133b-3p, miR-2312, miR-378c, miR-145a-3p, miR-132-5p, miR-487a-5p, miR-424-5p, miR-450b-3p, miR-6516-3p, miR-664a, miR-17-3p, miR-27a-3p, miR-409b, novel\_4, miR-216a-3p, miR-412-3p, miR-378b, miR-296-5p, miR-484, miR-378c, miR-299a-5p, miR-33a-5p, miR-376b, miR-424-5p, miR-30c-1-3p, miR-20a-3p, miR-27a-3p, miR-7857-3p, miR-378e, miR-3082-5p, miR-129b-5p, miR-361-3p, miR-199b-5p, miR-877-3p, miR-2285f, miR-1296-5p, miR-541-3p, miR-769-5p, miR-2285n, miR-2285t, miR-412, miR-299a-3p, miR-134-5p, miR-450a-1-3p, miR-322-5p, miR-505-5p, miR-192-3p, miR-148b-5p, miR-92b-3p, miR-30f, miR-200a-3p, miR-152-3p, novel\_127, novel\_96, miR-1a-2-5p, miR-125a, miR-574-

DNMT1 ENSOARGO(C DNA (cyt

miR-345-3p, miR-218-2-3p, miR-1343-5p, miR-6516-5p, miR-9-5p, miR-6517, novel\_79, miR-17-3p, novel\_127, miR-125a-3p, miR-339a, miR-450b-5p, miR-28b, miR-1957a, miR-376c-5p, miR-376b-5p, miR-181a-2-3p, miR-2284f, miR-3064-5p, miR-345-5p, miR-485-5p, miR-1814c, miR-376c-5p, miR-376c-5p, miR-3154, miR-362-5p, miR-365a-3p, miR-34c-5p, miR-376c-3p, miR-542-5p, miR-2285aa, miR-2355-5p, miR-486b-3p, miR-28-5p, miR-370-5p, miR-2433, miR-331-3p, miR-144, miR-380-3p, miR-1434-3p, miR-873a-5p, miR-22-3p, miR-2285g, miR-3535, miR-544b, miR-194-3p, miR-339-5p, miR-1343-5p, miR-2411-3p, novel\_51, miR-3141, miR-654-3p, miR-345-5p, miR-450b-3p, miR-9851-3p, miR-3141, miR-376b-5p, miR-18a-3p, miR-1306, miR-34b, miR-146b-3p, miR-6535, miR-144-3p, miR-329-5p, miR-6123, miR-147-5p, miR-6402, miR-28c, miR-576-3p, miR-1247-3p, miR-502-5p, miR-34c, miR-2284o, miR-2428, novel\_27, miR-449a, miR-17-3p, miR-1193, miR-184-3p, miR-34a-5p, miR-2300b-3p, miR-1193, miR-140-3p, miR-124-3p, miR-222-5p, novel\_83, miR-18a-3p, miR-3600, miR-34b-5p, miR-210-5p, miR-376c-3p, miR-376a-5p, miR-29b-1-5p, miR-143-3p, miR-380-3p, miR-2424, miR-486-3p, miR-329a-5p, miR-339b, miR-345-5p, miR-625-5p, miR-2285c, miR-21a-3p, miR-6130, miR-6516, miR-544-3p, miR-376e-3p, miR-22-3p, miR-204-3p, miR-2331-3p, miR-552-3p, miR-370-5p, miR-664a, miR-17-3p, miR-708-5p, miR-2285j, miR-4510, miR-539-5p, miR-3074-2-3p, miR-544a, miR-4791, miR-125b-2-3p, miR-2285e, miR-2459, miR-500-5p, miR-2300a-5p, novel\_4, miR-222-5p, miR-25-5p, miR-3085-3p, miR-2285o, miR-1306-5p, miR-29b-1-5p, miR-2957, miR-2310, miR-494-3p, miR-124a, let-7c-3p, miR-3963, miR-877-3p, miR-335-3p, miR-361-3p, miR-3082-5p, miR-3064-5p, miR-2285u, miR-2440, novel\_82, miR-362-5p, miR-3956-3p, miR-2447, novel\_60, miR-9-5p

miR-582-3p, miR-200b-3p, miR-30c, miR-496, miR-1290, miR-29d-3p, miR-30a-5p, miR-330-5p, miR-322-5p, miR-758-5p, miR-6516-5p, miR-450a-1-3p, miR-6517, miR-429-3p, miR-7641, novel\_79, miR-376a-5p, miR-200c-3p, miR-107, miR-543-5p, miR-92a-3p, novel\_96, miR-200a-3p, miR-200c, miR-125a-3p, miR-30f, miR-339a, miR-92b-3p, miR-380-5p, miR-28b, miR-450b-5p, miR-3065-3p, miR-199a-5p, miR-29a-5p, miR-450c-5p, miR-2285b, miR-30a-3p, miR-767, miR-345-5p, miR-376c-5p, miR-1248, miR-671-5p, miR-488-3p, miR-30e-5p, miR-503-3p, miR-2448-3p, miR-376c-5p, miR-34c-5p, miR-3959-5p, miR-769, miR-25-3p, miR-199a-5p, miR-133c, miR-3068-3p, miR-141-3p, miR-125a, miR-767-5p, miR-410-5p, miR-29b-3p, novel\_63, miR-125b-5p, miR-26c, miR-6128, miR-16-5p, miR-193a-5p, miR-103b, miR-29b, miR-16b, miR-497-5p, miR-7862, miR-27b-3p, miR-653, miR-1434-3p, miR-542-3p, miR-450c-3p, novel\_23, miR-412-5p, miR-3535, miR-3431, miR-149-5p, miR-103, miR-31-5p, miR-103a-3p, miR-339-5p, miR-26b-3p, miR-660, miR-125a-5p, miR-224-5p, miR-296-3p, miR-330-3p, miR-32, miR-654-3p, miR-296-3p, miR-345-5p, miR-380-5p, miR-6240, miR-382, miR-107, miR-195a-5p, miR-505-3p, miR-376a-2-5p, miR-376b-5p, miR-2387, miR-3591-3p, miR-29a-3p, miR-34b, novel\_68, miR-216b-3p, miR-26b-5p, miR-92a-3p, novel\_1, miR-29a, miR-421-5p, miR-656-5p, miR-625-3p, miR-199c, miR-502-5p, miR-15a, miR-28c, miR-6402, miR-16a, miR-34c, miR-382-5p, miR-24-3p, novel\_27, miR-326-3p, miR-449a, miR-199b-5p, miR-2285m, miR-2284w, miR-219b-3p, miR-135a-2-3p, miR-1839-3p, miR-758-5p, novel\_101, miR-495-3p, miR-29c-3p, miR-2285x, let-7a-3p, miR-34a-5p, miR-30c-5p, novel\_133, miR-376a-5p, miR-383-5p, miR-15a-5p, miR-222-5p, miR-200b, miR-199a-3p, miR-380-5p, miR-212-5p, miR-30d-3p, miR-505-3p, miR-34b-5p, miR-30d, miR-21-3p, miR-30b, miR-660-5p, miR-3957-5p, miR-545-3p, miR-296-3p, miR-6516, miR-3957, miR-15b-5p, miR-301, miR-487b-5p, miR-433-3p, miR-2312, miR-876-3p, novel\_48, miR-625-5p, miR-543-3p, miR-3074-1-3p, miR-539-5p, miR-3074-2-3p, miR-2330-3p, miR-16-5p, miR-1197-3p, miR-6134, miR-365a-5p, miR-494-5p, miR-30e-3p, miR-30a-3p, miR-19b-1-5p, novel\_9, miR-487b-5p, miR-424-5p, miR-485-3p, miR-30d-3p, miR-15a-5p, miR-483-3p, miR-6516-5p, miR-322-5p, miR-487a-3p, miR-361-5p, miR-664-5p, miR-128-3p, miR-30a-3p, miR-421-5p, miR-450b-5p, miR-490-3p, miR-376c-5p, miR-376b-5p, miR-205-5p, miR-376b-3p, miR-185-3p, miR-127-5p, miR-181b-5p, miR-7-1-3p, miR-499b-5p, miR-7857-3p, miR-376d, miR-2285ab, miR-376b-3p, miR-216a-3p, miR-9-3p, miR-195a-5p, miR-376a-3p, miR-541-3p, miR-181d-5p, miR-2285x, miR-2285f, miR-142b, miR-382-3p, miR-15a, miR-16a, miR-485-3p, miR-147-5p, miR-330-3p, miR-376b-3p, miR-216a-3p, miR-194-3p, miR-181a-5p, miR-541, miR-19b-2-5p, miR-1388-5p, miR-16b, miR-497-5p, miR-6240, miR-494-3p, miR-424-5p, miR-539-3p, miR-16b, miR-505, miR-330-3p, miR-365b-5p, miR-2957, miR-487b-5p, miR-483-3p, miR-466f-3p, miR-660

miR-199c, miR-502-5p, miR-4324, miR-576-3p, miR-33a-3p, let-7i, miR-211, miR-323c, novel\_27, miR-199b-5p, novel\_120, miR-1a-1-5p, miR-17-3p, miR-410-5p, miR-412-3p, miR-146b-5p, let-7e-5p, miR-18b, miR-2387, miR-3970, miR-21c, miR-374c-3p, miR-670-3p, miR-6535, miR-320c, miR-378b, miR-3120-3p, miR-196b-5p, miR-466f-3p, miR-146a, miR-194a, miR-345-5p, miR-380-5p, miR-130b-5p, miR-21-5p, miR-16-1-3p, miR-1260b, miR-26a-2-3p, miR-188-5p, miR-2284x, miR-1285, miR-223-3p, miR-22-3p, miR-3071-5p, novel\_23, miR-194-5p, miR-412-5p, miR-185-5p, let-7g-5p, novel\_116, miR-194-3p, miR-2355-3p, miR-3955-5p, miR-26b-3p, miR-204-5p, miR-1-5p, miR-2284k, miR-374a-3p, miR-1260b, miR-345-5p, miR-2318, miR-485-5p, miR-488-3p, miR-2448-3p, miR-3154, miR-18a, miR-320a, miR-331-5p, miR-199a-5p, miR-154b-5p, miR-376c-3p, miR-141-3p, miR-17-3p, miR-1a-2-5p, let-7f-5p, miR-200a-3p, miR-205-5p, miR-1260a, let-7c-5p, miR-380-5p, miR-2478, miR-200a, miR-29a-5p, let-7g, miR-199a-5p, miR-2285b, let-7d, miR-196a-5p, miR-218-2-3p, miR-6516-5p, miR-129-1-3p, miR-2285ad, miR-18b-5p, miR-499a-5p, miR-374a-3p, novel\_82, miR-2285n, miR-218-5p, miR-2285y, miR-301a-5p, miR-7705, miR-3059-5p, miR-194b-5p, miR-219a-5p, miR-452-5p, miR-1983, miR-544-5p, miR-877-3p, miR-140-5p, miR-199b-5p, miR-489, miR-2483-3p, let-7d-5p, miR-452-3p, miR-2285u, miR-211-5p, miR-487b-5p, miR-146b, miR-199b-5p, let-7e, miR-320b, let-7a-5p, miR-494-3p, miR-652-5p, miR-744-3p, miR-1388-5p, miR-1839-5p, miR-301b-5p, miR-1298-3p, miR-147a, miR-2300a-5p, miR-199b-3p, novel\_78, miR-5010-3p, miR-17-3p, miR-208b-5p, miR-130b-5p, miR-669a-3p, let-7f, miR-665, miR-346, let-7b-5p, miR-6134, let-7b, miR-4510, miR-129-2-3p, miR-3958-5p, miR-345-5p, miR-18a-5p, miR-625-5p, miR-21a-3p, miR-129b-3p, miR-27b-5p, miR-433-3p, miR-376a-3p, miR-6516, miR-6130, miR-22-3p, let-7i-5p, miR-877-3p, miR-3071-3p, miR-432, novel\_133, miR-1983, miR-221-5p, miR-668-5p, miR-412-3p, miR-221-5p, miR-31-5p, miR-455-3p, miR-432-5p

KDELR3 ENSOARGO(KDEL (Ly 7c-5p, miR-200a, miR-29a-5p, let-7g, miR-199a-5p, miR-2285b, let-7d, miR-196a-5p, miR-218-2-3p, miR-6516-5p, miR-129-1-3p, miR-2285ad, miR-18b-5p, miR-499a-5p, miR-374a-3p, novel\_82, miR-2285n, miR-218-5p, miR-2285y, miR-301a-5p, miR-7705, miR-3059-5p, miR-194b-5p, miR-219a-5p, miR-452-5p, miR-1983, miR-544-5p, miR-877-3p, miR-140-5p, miR-199b-5p, miR-489, miR-2483-3p, let-7d-5p, miR-452-3p, miR-2285u, miR-211-5p, miR-487b-5p, miR-146b, miR-199b-5p, let-7e, miR-320b, let-7a-5p, miR-494-3p, miR-652-5p, miR-744-3p, miR-1388-5p, miR-1839-5p, miR-301b-5p, miR-1298-3p, miR-147a, miR-2300a-5p, miR-199b-3p, novel\_78, miR-5010-3p, miR-17-3p, miR-208b-5p, miR-130b-5p, miR-669a-3p, let-7f, miR-665, miR-346, let-7b-5p, miR-6134, let-7b, miR-4510, miR-129-2-3p, miR-3958-5p, miR-345-5p, miR-18a-5p, miR-625-5p, miR-21a-3p, miR-129b-3p, miR-27b-5p, miR-433-3p, miR-376a-3p, miR-6516, miR-6130, miR-22-3p, let-7i-5p, miR-877-3p, miR-3071-3p, miR-432, novel\_133, miR-1983, miR-221-5p, miR-668-5p, miR-412-3p, miR-221-5p, miR-31-5p, miR-455-3p, miR-432-5p

HIF1AN ENSOARGO(hypoxia 668-5p, miR-412-3p, miR-221-5p, miR-31-5p, miR-455-3p, miR-432-5p

ODC1 ENSOARGO(ornithin miR-500a-3p, miR-652-5p, miR-376c-3p, miR-133a-3p, miR-500

miR-107, miR-797b, miR-376a-2-5p, miR-195a-5p, miR-6516-3p, miR-376b-3p, miR-323a-5p, miR-146b-3p, miR-34b, miR-29a-3p, miR-320b, novel\_1, miR-199c, miR-15a, miR-133a-5p, miR-34c, miR-16a, miR-33a-3p, miR-211, miR-24-3p, miR-3959-3p, miR-449a, novel\_120, miR-3957-3p, miR-17-3p, miR-29b, miR-455-5p, miR-3071-5p, miR-194-5p, miR-145a-5p, miR-2285g, miR-432-5p, miR-544b, miR-103, miR-124-5p, miR-455-5p, miR-654-3p, miR-130b-5p, miR-10b-3p, miR-7144-5p, miR-190a-3p, miR-2448-3p, miR-3154, miR-320a, miR-34c-5p, miR-374c-3p, miR-3965, miR-199a-5p, miR-154b-5p, miR-204-5p, miR-29b-3p, miR-2332, miR-135a-1-3p, miR-331-3p, miR-365a-5p, miR-145-3p, miR-3607-3p, miR-6128, miR-133a-3p, miR-105-2, miR-496, miR-345-3p, miR-134, miR-29d-3p, miR-6516-5p, miR-582-3p, miR-17-3p, miR-200c-3p, miR-107, miR-200c, miR-217, miR-380-5p, miR-199a-5p, miR-30a-3p, miR-29b-2-5p, miR-2385-3p, novel\_94, miR-199b-5p, miR-129b-5p, miR-7857-3p, miR-27a-3p, miR-452-3p, miR-499b-5p, novel\_60, miR-3059-5p, miR-212-3p, miR-541-3p, miR-194b-5p, miR-452-5p, miR-544a, miR-450b-5p, miR-2284aa, miR-143-5p, miR-2285e, miR-105-1, miR-409b, novel\_4, miR-5010-3p, miR-27a-3p, miR-3955-3p, miR-320b, miR-491-3p, miR-758-3p, miR-424-5p, miR-382-3p, miR-494-3p, miR-652-5p, miR-133b-3p, novel\_99, miR-544-3p, miR-6516, miR-323-5p, miR-139-5p, miR-496-3p, miR-450b-3p, miR-17-3p, miR-6516-3p, miR-424-5p, miR-208b-5p, miR-338-5p, miR-320e, miR-29b-2-5p, miR-539-5p, miR-145a-3p, miR-2330-3p, miR-4429, miR-2904, miR-1197-5p, miR-1193, miR-5703, miR-340-5p, miR-15a-5p, miR-199a-3p, miR-3600, miR-320d, miR-466i-5p, miR-34b-5p, miR-29b-1-5p, miR-125b-2-3p, miR-130a-5p, miR-2432, miR-183-5p, miR-412-3p, miR-2319a, miR-411b-3p, miR-677, miR-320c, miR-181b-3p, miR-329-5p, miR-29a, novel\_87, miR-199b-5p, miR-758-5p, miR-29c-3p, miR-16b, miR-16-1-3p, miR-26a-2-3p, miR-1497-5p, miR-2440, miR-33a-3p, miR-29a, novel\_1, miR-499a-5p, miR-3968, miR-22-5p, miR-3059-5p, miR-29c-3p, miR-17-3p, novel\_27, miR-381-3p, miR-136-5p, miR-96-5p, miR-376a-2-5p, novel\_94, miR-3074-5p, miR-10a-5p, miR-499b-5p, miR-29a-3p, miR-3596, miR-181b-3p, miR-677, miR-182-5p, miR-2411-3p, miR-365b-5p, miR-214-3p, miR-382-3p, miR-124a, miR-130b-5p, miR-376b, let-7c-3p, miR-2285r, miR-2310, miR-181a-5p, miR-10b, miR-653, miR-296-5p, miR-6529a, novel\_23, miR-197-3p, miR-299a-5p, miR-29b, miR-1839-5p, novel\_78, miR-548w, miR-181b-2-3p, miR-455-3p, miR-148b-5p, miR-30e-3p, miR-29b-3p, novel\_63, let-7b-3p, miR-30a-3p, miR-17-3p, miR-331-5p, miR-669a-3p, miR-130b-5p, miR-487a-5p, miR-3074-5p, miR-145a-3p, miR-214, miR-3074-2-3p, miR-1271, miR-98-3p, miR-10b-5p, miR-365a-5p, miR-145-3p, miR-331-5p, miR-488-3p, miR-137-3p, miR-329b, let-7g-3p, miR-1814c, miR-23a-5p, miR-221-5p, miR-182-5p, miR-3065-3p, miR-216b-3p, miR-10a, novel\_17, miR-345-3p, miR-181b-5p, miR-17-3p, miR-221-5p, miR-345-3p, miR-30a-3p, miR-130a-5p, miR-181b-1-3p, miR-148b-5p, miR-200a, miR-3065-3p, miR-345-3p, miR-1434-5p, miR-29d-3p, miR-124-3p, miR-98-3p, miR-378d, let-7a-3p, miR-148a-5p, miR-10a-5p, miR-218-1-3p, miR-212-5p, miR-376a-5p, miR-30d-3p, miR-3600, miR-1271-5p, miR-758-5p, novel\_121



miR-320c, miR-144-3p, miR-144-5p, miR-489, miR-320b, miR-374b-5p, miR-216b-3p, miR-493-5p, miR-19a-3p, miR-301b-3p, miR-17-3p, miR-1a-1-5p, miR-2440, miR-20a-5p, miR-20b, miR-130a-3p, miR-487b-3p, miR-105-1, miR-2284x, miR-16-1-3p, miR-450b-5p, miR-1388-5p, miR-197-3p, miR-412-3p, miR-7b-5p, miR-708-3p, miR-1b-5p, miR-296-3p, let-7c-3p, miR-382-3p, miR-493-5p, miR-106a-5p, miR-124a, miR-466f-3p, miR-452-5p, miR-130b-3p, miR-106a-5p, miR-17-5p, miR-105-5p, miR-296-3p, miR-320b, miR-7-5p, miR-6516, miR-301a-3p, miR-582-5p, miR-2331-3p, miR-1827, miR-3074-1-3p, miR-20b-5p, let-7g-3p, miR-10b-3p, miR-17-5p, miR-320a, miR-93-5p, miR-93, miR-144-5p, miR-374b, miR-28a-3p, miR-454-3p, miR-17-3p, miR-3604, miR-320e, miR-144, miR-2332, miR-1-5p, miR-410-5p, miR-2284h-5p, miR-6516-5p, miR-95-3p, miR-302a-5p, miR-212-5p, miR-412, miR-429-3p, miR-106a, miR-361-5p, miR-105-2, miR-16-1-3p, miR-300, miR-582-3p, miR-19b-3p, miR-4429, miR-140-3p, miR-217-5p, miR-124-3p, miR-143-3p, miR-369-3p, miR-20a, miR-21-3p, miR-200c-3p, miR-1a-2-5p, miR-17-3p, miR-106a, miR-28-3p, miR-320d, miR-217, miR-500a-5p, miR-200c, miR-125a-3p, miR-2285af, miR-205-5p, miR-544-3p, miR-192-5p, miR-582-5p, miR-301a-3p, miR-323-5p, miR-15b-5p, miR-221-5p, miR-30c-1-3p, novel\_107, miR-18a-5p, miR-625-5p, miR-186-5p, miR-582-5p, miR-21a-3p, miR-655, miR-206-3p, miR-3074-2-3p, miR-214, miR-2330-3p, miR-17-3p, miR-454-3p, miR-190a-5p, miR-424-5p, miR-30a-3p, miR-665, miR-3604, miR-655-3p, miR-383-5p, miR-148b-3p, miR-15a-5p, novel\_83, miR-30d-3p, miR-212-5p, miR-33b-3p, miR-142-3p, miR-218-1-3p, miR-16-1-3p, miR-215-5p, miR-5703, miR-216c-5p, miR-760-3p, miR-99a-3p, miR-466i-5p, miR-221-5p, miR-542-5p, novel\_17, miR-618, miR-3601, miR-345-3p, miR-125b, miR-3596, miR-454-5p, miR-541-5p, miR-668-5p, miR-544-5p, miR-8095, miR-212-3p, miR-6527, miR-194b-5p, let-7i-3p, miR-9-5p, miR-628-3p, miR-107-5p, miR-539-5p, miR-421, miR-105-1, miR-330-3p, novel\_78, novel\_4, miR-544a, miR-21b, miR-1a-3p, miR-30c-1-3p, miR-491-3p, miR-2310, miR-101b-3p, novel\_124, miR-130b-3p, miR-542-5p, miR-103a-2-5p, miR-214-3p, miR-326, novel\_103, miR-16b, miR-300-3p, miR-3965, miR-324-5p, miR-154b-5p, miR-99a-3p, miR-125a, miR-215-5p, miR-329b, miR-503-3p, miR-424-3p, miR-200a-5p, miR-18a, miR-16-5p, miR-29b-3p, miR-99b-3p, miR-2332, miR-125b-5p, miR-144, miR-24-2-5p, miR-9-5p, miR-483-3p, miR-545-5p, novel\_121, miR-18b-5p, miR-345-3p, miR-196a-5p, miR-1290, miR-29d-3p, miR-330-5p, novel\_39, miR-29a-5p, miR-30a-3p, miR-1, miR-17-3p, miR-107, miR-152-3p, miR-30f, miR-30c-2-3p, miR-323a-5p, miR-29a-3p, novel\_69, miR-144-3p, miR-669, miR-107, miR-195a-5p, miR-148a-3p, miR-3141, miR-18b, miR-150-5p, miR-326-3p, miR-301b-3p, miR-2284w, miR-136-3p, miR-542-5p, miR-17-3p, miR-29c-3p, miR-495-3p, miR-29a, miR-206, novel\_1, miR-147-5p, miR-15a, miR-4324, miR-1307-5p, miR-16a, miR-185-5p, miR-103, miR-544b, miR-31-5p, miR-103a-3p, miR-130a-3p, miR-29b, miR-16b, miR-16-1-3p, miR-107-

COQ10B ENSOARGO( coenzyme

DICER1 ENSOARGO( dicer 1,

|       |                     |                                                                                                                                                                                                                                                                                                                                                                                                                                                                                                                                                                                                                                                                                                                                                                                                                                                                                                                                                                                                                                                                                                                                                                                                                                                                                                                                                                                                                                                                                                                                                                                                                                                                                                                                                                                                                                                                                                                                                                                                                                                                                                                                                                                                                                                                                                                                                                                                                                                                                                         |
|-------|---------------------|---------------------------------------------------------------------------------------------------------------------------------------------------------------------------------------------------------------------------------------------------------------------------------------------------------------------------------------------------------------------------------------------------------------------------------------------------------------------------------------------------------------------------------------------------------------------------------------------------------------------------------------------------------------------------------------------------------------------------------------------------------------------------------------------------------------------------------------------------------------------------------------------------------------------------------------------------------------------------------------------------------------------------------------------------------------------------------------------------------------------------------------------------------------------------------------------------------------------------------------------------------------------------------------------------------------------------------------------------------------------------------------------------------------------------------------------------------------------------------------------------------------------------------------------------------------------------------------------------------------------------------------------------------------------------------------------------------------------------------------------------------------------------------------------------------------------------------------------------------------------------------------------------------------------------------------------------------------------------------------------------------------------------------------------------------------------------------------------------------------------------------------------------------------------------------------------------------------------------------------------------------------------------------------------------------------------------------------------------------------------------------------------------------------------------------------------------------------------------------------------------------|
|       |                     | miR-339b, miR-10a-5p, miR-877-3p, miR-3120-5p, miR-10b, miR-450a-1-3p, miR-1434-3p, miR-450c-3p, miR-10a, miR-450a-1-3p, novel_79, miR-339-5p, miR-10a-5p, miR-450b-3p, miR-22-5p, miR-410-5p, miR-2285n, miR-219-3p, miR-219b-3p, miR-339a, miR-10b-5p, miR-346, miR-219a-2-3p, miR-181a-2-3p, miR-490-5p, miR-106b-3p, miR-3085-3p, miR-500a-5p, miR-342, miR-135a-1-3p, miR-8117, miR-370-5p, miR-3064-5p, miR-1193, miR-342-3p, miR-574-3p, miR-2889, miR-27b-3p, miR-1843b-5p, miR-27a-3p, miR-370-5p, miR-27a-3p, miR-3064-5p, miR-7975, miR-378d, miR-27b-3p, miR-331-5p, miR-2366, miR-27a-3p, miR-378g, miR-134-3p, miR-431, miR-27a-3p, miR-452-5p, miR-592, miR-664a, miR-331-5p, miR-431-5p, let-7j, miR-2428, miR-2285r, miR-654-3p                                                                                                                                                                                                                                                                                                                                                                                                                                                                                                                                                                                                                                                                                                                                                                                                                                                                                                                                                                                                                                                                                                                                                                                                                                                                                                                                                                                                                                                                                                                                                                                                                                                                                                                                                        |
| DRAM1 | ENSOARGO(C DNA-dama |                                                                                                                                                                                                                                                                                                                                                                                                                                                                                                                                                                                                                                                                                                                                                                                                                                                                                                                                                                                                                                                                                                                                                                                                                                                                                                                                                                                                                                                                                                                                                                                                                                                                                                                                                                                                                                                                                                                                                                                                                                                                                                                                                                                                                                                                                                                                                                                                                                                                                                         |
| PRDM5 | ENSOARGO(C PR domai |                                                                                                                                                                                                                                                                                                                                                                                                                                                                                                                                                                                                                                                                                                                                                                                                                                                                                                                                                                                                                                                                                                                                                                                                                                                                                                                                                                                                                                                                                                                                                                                                                                                                                                                                                                                                                                                                                                                                                                                                                                                                                                                                                                                                                                                                                                                                                                                                                                                                                                         |
| GLB1  | ENSOARGO(C galactos |                                                                                                                                                                                                                                                                                                                                                                                                                                                                                                                                                                                                                                                                                                                                                                                                                                                                                                                                                                                                                                                                                                                                                                                                                                                                                                                                                                                                                                                                                                                                                                                                                                                                                                                                                                                                                                                                                                                                                                                                                                                                                                                                                                                                                                                                                                                                                                                                                                                                                                         |
| DDX17 | ENSOARGO(C DEAD (As | miR-625-5p, miR-2285ab, miR-2387, miR-2285c, miR-6535, miR-544-3p, miR-300-3p, miR-34c-5p, miR-34b, miR-552-3p, miR-126b-5p, miR-221-5p, miR-20a-3p, miR-2284q, novel_1, miR-34c, miR-382-5p, miR-2440, miR-449a, miR-7705, miR-877-3p, miR-224-5p, miR-2285f, miR-3074-2-3p, miR-135a-2-3p, miR-105-2, miR-34a-5p, miR-544a, miR-188-3p, miR-217-5p, miR-125b-2-3p, miR-2300b-3p, miR-532-3p, miR-2459, miR-544b, miR-2285e, miR-2285g, miR-758-5p, miR-105-1, miR-221-5p, miR-34b-5p, miR-105-5p, miR-92a-1-5p, miR-217, miR-224-5p, miR-2285b, miR-490-3p, miR-2478, miR-2285r, miR-2284l, miR-125b-2-3p, miR-382, miR-15b-5p, miR-664a, miR-424-5p, miR-454-3p, miR-2285j, miR-665, miR-324-3p, miR-132-5p, miR-206-3p, miR-346, miR-6134, miR-338-3p, miR-4510, miR-433-5p, miR-665-5p, miR-3074-2-3p, miR-425-5p, miR-1895, miR-625-5p, miR-21a-3p, miR-6130, miR-377-3p, miR-132-5p, miR-15b-5p, miR-155-5p, miR-204-3p, miR-2331-3p, miR-552-3p, novel_107, miR-154a-3p, miR-216b-3p, miR-3065-3p, miR-21-3p, miR-466i-5p, miR-106a, miR-34b-5p, miR-196a-3p, miR-185-3p, miR-500a-5p, miR-324-3p, miR-125b-2-3p, miR-329a-5p, miR-216c-5p, miR-20a, miR-142-3p, miR-19b-3p, miR-34a-5p, miR-378d, miR-148a-5p, miR-133a-3p, miR-2408, miR-362-3p, miR-1246, miR-2300b-3p, novel_133, miR-5703, miR-124-3p, miR-15a-5p, miR-23c, miR-7859, miR-23b-3p, miR-532-3p, miR-106a, miR-548e-3p, miR-3600, miR-4726-5p, miR-2440, miR-2285n, novel_82, miR-2447, miR-147-3p, miR-1983, miR-199b-5p, miR-361-3p, miR-378g, miR-7857-3p, miR-3596, miR-27a-3p, miR-4443, miR-664b, miR-211-5p, miR-2285u, miR-130b-3p, miR-491-5p, miR-199b-5p, miR-342, miR-16b, miR-106b-5p, miR-362-3p, miR-2957, miR-4532, miR-8485, miR-2330-5p, miR-106a-5p, miR-424-5p, miR-574-3p, miR-124a, miR-23a-3p, miR-450b-5p, miR-362-3p, miR-2284aa, miR-329-3p, miR-30b-3p, miR-125b-2-3p, miR-1a-3p, miR-147a, miR-148b-5p, miR-9788-3p, miR-330-3p, novel_4, miR-1343-3p, miR-145b, miR-27a-3p, miR-204-5p, miR-5100, miR-135a-5p, miR-331-3p, miR-1197-3p, miR-1260b, miR-93, miR-365a-5p, miR-16-5p, miR-3607-3p, miR-329a, miR-2474, miR-1248, miR-671-5p, miR-20b-5p, miR-23b, miR-17-5p, miR-93-5p, miR-34c-5p, miR-199a-5p, miR-324-5p, miR-3068-3p, miR-3956, miR-2355-5p, miR-191-3p, novel_96, miR-543-5p, miR-107, miR-125a-3p, miR-664-3p, miR-8117, miR-1260a, miR-30f, miR-148b-5p, miR-2285b, novel_39, miR-3065-3p, miR-199a-5p, miR-1, miR-155-5p, miR-128-3p, miR-1290, miR-322-5p, novel_121, miR- |
| CLCN3 | ENSOARGO(C chloride |                                                                                                                                                                                                                                                                                                                                                                                                                                                                                                                                                                                                                                                                                                                                                                                                                                                                                                                                                                                                                                                                                                                                                                                                                                                                                                                                                                                                                                                                                                                                                                                                                                                                                                                                                                                                                                                                                                                                                                                                                                                                                                                                                                                                                                                                                                                                                                                                                                                                                                         |

miR-134, miR-140-3p, miR-2904, miR-19b-3p, miR-184-3p, miR-105-2, miR-200b-3p, miR-429-3p, miR-106a, miR-222, miR-200b, miR-148b-3p, miR-340-5p, novel\_121, miR-134-5p, miR-200c, miR-219b-5p, miR-200c-3p, miR-106a, miR-152-3p, miR-200a-3p, miR-2484, miR-105-3p, miR-183-5p, miR-20a, miR-369-3p, let-7f-1-3p, miR-21a-3p, miR-17-5p, miR-93-5p, miR-20b-5p, miR-141-3p, miR-301a-3p, miR-222-3p, miR-6516-3p, miR-134-5p, miR-454-3p, miR-323-3p, miR-93, miR-1434-3p, miR-758-3p, miR-125b-2-3p, miR-1388-5p, miR-105-1, miR-130a-3p, miR-539-5p, miR-20b, miR-221-3p, miR-106a-5p, miR-106b-5p, miR-17-5p, miR-197-5p, miR-105-5p, miR-130b-3p, miR-494-3p, miR-106a-5p, miR-1b-5p, miR-758-3p, miR-221, miR-148a-3p, miR-19a-3p, miR-9851-3p, miR-2483-3p, miR-133a-5p, miR-20a-5p, novel\_1, miR-147-5p, miR-301b-3p, miR-374c-5p, miR-502b, miR-4324, miR-2428, novel\_27, miR-9-5p, miR-136-3p, miR-379-5p, miR-378f, miR-335-3p, miR-9851-3p, miR-3963, miR-18a-3p, miR-7857-3p, miR-378e, miR-10a-5p, miR-499b-5p, miR-10b, miR-378b, miR-3074-5p, miR-125a-5p, miR-378a-5p, miR-136-3p, miR-2411-3p, novel\_115, let-7j, miR-432-3p, miR-378d, miR-432-3p, miR-1388-3p, miR-2889, miR-101c, miR-219a-1-3p, miR-30b-3p, miR-378c, miR-30b-3p, miR-450c-3p, miR-22-3p, miR-223-3p, miR-10b, miR-378b, miR-9788-3p, miR-1343-3p, miR-133b-5p, miR-31-5p, miR-486b-3p, miR-6516-3p, miR-664a, miR-450b-3p, miR-320e, miR-125b-5p, miR-410-5p, miR-378c, miR-1197-3p, miR-10b-5p, miR-129-2-3p, miR-3074-5p, miR-378c, miR-485-5p, miR-1248, miR-3154, miR-450a-1-3p, miR-22-3p, miR-10a, miR-552-3p, miR-125a, miR-874-3p, miR-378a-3p, novel\_127, miR-543-5p, miR-30b-3p, miR-127-5p, miR-200c-3p, miR-202-5p, miR-125b, miR-422a, miR-345-3p, miR-200c, novel\_17, miR-143-3p, miR-486-3p, miR-450b-5p, miR-369-3p, miR-10a-5p, miR-200b-3p, miR-378a-3p, miR-5703, miR-3578, miR-2408, miR-378i, miR-345-3p, miR-486-5p, novel\_121, miR-129-1-3p, miR-450a-1-3p, novel\_83, miR-378h, miR-200b, miR-9-5p, miR-505-5p, miR-302a-5p, miR-6517, miR-429-3p, miR-18a-3p, miR-329a-5p, miR-3529-3p, miR-2284f, miR-29b-1-5p, miR-130a-5p, miR-125b-2-3p, miR-181b-1-3p, novel\_39, miR-2432, miR-29a-5p, miR-486-3p, miR-205-5p, miR-500a-5p, miR-34b-5p, miR-222, miR-2284h-5p, miR-582-3p, miR-2300b-3p, miR-2366, miR-5703, miR-140-3p, miR-34a-5p, miR-15b-3p, miR-370-5p, miR-100-3p, miR-665, miR-592, miR-486b-3p, miR-370-5p, miR-182-5p, miR-532-5p, miR-34c-5p, miR-27b-5p, miR-3154, miR-362-5p, miR-345-5p, miR-345-5p, miR-543-3p, miR-652-5p, miR-345-5p, miR-29b-1-5p, miR-182-5p, miR-124-5p, miR-466f-3p, miR-27a-3p, miR-181b-2-3p, miR-221-3p, miR-500-5p, miR-143-5p, miR-2113, miR-30b-3p, miR-374b-3p, miR-30b-3p, miR-1388-5p, miR-219a-1-3p, miR-2426, miR-21b, miR-26a-2-3p, miR-27b-3p, novel\_101, miR-1193, miR-362-5p, miR-449a, miR-2428, miR-218-5p, miR-2440, miR-576-3p, miR-2284o, miR-34c, miR-329-5p, miR-378b, miR-34b, miR-677, miR-27a-3p, miR-181b-3p, miR-221

|      |                   |                                                                                                                                                                                                                                                                                                                                                                                                                                                                                                                                                                                                                                                                                                                                                                                                                                                                                                                                                                                                                                                                                                                                                                                                                                                                                                                                                                                                                                                                                                                                                                                                                                                                                                                                        |
|------|-------------------|----------------------------------------------------------------------------------------------------------------------------------------------------------------------------------------------------------------------------------------------------------------------------------------------------------------------------------------------------------------------------------------------------------------------------------------------------------------------------------------------------------------------------------------------------------------------------------------------------------------------------------------------------------------------------------------------------------------------------------------------------------------------------------------------------------------------------------------------------------------------------------------------------------------------------------------------------------------------------------------------------------------------------------------------------------------------------------------------------------------------------------------------------------------------------------------------------------------------------------------------------------------------------------------------------------------------------------------------------------------------------------------------------------------------------------------------------------------------------------------------------------------------------------------------------------------------------------------------------------------------------------------------------------------------------------------------------------------------------------------|
| GCM2 | ENSOARGO(glial ce | <p>miR-371a-5p, miR-421-5p, miR-342-3p, miR-181d-5p, miR-495-3p, miR-9-3p, miR-150-5p, miR-3970, miR-19a-3p, miR-9-3p, miR-376a-2-5p, miR-493-5p, miR-2319a, miR-10b, miR-20a-3p, miR-378b, miR-2483-3p, miR-4443, miR-377-3p, miR-224-5p, miR-342, miR-2331-5p, miR-378a-5p, miR-101b-3p, miR-493-5p, miR-33a-5p, miR-23a-3p, miR-2285r, miR-491-3p, miR-193a, miR-181a-5p, miR-432, miR-16-1-3p, miR-432-5p, miR-30e-3p, miR-665, miR-30a-3p, miR-31-3p, miR-1306-5p, miR-224-5p, miR-181c-5p, miR-23b, miR-10b-3p, miR-543-3p, miR-3965, miR-377-3p, miR-2284s, miR-200c, miR-6119-5p, miR-8117, miR-200c-3p, miR-466i-5p, miR-181b-5p, miR-30a-3p, miR-376a-5p, miR-421-5p, miR-664b-3p, novel_39, miR-23b-5p, miR-1434-5p, miR-19b-3p, miR-16-1-3p, miR-200b-3p, miR-429-3p, miR-376a-5p, miR-30d-3p, miR-23c, miR-200b, miR-210-3p, miR-23b-3p, novel_121, miR-545-5p</p> <p>miR-1895, miR-885-3p, miR-1827, miR-299, miR-450a-1-3p, miR-27a-5p, miR-3957, miR-378a-3p, miR-3957-5p, miR-99a-3p, miR-450b-3p, miR-664a, miR-486b-3p, miR-99b-3p, miR-6525, miR-206-3p, miR-1260b, miR-378c, novel_42, miR-378c, miR-214, miR-885-3p, miR-378i, miR-2366, miR-1197-5p, miR-378a-3p, miR-378h, miR-450a-1-3p, miR-2284z, miR-6517, miR-431, miR-99a-3p, miR-466i-5p, miR-1260a, miR-422a, miR-185-3p, miR-450b-5p, miR-486-3p, miR-1, miR-495-5p, miR-2284f, miR-378f, miR-3141, miR-378e, miR-669, miR-1185-2-3p, miR-206, miR-142b, miR-2284o, miR-107-5p, miR-24-3p, miR-378c, miR-1260b, miR-101a-5p, miR-378b, miR-296-5p, miR-1a-3p, miR-450c-3p, miR-1185-3p, miR-2300a-5p, miR-1343-3p, novel_124, miR-103a-2-5p, miR-214-3p, miR-431-5p, novel_19, miR-3141, novel_51, miR-378d, miR-127-3p, let-7f-2-3p, let-7f-2-3p</p> |
| EML3 | ENSOARGO(echinode |                                                                                                                                                                                                                                                                                                                                                                                                                                                                                                                                                                                                                                                                                                                                                                                                                                                                                                                                                                                                                                                                                                                                                                                                                                                                                                                                                                                                                                                                                                                                                                                                                                                                                                                                        |

miR-30c-2-3p, miR-339a, miR-200c, miR-17-3p, miR-181b-5p, miR-127-5p, miR-200c-3p, miR-2385-3p, miR-29a-5p, miR-200a, miR-450c-5p, miR-2285b, miR-450b-5p, miR-134, miR-155-5p, miR-200b-3p, miR-10a-5p, miR-582-3p, novel\_79, miR-6517, miR-429-3p, miR-2284z, miR-134-5p, novel\_121, miR-24-2-5p, miR-378h, miR-483-3p, miR-2284k, miR-134-5p, miR-374b-3p, miR-28-5p, miR-331-5p, miR-6128, miR-1306-5p, miR-2284v, miR-378c, miR-374a-3p, miR-488-3p, miR-331-5p, novel\_48, miR-3068-3p, miR-32, novel\_51, miR-7-5p, miR-106b-3p, miR-483-3p, miR-378a-5p, miR-382, miR-2284l, miR-3071-5p, miR-145a-5p, miR-432, miR-7b-5p, miR-181a-5p, miR-1434-3p, miR-2284ab, miR-339-5p, miR-432-5p, miR-2284d, miR-656-5p, miR-22-5p, miR-147-5p, novel\_1, miR-17-3p, miR-342-3p, novel\_120, miR-335-5p, miR-3065-5p, miR-2285ab, miR-378f, miR-379-5p, miR-10a-5p, miR-7-1-3p, miR-3120-3p, miR-216b-3p, miR-323a-5p, miR-411b-3p, novel\_69, miR-216a-5p, miR-500a-5p, miR-422a, miR-185-3p, miR-196a-3p, miR-210-5p, novel\_17, miR-30b-3p, miR-202-5p, miR-2432, miR-143-3p, miR-376a-5p, miR-2904, miR-378a-3p, miR-378i, miR-193b-5p, miR-376a-5p, miR-133a-3p, miR-361-5p, novel\_73, miR-33b-3p, miR-199a-3p, miR-200b, miR-222-5p, miR-324-3p, miR-664a-5p, miR-338-5p, miR-320e, miR-2285j, miR-4492, miR-500, miR-708-5p, miR-155-5p, miR-17-3p, miR-425-5p, miR-539-5p, miR-378c, miR-4510, miR-3184-3p, miR-181c-5p, miR-6525, miR-10b-5p, miR-500a-3p, miR-21a-3p, miR-1827, miR-2312, miR-339b, miR-545-3p, miR-32-5p, miR-378a-3p, miR-504-5p, miR-30c-1-3p, miR-204-3p, novel\_25, miR-877-5p, miR-155-5p, miR-2284s, miR-10a, miR-139-5p, miR-6130, miR-323-5p, miR-342, miR-199a-3p, miR-1388-3p, miR-101b-3p, miR-378d, miR-30c-1-3p, miR-7857, miR-3962, miR-378b, miR-484, miR-10b, miR-301b-5p, miR-2284aa, miR-3120-5p, miR-378c, miR-145b, novel\_4, miR-1343-3p, miR-0788-3p, miR-433-5p, miR-378c, miR-214, miR-6134, miR-3184-5p, miR-378c, miR-2433, miR-324-3p, miR-125b-5p, miR-6740-5p, miR-17-3p, miR-28-5p, miR-4492, miR-708-5p, miR-221-5p, miR-504-5p, miR-378a-3p, miR-125a, miR-141-3p, miR-34c-5p, miR-154b-5p, miR-22-3p, miR-339b, miR-485-5p, miR-125a-3p, miR-210-5p, miR-125b, miR-339a, miR-185-3p, miR-422a, miR-324-3p, miR-2898, miR-450a-2-3p, miR-17-3p, novel\_127, novel\_96, miR-200a-3p, miR-34b-5p, miR-221-5p, miR-18a-3p, miR-2285ad, miR-1224-5p, novel\_79, miR-378h, miR-214-5p, miR-378i, miR-615-3p, miR-5703, miR-378a-3p, miR-1343-5p, miR-124-3p, miR-34a-5p, miR-541-3p, miR-3956-3p, miR-135a-2-3p, novel\_60, miR-17-3p, miR-1296-5p, miR-24-3p, miR-361-3p, miR-449a, miR-423-5p, miR-615, miR-2440, miR-2285y, miR-34c, miR-4726-5p, miR-199c, miR-2319b, miR-34b, miR-378e, miR-4443, miR-2387, miR-18a-3p, miR-504, miR-378f, miR-124a, miR-744-3p, miR-654-3p, miR-378d, miR-4532, novel\_51, miR-505, miR-491-5p, miR-378a-5p, miR-214-3p, miR-125a-5p, miR-1343-5p, novel\_4, miR-199b-3p, miR-339-5p, miR-1298-3p, miR-194-3p, miR-541, miR-143-5p, miR-378b, miR-30b-3p, miR-22-3p, miR-7857, miR-30b-3p, miR-1388-5p, miR-378c

SEC16B ENSOARGO(SEC16 homolog) 3p, novel\_69, miR-216a-5p, miR-500a-5p, miR-422a, miR-185-3p, miR-196a-3p, miR-210-5p, novel\_17, miR-30b-3p, miR-202-5p, miR-2432, miR-143-3p, miR-376a-5p, miR-2904, miR-378a-3p, miR-378i, miR-193b-5p, miR-376a-5p, miR-133a-3p, miR-361-5p, novel\_73, miR-33b-3p, miR-199a-3p, miR-200b, miR-222-5p, miR-324-3p, miR-664a-5p, miR-338-5p, miR-320e, miR-2285j, miR-4492, miR-500, miR-708-5p, miR-155-5p, miR-17-3p, miR-425-5p, miR-539-5p, miR-378c, miR-4510, miR-3184-3p, miR-181c-5p, miR-6525, miR-10b-5p, miR-500a-3p, miR-21a-3p, miR-1827, miR-2312, miR-339b, miR-545-3p, miR-32-5p, miR-378a-3p, miR-504-5p, miR-30c-1-3p, miR-204-3p, novel\_25, miR-877-5p, miR-155-5p, miR-2284s, miR-10a, miR-139-5p, miR-6130, miR-323-5p, miR-342, miR-199a-3p, miR-1388-3p, miR-101b-3p, miR-378d, miR-30c-1-3p, miR-7857, miR-3962, miR-378b, miR-484, miR-10b, miR-301b-5p, miR-2284aa, miR-3120-5p, miR-378c, miR-145b, novel\_4, miR-1343-3p, miR-0788-3p, miR-433-5p, miR-378c, miR-214, miR-6134, miR-3184-5p, miR-378c, miR-2433, miR-324-3p, miR-125b-5p, miR-6740-5p, miR-17-3p, miR-28-5p, miR-4492, miR-708-5p, miR-221-5p, miR-504-5p, miR-378a-3p, miR-125a, miR-141-3p, miR-34c-5p, miR-154b-5p, miR-22-3p, miR-339b, miR-485-5p, miR-125a-3p, miR-210-5p, miR-125b, miR-339a, miR-185-3p, miR-422a, miR-324-3p, miR-2898, miR-450a-2-3p, miR-17-3p, novel\_127, novel\_96, miR-200a-3p, miR-34b-5p, miR-221-5p, miR-18a-3p, miR-2285ad, miR-1224-5p, novel\_79, miR-378h, miR-214-5p, miR-378i, miR-615-3p, miR-5703, miR-378a-3p, miR-1343-5p, miR-124-3p, miR-34a-5p, miR-541-3p, miR-3956-3p, miR-135a-2-3p, novel\_60, miR-17-3p, miR-1296-5p, miR-24-3p, miR-361-3p, miR-449a, miR-423-5p, miR-615, miR-2440, miR-2285y, miR-34c, miR-4726-5p, miR-199c, miR-2319b, miR-34b, miR-378e, miR-4443, miR-2387, miR-18a-3p, miR-504, miR-378f, miR-124a, miR-744-3p, miR-654-3p, miR-378d, miR-4532, novel\_51, miR-505, miR-491-5p, miR-378a-5p, miR-214-3p, miR-125a-5p, miR-1343-5p, novel\_4, miR-199b-3p, miR-339-5p, miR-1298-3p, miR-194-3p, miR-541, miR-143-5p, miR-378b, miR-30b-3p, miR-22-3p, miR-7857, miR-30b-3p, miR-1388-5p, miR-378c

GRINA ENSOARGO( glutamate) 541-3p, miR-3956-3p, miR-135a-2-3p, novel\_60, miR-17-3p, miR-1296-5p, miR-24-3p, miR-361-3p, miR-449a, miR-423-5p, miR-615, miR-2440, miR-2285y, miR-34c, miR-4726-5p, miR-199c, miR-2319b, miR-34b, miR-378e, miR-4443, miR-2387, miR-18a-3p, miR-504, miR-378f, miR-124a, miR-744-3p, miR-654-3p, miR-378d, miR-4532, novel\_51, miR-505, miR-491-5p, miR-378a-5p, miR-214-3p, miR-125a-5p, miR-1343-5p, novel\_4, miR-199b-3p, miR-339-5p, miR-1298-3p, miR-194-3p, miR-541, miR-143-5p, miR-378b, miR-30b-3p, miR-22-3p, miR-7857, miR-30b-3p, miR-1388-5p, miR-378c

miR-449a, miR-24-3p, miR-211, miR-49b-3p, novel\_101, miR-136-3p, novel\_120, miR-382-5p, miR-34c, miR-16a, miR-502-5p, miR-15a, miR-34b, miR-320b, miR-655-5p, miR-6395, miR-195a-5p, miR-9851-3p, miR-18a-3p, miR-2387, miR-539-3p, miR-363-5p, miR-130b-5p, miR-126a-3p, miR-125a-5p, miR-660, miR-1343-5p, miR-124-5p, miR-503-5p, miR-544b, miR-503-5p, miR-377-5p, miR-744-5p, miR-1260b, miR-1285, miR-365a-5p, miR-378c, miR-145-3p, miR-500b-5p, miR-3607-3p, miR-486b-3p, miR-28-5p, miR-204-5p, miR-331-3p, miR-135a-1-3p, miR-1306-3p, miR-34c-5p, miR-141-3p, miR-370-3p, miR-485-5p, miR-7144-5p, miR-362-5p, miR-320a, miR-3154, miR-3065-3p, miR-4286, miR-543-5p, miR-191-3p, miR-339a, miR-1260a, miR-214-5p, miR-378h, miR-1271-5p, miR-128-3p, miR-134, miR-615-3p, miR-362-5p, miR-452-5p, miR-541-3p, novel\_60, miR-3059-5p, miR-2285t, miR-4726-5p, miR-107-5p, miR-2285y, miR-2285n, miR-454-5p, miR-378e, miR-7977, miR-499b-5p, miR-3064-5p, novel\_94, miR-877-3p, miR-361-3p, miR-4532, let-7c-3p, miR-424-5p, miR-2330-5p, miR-25-5p, miR-3085-3p, miR-362-3p, miR-5126, miR-320b, miR-500-5p, novel\_4, miR-3120-5p, miR-544a, miR-2426, miR-378c, miR-296-5p, miR-484, miR-6529a, miR-378b, miR-6134, miR-29c-5p, miR-3074-2-3p, miR-1271, miR-378c, miR-708-5p, miR-424-5p, miR-664a, miR-324-3p, miR-369-5p, miR-29d-5p, miR-22-3p, miR-193b-3p, miR-544-3p, miR-3065-3p, miR-660-5p, miR-221-5p, miR-378a-3p, miR-21a-3p, miR-2432, miR-125b-2-3p, miR-21-3p, miR-30b-3p, miR-34b-5p, miR-221-5p, miR-466i-5p, miR-320d, miR-125b, miR-196a-3p, novel\_83, miR-616-3p, miR-15a-5p, miR-487a-3p, miR-485-3p, miR-378d, miR-941, miR-4429, miR-1197-5p, miR-188-3p, miR-140-3p, miR-5703, miR-1193, miR-2300b-3p, miR-362-3p, miR-758-5p, miR-193b-3p, miR-6123, miR-181b-3p, miR-6535, miR-677, miR-669, miR-320c, miR-374c-3p, miR-3074-5p, novel\_68, miR-378f, miR-216a-3p, miR-138-5p, miR-155-5p, miR-191-5p, miR-486b-3p, miR-592, miR-885-5p, miR-3184-3p, miR-3607-3p, miR-144-5p, miR-199b-5p, miR-2387, miR-199b-5p, miR-107, miR-3074-1-3p, miR-493-5p, miR-1827, miR-2355-5p, miR-374c-3p, miR-300-3p, miR-199a-5p, miR-125a-3p, miR-105-5p, miR-216a-5p, miR-199b-5p, miR-30b-3p, miR-107, miR-1388-3p, miR-493-5p, miR-654-3p, miR-125b-2-3p, miR-200a, miR-199a-5p, miR-486-3p, miR-1b-5p, miR-191, miR-223-3p, miR-138, miR-2426, miR-105-2, miR-1839-5p, miR-155-5p, miR-103a-3p, miR-105-1, miR-1343-3p, miR-149-5p, miR-545-5p, novel\_121, miR-103, miR-214-5p

SSSCA1 ENSOARGO(Sjogren)

SDCBP ENSOARGO(syndecan)

miR-301a-5p, miR-4726-5p, miR-541-3p, miR-3059-5p, miR-2447, miR-452-5p, miR-361-3p, miR-423-5p, miR-361-3p, miR-504, miR-668-5p, miR-147-3p, miR-24-1-5p, miR-7689-3p, miR-652-3p, novel\_103, miR-320b, miR-106b-5p, miR-362-3p, novel\_19, miR-25-5p, miR-130b-3p, miR-542-5p, miR-214-3p, miR-106a-5p, miR-1388-3p, miR-744-3p, miR-30c-1-3p, miR-491-3p, miR-2310, miR-301b-5p, miR-541, miR-329-3p, miR-2284r, miR-484, miR-3962, miR-299a-5p, miR-2426, miR-362-3p, miR-3120-5p, miR-1343-3p, novel\_78, miR-2320-3p, miR-539-5p, miR-147a, miR-3604, miR-665, miR-664a, miR-454-3p, miR-145a-3p, miR-4510, miR-214, miR-665-5p, novel\_44, miR-3184-5p, miR-299, miR-345-5p, miR-885-3p, miR-1895, miR-504-5p, miR-30c-1-3p, miR-552-3p, miR-3065-3p, miR-6130, miR-582-5p, miR-301a-3p, miR-204-3p, miR-542-5p, miR-210-5p, miR-125b, miR-185-3p, miR-324-3p, miR-99a-3p, miR-760-3p, miR-320d, miR-106a, miR-34b-5p, miR-30b-3p, miR-20a, miR-377-5p, miR-125b-2-3p, miR-486-3p, miR-2424, miR-2300b-3p, miR-362-3p, miR-2366, miR-2408, novel\_133, miR-140-3p, miR-33b-3p, miR-19b-3p, miR-4429, miR-378d, miR-34a-5p, miR-106a, miR-18a-3p, miR-328-3p, miR-20a-5p, miR-28c, miR-6529b, miR-1247-3p, miR-382-5p, miR-34c, miR-376a-3p, novel\_101, miR-542-5p, miR-24-3p, miR-2284w, miR-301b-3p, miR-449a, miR-18a-3p, miR-19a-3p, miR-1291, miR-450b-3p, miR-6395, novel\_68, miR-320b, miR-670-3p, miR-34b, miR-320c, miR-7-5p, miR-17-5p, novel\_51, miR-106a-5p, miR-378a-5p, miR-196b-5p, miR-125a-5p, miR-432-3p, miR-654-3p, miR-345-5p, miR-539-3p, miR-542-3p, miR-7b-5p, miR-2113, miR-873a-5p, miR-1260b, miR-138, miR-2889, miR-377-5p, miR-130a-3p, miR-185-5p, miR-20b, miR-194-3p, miR-149-5p, miR-99b-3p, miR-410-5p, miR-125b-5p, miR-138-5p, miR-486b-3p, miR-134-5p, miR-1260b, miR-93, miR-331-5p, miR-17-5p, miR-320a, miR-93-5p, miR-320a, miR-345-5p, miR-1814c, miR-671-3p, miR-148b-5p, novel\_116, novel\_78, miR-151a-3p, miR-130a-3p, novel\_79, miR-339-5p, miR-101a-5p, miR-16-1-3p, miR-19b-3p, miR-148a-5p, miR-10a-5p, miR-16-1-3p, miR-10b, miR-376c-3p, miR-216c-5p, miR-195a-3p, miR-339a, miR-139-5p, miR-376e-3p, miR-301a-3p, miR-10a, miR-376c-3p, miR-3068-3p, miR-139-5p, miR-10a-5p, miR-339b, miR-186-5p, miR-1827, miR-9-3p, miR-7144-5p, miR-655, miR-10b-5p, miR-3956-3p, novel\_60, novel\_1, miR-454-3p, miR-2332, miR-135a-1-3p, miR-382-3p, novel\_82, miR-655-3p, miR-151-3p, miR-208b-5p, miR-874-5p, miR-154-3p, miR-130b-5p, miR-6516-3p, miR-379-3p, miR-29b-2-5p, miR-6525, miR-3074-1-3p, novel\_94, miR-1814c, miR-6516-3p, miR-154b-3p, miR-200a-5p, miR-433-3p, miR-381-3p, miR-499a-3p, miR-499b-3p, miR-299b-3p, miR-216b-5p, miR-2483-3p, miR-154a-3p, miR-487a-3p, miR-3068-3p, miR-20a-3p, miR-299-3p, novel\_96, miR-491-5p, miR-1185-5p, miR-466i-5p, miR-500a-5p, miR-29b-1-5p, miR-539-3p, miR-2285b, miR-2310, miR-29b-1-5p, miR-29b-2-5p, miR-4286, miR-130b-5p, miR-487a, miR-16-1-3p, miR-16-2-3p, miR-493-3p, miR-16-1-3p, miR-300, miR-1434-3p, miR-487a-3p, miR-26b-3p, miR-485-3p, miR-299a-3p, miR-2428, miR-4532, miR-148b-3p, miR-665-5p, miR-152-3p, miR-502b, miR-148a-3p, novel\_17, miR-1434-3p, miR-143-5p

BPTF ENSOARGO(bromodom: miR-2285g, miR-376a-5p, miR-2483-3p, miR-149-5p, miR-2285e, miR-345-3p, miR-2285c, miR-2411-3p, miR-10b-3p, novel\_74, miR-1388-5p, miR-378c, miR-3074-5p, miR-3074-2-3p, miR-2330-3p, miR-206-3p, miR-346, miR-30e-3p, miR-30a-3p, miR-132-5p, miR-324-3p, miR-29b-2-5p, miR-155-5p, miR-664a, miR-500, miR-874-5p, miR-378a-3p, miR-216b-3p, miR-323-5p, miR-22-3p, novel\_32, miR-155-5p, miR-500a-3p, let-7g-3p, miR-18a-5p, miR-885-3p, miR-216c-5p, miR-20a, miR-2887, miR-376a-5p, miR-29b-1-5p, miR-377-5p, novel\_17, miR-210-5p, miR-324-3p, miR-422a, miR-106a, miR-99a-3p, miR-106a, miR-212-5p, miR-30d-3p, miR-23b-3p, miR-23c, miR-671-3p, miR-199a-3p, miR-378i, miR-1197-5p, miR-378a-3p, miR-140-3p, miR-188-3p, novel\_73, novel\_60, miR-3956-3p, miR-541-3p, miR-452-5p, miR-361-3p, miR-1285-5p, miR-8095, miR-7705, miR-382-3p, miR-2285n, miR-3064-5p, miR-4792, miR-541-5p, miR-7977, miR-378e, miR-203-3p, miR-27a-3p, miR-299b-5p, miR-668-5p, novel\_94, miR-1388-3p, miR-106a-5p, miR-23a-3p, miR-378d, miR-3187-3p, miR-4532, miR-2310, miR-199a-3p, miR-431-5p, miR-505, miR-29b-1-5p, miR-106b-5p, miR-3085-3p, miR-3955-3p, novel\_4, miR-330-3p, miR-27a-3p, miR-378b, miR-484, miR-541, miR-1a-3p, miR-378c, miR-3120-5p, miR-193a-5p, miR-93, miR-1260b, miR-378c, novel\_63, miR-99b-3p, miR-135a-5p, novel\_9, miR-99a-3p, miR-3965, miR-488-3p, miR-93-5p, miR-200a-5p, miR-18a, miR-23b, miR-17-5p, miR-20b-5p, miR-1814c, miR-30a-3p, miR-1, miR-29b-2-5p, miR-3064-5p, miR-4286, miR-1271-3p, miR-205-5p, miR-1260a, miR-125a-3p, miR-431, miR-18b-5p, miR-505-5p, miR-483-3p, miR-378h, miR-582-3p, miR-1290, miR-885-3p, miR-155-5p, miR-24-3p, miR-2428, miR-142b, miR-20a-5p, miR-128-1-5p, miR-206, miR-656-5p, miR-3074-5p, miR-320b, miR-323a-5p, miR-669, miR-2387, miR-18b, miR-3970, miR-21c, miR-1291, miR-2319a, miR-9851-3p, miR-378f, miR-135b-5p, miR-6240, miR-330-3p, miR-17-5p, miR-106a-5p, miR-483-3p, miR-665, miR-377-5p, miR-432-5p, miR-20b, miR-873a-

PRPF19 ENSOARGO(pre-mRNA



miR-1290, miR-330-5p, miR-885-3p, miR-429-3p, miR-6517, miR-322-5p, miR-2284z, miR-134-5p, miR-450a-1-3p, miR-486-5p, miR-127-5p, novel\_127, novel\_96, miR-200a-3p, novel\_39, miR-2285b, miR-93-5p, miR-876-3p, miR-329b, miR-20b-5p, miR-3068-3p, miR-874-3p, miR-2284k, miR-6740-5p, miR-134-5p, miR-2284v, miR-16-5p, miR-1260b, miR-708-3p, miR-542-3p, miR-450c-3p, miR-197-3p, miR-16b, miR-381-5p, miR-497-5p, miR-31-5p, miR-103a-3p, miR-3535, miR-194-3p, miR-365b-5p, novel\_51, miR-194a, miR-2411-3p, miR-378a-5p, miR-483-3p, miR-380-5p, miR-493-5p, let-7f-2-3p, let-7f-2-3p, miR-432-3p, miR-2285r, miR-432-3p, miR-2284l, let-7j, miR-3065-5p, miR-2319a, miR-378f, novel\_68, miR-329-5p, miR-374c-3p, novel\_69, miR-677, miR-320c, miR-669, miR-181b-3p, miR-1247-3p, miR-29a, miR-335-5p, miR-1839-3p, miR-29c-3p, miR-2284w, miR-378i, miR-378a-3p, miR-493-3p, miR-34a-5p, miR-18a-3p, miR-106a, miR-212-5p, miR-618, miR-345-3p, miR-422a, miR-329a-5p, miR-345-3p, miR-376a-5p, miR-181b-1-3p, miR-486-3p, miR-2285c, miR-450a-1-3p, miR-433-3p, miR-1895, miR-885-3p, miR-1827, miR-504-5p, miR-548o-3p, miR-552-3p, miR-296-3p, miR-15b-5p, miR-30e-3p, miR-3604, miR-665, novel\_74, miR-4492, miR-874-5p, miR-130b-5p, miR-6525, miR-122-5p, miR-323b, miR-181b-2-3p, miR-153, miR-147a, miR-1298-3p, miR-1185-3p, miR-199a-3p, miR-323b-3p, miR-106b-5p, miR-16b, miR-1185-5p, miR-491-5p, miR-153-3p, miR-103a-2-5p, miR-381-5p, miR-744-3p, miR-378d, miR-8485, miR-2310, miR-378j, miR-3963, miR-504, miR-335-3p, miR-493-5p, miR-9-3p, miR-24-1-5p, miR-2319b, miR-2285u, miR-211-5p, miR-25, miR-1185-2-3p, miR-218-5p, miR-499a-5p, miR-628-3p, miR-2447, miR-3956-3p, miR-2284j, miR-877-3p, novel\_111, miR-345-3p, miR-134, miR-29d-3p, miR-200b-3p, miR-378h, miR-483-3p, miR-2411-5p, miR-2285af, miR-1260a, miR-6110-5p, miR-200c, miR-450a-2-3p, miR-

|       |                   |                                                                                                                                                                                                                                                                                                                                                                                                                                                                                                                                                                                                                                                                                                                                                                                                                                                                                                                                                                                                                                                                                                                                                                                                                                                                                                                                                                                                                                                                                                                                                                                                                                                                                                                                                                                                                                                                                                                                                                                                                                                                                                                                                         |
|-------|-------------------|---------------------------------------------------------------------------------------------------------------------------------------------------------------------------------------------------------------------------------------------------------------------------------------------------------------------------------------------------------------------------------------------------------------------------------------------------------------------------------------------------------------------------------------------------------------------------------------------------------------------------------------------------------------------------------------------------------------------------------------------------------------------------------------------------------------------------------------------------------------------------------------------------------------------------------------------------------------------------------------------------------------------------------------------------------------------------------------------------------------------------------------------------------------------------------------------------------------------------------------------------------------------------------------------------------------------------------------------------------------------------------------------------------------------------------------------------------------------------------------------------------------------------------------------------------------------------------------------------------------------------------------------------------------------------------------------------------------------------------------------------------------------------------------------------------------------------------------------------------------------------------------------------------------------------------------------------------------------------------------------------------------------------------------------------------------------------------------------------------------------------------------------------------|
| XRCC4 | ENSOARGO(X-ray re | <p>miR-19b-3p, miR-5703, miR-215-5p, miR-2300b-3p, miR-340-5p, miR-30d-3p, miR-505-3p, miR-3600, miR-2424, miR-376c-3p, miR-376a-5p, miR-1827, miR-18a-5p, miR-339b, miR-30f, miR-433-3p, miR-500a-3p, miR-204-3p, miR-323-5p, miR-376e-3p, miR-27a-5p, miR-6516, miR-192-5p, miR-129-5p, miR-500, miR-29b-2-5p, miR-338-5p, miR-30a-3p, miR-30e-3p, miR-2285j, miR-3074-2-3p, miR-3184-3p, miR-450b-5p, miR-1388-5p, miR-1185-3p, miR-216a-3p, miR-153, miR-27a-3p, miR-145b, miR-2300a-5p, miR-153-3p, miR-505, miR-2310, miR-33a-5p, let-7c-3p, novel_94, miR-493-5p, miR-668-5p, miR-129b-5p, miR-378j, miR-1185-2-3p, miR-27a-3p, miR-203-3p, miR-20a-3p, miR-2284q, miR-628-3p, miR-371a-5p, miR-2285y, miR-101-3p, miR-3956-3p, novel_60, miR-2447, miR-128-3p, miR-134, miR-196a-5p, miR-545-5p, miR-134-5p, miR-6516-5p, miR-18b-5p, novel_79, miR-2285ad, miR-200a-3p, miR-2898, miR-28-3p, miR-339a, miR-1957a, miR-200a, miR-450b-5p, miR-30a-3p, miR-29b-2-5p, miR-1814c, miR-671-5p, novel_48, miR-190a-3p, miR-2318, miR-10b-3p, miR-18a, miR-2448-3p, miR-331-5p, miR-488-3p, miR-376c-3p, miR-2284n, miR-215-5p, miR-141-3p, miR-134-5p, miR-331-5p, miR-100-3p, miR-145-3p, miR-6128, miR-193a-5p, miR-28a-3p, miR-27b-3p, miR-219a-1-3p, miR-380-3p, miR-145a-5p, miR-432, miR-708-3p, miR-2355-3p, miR-185-5p, miR-3431, miR-432-5p, miR-2284d, miR-339-5p, miR-31-5p, miR-466f-3p, miR-378a-5p, miR-196b-5p, miR-2284l, let-7f-2-3p, let-7f-2-3p, miR-380-5p, miR-505-3p, miR-2319a, miR-19a-3p, miR-216a-3p, miR-18b, miR-670-3p, miR-323a-5p, miR-320b, miR-363, miR-625-3p, miR-421-5p, novel_1, miR-6119-3p, novel_87, miR-576-3p, novel_27, miR-2285x, miR-135a-2-3p</p> <p>miR-4443, miR-1185-2-3p, miR-378g, miR-2404, miR-3120-3p, novel_94, miR-1814c, miR-129b-5p, novel_27, miR-2428, miR-2285x, miR-4492, miR-199c, miR-664a, miR-3604, miR-2285j, novel_121, miR-1185-3p, miR-7859, miR-539-5p, miR-134-3p, miR-5010-3p, miR-548e-3p, miR-199b-3p, miR-2426, miR-124-3p, miR-218-2-3p, miR-1193, miR-1434-3p, miR-193a, miR-2432, miR-2310, miR-432-3p, miR-421-5p, miR-628-5p, miR-124a, miR-101b-3p, miR-2285af</p> |
| VCAN  | ENSOARGO(versican |                                                                                                                                                                                                                                                                                                                                                                                                                                                                                                                                                                                                                                                                                                                                                                                                                                                                                                                                                                                                                                                                                                                                                                                                                                                                                                                                                                                                                                                                                                                                                                                                                                                                                                                                                                                                                                                                                                                                                                                                                                                                                                                                                         |

|       |                     |                                                                                                                                                                                                                                                                                                                                                                                                                                                                                                                                                                                                                                                                                                                                                                                                                                                                                                                                                                                                                                                                                                                                                                                                                                                                                                                                                                                                                                                                                                                                                                                                                                                                                                                                                                                                                                                                                                                                                                                                                                                                                                                                                                                                                                                                                                                                                                                                                                                                                                                                                                                           |
|-------|---------------------|-------------------------------------------------------------------------------------------------------------------------------------------------------------------------------------------------------------------------------------------------------------------------------------------------------------------------------------------------------------------------------------------------------------------------------------------------------------------------------------------------------------------------------------------------------------------------------------------------------------------------------------------------------------------------------------------------------------------------------------------------------------------------------------------------------------------------------------------------------------------------------------------------------------------------------------------------------------------------------------------------------------------------------------------------------------------------------------------------------------------------------------------------------------------------------------------------------------------------------------------------------------------------------------------------------------------------------------------------------------------------------------------------------------------------------------------------------------------------------------------------------------------------------------------------------------------------------------------------------------------------------------------------------------------------------------------------------------------------------------------------------------------------------------------------------------------------------------------------------------------------------------------------------------------------------------------------------------------------------------------------------------------------------------------------------------------------------------------------------------------------------------------------------------------------------------------------------------------------------------------------------------------------------------------------------------------------------------------------------------------------------------------------------------------------------------------------------------------------------------------------------------------------------------------------------------------------------------------|
| UBE3B | ENSOARGO(ubiquitin) | <p>miR-191, novel_133, miR-378i, miR-23b-5p, miR-378a-3p, miR-2904, miR-33b-3p, miR-18a-3p, miR-1224-5p, miR-3600, miR-2411-5p, miR-378h, miR-24-2-5p, miR-210-5p, miR-422a, miR-125b, miR-3601, miR-127-5p, novel_127, miR-21-3p, miR-345-3p, miR-2887, miR-4286, miR-3064-5p, miR-495-5p, miR-130a-5p, miR-24-2-5p, miR-3065-3p, miR-2411, miR-21a-3p, miR-329b, miR-485-5p, miR-23a-5p, miR-874-3p, miR-378a-3p, miR-296-3p, miR-125a, miR-3065-3p, miR-21-3p, miR-2355-5p, miR-2433, miR-29d-5p, miR-331-3p, miR-324-3p, miR-125b-5p, miR-138-5p, miR-191-5p, miR-487a-5p, miR-145a-3p, miR-378c, miR-214, miR-29c-5p, miR-378c, miR-365a-5p, miR-1843b-5p, miR-484, miR-378b, miR-758-3p, miR-2426, miR-138, miR-1388-5p, miR-378c, miR-4508, miR-409b, miR-1343-3p, miR-31-5p, miR-3431, miR-2320-3p, miR-153, miR-9788-3p, miR-365b-5p, miR-3085-3p, miR-214-3p, miR-125a-5p, miR-153-3p, miR-376b, miR-378d, miR-758-3p, miR-4532, miR-3591-3p, miR-18a-3p, miR-150-5p, miR-412-3p, miR-450b-3p, miR-1983, miR-378f, miR-2319b, miR-3064-5p, miR-24-1-5p, miR-541-5p, miR-320b, miR-378e, miR-4324, novel_82, miR-335, miR-2285t, miR-7134-3p, miR-335-5p, miR-371b-3p, miR-2284w, miR-8095</p> <p>miR-145b, miR-429-3p, miR-105-1, miR-2300a-5p, miR-3955-5p, novel_121, miR-134-3p, miR-330-5p, miR-30b-3p, miR-145a-5p, miR-1290, miR-296-5p, miR-218-1-3p, miR-105-2, miR-300, miR-411-3p, miR-30b-3p, miR-494-3p, miR-130b-5p, miR-1b-5p, miR-193a, miR-8485, miR-2478, novel_51, miR-125b, miR-105-5p, miR-200c, miR-326, miR-214-3p, miR-543-5p, miR-125a-5p, miR-1a-2-5p, miR-200c-3p, miR-125a, miR-7-1-3p, miR-216b-3p, miR-2483-3p, miR-378g, miR-3065-5p, miR-381-3p, miR-214, miR-6128, miR-1a-1-5p, miR-326-3p, miR-374a-3p, miR-125b-5p, novel_63, miR-218-5p, miR-1-5p, miR-130b-5p, miR-374b-3p, miR-379-3p, miR-6119-3p</p> <p>miR-6525, miR-5100, miR-23a-3p, miR-2284q, miR-592, miR-450a-2-3p, miR-324-3p, miR-2285af, miR-216a-3p, miR-23b-3p, miR-23c, miR-3431, novel_94, miR-2427, miR-23b, miR-1434-3p, miR-1290</p> <p>miR-1843b-5p, miR-134, miR-873a-5p, miR-296-5p, miR-2426, miR-378d, miR-2284x, miR-133a-3p, miR-6517, novel_78, miR-18a-3p, miR-665, miR-2411-5p, miR-134-5p, miR-664-3p, novel_127, miR-214-3p, miR-143-3p, miR-2411, miR-193a, miR-376b-5p, miR-361-3p, miR-376c-5p, miR-18a-3p, miR-876-3p, miR-376c-5p, miR-378b, miR-874-3p, miR-4792, miR-664b, miR-2404, miR-324-5p, miR-2440, novel_63, miR-425-5p, miR-664a, miR-3958-3p, miR-134-5p, novel_101, miR-214, miR-219a-5p, miR-193a-5p, miR-346, miR-1197-3p, miR-6134</p> |
| DNAH8 | ENSOARGO(dynein)    |                                                                                                                                                                                                                                                                                                                                                                                                                                                                                                                                                                                                                                                                                                                                                                                                                                                                                                                                                                                                                                                                                                                                                                                                                                                                                                                                                                                                                                                                                                                                                                                                                                                                                                                                                                                                                                                                                                                                                                                                                                                                                                                                                                                                                                                                                                                                                                                                                                                                                                                                                                                           |
| G3BP2 | ENSOARGO(GTPase a)  |                                                                                                                                                                                                                                                                                                                                                                                                                                                                                                                                                                                                                                                                                                                                                                                                                                                                                                                                                                                                                                                                                                                                                                                                                                                                                                                                                                                                                                                                                                                                                                                                                                                                                                                                                                                                                                                                                                                                                                                                                                                                                                                                                                                                                                                                                                                                                                                                                                                                                                                                                                                           |
| KCNH8 | ENSOARGO(potassium) |                                                                                                                                                                                                                                                                                                                                                                                                                                                                                                                                                                                                                                                                                                                                                                                                                                                                                                                                                                                                                                                                                                                                                                                                                                                                                                                                                                                                                                                                                                                                                                                                                                                                                                                                                                                                                                                                                                                                                                                                                                                                                                                                                                                                                                                                                                                                                                                                                                                                                                                                                                                           |

|       |                   |                                                                                                                                                                                                                                                                                                                                                                                                                                                                                                                                                                                                                                                                                                                                                                                                                                                                                                                                                                                                                                                                                                                                                                                                                                                                                                                                                                                                                                                                                                                                                                                                                                                                                                                                                                                                                                                                                                                                                                                                                                                                                                                                                                                                                                                                                                                                                                                                                                                                                                                                   |
|-------|-------------------|-----------------------------------------------------------------------------------------------------------------------------------------------------------------------------------------------------------------------------------------------------------------------------------------------------------------------------------------------------------------------------------------------------------------------------------------------------------------------------------------------------------------------------------------------------------------------------------------------------------------------------------------------------------------------------------------------------------------------------------------------------------------------------------------------------------------------------------------------------------------------------------------------------------------------------------------------------------------------------------------------------------------------------------------------------------------------------------------------------------------------------------------------------------------------------------------------------------------------------------------------------------------------------------------------------------------------------------------------------------------------------------------------------------------------------------------------------------------------------------------------------------------------------------------------------------------------------------------------------------------------------------------------------------------------------------------------------------------------------------------------------------------------------------------------------------------------------------------------------------------------------------------------------------------------------------------------------------------------------------------------------------------------------------------------------------------------------------------------------------------------------------------------------------------------------------------------------------------------------------------------------------------------------------------------------------------------------------------------------------------------------------------------------------------------------------------------------------------------------------------------------------------------------------|
| PDIA6 | ENSOARGO( protein | <p>miR-2284j, miR-16-5p, miR-2284v, miR-4510, miR-338-5p, miR-664a-5p, miR-16a, miR-2284k, miR-15a, miR-424-5p, novel_74, miR-2284g, miR-2284n, miR-15b-5p, miR-320c, miR-6130, miR-6516, miR-376b-3p, miR-23b, miR-320a, miR-150-5p, novel_99, miR-195a-5p, miR-2284b, miR-23a-3p, miR-195a-3p, miR-424-5p, miR-2284a, miR-2284y, miR-29a-5p, miR-125b-2-3p, miR-16b, miR-2285p, miR-210-5p, miR-320b, miR-376b-3p, miR-320d, miR-2284m, miR-421, miR-376b-3p, miR-15a-5p, miR-6516-5p, miR-322-5p, miR-23b-3p, miR-2284d, miR-3071-5p, miR-23b-5p, miR-2904, miR-2366, miR-2284u, miR-497-5p, miR-4429, miR-16b, miR-2284ab</p> <p>miR-505-3p, miR-485-3p, miR-199a-3p, miR-15a-5p, miR-148b-3p, miR-487a-3p, miR-1197-5p, miR-5703, miR-362-3p, miR-4429, miR-105-3p, miR-320d, miR-370-5p, miR-496-3p, miR-378a-3p, miR-877-5p, novel_25, miR-544-3p, miR-154b-3p, miR-3074-2-3p, miR-425-5p, miR-539-5p, miR-378c, miR-29b-2-5p, miR-320e, miR-222-3p, miR-708-5p, miR-424-5p, miR-208b-5p, miR-6516-3p, miR-27a-3p, miR-2285e, miR-221-3p, miR-30b-3p, miR-4791, miR-6529a, miR-378b, miR-3120-5p, miR-2284aa, miR-544a, miR-378c, miR-424-5p, miR-30c-1-3p, miR-362-3p, novel_103, novel_115, miR-326, miR-320b, miR-499b-5p, miR-541-5p, miR-664b, miR-27a-3p, miR-378e, miR-7857-3p, novel_94, miR-181d-5p, miR-212-3p, miR-219a-2-3p, miR-8095, miR-107-5p, miR-371a-5p, miR-374a-3p, miR-7641, miR-222, miR-378h, miR-345-3p, miR-496, miR-582-3p, miR-181a-2-3p, miR-30a-3p, miR-29b-2-5p, miR-30c-2-3p, miR-2397-5p, miR-2285af, miR-107, miR-181b-5p, miR-450a-2-3p, miR-487a-3p, miR-365a-3p, miR-3154, miR-320a, miR-1814c, novel_48, miR-376c-5p, miR-6128, miR-378c, miR-374a-3p, miR-144, miR-26c, miR-370-5p, miR-135a-1-3p, miR-204-5p, miR-374b-3p, miR-486b-3p, miR-28-5p, miR-138-5p, miR-665, miR-133b-5p, miR-103, miR-544b, miR-432-5p, miR-2285g, miR-2284d, miR-181a-5p, miR-219a-1-3p, miR-30b-3p, miR-138, miR-2284ab, miR-382, miR-539-3p, miR-654-3p, miR-466f-3p, miR-7-1-3p, miR-655-5p, miR-505-3p, miR-195a-5p, miR-6516-3p, miR-107, miR-1193, miR-495-3p, miR-135a-2-3p, novel_120, miR-2428, miR-326-3p, miR-211, miR-33a-3p, miR-382-5p, miR-15a, miR-147-5p, novel_1, miR-30d-3p, miR-7859, miR-378a-3p, miR-378i, miR-361-5p, miR-148a-5p, miR-16-1-3p, miR-133a-3p, miR-142-3p, miR-345-3p, miR-195a-3p, miR-487a, miR-486-3p, miR-181b-1-3p, miR-422a, miR-345-3p, miR-219b-5p, miR-216b-3p, miR-154a-3p, miR-30c-1-3p, miR-15b-5p, miR-216b-5p, miR-377-3p, miR-2285c, miR-543-</p> |
| KRT40 | ENSOARGO( keratin |                                                                                                                                                                                                                                                                                                                                                                                                                                                                                                                                                                                                                                                                                                                                                                                                                                                                                                                                                                                                                                                                                                                                                                                                                                                                                                                                                                                                                                                                                                                                                                                                                                                                                                                                                                                                                                                                                                                                                                                                                                                                                                                                                                                                                                                                                                                                                                                                                                                                                                                                   |

let-7g-3p, miR-186-5p, miR-582-5p, miR-545-3p, miR-2331-3p, miR-660-5p, miR-296-3p, miR-499b-3p, miR-544-3p, miR-216b-5p, miR-6130, miR-29b-2-5p, miR-708-5p, miR-3074-5p, miR-4510, miR-1271, miR-3074-2-3p, miR-206-3p, miR-2300b-3p, miR-33b-3p, miR-184-3p, miR-148a-5p, miR-3600, miR-212-5p, miR-148b-3p, miR-92a-1-5p, miR-3653-3p, miR-21-3p, miR-329a-5p, miR-105-3p, miR-29b-1-5p, miR-376a-5p, miR-377-5p, miR-2432, miR-380-3p, miR-361-3p, miR-1306-3p, miR-378j, miR-96-5p, miR-2284g, miR-20a-3p, miR-7857-3p, miR-378g, miR-499a-3p, miR-489, miR-3082-5p, miR-454-5p, novel\_82, miR-2285n, miR-218-5p, miR-371a-5p, miR-301a-5p, miR-3968, miR-4726-5p, miR-335, miR-212-3p, miR-885-5p, miR-190b-5p, miR-194b-5p, miR-877-3p, miR-362-5p, miR-296-5p, miR-484, miR-301b-5p, miR-412-3p, miR-544a, miR-101c, novel\_4, miR-105-1, miR-1343-3p, miR-548w, miR-425-3p, miR-148b-5p, miR-500-5p, miR-455-3p, miR-29b-1-5p, miR-2957, miR-2285o, miR-574-3p, miR-2284b, miR-33a-5p, miR-3187-3p, miR-2310, miR-381-3p, miR-2448-3p, miR-362-5p, miR-10b-3p, miR-329b, let-7g-3p, miR-3074-1-3p, miR-7144-5p, miR-1814c, miR-3957-5p, miR-2355-5p, miR-370-3p, miR-615-5p, miR-300-3p, miR-154b-5p, miR-3957, miR-34c-3p, miR-410-5p, miR-135a-1-3p, miR-5100, miR-1306-3p, miR-410-3p, miR-28-5p, miR-1306-5p, miR-500b-5p, miR-1290, miR-300, miR-582-3p, let-7a-2-3p, miR-412, miR-1224-5p, miR-1271-5p, miR-545-5p, miR-205-5p, miR-2285af, miR-8117, miR-3071-3p, miR-450a-2-3p, miR-127-5p, miR-152-3p, miR-29b-2-5p, miR-2403, miR-148b-5p, miR-380-5p, miR-2284y, miR-200a, miR-148a-3p, miR-3970, miR-3065-5p, miR-1291, miR-9851-3p, miR-329-5p, miR-3074-5p, miR-2404, miR-6402, miR-142b, miR-206, miR-203b-5p, miR-376a-3p, miR-335-5p, miR-24-3p, miR-1843b-5p, miR-1285, miR-7b-5p, miR-194-5p, miR-380-3p, miR-133b-5p, miR-122-3p, miR-377-5p, miR-412-5p, miR-134-3p, miR-544b, miR-7-3p, miR-1271-3p, miR-9851-3p, miR-29a-5p, miR-33b-3p, miR-6536, miR-3074-1-3p, miR-129b-3p, miR-15b-5p, miR-125a, miR-141-3p, miR-134-5p, miR-592, miR-424-5p, miR-331-3p, miR-125b-5p, miR-100-3p, miR-2332, miR-222-3p, miR-2285j, miR-10b-3p, miR-1260b, miR-16-5p, miR-1306-5p, miR-433-5p, miR-539-5p, miR-128-3p, miR-582-3p, miR-330-5p, miR-134, miR-3578, novel\_133, miR-616-3p, miR-134-5p, miR-532-3p, miR-15a-5p, miR-483-3p, miR-148b-3p, miR-322-5p, miR-9-5p, miR-383-5p, miR-505-5p, miR-222, miR-152-3p, miR-200a-3p, miR-125b, miR-216a-5p, miR-125a-3p, miR-1260a, miR-143-3p, miR-146a-5p, miR-200a, miR-28b, miR-345-3p, miR-3064-5p, miR-216c-5p, novel\_94, miR-195a-5p, miR-146b-5p, miR-216a-3p, miR-148a-3p, miR-221, miR-2285ab, miR-670-3p, miR-499b-5p, miR-3064-5p, miR-2284q, miR-2285t, miR-16a, miR-2440, miR-28c, miR-4324, miR-1247-3p, miR-15a, miR-154a, miR-326-3p, miR-9-5p, miR-2285f, miR-7862, miR-1839-5p, miR-16-2-3p, miR-497-5p, miR-1260b, miR-16b, miR-484, miR-221-3p, miR-409b, miR-31-5p, miR-146b, miR-125a-5p, miR-3085-3p, miR-483-3p, miR-16b, miR-29b-1-5p, miR-146a, miR-326, miR-628-5p, miR-424-5p

|         |                   |                                                                                                                                                                                                                                                                                                                                                                                                                                                                                                                                                                                                                                                                                                                                                                                                                                                                                                                                                                                                                          |
|---------|-------------------|--------------------------------------------------------------------------------------------------------------------------------------------------------------------------------------------------------------------------------------------------------------------------------------------------------------------------------------------------------------------------------------------------------------------------------------------------------------------------------------------------------------------------------------------------------------------------------------------------------------------------------------------------------------------------------------------------------------------------------------------------------------------------------------------------------------------------------------------------------------------------------------------------------------------------------------------------------------------------------------------------------------------------|
|         |                   | miR-576-3p, miR-2440, miR-324-3p, miR-100-3p, miR-1973, miR-206, miR-656-5p, miR-4492, miR-539-5p, miR-452-5p, miR-877-3p, miR-1197-3p, miR-224-5p, miR-206-3p, miR-376b-5p, miR-148a-3p, miR-129b-3p, miR-376c-5p, miR-129b-5p, miR-378b, miR-543-3p, miR-3064-5p, miR-141-3p, miR-378g, miR-2404, miR-299b-                                                                                                                                                                                                                                                                                                                                                                                                                                                                                                                                                                                                                                                                                                            |
| RAB5A   | ENSOARGO(RAB5A, m | 3p, miR-224-5p, novel_103, miR-29b-1-5p, miR-330-3p, novel_51, miR-3085-3p, miR-200a-3p, miR-299-3p, miR-152-3p, miR-6240, miR-3064-5p, miR-1, miR-181a-2-3p, miR-664b-3p, miR-29b-1-5p, miR-2432, novel_133, miR-653, miR-4791, miR-2300b-3p, miR-1a-3p, miR-5703, miR-1388-5p, miR-299a-3p, novel_4, miR-3535, miR-148b-3p, miR-539-5p, miR-134-3p, miR-154-3p, miR-17-3p, miR-138-5p, miR-29b-2-5p, miR-2285j, miR-500b-5p, miR-362-5p, miR-17-3p, miR-1827, miR-1248, miR-504, miR-154b-3p, miR-3154, miR-362-5p, miR-216a-3p, miR-3957, miR-877-5p, miR-544-3p, miR-2284s, miR-331-5p, miR-154a-3p, miR-10b, miR-2331-3p, miR-3957-5p, miR-487a-3p, miR-504-5p, miR-17-3p, miR-2284m, miR-29b-1-5p, miR-105-5p, miR-197-5p, miR-1271-3p, miR-539-3p, miR-8485, miR-29b-1-5p, miR-376a-5p, miR-29b-2-5p, miR-487a, miR-105-2, miR-2284aa, miR-128-3p, miR-544a, miR-138, miR-1434-3p, miR-376a-5p, miR-6529a, miR-544b, miR-500-5p, miR-9788-3p, miR-6238, miR-2284z, miR-455-3p, miR-487a-3p, miR-485-3p, miR-105-1 |
| DCSTAMP | ENSOARGO(dendrocy | 1                                                                                                                                                                                                                                                                                                                                                                                                                                                                                                                                                                                                                                                                                                                                                                                                                                                                                                                                                                                                                        |
| DCN     | ENSOARGO(decorin  | miR-299a-3p, miR-299b-3p, miR-154a, novel_116, miR-1290, miR-217-5p, miR-217, novel_1, miR-3955-3p, miR-299-3p                                                                                                                                                                                                                                                                                                                                                                                                                                                                                                                                                                                                                                                                                                                                                                                                                                                                                                           |
| TOMM22  | ENSOARGO(transloc | miR-1260b, miR-1260b, miR-222-5p, miR-6402, miR-1260a                                                                                                                                                                                                                                                                                                                                                                                                                                                                                                                                                                                                                                                                                                                                                                                                                                                                                                                                                                    |
| ELAC2   | ENSOARGO(elaC rib | miR-377-5p, novel_51, miR-874-5p, miR-152-3p, miR-504-5p, miR-2355-5p, miR-377-5p, miR-432-5p, miR-148b-3p, miR-1247-5p, novel_83, miR-432, miR-148a-3p, miR-1291, miR-504, miR-378d, miR-2889, miR-671-5p                                                                                                                                                                                                                                                                                                                                                                                                                                                                                                                                                                                                                                                                                                                                                                                                               |
|         |                   | miR-214-3p, miR-376b, miR-101b-3p, miR-345-5p, miR-432, miR-708-3p, miR-21b, miR-1260b, miR-222-5p, miR-187-3p, miR-199b-3p, miR-2300a-5p, miR-9788-3p, miR-411-5p, miR-432-5p, miR-185-5p, miR-28c, miR-199c, miR-128-1-5p, novel_101, miR-423-5p, miR-154a, miR-18a-3p, miR-18b, miR-504, miR-320b, miR-7689-3p, miR-139-5p, miR-6535, miR-324-3p, miR-1260a, miR-125a-                                                                                                                                                                                                                                                                                                                                                                                                                                                                                                                                                                                                                                                |
| MKRN2   | ENSOARGO(makorin  | 3p, novel_127, miR-450a-2-3p, miR-181a-2-3p, miR-4286, miR-345-3p, miR-2411, miR-148b-5p, miR-28b, miR-142-3p, miR-184-3p, miR-18b-5p, miR-18a-3p, miR-3960, novel_83, miR-129-1-3p, miR-2411-5p, miR-487a-5p, miR-664a, miR-214, novel_42, miR-129-2-3p, miR-3184-5p, miR-1260b, miR-18a, miR-485-5p, miR-18a-5p, miR-345-5p, miR-345-5p, miR-370-3p, miR-504-5p, miR-874-3p, novel_25, miR-139-5p                                                                                                                                                                                                                                                                                                                                                                                                                                                                                                                                                                                                                      |

miR-308b-3p, miR-153-3p, miR-103a-2-5p, let-7e, miR-199a-3p, miR-2957, miR-362-3p, miR-182-5p, miR-193a, miR-4532, let-7a-5p, miR-101b-3p, let-7c-3p, miR-362-3p, miR-21b, miR-1839-5p, miR-3120-5p, miR-329-3p, miR-412-3p, miR-30b-3p, miR-153, miR-1298-3p, miR-148b-5p, miR-9788-3p, miR-216a-3p, miR-455-3p, miR-1185-3p, miR-199b-3p, miR-145b, miR-450a-5p, miR-374a-3p, novel\_82, miR-2285n, miR-2285y, miR-107-5p, miR-877-3p, miR-423-5p, miR-154a, novel\_60, miR-3956-3p, miR-212-3p, miR-190b-5p, miR-181d-5p, miR-181a-3p, miR-504, novel\_94, miR-2483-3p, miR-3082-5p, let-7d-5p, miR-1185-2-3p, miR-664b, miR-3064-5p, miR-760-3p, miR-466i-5p, miR-98-5p, let-7k, miR-216a-5p, miR-185-3p, miR-92a-1-5p, miR-421-5p, miR-376a-5p, miR-486-3p, miR-142-3p, miR-148a-5p, miR-378d, miR-1961, miR-362-3p, miR-1193, miR-7859, miR-383-5p, miR-199a-3p, miR-3600, miR-1b-3p, miR-6516-3p, miR-190a-5p, miR-454-3p, miR-4492, miR-130b-5p, miR-2285j, let-7f, miR-324-3p, miR-338-5p, miR-664a-5p, miR-665, let-7b-5p, miR-3184-5p, miR-181c-5p, let-7b, miR-665-5p, miR-543-3p, novel\_99, miR-582-5p, miR-1827, miR-433-3p, miR-582-5p, miR-301a-3p, miR-193b-3p, miR-323-5p, let-7i-5p, miR-504-5p, miR-548o-3p, miR-216b-3p, miR-370-5p, miR-296-3p, miR-182-5p, miR-196b-5p, miR-124-5p, miR-378a-5p, miR-106b-3p, miR-193a-3p, miR-296-3p, miR-190a, miR-365b-5p, miR-136-3p, miR-654-3p, miR-296-3p, miR-503-3p, miR-130b-5p, let-7f-2-3p, let-7f-2-3p, miR-30b-3p, miR-219a-1-3p, miR-2889, miR-432, miR-873a-5p, miR-1843b-5p, miR-181a-5p, miR-145a-5p, novel\_23, miR-374b-3p, miR-432-5p, miR-3535, let-7g-5p, miR-194-3p, miR-130a-3p, miR-128-1-5p, novel\_1, miR-656-5p, miR-625-3p, miR-199c, miR-576-3p, miR-142b, let-7i, miR-3959-3p, miR-24-3p, miR-301b-3p, miR-136-3p, miR-193b-3p, miR-1193, novel\_101, miR-2219a, let-7a-5p, miR-370-5p, miR-376a-2-

miR-18a-5p, miR-450a-1-3p, miR-2285c, miR-21a-3p, miR-139-5p, miR-6130, miR-376e-3p, miR-15b-5p, miR-204-3p, miR-548o-3p, miR-1277-3p, miR-2331-3p, miR-504-5p, novel\_107, miR-216b-3p, miR-6516-3p, novel\_74, miR-450b-3p, miR-424-5p, miR-874-5p, miR-4492, miR-665, miR-320e, miR-206-3p, miR-6525, miR-181c-5p, miR-122-5p, miR-3184-5p, miR-3184-3p, miR-129-2-3p, miR-4510, miR-539-5p, miR-425-5p, miR-214, miR-148a-5p, miR-2284u, miR-2366, novel\_133, miR-140-3p, miR-148b-3p, miR-222-5p, miR-23c, miR-15a-5p, miR-210-3p, miR-487a-3p, miR-328-3p, miR-532-3p, miR-1247-5p, miR-106a, miR-3960, miR-212-5p, miR-485-3p, miR-760-3p, miR-466i-5p, miR-106a, miR-299-3p, miR-196a-3p, miR-125b, miR-185-3p, miR-324-3p, miR-3601, miR-376c-3p, miR-486-3p, miR-20a, miR-504, miR-877-3p, miR-335-3p, miR-493-5p, miR-361-3p, miR-378g, miR-203-3p, miR-2319b, miR-10b, miR-452-3p, miR-2284g, miR-139-5p, miR-211-5p, miR-7977, miR-3968, miR-4726-5p, miR-1973, miR-877-3p, miR-361-3p, miR-423-5p, miR-1285-5p, miR-541-3p, miR-3059-5p, miR-2447, miR-452-5p, miR-181d-5p, miR-6527, miR-143-5p, miR-541, miR-6529a, miR-758-3p, miR-1a-3p, miR-147a, miR-2285e, miR-148b-5p, miR-216a-3p, novel\_4, miR-409b, miR-222-5p, miR-214-3p, novel\_103, miR-1306-5p, miR-326, miR-342, miR-16b, miR-106b-5p, miR-505, miR-758-3p, miR-3187-3p, miR-106a-5p, miR-382-3p, miR-424-5p, miR-2284b, miR-23a-3p, miR-20b-5p, miR-18a, miR-17-5p, miR-137-3p, miR-93-5p, miR-300-3p, miR-223-5p, miR-874-3p, miR-574-5p, miR-615-5p, miR-141-3p, miR-125a, miR-2355-5p, miR-486b-3p, miR-204-5p, miR-410-5p, miR-125b-5p, miR-331-3p, miR-1260b, miR-93, novel\_42, miR-16-5p, miR-128-3p, miR-330-5p, miR-302a-5p, miR-322-5p, miR-486-5p, miR-129-1-3p, miR-450a-1-3p, miR-299a-3p, miR-18b-5p, miR-196a-2-3p, miR-181b-5p, miR-2898, miR-152-3p, miR-200a-3p, miR-125a-3p, miR-2285af, miR-1260a, miR-2284a, miR-3956-3p, miR-2285ab, miR-150-5p, miR-3963, miR-146b-5p, miR-7977, miR-25, miR-2404, miR-378g, miR-502-5p, miR-136-3p, miR-2285f, miR-362-5p, miR-2284w, miR-326-3p, miR-484, miR-296-5p, miR-329-3p, miR-197-3p, miR-544a, miR-362-3p, miR-7862, miR-1343-3p, miR-134-3p, miR-2285g, miR-544b, miR-2285e, miR-500-5p, miR-149-5p, miR-146a, miR-326, miR-362-3p, miR-487b-5p, miR-3955-3p, miR-25-5p, miR-146b, miR-124a, miR-23a-3p, miR-3187-3p, miR-2285c, miR-23b, miR-362-5p, miR-329a, miR-2312, miR-10b-3p, miR-1827, miR-671-5p, miR-3074-1-3p, miR-221-5p, miR-3957-5p, miR-532-5p, miR-370-3p, miR-544-3p, miR-3957, miR-324-5p, miR-331-3p, miR-6740-5p, miR-4492, miR-3184-3p, miR-500b-5p, miR-10b-3p, miR-362-3p, miR-330-5p, miR-2904, miR-124-3p, miR-378d, miR-212-5p, miR-23c, miR-23b-3p, miR-543-5p, miR-221-5p, miR-125b-2-3p, miR-2478, miR-146a-5p

DIP2C ENSOARGO0 disco-in miR-505-3p, miR-2285af, miR-505-3p

GPT2 ENSOARGO0 glutamic act miR-2113

C21orf91 ENSOARGO0 chromoso miR-505-3p, miR-2285af, miR-505-3p

ACTR8 ENSOARGO0 ARP8 act miR-2113





miR-625-5p, miR-20b-5p, miR-93-5p, miR-17-5p, miR-877-3p, miR-93, miR-1197-3p, miR-539-5p, miR-3059-5p, miR-541-3p, miR-2433, miR-2332, miR-576-3p, miR-20a-5p, miR-147a, miR-148b-5p, novel\_83, miR-486-5p, miR-20b, miR-3960, miR-106a, miR-1224-5p, miR-219a-1-3p, miR-148a-5p, miR-455-5p, miR-708-3p, miR-2284r, miR-541, novel\_23, miR-1197-5p, miR-106a-5p, miR-20a, miR-106a, miR-2957, miR-106b-5p, miR-455-5p, miR-106a-5p, miR-17-5p, miR-199a-5p, miR-29b-2-5p, miR-181b-5p, miR-200c-3p, miR-543-5p, miR-200c, miR-2285af, miR-1260a, miR-217, miR-339a, miR-302a-5p, miR-582-3p, miR-222, miR-582-3p, let-7a-2-3p, miR-105-2, miR-200b-3p, miR-30a-5p, miR-218-2-3p, miR-93, miR-365a-5p, miR-103b, miR-3607-3p, miR-204-5p, miR-28-5p, miR-410-3p, miR-370-5p, miR-135a-1-3p, miR-5100, miR-2332, miR-1-5p, miR-26c, miR-144, miR-769, miR-154b-5p, miR-199a-5p, miR-324-5p, miR-215-5p, miR-370-3p, let-7g-3p, miR-671-5p, miR-23a-5p, miR-18a, miR-17-5p, miR-382, miR-660, miR-503-5p, miR-17-5p, miR-106a-5p, miR-503-5p, miR-20b, miR-133b-5p, miR-130a-3p, miR-665, miR-219a-1-3p, miR-1260b, miR-380-3p, miR-181a-5p, miR-1434-3p, miR-145a-5p, miR-371b-3p, miR-342-3p, novel\_101, miR-2285x, miR-495-3p, miR-1193, miR-147-5p, miR-22-5p, miR-20a-5p, miR-382-5p, miR-7-1-3p, miR-655-5p, miR-2285k, miR-18b, miR-2285ab, miR-21c, miR-125b-2-3p, miR-29b-1-5p, miR-146a-5p, miR-183-5p, miR-20a, miR-760-3p, miR-106a, miR-30d, miR-216a-5p, miR-200b, miR-148b-3p, miR-532-3p, miR-151-5p, miR-215-5p, miR-362-3p, miR-1246, novel\_133, miR-5703, miR-145a-3p, miR-6516-3p, miR-708-5p, miR-208b-5p, miR-222-3p, miR-655-3p, miR-29b-2-5p, miR-320e, miR-193b-3p, miR-139-5p, miR-132-5p, miR-192-5p, novel\_32, miR-660-5p, miR-532-5p, miR-370-5p, miR-154b-3p, miR-18a-5p, let-7g-3p, miR-2312, miR-193a, miR-1839-3p, miR-106a-5p, miR-382-3p, miR-652-5p, miR-1468, miR-342, miR-362-3p, miR-142-3p, miR-221-3p, miR-9788-3p, miR-105-1, miR-3120-5p, miR-2284aa, miR-143-5p, miR-484, miR-7857, miR-154a, miR-212-3p, novel\_60, miR-3059-5p, miR-181d-5p, miR-452-5p, miR-2285f, miR-335, miR-30b-5p, miR-769-5p, miR-2285y, miR-10b, miR-877-3p, miR-199b-5p, miR-129b-5p, miR-1a-2-5p, miR-152-3p, miR-30f, novel\_121, miR-2284z, miR-429-3p, miR-2285ad, miR-18b-5p, novel\_79, miR-1224-5p, miR-30c, miR-

METAP1 ENSOARGO(methionony

FBXO28 ENSOARGO(F-box pr

miR-574-3p, miR-1388-3p, miR-494-3p, miR-193a, miR-4532, miR-378d, novel\_19, miR-342, miR-320b, novel\_103, miR-1306-5p, miR-326, miR-214-3p, miR-3085-3p, miR-491-5p, miR-2300a-5p, novel\_78, miR-1343-3p, miR-330-3p, miR-455-3p, miR-216a-3p, miR-147a, miR-412-3p, miR-30b-3p, miR-296-5p, miR-378b, miR-541, miR-10b, miR-301b-5p, miR-3120-5p, miR-378c, miR-6527, miR-181d-5p, miR-2447, novel\_60, miR-541-3p, miR-3956-3p, miR-8095, miR-423-5p, miR-877-3p, miR-361-3p, miR-2285y, miR-301a-5p, miR-2285n, miR-615, miR-154-3p, miR-335, miR-541-5p, miR-7689-3p, miR-499b-5p, miR-7977, miR-3064-5p, miR-4792, miR-2319b, miR-452-3p, miR-4443, miR-378e, miR-489, miR-361-3p, miR-877-3p, novel\_94, miR-1983, miR-345-3p, miR-216c-5p, miR-487a, miR-486-3p, miR-143-3p, miR-324-3p, miR-500a-5p, miR-185-3p, miR-345-3p, miR-422a, miR-196a-3p, miR-210-5p, miR-26a-5p, miR-34b-5p, miR-30b-3p, miR-299-3p, miR-320d, miR-760-3p, miR-466i-5p, miR-485-3p, miR-18a-3p, miR-1247-5p, miR-328-3p, miR-487a-3p, miR-148b-3p, miR-217-5p, miR-378a-3p, miR-5703, miR-378i, novel\_133, miR-2300b-3p, miR-378d, miR-34a-5p, miR-493-3p, miR-4429, miR-214, miR-378c, miR-145a-3p, miR-3074-5p, miR-4510, miR-129-2-3p, miR-3184-5p, miR-338-3p, miR-181c-5p, miR-10b-5p, miR-29c-5p, miR-346, miR-324-3p, miR-132-5p, miR-29d-5p, miR-320e, miR-665, miR-500, miR-874-5p, miR-708-5p, miR-4492, miR-17-3p, miR-664a, miR-3065-3p, miR-370-5p, miR-552-3p, miR-378a-3p, novel\_32, miR-204-3p, miR-10a, miR-6130, miR-500a-3p, miR-1827, miR-339b, miR-154b-3p, miR-345-5p, miR-628-5p, miR-6240, miR-539-3p, miR-345-5p, miR-330-3p, miR-365b-5p, miR-3141, miR-455-5p, novel\_51, miR-2411-3p, miR-124-5p, miR-339-5p, miR-26b-3p, miR-340-3p, miR-149-5p, miR-194-3p, miR-432-5p, miR-432, miR-1843b-5p, miR-181a-5p, miR-223-3p, miR-1508, miR-155-5p, miR-138, miR-30b-3p, miR-1260b, miR-210-5p, miR-185-3p, novel\_51, miR-422a, miR-3085-3p, miR-3955-3p, miR-382-3p, miR-3064-5p, miR-4286, miR-378d, miR-486-3p, miR-8485, miR-2310, miR-378i, miR-378b, miR-134, miR-1290, miR-412-3p, miR-378a-3p, miR-30b-3p, miR-378c, miR-30b-3p, miR-2426, miR-184-3p, miR-187-3p, miR-2300a-5p, miR-1343-3p, miR-412, miR-378h, miR-134-5p, miR-502-5p, miR-409-3p, miR-665, miR-4726-5p, miR-203b-5p, miR-4492, miR-486b-3p, miR-134-5p, miR-378c, miR-145a-3p, novel\_101, miR-361-3p, miR-3184-5p, miR-423-5p, miR-378c, miR-6134, miR-2428, miR-361-3p, miR-129b-5p, miR-504, miR-1827, miR-1814c, miR-378f, miR-378a-3p, miR-504-5p, miR-4792, miR-3064-5p, miR-378e, novel\_32

LETM1 ENSOARGO( leucine

TP73 ENSOARGO( tumor pr

miR-432-3p, miR-432-3p, miR-363-5p, miR-193a-3p, miR-1343-5p, miR-125a-5p, novel\_51, miR-2285v, miR-503-5p, novel\_116, miR-194-3p, miR-134-3p, miR-503-5p, miR-185-5p, miR-187-3p, miR-31-5p, miR-2889, miR-744-5p, miR-497-5p, miR-4508, miR-138, miR-16b, miR-374b-3p, miR-22-3p, miR-542-3p, miR-1285, miR-873a-5p, miR-2428, miR-326-3p, miR-449a, miR-371b-3p, miR-24-3p, miR-211, miR-17-3p, miR-542-5p, miR-3957-3p, miR-193b-3p, miR-1839-3p, miR-206, novel\_1, miR-128-1-5p, miR-425-5p, miR-16a, miR-34c, miR-576-3p, miR-502-5p, miR-1247-3p, miR-15a, miR-669, novel\_69, miR-34b, miR-299b-3p, miR-146b-3p, miR-10a-5p, miR-3120-3p, miR-655-5p, miR-320b, miR-3074-5p, miR-195a-5p, miR-6395, miR-9851-3p, miR-2284e, miR-1291, miR-18a-3p, miR-216a-3p, miR-1306, miR-1271-3p, miR-200a, novel\_39, miR-3065-3p, miR-148b-5p, miR-1, miR-495-5p, miR-3064-5p, novel\_96, miR-543-5p, novel\_127, miR-127-5p, miR-17-3p, miR-450a-2-3p, miR-30c-2-3p, miR-125a-3p, novel\_121, miR-486-5p, miR-505-5p, miR-322-5p, miR-7641, miR-1224-5p, miR-299a-3p, miR-10a-5p, miR-128-3p, miR-885-3p, miR-330-5p, miR-218-2-3p, miR-1343-5p, miR-16-5p, miR-204-5p, miR-486b-3p, miR-28-5p, miR-767-5p, miR-138-5p, miR-409-3p, miR-331-3p, miR-6740-5p, miR-125b-5p, miR-2433, miR-34c-5p, miR-615-5p, miR-125a, miR-370-3p, miR-598-3p, miR-542-5p, miR-2355-5p, miR-874-3p, miR-7144-5p, miR-767, miR-488-3p, miR-758-3p, miR-4532, miR-30c-1-3p, miR-127-3p, miR-1839-3p, miR-424-5p, miR-2330-5p, miR-542-5p, miR-214-3p, miR-25-5p, miR-491-5p, miR-3085-3p, miR-16b, miR-29b-1-5p, miR-326, miR-1306-5p, miR-2459, miR-216a-3p, miR-496-5p, novel\_4, miR-1343-3p, miR-2300a-5p, miR-3120-5p, miR-544a, miR-1388-5p, miR-758-3p, miR-1a-3p, miR-10b, miR-541, miR-184, miR-2284r, miR-123-5p, miR-361-3p, miR-1296-

miR-1290, miR-23b-5p, miR-483-3p, miR-129-1-3p, miR-214-5p, miR-125a-3p, miR-376b-3p, miR-30c-2-3p, miR-17-3p, miR-543-5p, miR-4286, miR-3064-5p, miR-30a-3p, miR-148b-5p, miR-1271-3p, miR-1957a, novel\_39, miR-199a-5p, miR-17-5p, miR-93-5p, miR-671-5p, miR-23a-5p, miR-20b-5p, miR-574-5p, miR-2355-5p, miR-769, miR-34c-5p, miR-154b-5p, miR-199a-5p, miR-494-5p, miR-331-3p, miR-6740-5p, novel\_42, miR-323-3p, miR-93, miR-145-3p, novel\_23, miR-194-5p, miR-22-3p, miR-2284x, miR-7862, miR-3431, miR-185-5p, miR-20b, miR-2355-3p, miR-411-5p, miR-194-3p, miR-17-5p, miR-194a, novel\_51, miR-106a-5p, miR-3141, miR-483-3p, miR-193a-3p, miR-452-5p, miR-432-3p, miR-654-3p, miR-3141, miR-2387, miR-3065-5p, miR-412-3p, miR-9851-3p, miR-3120-3p, miR-320b, miR-34b, miR-20a-5p, miR-208a-3p, miR-4324, miR-33a-3p, miR-34c, miR-656-5p, miR-135a-2-3p, miR-495-3p, miR-17-3p, miR-193b-3p, miR-199b-5p, miR-449a, miR-2408, miR-193b-5p, miR-2300b-3p, miR-1197-5p, miR-124-3p, miR-33b-3p, miR-493-3p, miR-148a-5p, miR-34a-5p, miR-106a, miR-30d-3p, miR-208b-3p, miR-185-3p, miR-324-3p, miR-466i-5p, miR-106a, miR-34b-5p, miR-221-5p, miR-20a, miR-130a-5p, miR-487b-5p, miR-1827, miR-625-5p, miR-5480-3p, miR-30c-1-3p, miR-221-5p, miR-216b-5p, miR-193b-3p, miR-22-3p, novel\_32, miR-30e-3p, miR-664a-5p, miR-30a-3p, miR-487b-5p, miR-17-3p, miR-129-2-3p, miR-769-5p, miR-301b-5p, miR-2284r, miR-6529a, miR-484, miR-3962, miR-1388-5p, miR-409b, miR-1343-3p, miR-2300a-5p, miR-147a, miR-376b-3p, miR-2459, miR-148b-5p, miR-455-3p, miR-106b-5p, miR-3955-3p, miR-487b-5p, novel\_124, miR-3085-3p, miR-199b-5p, miR-106a-5p, miR-1388-3p, miR-124a, miR-30c-1-3p, miR-199b-5p, miR-361-3p, miR-1983, miR-877-3p, miR-376a-3p, miR-20a-3p, miR-3064-5p, miR-4792, miR-7977, miR-541-5p, miR-4443, miR-218-5p, miR-301a-5p, miR-769-5p, miR-1726-5p, miR-3059-5p, miR-194b-3p, miR-377-3p, miR-7b-5p, miR-7-5p, miR-202-5p, miR-493-3p, miR-216b-3p, miR-494-3p, miR-377-3p

SDF2L1 ENSOARGO(stromal) miR-30c-1-3p, miR-2355-5p, miR-18b-5p, miR-149-5p, miR-454-5p, miR-484, miR-18b, miR-378j, miR-18a, miR-138, miR-18a-5p, miR-4508, miR-9851-3p, miR-744-5p, miR-30c-1-3p, miR-361-3p, novel\_111, miR-4532, miR-30c-2-3p, miR-138-5p, miR-4726-5p, miR-760-3p, miR-4492

UBP1 ENSOARGO(upstream) miR-6123, miR-450b-3p, miR-206, miR-29b-1-5p, miR-29b-2-5p, novel\_17, miR-29b-1-5p, miR-206-3p, miR-29b-2-5p, miR-1, miR-665-5p, miR-129b-3p, miR-450c-3p, miR-1a-3p, miR-450a-1-3p, miR-193b-5p, miR-450a-1-3p, miR-670-3p

PPFIBP2 ENSOARGO(PTPRF in) miR-134, miR-29d-3p, miR-29b, miR-1827, miR-3064-5p, miR-3065-3p, miR-142-3p, miR-29a-3p, miR-4443, miR-199a-3p, miR-134-5p, miR-29b-3p, miR-199a-3p, miR-29a, miR-664a, miR-17-3p, miR-3085-3p, miR-17-3p, miR-134-5p, miR-452-5p, miR-29c-3p, miR-17-3p, miR-3064-5p, miR-142a-3p, miR-3065-3p

VPS13D ENSOARGO(vacuolar) miR-6238, miR-216b-5p, miR-142-3p, miR-377-3p, miR-30d-3p, miR-20a-3p, miR-452-3p, miR-10b-3p, miR-138, miR-217-5p, miR-8485, miR-142a-3p, miR-323c, miR-376a-5p, miR-30a-3p, miR-382-3p, miR-1388-3p, miR-1277-5p, miR-127-5p, miR-466i-5p, miR-138-5p, miR-3604, miR-217, miR-30a-3p, miR-500a-5p, miR-377-3p, miR-30e-3p

FAM168B ENSOARGO(family w) miR-377-3p, miR-30e-3p

ROCK2 ENSOARGO(Rho-asso)

|        |                   |                                                                                                                                                                                                                                                                                                                                                                                                                                                                                                                                                                                                                                                                                                                                                                                                                                                                                                                                                                                                                                                                                                                                                                                                                                                                                                                                                                                                                                                                                                                                                                                                                                                                                                                                                                                                                                                                                                                                                                                                                                                                                                                                               |
|--------|-------------------|-----------------------------------------------------------------------------------------------------------------------------------------------------------------------------------------------------------------------------------------------------------------------------------------------------------------------------------------------------------------------------------------------------------------------------------------------------------------------------------------------------------------------------------------------------------------------------------------------------------------------------------------------------------------------------------------------------------------------------------------------------------------------------------------------------------------------------------------------------------------------------------------------------------------------------------------------------------------------------------------------------------------------------------------------------------------------------------------------------------------------------------------------------------------------------------------------------------------------------------------------------------------------------------------------------------------------------------------------------------------------------------------------------------------------------------------------------------------------------------------------------------------------------------------------------------------------------------------------------------------------------------------------------------------------------------------------------------------------------------------------------------------------------------------------------------------------------------------------------------------------------------------------------------------------------------------------------------------------------------------------------------------------------------------------------------------------------------------------------------------------------------------------|
| ANKRD1 | ENSOARGO(ankyrin  | miR-412-3p, miR-1983, miR-301b-5p, miR-378j, miR-2483-3p, miR-24-2-5p, miR-545-5p, novel_1, miR-760-3p, miR-17-3p, miR-17-3p, miR-421-5p, miR-133a-5p, miR-410-5p, miR-320e, miR-301a-5p, miR-1285-5p, miR-494-3p, miR-17-3p, miR-6128, miR-22-3p, miR-204-3p, miR-323-5p, miR-6130, miR-32-3p, miR-221-5p, miR-2312, miR-338-3p, let-7b-5p, miR-4510, miR-17-3p, miR-6516-3p, miR-29b-2-5p, miR-369-5p, miR-199a-3p, miR-616-3p, miR-532-3p, miR-383-5p, miR-3960, miR-4429, miR-188-3p, miR-5703, miR-2300b-3p, miR-362-3p, miR-216c-5p, miR-183-5p, miR-30b-3p, miR-221-5p, miR-466i-5p, miR-320d, miR-185-3p, miR-27a-3p, let-7d-5p, miR-7977, miR-452-3p, miR-664b, miR-199b-5p, miR-361-3p, miR-219a-2-3p, miR-362-5p, miR-181d-5p, miR-2285f, miR-32-3p, miR-3059-5p, miR-2284q, miR-2285t, miR-335, miR-4726-5p, miR-769-5p, miR-500-5p, miR-9788-3p, miR-27a-3p, miR-222-5p, miR-2300a-5p, miR-3120-5p, miR-2426, miR-30b-3p, miR-484, miR-4532, miR-30c-1-3p, miR-382-3p, let-7a-5p, let-7e, miR-3955-3p, miR-362-3p, novel_103, novel_115, miR-326, miR-320b, miR-342, miR-199a-5p, miR-365a-3p, miR-769, miR-598-3p, miR-671-5p, miR-7144-5p, miR-23a-5p, miR-320a, miR-362-5p, miR-3154, miR-500b-5p, miR-409-3p, miR-3969, miR-135a-1-3p, miR-551b-3p, miR-545-5p, miR-483-3p, miR-7641, miR-200b-3p, let-7d, miR-582-3p, miR-134, miR-345-3p, miR-615-3p, miR-490-3p, miR-199a-5p, miR-1957a, miR-4286, miR-181a-2-3p, miR-29b-2-5p, miR-92a-3p, miR-181b-5p, miR-200c-3p, miR-17-3p, miR-339a, let-7c-5p, miR-30c-2-3p, miR-2397-5p, miR-2404, miR-323a-5p, miR-320b, miR-363, miR-6516-3p, miR-9851-3p, miR-450b-3p, miR-378b, miR-2387, miR-2285ab, miR-2428, miR-326-3p, novel_27, miR-24-3p, miR-3959-3p, novel_101, miR-17-3p, miR-342-3p, miR-502b, miR-199c, miR-22-5p, novel_1, miR-92a-3p, miR-128-1-5p, let-7i, miR-6402, let-7g-5p, miR-665, miR-744-5p, miR-455-5p, miR-219a-1-3p, miR-30b-3p, miR-380-3p, miR-145a-5p, miR-181a-5p, miR-1434-3p, miR-345-5p, miR-6412, miR-654-3p, miR-455-5p, let-7i-5p, miR-216b-5p, miR-552-3p, miR-216b-3p, miR-548c-3p, miR-32-5p, miR-504-5p, miR-30c-1-3p, miR-1827, miR- |
| GANAB  | ENSOARGO(glucosid |                                                                                                                                                                                                                                                                                                                                                                                                                                                                                                                                                                                                                                                                                                                                                                                                                                                                                                                                                                                                                                                                                                                                                                                                                                                                                                                                                                                                                                                                                                                                                                                                                                                                                                                                                                                                                                                                                                                                                                                                                                                                                                                                               |

miR-363-5p, miR-1b-5p, miR-345-5p, miR-432-3p, miR-30c-1-3p, miR-432-3p, miR-378d, miR-136-3p, miR-2411-3p, miR-326, miR-320b, miR-2285o, miR-3955-3p, miR-124-5p, miR-548w, miR-1343-3p, miR-31-5p, miR-455-3p, miR-9788-3p, miR-3431, miR-1298-3p, miR-2284d, miR-1434-3p, miR-1298-5p, miR-484, miR-378b, miR-101c, miR-2284aa, miR-219a-1-3p, miR-1388-5p, miR-378c, miR-1193, miR-2285x, miR-2284j, miR-9-5p, miR-1a-1-5p, miR-2447, miR-219b-3p, miR-2428, miR-326-3p, miR-24-3p, miR-28c, miR-203b-5p, miR-421-5p, miR-499a-5p, miR-329-5p, miR-139-5p, miR-320c, miR-2404, miR-378e, miR-3065-5p, miR-6516-3p, miR-9-3p, miR-378f, miR-335-3p, miR-1291, miR-181a-2-3p, miR-329a-5p, miR-2285b, miR-2411, novel\_39, miR-2432, miR-2424, miR-130a-5p, miR-28b, miR-376a-5p, miR-421-5p, miR-422a, miR-345-3p, miR-30c-2-3p, miR-21-3p, miR-221-5p, miR-1a-2-5p, miR-2284m, miR-320d, miR-6517, miR-429-3p, miR-2284z, miR-378h, miR-2411-5p, miR-302a-5p, miR-9-5p, miR-330-5p, miR-378a-3p, miR-5703, miR-140-3p, miR-345-3p, novel\_133, miR-378i, miR-4429, miR-378c, miR-378c, miR-323-3p, miR-3969, miR-6740-5p, miR-100-3p, miR-370-5p, miR-551b-3p, miR-2284k, miR-1-5p, miR-28-5p, miR-208b-5p, miR-708-5p, miR-6516-3p, miR-370-5p, miR-3068-3p, miR-30c-1-3p, miR-221-5p, miR-378a-3p, miR-2284n, miR-204-3p, miR-139-5p, miR-320a, miR-129b-3p, miR-671-5p, miR-190a-3p, miR-154b-3p, miR-345-5p, miR-345-5p, miR-10b-3p

miR-450a-1-3p, miR-200b, miR-429-3p, miR-200b-3p, miR-218-1-3p, miR-5703, miR-218-2-3p, miR-345-3p, miR-2285b, miR-199a-5p, novel\_39, miR-486-3p, miR-450b-5p, miR-376a-5p, miR-1277-5p, miR-760-3p, miR-200c-3p, miR-181b-5p, miR-345-3p, miR-30f, miR-200c, miR-6119-5p, miR-199a-5p, miR-6130, miR-504-5p, miR-543-3p, miR-345-5p, miR-345-5p, miR-10b-3p, miR-3154, miR-129b-3p, miR-200a-5p, miR-450a-1-3p, miR-21a-3p, miR-181c-5p, miR-4510, miR-3184-3p, miR-486b-3p, miR-190a-5p, miR-450b-3p, miR-665, miR-100-3p, miR-15b-3p, miR-9788-3p, miR-455-3p, miR-147a, miR-3431, miR-3535, miR-133b-5p, miR-31-5p, miR-3120-5p, miR-16-2-3p, miR-219a-1-3p, miR-30b-3p, miR-1388-5p, miR-30b-3p, miR-450c-3p, miR-181a-5p, miR-4791, miR-484, miR-345-5p, miR-432-3p, miR-432-3p, miR-33a-5p, miR-101b-3p, miR-199b-5p, miR-2411-3p, miR-190a, miR-3596, miR-2404, miR-3120-3p, miR-7689-3p, miR-2319b, novel\_68, miR-504, miR-136-5p, miR-199b-5p, miR-2428, miR-199b-5p, miR-190b-5p, novel\_101, miR-181d-5p, miR-656-5p, miR-101-3p

novel\_99, novel\_32, miR-194-3p, miR-409b, miR-665-5p, miR-379-5p, miR-7862, miR-125b-2-3p, miR-140-3p, miR-129b-3p, miR-221, miR-421, miR-532-3p, miR-221-3p, miR-6535, miR-7859, miR-7977, miR-409b, miR-222, miR-21-3p, miR-487a-5p, miR-124-5p, miR-2957, novel\_19, miR-6740-5p, miR-6402, novel\_17, miR-222-3p, miR-6134, miR-3187-3p, miR-3184-5p, miR-423-5p, miR-376b

PAK1IP1 ENSOARGO(PAK1 int)

TEX11 ENSOARGO(testis e)

PCGF5 ENSOARGO(polycomb)

ATRNL1 ENSOARGO(attracti)

|        |                    |                                                                                                                                                                                                                                                                                                                                                                                                                                                                                                                                                                                                                                                                                                                                                                                                                                                                                                                                                                                                                                                                                                                                                                                                                                                                                                                                                                                                                                                                                                                                                                                                                                                                                                                                                                                                                                                                                                                                                                                                                                                                                                                                                                                                                                                                                                                                                                                      |
|--------|--------------------|--------------------------------------------------------------------------------------------------------------------------------------------------------------------------------------------------------------------------------------------------------------------------------------------------------------------------------------------------------------------------------------------------------------------------------------------------------------------------------------------------------------------------------------------------------------------------------------------------------------------------------------------------------------------------------------------------------------------------------------------------------------------------------------------------------------------------------------------------------------------------------------------------------------------------------------------------------------------------------------------------------------------------------------------------------------------------------------------------------------------------------------------------------------------------------------------------------------------------------------------------------------------------------------------------------------------------------------------------------------------------------------------------------------------------------------------------------------------------------------------------------------------------------------------------------------------------------------------------------------------------------------------------------------------------------------------------------------------------------------------------------------------------------------------------------------------------------------------------------------------------------------------------------------------------------------------------------------------------------------------------------------------------------------------------------------------------------------------------------------------------------------------------------------------------------------------------------------------------------------------------------------------------------------------------------------------------------------------------------------------------------------|
| SEMA4G | ENSOARGO( sema dom | <p>miR-542-5p, miR-193b-3p, miR-4510, miR-3059-5p, miR-1197-3p, miR-361-3p, miR-877-3p, miR-4324, miR-2433, miR-218-5p, miR-551b-3p, miR-874-5p, miR-4492, miR-496-3p, miR-503-3p, miR-1277-3p, miR-4443, novel_32, miR-6130, miR-193b-3p, miR-1827, miR-671-5p, miR-885-3p, miR-23a-5p, miR-136-5p, miR-744-3p, miR-185-3p, miR-542-5p, miR-21-3p, miR-193a-3p, miR-542-5p, miR-466i-5p, miR-3960, miR-7134-5p, miR-296-5p, miR-744-5p, miR-3120-5p, miR-378d, miR-496, miR-7862, miR-4508, miR-885-3p<br/> miR-2459, miR-2285e, miR-455-3p, miR-9788-3p, miR-500-5p, miR-142-3p, miR-147a, miR-1298-3p, miR-181b-2-3p, miR-101c, miR-21b, miR-544a, miR-1388-5p, miR-3962, miR-1a-3p, miR-301b-5p, miR-2284r, miR-2310, miR-1b-5p, miR-8485, miR-23a-3p, miR-494-3p, miR-199b-5p, miR-3955-3p, miR-29b-1-5p, novel_115, miR-320b, miR-203-3p, miR-652-3p, miR-2483-3p, miR-3082-5p, miR-452-3p, miR-20a-3p, miR-2319b, miR-2284g, miR-9-3p, miR-335-3p, miR-668-5p, miR-96-5p, miR-129b-5p, miR-199b-5p, miR-154a, miR-362-5p, miR-2284j, miR-2285f, miR-885-5p, miR-2447, miR-3059-5p, miR-2284q, miR-2285t, miR-450a-5p, miR-3968, miR-301a-5p, miR-2285y, miR-218-5p, miR-2284h-5p, miR-23c, miR-200b, miR-23b-3p, miR-487a-3p, miR-7859, miR-485-3p, miR-30d-3p, miR-3600, miR-1b-3p, miR-548e-3p, miR-34a-5p, miR-16-1-3p, miR-4429, novel_73, miR-1197-5p, miR-5703, miR-2411, miR-2432, miR-181b-1-3p, miR-142a-3p, miR-130a-5p, miR-29b-1-5p, miR-421-5p, miR-369-3p, miR-2285w, miR-329a-5p, miR-21-3p, miR-30d, miR-221-5p, miR-34b-5p, miR-3653-3p, miR-466i-5p, miR-2284m, miR-320d, miR-345-3p, miR-500a-5p, miR-324-3p, miR-196a-3p, novel_32, novel_25, miR-204-3p, miR-193b-3p, miR-544-3p, miR-582-5p, miR-496-3p, miR-548o-3p, miR-221-5p, miR-186-5p, miR-582-5p, miR-345-5p, miR-2312, miR-30d-5p, miR-655, miR-450a-1-3p, miR-2285c, miR-21a-3p, miR-6134, miR-122-5p, miR-206-3p, miR-2330-3p, miR-3074-2-3p, miR-1271, miR-129-2-3p, miR-130b-5p, miR-874-5p, miR-208b-5p, miR-487b-5p, miR-6516-3p, miR-450b-3p, miR-29b-2-5p, miR-655-3p, miR-324-3p, miR-30a-3p, miR-30e-3p, miR-544b, novel_116, miR-412-5p, miR-2285g, miR-665, miR-31-5p, miR-188-5p, miR-2284x, miR-455-5p, miR-16-1-3p, miR-219a-1-3p, miR-21-5p, miR-2284ab, miR-450c-3p, miR-1434-3p, miR-345-5p, miR-503-3p, miR-520-3p, miR-2284l, miR-122-3p, miR-122-3p, miR-654-3p, miR-</p> |
| IGSF6  | ENSOARGO( immunogl | <p>142a-3p, miR-130a-5p, miR-29b-1-5p, miR-421-5p, miR-369-3p, miR-2285w, miR-329a-5p, miR-21-3p, miR-30d, miR-221-5p, miR-34b-5p, miR-3653-3p, miR-466i-5p, miR-2284m, miR-320d, miR-345-3p, miR-500a-5p, miR-324-3p, miR-196a-3p, novel_32, novel_25, miR-204-3p, miR-193b-3p, miR-544-3p, miR-582-5p, miR-496-3p, miR-548o-3p, miR-221-5p, miR-186-5p, miR-582-5p, miR-345-5p, miR-2312, miR-30d-5p, miR-655, miR-450a-1-3p, miR-2285c, miR-21a-3p, miR-6134, miR-122-5p, miR-206-3p, miR-2330-3p, miR-3074-2-3p, miR-1271, miR-129-2-3p, miR-130b-5p, miR-874-5p, miR-208b-5p, miR-487b-5p, miR-6516-3p, miR-450b-3p, miR-29b-2-5p, miR-655-3p, miR-324-3p, miR-30a-3p, miR-30e-3p, miR-544b, novel_116, miR-412-5p, miR-2285g, miR-665, miR-31-5p, miR-188-5p, miR-2284x, miR-455-5p, miR-16-1-3p, miR-219a-1-3p, miR-21-5p, miR-2284ab, miR-450c-3p, miR-1434-3p, miR-345-5p, miR-503-3p, miR-520-3p, miR-2284l, miR-122-3p, miR-122-3p, miR-654-3p, miR-</p>                                                                                                                                                                                                                                                                                                                                                                                                                                                                                                                                                                                                                                                                                                                                                                                                                                                                                                                                                                                                                                                                                                                                                                                                                                                                                                                                                                                                                  |



miR-199a-5p, miR-3529-3p, miR-2385-3p, miR-17-3p, miR-1260a, miR-1271-5p, miR-6516-5p, miR-582-3p, miR-7641, let-7a-2-3p, miR-496, miR-134, miR-3578, miR-345-3p, miR-29d-3p, miR-218-2-3p, miR-374a-3p, miR-323-3p, miR-93, miR-1306-5p, miR-6128, miR-374b-3p, miR-370-5p, miR-5100, miR-29b-3p, miR-1-5p, miR-409-3p, miR-3969, miR-331-3p, miR-2284n, miR-199a-5p, miR-141-3p, miR-215-5p, let-7g-3p, miR-7144-5p, novel\_48, miR-503-3p, miR-3154, miR-17-5p, miR-320a, miR-345-5p, miR-130b-5p, miR-2483-5p, miR-124-5p, miR-466f-3p, miR-452-5p, miR-106a-5p, miR-17-5p, miR-432-5p, miR-2284d, miR-2355-3p, miR-20b, miR-6238, miR-130a-3p, miR-219a-1-3p, miR-1260b, miR-29b, miR-380-3p, miR-653, miR-3071-5p, miR-24-3p, novel\_101, miR-1193, miR-17-3p, novel\_1, miR-199c, miR-502b, miR-22-5p, miR-203b-5p, miR-20a-5p, miR-133a-5p, miR-502-5p, miR-29a-3p, miR-323a-5p, miR-655-5p, miR-505-3p, miR-6516-3p, miR-376a-2-5p, miR-130a-5p, miR-216c-5p, miR-20a, miR-466i-5p, miR-2284m, miR-106a, miR-320d, miR-221-5p, miR-1277-5p, miR-340-5p, miR-505-3p, miR-3600, miR-4429, miR-215-5p, miR-140-3p, miR-5703, miR-338-3p, miR-145a-3p, miR-425-5p, miR-3074-2-3p, miR-6516-3p, miR-17-3p, miR-338-5p, miR-324-3p, miR-323-5p, miR-139-5p, miR-192-5p, miR-27a-5p, miR-6516, miR-204-3p, miR-496-3p, miR-221-5p, miR-182-5p, miR-370-5p, novel\_99, miR-582-5p, miR-494-3p, miR-106a-5p, miR-33a-5p, miR-1306-5p, miR-320b, miR-27a-3p, miR-3120-5p, miR-143-5p, miR-484, miR-154a, miR-8095, miR-541-3p, novel\_60, miR-3059-5p, miR-452-5p, miR-2284q, miR-382-3p, miR-107-5p, miR-27a-3p, miR-452-3p, miR-7977, miR-541-5p, miR-199b-5p, miR-129b-5p, miR-29a-5p, novel\_39, miR-127-5p, miR-1a-2-5p, miR-28-3p, miR-200a-3p, miR-30f, miR-3071-3p, miR-758-5p, miR-9-5p, miR-134-5p, miR-6517, miR-196a-5p, miR-3501-5p, miR-22b-5p, miR-1260b, miR-2284v, miR-28a-5p, miR-432, miR-199b-5p, miR-27b-3p, miR-2426, miR-27a-3p, miR-211-5p, miR-7977, miR-532-5p, miR-26b-3p, miR-503-3p, miR-409b, miR-455-3p, miR-199a-5p, miR-27a-3p, miR-432-5p, miR-300-3p, miR-664a-5p, miR-199b-5p, miR-22-5p, miR-204-5p, miR-124-5p, miR-450a-2-3p, miR-450a-5p, miR-3187-3p, miR-199a-5p, miR-450c-5p, miR-199b-5p, miR-211

ACBD5

ENSOARGO(acyl-CoA

NR5A2

ENSOARGO(nuclear

miR-539-3p, miR-296-3p, miR-432-3p, miR-125a-5p, miR-466f-3p, miR-378a-5p, miR-365b-5p, miR-296-3p, miR-194-3p, miR-411-5p, miR-103, miR-3535, miR-2285g, miR-134-3p, miR-3431, miR-665, miR-31-5p, miR-103a-3p, miR-497-5p, miR-2889, miR-138, miR-30b-3p, miR-16b, miR-381-5p, miR-22-3p, miR-450c-3p, miR-542-3p, miR-1843b-5p, novel\_27, miR-374c-5p, miR-326-3p, miR-2428, miR-211, miR-371b-3p, miR-1839-3p, miR-3957-3p, miR-17-3p, miR-656-5p, miR-199c, miR-379-3p, miR-16a, miR-15a, miR-4324, miR-142b, miR-28c, miR-669, miR-2404, miR-146b-3p, novel\_69, miR-3074-5p, miR-6395, miR-195a-5p, miR-378f, miR-1291, miR-107, miR-412-3p, miR-150-5p, miR-3065-5p, miR-376b-5p, miR-2285ab, miR-2387, miR-148a-3p, novel\_39, miR-28b, miR-29b-2-5p, miR-4286, miR-181a-2-3p, miR-107, miR-543-5p, miR-152-3p, miR-17-3p, miR-200c-3p, miR-3071-3p, miR-205-5p, miR-2285af, miR-200c, miR-125a-3p, miR-8117, miR-450a-1-3p, miR-214-5p, miR-129-1-3p, miR-322-5p, miR-378h, miR-1271-5p, miR-1224-5p, miR-431, miR-429-3p, miR-6517, miR-200b-3p, miR-411-3p, miR-7134-5p, miR-330-5p, miR-365a-5p, miR-378c, miR-1197-3p, miR-16-5p, miR-6128, miR-193a-5p, miR-204-5p, miR-486b-3p, miR-138-5p, miR-331-3p, miR-125b-5p, miR-324-5p, miR-769, miR-125a, miR-7144-5p, miR-376c-5p, miR-1248, miR-671-5p, miR-10b-3p, miR-329a, miR-3154, miR-376c-5p, miR-4532, miR-378d, miR-33a-5p, miR-574-3p, miR-1839-3p, miR-424-5p, miR-2330-5p, miR-381-5p, miR-1185-5p, miR-362-3p, miR-29b-1-5p, miR-323b-3p, miR-16b, miR-326, miR-431-5p, miR-9788-3p, miR-216a-3p, miR-2285e, miR-5010-3p, miR-222-5p, novel\_78, miR-199b-3p, novel\_4, miR-3120-5p, miR-362-3p, miR-378c, miR-1388-5p, miR-323b, miR-30b-3p, miR-6529a, miR-329-3p, miR-296-5p, miR-378b, miR-4791, miR-301b-5p, miR-541, miR-423-5p, miR-1285-5p, miR-2285f, miR-541-3p, miR-490-5p, miR-4726-5p, miR-

miR-34b-3p, miR-185-3p, miR-21-3p, miR-221-5p, miR-760-3p, miR-2284m, miR-216c-5p, miR-380-3p, miR-143-3p, miR-486-3p, miR-181b-1-3p, miR-664b-3p, miR-5703, miR-1197-5p, miR-1434-5p, miR-362-3p, miR-1246, miR-2300b-3p, novel\_133, miR-148a-5p, miR-133a-3p, miR-16-1-3p, miR-30d-3p, miR-548e-3p, miR-18a-3p, miR-328-3p, miR-532-3p, novel\_83, miR-199a-3p, miR-2284h-5p, miR-340-5p, miR-222-5p, miR-15a-5p, miR-7859, miR-30a-3p, miR-151-3p, miR-2285j, miR-487a-5p, miR-500, miR-424-5p, miR-6516-3p, miR-665-5p, miR-129-2-3p, miR-145a-3p, miR-181c-5p, miR-3184-5p, miR-346, novel\_44, miR-6525, miR-433-3p, miR-411, miR-500a-3p, miR-1827, miR-543-3p, miR-625-5p, miR-345-5p, miR-552-3p, miR-370-5p, miR-548o-3p, miR-30c-1-3p, miR-504-5p, miR-221-5p, miR-545-3p, miR-15b-5p, miR-877-5p, miR-204-3p, novel\_32, miR-193b-3p, miR-216b-5p, miR-377-3p, miR-544-3p, miR-16b, novel\_19, miR-362-3p, miR-326, miR-1306-5p, miR-199a-3p, miR-342, miR-103a-2-5p, miR-25-5p, miR-3085-3p, miR-1839-3p, miR-424-5p, miR-3187-3p, miR-8485, miR-30c-1-3p, miR-30b-3p, miR-541, miR-329-3p, miR-3120-5p, miR-2284aa, miR-21b, miR-101c, miR-544a, miR-362-3p, miR-181b-2-3p, miR-151a-3p, miR-105-1, miR-1343-3p, miR-9788-3p, miR-455-3p, miR-216a-3p, miR-107-5p, miR-371a-5p, miR-101-3p, miR-2284q, miR-490-5p, miR-2285t, miR-335, miR-3958-3p, miR-181d-5p, miR-2284j, miR-541-3p, miR-2447, miR-423-5p, miR-9-3p, miR-1983, miR-504, miR-147-3p, miR-7977, miR-20a-3p, miR-3064-5p, miR-24-1-5p, miR-4443, miR-2483-3p, miR-7857-3p, miR-30c-2-3p, miR-3071-3p, miR-125a-3p, miR-205-5p, miR-1260a, novel\_127, miR-543-5p, miR-127-5p, miR-181b-5p, miR-2898, miR-3064-5p, miR-30a-3p, miR-2284a, miR-490-3p, miR-2284y, novel\_39, miR-24-2-5p, miR-23b-5p, miR-330-5p, miR-29d-3p, miR-3591-5p, miR-345-3p, miR-214-5p, miR-129-1-3p, miR-2284z, miR-758-5p, miR-24-2-5p, miR-322-5p, miR-3060, miR-331-

miR-4429, miR-2284u, miR-133a-3p, miR-2300b-3p, miR-21b-5p, miR-2366, miR-5703, miR-200b, miR-30d-3p, miR-2284m, miR-320d, miR-210-5p, miR-125b, miR-345-3p, miR-412-5p, miR-216a-5p, miR-130a-5p, miR-486-3p, miR-195a-3p, miR-18a-5p, miR-2312, miR-186-5p, miR-1827, miR-27b-5p, miR-10a, miR-499b-3p, miR-192-5p, miR-377-3p, novel\_25, miR-30c-1-3p, miR-296-3p, miR-487b-5p, novel\_74, miR-30e-3p, miR-320e, miR-30a-3p, miR-6525, miR-142a-5p, miR-10b-5p, miR-539-5p, miR-1388-5p, miR-3120-5p, miR-16-2-3p, miR-101c, miR-21b, miR-10b, miR-30b-3p, miR-125b-2-3p, miR-142-5p, miR-1185-3p, miR-411b-5p, miR-9788-3p, miR-455-3p, miR-199b-3p, miR-27a-3p, miR-487b-5p, miR-1185-5p, miR-320b, miR-2957, miR-505, miR-30c-1-3p, miR-8485, miR-1839-3p, miR-9-3p, miR-369-5p, miR-489, miR-3082-5p, miR-499a-3p, miR-1185-2-3p, miR-27a-3p, miR-2319b, miR-4792, miR-2284g, miR-664b, miR-499b-5p, miR-3964, novel\_82, miR-9-3p, miR-181d-5p, miR-452-5p, miR-2285f, miR-300, miR-10a-5p, miR-200b-3p, miR-134, miR-345-3p, miR-3591-5p, miR-2427, miR-134-5p, miR-429-3p, miR-18b-5p, miR-200c-3p, miR-127-5p, miR-181b-5p, miR-450a-2-3p, miR-28-3p, miR-543-5p, miR-200c, miR-664-3p, miR-2285af, miR-3071-3p, miR-30c-2-3p, miR-450b-5p, miR-2478, miR-1271-3p, miR-192-3p, novel\_39, miR-2284y, miR-4286, miR-30a-3p, miR-876-3p, miR-381-3p, miR-18a, miR-3154, miR-320a, miR-215-5p, miR-125a, novel\_9, miR-134-5p, miR-486b-3p, miR-592, miR-2284k, miR-125b-5p, miR-323-3p, miR-28a-3p, miR-6128, miR-30b-3p, miR-2284ab, miR-27b-3p, miR-455-5p, miR-653, miR-432, novel\_23, miR-3431, miR-185-5p, miR-432-5p, miR-6238, miR-124-5p, miR-466f-3p, miR-125a-5p, miR-377-3p, miR-2411-3p, miR-455-5p, miR-432-3p, miR-432-3p, let-7j, let-7f-2-3p, miR-668-3p, miR-6516-3p, miR-18b, miR-2285ab, miR-3065-5p, miR-670-3p, miR-320c, miR-378b, miR-216b-3p, miR-10a-3p, miR-30b-3p, miR-424-5p, miR-299-3p, miR-324-3p, miR-16a, miR-365b-5p, miR-16b, miR-2285j, novel\_82, miR-15a, miR-6119-5p, miR-1306-5p, miR-365a-5p, miR-16-5p, miR-539-5p, miR-424-5p, miR-497-5p, miR-195a-5p, miR-16b, miR-219a-1-3p, miR-1306, miR-542-3p, miR-15b-5p, miR-383-5p, miR-322-5p, miR-15a-5p, miR-299b-3p, miR-3600, miR-299a-3p

KLHL2

ENSOARGO(kelch-li

MCC

ENSOARGO(mutated

miR-2330-5p, miR-574-3p, miR-1388-3p, miR-4532, miR-8485, miR-378d, novel\_19, miR-1306-5p, miR-5126, miR-326, miR-199a-3p, miR-381-5p, miR-214-3p, miR-25-5p, miR-491-5p, novel\_4, miR-409b, miR-1343-3p, miR-330-3p, miR-1185-3p, miR-496-5p, miR-30b-3p, miR-541, miR-484, miR-378b, miR-296-5p, miR-3120-5p, miR-450b-5p, miR-378c, miR-2285f, miR-1296-5p, miR-541-3p, miR-2447, miR-423-5p, miR-1285-5p, miR-361-3p, miR-1973, miR-4726-5p, miR-7689-3p, miR-499b-5p, miR-2319b, miR-1185-2-3p, miR-652-3p, miR-378e, miR-378g, miR-499a-3p, miR-378j, miR-361-3p, miR-1983, miR-96-5p, miR-486-3p, miR-377-5p, miR-345-3p, miR-185-3p, miR-422a, miR-219b-5p, miR-324-3p, miR-210-5p, novel\_17, miR-299-3p, miR-221-5p, miR-760-3p, miR-212-5p, miR-18a-3p, miR-3960, miR-199a-3p, miR-532-3p, miR-1247-5p, miR-1197-5p, miR-140-3p, miR-378a-3p, miR-188-3p, miR-2408, miR-378i, novel\_133, miR-378d, miR-133a-3p, miR-184-3p, miR-493-3p, miR-665-5p, miR-214, miR-1271, miR-129-2-3p, miR-145a-3p, miR-3074-5p, miR-378c, miR-338-3p, miR-6134, miR-3184-5p, miR-346, miR-665, miR-324-3p, miR-4492, miR-874-5p, miR-664a, miR-296-3p, novel\_107, miR-3065-3p, miR-370-5p, miR-378a-3p, miR-221-5p, miR-2331-3p, miR-204-3p, miR-22-3p, miR-499b-3p, miR-885-3p, miR-1895, miR-18a-5p, miR-345-5p, miR-133b-3p, let-7f-2-3p, let-7f-2-3p, miR-6240, miR-345-5p, miR-22841, miR-2411-3p, novel\_51, miR-330-3p, miR-3141, miR-2285v, miR-7-5p, miR-1343-5p, miR-377-5p, miR-665, miR-122-3p, novel\_116, miR-134-3p, miR-412-5p, miR-22-3p, miR-1843b-5p, miR-7b-5p, miR-873a-5p, miR-744-5p, miR-381-5p, miR-1260b, miR-30b-3p, miR-29b, miR-29c-3p, miR-1193, miR-326-3p, miR-371b-3p, miR-576-3p, miR-28c, miR-4324, miR-29a, miR-320b, miR-3074-5p, miR-299b-3p, miR-29a-3p, miR-146b-3p, miR-2404, miR-18a-3p, miR-1306, miR-3141, miR-18b, miR-2387, miR-2285ab, miR-378f, miR-382, miR-211-5p, miR-101b-3p, miR-545-5p, miR-211, miR-346, miR-500a-5p, miR-3071-5p, miR-186-5p, miR-204-5p, novel\_74

STK32C ENSOARGO( serine/threonine kinase 32C)

VEZT ENSOARGO( vezatin)

miR-338-5p, miR-320e, miR-324-3p, miR-222-3p, miR-424-5p, miR-155-5p, miR-664a, miR-450b-3p, miR-425-5p, miR-4510, miR-378c, miR-6134, miR-21a-3p, miR-18a-5p, miR-3065-3p, miR-496-3p, miR-378a-3p, miR-155-5p, miR-204-3p, novel\_32, miR-22-3p, miR-139-5p, miR-6130, miR-193b-3p, miR-185-3p, miR-125b, miR-21-3p, miR-34b-5p, miR-106a, miR-320d, miR-20a, miR-216c-5p, miR-183-5p, miR-29b-1-5p, miR-140-3p, miR-1197-5p, miR-2904, miR-2300b-3p, novel\_133, miR-378d, miR-4429, novel\_83, miR-200b, miR-15a-5p, miR-371a-5p, miR-2285n, miR-4726-5p, miR-181d-5p, miR-194b-5p, miR-2285f, miR-541-3p, novel\_60, miR-3059-5p, miR-502-3p, novel\_94, miR-7977, miR-452-3p, miR-3064-5p, miR-378e, miR-1306-5p, miR-326, miR-320b, miR-3085-3p, miR-2330-5p, miR-424-5p, miR-106a-5p, miR-30c-1-3p, miR-143-5p, miR-296-5p, miR-378b, miR-3120-5p, miR-2426, miR-378c, miR-2300a-5p, novel\_4, miR-216a-3p, miR-221-3p, miR-135a-5p, miR-26c, miR-99b-3p, miR-34c-3p, miR-410-5p, miR-29b-3p, miR-378c, miR-145-3p, miR-93, miR-18a, miR-100-5p, miR-17-5p, miR-320a, miR-503-3p, miR-381-3p, miR-485-5p, miR-671-5p, miR-10b-3p, miR-370-3p, miR-324-5p, miR-3965, miR-34c-5p, miR-30c-2-3p, miR-99a, miR-200c, miR-200c-3p, miR-181b-5p, miR-2898, miR-2403, miR-4286, miR-181a-2-3p, miR-2385-3p, miR-1271-3p, miR-3065-3p, miR-501-3p, miR-29d-3p, miR-134, miR-496, miR-99a-5p, miR-200b-3p, miR-300, miR-222, miR-214-5p, miR-378h, miR-34c, miR-16a, miR-20a-5p, miR-6402, miR-15a, miR-22-5p, novel\_1, miR-128-1-5p, miR-495-3p, miR-2285x, novel\_120, miR-326-3p, miR-449a, miR-323c, miR-18a-3p, miR-2387, miR-18b, miR-2285ab, miR-6395, miR-195a-5p, miR-135b-5p, miR-1291, miR-7-1-3p, miR-670-3p, miR-29a-3p, miR-34b, miR-2404, miR-99a-5p, miR-106a-5p, miR-17-5p, miR-503-5p, miR-466f-3p, miR-452-5p, miR-125a-5p, miR-296-3p, miR-654-3p, miR-194-5p, miR-374b-3p, miR-181a-5p, miR-

miR-191, miR-1246, miR-124-3p, miR-217-5p, miR-188-3p, miR-140-3p, miR-5703, miR-4429, miR-19b-3p, miR-664-5p, miR-30d-3p, miR-23b-3p, miR-200b, miR-148b-3p, miR-23c, miR-26a-5p, novel\_17, miR-210-5p, miR-216a-5p, miR-185-3p, miR-2284m, miR-3653-3p, miR-216c-5p, miR-503-5p, miR-487a, miR-664b-3p, miR-376a-5p, miR-129b-3p, miR-411, miR-154b-3p, miR-339b, miR-18a-5p, miR-345-5p, novel\_99, miR-2331-3p, miR-548o-3p, miR-660-5p, miR-216b-3p, miR-154a-3p, miR-370-5p, miR-21-3p, miR-544-3p, miR-499b-3p, miR-301a-3p, miR-377-3p, miR-216b-5p, novel\_32, miR-2285j, miR-30e-3p, miR-324-3p, miR-151-3p, miR-30a-3p, miR-664a-5p, miR-29b-2-5p, miR-17-3p, miR-4492, miR-454-3p, miR-130b-5p, miR-2330-3p, miR-142a-5p, miR-181c-5p, miR-758-3p, miR-544a, miR-2284aa, miR-101c, miR-2300a-5p, miR-105-1, novel\_78, miR-151a-3p, miR-330-3p, miR-27a-3p, miR-153, miR-1298-3p, miR-142-5p, miR-1185-3p, miR-130b-3p, miR-153-3p, miR-103a-2-5p, miR-124a, miR-1388-3p, miR-382-3p, miR-494-3p, miR-101b-3p, miR-23a-3p, miR-652-5p, miR-8485, miR-758-3p, miR-361-3p, miR-378j, miR-136-5p, novel\_94, miR-877-3p, miR-1983, miR-664b, miR-20a-3p, miR-2285u, miR-211-5p, miR-499a-3p, miR-2483-3p, miR-203-3p, miR-1185-2-3p, miR-27a-3p, miR-2285n, miR-101-3p, miR-2440, miR-371a-5p, miR-2285y, miR-107-5p, miR-499a-5p, miR-154-3p, miR-6527, miR-219a-5p, miR-3591-5p, miR-29d-3p, miR-105-2, miR-200b-3p, miR-128-3p, miR-2285ad, miR-429-3p, novel\_79, miR-18b-5p, miR-302a-5p, miR-2284z, novel\_121, miR-1260a, miR-125a-3p, miR-664-3p, miR-200c, miR-339a, miR-17-3p, miR-200c-3p, miR-152-3p, miR-200a-3p, miR-29b-2-5p, miR-30a-3p, miR-181a-2-3p, miR-148b-5p, miR-376b-5p, miR-376c-5p, miR-490-3p, miR-331-5p, miR-200a-5p, miR-23b, miR-18a, miR-320a, miR-10b-3p, miR-345-5p, miR-7144-5p, novel\_48, miR-1248, miR-671, miR-376b-3p, miR-143-5p, miR-2284x, novel\_99, miR-2284ab, miR-668-5p, miR-3600, miR-32-5p, miR-2459, miR-25-3p, miR-32, miR-2284k, novel\_17, miR-22-5p, miR-92a-3p, miR-92a-3p, miR-2284m, miR-2284j, miR-363-3p, miR-2284v, miR-92b-3p

DCP2

ENSOARGO(decappin)

NAAA

ENSOARGO(N-acylet)

miR-1973, miR-2285t, miR-33b, miR-2285f, novel\_60, miR-3059-5p, miR-219a-2-3p, miR-154a, miR-8095, miR-362-5p, miR-541-5p, miR-499b-5p, miR-10b, miR-452-3p, miR-27a-3p, miR-320b, miR-376b, miR-125b-2-3p, miR-2284aa, miR-2426, miR-27a-3p, miR-105-1, miR-500-5p, miR-9788-3p, miR-142-3p, miR-338-5p, miR-29b-2-5p, miR-19b-1-5p, miR-487a-5p, miR-708-5p, miR-208b-5p, miR-155-5p, miR-145a-3p, novel\_99, miR-582-5p, miR-18a-5p, let-7g-3p, miR-2312, miR-182-5p, miR-21-3p, miR-3065-3p, miR-370-5p, miR-155-5p, miR-877-5p, novel\_32, miR-204-3p, miR-192-5p, miR-185-3p, miR-216a-5p, miR-299-3p, miR-30b-3p, miR-2284m, miR-320d, miR-216c-5p, miR-2411, miR-2432, miR-5703, miR-188-3p, miR-2904, miR-215-5p, miR-2408, miR-2300b-3p, miR-4429, miR-485-3p, miR-505-3p, miR-3600, miR-548e-3p, miR-151-5p, miR-532-3p, miR-200b, miR-487a-3p, miR-33a-3p, miR-382-5p, miR-656-5p, miR-1193, novel\_27, miR-24-3p, miR-211, miR-18a-3p, miR-378b, miR-2387, miR-18b, miR-2285ab, miR-376a-2-5p, miR-505-3p, miR-7975, miR-107, miR-7-1-3p, miR-655-5p, miR-2404, miR-330-3p, miR-466f-3p, miR-126a-3p, miR-2285l, miR-130b-5p, miR-345-5p, miR-3071-5p, miR-145a-5p, miR-873a-5p, miR-2284ab, miR-2355-3p, miR-103, miR-185-5p, miR-144, miR-331-3p, miR-135a-1-3p, miR-370-5p, miR-410-5p, miR-34c-3p, miR-28-5p, miR-204-5p, miR-31-3p, miR-500b-5p, miR-18a, miR-362-5p, miR-320a, miR-3154, miR-2448-3p, miR-488-3p, miR-381-3p, miR-7144-5p, miR-10a-3p, miR-141-3p, miR-215-5p, miR-154b-5p, miR-2284n, miR-200c, miR-107, miR-200c-3p, miR-181a-2-3p, miR-2403, miR-30a-3p, miR-2385-3p, miR-29b-2-5p, miR-3065-3p, miR-380-5p, miR-28b, miR-3578, miR-134, miR-105-2, miR-200b-3p, miR-300, miR-376a-5p, miR-2411-5p, miR-301a-5p, miR-101-3p, novel\_82, miR-218-5p, miR-490-5p, miR-3968, miR-9-5p, miR-3956-3p, miR-885-5p, miR-2447, miR-877-3p, miR-381-3p, miR-544-5p, miR-493-5p, miR-211-5p, miR-7689-



miR-1306-5p, miR-16-5p, miR-6128, miR-93, miR-34c-3p, miR-6740-5p, miR-409-3p, miR-138-5p, miR-486b-3p, miR-592, miR-3068-3p, miR-2285aa, miR-376c-3p, miR-93-5p, miR-18a, miR-23b, miR-17-5p, miR-10b-3p, miR-190a-3p, miR-20b-5p, miR-1814c, miR-1, miR-3065-3p, miR-125a-3p, miR-30c-2-3p, miR-17-3p, miR-2898, miR-107, novel\_127, novel\_96, miR-18b-5p, miR-322-5p, miR-6516-5p, miR-2411-5p, miR-128-3p, miR-10a-5p, miR-496, novel\_120, miR-17-3p, miR-323c, miR-15a, miR-20a-5p, miR-133a-5p, miR-16a, miR-206, novel\_68, miR-26b-5p, miR-10a-5p, miR-18b, miR-150-5p, miR-21c, miR-18a-3p, miR-3591-3p, miR-216a-3p, miR-19a-3p, miR-107, miR-195a-5p, miR-6240, miR-382, let-7j, miR-330-3p, miR-17-5p, miR-106a-5p, miR-452-5p, miR-31-5p, miR-103a-3p, miR-26b-3p, miR-149-5p, miR-20b, miR-103, miR-19b-2-5p, miR-1434-3p, miR-21-5p, miR-138, miR-16b, miR-497-5p, miR-744-5p, miR-10b-5p, miR-206-3p, miR-3184-5p, miR-2285j, miR-324-3p, miR-19b-1-5p, novel\_74, miR-17-3p, miR-487b-5p, miR-129-5p, miR-4492, miR-424-5p, miR-504-5p, miR-30c-1-3p, miR-496-3p, miR-3065-3p, miR-216b-3p, miR-21-3p, miR-552-3p, miR-376e-3p, miR-10a, miR-2284s, miR-6516, novel\_25, miR-15b-5p, miR-27b-5p, miR-18a-5p, miR-186-5p, miR-216c-5p, miR-2285w, miR-20a, miR-29b-1-5p, miR-376a-5p, miR-376c-3p, miR-2411, miR-486-3p, miR-196a-3p, miR-26a-5p, miR-216a-5p, miR-185-3p, miR-106a, miR-466i-5p, miR-18a-3p, miR-106a, miR-23b-3p, miR-7859, miR-15a-5p, miR-340-5p, miR-222-5p, miR-23c, miR-2284h-5p, miR-199a-3p, miR-188-3p, miR-5703, miR-19b-3p, miR-3059-5p, miR-361-3p, miR-423-5p, miR-2285n, novel\_82, miR-490-5p, miR-2285t, miR-452-3p, miR-361-3p, miR-129b-5p, miR-136-5p, miR-504, miR-1388-3p, miR-106a-5p, miR-424-5p, miR-23a-3p, miR-30c-1-3p, miR-3187-3p, miR-2310, miR-199a-3p, miR-5126, miR-29b-1-5p, miR-106b-5p, miR-16b, miR-191-5p, miR-330, miR-181a-2-3p, miR-487a, miR-539-3p, miR-30f, novel\_51, miR-196a-3p, miR-320b, miR-200a-3p, miR-543-5p, miR-320d, miR-466i-5p, miR-485-3p, miR-26b-3p, miR-548w, novel\_83, miR-126a-5p, miR-487a-3p, miR-140-3p, miR-3071-5p, miR-2408, miR-7862, miR-138, miR-4429, miR-3059-5p, miR-324-3p, miR-33a-3p, novel\_63, miR-154-3p, miR-138-5p, miR-154a-3p, miR-141-3p, miR-487a-3p, miR-320c, miR-3082-5p, miR-320a, miR-154b-3p

miR-93, miR-769-5p, miR-181c-5p, miR-664a, novel\_63, miR-2285j, miR-29b-3p, miR-655-3p, miR-144, miR-151-3p, miR-769, miR-544-3p, miR-133c, miR-3065-3p, miR-339b, miR-20b-5p, miR-21a-3p, miR-17-5p, miR-655, miR-93-5p, miR-3956-5p, miR-29a-5p, miR-3065-3p, miR-146a-5p, miR-183-5p, miR-216c-5p, miR-20a, miR-2385-3p, miR-181b-5p, miR-106a, miR-2285p, miR-8117, miR-210-5p, miR-339a, miR-217, miR-216a-5p, miR-222-5p, miR-9-5p, miR-106a, novel\_79, miR-2300b-3p, miR-3578, miR-1290, miR-217-5p, miR-188-3p, miR-29d-3p, miR-361-3p, miR-1285-5p, miR-9-5p, miR-29c-3p, miR-181d-5p, miR-2285x, miR-6527, miR-29a, miR-20a-5p, miR-769-5p, miR-29a-3p, miR-2404, miR-652-3p, miR-144-3p, miR-677, miR-20a-3p, miR-216b-3p, miR-146b-5p, miR-8485, miR-106a-5p, miR-382-3p, miR-146b, miR-146a, miR-106b-5p, novel\_51, miR-106a-5p, miR-17-5p, miR-185-5p, miR-20b, miR-544b, miR-6238, miR-455-3p, miR-411-5p, miR-133b-5p, miR-151a-3p, miR-181b-2-3p, miR-339-5p, miR-544a, miR-29b, miR-181a-5p, miR-542-3p, miR-411, miR-450a-1-3p, miR-424-3p, miR-485-5p, miR-1827, miR-1248, let-7g-3p, miR-10b-3p, miR-345-5p, miR-345-5p, miR-2355-5p, miR-1271, miR-545-3p, miR-22-3p, miR-324-5p, miR-204-3p, miR-155-5p, miR-132-5p, miR-551b-3p, miR-486b-3p, miR-450b-3p, miR-664a, miR-193a-5p, miR-145-3p, miR-10b-3p, miR-346, miR-140-3p, miR-217-5p, miR-330-5p, miR-155-5p, miR-133a-3p, miR-105-2, miR-3600, miR-6517, miR-450a-1-3p, novel\_83, miR-486-5p, miR-340-5p, miR-324-3p, miR-217, miR-3064-5p, miR-486-3p, miR-2285b, miR-130a-5p, miR-1306, miR-3065-5p, miR-361-3p, novel\_94, miR-1291, miR-3064-5p, miR-10b, miR-2404, miR-378g, miR-107-5p, miR-33a-3p, novel\_60, miR-2447, miR-3956-3p, miR-136-3p, miR-326-3p, miR-361-3p, miR-22-3p, miR-450c-3p, miR-2284r, miR-4508, miR-3120-5p, miR-1388-5p, miR-125b-1-3p, miR-101a-5p, miR-105-1, miR-1343-3p, miR-330-3p, miR-2300a-5p, miR-134-3p, miR-330-3p, miR-105-5p, novel\_51, miR-326, miR-1306-5p, miR-103a-2-5p, miR-3085-3p, miR-363-5p, miR-1388-3p, miR-6240, miR-345-5p

miR-106a, miR-30b-3p, novel\_17, miR-324-3p, miR-122-3p, miR-486-3p, miR-2432, miR-216c-5p, miR-487a, miR-20a, miR-19b-3p, miR-664-5p, miR-2300b-3p, miR-188-3p, miR-1197-5p, miR-1193, miR-487a-3p, miR-106a, miR-485-3p, miR-212-5p, novel\_74, miR-17-3p, miR-4492, miR-874-5p, miR-130b-5p, miR-338-5p, miR-664a-5p, miR-320e, miR-145a-3p, miR-345-5p, miR-154b-3p, miR-186-5p, miR-1827, miR-129b-3p, miR-377-3p, miR-193b-3p, miR-216b-5p, miR-204-3p, miR-877-5p, miR-660-5p, miR-496-3p, miR-154a-3p, miR-3065-3p, miR-552-3p, miR-3085-3p, miR-1185-5p, miR-2285o, miR-342, miR-1306-5p, miR-106b-5p, miR-1388-3p, miR-106a-5p, miR-1388-5p, miR-2426, miR-3120-5p, miR-484, miR-541, miR-500-5p, miR-2459, miR-421, miR-1343-3p, miR-4726-5p, miR-3968, miR-154-3p, miR-2285n, miR-2440, miR-362-5p, miR-361-3p, miR-7705, miR-2447, miR-3059-5p, miR-541-3p, miR-378g, miR-203-3p, miR-3064-5p, miR-211-5p, miR-17-3p, miR-107, miR-200a-3p, miR-1260a, miR-2397-5p, miR-2478, miR-3065-3p, novel\_39, miR-3064-5p, miR-496, miR-134, miR-3578, miR-134-5p, miR-486b-3p, miR-134-5p, miR-204-5p, miR-5100, miR-331-3p, miR-93, miR-1260b, miR-3607-3p, miR-345-5p, miR-20b-5p, miR-3074-1-3p, miR-485-5p, miR-301, miR-200a-5p, miR-93-5p, miR-362-5p, miR-17-5p, miR-154b-5p, miR-487a-3p, miR-574-5p, miR-503-3p, miR-2285aa, miR-2355-5p, miR-141-3p, miR-2285l, miR-660, miR-193a-3p, miR-377-3p, miR-17-5p, miR-106a-5p, miR-539-3p, miR-345-5p, miR-130b-5p, miR-668-3p, miR-628-5p, miR-1260b, miR-188-5p, miR-873a-5p, miR-1285, miR-185-5p, miR-134-3p, miR-3431, miR-20b, miR-103, miR-2355-3p, miR-103a-3p, miR-128-1-5p, miR-656-5p, miR-147-5p, miR-502b, miR-502-5p, miR-20a-5p, miR-211, miR-2285m, miR-342-3p, miR-193b-3p, miR-17-3p, miR-495-3p, miR-450b-3p, miR-19a-3p, miR-107, miR-7975, miR-2387, miR-1306, miR-146b-3p, miR-660, miR-2285f, miR-185-5p, miR-29b-1-5p, miR-2285r, miR-2285g, miR-2285e, novel\_25, miR-1957a, miR-2285c, miR-2285ab, miR-29b-1-5p, miR-2312, miR-485-5p, miR-2285t, miR-677, miR-203-3p, miR-6535, miR-181b-3p, miR-3082-5p, novel\_69, miR-670-3p, miR-2483-3p, miR-20a-3p, miR-2319b, miR-877-3p, miR-135b-5p, miR-1291, miR-21c, miR-381-3p, miR-129b-5p, miR-154a, miR-362-5p, miR-190b-5p, miR-32-3p, novel\_60, miR-3956-3p, miR-3964, miR-371a-5p, miR-33a-3p, miR-3613, miR-500-5p, miR-181b-2-3p, miR-105-1, miR-330-3p, miR-2284aa, miR-455-5p, miR-21-5p, miR-1388-5p, miR-380-3p, miR-101a-5p, miR-223-3p, miR-8485, miR-503-3p, miR-101-5p, let-7c-3p, miR-130b-5p, miR-6240, miR-190a, miR-105-5p, miR-330-3p, miR-182-5p, miR-455-5p, miR-133c, miR-132-5p, miR-331-5p, miR-3965, miR-182-5p, miR-2331-3p, miR-32-3p, miR-548o-3p, miR-625-5p, miR-362-5p, miR-487b-5p, let-7f-1-3p, miR-3613-5p, miR-500b-5p, miR-98-3p, miR-425-5p, miR-190a-5p, miR-130b-5p, miR-30a-3p, miR-132-5p, miR-135a-5p, let-7b-3p, miR-30e-3p, miR-494-5p, miR-2284z, miR-545-5p, miR-383-5p, miR-30d-3p, miR-105-2, let-7a-3p, miR-98-3p, miR-188-3p, miR-1246, miR-1271-3p, miR-450b-5p, miR-130a-5p, miR-181b-1-3p, miR-30a-3p, novel\_17

SLC25A20 ENSOARGO(mitochon

TSEN2 ENSOARGO(TSEN2 tr

MEF2C ENSOARGO(myocyte

miR-758-5p, miR-2411-5p, miR-214-5p, miR-222, miR-429-3p, miR-6517, miR-582-3p, miR-200b-3p, miR-128-3p, miR-345-3p, miR-330-5p, miR-199a-5p, miR-3956-5p, miR-1271-3p, miR-17-3p, miR-200c-3p, miR-543-5p, novel\_127, miR-205-5p, miR-2285af, miR-200c, miR-3071-3p, miR-769, miR-324-5p, miR-199a-5p, miR-874-3p, miR-370-3p, miR-1271, miR-1248, miR-488-3p, miR-23b, miR-181a-2-3p, miR-2284v, miR-193a-5p, miR-410-5p, miR-2284k, miR-135a-5p, miR-3431, miR-134-3p, miR-6238, miR-2355-3p, miR-31-5p, miR-2284ab, miR-455-5p, miR-19b-2-5p, miR-7b-5p, miR-542-3p, miR-145a-5p, miR-2284l, miR-296-3p, miR-193a-3p, miR-224-5p, miR-7-5p, miR-296-3p, miR-2411-3p, miR-455-5p, miR-411b-3p, miR-3074-5p, miR-1291, miR-9851-3p, miR-135b-5p, miR-18a-3p, miR-216a-3p, miR-371b-3p, miR-326-3p, miR-199b-5p, miR-219b-3p, miR-1839-3p, miR-193b-3p, miR-17-3p, miR-203b-5p, miR-6123, miR-576-3p, miR-23b-3p, miR-7859, miR-23c, miR-200b, miR-616-3p, miR-18a-3p, miR-548e-3p, miR-212-5p, miR-133a-3p, miR-148a-5p, miR-378d, novel\_133, miR-1197-5p, miR-125b-2-3p, miR-2411, miR-369-3p, miR-466i-5p, miR-30b-3p, miR-21-3p, miR-324-3p, miR-500a-5p, miR-345-3p, miR-582-5p, miR-193b-3p, miR-2331-3p, miR-216b-3p, miR-296-3p, miR-582-5p, miR-769-5p, miR-224-5p, miR-3074-5p, miR-3074-2-3p, miR-17-3p, miR-222-3p, miR-324-3p, miR-19b-1-5p, miR-320e, miR-665, miR-216a-3p, miR-148b-5p, miR-221-3p, miR-548w, miR-145b, miR-1388-5p, miR-450b-5p, miR-101a-5p, miR-2426, miR-2284r, miR-1298-5p, miR-143-5p, miR-8485, miR-1839-3p, miR-23a-3p, miR-3955-3p, miR-199b-5p, miR-326, miR-2957, miR-378g, miR-7689-3p, miR-136-5p, novel\_94, miR-877-3p, miR-9-3p, miR-199b-5p, miR-221, miR-129b-5p, novel\_60, miR-3059-5p, miR-3956-3p, miR-628-3p, miR-490-5p, novel\_82, miR-382-3p, miR-769-5p

WRAP73 ENSOARGO(WD repea miR-377-5p, miR-4532, miR-326-3p, miR-1247-5p, miR-2300a-5p, miR-377-5p, miR-412, miR-23a-5p, miR-326, miR-330-5p, miR-92a-1-5p, miR-412-3p

GREB1 ENSOARGO(growth r miR-151-3p, miR-6740-5p, miR-138-5p, miR-204-5p, miR-424-5p, miR-129-2-3p, miR-2330-3p, miR-103b, miR-16-5p, miR-193a-5p, novel\_44, miR-142a-5p, miR-6134, miR-376c-5p, miR-345-5p, miR-345-5p, miR-376c-5p, miR-615-5p, miR-216b-3p, miR-139-5p, miR-216b-5p, miR-377-3p, miR-376e-3p, miR-376c-3p, miR-15b-5p, miR-2285p, miR-125a-3p, miR-2285af, miR-185-3p, miR-191-3p, miR-376c-3p, miR-376a-5p, miR-330-5p, miR-1197-5p, miR-582-3p, miR-378d, miR-412, miR-15a-5p, miR-322-5p, miR-302a-5p, miR-129-1-3p, miR-15a, miR-218-5p, miR-16a, miR-3956-3p, novel\_60, miR-342-3p, novel\_111, miR-211, miR-326-3p, novel\_27, miR-1285-5p, miR-376b-5p, miR-378j, miR-1291, miR-2319a, miR-335-3p, miR-216b-3p, miR-139-5p, miR-211-5p, miR-7689-3p, novel\_69, miR-7857-3p, miR-378g, miR-454-5p, miR-6535, miR-377-3p, miR-326, miR-296-3p, miR-342, miR-16b, miR-378a-5p, miR-424-5p, miR-2330-5p, miR-432-3p, miR-345-5p, miR-296-3p, miR-4791, miR-125b-2-3p, novel\_23, miR-412-3p, miR-7857, miR-197-3p, miR-16b, miR-138, miR-2889, miR-188-5p, miR-497-5p, miR-151a-3p, miR-142-5p, miR-134-3p, miR-3535, miR-149-5p

PROC ENSOARGO(protein

|       |                   |                                                                                                                                                                                                                                                                                                                                                                                                                                                                                                                                                                                                                                                                                                                                                                                                                                                                                                                                                                                                                                                                                                                                                                                                                                                                                                                                                                                                                                                                                                                                      |
|-------|-------------------|--------------------------------------------------------------------------------------------------------------------------------------------------------------------------------------------------------------------------------------------------------------------------------------------------------------------------------------------------------------------------------------------------------------------------------------------------------------------------------------------------------------------------------------------------------------------------------------------------------------------------------------------------------------------------------------------------------------------------------------------------------------------------------------------------------------------------------------------------------------------------------------------------------------------------------------------------------------------------------------------------------------------------------------------------------------------------------------------------------------------------------------------------------------------------------------------------------------------------------------------------------------------------------------------------------------------------------------------------------------------------------------------------------------------------------------------------------------------------------------------------------------------------------------|
| IL2RG | ENSOARGO(interleu | <p>miR-107, miR-504, miR-378f, miR-195a-5p, miR-2387, miR-34b, novel_69, miR-146b-3p, miR-378e, miR-4792, miR-26b-5p, novel_1, miR-421-5p, miR-490-5p, miR-2440, miR-15a, miR-16a, miR-34c, miR-362-5p, miR-2428, miR-449a, novel_27, miR-381-5p, miR-1260b, miR-378c, miR-16b, miR-497-5p, miR-2113, miR-653, miR-378b, miR-185-5p, miR-147a, miR-103, miR-500-5p, miR-103a-3p, miR-381-5p, miR-16b, miR-197-5p, miR-432-3p, miR-432-3p, miR-378d, miR-494-3p, miR-424-5p, miR-130b-5p, miR-485-5p, miR-1827, miR-362-5p, miR-598-3p, miR-200a-5p, miR-6130, miR-34c-5p, miR-15b-5p, miR-154b-5p, miR-378a-3p, miR-504-5p, miR-545-3p, miR-598-3p, miR-130b-5p, miR-486b-3p, miR-4492, miR-424-5p, miR-1260b, miR-378c, miR-122-5p, miR-4510, miR-378c, miR-665-5p, miR-16-5p, miR-34a-5p, miR-218-1-3p, miR-1246, novel_133, miR-378i, miR-5703, miR-378a-3p, miR-378h, miR-15a-5p, miR-322-5p, miR-532-3p, miR-3600, miR-2898, miR-2484, miR-107, miR-34b-5p, miR-26a-5p, miR-1260a, miR-422a, miR-185-3p, miR-148b-5p, miR-143-3p, miR-376b-5p, novel_39, miR-376c-5p, miR-486-3p, miR-483-3p, miR-6238, miR-2300a-5p, miR-187-3p, miR-1224-5p, miR-496, miR-143-5p, miR-215-5p, miR-376a-5p, miR-3578, miR-873a-5p, miR-191, miR-664b-3p, miR-200a, miR-1388-3p, miR-29b-2-5p, miR-483-3p, miR-103a-2-5p, novel_17, miR-496-3p, miR-503-3p, miR-548o-3p, miR-216b-3p, miR-215-5p, miR-2355-5p, miR-21-3p, miR-877-3p, miR-3591-3p, miR-323-3p, miR-219b-3p, miR-452-5p, miR-3074-2-3p, miR-191-5p, miR-107-5p, miR-29b-2-5p</p> |
| BRIP1 | ENSOARGO(BRCA1 in |                                                                                                                                                                                                                                                                                                                                                                                                                                                                                                                                                                                                                                                                                                                                                                                                                                                                                                                                                                                                                                                                                                                                                                                                                                                                                                                                                                                                                                                                                                                                      |

miR-542-3p, miR-1843b-5p, miR-432, miR-27b-3p, miR-2284x, miR-31-5p, miR-3955-5p, miR-194-3p, miR-149-5p, novel\_51, miR-296-3p, miR-146a, miR-193a-3p, miR-378a-5p, miR-6240, miR-493-5p, miR-2284l, miR-432-3p, miR-432-3p, miR-2285r, miR-150-5p, miR-1306, miR-378f, miR-146b-5p, miR-3074-5p, miR-320c, miR-299b-3p, miR-28c, miR-576-3p, miR-1247-3p, miR-6123, miR-29a, miR-206, miR-29c-3p, miR-1839-3p, miR-193b-3p, miR-335-5p, miR-23b-5p, miR-330-5p, miR-1343-5p, miR-885-3p, miR-299a-3p, novel\_121, miR-134-5p, miR-505-5p, miR-125a-3p, novel\_127, miR-127-5p, novel\_39, miR-23b, miR-301, miR-329a, miR-876-3p, miR-125a, miR-2285aa, miR-2355-5p, miR-874-3p, miR-6740-5p, miR-100-3p, miR-125b-5p, miR-134-5p, miR-1197-3p, miR-1a-3p, miR-323b, miR-541, miR-329-3p, miR-101c, miR-362-3p, miR-548w, miR-330-3p, miR-421, miR-455-3p, miR-148b-5p, miR-147a, miR-539-5p, miR-505, miR-323b-3p, miR-199a-3p, miR-146b, miR-23a-3p, miR-8485, miR-378d, miR-493-5p, miR-504, miR-96-5p, miR-4792, miR-652-3p, miR-2483-3p, miR-3596, miR-2440, novel\_82, miR-2284j, miR-3956-3p, miR-2447, miR-423-5p, miR-361-3p, miR-378a-3p, miR-1434-5p, miR-193b-5p, miR-2366, miR-378i, miR-148a-5p, miR-18a-3p, miR-2284h-5p, miR-23c, miR-210-3p, miR-23b-3p, miR-92a-1-5p, miR-422a, miR-219b-5p, miR-324-3p, miR-210-5p, miR-2285p, miR-486-3p, miR-664b-3p, miR-655, miR-129b-3p, miR-2285c, miR-299, miR-1827, miR-543-3p, miR-885-3p, miR-625-5p, miR-296-3p, miR-216b-3p, miR-30c-1-3p, miR-504-5p, miR-151b, miR-216b-5p, miR-151-3p, miR-2285j, miR-4492, miR-874-5p, novel\_74, miR-3074-5p, miR-181c-5p, miR-3184-5p, miR-346, miR-6525, miR-769-5p, miR-3071-5p, miR-181a-5p, miR-7862, miR-455-5p, miR-219a-1-3p, miR-29b, miR-30b-3p, miR-26b-3p, miR-665, miR-2355-3p, miR-2285g, miR-432-5p, miR-455-5p, miR-330-3p, miR-1343-5p, miR-125a-5p, miR-124-5p, miR-382, miR-296-3p, miR-18a-

miR-483-3p, miR-2411-5p, miR-322-5p, miR-429-3p, miR-105-2, miR-200b-3p, miR-218-2-3p, miR-3065-3p, miR-200a-3p, novel\_127, miR-181b-5p, miR-200c-3p, miR-3071-3p, miR-200c, miR-205-5p, miR-769, miR-141-3p, miR-615-5p, miR-874-3p, miR-485-5p, miR-20b-5p, miR-329a, miR-17-5p, miR-93-5p, miR-374a-3p, miR-93, miR-16-5p, miR-374b-3p, miR-486b-3p, miR-138-5p, miR-331-3p, miR-370-5p, miR-2332, miR-20b, miR-149-5p, miR-185-5p, miR-3431, miR-2285g, miR-130a-3p, miR-744-5p, miR-455-5p, miR-497-5p, miR-16b, miR-138, miR-22-3p, miR-197-3p, miR-181a-5p, miR-22841, miR-654-3p, miR-101-5p, miR-493-5p, miR-483-3p, miR-106a-5p, miR-17-5p, miR-455-5p, miR-105-5p, miR-377-3p, novel\_69, miR-329-5p, novel\_68, miR-505-3p, miR-195a-5p, miR-6516-3p, miR-1291, miR-18a-3p, miR-1306, miR-2285ab, miR-301b-3p, miR-1193, miR-335-5p, miR-136-3p, miR-342-3p, miR-6119-3p, novel\_87, miR-16a, miR-20a-5p, miR-142b, miR-15a, miR-532-3p, miR-200b, miR-15a-5p, miR-212-5p, miR-505-3p, miR-18a-3p, miR-3960, miR-378d, miR-664-5p, miR-188-3p, miR-140-3p, miR-362-3p, miR-2408, miR-2411, miR-486-3p, miR-20a, miR-195a-3p, miR-329a-5p, miR-221-5p, miR-1277-5p, miR-760-3p, miR-324-3p, miR-877-5p, miR-15b-5p, miR-22-3p, novel\_32, miR-6130, miR-132-5p, miR-301a-3p, miR-377-3p, miR-370-5p, miR-3065-3p, miR-221-5p, miR-2312, miR-411, miR-2285c, miR-181c-5p, miR-346, miR-769-5p, miR-214, miR-4510, miR-424-5p, miR-454-3p, miR-664a, miR-665, miR-320e, miR-2459, miR-2285e, miR-1298-3p, novel\_4, miR-105-1, novel\_78, miR-2426, miR-362-3p, miR-329-3p, miR-8485, let-7c-3p, miR-382-3p, miR-424-5p, miR-214-3p, miR-2285o, miR-25-5p, miR-130b-3p, miR-106b-5p, miR-16b, miR-362-3p, miR-1306-5p, miR-342, miR-203-3p, miR-3596, miR-126b-5p, miR-493-5p, miR-154a, miR-181d-5p, miR-2285f, miR-374a-3p, miR-335, miR-3968, miR-769-5p

miR-466i-5p, miR-34b-5p, miR-2484, miR-2285p, miR-216a-5p, miR-92a-1-5p, miR-181b-1-3p, miR-2432, miR-2285w, miR-33b-3p, miR-142-3p, miR-34a-5p, miR-191, miR-193b-5p, miR-2904, miR-188-3p, miR-217-5p, miR-5703, miR-95-3p, miR-340-5p, miR-15a-5p, novel\_83, miR-199a-3p, miR-151-5p, miR-2284h-5p, miR-3600, miR-17-3p, miR-708-5p, miR-208b-5p, miR-424-5p, miR-669a-3p, miR-324-3p, miR-320e, miR-338-5p, miR-3604, miR-6525, miR-338-3p, miR-539-5p, miR-3074-5p, miR-425-5p, miR-2330-3p, miR-345-5p, miR-1895, miR-543-3p, novel\_99, miR-1827, miR-129b-3p, miR-433-3p, miR-544-3p, miR-499b-3p, miR-656-3p, miR-323-5p, miR-204-3p, miR-15b-5p, miR-151b, miR-2331-3p, miR-504-5p, miR-3065-3p, novel\_124, miR-153-3p, miR-103a-2-5p, miR-199a-3p, novel\_115, miR-505, miR-323b-3p, miR-16b, miR-1388-3p, miR-424-5p, miR-494-3p, miR-101a-5p, miR-544a, miR-3120-5p, miR-296-5p, miR-323b, miR-153, miR-539-5p, miR-1298-3p, miR-9788-3p, miR-455-3p, miR-1185-3p, miR-199b-3p, novel\_78, miR-145b, miR-181b-2-3p, miR-628-3p, miR-499a-5p, miR-2284q, miR-218-5p, miR-107-5p, miR-877-3p, miR-154a, miR-2447, miR-3059-5p, miR-212-3p, miR-885-5p, miR-181d-5p, miR-194b-5p, miR-9-5p, miR-3963, miR-136-5p, miR-668-5p, miR-504, miR-140-5p, miR-499a-3p, miR-1185-2-3p, miR-20a-3p, miR-28-3p, miR-17-3p, miR-181b-5p, miR-127-5p, miR-543-5p, miR-217, miR-3065-3p, novel\_39, miR-1271-3p, miR-4286, miR-1290, miR-134, miR-29d-3p, miR-322-5p, miR-9-5p, miR-758-5p, miR-134-5p, miR-545-5p, novel\_121, miR-6517, miR-1224-5p, miR-191-5p, miR-134-5p, miR-28-5p, miR-29b-3p, miR-135a-1-3p, miR-26c, miR-135a-5p, miR-365a-5p, miR-28a-3p, miR-6128, miR-16-5p, miR-345-5p, let-7g-3p, miR-7144-5p, miR-34c-5p, miR-324-5p, miR-133c, miR-223-5p, miR-370-3p, miR-3956, miR-1271, miR-124-5p, miR-7-5p, miR-365b-5p, miR-3141, miR-194a, miR-345-5p, let-7g-3p, miR-532-3p, miR-26a-2-3p, miR-125b-2-3p, miR-2284l, miR-2284d, miR-2284ab, miR-2355-5p

MTL5 ENSOARGO(metalloproteinase) 296-5p, miR-323b, miR-153, miR-539-5p, miR-1298-3p, miR-9788-3p, miR-455-3p, miR-1185-3p, miR-199b-3p, novel\_78, miR-145b, miR-181b-2-3p, miR-628-3p, miR-499a-5p, miR-2284q, miR-218-5p, miR-107-5p, miR-877-3p, miR-154a, miR-2447, miR-3059-5p, miR-212-3p, miR-885-5p, miR-181d-5p, miR-194b-5p, miR-9-5p, miR-3963, miR-136-5p, miR-668-5p, miR-504, miR-140-5p, miR-499a-3p, miR-1185-2-3p, miR-20a-3p, miR-28-3p, miR-17-3p, miR-181b-5p, miR-127-5p, miR-543-5p, miR-217, miR-3065-3p, novel\_39, miR-1271-3p, miR-4286, miR-1290, miR-134, miR-29d-3p, miR-322-5p, miR-9-5p, miR-758-5p, miR-134-5p, miR-545-5p, novel\_121, miR-6517, miR-1224-5p, miR-191-5p, miR-134-5p, miR-28-5p, miR-29b-3p, miR-135a-1-3p, miR-26c, miR-135a-5p, miR-365a-5p, miR-28a-3p, miR-6128, miR-16-5p, miR-345-5p, let-7g-3p, miR-7144-5p, miR-34c-5p, miR-324-5p, miR-133c, miR-223-5p, miR-370-3p, miR-3956, miR-1271, miR-124-5p, miR-7-5p, miR-365b-5p, miR-3141, miR-194a, miR-345-5p, let-7g-3p, miR-532-3p, miR-26a-2-3p, miR-125b-2-3p, miR-2284l, miR-2284d, miR-2284ab, miR-2355-5p

MSM01 ENSOARGO(methyltransferase) 296-5p, miR-323b, miR-153, miR-539-5p, miR-1298-3p, miR-9788-3p, miR-455-3p, miR-1185-3p, miR-199b-3p, novel\_78, miR-145b, miR-181b-2-3p, miR-628-3p, miR-499a-5p, miR-2284q, miR-218-5p, miR-107-5p, miR-877-3p, miR-154a, miR-2447, miR-3059-5p, miR-212-3p, miR-885-5p, miR-181d-5p, miR-194b-5p, miR-9-5p, miR-3963, miR-136-5p, miR-668-5p, miR-504, miR-140-5p, miR-499a-3p, miR-1185-2-3p, miR-20a-3p, miR-28-3p, miR-17-3p, miR-181b-5p, miR-127-5p, miR-543-5p, miR-217, miR-3065-3p, novel\_39, miR-1271-3p, miR-4286, miR-1290, miR-134, miR-29d-3p, miR-322-5p, miR-9-5p, miR-758-5p, miR-134-5p, miR-545-5p, novel\_121, miR-6517, miR-1224-5p, miR-191-5p, miR-134-5p, miR-28-5p, miR-29b-3p, miR-135a-1-3p, miR-26c, miR-135a-5p, miR-365a-5p, miR-28a-3p, miR-6128, miR-16-5p, miR-345-5p, let-7g-3p, miR-7144-5p, miR-34c-5p, miR-324-5p, miR-133c, miR-223-5p, miR-370-3p, miR-3956, miR-1271, miR-124-5p, miR-7-5p, miR-365b-5p, miR-3141, miR-194a, miR-345-5p, let-7g-3p, miR-532-3p, miR-26a-2-3p, miR-125b-2-3p, miR-2284l, miR-2284d, miR-2284ab, miR-2355-5p



miR-379-5p, let-7e-5p, miR-410-5p, miR-150-5p, miR-378b, miR-18b, miR-6535, miR-144-3p, miR-677, miR-181b-3p, miR-2404, miR-323a-5p, miR-29a-3p, miR-320b, miR-26b-5p, novel\_68, miR-3074-5p, miR-329-5p, miR-421-5p, miR-22-5p, miR-29a, let-7i, miR-502-5p, miR-133a-5p, miR-20a-5p, miR-3959-3p, miR-29c-3p, miR-26a-2-3p, miR-27b-3p, miR-2284x, miR-380-3p, miR-29b, miR-30b-3p, miR-374b-3p, miR-1434-3p, miR-2113, miR-6238, miR-20b, miR-2284d, miR-412-5p, let-7g-5p, miR-665, miR-3955-5p, miR-133b-5p, miR-330-3p, miR-105-5p, miR-106a-5p, miR-17-5p, miR-224-5p, miR-296-3p, miR-539-3p, miR-296-3p, let-7a-2-3p, miR-503-3p, miR-654-3p, miR-130b-5p, miR-6240, novel\_48, miR-23a-5p, miR-20b-5p, miR-485-5p, miR-671-5p, miR-10b-3p, miR-2318, let-7g-3p, miR-329a, miR-93-5p, miR-18a, miR-23b, miR-17-5p, miR-3154, miR-381-3p, miR-488-3p, miR-324-5p, miR-223-5p, miR-365a-3p, miR-370-3p, miR-141-3p, miR-487a-3p, miR-28-5p, miR-144, miR-29b-3p, miR-34c-3p, miR-2284k, miR-145-3p, miR-93, miR-3607-3p, miR-133a-3p, miR-28a-3p, miR-374b, miR-2284v, miR-105-2, let-7a-2-3p, let-7d, miR-300, miR-2427, miR-29d-3p, miR-23b-5p, miR-545-5p, novel\_121, miR-431, miR-18b-5p, miR-200a-3p, miR-543-5p, novel\_96, miR-28-3p, miR-450a-2-3p, let-7f-5p, miR-3071-3p, let-7c-5p, miR-2285af, miR-125a-3p, let-7g, miR-200a, miR-29a-5p, miR-3065-3p, miR-2284y, miR-192-3p, miR-1271-3p, miR-450b-5p, miR-30a-3p, miR-3064-5p, miR-877-3p, novel\_94, miR-129b-5p, miR-381-3p, let-7d-5p, miR-27a-3p, miR-499a-3p, miR-2483-3p, miR-374b-5p, miR-3064-5p, miR-2284g, miR-2319b, miR-452-3p, miR-154-3p, miR-2284q, miR-2285n, miR-218-5p, miR-2284j, miR-452-5p, novel\_60, miR-3956-3p, miR-21b, miR-3120-5p, miR-362-3p, miR-299a-5p, miR-125b-2-3p, miR-30b-3p, miR-329-3p, miR-143-5p, miR-181b-2-3p, miR-222-5p, miR-27a-3p, miR-105-1, miR-151a-3p, miR-230-3p, miR-2300a-5p, let-7a, miR-191-5p, miR-142a-3p, miR-216c-5p, miR-30a-3p, let-7c-3p, miR-23a-3p, miR-450b-3p, miR-30b-3p, miR-2285n, miR-6402, miR-30e-3p, miR-30a-3p, miR-135a-5p, miR-582-5p, miR-23b-3p, miR-142-3p, miR-23c, miR-450a-1-3p, miR-3068-3p, miR-2285u, miR-3120-3p, miR-30d-3p, miR-450b-3p, let-7g-3p, miR-33b-3p, miR-135b-5p, miR-21a-3p, miR-223-3p, miR-450a-1-3p, miR-450c-3p, miR-150-5p, miR-377-5p, miR-3960, miR-187-3p, miR-9788-3p, miR-322-5p, miR-185-5p, miR-2411-5p, miR-15a-5p, miR-330-5p, miR-329-3p, miR-873a-5p, miR-1843b-5p, miR-362-3p, miR-101c, miR-497-5p, miR-16b, miR-885-3p, miR-362-3p, miR-363-5p, miR-628-5p, miR-101b-3p, miR-424-5p, miR-193a, miR-2411, miR-377-5p, miR-362-3p, miR-16b, miR-92a-1-5p, miR-2285af, miR-196a-3p, miR-326, miR-1306-5p, miR-214-3p, miR-21-3p, miR-760-3p, miR-296-3p, miR-139-5p, miR-378b, miR-669, miR-15b-5p, miR-582-5p, miR-139-5p, miR-1306, miR-21a-3p, miR-2387, miR-885-3p, miR-195a-5p, miR-582-5p, miR-1291, miR-329a, miR-668-5p, miR-16-5p, miR-214, miR-326-3p, miR-371b-3p, miR-16a, miR-409-3p, miR-15a, miR-576-3p, miR-101-3p, miR-203b-5p, miR-7b-5p, miR-574-5p, miR-30d-3p, miR-3600, miR-9-5p, miR-301a-3p, miR-214-5p, miR-30e-3p, miR-6402, miR-7-5p, miR-30a-3p, miR-147-5p, miR-874-5p, miR-454-3p, miR-9-5p, miR-382, miR-30a-3p, miR-148b-5p, miR-301b-3p, miR-376c-5p, miR-376b-5p

CPE ENSOARGO(carboxyp 487a-3p, miR-2284d, miR-323-3p, miR-216b-5p, miR-139-5p, miR-148b-5p, miR-454-5p, miR-139-5p, miR-2284v, miR-432-3p, miR-2483-5p, miR-363-5p, miR-196b-5p, miR-224-5p, miR-377-3p, miR-146a, miR-412-5p, miR-544b, miR-26b-3p, miR-2284ab, miR-138, miR-16-1-3p, miR-26a-2-3p, miR-2284x, miR-542-3p, miR-181a-5p, miR-197-3p, miR-450c-3p, novel\_23, novel\_1, miR-147-5p, miR-133a-5p, miR-146b-3p, miR-669, miR-144-3p, miR-329-5p, miR-216b-3p, miR-3120-3p, miR-10a-5p, miR-450b-3p, miR-19a-3p, miR-412-3p, miR-9851-3p, miR-146b-5p, miR-376b-5p, miR-2285ab, miR-2387, miR-148b-5p, miR-376c-5p, miR-376b-5p, miR-29a-5p, miR-1271-3p, miR-490-3p, miR-3064-5p, miR-30a-3p, miR-2385-3p, miR-181a-2-3p, miR-450a-2-3p, miR-181b-5p, novel\_96, miR-2285af, miR-664-3p, miR-2411-5p, miR-450a-1-3p, miR-582-3p, miR-545-5p, miR-2284z, miR-7641, miR-1224-5p, miR-155-5p, miR-10a-5p, miR-196a-5p, miR-145-3p, miR-3607-3p, miR-6128, miR-138-5p, miR-592, miR-5100, miR-144, miR-6740-5p, miR-370-3p, novel\_48, miR-376c-5p, miR-1814c, miR-488-3p, miR-137-3p, miR-376c-5p, miR-8485, miR-1388-3p, miR-491-5p, miR-3085-3p, miR-146b, miR-153-3p, miR-103a-2-5p, miR-505, miR-153, miR-142-5p, miR-548w, novel\_4, miR-222-5p, miR-544a, miR-2284aa, miR-101c, miR-10b, miR-3962, novel\_111, miR-154a, miR-885-5p, miR-2285f, miR-181d-5p, miR-452-5p, miR-2285t, miR-101-3p, miR-107-5p, miR-203-3p, miR-664b, miR-3064-5p, miR-2319b, miR-499b-5p, miR-504, miR-668-5p, miR-1983, miR-361-3p, miR-129b-5p, miR-376a-5p, miR-2411, miR-2432, miR-146a-5p, miR-143-3p, miR-329a-5p, miR-369-3p, miR-345-3p, miR-21-3p, miR-2285p, miR-122-3p, miR-95-3p, miR-151-5p, miR-3600, miR-1b-3p, miR-30d-3p, miR-33b-3p, miR-19b-3p, miR-16-1-3p, miR-2408, miR-2300b-3p, miR-1246, miR-142a-5p, miR-10b-5p, miR-224-5p, miR-181c-5p, miR-590-3p, miR-145a-3p, miR-450b-3p, miR-664a, miR-155-5p, miR-2285j, miR-30e-3p, miR-30a-3p, miR-3604, miR-10a, miR-544-3p, miR-377-3p, miR-216b-5p, miR-155-5p, miR-151b, miR-

ZMYND11 ENSOARGO(zinc fin. 376c-5p, miR-1814c, miR-488-3p, miR-137-3p, miR-376c-5p, miR-8485, miR-1388-3p, miR-491-5p, miR-3085-3p, miR-146b, miR-153-3p, miR-103a-2-5p, miR-505, miR-153, miR-142-5p, miR-548w, novel\_4, miR-222-5p, miR-544a, miR-2284aa, miR-101c, miR-10b, miR-3962, novel\_111, miR-154a, miR-885-5p, miR-2285f, miR-181d-5p, miR-452-5p, miR-2285t, miR-101-3p, miR-107-5p, miR-203-3p, miR-664b, miR-3064-5p, miR-2319b, miR-499b-5p, miR-504, miR-668-5p, miR-1983, miR-361-3p, miR-129b-5p, miR-376a-5p, miR-2411, miR-2432, miR-146a-5p, miR-143-3p, miR-329a-5p, miR-369-3p, miR-345-3p, miR-21-3p, miR-2285p, miR-122-3p, miR-95-3p, miR-151-5p, miR-3600, miR-1b-3p, miR-30d-3p, miR-33b-3p, miR-19b-3p, miR-16-1-3p, miR-2408, miR-2300b-3p, miR-1246, miR-142a-5p, miR-10b-5p, miR-224-5p, miR-181c-5p, miR-590-3p, miR-145a-3p, miR-450b-3p, miR-664a, miR-155-5p, miR-2285j, miR-30e-3p, miR-30a-3p, miR-3604, miR-10a, miR-544-3p, miR-377-3p, miR-216b-5p, miR-155-5p, miR-151b, miR-

miR-186-5p, miR-34b-5p, miR-129b-3p, miR-450a-1-3p, miR-2285c, miR-151b, miR-2284s, miR-10a, miR-376e-3p, miR-499b-3p, miR-216b-5p, miR-154a-3p, miR-504-5p, miR-30c-1-3p, miR-548o-3p, miR-4492, miR-151-3p, miR-214, miR-129-2-3p, miR-361-5p, miR-217-5p, miR-193b-5p, miR-23b-3p, miR-7859, miR-23c, miR-3653-3p, miR-219b-5p, miR-210-5p, miR-380-3p, miR-664b-3p, miR-376a-5p, miR-376c-3p, miR-181b-1-3p, miR-10a-3p, miR-487a, miR-493-5p, miR-335-3p, miR-1983, miR-504, miR-381-3p, miR-652-3p, miR-1185-2-3p, miR-25, miR-499a-3p, miR-2285u, miR-211-5p, miR-2319b, miR-490-5p, miR-154-3p, miR-877-3p, miR-6527, let-7i-3p, miR-2447, miR-1388-5p, miR-2284r, miR-2459, miR-1185-3p, miR-421, miR-181b-2-3p, miR-1343-3p, miR-330-3p, miR-548w, miR-214-3p, miR-491-5p, miR-323b-3p, miR-505, miR-8485, miR-23a-3p, miR-101b-3p, miR-345-5p, miR-329b, miR-23b, miR-376c-3p, miR-300-3p, miR-542-5p, miR-2285aa, miR-3068-3p, miR-503-3p, miR-6740-5p, miR-1197-3p, miR-28a-3p, miR-450a-1-3p, novel\_121, miR-129-1-3p, miR-486-5p, miR-2285ad, miR-6517, miR-200a-3p, novel\_96, miR-28-3p, miR-3071-3p, miR-205-5p, miR-125a-3p, miR-200a, novel\_39, miR-192-3p, miR-148b-5p, miR-412-3p, miR-1306, miR-3065-5p, miR-3591-3p, miR-677, miR-144-3p, miR-320c, miR-181b-3p, miR-3120-3p, miR-6123, miR-6119-3p, miR-29a, miR-425-5p, novel\_87, miR-4324, miR-576-3p, miR-29c-3p, miR-188-5p, miR-197-3p, miR-450c-3p, miR-708-3p, miR-19b-2-5p, miR-31-5p, miR-103a-3p, miR-105-5p, novel\_51, let-7a-2-3p, miR-432-3p, miR-2284l, let-7f-2-3p, let-7f-2-3p, miR-6240, let-7g-3p, miR-2312, miR-154b-3p, miR-204-3p, miR-877-5p, miR-544-3p, miR-6130, miR-21-3p, miR-3065-3p, miR-221-5p, miR-496-3p, miR-450b-3p, miR-6516-3p, miR-19b-1-5p, miR-6134, miR-10b-5p, miR-425-5p, miR-539-5p, miR-145a-3p, miR-4510, miR-4429, miR-19b-3p, miR-290A, miR-140-3p, miR-188-

miR-378j, miR-3963, novel\_94, miR-452-3p, miR-7977, miR-2483-3p, miR-7857-3p, miR-499a-3p, miR-1185-2-3p, miR-2440, miR-499a-5p, miR-1843a-3p, miR-3956-3p, novel\_60, miR-3059-5p, miR-452-5p, miR-877-3p, miR-154a, miR-1285-5p, miR-330-3p, miR-105-1, novel\_4, miR-145b, miR-153, miR-1185-3p, miR-2459, miR-148b-5p, miR-455-3p, miR-320b, miR-3955-3p, miR-153-3p, miR-146b, miR-2284b, miR-30c-1-3p, miR-2310, miR-450a-1-3p, miR-487b-5p, miR-433-3p, miR-598-3p, miR-133b-3p, miR-186-5p, novel\_99, miR-1827, miR-30c-1-3p, miR-370-5p, miR-323-5p, miR-499b-3p, miR-338-5p, miR-17-3p, miR-450b-3p, miR-130b-5p, miR-208b-5p, miR-3184-3p, miR-3074-5p, miR-224-5p, miR-6525, miR-1197-5p, miR-217-5p, miR-4429, miR-142-3p, miR-493-3p, miR-2284u, miR-148a-5p, miR-18a-3p, miR-3600, miR-340-5p, miR-383-5p, novel\_17, miR-196a-3p, miR-92a-1-5p, miR-320d, miR-299-3p, miR-21-3p, miR-216c-5p, miR-125b-2-3p, miR-146a-5p, miR-3065-5p, miR-18a-3p, miR-150-5p, miR-146b-5p, miR-2319a, miR-3074-5p, miR-655-5p, miR-374c-3p, miR-411b-3p, miR-670-3p, miR-299b-3p, miR-2404, miR-323a-5p, miR-320c, miR-6119-3p, miR-135a-2-3p, miR-17-3p, miR-1193, novel\_27, miR-145a-5p, miR-450c-3p, miR-26b-3p, miR-146a, miR-224-5p, miR-330-3p, miR-105-5p, miR-378a-5p, miR-6240, miR-130b-5p, let-7f-2-3p, let-7f-2-3p, miR-320a, miR-329b, miR-876-3p, miR-7144-5p, miR-615-5p, miR-1271, miR-141-3p, miR-598-3p, miR-370-3p, miR-374c-3p, miR-494-5p, miR-370-5p, miR-409-3p, miR-100-3p, miR-133a-3p, miR-105-2, miR-299a-3p, miR-582-3p, miR-450a-1-3p, miR-217, miR-30c-2-3p, miR-17-3p, miR-450a-2-3p, novel\_127, miR-200a-3p, miR-3529-3p, miR-2478, miR-148b-5p, miR-3956-5p, miR-200a, miR-2284y, miR-29a-5p

miR-432, miR-708-3p, miR-1434-3p, miR-7b-5p, miR-3071-5p, novel\_23, miR-374b-3p, miR-2284ab, miR-16b, miR-1260b, miR-497-5p, miR-31-5p, miR-133b-5p, miR-26b-3p, miR-432-5p, miR-2285g, miR-149-5p, miR-2355-3p, miR-7-5p, miR-146a, miR-377-3p, miR-296-3p, miR-190a, miR-466f-3p, miR-101-5p, let-7f-2-3p, let-7f-2-3p, miR-628-5p, miR-432-3p, miR-2285r, miR-432-3p, miR-296-3p, miR-345-5p, miR-503-3p, miR-2285ab, miR-2387, miR-150-5p, miR-3970, miR-412-3p, miR-146b-5p, miR-135b-5p, miR-6395, miR-195a-5p, novel\_68, miR-216b-3p, miR-3120-3p, miR-677, miR-320c, miR-181b-3p, miR-15a, miR-16a, miR-33a-3p, novel\_1, miR-421-5p, miR-6123, miR-199c, miR-219b-3p, miR-1a-1-5p, novel\_101, miR-758-5p, miR-17-3p, miR-495-3p, miR-2285x, miR-211, miR-326-3p, novel\_27, miR-345-3p, miR-3591-5p, miR-2427, miR-330-5p, miR-23b-5p, miR-200b-3p, miR-496, miR-2285ad, miR-429-3p, miR-6517, miR-9-5p, miR-505-5p, miR-322-5p, miR-302a-5p, miR-545-5p, novel\_121, miR-205-5p, miR-1260a, miR-2285af, miR-200c, miR-125a-3p, miR-217, miR-450a-2-3p, miR-17-3p, miR-1a-2-5p, miR-200c-3p, miR-200a-3p, miR-543-5p, miR-3529-3p, miR-30a-3p, miR-4286, miR-450b-5p, miR-200a, miR-1957a, miR-2285b, miR-490-3p, miR-488-3p, miR-301, miR-320a, miR-3154, miR-10b-3p, miR-345-5p, miR-329b, miR-7144-5p, miR-1248, miR-671-5p, miR-485-5p, miR-1814c, miR-503-3p, miR-215-5p, miR-141-3p, miR-3965, miR-324-5p, miR-1-5p, miR-2332, miR-5100, miR-3969, miR-135a-5p, miR-204-5p, miR-374b-3p, miR-16-5p, miR-6128, miR-1260b, miR-7857, miR-1388-5p, miR-2426, miR-101a-5p, miR-101c, miR-3120-5p, miR-199b-3p, novel\_4, miR-548w, miR-5010-3p, miR-181b-2-3p, miR-539-5p, miR-455-3p, miR-1185-3p, miR-2285e, miR-2459, miR-320b, miR-326, miR-2957, miR-16b, miR-182-5p, novel\_124, miR-146b, miR-101b-3p, miR-424-5p, miR-8485, miR-2310, miR-1b-5p, miR-668-5p, miR-1082, miR-9-3p, miR-30a-3p, miR-129b-5p, miR-488-3p, miR-664-3p, miR-2426, miR-30a-3p, miR-30d-3p, miR-489, miR-125b-2-3p, miR-7-5p, miR-320b, miR-320d, miR-1343-3p, miR-548e-3p, miR-7859, miR-217-5p, miR-1290, miR-7b-5p, miR-193b-5p, miR-708-3p, miR-2284x, miR-21b, miR-155-5p, miR-19b-3p, miR-4429, miR-2285x, miR-335-5p, miR-6134, miR-2284w, miR-2332, miR-2285j, miR-15b-3p, miR-203b-5p, miR-155-5p, miR-335, miR-7-1-3p, miR-548o-3p, miR-155-5p, miR-320c, miR-489, miR-499a-3p, miR-320a, miR-19a-3p, miR-145a-3p, miR-17-3p, miR-376b, miR-29b-2-5p, miR-1, miR-206-3p, miR-29b-1-5p, miR-2285b, miR-29b-2-5p, miR-29b-1-5p, miR-17-3p, miR-206, miR-17-3p, miR-487a-5p, miR-216a-3p, miR-2113, miR-1a-3p, miR-16-1-3p, miR-16-1-3p, miR-543-3p

PDCD6IP ENSOARGO(programm

IL18 ENSOARGO(interleu

RAB18 ENSOARGO(RAB18, m

NAB1 ENSOARGO(NGFI-A b

miR-199b-5p, miR-2285x, miR-3957-3p, miR-342-3p, miR-6123, miR-181b-3p, miR-677, miR-10a-5p, miR-378f, miR-410-5p, miR-3970, miR-148a-3p, miR-345-5p, miR-101-5p, miR-130b-5p, miR-125a-5p, novel\_51, miR-194a, miR-2355-3p, miR-185-5p, miR-377-5p, miR-339-5p, miR-2284x, miR-194-5p, miR-3071-5p, miR-2113, miR-653, miR-378c, miR-6128, miR-125b-5p, miR-6740-5p, miR-5100, miR-154b-5p, miR-376c-3p, miR-199a-5p, miR-769, miR-125a, miR-485-5p, miR-1248, miR-345-5p, miR-200a-5p, miR-199a-5p, miR-29a-5p, miR-3065-3p, miR-2284y, miR-152-3p, novel\_96, miR-339a, miR-205-5p, miR-378h, novel\_79, miR-6517, miR-10a-5p, miR-501-3p, miR-218-2-3p, miR-502-3p, miR-194b-5p, miR-452-5p, miR-3059-5p, miR-1843a-3p, miR-4726-5p, miR-301a-5p, miR-107-5p, miR-769-5p, miR-500-3p, miR-203-3p, miR-3082-5p, miR-7857-3p, miR-378e, miR-7977, miR-2284g, miR-877-3p, miR-504, miR-129b-5p, miR-199b-5p, miR-378d, miR-214-3p, miR-103a-2-5p, miR-199b-5p, miR-491-5p, miR-342, miR-9788-3p, miR-216a-3p, miR-148b-5p, miR-181b-2-3p, miR-548w, miR-3120-5p, miR-378c, miR-758-3p, miR-501-3p, miR-301b-5p, miR-10b, miR-378b, miR-10b-5p, miR-769-5p, miR-214, miR-2330-3p, miR-3958-5p, miR-378c, miR-539-5p, miR-130b-5p, miR-129-5p, miR-208b-5p, miR-664a, miR-6516-3p, miR-15b-3p, miR-2285j, novel\_32, miR-10a, miR-376e-3p, miR-3065-3p, miR-504-5p, miR-378a-3p, miR-140-5p, miR-345-5p, miR-339b, miR-433-3p, miR-376c-3p, miR-181b-1-3p, miR-377-5p, miR-195a-3p, miR-760-3p, miR-422a, miR-125b, miR-148b-3p, miR-7859, miR-548e-3p, miR-2284u, novel\_73, miR-378a-3p, miR-1197-5p, miR-193b-5p, miR-2300b-3p, miR-378i

miR-1260b, miR-323-3p, miR-370-5p, miR-2284k, miR-138-5p, miR-486b-3p, miR-141-3p, miR-331-5p, miR-34c-5p, miR-2448-3p, miR-30e-5p, miR-3154, miR-320a, miR-329a, novel\_91, miR-345-5p, let-7g-3p, miR-671-5p, miR-23a-5p, miR-380-5p, miR-2285b, novel\_39, let-7g, miR-29a-5p, miR-664-3p, miR-1260a, let-7c-5p, let-7f-5p, miR-127-5p, miR-181b-5p, miR-200a-3p, miR-543-5p, miR-6517, miR-758-5p, miR-1271-5p, miR-302a-5p, miR-2284z, miR-345-3p, miR-23b-5p, miR-30a-5p, miR-582-3p, let-7d, let-7a-2-3p, miR-105-2, miR-335-5p, miR-1193, novel\_101, miR-2428, miR-449a, miR-6402, let-7i, miR-34c, novel\_1, miR-625-3p, novel\_68, miR-26b-5p, miR-3120-3p, miR-34b, miR-146b-3p, miR-181b-3p, miR-320c, miR-677, miR-3591-3p, miR-6395, miR-6516-3p, let-7e-5p, miR-9851-3p, miR-380-5p, miR-130b-5p, miR-432-3p, miR-2285r, miR-432-3p, miR-345-5p, miR-503-3p, let-7a-2-3p, miR-539-3p, miR-7-5p, miR-224-5p, miR-2411-3p, miR-2331-5p, miR-105-5p, miR-466f-3p, miR-31-5p, miR-3955-5p, let-7g-5p, miR-185-5p, miR-2284d, miR-2355-3p, miR-7b-5p, miR-181a-5p, miR-1434-3p, miR-873a-5p, miR-197-3p, miR-22-3p, miR-1260b, miR-16-1-3p, miR-219a-1-3p, miR-2284ab, miR-138, miR-30b-3p, miR-2284x, miR-4510, let-7b, miR-539-5p, miR-214, miR-3074-2-3p, miR-1271, miR-224-5p, miR-181c-5p, miR-338-3p, let-7b-5p, let-7f, miR-665, miR-324-3p, miR-6516-3p, miR-130b-5p, miR-4492, miR-874-5p, miR-221-5p, miR-140-5p, miR-216b-3p, miR-21-3p, miR-370-5p, miR-6130, miR-139-5p, let-7i-5p, miR-22-3p, miR-21a-3p, miR-30d-5p, miR-411, miR-345-5p, let-7g-3p, miR-186-5p, miR-543-3p, miR-183-5p, miR-181b-1-3p, miR-486-3p, miR-26a-5p, novel\_17, miR-2285p, miR-345-3p, miR-98-5p, miR-2284m, miR-320d, let-7k, miR-21-3p, miR-221-5p, miR-34b-5p, miR-548e-3p, miR-485-3p, miR-487a-3p, miR-328-3p, miR-362-3p, miR-2300b-3p, miR-1061, miR-1102, miR-5702, miR-1193, miR-150-5p, miR-1843b-5p, miR-488-3p, miR-432, miR-379-5p, novel\_99, miR-7144-5p, miR-452-3p, miR-2355-3p, miR-432-5p, miR-185-3p, miR-29b-2-5p, miR-324-3p, miR-331-3p, miR-205-5p, miR-3074-2-3p, miR-181a-2-3p, miR-29b-2-5p, miR-2355-3p, miR-148b-3p, miR-495-3p, miR-26a-2-3p, miR-22-5p, miR-669a-3p, miR-152-3p, miR-127-5p, miR-505, miR-382-3p, miR-148a-3p, miR-2424, miR-2285r, miR-33a-5p, miR-152-3p, miR-200a-3p, miR-6536, miR-323b-3p, miR-505, miR-205-5p, miR-2285e, miR-129-1-3p, miR-412-5p, miR-2285g, miR-148b-3p, miR-133b-5p, novel\_4, miR-361-5p, miR-582-3p, miR-323b, miR-7857, miR-1197-5p, miR-301b-5p, miR-6525, miR-3607-3p, miR-2285f, novel\_60, miR-3956-3p, miR-129-2-3p, miR-22-5p, miR-6740-5p, miR-371a-5p, miR-301a-5p, miR-3969, miR-665, miR-502-5p, miR-670-3p, novel\_69, miR-2355-5p, miR-3120-3p, miR-141-3p, miR-2319a, miR-7144-5p, miR-23a-5p, miR-6516-3p, miR-2312, miR-361-3p, miR-2285ab, miR-2285c, miR-148a-3p

SDAD1 ENSOARGO(SDA1 domain)

COPZ1 ENSOARGO(coatomer)

YTHDC2 ENSOARGO(YTH domain)

PPP1R3C ENSOARGO(protein)

miR-4429, miR-1197-5p, miR-140-3p, miR-1193, novel\_133, miR-1246, miR-616-3p, novel\_83, miR-199a-3p, miR-383-5p, miR-200b, miR-222-5p, miR-1b-3p, miR-34b-5p, miR-221-5p, miR-299-3p, miR-21-3p, miR-320d, miR-466i-5p, miR-185-3p, miR-196a-3p, miR-542-5p, miR-146a-5p, miR-29b-1-5p, miR-130a-5p, miR-183-5p, miR-582-5p, novel\_99, let-7g-3p, miR-21a-3p, novel\_32, miR-155-5p, miR-6516, miR-193b-3p, miR-139-5p, miR-3065-3p, miR-370-5p, miR-182-5p, miR-221-5p, miR-140-5p, miR-545-3p, miR-378a-3p, miR-660-5p, miR-487a-5p, miR-155-5p, miR-222-3p, miR-6134, miR-378c, miR-539-5p, miR-145a-3p, miR-378c, miR-450b-5p, miR-125b-2-3p, miR-484, miR-378b, miR-221-3p, novel\_4, miR-542-5p, miR-3085-3p, miR-320b, miR-30c-1-3p, let-7c-3p, miR-33a-5p, miR-376b, miR-1839-3p, miR-378e, miR-541-5p, miR-7977, miR-3064-5p, miR-452-3p, miR-20a-3p, miR-4726-5p, miR-335, miR-371a-5p, miR-2285y, miR-2285n, miR-8095, miR-194b-5p, miR-3059-5p, miR-541-3p, miR-200b-3p, miR-411-3p, miR-582-3p, miR-29d-3p, miR-615-3p, miR-545-5p, miR-24-2-5p, miR-6516-5p, miR-378h, miR-7641, miR-222, miR-92a-3p, miR-543-5p, miR-2898, miR-30c-2-3p, miR-339a, miR-217, miR-1260a, miR-376c-5p, miR-376b-5p, miR-3065-3p, miR-2284a, miR-490-3p, miR-380-5p, miR-2478, miR-24-2-5p, novel\_48, miR-7144-5p, miR-376c-5p, miR-320a, miR-3154, miR-488-3p, miR-2448-3p, miR-503-3p, miR-154b-5p, miR-34c-5p, miR-615-5p, miR-486b-3p, miR-410-5p, miR-29b-3p, miR-370-5p, miR-5100, miR-2332, miR-10b-3p, miR-378c, miR-145-3p, miR-29b, miR-1260b, miR-219a-1-3p, miR-194-5p, miR-873a-5p, miR-503-5p, miR-377-5p, miR-660, miR-452-5p, miR-136-3p, miR-224-5p, miR-503-5p, miR-345-5p, miR-363-5p, miR-6395, miR-2387, miR-670-3p, miR-34b, miR-29a-3p, miR-320b, miR-378b, miR-203b-5p, miR-92a-3p, miR-34c, miR-382-5p, miR-502-5p, miR-133a-5p, miR-6402, miR-449a, miR-322c, miR-24-3p, miR-769-5p, miR-16a, miR-34c, novel\_87, miR-502-5p, miR-15a, miR-2440, miR-28c, miR-490-5p, miR-6119-3p, miR-449a, miR-199b-5p, miR-362-5p, miR-3591-3p, miR-361-3p, miR-199b-5p, miR-195a-5p, miR-450b-3p, miR-139-5p, novel\_68, miR-677, miR-181b-3p, miR-670-3p, miR-34b, miR-2483-3p, miR-105-5p, miR-362-3p, miR-16b, novel\_51, miR-199b-5p, miR-124-5p, miR-744-3p, miR-130b-5p, miR-424-5p, miR-1b-5p, miR-432-3p, miR-22841, miR-7857, miR-450c-3p, miR-873a-5p, miR-329-3p, miR-497-5p, miR-362-3p, miR-16b, miR-1260b, miR-181b-2-3p, novel\_78, miR-105-1, miR-1343-3p, miR-149-5p, miR-500-5p, miR-496-5p, miR-185-5p, miR-147a, miR-30a-3p, miR-331-3p, miR-30e-3p, miR-708-5p, miR-424-5p, miR-130b-5p, miR-28-5p, miR-450b-3p, miR-16-5p, miR-6128, miR-425-5p, miR-1306-5p, miR-769-5p, miR-500b-5p, miR-1260b, miR-362-5p, miR-3154, miR-450a-1-3p, miR-23a-5p, miR-7144-5p, miR-625-5p, miR-329a, miR-21-3p, miR-2355-5p, miR-199a-5p, miR-15b-5p, miR-2284s, miR-34c-5p, miR-139-5p, miR-769, miR-324-3p, miR-1260a, miR-34b-5p, miR-543-5p, miR-760-3p, miR-466i-5p, miR-30a-3p, miR-4286, miR-181a-2-3p, miR-199a-5p, miR-1957a, miR-28b, miR-181b-1-3p, miR-23b-5p, miR-362-3p, miR-2366, miR-105-2, miR-133a-3p, miR-34a-5p, miR-361-5p, miR-582-3p, miR-548e-3p, miR-450a-1-3p, miR-214-5p, miR-322-5p, miR-15a-5p



|        |                    |                                                                                                                                                                                                                                                                                                                                                                                                                                                                                                                                                                                                                                                                                                                                                                                                                                                                                                                                                                                                                                                                                                                                                                                                                                                                                                                                                                                                        |
|--------|--------------------|--------------------------------------------------------------------------------------------------------------------------------------------------------------------------------------------------------------------------------------------------------------------------------------------------------------------------------------------------------------------------------------------------------------------------------------------------------------------------------------------------------------------------------------------------------------------------------------------------------------------------------------------------------------------------------------------------------------------------------------------------------------------------------------------------------------------------------------------------------------------------------------------------------------------------------------------------------------------------------------------------------------------------------------------------------------------------------------------------------------------------------------------------------------------------------------------------------------------------------------------------------------------------------------------------------------------------------------------------------------------------------------------------------|
| CNIH4  | ENSOARGO(cornicho) | miR-3120-3p, miR-409b, miR-149-5p, miR-142a-3p, miR-142-3p, miR-22841, miR-2404                                                                                                                                                                                                                                                                                                                                                                                                                                                                                                                                                                                                                                                                                                                                                                                                                                                                                                                                                                                                                                                                                                                                                                                                                                                                                                                        |
| SUN3   | ENSOARGO(Sad1 and) | miR-576-3p, miR-30e-3p, miR-194a, miR-365b-5p, miR-3071-3p, miR-30a-3p, miR-202-5p, miR-21-3p, miR-382-3p, miR-194b-5p, miR-30a-3p, miR-125b-2-3p, miR-154a, miR-29a-5p, miR-145-3p, miR-365a-5p, miR-1957a, miR-21a-3p, miR-1197-5p, miR-3071-5p, miR-194-5p, miR-544a, miR-335-3p, miR-140-5p, novel_68, miR-758-5p, miR-544-3p, miR-544b, miR-532-3p, miR-452-5p, miR-199b-5p, miR-660, miR-1468, miR-466f-3p, miR-483-3p, novel_124, miR-2411-3p, miR-194a, miR-320b, miR-382-3p, miR-16-2-3p, miR-30b-3p, miR-197-3p, miR-194-5p, novel_23, miR-30b-3p, miR-2355-3p, miR-412-5p, miR-147a, miR-5010-3p, miR-181b-2-3p, miR-151a-3p, miR-409b, miR-1343-3p, miR-203b-5p, miR-2285y, novel_82, miR-199b-5p, miR-361-3p, miR-194b-5p, miR-3059-5p, miR-335-3p, miR-3963, miR-136-5p, miR-18a-3p, miR-361-3p, miR-199b-5p, miR-144-3p, miR-320c, miR-669, miR-677, miR-181b-3p, miR-7689-3p, miR-4792, miR-221-5p, miR-543-5p, novel_127, miR-320d, miR-466i-5p, miR-216a-5p, miR-345-3p, miR-185-3p, miR-199a-5p, miR-192-3p, miR-181b-1-3p, miR-4429, miR-218-2-3p, miR-345-3p, miR-214-5p, miR-7859, miR-483-3p, miR-6516-5p, miR-212-5p, miR-2285ad, miR-548e-3p, miR-18a-3p, miR-1468-5p, miR-208b-5p, miR-144, miR-331-3p, miR-151-3p, miR-6134, miR-1306-5p, miR-7144-5p, miR-320a, novel_25, miR-199a-5p, miR-376c-3p, miR-376e-3p, miR-6516, miR-2355-5p, miR-221-5p, miR-660-5p, miR-874-3p |
| MFSD6  | ENSOARGO(major fa) | miR-197-3p, miR-412-3p, miR-378a-3p, miR-30b-3p, miR-330-5p, miR-140-3p, miR-378i, miR-378b, miR-296-5p, miR-30b-3p, miR-378c, miR-19b-3p, miR-1260b, miR-412, miR-222, miR-455-3p, miR-221-3p, miR-412-5p, miR-378h, miR-3431, miR-422a, miR-1260a, miR-326, miR-1306-5p, miR-486-3p, miR-378d, miR-1306, miR-361-3p, miR-221, miR-1895, miR-378f, miR-19a-3p, miR-216b-3p, miR-378a-3p, miR-545-3p, miR-378b, miR-452-3p, miR-154b-5p, miR-378e, miR-489, miR-3604, miR-664a-5p, miR-222-3p, miR-5100, miR-2285t, miR-486b-3p, miR-193a-5p, miR-665-5p, miR-378c, miR-326-3p, miR-378c, miR-877-3p, miR-1260b, novel_133, miR-503-5p, miR-409-3p, miR-3970, miR-543-5p, miR-129-2-3p, miR-503-5p, miR-7977, miR-503-5p, miR-505-5p, miR-129-1-3p                                                                                                                                                                                                                                                                                                                                                                                                                                                                                                                                                                                                                                                     |
| NELFCD | ENSOARGO(negative) | miR-18b, miR-18a, miR-30d-5p, miR-1291, miR-181a-3p, miR-30f, miR-18a-5p, miR-369-5p, miR-874-3p, miR-30b-5p, miR-6529b, miR-29d-5p, miR-665, miR-1306-5p, miR-3607-3p, miR-29c-5p, miR-181c-3p, miR-30c-5p, miR-2300b-3p, miR-2408, miR-197-3p, miR-30b-3p, miR-30a-5p, miR-30b-3p, miR-18b-5p, miR-222-5p, miR-222-5p, miR-214-5p, miR-30b, miR-125a-3p, miR-30d, miR-432-3p, miR-8485, miR-1271-3p                                                                                                                                                                                                                                                                                                                                                                                                                                                                                                                                                                                                                                                                                                                                                                                                                                                                                                                                                                                                  |
| SMUG1  | ENSOARGO(single-s) |                                                                                                                                                                                                                                                                                                                                                                                                                                                                                                                                                                                                                                                                                                                                                                                                                                                                                                                                                                                                                                                                                                                                                                                                                                                                                                                                                                                                        |
| LRRC27 | ENSOARGO(leucine)  |                                                                                                                                                                                                                                                                                                                                                                                                                                                                                                                                                                                                                                                                                                                                                                                                                                                                                                                                                                                                                                                                                                                                                                                                                                                                                                                                                                                                        |

|          |                   |                                                                                                                                                                                                                                                                                                                                                                                                                                                                                                                                                                                                                                                                                                                                                                                                                                                                                                                                                                                                                                                                                                                                                                                                                                                                                                                                                                                                                                                                                                                                                                                                                                                                                                                                                                                                                                                                                                                                                                                                                                                                                                          |
|----------|-------------------|----------------------------------------------------------------------------------------------------------------------------------------------------------------------------------------------------------------------------------------------------------------------------------------------------------------------------------------------------------------------------------------------------------------------------------------------------------------------------------------------------------------------------------------------------------------------------------------------------------------------------------------------------------------------------------------------------------------------------------------------------------------------------------------------------------------------------------------------------------------------------------------------------------------------------------------------------------------------------------------------------------------------------------------------------------------------------------------------------------------------------------------------------------------------------------------------------------------------------------------------------------------------------------------------------------------------------------------------------------------------------------------------------------------------------------------------------------------------------------------------------------------------------------------------------------------------------------------------------------------------------------------------------------------------------------------------------------------------------------------------------------------------------------------------------------------------------------------------------------------------------------------------------------------------------------------------------------------------------------------------------------------------------------------------------------------------------------------------------------|
| DGKQ     | ENSOARGO(diacylgl | <p>miR-4492, miR-874-5p, miR-424-5p, miR-665, miR-2433, miR-378c, miR-122-5p, miR-145-3p, miR-3184-5p, miR-6134, miR-6525, miR-1271, miR-16-5p, miR-214, miR-378c, miR-7144-5p, miR-671-5p, miR-2474, miR-345-5p, miR-329a, miR-345-5p, miR-204-3p, miR-22-3p, miR-15b-5p, miR-154b-5p, miR-377-3p, miR-370-3p, miR-2355-5p, miR-615-5p, miR-221-5p, miR-2331-3p, miR-378a-3p, miR-874-3p, miR-221-5p, novel_127, miR-152-3p, miR-21-3p, miR-760-3p, miR-191-3p, miR-324-3p, miR-3601, miR-422a, novel_39, miR-143-3p, miR-184-3p, miR-7134-5p, miR-5703, miR-378a-3p, miR-378i, miR-362-3p, novel_83, miR-1247-5p, miR-322-5p, miR-378h, miR-148b-3p, miR-1271-5p, miR-15a-5p, miR-18a-3p, miR-423-3p, miR-6517, miR-4726-5p, miR-16a, miR-425-5p, miR-15a, miR-423-5p, miR-2428, miR-361-3p, novel_101, miR-342-3p, miR-2447, miR-378f, miR-195a-5p, miR-96-5p, miR-1306, miR-18a-3p, miR-361-3p, miR-3141, miR-148a-3p, miR-6535, miR-4443, miR-378e, miR-146b-3p, miR-670-3p, miR-7977, miR-452-3p, miR-214-3p, miR-362-3p, miR-3141, novel_51, miR-16b, miR-342, miR-1306-5p, miR-582, miR-377-3p, miR-8485, miR-4532, miR-345-5p, miR-378d, miR-628-5p, miR-744-3p, miR-1388-3p, miR-424-5p, miR-497-5p, miR-4508, miR-362-3p, miR-30b-3p, miR-378c, miR-16b, miR-450b-5p, miR-22-3p, miR-197-3p, miR-30b-3p, miR-378b, miR-329-3p, miR-3431, miR-26b-3p, miR-187-3p, miR-1343-3p, miR-2300a-5p</p> <p>miR-194-5p, miR-30b-3p, miR-2889, miR-27b-3p, miR-885-3p, miR-30b-3p, miR-219a-1-3p, miR-381-5p, miR-27a-3p, miR-3960, miR-151-5p, miR-1185-3p, miR-134-3p, miR-194a, miR-185-3p, miR-377-3p, miR-381-5p, novel_124, miR-466i-5p, miR-1388-3p, miR-127-3p, novel_39, miR-486-3p, miR-2432, miR-129b-5p, miR-361-3p, miR-301, miR-885-3p, miR-625-5p, miR-1291, miR-147-3p, miR-1271, miR-574-5p, miR-151b, miR-27a-3p, miR-1185-2-3p, miR-377-3p, miR-378g, miR-6130, novel_69, miR-664a-5p, miR-2433, miR-4492, miR-486b-3p, miR-128-1-5p, miR-495-3p, miR-194b-5p, miR-4510, miR-3184-5p, miR-423-5p, miR-2284w, miR-361-3p</p> <p>miR-941, miR-669, miR-744-5p, miR-2433, miR-615-5p</p> |
| HOXC6    | ENSOARGO(homeobox |                                                                                                                                                                                                                                                                                                                                                                                                                                                                                                                                                                                                                                                                                                                                                                                                                                                                                                                                                                                                                                                                                                                                                                                                                                                                                                                                                                                                                                                                                                                                                                                                                                                                                                                                                                                                                                                                                                                                                                                                                                                                                                          |
| MAPK8IP3 | ENSOARGO(mitogen- |                                                                                                                                                                                                                                                                                                                                                                                                                                                                                                                                                                                                                                                                                                                                                                                                                                                                                                                                                                                                                                                                                                                                                                                                                                                                                                                                                                                                                                                                                                                                                                                                                                                                                                                                                                                                                                                                                                                                                                                                                                                                                                          |

miR-33a-5p, miR-424-5p, miR-382-3p, miR-193a, miR-758-3p, miR-362-3p, miR-505, miR-29b-1-5p, miR-182-5p, miR-16b, miR-320b, miR-431-5p, miR-214-3p, miR-2285o, novel\_124, miR-1343-3p, miR-2300a-5p, miR-330-3p, miR-216a-3p, miR-147a, miR-758-3p, miR-329-3p, miR-2284r, miR-16-2-3p, miR-1388-5p, miR-362-3p, miR-101a-5p, miR-194b-5p, miR-181d-5p, miR-452-5p, miR-3059-5p, miR-2447, novel\_82, miR-615, miR-490-5p, miR-374a-3p, miR-3968, miR-4726-5p, miR-20a-3p, miR-203-3p, miR-4443, miR-499a-3p, miR-3596, miR-2483-3p, miR-3963, miR-299b-5p, miR-147-3p, miR-216c-5p, miR-486-3p, miR-2411, miR-29b-1-5p, miR-421-5p, miR-324-3p, miR-122-3p, miR-320d, miR-760-3p, miR-466i-5p, miR-3600, miR-18a-3p, miR-3960, miR-548e-3p, miR-1247-5p, miR-383-5p, miR-15a-5p, miR-200b, miR-1197-5p, novel\_133, miR-362-3p, miR-1246, miR-4429, miR-3074-2-3p, miR-214, miR-4510, miR-145a-3p, miR-6134, miR-181c-5p, miR-206-3p, miR-3604, miR-665, miR-129-5p, miR-424-5p, miR-664a, miR-3065-3p, novel\_107, miR-182-5p, miR-545-3p, miR-2331-3p, miR-548o-3p, miR-22-3p, novel\_32, miR-204-3p, miR-15b-5p, miR-6130, miR-129b-3p, miR-1895, miR-1827, novel\_99, miR-363-5p, miR-668-3p, miR-101-5p, miR-6240, miR-330-3p, novel\_51, miR-194a, miR-136-3p, miR-452-5p, miR-31-5p, miR-187-3p, miR-103a-3p, miR-149-5p, miR-194-3p, miR-103, miR-432-5p, miR-22-3p, miR-197-3p, miR-194-5p, miR-374b-3p, miR-432, miR-181a-5p, miR-497-5p, miR-2284x, miR-744-5p, miR-29b, miR-16b, miR-3957-3p, novel\_101, miR-495-3p, miR-29c-3p, miR-136-3p, miR-16a, miR-15a, miR-6529b, miR-421-5p, miR-656-5p, miR-206, miR-29a, miR-320c, miR-669, miR-677, miR-181b-3p, miR-29a-3p, miR-216a-3p, miR-18a-3p, miR-195a-5p, miR-107, miR-4286, miR-3065-3p, miR-376c-5p, miR-1271-3p, miR-664-3p, miR-200c, miR-107, novel\_127, miR-200a-3p, miR-2898, miR-181b-5p, miR-200c-5p, miR-93, miR-193a-5p, miR-3074-2-3p, miR-28a-3p, miR-539-5p, miR-4510, miR-208b-5p, miR-374b-3p, miR-138-5p, miR-376e-3p, miR-6130, miR-20b-5p, miR-93-5p, miR-17-5p, novel\_39, miR-2411, miR-1957a, miR-192-3p, miR-181b-1-3p, miR-20a, miR-329a-5p, miR-1277-5p, miR-106a, miR-450a-2-3p, miR-28-3p, miR-376b-3p, miR-199a-3p, miR-2284z, miR-2411-5p, miR-1b-3p, miR-376a-5p, miR-106a, miR-625-3p, miR-199c, miR-33a-3p, miR-20a-5p, miR-677, miR-27a-3p, miR-181b-3p, miR-376d, miR-3082-5p, miR-3120-3p, miR-329-5p, miR-376a-3p, miR-7975, miR-376a-2-5p, miR-450b-3p, miR-376b-3p, miR-106a-5p, miR-494-3p, miR-660, miR-197-5p, miR-323b-3p, miR-106a-5p, miR-106b-5p, miR-17-5p, miR-199a-3p, miR-20b, miR-376b-3p, miR-1298-3p, miR-145b, miR-181b-2-3p, miR-27a-3p, miR-199b-3p, novel\_78, miR-2284aa, miR-27b-3p, miR-7862, miR-138, miR-101a-5p, miR-323b, miR-7857, miR-145a-5p, miR-125b-2-3p, miR-2284r

DDX59

ENSOARGO( DEAD

(As:

RPAP2

ENSOARGO( RNA poly

yl

miR-6402, miR-133a-5p, miR-2440, novel\_82, novel\_1, miR-3968, miR-147-5p, miR-2284q, miR-421-5p, miR-2285t, miR-490-5p, miR-203b-5p, novel\_120, miR-17-3p, miR-361-3p, miR-199b-5p, miR-199b-5p, miR-148a-3p, miR-3591-3p, miR-150-5p, miR-10a-5p, miR-499b-5p, miR-374c-3p, miR-411b-3p, miR-489, miR-144-5p, miR-6535, miR-377-3p, miR-224-5p, miR-455-5p, miR-2411-3p, miR-323b-3p, miR-3955-3p, miR-466f-3p, miR-660, miR-199b-5p, miR-432-3p, miR-10b, miR-2113, miR-143-5p, miR-873a-5p, miR-125b-2-3p, novel\_23, miR-450c-3p, miR-323b, miR-101a-5p, miR-16-1-3p, miR-455-5p, miR-188-5p, miR-2284aa, miR-26b-3p, miR-665, miR-1298-3p, miR-2284d, miR-411-

AK7 ENSOARGO(adenylat 5p, novel\_116, miR-455-3p, miR-2332, miR-410-5p, miR-331-3p, miR-6740-5p, miR-6516-3p, miR-17-3p, miR-450b-3p, miR-669a-3p, miR-1306-5p, miR-144-5p, miR-224-5p, miR-10b-5p, miR-450a-1-3p, miR-376c-5p, miR-137-3p, miR-2318, miR-329b, miR-186-5p, miR-660-5p, miR-21-3p, miR-10a, miR-377-3p, miR-374c-3p, miR-199a-5p, miR-6119-5p, miR-92a-1-5p, miR-345-3p, miR-3071-3p, miR-17-3p, miR-21-3p, miR-152-3p, miR-2285w, miR-216c-5p, miR-181a-2-3p, miR-125b-2-3p, miR-2478, miR-192-3p, miR-199a-5p, miR-2300b-3p, miR-1290, miR-193b-5p, miR-2366, miR-345-3p, miR-10a-5p, miR-218-1-3p, miR-16-1-3p, miR-423-3p, miR-148b-3p, miR-758-5p, miR-24-2-5p, miR-302a-5p, miR-2284z, miR-545-5p, miR-450a-1-3p miR-30d-3p, miR-450a-1-3p, miR-505-5p, miR-302a-5p, miR-1434-5p, miR-5703, miR-2904, miR-345-3p, novel\_133, miR-378d, miR-4429, miR-582-3p, miR-493-3p, miR-216c-5p, miR-486-3p, miR-200a, novel\_39, miR-199a-5p, miR-345-3p, miR-3071-3p, miR-200c, miR-221-5p, miR-200c-3p, miR-221-5p, miR-199a-5p, miR-769, miR-139-5p, miR-582-5p, miR-3154, miR-129b-3p, miR-450a-1-3p, miR-582-5p, miR-1827, miR-1248, miR-2312, miR-145a-3p, miR-3184-5p, miR-769-5p, miR-331-3p, miR-2285j, miR-28-5p, miR-486b-3p, miR-31-3p, miR-708-5p, miR-450b-3p, miR-409b, miR-2355-3p, miR-411-5p, miR-149-5p, miR-455-3p, miR-30b-3p, miR-450c-3p, miR-1434-3p, miR-101c, miR-219a-1-3p, miR-30b-3p, miR-493-5p, miR-432-3p, miR-432-3p, miR-2411-3p, novel\_115, miR-199b-5p, miR-3955-3p, miR-139-5p, miR-199b-5p, miR-1983, miR-9-3p, miR-493-5p, miR-412-3p, miR-495-3p, miR-452-5p, miR-2285f, novel\_120, miR-199b-5p, miR-2428, miR-423-5p, novel\_87, miR-769-5p, miR-421-5p, miR-3968 miR-1434-5p, miR-2284ab, miR-5010-3p, miR-149-5p, miR-224-5p, miR-28-3p, miR-382-3p, miR-664b-3p, miR-2478, miR-2285r, miR-487b-5p, miR-129b-3p, miR-668-5p, miR-96-5p, miR-135b-5p, miR-582-5p, miR-186-5p, miR-7144-5p, miR-548o-

DSCC1 ENSOARGO(DNA repl 3p, miR-545-3p, miR-139-5p, miR-211-5p, miR-216b-3p, miR-139-5p, miR-489, miR-582-5p, miR-144-3p, miR-494-5p, miR-34c-3p, novel\_63, miR-135a-5p, miR-144, miR-335, miR-487b-5p, miR-204-5p, miR-208b-5p, miR-335-5p, miR-28a-3p, miR-3607-3p, miR-1271, miR-224-5p, miR-211, miR-10b-3p miR-204-5p, miR-200a-3p, miR-452-5p, miR-145a-3p, miR-4454, novel\_39, miR-200a, novel\_111, miR-877-3p, miR-211, miR-2904, miR-484, miR-1248, let-7g-3p, miR-141-3p, miR-211-5p, miR-7977, miR-1343-3p, miR-4443, miR-25, miR-2404

PGGT1B ENSOARGO(protein 3p, miR-545-3p, miR-139-5p, miR-211-5p, miR-216b-3p, miR-139-5p, miR-489, miR-582-5p, miR-144-3p, miR-494-5p, miR-34c-3p, novel\_63, miR-135a-5p, miR-144, miR-335, miR-487b-5p, miR-204-5p, miR-208b-5p, miR-335-5p, miR-28a-3p, miR-3607-3p, miR-1271, miR-224-5p, miR-211, miR-10b-3p miR-204-5p, miR-200a-3p, miR-452-5p, miR-145a-3p, miR-4454, novel\_39, miR-200a, novel\_111, miR-877-3p, miR-211, miR-2904, miR-484, miR-1248, let-7g-3p, miR-141-3p, miR-211-5p, miR-7977, miR-1343-3p, miR-4443, miR-25, miR-2404

KEAP1 ENSOARGO(kelch-li 3p, miR-545-3p, miR-139-5p, miR-211-5p, miR-216b-3p, miR-139-5p, miR-489, miR-582-5p, miR-144-3p, miR-494-5p, miR-34c-3p, novel\_63, miR-135a-5p, miR-144, miR-335, miR-487b-5p, miR-204-5p, miR-208b-5p, miR-335-5p, miR-28a-3p, miR-3607-3p, miR-1271, miR-224-5p, miR-211, miR-10b-3p miR-204-5p, miR-200a-3p, miR-452-5p, miR-145a-3p, miR-4454, novel\_39, miR-200a, novel\_111, miR-877-3p, miR-211, miR-2904, miR-484, miR-1248, let-7g-3p, miR-141-3p, miR-211-5p, miR-7977, miR-1343-3p, miR-4443, miR-25, miR-2404

LYSDM3 ENSOARGO(LysM, pu miR-105-5p, miR-3955-3p, miR-660, miR-134-5p, miR-200a-3p, miR-135a-2-3p, miR-590-3p, miR-145a-3p, miR-200a, miR-1290, miR-134, miR-197-3p, miR-411, miR-378b, miR-10b-3p, miR-105-2, miR-545-3p, miR-660-5p, miR-105-1, miR-452-3p, miR-141-3p, miR-134-5p  
 miR-378h, miR-134-5p, miR-493-3p, miR-16-1-3p, let-7a-2-3p, miR-378i, miR-134, miR-2904, miR-378a-3p, miR-330-5p, miR-140-3p, miR-5703, miR-217-5p, miR-377-5p, miR-125b-2-3p, miR-2284y, miR-2284a, miR-183-5p, miR-3529-3p, miR-4286, miR-191-3p, miR-760-3p, miR-221-5p, miR-21-3p, novel\_96, miR-217, miR-422a, miR-139-5p, miR-6130, miR-221-5p, miR-545-3p, miR-378a-3p, let-7g-3p, miR-1895, miR-21a-3p, miR-224-5p, miR-378c, miR-6134, miR-378c, miR-145a-3p, miR-4510, miR-3184-3p, miR-134-5p, miR-100-3p, miR-149-5p, miR-194-3p, miR-1185-3p, miR-1343-3p, miR-377-5p, miR-378c, miR-16-1-3p, miR-2426, miR-378b, miR-541, miR-1843b-5p, miR-378d, miR-193a, let-7a-2-3p, miR-382-3p, let-7c-3p, miR-2284b, miR-491-5p, miR-224-5p, miR-342, miR-5126, miR-326, miR-378e, miR-1185-2-3p, miR-4443, miR-139-5p, miR-2284g, miR-20a-3p, miR-7975, miR-9-3p, miR-378f, miR-877-3p, miR-3970, miR-326-3p, miR-342-3p, miR-541-3p, miR-3958-3p, miR-628-3p, miR-3968  
 miR-181b-2-3p, miR-455-3p, miR-9788-3p, miR-148b-5p, miR-496-5p, miR-30b-3p, miR-329-3p, miR-2284r, miR-541, miR-3120-5p, miR-362-3p, miR-544a, miR-450b-5p, miR-376b, miR-1388-3p, miR-2330-5p, miR-382-3p, miR-494-3p, miR-8485, miR-362-3p, novel\_19, novel\_103, miR-5126, miR-214-3p, miR-139-5p, miR-203-3p, miR-361-3p, miR-96-5p, miR-3059-5p, miR-541-3p, miR-423-5p, miR-219a-2-3p, miR-361-3p, miR-1973, miR-2285t, miR-490-5p, miR-2284q, miR-3968, novel\_83, miR-2904, miR-5703, miR-1193, miR-188-3p, miR-362-3p, miR-2300b-3p, miR-2366, miR-148a-5p, miR-181b-1-3p, miR-324-3p, miR-92a-1-5p, miR-185-3p, miR-210-5p, miR-21-3p, miR-296-3p, miR-582-5p, miR-323-5p, miR-139-5p, miR-433-3p, miR-625-5p, miR-582-5p, miR-1827, novel\_99, miR-1271, miR-425-5p, miR-665-5p, miR-214, miR-3074-5p, miR-3184-5p, miR-224-5p, miR-219b-3p, miR-665, miR-4492, miR-874-5p, miR-487a-5p, miR-664a, miR-26b-3p, miR-103a-3p, miR-133b-5p, miR-544b, miR-103, miR-185-5p, miR-2113, miR-4508, miR-744-5p, miR-30b-3p, miR-628-5p, let-7j, miR-432-3p, miR-365b-5p, novel\_51, miR-224-5p, miR-452-5p, miR-378a-5p, miR-320b, miR-3074-5p, miR-677, miR-181b-3p, miR-323a-5p, miR-374c-3p, miR-3970, miR-2387, miR-1291, miR-107, miR-4324, miR-502-5p, miR-1247-3p, miR-22-5p, miR-423-3p, miR-218-2-3p, miR-2385-3p, miR-4286, miR-181a-2-3p, miR-3529-3p, miR-200a, miR-219-3p, miR-2397-5p, miR-107, miR-191-3p, miR-2285aa, miR-615-5p, miR-1271, miR-374c-3p, miR-7144-5p, miR-485-5p, miR-1248, miR-329a, miR-193a-5p, miR-1306-5p, miR-181a-2-3p, miR-365a-5p, miR-2903, miR-331-3p, miR-2433, miR-592

NBAS ENSOARGO(neurobla

DEPTOR ENSOARGO(DEP doma

miR-23b-3p, miR-7859, miR-23c, miR-148b-3p, novel\_83, miR-199a-3p, miR-1b-3p, miR-505-3p, novel\_73, miR-4429, miR-133a-3p, miR-5703, miR-188-3p, miR-29b-1-5p, miR-181b-1-3p, miR-486-3p, miR-216c-5p, miR-2285w, miR-369-3p, miR-2284m, miR-320d, miR-221-5p, miR-3653-3p, miR-21-3p, miR-345-3p, miR-301a-3p, miR-132-5p, miR-377-3p, novel\_25, miR-221-5p, miR-545-3p, miR-345-5p, miR-543-3p, miR-186-5p, miR-411, miR-6525, miR-206-3p, miR-181c-5p, miR-3184-3p, miR-2330-3p, miR-6516-3p, miR-664a, miR-487a-5p, miR-454-3p, miR-539-5p, miR-216a-3p, miR-9788-3p, miR-330-3p, miR-181b-2-3p, miR-1388-5p, miR-2284aa, miR-1a-3p, miR-30b-3p, miR-23a-3p, miR-376b, miR-3085-3p, miR-3955-3p, miR-130b-3p, miR-103a-2-5p, miR-320b, miR-199a-3p, miR-326, miR-29b-1-5p, miR-3064-5p, miR-541-5p, miR-499b-5p, miR-2285u, miR-136-5p, miR-9-3p, miR-378j, novel\_111, miR-8095, miR-2284j, miR-181d-5p, miR-452-5p, novel\_82, miR-2285n, miR-2285y, miR-107-5p, miR-2284z, miR-134-5p, miR-2285ad, miR-411-3p, miR-345-3p, miR-134, miR-1343-5p, miR-330-5p, miR-28b, novel\_39, miR-3064-5p, miR-1, miR-181b-5p, miR-152-3p, miR-2285af, miR-365a-3p, miR-574-5p, miR-2355-5p, miR-345-5p, novel\_48, miR-376c-5p, miR-485-5p, miR-1248, miR-376c-5p, miR-320a, miR-23b, miR-3154, miR-323-3p, let-7e-3p, miR-2284v, miR-138-5p, miR-134-5p, miR-486b-3p, miR-410-5p, miR-2284k, miR-2284d, miR-432-5p, miR-194-3p, miR-665, miR-138, miR-30b-3p, miR-2284ab, miR-432, miR-223-3p, miR-181a-5p, miR-432-3p, miR-432-3p, miR-2284l, miR-345-5p, miR-6240, miR-1343-5p, miR-466f-3p, miR-377-3p, miR-330-3p, miR-2411-3p, miR-320c, miR-677, miR-6535, miR-181b-3p, miR-655-5p, miR-6516-3p, miR-505-3p, miR-376b-5p, miR-148a-3p, miR-3065-5p, miR-3959-3p, miR-326-3p, miR-2428, miR-301b-3p, miR-379-3p, miR-206, miR-147-5p, miR-28c, miR-212-5p, miR-1b-3p, miR-2285ad, miR-299a-3p, miR-214-5p, miR-2284h-5p, miR-532-3p, miR-582-3p, miR-758-5p, miR-24-2-5p, miR-9-5p, miR-330-5p, miR-501-3p, miR-124-3p, miR-4286, miR-29b-2-5p, miR-195a-3p, miR-2285w, miR-216c-5p, miR-199a-5p, miR-486-3p, miR-376a-5p, miR-24-2-5p, miR-29b-1-5p, miR-3071-3p, novel\_17, miR-210-5p, miR-1260a, miR-299-3p, miR-181b-5p, miR-466i-5p, miR-2285aa, miR-2331-3p, miR-140-5p, miR-504-5p, miR-574-5p, miR-199a-5p, miR-544-3p, miR-377-3p, miR-2284s, miR-3154, miR-1827, miR-186-5p, miR-7144-5p, miR-345-5p, miR-345-5p, miR-214, miR-181c-5p, miR-122-5p, miR-1260b, miR-29b-2-5p, miR-486b-3p, miR-129-5p, miR-26b-3p, miR-199b-3p, miR-133b-5p, miR-544b, novel\_116, miR-147a, miR-134-3p, miR-153, miR-432-5p, miR-501-3p, miR-7857, miR-181a-5p, miR-432, miR-484, miR-2284r, miR-296-5p, miR-26a-2-3p, miR-544a, miR-1260b, miR-652-5p, miR-382-3p, miR-124a, miR-345-5p, miR-29b-1-5p, miR-326, miR-377-3p, miR-342, miR-214-3p, miR-199b-5p, miR-153-3p, miR-7977, miR-24-1-5p, miR-500-3p, miR-2483-3p, miR-299b-3p, miR-670-3p, miR-378g, miR-199b-5p, miR-361-3p, miR-504, miR-1291, miR-181d-5p, miR-9-5p, miR-1296-5p, miR-3956-3p, miR-342-3p, novel\_60, miR-199b-5p, miR-326-3p, miR-502-3p, miR-371b-3p, miR-24-3p, miR-361-3p, miR-6402, miR-4324, miR-199c, miR-6119-3p, miR-4726-5p

miR-2319b, miR-2284g, miR-3065-5p, miR-2284e, miR-212-3p, miR-3956-3p, miR-2447, novel\_60, miR-2284j, miR-142b, miR-1973, miR-2284o, miR-142-5p, miR-185-5p, miR-153, miR-1434-3p, miR-3071-5p, miR-219a-1-3p, miR-138, miR-2284aa, miR-2284b, miR-101-5p, miR-182-5p, miR-136-3p, miR-153-3p, miR-660, miR-660-5p, miR-182-5p, miR-141-3p, miR-6516, miR-300-3p, miR-2284n, miR-204-3p, miR-488-3p, miR-3074-2-3p, miR-3607-3p, miR-142a-5p, miR-30e-3p, miR-2285j, miR-3604, miR-338-5p, miR-30a-3p, miR-138-5p, miR-429-3p, miR-30d-3p, miR-6516-5p, miR-222-5p, miR-7859, miR-545-5p, miR-2284z, miR-217-5p, miR-142-3p, miR-582-3p, miR-2284u, miR-218-1-3p, miR-3529-3p, miR-2284f, miR-181a-2-3p, miR-30a-3p, miR-2284a, miR-200a, miR-2284y, miR-210-5p, miR-217, miR-216a-5p, miR-1a-2-5p, miR-127-5p, miR-200c-3p, miR-2284m, miR-200a-3p, miR-214-5p, miR-545-5p, miR-2411-5p, miR-29d-3p, miR-134, miR-345-3p, let-7d, miR-30a-3p, miR-3529-3p, miR-490-3p, miR-1271-3p, miR-2284a, miR-217, let-7c-5p, miR-30c-2-3p, miR-6119-5p, miR-200c, miR-376b-3p, miR-200c-3p, miR-450a-2-3p, miR-2898, miR-17-3p, miR-141-3p, miR-2284n, miR-769, miR-374c-3p, miR-3154, miR-320a, miR-503-3p, miR-488-3p, miR-671-5p, miR-7144-5p, miR-3074-1-3p, miR-6128, miR-3969, miR-409-3p, miR-144, miR-1306-3p, miR-135a-1-3p, miR-29b-3p, miR-31-3p, miR-767-5p, miR-138-5p, let-7g-5p, miR-2284d, miR-3071-5p, miR-374b-3p, miR-194-5p, miR-145a-5p, miR-1285, miR-653, miR-455-5p, miR-7862, miR-138, miR-29b, miR-2284ab, miR-363-5p, miR-130b-5p, miR-345-5p, miR-455-5p, miR-125a-5p, miR-452-5p, miR-1343-5p, miR-660, miR-29a-3p, miR-670-3p, miR-323a-5p, miR-18a-3p, miR-376b-3p, miR-195a-5p, miR-505-3p, miR-6516-3p, miR-9851-3p, miR-542-5p, novel\_101, miR-17-3p, miR-495-3p, miR-2285x, miR-3957-3p, novel\_120, miR-342-3p, miR-219b-3p, miR-2428, miR-326-3p, miR-3959-3p, let-7i, miR-382-5p, miR-16a, miR-15a, miR-22-5p, miR-656-5p, miR-505-3p, miR-3600, miR-222-5p, miR-15a-5p, miR-140-3p, miR-5703, miR-2904, miR-124-3p, miR-4429, miR-2411, miR-125b-2-3p, miR-125b, miR-542-5p, miR-196a-3p, miR-299-3p, miR-221-5p, miR-760-3p, miR-2284m, miR-320d, miR-182-5p, miR-32-3p, miR-660-5p, miR-221-5p, miR-155-5p, miR-22-3p, novel\_32, miR-204-3p, miR-323-5p, miR-21a-3p, novel\_99, let-7b-5p, miR-320e, miR-19b-1-5p, miR-208b-5p, miR-424-5p, miR-6516-3p, miR-155-5p, miR-17-3p, miR-450b-3p, miR-27a-3p, miR-222-5p, miR-412-3p, miR-6529a, miR-484, miR-3120-5p, miR-2284aa, miR-2426, miR-33a-5p, miR-424-5p, miR-2330-5p, let-7a-5p, miR-758-3p, miR-193a, miR-30c-1-3p, miR-2957, miR-326, miR-342, miR-320b, miR-542-5p, let-7a, miR-3955-3p, miR-95-5p, miR-20a-3p, miR-376d, miR-27a-

FEM1C ENSOARGO(fem-1 ho)

ASNSD1 ENSOARGO(asparagi)

miR-30c-1-3p, miR-758-3p, miR-3187-3p, miR-395b-3p, miR-308b-3p, novel\_103, miR-1306-5p, miR-320b, miR-2957, miR-216a-3p, miR-500-5p, miR-105-1, novel\_4, miR-450b-5p, miR-101a-5p, miR-378c, miR-2284aa, miR-378b, miR-484, miR-412-3p, miR-362-5p, miR-8095, miR-502-3p, miR-4454, miR-32-3p, miR-452-5p, miR-4726-5p, miR-2285t, miR-2285n, miR-107-5p, miR-2285y, miR-378e, miR-664b, miR-3064-5p, miR-541-5p, miR-199b-5p, miR-125b-2-3p, miR-2432, miR-216c-5p, miR-466i-5p, miR-320d, miR-2284m, miR-299-3p, miR-221-5p, miR-34b-5p, miR-30b-3p, miR-1277-5p, miR-125b, miR-185-3p, miR-216a-5p, miR-200b, miR-340-5p, miR-532-3p, miR-4429, miR-2300b-3p, miR-188-3p, miR-1197-5p, miR-5703, miR-1193, miR-145a-3p, miR-378c, miR-539-5p, miR-1271, miR-450b-3p, miR-29b-2-5p, miR-320e, miR-324-3p, miR-132-5p, miR-27a-5p, miR-6516, miR-204-3p, miR-32-3p, miR-221-5p, miR-378a-3p, miR-532-5p, miR-182-5p, miR-370-5p, miR-27b-5p, miR-345-5p, miR-130b-5p, miR-2285l, miR-125a-5p, miR-224-5p, miR-455-5p, miR-330-3p, miR-2284d, miR-377-5p, miR-21-5p, miR-380-3p, miR-2284ab, miR-7862, miR-2889, miR-455-5p, miR-1434-3p, miR-1285, miR-3071-5p, miR-371b-3p, miR-24-3p, miR-449a, novel\_27, miR-495-3p, novel\_101, miR-1193, novel\_1, miR-147-5p, miR-33a-3p, miR-34c, miR-34b, miR-670-3p, miR-2404, miR-320b, miR-2285k, miR-135b-5p, miR-6516-3p, miR-18a-3p, miR-21c, miR-199a-5p, miR-3529-3p, miR-181a-2-3p, miR-29b-2-5p, miR-30a-3p, miR-191-3p, miR-200c-3p, miR-2898, miR-200c, miR-2285af, miR-339a, miR-30c-2-3p, miR-1271-5p, miR-6516-5p, miR-378h, miR-302a-5p, miR-545-5p, miR-300, miR-411-3p, miR-200b-3p, miR-105-2, miR-134, miR-345-3p, miR-501-3p, miR-218-2-3p, miR-500b-5p, miR-365a-5p, miR-378c, miR-103b, miR-6128, miR-31-3p, miR-370-5p, miR-135a-5p, miR-26c, miR-3965, miR-34c-5p, miR-2284n, miR-199a-5p, miR-141-3p, miR-10b-3p, miR-671-5p, miR-



miR-652b, miR-3184-5p, miR-3074-5p, miR-129-2-3p, miR-214, miR-500, miR-454-3p, miR-30e-3p, miR-664a-5p, miR-30a-3p, miR-301a-3p, miR-10a, miR-377-3p, miR-15b-5p, miR-548o-3p, miR-2331-3p, miR-30c-1-3p, miR-216b-3p, miR-339b, miR-1827, miR-885-3p, miR-543-3p, miR-299, miR-30d-5p, miR-129b-3p, miR-500a-3p, miR-181b-1-3p, miR-377-5p, miR-380-3p, miR-486-3p, miR-2285w, miR-345-3p, miR-202-5p, miR-210-5p, miR-7859, miR-328-3p, miR-1247-5p, miR-2284h-5p, miR-106a, miR-18a-3p, miR-30d-3p, miR-2284u, miR-148a-5p, miR-218-1-3p, miR-664-5p, miR-361-3p, miR-877-3p, miR-423-5p, miR-2447, miR-615, miR-101-3p, miR-378g, miR-3596, miR-2319b, miR-139-5p, miR-2284g, miR-140-5p, miR-8485, miR-101b-3p, miR-127-3p, miR-130b-3p, miR-491-5p, miR-214-3p, miR-199b-5p, miR-16b, miR-106b-5p, miR-29b-1-5p, miR-496-5p, miR-148b-5p, miR-455-3p, miR-330-3p, miR-1343-3p, miR-548w, miR-181b-2-3p, miR-145b, miR-362-3p, miR-329-3p, miR-1197-3p, miR-16-5p, miR-592, miR-542-5p, miR-2285aa, miR-329a, miR-20b-5p, miR-301, miR-30e-5p, miR-93-5p, novel\_39, miR-2284y, miR-29a-5p, novel\_96, novel\_127, miR-152-3p, miR-205-5p, miR-322-5p, miR-129-1-3p, miR-429-3p, miR-6517, miR-299a-3p, miR-2285ad, novel\_79, miR-412, miR-885-3p, miR-330-5p, miR-23b-5p, miR-1343-5p, miR-2284w, miR-301b-3p, miR-199b-5p, miR-29c-3p, miR-29a, miR-28c, miR-1247-3p, novel\_87, novel\_69, miR-299b-3p, miR-181b-3p, miR-677, miR-3074-5p, novel\_68, miR-148a-3p, miR-3065-5p, miR-1306, miR-150-5p, let-7j, miR-6240, miR-668-3p, miR-378a-5p, miR-377-3p, miR-7-5p, novel\_51, miR-134-3p, miR-412-5p, miR-149-5p, miR-339-5p, miR-16b, miR-26a-2-3p, miR-497-5p, miR-223-3p, miR-1843b-5p, miR-7b-5p, miR-2113, miR-432, miR-19b-2-5p, miR-29c-5p, miR-10b-5p, miR-145a-3p, miR-4510, miR-664a, miR-487a-5p, miR-124-5p, miR-29b-2-5p, miR-19b-1-5p, miR-29d-5p, miR-3184-5p, miR-423-5p, miR-3064-5p, miR-3085-3p, novel\_124, miR-152-3p, miR-431-5p, miR-331-3p, miR-148b-3p, miR-3064-5p, miR-431, miR-2355-5p, miR-885-3p, miR-744-5p, miR-885-3p, miR-148a-3p, miR-361-3p, miR-1b-5p, miR-193a, let-7j, miR-652-5p, miR-2285o, miR-146b, miR-130b-3p, miR-2285l, miR-2411-3p, miR-505, miR-146a, miR-199a-3p, miR-500-5p, miR-130a-3p, miR-199b-3p, novel\_4, miR-26a-2-3p, miR-3071-5p, miR-301b-3p, miR-362-5p, novel\_120, miR-199c, miR-4726-5p, novel\_87, miR-677, miR-7857-3p, miR-3120-3p, miR-26b-5p, miR-20a-3p, miR-3074-5p, miR-379-5p, miR-146b-5p, miR-3065-5p, miR-3591-3p, miR-148a-3p, miR-143-3p, miR-200a, miR-2411, miR-146a-5p, miR-200a-3p, miR-152-3p, miR-127-5p, miR-6536, miR-345-3p, miR-217, miR-26a-5p, miR-205-5p, miR-196a-3p, miR-199a-3p, miR-148b-3p, miR-2411-5p, miR-7859, miR-218-1-3p, miR-133a-3p, miR-217-5p, miR-345-3p, miR-3607-3p, miR-3074-5p, miR-539-5p, miR-454-3p, miR-129-5p, miR-487b-5p, miR-2285j, novel\_63, miR-877-5p, novel\_25, miR-216b-5p, miR-301a-3p, miR-141-3p, miR-21-3p, miR-545-3p, miR-186-5p, miR-1248, miR-362-5p, miR-3154, miR-21a-3p

|        |                   |                                                                                                                                                                                                                                                                                                                                                                                                                                                                                                                                                                                                                                                                                                                                                                                                                                                                                                                                                                                                                                                           |
|--------|-------------------|-----------------------------------------------------------------------------------------------------------------------------------------------------------------------------------------------------------------------------------------------------------------------------------------------------------------------------------------------------------------------------------------------------------------------------------------------------------------------------------------------------------------------------------------------------------------------------------------------------------------------------------------------------------------------------------------------------------------------------------------------------------------------------------------------------------------------------------------------------------------------------------------------------------------------------------------------------------------------------------------------------------------------------------------------------------|
| CD01   | ENSOARGO(cysteine | miR-6740-5p, miR-2284k, miR-20a-5p, miR-2284j, miR-145a-3p, miR-3184-3p, miR-2284v, miR-93, miR-137-3p, miR-93-5p, miR-17-5p, miR-18a-3p, miR-129b-5p, miR-7975, miR-20b-5p, miR-10b-3p, miR-876-3p, miR-532-5p, miR-140-5p, miR-2284g, miR-223-5p, miR-2284n, miR-106a-5p, miR-106b-5p, miR-17-5p, miR-205-5p, novel_127, miR-106a, miR-2284m, miR-20a, miR-106a-5p, miR-2284y, miR-1957a, miR-218-2-3p, miR-1197-5p, novel_23, miR-2284u, miR-142-3p, miR-33b-3p, miR-1b-3p, miR-18a-3p, miR-106a, miR-148b-5p, miR-20b, miR-2284d, miR-302a-5p, miR-33a-5p, miR-345-3p, miR-363-5p, miR-486-3p, miR-324-3p, miR-200c, miR-224-5p, miR-200a-3p, miR-107, miR-200c-3p, miR-2898, novel_78, miR-103a-3p, miR-429-3p, miR-340-                                                                                                                                                                                                                                                                                                                             |
| ACACB  | ENSOARGO(acetyl-C | 3p, miR-103, miR-3431, miR-200b, miR-7134-5p, miR-200b-3p, miR-224-5p, miR-486b-3p, miR-3964, miR-656-5p, miR-664a, novel_1, miR-141-3p, novel_107, miR-4443, novel_32, miR-378b, miR-361-3p, miR-485-5p, miR-671-5p, miR-107, novel_1, miR-6119-3p, miR-199c, miR-421-5p, miR-374a-3p, miR-3964, miR-656-5p, miR-142b, miR-6402, miR-199b-5p, miR-219a-2-3p, novel_27, miR-194b-5p, miR-452-5p, miR-495-3p, miR-505-3p, miR-146b-5p, miR-199b-5p, miR-27a-3p, miR-26b-5p, miR-320b, miR-214-3p, miR-199b-5p, miR-146b, miR-146a, miR-194a, miR-362-3p, miR-503-3p, miR-193a, miR-23a-3p, miR-101a-5p, miR-362-3p, miR-27b-3p, miR-329-3p, miR-194-5p, miR-374b-3p, miR-125b-2-3p, miR-2320-3p, miR-142-5p, novel_4, miR-199b-                                                                                                                                                                                                                                                                                                                            |
| ATG12  | ENSOARGO(autophag | 3p, miR-27a-3p, novel_74, miR-374b-3p, miR-592, miR-2284k, miR-15b-3p, miR-219b-3p, miR-324-3p, miR-100-3p, miR-374a-3p, miR-142a-5p, miR-145-3p, miR-3184-3p, miR-145a-3p, miR-214, miR-329a, miR-186-5p, novel_48, miR-625-5p, miR-21a-3p, miR-129b-3p, miR-199a-5p, miR-221-5p, miR-221-5p, miR-26a-5p, miR-6119-5p, miR-219-3p, miR-421-5p, miR-2424, miR-199a-5p, miR-146a-5p, miR-216c-5p, miR-345-3p, miR-218-1-3p, miR-2366, miR-362-3p, miR-140-3p, miR-23c, miR-222-5p, miR-302a-5p, miR-7859, miR-23b-3p, miR-548e-3p, miR-505-3p, miR-212-5p, let-7e-5p, miR-877-3p, miR-9851-3p, miR-1291, miR-361-3p, let-7d-5p, novel_69, miR-378g, miR-320b, miR-3074-5p, let-7i, miR-615, novel_82, miR-326-3p, miR-361-3p, miR-17-3p, miR-541-3p, miR-4454, miR-3120-5p, miR-2889, miR-101a-5p, miR-30b-3p, miR-138, miR-30b-3p, miR-22-3p, miR-541, miR-134-3p, let-7g-5p, miR-409b, miR-340-3p, let-7e, miR-125a-5p, miR-483-3p, miR-124-5p, novel_51, novel_19, miR-326, miR-491-3p, let-7a-5p, miR-485-5p, miR-1895, let-7i-5p, miR-22-3p, miR-300- |
| EME2   | ENSOARGO(essentia | 3p, miR-125a, miR-552-3p, miR-370-3p, miR-140-5p, miR-221-5p, miR-2331-3p, miR-4492, miR-874-5p, miR-17-3p, novel_9, miR-138-5p, miR-320e, miR-29b-2-5p, miR-125b-5p, novel_63, let-7f, miR-6134, let-7b-5p, miR-129-2-3p, miR-3074-5p, let-7b, let-7d, miR-330-5p, miR-1197-5p, miR-1961, miR-615-3p, miR-129-1-3p, miR-214-5p, miR-23c, miR-483-3p, miR-543-5p, let-7k, miR-221-5p, miR-98-5p, let-7f-5p, miR-17-3p, miR-125b, miR-185-3p, let-7c-5p, miR-219b-5p, miR-324-3p, let-7g, miR-29b-2-5p                                                                                                                                                                                                                                                                                                                                                                                                                                                                                                                                                     |
| COL5A2 | ENSOARGO(collagen | miR-677, miR-323-5p, miR-323a-5p, miR-885-5p, miR-212-3p, miR-1388-3p, miR-7862, let-7f-1-3p                                                                                                                                                                                                                                                                                                                                                                                                                                                                                                                                                                                                                                                                                                                                                                                                                                                                                                                                                              |

|        |                      |                                                                                                                                                                                                                                                                                                                                                                                                                                                                                                                                                                                                                                                                                                                                                                                                                          |
|--------|----------------------|--------------------------------------------------------------------------------------------------------------------------------------------------------------------------------------------------------------------------------------------------------------------------------------------------------------------------------------------------------------------------------------------------------------------------------------------------------------------------------------------------------------------------------------------------------------------------------------------------------------------------------------------------------------------------------------------------------------------------------------------------------------------------------------------------------------------------|
|        |                      | miR-487a-3p, miR-2331-3p, miR-320c, miR-362-5p, miR-320a, miR-299, miR-221, miR-544-5p, novel_94, miR-154b-3p, miR-2318, miR-103b, miR-9-5p, miR-885-5p, miR-6134, miR-362-5p, novel_111, miR-1197-3p, miR-222-3p, miR-669a-3p, miR-6516-3p, miR-222, miR-548e-3p, miR-429-3p, miR-6238, miR-2284h-5p, miR-500-5p, miR-221-3p, miR-545-5p, miR-7859, miR-487a-3p, miR-9-5p, miR-1434-5p, miR-16-2-3p, miR-4429, miR-2426, miR-2285w, miR-487a, miR-29a-5p, miR-539-3p, miR-432-3p, miR-432-3p, miR-320b, miR-2397-5p, miR-200c, miR-320d, miR-200c-3p                                                                                                                                                                                                                                                                    |
| RBM11  | ENSOARGO(C RNA bind  | miR-26a-2-3p, miR-300, miR-1434-5p, miR-23b-5p, miR-217-5p, miR-653, miR-432, miR-1434-3p, miR-181a-5p, miR-143-5p, novel_121, miR-432-5p, miR-7859, miR-147a, miR-148b-3p, miR-7641, miR-3955-5p, miR-548e-3p, miR-103a-2-5p, miR-543-5p, miR-152-3p, miR-466i-5p, miR-181b-5p, miR-182-5p, miR-217, miR-30b, miR-664-3p, miR-2432, miR-143-3p, miR-33a-5p, miR-6516-3p, miR-582-5p, miR-1248, miR-30f, miR-381-3p, miR-381-3p, miR-148a-3p, miR-677, miR-582-5p, miR-139-5p, miR-2483-3p, miR-182-5p, miR-139-5p, miR-664b, miR-20a-3p, miR-3964, novel_74, miR-107-5p, miR-409-3p, novel_82, miR-30b-5p, miR-34c-3p, miR-181c-5p, miR-181d-5p, miR-3059-5p, novel_60, miR-539-5p, miR-3956-3p                                                                                                                         |
| LIPI   | ENSOARGO(C lipase, l | let-7g, miR-1271-3p, miR-105-3p, miR-221-5p, miR-299-3p, let-7k, let-7f-5p, miR-191-3p, miR-98-5p, miR-30c-2-3p, miR-92a-1-5p, let-7c-5p, miR-151-5p, miR-532-3p, miR-483-3p, miR-431, miR-299a-3p, miR-184-3p, let-7d, miR-5703, miR-188-3p, novel_133, miR-196a-5p, miR-1961, let-7b-5p, miR-6134, miR-3958-5p, let-7b, let-7f, miR-2433, miR-151b, let-7i-5p, miR-323-5p, miR-296-3p, miR-221-5p, miR-30c-1-3p, miR-874-3p, miR-485-5p, miR-876-3p, miR-129b-3p, miR-30c-1-3p, miR-628-5p, let-7a-5p, miR-2330-5p, let-7e, miR-483-3p, miR-196b-5p, miR-455-5p, miR-431-5p, miR-2355-3p, let-7g-5p, miR-147a, miR-1343-3p, miR-455-5p, miR-3962, miR-541, miR-542-3p, novel_60, miR-541-3p, miR-3956-3p, let-7i, miR-669, let-7d-5p, miR-4443, miR-323a-5p, miR-299b-3p, miR-411b-3p, miR-320b, let-7e-5p, miR-410-5p |
| EGR1   | ENSOARGO(C early gr  | miR-29d-3p, miR-196a-5p, miR-1961, miR-16-2-3p, miR-29b, miR-411-3p, let-7d, miR-142-3p, miR-2426, miR-5010-3p, miR-148b-5p, miR-616-3p, let-7g-5p, miR-365b-5p, let-7c-5p, miR-664-3p, let-7k, let-7e, miR-3085-3p, miR-196b-5p, miR-98-5p, miR-127-5p, let-7f-5p, miR-195a-3p, miR-3064-5p, let-7a-5p, miR-193a, let-7g, miR-664b-3p, miR-378b, novel_99, miR-135b-5p, let-7e-5p, miR-767, miR-574-5p, miR-664b, miR-3064-5p, miR-548o-3p, let-7d-5p, let-7i-5p, miR-29a-3p, let-7i, miR-3604, miR-135a-5p, miR-29b-3p, let-7f, miR-2285j, miR-6402, novel_74, miR-767-5p, miR-29a, novel_1, miR-379-3p, miR-29c-3p, miR-3074-2-3p, miR-452-5p, novel_120, let-7b, miR-365a-5p, miR-122-5p, let-7b-5p                                                                                                                  |
| COL3A1 | ENSOARGO(C collagen  |                                                                                                                                                                                                                                                                                                                                                                                                                                                                                                                                                                                                                                                                                                                                                                                                                          |

miR-27b-5p, miR-411, miR-23b, let-7g-3p, miR-329b, miR-548o-3p, miR-125a, miR-552-3p, miR-215-5p, miR-499b-3p, novel\_25, let-7i-5p, let-7f, miR-34c-3p, miR-125b-5p, miR-665, miR-451a, let-7b, miR-145a-3p, miR-181c-3p, miR-3184-5p, let-7b-5p, miR-365a-5p, miR-345-3p, miR-1961, miR-215-5p, miR-188-3p, miR-411-3p, let-7d, miR-548e-3p, miR-7859, miR-23b-3p, miR-222-5p, miR-23c, miR-6119-5p, miR-125a-3p, miR-3071-3p, let-7c-5p, miR-125b, miR-345-3p, miR-2284m, let-7f-5p, miR-98-5p, let-7k, miR-329a-5p, miR-216c-5p, let-7g, miR-143-3p, miR-3141, miR-181a-3p, miR-493-5p, let-7e-5p, miR-452-3p, miR-329-5p, miR-2285u, miR-7857-3p, miR-499a-3p, miR-3596, miR-489, let-7d-5p, miR-1185-2-3p, miR-2285n, let-7i, miR-382-5p, miR-379-3p, miR-199c, miR-212-3p, miR-2284j, miR-423-5p, miR-7857, novel\_23, miR-758-3p, miR-21-5p, miR-1839-5p, miR-7862, miR-2284x, miR-199b-3p, miR-1343-3p, miR-222-5p, miR-2284d, let-7g-5p, miR-411-5p, miR-455-3p, miR-1185-3p, miR-365b-5p, miR-3141, miR-2957, miR-2411-3p, miR-125a-5p, let-7e, let-7a-5p, miR-493-5p, miR-23a-3p, let-7f-2-3p, let-7f-2-3p, miR-2284l, miR-758-3p, miR-7977, miR-3064-5p, miR-6535, miR-378g, miR-323a-5p, miR-34b, miR-1306, miR-3591-3p, miR-216a-3p, miR-18a-3p, miR-361-3p, miR-6395, miR-1291, miR-107, miR-504, novel\_101, miR-342-3p, miR-449a, miR-361-3p, miR-371a-5p, miR-34c, miR-339-5p, miR-31-5p, miR-3955-5p, novel\_4, miR-103a-3p, novel\_116, miR-103, miR-134-3p, miR-185-5p, miR-147a, miR-22-3p, miR-30b-3p, miR-3071-5p, miR-296-5p, miR-744-5p, miR-30b-3p, miR-138, miR-1260b, miR-363-5p, miR-574-3p, miR-4532, miR-8485, miR-432-3p, miR-432-3p, miR-29b-1-5p, novel\_51, miR-342, miR-1306-5p, miR-1343-5p, miR-3085-3p, miR-21-3p, miR-552-3p, miR-2331-3p, miR-221-5p, miR-504-5p, miR-22-3p, novel\_32, miR-154b-5p, miR-34c-5p, miR-323-5p, miR-3965, miR-625-5p, miR-339b, miR-145a-3p, miR-122-5p, miR-6525, miR-1260b, miR-346, miR-324-3p, miR-331-3p, miR-665, miR-2285j, miR-874-5p, miR-486b-3p, miR-138-5p, novel\_9, novel\_79, miR-7641, miR-18a-3p, miR-6517, miR-214-5p, miR-328-3p, miR-1343-5p, miR-1193, miR-128-3p, miR-378d, miR-34a-5p, miR-3064-5p, miR-345-3p, novel\_39, miR-486-3p, miR-29b-1-5p, miR-2478, miR-324-3p, miR-339a, miR-1260a, miR-618, miR-210-5p, miR-107, miR-34b-5p, miR-221-5p, novel\_127, miR-2898, miR-466i-5p, miR-191-3p, miR-6516-3p, miR-203b-5p, miR-135a-1-3p, miR-576-3p, miR-2285n, miR-331-3p, miR-378c, miR-378c, novel\_99, miR-378f, miR-6516-3p, miR-1248, miR-301, miR-129b-3p, miR-670-3p, miR-378e, miR-3068-3p, miR-378a-3p, miR-200c-3p, miR-378a-5p, miR-466f-3p, miR-200c, miR-205-5p, miR-422a, miR-500a-5p, miR-378d, miR-376a-5p, miR-494-3p, miR-378c, miR-148a-5p, miR-200b-3p, miR-376a-5p, miR-378i, miR-378b, miR-378a-3p, miR-188-3p, miR-758-3p, miR-378h, miR-200b, miR-3431, miR-214-5p, miR-9788-3p, miR-545-5p, miR-532-3p, miR-429-3p

miR-18a-3p, miR-106a, miR-212-5p, miR-210-3p, miR-200b, novel\_83, novel\_133, miR-2366, miR-193b-5p, miR-2904, miR-217-5p, miR-5703, miR-4429, miR-19b-3p, miR-664-5p, miR-361-5p, miR-20a, miR-486-3p, novel\_17, miR-185-3p, miR-125b, miR-92a-1-5p, miR-320d, miR-106a, miR-202-5p, miR-760-3p, miR-99a-3p, miR-3653-3p, miR-504-5p, miR-140-5p, miR-30c-1-3p, miR-296-3p, miR-377-3p, miR-10a, miR-6516, miR-6130, miR-139-5p, miR-204-3p, miR-299, miR-450a-1-3p, miR-129b-3p, miR-2312, miR-1827, miR-539-5p, miR-4510, miR-665-5p, miR-10b-5p, miR-6525, miR-769-5p, miR-224-5p, miR-346, miR-3184-5p, miR-6134, miR-222-3p, miR-320e, miR-664a-5p, miR-450b-3p, miR-17-3p, miR-1343-3p, miR-145b, miR-27a-3p, miR-221-3p, miR-484, miR-10b, miR-541, miR-758-3p, miR-1388-5p, miR-1839-5p, miR-106a-5p, miR-33a-5p, miR-30c-1-3p, miR-758-3p, miR-320b, miR-326, miR-106b-5p, miR-491-5p, miR-139-5p, miR-20a-3p, miR-27a-3p, miR-361-3p, miR-140-5p, miR-221, miR-129b-5p, miR-378j, miR-504, miR-2447, miR-3059-5p, miR-541-3p, miR-2285f, novel\_111, miR-423-5p, miR-769-5p, miR-222, miR-429-3p, miR-1224-5p, miR-6516-5p, miR-545-5p, miR-450a-1-3p, miR-1343-5p, miR-23b-5p, miR-330-5p, miR-128-3p, miR-200b-3p, miR-10a-5p, miR-200c, miR-30c-2-3p, miR-217, miR-17-3p, miR-127-5p, miR-200c-3p, novel\_96, miR-543-5p, novel\_127, miR-874-3p, miR-99a-3p, miR-2355-5p, miR-125a, miR-769, miR-133c, miR-93-5p, miR-17-5p, miR-320a, miR-876-3p, miR-20b-5p, miR-3074-1-3p, miR-671-5p, miR-93, miR-323-3p, miR-1197-3p, miR-99b-3p, miR-5100, miR-125b-5p, miR-486b-3p, miR-187-3p, miR-432-5p, miR-3431, miR-185-5p, miR-20b, miR-432, miR-2113, miR-450c-3p, novel\_23, miR-145a-5p, miR-27b-3p, miR-432-3p, miR-654-3p, miR-432-3p, miR-296-3p, miR-224-5p, miR-377-3p, miR-296-3p, novel\_51, miR-17-5p, miR-106a-5p, miR-1343-5p, miR-125a-5p, miR-320b, miR-10a-5p, miR-432, miR-542-3p, miR-197-3p, miR-16b, miR-497-5p, miR-3120-5p, miR-103a-3p, miR-2285g, miR-432-5p, miR-9788-3p, miR-2285e, miR-103, novel\_115, miR-16b, miR-2411-3p, miR-424-5p, miR-2330-5p, miR-432-3p, miR-432-3p, miR-4532, miR-18a-3p, miR-1291, miR-107, miR-195a-5p, miR-139-5p, miR-3120-3p, miR-499a-3p, miR-4324, miR-15a, miR-133a-5p, miR-16a, miR-33a-3p, miR-2284w, miR-2428, miR-345-3p, miR-2366, miR-5703, miR-133a-3p, miR-18a-3p, miR-423-3p, miR-322-5p, miR-15a-5p, miR-532-3p, miR-345-3p, miR-221-5p, miR-107, novel\_127, miR-376c-3p, novel\_39, miR-486-3p, miR-21a-3p, miR-2285c, miR-3154, miR-133b-3p, miR-221-5p, miR-874-3p, miR-27a-5p, miR-499b-3p, miR-376e-3p, miR-139-5p, novel\_32, miR-15b-5p, miR-376c-3p, miR-424-5p, miR-486b-3p, miR-16-5p, miR-133a-3p, novel\_44, miR-346 miR-361-3p, miR-486-3p, miR-8485, miR-4510, miR-2898, miR-138-5p, miR-1343-5p, miR-147-5p, miR-486b-3p, miR-7-5p, miR-324-3p, miR-6130, miR-185-5p, miR-9788-3p, miR-149-5p, miR-26b-3p, miR-138, miR-2426, miR-671-5p, miR-361-3p, miR-7b-5p, miR-1343-5p miR-345-5p, miR-345-5p, miR-3120-5p, novel\_94, miR-199a-3p, miR-1197-5p, miR-361-3p, miR-222-5p, miR-199a-3p, miR-345-5p, miR-219a-5p

miR-324-3p, miR-125b, miR-185-3p, miR-466i-5p, miR-21-3p, miR-2432, miR-486-3p, miR-126-3p, miR-2300b-3p, miR-140-3p, miR-5703, miR-188-3p, miR-133a-3p, miR-378d, miR-18a-3p, miR-532-3p, miR-500, miR-708-5p, miR-4492, miR-129-5p, miR-487a-5p, miR-3074-5p, miR-4510, miR-214, miR-6525, miR-3184-5p, miR-338-3p, miR-6134, miR-500a-3p, miR-18a-5p, miR-345-5p, miR-2331-3p, miR-296-3p, miR-132-5p, miR-6130, miR-22-3p, miR-342, miR-431-5p, miR-3955-3p, miR-214-3p, miR-574-3p, miR-376b, miR-3187-3p, miR-193a, miR-484, miR-7857, miR-30b-3p, miR-1388-5p, miR-1839-5p, miR-2300a-5p, novel\_78, miR-1298-3p, miR-455-3p, miR-335, miR-9-5p, miR-423-5p, miR-361-3p, miR-129b-5p, miR-4792, miR-7977, miR-25, miR-203-3p, miR-454-5p, miR-1260a, miR-200c, miR-200c-3p, miR-191-3p, novel\_127, miR-4286, miR-28b, miR-450b-5p, novel\_39, miR-1957a, miR-490-3p, miR-1271-3p, miR-1343-5p, miR-429-3p, miR-1224-5p, miR-431, miR-18b-5p, miR-9-5p, miR-331-3p, miR-125b-5p, miR-138-5p, novel\_9, miR-28-5p, miR-486b-3p, novel\_42, miR-1260b, miR-137-3p, miR-18a, miR-3154, miR-345-5p, miR-7144-5p, miR-671-5p, miR-485-5p, miR-574-5p, miR-874-3p, miR-2355-5p, miR-370-3p, miR-125a, miR-324-5p, miR-133c, miR-154b-5p, miR-7-5p, novel\_51, miR-452-5p, miR-1343-5p, miR-125a-5p, miR-654-3p, miR-345-5p, miR-873a-5p, miR-7b-5p, miR-1843b-5p, miR-22-3p, miR-374b-3p, miR-138, miR-30b-3p, miR-219a-1-3p, miR-1260b, miR-31-5p, miR-133b-5p, miR-26b-3p, novel\_116, miR-2355-3p, miR-28c, miR-502b, miR-342-3p, miR-335-5p, miR-18b, miR-378b, miR-18a-3p, miR-3074-5p, miR-320b, miR-2404, miR-374c-3p, novel\_69

miR-130b-5p, miR-4492, miR-129-5p, miR-30e-3p, miR-30a-3p, miR-6525, miR-181c-5p, miR-129-2-3p, miR-3074-5p, miR-665-5p, miR-345-5p, miR-1827, miR-543-3p, miR-1895, miR-2285c, miR-299, miR-655, miR-129b-3p, miR-216b-5p, miR-499b-3p, miR-15b-5p, miR-32-5p, miR-296-3p, miR-202-5p, miR-2484, novel\_17, miR-2285p, miR-618, miR-345-3p, miR-92a-1-5p, miR-219b-5p, miR-181b-1-3p, miR-143-3p, miR-486-3p, miR-2285w, miR-369-3p, miR-33b-3p, miR-142-3p, miR-493-3p, miR-34a-5p, miR-133a-3p, miR-193b-5p, miR-1434-5p, miR-217-5p, miR-2284h-5p, miR-18a-3p, miR-212-5p, miR-30d-3p, miR-499a-5p, miR-490-5p, miR-101-3p, miR-363-3p, miR-3956-3p, miR-136-5p, miR-3963, miR-1983, miR-493-5p, miR-335-3p, miR-499a-3p, miR-25, miR-487b-5p, miR-103a-2-5p, miR-199b-5p, miR-199a-3p, miR-182-5p, miR-16b, miR-29b-1-5p, miR-8485, miR-101b-3p, miR-1388-3p, miR-124a, miR-2284r, miR-147a, miR-421, miR-455-3p, miR-330-3p, miR-181b-2-3p, miR-331-5p, miR-1260b, miR-16-5p, miR-193a-5p, miR-2318, miR-345-5p, miR-876-3p, miR-1248, miR-331-5p, miR-301, miR-25-3p, miR-874-3p, miR-1271, miR-127-5p, miR-152-3p, novel\_127, miR-205-5p, miR-92b-3p, novel\_39, miR-2284f, miR-3064-5p, miR-23b-5p, miR-330-5p, miR-758-5p, miR-322-5p, miR-129-1-3p, novel\_121, miR-429-3p, miR-2285ad, miR-142b, miR-2284o, miR-199b-5p, miR-374c-5p, miR-335-5p, miR-2284e, miR-412-3p, miR-148a-3p, miR-3591-3p, miR-1306, miR-374c-3p, miR-181b-3p, miR-320c, miR-677, miR-3074-5p, novel\_68, miR-7-5p, miR-2411-3p, novel\_51, miR-105-5p, miR-32, miR-365b-5p, miR-503-3p, miR-493-5p, miR-6240, miR-380-5p, miR-16b, miR-188-5p, miR-497-5p, miR-7b-5p, miR-19b-2-5p, miR-432, miR-22-3p, miR-412-5p, miR-194-3p, miR-340-3p, miR-17-3p, miR-424-5p, miR-708-5p, miR-655-3p, miR-29b-2-5p, miR-19b-1-5p, miR-2312, novel\_99, let-7f-1-3p, miR-27b-5p, miR-544-3p, novel\_32, miR-22-3p, miR-660-5p, miR-532-5p, miR-190a-5p, miR-17-3p, miR-665, let-7f, let-7b-5p, miR-142a-5p, miR-93, miR-3607-3p, let-7b, miR-145a-3p, miR-4510, miR-20b-5p, novel\_48, miR-671-5p, miR-30f, miR-93-5p, miR-129b-3p, miR-30d-5p, miR-17-5p, miR-30e-5p, miR-223-5p, let-7i-5p, miR-374c-3p, miR-6130, miR-216b-3p, miR-30d, let-7k, novel\_127, miR-17-3p, miR-106a, let-7f-5p, miR-98-5p, miR-200c-3p, miR-216a-5p, miR-219b-5p, let-7c-5p, miR-2285af, miR-210-5p, let-7g, miR-28b, miR-20a, miR-369-3p, miR-181a-2-3p, miR-200b-3p, let-7d, miR-142-3p, miR-1197-5p, miR-30a-5p, miR-1961, miR-9-5p, miR-200b, miR-18a-3p, miR-429-3p, miR-106a, miR-203b-5p, miR-656-5p, let-7i, miR-382-5p, miR-30b-5p, miR-2285n, miR-6402, miR-20a-5p, miR-28c, miR-877-3p, miR-9-5p, miR-190b-5p, miR-17-3p, miR-3059-5p, miR-135a-2-3p, miR-877-3p, let-7e-5p, miR-1306, miR-3970, miR-18a-3p, let-7d-5p, miR-203-3p, miR-2285u, let-7e, miR-190a, miR-505, miR-106b-5p, miR-106a-5p, miR-17-5p, miR-1306-5p, miR-2285r, let-7c-3p, miR-676-3p, miR-382, miR-744-3p, let-7a-5p, miR-106a-5p, miR-2284x, miR-653, miR-1434-3p, miR-455-3p, miR-20b, let-7g-5p, novel\_78

miR-192-3p, miR-2285b, let-7g, miR-450b-5p, miR-3529-3p, miR-543-5p, miR-127-5p, let-7f-5p, miR-200c-3p, miR-6536, miR-17-3p, miR-450a-2-3p, let-7c-5p, miR-200c, miR-664-3p, miR-219-3p, novel\_121, miR-129-1-3p, miR-2284z, miR-6516-5p, miR-1271-5p, miR-322-5p, miR-1224-5p, miR-429-3p, miR-2285ad, miR-222, miR-200b-3p, miR-30c, miR-155-5p, miR-582-3p, let-7d, miR-3578, miR-1197-3p, miR-16-5p, miR-204-5p, miR-331-5p, miR-138-5p, miR-135a-5p, miR-100-3p, miR-144, miR-135a-1-3p, miR-410-5p, novel\_63, miR-300-3p, miR-331-5p, miR-215-5p, miR-2285aa, novel\_48, miR-10b-3p, miR-331-5p, miR-296-3p, miR-654-3p, miR-2285r, miR-628-5p, miR-466f-3p, novel\_51, miR-190a, miR-377-3p, miR-296-3p, let-7g-5p, miR-3535, miR-412-5p, miR-2285g, miR-377-5p, miR-2889, miR-497-5p, miR-138, miR-380-3p, miR-16b, miR-1434-3p, miR-1285, miR-2428, miR-323c, miR-211, miR-495-3p, miR-17-3p, miR-199c, novel\_1, miR-6119-3p, novel\_87, let-7i, miR-16a, miR-133a-5p, miR-15a, miR-144-3p, miR-323a-5p, miR-2404, miR-7-1-3p, miR-26b-5p, miR-3120-3p, miR-216b-3p, miR-3074-5p, let-7e-5p, miR-195a-5p, miR-135b-5p, miR-3065-5p, miR-2387, miR-376b-5p, miR-380-3p, miR-2432, miR-377-5p, miR-142a-3p, miR-130a-5p, miR-664b-3p, miR-183-5p, miR-216c-5p, let-7k, miR-98-5p, miR-92a-1-5p, miR-216a-5p, novel\_17, miR-2285p, miR-26a-5p, miR-30b, miR-199a-3p, miR-222-5p, miR-15a-5p, miR-200b, miR-383-5p, miR-7859, miR-548e-3p, miR-218-1-3p, miR-215-5p, miR-1961, miR-376a-5p, miR-30c-5p, let-7b-5p, miR-346, miR-6525, miR-1271, miR-3074-5p, miR-129-2-3p, let-7b, miR-669a-3p, miR-190a-5p, miR-17-3p, miR-155-5p, miR-664a, novel\_74, miR-320e, miR-219b-3p, let-7f, miR-222-3p, let-7i-5p, miR-155-5p, miR-15b-5p, miR-323-5p, miR-6516, miR-192-5p, miR-377-3p, miR-582-5p, miR-216b-3p, novel\_99, miR-582-5p, miR-30f, miR-133-3p, miR-2285c, miR-1b-5p, miR-101-3p, miR-



miR-186-5p, miR-140-5p, miR-378a-3p, miR-1277-3p, miR-552-3p, miR-532-5p, miR-204-3p, miR-151-3p, miR-29b-2-5p, miR-320e, miR-664a-5p, miR-874-5p, miR-129-5p, miR-378c, miR-3184-3p, miR-145a-3p, miR-3074-2-3p, miR-6525, miR-338-3p, miR-378i, miR-5703, miR-378a-3p, miR-1197-5p, miR-4429, miR-664-5p, miR-218-1-3p, miR-18a-3p, miR-505-3p, miR-2285p, miR-210-5p, miR-216a-5p, miR-422a, miR-320d, miR-21-3p, miR-183-5p, miR-29b-1-5p, miR-130a-5p, miR-380-3p, miR-378e, miR-7857-3p, miR-203-3p, miR-371a-5p, miR-107-5p, miR-2447, miR-541-3p, miR-212-3p, miR-194b-5p, miR-1285-5p, miR-296-5p, miR-6529a, miR-378b, miR-541, miR-125b-2-3p, miR-378c, miR-101c, miR-2284aa, miR-548w, miR-199b-3p, miR-151a-3p, miR-1298-3p, miR-539-5p, miR-216a-3p, miR-320b, miR-326, miR-505, miR-29b-1-5p, miR-491-5p, miR-3955-3p, miR-103a-2-5p, miR-382-3p, miR-744-3p, miR-378d, miR-320a, miR-3154, miR-7144-5p, miR-3068-3p, miR-2285aa, miR-615-5p, miR-3959-5p, miR-34c-3p, miR-5100, miR-100-3p, miR-409-3p, novel\_9, let-7e-3p, miR-1197-3p, miR-378c, miR-365a-5p, miR-330-5p, miR-429-3p, miR-378h, miR-2284z, miR-450a-1-3p, miR-2285af, miR-200c, miR-3071-3p, miR-200c-3p, miR-127-5p, novel\_96, novel\_127, miR-29b-2-5p, miR-2385-3p, miR-181a-2-3p, miR-450b-5p, miR-150-5p, miR-18a-3p, miR-21c, miR-505-3p, miR-378f, miR-378b, miR-374c-3p, miR-320c, miR-625-3p, miR-199c, miR-326-3p, miR-7b-5p, miR-223-3p, miR-542-3p, miR-194-5p, miR-374b-3p, miR-380-3p, miR-21-5p, miR-26a-2-3p, miR-2284x, miR-188-5p, miR-194-3p, miR-2355-3p, miR-7-5p, miR-365b-5p, miR-194a, miR-124-5p, miR-466f-3p, miR-668-3p

miR-228bad, miR-222, miR-322-5p, miR-129-1-3p, miR-450a-1-3p, miR-545-5p, miR-30a-5p, miR-30c, miR-128-3p, miR-29b-2-5p, miR-148b-5p, miR-3065-3p, miR-125a-3p, miR-376b-3p, miR-543-5p, miR-107, miR-125a, miR-370-3p, miR-2355-5p, miR-133c, miR-30e-5p, miR-17-5p, miR-362-5p, miR-93-5p, miR-2318, miR-329a, miR-190a-3p, miR-20b-5p, miR-1306-5p, miR-16-5p, miR-1197-3p, miR-500b-5p, miR-93, miR-2332, novel\_63, miR-2284k, miR-135a-5p, miR-125b-5p, miR-138-5p, miR-204-5p, miR-592, miR-103a-3p, miR-187-3p, miR-2284d, miR-412-5p, miR-103, miR-20b, miR-1434-3p, miR-1843b-5p, novel\_23, miR-3071-5p, miR-450c-3p, miR-138, miR-2284ab, miR-16b, miR-2284x, miR-188-5p, miR-497-5p, miR-6240, miR-382, miR-2285r, miR-539-3p, miR-106a-5p, miR-17-5p, miR-330-3p, miR-466f-3p, miR-125a-5p, miR-452-5p, miR-660, miR-329-5p, miR-2387, miR-216a-3p, miR-376b-3p, miR-107, miR-412-3p, miR-1291, miR-135b-3p, miR-195a-5p, miR-6516-3p, miR-135a-2-3p, miR-211, miR-2285m, miR-2284w, miR-576-3p, miR-142b, miR-20a-5p, miR-4324, miR-15a, miR-16a, miR-147-5p, miR-106a, miR-485-3p, miR-340-5p, miR-15a-5p, miR-487a-3p, miR-376a-5p, miR-362-3p, miR-2300b-3p, miR-30c-5p, miR-188-3p, miR-142-3p, miR-133a-3p, miR-20a, miR-130a-5p, miR-30b, miR-125b, miR-500a-5p, miR-219b-5p, miR-760-3p, miR-466i-5p, miR-106a, miR-2284m, miR-1277-5p, miR-30d, miR-3653-3p, miR-660-5p, miR-140-5p, miR-552-3p, miR-3065-3p, miR-15b-5p, miR-877-5p, miR-450a-1-3p, miR-433-3p, miR-30d-5p, miR-30f, novel\_99, miR-625-5p, miR-129-2-3p, miR-145a-3p, miR-2330-3p, miR-3074-2-3p, miR-224-5p, miR-338-3p, miR-2285j, miR-29b-2-5p, miR-324-3p, miR-6516-3p, miR-450b-3p, miR-4492, miR-424-5p, miR-330-3p, miR-376b-3p, miR-2459, miR-1185-3p, miR-216a-3p, miR-500-5p, miR-221-3p, miR-296-5p, miR-329-3p, miR-450b-5p, miR-362-3p, miR-21b, miR-106a-5p, miR-424-5p, miR-1388-3p, miR-106b-5p, miR-93, miR-6525, miR-374a-3p, miR-122-5p, miR-365a-5p, miR-6134, novel\_42, miR-4510, miR-214, miR-3074-2-3p, miR-4492, miR-708-5p, miR-129-5p, miR-374b-3p, miR-486b-3p, miR-134-5p, miR-130b-5p, miR-28-5p, miR-2433, miR-665, miR-132-5p, miR-377-3p, miR-6130, miR-22-3p, miR-3957, miR-3957-5p, miR-874-3p, miR-660-5p, miR-370-3p, miR-552-3p, miR-1271, let-7g-3p, miR-329b, miR-1895, miR-20b-5p, novel\_99, miR-1827, miR-21a-3p, miR-129b-3p, miR-93-5p, miR-17-5p, miR-486-3p, miR-20a, miR-2887, miR-106a, miR-760-3p, miR-200c-3p, miR-543-5p, miR-21-3p, miR-200c, novel\_17, miR-500a-5p, miR-483-3p, miR-23c, miR-200b, miR-134-5p, miR-214-5p, miR-429-3p, miR-106a, miR-142-3p, miR-200b-3p, let-7a-2-3p, miR-134, miR-361-3p, miR-371b-3p, miR-342-3p, novel\_60, miR-3059-5p, miR-335-5p, miR-3956-3p, miR-212-3p, novel\_101, miR-128-1-5p, miR-335, miR-656-5p, miR-6123, miR-1247-3p, miR-6402, miR-20a-5p, miR-378g, novel\_68, miR-1291, miR-361-3p, miR-3141, miR-129b-5p, miR-8485, let-7a-2-3p, miR-1388-3p, miR-130b-5p, miR-494-3p, miR-106a-5p, miR-23a-3p, miR-483-3p, miR-452-5p, miR-660, miR-214-3p, miR-342, miR-377-3p, miR-365b-5p, miR-3141, miR-106b-5p, novel\_51, miR-106a-5p, miR-17-5p, miR-134-3p, miR-149-5p, miR-20b, miR-187-3p, miR-1343-3p, miR-450b-5p, miR-296-5p, miR-22-3p, miR-125b-2-3p

TEKT3 ENSOARGO(tektin 3) miR-3960, miR-24-3p

KCNK5 ENSOARGO(potassium) miR-3960, miR-24-3p

SLC9A3R2 ENSOARGO(solute carrier) miR-3960, miR-24-3p

let-7i, miR-3964, novel\_120, miR-135a-2-3p, novel\_101, miR-423-5p, miR-148a-3p, miR-1306, miR-3065-5p, miR-18a-3p, let-7e-5p, miR-877-3p, miR-135b-5p, miR-6516-3p, miR-20a-3p, miR-669, let-7d-5p, miR-1185-2-3p, miR-199a-3p, miR-1306-5p, miR-505, miR-660, let-7e, let-7a-5p, let-7f-2-3p, let-7f-2-3p, miR-30c-1-3p, miR-654-3p, miR-432-3p, miR-6412, miR-758-3p, miR-491-3p, miR-6529a, miR-758-3p, miR-1260b, miR-1839-5p, miR-2284aa, miR-3955-5p, miR-548w, miR-539-5p, let-7g-5p, miR-147a, miR-411-5p, miR-1185-3p, let-7f, miR-135a-1-3p, miR-6740-5p, miR-135a-5p, miR-155-5p, miR-6516-3p, miR-539-5p, let-7b, miR-1260b, miR-3184-5p, let-7b-5p, miR-301, miR-200a-5p, miR-3154, miR-2318, miR-23a-5p, miR-30c-1-3p, miR-660-5p, miR-141-3p, miR-155-5p, let-7i-5p, miR-154b-5p, miR-1260a, miR-6119-5p, miR-30c-2-3p, miR-500a-5p, let-7c-5p, miR-217, miR-450a-2-3p, miR-466i-5p, let-7f-5p, miR-98-5p, miR-30b-3p, let-7k, novel\_127, miR-200a-3p, miR-152-3p, miR-181a-2-3p, miR-345-3p, miR-4286, miR-2424, let-7g, miR-143-3p, miR-1961, miR-193b-5p, miR-217-5p, miR-23b-5p, miR-5703, miR-188-3p, let-7d, miR-218-1-3p, miR-155-5p, miR-18a-3p, miR-148b-3p, miR-222-5p, miR-2284z, miR-199a-3p, miR-1247-5p, miR-532-3p, miR-592, miR-134-5p, miR-204-5p, miR-130b-5p, miR-410-3p, miR-6516-3p, miR-665, miR-125b-5p, miR-2284k, miR-500b-5p, miR-3074-2-3p, miR-133a-3p, miR-144-5p, novel\_99, miR-7144-5p, miR-3074-1-3p, miR-376c-5p, miR-2312, miR-133b-3p, miR-376c-5p, miR-362-5p, miR-2284n, miR-3965, miR-377-3p, miR-192-5p, miR-215-5p, miR-141-3p, miR-125a, miR-660-5p, miR-200a-3p, miR-200c-3p, miR-2284m, miR-202-5p, miR-125b, miR-500a-5p, miR-324-3p, miR-664-3p, miR-200c, miR-125a-3p, novel\_17, miR-26a-5p, miR-2284a, miR-2284y, miR-2411, miR-130a-5p, miR-421-5p, miR-329a-5p, miR-2284u, miR-148a-5p, miR-142-3p, miR-582-3p, miR-134, miR-215-5p, miR-486-5p, miR-134-5p, miR-2284z, miR-545-5p, miR-2411-5p, miR-9-5p, miR-383-5p, miR-302a-5p, miR-505-3p, miR-429-3p, miR-421-5p, miR-628-3p, miR-2284w, miR-154a, novel\_27, novel\_111, miR-362-5p, miR-211, miR-9-5p, novel\_101, miR-1839-3p, miR-2285f, miR-3956-3p, miR-3059-5p, novel\_60, miR-505-3p, miR-2319a, miR-136-5p, miR-378b, miR-376b-5p, miR-2285ab, miR-1185-2-3p, miR-144-5p, miR-211-5p, miR-126b-5p, miR-3120-3p, miR-26b-5p, miR-499b-5p, miR-2319b, miR-216b-3p, miR-329-5p, miR-664b, miR-2284g, miR-125a-5p, miR-660, miR-377-3p, miR-2284b, let-7c-3p, miR-1839-3p, miR-130b-5p, miR-3120-5p, miR-2284aa, miR-2284ab, miR-6529a, miR-1185-3p, miR-2355-3p, miR-126a-5p, miR-148b-5p, miR-500-5p, miR-26b-3p, novel\_4, miR-3955-5p

miR-6516-3p, miR-17-3p, miR-28-5p, miR-130b-5p, miR-708-5p, miR-30e-3p, miR-135a-1-3p, novel\_63, miR-29b-2-5p, miR-409-3p, miR-30a-3p, miR-6740-5p, miR-6525, miR-338-3p, let-7g-3p, miR-876-3p, miR-2312, novel\_99, miR-671-5p, miR-424-3p, miR-2285c, miR-25-3p, miR-3965, miR-6516, miR-377-3p, miR-140-5p, miR-32-5p, miR-2331-3p, miR-2285aa, miR-2355-5p, miR-200c-3p, miR-17-3p, miR-299-3p, miR-92a-3p, novel\_96, miR-107, miR-200c, miR-210-5p, miR-2285af, miR-3071-3p, miR-92b-3p, miR-192-3p, miR-29a-5p, miR-1957a, miR-181a-2-3p, miR-30a-3p, miR-29b-2-5p, miR-128-3p, miR-200b-3p, miR-1197-5p, miR-200b, miR-6516-5p, miR-429-3p, miR-299a-3p, miR-548e-3p, miR-505-3p, novel\_1, miR-92a-3p, miR-147-5p, miR-101-3p, miR-6402, miR-576-3p, miR-2285n, novel\_111, miR-212-3p, miR-363-3p, miR-17-3p, miR-2285f, miR-107, miR-505-3p, miR-2285ab, miR-216a-3p, miR-299b-3p, miR-491-5p, miR-377-3p, miR-32, miR-2285r, miR-503-3p, miR-494-3p, miR-130b-5p, miR-33a-5p, miR-23a-3p, miR-450b-5p, miR-7862, miR-101c, miR-539-5p, miR-2285g, miR-103, miR-2285e, miR-194-3p, miR-216a-3p, miR-103a-3p, miR-26b-3p  
 miR-148a-3p, miR-378b, miR-3065-5p, miR-412-3p, miR-19a-3p, miR-10a-5p, miR-7-1-3p, miR-3120-3p, miR-670-3p, miR-29a-3p, miR-320c, miR-6535, miR-502-5p, miR-4324, miR-425-5p, novel\_87, novel\_1, miR-29a, miR-199c, miR-495-3p, miR-29c-3p, miR-211, miR-3959-3p, novel\_27, miR-301b-3p, miR-1285, miR-1843b-5p, miR-223-3p, miR-181a-5p, miR-197-3p, miR-138, miR-380-3p, miR-29b, miR-16-1-3p, miR-455-5p, miR-339-5p, miR-130a-3p, miR-412-5p, miR-377-3p, miR-105-5p, miR-2411-3p, miR-455-5p, miR-660, miR-539-3p, miR-424-3p, miR-23b, miR-320a, miR-2318, miR-365a-3p, miR-3965, miR-410-5p, miR-29b-3p, miR-494-5p, miR-409-3p, miR-138-5p, miR-31-3p, miR-204-5p, miR-134-5p, miR-193a-5p, miR-3607-3p, miR-345-3p, miR-3578, miR-134, miR-1290, miR-2427, miR-29d-3p, miR-105-2, miR-10a-5p, miR-412, novel\_79, miR-1224-5p, miR-134-5p, miR-129-1-3p, miR-2285af, miR-6119-5p, miR-339a, miR-127-5p, miR-181b-5p, miR-152-3p, miR-3529-3p, miR-148b-5p, miR-1271-3p, miR-192-3p, miR-381-3p, miR-136-5p, miR-1983, miR-2319b, miR-541-5p, miR-211-5p, miR-107-5p, miR-3059-5p, miR-32-3p, miR-181d-5p, miR-10b, miR-412-3p, miR-758-3p, miR-2300a-5p, miR-199b-3p, miR-105-1, miR-5010-3p, miR-455-3p, miR-421, miR-320b, miR-182-5p, miR-130b-3p, miR-3955-3p, miR-103a-2-5p, miR-382-3p, miR-23a-3p, miR-758-3p, let-7f-1-3p, miR-411, miR-339b, miR-625-5p, miR-2331-3p, miR-545-3p, miR-32-3p, miR-660-5p, miR-182-5p, miR-301a-3p, miR-377-3p, miR-10a, miR-2285j, miR-454-3p, miR-129-2-3p, miR-10b-5p, miR-181c-5p, miR-140-3p, miR-188-3p, miR-1197-5p, miR-4429, miR-19b-3p, miR-16-1-3p, let-7a-3p, miR-3600, miR-485-3p, miR-23b-3p, miR-487a-3p, miR-148b-3p, miR-23c, miR-2285p, novel\_17, miR-500a-5p, miR-320d, miR-3653-3p, miR-130a-5p

EIF3M      ENSOARGO(eukaryot)

ARRDC3      ENSOARGO(arrestin)

|      |                   |                                                                                                                                                                                                                                                                                                                                                                                                                                                                                                                                                                                                                                                                                                                                                                                                                                                                                                                                                                                                                                                                                                                                                                                                                                                                                                                                                                                                                                           |
|------|-------------------|-------------------------------------------------------------------------------------------------------------------------------------------------------------------------------------------------------------------------------------------------------------------------------------------------------------------------------------------------------------------------------------------------------------------------------------------------------------------------------------------------------------------------------------------------------------------------------------------------------------------------------------------------------------------------------------------------------------------------------------------------------------------------------------------------------------------------------------------------------------------------------------------------------------------------------------------------------------------------------------------------------------------------------------------------------------------------------------------------------------------------------------------------------------------------------------------------------------------------------------------------------------------------------------------------------------------------------------------------------------------------------------------------------------------------------------------|
| HAGH | ENSOARGO(hydroxya | <p>miR-188-3p, miR-1246, miR-2366, miR-7641, miR-30d-3p, miR-450a-1-3p, miR-199a-3p, miR-328-3p, miR-505-5p, miR-219b-5p, miR-125b, miR-1260a, miR-125a-3p, miR-21-3p, miR-17-3p, miR-320d, miR-3064-5p, miR-1, miR-29b-2-5p, miR-4286, miR-329a-5p, miR-503-5p, miR-143-3p, miR-450b-5p, miR-29b-1-5p, miR-664b-3p, miR-129b-3p, miR-320a, miR-450a-1-3p, miR-485-5p, miR-1248, miR-1814c, miR-345-5p, miR-345-5p, miR-3956, miR-125a, miR-574-5p, miR-324-5p, novel_32, miR-125b-5p, miR-331-3p, miR-29b-2-5p, miR-135a-5p, miR-2285j, miR-874-5p, miR-204-5p, miR-17-3p, miR-6128, miR-214, miR-144-5p, miR-433-5p, miR-206-3p, miR-1260b, miR-450c-3p, miR-1a-3p, miR-30b-3p, miR-3120-5p, miR-30b-3p, miR-1260b, miR-3432b, miR-5010-3p, miR-199b-3p, novel_78, miR-455-3p, miR-2355-3p, miR-3431, miR-503-5p, miR-29b-1-5p, miR-3141, miR-199a-3p, miR-503-5p, miR-320b, miR-125a-5p, miR-214-3p, novel_124, miR-3085-3p, miR-124-5p, miR-378a-5p, miR-3955-3p, miR-2483-5p, miR-668-3p, miR-628-5p, miR-345-5p, miR-2310, miR-381-3p, miR-378j, miR-378b, miR-3141, miR-6395, miR-135b-5p, miR-1291, miR-2285u, miR-499b-5p, miR-7977, miR-211-5p, miR-3064-5p, miR-329-5p, miR-320c, miR-144-5p, miR-2404, miR-7857-3p, miR-25, miR-411b-3p, miR-502-5p, miR-576-3p, miR-199c, miR-499a-5p, miR-206, miR-3957-3p, miR-6527, miR-17-3p, miR-452-5p, novel_60, miR-3956-3p, miR-7705, miR-2284w, miR-361-3p, miR-211, novel_111</p> |
| TAB1 | ENSOARGO(TGF-beta | <p>miR-1260b, miR-941, miR-2889, miR-484, miR-541, miR-412-3p, miR-425-3p, miR-1271-5p, miR-1247-5p, novel_83, miR-412, miR-18b-5p, miR-17-3p, miR-3085-3p, miR-760-3p, miR-1260a, miR-432-3p, novel_39, miR-3064-5p, miR-2403, miR-1291, miR-96-5p, miR-18a-5p, miR-543-3p, miR-1827, miR-18b, miR-1306-3p, miR-18a, novel_69, miR-3957, miR-4443, miR-3064-5p, miR-3957-5p, novel_107, miR-17-3p, miR-874-5p, miR-1306-3p, miR-1260b, novel_42, miR-541-3p, miR-1271, miR-6128, miR-17-3p</p>                                                                                                                                                                                                                                                                                                                                                                                                                                                                                                                                                                                                                                                                                                                                                                                                                                                                                                                                           |

miR-54b-3p, miR-32-5p, miR-21-3p, miR-296-3p, miR-582-5p, miR-6516, miR-139-5p, miR-216b-5p, miR-155-5p, miR-3613-5p, miR-411, miR-433-3p, miR-2312, let-7g-3p, miR-582-5p, miR-539-5p, miR-3074-5p, miR-3184-3p, miR-142a-5p, miR-222-3p, miR-30e-3p, miR-30a-3p, miR-219b-3p, miR-29b-2-5p, miR-155-5p, miR-190a-5p, miR-3600, miR-30d-3p, miR-23b-3p, miR-23c, miR-200b, miR-222-5p, miR-199a-3p, miR-376a-5p, miR-1434-5p, miR-19b-3p, miR-218-1-3p, miR-664-5p, miR-361-5p, miR-329a-5p, miR-376a-5p, miR-29b-1-5p, miR-377-5p, miR-125b-2-3p, miR-486-3p, miR-146a-5p, miR-216a-5p, miR-345-3p, miR-3653-3p, miR-21-3p, miR-139-5p, miR-2319b, miR-499b-5p, miR-25, miR-2483-3p, miR-361-3p, miR-221, miR-9-3p, miR-2285f, miR-1296-5p, miR-452-5p, miR-194b-5p, miR-190b-5p, miR-9-3p, miR-219a-2-3p, miR-2440, miR-628-3p, miR-335, miR-539-5p, miR-221-3p, miR-125b-2-3p, miR-1388-5p, miR-450b-5p, miR-101a-5p, miR-21b, miR-1839-5p, miR-16-2-3p, miR-23a-3p, let-7c-3p, miR-33a-5p, miR-199a-3p, miR-342, miR-505, miR-29b-1-5p, miR-487b-5p, miR-146b, miR-370-3p, miR-2355-5p, miR-374c-3p, miR-331-5p, miR-25-3p, miR-324-5p, miR-223-5p, miR-381-3p, miR-301, miR-137-3p, miR-23b, miR-767, miR-2318, let-7g-3p, miR-103b, miR-410-5p, miR-34c-3p, miR-135a-5p, miR-767-5p, miR-486b-3p, miR-222, miR-429-3p, miR-376a-5p, miR-24-2-5p, miR-302a-5p, miR-6516-5p, miR-486-5p, novel\_121, miR-345-3p, miR-200b-3p, miR-155-5p, miR-128-3p, let-7a-2-3p, miR-3529-3p, miR-30a-3p, miR-29b-2-5p, miR-92b-3p, miR-1957a, miR-2285b, miR-200c, miR-219-3p, miR-6119-5p, miR-200c-3p, miR-92a-3p, miR-329-5p, miR-3074-5p, miR-374c-3p, miR-670-3p, miR-2285ab, miR-150-5p, miR-3065-5p, miR-216a-3p, miR-3591-3p, miR-19a-3p, miR-9851-3p, miR-146b-5p, miR-135b-5p, miR-376a-2-5p, miR-342-3p, miR-135a-2-3p, miR-219b-3p, miR-335-5p, miR-2285c, miR-1495-3p, miR-3959-3p, novel\_27, miR-378h, miR-24-2-5p, miR-423-3p, novel\_4, miR-378c, miR-378a-3p, miR-197-3p, miR-1343-5p, miR-2904, miR-378b, miR-378i, miR-8485, miR-378d, miR-130b-5p, miR-1343-5p, novel\_51, miR-422a, miR-324-3p, novel\_17, miR-5126, miR-454-5p, miR-6535, miR-378e, miR-499a-3p, miR-499b-3p, miR-211-5p, miR-370-3p, miR-874-3p, miR-2331-3p, miR-378a-3p, miR-378f, miR-7144-5p, miR-378b, miR-378c, miR-371b-3p, miR-877-3p, miR-211, miR-6128, miR-378c, miR-204-5p, miR-130b-5p, novel\_82, miR-17-3p, novel\_9, miR-4726-5p, miR-486b-3p, miR-4492, miR-2433, miR-320e, miR-361-3p, miR-2428, miR-17-3p, miR-339b, miR-9851-3p, miR-148a-3p, miR-3141, miR-361-3p, miR-598-3p, miR-378g, miR-132-5p, miR-221-5p, miR-615-5p, miR-598-3p, miR-466i-5p, miR-450a-2-3p, miR-17-3p, miR-152-3p, miR-221-5p, miR-339a, novel\_51, miR-3141, miR-324-3p, miR-486-3p, miR-3120-5p, miR-378d, miR-148b-3p, miR-134-3p, miR-147a, miR-455-3p, miR-340-3p, miR-222-5p, novel\_79, miR-339-5p

miR-16-5p, miR-181a-2-3p, miR-1260b, miR-1197-3p, miR-26c, miR-2433, miR-5100, miR-486b-3p, miR-138-5p, miR-2355-5p, miR-141-3p, miR-615-5p, miR-215-5p, miR-574-5p, miR-3068-3p, miR-324-5p, miR-199a-5p, miR-34c-5p, miR-769, miR-3965, miR-137-3p, miR-18a, miR-3154, miR-7144-5p, miR-485-5p, miR-10b-3p, miR-3064-5p, miR-181a-2-3p, miR-200a, miR-199a-5p, novel\_39, miR-3065-3p, miR-28b, miR-1260a, miR-205-5p, miR-543-5p, miR-200a-3p, novel\_96, miR-450a-2-3p, miR-17-3p, miR-2898, miR-7641, miR-18b-5p, miR-299a-3p, miR-2285ad, miR-423-3p, miR-322-5p, miR-758-5p, miR-483-3p, miR-1343-5p, miR-23b-5p, miR-330-5p, miR-615-3p, miR-3591-5p, miR-17-3p, miR-135a-2-3p, miR-326-3p, miR-449a, miR-301b-3p, miR-199b-5p, miR-24-3p, miR-16a, miR-34c, miR-382-5p, miR-15a, miR-4324, miR-28c, miR-656-5p, novel\_1, novel\_68, miR-3074-5p, miR-677, miR-669, miR-6535, miR-181b-3p, novel\_69, miR-34b, miR-299b-3p, miR-1306, miR-18b, miR-195a-5p, miR-1291, miR-450b-3p, miR-363-5p, miR-668-3p, miR-2483-5p, miR-628-5p, miR-130b-5p, miR-432-3p, miR-190a, novel\_51, miR-1343-5p, miR-106b-3p, miR-483-3p, miR-130a-3p, miR-31-5p, miR-149-5p, miR-6238, miR-194-3p, miR-432-5p, miR-412-5p, miR-134-3p, miR-185-5p, miR-432, miR-542-3p, miR-26a-2-3p, miR-497-5p, miR-744-5p, miR-138, miR-16b, miR-30b-3p, miR-1260b, miR-16-1-3p, miR-425-5p, miR-3074-5p, miR-4510, miR-6134, miR-769-5p, miR-132-5p, miR-324-3p, miR-665, miR-2285j, miR-190a-5p, miR-874-5p, miR-424-5p, miR-454-3p, miR-4492, miR-130b-5p, novel\_74, miR-17-3p, miR-664a, miR-3065-3p, novel\_107, miR-182-5p, miR-545-3p, miR-221-5p, miR-204-3p, miR-15b-5p, miR-877-5p, miR-301a-3p, miR-192-5p, miR-27a-5p, miR-6130, miR-129b-3p, miR-433-3p, miR-1895, miR-1827, miR-186-5p, miR-18a-5p, miR-216c-5p, miR-486-3p, miR-2432, miR-143-3p, miR-376a-5p, miR-181b-1-3p, miR-324-3p, miR-185-3p, miR-210-5p, miR-

TSTA3      ENSOARGO(tissue s

miR-496-5p, miR-221-3p, miR-6529a, miR-378b, miR-758-3p, miR-378c, miR-424-5p, miR-106a-5p, let-7c-3p, miR-30c-1-3p, miR-378d, miR-758-3p, miR-199a-3p, miR-16b, miR-106b-5p, miR-182-5p, miR-3955-3p, miR-1185-5p, miR-103a-2-5p, miR-20a-3p, miR-541-5p, miR-2483-3p, miR-3082-5p, miR-378e, miR-4443, miR-144-5p, miR-221, miR-140-5p, miR-129b-5p, miR-136-5p, miR-9-3p, miR-376a-3p, miR-8095, miR-107-5p, miR-3958-3p, miR-3968, miR-106a, miR-505-3p, miR-15a-5p, miR-148b-3p, miR-199a-3p, miR-532-3p, miR-193b-5p, miR-2366, miR-378i, miR-140-3p, miR-378a-3p, miR-1193, miR-217-5p, miR-5703, miR-142-3p, miR-19b-3p, miR-493-3p, miR-361-5p, miR-5100, miR-20a, miR-125b-2-3p, miR-380-3p, miR-2285p, miR-618, miR-92a-1-5p, miR-422a, miR-219b-5p, miR-324-3p, miR-216a-5p, miR-106a, miR-21-3p, miR-299-3p, miR-660-5p, miR-548o-3p, miR-140-5p, miR-2331-3p, miR-30c-1-3p, miR-378a-3p, miR-182-5p, miR-552-3p, miR-21-3p, miR-3065-3p, miR-323-5p, miR-301a-3p, miR-15b-5p, novel\_25, miR-21a-3p, miR-433-3p, miR-27b-5p, miR-18a-5p, miR-339b, let-7g-3p, miR-186-5p, miR-625-5p, miR-378c, miR-222-3p, miR-338-5p, miR-665, miR-451a, novel\_74, miR-454-3p, miR-208b-5p, miR-424-5p, miR-103a-3p, miR-31-5p, miR-339-5p, miR-130a-3p, miR-103, miR-20b, miR-653, miR-29b, miR-16b, miR-380-3p, miR-497-5p, miR-2483-5p, miR-22841, miR-106a-5p, miR-17-5p, miR-378a-5p, miR-660, miR-106b-3p, miR-299b-3p, miR-411b-3p, miR-29a-3p, miR-323a-5p, miR-18b, miR-148a-3p, miR-216a-3p, miR-376b-3p, miR-19a-3p, miR-107, miR-378f, miR-505-3p, miR-195a-5p, miR-29c-3p, miR-301b-3p, miR-20a-5p, miR-15a, miR-33a-3p, miR-485-3p, miR-16a, miR-29a, miR-147-5p, miR-222, miR-299a-3p, miR-18b-5p, novel\_79, miR-378h, miR-322-5p, miR-486-5p, miR-545-5p, miR-3591-5p, miR-29d-3p, miR-128-3p, miR-3065-3p, novel\_39, miR-29a-5p, miR-217, miR-339a, miR-30c-2-3p, miR-152-3p, miR-107, miR-2355-



miR-330-5p, miR-30a-5p, miR-1343-5p, miR-429-3p, miR-582-3p, miR-378h, miR-322-5p, miR-664-3p, miR-200c, miR-125a-3p, miR-6119-5p, miR-200a-3p, miR-92a-3p, miR-181b-5p, miR-200c-3p, miR-2898, miR-3064-5p, miR-1, miR-29b-2-5p, miR-490-3p, miR-1271-3p, miR-192-3p, miR-200a, miR-28b, miR-92b-3p, miR-17-5p, miR-320a, miR-93-5p, miR-200a-5p, miR-30e-5p, miR-20b-5p, miR-10b-3p, miR-141-3p, miR-2285aa, miR-542-5p, miR-2355-5p, miR-574-5p, miR-25-3p, miR-769, miR-300-3p, miR-370-5p, miR-2332, miR-204-5p, miR-28-5p, miR-592, miR-6128, miR-193a-5p, miR-3607-3p, miR-16-5p, miR-378c, miR-93, novel\_23, miR-145a-5p, miR-22-3p, miR-2113, miR-181a-5p, miR-223-3p, miR-708-3p, miR-7862, miR-4508, miR-497-5p, miR-381-5p, miR-21-5p, miR-380-3p, miR-16b, miR-487b-3p, miR-665, miR-122-3p, miR-31-5p, miR-20b, miR-2355-3p, miR-411-5p, miR-17-5p, miR-106a-5p, miR-32, miR-466f-3p, miR-1343-5p, miR-378a-5p, miR-363-5p, miR-2483-5p, let-7j, miR-150-5p, miR-195a-5p, miR-505-3p, miR-378f, miR-2284e, miR-7-1-3p, miR-26b-5p, miR-216b-3p, miR-181b-3p, miR-677, miR-669, novel\_69, miR-411b-3p, miR-2404, miR-16a, miR-20a-5p, miR-28c, miR-15a, miR-656-5p, miR-203b-5p, miR-206, miR-92a-3p, miR-1193, miR-2285x, miR-342-3p, novel\_120, miR-326-3p, novel\_27, miR-371b-3p, miR-211, miR-378a-3p, miR-124-3p, miR-376a-5p, miR-378i, miR-218-1-3p, miR-4429, miR-941, miR-493-3p, miR-505-3p, miR-106a, miR-548e-3p, novel\_83, miR-340-5p, miR-15a-5p, miR-222-5p, miR-7859, miR-422a, miR-185-3p, miR-216a-5p, miR-208b-3p, miR-618, miR-26a-5p, miR-30d, miR-760-3p, miR-106a, miR-20a, miR-369-3p, miR-380-3p, miR-181b-1-3p, miR-130a-5p, miR-29b-1-5p, miR-376a-5p, miR-30d-5p, miR-433-3p, miR-655, miR-186-5p, miR-582-5p, miR-1827, miR-543-3p, miR-552-3p, miR-532-5p, miR-370-5p, miR-216b-3p, miR-548c-3p, miR-545-3p, miR-

miR-181b-2-3p, miR-548w, miR-455-3p, miR-9788-3p, miR-153, miR-125b-2-3p, miR-484, miR-296-5p, miR-541, miR-1839-5p, miR-101c, miR-1388-5p, miR-544a, miR-33a-5p, let-7a-5p, miR-124a, miR-2310, miR-30c-1-3p, miR-182-5p, miR-320b, miR-146b, miR-153-3p, let-7e, miR-499b-5p, miR-20a-3p, let-7d-5p, miR-378g, miR-381-3p, miR-129b-5p, miR-361-3p, miR-9-3p, miR-9-5p, miR-2447, miR-541-3p, miR-423-5p, miR-8095, miR-7705, miR-361-3p, miR-2285y, miR-2440, miR-101-3p, miR-490-5p, miR-3968, miR-3600, miR-383-5p, miR-487a-3p, miR-200b, miR-2904, miR-124-3p, miR-5703, miR-1961, miR-376a-5p, miR-16-1-3p, miR-34a-5p, miR-4429, novel\_73, miR-216c-5p, miR-2411, miR-146a-5p, miR-376a-5p, miR-181b-1-3p, miR-130a-5p, miR-185-3p, miR-125b, miR-345-3p, miR-92a-1-5p, miR-2285p, miR-221-5p, miR-34b-5p, miR-2484, let-7k, miR-320d, miR-98-5p, miR-182-5p, miR-140-5p, miR-221-5p, miR-30c-1-3p, miR-548o-3p, miR-204-3p, novel\_32, miR-155-5p, miR-877-5p, let-7i-5p, miR-544-3p, miR-377-3p, miR-216b-5p, miR-6130, miR-129b-3p, miR-186-5p, miR-345-5p, miR-665-5p, let-7b, miR-3184-3p, miR-4510, let-7b-5p, miR-3184-5p, miR-6134, miR-19b-1-5p, miR-29b-2-5p, let-7f, miR-4492, miR-155-5p, miR-6516-3p, miR-17-3p, miR-26b-3p, miR-340-3p, miR-31-5p, miR-544b, miR-432-5p, let-7g-5p, miR-134-3p, miR-432, miR-708-3p, miR-19b-2-5p, miR-7b-5p, miR-21-5p, miR-219a-1-3p, miR-16-1-3p, miR-382, miR-539-3p, let-7j, miR-345-5p, miR-432-3p, miR-432-3p, miR-22841, miR-197-5p, miR-2411-3p, miR-7-5p, miR-146a, miR-377-3p, miR-125a-5p, miR-124-5p, miR-378b, miR-320c, miR-677, miR-181b-3p, miR-34b, miR-21c, miR-146b-5p, miR-2319a, miR-135b-5p, miR-6516-3p, miR-376a-2-5p, let-7e-5p, miR-17-3p, novel\_101, miR-1a-1-5p, miR-449a, miR-2428, miR-3959-3p, miR-34c, miR-382-5p, let-7i, miR-1324, miR-28c, miR-656-5p, miR-625-3p, miR-203b-5p, miR-147-

miR-18a-3p, miR-106a, novel\_73, miR-19b-3p, miR-2284u, miR-362-3p, miR-193b-5p, miR-376a-5p, miR-124-3p, miR-5703, miR-125b-2-3p, miR-130a-5p, miR-143-3p, miR-20a, miR-2887, miR-106a, miR-466i-5p, miR-3653-3p, miR-221-5p, miR-21-3p, miR-125b, miR-377-3p, miR-10a, miR-6130, miR-22-3p, miR-204-3p, miR-221-5p, miR-30c-1-3p, miR-504-5p, miR-370-5p, novel\_107, miR-3065-3p, miR-552-3p, miR-1827, miR-186-5p, miR-21a-3p, miR-450a-1-3p, miR-129b-3p, miR-769-5p, miR-6525, miR-10b-5p, miR-590-3p, miR-539-5p, miR-145a-3p, miR-4510, miR-450b-3p, miR-17-3p, miR-487a-5p, miR-190a-5p, miR-4492, miR-147a, miR-362-3p, miR-329-3p, miR-484, miR-296-5p, miR-4791, miR-10b, miR-301b-5p, miR-501-3p, miR-30b-3p, miR-30c-1-3p, miR-8485, miR-124a, miR-1388-3p, miR-382-3p, miR-106a-5p, miR-376b, miR-2284b, miR-744-3p, miR-3085-3p, novel\_124, miR-487b-5p, miR-25-5p, miR-381-5p, miR-342, miR-5126, miR-326, miR-362-3p, miR-106b-5p, miR-378g, miR-489, miR-500-3p, miR-4443, miR-3064-5p, miR-2284g, miR-4792, miR-20a-3p, miR-10b, miR-7977, miR-504, miR-361-3p, miR-140-5p, miR-877-3p, miR-361-3p, miR-502-3p, miR-2447, miR-499a-5p, miR-628-3p, miR-335, miR-2284q, miR-769-5p, miR-301a-5p, miR-505-5p, miR-545-5p, miR-450a-1-3p, novel\_121, miR-10a-5p, miR-3591-5p, miR-330-5p, miR-501-3p, miR-200a, miR-2284y, miR-3065-3p, miR-2284a, miR-3064-5p, miR-4286, miR-2898, miR-17-3p, novel\_127, miR-2285af, miR-30c-2-3p, miR-300-3p, miR-769, miR-542-5p, miR-2285aa, miR-615-5p, miR-125a, miR-10b-3p, miR-329a, miR-20b-5p, miR-376c-5p, miR-671-5p, miR-1248, miR-485-5p, miR-93-5p, miR-376c-5p, miR-17-5p, miR-3154, miR-93, miR-2903, miR-365a-5p, miR-2433, miR-370-5p, miR-125b-5p, miR-3535, miR-185-5p, miR-134-3p, miR-194-3p, miR-20b, miR-665, miR-30b-3p, miR-381-5p, miR-744-5p, miR-22-3p, miR-450c-3p, let-7i, miR-363-5p, miR-378a-5p, miR-125a-

miR-2284h-5p, miR-18a-3p, miR-133a-3p, miR-378i, miR-378a-3p, miR-376c-3p, miR-143-3p, miR-380-3p, miR-2285w, miR-345-3p, miR-92a-1-5p, miR-422a, miR-500a-5p, miR-301a-3p, miR-499b-3p, miR-376e-3p, miR-15b-5p, miR-504-5p, miR-296-3p, miR-345-5p, miR-339b, miR-186-5p, miR-1827, miR-411, miR-129b-3p, miR-224-5p, miR-181c-5p, miR-3184-5p, miR-590-3p, miR-214, novel\_74, miR-130b-5p, miR-454-3p, miR-1468-5p, miR-664a-5p, miR-147a, miR-421, miR-1185-3p, miR-455-3p, miR-548w, miR-199b-3p, miR-1343-3p, novel\_78, miR-1388-5p, miR-323b, miR-378d, miR-8485, miR-487b-5p, miR-130b-3p, miR-214-3p, miR-146b, miR-199a-3p, miR-16b, miR-323b-3p, miR-29b-1-5p, miR-499a-3p, miR-1185-2-3p, miR-4443, miR-2319b, miR-2285u, miR-504, miR-9-3p, miR-493-5p, miR-140-5p, miR-423-5p, miR-499a-5p, miR-490-5p, miR-2440, miR-615, miR-218-5p, miR-322-5p, novel\_121, miR-2284z, miR-134-5p, miR-6517, novel\_79, miR-196a-5p, miR-2285b, novel\_39, miR-127-5p, novel\_127, miR-125a-3p, miR-30f, miR-376c-3p, miR-125a, miR-542-5p, miR-2285aa, miR-345-5p, miR-16-5p, miR-193a-5p, novel\_9, miR-134-5p, miR-125b-5p, miR-6740-5p, miR-3431, miR-31-5p, miR-339-5p, miR-16b, miR-497-5p, miR-7b-5p, miR-542-3p, miR-708-3p, novel\_23, miR-432-3p, let-7a-2-3p, miR-493-5p, let-7f-2-3p, let-7f-2-3p, miR-668-3p, miR-196b-5p, miR-296-3p, miR-146a, miR-7-5p, miR-2411-3p, miR-105-5p, miR-365b-5p, miR-374c-3p, miR-411b-3p, miR-320c, miR-144-3p, novel\_68, miR-3120-3p, miR-378f, miR-146b-5p, miR-3065-5p, miR-301b-3p, miR-29c-3p, miR-29a, miR-379-3p, miR-576-3p, miR-142b, miR-4324, miR-340-5p, miR-222-5p, miR-15a-5p, miR-199a-3p, miR-505-3p, miR-19b-3p, miR-4429, miR-376a-5p, miR-1193, miR-188-3p, miR-5703, miR-125b-2-3p, miR-29b-1-5p, miR-146a-5p, miR-2411, miR-2432, miR-216c-5p, miR-5100, miR-466i-5p, miR-320d, miR-21-3p, miR-221-5p, miR-125b, miR-322-5p, miR-4792, miR-504-5p, miR-3065-3p, miR-2285aa, miR-10a-5p, miR-10a, miR-193b-3p, miR-6535, miR-15b-5p, miR-1306, miR-3065-5p, miR-18a-3p, miR-216a-3p, miR-3963, miR-412-3p, miR-504, miR-9851-3p, miR-195a-5p, miR-1983, miR-135a-2-3p, miR-16-5p, miR-193b-3p, miR-10b-5p, miR-1197-3p, novel\_82, miR-15a, miR-576-3p, miR-16a, miR-424-5p, miR-18a-3p, miR-548e-3p, novel\_4, miR-412, miR-412-5p, miR-322-5p, miR-7859, miR-15a-5p, miR-9788-3p, miR-2300b-3p, miR-10b, miR-412-3p, miR-16b, miR-142-3p, miR-497-5p, miR-128-3p, miR-378d, miR-10a-5p, miR-424-5p, miR-2478, miR-3065-3p, miR-664-3p, miR-1306-5p, miR-16b, miR-193a-3p, novel\_127, miR-664-3p, miR-503-5p, miR-29b-2-5p, miR-665, miR-29b-1-5p, novel\_127, miR-4492, miR-503-5p, miR-329a-5p, miR-124a, miR-1296-5p, miR-29b-2-5p, miR-1197-3p, miR-29b-1-5p, miR-2284w, miR-338-3p, miR-4532, miR-296-5p, miR-18a-3p, miR-124-3p, miR-2904, miR-9851-3p, miR-874-3p, miR-329-5p, miR-2300a-5p, miR-18a-3p, miR-664b, miR-532-5p, miR-126b-5p, miR-503-5p

|        |                                            |                                                                                                                                                                                                                                                                                                                                                                                                                                                                                                                                                                                                                                                                                                                                                                                                                                                                                                                                                                                                                                                                                                                                                                                                                                                                                                                                                                                                                                                                                                                                                                                                                                                                                                                                                                                                                                                                                                                                                                                                                                                                                                                                                                                                                                                                                                                                   |
|--------|--------------------------------------------|-----------------------------------------------------------------------------------------------------------------------------------------------------------------------------------------------------------------------------------------------------------------------------------------------------------------------------------------------------------------------------------------------------------------------------------------------------------------------------------------------------------------------------------------------------------------------------------------------------------------------------------------------------------------------------------------------------------------------------------------------------------------------------------------------------------------------------------------------------------------------------------------------------------------------------------------------------------------------------------------------------------------------------------------------------------------------------------------------------------------------------------------------------------------------------------------------------------------------------------------------------------------------------------------------------------------------------------------------------------------------------------------------------------------------------------------------------------------------------------------------------------------------------------------------------------------------------------------------------------------------------------------------------------------------------------------------------------------------------------------------------------------------------------------------------------------------------------------------------------------------------------------------------------------------------------------------------------------------------------------------------------------------------------------------------------------------------------------------------------------------------------------------------------------------------------------------------------------------------------------------------------------------------------------------------------------------------------|
| NKAIN3 | ENSOARGO(Na <sup>+</sup> /K <sup>+</sup> t | <p>miR-339-5p, miR-3431, miR-411-5p, miR-2355-3p, miR-1285, miR-30b-3p, miR-21-5p, miR-125b-1-3p, miR-27b-3p, miR-2284x, miR-130b-5p, miR-2284l, miR-296-3p, miR-296-3p, miR-146a, miR-3141, miR-197-5p, novel_51, miR-660, miR-452-5p, miR-329-5p, miR-378b, miR-2404, miR-299b-3p, miR-3141, miR-3970, miR-146b-5p, miR-505-3p, miR-376a-3p, miR-335-5p, miR-17-3p, miR-326-3p, miR-2284w, miR-33a-3p, novel_1, miR-299a-3p, miR-2285ad, miR-196a-2-3p, novel_79, miR-758-5p, miR-3591-5p, miR-330-5p, miR-200a, miR-2285b, miR-192-3p, miR-125a-3p, miR-30c-2-3p, miR-339a, miR-17-3p, miR-598-3p, miR-10b-3p, miR-10a-3p, miR-485-5p, miR-1814c, miR-374a-3p, miR-2284k, miR-374b-3p, miR-409b, miR-2300a-5p, miR-27a-3p, miR-147a, miR-455-3p, miR-301b-5p, miR-541, miR-30b-3p, miR-101c, miR-382-3p, let-7c-3p, miR-30c-1-3p, miR-2310, miR-326, miR-505, miR-146b, miR-214-3p, miR-203-3p, miR-27a-3p, miR-361-3p, miR-381-3p, novel_94, miR-541-3p, novel_111, miR-101-3p, miR-2285y, miR-301a-5p, miR-628-3p, miR-335, miR-374a-3p, miR-7134-3p, miR-1b-3p, miR-505-3p, miR-2300b-3p, miR-2366, miR-193b-5p, miR-98-3p, miR-1197-5p, let-7a-3p, miR-10a-3p, miR-329a-5p, miR-369-3p, miR-130a-5p, miR-146a-5p, miR-143-3p, miR-500a-5p, miR-2284m, miR-466i-5p, miR-3653-3p, miR-21-3p, miR-299-3p, miR-30c-1-3p, miR-660-5p, miR-6130, miR-216b-5p, let-7f-1-3p, miR-129b-3p, miR-598-3p, let-7g-3p, miR-339b, miR-1895, novel_99, miR-4510, miR-214, miR-3074-2-3p, miR-98-3p, let-7b-3p, miR-3604, novel_74, miR-17-3p, miR-4492, miR-130b-5p</p> <p>miR-107-5p, miR-29b-3p, miR-382-3p, miR-5100, miR-370-5p, miR-2440, miR-190a-5p, miR-487a-5p, miR-204-5p, miR-4726-5p, miR-29a, miR-2285f, miR-452-5p, novel_101, miR-29c-3p, miR-190b-5p, miR-2285x, miR-1193, miR-342-3p, miR-1285-5p, miR-1197-3p, miR-411, miR-146b-5p, novel_94, miR-376a-2-5p, miR-2474, miR-2312, miR-2285k, miR-3065-3p, miR-499b-5p, miR-370-5p, miR-296-3p, miR-7-1-3p, miR-664b, miR-20a-3p, miR-29a-3p, miR-374c-3p, miR-190a, miR-216a-5p, miR-92a-1-5p, miR-217, miR-342, miR-146a, miR-664-3p, novel_103, miR-296-3p, miR-146b, miR-103a-2-5p, miR-195a-3p, miR-376b, miR-33a-5p, miR-3065-3p, miR-146a-5p, miR-296-3p, miR-2285i, miR-148b-5p, miR-29d-3p, miR-217-5p, miR-29b, miR-582-3p, miR-376a-5p, miR-409b, miR-6238</p> |
| HMGCR  | ENSOARGO(3-hydrox                          |                                                                                                                                                                                                                                                                                                                                                                                                                                                                                                                                                                                                                                                                                                                                                                                                                                                                                                                                                                                                                                                                                                                                                                                                                                                                                                                                                                                                                                                                                                                                                                                                                                                                                                                                                                                                                                                                                                                                                                                                                                                                                                                                                                                                                                                                                                                                   |

miR-1260b, miR-93, miR-1306-5p, miR-3607-3p, miR-767-5p, miR-486b-3p, miR-29b-3p, novel\_63, miR-3969, miR-100-3p, miR-331-3p, miR-125b-5p, miR-769, miR-374c-3p, miR-376c-3p, miR-574-5p, miR-125a, miR-1271, miR-370-3p, miR-2355-5p, miR-345-5p, miR-2318, miR-767, miR-7144-5p, miR-376c-5p, miR-20b-5p, miR-30e-5p, miR-320a, miR-376c-5p, miR-17-5p, miR-3154, miR-93-5p, miR-450b-5p, miR-2284a, miR-1271-3p, miR-1957a, novel\_39, miR-3065-3p, miR-29a-5p, miR-3529-3p, miR-181a-2-3p, miR-3064-5p, miR-200c-3p, miR-127-5p, miR-181b-5p, miR-543-5p, miR-6119-5p, miR-200c, miR-205-5p, miR-1260a, miR-30f, miR-758-5p, miR-24-2-5p, miR-486-5p, miR-129-1-3p, miR-429-3p, miR-299a-3p, miR-7641, miR-1224-5p, miR-105-2, miR-128-3p, miR-200b-3p, miR-3578, miR-345-3p, miR-30a-5p, miR-330-5p, miR-501-3p, miR-29d-3p, miR-24-3p, miR-323c, miR-2284w, miR-2428, miR-326-3p, miR-335-5p, miR-495-3p, miR-29c-3p, novel\_1, miR-29a, miR-625-3p, miR-576-3p, miR-20a-5p, miR-4324, miR-299b-3p, miR-411b-3p, miR-374c-3p, miR-29a-3p, miR-181b-3p, miR-677, miR-320c, miR-329-5p, novel\_68, miR-19a-3p, miR-2319a, miR-376b-5p, miR-3065-5p, miR-216a-3p, miR-1306, miR-432-3p, miR-2285r, miR-432-3p, miR-345-5p, let-7j, miR-6240, miR-668-3p, miR-124-5p, miR-125a-5p, miR-17-5p, miR-106a-5p, miR-2411-3p, miR-330-3p, miR-105-5p, miR-2355-3p, miR-20b, miR-187-3p, miR-3955-5p, miR-1260b, miR-16-1-3p, miR-29b, miR-181a-5p, miR-653, miR-3071-5p, miR-22-3p, miR-6525, miR-769-5p, miR-181c-5p, miR-3184-5p, miR-3184-3p, miR-129-2-3p, miR-4510, miR-214, miR-6516-3p, novel\_74, miR-338-5p, miR-3604, miR-664a-5p, miR-216b-5p, miR-139-5p, miR-6130, miR-376e-3p, miR-22-3p, miR-204-3p, miR-504-5p, miR-182-5p, miR-216b-3p, miR-3065-3p, miR-345-5p, let-7g-3p, novel\_99, miR-186-5p, miR-21a-3p, miR-30d-5p, miR-376c-3p, miR-181b-1-3p, miR-125b-2-3p, miR-421-

miR-668-5p, miR-493-5p, novel\_94, miR-1983, miR-381-3p, miR-378j, miR-129b-5p, miR-378g, miR-203-3p, miR-541-5p, miR-3958-3p, miR-4726-5p, miR-2284q, miR-2285n, miR-2285y, miR-107-5p, novel\_111, miR-8095, miR-452-5p, miR-9-5p, miR-544a, miR-101a-5p, miR-2284aa, miR-16-2-3p, miR-6529a, miR-2320-3p, miR-421, miR-2285e, miR-199b-3p, miR-330-3p, miR-145b, miR-130b-3p, miR-146b, miR-103a-2-5p, miR-199a-3p, miR-320b, novel\_115, miR-8485, miR-2330-5p, let-7c-3p, miR-652-5p, miR-30f, miR-18a-5p, let-7f-1-3p, miR-2285c, miR-30d-5p, miR-544-3p, miR-301a-3p, miR-216b-5p, miR-6130, miR-877-5p, miR-155-5p, miR-496-3p, miR-548o-3p, miR-660-5p, miR-21-3p, miR-155-5p, miR-17-3p, miR-454-3p, let-7b-3p, miR-2285j, miR-30e-3p, miR-30a-3p, miR-665, miR-224-5p, miR-98-3p, miR-4510, miR-19b-3p, miR-4429, let-7a-3p, miR-361-5p, miR-34a-5p, miR-376a-5p, miR-98-3p, miR-140-3p, miR-487a-3p, miR-7859, miR-200b, miR-199a-3p, miR-548e-3p, miR-3600, miR-485-3p, miR-30d-3p, miR-320d, miR-2284m, miR-30d, miR-34b-5p, miR-3653-3p, miR-1277-5p, miR-618, miR-345-3p, miR-125b-2-3p, miR-146a-5p, miR-412-3p, miR-19a-3p, miR-146b-5p, miR-376a-2-5p, miR-18b, miR-3970, miR-3591-3p, miR-3065-5p, miR-216a-3p, miR-34b, miR-320c, miR-7-1-3p, miR-6119-3p, miR-199c, miR-34c, miR-449a, miR-2284w, miR-301b-3p, miR-135a-2-3p, miR-219b-3p, miR-495-3p, miR-17-3p, miR-2285x, miR-188-5p, miR-145a-5p, miR-2285g, miR-412-5p, miR-134-3p, miR-3431, miR-544b, miR-665, miR-130a-3p, miR-452-5p, miR-660, miR-466f-3p, miR-224-5p, miR-146a, miR-330-3p, miR-2411-3p, miR-493-5p, miR-6240, miR-2483-5p, miR-3074-1-3p, miR-488-3p, miR-30e-5p, miR-320a, miR-18a, miR-34c-5p, miR-2284n, miR-503-3p, miR-2285aa, miR-141-3p, miR-135a-1-3p, miR-2332, miR-128-3p, miR-200b-3p, miR-155-5p, miR-496, miR-345-3p, miR-30a-5p, miR-9-5p, miR-2284z, miR-2285ad, miR-499-3p, miR-7641, miR-1224-

miR-877-5p, let-7i-5p, miR-15b-5p, miR-6130, miR-10a, miR-499b-3p, miR-2284s, miR-548o-3p, miR-504-5p, miR-140-5p, miR-545-3p, miR-1827, miR-186-5p, miR-339b, miR-18a-5p, miR-129b-3p, miR-6134, let-7b-5p, miR-224-5p, miR-6525, miR-10b-5p, miR-4510, miR-129-2-3p, let-7b, miR-539-5p, miR-130b-5p, miR-424-5p, miR-487a-5p, miR-129-5p, miR-6516-3p, miR-665, miR-664a-5p, miR-29b-2-5p, miR-19b-1-5p, miR-151-3p, let-7f, miR-328-3p, miR-15a-5p, miR-222-5p, miR-200b, novel\_73, miR-1197-5p, miR-2300b-3p, miR-1961, miR-2411, miR-664b-3p, miR-369-3p, miR-216c-5p, let-7k, miR-30b-3p, miR-98-5p, miR-216a-5p, novel\_17, miR-26a-5p, miR-27a-3p, miR-203-3p, let-7d-5p, miR-499a-3p, miR-541-5p, miR-877-3p, miR-493-5p, miR-504, miR-129b-5p, miR-378j, miR-140-5p, miR-361-3p, miR-3059-5p, miR-4726-5p, novel\_82, miR-9788-3p, miR-455-3p, miR-147a, miR-153, miR-27a-3p, miR-151a-3p, miR-1839-5p, miR-16-2-3p, miR-2284aa, miR-758-3p, miR-10b, miR-491-3p, miR-758-3p, miR-376b, miR-424-5p, let-7a-5p, let-7e, miR-153-3p, miR-491-5p, miR-16b, miR-326, miR-154b-5p, miR-300-3p, miR-2355-5p, miR-1248, miR-329b, miR-2318, miR-876-3p, miR-18a, miR-488-3p, miR-10b-3p, miR-16-5p, miR-592, miR-2332, miR-129-1-3p, novel\_121, miR-214-5p, miR-2284z, miR-483-3p, miR-2411-5p, miR-322-5p, miR-505-5p, miR-18b-5p, novel\_79, miR-429-3p, miR-10a-5p, miR-200b-3p, let-7d, miR-330-5p, miR-1290, miR-2284a, let-7g, miR-450b-5p, miR-29b-2-5p, novel\_96, miR-1a-2-5p, miR-200c-3p, miR-127-5p, let-7f-5p, miR-450a-2-3p, let-7c-5p, miR-339a, miR-200c, miR-6119-5p, miR-10a-5p, miR-26b-5p, miR-655-5p, miR-329-5p, miR-379-5p, miR-6395, miR-195a-5p, let-7e-5p, miR-18b, miR-326-3p, miR-219b-3p, novel\_120, novel\_1, miR-382-5p, let-7i, miR-16a, miR-576-3p, miR-4324, miR-15a, miR-411-5p, let-7g-5p, miR-339-5p, miR-3955-5p, miR-27b-3p, miR-188-5p, miR-497-5p, miR-

FGA            ENSOARGO(fibrinog



miR-9-3p, miR-136-5p, miR-3963, miR-381-3p, miR-129b-5p, miR-1185-2-3p, miR-4443, miR-27a-3p, miR-2483-3p, miR-499a-3p, miR-499b-5p, miR-20a-3p, miR-335, miR-499a-5p, miR-4726-5p, miR-628-3p, miR-301a-5p, miR-101-3p, miR-218-5p, miR-9-3p, novel\_111, miR-877-3p, miR-1296-5p, miR-2285f, miR-885-5p, miR-32-3p, miR-3059-5p, miR-3120-5p, miR-21b, miR-101a-5p, miR-30b-3p, miR-1a-3p, miR-301b-5p, miR-2284r, miR-1185-3p, miR-181b-2-3p, miR-27a-3p, miR-330-3p, miR-105-1, novel\_78, miR-130b-3p, miR-16b, miR-182-5p, miR-29b-1-5p, miR-505, miR-199a-3p, miR-2310, miR-8485, miR-30c-1-3p, miR-652-5p, miR-33a-5p, let-7c-3p, miR-494-3p, miR-101b-3p, miR-424-5p, miR-1388-3p, novel\_99, miR-1827, miR-186-5p, miR-2312, let-7g-3p, miR-411, miR-433-3p, miR-3613-5p, miR-15b-5p, miR-877-5p, miR-499b-3p, miR-301a-3p, miR-377-3p, miR-182-5p, miR-552-3p, miR-216b-3p, miR-32-3p, miR-496-3p, miR-30c-1-3p, miR-221-5p, miR-130b-5p, miR-669a-3p, miR-208b-5p, miR-424-5p, miR-454-3p, miR-129-5p, miR-664a, miR-6516-3p, novel\_74, miR-29b-2-5p, miR-338-5p, miR-3604, miR-132-5p, miR-30a-3p, miR-30e-3p, miR-206-3p, miR-6525, miR-3074-2-3p, miR-433-5p, miR-361-5p, miR-16-1-3p, miR-218-1-3p, miR-142-3p, miR-19b-3p, miR-33b-3p, miR-217-5p, miR-140-3p, miR-2904, miR-2300b-3p, miR-2408, novel\_133, miR-199a-3p, miR-148b-3p, miR-340-5p, miR-15a-5p, miR-200b, miR-222-5p, miR-383-5p, miR-30d-3p, miR-18a-3p, miR-1277-5p, miR-221-5p, miR-202-5p, miR-92a-1-5p, miR-345-3p, miR-143-3p, miR-2411, miR-2432, miR-181b-1-3p, miR-29b-1-5p, miR-195a-3p, miR-329a-5p, miR-195a-5p, miR-6516-3p, miR-19a-3p, miR-18a-3p, miR-378b, miR-3970, miR-150-5p, miR-148a-3p, miR-2387, miR-2285ab, miR-181b-3p, miR-677, miR-411b-3p, miR-146b-3p, miR-3120-3p, miR-329-5p, miR-22-5p, miR-206, miR-16a, miR-133a-5p, miR-6529b, miR-15a, miR-3613, miR-2428, miR-301b-3p, miR-411-3p, miR-34a-5p, miR-194-5p, miR-411, miR-34c-5p, miR-34b, miR-431, miR-379-3p, miR-34b-5p, miR-431-5p, miR-2440, miR-34c, miR-194a, miR-449a, miR-1388-3p, miR-194b-5p, miR-145-3p, miR-500b-5p, miR-129-5p, miR-17-3p, miR-30a-3p, miR-125b-5p, miR-665, miR-30e-3p, miR-374c-3p, miR-21-3p, miR-125a, miR-543-3p, miR-339b, miR-137-3p, miR-362-5p, miR-503-3p, miR-200a, miR-130a-5p, miR-30a-3p, miR-181a-2-3p, miR-345-3p, miR-107, miR-17-3p, miR-500a-5p, miR-339a, miR-125b, miR-217, miR-205-5p, miR-582-3p, miR-199a-3p, miR-487a-3p, novel\_79, miR-7641, miR-30d-3p, miR-217-5p, miR-23b-5p, miR-2300b-3p, miR-362-5p, miR-3957-3p, miR-17-3p, miR-136-3p, miR-6123, miR-502b, miR-382-3p, miR-133a-5p, miR-2404, miR-374c-3p, miR-2285u, miR-320b, miR-20a-3p, miR-335-3p, miR-107, miR-1306, miR-3591-3p, miR-378b, miR-125a-5p, miR-124-5p, miR-136-3p, novel\_51, miR-199a-3p, miR-1306-5p, miR-500-5p, miR-455-3p, miR-103, miR-3431, miR-339-5p, miR-665, miR-222-5p, miR-31-5p, novel\_78, miR-103a-3p, miR-188-5p, miR-16-1-3p, miR-6529a, miR-143-5p, miR-499a-3p, miR-499b-3p, miR-378g, miR-134-3p, miR-199a-5p, miR-199a-5p, miR-199b-5p, miR-296-3p, miR-181a-2-3p, miR-199b-5p, miR-210-5p, miR-199b-5p, miR-197-3p, miR-23b-5p, miR-92a-1-5p

miR-31-5p, miR-194-3p, miR-544b, miR-3431, miR-503-5p, miR-22-3p, miR-3071-5p, miR-145a-5p, miR-1285, miR-26a-2-3p, miR-130b-5p, miR-345-5p, miR-654-3p, miR-105-5p, miR-224-5p, miR-503-5p, miR-1343-5p, miR-378a-5p, miR-7-1-3p, miR-3120-3p, miR-329-5p, miR-677, miR-181b-3p, novel\_69, miR-374c-3p, miR-3065-5p, miR-2387, miR-18b, miR-2285x, miR-219b-3p, miR-1a-1-5p, novel\_27, miR-142b, miR-203b-5p, miR-656-5p, miR-206, miR-1224-5p, miR-18b-5p, miR-2285ad, miR-6517, miR-429-3p, miR-134-5p, miR-129-1-3p, miR-218-2-3p, miR-1343-5p, miR-501-3p, miR-30a-5p, miR-1290, miR-134, miR-155-5p, miR-105-2, miR-200b-3p, miR-496, miR-1, miR-29a-5p, miR-450b-5p, miR-24-2-5p, miR-2478, miR-205-5p, miR-200c, miR-450a-2-3p, miR-200c-3p, miR-1a-2-5p, miR-503-3p, miR-374c-3p, miR-362-5p, miR-18a, miR-30e-5p, miR-503-3p, miR-1814c, miR-1248, miR-345-5p, miR-329a, miR-6128, miR-500b-5p, miR-1-5p, miR-410-5p, miR-5100, miR-592, miR-134-5p, miR-5010-3p, miR-145b, miR-181b-2-3p, miR-222-5p, miR-1343-3p, miR-105-1, miR-500-5p, miR-455-3p, miR-1185-3p, miR-2320-3p, miR-501-3p, miR-1a-3p, miR-758-3p, miR-484, miR-329-3p, miR-541, miR-101c, miR-1388-5p, miR-362-3p, miR-101a-5p, miR-544a, miR-1388-3p, miR-758-3p, miR-1b-5p, miR-2310, miR-362-3p, miR-214-3p, miR-3955-3p, miR-7689-3p, miR-139-5p, miR-24-1-5p, miR-2319b, miR-500-3p, miR-1185-2-3p, miR-541-3p, miR-502-3p, miR-362-5p, novel\_111, miR-2285y, miR-30b-5p, miR-101-3p, miR-200b, miR-2904, miR-188-3p, novel\_133, miR-362-3p, miR-133a-3p, miR-664-5p, miR-329a-5p, miR-503-5p, miR-181b-1-3p, miR-130a-5p, miR-30b, miR-21-3p, miR-466i-5p, miR-532-5p, miR-496-3p, miR-22-3p, miR-155-5p, miR-544-3p, miR-139-5p, miR-655, miR-30d-5p, miR-21a-3p, miR-186-5p, miR-1827, miR-18a-5p, miR-30f, miR-345-5p, miR-214 miR-129-2-3p miR-6525 miR-224-5p miR-246 miR-206- miR-6516, miR-6516-5p, miR-3082-5p, miR-299b-3p, miR-669, miR-216a-3p, miR-299a-3p, miR-140-5p, miR-370-5p, miR-7977, miR-450b-5p, miR-1814c, miR-873a-5p, miR-19b-2-5p, miR-877-3p, miR-2310, miR-3529-3p, miR-29b-2-5p, miR-1193, miR-3074-2-3p, miR-760-3p, novel\_9, miR-664a, miR-6516-3p, miR-129-5p, miR-299-3p, miR-370-5p, miR-19b-1-5p, miR-29b-2-5p, miR-199b-5p, miR-221-5p, miR-320d, miR-450a-2-3p, miR-29b-1-5p, miR-1306-5p, miR-30b, miR-320b, miR-490-3p, miR-1b-5p, miR-199a-5p, novel\_39, miR-2432, miR-2424, miR-3065-3p, miR-29b-1-5p, miR-652-5p, miR-4429, miR-885-3p, miR-30a-5p, miR-181a-5p, miR-30c-5p, miR-328-3p, miR-210-3p, miR-505-5p, miR-151a-3p, miR-4492, miR-6119-3p, miR-409-3p, miR-6740-5p, miR-151-3p, miR-5100, miR-30b-5p, miR-199b-5p, miR-7705, miR-2428, novel\_27, miR-423-5p, miR-3184-5p, novel\_111, miR-346, miR-665-5p, miR-3059-5p, miR-6395, novel\_99, miR-885-3p, miR-2318, miR-136-5p, miR-3065-5p, miR-320a, miR-129b-5p, miR-30d-5p, miR-1306, miR-199b-5p, miR-30e-5p, miR-199a-5p, novel\_32, miR-320c, miR-7-1-3p, miR-3065-3p, miR-221-5p

SPATA22 ENSOARGO( spermato.5p, miR-1-5p, miR-410-5p, miR-5100, miR-592, miR-134-5p, miR-5010-3p, miR-145b, miR-181b-2-3p, miR-222-5p, miR-1343-3p, miR-105-1, miR-500-5p, miR-455-3p, miR-1185-3p, miR-2320-3p, miR-501-3p, miR-1a-3p, miR-758-3p, miR-484, miR-329-3p, miR-541, miR-101c, miR-1388-5p, miR-362-3p, miR-101a-5p, miR-544a, miR-1388-3p, miR-758-3p, miR-1b-5p, miR-2310, miR-362-3p, miR-214-3p, miR-3955-3p, miR-7689-3p, miR-139-5p, miR-24-1-5p, miR-2319b, miR-500-3p, miR-1185-2-3p, miR-541-3p, miR-502-3p, miR-362-5p, novel\_111, miR-2285y, miR-30b-5p, miR-101-3p, miR-200b, miR-2904, miR-188-3p, novel\_133, miR-362-3p, miR-133a-3p, miR-664-5p, miR-329a-5p, miR-503-5p, miR-181b-1-3p, miR-130a-5p, miR-30b, miR-21-3p, miR-466i-5p, miR-532-5p, miR-496-3p, miR-22-3p, miR-155-5p, miR-544-3p, miR-139-5p, miR-655, miR-30d-5p, miR-21a-3p, miR-186-5p, miR-1827, miR-18a-5p, miR-30f, miR-345-5p, miR-214

PDE1A ENSOARGO( phosphod 5p, miR-129-2-3p, miR-6525, miR-224-5p, miR-246, miR-206- miR-6516, miR-6516-5p, miR-3082-5p, miR-299b-3p, miR-669, miR-216a-3p, miR-299a-3p, miR-140-5p, miR-370-5p, miR-7977, miR-450b-5p, miR-1814c, miR-873a-5p, miR-19b-2-5p, miR-877-3p, miR-2310, miR-3529-3p, miR-29b-2-5p, miR-1193, miR-3074-2-3p, miR-760-3p, novel\_9, miR-664a, miR-6516-3p, miR-129-5p, miR-299-3p, miR-370-5p, miR-19b-1-5p, miR-29b-2-5p, miR-199b-5p, miR-221-5p, miR-320d, miR-450a-2-3p, miR-29b-1-5p, miR-1306-5p, miR-30b, miR-320b, miR-490-3p, miR-1b-5p, miR-199a-5p, novel\_39, miR-2432, miR-2424, miR-3065-3p, miR-29b-1-5p, miR-652-5p, miR-4429, miR-885-3p, miR-30a-5p, miR-181a-5p, miR-30c-5p, miR-328-3p, miR-210-3p, miR-505-5p, miR-151a-3p, miR-4492, miR-6119-3p, miR-409-3p, miR-6740-5p, miR-151-3p, miR-5100, miR-30b-5p, miR-199b-5p, miR-7705, miR-2428, novel\_27, miR-423-5p, miR-3184-5p, novel\_111, miR-346, miR-665-5p, miR-3059-5p, miR-6395, novel\_99, miR-885-3p, miR-2318, miR-136-5p, miR-3065-5p, miR-320a, miR-129b-5p, miR-30d-5p, miR-1306, miR-199b-5p, miR-30e-5p, miR-199a-5p, novel\_32, miR-320c, miR-7-1-3p, miR-3065-3p, miR-221-5p

SAMHD1 ENSOARGO( SAM doma 5p, miR-129-2-3p, miR-6525, miR-224-5p, miR-246, miR-206- miR-6516, miR-6516-5p, miR-3082-5p, miR-299b-3p, miR-669, miR-216a-3p, miR-299a-3p, miR-140-5p, miR-370-5p, miR-7977, miR-450b-5p, miR-1814c, miR-873a-5p, miR-19b-2-5p, miR-877-3p, miR-2310, miR-3529-3p, miR-29b-2-5p, miR-1193, miR-3074-2-3p, miR-760-3p, novel\_9, miR-664a, miR-6516-3p, miR-129-5p, miR-299-3p, miR-370-5p, miR-19b-1-5p, miR-29b-2-5p, miR-199b-5p, miR-221-5p, miR-320d, miR-450a-2-3p, miR-29b-1-5p, miR-1306-5p, miR-30b, miR-320b, miR-490-3p, miR-1b-5p, miR-199a-5p, novel\_39, miR-2432, miR-2424, miR-3065-3p, miR-29b-1-5p, miR-652-5p, miR-4429, miR-885-3p, miR-30a-5p, miR-181a-5p, miR-30c-5p, miR-328-3p, miR-210-3p, miR-505-5p, miR-151a-3p, miR-4492, miR-6119-3p, miR-409-3p, miR-6740-5p, miR-151-3p, miR-5100, miR-30b-5p, miR-199b-5p, miR-7705, miR-2428, novel\_27, miR-423-5p, miR-3184-5p, novel\_111, miR-346, miR-665-5p, miR-3059-5p, miR-6395, novel\_99, miR-885-3p, miR-2318, miR-136-5p, miR-3065-5p, miR-320a, miR-129b-5p, miR-30d-5p, miR-1306, miR-199b-5p, miR-30e-5p, miR-199a-5p, novel\_32, miR-320c, miR-7-1-3p, miR-3065-3p, miR-221-5p

miR-184-3p, miR-941, miR-493-3p, miR-5703, miR-140-3p, miR-1197-5p, miR-2408, miR-191, novel\_133, miR-532-3p, miR-148b-3p, miR-7859, miR-18a-3p, miR-21-3p, miR-221-5p, miR-324-3p, miR-219b-5p, miR-210-5p, miR-143-3p, miR-625-5p, miR-885-3p, miR-1895, miR-433-3p, miR-877-5p, novel\_32, miR-3065-3p, miR-21-3p, miR-548o-3p, miR-221-5p, miR-669a-3p, miR-874-5p, miR-122-5p, miR-346, miR-6525, miR-2426, miR-30b-3p, miR-501-3p, miR-143-5p, miR-216a-3p, miR-2300a-5p, miR-330-3p, novel\_4, miR-199b-3p, miR-2957, novel\_19, miR-2310, miR-4532, miR-33a-5p, miR-2330-5p, miR-101b-3p, miR-500-3p, miR-3082-5p, miR-378g, miR-7977, miR-541-5p, miR-2285t, miR-335, miR-628-3p, miR-2285y, miR-615, miR-8095, miR-502-3p, miR-361-3p, miR-194b-5p, miR-128-3p, miR-885-3p, miR-501-3p, miR-1343-5p, miR-3578, miR-615-3p, miR-483-3p, miR-505-5p, miR-2285ad, miR-152-3p, novel\_127, miR-1260a, miR-490-3p, novel\_39, miR-3065-3p, miR-1814c, miR-488-3p, miR-300-3p, miR-191-5p, miR-331-3p, miR-551b-3p, miR-2433, miR-1260b, miR-1197-3p, miR-6128, miR-181a-2-3p, miR-188-5p, miR-744-5p, miR-455-5p, miR-1260b, miR-30b-3p, miR-194-5p, miR-7b-5p, miR-542-3p, miR-432, miR-411-5p, miR-149-5p, miR-134-3p, miR-432-5p, miR-340-3p, miR-31-5p, miR-1343-5p, miR-483-3p, miR-378a-5p, miR-194a, miR-455-5p, miR-330-3p, miR-7-5p, miR-432-3p, miR-668-3p, miR-6240, miR-3591-3p, miR-216a-3p, miR-18a-3p, miR-148a-3p, miR-669, miR-320b, novel\_68, miR-199c, miR-128-1-5p, miR-1307-5p, miR-24-3p, miR-323c, miR-495-3p, novel\_101, miR-335-5p

miR-450c-3p, miR-197-3p, miR-873a-5p, miR-223-3p, miR-1434-3p, miR-455-5p, miR-188-5p, miR-7862, miR-665, miR-340-3p, miR-133b-5p, miR-149-5p, novel\_116, miR-20b, miR-412-5p, miR-185-5p, let-7g-5p, miR-330-3p, miR-365b-5p, miR-197-5p, miR-105-5p, miR-106a-5p, novel\_51, miR-455-5p, miR-17-5p, miR-452-5p, miR-1343-5p, miR-124-5p, miR-6240, miR-503-3p, miR-432-3p, miR-2285r, miR-432-3p, miR-150-5p, miR-376b-3p, miR-216a-3p, miR-18a-3p, miR-18b, let-7e-5p, miR-379-5p, miR-412-3p, miR-26b-5p, miR-7-1-3p, miR-3120-3p, novel\_68, miR-6535, miR-323a-5p, miR-146b-3p, miR-299b-3p, miR-411b-3p, let-7i, miR-502-5p, miR-20a-5p, novel\_1, miR-17-3p, novel\_101, novel\_120, miR-1a-1-5p, miR-211, miR-24-3p, miR-371b-3p, miR-7134-5p, miR-1343-5p, miR-128-3p, miR-105-2, let-7d, miR-582-3p, miR-7641, miR-1224-5p, miR-18b-5p, miR-299a-3p, miR-2285ad, miR-6517, miR-450a-1-3p, novel\_121, miR-129-1-3p, miR-302a-5p, miR-505-5p, miR-30c-2-3p, let-7c-5p, miR-376b-3p, miR-2285af, novel\_127, miR-543-5p, miR-450a-2-3p, miR-17-3p, miR-127-5p, let-7f-5p, miR-4286, miR-181a-2-3p, miR-3529-3p, let-7g, miR-200a, miR-29a-5p, miR-450b-5p, miR-93-5p, miR-18a, miR-17-5p, miR-3154, miR-331-5p, miR-20b-5p, miR-7144-5p, miR-671-5p, miR-2355-5p, miR-615-5p, miR-574-5p, miR-874-3p, miR-154b-5p, miR-300-3p, novel\_63, miR-204-5p, miR-331-5p, miR-193a-5p, miR-133a-3p, miR-1306-5p, miR-365a-5p, miR-93, miR-758-3p, miR-6529a, miR-301b-5p, miR-541, miR-450b-5p, miR-222-5p, miR-330-3p, miR-105-1, miR-151a-3p, miR-2459, miR-147a, miR-1298-3p, miR-106b-5p, let-7e, miR-376b, miR-574-3p, let-7a-5p, miR-106a-5p, miR-758-3p, miR-30c-1-3p, miR-409-5p, miR-335-3p, miR-376a-3p, novel\_94, miR-1983, miR-7689-3p, miR-211-5p, miR-203-3p, let-7d-5p, miR-376d, miR-499a-3p, miR-2483-3p, miR-3082-5p, miR-2285v, miR-301a-5p, miR-382-3p, novel\_82, miR-

miR-7-5p, novel\_51, miR-194a, miR-2411-3p, miR-378a-5p, miR-193a-3p, miR-660, miR-1343-5p, miR-382, miR-363-5p, miR-2483-5p, miR-432-3p, miR-2285r, miR-1285, miR-7b-5p, miR-708-3p, miR-194-5p, miR-197-3p, miR-1260b, miR-138, miR-7862, miR-27b-3p, miR-4508, miR-103a-3p, miR-26b-3p, miR-134-3p, miR-103, miR-6238, miR-576-3p, miR-6529b, miR-502-5p, miR-502b, miR-656-5p, miR-219b-3p, miR-17-3p, novel\_101, miR-1193, miR-193b-3p, miR-211, miR-2428, miR-326-3p, miR-148a-3p, miR-18b, miR-2285ab, miR-3591-3p, miR-18a-3p, miR-216a-3p, miR-107, miR-378f, miR-505-3p, miR-10a-5p, miR-3120-3p, miR-670-3p, miR-299b-3p, miR-181b-3p, miR-6535, miR-677, miR-669, miR-1260a, miR-191-3p, miR-17-3p, miR-2898, novel\_96, novel\_127, miR-200a-3p, miR-152-3p, miR-107, miR-3529-3p, miR-181a-2-3p, miR-30a-3p, miR-148b-5p, miR-450b-5p, miR-2478, miR-192-3p, miR-490-3p, miR-3065-3p, miR-345-3p, miR-330-5p, miR-1343-5p, miR-885-3p, miR-10a-5p, miR-128-3p, miR-299a-3p, miR-2285ad, miR-18b-5p, miR-431, miR-378h, miR-370-5p, miR-331-3p, miR-138-5p, miR-204-5p, miR-486b-3p, miR-3432a, miR-1306-5p, miR-103b, miR-3607-3p, miR-1260b, miR-145-3p, miR-378c, miR-488-3p, miR-3154, miR-18a, miR-329b, miR-329a, miR-671-5p, miR-874-3p, miR-3068-3p, miR-1271, miR-615-5p, miR-141-3p, miR-370-3p, miR-2355-5p, miR-324-5p, miR-431-5p, miR-326, miR-323b-3p, miR-505, miR-2957, miR-362-3p, miR-491-5p, miR-214-3p, miR-494-3p, miR-2330-5p, miR-124a, miR-574-3p, miR-33a-5p, miR-652-5p, miR-378d, miR-1b-5p, miR-4532, miR-3187-3p, miR-301b-5p, miR-10b, miR-541, miR-378b, miR-2284r, miR-329-3p, miR-7857, miR-323b, miR-101a-5p, miR-378c, miR-362-3p, miR-2300a-5p, novel\_78, miR-1343-3p, miR-181b-2-3p, miR-222-5p, miR-27a-3p, miR-148b-5p, miR-9788-3p, novel\_82, miR-2285n, miR-301a-5p, miR-371a-5p, miR-2285v, miR-3068, miR-1726-5p, miR-3056-5p, miR-378c, miR-6128, miR-378c, miR-145-3p, miR-1-5p, miR-2285j, miR-3604, miR-592, miR-208b-5p, miR-221-5p, miR-378a-3p, miR-215-5p, miR-141-3p, miR-370-3p, miR-21-3p, miR-139-5p, miR-582-5p, miR-192-5p, miR-499b-3p, miR-301, miR-381-3p, miR-433-3p, miR-411, miR-582-5p, novel\_48, miR-3074-1-3p, miR-3529-3p, miR-2385-3p, miR-148b-5p, miR-2432, miR-664-3p, miR-2285af, miR-422a, miR-500a-5p, miR-1a-2-5p, miR-200a-3p, miR-299-3p, novel\_96, miR-221-5p, miR-299a-3p, miR-1224-5p, miR-3600, miR-378h, novel\_121, miR-3578, miR-215-5p, miR-378i, miR-378a-3p, miR-124-3p, novel\_73, miR-300, miR-411-3p, miR-361-5p, miR-1a-1-5p, miR-219b-3p, miR-3059-5p, miR-452-5p, miR-219a-5p, miR-2285x, miR-1839-3p, miR-7705, miR-2284w, miR-1285-5p, miR-4324, miR-502-5p, miR-371a-5p, miR-379-3p, miR-502b, miR-22-5p, miR-216b-3p, miR-139-5p, miR-489, miR-299b-3p, miR-499a-3p, miR-378e, miR-6535, miR-203-3p, miR-669, miR-3591-3p, miR-3065-5p, miR-378f, miR-6516-3p, miR-1839-3p, miR-494-3p, miR-6240, miR-124a, miR-1388-3p, miR-628-5p, let-7c-3p, miR-2285r, miR-654-3p, miR-378d, miR-2310, miR-758-3p, miR-8485, miR-330-3p, miR-491-5p, miR-466f-3p, miR-153-3p, miR-330-3p, miR-5010-3p, miR-665, miR-1298-3p, miR-3535, miR-153, miR-542-3p, miR-4791, miR-1434-3p, miR-378b, miR-758-3p, miR-125b-2-3p, miR-2426, miR-378c, miR-3120-5p, miR-16-2-3p

|         |                    |                                                                                                                                                                                                                                                                                                                                                                                                                                                                                                                                                                                                                                                                                                                                                                                                                                                                                                                                                                                                                                                                                       |
|---------|--------------------|---------------------------------------------------------------------------------------------------------------------------------------------------------------------------------------------------------------------------------------------------------------------------------------------------------------------------------------------------------------------------------------------------------------------------------------------------------------------------------------------------------------------------------------------------------------------------------------------------------------------------------------------------------------------------------------------------------------------------------------------------------------------------------------------------------------------------------------------------------------------------------------------------------------------------------------------------------------------------------------------------------------------------------------------------------------------------------------|
| CACNA1I | ENSOARGO( calcium  | miR-1307-3p, miR-4286, miR-345-3p, miR-4492, novel_127, miR-615, miR-378g, miR-134-3p, miR-22-3p, novel_121, miR-18a-3p, miR-6517, miR-7977, miR-615-3p, novel_133, miR-2366, miR-22-3p, miR-18a-3p                                                                                                                                                                                                                                                                                                                                                                                                                                                                                                                                                                                                                                                                                                                                                                                                                                                                                   |
| IQGAP2  | ENSOARGO( IQ motif | miR-10b-3p, miR-361-5p, miR-124-3p, miR-664b, miR-5010-3p, miR-1b-3p, miR-7641, miR-17-3p, miR-17-3p, miR-374a-3p, miR-708-5p, miR-28-5p, miR-664-3p, miR-2440, miR-125a-3p, miR-665, miR-374a-3p, miR-124a, miR-17-3p<br>miR-181c-5p, miR-154a, miR-502-3p, miR-877-3p, miR-144-5p, miR-181d-5p, miR-103b, miR-3958-5p, miR-1306-5p, miR-154-3p, miR-129-5p, novel_1, miR-379-3p, miR-767-5p, novel_74, miR-30a-3p, miR-30e-3p, miR-500-3p, miR-1185-2-3p, miR-181b-3p, miR-677, miR-144-5p, miR-2319b, miR-487a-3p, miR-1248, miR-23a-5p, miR-543-3p, miR-3074-1-3p, miR-154b-3p, miR-410-                                                                                                                                                                                                                                                                                                                                                                                                                                                                                          |
| SEMA3C  | ENSOARGO( sema dom | 5p, miR-767, miR-411, miR-381-3p, miR-491-3p, miR-539-3p, miR-296-3p, miR-181b-1-3p, miR-376a-5p, miR-2285r, let-7f-2-3p, let-7f-2-3p, miR-30a-3p, miR-382-3p, miR-487a, miR-1388-3p, miR-181b-5p, miR-500a-5p, miR-296-3p, miR-1185-3p, miR-487a-3p, miR-412-5p, miR-181b-2-3p, miR-1224-5p, miR-300, miR-411-3p, miR-3071-5p, miR-23b-5p, miR-501-3p, miR-501-3p, miR-181a-5p, miR-376a-5p, miR-6529a<br>miR-483-3p, miR-328-3p, miR-129-1-3p, miR-532-3p, miR-582-3p, miR-1247-5p, miR-18a-3p, miR-378d, miR-34a-5p, miR-362-3p, miR-193b-5p, miR-2366, miR-3578, miR-3591-5p, miR-188-3p, miR-1197-5p, miR-2904, miR-92b-3p, novel_39, miR-181b-5p, miR-2898, novel_127, miR-92a-3p, miR-21-3p, miR-221-5p, miR-34b-5p, miR-125a-3p, miR-664-3p, miR-8117, miR-210-5p, miR-185-3p, miR-323-5p, miR-25-3p, miR-193b-3p, miR-34c-5p, miR-132-5p, miR-2284s, novel_25, novel_32, miR-221-5p, miR-32-5p, miR-341-3p, miR-329a, miR-485-5p, miR-1895, miR-543-3p, miR-23a-5p, miR-488-3p, miR-346, miR-2903, miR-6134, miR-181c-5p, miR-10b-3p, miR-3184-5p, miR-181a-2-3p, miR-129-2- |
| TRPV2   | ENSOARGO( transien | 3p, novel_42, miR-1306-5p, miR-214, miR-664a, miR-129-5p, miR-1468-5p, miR-665, miR-331-3p, miR-2300a-5p, miR-1343-3p, miR-30b-3p, miR-362-3p, miR-2889, miR-542-3p, miR-181a-5p, miR-329-3p, miR-296-5p, miR-30b-3p, miR-323b, miR-8485, miR-6412, miR-652-5p, miR-483-3p, miR-193a-3p, miR-214-3p, miR-1468, miR-2331-5p, novel_51, miR-362-3p, miR-32, miR-323b-3p, miR-197-5p, miR-34b, miR-323a-5p, miR-6535, miR-664b, miR-7977, miR-541-5p, miR-668-5p, miR-450b-3p, miR-1291, miR-6395, miR-378j, miR-18a-3p, miR-8095, miR-449a, miR-423-5p, miR-363-3p, miR-135a-2-3p, miR-181d-5p, miR-495-3p, miR-193b-3p, miR-92a-3p, miR-128-1-5p, miR-203b-5p, novel_82, miR-34c                                                                                                                                                                                                                                                                                                                                                                                                       |

SLC41A2 ENSOARGOC solute c:

miR-30d-5p, let-7f-1-3p, miR-450a-1-3p, novel\_99, miR-30f, miR-221-5p, miR-15b-5p, novel\_32, miR-192-5p, let-7b-3p, miR-130b-5p, miR-424-5p, miR-450b-3p, novel\_74, miR-3074-2-3p, miR-3958-5p, miR-1271, miR-539-5p, miR-6134, miR-98-3p, miR-1434-5p, miR-140-3p, miR-98-3p, miR-2366, miR-215-5p, miR-30c-5p, let-7a-3p, miR-4429, miR-485-3p, miR-3600, novel\_83, miR-222-5p, miR-15a-5p, miR-383-5p, miR-487a-3p, miR-30b, miR-21-3p, miR-30d, miR-221-5p, miR-1277-5p, miR-320d, miR-146a-5p, miR-381-3p, miR-140-5p, miR-96-5p, miR-211-5p, miR-101-3p, miR-30b-5p, miR-335, miR-628-3p, miR-541-3p, miR-3956-3p, novel\_60, miR-1285-5p, miR-541, miR-2284aa, miR-450b-5p, miR-2300a-5p, novel\_78, miR-421, miR-16b, miR-320b, miR-146b, miR-424-5p, miR-2310, miR-8485, miR-320a, miR-2448-3p, miR-30e-5p, miR-1248, miR-1814c, miR-190a-3p, miR-215-5p, miR-204-5p, miR-3607-3p, miR-16-5p, miR-30a-5p, miR-30c, miR-300, miR-411-3p, miR-429-3p, miR-450a-1-3p, miR-2284z, miR-545-5p, miR-1271-5p, miR-322-5p, miR-30f, miR-3071-3p, miR-107, miR-2285b, miR-29a-5p, miR-380-5p, miR-195a-5p, miR-146b-5p, miR-107, miR-410-5p, miR-7-1-3p, miR-320c, miR-670-3p, miR-382-5p, miR-16a, miR-15a, miR-379-3p, miR-335-5p, novel\_120, miR-342-3p, miR-2284w, novel\_27, miR-211, miR-3071-5p, novel\_23, miR-450c-3p, miR-1285, miR-873a-5p, miR-497-5p, miR-26a-2-3p, miR-219a-1-3p, miR-16b, miR-380-3p, miR-103a-3p, miR-31-5p, miR-103, miR-146a, let-7f-2-3p, let-7f-2-3p, miR-130b-5p, miR-380-5p, miR-539-3p

miR-27b-3p, miR-26a-2-3p, miR-497-5p, miR-16-1-3p, miR-16b, novel\_23, miR-450c-3p, miR-7b-5p, miR-708-3p, miR-149-5p, miR-412-5p, miR-103a-3p, miR-31-5p, miR-2411-3p, miR-7-5p, miR-432-3p, miR-6240, miR-378f, miR-216a-3p, miR-181b-3p, miR-677, miR-669, miR-320c, miR-6535, miR-216b-3p, miR-379-3p, miR-155-5p, miR-330-5p, miR-2427, miR-1290, novel\_121, miR-2284z, miR-450a-1-3p, miR-322-5p, miR-431, miR-412, miR-429-3p, miR-6517, miR-2285ad, miR-127-5p, miR-30f, miR-3071-3p, miR-664-3p, miR-2285b, miR-148b-5p, miR-331-5p, miR-223-5p, miR-300-3p, miR-125a, miR-2285aa, miR-2355-5p, miR-574-5p, miR-331-5p, novel\_9, miR-125b-5p, miR-6740-5p, miR-16-5p, miR-101c, miR-1388-5p, miR-126a-5p, miR-148b-5p, miR-455-3p, miR-1298-3p, miR-539-5p, miR-181b-2-3p, miR-330-3p, miR-487b-5p, miR-182-5p, miR-16b, miR-431-5p, miR-8485, miR-378d, miR-9-3p, miR-544-5p, miR-99b-5p, miR-381-3p, miR-140-3p, miR-203-3p, miR-499a-3p, miR-126b-5p, miR-139-5p, miR-4792, miR-3968, miR-2447, miR-34a-5p, miR-361-5p, miR-218-1-3p, miR-16-1-3p, miR-378a-3p, miR-378i, miR-2284h-5p, miR-345-3p, miR-92a-1-5p, miR-422a, miR-219b-5p, miR-2285p, miR-618, miR-143-3p, miR-181b-1-3p, miR-421-5p, miR-2285w, miR-186-5p, miR-543-3p, miR-433-3p, miR-450a-1-3p, miR-15b-5p, miR-499b-3p, miR-296-3p, miR-216b-3p, miR-548o-3p, miR-130b-5p, miR-1468-5p, novel\_74, miR-30a-3p, miR-30e-3p, miR-2285j, miR-224-5p, miR-6525, miR-3184-3p, miR-219a-1-3p, miR-2284ab, miR-3071-5p, miR-181a-5p, miR-1434-3p, miR-103, miR-544b, miR-185-5p, miR-125a-5p, miR-2285l, miR-99a-5p, miR-330-3p, miR-224-5p, miR-130b-5p, miR-135b-5p, miR-195a-5p, miR-107, miR-34b, miR-146b-3p, miR-7-1-3p, miR-378b, miR-382-5p, miR-16a, miR-34c, miR-6402, miR-15a, miR-2428, novel\_27, miR-449a, miR-326-3p, miR-24-3p, miR-2285v, miR-3957-3p, miR-210h-3p, miR-99a-5p, miR-128-3p, miR-29b-2-5p, miR-378d, miR-30c-1-3p, miR-432-3p, miR-193a, miR-1306-5p, miR-125a-3p, miR-422a, miR-30c-2-3p, miR-3955-3p, miR-127-5p, miR-543-5p, novel\_127, miR-221-5p, miR-18a-3p, miR-26b-3p, miR-378h, miR-9788-3p, miR-1290, miR-378b, miR-378i, miR-6529a, miR-378a-3p, miR-30b-3p, miR-2426, miR-378c, miR-30b-3p, miR-3120-5p, miR-2889, miR-3956-3p, novel\_60, miR-378c, miR-378c, miR-218-5p, miR-29b-2-5p, miR-320e, miR-324-3p, miR-664a, miR-7134-3p, miR-874-5p, miR-10b, miR-378b, miR-221-5p, miR-30c-1-3p, miR-378a-3p, miR-504-5p, miR-7977, miR-1271, miR-320b, miR-378e, miR-4443, miR-669, miR-361-3p, miR-18a-3p, miR-3154, miR-1306, miR-504, miR-668-5p, miR-1291, miR-1827, miR-485-5p, miR-378f

CWC22 ENSOARGO(CWC22 sp

TRPV6 ENSOARGO(C transien



miR-411b-5p, miR-2459, miR-539-5p, miR-142-5p, miR-1298-3p, miR-330-3p, miR-323b, miR-758-3p, miR-541, miR-744-3p, miR-1388-3p, miR-103a-2-5p, miR-214-3p, miR-491-5p, miR-29b-1-5p, miR-323b-3p, miR-16b, miR-182-5p, miR-199a-3p, miR-431-5p, miR-203-3p, miR-378g, miR-211-5p, miR-4792, miR-2284g, miR-299b-5p, miR-140-5p, miR-361-3p, miR-9-5p, miR-2447, miR-154-3p, miR-3968, miR-628-3p, novel\_82, miR-7859, miR-18a-3p, miR-664-5p, miR-133a-3p, miR-2284u, miR-493-3p, miR-217-5p, miR-30c-5p, miR-2366, miR-2424, miR-195a-3p, miR-345-3p, miR-329a-5p, miR-487a, miR-2484, miR-3601, miR-345-3p, miR-30b, miR-618, miR-15b-5p, miR-10a, miR-154a-3p, miR-30c-1-3p, miR-2331-3p, miR-885-3p, miR-543-3p, miR-625-5p, miR-345-5p, miR-339b, miR-433-3p, miR-30d-5p, miR-299, miR-2285c, miR-450a-1-3p, miR-181c-5p, miR-142a-5p, miR-6525, novel\_44, miR-214, miR-3074-5p, miR-874-5p, novel\_74, miR-30a-3p, miR-3604, miR-665, miR-2285j, miR-30e-3p, miR-134-3p, miR-3431, miR-339-5p, miR-103a-3p, miR-497-5p, miR-4508, miR-27b-3p, miR-2284x, miR-16b, miR-197-3p, miR-450c-3p, novel\_23, miR-542-3p, miR-223-3p, miR-432-3p, miR-628-5p, miR-6240, miR-378a-5p, miR-2411-3p, novel\_51, miR-296-3p, miR-320c, miR-299b-3p, miR-3074-5p, miR-329-5p, miR-2319a, miR-150-5p, miR-3065-5p, miR-216a-3p, miR-148a-3p, miR-625-3p, miR-6119-3p, miR-206, miR-425-5p, miR-4324, miR-412-5p, miR-450a-1-3p, miR-2284z, novel\_121, miR-9-5p, miR-322-5p, novel\_79, miR-431, miR-299a-3p, miR-429-3p, miR-30c, miR-885-3p, miR-330-5p, miR-1290, miR-2284y, miR-3064-5p, miR-152-3p, novel\_127, novel\_96, miR-3071-3p, miR-133c, miR-3068-3p, miR-1248, miR-2474, miR-876-3p, miR-329b, miR-345-5p, miR-30e-5p, miR-16-5p, novel\_9, miR-100-3p, miR-9788-3p, miR-216a-3p, miR-2285e, miR-27a-3p, miR-222-5p, novel\_4, miR-2284aa, miR-16-2-3p, miR-200a-5p, miR-30b-3p, miR-10b, miR-296-3p, miR-2355-5p, miR-3065-3p, miR-2284n, novel\_25, miR-323-5p, miR-129b-3p, miR-488-3p, miR-1248, miR-186-5p, miR-7144-5p, miR-2312, miR-1271, miR-193a-5p, miR-2284v, novel\_42, miR-1306-5p, miR-338-5p, miR-3969, miR-5100, miR-2284k, miR-410-5p, miR-2433, miR-204-5p, miR-134-5p, miR-129-5p, miR-138-5p, miR-212-5p, novel\_121, miR-134-5p, miR-2411-5p, miR-483-3p, miR-1271-5p, miR-134, novel\_133, miR-664-5p, miR-181a-2-3p, miR-503-5p, miR-216c-5p, miR-490-3p, miR-3065-3p, miR-2411, miR-181b-1-3p, novel\_17, miR-210-5p, miR-205-5p, novel\_96, miR-107, miR-2284m, miR-2898, miR-211-5p, miR-541-5p, miR-181b-3p, miR-677, miR-6535, miR-669, miR-323a-5p, miR-361-3p, miR-2285ab, novel\_94, miR-107, miR-299b-5p, miR-96-5p, miR-2284j, miR-2285f, miR-135a-2-3p, miR-2284w, miR-8095, miR-211, miR-1973, miR-133a-5p, miR-6529b, miR-502-5p, miR-181b-2-3p, miR-1343-3p, miR-133b-5p, miR-103a-3p, miR-103, miR-149-5p, miR-503-5p, miR-2284d, miR-432-5p, miR-30b-3p, miR-1434-3p, miR-432, miR-2284x, miR-30b-3p, miR-138, miR-2284ab, miR-628-5p, miR-363-5p, miR-4532, miR-2331-5p, novel\_51, miR-503-5p, miR-124-5p, novel\_124, miR-483-3p, miR-491-5p

CASP8 ENSOARGO(caspase

PCSK2 ENSOARGO(proprote

miR-122-5p, miR-181c-5p, miR-769-5p, miR-346, miR-224-5p, miR-98-3p, miR-3074-5p, miR-3184-3p, novel\_74, miR-151-3p, miR-30a-3p, miR-664a-5p, let-7b-3p, miR-15b-3p, miR-30e-3p, miR-377-3p, miR-504-5p, miR-548o-3p, miR-345-5p, miR-433-3p, miR-411, miR-486-3p, miR-181b-1-3p, miR-369-3p, miR-3653-3p, miR-2484, miR-324-3p, miR-26a-5p, miR-2285p, miR-328-3p, miR-380-5p, miR-30d-3p, miR-106a, miR-2284u, miR-361-5p, miR-148a-5p, miR-33b-3p, miR-184-3p, miR-98-3p, miR-2366, miR-361-3p, miR-3968, miR-499a-5p, miR-301a-5p, miR-144-5p, miR-1185-2-3p, miR-378g, miR-3596, miR-24-1-5p, miR-2284g, miR-2319b, miR-1983, miR-136-5p, miR-504, miR-381-3p, miR-221, miR-409-5p, miR-1b-5p, miR-2284b, miR-1388-3p, miR-101b-3p, miR-127-3p, miR-103a-2-5p, miR-491-5p, miR-1185-5p, miR-487b-5p, miR-29b-1-5p, miR-106b-5p, miR-148b-5p, miR-455-3p, miR-1185-3p, miR-1298-3p, miR-145b, miR-181b-2-3p, novel\_78, miR-1388-5p, miR-758-3p, miR-2284r, miR-541, miR-301b-5p, miR-1260b, miR-193a-5p, miR-144-5p, miR-134-5p, miR-6740-5p, miR-874-3p, miR-20b-5p, miR-345-5p, miR-93-5p, miR-301, miR-424-3p, miR-2284y, miR-2285b, miR-148b-5p, miR-152-3p, miR-200a-3p, novel\_96, miR-1a-2-5p, miR-30f, miR-205-5p, miR-125a-3p, miR-134-5p, novel\_121, miR-486-5p, miR-1224-5p, miR-412, miR-155-5p, miR-2427, miR-330-5p, miR-1290, miR-2284w, miR-193b-3p, miR-758-5p, miR-1a-1-5p, miR-379-3p, miR-320c, miR-677, miR-144-3p, miR-181b-3p, miR-26b-5p, miR-3120-3p, miR-3074-5p, miR-412-3p, miR-3065-5p, miR-148a-3p, miR-432-3p, miR-2285r, miR-432-3p, let-7f-2-3p, let-7f-2-3p, miR-193a-3p, miR-105-5p, miR-365b-5p, novel\_51, miR-194a, miR-377-3p, novel\_116, miR-412-5p, miR-134-3p, miR-3431, miR-31-5p, miR-708-3p, miR-542-3p, miR-3074-2-3p, miR-425-5p, miR-6516-3p, miR-29b-2-5p, miR-222-3p, miR-193b-3p, miR-3065-3p, miR-370-5p, miR-221-5p, miR-545-3p, miR-133b-3p, miR-27b-

novel\_51, miR-106a-5p, miR-17-5p, miR-2411-3p, miR-377-3p, miR-382, let-7f-2-3p, miR-345-5p, miR-432-3p, miR-432-3p, miR-3071-5p, miR-19b-2-5p, miR-188-5p, miR-380-3p, miR-30b-3p, miR-219a-1-3p, miR-16-1-3p, miR-31-5p, miR-103a-3p, miR-2355-3p, miR-103, miR-20b, miR-134-3p, miR-3431, miR-34c, miR-20a-5p, miR-656-5p, miR-199c, novel\_1, novel\_120, miR-335-5p, novel\_27, miR-449a, miR-2428, miR-199b-5p, miR-24-3p, miR-3970, miR-378f, miR-107, miR-677, miR-144-3p, miR-181b-3p, miR-2404, miR-34b, miR-205-5p, miR-200c, miR-107, miR-543-5p, miR-127-5p, miR-200c-3p, miR-200a, novel\_39, miR-199a-5p, miR-2285b, miR-2284a, miR-23b-5p, miR-345-3p, miR-200b-3p, miR-1224-5p, miR-429-3p, miR-545-5p, miR-486-5p, miR-378h, miR-144, miR-409-3p, miR-486b-3p, miR-103b, miR-378c, miR-93, miR-93-5p, miR-17-5p, miR-3154, miR-20b-5p, miR-7144-5p, miR-485-5p, miR-671-5p, miR-345-5p, miR-199a-5p, miR-223-5p, miR-331-5p, miR-34c-5p, miR-29b-1-5p, miR-106b-5p, miR-199a-3p, novel\_115, miR-199b-5p, miR-3955-3p, miR-376b, miR-33a-5p, miR-101b-3p, miR-106a-5p, miR-1b-5p, miR-378d, miR-7857, miR-30b-3p, miR-378b, miR-484, miR-101c, miR-378c, miR-181b-2-3p, miR-199b-3p, miR-9788-3p, miR-455-3p, miR-1185-3p, novel\_82, miR-2440, miR-2285t, miR-490-5p, miR-335, miR-212-3p, miR-199b-5p, miR-544-5p, miR-139-5p, miR-20a-3p, miR-203-3p, miR-1185-2-3p, miR-4443, miR-378g, miR-378e, miR-345-3p, miR-422a, miR-34b-5p, miR-1277-5p, miR-2484, miR-106a, miR-20a, miR-216c-5p, miR-486-3p, miR-29b-1-5p, miR-142a-3p, miR-181b-1-3p, miR-378a-3p, miR-5703, miR-378i, miR-16-1-3p, miR-34a-5p, miR-142-3p, miR-1b-3p, miR-106a, miR-199a-3p, miR-200b, miR-222-5p, miR-19b-1-5p, miR-338-5p, miR-487a-5p, miR-3074-2-3p, miR-378c, miR-539-5p, miR-145a-3p, miR-6134, miR-433-3p, miR-186-5p, novel\_99, let-7a-3p, miR-345-5p, miR-532-5p, miR-2331-5p, miR-8095, miR-211, miR-2285x, miR-212-3p, miR-3059-5p, miR-135a-2-3p, miR-22-5p, miR-499a-5p, miR-128-1-5p, miR-107-5p, miR-371a-5p, miR-16a, miR-101-3p, miR-15a, miR-27a-3p, miR-378g, miR-146b-3p, miR-211-5p, miR-541-5p, miR-139-5p, miR-195a-5p, miR-146b-5p, miR-504, miR-18a-3p, miR-129b-5p, miR-378j, miR-140-5p, miR-491-3p, miR-30c-1-3p, miR-23a-3p, miR-424-5p, miR-2330-5p, miR-214-3p, miR-103a-2-5p, miR-146b, miR-16b, miR-146a, miR-194-3p, miR-9788-3p, miR-455-3p, miR-134-3p, miR-27a-3p, miR-26b-3p, miR-409b, miR-27b-3p, miR-497-5p, miR-1839-5p, miR-16b, miR-125b-2-3p, novel\_23, miR-653, miR-346, miR-214, miR-16-5p, miR-145a-3p, miR-1306-5p, miR-204-5p, miR-4492, miR-424-5p, novel\_74, miR-665, miR-6740-5p, miR-15b-5p, miR-151b, miR-139-5p, miR-582-5p, miR-552-3p, miR-216b-3p, miR-504-5p, miR-140-5p, miR-30c-1-3p, miR-671-5p, miR-625-5p, miR-23b, miR-129b-3p, miR-146a-5p, miR-181a-2-3p, miR-4286, novel\_127, miR-21-3p, miR-216a-5p, miR-30c-2-3p, miR-324-3p, novel\_17, miR-151-5p, miR-23c, miR-15a-5p, miR-23b-3p, miR-322-5p, miR-505-5p, miR-18a-3p, miR-361-5p, miR-493-3p, miR-1197-5p, miR-218-2-3p, miR-2904, miR-1290

CXorf58

ENSOARGO(chromosome)

MEPCE

ENSOARGO(methylph)

|        |                   |                                                                                                                                                                                                                                                                                                                                                                                                                                                                                                                                                                                                                                                                                                                                                                                                                                                                                                                                                                                                                                                                                                                                                                                                                                                                                                                                                                                              |
|--------|-------------------|----------------------------------------------------------------------------------------------------------------------------------------------------------------------------------------------------------------------------------------------------------------------------------------------------------------------------------------------------------------------------------------------------------------------------------------------------------------------------------------------------------------------------------------------------------------------------------------------------------------------------------------------------------------------------------------------------------------------------------------------------------------------------------------------------------------------------------------------------------------------------------------------------------------------------------------------------------------------------------------------------------------------------------------------------------------------------------------------------------------------------------------------------------------------------------------------------------------------------------------------------------------------------------------------------------------------------------------------------------------------------------------------|
| N4BP1  | ENSOARGO(NEDD4 bi | <p>miR-18b, miR-150-5p, miR-3970, miR-18a-3p, miR-668-5p, miR-107, miR-9851-3p, novel_94, miR-195a-5p, miR-378f, miR-4792, miR-378b, miR-7977, miR-378e, miR-411b-3p, miR-2483-3p, miR-670-3p, miR-320c, miR-2285n, miR-15a, miR-576-3p, miR-16a, miR-1973, novel_1, novel_120, miR-2447, miR-877-3p, miR-2428, miR-432, miR-378b, miR-16b, miR-378c, miR-497-5p, miR-133b-5p, novel_4, miR-103a-3p, miR-432-5p, miR-455-3p, miR-103, miR-320b, miR-197-5p, miR-29b-1-5p, miR-16b, miR-424-5p, miR-668-3p, miR-23a-3p, miR-378d, miR-21a-3p, miR-320a, miR-18a, miR-18a-5p, miR-7144-5p, miR-1895, miR-378a-3p, miR-874-3p, miR-370-3p, miR-216b-3p, miR-204-3p, miR-877-5p, miR-15b-5p, miR-151b, miR-29b-2-5p, miR-320e, miR-4492, miR-424-5p, miR-378c, miR-16-5p, miR-378c, miR-378i, miR-2427, miR-2904, miR-378a-3p, miR-4429, miR-664-5p, miR-2285ad, miR-18a-3p, miR-3600, miR-18b-5p, miR-322-5p, miR-23b-3p, miR-15a-5p, miR-378h, miR-23c, miR-151-5p, miR-422a, miR-320d, miR-107, novel_127, miR-29b-2-5p, miR-29b-1-5p, miR-148b-5p, miR-3956-5p</p> <p>miR-219-3p, miR-33a-3p, miR-219b-3p, miR-335, miR-374b-3p, miR-669a-3p, miR-374a-3p, miR-335-5p, miR-329a-5p, miR-374a-3p, miR-2310, miR-219a-2-3p, miR-145-3p, miR-1290, miR-1246, miR-329b, miR-135b-5p, miR-1814c, miR-3068-3p, miR-329-5p, miR-2285aa, miR-539-5p, miR-7857-3p, miR-7859, novel_121, miR-2284z</p> |
| KLHL15 | ENSOARGO(kelch-li |                                                                                                                                                                                                                                                                                                                                                                                                                                                                                                                                                                                                                                                                                                                                                                                                                                                                                                                                                                                                                                                                                                                                                                                                                                                                                                                                                                                              |

miR-26b-5p, miR-3120-3p, miR-2404, miR-374c-3p, miR-653b, miR-148a-3p, miR-150-5p, miR-3065-5p, miR-216a-3p, miR-450b-3p, miR-1291, miR-9851-3p, let-7e-5p, miR-379-5p, miR-24-3p, miR-301b-3p, miR-199b-5p, miR-20a-5p, miR-485-3p, let-7i, miR-203b-5p, miR-147-5p, miR-187-3p, miR-130a-3p, miR-412-5p, miR-134-3p, miR-185-5p, let-7g-5p, novel\_116, miR-149-5p, miR-20b, miR-1843b-5p, miR-22-3p, miR-30b-3p, miR-219a-1-3p, miR-455-5p, miR-130b-5p, miR-380-5p, miR-6240, miR-654-3p, miR-432-3p, miR-432-3p, let-7j, miR-296-3p, miR-296-3p, miR-330-3p, miR-197-5p, miR-3141, novel\_51, miR-106a-5p, miR-17-5p, miR-455-5p, miR-2331-5p, miR-574-5p, miR-503-3p, miR-3956, miR-215-5p, miR-300-3p, miR-331-5p, miR-374c-3p, miR-199a-5p, miR-154b-5p, miR-30e-5p, miR-2448-3p, miR-93-5p, miR-17-5p, miR-329a, miR-3074-1-3p, miR-7144-5p, miR-20b-5p, miR-671-5p, miR-93, miR-331-3p, miR-6740-5p, miR-486b-3p, miR-429-3p, miR-431, miR-505-5p, miR-24-2-5p, miR-582-3p, miR-450a-1-3p, miR-2284z, miR-1290, miR-30a-5p, let-7d, miR-128-3p, miR-200b-3p, miR-30a-3p, miR-380-5p, miR-199a-5p, let-7g, miR-1957a, miR-192-3p, miR-490-3p, miR-219-3p, miR-200c, let-7c-5p, let-7f-5p, miR-200c-3p, miR-6536, miR-152-3p, novel\_96, miR-4792, miR-139-5p, miR-2319b, miR-10b, miR-25, miR-378g, miR-3082-5p, miR-203-3p, let-7d-5p, miR-140-5p, miR-361-3p, miR-199b-5p, miR-2447, miR-361-3p, miR-219a-2-3p, miR-2440, miR-499a-5p, miR-7134-3p, miR-490-5p, miR-2285t, miR-2284q, miR-330-3p, miR-2300a-5p, miR-455-3p, miR-329-3p, miR-484, miR-143-5p, miR-30b-3p, miR-362-3p, miR-2426, miR-16-2-3p, miR-21b, miR-1839-5p, miR-2284aa, let-7a-5p, miR-2330-5p, miR-106a-5p, miR-376b, miR-193a, miR-431-5p, miR-362-3p, miR-106b-5p, miR-1185-5p, miR-491-5p, miR-130b-3p, miR-25-5p, miR-199b-5p, miR-2285o, let-7e, miR-221-5p, miR-296-3p, miR-301a-3p, miR-192-5p, miR-216b-5p, miR-139-5p, miR-421-5p, miR-656-5p, miR-22-5p, miR-2440, miR-33a-3p, miR-2284w, novel\_60, miR-3956-3p, miR-136-5p, miR-412-3p, miR-504, miR-335-3p, miR-493-5p, miR-1983, miR-140-5p, miR-3970, miR-129b-5p, miR-381-3p, miR-3596, miR-411b-3p, miR-320c, miR-677, miR-3064-5p, miR-452-3p, miR-374b-5p, miR-7977, miR-3085-3p, miR-3955-3p, miR-7-5p, miR-320b, miR-431-5p, miR-330-3p, miR-2411-3p, miR-2284l, miR-345-5p, miR-493-5p, miR-6240, miR-668-3p, miR-382, miR-1388-5p, miR-544a, miR-21b, miR-484, miR-7b-5p, miR-1298-5p, miR-6238, miR-544b, miR-330-3p, novel\_78, miR-548w, miR-181b-2-3p, miR-331-5p, miR-29b-2-5p, miR-374b, miR-3184-3p, miR-6128, miR-193a-5p, miR-10b-3p, miR-345-5p, miR-345-5p, miR-885-3p, miR-381-3p, miR-331-5p, miR-129b-3p, miR-200a-5p, miR-320a, miR-544-3p, miR-140-5p, miR-504-5p, miR-548o-3p, miR-216b-3p, miR-2355-5p, miR-1271, miR-320d, miR-191-3p, miR-1277-5p, miR-2484, miR-374a-5p, miR-500a-5p, miR-345-3p, miR-122-3p, miR-376a-5p, miR-450b-5p, miR-29a-5p, miR-29b-2-5p, miR-495-5p, miR-3064-5p, miR-885-3p, miR-300, miR-4429, miR-345-3p, miR-3578, miR-2300b-3p, miR-1290, miR-2904, miR-212-5p, miR-431

TPP1

ENSOARGO( tripepti

AGGF1

ENSOARGO( angiogen

let-7a-2-3p, miR-2284l, novel\_51, miR-582, miR-377-3p, miR-149-5p, miR-134-3p, miR-3431, miR-339-5p, miR-340-3p, miR-31-5p, miR-103a-3p, miR-497-5p, miR-2284x, miR-16b, miR-3432b, miR-450c-3p, miR-22-3p, miR-432, miR-542-3p, miR-335-5p, miR-206, miR-485-3p, miR-4324, miR-28c, miR-320c, miR-669, miR-6535, miR-299b-3p, novel\_68, miR-3074-5p, miR-378f, miR-1306, novel\_39, miR-3956-5p, miR-2285b, miR-3064-5p, novel\_127, miR-6536, miR-205-5p, miR-125a-3p, miR-450a-1-3p, miR-134-5p, miR-129-1-3p, miR-322-5p, miR-1224-5p, novel\_79, miR-18b-5p, miR-299a-3p, miR-6517, miR-1343-5p, miR-330-5p, miR-23b-5p, miR-16-5p, miR-144-5p, miR-2284v, miR-134-5p, miR-125b-5p, miR-100-3p, miR-2284k, miR-376c-3p, miR-300-3p, miR-2285aa, miR-1271, miR-125a, miR-874-3p, miR-1248, miR-329a, miR-301, miR-1b-5p, miR-378d, miR-1388-3p, miR-214-3p, miR-487b-5p, miR-182-5p, miR-16b, miR-455-3p, novel\_78, miR-1343-3p, miR-1839-5p, miR-1388-5p, miR-362-3p, miR-1a-3p, miR-329-3p, miR-541, miR-1285-5p, miR-361-3p, miR-877-3p, miR-2284j, miR-2447, miR-3968, miR-144-5p, miR-4443, miR-378g, miR-3596, miR-126b-5p, miR-211-5p, miR-544-5p, miR-504, miR-2285i, miR-664b-3p, miR-376c-3p, miR-345-3p, miR-324-3p, miR-422a, miR-92a-1-5p, miR-210-5p, miR-618, miR-328-3p, miR-210-3p, miR-7859, miR-30d-3p, miR-212-5p, miR-18a-3p, miR-493-3p, miR-33b-3p, miR-378a-3p, miR-378i, miR-122-5p, miR-769-5p, miR-346, miR-214, miR-3184-3p, miR-129-2-3p, miR-3074-5p, miR-4492, miR-500, miR-129-5p, miR-669a-3p, novel\_74, miR-487b-5p, miR-151-3p, miR-30a-3p, miR-664a-5p, miR-30e-3p, miR-15b-5p, miR-376e-3p, miR-10a, miR-377-3p, miR-296-3p, miR-552-3p, miR-504-5p, miR-2331-3p, miR-30c-1-3p, miR-625-5p, miR-186-5p, miR-1827, miR-339b, miR-500a-3p, miR-299, miR-450a-1-3p, miR-539-3p, miR-382, miR-452-5p, miR-1343-5p, miR-125a-5p, miR-103, miR-132-

KRT15 ENSOARGO(keratin) miR-331-3p

SMPD4 ENSOARGO(sphingom) miR-331-3p

miR-200b-3p, miR-10b-2, miR-128-3p, miR-300, miR-214-5p, miR-18b-5p, miR-7641, miR-1224-5p, miR-429-3p, miR-2285ad, novel\_127, miR-200a-3p, miR-107, miR-200c-3p, miR-217, miR-125a-3p, miR-200c, miR-376b-3p, miR-205-5p, miR-1260a, miR-1271-3p, miR-450b-5p, miR-3064-5p, miR-30a-3p, miR-671-5p, miR-1248, miR-7144-5p, novel\_48, miR-376c-5p, miR-329b, miR-3154, miR-18a, miR-376c-5p, miR-320a, miR-200a-5p, miR-301, miR-381-3p, miR-3965, miR-300-3p, miR-141-3p, miR-370-3p, miR-204-5p, miR-374b-3p, miR-410-3p, miR-144, miR-5100, miR-2332, miR-1260b, miR-374a-3p, miR-193a-5p, miR-1260b, miR-16-1-3p, miR-194-5p, miR-3071-5p, miR-1843b-5p, miR-708-3p, miR-103, miR-149-5p, novel\_116, miR-134-3p, miR-3431, miR-377-5p, miR-103a-3p, miR-31-5p, miR-124-5p, miR-194a, miR-2331-5p, miR-105-5p, miR-330-3p, miR-3141, miR-296-3p, miR-377-3p, miR-146a, miR-503-3p, miR-296-3p, miR-2285r, let-7f-2-3p, let-7f-2-3p, miR-6240, miR-2319a, miR-7975, miR-146b-5p, miR-107, miR-3591-3p, miR-216a-3p, miR-18a-3p, miR-18b, miR-3141, miR-320c, miR-144-3p, novel\_69, miR-26b-5p, miR-7-1-3p, miR-329-5p, miR-147-5p, miR-199c, novel\_1, miR-6119-3p, miR-33a-3p, novel\_87, miR-142b, miR-24-3p, miR-323c, miR-211, miR-758-5p, miR-495-3p, miR-219b-3p, miR-361-5p, miR-218-1-3p, miR-4429, miR-188-3p, miR-217-5p, miR-124-3p, miR-199a-3p, miR-340-5p, miR-200b, miR-222-5p, miR-210-3p, miR-383-5p, miR-30d-3p, miR-380-5p, miR-1b-3p, miR-18a-3p, miR-21-3p, miR-760-3p, miR-466i-5p, miR-202-5p, miR-320d, miR-219b-5p, miR-26a-5p, novel\_17, miR-210-5p, miR-196a-3p, miR-143-3p, miR-146a-5p, miR-377-5p, miR-582-5p, novel\_99, miR-18a-5p, miR-129b-3p, miR-21a-3p, miR-377-3p, miR-582-5p, miR-27a-5p, miR-182-5p, miR-21-3p, miR-1277-3p, miR-3604, miR-30a-3p, miR-151-3p, miR-30a-3p, miR-15b-3p, miR-6525, miR-2330-3p, miR-

miR-34b-3p, miR-183-5p, miR-2285w, miR-2432, miR-376a-5p, miR-664b-3p, miR-376c-3p, miR-130a-5p, miR-216a-5p, miR-26a-5p, novel\_17, miR-374a-5p, miR-34b-5p, miR-1277-5p, miR-299-3p, miR-2284m, miR-760-3p, miR-466i-5p, miR-30d-3p, miR-199a-3p, miR-2284h-5p, miR-23b-3p, miR-222-5p, miR-23c, miR-124-3p, miR-376a-5p, miR-133a-3p, miR-218-1-3p, miR-34a-5p, miR-148a-5p, miR-33b-3p, novel\_73, miR-1271, miR-2330-3p, miR-539-5p, miR-338-3p, novel\_44, miR-30a-3p, miR-324-3p, miR-30e-3p, miR-208b-5p, miR-450b-3p, miR-370-5p, miR-21-3p, miR-296-3p, miR-30c-1-3p, miR-376e-3p, miR-216b-5p, miR-133b-3p, let-7g-3p, miR-23a-3p, miR-1388-3p, miR-124a, miR-193a, miR-1b-5p, miR-758-3p, miR-30c-1-3p, miR-2957, miR-199a-3p, miR-27a-3p, novel\_4, miR-148b-5p, miR-421, miR-147a, miR-758-3p, miR-541, miR-2284aa, miR-21b, miR-450b-5p, miR-2284j, miR-452-5p, miR-3059-5p, miR-541-3p, miR-1285-5p, novel\_111, miR-218-5p, miR-490-5p, miR-3968, miR-374b-5p, miR-7977, miR-20a-3p, miR-4443, miR-27a-3p, miR-2483-3p, miR-489, miR-129b-5p, miR-378j, miR-361-3p, miR-96-5p, miR-136-5p, miR-30a-3p, miR-1957a, miR-29a-5p, miR-450b-5p, miR-30f, miR-30c-2-3p, miR-205-5p, miR-107, miR-450a-2-3p, miR-127-5p, miR-299a-3p, miR-134-5p, miR-450a-1-3p, miR-2284z, miR-545-5p, miR-214-5p, miR-1343-5p, miR-134, miR-128-3p, miR-133a-3p, miR-374b, miR-1306-5p, miR-145-3p, miR-100-3p, miR-6740-5p, miR-135a-5p, miR-2284k, miR-370-5p, miR-31-3p, miR-134-5p, miR-331-5p, novel\_9, miR-2355-5p, miR-2284n, miR-376c-3p, miR-34c-5p, miR-365a-3p, miR-3154, miR-331-5p, miR-10b-3p, miR-668-3p, miR-296-3p, let-7j, miR-432-3p, miR-2284l, miR-432-3p, miR-296-3p, miR-1343-5p, miR-452-5p, miR-466f-3p, miR-3955-5p, miR-103a-3p, miR-103, miR-185-5p, miR-450c-3p, miR-3071-5p, novel\_23, miR-873a-5p, miR-1285, miR-27b-3p, miR-188-5p, miR-2284ab, miR-21-5p, miR-380-3p, miR-1102, miR-4429, miR-450b-5p, miR-3120-5p, miR-873a-5p, miR-2285g, miR-2459, miR-328-3p, miR-2285e, miR-3600, miR-320d, miR-1a-2-5p, miR-127-5p, miR-214-3p, miR-320b, miR-2397-5p, novel\_103, miR-6119-5p, miR-2432, miR-1b-5p, miR-192-3p, miR-494-3p, miR-3529-3p, miR-2312, novel\_99, miR-6395, miR-2285ab, miR-488-3p, miR-2285c, miR-3591-3p, miR-3065-5p, miR-320a, miR-3154, miR-320c, miR-545-3p, miR-21-3p, miR-335, novel\_1, miR-129-5p, miR-1-5p, miR-2285n, miR-142b, miR-576-3p, miR-19b-1-5p, miR-1a-1-5p, miR-335-5p, miR-2285f, miR-6128, miR-214, miR-2285x

PDE8B ENSOARGO( phosphod

ENTHD1 ENSOARGO( ENTH dom



miR-330-3p, miR-193a-3p, let-7f-2-3p, let-7f-2-3p, miR-628-5p, miR-493-5p, miR-6240, miR-503-3p, novel\_23, miR-542-3p, miR-181a-5p, miR-27b-3p, miR-1260b, miR-29b, miR-130a-3p, miR-133b-5p, miR-3955-5p, miR-149-5p, miR-134-3p, miR-2285g, miR-33a-3p, miR-4324, miR-29a, miR-758-5p, miR-29c-3p, miR-2285x, miR-193b-3p, novel\_120, miR-301b-3p, miR-199b-5p, miR-374c-5p, novel\_27, miR-24-3p, miR-3970, miR-2387, miR-148a-3p, miR-2285ab, miR-6516-3p, miR-135b-5p, miR-26b-5p, miR-329-5p, miR-181b-3p, miR-677, miR-29a-3p, miR-374c-3p, miR-2404, miR-217, miR-200c, miR-125a-3p, miR-219-3p, miR-1260a, miR-2285af, miR-152-3p, miR-181b-5p, miR-127-5p, miR-200c-3p, miR-450a-2-3p, miR-30a-3p, miR-2284a, miR-2285b, miR-3065-3p, miR-199a-5p, miR-29a-5p, miR-2284y, miR-29d-3p, miR-1290, miR-200b-3p, miR-300, miR-429-3p, miR-2285ad, novel\_121, miR-2284z, miR-135a-5p, miR-29b-3p, miR-551b-3p, miR-767-5p, miR-133a-3p, miR-1197-3p, miR-1260b, miR-137-3p, miR-424-3p, miR-381-3p, miR-485-5p, miR-1248, miR-2318, miR-767, miR-2285aa, miR-3957-5p, miR-3957, miR-199a-5p, miR-365a-3p, miR-3959-5p, miR-374c-3p, miR-199b-5p, miR-130b-3p, miR-3955-3p, miR-376b, miR-652-5p, let-7c-3p, miR-125b-2-3p, miR-2284aa, miR-16-2-3p, miR-27a-3p, miR-181b-2-3p, miR-330-3p, miR-548w, miR-2285e, miR-455-3p, miR-148b-5p, miR-142-3p, miR-2285y, miR-101-3p, miR-2285n, miR-490-5p, miR-452-5p, miR-181d-5p, miR-1296-5p, miR-2285f, miR-3956-3p, novel\_60, miR-32-3p, miR-3059-5p, miR-2447, miR-4454, miR-219a-2-3p, miR-877-3p, miR-129b-5p, miR-378j, miR-199b-5p, miR-493-5p, miR-335-3p, miR-668-5p, miR-96-5p, miR-2285u, miR-27a-3p, miR-2483-3p, miR-25, miR-378g, novel\_17, miR-26a-5p, miR-210-5p, miR-30b-3p, miR-221-5p, miR-2432, miR-2424, miR-130a-5p, miR-181b-1-3p, miR-142a-3p, miR-5703, miR-217-5p, miR-2366, novel\_133, miR-278d, miR-novel\_25, miR-149-5p, miR-544b, miR-2355-3p, miR-544-3p, miR-2483-3p, miR-3431, miR-3120-3p, miR-18b-5p, miR-544a, miR-18a-5p, miR-1197-5p, miR-18a, miR-542-3p, miR-18b, miR-2448-3p, miR-380-5p, miR-380-5p, miR-376a-3p, miR-136-3p, miR-708-5p, miR-28-5p, miR-1973, miR-576-3p

miR-6529a, miR-378b, miR-10b, miR-7857, miR-30b-3p, miR-378c, miR-450b-5p, miR-5010-3p, miR-27a-3p, miR-2320-3p, miR-216a-3p, miR-9788-3p, miR-342, miR-320b, let-7e, let-7a-5p, miR-376b, miR-33a-5p, miR-30c-1-3p, miR-193a, miR-664b, miR-20a-3p, miR-378e, let-7d-5p, miR-27a-3p, miR-382-3p, miR-2285n, miR-2285y, miR-769-5p, miR-107-5p, miR-374a-3p, miR-32-3p, miR-3059-5p, miR-452-5p, miR-215-5p, miR-2300b-3p, miR-5703, miR-19b-3p, miR-4429, let-7a-3p, miR-148b-3p, novel\_83, miR-151-5p, miR-196a-3p, miR-320d, miR-466i-5p, miR-30b-3p, miR-34b-5p, miR-299-3p, miR-21-3p, miR-29b-1-5p, miR-125b-2-3p, miR-2411, miR-154b-3p, miR-18a-5p, miR-378a-3p, miR-32-3p, miR-496-3p, miR-3065-3p, miR-139-5p, miR-6130, miR-877-5p, miR-320e, miR-450b-3p, miR-6516-3p, miR-17-3p, miR-487a-5p, miR-378c, miR-539-5p, miR-4510, miR-10b-5p, miR-206-3p, let-7b-5p, miR-6134, miR-873a-5p, miR-1285, miR-1434-3p, miR-3071-5p, miR-30b-3p, miR-138, miR-29b, miR-133b-5p, miR-130a-3p, miR-432-5p, miR-185-5p, let-7g-5p, miR-224-5p, miR-197-5p, miR-124-5p, miR-130b-5p, miR-363-5p, miR-2387, miR-18b, miR-18a-3p, miR-450b-3p, miR-1291, miR-19a-3p, miR-379-5p, miR-7-1-3p, miR-10a-5p, miR-34b, miR-29a-3p, miR-34c, let-7i, miR-33a-3p, miR-92a-3p, novel\_1, miR-342-3p, miR-17-3p, miR-1307-3p, novel\_27, miR-449a, miR-29d-3p, let-7d, miR-300, miR-128-3p, miR-10a-5p, miR-496, miR-24-2-5p, miR-378h, miR-2411-5p, miR-545-5p, miR-30c-2-3p, miR-217, let-7c-5p, miR-2898, miR-17-3p, miR-92a-3p, miR-1, miR-24-2-5p, miR-3065-3p, miR-1957a, miR-490-3p, miR-381-3p, miR-320a, miR-18a, novel\_91, miR-23a-5p, miR-1814c, miR-487a-3p, miR-215-5p, miR-141-3p, miR-34c-5p, miR-769, miR-154b-5p, miR-29b-3p, miR-138-5p, miR-410-3p, miR-374b-3p, miR-3607-3p, miR-374a-3p, miR-378c, miR-301b-5p, miR-1a-3p, novel\_78, miR-1298-3p, miR-1185-3p, miR-421, miR-29b-1-

miR-29b, miR-30b-3p, miR-128b, miR-181a-5p, miR-145a-5p, miR-3071-5p, miR-503-5p, let-7g-5p, miR-2284d, miR-2355-3p, miR-26b-3p, miR-665, miR-503-5p, miR-654-3p, miR-195a-5p, miR-376a-2-5p, miR-2387, miR-2285ab, miR-18a-3p, miR-378b, miR-29a-3p, miR-2404, novel\_1, miR-22-5p, miR-15a, miR-502-5p, let-7i, miR-16a, miR-24-3p, novel\_27, miR-326-3p, miR-136-3p, miR-582-3p, let-7d, miR-300, let-7a-2-3p, miR-29d-3p, miR-483-3p, miR-24-2-5p, miR-545-5p, miR-376a-5p, miR-7641, miR-181b-5p, miR-543-5p, miR-2285af, let-7c-5p, miR-24-2-5p, miR-1271-3p, miR-2284a, miR-29b-2-5p, miR-2385-3p, let-7g-3p, miR-1814c, miR-671-5p, miR-7144-5p, miR-23a-5p, miR-190a-3p, miR-381-3p, miR-769, miR-2284n, miR-141-3p, miR-615-5p, miR-215-5p, miR-28-5p, miR-29b-3p, miR-409-3p, miR-26c, miR-331-3p, miR-145-3p, miR-101a-5p, miR-299a-5p, miR-2426, miR-2284aa, miR-6529a, miR-30b-3p, novel\_4, miR-3955-3p, miR-3085-3p, let-7e, miR-1306-5p, miR-326, miR-491-3p, miR-424-5p, let-7a-5p, miR-33a-5p, miR-129b-5p, miR-7857-3p, let-7d-5p, miR-10b, miR-20a-3p, miR-664b, miR-3064-5p, miR-7977, miR-541-5p, miR-335, miR-2284q, miR-2285t, miR-769-5p, miR-8095, miR-541-3p, miR-3059-5p, novel\_60, miR-181d-5p, miR-2285f, miR-1246, miR-215-5p, miR-5703, miR-1197-5p, miR-2904, miR-15a-5p, miR-383-5p, miR-548e-3p, miR-3600, miR-2284m, miR-299-3p, miR-21-3p, miR-130a-5p, miR-216c-5p, miR-183-5p, miR-2312, miR-582-5p, miR-27b-5p, miR-27a-5p, miR-192-5p, miR-22-3p, miR-140-5p, miR-708-5p, miR-424-5p, miR-29b-2-5p, miR-338-3p, let-7b-5p, miR-145a-3p, miR-16b, miR-497-5p, miR-26a-2-3p, miR-2113, miR-223-3p, novel\_23, miR-22-3p, miR-134-3p, miR-412-5p, novel\_116, miR-149-5p, miR-483-3p, novel\_51, let-7a-2-3p, miR-493-5p, let-7f-2-3p, let-7f-2-3p, miR-668-3p, miR-412-3p, let-7e-5p, miR-2319a, miR-1306, miR-299b-3p, miR-181b-3p, miR-669, miR-677, miR-216b-3p, miR-3074-5p, miR-329-

SLC27A6 ENSOARGO0 solute c: miR-193b-3p, miR-193a-3p, miR-193b-3p

STX16 ENSOARGO0 syntaxin miR-193b-3p, miR-193a-3p, miR-193b-3p

miR-708-5p, miR-424-5p, miR-155-5p, miR-6516-3p, miR-30a-3p, miR-19b-1-5p, miR-29b-2-5p, miR-222-3p, miR-30e-3p, miR-338-3p, miR-181c-5p, miR-6525, miR-145a-3p, novel\_99, miR-345-5p, miR-129b-3p, miR-15b-5p, miR-155-5p, miR-192-5p, miR-216b-3p, miR-660-5p, miR-34b-5p, miR-320d, miR-466i-5p, miR-216a-5p, miR-2285p, novel\_17, miR-26a-5p, miR-374a-5p, miR-2424, miR-146a-5p, miR-376a-5p, miR-29b-1-5p, miR-130a-5p, miR-181b-1-3p, miR-125b-2-3p, miR-345-3p, miR-183-5p, miR-34a-5p, miR-4429, miR-2904, novel\_133, miR-1246, miR-215-5p, miR-376a-5p, miR-199a-3p, miR-2284h-5p, miR-7859, miR-15a-5p, miR-30d-3p, miR-2285t, miR-3968, miR-301a-5p, miR-7705, miR-2285f, miR-9-5p, miR-181d-5p, novel\_60, miR-3956-3p, miR-335-3p, miR-221, miR-199b-5p, miR-27a-3p, miR-499b-5p, miR-374b-5p, miR-2284g, miR-20a-3p, miR-146b, miR-199b-5p, miR-1185-5p, miR-29b-1-5p, miR-16b, miR-320b, miR-199a-3p, miR-3187-3p, miR-744-3p, miR-2284b, miR-1388-3p, miR-382-3p, miR-424-5p, miR-21b, miR-101a-5p, miR-450b-5p, miR-125b-2-3p, miR-301b-5p, miR-216a-3p, miR-221-3p, miR-1185-3p, miR-27a-3p, miR-222-5p, miR-181b-2-3p, novel\_78, miR-28-5p, miR-26c, miR-3969, miR-2332, miR-323-3p, miR-16-5p, miR-374b, miR-28a-3p, miR-345-5p, let-7g-3p, miR-320a, miR-133c, miR-199a-5p, miR-34c-5p, miR-141-3p, miR-215-5p, miR-3068-3p, miR-200a-3p, miR-28-3p, miR-6536, miR-127-5p, miR-181b-5p, miR-1957a, miR-200a, miR-199a-5p, miR-29a-5p, miR-29b-2-5p, miR-30a-3p, miR-3529-3p, miR-128-3p, miR-155-5p, miR-582-3p, miR-1343-5p, miR-196a-5p, miR-545-5p, novel\_121, miR-214-5p, miR-322-5p, miR-9-5p, miR-2285ad, miR-222, miR-6517, novel\_1, miR-16a, miR-34c, miR-382-5p, miR-15a, miR-4324, miR-6402, miR-449a, miR-199b-5p, miR-2284w, miR-2285x, miR-146b-5p, miR-195a-5p, miR-6516-3p, miR-216a-3p, miR-378b, miR-2285ab, miR-320c, miR-677, miR-181b-3p, miR-34b, miR-655-5p, miR-7-1-

miR-146a, miR-190a, miR-452-5p, let-7a-2-3p, miR-539-3p, miR-2113, miR-1285, miR-138, miR-29b, miR-188-5p, miR-103a-3p, miR-31-5p, miR-3955-5p, miR-339-5p, miR-665, miR-3535, miR-103, miR-382-5p, miR-29a, miR-22-5p, miR-335-5p, miR-29c-3p, miR-2285x, miR-495-3p, miR-326-3p, miR-18b, miR-18a-3p, miR-150-5p, miR-19a-3p, miR-107, miR-9851-3p, miR-655-5p, miR-29a-3p, novel\_69, miR-146b-3p, miR-320c, miR-144-3p, miR-205-5p, miR-339a, miR-30f, miR-450a-2-3p, miR-2898, novel\_127, miR-107, miR-3065-3p, miR-29a-5p, miR-330-5p, miR-30a-5p, miR-218-2-3p, miR-29d-3p, let-7a-2-3p, miR-30c, miR-155-5p, miR-18b-5p, miR-412, novel\_79, miR-7641, miR-29b-3p, miR-144, miR-26c, novel\_9, miR-138-5p, miR-3607-3p, miR-1197-3p, miR-424-3p, miR-30e-5p, miR-18a, miR-320a, miR-329b, let-7g-3p, miR-10b-3p, miR-1248, novel\_48, miR-7144-5p, miR-141-3p, miR-326, miR-320b, miR-182-5p, miR-2957, miR-29b-1-5p, miR-376b, miR-8485, miR-4791, miR-484, miR-412-3p, miR-2426, novel\_78, miR-5010-3p, miR-2285n, miR-30b-5p, miR-371a-5p, miR-335, miR-2447, miR-452-5p, miR-190b-5p, miR-361-3p, miR-2319b, miR-7977, miR-3596, miR-4443, miR-196a-3p, miR-30b, miR-219b-5p, miR-320d, miR-3653-3p, miR-30d, miR-216c-5p, miR-195a-3p, miR-29b-1-5p, miR-146a-5p, miR-30c-5p, miR-1434-5p, miR-4429, miR-19b-3p, miR-18a-3p, miR-485-3p, miR-3600, miR-487a-3p, miR-2285j, miR-320e, miR-155-5p, miR-190a-5p, miR-487a-5p, miR-4492, miR-665-5p, miR-6134, miR-338-3p, miR-30d-5p, miR-30f, miR-18a-5p, miR-339b, let-7g-3p, miR-1827, miR-186-5p, miR-582-5p, miR-182-5p, miR-3065-3p, miR-582-5p, miR-155-5p, miR-204-3p, miR-361-3p, miR-423-5p, miR-2428, miR-2447, miR-541-3p, miR-17-3p, miR-4726-5p, miR-425-5p, miR-378e, miR-2404, miR-669, miR-4792, miR-3064-5p, miR-3074-5p, miR-181a-3p, miR-7975, miR-378f, miR-361-3p, miR-18a-3p, miR-378d, miR-363-5p, miR-3085-3p, miR-2300a-5p, miR-378c, miR-1260b, miR-4508, miR-378b, miR-541, miR-197-3p, miR-1260b, miR-378c, miR-3184-5p, miR-181c-3p, miR-378c, miR-3074-5p, miR-193a-5p, miR-665-5p, miR-664a, miR-17-3p, miR-2433, miR-551b-3p, miR-665, miR-204-3p, miR-151b, miR-378a-3p, miR-874-3p, miR-370-3p, miR-1895, miR-885-3p, miR-671-5p, miR-485-5p, novel\_39, miR-3064-5p, miR-4286, miR-17-3p, miR-543-5p, novel\_127, miR-1260a, miR-122-3p, miR-422a, miR-378h, miR-532-3p, miR-151-5p, miR-18a-3p, miR-423-3p, miR-493-3p, miR-885-3p, miR-378d, miR-378i, miR-3578, miR-7134-5p, miR-2904, miR-5703, miR-378a-3p

PNLIPRP2 ENSOARGO(pancreat

MED15 ENSOARGO(mediator

miR-362-5p, miR-186-5p, novel\_99, miR-7144-5p, miR-296-3p, miR-182-5p, miR-574-5p, miR-140-5p, miR-6516, miR-331-5p, miR-29b-2-5p, miR-664a-5p, miR-135a-5p, miR-30a-3p, miR-26c, miR-6740-5p, miR-30e-3p, miR-2285j, miR-130b-5p, miR-129-5p, miR-3074-2-3p, miR-6128, miR-122-5p, miR-346, miR-217-5p, miR-1434-5p, miR-361-5p, miR-200b-3p, miR-19b-3p, miR-30d-3p, miR-1224-5p, miR-429-3p, miR-18a-3p, miR-582-3p, miR-616-3p, miR-200b, miR-6516-5p, miR-383-5p, miR-217, miR-26a-5p, miR-200c, miR-208b-3p, miR-196a-3p, miR-205-5p, novel\_127, miR-200c-3p, miR-2898, miR-450a-2-3p, miR-29b-2-5p, miR-30a-3p, miR-18a-3p, miR-3065-5p, miR-140-5p, miR-135b-5p, miR-335-3p, miR-2284e, miR-26b-5p, miR-2285u, novel\_69, miR-3082-5p, miR-2404, miR-208a-3p, miR-133a-5p, miR-502b, miR-6123, miR-656-5p, novel\_101, miR-3956-3p, novel\_60, miR-3059-5p, miR-1285-5p, miR-362-5p, miR-125b-2-3p, miR-188-5p, miR-450b-5p, novel\_4, novel\_78, miR-31-5p, miR-500-5p, miR-185-5p, miR-182-5p, miR-363-5p, miR-130b-5p, miR-503-3p, novel\_69, miR-670-3p, miR-374c-3p, miR-29a-3p, miR-669, miR-329-5p, miR-378b, miR-320b, miR-10a-5p, miR-450b-3p, miR-9851-3p, miR-195a-5p, miR-6395, miR-148a-3p, miR-1306, miR-150-5p, miR-3065-5p, miR-216a-3p, miR-378b, miR-211, miR-326-3p, miR-2285m, miR-199b-5p, miR-335-5p, miR-542-5p, miR-758-5p, novel\_101, miR-17-3p, miR-29c-3p, miR-29a, miR-502-5p, miR-15a, miR-4324, miR-142b, miR-16a, novel\_87, miR-425-5p, miR-432-5p, miR-134-3p, miR-185-5p, miR-194-3p, novel\_116, miR-31-5p, miR-339-5p, miR-377-5p, miR-29b, miR-16b, miR-1260b, miR-497-5p, miR-455-5p, miR-432, miR-19b-2-5p, miR-653, miR-181a-5p, miR-1843b-5p, miR-374b-3p, miR-654-3p, miR-2285r, miR-432-3p, miR-432-3p, miR-345-5p, miR-380-5p, miR-130b-5p, miR-378a-5p, miR-124-5p, miR-483-3p, miR-377-3p, miR-365b-5p, novel\_51, miR-2411-3p, miR-455-5p, miR-374c-3p, miR-365a-3p, miR-199a-5p, miR-154b-5p, miR-3068-3p, miR-2285aa, miR-542-5p, miR-215-5p, miR-1271, miR-10b-3p, miR-345-5p, miR-1248, miR-503-3p, miR-2448-3p, miR-137-3p, miR-3154, miR-323-3p, miR-1260b, miR-365a-5p, miR-6128, miR-16-5p, miR-103b, miR-204-5p, miR-29b-3p, novel\_63, miR-331-3p, miR-3969, miR-505-5p, miR-322-5p, miR-483-3p, miR-545-5p, miR-129-1-3p, novel\_121, miR-196a-2-3p, novel\_79, miR-431, miR-128-3p, miR-10a-5p, miR-345-3p, miR-29d-3p, miR-330-5p, miR-450b-5p, miR-380-5p, miR-199a-5p, miR-192-3p, miR-3529-3p, miR-2385-3p, miR-181a-2-3p, miR-17-3p, miR-181b-5p, miR-127-5p, miR-543-5p, miR-152-3p, miR-2285af, miR-1260a, miR-2397-5p, miR-339a, miR-378g, miR-3082-5p, miR-4443, miR-454-5p, miR-4792, miR-7689-3p, miR-211-5p, miR-361-3p, miR-140-5p, miR-199b-5p, miR-378j, miR-361-3p, miR-1285-5p, miR-2447, miR-541-3p, miR-1296-5p, miR-181d-5p, miR-3968, miR-335, miR-490-5p, novel\_82, miR-107-5p, miR-539-5p, miR-9788-3p, miR-455-3p, novel\_4, novel\_78, miR-409b, miR-1343-3p, miR-450b-5p, miR-

NPHS2 ENSOARGO(nephrosi)

KRT14 ENSOARGO(keratin)

miR-4286, miR-29b-2-5p, miR-3064-5p, miR-490-3p, miR-199a-5p, miR-28b, miR-217, miR-339a, miR-3071-3p, miR-30c-2-3p, miR-200c, miR-205-5p, miR-1260a, miR-200a-3p, miR-127-5p, miR-200c-3p, novel\_79, miR-429-3p, miR-6517, miR-299a-3p, miR-2285ad, miR-450a-1-3p, miR-2411-5p, miR-483-3p, miR-30a-5p, miR-23b-5p, miR-29d-3p, miR-200b-3p, miR-193a-5p, miR-6128, miR-1260b, miR-125b-5p, miR-331-3p, miR-100-3p, miR-5100, miR-410-5p, miR-2433, miR-29b-3p, miR-141-3p, miR-215-5p, miR-125a, miR-874-3p, miR-199a-5p, miR-3154, miR-30e-5p, miR-488-3p, miR-671-5p, miR-345-5p, miR-876-3p, let-7f-2-3p, let-7f-2-3p, miR-628-5p, miR-2483-5p, miR-345-5p, let-7j, miR-2285r, miR-146a, miR-224-5p, miR-125a-5p, miR-378a-5p, miR-483-3p, miR-339-5p, miR-133b-5p, miR-3955-5p, miR-3431, miR-3535, miR-450c-3p, miR-27b-3p, miR-16-1-3p, miR-1260b, miR-30b-3p, miR-29b, miR-29c-3p, novel\_101, miR-495-3p, miR-335-5p, miR-199b-5p, miR-24-3p, miR-28c, miR-199c, miR-421-5p, miR-203b-5p, miR-29a, miR-26b-5p, miR-320b, miR-181b-3p, miR-677, miR-6535, miR-29a-3p, miR-299b-3p, miR-378b, miR-150-5p, miR-2285ab, miR-146b-5p, miR-1291, miR-195a-3p, miR-183-5p, miR-2411, miR-146a-5p, miR-130a-5p, miR-125b-2-3p, miR-181b-1-3p, miR-125b, miR-92a-1-5p, novel\_17, miR-26a-5p, miR-30b, miR-299-3p, miR-221-5p, miR-30d, miR-200b, miR-1197-5p, miR-5703, miR-217-5p, miR-2904, miR-215-5p, miR-30c-5p, miR-16-1-3p, miR-425-5p, miR-145a-3p, miR-338-3p, miR-224-5p, miR-29b-2-5p, miR-3604, miR-665, miR-2285j, miR-669a-3p, miR-487a-5p, miR-450b-3p, miR-296-3p, miR-216b-3p, miR-1277-3p, miR-30c-1-3p, miR-221-5p, novel\_32, miR-192-5p, miR-433-3p, miR-30d-5p, miR-450a-1-3p, miR-339b, miR-345-5p, miR-2312, miR-33a-5p, miR-376b, miR-744-3p, miR-382-3p, miR-101b-3p, miR-758-3p, miR-30c-1-3p, miR-323b-3p, novel\_103, miR-103a-2-5p, miR-199b-5p, miR-146b, miR-3085-3p, miR-27a-3p, miR-3529-3p, miR-382-3p, miR-106a-5p, miR-183-5p, miR-345-3p, miR-378d, miR-2285b, miR-2285p, miR-320b, miR-2285af, miR-1260a, miR-422a, miR-106b-5p, miR-130b-3p, miR-320d, miR-107, miR-103a-3p, miR-130a-3p, miR-378h, miR-302a-5p, miR-103, novel\_116, miR-3591-5p, miR-378i, miR-378b, miR-378a-3p, miR-1260b, miR-4429, miR-378c, miR-378c, miR-219a-5p, miR-1260b, miR-301b-3p, miR-378c, miR-5100, miR-20a-5p, miR-320e, novel\_1, miR-379-3p, miR-147-5p, miR-454-3p, miR-378a-3p, miR-2285aa, miR-365a-3p, miR-331-5p, miR-378e, miR-301a-3p, miR-320c, novel\_32, miR-3065-5p, miR-320a, miR-107, miR-378f, miR-20b-5p, miR-7144-5p

miR-24-2-5p, miR-2284y, miR-2285b, miR-2284a, miR-3529-3p, miR-1, miR-4286, miR-6536, novel\_96, miR-152-3p, miR-1260a, miR-2285af, miR-125a-3p, miR-30c-2-3p, miR-217, miR-9-5p, miR-450a-1-3p, miR-545-5p, miR-214-5p, miR-411-3p, miR-128-3p, miR-93, miR-1260b, miR-10b-3p, miR-2284v, miR-6128, miR-410-3p, miR-204-5p, novel\_63, miR-2284k, miR-2433, miR-5100, miR-135a-1-3p, miR-331-3p, miR-144, miR-409-3p, miR-3959-5p, miR-365a-3p, miR-223-5p, miR-574-5p, miR-10b-3p, miR-329a, miR-20b-5p, miR-7144-5p, miR-485-5p, miR-488-3p, miR-93-5p, miR-17-5p, miR-3154, miR-432-3p, miR-2284l, miR-493-5p, miR-193a-3p, miR-224-5p, miR-194a, novel\_51, miR-106a-5p, miR-17-5p, miR-432-5p, miR-2284d, miR-185-5p, miR-3431, miR-20b, miR-2284ab, miR-30b-3p, miR-1260b, miR-4508, miR-2284x, miR-432, miR-1434-3p, miR-3071-5p, novel\_23, miR-145a-5p, miR-194-5p, miR-211, miR-323c, miR-24-3p, novel\_27, miR-2284w, miR-193b-3p, miR-495-3p, miR-2285x, miR-206, novel\_1, miR-379-3p, miR-421-5p, miR-147-5p, miR-20a-5p, miR-33a-3p, miR-146b-3p, miR-144-3p, miR-7-1-3p, miR-410-5p, miR-412-3p, miR-376a-2-5p, miR-6516-3p, miR-148a-3p, miR-216a-3p, miR-3065-5p, miR-376a-5p, miR-29b-1-5p, miR-421-5p, miR-130a-5p, miR-2432, miR-2424, miR-2285w, miR-20a, miR-106a, miR-2284m, miR-760-3p, miR-3653-3p, novel\_17, miR-216a-5p, miR-185-3p, miR-7859, miR-383-5p, miR-148b-3p, miR-222-5p, miR-199a-3p, miR-1247-5p, miR-2284h-5p, miR-548e-3p, miR-106a, novel\_73, miR-2284u, miR-378d, novel\_133, miR-362-3p, miR-1246, miR-2300b-3p, miR-217-5p, miR-140-3p, miR-6525, miR-142a-5p, miR-206-3p, miR-224-5p, miR-338-3p, miR-6134, miR-3958-5p, miR-6516-3p, miR-129-5p, miR-4492, miR-324-3p, miR-132-5p, miR-3604, miR-193b-3p, miR-204-3p, miR-140-5p, miR-545-3p, miR-30c-1-3p, miR-625-5p, miR-133-3p, miR-30c-1-3p, miR-8485, miR-103a, miR-1388-



miR-222-3p, miR-324-3p, miR-338-5p, miR-320e, miR-6516-3p, miR-17-3p, miR-664a, miR-708-5p, miR-424-5p, miR-539-5p, miR-145a-3p, let-7f-1-3p, miR-3613-5p, miR-30f, novel\_99, miR-582-5p, miR-545-3p, miR-21-3p, miR-182-5p, miR-139-5p, miR-204-3p, miR-106a, miR-320d, miR-2284m, miR-299-3p, miR-21-3p, miR-183-5p, miR-216c-5p, miR-20a, miR-2432, miR-126-3p, miR-362-3p, miR-2904, miR-140-3p, miR-5703, miR-4429, miR-19b-3p, let-7a-3p, miR-15a-5p, miR-340-5p, miR-30b-5p, miR-769-5p, miR-2285t, miR-361-3p, miR-3064-5p, miR-452-3p, miR-3082-5p, miR-320b, novel\_115, miR-362-3p, miR-3085-3p, miR-424-5p, miR-106a-5p, miR-30c-1-3p, miR-143-5p, miR-412-3p, miR-125b-2-3p, miR-2300a-5p, miR-9788-3p, miR-221-3p, miR-29b-3p, miR-410-5p, miR-331-3p, miR-3969, miR-410-3p, miR-28-5p, miR-3607-3p, miR-93, miR-323-3p, miR-145-3p, miR-365a-5p, miR-381-3p, miR-17-5p, miR-320a, miR-3154, novel\_48, miR-190a-3p, miR-1814c, miR-769, miR-2284n, miR-2285af, miR-200c, miR-6119-5p, miR-30c-2-3p, miR-339a, miR-17-3p, miR-200c-3p, miR-543-5p, miR-3529-3p, miR-28b, miR-1271-3p, miR-2284a, miR-345-3p, miR-3578, miR-29d-3p, miR-30a-5p, miR-300, miR-200b-3p, miR-128-3p, miR-222, miR-196a-2-3p, miR-7641, miR-24-2-5p, miR-545-5p, miR-214-5p, miR-3613, miR-502-5p, miR-15a, miR-20a-5p, miR-16a, miR-33a-3p, miR-203b-5p, miR-17-3p, miR-24-3p, miR-2387, miR-19a-3p, miR-7975, miR-6516-3p, miR-195a-5p, miR-7-1-3p, miR-29a-3p, miR-330-3p, miR-106a-5p, miR-17-5p, miR-124-5p, miR-101-5p, miR-2483-5p, miR-345-5p, miR-653, miR-29b, miR-2284ab, miR-2284d, miR-20b, let-7b-3p, miR-3604, novel\_74, miR-433-5p, miR-214, miR-769-5p, miR-98-3p, miR-30d-5p, miR-345-5p, miR-339b, miR-186-5p, miR-504-5p, miR-30c-1-3p, miR-582-5p, miR-15b-5p, miR-30b, novel\_17, miR-26a-5p, miR-324-3p, miR-500a-5p, miR-92a-1-5p, miR-345-3p, miR-329a-5p, miR-181b-1-3p, miR-23b, miR-30d-5p, miR-140-5p, miR-30e-5p, miR-30f, miR-136-5p, miR-3074-5p, miR-664b, miR-320e, miR-3604, miR-30b-5p, miR-155-5p, miR-452-5p, miR-193a-5p, miR-3074-5p, miR-346, miR-877-3p, miR-23b-5p, miR-30a-5p, miR-30c-5p, miR-148a-5p, miR-30c, miR-212-5p, novel\_4, miR-105-1, miR-409b, novel\_83, miR-148b-5p, miR-532-3p, miR-2320-3p, miR-23c, miR-23b-3p, miR-30f, miR-105-5p, miR-664-3p, miR-2285p, miR-210-5p, miR-30b, miR-452-5p, miR-30d, miR-23a-3p, miR-200a, miR-145a-3p, miR-363-5p, miR-301b-3p, miR-486-3p, miR-539-3p, miR-4532, miR-296-3p, miR-2285p, miR-296-3p, miR-130b-3p, miR-760-3p, miR-2898, miR-486b-3p, miR-874-5p, miR-454-3p, miR-6517, miR-485-3p, miR-212-5p, miR-130a-3p, miR-2483-3p, miR-487a-3p, miR-421, miR-6535, miR-3154, miR-3963, miR-3120-5p, miR-9851-3p, miR-664-5p

KLF10 ENSOARGO(Kruppel-320a, miR-190a-3p, miR-1814c, miR-769, miR-2284n, miR-2285af, miR-200c, miR-6119-5p, miR-30c-2-3p, miR-339a, miR-17-3p, miR-200c-3p, miR-543-5p, miR-3529-3p, miR-28b, miR-1271-3p, miR-2284a, miR-345-3p, miR-3578, miR-29d-3p, miR-30a-5p, miR-300, miR-200b-3p, miR-128-3p, miR-222, miR-196a-2-3p, miR-7641, miR-24-2-5p, miR-545-5p, miR-214-5p, miR-3613, miR-502-5p, miR-15a, miR-20a-5p, miR-16a, miR-33a-3p, miR-203b-5p, miR-17-3p, miR-24-3p, miR-2387, miR-19a-3p, miR-7975, miR-6516-3p, miR-195a-5p, miR-7-1-3p, miR-29a-3p, miR-330-3p, miR-106a-5p, miR-17-5p, miR-124-5p, miR-101-5p, miR-2483-5p, miR-345-5p, miR-653, miR-29b, miR-2284ab, miR-2284d, miR-20b, let-7b-3p, miR-3604, novel\_74, miR-433-5p, miR-214, miR-769-5p, miR-98-3p, miR-30d-5p, miR-345-5p, miR-339b, miR-186-5p, miR-504-5p, miR-30c-1-3p, miR-582-5p, miR-15b-5p, miR-30b, novel\_17, miR-26a-5p, miR-324-3p, miR-500a-5p, miR-92a-1-5p, miR-345-3p, miR-329a-5p, miR-181b-1-3p, miR-23b, miR-30d-5p, miR-140-5p, miR-30e-5p, miR-30f, miR-136-5p, miR-3074-5p, miR-664b, miR-320e, miR-3604, miR-30b-5p, miR-155-5p, miR-452-5p, miR-193a-5p, miR-3074-5p, miR-346, miR-877-3p, miR-23b-5p, miR-30a-5p, miR-30c-5p, miR-148a-5p, miR-30c, miR-212-5p, novel\_4, miR-105-1, miR-409b, novel\_83, miR-148b-5p, miR-532-3p, miR-2320-3p, miR-23c, miR-23b-3p, miR-30f, miR-105-5p, miR-664-3p, miR-2285p, miR-210-5p, miR-30b, miR-452-5p, miR-30d, miR-23a-3p, miR-200a, miR-145a-3p, miR-363-5p, miR-301b-3p, miR-486-3p, miR-539-3p, miR-4532, miR-296-3p, miR-2285p, miR-296-3p, miR-130b-3p, miR-760-3p, miR-2898, miR-486b-3p, miR-874-5p, miR-454-3p, miR-6517, miR-485-3p, miR-212-5p, miR-130a-3p, miR-2483-3p, miR-487a-3p, miR-421, miR-6535, miR-3154, miR-3963, miR-3120-5p, miR-9851-3p, miR-664-5p

PDE7A ENSOARGO(phosphod-30c, miR-212-5p, novel\_4, miR-105-1, miR-409b, novel\_83, miR-148b-5p, miR-532-3p, miR-2320-3p, miR-23c, miR-23b-3p, miR-30f, miR-105-5p, miR-664-3p, miR-2285p, miR-210-5p, miR-30b, miR-452-5p, miR-30d, miR-23a-3p, miR-200a, miR-145a-3p, miR-363-5p, miR-301b-3p, miR-486-3p, miR-539-3p, miR-4532, miR-296-3p, miR-2285p, miR-296-3p, miR-130b-3p, miR-760-3p, miR-2898, miR-486b-3p, miR-874-5p, miR-454-3p, miR-6517, miR-485-3p, miR-212-5p, miR-130a-3p, miR-2483-3p, miR-487a-3p, miR-421, miR-6535, miR-3154, miR-3963, miR-3120-5p, miR-9851-3p, miR-664-5p

UBFD1 ENSOARGO(ubiquiti-3p, miR-6517, miR-485-3p, miR-212-5p, miR-130a-3p, miR-2483-3p, miR-487a-3p, miR-421, miR-6535, miR-3154, miR-3963, miR-3120-5p, miR-9851-3p, miR-664-5p

LBR ENSOARGO(lamin B :miR-191-5p, miR-129-5p, miR-191

|          |                    |                                                                                                                                                                                                                                                                                                                                                                                                                                                                                                                                                                                                                                                                                                                                                                                                                                                                                                                                                                                                                                                                                                                                                                                                                                                                                                                                                                                                                                                                                                                                                                                                                                                                                                                                                                                                                                                                                                                                                                                                                                                                                                                                                                                                                                                       |
|----------|--------------------|-------------------------------------------------------------------------------------------------------------------------------------------------------------------------------------------------------------------------------------------------------------------------------------------------------------------------------------------------------------------------------------------------------------------------------------------------------------------------------------------------------------------------------------------------------------------------------------------------------------------------------------------------------------------------------------------------------------------------------------------------------------------------------------------------------------------------------------------------------------------------------------------------------------------------------------------------------------------------------------------------------------------------------------------------------------------------------------------------------------------------------------------------------------------------------------------------------------------------------------------------------------------------------------------------------------------------------------------------------------------------------------------------------------------------------------------------------------------------------------------------------------------------------------------------------------------------------------------------------------------------------------------------------------------------------------------------------------------------------------------------------------------------------------------------------------------------------------------------------------------------------------------------------------------------------------------------------------------------------------------------------------------------------------------------------------------------------------------------------------------------------------------------------------------------------------------------------------------------------------------------------|
|          |                    | miR-194-5p, miR-29d-3p, miR-301b-5p, miR-361-5p, miR-21b, miR-128-3p, miR-218-1-3p, miR-29b, miR-199b-3p, miR-548w, novel_121, miR-151-5p, miR-182-5p, miR-194a, miR-30f, miR-26a-5p, miR-224-5p, miR-1a-2-5p, miR-345-3p, miR-1b-5p, miR-3065-3p, miR-22841, miR-125b-2-3p, miR-28b, miR-216a-3p, miR-21a-3p, novel_99, miR-543-3p, miR-182-5p, miR-26b-5p, miR-3065-3p, miR-151b, miR-203-3p, miR-144-5p, miR-29a-3p, miR-365a-3p, miR-301a-5p, miR-28c, miR-29b-3p, miR-1-5p, miR-199c, miR-28-5p, miR-708-5p, miR-874-5p, miR-129-5p, novel_1, miR-29a, miR-3968, miR-144-5p, miR-194b-5p, miR-29c-3p, miR-1a-1-5p, miR-539-5p, miR-2284w, miR-374c-5p, miR-224-5p, miR-142a-5p                                                                                                                                                                                                                                                                                                                                                                                                                                                                                                                                                                                                                                                                                                                                                                                                                                                                                                                                                                                                                                                                                                                                                                                                                                                                                                                                                                                                                                                                                                                                                                   |
| TTC37    | ENSOARGO(tetratri) |                                                                                                                                                                                                                                                                                                                                                                                                                                                                                                                                                                                                                                                                                                                                                                                                                                                                                                                                                                                                                                                                                                                                                                                                                                                                                                                                                                                                                                                                                                                                                                                                                                                                                                                                                                                                                                                                                                                                                                                                                                                                                                                                                                                                                                                       |
| KIAA1033 | ENSOARGO(KIAA1033) | miR-660, miR-124-5p, novel_23, miR-2284h-5p, miR-204-3p, miR-2447, miR-2285w, miR-660-5p<br>miR-1843b-5p, miR-6529a, miR-497-5p, miR-2426, miR-16b, miR-339-5p, miR-409b, miR-103a-3p, miR-103, miR-2459, miR-2285e, miR-185-5p, miR-2285g, miR-16b, miR-182-5p, miR-326, miR-193a-3p, miR-1343-5p, miR-125a-5p, miR-483-3p, miR-1185-5p, miR-23a-3p, miR-494-3p, miR-424-5p, miR-2310, miR-8485, miR-129b-5p, miR-140-5p, miR-195a-5p, miR-6395, miR-107, miR-1291, miR-655-5p, miR-2285u, miR-216b-3p, miR-2483-3p, miR-323a-5p, miR-382-5p, miR-16a, miR-208a-3p, miR-4324, miR-15a, miR-203b-5p, miR-335, miR-3968, miR-499a-5p, miR-219a-5p, let-7i-3p, miR-193b-3p, miR-335-5p, miR-3059-5p, miR-2447, miR-301b-3p, miR-2284w, miR-326-3p, miR-423-5p, miR-330-5p, miR-188-3p, miR-1343-5p, miR-133a-3p, miR-200b-3p, miR-493-3p, novel_79, miR-429-3p, miR-328-3p, miR-151-5p, miR-483-3p, miR-15a-5p, miR-200b, miR-23c, miR-24-2-5p, miR-322-5p, miR-23b-3p, miR-125b, miR-339a, miR-324-3p, miR-200c, miR-208b-3p, miR-205-5p, miR-107, miR-127-5p, miR-466i-5p, miR-200c-3p, miR-2898, miR-664b-3p, miR-23b, miR-485-5p, miR-1827, miR-1814c, miR-23a-5p, miR-339b, miR-2474, miR-182-5p, miR-125a, miR-552-3p, miR-598-3p, miR-370-3p, miR-216b-3p, miR-2355-5p, miR-151b, miR-154b-5p, miR-15b-5p, miR-204-3p, miR-193b-3p, miR-323-5p, miR-301a-3p, miR-125b-5p, miR-410-5p, miR-551b-3p, miR-454-3p, miR-4492, miR-664a, miR-16-5p, miR-6134, miR-3184-5p<br>miR-27a-3p, miR-500-3p, miR-670-3p, miR-3064-5p, miR-4792, miR-3074-5p, miR-10b, miR-504, miR-2387, miR-502-3p, miR-154a, miR-877-3p, miR-362-5p, miR-24-3p, miR-1193, miR-3059-5p, miR-502b, miR-500-5p, miR-149-5p, miR-455-3p, miR-145b, miR-27a-3p, miR-27b-3p, miR-30b-3p, miR-501-3p, miR-145a-5p, miR-30b-3p, miR-19b-2-5p, miR-7b-5p, miR-2113, miR-432-3p, miR-3085-3p, miR-483-3p, miR-3955-3p, miR-7-5p, miR-370-5p, miR-504-5p, miR-23a-5p, novel_99, miR-200a-5p, miR-362-5p, miR-301, miR-6134, miR-193a-5p, miR-425-5p, miR-3074-5p, miR-664a, miR-19b-1-5p, miR-30a-3p, miR-2285j, miR-30e-3p, miR-370-5p, miR-483-3p, miR-30d-3p, miR-501-3p, miR-140-3p, miR-1197-5p, miR-3578, miR-1290, miR-143-3p, miR-3956-5p, miR-450b-5p, miR-3064-5p, miR-30a-3p |
| BMPR1B   | ENSOARGO(bone mor) |                                                                                                                                                                                                                                                                                                                                                                                                                                                                                                                                                                                                                                                                                                                                                                                                                                                                                                                                                                                                                                                                                                                                                                                                                                                                                                                                                                                                                                                                                                                                                                                                                                                                                                                                                                                                                                                                                                                                                                                                                                                                                                                                                                                                                                                       |
| GFER     | ENSOARGO(growth f) |                                                                                                                                                                                                                                                                                                                                                                                                                                                                                                                                                                                                                                                                                                                                                                                                                                                                                                                                                                                                                                                                                                                                                                                                                                                                                                                                                                                                                                                                                                                                                                                                                                                                                                                                                                                                                                                                                                                                                                                                                                                                                                                                                                                                                                                       |

miR-214-3p, miR-130b-3p, miR-2285l, miR-124-5p, miR-32, miR-330-3p, miR-296-3p, miR-296-3p, miR-30c-1-3p, miR-376b, miR-382-3p, miR-6240, miR-1388-3p, miR-125b-1-3p, miR-708-3p, miR-455-3p, miR-539-5p, miR-130a-3p, miR-487b-3p, miR-330-3p, miR-2300a-5p, miR-31-5p, miR-421-5p, miR-335, miR-92a-3p, miR-2285n, miR-301b-3p, novel\_111, miR-877-3p, miR-363-3p, miR-335-5p, miR-3059-5p, miR-376a-2-5p, miR-3963, miR-378j, miR-18a-3p, miR-148a-3p, miR-670-3p, miR-2483-3p, miR-25, miR-7977, miR-664b, miR-24-1-5p, novel\_127, miR-92a-3p, miR-152-3p, miR-21-3p, miR-30c-2-3p, miR-664-3p, miR-486-3p, miR-421-5p, miR-92b-3p, miR-2478, miR-24-2-5p, miR-216c-5p, miR-361-5p, miR-33b-3p, miR-941, miR-5703, miR-188-3p, miR-2300b-3p, novel\_121, miR-545-5p, miR-148b-3p, miR-7859, miR-24-2-5p, miR-6517, miR-18a-3p, miR-486b-3p, miR-487a-5p, miR-454-3p, miR-664a, miR-331-5p, miR-338-5p, miR-664a-5p, miR-132-5p, miR-214, miR-1248, miR-1827, miR-7144-5p, miR-625-5p, miR-876-3p, miR-3154, miR-331-5p, miR-21a-3p, miR-25-3p, miR-301a-3p, miR-532-5p, miR-2285aa, miR-140-5p, miR-30c-1-3p, miR-32-5p, miR-668-3p, miR-380-5p, miR-345-5p, miR-136-3p, miR-7-5p, miR-125a-5p, miR-339-5p, miR-187-3p, miR-31-5p, miR-149-5p, novel\_116, miR-194-3p, miR-185-5p, miR-412-5p, novel\_23, miR-3071-5p, miR-22-3p, miR-2113, miR-7b-5p, miR-708-3p, miR-380-3p, novel\_101, miR-2285x, miR-335-5p, novel\_27, miR-24-3p, miR-206, miR-320b, miR-181b-3p, miR-6535, miR-144-3p, miR-677, miR-411b-3p, miR-323a-5p, miR-150-5p, miR-18b, miR-6395, miR-378f, miR-2319a, miR-1, miR-3064-5p, miR-380-5p, miR-339a, miR-30c-2-3p, miR-125a-3p, miR-200a-3p, miR-450a-2-3p, miR-18b-5p, miR-431, novel\_79, miR-6517, miR-2285ad, novel\_121, miR-129-1-3p, miR-378h, miR-6516-5p, miR-23b-5p, miR-6128, novel\_42, miR-1306-5p, miR-378c, miR-409-3p, miR-125b-5p, miR-144, novel\_63, miR-141-3p, miR-125a, miR-370-3p, miR-874-3p, miR-365a-3p, miR-18a, miR-137-3p, miR-331-5p, miR-2448-3p, miR-1248, miR-3074-1-3p, miR-345-5p, miR-876-3p, miR-10b-3p, miR-676-3p, miR-2330-5p, miR-8485, miR-378d, miR-30c-1-3p, miR-2957, miR-431-5p, miR-3085-3p, miR-181b-2-3p, miR-2300a-5p, miR-421, miR-147a, miR-1a-3p, miR-378b, miR-3120-5p, miR-101a-5p, miR-378c, miR-2447, miR-361-3p, miR-877-3p, miR-2285y, miR-2285n, novel\_82, miR-2285t, miR-335, miR-2319b, miR-3064-5p, miR-4792, miR-203-3p, miR-378e, miR-378j, novel\_94, miR-195a-3p, miR-2285w, miR-183-5p, miR-181b-1-3p, miR-130a-5p, miR-664b-3p, miR-125b, miR-422a, miR-216a-5p, miR-618, miR-21-3p, miR-221-5p, miR-466i-5p, miR-1b-3p, miR-328-3p, novel\_83, miR-2284h-5p, miR-1434-5p, miR-140-3p, miR-378a-3p, miR-378i, miR-133a-3p, miR-4429, miR-129-2-3p, miR-378c, miR-206-3p, novel\_74, miR-221-5p, miR-140-5p, miR-378a-3p, miR-30c-1-3p, novel\_25, miR-22-3p, miR-204-3p, miR-216b-5p, miR-323-5p, miR-6516, miR-21a-3p, novel\_99, miR-18a-5p, miR-345-5p, miR-330b, miR-382-3p, miR-21-3p, miR-181d-5p, miR-2284z, miR-181c-5p, miR-1246, miR-181a-5p, miR-27b-5p, miR-181b-5p, miR-3964, miR-2284aa, miR-490-5p

miR-21b, miR-138, miR-30b-3p, miR-30b-3p, miR-5703, miR-345-3p, miR-214-5p, miR-2284h-5p, miR-151a-3p, miR-330-3p, novel\_96, miR-491-5p, miR-345-3p, miR-2411-3p, miR-330-3p, miR-324-3p, miR-1306-5p, miR-668-3p, miR-6240, miR-504, miR-500a-3p, miR-1306, miR-2284s, miR-7977, miR-504-5p, miR-874-5p, miR-500, miR-656-5p, miR-664a, miR-138-5p, miR-26c, miR-151-3p, miR-338-3p, miR-1197-3p, miR-23b-5p, miR-330-5p, miR-9-5p, miR-322-5p, miR-2284z, novel\_121, miR-486-5p, miR-429-3p, miR-1224-5p, miR-431, miR-219-3p, miR-125a-3p, miR-3064-5p, miR-767, miR-2318, miR-329b, miR-20b-5p, miR-137-3p, miR-93-5p, miR-376c-5p, miR-133c, miR-376c-3p, miR-503-3p, miR-3068-3p, miR-874-3p, miR-1271, novel\_63, miR-1197-3p, miR-16-5p, miR-144-5p, miR-16b, miR-16-1-3p, miR-497-5p, miR-26a-2-3p, miR-2284x, miR-27b-3p, miR-223-3p, miR-2113, miR-22-3p, novel\_23, miR-3535, miR-134-3p, miR-149-5p, miR-31-5p, miR-103a-3p, miR-146a, novel\_51, miR-194a, miR-432-3p, miR-432-3p, miR-6240, miR-493-5p, miR-146b-5p, miR-376b-5p, miR-150-5p, miR-216a-3p, miR-411b-3p, miR-6535, miR-669, miR-144-3p, miR-329-5p, miR-29a, miR-625-3p, miR-6123, miR-576-3p, novel\_87, miR-335-5p, miR-29c-3p, miR-142-3p, miR-33b-3p, miR-16-1-3p, miR-218-1-3p, miR-361-5p, miR-217-5p, miR-23b-3p, miR-23c, miR-2284h-5p, miR-106a, miR-3653-3p, miR-500a-5p, miR-122-3p, miR-376a-5p, miR-376c-3p, miR-2424, miR-380-3p, miR-329a-5p, miR-487a, miR-2285w, miR-625-5p, miR-598-3p, miR-376e-3p, miR-582-5p, miR-15b-5p, miR-552-3p, novel\_74, miR-2285j, miR-219b-3p, miR-769-5p, miR-181c-5p, miR-101c, miR-301b-5p, miR-501-3p, miR-539-5p, miR-147a, miR-376b-3p, miR-2459, miR-1343-3p, novel\_78, miR-330-3p, miR-146b, miR-431-5p, miR-16b, miR-182-5p, miR-106b-5p, miR-2310, miR-574-3p, miR-101b-3p, miR-23a-3p, miR-668-5p, miR-335-3p, miR-376a-3p, miR-493-5p, miR-9-3p, miR-140-5p, miR-378j, miR-25, miR-378g, miR-2483-3p, miR-144-5p, miR-500-3p, miR-139-5p, miR-2285u, miR-211-5p, miR-628-3p, novel\_82, miR-218-5p, miR-2440, miR-101-3p, miR-301a-5p, miR-361-3p, miR-7705, miR-9-5p, miR-200b-3p, miR-128-3p, miR-29d-3p, miR-501-3p, miR-24-2-5p, miR-6516-5p, miR-2411-5p, miR-7641, miR-181b-5p, miR-200c-3p, miR-107, miR-543-

TAF10

ENSOARGO(TAF10 RN

3p,

FBN2

ENSOARGO(fibrilli

23b-3p,

miR-6128, miR-16-5p, miR-6525, miR-30e-3p, miR-125b-5p, miR-30a-3p, novel\_9, miR-708-5p, miR-424-5p, miR-1468-5p, miR-191-5p, miR-28-5p, miR-592, miR-125a, miR-34c-5p, miR-15b-5p, miR-18a, miR-329a, miR-18a-5p, miR-7144-5p, miR-1895, miR-625-5p, novel\_99, miR-1827, miR-671-5p, miR-485-5p, novel\_39, miR-1271-3p, miR-216a-5p, miR-125b, miR-185-3p, miR-2284m, miR-760-3p, miR-34b-5p, novel\_96, miR-431, miR-18b-5p, miR-322-5p, miR-383-5p, miR-7859, miR-15a-5p, miR-328-3p, miR-191, miR-362-3p, miR-2300b-3p, miR-1246, miR-1343-5p, miR-5703, miR-493-3p, miR-33b-3p, miR-664-5p, miR-34a-5p, novel\_60, miR-3956-3p, miR-6527, miR-2284j, miR-323c, miR-24-3p, miR-1285-5p, miR-449a, miR-7705, miR-218-5p, miR-15a, miR-1247-3p, miR-16a, miR-34c, novel\_1, miR-421-5p, miR-378g, miR-411b-3p, miR-34b, miR-18b, miR-1291, miR-6395, miR-195a-5p, miR-6240, miR-424-5p, miR-382, miR-8485, miR-4532, miR-431-5p, miR-330-3p, let-7d-3p, miR-362-3p, miR-16b, miR-491-5p, miR-124-5p, miR-1343-5p, miR-125a-5p, miR-1468, miR-31-5p, miR-330-3p, miR-26b-3p, miR-432-5p, miR-134-3p, miR-147a, miR-185-5p, miR-194-3p, miR-9788-3p, miR-2459, miR-329-3p, miR-432, miR-873a-5p, miR-296-5p, miR-143-5p, miR-2113, miR-2284ab, miR-362-3p, miR-1388-5p, miR-16b, miR-497-5p, miR-3120-5p

RAB2A ENSOARGO(RAB22A, 1 miR-3065-3p, miR-552-3p, miR-7977, miR-532-5p, miR-216a-3p, miR-7134-5p, miR-124-3p, novel\_23, miR-216a-3p, miR-3141, miR-128-3p, novel\_73, miR-219a-5p, miR-665-5p, miR-744-3p, miR-425-5p, miR-124a, miR-3065-3p, miR-3141, miR-425-5p, miR-125a-3p, miR-4726-5p, miR-664a

PARD3 ENSOARGO(par-3 fa) miR-345-5p, miR-758-3p, miR-30c-1-3p, miR-493-5p, miR-574-3p, miR-130b-5p, miR-2285l, miR-455-5p, miR-199a-3p, miR-224-5p, miR-2459, miR-500-5p, miR-6238, miR-455-3p, miR-412-5p, miR-181b-2-3p, miR-1343-3p, miR-455-5p, miR-299a-5p, miR-450b-5p, miR-758-3p, miR-450c-3p, miR-412-3p, miR-143-5p, miR-7705, miR-371b-3p, miR-362-5p, miR-502b, miR-2284q, miR-2285t, novel\_1, miR-371a-5p, miR-769-5p, miR-133a-5p, miR-2440, miR-2285n, miR-181b-3p, miR-677, miR-299b-3p, miR-3120-3p, miR-1983, miR-493-5p, miR-412-3p, miR-3065-5p, miR-150-5p, miR-409-5p, miR-192-3p, miR-200a, miR-181b-1-3p, miR-345-3p, miR-30a-3p, miR-216c-5p, miR-299-3p, miR-200a-3p, miR-221-5p, miR-92a-1-5p, miR-30c-2-3p, miR-219b-5p, novel\_17, miR-2285af, miR-199a-3p, miR-450a-1-3p, miR-222-5p, miR-30d-3p, miR-412, miR-299a-3p, miR-378d, miR-188-3p, miR-3578, miR-145-3p, miR-224-5p, miR-769-5p, miR-500b-5p, miR-133a-3p, miR-145a-3p, miR-130b-5p, miR-450b-3p, miR-30a-3p, miR-100-3p, miR-30e-3p, miR-769, miR-300-3p, miR-141-3p, miR-296-3p, miR-370-3p, miR-874-3p, miR-30c-1-3p, miR-2331-3p, miR-221-5p, miR-186-5p, miR-345-5p, miR-329b, miR-345-5p, miR-133b-3p, miR-3154, miR-362-5p, miR-129b-3p, miR-27b-5p, miR-450a-1-3p, miR-21a-3p

PALB2 ENSOARGO(partner 3p, miR-30a-3p, miR-216c-5p, miR-299-3p, miR-200a-3p, miR-221-5p, miR-92a-1-5p, miR-30c-2-3p, miR-219b-5p, novel\_17, miR-2285af, miR-199a-3p, miR-450a-1-3p, miR-222-5p, miR-30d-3p, miR-412, miR-299a-3p, miR-378d, miR-188-3p, miR-3578, miR-145-3p, miR-224-5p, miR-769-5p, miR-500b-5p, miR-133a-3p, miR-145a-3p, miR-130b-5p, miR-450b-3p, miR-30a-3p, miR-100-3p, miR-30e-3p, miR-769, miR-300-3p, miR-141-3p, miR-296-3p, miR-370-3p, miR-874-3p, miR-30c-1-3p, miR-2331-3p, miR-221-5p, miR-186-5p, miR-345-5p, miR-329b, miR-345-5p, miR-133b-3p, miR-3154, miR-362-5p, miR-129b-3p, miR-27b-5p, miR-450a-1-3p, miR-21a-3p

novel\_103, miR-326, miR-5126, miR-431-5p, miR-1306-5p, miR-342, miR-16b, miR-362-3p, miR-3085-3p, miR-214-3p, miR-101b-3p, miR-424-5p, miR-124a, miR-744-3p, miR-30c-1-3p, miR-8485, miR-484, miR-329-3p, miR-30b-3p, miR-501-3p, miR-362-3p, miR-1388-5p, miR-199b-3p, miR-2300a-5p, miR-1343-3p, miR-409b, miR-27a-3p, miR-222-5p, miR-5010-3p, miR-147a, miR-216a-3p, miR-455-3p, miR-2285n, miR-4726-5p, miR-3968, miR-361-3p, miR-502-3p, miR-361-3p, miR-668-5p, novel\_94, miR-493-5p, miR-2319b, miR-139-5p, miR-3064-5p, miR-500-3p, miR-454-5p, miR-27a-3p, novel\_17, miR-210-5p, miR-125b, miR-324-3p, miR-466i-5p, miR-21-3p, miR-221-5p, miR-30b-3p, miR-5100, miR-125b-2-3p, miR-486-3p, miR-362-3p, miR-2366, miR-2300b-3p, novel\_133, miR-5703, miR-1197-5p, miR-124-3p, miR-2904, miR-33b-3p, miR-16-1-3p, miR-18a-3p, miR-212-5p, miR-15a-5p, miR-532-3p, miR-664a-5p, miR-665, miR-324-3p, miR-664a, miR-4492, miR-424-5p, miR-129-2-3p, miR-145a-3p, miR-214, miR-425-5p, miR-6525, miR-3613-5p, miR-339b, miR-1827, miR-1895, miR-221-5p, miR-30c-1-3p, miR-2331-3p, miR-552-3p, miR-323-5p, miR-139-5p, miR-6516, miR-15b-5p, novel\_32, miR-22-3p, miR-296-3p, miR-7-5p, novel\_51, miR-125a-5p, miR-493-5p, miR-363-5p, miR-296-3p, miR-7b-5p, miR-1285, miR-432, miR-22-3p, miR-1260b, miR-16-1-3p, miR-16b, miR-138, miR-30b-3p, miR-27b-3p, miR-2889, miR-188-5p, miR-497-5p, miR-31-5p, miR-665, miR-339-5p, miR-432-5p, miR-194-3p, miR-3613, miR-15a, miR-16a, miR-199c, miR-656-5p, miR-22-5p, miR-342-3p, miR-371b-3p, miR-24-3p, miR-2428, miR-326-3p, miR-18a-3p, miR-1306, miR-1291, miR-195a-5p, miR-9851-3p, miR-3120-3p, miR-323a-5p, miR-669, miR-8117, miR-1260a, miR-339a, miR-30c-2-3p, miR-2898, miR-200a-3p, novel\_127, miR-181a-2-3p, miR-3064-5p, miR-148b-5p, miR-1271-3p, miR-29a-5p, miR-200a, miR-501-3p, miR-330-5p, miR-

TMED1 ENSOARGO(transmem

miR-3120-5p, miR-101c, miR-143-5p, miR-541, miR-758-3p, miR-501-3p, miR-376b-3p, miR-421, miR-500-5p, miR-455-3p, miR-148b-5p, miR-330-3p, miR-181b-2-3p, miR-27a-3p, miR-5010-3p, miR-199b-5p, miR-182-5p, miR-505, miR-491-3p, miR-758-3p, miR-101b-3p, miR-376b, miR-33a-5p, miR-23a-3p, miR-9-3p, miR-544-5p, novel\_94, miR-376a-3p, miR-199b-5p, miR-3082-5p, miR-25, miR-500-3p, miR-27a-3p, miR-376d, miR-20a-3p, miR-211-5p, miR-3958-3p, miR-3968, miR-628-3p, miR-374a-3p, miR-2440, miR-218-5p, miR-371a-5p, miR-2285y, miR-362-5p, miR-7705, miR-502-3p, miR-9-3p, miR-541-3p, miR-3956-3p, novel\_60, miR-32-3p, miR-190b-5p, miR-33b-3p, miR-148a-5p, miR-34a-5p, miR-361-5p, miR-215-5p, miR-2366, miR-2300b-3p, miR-5703, miR-2904, miR-148b-3p, miR-222-5p, miR-23b-3p, miR-202-5p, miR-34b-5p, miR-618, miR-345-3p, miR-216a-5p, miR-500a-5p, miR-181b-1-3p, miR-130a-5p, miR-664b-3p, miR-2411, miR-1827, novel\_99, miR-3613-5p, miR-450a-1-3p, miR-129b-3p, miR-323-5p, miR-377-3p, miR-192-5p, miR-877-5p, miR-496-3p, miR-32-3p, miR-182-5p, miR-3065-3p, miR-21-3p, miR-487b-5p, miR-6516-3p, miR-17-3p, novel\_74, miR-450b-3p, miR-487a-5p, miR-190a-5p, miR-224-5p, miR-3074-5p, miR-2284ab, miR-188-5p, miR-2284x, novel\_23, miR-2355-3p, miR-149-5p, miR-378a-5p, miR-1343-5p, miR-452-5p, miR-377-3p, miR-224-5p, miR-2411-3p, miR-330-3p, miR-190a, let-7a-2-3p, miR-6240, miR-380-5p, let-7f-2-3p, let-7f-2-3p, miR-668-3p, miR-6516-3p, miR-148a-3p, miR-376b-5p, miR-3591-3p, miR-376b-3p, miR-34b, miR-411b-3p, miR-323a-5p, miR-2404, miR-181b-3p, miR-677, miR-3074-5p, miR-378b, novel\_68, miR-7-1-3p, miR-3120-3p, novel\_1, miR-147-5p, miR-502b, miR-502-5p, miR-3613, miR-382-5p, novel\_87, miR-34c, miR-211, miR-199b-5p, miR-449a, miR-17-3p, miR-3957-3p, let-7a-2-3p, miR-496, miR-1290, miR-3578, miR-345-3p, miR-501-3p, miR-1343-5p, miR-2411-

miR-2310, miR-848b, let-7c-3p, miR-1839-3p, miR-424-5p, miR-494-3p, miR-199b-5p, miR-3955-3p, miR-16b, miR-431-5p, miR-2285e, miR-126a-5p, miR-148b-5p, miR-216a-3p, miR-27a-3p, miR-181b-2-3p, miR-105-1, miR-409b, miR-1343-3p, miR-412-3p, miR-541, miR-1285-5p, miR-877-3p, miR-181d-5p, miR-190b-5p, miR-452-5p, miR-6527, miR-2285f, miR-541-3p, miR-3956-3p, miR-2447, novel\_60, miR-32-3p, miR-335, miR-628-3p, novel\_82, miR-2285n, miR-382-3p, miR-27a-3p, miR-378g, miR-126b-5p, miR-211-5p, miR-664b, miR-544-5p, novel\_94, miR-129b-5p, miR-199b-5p, miR-409-5p, miR-361-3p, miR-2411, miR-125b-2-3p, miR-181b-1-3p, miR-664b-3p, miR-345-3p, miR-329a-5p, miR-216c-5p, miR-30b-3p, miR-221-5p, miR-1277-5p, miR-92a-1-5p, miR-345-3p, miR-216a-5p, miR-618, miR-26a-5p, novel\_83, miR-2284h-5p, miR-340-5p, miR-15a-5p, miR-212-5p, miR-3600, miR-148a-5p, novel\_73, miR-33b-3p, miR-142-3p, miR-1193, miR-1197-5p, miR-1246, miR-181c-5p, miR-6134, miR-122-5p, miR-425-5p, miR-129-2-3p, miR-145a-3p, miR-433-5p, miR-190a-5p, miR-874-5p, miR-424-5p, miR-487b-5p, miR-17-3p, miR-450b-3p, miR-15b-5p, miR-204-3p, novel\_32, miR-296-3p, miR-552-3p, miR-216b-3p, miR-21-3p, miR-370-5p, miR-32-3p, miR-221-5p, novel\_99, miR-2312, miR-2285c, miR-450a-1-3p, miR-2284l, miR-2285r, miR-432-3p, miR-668-3p, miR-483-3p, miR-2411-3p, miR-190a, miR-105-5p, miR-2355-3p, novel\_116, miR-343l, miR-134-3p, miR-2285g, miR-26b-3p, miR-133b-5p, miR-187-3p, miR-27b-3p, miR-497-5p, miR-26a-2-3p, miR-219a-1-3p, miR-16b, miR-450c-3p, miR-181a-5p, miR-1285, miR-1434-3p, miR-873a-5p, miR-199b-5p, miR-323c, miR-211, novel\_101, miR-1193, miR-17-3p, miR-1839-3p, miR-335-5p, novel\_120, miR-22-5p, miR-6119-3p, miR-425-5p, miR-16a, miR-28c, miR-133a-5p, miR-142b, miR-15a, miR-181b-3p, miR-677, miR-670-3p, miR-26b-5p, miR-329-5p, miR-216b-3p, miR-195a-5p, miR-450b-



miR-395b-5p, miR-187-3p, miR-103a-3p, miR-339-5p, miR-2284d, miR-2285g, miR-3431, miR-6238, miR-103, miR-450c-3p, miR-3071-5p, miR-2284ab, miR-16-1-3p, miR-27b-3p, miR-2284x, miR-130b-5p, let-7f-2-3p, let-7f-2-3p, miR-2285r, let-7j, miR-345-5p, miR-377-3p, miR-105-5p, novel\_51, miR-483-3p, miR-196b-5p, miR-193a-3p, miR-378b, miR-655-5p, miR-10a-5p, miR-7-1-3p, miR-374c-3p, miR-144-3p, miR-2285ab, miR-2387, miR-378b, miR-3065-5p, miR-3591-3p, miR-19a-3p, miR-107, miR-2319a, miR-6395, miR-219b-3p, miR-335-5p, miR-193b-3p, miR-2285x, miR-17-3p, miR-371b-3p, miR-323c, miR-374c-5p, miR-502-5p, miR-6529b, miR-6119-3p, miR-206, miR-421-5p, miR-147-5p, miR-2285ad, miR-7641, novel\_79, miR-6516-5p, miR-483-3p, miR-2284z, miR-450a-1-3p, novel\_121, miR-3591-5p, miR-196a-5p, miR-105-2, miR-10a-5p, miR-29b-2-5p, miR-4286, miR-450b-5p, miR-200a, miR-450c-5p, miR-2285b, miR-125a-3p, miR-339a, miR-17-3p, miR-107, miR-487a-3p, miR-503-3p, miR-370-3p, miR-374c-3p, miR-2284n, miR-301, miR-503-3p, miR-10b-3p, miR-345-5p, miR-2318, novel\_48, miR-7144-5p, miR-190a-3p, miR-23a-5p, miR-1306-5p, miR-6128, miR-3607-3p, miR-103b, miR-181c-3p, miR-34c-3p, miR-2284k, miR-144, miR-409-3p, miR-548w, miR-105-1, novel\_78, miR-5010-3p, miR-27a-3p, miR-216a-3p, miR-455-3p, miR-2285e, miR-2459, miR-10b, miR-301b-5p, miR-7857, miR-21b, miR-2284aa, miR-124a, miR-101b-3p, miR-376b, miR-193a, novel\_103, miR-29b-1-5p, miR-10b, miR-2285u, miR-7977, miR-27a-3p, miR-1185-2-3p, miR-409-5p, miR-129b-5p, miR-181a-3p, miR-504, miR-668-5p, miR-335-3p, miR-3059-5p, miR-2285f, miR-452-5p, miR-877-3p, miR-423-5p, miR-154a, miR-2285n, miR-2440, miR-2285y, miR-301a-5p, miR-450a-5p, miR-335, miR-2284q, miR-154-3p, miR-7859, miR-210-3p, miR-532-3p, novel\_83, miR-328-3p, miR-2904, miR-124-3p, miR-140-3p, miR-143a-5p, miR-19b-3p, novel\_73, miR-142-3p, miR-16-1-3p, miR-326, miR-200c, miR-200a-3p, novel\_127, miR-200c-3p, miR-1185-5p, miR-200a, miR-29a-5p, miR-376c-3p, miR-330-5p, miR-200b-3p, miR-299a-5p, miR-3600, miR-429-3p, miR-18a-3p, miR-200b, miR-135a-5p, miR-142b, miR-22-5p, novel\_1, miR-145a-3p, miR-423-5p, miR-3184-5p, miR-326-3p, miR-323c, miR-18a-3p, miR-129b-3p, miR-299, miR-582-5p, novel\_94, miR-135b-5p, miR-126b-5p, miR-141-3p, miR-7689-3p, miR-10b, miR-874-3p, miR-376c-3p, miR-376e-3p, miR-300-3p

ANKRD33 ENSOARGO(ankyrin

ABCD3 ENSOARGO(ATP-bind

miR-873a-5p, miR-432, miR-323b, miR-544a, miR-101a-5p, miR-27b-3p, miR-2284x, miR-330-3p, miR-199b-3p, miR-27a-3p, miR-432-5p, miR-147a, miR-221-3p, miR-1185-3p, miR-320b, miR-32, miR-330-3p, miR-323b-3p, miR-491-5p, miR-199b-5p, miR-193a-3p, miR-6240, miR-101b-3p, miR-363-5p, miR-2483-5p, let-7f-2-3p, let-7f-2-3p, miR-2284b, miR-193a, let-7a-2-3p, miR-199b-5p, miR-221, miR-18b, miR-148a-3p, miR-6516-3p, miR-2284g, miR-452-3p, miR-216b-3p, miR-3120-3p, miR-2404, miR-320c, miR-203-3p, miR-1185-2-3p, miR-27a-3p, miR-218-5p, miR-92a-3p, miR-335, miR-199c, miR-219b-3p, miR-335-5p, miR-885-5p, miR-363-3p, miR-193b-3p, miR-199b-5p, miR-2408, miR-2366, miR-142-3p, miR-4429, miR-2284u, let-7a-2-3p, miR-222, miR-18b-5p, miR-148b-3p, miR-532-3p, miR-214-5p, miR-205-5p, miR-210-5p, miR-125a-3p, miR-2285p, miR-320d, miR-466i-5p, novel\_96, miR-152-3p, miR-92a-3p, miR-21-3p, miR-181a-2-3p, miR-92b-3p, miR-199a-5p, miR-2284y, miR-1957a, miR-3065-3p, miR-143-3p, miR-2284a, miR-30e-5p, miR-503-3p, miR-137-3p, miR-129b-3p, miR-18a, miR-320a, let-7g-3p, miR-18a-5p, miR-1895, miR-32-5p, miR-370-3p, miR-3065-3p, miR-216b-3p, miR-552-3p, miR-544-3p, miR-193b-3p, miR-216b-5p, miR-25-3p, miR-324-5p, miR-199a-5p, miR-222-3p, miR-6128, miR-3607-3p, miR-6525, miR-338-3p

miR-1197-3p, miR-1260b, miR-16-5p, novel\_42, miR-486b-3p, miR-138-5p, miR-5100, miR-2433, miR-1271, miR-542-5p, miR-370-3p, miR-2355-5p, miR-874-3p, miR-574-5p, miR-485-5p, miR-23a-5p, miR-28b, miR-4286, miR-29b-2-5p, miR-3064-5p, miR-152-3p, miR-543-5p, novel\_127, miR-191-3p, miR-2898, miR-2285af, miR-1260a, miR-214-5p, miR-483-3p, miR-505-5p, miR-322-5p, miR-6517, miR-299a-3p, miR-330-5p, miR-23b-5p, miR-1343-5p, miR-7134-5p, miR-615-3p, novel\_27, miR-326-3p, miR-371b-3p, miR-502b, miR-6123, miR-203b-5p, miR-128-1-5p, miR-16a, miR-6529b, miR-28c, miR-15a, miR-6535, miR-677, miR-299b-3p, miR-146b-3p, miR-3074-5p, miR-195a-5p, miR-18a-3p, miR-1306, miR-148a-3p, miR-432-3p, miR-1343-5p, miR-483-3p, miR-190a, miR-149-5p, miR-134-3p, miR-3431, miR-3535, miR-26b-3p, miR-187-3p, miR-31-5p, miR-7862, miR-744-5p, miR-4508, miR-497-5p, miR-16-1-3p, miR-1260b, miR-219a-1-3p, miR-138, miR-16b, miR-30b-3p, miR-22-3p, miR-6134, miR-3184-5p, miR-665-5p, miR-3074-5p, miR-424-5p, miR-190a-5p, miR-4492, miR-874-5p, miR-664a-5p, miR-29b-2-5p, miR-132-5p, miR-15b-5p, novel\_25, miR-22-3p, miR-132-5p, miR-221-5p, miR-2331-3p, miR-129b-3p, miR-486-3p, miR-2887, miR-21-3p, miR-299-3p, miR-221-5p, miR-760-3p, miR-185-3p, miR-1247-5p, miR-15a-5p, miR-148b-3p, miR-18a-3p, miR-16-1-3p, miR-493-3p, miR-5703, miR-2408, miR-423-5p, novel\_111, miR-361-3p, miR-190b-5p, miR-2284q, miR-4726-5p, miR-301a-5p, miR-371a-5p, miR-615, miR-378g, miR-3064-5p, miR-361-3p, miR-4532, miR-424-5p, miR-3085-3p, miR-16b, miR-1306-5p, miR-5126, miR-326, miR-147a, miR-181b-2-3p, miR-30b-3p, miR-301b-5p, miR-4791, miR-484

JMY ENSOARGO( junction

TSC2 ENSOARGO( tuberous

|       |                    |                                                                                                                                                                                                                                                                                                                                                                                                                                                                                                                                                                                                                                                                                                                                                                                                                                                                                                                                                                                                                                                                                                                                                                        |
|-------|--------------------|------------------------------------------------------------------------------------------------------------------------------------------------------------------------------------------------------------------------------------------------------------------------------------------------------------------------------------------------------------------------------------------------------------------------------------------------------------------------------------------------------------------------------------------------------------------------------------------------------------------------------------------------------------------------------------------------------------------------------------------------------------------------------------------------------------------------------------------------------------------------------------------------------------------------------------------------------------------------------------------------------------------------------------------------------------------------------------------------------------------------------------------------------------------------|
| NUAK1 | ENSOARGOC NUAK fam | <p>miR-345-5p, miR-345-5p, miR-339b, miR-1827, miR-21a-3p, miR-129b-3p, miR-27a-5p, miR-376e-3p, miR-365a-3p, miR-193b-3p, miR-376c-3p, miR-2331-3p, miR-3065-3p, miR-21-3p, miR-1271, miR-4492, miR-487a-5p, miR-204-5p, miR-29b-3p, miR-331-3p, miR-1306-5p, miR-539-5p, miR-129-2-3p, miR-214, miR-105-2, miR-133a-3p, miR-29d-3p, miR-188-3p, miR-532-3p, miR-129-1-3p, miR-18a-3p, novel_79, novel_127, miR-6119-5p, miR-339a, miR-450b-5p, miR-376c-3p, miR-3065-3p, miR-192-3p, miR-1291, miR-1306, miR-3591-3p, miR-18a-3p, miR-146b-3p, miR-29a-3p, miR-374c-3p, miR-677, miR-454-5p, novel_68, miR-211-5p, miR-29a, miR-142b, miR-371a-5p, miR-301a-5p, miR-211, miR-193b-3p, miR-29c-3p, miR-29b, miR-1839-5p, miR-4508, miR-188-5p, miR-301b-5p, miR-7857, miR-374b-3p, miR-3431, miR-149-5p, miR-105-1, miR-339-5p, miR-181b-2-3p, miR-26b-3p, miR-214-3p, miR-193a-3p, miR-1306-5p, miR-105-5p, novel_51, miR-345-5p, miR-376b</p>                                                                                                                                                                                                                       |
| TTC34 | ENSOARGOC tetratri | <p>miR-221-5p, miR-299-3p, miR-196a-3p, miR-326, novel_51, miR-877-3p, miR-326-3p, novel_39, miR-2428, miR-1271-3p, miR-1291, miR-6239, miR-1843b-5p, miR-330-5p, miR-299b-3p, miR-669, miR-2459, miR-221-5p, miR-299a-3p, miR-2300a-5p, miR-3969, miR-5100, miR-29b-3p, miR-204-5p, miR-331-5p, miR-16-5p, miR-1306-5p, miR-1197-3p, miR-424-3p, miR-331-5p, miR-1248, miR-876-3p, miR-10b-3p, miR-141-3p, miR-2285aa, miR-3965, miR-769, miR-217, miR-664-3p, miR-376b-3p, miR-200a-3p, miR-127-5p, miR-6536, miR-181b-5p, miR-181a-2-3p, miR-2385-3p, miR-29a-5p, miR-3065-3p, miR-29d-3p, miR-3591-5p, miR-128-3p, miR-376a-5p, miR-545-5p, miR-6516-5p, miR-322-5p, miR-16a, miR-4324, miR-15a, miR-206, miR-29a, miR-6119-3p, miR-29c-3p, miR-335-5p, miR-371b-3p, miR-211, miR-3065-5p, miR-216a-3p, miR-21c, miR-2387, miR-2285ab, miR-376a-2-5p, miR-195a-5p, miR-329-5p, miR-411b-3p, miR-29a-3p, miR-670-3p, miR-330-3p, let-7d-3p, miR-377-3p, miR-7-5p, miR-224-5p, miR-452-5p, miR-382, miR-493-5p, miR-6240, miR-22841, miR-374b-3p, novel_23, miR-7b-5p, miR-1434-3p, miR-542-3p, miR-181a-5p, miR-873a-5p, miR-27b-3p, miR-497-5p, miR-4508, miR-</p> |
| ENAH  | ENSOARGOC enabled  | <p>21-5p, miR-29b, miR-30b-3p, miR-16b, miR-544b, novel_116, miR-2285g, miR-15b-3p, miR-669a-3p, miR-424-5p, miR-3074-2-3p, miR-3184-3p, miR-145a-3p, miR-433-5p, miR-590-3p, miR-181c-5p, miR-224-5p, miR-206-3p, miR-769-5p, miR-433-3p, miR-2285c, miR-543-3p, miR-2312, miR-3065-3p, miR-548o-3p, miR-545-3p, miR-15b-5p, miR-139-5p, miR-216b-5p, miR-544-3p, miR-377-3p, miR-6516, miR-185-3p, miR-2285w, miR-183-5p, miR-329a-5p, miR-2432, miR-29b-1-5p, miR-217-5p, miR-1197-5p, miR-124-3p, novel_133, miR-142-3p, novel_83, miR-532-3p, miR-2284h-5p, miR-15a-5p, miR-769-5p, miR-382-3p, miR-335, miR-181d-5p, miR-452-5p, miR-2285f, miR-3059-5p, miR-7705, novel_111, miR-493-5p, miR-136-5p, miR-211-5p, miR-20a-3p, miR-139-5p, miR-27a-3p, miR-3082-5p, miR-16b, miR-29b-1-5p, miR-505, miR-494-3p, miR-424-5p, miR-101b-3p, miR-124a, miR-491-3p, miR-8485, miR-30b-3p, miR-101c, miR-1839-5p, miR-450b-5p, miR-2126, miR-544a, miR-1388-5p, miR-27a-</p>                                                                                                                                                                                            |

miR-29b-1-5p, miR-181b-1-3p, miR-2411, miR-2432, miR-2424, miR-329a-5p, miR-216c-5p, miR-2285w, miR-20a, miR-106a, miR-1277-5p, novel\_17, miR-26a-5p, miR-219b-5p, miR-422a, miR-616-3p, miR-2284h-5p, miR-106a, miR-212-5p, miR-33b-3p, miR-19b-3p, miR-218-1-3p, miR-16-1-3p, miR-378i, miR-2366, miR-2904, miR-378a-3p, miR-1434-5p, miR-217-5p, miR-1193, miR-378c, miR-145a-3p, miR-4510, miR-3074-2-3p, novel\_74, miR-6516-3p, miR-129-5p, miR-487a-5p, miR-15b-3p, miR-222-3p, miR-19b-1-5p, miR-324-3p, miR-3604, miR-216b-5p, miR-6130, miR-139-5p, novel\_25, miR-378a-3p, miR-548o-3p, miR-21-3p, let-7g-3p, miR-18a-5p, miR-625-5p, miR-186-5p, miR-1827, miR-2285c, miR-433-3p, miR-378d, miR-193a, miR-1b-5p, miR-2310, miR-1388-3p, miR-494-3p, miR-106a-5p, let-7c-3p, miR-33a-5p, miR-376b, miR-2957, miR-29b-1-5p, miR-106b-5p, miR-1298-3p, miR-221-3p, miR-9788-3p, miR-455-3p, miR-2285e, miR-199b-3p, miR-548w, miR-181b-2-3p, miR-27a-3p, miR-378c, miR-3120-5p, miR-6529a, miR-378b, miR-877-3p, novel\_111, miR-8095, miR-212-3p, miR-452-5p, miR-628-3p, miR-335, miR-490-5p, miR-378g, miR-378e, miR-2483-3p, miR-203-3p, miR-27a-3p, miR-139-5p, miR-20a-3p, miR-541-5p, novel\_94, miR-544-5p, miR-221, miR-129b-5p, miR-450b-5p, miR-29a-5p, miR-2285b, miR-1271-3p, miR-181a-2-3p, miR-450a-2-3p, miR-127-5p, miR-107, miR-217, miR-302a-5p, miR-378h, miR-2411-5p, miR-486-5p, miR-222, miR-18b-5p, miR-411-3p, miR-2427, miR-323-3p, miR-93, miR-1197-3p, miR-378c, miR-6128, miR-331-5p, miR-331-3p, miR-300-3p, miR-331-5p, miR-3965, miR-874-3p, miR-2355-5p, miR-10b-3p, miR-329b, miR-2318, miR-7144-5p, miR-20b-5p, miR-1814c, miR-331-5p, miR-93-5p, miR-17-5p, miR-18a, let-7j, miR-197-5p, novel\_51, miR-17-5p, miR-106a-5p, miR-2285g, miR-134-3p, miR-3431, miR-411-5p, miR-103, miR-20b, miR-31-5p, miR-340-3p, miR-103a-3p, miR-29a, miR-28-5p, miR-486b-3p, miR-6123, miR-4492, miR-708-5p, miR-412-5p, miR-29b-3p, miR-769-5p, miR-361-3p, miR-877-3p, miR-769-5p, miR-7705, miR-326-3p, miR-3184-5p, miR-423-5p, miR-3074-5p, miR-29c-3p, miR-18a-5p, let-7g-3p, miR-885-3p, miR-18b, miR-361-3p, miR-18a, miR-129b-3p, miR-29a-3p, miR-769, miR-378g, miR-3074-5p, miR-4792, miR-542-5p, miR-491-5p, miR-21-3p, novel\_96, miR-1343-5p, miR-210-5p, miR-326, miR-412-5p, miR-432-3p, miR-486-3p, novel\_39, miR-2330-5p, miR-181a-2-3p, let-7c-3p, miR-885-3p, miR-29b, miR-30b-3p, miR-148a-5p, miR-101c, miR-330-5p, miR-30b-3p, miR-1193, miR-1343-5p, miR-29d-3p, miR-134-3p, miR-340-5p, miR-421, miR-411b-5p, miR-455-3p, miR-148b-5p, miR-18b-5p

MRPL32

ENSOARGO(mitochon

PLK1

ENSOARGO(polo-lik

miR-212-3p, miR-326-3p, miR-154a, miR-615, miR-142b, miR-450a-5p, miR-320b, miR-10a-5p, miR-26b-5p, miR-323a-5p, miR-7857-3p, miR-144-5p, miR-361-3p, miR-18b, miR-668-5p, miR-504, miR-146b-5p, miR-380-5p, miR-1388-3p, miR-326, miR-146a, miR-505, miR-197-5p, miR-1185-5p, miR-3955-3p, miR-146b, miR-153-3p, miR-151a-3p, miR-432-5p, miR-153, miR-432, miR-10b, miR-181a-5p, miR-539-5p, miR-144-5p, miR-665-5p, miR-10b-5p, miR-323-3p, miR-181c-5p, miR-2285j, miR-135a-1-3p, miR-151-3p, miR-6740-5p, miR-664a-5p, miR-6516-3p, miR-664a, miR-874-5p, miR-486b-3p, miR-504-5p, miR-216b-3p, miR-141-3p, miR-532-5p, miR-10a, miR-323-5p, miR-2448-3p, miR-18a, miR-18a-5p, miR-23a-5p, miR-885-3p, miR-3074-1-3p, miR-380-5p, miR-450b-5p, miR-29a-5p, miR-146a-5p, miR-486-3p, miR-450c-5p, miR-2285af, miR-125a-3p, miR-26a-5p, miR-450a-2-3p, miR-191-3p, miR-6536, miR-200a-3p, miR-548e-3p, miR-18b-5p, miR-615-3p, miR-140-3p, miR-330-5p, miR-885-3p, miR-105-2, miR-664-5p, miR-10a-5p, miR-361-5p, novel\_27, miR-2428, miR-323c, miR-49b-3p, miR-22-5p, miR-656-5p, novel\_1, miR-16a, miR-15a, miR-6402, miR-20a-5p, miR-670-3p, miR-320b, miR-7-1-3p, miR-378b, miR-135b-5p, miR-505-3p, miR-195a-5p, miR-19a-3p, miR-2285ab, miR-18b, miR-2387, miR-296-3p, miR-466f-3p, miR-124-5p, miR-330-3p, miR-190a, miR-106a-5p, miR-17-5p, miR-224-5p, miR-6238, miR-432-5p, miR-130a-3p, miR-26b-3p, miR-377-5p, miR-2284ab, miR-1260b, miR-3071-5p, miR-1434-3p, miR-181a-5p, miR-93, miR-3607-3p, miR-1306-5p, miR-2284n, miR-769, miR-365a-3p, miR-598-3p, miR-141-3p, miR-671-5p, let-7g-3p, miR-18a, miR-3154, miR-320a, miR-2448-3p, miR-1957a, miR-2284a, miR-380-5p, miR-30a-3p, miR-181b-5p, miR-30c-2-3p, miR-1260a, miR-2285af, miR-6119-5p, miR-128-3p, let-7a-2-3p, miR-411-3p, miR-582-3p, miR-30a-5p, miR-8095, miR-2285f, miR-452-5p, miR-181d-5p, miR-212-3p, miR-2284q, miR-371a-5p, miR-769-5p, miR-2285y, miR-2285n, miR-30b-5p, miR-27a-3p, miR-541-5p, miR-3064-5p, miR-20a-3p, miR-193a, miR-491-3p, miR-30c-1-3p, let-7c-3p, miR-376b, miR-494-3p, miR-424-5p, miR-106a-5p, miR-3085-3p, miR-3955-3p, miR-320b, miR-27a-3p, miR-2284aa, miR-2426, miR-450b-5p, miR-484, miR-145a-3p, miR-487a-5p, miR-424-5p, miR-19b-1-5p, miR-369-5p, miR-320e, miR-204-3p, miR-877-5p, miR-21-3p, miR-545-3p, novel\_99, miR-2312, let-7g-3p, miR-18a-5p, miR-30f, miR-27b-5p, miR-146a-5p, miR-2432, miR-20a, miR-30b-3p, miR-21-3p, miR-320d, miR-106a, miR-760-3p, miR-196a-3p, miR-616-3p, miR-532-3p, miR-487a-3p, miR-383-5p, miR-148b-3p, miR-15a-5p, miR-1b-3p, miR-485-3p, miR-505-3p, miR-378d, miR-4429, miR-19b-3p, miR-140-3p, miR-1197-5p, miR-2408, miR-301b-3p, miR-379-3p, miR-677, miR-320c, miR-181b-3p, miR-146b-5p, miR-3591-3p, miR-3065-5p, miR-216a-3p, miR-148a-3p, let-7a-2-3p, miR-380-5p, miR-493-5p, miR-6240, miR-378a-5p, miR-146a, miR-296-3p, miR-411-5p, miR-193a-5p, miR-301b-3p, miR-2440, miR-320e, miR-107-5p, miR-499a-5p, miR-130b-3p, miR-454-3p, miR-103a-2-5p, miR-152-3p, miR-2300a-5p, miR-320b, miR-130a-3p, miR-301a-3p, miR-148b-3p, miR-148a-3p, miR-7144-5p, miR-133a-3p

miR-769-5p, novel\_87, miR-193b-3p, miR-2285x, miR-17-3p, miR-3059-5p, miR-326-3p, miR-301b-3p, miR-362-5p, miR-877-3p, miR-361-3p, miR-150-5p, miR-1306, miR-361-3p, miR-148a-3p, miR-9851-3p, miR-877-3p, miR-96-5p, miR-19a-3p, miR-499b-5p, miR-7977, miR-3074-5p, miR-499a-3p, miR-670-3p, miR-362-3p, novel\_51, miR-1306-5p, miR-377-3p, miR-326, miR-452-5p, miR-660, miR-193a-3p, miR-130b-3p, miR-127-3p, miR-193a, miR-412-3p, miR-22-3p, miR-30b-3p, miR-125b-2-3p, miR-329-3p, miR-7862, miR-30b-3p, miR-138, miR-362-3p, miR-450b-5p, miR-1260b, miR-665, miR-130a-3p, miR-26b-3p, miR-2300a-5p, miR-500-5p, miR-421, miR-412-5p, miR-132-5p, miR-29b-2-5p, miR-454-3p, miR-874-5p, miR-138-5p, miR-664a, miR-767-5p, miR-17-3p, miR-1271, miR-1306-5p, miR-3074-5p, miR-145-3p, miR-500b-5p, miR-769-5p, miR-1197-3p, miR-1260b, miR-362-5p, miR-671-5p, miR-767, miR-329a, miR-1271, miR-660-5p, miR-22-3p, miR-377-3p, miR-301a-3p, miR-499b-3p, miR-193b-3p, miR-769, miR-219b-5p, miR-500a-5p, miR-1260a, novel\_17, miR-152-3p, miR-21-3p, miR-17-3p, miR-29b-2-5p, miR-105-3p, miR-29a-5p, miR-1271-3p, miR-188-3p, miR-1197-5p, miR-330-5p, novel\_133, miR-1246, miR-362-3p, miR-218-1-3p, miR-378d, miR-33b-3p, miR-19b-3p, miR-1b-3p, miR-412, miR-199a-3p, novel\_121, miR-505-5p, miR-222-5p, miR-148b-3p, miR-1271-5p

ARHGEF12 ENSOARGO(Rho guan 5p, miR-7144-5p

DAZAP2 ENSOARGO(DAZ asso miR-7144-5p

miR-3154, miR-381-3p, miR-30e-5p, miR-485-5p, miR-671-5p, miR-1248, miR-7144-5p, miR-23a-5p, miR-345-5p, let-7g-3p, miR-767, miR-615-5p, miR-2355-5p, miR-874-3p, miR-769, miR-374c-3p, miR-331-3p, miR-204-5p, miR-28-5p, miR-767-5p, miR-138-5p, miR-16-5p, miR-378c, miR-1197-3p, miR-330-5p, miR-30a-5p, miR-3578, let-7a-2-3p, miR-30c, miR-431, novel\_79, miR-6517, miR-214-5p, miR-129-1-3p, miR-378h, miR-483-3p, miR-322-5p, miR-505-5p, miR-302a-5p, miR-339a, miR-30c-2-3p, miR-30f, novel\_96, miR-2403, miR-29b-2-5p, novel\_39, miR-378b, miR-195a-5p, miR-378f, miR-9851-3p, miR-1291, miR-320b, miR-6535, miR-374c-3p, novel\_87, miR-16a, miR-15a, miR-502-5p, miR-3957-3p, miR-135a-2-3p, miR-2285m, miR-2428, miR-326-3p, miR-24-3p, miR-211, miR-145a-5p, miR-22-3p, miR-197-3p, miR-542-3p, miR-1285, miR-873a-5p, miR-455-5p, miR-27b-3p, miR-2889, miR-497-5p, miR-16b, miR-138, miR-377-5p, miR-665, miR-339-5p, miR-133b-5p, miR-31-5p, miR-194-3p, miR-185-5p, miR-134-3p, miR-455-5p, miR-483-3p, miR-363-5p, miR-130b-5p, miR-345-5p, let-7a-2-3p, miR-30d-5p, miR-129b-3p, miR-21a-3p, miR-1827, miR-186-5p, miR-625-5p, miR-339b, miR-30f, miR-345-5p, miR-548o-3p, miR-30c-1-3p, miR-140-5p, miR-221-5p, miR-378a-3p, miR-15b-5p, miR-22-3p, novel\_32, miR-204-3p, miR-6130, miR-132-5p, miR-29b-2-5p, miR-132-5p, miR-130b-5p, miR-424-5p, miR-874-5p, miR-708-5p, miR-208b-5p, miR-4492, miR-664a, miR-4510, miR-129-2-3p, miR-378c, miR-769-5p, miR-6525, miR-5703, miR-378a-3p, miR-2904, miR-2366, miR-30c-5p, miR-378i, miR-2284h-5p, miR-199a-3p, miR-15a-5p, miR-210-3p, miR-422a, miR-216a-5p, miR-2285p, miR-30b, miR-21-3p, miR-221-5p, miR-30d, miR-2285w, miR-216c-5p, miR-183-5p, miR-143-3p, miR-377-5p, miR-125b-2-3p, miR-129b-5p, miR-140-5p, miR-877-3p, miR-136-5p, miR-7977, miR-211-5p, miR-499b-5p, miR-27a-3p, miR-4443, miR-2482-3p, miR-3082-5p, miR-489, miR-

miR-228bj, miR-487b-5p, miR-454-3p, miR-590-3p, miR-3184-3p, miR-3074-5p, miR-6525, miR-224-5p, miR-181c-5p, miR-2285c, miR-129b-3p, miR-487b-5p, miR-30d-5p, miR-32-5p, miR-154a-3p, miR-552-3p, miR-499b-3p, miR-377-3p, miR-301a-3p, miR-30b, miR-422a, miR-3653-3p, miR-487a, miR-345-3p, miR-376a-5p, miR-380-3p, miR-30c-5p, miR-378i, miR-378a-3p, miR-217-5p, miR-1434-5p, novel\_73, miR-142-3p, miR-2284u, miR-18a-3p, miR-7859, miR-23b-3p, miR-23c, miR-2440, miR-154-3p, miR-363-3p, miR-9-5p, miR-2284j, miR-877-3p, miR-7705, miR-221, miR-668-5p, miR-1983, miR-24-1-5p, miR-2284g, miR-139-5p, miR-2285u, miR-211-5p, miR-25, miR-499a-3p, miR-378g, miR-3596, miR-144-5p, miR-1185-2-3p, miR-199a-3p, miR-431-5p, miR-505, miR-29b-1-5p, miR-491-5p, miR-130b-3p, miR-487b-5p, miR-146b, miR-153-3p, miR-124a, miR-101b-3p, miR-2284b, miR-378d, miR-1b-5p, miR-329-3p, miR-541, miR-1a-3p, miR-758-3p, miR-362-3p, miR-1388-5p, miR-21b, miR-199b-3p, miR-153, miR-425-3p, miR-147a, miR-126a-5p, miR-1185-3p, miR-2284k, miR-494-5p, miR-100-3p, miR-28a-3p, miR-2284v, miR-144-5p, miR-30e-5p, miR-876-3p, miR-2318, miR-329a, miR-3068-3p, miR-2285aa, miR-25-3p, miR-205-5p, miR-30f, miR-3071-3p, miR-28-3p, miR-6536, miR-127-5p, miR-1a-2-5p, miR-200a-3p, novel\_127, miR-152-3p, novel\_96, miR-92b-3p, miR-200a, miR-2284y, miR-2285b, miR-30c, miR-2285ad, miR-429-3p, miR-431, miR-9-5p, miR-2284z, novel\_121, miR-1247-3p, miR-142b, miR-206, miR-1a-1-5p, miR-301b-3p, miR-148a-3p, miR-3591-3p, miR-3065-5p, miR-216a-3p, miR-412-3p, miR-146b-5p, miR-378f, miR-3074-5p, miR-3120-3p, miR-144-3p, miR-677, miR-146a, miR-105-5p, miR-32, let-7f-2-3p, let-7f-2-3p, miR-19b-2-5p, miR-708-3p, miR-542-3p, miR-22-3p, miR-188-5p, miR-27b-3p, miR-2284x, miR-134-3p, miR-222-3p, miR-19b-1-5p, miR-338-5p, miR-17-3p, miR-539-5p, miR-378c, miR-125-



miR-361-3p, miR-199b-5p, miR-378e, miR-499b-5p, miR-7977, miR-3064-5p, miR-10b, miR-2285t, miR-335, miR-769-5p, miR-2285y, miR-107-5p, miR-2285n, miR-382-3p, miR-2285f, miR-452-5p, novel\_60, miR-3059-5p, miR-541-3p, miR-212-3p, miR-3120-5p, miR-378c, miR-30b-3p, miR-378b, miR-484, miR-6529a, miR-296-5p, miR-10b, miR-216a-3p, novel\_4, miR-409b, miR-3085-3p, miR-25-5p, miR-3955-3p, miR-2957, miR-342, miR-320b, miR-326, novel\_103, miR-758-3p, miR-30c-1-3p, miR-652-5p, miR-106a-5p, miR-2330-5p, novel\_99, miR-2312, miR-18a-5p, miR-22-3p, miR-204-3p, miR-6130, miR-323-5p, miR-370-5p, miR-532-5p, miR-378a-3p, miR-660-5p, miR-708-5p, miR-208b-5p, miR-450b-3p, miR-6516-3p, miR-664a, miR-324-3p, miR-132-5p, miR-338-5p, miR-6134, miR-10b-5p, miR-206-3p, miR-378c, miR-4510, miR-378d, miR-4429, miR-1197-5p, miR-140-3p, miR-383-5p, miR-200b, miR-340-5p, miR-34b-5p, miR-30b-3p, miR-299-3p, miR-106a, miR-466i-5p, miR-760-3p, miR-125b, miR-185-3p, miR-2411, miR-20a, miR-183-5p, miR-216c-5p, miR-6516-3p, miR-6395, miR-450b-3p, miR-1291, miR-107, miR-18a-3p, miR-2285ab, miR-18b, miR-323a-5p, miR-34b, miR-10a-5p, miR-378b, miR-656-5p, miR-203b-5p, miR-34c, miR-20a-5p, miR-133a-5p, miR-449a, novel\_27, miR-326-3p, miR-1193, novel\_101, miR-342-3p, miR-455-5p, miR-30b-3p, miR-138, miR-873a-5p, miR-1285, miR-20b, miR-103, miR-432-5p, miR-185-5p, miR-125a-5p, miR-660, miR-124-5p, miR-17-5p, miR-106a-5p, miR-455-5p, miR-224-5p, miR-345-5p, miR-654-3p, miR-363-5p, miR-130b-5p, miR-7144-5p, miR-485-5p, miR-18a, miR-3154, miR-17-5p, miR-320a, miR-488-3p, miR-199a-5p, miR-154b-5p, miR-34c-5p, miR-3965, miR-769, miR-370-3p, miR-615-5p, miR-486b-3p, miR-28-5p, miR-138-5p, miR-331-3p, miR-1-5p, miR-370-5p, miR-378c, miR-93, miR-3607-3p, miR-200b-3p, miR-128-3p, miR-10a-5p, miR-582-3p, miR-345-3p, miR-214-5p, miR-24-2-5p, miR-2887, miR-20a, miR-2285i, miR-2284a, miR-2284y, miR-376b-3p, miR-196a-3p, miR-106a, miR-212-5p, miR-1271-5p, miR-330-5p, miR-1343-5p, miR-2904, miR-142-3p, miR-2284u, miR-664-5p, miR-4510, miR-103b, miR-1271, novel\_44, miR-6134, miR-145-3p, miR-135a-5p, miR-4492, miR-140-5p, miR-1271, miR-6130, miR-17-5p, miR-93-5p, miR-671-5p, miR-106a-5p, miR-2284b, miR-326, miR-342, miR-17-5p, novel\_19, miR-2285v, miR-2285l, miR-1343-5p, miR-376b-3p, miR-185-5p, miR-216a-3p, novel\_116, miR-873a-5p, miR-30b-3p, miR-30b-3p, miR-188-5p, miR-342-3p, miR-495-3p, miR-2428, miR-326-3p, miR-20a-5p, miR-4726-5p, miR-128-1-5p, miR-2284g, novel\_69, miR-670-3p, miR-376d, miR-203-3p, miR-6535, miR-140-5p, miR-376b-3p, miR-3065-5p, miR-2285k, miR-96-5p, miR-877-3p, miR-135b-5p, miR-376a-3p

HTR2C ENSOARGO( 5-hydrox 3p, miR-2319a, miR-379-5p, miR-18a-3p, miR-670-3p, miR-34b, miR-26b-5p, miR-363, miR-378b, miR-92a-3p, novel\_1, miR-34c, miR-33a-3p, miR-20a-5p, miR-449a, miR-374c-5p, miR-326-3p, miR-2284w, miR-323c, miR-495-3p, miR-219b-3p, miR-2284ab, miR-450c-3p, miR-145a-5p, miR-653, miR-1434-3p, miR-185-5p, miR-187-3p, miR-105-5p, miR-2284l, miR-380-5p, miR-190a-3p, miR-7144-5p, miR-767, miR-93-5p, miR-23b, miR-2448-3p, miR-300-3p, miR-34c-5p, miR-331-5p, miR-25-3p, miR-141-3p, miR-874-3p, miR-767-5p, miR-6740-5p, novel\_63, miR-410-5p, miR-2332, miR-5100, miR-93, miR-1197-3p, miR-105-2, miR-330-5p, miR-501-3p, miR-1290, miR-545-5p, miR-450a-1-3p, novel\_121, miR-302a-5p, miR-6516-5p, miR-7641, miR-1224-5p, miR-412, miR-2285ad, novel\_127, miR-200a-3p, miR-92a-3p, miR-450a-2-3p, miR-191-3p, miR-6536, miR-30f, miR-92b-3p, miR-380-5p, miR-450b-5p, miR-148b-5p, novel\_94, miR-140-5p, miR-203-3p, miR-500-3p, miR-2483-3p, miR-541-5p, miR-2319b, miR-628-3p, miR-2285y, miR-107-5p, miR-2285n, miR-8095, miR-1285-5p, miR-502-3p, miR-7705, miR-363-3p, miR-1839-5p, miR-1388-5p, miR-501-3p, miR-412-3p, miR-296-5p, miR-148b-5p, miR-9788-3p, miR-455-3p, miR-145b, miR-105-1, novel\_4, miR-103a-2-5p, miR-3955-3p, miR-505, miR-106b-5p, novel\_103, miR-326, miR-8485, miR-193a, miR-2310, miR-23a-3p, miR-652-5p, miR-124a, miR-543-3p, miR-625-5p, miR-411, miR-450a-1-3p, novel\_25, miR-6516, miR-6130, miR-216b-3p, miR-140-5p, miR-2331-3p, miR-450b-3p, novel\_74, miR-6516-3p, miR-324-3p, miR-3074-2-3p, miR-4510, miR-34a-5p, miR-148a-5p, miR-124-3p, miR-193b-5p, miR-1246, miR-532-3p, miR-23b-3p, miR-23c, miR-18a-3p, miR-3653-3p, miR-34b-5p, miR-466i-5p, miR-216a-5p, miR-26a-5p, miR-2432, miR-20a

miR-219-3p, miR-181b-5p, miR-1a-2-5p, miR-17-3p, miR-92a-3p, novel\_96, novel\_127, miR-200a-3p, miR-4286, miR-181a-2-3p, miR-2385-3p, miR-30a-3p, miR-3064-5p, miR-92b-3p, miR-2284a, miR-490-3p, miR-199a-5p, miR-2284y, miR-330-5p, miR-1343-5p, miR-496, miR-322-5p, miR-2284z, miR-450a-1-3p, miR-2284k, miR-2284v, miR-3607-3p, miR-16-5p, miR-1197-3p, miR-503-3p, miR-320a, miR-137-3p, miR-329a, miR-7144-5p, miR-503-3p, miR-874-3p, miR-1271, miR-615-5p, miR-141-3p, miR-370-3p, miR-769, miR-3965, miR-25-3p, miR-374c-3p, miR-199a-5p, miR-377-3p, miR-32, miR-1343-5p, miR-432-3p, miR-181a-5p, miR-2113, miR-374b-3p, miR-3071-5p, miR-145a-5p, miR-450c-3p, miR-22-3p, miR-16-1-3p, miR-2284ab, miR-16b, miR-2284x, miR-497-5p, miR-340-3p, miR-134-3p, miR-2284d, miR-2355-3p, miR-149-5p, miR-15a, miR-33a-3p, miR-16a, miR-92a-3p, miR-147-5p, miR-219b-3p, novel\_101, miR-17-3p, miR-3957-3p, miR-199b-5p, miR-326-3p, novel\_27, miR-2285ab, miR-18a-3p, miR-19a-3p, miR-2285k, miR-195a-5p, novel\_68, miR-374c-3p, miR-320c, novel\_17, miR-500a-5p, miR-320d, miR-105-3p, miR-183-5p, miR-195a-3p, miR-664b-3p, miR-2285i, miR-2432, miR-2424, miR-362-3p, miR-193b-5p, miR-5703, miR-2904, miR-142-3p, miR-19b-3p, miR-4429, miR-16-1-3p, miR-18a-3p, miR-30d-3p, miR-15a-5p, miR-30e-3p, miR-665, miR-30a-3p, miR-219b-3p, miR-17-3p, miR-450b-3p, miR-424-5p, miR-769-5p, miR-181c-5p, miR-6134, miR-450a-1-3p, novel\_99, miR-1827, miR-543-3p, miR-496-3p, miR-32-5p, miR-377-3p, miR-15b-5p, novel\_25, miR-204-3p, miR-22-3p, miR-326, miR-320b, miR-16b, miR-362-3p, miR-487b-5p, miR-491-5p, miR-3085-3p, miR-199b-5p, miR-424-5p, miR-494-3p, miR-1388-3p, miR-2284b, miR-33a-5p, let-7c-3p, miR-491-3p, miR-541, miR-329-3p, miR-2426, miR-362-3p, miR-2284aa, miR-101c, novel\_4, miR-145b, miR-216a-3p, miR-769-5p, miR-3068, miR-190-5p, miR-885-5p, miR-16b, miR-30b-3p, miR-1260b, miR-497-5p, miR-7144-5p, miR-1827, miR-195a-5p, miR-1814c, miR-30b-3p, miR-322-5p, miR-15a-5p, miR-139-5p, miR-203-3p, miR-15b-5p, miR-139-5p, miR-452-3p, miR-2355-5p, miR-424-5p, miR-1260a, miR-15a, miR-16a, miR-500a-5p, miR-16b, miR-1260b, miR-2310, miR-424-5p, let-7c-3p, miR-16-5p

SLC44A3 ENSOARGO(solute c

CSRNP2 ENSOARGO(cysteine

miR-449a, miR-326-3p, miR-1193, miR-135a-2-3p, miR-342-3p, miR-199c, let-7i, miR-34c, miR-6402, miR-20a-5p, miR-34b, miR-670-3p, miR-7-1-3p, miR-320b, miR-135b-5p, miR-9851-3p, miR-18a-3p, miR-345-5p, miR-101-5p, miR-466f-3p, miR-106a-5p, miR-455-5p, miR-17-5p, miR-2355-3p, miR-20b, let-7g-5p, miR-2284d, miR-26b-3p, miR-665, miR-455-5p, miR-30b-3p, miR-145a-5p, miR-181a-5p, miR-1434-3p, miR-873a-5p, miR-145-3p, miR-93, miR-133a-3p, miR-3607-3p, miR-486b-3p, miR-28-5p, miR-135a-5p, miR-135a-1-3p, miR-370-5p, miR-2284n, miR-154b-5p, miR-199a-5p, miR-34c-5p, miR-1814c, miR-485-5p, miR-7144-5p, miR-190a-3p, miR-10b-3p, miR-17-5p, miR-3154, miR-2448-3p, miR-488-3p, miR-199a-5p, miR-380-5p, miR-181a-2-3p, miR-4286, miR-29b-2-5p, miR-181b-5p, miR-450a-2-3p, miR-2898, miR-217, let-7c-5p, miR-6119-5p, miR-582-3p, miR-105-2, miR-128-3p, let-7d, miR-582-3p, miR-30a-5p, miR-218-2-3p, miR-134, miR-345-3p, miR-154a, miR-181d-5p, miR-3059-5p, novel\_60, miR-335, miR-371a-5p, miR-27a-3p, let-7d-5p, miR-7857-3p, miR-541-5p, miR-499b-5p, novel\_94, miR-199b-5p, miR-491-3p, miR-106a-5p, miR-382-3p, let-7a-5p, let-7e, novel\_124, miR-2957, miR-326, miR-342, miR-216a-3p, miR-222-5p, miR-27a-3p, miR-5010-3p, miR-151a-3p, miR-105-1, novel\_4, miR-2300a-5p, miR-3120-5p, miR-2426, miR-30b-3p, miR-3962, let-7b-5p, miR-3074-2-3p, miR-145a-3p, miR-708-5p, miR-208b-5p, miR-450b-3p, miR-29b-2-5p, miR-324-3p, novel\_32, miR-139-5p, miR-21-3p, miR-370-5p, novel\_99, miR-582-5p, miR-30f, let-7g-3p, miR-133b-3p, miR-21a-3p, miR-29b-1-5p, miR-20a, miR-183-5p, miR-34b-5p, miR-30d, miR-30b-3p, miR-466i-5p, miR-2284m, miR-106a, miR-185-3p, miR-532-3p, miR-148b-3p, miR-383-5p, miR-3600, miR-1197-5p, miR-140-3p, miR-188-3p, miR-199b-5p, miR-2284w, miR-335-5p, miR-576-3p, miR-1247-3p, miR-181b-3p, miR-677, miR-3074-5p, miR-216b-

miR-28c, let-7i, miR-6119-3p, miR-502b, novel\_101, miR-17-3p, miR-1193, miR-24-3p, miR-371b-3p, miR-2285m, miR-326-3p, miR-2285ab, miR-216a-3p, miR-1306, miR-150-5p, miR-1291, let-7e-5p, miR-9851-3p, novel\_68, miR-320b, miR-411b-3p, miR-2404, miR-320c, novel\_51, miR-196b-5p, miR-378a-5p, miR-125a-5p, miR-363-5p, miR-432-3p, miR-2285r, miR-345-5p, let-7j, miR-223-3p, miR-1434-3p, novel\_23, miR-145a-5p, miR-125b-1-3p, miR-188-5p, miR-4508, miR-339-5p, let-7g-5p, miR-3431, miR-412-5p, miR-2285g, novel\_116, miR-370-5p, miR-6740-5p, miR-125b-5p, miR-28-5p, miR-486b-3p, miR-424-3p, miR-320a, miR-345-5p, miR-329b, miR-485-5p, miR-671-5p, miR-574-5p, miR-125a, miR-2285aa, miR-376c-3p, miR-125a-3p, miR-8117, let-7c-5p, miR-339a, let-7f-5p, miR-450a-2-3p, miR-17-3p, miR-2898, miR-28b, miR-490-3p, let-7g, miR-3578, miR-196a-5p, miR-330-5p, let-7d, miR-885-3p, miR-128-3p, miR-6517, novel\_79, miR-412, miR-1271-5p, miR-505-5p, miR-3968, miR-2285t, miR-3956-3p, miR-541-3p, miR-212-3p, novel\_60, miR-2285f, novel\_111, miR-877-3p, miR-361-3p, miR-361-3p, miR-504, miR-96-5p, miR-299b-5p, miR-544-5p, miR-877-3p, miR-452-3p, miR-7977, miR-489, miR-3596, miR-4443, let-7d-5p, miR-326, miR-1306-5p, miR-320b, miR-3955-3p, miR-1185-5p, let-7e, let-7a-5p, miR-652-5p, miR-541, miR-296-5p, miR-412-3p, miR-299a-5p, novel\_4, miR-1343-3p, miR-145b, miR-2285e, miR-9788-3p, miR-2285j, let-7f, miR-320e, miR-665, miR-17-3p, miR-664a, miR-708-5p, miR-3184-3p, miR-4510, let-7b, miR-539-5p, miR-3074-2-3p, miR-1271, miR-6525, miR-122-5p, let-7b-5p, miR-2285c, miR-129b-3p, miR-27b-5p, miR-339b, miR-345-5p, miR-885-3p, miR-2331-3p, miR-221-5p, miR-504-5p, miR-370-5p, miR-6130, miR-132-5p, miR-376e-3p, let-7i-5p, miR-210-5p, novel\_17, miR-125b, miR-185-3p, miR-500a-5p, miR-324-3p, miR-98-5p, miR-760-3p, miR-320d, let-7g, miR-362-3p, miR-1306-5p, miR-431-5p, miR-199a-3p, miR-466f-3p, miR-153-3p, miR-487b-5p, miR-101b-3p, miR-380-5p, miR-7857, miR-329-3p, miR-27b-3p, miR-2284aa, miR-362-3p, miR-27a-3p, miR-665, miR-199b-3p, miR-1185-3p, miR-2459, miR-9788-3p, miR-6238, miR-153, miR-2285y, miR-371a-5p, miR-101-3p, miR-2285n, miR-199c, miR-2284q, miR-3958-3p, miR-2285x, miR-32-3p, miR-1306, miR-140-5p, miR-2285u, miR-20a-3p, miR-1185-2-3p, miR-27a-3p, miR-144-3p, miR-670-3p, miR-323a-5p, miR-499a-3p, miR-2285b, miR-380-5p, miR-188-3p, miR-218-2-3p, miR-362-3p, miR-3591-5p, miR-361-5p, miR-300, miR-431, miR-2285ad, miR-199a-3p, miR-2284z, miR-532-3p, miR-340-5p, miR-144, miR-34c-3p, miR-28-5p, miR-874-5p, miR-708-5p, miR-2448-3p, miR-381-3p, miR-329a, miR-532-5p, miR-32-3p, miR-323-5p, miR-499b-3p

LDB1 ENSOARGO(LIM doma 3p, miR-6517, novel\_79, miR-412, miR-1271-5p, miR-505-5p, miR-3968, miR-2285t, miR-3956-3p, miR-541-3p, miR-212-3p, novel\_60, miR-2285f, novel\_111, miR-877-3p, miR-361-3p, miR-361-3p, miR-504, miR-96-5p, miR-299b-5p, miR-544-5p, miR-877-3p, miR-452-3p, miR-7977, miR-489, miR-3596, miR-4443, let-7d-5p, miR-326, miR-1306-5p, miR-320b, miR-3955-3p, miR-1185-5p, let-7e, let-7a-5p, miR-652-5p, miR-541, miR-296-5p, miR-412-3p, miR-299a-5p, novel\_4, miR-1343-3p, miR-145b, miR-2285e, miR-9788-3p, miR-2285j, let-7f, miR-320e, miR-665, miR-17-3p, miR-664a, miR-708-5p, miR-3184-3p, miR-4510, let-7b, miR-539-5p, miR-3074-2-3p, miR-1271, miR-6525, miR-122-5p, let-7b-5p, miR-2285c, miR-129b-3p, miR-27b-5p, miR-339b, miR-345-5p, miR-885-3p, miR-2331-3p, miR-221-5p, miR-504-5p, miR-370-5p, miR-6130, miR-132-5p, miR-376e-3p, let-7i-5p, miR-210-5p, novel\_17, miR-125b, miR-185-3p, miR-500a-5p, miR-324-3p, miR-98-5p, miR-760-3p, miR-320d, let-7g, miR-362-3p, miR-1306-5p, miR-431-5p, miR-199a-3p, miR-466f-3p, miR-153-3p, miR-487b-5p, miR-101b-3p, miR-380-5p, miR-7857, miR-329-3p, miR-27b-3p, miR-2284aa, miR-362-3p, miR-27a-3p, miR-665, miR-199b-3p, miR-1185-3p, miR-2459, miR-9788-3p, miR-6238, miR-153, miR-2285y, miR-371a-5p, miR-101-3p, miR-2285n, miR-199c, miR-2284q, miR-3958-3p, miR-2285x, miR-32-3p, miR-1306, miR-140-5p, miR-2285u, miR-20a-3p, miR-1185-2-3p, miR-27a-3p, miR-144-3p, miR-670-3p, miR-323a-5p, miR-499a-3p, miR-2285b, miR-380-5p, miR-188-3p, miR-218-2-3p, miR-362-3p, miR-3591-5p, miR-361-5p, miR-300, miR-431, miR-2285ad, miR-199a-3p, miR-2284z, miR-532-3p, miR-340-5p, miR-144, miR-34c-3p, miR-28-5p, miR-874-5p, miR-708-5p, miR-2448-3p, miR-381-3p, miR-329a, miR-532-5p, miR-32-3p, miR-323-5p, miR-499b-3p

NFE2L2 ENSOARGO(nuclear 3p, miR-1306, miR-140-5p, miR-2285u, miR-20a-3p, miR-1185-2-3p, miR-27a-3p, miR-144-3p, miR-670-3p, miR-323a-5p, miR-499a-3p, miR-2285b, miR-380-5p, miR-188-3p, miR-218-2-3p, miR-362-3p, miR-3591-5p, miR-361-5p, miR-300, miR-431, miR-2285ad, miR-199a-3p, miR-2284z, miR-532-3p, miR-340-5p, miR-144, miR-34c-3p, miR-28-5p, miR-874-5p, miR-708-5p, miR-2448-3p, miR-381-3p, miR-329a, miR-532-5p, miR-32-3p, miR-323-5p, miR-499b-3p

HNRNPA3 ENSOARGO(heteroge: novel\_27, miR-670-3p, miR-2285r, miR-3071-5p

|      |                     |                                                                                                                                                                                                                                                                                                                                                                                                                                                                                                                                                                                                                                                                                                                                                                                                                                                                                                                                                                                                                                                                                                                                                                                                                                                                                                                                                                                                                                                                                                                                                                                                                                                                                                                                                                                                                                                                                                                                                                                                                                                                                                                                                                                                                                                                                                                                                                                                                                                                                                                                                                                                                                                                                                                                                                                                                                                                                                                                                                                                       |
|------|---------------------|-------------------------------------------------------------------------------------------------------------------------------------------------------------------------------------------------------------------------------------------------------------------------------------------------------------------------------------------------------------------------------------------------------------------------------------------------------------------------------------------------------------------------------------------------------------------------------------------------------------------------------------------------------------------------------------------------------------------------------------------------------------------------------------------------------------------------------------------------------------------------------------------------------------------------------------------------------------------------------------------------------------------------------------------------------------------------------------------------------------------------------------------------------------------------------------------------------------------------------------------------------------------------------------------------------------------------------------------------------------------------------------------------------------------------------------------------------------------------------------------------------------------------------------------------------------------------------------------------------------------------------------------------------------------------------------------------------------------------------------------------------------------------------------------------------------------------------------------------------------------------------------------------------------------------------------------------------------------------------------------------------------------------------------------------------------------------------------------------------------------------------------------------------------------------------------------------------------------------------------------------------------------------------------------------------------------------------------------------------------------------------------------------------------------------------------------------------------------------------------------------------------------------------------------------------------------------------------------------------------------------------------------------------------------------------------------------------------------------------------------------------------------------------------------------------------------------------------------------------------------------------------------------------------------------------------------------------------------------------------------------------|
| ALS2 | ENSOARGO(amyotrop.) | <p>miR-200a-5p, miR-2285c, miR-450a-1-3p, miR-21a-3p, miR-7144-5p, miR-2318, miR-3956, miR-141-3p, miR-21-3p, miR-874-3p, miR-15b-5p, miR-199a-5p, miR-365a-3p, miR-6516, miR-34c-3p, miR-134-5p, miR-130b-5p, miR-204-5p, miR-424-5p, miR-4492, miR-450b-3p, miR-665-5p, miR-16-5p, miR-2284v, miR-590-3p, miR-134, miR-2284u, miR-3600, miR-2284z, miR-450a-1-3p, miR-134-5p, miR-15a-5p, miR-6516-5p, miR-322-5p, miR-185-3p, miR-26a-5p, miR-200a-3p, miR-21-3p, miR-3653-3p, miR-202-5p, miR-2284a, miR-200a, miR-29a-5p, miR-2284y, miR-199a-5p, miR-3591-3p, miR-2387, miR-199b-5p, miR-195a-5p, miR-26b-5p, miR-211-5p, miR-452-3p, miR-363, miR-2284g, miR-378g, miR-16a, miR-502-5p, miR-15a, miR-147-5p, miR-6527, miR-3059-5p, miR-199b-5p, miR-24-3p, miR-211, miR-145a-5p, novel_23, miR-450c-3p, miR-7b-5p, miR-2284aa, miR-497-5p, miR-2284ab, miR-16b, miR-145b, miR-2300a-5p, miR-2459, miR-2285e, miR-134-3p, miR-2284d, miR-2285g, novel_51, miR-16b, miR-2957, miR-505, miR-7-5p, miR-452-5p, miR-199b-5p, miR-2284b, miR-676-3p, miR-424-5p, miR-130b-5p, miR-139-5p, miR-3064-5p, miR-2285u, miR-3596, miR-3082-5p, miR-1185-2-3p, miR-140-5p, miR-199b-5p, miR-129b-5p, miR-9-3p, novel_60, miR-3956-3p, miR-541-3p, miR-181d-5p, miR-361-3p, miR-9-3p, miR-2285n, miR-30b-5p, miR-101-3p, miR-371a-5p, miR-2285y, miR-3968, miR-4726-5p, miR-499a-5p, miR-105-1, novel_78, miR-330-3p, miR-2300a-5p, miR-5010-3p, miR-145b, miR-153, miR-455-3p, miR-1185-3p, miR-2459, miR-329-3p, miR-541, miR-362-3p, miR-16-2-3p, miR-1388-3p, miR-382-3p, miR-106a-5p, miR-424-5p, miR-101b-3p, miR-33a-5p, miR-8485, miR-320b, miR-2957, miR-29b-1-5p, miR-362-3p, miR-16b, miR-106b-5p, miR-1185-5p, miR-3085-3p, miR-199b-5p, miR-153-3p, miR-214-3p, miR-140-5p, miR-548o-3p, miR-21-3p, miR-216b-3p, miR-296-3p, miR-377-3p, miR-376e-3p, miR-192-5p, miR-139-5p, miR-656-3p, miR-15b-5p, miR-299, miR-450a-1-3p, miR-433-3p, miR-30d-5p, miR-30f, miR-345-5p, miR-543-3p, miR-186-5p, novel_99, miR-129-2-3p, miR-145a-3p, miR-214, miR-425-5p, miR-3074-2-3p, miR-224-5p, miR-181c-5p, miR-3604, miR-450b-3p, miR-664a, miR-424-5p, miR-129-5p, miR-669a-3p, miR-3960, miR-106a, miR-3600, miR-485-3p, miR-487a-3p, miR-15a-5p, miR-2284h-5p, miR-30c-5p, miR-215-5p, miR-362-3p, miR-193b-5p, miR-2904, miR-5703, miR-140-3p, miR-1434-5p, miR-4429, miR-218-1-3p, miR-329a-5p, miR-2285w, miR-195a-3p, miR-20a, miR-421-5p, miR-29b-1-5p, miR-376c-3p, miR-2411, miR-143-3p, miR-208b-3p, miR-92a-1-5p, miR-185-3p, miR-106a, miR-202-5p, miR-30d, miR-329-5p, miR-3120-3p, miR-29a-3p, miR-374c-3p, miR-144-3p, miR-216a-3p, miR-3591-3p, miR-195a-5p, miR-1a-1-5p, miR-29c-3p, miR-2285x, miR-323c, novel_27, miR-2284w, miR-199b-5p, miR-15a, miR-208a-3p, miR-142b, miR-20a-5p, miR-16a, novel_1, miR-29a, miR-6123, miR-20b, miR-2113, miR-181a-5p, miR-450c-3p, miR-374b-3p, miR-145a-5p, miR-29b, miR-16b, miR-497-5p, miR-6240, let-7f-2-3p, let-7f-2-3p, miR-654-</p> |
| MTX3 | ENSOARGO(metaxin)   | <p>miR-139-5p, miR-3064-5p, miR-2285u, miR-3596, miR-3082-5p, miR-1185-2-3p, miR-140-5p, miR-199b-5p, miR-129b-5p, miR-9-3p, novel_60, miR-3956-3p, miR-541-3p, miR-181d-5p, miR-361-3p, miR-9-3p, miR-2285n, miR-30b-5p, miR-101-3p, miR-371a-5p, miR-2285y, miR-3968, miR-4726-5p, miR-499a-5p, miR-105-1, novel_78, miR-330-3p, miR-2300a-5p, miR-5010-3p, miR-145b, miR-153, miR-455-3p, miR-1185-3p, miR-2459, miR-329-3p, miR-541, miR-362-3p, miR-16-2-3p, miR-1388-3p, miR-382-3p, miR-106a-5p, miR-424-5p, miR-101b-3p, miR-33a-5p, miR-8485, miR-320b, miR-2957, miR-29b-1-5p, miR-362-3p, miR-16b, miR-106b-5p, miR-1185-5p, miR-3085-3p, miR-199b-5p, miR-153-3p, miR-214-3p, miR-140-5p, miR-548o-3p, miR-21-3p, miR-216b-3p, miR-296-3p, miR-377-3p, miR-376e-3p, miR-192-5p, miR-139-5p, miR-656-3p, miR-15b-5p, miR-299, miR-450a-1-3p, miR-433-3p, miR-30d-5p, miR-30f, miR-345-5p, miR-543-3p, miR-186-5p, novel_99, miR-129-2-3p, miR-145a-3p, miR-214, miR-425-5p, miR-3074-2-3p, miR-224-5p, miR-181c-5p, miR-3604, miR-450b-3p, miR-664a, miR-424-5p, miR-129-5p, miR-669a-3p, miR-3960, miR-106a, miR-3600, miR-485-3p, miR-487a-3p, miR-15a-5p, miR-2284h-5p, miR-30c-5p, miR-215-5p, miR-362-3p, miR-193b-5p, miR-2904, miR-5703, miR-140-3p, miR-1434-5p, miR-4429, miR-218-1-3p, miR-329a-5p, miR-2285w, miR-195a-3p, miR-20a, miR-421-5p, miR-29b-1-5p, miR-376c-3p, miR-2411, miR-143-3p, miR-208b-3p, miR-92a-1-5p, miR-185-3p, miR-106a, miR-202-5p, miR-30d, miR-329-5p, miR-3120-3p, miR-29a-3p, miR-374c-3p, miR-144-3p, miR-216a-3p, miR-3591-3p, miR-195a-5p, miR-1a-1-5p, miR-29c-3p, miR-2285x, miR-323c, novel_27, miR-2284w, miR-199b-5p, miR-15a, miR-208a-3p, miR-142b, miR-20a-5p, miR-16a, novel_1, miR-29a, miR-6123, miR-20b, miR-2113, miR-181a-5p, miR-450c-3p, miR-374b-3p, miR-145a-5p, miR-29b, miR-16b, miR-497-5p, miR-6240, let-7f-2-3p, let-7f-2-3p, miR-654-</p>                                                                                                                                                                                                                                                                                                                                                                                                                                                                                                                                                                                                                                                                                                                                                                                                                                                                                                                                                                                                                                                                              |

miR-3591-5p, miR-345-3p, miR-29d-3p, miR-1343-5p, miR-23b-5p, miR-330-5p, miR-9-5p, miR-322-5p, miR-483-3p, miR-758-5p, miR-214-5p, miR-429-3p, novel\_79, miR-412, miR-2898, miR-450a-2-3p, miR-127-5p, miR-200c-3p, miR-152-3p, novel\_96, miR-200c, miR-30c-2-3p, miR-339a, miR-28b, miR-2478, miR-199a-5p, miR-200a, miR-3065-3p, miR-490-3p, miR-1271-3p, miR-29b-2-5p, miR-30a-3p, miR-3064-5p, miR-4286, miR-181a-2-3p, miR-329a, miR-2318, miR-329b, miR-23a-5p, miR-671-5p, miR-1248, miR-200a-5p, miR-3154, miR-374c-3p, miR-199a-5p, miR-2355-5p, miR-370-3p, miR-204-5p, miR-592, miR-28-5p, miR-34c-3p, miR-29b-3p, miR-2332, miR-370-5p, miR-5100, miR-100-3p, miR-3969, miR-1197-3p, miR-16-5p, miR-30b-3p, miR-29b, miR-16b, miR-4508, miR-497-5p, miR-27b-3p, miR-188-5p, miR-7862, miR-455-5p, miR-873a-5p, miR-653, miR-1285, miR-223-3p, miR-542-3p, miR-197-3p, miR-374b-3p, miR-31-5p, miR-665, miR-339-5p, miR-26b-3p, miR-483-3p, miR-1343-5p, miR-296-3p, miR-2411-3p, novel\_51, miR-455-5p, miR-432-3p, miR-654-3p, miR-432-3p, miR-296-3p, miR-101-5p, miR-1291, miR-412-3p, miR-195a-5p, miR-6516-3p, miR-148a-3p, miR-150-5p, miR-3065-5p, miR-146b-3p, miR-374c-3p, miR-29a-3p, miR-669, miR-3074-5p, miR-378b, miR-3120-3p, miR-29a, miR-421-5p, miR-15a, miR-28c, miR-576-3p, miR-16a, miR-485-3p, novel\_87, miR-211, miR-371b-3p, miR-24-3p, miR-326-3p, novel\_27, miR-199b-5p, novel\_120, miR-335-5p, miR-3957-3p, miR-1193, miR-29c-3p, miR-142-3p, miR-133a-3p, miR-148a-5p, miR-378d, miR-362-3p, miR-2408, miR-2300b-3p, miR-2904, miR-1197-5p, miR-140-3p, miR-5703, miR-340-5p, miR-15a-5p, miR-148b-3p, miR-30d-3p, miR-202-5p, miR-21-3p, miR-196a-3p, novel\_17, miR-210-5p, miR-345-3p, miR-185-3p, miR-92a-1-5p, miR-421-5p, miR-376a-5p, miR-29b-1-5p, miR-2424, miR-345-3p, miR-339b, miR-1827, novel\_99, miR-299, miR-21a-3p, miR-500a-3p, miR-133-3p, miR-361-3p, miR-1271

JUP ENSOARGO( junction

NRP1 ENSOARGO( neuropil

miR-665, miR-320e, miR-338-5p, miR-708-5p, miR-17-3p, miR-3184-3p, miR-6134, miR-181c-5p, miR-122-5p, miR-224-5p, miR-6525, miR-129b-3p, miR-3613-5p, miR-21a-3p, miR-582-5p, miR-543-3p, miR-625-5p, miR-345-5p, miR-133b-3p, miR-532-5p, miR-376e-3p, miR-582-5p, miR-6516, miR-92a-1-5p, miR-26a-5p, miR-30b-3p, miR-3653-3p, miR-345-3p, miR-195a-3p, miR-2285w, miR-216c-5p, miR-143-3p, miR-486-3p, miR-125b-2-3p, miR-376c-3p, miR-664b-3p, miR-29b-1-5p, miR-5703, miR-124-3p, miR-2300b-3p, miR-133a-3p, miR-212-5p, miR-548e-3p, miR-18a-3p, novel\_83, miR-2284h-5p, miR-1973, miR-371a-5p, miR-382-3p, miR-2284q, miR-181d-5p, miR-9-3p, miR-362-5p, miR-378j, miR-9-3p, miR-7977, miR-29b-1-5p, miR-124a, miR-2310, miR-8485, miR-125b-2-3p, miR-3120-5p, miR-2284aa, miR-11-Sep ENSOARGO( septin 1 450b-5p, miR-5010-3p, miR-409b, miR-455-3p, miR-9788-3p, miR-500-5p, miR-539-5p, miR-100-3p, miR-6740-5p, miR-486b-3p, miR-28-5p, miR-133a-3p, miR-193a-5p, miR-28a-3p, miR-145-3p, miR-1197-3p, miR-500b-5p, miR-362-5p, miR-488-3p, miR-671-5p, miR-1814c, miR-345-5p, miR-2318, miR-10b-3p, miR-141-3p, miR-874-3p, miR-376c-3p, miR-223-5p, miR-331-5p, miR-125a-3p, novel\_127, miR-200a-3p, miR-181b-5p, miR-17-3p, miR-3529-3p, miR-2478, miR-2427, miR-3578, miR-214-5p, miR-2284z, miR-758-5p, miR-6516-5p, miR-24-2-5p, miR-302a-5p, miR-382-5p, miR-502-5p, miR-3613, miR-17-3p, miR-495-3p, miR-2285x, miR-2285m, miR-3065-5p, miR-378b, miR-18a-3p, miR-3120-3p, miR-26b-5p, miR-216b-3p, miR-224-5p, miR-452-5p, miR-124-5p, miR-345-5p, miR-503-3p, novel\_23, miR-1434-3p, miR-181a-5p, miR-708-3p, miR-26a-2-3p, miR-26b-3p



miR-2285t, miR-374a-3p, miR-4726-5p, miR-2285n, miR-219a-2-3p, miR-8095, miR-194b-5p, miR-32-3p, miR-3059-5p, miR-129b-5p, miR-541-5p, miR-452-3p, miR-10b, miR-20a-3p, miR-664b, miR-3064-5p, miR-3955-3p, miR-3085-3p, novel\_115, miR-326, miR-4532, miR-33a-5p, miR-376b, let-7c-3p, miR-424-5p, miR-106a-5p, miR-2284aa, miR-143-5p, miR-484, miR-221-3p, miR-9788-3p, novel\_4, miR-105-1, miR-208b-5p, miR-487a-5p, miR-424-5p, miR-17-3p, miR-338-5p, miR-320e, miR-222-3p, miR-6134, miR-425-5p, miR-1271, miR-4510, miR-154b-3p, miR-18a-5p, let-7g-3p, miR-3613-5p, novel\_25, miR-139-5p, miR-6130, miR-3065-3p, miR-32-3p, miR-221-5p, miR-140-5p, miR-545-3p, miR-21-3p, miR-34b-5p, miR-221-5p, miR-466i-5p, miR-760-3p, miR-106a, miR-216a-5p, miR-196a-3p, miR-2432, miR-130a-5p, miR-125b-2-3p, miR-29b-1-5p, miR-20a, miR-19b-3p, miR-188-3p, miR-140-3p, miR-5703, miR-2904, miR-124-3p, miR-2300b-3p, miR-199a-3p, novel\_83, miR-15a-5p, miR-148b-3p, miR-487a-3p, miR-485-3p, miR-3600, miR-199c, miR-382-5p, miR-34c, miR-16a, miR-20a-5p, miR-133a-5p, miR-3613, miR-15a, miR-2428, miR-449a, novel\_27, miR-326-3p, miR-24-3p, miR-17-3p, miR-195a-5p, miR-6395, miR-19a-3p, miR-1291, miR-378b, miR-18b, miR-2387, miR-670-3p, miR-34b, miR-7-1-3p, miR-320b, miR-466f-3p, miR-455-5p, miR-106a-5p, miR-17-5p, miR-330-3p, miR-539-3p, miR-296-3p, miR-455-5p, miR-194-5p, miR-3071-5p, miR-873a-5p, miR-20b, miR-26b-3p, miR-130a-3p, miR-486b-3p, miR-374b-3p, miR-3969, miR-2332, miR-374a-3p, miR-93, miR-671-5p, novel\_48, miR-23a-5p, miR-3074-1-3p, miR-10b-3p, miR-17-5p, miR-18a, miR-3154, miR-2448-3p, miR-488-3p, miR-154b-5p, miR-34c-5p, miR-374c-3p, miR-141-3p, miR-487a-3p, miR-543-5p, miR-17-3p, miR-2285af, miR-1271-3p, miR-376c-5p, miR-3065-3p, miR-376b-5p, miR-380-5p, miR-2478, miR-24-2-5p, miR-3529-3p, miR-105-2, miR-345-3p, miR-545-5p, miR-1271-5p, miR-302a-3p, miR-203-3p, miR-204-3p, miR-7977, miR-4792, miR-329-5p, miR-625-5p, novel\_94, miR-129b-5p, miR-23b, miR-378b, miR-326-3p, miR-338-3p, miR-665-5p, miR-9-5p, miR-433-5p, novel\_120, miR-2447, miR-3964, miR-708-5p, miR-208b-5p, miR-28-5p, miR-486b-3p, miR-107-5p, miR-218-5p, novel\_82, miR-5100, miR-28c, miR-432-5p, miR-9-5p, miR-23b-3p, miR-505-5p, miR-23c, novel\_78, miR-1343-3p, miR-1839-5p, novel\_73, miR-2904, miR-330-5p, miR-432, miR-486-3p, miR-28b, miR-2478, miR-195a-3p, miR-363-5p, miR-23a-3p, miR-345-3p, miR-329a-5p, miR-103a-2-5p, miR-2285o, miR-2898, miR-92a-1-5p, miR-326

miR-125b, miR-320d, miR-2284m, miR-34b-5p, miR-299-3p, miR-183-5p, miR-216c-5p, miR-146a-5p, miR-2432, miR-1246, miR-2904, miR-124-3p, miR-5703, miR-4429, miR-378d, miR-3600, miR-15a-5p, miR-200b, miR-616-3p, miR-655-3p, miR-320e, miR-6516-3p, miR-155-5p, miR-17-3p, miR-424-5p, miR-539-5p, miR-145a-3p, miR-1271, miR-10b-5p, miR-206-3p, let-7b-5p, miR-6134, miR-21a-3p, novel\_99, miR-582-5p, miR-32-3p, miR-3065-3p, miR-21-3p, miR-182-5p, miR-6516, miR-27a-5p, miR-323-5p, miR-139-5p, novel\_25, miR-204-3p, miR-320b, miR-1306-5p, novel\_115, miR-25-5p, let-7e, let-7a-5p, miR-382-3p, miR-2330-5p, miR-424-5p, miR-33a-5p, miR-758-3p, miR-484, miR-10b, miR-30b-3p, miR-125b-2-3p, miR-101a-5p, miR-450b-5p, miR-2284aa, miR-2300a-5p, miR-409b, miR-5010-3p, miR-222-5p, miR-27a-3p, miR-9788-3p, miR-382-3p, miR-2285y, miR-4726-5p, miR-450a-5p, miR-2285t, miR-3059-5p, miR-32-3p, miR-541-3p, miR-212-3p, miR-194b-5p, miR-452-5p, miR-154a, miR-199b-5p, miR-129b-5p, miR-20a-3p, miR-489, miR-3082-5p, let-7d-5p, miR-27a-3p, miR-200c, miR-217, let-7c-5p, miR-339a, miR-17-3p, miR-2898, miR-200c-3p, miR-92a-3p, miR-543-5p, miR-30a-3p, miR-4286, miR-199a-5p, miR-3065-3p, miR-1271-3p, miR-345-3p, miR-134, miR-29d-3p, miR-218-2-3p, let-7d, miR-200b-3p, miR-128-3p, miR-10a-5p, miR-24-2-5p, miR-6516-5p, miR-1271-5p, miR-34c-3p, miR-29b-3p, miR-135a-5p, miR-409-3p, miR-767-5p, miR-410-3p, miR-374b-3p, miR-486b-3p, miR-323-3p, miR-374a-3p, miR-145-3p, miR-488-3p, miR-320a, miR-3154, miR-7144-5p, miR-376c-5p, miR-671-5p, miR-1814c, miR-370-3p, miR-141-3p, miR-374c-3p, miR-34c-5p, miR-324-5p, miR-199a-5p, miR-330-3p, miR-124-5p, miR-452-5p, miR-125a-5p, miR-363-5p, miR-654-3p, miR-345-5p, miR-3071-5p, miR-194-5p, miR-145a-5p, miR-374b-3p, miR-30b-3p, miR-29b, miR-219a-1-3p, miR-133b-5p, miR-26b-3p, let-7c-5p, miR-15a, miR-6529b, miR-34c, miR-16a, let-  
HBEGF ENSOARGO( heparin- 1983, novel\_133, miR-1260a, miR-370-5p, miR-300-3p, miR-9-5p, miR-1260b, miR-370-5p, miR-9-5p, miR-1193  
GNPNAT1 ENSOARGO( glucosam 1983, novel\_133, miR-1260a, miR-370-5p, miR-300-3p, miR-9-5p, miR-1260b, miR-370-5p, miR-9-5p, miR-1193  
STYX ENSOARGO( serine/t miR-409-3p, miR-3120-5p, miR-126a-5p  
miR-32-3p, miR-769, miR-320c, miR-221-3p, miR-545-5p, miR-221, novel\_23, miR-320a, miR-140-3p, miR-4429, miR-335-3p, miR-1814c, miR-1388-3p, miR-32-3p, miR-452-5p, miR-769-5p, miR-2310, miR-320b, miR-769-5p, miR-33a-3p, miR-320d, miR-147-5p  
DPYD ENSOARGO( dihydrop 1814c, miR-1388-3p, miR-32-3p, miR-452-5p, miR-769-5p, miR-2310, miR-320b, miR-769-5p, miR-33a-3p, miR-320d, miR-147-5p  
miR-544-3p, miR-544b, miR-105-1, miR-3064-5p, miR-3064-5p, miR-544a, miR-3085-3p, miR-493-3p, miR-544-5p, miR-105-2, miR-2300b-3p, novel\_17, miR-376a-5p, miR-105-5p  
ITGAE ENSOARGO( integrin 5p, miR-544a, miR-3085-3p, miR-493-3p, miR-544-5p, miR-105-2, miR-2300b-3p, novel\_17, miR-376a-5p, miR-105-5p

miR-27b-3p, miR-369-5p, miR-4508, miR-378c, miR-301b-5p, miR-1843b-5p, miR-432, miR-378b, miR-9788-3p, miR-194-3p, miR-216a-3p, miR-148b-5p, miR-185-5p, miR-134-3p, miR-142-5p, miR-412-5p, miR-432-5p, miR-27a-3p, miR-487b-3p, miR-2285o, miR-193a-3p, miR-214-3p, miR-25-5p, miR-491-5p, miR-3141, miR-2957, miR-296-3p, novel\_103, miR-326, miR-296-3p, miR-2284l, miR-378d, miR-363-5p, let-7c-3p, miR-2330-5p, miR-493-5p, miR-378f, miR-9-3p, miR-493-5p, miR-2285k, miR-96-5p, miR-216a-3p, miR-2387, miR-3141, miR-361-3p, miR-27a-3p, miR-669, novel\_69, miR-378g, miR-3596, miR-378e, miR-320b, miR-154-3p, miR-656-5p, miR-203b-5p, novel\_1, miR-301a-5p, miR-33a-3p, miR-2285y, miR-28c, novel\_82, miR-2285n, miR-2428, miR-326-3p, miR-423-5p, miR-193b-3p, miR-3956-3p, miR-1a-1-5p, miR-3059-5p, novel\_60, miR-148a-5p, miR-128-3p, miR-493-3p, miR-378a-3p, miR-23b-5p, miR-330-5p, miR-2408, miR-378i, novel\_121, miR-378h, miR-1271-5p, miR-2285ad, novel\_96, miR-127-5p, miR-1a-2-5p, miR-185-3p, miR-422a, miR-8117, miR-490-3p, miR-1271-3p, novel\_39, miR-28b, miR-2285i, miR-3529-3p, miR-487a, miR-671-5p, miR-1248, miR-485-5p, miR-23a-5p, miR-7144-5p, miR-329b, miR-154b-3p, miR-488-3p, miR-193b-3p, miR-615-5p, miR-154a-3p, miR-378a-3p, miR-487a-3p, miR-4492, miR-3969, miR-324-3p, miR-369-5p, miR-132-5p, miR-5100, miR-1-5p, miR-2285j, miR-2433, miR-378c, miR-10b-3p, miR-3184-5p, miR-142a-5p, miR-214, miR-1271, miR-378c

FGF19 ENSOARGO(fibroblasts) miR-129-5p, novel\_82

MPLKIP ENSOARGO(M-phase) miR-380-5p, miR-345-5p, miR-2285w, miR-3064-5p, miR-3085-3p, miR-378a-5p, novel\_103, miR-1306-5p, novel\_51, miR-365b-5p, miR-412-5p, miR-2284h-5p, miR-151a-3p, miR-412, miR-1434-3p, miR-615-3p, miR-296-5p, miR-412-3p, miR-365a-5p, miR-4726-5p, miR-615, miR-6402, miR-218-5p, miR-151-3p, miR-6535, novel\_32, miR-3064-5p, miR-7977, miR-2355-5p, miR-345-5p, miR-345-5p, miR-1895, miR-2448-3p, miR-361-3p, miR-1306

TMEM63A ENSOARGO(transmembrane)

miR-2447, miR-541-3p, miR-212-3p, miR-2285f, miR-194b-5p, miR-2285n, miR-382-3p, miR-3968, miR-3958-3p, miR-335, miR-2285t, miR-3064-5p, miR-2285u, miR-3596, miR-1185-2-3p, miR-361-3p, miR-381-3p, miR-96-5p, miR-299b-5p, miR-127-3p, miR-101b-3p, miR-424-5p, miR-106a-5p, miR-23a-3p, miR-652-5p, miR-30c-1-3p, miR-8485, miR-4532, miR-193a, miR-3187-3p, miR-2310, miR-1306-5p, miR-362-3p, miR-505, novel\_19, miR-16b, miR-106b-5p, miR-3085-3p, miR-25-5p, miR-214-3p, miR-105-1, novel\_4, miR-1343-3p, miR-181b-2-3p, miR-496-5p, miR-455-3p, miR-9788-3p, miR-1185-3p, miR-2284r, miR-6529a, miR-329-3p, miR-541, miR-362-3p, miR-299a-5p, miR-2284aa, miR-3120-5p, miR-539-5p, miR-4510, miR-3184-3p, miR-1271, miR-3074-2-3p, miR-214, miR-665-5p, miR-6525, miR-224-5p, miR-6134, miR-2285j, miR-30e-3p, miR-30a-3p, miR-19b-1-5p, miR-664a-5p, miR-874-5p, miR-424-5p, miR-30c-1-3p, miR-548o-3p, miR-21-3p, miR-532-5p, miR-132-5p, miR-6130, miR-22-3p, miR-204-3p, miR-15b-5p, miR-411, let-7g-3p, miR-133b-3p, miR-625-5p, miR-186-5p, miR-20a, miR-195a-3p, miR-181b-1-3p, miR-377-5p, miR-125b-2-3p, miR-486-3p, novel\_17, miR-210-5p, miR-26a-5p, miR-324-3p, miR-106a, miR-106a, miR-1b-3p, miR-30d-3p, miR-23b-3p, miR-15a-5p, miR-23c, miR-2300b-3p, miR-362-3p, miR-1197-5p, miR-140-3p, miR-33b-3p, miR-16-1-3p, miR-133a-3p, let-7a-3p, miR-378d, miR-335-5p, miR-2285x, miR-29c-3p, miR-495-3p, miR-323c, miR-15a, miR-6402, miR-576-3p, miR-142b, miR-20a-5p, miR-16a, miR-29a, novel\_1, miR-379-3p, miR-378b, miR-26b-5p, miR-3120-3p, miR-374c-3p, miR-29a-3p, miR-144-3p, miR-677, miR-6535, miR-669, miR-181b-3p, miR-2285ab, miR-3970, miR-1306, miR-3591-3p, miR-3065-5p, miR-107, miR-195a-5p, miR-628-5p, miR-432-3p, let-7a-2-3p, miR-224-5p, miR-105-5p, miR-194a, novel\_51, miR-106a-5p, miR-17-5p, miR-2285l, miR-452-5p, miR-1243-5p, miR-466f-3p, miR-103a-3p, miR-377-5p, miR-129-5p, miR-874-5p, miR-2397-5p, miR-8117, miR-7-5p, miR-217, novel\_39, miR-216c-5p, miR-2426, miR-450b-5p, miR-2284aa, miR-7b-5p, miR-217-5p, miR-145a-5p, miR-2284z, miR-548w, miR-874-3p, miR-145b, miR-149-5p, novel\_116, miR-1434-3p, miR-194-5p, miR-3071-5p, miR-22-3p, miR-539-3p, miR-194a, miR-197-5p, miR-29b-1-5p, miR-670-3p, miR-2483-3p, miR-6535, miR-668-5p, miR-135b-5p, miR-381-3p, miR-3059-5p, miR-2447, miR-194b-5p, novel\_101, miR-2285x, novel\_1, miR-6119-3p, miR-490-5p, miR-625-3p, miR-28c, miR-6402, novel\_87, miR-485-3p, miR-487a-3p, miR-548e-3p, miR-485-3p, miR-218-1-3p, miR-664-5p, miR-1246, miR-2300b-3p, novel\_133, miR-218-2-3p, miR-28b, miR-29b-1-5p, miR-200a-3p, miR-324-3p, miR-3071-3p, miR-500a-5p, miR-30f, miR-22-3p, miR-204-3p, miR-141-3p, miR-2355-5p, miR-370-3p, miR-1248, miR-1827, miR-488-3p, miR-655, miR-137-3p, miR-323-3p, miR-539-5p, miR-1306-5p, miR-103b, miR-664a, miR-410-5p, miR-655-3p, miR-135a-5p, miR-26c

miR-1271, miR-3120-3p, miR-552-3p, miR-370-3p, miR-21-3p, miR-3064-5p, miR-30c-1-3p, miR-4443, miR-378g, miR-3591-3p, miR-18a-3p, miR-1895, miR-107, miR-214, miR-541-3p, miR-3059-5p, miR-326-3p, miR-361-3p, miR-331-3p, miR-6529b, miR-28c, miR-147-5p, miR-128-1-5p, miR-103a-3p, miR-18a-3p, miR-103, miR-2459, miR-214-5p, miR-149-5p, miR-194-3p, miR-134-3p, miR-330-5p, miR-541, miR-744-5p, miR-4508, miR-3064-5p, miR-1388-3p, novel\_39, miR-432-3p, miR-30c-1-3p, miR-28b, miR-432-3p, miR-654-3p, miR-2285v, miR-324-3p, miR-30c-2-3p, miR-326, miR-196a-3p, miR-214-3p, novel\_127, miR-107, miR-760-3p, miR-3085-3p, novel\_79, miR-30d-3p, miR-302a-5p, miR-23b-3p, miR-148b-3p, miR-134-5p, miR-532-3p, miR-129-1-3p, novel\_121, miR-30c-5p, miR-2300b-3p, miR-134, miR-1290, miR-188-3p, miR-30a-5p, miR-105-2, miR-128-3p, miR-30c, miR-30a-3p, miR-3064-5p, miR-345-3p, miR-421-5p, miR-200a, miR-490-3p, miR-30b, miR-2285af, miR-664-3p, miR-2285p, miR-324-3p, miR-339a, miR-2284m, miR-1a-2-5p, miR-107, miR-30d, miR-152-3p, miR-3965, miR-22-3p, miR-27b-5p, miR-30d-5p, miR-23b, miR-339b, miR-345-5p, miR-345-5p, miR-30f, novel\_48, miR-3074-1-3p, novel\_99, miR-1248, miR-1814c, miR-539-5p, miR-129-2-3p, miR-3074-2-3p, miR-142a-5p, miR-181c-3p, miR-338-3p, miR-6134, miR-1-5p, miR-30e-3p, miR-30a-3p, miR-664a-5p, miR-134-5p, miR-130b-5p, miR-31-5p, miR-187-3p, novel\_78, miR-105-1, miR-103a-3p, miR-1343-3p, miR-339-5p, miR-145b, miR-27a-3p, miR-142-5p, miR-2355-3p, miR-103, miR-223-3p, miR-7b-5p, miR-1434-3p, miR-22-3p, miR-145a-5p, miR-758-3p, miR-21-5p, miR-3432b, miR-3120-5p, miR-27b-3p, miR-130b-5p, miR-23a-3p, miR-654-3p, miR-2310, miR-345-5p, miR-758-3p, miR-7-5p, novel\_103, miR-105-5p, novel\_51, miR-3085-3p, miR-378a-5p, miR-3955-3p, miR-3064-5p, miR-664b, miR-7689-3p, miR-7977, miR-2404, miR-670-3p, miR-3082-5p, miR-27a-3p, miR-148a-3p, miR-21c, miR-216a-3p, miR-181a-3p, miR-107, miR-3059-5p, novel\_120, miR-1a-1-5p, miR-885-5p, miR-335-5p, novel\_82, miR-30b-5p, miR-335, miR-656-5p, miR-421-5p, miR-2285t

D2HGDH

ENSOARGO(D-2-hydr

GABRR3

ENSOARGO( gamma-am

miR-15b-3p, miR-30e-3p, miR-30a-3p, novel\_74, miR-17-3p, miR-190a-5p, miR-424-5p, miR-539-5p, miR-3074-5p, miR-224-5p, miR-543-3p, novel\_99, miR-32-5p, miR-15b-5p, miR-26a-5p, miR-500a-5p, miR-329a-5p, miR-195a-3p, miR-2424, miR-126-3p, miR-2366, miR-124-3p, miR-1197-5p, miR-1193, novel\_73, miR-361-5p, miR-548e-3p, miR-30d-3p, miR-7859, miR-23b-3p, miR-15a-5p, miR-23c, novel\_83, miR-199a-3p, miR-382-3p, miR-101-3p, miR-107-5p, miR-499a-5p, miR-3958-3p, miR-2285t, miR-3059-5p, miR-363-3p, miR-2285f, miR-194b-5p, miR-190b-5p, miR-452-5p, miR-129b-5p, miR-136-5p, miR-9-3p, miR-499b-5p, miR-25, miR-7857-3p, miR-203-3p, miR-27a-3p, miR-199a-3p, miR-505, miR-16b, miR-1185-5p, miR-103a-2-5p, miR-124a, miR-424-5p, miR-101b-3p, miR-494-3p, miR-382-3p, miR-23a-3p, miR-8485, miR-412-3p, miR-101a-5p, miR-101c, miR-2284aa, miR-199b-3p, novel\_78, miR-548w, miR-27a-3p, miR-455-3p, miR-1-5p, miR-5100, miR-100-3p, miR-592, miR-2284v, miR-16-5p, miR-301, miR-137-3p, miR-23b, miR-2318, miR-329b, miR-2285aa, miR-25-3p, miR-133c, miR-2285af, miR-17-3p, miR-92a-3p, miR-2385-3p, miR-30a-3p, miR-92b-3p, miR-23b-5p, miR-582-3p, miR-412, miR-322-5p, miR-302a-5p, miR-2284z, miR-15a, miR-16a, novel\_87, miR-33a-3p, miR-92a-3p, miR-203b-5p, miR-199c, novel\_120, miR-1a-1-5p, miR-17-3p, miR-495-3p, miR-2285ab, miR-2387, miR-195a-5p, miR-329-5p, miR-3074-5p, miR-26b-5p, miR-2404, miR-374c-3p, miR-224-5p, miR-32, miR-190a, miR-194a, miR-466f-3p, miR-2285r, miR-2284l, miR-194-5p, miR-16b, miR-2284ab, miR-497-5p, miR-188-5p, miR-27b-3p, miR-2284d, miR-2285g, miR-411-5p

let-7g-3p, miR-34b-5p, novel\_99, miR-186-5p, miR-433-3p, miR-301a-3p, miR-216b-5p, miR-22-3p, miR-155-5p, miR-877-5p, miR-2331-3p, miR-140-5p, miR-182-5p, miR-552-3p, miR-6516-3p, miR-17-3p, miR-155-5p, miR-190a-5p, miR-4492, miR-454-3p, miR-130b-5p, miR-219b-3p, miR-338-5p, miR-320e, miR-29b-2-5p, miR-665, miR-6525, miR-338-3p, miR-539-5p, miR-145a-3p, miR-3074-5p, miR-2330-3p, miR-493-3p, miR-4429, miR-16-1-3p, let-7a-3p, miR-378d, miR-2408, miR-2904, miR-188-3p, miR-148b-3p, miR-200b, miR-199a-3p, miR-532-3p, miR-18a-3p, miR-320d, miR-202-5p, miR-2484, novel\_17, miR-219b-5p, miR-216a-5p, miR-324-3p, miR-122-3p, miR-92a-1-5p, miR-29b-1-5p, miR-130a-5p, miR-216c-5p, miR-195a-3p, miR-345-3p, miR-136-5p, miR-376a-3p, miR-1983, novel\_94, miR-140-5p, miR-129b-5p, miR-381-3p, miR-378g, miR-3596, miR-144-5p, miR-376d, miR-499b-5p, miR-211-5p, miR-7977, miR-499a-5p, miR-2285t, miR-2284q, miR-371a-5p, miR-107-5p, miR-877-3p, miR-361-3p, miR-219a-2-3p, miR-3059-5p, miR-190b-5p, miR-450b-5p, miR-16-2-3p, miR-101c, miR-4791, miR-376b-3p, miR-216a-3p, miR-2459, miR-330-3p, miR-1343-3p, miR-5010-3p, miR-145b, miR-130b-3p, miR-3955-3p, miR-103a-2-5p, miR-199a-3p, miR-320b, miR-29b-1-5p, miR-182-5p, miR-3187-3p, miR-2310, miR-382-3p, let-7c-3p, miR-345-5p, let-7g-3p, miR-7144-5p, miR-3074-1-3p, miR-23a-5p, miR-1814c, miR-503-3p, miR-331-5p, miR-320a, miR-3154, miR-331-5p, miR-300-3p, miR-324-5p, miR-223-5p, miR-154b-5p, miR-3068-3p, miR-874-3p, miR-1271, miR-331-5p, miR-134-5p, miR-204-5p, miR-592, miR-29b-3p, miR-2332, miR-144, miR-1260b, miR-6128, miR-144-5p, miR-155-5p, miR-200b-3p, miR-134, miR-29d-3p, miR-1343-5p, miR-23b-5p, miR-758-5p, miR-483-3p, miR-134-5p, miR-429-3p, miR-17-3p, miR-200c-3p, novel\_127, miR-152-3p, miR-1260a, miR-376b-3p, miR-2285af, miR-219-3p, miR-200c, miR-29a-5p, miR-2285b, miR-3529-3p, miR-29b-2-5p, miR-

miR-2285r, miR-493-5p, miR-6240, miR-101-5p, miR-363-5p, miR-2483-5p, miR-196b-5p, miR-193a-3p, miR-466f-3p, miR-452-5p, miR-146a, miR-377-3p, miR-503-5p, miR-17-5p, miR-106a-5p, miR-2411-3p, miR-330-3p, miR-503-5p, miR-185-5p, let-7g-5p, miR-20b, miR-103, miR-544b, novel\_116, miR-103a-3p, miR-130a-3p, miR-138, miR-29b, miR-2284x, miR-188-5p, miR-181a-5p, miR-223-3p, miR-2113, novel\_23, miR-301b-3p, novel\_27, miR-342-3p, miR-29c-3p, miR-2285x, miR-495-3p, miR-193b-3p, novel\_1, miR-29a, miR-199c, miR-142b, miR-133a-5p, miR-20a-5p, miR-502-5p, let-7i, miR-411b-3p, novel\_69, miR-670-3p, miR-29a-3p, miR-2404, miR-320c, miR-7-1-3p, miR-107, miR-19a-3p, let-7e-5p, miR-9851-3p, miR-146b-5p, miR-148a-3p, miR-3065-5p, miR-216a-3p, miR-3591-3p, miR-18a-3p, let-7g, miR-181a-2-3p, miR-30a-3p, miR-3064-5p, miR-1a-2-5p, let-7f-5p, miR-181b-5p, miR-2898, miR-152-3p, novel\_127, miR-107, miR-664-3p, miR-6119-5p, miR-217, let-7c-5p, miR-30c-2-3p, miR-2411-5p, miR-24-2-5p, novel\_121, miR-545-5p, let-7d, miR-128-3p, miR-30c, miR-345-3p, miR-196a-5p, miR-30a-5p, miR-29d-3p, miR-93, miR-6128, miR-138-5p, miR-486b-3p, miR-551b-3p, novel\_63, miR-29b-3p, miR-26c, miR-300-3p, miR-376c-3p, miR-574-5p, miR-2285aa, miR-2318, miR-485-5p, miR-671-5p, miR-20b-5p, miR-3074-1-3p, miR-17-5p, miR-320a, miR-93-5p, miR-30c-1-3p, miR-491-3p, miR-1b-5p, miR-8485, miR-101b-3p, miR-106a-5p, let-7a-5p, miR-124a, let-7c-3p, miR-130b-3p, miR-3085-3p, let-7e, miR-146b, miR-153-3p, miR-342, miR-320b, miR-182-5p, miR-106b-5p, miR-323b-3p, miR-505, miR-142-5p, miR-153, miR-126a-5p, miR-9788-3p, miR-199b-3p, miR-548w, miR-330-3p, miR-299a-5p, miR-544a, miR-2426, miR-143-5p, miR-296-5p, miR-125b-2-3p, miR-323b, miR-877-3p, miR-3956-3p, novel\_60, miR-3059-5p, miR-181d-5p, miR-2284q, miR-101-3p, miR-2440, miR-30b-5p, miR-3082-5p, miR-100a-3p, let-7d-3p, miR-615-5p, miR-412, miR-24-3p, miR-4532, miR-149-5p, miR-665, miR-26c, miR-412-3p, miR-1291, miR-1827

GPCPD1 ENSOARGO( glycerop

ATG4B ENSOARGO( autophag



miR-195a-3p, novel\_17, miR-219b-5p, miR-320d, miR-34b-5p, miR-30b-3p, miR-3600, miR-340-5p, miR-200b, miR-148b-3p, miR-7859, miR-362-3p, miR-5703, novel\_73, miR-4429, miR-34a-5p, miR-664-5p, miR-4510, miR-6525, miR-181c-5p, miR-2285j, miR-320e, miR-665, miR-6516-3p, miR-129-5p, miR-454-3p, miR-504-5p, miR-30c-1-3p, miR-139-5p, miR-6130, miR-656-3p, miR-301a-3p, novel\_25, miR-2285c, miR-2312, miR-101b-3p, miR-33a-5p, miR-30c-1-3p, miR-320b, miR-362-3p, miR-130b-3p, miR-3085-3p, miR-199b-5p, miR-105-1, miR-376b-3p, miR-1185-3p, miR-2285e, miR-143-5p, miR-329-3p, miR-125b-2-3p, miR-30b-3p, miR-362-3p, miR-2284aa, miR-16-2-3p, miR-181d-5p, miR-2285f, miR-9-3p, miR-1285-5p, miR-4726-5p, miR-2284q, miR-2319b, miR-3064-5p, miR-4792, miR-139-5p, miR-374b-5p, miR-499b-5p, miR-3082-5p, miR-2483-3p, miR-489, miR-1185-2-3p, miR-376d, miR-203-3p, miR-199b-5p, miR-129b-5p, miR-504, miR-9-3p, miR-376a-3p, miR-493-5p, miR-3064-5p, miR-199a-5p, miR-200c, miR-376b-3p, miR-30c-2-3p, miR-200c-3p, miR-181b-5p, miR-28-3p, miR-152-3p, miR-429-3p, miR-302a-5p, miR-582-3p, miR-545-5p, miR-2284z, miR-29d-3p, miR-200b-3p, miR-105-2, miR-374b, miR-28a-3p, miR-1197-3p, miR-29b-3p, miR-144, miR-767-5p, miR-2285aa, miR-34c-5p, miR-300-3p, miR-199a-5p, miR-320a, miR-329a, miR-767, novel\_48, miR-493-5p, miR-363-5p, miR-2285r, miR-455-5p, miR-105-5p, miR-124-5p, miR-466f-3p, miR-130a-3p, miR-2285g, miR-181a-5p, miR-708-3p, miR-3071-5p, miR-16-1-3p, miR-219a-1-3p, miR-29b, miR-30b-3p, miR-455-5p, novel\_120, miR-29c-3p, miR-301b-3p, miR-199b-5p, miR-2285m, miR-449a, miR-34c, miR-29a, miR-147-5p, miR-29a-3p, miR-34b, miR-320c, miR-144-3p, miR-148a-3p, miR-2285ab, miR-376b-3p, miR-2284e  
 miR-9-5p, miR-2284z, miR-2285ad, miR-19b-3p, miR-411-3p, miR-493-3p, miR-148a-5p, miR-5703, miR-1434-5p, miR-217-5p, miR-148b-5p, miR-28b, miR-2424, miR-200a, miR-329a-5p, miR-3064-5p, miR-29b-2-5p, miR-466i-5p, miR-2898, miR-200a-3p, miR-543-5p, miR-8117, miR-217, miR-377-3p, miR-133c, miR-182-5p, miR-141-3p, miR-216b-3p, miR-133b-3p, miR-7144-5p, miR-411, miR-3184-5p, miR-2284v, miR-133a-3p, miR-1843b-3p, miR-28-5p, miR-204-5p, miR-708-5p, miR-4492, miR-2433, miR-2284k, miR-29b-2-5p, miR-320e, miR-6740-5p, miR-134-3p, miR-1185-3p, miR-9788-3p, miR-216a-3p, miR-148b-5p, miR-16-1-3p, miR-2284ab, miR-30b-3p, miR-2284aa, miR-2113, miR-30b-3p, miR-2284l, miR-3187-3p, let-7f-2-3p, let-7f-2-3p, miR-3085-3p, miR-377-3p, miR-182-5p, miR-2957, miR-378g, miR-1185-2-3p, miR-329-5p, miR-3064-5p, miR-211-5p, miR-3120-3p, miR-19a-3p, miR-544-5p, miR-335-3p, miR-211, miR-2284w, miR-423-5p, novel\_120, miR-9-5p, miR-452-5p, miR-379-3p, miR-28c, miR-133a-5p, miR-218-5p, miR-2285y

ALG13 ENSOARGOC ALG13,

U

SLC25A17 ENSOARGOC solute c

c

miR-221-5p, miR-874-3p, miR-329-5p, miR-34c-5p, miR-34b, miR-378j, miR-18a-3p, miR-7144-5p, novel\_99, miR-3959-3p, miR-449a, miR-1285-5p, miR-34c, miR-301a-5p, miR-665, miR-421-5p, miR-134-5p, miR-18a-3p, miR-429-3p, miR-200b, miR-134-5p, miR-134, miR-301b-5p, miR-124-3p, miR-758-3p, miR-1197-5p, miR-450b-5p, miR-200b-3p, miR-34a-5p, miR-183-5p, miR-329a-5p, miR-124a, miR-345-3p, miR-421-5p, miR-654-3p, miR-8485, miR-758-3p, novel\_103, miR-200c, miR-127-5p, miR-200c-3p, miR-34b-5p, miR-221-5p, novel\_127, miR-2484  
 miR-7b-5p, miR-10b, miR-143-5p, miR-431-3p, miR-412-3p, miR-1260b, miR-16-1-3p, miR-188-5p, miR-185-5p, miR-412-5p, miR-2459, miR-126a-5p, miR-9788-3p, novel\_103, miR-7-5p, miR-342, miR-365b-5p, miR-196b-5p, miR-124a, let-7c-3p, miR-432-3p, miR-8485, miR-409-5p, miR-216a-3p, miR-412-3p, miR-1291, novel\_94, miR-6395, miR-1983, miR-7975, miR-452-3p, miR-139-5p, miR-4792, miR-363, miR-7977, miR-10a-5p, miR-499b-5p, miR-489, miR-3596, miR-499a-3p, miR-6535, miR-6402, novel\_82, miR-769-5p, miR-2285t, miR-203b-5p, miR-2447, miR-342-3p, miR-371b-3p, miR-361-3p, miR-2366, miR-196a-5p, novel\_133, miR-188-3p, miR-23b-5p, miR-124-3p, miR-218-2-3p, miR-582-3p, miR-10a-5p, miR-128-3p, miR-16-1-3p, miR-6517, miR-412, miR-505-5p, novel\_121, miR-328-3p, miR-618, novel\_17, miR-205-5p, miR-1260a, miR-219b-5p, miR-127-5p, miR-216c-5p, miR-345-3p, miR-433-3p, miR-876-3p, miR-23a-5p, miR-574-5p, miR-552-3p, miR-370-3p, miR-139-5p, miR-769, miR-10a, miR-499b-3p, novel\_32, miR-223-5p, miR-204-3p, novel\_63, miR-320e, miR-6740-5p, miR-874-5p, miR-145a-3p, miR-3074-2-3p, miR-1197-3p, miR-1260b, miR-10b-5p, miR-769-5p, miR-365a-5p

ITGB1

ENSOARGO( integrin

CCDC63

ENSOARGO( coiled-c

miR-412-3p, miR-30b-3p, miR-16-2-3p, miR-181b-2-3p, miR-145b, miR-330-3p, novel\_78, miR-9788-3p, miR-455-3p, miR-421, miR-1185-3p, miR-142-3p, miR-147a, miR-1298-3p, miR-505, miR-29b-1-5p, miR-23a-3p, miR-376b, miR-2310, miR-491-3p, miR-30c-1-3p, miR-129b-5p, miR-378j, miR-335-3p, novel\_94, miR-1983, miR-499b-5p, miR-211-5p, miR-10b, miR-203-3p, miR-1185-2-3p, miR-2483-3p, miR-218-5p, miR-374a-3p, miR-2284q, miR-628-3p, miR-3059-5p, novel\_60, miR-3956-3p, miR-363-3p, miR-877-3p, novel\_133, miR-193b-5p, miR-664-5p, miR-16-1-3p, miR-361-5p, miR-493-3p, miR-3600, miR-532-3p, miR-328-3p, miR-7859, miR-23b-3p, miR-383-5p, miR-23c, miR-125b, miR-345-3p, miR-1277-5p, miR-299-3p, miR-2284m, miR-195a-3p, miR-369-3p, miR-345-3p, miR-183-5p, miR-329a-5p, miR-2411, miR-2424, miR-486-3p, miR-380-3p, miR-29b-1-5p, miR-377-5p, miR-142a-3p, miR-655, miR-450a-1-3p, miR-543-3p, miR-

TXNDC16 ENSOARGO(thioredo.1827, novel\_99, miR-582-5p, let-7g-3p, miR-216b-3p, miR-296-3p, miR-32-5p, miR-30c-1-3p, miR-548o-3p, novel\_25, miR-27a-5p, miR-6516, miR-582-5p, miR-323-5p, miR-655-3p, miR-664a-5p, miR-665, miR-708-5p, miR-487a-5p, miR-129-5p, miR-208b-5p, miR-4492, miR-130b-5p, miR-450b-3p, miR-6516-3p, miR-664a, miR-145a-3p, miR-3074-5p, miR-338-3p, miR-450c-3p, miR-145a-5p, miR-542-3p, miR-223-3p, miR-2113, miR-1434-3p, miR-26a-2-3p, miR-188-5p, miR-2284x, miR-2284ab, miR-138, miR-30b-3p, miR-380-3p, miR-16-1-3p, miR-26b-3p, miR-377-5p, miR-149-5p, miR-412-5p, miR-185-5p, miR-330-3p, miR-32, novel\_51, miR-2411-3p, miR-1343-5p, miR-125a-5p, miR-378a-5p, miR-668-3p, let-7f-2-3p, let-7f-2-3p, miR-130b-5p, miR-6240, let-7a-2-3p, miR-432-3p, miR-654-3p, miR-3970, miR-150-5p, miR-21c, miR-378b, miR-2387, miR-2319a, miR-135b-5p, miR-6395, miR-412-3p, miR-3120-3p, novel\_68, miR-329-5p, miR-3074-5p, miR-216b-3p, miR-677, miR-181b-3p, miR-2404, miR-323a-5p, novel\_69, miR-2284d, miR-185-5p, miR-148b-5p, miR-20b, miR-1185-3p, miR-3955-5p, miR-487b-3p, miR-145b, miR-181b-2-3p, miR-16-1-3p, miR-2284aa, miR-188-5p, miR-2284x, miR-1434-3p, miR-145a-5p, miR-432-3p, miR-2285r, miR-539-3p, miR-8485, let-7a-2-3p, miR-493-5p, miR-106a-5p, miR-101b-3p, miR-363-5p, let-7c-3p, miR-2284b, miR-660, miR-377-3p, miR-17-5p, miR-106b-5p, miR-106a-5p, miR-2404, miR-3596, miR-3082-5p, miR-677, miR-203-3p, miR-144-3p, miR-181b-3p, miR-1185-2-3p, miR-139-5p, miR-3074-5p, miR-216b-3p, miR-3120-3p, miR-211-5p, miR-96-5p, miR-136-5p, miR-493-5p, miR-135b-5p, miR-2285ab, miR-150-5p, miR-211, miR-2284w, miR-2285f, miR-142b, miR-20a-5p, miR-

CCNG2 ENSOARGO(cyclin G.769-5p, miR-487a-3p, miR-1271-5p, miR-340-5p, miR-134-5p, miR-2284z, miR-486-5p, novel\_121, miR-106a, miR-582-3p, miR-300, miR-16-1-3p, miR-148a-5p, miR-1246, miR-134, miR-148b-5p, miR-181b-1-3p, miR-2284y, miR-3065-3p, miR-192-3p, miR-2284a, miR-369-3p, miR-20a, miR-195a-3p, miR-106a, miR-2285af, miR-374a-5p, miR-216a-5p, miR-30f, miR-582-5p, miR-331-5p, miR-377-3p, miR-139-5p, miR-6130, miR-769, miR-548o-3p, miR-660-5p, miR-216b-3p, miR-3065-3p, miR-370-3p, miR-2312, let-7g-3p, miR-20b-5p, miR-582-5p, miR-381-3p, let-7f-1-3p, miR-503-3p, miR-93-5p, miR-137-3p, miR-655, miR-17-5p, miR-769-5p, miR-3074-5p, miR-4510, miR-2284v, miR-1271, miR-134-5p, miR-204-5p, miR-2284k, miR-144, miR-655-3p, miR-135a-5p

|        |                    |                                                                                                                                                                                                                                                                                                                                                                                                                                                                                                                                                                                                                                                                                                                                                                                                                                                                                                                                                                                                                                                                                                                                                    |
|--------|--------------------|----------------------------------------------------------------------------------------------------------------------------------------------------------------------------------------------------------------------------------------------------------------------------------------------------------------------------------------------------------------------------------------------------------------------------------------------------------------------------------------------------------------------------------------------------------------------------------------------------------------------------------------------------------------------------------------------------------------------------------------------------------------------------------------------------------------------------------------------------------------------------------------------------------------------------------------------------------------------------------------------------------------------------------------------------------------------------------------------------------------------------------------------------|
| CLDND1 | ENSOARGO(Claudin   | miR-3607-3p, miR-3064-5p, miR-2483-5p, miR-2285x, miR-378c, miR-378c, miR-378d, miR-323-3p, miR-422a, miR-660, miR-3085-3p, miR-145b, miR-378a-3p, miR-3064-5p, miR-660-5p, miR-6535, miR-378e, miR-582-5p, miR-378h, miR-670-3p, miR-145a-5p, miR-378a-3p, miR-378b, miR-378i, miR-2113, miR-378f, miR-582-5p, miR-3120-5p, miR-378c, miR-329b<br>miR-19b-3p, miR-2284ab, miR-2284u, miR-21b, miR-429-3p, miR-222-5p, miR-2284d, novel_116, miR-219-3p, miR-125a-3p, miR-2284m, miR-452-5p, miR-2284b, miR-450b-5p, miR-2284y, miR-                                                                                                                                                                                                                                                                                                                                                                                                                                                                                                                                                                                                               |
| CAST   | ENSOARGO(Calpasta  | 3065-5p, miR-150-5p, miR-19a-3p, miR-545-3p, miR-2284g, miR-211-5p, miR-552-3p, miR-7-1-3p, miR-370-3p, miR-7857-3p, miR-2284n, miR-2284k, miR-219b-3p, novel_9, miR-204-5p, miR-22-5p, miR-2284v, miR-211, miR-219a-2-3p<br>miR-2440, miR-61b, miR-423-5p, miR-877-3p, miR-361-3p, miR-378j, miR-378g, miR-378e, miR-3064-5p, miR-7977, miR-3085-3p, miR-491-5p, novel_115, miR-326, novel_103, miR-320b, miR-378d, miR-4532, miR-3187-3p, miR-2330-5p, miR-378c, miR-3120-5p, miR-2284aa, miR-378b, miR-2284r, miR-484, miR-147a, miR-421, miR-2285e, miR-216a-3p, miR-455-3p, miR-330-3p, novel_78, novel_4, miR-1343-3p, miR-222-5p, miR-17-3p, miR-664a, miR-450b-3p, miR-874-5p, miR-4492, miR-2285j, miR-6134, miR-3184-5p, miR-145a-3p, miR-4510, miR-378c, miR-3958-5p, miR-339b, miR-885-3p, miR-1895, miR-625-5p, miR-2285c, miR-450a-1-3p, miR-21a-3p, miR-6130, miR-193b-3p, miR-2284s, miR-151b, miR-22-3p, miR-221-5p, miR-378a-3p, miR-296-3p, miR-760-3p, miR-320d, miR-299-3p, miR-21-3p, miR-34b-5p, miR-221-5p, novel_17, miR-92a-1-5p, miR-422a, miR-185-3p, miR-324-3p, miR-486-3p, miR-2411, miR-33b-3p, miR-4429, miR-34a- |
| TRAF7  | ENSOARGO(CTNF rece | 5p, miR-378d, miR-133a-3p, miR-2300b-3p, miR-378i, miR-140-3p, miR-378a-3p, miR-328-3p, miR-151-5p, miR-1247-5p, miR-505-3p, miR-128-1-5p, miR-6123, miR-22-5p, miR-34c, miR-326-3p, miR-449a, miR-17-3p, miR-193b-3p, miR-107, miR-410-5p, miR-1291, miR-6395, miR-505-3p, miR-378f, miR-299b-3p, novel_69, miR-34b, miR-146b-3p, miR-669, miR-320c, miR-6535, miR-378b, miR-320b, miR-193a-3p, miR-455-5p, novel_51, miR-330-3p, let-7a-2-3p, miR-6240, miR-363-5p, miR-455-5p, miR-1843b-5p, miR-542-3p, miR-22-3p, miR-450c-3p, miR-134-3p, miR-2285g, miR-103, miR-194-3p, miR-133b-5p, miR-103a-3p, miR-340-3p, miR-665, miR-339-5p, miR-486b-3p, miR-592, miR-331-3p, miR-378c, let-7g-3p, miR-1248, miR-671-5p, miR-485-5p, miR-320a, miR-34c-5p, miR-503-3p, miR-615-5p, miR-3956, miR-2355-5p, miR-2898, miR-17-3p, novel_96, miR-107, miR-2285af, miR-339a, miR-1271-3p, miR-4286, miR-3064-5p, miR-885-3p, let-7a-2-3p, miR-615-3p, miR-330-5p, miR-                                                                                                                                                                                   |
| ICA1L  | ENSOARGO(Cislet ce | miR-2284l, miR-450b-5p, miR-7859, miR-582-3p, miR-200a, miR-548o-3p, miR-181a-2-3p, miR-2285aa, miR-210-5p                                                                                                                                                                                                                                                                                                                                                                                                                                                                                                                                                                                                                                                                                                                                                                                                                                                                                                                                                                                                                                         |

miR-1343-3p, miR-2300a-5p, miR-409b, miR-27a-3p, miR-145b, miR-1298-3p, miR-2459, miR-9788-3p, miR-455-3p, miR-2284r, miR-296-5p, miR-6529a, miR-30b-3p, miR-544a, miR-1388-5p, miR-1839-3p, miR-2330-5p, miR-1388-3p, miR-652-5p, miR-23a-3p, miR-30c-1-3p, miR-326, miR-29b-1-5p, miR-3085-3p, miR-103a-2-5p, miR-3064-5p, miR-211-5p, miR-499b-5p, miR-378g, miR-27a-3p, miR-4443, miR-203-3p, miR-361-3p, miR-877-3p, miR-3059-5p, miR-2447, miR-194b-5p, miR-1296-5p, miR-877-3p, miR-107-5p, miR-769-5p, miR-18a-3p, miR-3600, miR-23c, miR-23b-3p, miR-328-3p, miR-532-3p, miR-1197-5p, miR-2904, miR-142-3p, miR-493-3p, miR-378d, miR-105-3p, miR-29b-1-5p, miR-196a-3p, miR-92a-1-5p, miR-125b, miR-185-3p, miR-324-3p, miR-221-5p, miR-30b-3p, miR-221-5p, miR-30c-1-3p, miR-27a-5p, miR-544-3p, miR-204-3p, miR-21a-3p, miR-339b, miR-3958-5p, miR-6525, miR-769-5p, miR-6134, miR-29b-2-5p, miR-324-3p, miR-664a, novel\_74, miR-4492, miR-340-3p, miR-339-5p, miR-134-3p, miR-432-5p, miR-2113, miR-1843b-5p, miR-432, miR-145a-5p, miR-194-5p, miR-30b-3p, miR-27b-3p, miR-363-5p, miR-194a, miR-197-5p, miR-125a-5p, miR-378b, novel\_68, miR-3120-3p, novel\_69, miR-669, miR-18a-3p, miR-3970, miR-410-5p, miR-1291, miR-6395, miR-9851-3p, novel\_101, miR-1839-3p, miR-211, miR-2428, miR-326-3p, miR-142b, miR-576-3p, miR-502-5p, novel\_79, miR-1224-5p, miR-486-5p, miR-330-5p, miR-218-2-3p, miR-4286, miR-29b-2-5p, miR-3064-5p, miR-148b-5p, miR-1271-3p, miR-490-3p, novel\_39, miR-339a, miR-30c-2-3p, miR-450a-2-3p, novel\_127, miR-874-3p, miR-615-5p, miR-125a, miR-769, miR-331-5p, miR-154b-5p, miR-3154, miR-23b, miR-329b, miR-10b-3p, miR-671-5p, miR-485-5p, miR-1197-3p, miR-5100, miR-331-3p, miR-125b-5p, miR-6740-5p, miR-204-5p

miR-2285f, miR-9-5p, miR-194b-5p, miR-452-5p, miR-2447, miR-4454, miR-423-5p, miR-1285-5p, miR-219a-2-3p, novel\_82, miR-30b-5p, miR-218-5p, miR-2285n, miR-374a-3p, miR-4726-5p, miR-628-3p, miR-450a-5p, miR-2285u, miR-374b-5p, miR-664b, miR-2319b, miR-203-3p, let-7d-5p, miR-1185-2-3p, miR-376d, miR-7857-3p, miR-493-5p, miR-376a-3p, miR-181a-3p, miR-23a-3p, let-7c-3p, miR-124a, let-7a-5p, miR-106a-5p, miR-494-3p, miR-101b-3p, miR-1b-5p, miR-323b-3p, miR-106b-5p, let-7e, miR-130b-3p, miR-487b-5p, miR-105-1, miR-421, miR-1185-3p, miR-2285e, miR-539-5p, miR-376b-3p, miR-323b, miR-125b-2-3p, miR-21b, miR-2284aa, miR-544a, miR-3074-2-3p, let-7b, miR-433-5p, let-7b-5p, miR-3184-5p, miR-181c-5p, miR-6525, miR-224-5p, miR-219b-3p, let-7f, miR-2285j, miR-454-3p, miR-874-5p, miR-450b-3p, miR-487b-5p, miR-155-5p, miR-21-3p, miR-660-5p, miR-204-3p, miR-155-5p, let-7i-5p, miR-301a-3p, miR-544-TOR1AIP2 ENSOARGO(torsin A 3p, miR-30d-5p, miR-487b-5p, miR-21a-3p, miR-2285c, miR-450a-1-3p, let-7g-3p, miR-2312, miR-345-5p, miR-30f, miR-20a, miR-2285w, miR-376a-5p, miR-664b-3p, miR-125b-2-3p, miR-216a-5p, miR-30b, miR-30d, let-7k, miR-106a, miR-98-5p, miR-3600, miR-548e-3p, miR-106a, miR-532-3p, miR-2284h-5p, miR-616-3p, miR-328-3p, miR-23b-3p, miR-7859, miR-200b, miR-222-5p, miR-23c, miR-124-3p, miR-140-3p, miR-188-3p, miR-1193, miR-30c-5p, miR-2366, miR-1961, miR-376a-5p, miR-361-5p, miR-493-3p, miR-19b-3p, novel\_87, let-7i, miR-20a-5p, miR-6402, miR-147-5p, miR-6123, miR-6119-3p, novel\_68, miR-329-5p, miR-670-3p, miR-376b-3p, miR-3591-3p, miR-216a-3p, miR-378b, miR-2285ab, miR-9851-3p, miR-6516-3p, miR-6395, let-7e-5p, miR-450b-3p, miR-19a-3p, let-7f-2-3p, let-7f-2-3p, miR-493-5p, miR-345-5p, miR-654-3p, miR-105-5p, miR-194a, miR-17-5p, miR-106a-5p, miR-224-5p, miR-660, miR-130a-3p, miR-665, miR-26b-3p, miR-149-5p, miR-411-5p, miR-544b, miR-

miR-1343-3p, miR-216a-3p, miR-9788-3p, miR-484, miR-296-5p, miR-2284r, miR-541, miR-30b-3p, miR-3120-5p, miR-2330-5p, miR-30c-1-3p, miR-4532, novel\_115, miR-326, miR-5126, miR-1306-5p, miR-3085-3p, miR-491-5p, novel\_124, miR-25-5p, miR-3064-5p, miR-452-3p, miR-7857-3p, miR-499a-3p, miR-4443, novel\_60, miR-541-3p, miR-3956-3p, miR-361-3p, miR-423-5p, miR-2440, miR-1973, miR-4726-5p, miR-3960, miR-18a-3p, miR-212-5p, miR-151-5p, miR-532-3p, miR-1247-5p, novel\_83, novel\_133, miR-5703, miR-188-3p, miR-378d, miR-329a-5p, miR-503-5p, miR-486-3p, miR-345-3p, miR-92a-1-5p, miR-185-3p, miR-760-3p, miR-466i-5p, miR-21-3p, miR-30c-1-3p, miR-296-3p, miR-499b-3p, novel\_32, miR-151b, miR-339b, miR-885-3p, miR-625-5p, miR-1895, miR-3184-5p, miR-6134, miR-665, miR-664a, miR-4492, miR-708-5p, miR-340-3p, miR-339-5p, miR-26b-3p, miR-503-5p, miR-194-3p, miR-30b-3p, miR-138, miR-1260b, miR-4508, miR-744-5p, miR-380-5p, miR-363-5p, miR-628-5p, miR-503-5p, miR-3141, miR-2411-3p, novel\_51, miR-1343-5p, novel\_68, miR-329-5p, miR-146b-3p, miR-669, miR-3141, miR-1306, miR-18a-3p, miR-1291, miR-9851-3p, miR-24-3p, miR-1307-3p, miR-326-3p, miR-502-5p, miR-576-3p, miR-6529b, novel\_79, miR-345-3p, miR-1343-5p, miR-23b-5p, miR-330-5p, miR-885-3p, miR-3064-5p, miR-380-5p, novel\_39, miR-1271-3p, miR-1260a, miR-8117, miR-30c-2-3p, miR-339a, miR-2898, novel\_127, novel\_96, miR-370-3p, miR-1271, miR-2448-3p, miR-2474, miR-876-3p, miR-23a-5p, miR-1306-5p, miR-1260b, miR-2433, miR-410-5p, miR-331-3p, miR-138-5p, miR-486b-3p, miR-28-5p

FARP2 ENSOARGO( FERM, Rh) 665, miR-664a, miR-4492, miR-708-5p, miR-340-3p, miR-339-5p, miR-26b-3p, miR-503-5p, miR-194-3p, miR-30b-3p, miR-138, miR-1260b, miR-4508, miR-744-5p, miR-380-5p, miR-363-5p, miR-628-5p, miR-503-5p, miR-3141, miR-2411-3p, novel\_51, miR-1343-5p, novel\_68, miR-329-5p, miR-146b-3p, miR-669, miR-3141, miR-1306, miR-18a-3p, miR-1291, miR-9851-3p, miR-24-3p, miR-1307-3p, miR-326-3p, miR-502-5p, miR-576-3p, miR-6529b, novel\_79, miR-345-3p, miR-1343-5p, miR-23b-5p, miR-330-5p, miR-885-3p, miR-3064-5p, miR-380-5p, novel\_39, miR-1271-3p, miR-1260a, miR-8117, miR-30c-2-3p, miR-339a, miR-2898, novel\_127, novel\_96, miR-370-3p, miR-1271, miR-2448-3p, miR-2474, miR-876-3p, miR-23a-5p, miR-1306-5p, miR-1260b, miR-2433, miR-410-5p, miR-331-3p, miR-138-5p, miR-486b-3p, miR-28-5p

CAPN6 ENSOARGO( calpain ) 135a-1-3p, miR-154a, let-7j, miR-361-5p, miR-339b, miR-1388-5p, miR-1306, miR-1843b-5p, miR-2459, novel\_79, miR-339-5p

miR-7144-5p, miR-671-5p, miR-485-5p, novel\_91, miR-3154, miR-18a, miR-17-5p, miR-199a-5p, miR-374c-3p, miR-3965, miR-215-5p, miR-26c, miR-135a-5p, miR-410-5p, miR-2332, miR-370-5p, miR-93, miR-133a-3p, miR-200b-3p, miR-128-3p, miR-10a-5p, let-7d, miR-582-3p, miR-134, miR-3578, miR-214-5p, miR-2411-5p, miR-483-3p, miR-376a-5p, miR-17-3p, miR-450a-2-3p, miR-200c-3p, miR-30c-2-3p, let-7c-5p, miR-339a, miR-2285af, miR-1260a, miR-200c, miR-199a-5p, miR-2478, miR-29b-2-5p, miR-30a-3p, miR-4286, miR-181a-2-3p, miR-135b-5p, miR-6395, miR-195a-5p, miR-376a-2-5p, miR-450b-3p, miR-18a-3p, miR-18b, miR-146b-3p, miR-2404, miR-670-3p, miR-320b, miR-655-5p, miR-10a-5p, miR-22-5p, miR-199c, novel\_1, miR-16a, let-7i, miR-15a, miR-20a-5p, miR-6529b, novel\_27, miR-3957-3p, miR-542-5p, miR-17-3p, miR-495-3p, miR-1193, miR-135a-2-3p, miR-30b-3p, miR-1260b, miR-374b-3p, miR-873a-5p, miR-20b, miR-2355-3p, miR-432-5p, miR-2285g, let-7g-5p, miR-665, miR-26b-3p, miR-187-3p, miR-125a-5p, miR-452-5p, miR-1343-5p, miR-466f-3p, miR-190a, miR-106a-5p, miR-17-5p, miR-345-5p, miR-582-5p, novel\_99, miR-133b-3p, let-7g-3p, miR-18a-5p, miR-27b-5p, miR-21a-3p, miR-22-3p, novel\_32, miR-155-5p, miR-139-5p, miR-370-5p, miR-424-5p, miR-450b-3p, miR-17-3p, miR-155-5p, miR-324-3p, miR-655-3p, miR-29b-2-5p, miR-320e, let-7b-5p, miR-10b-5p, miR-3074-2-3p, miR-539-5p, miR-2904, miR-1193, miR-1197-5p, miR-5703, novel\_133, miR-215-5p, miR-362-3p, miR-1246, miR-532-3p, miR-222-5p, miR-200b, miR-15a-5p, miR-1b-3p, miR-30b-3p, miR-21-3p, miR-106a, miR-2284m, miR-466i-5p, miR-760-3p, miR-185-3p, miR-125b, miR-542-5p, miR-146a-5p, miR-2411, miR-2432, miR-130a-5p, miR-20a, miR-877-3p, novel\_94, miR-361-3p, miR-199b-5p, let-7d-5p, miR-27a-3p, miR-7857-3p, miR-3082-5p, miR-664b, miR-10b, miR-450a-5p, miR-371a-5p, miR-107-5p, miR-2285n, miR-541-3p, miR-



miR-618, miR-30b, miR-125b, miR-422a, miR-216a-5p, miR-2284m, miR-320d, miR-30d, miR-369-3p, miR-376c-3p, miR-376a-5p, miR-29b-1-5p, miR-421-5p, miR-2432, miR-376a-5p, miR-30c-5p, miR-378i, miR-1434-5p, miR-378a-3p, miR-4429, miR-2284u, miR-148a-5p, miR-16-1-3p, miR-30d-3p, miR-3600, miR-23c, miR-23b-3p, miR-30e-3p, miR-2285j, miR-338-5p, miR-324-3p, miR-30a-3p, miR-487b-5p, novel\_74, miR-145a-3p, miR-3074-5p, miR-539-5p, miR-378c, miR-224-5p, miR-3184-5p, miR-2285c, miR-21a-3p, miR-487b-5p, miR-30d-5p, miR-2312, miR-186-5p, miR-582-5p, miR-543-3p, miR-660-5p, miR-32-3p, miR-378a-3p, miR-552-3p, miR-216b-3p, miR-21-3p, miR-544-3p, miR-377-3p, miR-376e-3p, miR-582-5p, miR-320b, miR-342, miR-29b-1-5p, miR-487b-5p, miR-103a-2-5p, miR-199b-5p, miR-1388-3p, miR-2284b, miR-23a-3p, miR-378d, miR-6529a, miR-2284r, miR-378b, miR-125b-2-3p, miR-101a-5p, miR-544a, miR-1388-5p, miR-378c, miR-105-1, miR-27a-3p, miR-376b-3p, miR-539-5p, miR-147a, miR-2285e, miR-148b-5p, miR-30b-5p, miR-2285n, miR-107-5p, miR-2285y, miR-499a-5p, miR-628-3p, miR-2284q, miR-2285t, miR-32-3p, miR-2285f, miR-361-3p, miR-7705, miR-423-5p, miR-199b-5p, miR-140-5p, miR-381-3p, miR-1983, miR-493-5p, miR-376a-3p, miR-20a-3p, miR-2285u, miR-489, miR-378e, miR-7857-3p, miR-3596, miR-27a-3p, miR-376d, miR-144-5p, miR-125a-3p, miR-200c, miR-2285af, miR-376b-3p, miR-3071-3p, miR-30f, miR-6536, miR-127-5p, miR-200c-3p, miR-200a-3p, miR-543-5p, miR-30a-3p, miR-450b-5p, miR-2284a, miR-192-3p, miR-200a, miR-2284y, miR-199a-5p, miR-196a-5p, miR-30a-5p, miR-300, miR-30c, miR-105-2, miR-429-3p, miR-2285ad, miR-376a-5p, miR-1224-5p, miR-378h, miR-505-5p, miR-135a-1-3p, miR-494-5p, miR-100-3p, miR-125b-5p, novel\_9, miR-144-5p, miR-323-3p, miR-378c, miR-145-3p, miR-488-3p, miR-30e-5p, miR-381-3p, miR-320a, miR-23b, miR-200a-5p, miR-190a-3p, miR-7144, miR-1248, miR-20b-5p, miR-331-5p, miR-301, miR-21a-3p, miR-299, miR-17-5p, miR-137-3p, miR-93-5p, miR-6516, miR-192-5p, let-7i-5p, miR-133c, miR-324-5p, miR-215-5p, miR-21-3p, miR-331-5p, miR-487b-5p, miR-134-5p, miR-208b-5p, miR-2332, miR-15b-3p, let-7f, miR-135a-5p, miR-324-3p, miR-1260b, miR-224-5p, miR-93, miR-181c-5p, miR-338-3p, let-7b-5p, let-7b, miR-6128, let-7d, novel\_73, miR-411-3p, miR-361-5p, miR-200b-3p, miR-134, miR-215-5p, miR-1961, miR-23b-5p, miR-6516-5p, miR-200b, miR-24-2-5p, miR-9-5p, miR-134-5p, miR-106a, miR-376a-5p, miR-3600, miR-412, miR-200c-3p, let-7f-5p, miR-181b-5p, miR-98-5p, miR-106a, let-7k, miR-2484, miR-210-5p, miR-200c, miR-1260a, let-7c-5p, miR-324-3p, miR-24-2-5p, miR-29b-1-5p, let-7g, miR-181a-2-3p, miR-20a, miR-135b-5p, miR-376a-2-5p, let-7e-5p, miR-335-3p, miR-493-5p, miR-3591-3p, miR-150-5p, miR-3082-5p, miR-146b-3p, let-7d-5p, miR-24-1-5p, miR-576-3p, miR-20a-5p, let-7i, miR-301a-5p, miR-107-5p, miR-3959-3p, miR-877-3p, miR-3956-3p, miR-219b-3p, novel\_60, miR-181d-5p, miR-9-5p, miR-299a-5p, miR-1260b, miR-1839-5p, miR-301b-5p, miR-181a-5p, miR-197-3p, miR-412-3p, let-7g-5p, miR-20b, miR-149-5p, miR-103a-2-5p, let-7e, miR-224-5p, miR-106b-5p, miR-106a-5p, miR-17-5p, miR-29b-1-5p, miR-493-5p, miR-106a-5p, let-7a-5p, miR-101-5p

|        |                   |                                                                                                                                                                                                                                                                                                                                                                                                                                                                                                                                                                                                                                                                                                                                                                                                                                      |
|--------|-------------------|--------------------------------------------------------------------------------------------------------------------------------------------------------------------------------------------------------------------------------------------------------------------------------------------------------------------------------------------------------------------------------------------------------------------------------------------------------------------------------------------------------------------------------------------------------------------------------------------------------------------------------------------------------------------------------------------------------------------------------------------------------------------------------------------------------------------------------------|
| CNOT6L | ENSOARGO(CCR4-NOT | miR-670-3p, miR-27a-3p, miR-3074-5p, miR-3120-3p, miR-147-3p, miR-19a-3p, miR-668-5p, miR-1285-5p, novel_120, miR-1a-1-5p, miR-9-5p, miR-628-3p, miR-2284q, miR-147-5p, miR-2285g, miR-539-5p, miR-185-5p, miR-455-3p, miR-2285e, miR-27a-3p, miR-21b, miR-16-2-3p, miR-27b-3p, miR-181a-5p, miR-3962, miR-432-3p, miR-432-3p, miR-3187-3p, miR-1b-5p, miR-345-5p, let-7a-2-3p, miR-363-5p, let-7c-3p, miR-628-5p, miR-483-3p, miR-1343-5p, miR-133c, miR-2285aa, let-7g-3p, miR-345-5p, miR-345-5p, let-7g-3p, miR-543-3p, miR-488-3p, miR-21a-3p, miR-2285c, miR-301, miR-181c-5p, miR-590-3p, miR-3074-5p, miR-1-5p, miR-505-5p, miR-9-5p, miR-24-2-5p, miR-483-3p, miR-758-5p, miR-200b, miR-548e-3p, miR-429-3p, miR-19b-3p, miR-200b-3p, let-7a-2-3p, miR-1343-5p, miR-1a-2-5p, miR-181b-5p, miR-200c-3p, miR-2285af, miR-200c |
| MYL2   | ENSOARGO(myosin,  | miR-1285<br>miR-185-5p, miR-3431, miR-149-5p, miR-2355-3p, miR-126a-5p, miR-544b, novel_78, miR-378c, miR-544a, miR-1839-5p, miR-101c, miR-7862, miR-378b, miR-125b-2-3p, miR-378d, miR-30c-1-3p, miR-1b-5p, miR-382-3p, miR-23a-3p, miR-2411-3p, miR-378e, miR-2483-3p, miR-6535, novel_68, miR-329-5p, miR-2319b, miR-541-5p, miR-126b-5p, miR-7-1-3p, miR-668-5p, miR-378f, miR-409-5p, miR-18a-3p, miR-3065-5p, miR-361-3p, miR-8095, miR-154a, miR-2285x, miR-3964, miR-147-5p, miR-382-3p, miR-2285n, miR-101-3p, miR-23b-3p, miR-23c, miR-                                                                                                                                                                                                                                                                                    |
| WDR12  | ENSOARGO(WD repea | 378h, novel_121, miR-18a-3p, miR-6517, miR-378i, miR-345-3p, miR-1246, miR-3578, miR-378a-3p, miR-29a-5p, miR-2285b, miR-329a-5p, novel_127, miR-196a-3p, miR-2285p, miR-374a-5p, miR-3071-3p, miR-30c-2-3p, miR-422a, miR-345-3p, miR-544-3p, miR-582-5p, miR-216b-5p, miR-6130, miR-877-5p, miR-378a-3p, miR-30c-1-3p, miR-574-5p, miR-503-3p, miR-874-3p, miR-625-5p, novel_99, miR-1827, miR-582-5p, miR-488-3p, miR-299, miR-23b, miR-224-5p, miR-145-3p, miR-378c, miR-122-5p, miR-338-3p, miR-539-5p, miR-378c, miR-4510, miR-145a-3p, novel_9, miR-2332, miR-3604                                                                                                                                                                                                                                                            |

miR-34b-5p, miR-296-3p, miR-363-5p, miR-1343-5p, miR-503-5p, miR-224-5p, miR-330-3p, let-7g-5p, miR-503-5p, miR-185-5p, miR-103, miR-187-3p, miR-130a-3p, miR-29b, miR-24-3p, miR-211, miR-326-3p, miR-449a, miR-1193, miR-495-3p, miR-2285x, miR-128-1-5p, miR-147-5p, miR-199c, miR-6402, miR-15a, let-7i, miR-34c, miR-16a, miR-34b, miR-29a-3p, miR-7-1-3p, miR-107, miR-450b-3p, miR-1291, miR-6395, miR-6516-3p, miR-195a-5p, miR-379-5p, miR-9851-3p, miR-18b, miR-2387, miR-2285ab, miR-18a-3p, miR-24-2-5p, miR-490-3p, miR-181a-2-3p, miR-2403, miR-1, miR-200c-3p, miR-543-5p, miR-107, miR-200c, miR-2285af, let-7c-5p, miR-30c-2-3p, miR-378h, miR-24-2-5p, miR-214-5p, let-7d, miR-411-3p, let-7a-2-3p, miR-200b-3p, miR-128-3p, miR-134, miR-30a-5p, miR-29d-3p, miR-378c, miR-1306-5p, miR-103b, miR-486b-3p, miR-204-5p, miR-28-5p, miR-5100, miR-370-5p, miR-410-5p, miR-29b-3p, miR-331-3p, miR-374c-3p, miR-34c-5p, miR-615-5p, miR-370-3p, let-7g-3p, miR-671-5p, miR-485-5p, miR-190a-3p, miR-18a, miR-3154, miR-30c-1-3p, miR-4532, miR-2330-5p, miR-424-5p, let-7a-5p, miR-3085-3p, let-7e, miR-1306-5p, miR-326, miR-362-3p, miR-9788-3p, miR-27a-3p, miR-299a-5p, miR-2426, miR-378c, miR-484, miR-378b, miR-7857, miR-8095, miR-541-3p, novel\_60, miR-2285f, miR-335, miR-4726-5p, miR-30b-5p, miR-769-5p, miR-2285y, miR-371a-5p, miR-378e, miR-27a-3p, let-7d-5p, miR-452-3p, miR-3064-5p, miR-7977, novel\_94, miR-361-3p, miR-130a-5p, miR-125b-2-3p, miR-146a-5p, miR-760-3p, miR-466i-5p, miR-30d, miR-34b-5p, miR-30b-3p, miR-221-5p, miR-185-3p, miR-216a-5p, miR-148b-3p, miR-200b, miR-15a-5p, miR-383-5p, miR-532-3p, miR-378d, miR-362-3p, novel\_133, miR-188-3p, miR-5703, miR-140-3p, miR-206-3p, miR-338-3p, let-7b-5p, miR-4510, miR-378c, miR-6516-3p, miR-664a, miR-708-5p, miR-208b-5p, miR-424-5p, miR-6130, miR-193b-3p, miR-22-3p, novel\_32, miR-204-

miR-20a-3p, miR-2319b, miR-2284g, miR-3064-5p, miR-664b, miR-126b-5p, miR-7977, miR-499b-5p, miR-378e, miR-378g, miR-4443, miR-27a-3p, miR-199b-5p, miR-378j, miR-129b-5p, miR-3963, miR-1983, miR-9-3p, miR-3956-3p, miR-3059-5p, novel\_60, miR-2447, miR-2284j, miR-6527, novel\_111, miR-361-3p, miR-423-5p, miR-101-3p, miR-301a-5p, miR-107-5p, miR-371a-5p, miR-769-5p, miR-3968, miR-499a-5p, miR-151a-3p, novel\_4, miR-27a-3p, miR-5010-3p, miR-153, miR-216a-3p, miR-9788-3p, miR-148b-5p, miR-301b-5p, miR-378b, miR-30b-3p, miR-299a-5p, miR-2426, miR-378c, miR-1388-5p, miR-16-2-3p, miR-2284aa, miR-494-3p, miR-382-3p, miR-376b, miR-33a-5p, miR-744-3p, miR-2284b, miR-378d, miR-1306-5p, novel\_115, miR-29b-1-5p, miR-505, miR-491-5p, miR-3085-3p, miR-103a-2-5p, miR-146b, miR-199b-5p, miR-153-3p, miR-2331-3p, miR-140-5p, miR-545-3p, miR-378a-3p, miR-552-3p, miR-376e-3p, miR-877-5p, miR-155-5p, miR-151b, novel\_25, miR-22-3p, miR-204-3p, miR-129b-3p, miR-345-5p, miR-1827, novel\_99, miR-625-5p, miR-3074-5p, miR-378c, miR-206-3p, miR-98-3p, miR-769-5p, miR-338-3p, miR-3184-5p, miR-338-5p, miR-320e, miR-3604, miR-324-3p, miR-151-3p, miR-664a, miR-155-5p, miR-17-3p, miR-130b-5p, miR-487a-5p, miR-4492, miR-708-5p, miR-208b-5p, miR-129-5p, miR-18a-3p, miR-548e-3p, miR-200b, miR-7859, miR-2284h-5p, miR-151-5p, miR-2300b-3p, miR-2366, miR-378i, miR-1197-5p, miR-188-3p, miR-378a-3p, miR-98-3p, miR-2904, miR-2284u, miR-148a-5p, miR-2285w, miR-216c-5p, miR-376c-3p, miR-377-5p, miR-130a-5p, miR-421-5p, miR-376a-5p, miR-664b-3p, miR-29b-1-5p, miR-146a-5p, miR-2432, miR-486-3p, miR-26a-5p, miR-210-5p, miR-422a, miR-324-3p, miR-760-3p, miR-2284m, miR-2484, miR-3074-5p, novel\_68, miR-26b-5p, miR-670-3p, miR-669, miR-216a-3p, miR-3065-5p, miR-18a-3p, miR-378b, miR-1306, miR-119-

USE1

ENSOARGO(unconven

miR-2284ab, miR-29b, miR-30b-3p, miR-450c-3p, miR-194-5p, miR-194-3p, miR-103, miR-339-5p, miR-665, miR-103a-3p, miR-125a-5p, miR-660, miR-483-3p, miR-196b-5p, miR-378a-5p, miR-32, miR-330-3p, miR-197-5p, miR-194a, miR-224-5p, let-7j, miR-345-5p, miR-363-5p, miR-6240, miR-2319a, miR-6395, miR-450b-3p, miR-107, miR-378b, miR-376b-5p, miR-669, miR-2404, miR-29a-3p, miR-299b-3p, miR-34b, miR-329-5p, miR-22-5p, miR-92a-3p, miR-29a, miR-34c, novel\_87, miR-33a-3p, miR-382-5p, novel\_27, miR-449a, miR-326-3p, miR-29c-3p, miR-155-5p, miR-2427, miR-29d-3p, miR-330-5p, miR-196a-5p, miR-1290, miR-582-3p, miR-450a-1-3p, miR-2284z, miR-302a-5p, miR-483-3p, novel\_79, miR-299a-3p, miR-6517, miR-107, miR-92a-3p, miR-339a, miR-205-5p, miR-664-3p, miR-1957a, miR-376c-5p, miR-3065-3p, miR-450c-5p, miR-92b-3p, miR-29b-2-5p, miR-3074-1-3p, miR-376c-5p, miR-1248, miR-671-5p, miR-767, miR-345-5p, miR-376c-5p, miR-503-3p, miR-331-5p, miR-301, miR-223-5p, miR-2284n, miR-34c-5p, miR-374c-3p, miR-769, miR-25-3p, miR-2355-5p, miR-125a, miR-767-5p, miR-331-5p, miR-331-3p, miR-125b-5p, miR-100-3p, miR-410-5p, novel\_63, miR-29b-3p, miR-551b-3p, miR-193a-5p, miR-2284v, miR-16-2-3p, miR-2284aa, miR-450b-5p, miR-30b-3p, miR-3962, miR-455-3p, miR-153, miR-147a, miR-142-3p, miR-5010-3p, novel\_4, novel\_78, miR-330-3p, miR-153-3p, miR-3955-3p, miR-29b-1-5p, miR-199a-3p, miR-326, miR-33a-5p, miR-335-3p, miR-203-3p, miR-25, miR-489, miR-7977, miR-664b, miR-139-5p, miR-628-3p, miR-3958-3p, miR-450a-5p, miR-769-5p, miR-371a-5p, novel\_82, miR-154a, novel\_111, miR-194b-5p, miR-32-3p, miR-363-3p, miR-133a-3p, miR-34a-5p, miR-493-3p, miR-142-3p, miR-188-3p, miR-199a-3p, miR-532-3p, miR-328-3p, miR-212-5p, miR-3653-3p, miR-34b-5p, miR-299-3p, miR-2284m, miR-466i-5p, miR-125b, miR-210-5p, miR-29b-1-5p, miR-142a-3p, miR-369-3p, miR-345-3p, miR-

miR-31-3p, miR-138-5p, miR-370-5p, miR-410-5p, miR-34c-3p, miR-145-3p, miR-6128, miR-1814c, novel\_48, miR-23a-5p, let-7g-3p, miR-10b-3p, miR-18a, miR-320a, miR-503-3p, miR-381-3p, miR-488-3p, miR-374c-3p, miR-92a-3p, miR-107, miR-181b-5p, miR-200c-3p, miR-17-3p, miR-450a-2-3p, miR-2898, miR-200c, miR-1271-3p, miR-2284a, miR-1957a, miR-376c-5p, miR-376b-5p, miR-2478, miR-181a-2-3p, miR-29b-2-5p, miR-30a-3p, let-7a-2-3p, miR-200b-3p, miR-128-3p, miR-300, miR-134, miR-582-3p, miR-6516-5p, miR-22-5p, miR-92a-3p, miR-382-5p, miR-16a, miR-6402, miR-133a-5p, miR-15a, miR-326-3p, miR-1193, miR-17-3p, miR-342-3p, miR-6516-3p, miR-195a-5p, miR-19a-3p, miR-107, miR-378b, miR-18b, miR-2387, miR-146b-3p, miR-466f-3p, miR-1343-5p, miR-224-5p, miR-363-5p, miR-101-5p, miR-219a-1-3p, miR-30b-3p, miR-138, miR-3071-5p, miR-374b-3p, miR-1434-3p, miR-103, miR-544b, miR-2284d, miR-432-5p, miR-487a-5p, miR-424-5p, miR-6516-3p, miR-17-3p, miR-664a, miR-29b-2-5p, miR-6134, miR-145a-3p, miR-539-5p, miR-582-5p, miR-18a-5p, miR-204-3p, miR-544-3p, miR-6516, miR-532-5p, miR-370-5p, miR-21-3p, miR-466i-5p, miR-760-3p, miR-320d, miR-2284m, miR-196a-3p, miR-146a-5p, miR-130a-5p, miR-125b-2-3p, miR-4429, miR-19b-3p, miR-140-3p, miR-188-3p, miR-1193, miR-616-3p, miR-15a-5p, miR-148b-3p, miR-200b, miR-383-5p, miR-3600, miR-548e-3p, miR-2285y, miR-382-3p, miR-452-5p, miR-181d-5p, miR-3059-5p, miR-27a-3p, miR-499b-5p, miR-326, miR-342, miR-320b, miR-758-3p, miR-652-5p, miR-376b, miR-33a-5p, miR-494-3p, miR-424-5p, miR-16-2-3p, miR-2284aa, miR-544a, miR-450b-5p, miR-30b-3p, miR-216a-3p, miR-27a-3p, novel\_4, miR-134-5p, miR-6740-5p, miR-2284k, miR-2433, miR-1197-3p, miR-16-5p, miR-2284v, miR-200a-5p, miR-301, miR-25-3p, miR-300-3p, miR-2285aa, miR-874-3p, miR-152-3p, miR-2285b, miR-29a-5p, miR-2284v, novel\_39, miR-92b-3p, miR-150b, miR-199a-5p, miR-204-3p, miR-199a-5p, miR-199b-5p, miR-7857-3p, miR-670-3p, miR-665-5p, miR-2447, miR-2285ad, miR-3184-3p, miR-199b-5p, miR-466i-5p, miR-2285j, miR-199b-5p, miR-210-5p

FRYL ENSOARGO(C FRY-like

KANK2 ENSOARGO(C KN motif

miR-186-5p, miR-2312, let-7g-3p, miR-21-3p, miR-2331-3p, miR-140-5p, miR-504-5p, miR-378a-3p, miR-15b-5p, miR-877-5p, miR-204-3p, novel\_32, miR-6130, miR-544-3p, miR-132-5p, miR-27a-5p, miR-377-3p, miR-664a-5p, miR-665, miR-29d-5p, miR-324-3p, miR-132-5p, miR-424-5p, miR-208b-5p, miR-155-5p, miR-6516-3p, miR-3074-2-3p, miR-665-5p, miR-4510, miR-145a-3p, miR-378c, miR-338-3p, miR-3184-5p, miR-29c-5p, miR-769-5p, miR-378a-3p, miR-1197-5p, novel\_133, miR-378i, miR-148a-5p, miR-142-3p, miR-3600, miR-3960, miR-18a-3p, novel\_83, miR-1247-5p, miR-15a-5p, miR-487a-3p, miR-185-3p, miR-422a, miR-500a-5p, miR-324-3p, miR-618, miR-3653-3p, miR-30b-3p, miR-2887, miR-503-5p, miR-146a-5p, miR-664b-3p, miR-29b-1-5p, miR-140-5p, miR-877-3p, miR-504, miR-452-3p, miR-10b, miR-203-3p, miR-378g, miR-378e, miR-769-5p, miR-2284q, miR-374a-3p, miR-4726-5p, miR-6527, miR-2285f, miR-212-3p, miR-541-3p, miR-2447, miR-423-5p, miR-1285-5p, miR-361-3p, miR-877-3p, miR-541, miR-378b, miR-3120-5p, miR-2426, miR-544a, miR-378c, miR-548w, miR-1343-3p, miR-2300a-5p, miR-216a-3p, miR-496-5p, miR-16b, miR-29b-1-5p, novel\_19, miR-342, miR-146b, miR-25-5p, miR-487b-5p, novel\_124, miR-424-5p, miR-4532, miR-378d, miR-3154, miR-200a-5p, miR-301, miR-2448-3p, miR-488-3p, miR-485-5p, miR-1248, miR-767, miR-615-5p, miR-1271, miR-874-3p, miR-769, miR-2332, miR-2433, miR-767-5p, miR-16-5p, miR-3607-3p, miR-378c, miR-374a-3p, miR-23b-5p, miR-128-3p, miR-582-3p, novel\_121, miR-486-5p, miR-582-3p, miR-378h, miR-322-5p, miR-543-5p, novel\_127, miR-127-5p, miR-6536, miR-191-3p, miR-2285b, novel\_39, miR-216a-3p, miR-3591-3p, miR-18a-3p, miR-2285ab, miR-195a-5p, miR-378f, miR-146b-5p, miR-9851-3p, miR-450b-3p, miR-1291, miR-378b, novel\_69, miR-16a, miR-6402, miR-15a, miR-147-5p, novel\_1, miR-3957-3p, miR-342-3p, novel\_27, novel\_23, miR-378b, novel\_99, miR-2285t, miR-3120-3p, novel\_23, miR-2285ad, miR-496-5p, novel\_116, miR-484, miR-16-1-3p, miR-19b-3p, miR-493-3p, miR-16-1-3p, miR-216c-5p, miR-130b-5p, miR-195a-3p, miR-4532, miR-125a-3p, miR-1306-5p, miR-324-3p, miR-491-5p, novel\_96, miR-221-5p, miR-452-3p, miR-221-5p, miR-2331-3p, miR-552-3p, miR-532-5p, miR-370-3p, miR-216b-5p, miR-6130, miR-4443, miR-669, miR-361-3p, miR-500a-3p, miR-150-5p, miR-1306, miR-19a-3p, miR-10b-3p, novel\_99, miR-671-5p, miR-212-3p, miR-4510, novel\_42, miR-433-5p, miR-665-5p, miR-361-3p, miR-10b-3p, miR-2332, miR-665, novel\_87, miR-2285y, miR-128-1-5p, miR-4726-5p, miR-130b-5p, miR-500, miR-2285t

2-Sep ENSOARGO(septin 2) miR-6516-3p, miR-101a-5p

MRPL1 ENSOARGO(mitochondrial ribosomal protein L1) miR-6516-3p, miR-101a-5p

ANO1 ENSOARGO(anoctamin 1) miR-6516-3p, miR-101a-5p

CLPX ENSOARGO(caseinolytic phosphatase X) miR-6516-3p, miR-101a-5p

miR-486b-3p, miR-2284k, miR-1260b, miR-145-3p, miR-2284v, miR-16-5p, miR-485-5p, miR-3074-1-3p, miR-23b, miR-320a, miR-200a-5p, miR-2284n, miR-487a-3p, miR-141-3p, miR-370-3p, miR-181b-5p, miR-200a-3p, miR-107, miR-6119-5p, miR-2285af, miR-1260a, miR-3071-3p, miR-148b-5p, miR-2284a, miR-1957a, miR-200a, miR-2284y, miR-3529-3p, miR-181a-2-3p, miR-30a-3p, miR-300, miR-155-5p, miR-128-3p, miR-1290, miR-345-3p, miR-322-5p, miR-2284z, miR-199c, miR-147-5p, miR-15a, miR-33a-3p, miR-16a, miR-24-3p, miR-342-3p, miR-135a-2-3p, miR-495-3p, miR-2285x, miR-107, miR-195a-5p, miR-376a-2-5p, miR-6516-3p, miR-2319a, miR-3065-5p, miR-216a-3p, miR-6535, miR-320b, miR-124-5p, miR-452-5p, miR-377-3p, miR-2411-3p, let-7d-3p, miR-432-3p, miR-432-3p, miR-503-3p, miR-539-3p, miR-382, miR-1260b, miR-16b, miR-380-3p, miR-2284ab, miR-497-5p, miR-542-3p, miR-181a-5p, miR-1434-3p, miR-223-3p, miR-708-3p, miR-2284d, miR-103, miR-103a-3p, miR-155-5p, miR-424-5p, miR-874-5p, miR-2285j, miR-655-3p, miR-30a-3p, miR-6525, miR-181c-5p, miR-539-5p, miR-3074-2-3p, miR-154b-3p, miR-186-5p, miR-299, miR-655, miR-377-3p, miR-155-5p, miR-877-5p, miR-15b-5p, miR-216b-3p, miR-2284m, miR-618, miR-345-3p, miR-380-3p, miR-486-3p, miR-487a, miR-195a-3p, novel\_73, miR-4429, miR-2284u, miR-148a-5p, miR-664-5p, novel\_133, miR-2904, miR-15a-5p, miR-340-5p, miR-23c, miR-23b-3p, miR-487a-3p, miR-199a-3p, miR-30d-3p, miR-3600, miR-2284q, miR-154-3p, miR-490-5p, miR-101-3p, novel\_82, miR-218-5p, miR-212-3p, miR-181d-5p, miR-2284j, miR-219a-5p, miR-409-5p, miR-361-3p, miR-129b-5p, miR-2483-3p, miR-203-3p, miR-2284g, miR-7977, miR-3955-3p, miR-153-3p, novel\_103, miR-342, miR-199a-3p, miR-320b, miR-16b, miR-101b-3p, miR-424-5p, miR-2284b, miR-23a-3p, miR-299a-5p, miR-2284aa, miR-296-5p, miR-484, miR-153, miR-148b-5p, miR-216a-3p, miR-199b-3p



miR-539-5p, miR-3074-2-3p, miR-2330-3p, miR-10b-5p, miR-6134, miR-17-3p, miR-6516-3p, miR-140-5p, miR-221-5p, miR-182-5p, miR-21-3p, miR-139-5p, miR-877-5p, miR-204-3p, miR-2312, novel\_99, miR-20a, miR-2432, miR-374a-5p, miR-196a-3p, miR-185-3p, miR-216a-5p, miR-106a, miR-2284m, miR-320d, miR-221-5p, miR-34b-5p, miR-200b, miR-148b-3p, miR-222-5p, miR-532-3p, miR-2300b-3p, miR-1193, miR-5703, miR-2904, miR-4429, miR-452-5p, miR-181d-5p, miR-2285f, miR-219a-2-3p, miR-107-5p, miR-371a-5p, miR-2285y, miR-335, miR-374a-3p, miR-10b, miR-3082-5p, miR-27a-3p, miR-199b-5p, miR-494-3p, miR-106a-5p, miR-33a-5p, miR-326, miR-320b, miR-3955-3p, miR-27a-3p, miR-9788-3p, miR-10b, miR-30b-3p, miR-101a-5p, miR-3120-5p, miR-1306-5p, miR-374b, miR-374a-3p, miR-93, miR-323-3p, miR-2332, miR-409-3p, miR-3969, miR-331-3p, miR-374b-3p, miR-486b-3p, miR-141-3p, miR-374c-3p, miR-34c-5p, miR-199a-5p, miR-488-3p, miR-3154, miR-17-5p, miR-320a, let-7g-3p, miR-3074-1-3p, miR-3529-3p, miR-2403, miR-495-5p, miR-2385-3p, miR-30a-3p, miR-24-2-5p, miR-2284a, miR-490-3p, miR-199a-5p, miR-1957a, miR-217, miR-181b-5p, miR-17-3p, miR-92a-3p, miR-376a-5p, miR-545-5p, miR-582-3p, miR-134, miR-345-3p, miR-582-3p, miR-10a-5p, miR-200b-3p, novel\_120, miR-2285x, miR-17-3p, miR-495-3p, miR-2428, miR-326-3p, miR-449a, miR-20a-5p, miR-33a-3p, miR-34c, miR-92a-3p, miR-147-5p, miR-203b-5p, miR-10a-5p, miR-34b, miR-2404, miR-146b-3p, miR-2285ab, miR-21c, miR-450b-3p, miR-6516-3p, miR-376a-2-5p, miR-363-5p, miR-345-5p, miR-296-3p, miR-17-5p, miR-106a-5p, miR-466f-3p, miR-1343-5p, miR-133b-5p, miR-377-5p, miR-432-5p, miR-20b, miR-181a-5p, miR-873a-5p, miR-219a-1-3p, miR-30b-3p, miR-21-5p, miR-129-2-3p, miR-214, miR-665-5p, miR-346, miR-6525, miR-181c-5p, miR-122-5p, miR-30e-3p, miR-2285i, miR-665, miR-30a-3p, miR-210b-3p, miR-32-

miR-30d-5p, miR-339b, miR-660-5p, miR-30c-1-3p, miR-216b-3p, miR-139-5p, miR-6130, miR-377-3p, miR-10a, miR-499b-3p, miR-22-3p, miR-320e, miR-132-5p, miR-874-5p, miR-145a-3p, miR-4510, miR-214, miR-10b-5p, miR-3184-5p, miR-5703, miR-218-1-3p, miR-16-1-3p, miR-3960, miR-18a-3p, miR-212-5p, miR-485-3p, miR-148b-3p, miR-487a-3p, miR-2284h-5p, miR-1247-5p, novel\_17, miR-30b, miR-219b-5p, miR-760-3p, miR-299-3p, miR-2285w, miR-486-3p, miR-2411, miR-452-3p, miR-139-5p, miR-3064-5p, miR-499a-3p, miR-4443, miR-30b-5p, miR-3968, miR-4726-5p, miR-2284q, miR-541-3p, miR-3956-3p, novel\_60, miR-361-3p, miR-423-5p, miR-10b, miR-541, miR-143-5p, miR-296-5p, miR-3120-5p, miR-21b, miR-105-1, miR-2300a-5p, novel\_4, novel\_78, miR-455-3p, miR-5126, novel\_103, miR-342, miR-505, miR-3085-3p, miR-214-3p, miR-2330-5p, miR-744-3p, miR-30c-1-3p, miR-1b-5p, miR-4532, miR-8485, miR-301, miR-30e-5p, miR-3154, miR-1248, miR-7144-5p, miR-874-3p, miR-1271, miR-29b-3p, miR-2433, miR-331-3p, miR-486b-3p, miR-6128, miR-365a-5p, miR-3578, miR-30a-5p, miR-29d-3p, miR-218-2-3p, miR-10a-5p, miR-105-2, miR-299a-3p, novel\_79, miR-2411-5p, miR-125a-3p, miR-339a, miR-30f, miR-3071-3p, miR-30c-2-3p, miR-127-5p, novel\_127, miR-152-3p, miR-3064-5p, miR-1957a, novel\_39, miR-148a-3p, miR-3141, miR-18a-3p, miR-1291, miR-9851-3p, miR-10a-5p, miR-299b-3p, novel\_69, miR-29a-3p, miR-670-3p, miR-2404, miR-669, miR-576-3p, miR-29a, miR-128-1-5p, miR-342-3p, miR-2285x, miR-29c-3p, miR-2428, miR-197-3p, miR-22-3p, miR-16-1-3p, miR-29b, miR-744-5p, miR-188-5p, miR-2284x, miR-339-5p, miR-3431, miR-377-3p, novel\_51, miR-365b-5p, miR-3141, miR-105-5p, miR-466f-3p, miR-660, miR-382, miR-432-3p, miR-432-3p, miR-2285r, miR-6412, miR-539-3p

miR-214, miR-134-5p, miR-486b-3p, miR-874-5p, miR-324-3p, miR-132-5p, miR-2433, miR-2285j, miR-3957, miR-22-3p, miR-193b-3p, miR-141-3p, miR-874-3p, miR-30c-1-3p, miR-3957-5p, miR-485-5p, miR-671-5p, miR-3154, miR-486-3p, miR-4286, novel\_127, miR-200a-3p, miR-200c-3p, miR-30c-2-3p, miR-324-3p, miR-200c, miR-2397-5p, miR-134-5p, miR-200b, miR-9-5p, miR-505-5p, miR-429-3p, miR-18a-3p, miR-200b-3p, miR-5703, miR-1193, miR-1343-5p, miR-134, miR-615-3p, miR-9-5p, miR-193b-3p, miR-6123, miR-128-1-5p, miR-615, novel\_82, miR-378g, miR-4792, miR-1291, miR-18a-3p, miR-361-3p, miR-4532, miR-30c-1-3p, miR-363-5p, miR-2330-5p, miR-1388-3p, miR-214-3p, miR-193a-3p, miR-1343-5p, miR-134-3p, miR-432-5p, miR-744-5p, miR-22-3p, miR-432, miR-296-5p

MLST8 ENSOARGOC MTOR ass,

DRD2 ENSOARGOC dopamine

miR-101-5p, miR-17-5p, miR-106a-5p, miR-2411-3p, miR-196b-5p, miR-103a-3p, miR-340-3p, miR-665, let-7g-5p, miR-103, miR-544b, miR-20b, miR-6238, miR-1843b-5p, miR-1285, miR-542-3p, miR-1434-3p, miR-653, miR-708-3p, miR-374b-3p, miR-3071-5p, miR-450c-3p, miR-16b, miR-2284x, miR-497-5p, miR-136-3p, miR-3959-3p, miR-6402, miR-20a-5p, miR-15a, miR-3613, let-7i, miR-16a, miR-379-3p, novel\_1, miR-3074-5p, miR-655-5p, miR-144-3p, miR-107, miR-412-3p, let-7e-5p, miR-6395, miR-195a-5p, miR-2319a, miR-181a-2-3p, miR-29b-2-5p, miR-30a-3p, miR-2478, miR-2284a, miR-450c-5p, let-7g, miR-200a, miR-664-3p, miR-2285af, let-7c-5p, let-7f-5p, miR-28-3p, miR-200a-3p, miR-107, miR-6516-5p, miR-322-5p, novel\_121, miR-450a-1-3p, miR-1290, miR-345-3p, miR-196a-5p, miR-3591-5p, let-7d, miR-411-3p, miR-28a-3p, miR-16-5p, miR-93, miR-135a-1-3p, miR-34c-3p, miR-144, miR-331-5p, miR-574-5p, miR-141-3p, miR-2285aa, miR-154b-5p, miR-223-5p, miR-331-5p, miR-301, miR-17-5p, miR-93-5p, miR-329b, miR-1814c, miR-7144-5p, miR-3074-1-3p, miR-20b-5p, miR-424-5p, miR-106a-5p, miR-101b-3p, let-7a-5p, miR-2284b, let-7c-3p, miR-2310, novel\_103, miR-16b, miR-106b-5p, miR-182-5p, miR-29b-1-5p, miR-505, miR-214-3p, let-7e, miR-548w, miR-222-5p, miR-5010-3p, miR-539-5p, miR-1185-3p, miR-455-3p, miR-143-5p, miR-301b-5p, miR-544a, miR-3059-5p, miR-877-3p, miR-101-3p, miR-382-3p, miR-301a-5p, miR-450a-5p, miR-2285t, miR-2319b, miR-20a-3p, miR-664b, miR-126b-5p, miR-1185-2-3p, let-7d-5p, miR-136-5p, miR-544-5p, novel\_94, miR-1983, miR-216c-5p, miR-183-5p, miR-20a, miR-130a-5p, miR-29b-1-5p, novel\_17, miR-210-5p, miR-345-3p, miR-500a-5p, miR-98-5p, miR-202-5p, miR-106a, let-7k, miR-21-3p, miR-2484, miR-3653-3p, miR-106a, miR-30d-3p, miR-15a-5p, miR-340-5p, miR-328-3p, miR-1961, miR-3074-5p, miR-145a-3p, miR-3184-3p, miR-530-5p, let-7b, miR-

miR-365a-5p, miR-6128, miR-16-5p, miR-486b-3p, miR-2433, miR-370-5p, miR-331-3p, miR-125b-5p, miR-26c, miR-34c-5p, miR-300-3p, miR-376c-3p, miR-154b-5p, miR-874-3p, miR-370-3p, miR-125a, miR-876-3p, miR-10b-3p, let-7g-3p, miR-485-5p, miR-671-5p, miR-301, miR-200a, miR-30a-3p, miR-4286, miR-17-3p, miR-200c-3p, novel\_127, miR-2285af, miR-200c, miR-322-5p, miR-545-5p, miR-2285ad, miR-429-3p, miR-6517, miR-412, miR-431, miR-200b-3p, miR-128-3p, let-7a-2-3p, miR-3578, miR-449a, miR-342-3p, miR-1193, miR-17-3p, miR-495-3p, miR-656-5p, miR-203b-5p, miR-6123, miR-15a, miR-4324, miR-1247-3p, miR-576-3p, miR-6529b, miR-34c, miR-16a, miR-323a-5p, miR-2404, novel\_69, miR-34b, miR-670-3p, miR-6535, miR-3074-5p, miR-320b, miR-3120-3p, miR-26b-5p, miR-450b-3p, miR-1291, miR-412-3p, miR-7975, miR-6395, miR-195a-5p, miR-1306, miR-216a-3p, miR-18a-3p, miR-378b, let-7a-2-3p, miR-6240, miR-668-3p, miR-628-5p, miR-378a-5p, miR-125a-5p, miR-377-3p, miR-197-5p, miR-330-3p, miR-365b-5p, miR-432-5p, miR-194-3p, novel\_116, miR-149-5p, miR-2355-3p, miR-31-5p, miR-26b-3p, miR-377-5p, miR-30b-3p, miR-16b, miR-497-5p, miR-188-5p, miR-27b-3p, miR-432, miR-1434-3p, miR-450c-3p, miR-22-3p, novel\_23, miR-6525, miR-3184-5p, miR-6134, miR-145a-3p, miR-3074-5p, miR-3184-3p, miR-4510, miR-3074-2-3p, miR-664a, miR-17-3p, miR-874-5p, miR-1468-5p, miR-424-5p, miR-30e-3p, miR-151-3p, miR-324-3p, miR-132-5p, miR-30a-3p, miR-665, miR-377-3p, miR-6130, miR-323-5p, miR-22-3p, miR-151b, miR-15b-5p, miR-140-5p, miR-221-5p, miR-2331-3p, miR-548o-3p, miR-370-5p, miR-216b-3p, let-7g-3p, miR-186-5p, miR-376a-5p, miR-377-5p, miR-376c-3p, miR-142a-3p, miR-130a-5p, miR-2432, miR-486-3p, miR-216c-5p, miR-2285w, miR-466i-5p, miR-34b-5p, miR-221-5p, miR-21-3p, novel\_17, miR-26a-5p, miR-125b, miR-7859, miR-15a-5p, miR-222-5p, miR-200b, miR-199a-3p, miR-151-5p, miR-2284b-5p, miR-

miR-1343-5p, miR-412, miR-1224-5p, miR-429-3p, miR-134-5p, miR-9-5p, miR-322-5p, miR-505-5p, novel\_96, novel\_127, miR-152-3p, miR-127-5p, miR-3064-5p, miR-29a-5p, miR-450b-5p, miR-93-5p, miR-376c-5p, miR-23b, miR-20b-5p, miR-1248, miR-2318, miR-2355-5p, miR-125a, miR-1271, miR-300-3p, miR-125b-5p, miR-134-5p, miR-16-5p, miR-1197-3p, miR-197-3p, miR-22-3p, novel\_23, miR-223-3p, miR-1843b-5p, miR-497-5p, miR-4508, miR-27b-3p, miR-16b, miR-3955-5p, miR-411-5p, miR-412-5p, miR-3535, miR-3431, miR-105-5p, novel\_51, miR-194a, miR-296-3p, miR-483-3p, miR-628-5p, miR-150-5p, miR-1306, miR-376b-5p, miR-148a-3p, miR-26b-5p, novel\_68, miR-3074-5p, miR-329-5p, miR-216b-3p, miR-320c, miR-677, novel\_69, miR-411b-3p, miR-28c, miR-6123, miR-6119-3p, miR-379-3p, miR-29a, miR-29c-3p, miR-199b-5p, miR-34a-5p, miR-493-3p, miR-212-5p, miR-18a-3p, miR-106a, miR-2284h-5p, miR-23b-3p, miR-23c, miR-324-3p, miR-92a-1-5p, miR-26a-5p, miR-210-5p, miR-202-5p, miR-345-3p, miR-329a-5p, miR-2285w, miR-486-3p, miR-500a-3p, miR-411, miR-1895, miR-625-5p, miR-1827, miR-552-3p, miR-296-3p, miR-2331-3p, miR-30c-1-3p, miR-15b-5p, miR-499b-3p, miR-216b-5p, miR-151-3p, miR-665, miR-15b-3p, miR-2285j, miR-874-5p, miR-500, miR-4492, novel\_74, miR-3074-5p, miR-6525, miR-346, miR-2284r, miR-1343-3p, novel\_78, miR-16b, miR-106b-5p, miR-199b-5p, miR-491-5p, miR-23a-3p, miR-8485, miR-2310, miR-96-5p, miR-211-5p, miR-499a-3p, miR-2440, miR-9-5p, miR-2447, miR-361-3p, miR-877-3p, miR-29d-3p, miR-134, miR-105-2, miR-411-3p, miR-483-3p, miR-2411-5p, miR-1271-5p, miR-30c-2-3p, miR-200c, miR-543-5p, miR-450a-2-3p, miR-17-3p, miR-2898, miR-200c-3p, miR-181a-2-3p, miR-199a-5p, miR-3065-3p, miR-376c-5p, miR-376b-5p, miR-28b, miR-320a, miR-17-5p, miR-7144-5p, miR-376c-5p, miR-1814c, miR-370-3p, miR-215-5p, miR-100a-5p, miR-24c-5p, miR-331-3p, miR-135a-5p, miR-20b-5p, miR-212-3p, miR-449a, miR-326-3p, miR-15a, miR-16a, miR-34c, miR-4726-5p, miR-452-3p, miR-329-5p, miR-4792, miR-3064-5p, miR-7977, miR-320b, miR-34b, miR-299b-3p, miR-378g, miR-6535, miR-2387, miR-18a-3p, miR-1291, miR-195a-5p, miR-9851-3p, miR-424-5p, miR-432-3p, miR-4532, miR-326, miR-7-5p, miR-16b, miR-3085-3p, miR-214-3p, miR-134-3p, miR-7b-5p, miR-30b-3p, miR-16b, miR-30b-3p, miR-497-5p, miR-214, miR-16-5p, miR-6134, miR-2285j, miR-665, miR-320e, miR-331-3p, miR-664a, miR-486b-3p, miR-28-5p, miR-708-5p, miR-424-5p, miR-874-3p, miR-2331-3p, miR-1271, miR-34c-5p, miR-15b-5p, miR-151b, miR-133c, miR-671-5p, miR-485-5p, miR-625-5p, miR-1895, miR-329a-5p, miR-183-5p, miR-345-3p, miR-3064-5p, miR-486-3p, miR-127-5p, novel\_127, miR-299-3p, miR-34b-5p, miR-18a-3p, miR-299a-3p, miR-15a-5p, miR-322-5p, miR-151-5p, miR-2366, miR-330-5p, miR-34a-5p

TMEM164 ENSOARGO( transmem

PCYT2 ENSOARGO( phosphat

|       |                   |                                                                                                                                                                                                                                                                                                                                                                                                                                                                                                                                                                                                                                                                                                                                                                                                                                                                                                                                                                                                                                                                                                                                                                                                                                                                                                                                                                                                                                                                                                                                                                                                                                                                                                                                                                                                                                                                                                                                                                                                                                                                                                                                                                                                                                                                                                                                                                                                                                                                                                                                                                                                                                                                                                                                                                                                                                                                                                                                                                                                                                                                                                                                                                                                                                                      |
|-------|-------------------|------------------------------------------------------------------------------------------------------------------------------------------------------------------------------------------------------------------------------------------------------------------------------------------------------------------------------------------------------------------------------------------------------------------------------------------------------------------------------------------------------------------------------------------------------------------------------------------------------------------------------------------------------------------------------------------------------------------------------------------------------------------------------------------------------------------------------------------------------------------------------------------------------------------------------------------------------------------------------------------------------------------------------------------------------------------------------------------------------------------------------------------------------------------------------------------------------------------------------------------------------------------------------------------------------------------------------------------------------------------------------------------------------------------------------------------------------------------------------------------------------------------------------------------------------------------------------------------------------------------------------------------------------------------------------------------------------------------------------------------------------------------------------------------------------------------------------------------------------------------------------------------------------------------------------------------------------------------------------------------------------------------------------------------------------------------------------------------------------------------------------------------------------------------------------------------------------------------------------------------------------------------------------------------------------------------------------------------------------------------------------------------------------------------------------------------------------------------------------------------------------------------------------------------------------------------------------------------------------------------------------------------------------------------------------------------------------------------------------------------------------------------------------------------------------------------------------------------------------------------------------------------------------------------------------------------------------------------------------------------------------------------------------------------------------------------------------------------------------------------------------------------------------------------------------------------------------------------------------------------------------|
| CD59  | ENSOARGO(CD59 mol | <p>miR-1285-5p, miR-877-3p, miR-194b-5p, miR-181d-5p, miR-3059-5p, miR-212-3p, miR-885-5p, miR-379-3p, miR-371a-5p, miR-218-5p, miR-20a-5p, miR-320c, miR-3596, miR-489, miR-3120-3p, miR-505-3p, miR-2387, miR-758-3p, miR-382-3p, miR-106a-5p, miR-491-5p, miR-194a, miR-106b-5p, miR-106a-5p, miR-17-5p, miR-2331-5p, miR-320b, miR-224-5p, miR-20b, miR-421, miR-145b, miR-194-5p, miR-145a-5p, miR-758-3p, miR-653, miR-181a-5p, miR-181c-5p, miR-93, miR-224-5p, miR-134-5p, miR-320e, novel_63, miR-376c-3p, miR-376e-3p, miR-221-5p, miR-2331-3p, miR-874-3p, miR-20b-5p, miR-7144-5p, miR-93-5p, miR-433-3p, miR-17-5p, miR-320a, miR-29a-5p, miR-125b-2-3p, miR-376c-3p, miR-20a, miR-221-5p, novel_96, miR-320d, miR-106a, miR-181b-5p, miR-466i-5p, miR-210-5p, miR-2284h-5p, novel_83, miR-134-5p, miR-7859, miR-24-2-5p, miR-1224-5p, miR-505-3p, miR-548e-3p, miR-106a, miR-378d, miR-411-3p, miR-4429, miR-218-2-3p, miR-5703, miR-134, miR-412-3p, miR-2285k, miR-1291, miR-639b, miR-3141, miR-18a-3p, miR-670-3p, miR-374c-3p, miR-299b-3p, miR-323a-5p, miR-6535, novel_68, miR-10a-5p, miR-320b, miR-28c, miR-576-3p, miR-142b, miR-326-3p, miR-17-3p, miR-3957-3p, miR-138, miR-30b-3p, miR-2889, miR-4508, miR-1285, miR-432, miR-145a-5p, novel_23, miR-22-3p, miR-431-3p, miR-432-5p, novel_116, miR-194-3p, miR-340-3p, miR-339-5p, miR-124-5p, miR-466f-3p, miR-125a-5p, miR-296-3p, miR-224-5p, miR-2411-3p, miR-197-5p, miR-3141, miR-432-3p, miR-296-3p, let-7j, miR-493-5p, miR-130b-5p, miR-363-5p, miR-329a, miR-671-5p, miR-485-5p, miR-3074-1-3p, miR-7144-5p, novel_48, miR-3154, miR-23b, miR-223-5p, miR-874-3p, miR-574-5p, miR-615-5p, miR-141-3p, miR-125a, miR-138-5p, miR-28-5p, miR-134-5p, miR-1306-3p, miR-2433, miR-331-3p, miR-125b-5p, miR-26c, let-7d, miR-10a-5p, miR-134, miR-345-3p, miR-330-5p, miR-505-5p, miR-486-5p, novel_121, miR-134-5p, miR-299a-3p, novel_79, miR-17-3p, miR-2898, miR-543-5p, novel_96, novel_127, miR-200a-3p, miR-664-3p, miR-339a, miR-30c-2-3p, miR-3071-3p, miR-450b-5p, miR-28b, miR-450c-5p, novel_39, miR-200a, miR-4286, miR-504, miR-1983, miR-493-5p, miR-361-3p, miR-1306-3p, miR-3082-5p, miR-4443, let-7d-5p, miR-203-3p, miR-4792, miR-664b, miR-139-5p, miR-126b-5p, miR-450a-5p, miR-499a-5p, miR-1973, miR-877-3p, miR-361-3p, miR-541-3p, miR-3059-5p, miR-2447, let-7i-3p, miR-1296-5p, miR-2426, miR-299a-5p, miR-362-3p, miR-541, miR-10b, miR-329-3p, miR-296-5p, miR-2284r, miR-484, miR-30b-3p, miR-142-5p, miR-9788-3p, miR-216a-3p, miR-455-3p, miR-1343-3p, novel_4, miR-145b, miR-491-5p, miR-1185-5p, miR-326, miR-182-5p, miR-362-3p, miR-505, miR-30c-1-3p, miR-23a-3p, miR-339b, let-7g-3p, miR-1827, miR-625-5p, miR-299, miR-129b-3p, miR-222-5p, miR-130-5p, miR-6130, miR-10a, miR-2284s, let-7d-5p, miR-135b-5p, miR-30f, miR-30d-5p, miR-221, miR-30e-5p, miR-25-3p, miR-26b-5p, miR-32-5p, miR-134-5p, novel_9, miR-92a-3p, miR-135a-5p, miR-222-3p, miR-30b-5p, miR-145-3p, miR-224-5p, miR-363-3p, miR-28a-3p, miR-219b-3p, miR-26a-2-3p, miR-30c, miR-30a-5p, miR-134, miR-30c-5p, miR-134-5p, miR-221-3p, miR-222, miR-92a-3p, miR-30d, miR-28-3p, miR-32, miR-26a-5p, miR-30b, miR-224-5p, miR-125b-2-3p, miR-92b-3p</p> |
| CLCN1 | ENSOARGO(chloride | <p>miR-1285-5p, miR-877-3p, miR-194b-5p, miR-181d-5p, miR-3059-5p, miR-212-3p, miR-885-5p, miR-379-3p, miR-371a-5p, miR-218-5p, miR-20a-5p, miR-320c, miR-3596, miR-489, miR-3120-3p, miR-505-3p, miR-2387, miR-758-3p, miR-382-3p, miR-106a-5p, miR-491-5p, miR-194a, miR-106b-5p, miR-106a-5p, miR-17-5p, miR-2331-5p, miR-320b, miR-224-5p, miR-20b, miR-421, miR-145b, miR-194-5p, miR-145a-5p, miR-758-3p, miR-653, miR-181a-5p, miR-181c-5p, miR-93, miR-224-5p, miR-134-5p, miR-320e, novel_63, miR-376c-3p, miR-376e-3p, miR-221-5p, miR-2331-3p, miR-874-3p, miR-20b-5p, miR-7144-5p, miR-93-5p, miR-433-3p, miR-17-5p, miR-320a, miR-29a-5p, miR-125b-2-3p, miR-376c-3p, miR-20a, miR-221-5p, novel_96, miR-320d, miR-106a, miR-181b-5p, miR-466i-5p, miR-210-5p, miR-2284h-5p, novel_83, miR-134-5p, miR-7859, miR-24-2-5p, miR-1224-5p, miR-505-3p, miR-548e-3p, miR-106a, miR-378d, miR-411-3p, miR-4429, miR-218-2-3p, miR-5703, miR-134, miR-412-3p, miR-2285k, miR-1291, miR-639b, miR-3141, miR-18a-3p, miR-670-3p, miR-374c-3p, miR-299b-3p, miR-323a-5p, miR-6535, novel_68, miR-10a-5p, miR-320b, miR-28c, miR-576-3p, miR-142b, miR-326-3p, miR-17-3p, miR-3957-3p, miR-138, miR-30b-3p, miR-2889, miR-4508, miR-1285, miR-432, miR-145a-5p, novel_23, miR-22-3p, miR-431-3p, miR-432-5p, novel_116, miR-194-3p, miR-340-3p, miR-339-5p, miR-124-5p, miR-466f-3p, miR-125a-5p, miR-296-3p, miR-224-5p, miR-2411-3p, miR-197-5p, miR-3141, miR-432-3p, miR-296-3p, let-7j, miR-493-5p, miR-130b-5p, miR-363-5p, miR-329a, miR-671-5p, miR-485-5p, miR-3074-1-3p, miR-7144-5p, novel_48, miR-3154, miR-23b, miR-223-5p, miR-874-3p, miR-574-5p, miR-615-5p, miR-141-3p, miR-125a, miR-138-5p, miR-28-5p, miR-134-5p, miR-1306-3p, miR-2433, miR-331-3p, miR-125b-5p, miR-26c, let-7d, miR-10a-5p, miR-134, miR-345-3p, miR-330-5p, miR-505-5p, miR-486-5p, novel_121, miR-134-5p, miR-299a-3p, novel_79, miR-17-3p, miR-2898, miR-543-5p, novel_96, novel_127, miR-200a-3p, miR-664-3p, miR-339a, miR-30c-2-3p, miR-3071-3p, miR-450b-5p, miR-28b, miR-450c-5p, novel_39, miR-200a, miR-4286, miR-504, miR-1983, miR-493-5p, miR-361-3p, miR-1306-3p, miR-3082-5p, miR-4443, let-7d-5p, miR-203-3p, miR-4792, miR-664b, miR-139-5p, miR-126b-5p, miR-450a-5p, miR-499a-5p, miR-1973, miR-877-3p, miR-361-3p, miR-541-3p, miR-3059-5p, miR-2447, let-7i-3p, miR-1296-5p, miR-2426, miR-299a-5p, miR-362-3p, miR-541, miR-10b, miR-329-3p, miR-296-5p, miR-2284r, miR-484, miR-30b-3p, miR-142-5p, miR-9788-3p, miR-216a-3p, miR-455-3p, miR-1343-3p, novel_4, miR-145b, miR-491-5p, miR-1185-5p, miR-326, miR-182-5p, miR-362-3p, miR-505, miR-30c-1-3p, miR-23a-3p, miR-339b, let-7g-3p, miR-1827, miR-625-5p, miR-299, miR-129b-3p, miR-222-5p, miR-130-5p, miR-6130, miR-10a, miR-2284s, let-7d-5p, miR-135b-5p, miR-30f, miR-30d-5p, miR-221, miR-30e-5p, miR-25-3p, miR-26b-5p, miR-32-5p, miR-134-5p, novel_9, miR-92a-3p, miR-135a-5p, miR-222-3p, miR-30b-5p, miR-145-3p, miR-224-5p, miR-363-3p, miR-28a-3p, miR-219b-3p, miR-26a-2-3p, miR-30c, miR-30a-5p, miR-134, miR-30c-5p, miR-134-5p, miR-221-3p, miR-222, miR-92a-3p, miR-30d, miR-28-3p, miR-32, miR-26a-5p, miR-30b, miR-224-5p, miR-125b-2-3p, miR-92b-3p</p> |
| PHTF2 | ENSOARGO(putative | <p>miR-1285-5p, miR-877-3p, miR-194b-5p, miR-181d-5p, miR-3059-5p, miR-212-3p, miR-885-5p, miR-379-3p, miR-371a-5p, miR-218-5p, miR-20a-5p, miR-320c, miR-3596, miR-489, miR-3120-3p, miR-505-3p, miR-2387, miR-758-3p, miR-382-3p, miR-106a-5p, miR-491-5p, miR-194a, miR-106b-5p, miR-106a-5p, miR-17-5p, miR-2331-5p, miR-320b, miR-224-5p, miR-20b, miR-421, miR-145b, miR-194-5p, miR-145a-5p, miR-758-3p, miR-653, miR-181a-5p, miR-181c-5p, miR-93, miR-224-5p, miR-134-5p, miR-320e, novel_63, miR-376c-3p, miR-376e-3p, miR-221-5p, miR-2331-3p, miR-874-3p, miR-20b-5p, miR-7144-5p, miR-93-5p, miR-433-3p, miR-17-5p, miR-320a, miR-29a-5p, miR-125b-2-3p, miR-376c-3p, miR-20a, miR-221-5p, novel_96, miR-320d, miR-106a, miR-181b-5p, miR-466i-5p, miR-210-5p, miR-2284h-5p, novel_83, miR-134-5p, miR-7859, miR-24-2-5p, miR-1224-5p, miR-505-3p, miR-548e-3p, miR-106a, miR-378d, miR-411-3p, miR-4429, miR-218-2-3p, miR-5703, miR-134, miR-412-3p, miR-2285k, miR-1291, miR-639b, miR-3141, miR-18a-3p, miR-670-3p, miR-374c-3p, miR-299b-3p, miR-323a-5p, miR-6535, novel_68, miR-10a-5p, miR-320b, miR-28c, miR-576-3p, miR-142b, miR-326-3p, miR-17-3p, miR-3957-3p, miR-138, miR-30b-3p, miR-2889, miR-4508, miR-1285, miR-432, miR-145a-5p, novel_23, miR-22-3p, miR-431-3p, miR-432-5p, novel_116, miR-194-3p, miR-340-3p, miR-339-5p, miR-124-5p, miR-466f-3p, miR-125a-5p, miR-296-3p, miR-224-5p, miR-2411-3p, miR-197-5p, miR-3141, miR-432-3p, miR-296-3p, let-7j, miR-493-5p, miR-130b-5p, miR-363-5p, miR-329a, miR-671-5p, miR-485-5p, miR-3074-1-3p, miR-7144-5p, novel_48, miR-3154, miR-23b, miR-223-5p, miR-874-3p, miR-574-5p, miR-615-5p, miR-141-3p, miR-125a, miR-138-5p, miR-28-5p, miR-134-5p, miR-1306-3p, miR-2433, miR-331-3p, miR-125b-5p, miR-26c, let-7d, miR-10a-5p, miR-134, miR-345-3p, miR-330-5p, miR-505-5p, miR-486-5p, novel_121, miR-134-5p, miR-299a-3p, novel_79, miR-17-3p, miR-2898, miR-543-5p, novel_96, novel_127, miR-200a-3p, miR-664-3p, miR-339a, miR-30c-2-3p, miR-3071-3p, miR-450b-5p, miR-28b, miR-450c-5p, novel_39, miR-200a, miR-4286, miR-504, miR-1983, miR-493-5p, miR-361-3p, miR-1306-3p, miR-3082-5p, miR-4443, let-7d-5p, miR-203-3p, miR-4792, miR-664b, miR-139-5p, miR-126b-5p, miR-450a-5p, miR-499a-5p, miR-1973, miR-877-3p, miR-361-3p, miR-541-3p, miR-3059-5p, miR-2447, let-7i-3p, miR-1296-5p, miR-2426, miR-299a-5p, miR-362-3p, miR-541, miR-10b, miR-329-3p, miR-296-5p, miR-2284r, miR-484, miR-30b-3p, miR-142-5p, miR-9788-3p, miR-216a-3p, miR-455-3p, miR-1343-3p, novel_4, miR-145b, miR-491-5p, miR-1185-5p, miR-326, miR-182-5p, miR-362-3p, miR-505, miR-30c-1-3p, miR-23a-3p, miR-339b, let-7g-3p, miR-1827, miR-625-5p, miR-299, miR-129b-3p, miR-222-5p, miR-130-5p, miR-6130, miR-10a, miR-2284s, let-7d-5p, miR-135b-5p, miR-30f, miR-30d-5p, miR-221, miR-30e-5p, miR-25-3p, miR-26b-5p, miR-32-5p, miR-134-5p, novel_9, miR-92a-3p, miR-135a-5p, miR-222-3p, miR-30b-5p, miR-145-3p, miR-224-5p, miR-363-3p, miR-28a-3p, miR-219b-3p, miR-26a-2-3p, miR-30c, miR-30a-5p, miR-134, miR-30c-5p, miR-134-5p, miR-221-3p, miR-222, miR-92a-3p, miR-30d, miR-28-3p, miR-32, miR-26a-5p, miR-30b, miR-224-5p, miR-125b-2-3p, miR-92b-3p</p> |

miR-23c, miR-23b-3p, miR-412, miR-128-3p, miR-33b-3p, miR-4429, miR-19b-3p, miR-1434-5p, miR-140-3p, miR-330-5p, miR-2408, miR-192-3p, miR-200a, miR-148b-5p, miR-2484, miR-21-3p, miR-200a-3p, miR-3653-3p, miR-30f, miR-26a-5p, miR-223-5p, miR-544-3p, miR-141-3p, miR-21-3p, miR-548o-3p, miR-186-5p, miR-23b, miR-320a, miR-21a-3p, miR-224-5p, miR-323-3p, miR-31-3p, miR-100-3p, miR-544b, miR-412-5p, miR-544a, miR-21-5p, miR-30b-3p, miR-30b-3p, miR-125b-2-3p, miR-412-3p, miR-323b, miR-223-3p, miR-668-3p, miR-23a-3p, miR-323b-3p, miR-326, novel\_103, miR-224-5p, miR-320b, miR-2483-3p, miR-489, miR-26b-5p, miR-20a-3p, miR-378b, miR-19a-3p, miR-299b-5p, miR-3591-3p, miR-3065-5p, miR-21c, miR-216a-3p, miR-7705, miR-326-3p, miR-452-5p, miR-495-3p, miR-421-5p, miR-2440, miR-484, miR-412-3p, miR-3962, miR-2426, miR-16-2-3p, miR-2284aa, miR-1839-5p, miR-151a-3p, novel\_78, miR-409b, miR-5010-3p, miR-27a-3p, miR-145b, miR-142-3p, miR-147a, miR-142-5p, miR-500-5p, miR-421, miR-320b, novel\_103, miR-505, miR-487b-5p, miR-146b, let-7e, let-7a-5p, miR-1388-3p, miR-382-3p, let-7c-3p, miR-8485, miR-493-5p, miR-9-3p, miR-24-1-5p, miR-499b-5p, miR-211-5p, miR-7977, miR-499a-3p, miR-489, miR-3082-5p, miR-203-3p, let-7d-5p, miR-27a-3p, miR-4443, miR-335, miR-2447, miR-2285f, miR-181d-5p, miR-362-5p, miR-1961, miR-2904, miR-217-5p, miR-4429, miR-218-1-3p, let-7a-3p, miR-548e-3p, miR-3600, miR-320d, miR-2284m, miR-202-5p, miR-98-5p, miR-466i-5p, miR-21-3p, let-7k, miR-195a-3p, miR-345-3p, miR-376a-5p, miR-142a-3p, miR-130a-5p, miR-2432, miR-146a-5p, miR-380-3p, let-7f-1-3p, let-7g-3p, miR-345-5p, miR-543-3p, miR-21-3p, miR-216b-3p, miR-552-3p, miR-499b-3p, novel\_25, miR-204-3p, miR-155-5p, let-7i-5p, let-7b-3p, let-7f, miR-151-3p, miR-338-5p, miR-320e, miR-487b-5p, miR-155-5p, let-7b, miR-3958-5p, miR-425-5p, miR-142a-5p, let-7b-5p, miR-181c-5p, miR-708-3p, miR-1434-3p, miR-181a-5p, miR-3071-5p, novel\_23, miR-145a-5p, miR-380-3p, miR-2284ab, miR-27b-3p, miR-133b-5p, let-7g-5p, miR-149-5p, miR-2355-3p, miR-146a, miR-196b-5p, miR-452-5p, miR-493-5p, miR-668-3p, miR-628-5p, miR-432-3p, miR-2285r, miR-432-3p, miR-345-5p, miR-2285ab, miR-3591-3p, miR-410-5p, miR-146b-5p, let-7e-5p, miR-6516-3p, miR-329-5p, miR-670-3p, miR-320c, miR-142b, miR-33a-3p, let-7i, novel\_1, miR-335-5p, miR-211, miR-323c, miR-196a-5p, let-7d, miR-155-5p, miR-412, miR-7641, miR-24-2-5p, miR-2284z, novel\_121, miR-217, let-7c-5p, miR-28-3p, let-7f-5p, miR-181b-5p, miR-24-2-5p, let-7g, miR-2285b, miR-301, miR-137-3p, miR-362-5p, miR-320a, miR-329b, miR-345-5p, novel\_48, miR-503-3p, miR-2284n, miR-100-3p, miR-204-

SHTN1 ENSOARGOC shootin

SASS6 ENSOARGOC SAS-6 ce:

miR-380-5p, miR-200a, miR-490-3p, miR-495-5p, miR-30a-3p, miR-17-3p, miR-200c-3p, miR-152-3p, miR-543-5p, novel\_96, miR-2285af, miR-1260a, miR-219-3p, miR-200c, miR-3071-3p, miR-30f, miR-181c-3p, miR-217, miR-758-5p, miR-1271-5p, miR-582-3p, miR-450a-1-3p, miR-486-5p, miR-2285ad, miR-429-3p, miR-200b-3p, let-7a-2-3p, miR-330-5p, miR-1260b, miR-6128, miR-144-5p, miR-204-5p, miR-486b-3p, novel\_63, miR-370-5p, miR-125b-5p, miR-409-3p, miR-300-3p, miR-34c-5p, miR-223-5p, miR-376c-3p, miR-2285aa, miR-125a, miR-329b, miR-345-5p, let-7g-3p, miR-7144-5p, miR-1248, miR-2448-3p, miR-23b, miR-3154, miR-654-3p, miR-503-3p, miR-345-5p, let-7a-2-3p, miR-380-5p, miR-101-5p, miR-125a-5p, miR-224-5p, miR-2285g, miR-432-5p, miR-3431, miR-134-3p, miR-194-3p, novel\_116, miR-149-5p, miR-187-3p, miR-31-5p, miR-130a-3p, miR-487b-3p, miR-1260b, miR-26a-2-3p, miR-188-5p, miR-2284x, miR-432, miR-873a-5p, miR-1434-3p, miR-450c-3p, miR-374b-3p, miR-211, miR-323c, miR-326-3p, miR-449a, miR-301b-3p, miR-17-3p, miR-1193, miR-495-3p, miR-22-5p, miR-656-5p, miR-6123, miR-502b, miR-4324, miR-502-5p, miR-576-3p, miR-142b, miR-34c, novel\_87, miR-34b, novel\_68, miR-329-5p, miR-6516-3p, miR-2285ab, miR-148a-3p, miR-1306, miR-3065-5p, miR-378b, miR-29b-1-5p, miR-376a-5p, miR-376c-3p, miR-486-3p, miR-2424, miR-143-3p, miR-216c-5p, miR-329a-5p, miR-183-5p, miR-369-3p, miR-34b-5p, miR-3653-3p, miR-196a-3p, miR-210-5p, miR-618, miR-125b, miR-92a-1-5p, miR-7859, miR-23b-3p, miR-23c, miR-148b-3p, miR-200b, miR-199a-3p, miR-1247-5p, miR-532-3p, miR-548e-3p, miR-3600, miR-30d-3p, miR-34a-5p, miR-2300b-3p, miR-1434-5p, miR-217-5p, miR-224-5p, miR-338-3p, miR-3184-3p, miR-1271, miR-665-5p, novel\_74, miR-450b-3p, miR-6516-3p, miR-17-3p, miR-487b-5p, miR-129-5p, miR-454-3p, let-7b-3p, miR-30e-3p, miR-30a-3p, miR-665, miR-376a-3p, miR-582-5p, miR-301a-3p, miR-499b, miR-221-5p, miR-330-3p, miR-664-3p, miR-654-3p, miR-6240, miR-16-1-3p, miR-664-5p, miR-16-1-3p, miR-1197-5p, miR-431-3p, miR-376a-5p, miR-223-3p, miR-1434-3p, novel\_121, miR-500-5p, miR-330-3p, miR-2285ad, miR-3969, miR-3604, miR-144, miR-2285y, miR-34c-3p, miR-1285-5p, miR-362-5p, miR-500b-5p, miR-3074-5p, miR-3059-5p, novel\_48, miR-362-5p, miR-144-3p, miR-331-5p, miR-3074-5p, miR-664b, miR-221-5p

ERAP2

ENSOARGO(endoplasmic reticulum protein)

FBXO3

ENSOARGO(F-box protein)



miR-214-3p, miR-146b, miR-491-5p, miR-323b-3p, miR-505, miR-2957, miR-199a-3p, miR-2310, miR-378d, miR-101b-3p, miR-494-3p, miR-1388-3p, miR-378c, miR-323b, miR-378b, miR-6529a, miR-1185-3p, miR-421, miR-148b-5p, miR-199b-3p, miR-409b, miR-2300a-5p, miR-371a-5p, miR-2285y, miR-30b-5p, miR-2285n, miR-154a, miR-423-5p, novel\_94, miR-335-3p, miR-3963, miR-1185-2-3p, miR-4443, miR-3082-5p, miR-7857-3p, miR-378e, miR-378g, miR-10b, miR-21-3p, miR-185-3p, miR-422a, miR-216a-5p, miR-3601, novel\_17, miR-30b, miR-2411, miR-146a-5p, miR-130a-5p, miR-148a-5p, miR-133a-3p, miR-218-1-3p, miR-1197-5p, miR-140-3p, miR-5703, miR-378a-3p, miR-30c-5p, novel\_133, miR-378i, novel\_83, miR-199a-3p, miR-200b, miR-212-5p, miR-3600, miR-18a-3p, miR-130b-5p, miR-450b-3p, miR-324-3p, miR-6134, miR-3184-5p, miR-214, miR-4510, miR-433-5p, miR-378c, miR-543-3p, miR-625-5p, miR-30f, miR-345-5p, miR-433-3p, miR-30d-5p, miR-129b-3p, miR-450a-1-3p, miR-6130, miR-3065-3p, miR-2331-3p, miR-378a-3p, miR-2285v, miR-582, miR-146a, miR-345-5p, miR-503-3p, miR-628-5p, miR-363-5p, miR-130b-5p, miR-7862, miR-138, miR-29b, miR-450c-3p, miR-223-3p, miR-542-3p, miR-149-5p, miR-194-3p, miR-134-3p, miR-133b-5p, miR-199c, miR-147-5p, miR-22-5p, miR-29a, novel\_1, miR-4324, miR-2284w, miR-495-3p, novel\_101, miR-29c-3p, novel\_120, miR-135a-2-3p, miR-378f, miR-146b-5p, miR-18a-3p, miR-29a-3p, novel\_69, miR-655-5p, miR-200a-3p, novel\_96, novel\_127, miR-200c-3p, miR-2898, miR-200c, miR-205-5p, miR-1271-3p, miR-3065-3p, miR-200a, miR-200b-3p, miR-30c, miR-30a-5p, miR-29d-3p, novel\_121, miR-450a-1-3p, miR-2411-5p, miR-378h, miR-24-2-5p, miR-7641, miR-429-3p, miR-2285ad, miR-592, miR-767-5p, miR-138-5p, miR-3969, miR-34c-3p, miR-29b-3p, miR-378c, miR-485-5p, miR-1814c, miR-7144-5p, miR-23a-5p, miR-345-5p, miR-767, miR-10b-3p, miR-3154, miR-

miR-1306-5p, miR-1468, miR-2330-5p, miR-424-5p, miR-376b, miR-4791, miR-378b, miR-30b-3p, miR-299a-5p, miR-2426, miR-378c, miR-151a-3p, miR-222-5p, miR-5010-3p, miR-142-3p, miR-216a-3p, miR-9788-3p, novel\_60, miR-3059-5p, miR-452-5p, miR-194b-5p, miR-2285f, miR-129b-5p, novel\_94, miR-10b, miR-499b-5p, miR-378e, miR-196a-3p, miR-466i-5p, miR-2284m, miR-299-3p, miR-1277-5p, miR-105-3p, miR-183-5p, miR-29b-1-5p, miR-146a-5p, miR-2432, miR-1197-5p, miR-5703, miR-140-3p, miR-378d, miR-548e-3p, miR-485-3p, miR-3600, miR-340-5p, miR-15a-5p, miR-222-5p, miR-487a-3p, miR-199a-3p, miR-616-3p, miR-338-5p, miR-29b-2-5p, miR-6516-3p, miR-1843b-3p, miR-17-3p, miR-208b-5p, miR-487a-5p, miR-424-5p, miR-145a-3p, miR-378c, miR-3074-2-3p, miR-2330-3p, miR-206-3p, miR-6134, miR-154b-3p, miR-30f, miR-133b-3p, miR-582-5p, miR-660-5p, miR-378a-3p, miR-182-5p, miR-323-5p, miR-155-5p, miR-204-3p, miR-455-5p, miR-660, miR-539-3p, miR-296-3p, miR-653, miR-194-5p, miR-145a-5p, miR-138, miR-29b, miR-30b-3p, miR-2284ab, miR-455-5p, miR-133b-5p, miR-377-5p, miR-665, miR-6402, miR-15a, miR-16a, miR-203b-5p, novel\_120, miR-17-3p, novel\_101, miR-3959-3p, miR-211, miR-2285ab, miR-195a-5p, miR-376a-2-5p, miR-6516-3p, miR-7975, miR-378b, miR-670-3p, miR-29a-3p, miR-2404, miR-323a-5p, miR-17-3p, miR-543-5p, miR-1, miR-29b-2-5p, miR-30a-3p, miR-490-3p, miR-1957a, miR-134, miR-345-3p, miR-29d-3p, miR-411-3p, miR-7641, miR-378h, miR-483-3p, miR-2332, miR-5100, miR-410-5p, miR-29b-3p, miR-3969, miR-767-5p, miR-138-5p, miR-204-5p, miR-1306-5p, miR-133a-3p, miR-3607-3p, miR-378c, miR-2448-3p, miR-3154, miR-10b-3p, miR-1814c, miR-671-5p, miR-7144-5p, miR-23a-5p, miR-487a-3p, miR-365a-3p, miR-324-5p, miR-199a-3p, miR-182-5p, miR-16b, miR-29b-1-5p, miR-153-3p, miR-146b, miR-1388-3p, miR-378d, miR-2310, miR-301b-5p, miR-1a-3p, miR-145b, miR-539-5p, miR-153, miR-1185-3p, miR-3596, miR-378g, miR-411b-3p, miR-34b, miR-299b-3p, miR-29a-3p, miR-1185-2-3p, miR-500-3p, miR-3064-5p, miR-1291, miR-2285k, miR-361-3p, miR-148a-3p, miR-3141, miR-2387, miR-361-3p, miR-326-3p, miR-502-3p, miR-449a, miR-2428, miR-3059-5p, miR-1193, miR-29c-3p, miR-29a, miR-34c, miR-134-3p, miR-185-5p, miR-1298-3p, miR-216a-3p, miR-194-3p, miR-1185-3p, miR-421, miR-31-5p, miR-2300a-5p, miR-5010-3p, miR-138, miR-29b, miR-4508, miR-744-5p, miR-3120-5p, miR-296-5p, miR-1285, miR-501-3p, miR-30c-1-3p, miR-8485, miR-124a, miR-668-3p, let-7f-2-3p, miR-744-3p, let-7f-2-3p, miR-3085-3p, miR-326, miR-5126, miR-3141, miR-27a-5p, miR-34c-5p, miR-133c, miR-30c-1-3p, miR-545-3p, miR-3065-3p, miR-370-5p, miR-615-5p, miR-21a-3p, miR-500a-3p, miR-138-5p, miR-4492, miR-500, miR-134-5p, miR-29b-3p, miR-370-5p, miR-29b-2-5p, miR-148b-3p, miR-134-5p, miR-299a-3p, miR-3960, miR-6517, miR-34a-5p, novel\_133, miR-134, miR-124-3p, miR-29d-3p, miR-501-3p, miR-330-5p, miR-23b-5p, miR-2285i, miR-664b-3p, miR-3065-3p, miR-143-3p, miR-3064-5p, miR-29b-2-5p, miR-4286, miR-760-3p, miR-34b-5p, miR-299-3p, miR-543-5p, miR-152-3p, miR-30c-2-3p, miR-3071-3p, miR-185-3p

miR-10b, miR-452-3p, miR-2284g, miR-664b, miR-454-5p, miR-203-3p, miR-499a-3p, miR-129b-5p, miR-221, miR-361-3p, miR-335-3p, miR-452-5p, miR-194b-5p, miR-2284j, miR-9-5p, miR-181d-5p, miR-301a-5p, miR-382-3p, miR-154-3p, miR-2284q, miR-3964, miR-335, miR-499a-5p, novel\_78, miR-411b-5p, miR-455-3p, miR-221-3p, miR-153, miR-301b-5p, miR-10b, miR-16-2-3p, miR-299a-5p, miR-2426, miR-101a-5p, miR-2284b, miR-652-5p, miR-382-3p, miR-494-3p, miR-106a-5p, miR-106b-5p, miR-199a-3p, miR-153-3p, miR-130b-3p, miR-491-5p, miR-552-3p, miR-154a-3p, miR-2331-3p, miR-155-5p, miR-877-5p, miR-10a, miR-301a-3p, miR-499b-3p, miR-377-3p, miR-129b-3p, novel\_99, miR-1827, miR-543-3p, miR-154b-3p, miR-3074-2-3p, miR-3074-5p, miR-539-5p, miR-181c-5p, miR-122-5p, miR-10b-5p, miR-665, miR-222-3p, miR-2285j, miR-874-5p, miR-454-3p, miR-664a, miR-155-5p, miR-212-5p, miR-485-3p, miR-106a, miR-199a-3p, miR-200b, miR-487a-3p, miR-1197-5p, miR-1434-5p, miR-5703, miR-376a-5p, miR-193b-5p, miR-2284u, miR-19b-3p, novel\_73, miR-20a, miR-487a, miR-216c-5p, miR-380-3p, miR-2432, miR-376a-5p, miR-412-5p, miR-26a-5p, miR-196a-3p, miR-21-3p, miR-106a, miR-2284m, miR-26b-5p, miR-10a-5p, miR-320b, miR-378b, miR-3074-5p, miR-6535, miR-6516-3p, miR-19a-3p, miR-107, miR-335-5p, miR-301b-3p, novel\_27, novel\_87, miR-485-3p, miR-6402, miR-20a-5p, miR-4324, miR-412-5p, miR-6119-3p, miR-130a-3p, miR-665, miR-103a-3p, miR-103, miR-20b, novel\_116, miR-2284d, miR-194-5p, miR-181a-5p, miR-1434-3p, miR-7862, miR-2284x, miR-138, miR-2284ab, miR-380-3p, miR-101-5p, miR-194a, miR-17-5p, miR-106a-5p, miR-377-3p, miR-483-3p, miR-574-5p, miR-487a-3p, miR-2284n, miR-17-5p, miR-93-5p, miR-1248, miR-20b-5p, miR-3607-3p, miR-6128, miR-2284v, miR-145-3p, miR-93, miR-26c, miR-135a-1-3p, miR-2284k, miR-502, miR-138-5p, miR-129-3p, miR-222, miR-

miR-20b, miR-544b, miR-411-5p, miR-194-3p, miR-3431, miR-374b-3p, miR-194-5p, miR-145a-5p, miR-450c-3p, miR-7b-5p, miR-1434-3p, miR-2284x, miR-497-5p, miR-16-1-3p, miR-16b, miR-6240, miR-194a, miR-17-5p, miR-106a-5p, miR-2411-3p, miR-330-3p, miR-377-3p, miR-7-5p, miR-224-5p, miR-466f-3p, miR-3120-3p, miR-378b, miR-670-3p, miR-34b, miR-376b-3p, miR-3591-3p, miR-150-5p, miR-195a-5p, miR-19a-3p, miR-342-3p, miR-301b-3p, miR-449a, miR-211, novel\_87, miR-34c, miR-16a, miR-6402, miR-20a-5p, miR-15a, miR-199c, miR-22-5p, miR-450a-1-3p, miR-6516-5p, miR-758-5p, miR-322-5p, miR-1290, miR-345-3p, miR-300, miR-29b-2-5p, miR-30a-3p, miR-3529-3p, miR-450c-5p, miR-29a-5p, miR-3065-3p, miR-30c-2-3p, miR-664-3p, miR-205-5p, miR-2285af, miR-574-5p, miR-34c-5p, miR-300-3p, miR-17-5p, miR-93-5p, miR-381-3p, miR-1814c, miR-20b-5p, miR-7144-5p, miR-3074-1-3p, miR-16-5p, miR-3607-3p, miR-323-3p, miR-93, novel\_63, miR-204-5p, miR-31-3p, miR-145b, miR-199b-3p, miR-330-3p, miR-2459, miR-421, miR-216a-3p, miR-142-3p, miR-2284r, miR-544a, let-7c-3p, miR-424-5p, miR-106a-5p, miR-2310, miR-8485, miR-30c-1-3p, miR-106b-5p, miR-16b, miR-342, miR-214-3p, miR-130b-3p, miR-211-5p, miR-2285u, miR-664b, miR-194b-5p, miR-371a-5p, miR-382-3p, miR-450a-5p, miR-30d-3p, miR-505-3p, miR-106a, miR-2284h-5p, miR-532-3p, miR-15a-5p, miR-2366, miR-34a-5p, miR-16-1-3p, miR-133a-3p, miR-19b-3p, miR-142-3p, miR-195a-3p, miR-20a, miR-216c-5p, miR-2432, miR-142a-3p, miR-345-3p, miR-92a-1-5p, miR-500a-5p, miR-374a-5p, miR-21-3p, miR-34b-5p, miR-3653-3p, miR-106a, miR-296-3p, miR-21-3p, miR-3065-3p, miR-216b-3p, miR-140-5p, miR-2331-3p, miR-30c-1-3p, miR-15b-5p, miR-216b-5p, miR-544-3p, miR-377-3p, miR-582-5p, miR-301a-3p, miR-6516, miR-129b-3p, miR-450a-1-3p, miR-21a-3p, miR-186-5p, miR-582-5p, miR-542-3p, let-7c-3p, miR-214, miR-328-3p, miR-224-

ACSL4

ENSOARGO(acyl-CoA

miR-429-3p, miR-1224-5p, miR-505-5p, miR-322-5p, miR-2411-5p, miR-129-1-3p, miR-214-5p, miR-330-5p, miR-501-3p, miR-885-3p, miR-155-5p, miR-200b-3p, miR-128-3p, miR-29b-2-5p, miR-3064-5p, miR-4286, miR-28b, miR-3065-3p, miR-1271-3p, miR-3956-5p, miR-200c, miR-125a-3p, miR-217, miR-450a-2-3p, miR-2898, miR-200c-3p, miR-543-5p, novel\_127, novel\_96, miR-200a-3p, miR-3957-5p, miR-874-3p, miR-370-3p, miR-615-5p, miR-141-3p, miR-3957, miR-331-5p, miR-320a, miR-3154, miR-10b-3p, miR-345-5p, miR-7144-5p, miR-485-5p, miR-671-5p, novel\_42, miR-181a-2-3p, miR-2284v, miR-16-5p, miR-1197-3p, miR-551b-3p, miR-2284k, miR-370-5p, miR-135a-1-3p, miR-331-3p, miR-100-3p, miR-331-5p, miR-126b-3p, miR-204-5p, miR-28-5p, miR-3955-5p, miR-133b-5p, miR-377-5p, miR-432-5p, miR-2284d, miR-3431, miR-503-5p, novel\_116, miR-432, miR-873a-5p, miR-542-3p, miR-22-3p, miR-30b-3p, miR-16b, miR-497-5p, miR-2284x, miR-6240, miR-668-3p, miR-628-5p, miR-2285r, miR-345-5p, miR-503-5p, miR-3141, miR-330-3p, miR-197-5p, novel\_51, miR-378a-5p, novel\_69, miR-320c, miR-6535, miR-3141, miR-1306, miR-3970, miR-150-5p, miR-18a-3p, miR-3591-3p, miR-216a-3p, miR-6395, miR-195a-5p, miR-135a-2-3p, novel\_101, miR-495-3p, miR-1193, miR-211, miR-326-3p, miR-2428, miR-15a, miR-28c, miR-6402, miR-576-3p, miR-16a, miR-128-1-5p, miR-18a-3p, miR-210-3p, miR-15a-5p, miR-200b, miR-151-5p, miR-1247-5p, miR-328-3p, novel\_133, miR-2300b-3p, miR-5703, miR-1197-5p, miR-217-5p, miR-4429, miR-33b-3p, miR-378d, miR-503-5p, miR-2887, miR-29b-1-5p, miR-377-5p, miR-2424, miR-2411, miR-143-3p, miR-210-5p, miR-324-3p, miR-92a-1-5p, miR-320d, miR-2284m, miR-221-5p, miR-2331-3p, miR-140-5p, miR-221-5p, miR-3065-3p, miR-216b-3p, miR-370-5p, miR-21-3p, miR-296-3p, miR-552-3p, miR-2284s, miR-6130, miR-22-3p, miR-155-5p, miR-151b, miR-15b-5p, miR-199b-3p, miR-245-5p, miR-625-5p, miR-885-3p, miR-3964, miR-31-3p, miR-625-3p, miR-2484, miR-206, miR-371a-5p, novel\_82, miR-210-5p, miR-6525, miR-206-3p, miR-668-3p, miR-2447, miR-204-3p, miR-669, miR-300-3p, miR-1298-3p, miR-2285aa, miR-665, miR-222-5p, miR-31-5p, novel\_4 miR-433-5p, miR-3184-3p, miR-3074-2-3p, miR-206-3p, miR-410-5p, miR-409-3p, miR-487a-5p, miR-30c-1-3p, miR-487a-3p, miR-154a-3p, miR-34c-5p, miR-22-3p, miR-199a-5p, miR-204-3p, miR-2284n, miR-154b-3p, miR-543-3p, miR-216c-5p, miR-487a, miR-3529-3p, miR-2403, miR-181a-2-3p, miR-421-5p, miR-29b-1-5p, miR-199a-5p, miR-490-3p, miR-210-5p, miR-30c-2-3p, miR-92a-1-5p, miR-2284m, miR-2898, miR-34b-5p, miR-2285ad, miR-487a-3p, miR-758-5p, miR-2284z, miR-1343-5p, miR-140-3p, miR-1193, miR-493-3p, miR-582-3p, miR-218-1-3p, miR-34a-5p, miR-2447, miR-495-3p, miR-449a, miR-154a, miR-199b-5p, novel\_82, miR-2440, miR-2285y, miR-34c, miR-206, novel\_1, miR-656-5p, miR-154-3p, miR-452-3p, miR-34b, miR-199b-5p, miR-150-5p, miR-3065-5p, miR-335-3p, miR-1388-3p, miR-6240, miR-376b, miR-30c-1-3p, miR-432-3p, miR-432-3p, miR-296-3p, let-7 j, miR-296-3p, novel\_103, miR-330-3p, miR-29b-1-5p, miR-124-5p, miR-3955-3p, miR-199b-5p, miR-1343-5p, miR-1343-3p, miR-330-3p, miR-425-3p, miR-432-5p, miR-412-5p, miR-708-3p, miR-432, miR-873a-5p, miR-1434-3p, miR-1843b-5p, miR-22-3p, miR-2426, miR-2284aa

miR-378d, miR-30c-1-3p, miR-4532, miR-127-3p, miR-1839-3p, miR-23a-3p, miR-25-5p, miR-491-5p, miR-3085-3p, miR-326, miR-1306-5p, miR-2459, miR-216a-3p, miR-455-3p, miR-105-1, novel\_4, miR-2300a-5p, miR-1343-3p, miR-2426, miR-544a, miR-1388-5p, miR-378c, miR-541, miR-301b-5p, miR-2284r, miR-378b, miR-296-5p, miR-484, novel\_111, miR-877-3p, miR-361-3p, miR-423-5p, miR-3956-3p, miR-541-3p, miR-2447, novel\_60, miR-181d-5p, miR-1296-5p, miR-2440, miR-301a-5p, miR-378e, miR-378g, miR-3596, miR-4792, miR-3064-5p, miR-504, miR-361-3p, miR-376a-5p, miR-486-3p, miR-760-3p, miR-21-3p, miR-299-3p, miR-221-5p, miR-34b-5p, miR-422a, miR-125b, miR-324-3p, miR-23c, miR-23b-3p, miR-328-3p, miR-532-3p, miR-3600, miR-142-3p, miR-34a-5p, miR-378d, miR-215-5p, miR-193b-5p, miR-378i, novel\_133, miR-5703, miR-1197-5p, miR-378a-3p, miR-188-3p, miR-2904, miR-6525, miR-6134, miR-181c-5p, miR-3184-5p, miR-145a-3p, miR-3074-5p, miR-378c, miR-3958-5p, miR-155-5p, miR-664a, miR-708-5p, miR-4492, miR-320e, miR-665, miR-324-3p, miR-192-5p, miR-544-3p, miR-155-5p, miR-204-3p, novel\_32, miR-22-3p, miR-2331-3p, miR-30c-1-3p, miR-221-5p, miR-378a-3p, miR-504-5p, miR-552-3p, miR-3065-3p, miR-345-5p, miR-339b, miR-1827, miR-129b-3p, miR-345-5p, miR-628-5p, miR-363-5p, miR-378a-5p, miR-483-3p, miR-125a-5p, miR-1343-5p, miR-455-5p, miR-105-5p, miR-3141, miR-2285v, miR-134-3p, miR-544b, miR-149-5p, miR-133b-5p, miR-339-5p, miR-1260b, miR-138, miR-6239, miR-7862, miR-455-5p, miR-26a-2-3p, miR-1285, miR-542-3p, miR-181a-5p, miR-223-3p, miR-22-3p, miR-326-3p, miR-449a, novel\_101, miR-3957-3p, miR-1839-3p, miR-6119-3p, miR-203b-5p, miR-28c, miR-576-3p, miR-6529b, miR-34c, miR-299b-3p, novel\_69, miR-34b, miR-2404, miR-669, miR-3074-5p, miR-320b, miR-450b-3p, miR-410-5p, miR-1991, miR-135b-5p, miR-6305, miR-378f, miR-9851-3p, miR-

miR-34b-3p, miR-3591-5p, miR-330-5p, miR-30a-5p, miR-10b-2, miR-155-5p, miR-200b-3p, miR-2285ad, miR-299a-3p, miR-429-3p, miR-6517, miR-1224-5p, novel\_79, miR-7641, miR-24-2-5p, miR-758-5p, miR-6516-5p, miR-2284z, novel\_121, miR-2285af, miR-664-3p, miR-200c, miR-30c-2-3p, miR-339a, miR-450a-2-3p, miR-17-3p, miR-200c-3p, miR-127-5p, miR-6536, miR-92a-3p, novel\_96, miR-200a-3p, miR-3529-3p, miR-30a-3p, miR-3064-5p, miR-2478, miR-380-5p, miR-92b-3p, novel\_39, miR-29a-5p, miR-3065-3p, miR-450c-5p, miR-1271-3p, miR-2285b, miR-30e-5p, miR-503-3p, miR-301, miR-2448-3p, miR-3154, miR-376c-5p, miR-320a, miR-345-5p, miR-376c-5p, miR-3074-1-3p, miR-485-5p, miR-1248, miR-3068-3p, miR-141-3p, miR-25-3p, miR-376c-3p, miR-6740-5p, miR-3969, miR-3607-3p, miR-6128, miR-103b, miR-323-3p, miR-181c-3p, miR-653, miR-1285, miR-223-3p, miR-7b-5p, miR-1434-3p, miR-194-5p, miR-16-1-3p, miR-TBC1D23 ENSOARGO(TBC1 dom: 2284x, miR-27b-3p, miR-340-3p, miR-31-5p, miR-122-3p, miR-339-5p, miR-2285g, miR-134-3p, miR-185-5p, miR-6238, miR-194-3p, miR-544b, miR-7-5p, miR-330-3p, miR-105-5p, miR-194a, novel\_51, miR-2411-3p, miR-136-3p, miR-380-5p, miR-130b-5p, miR-6240, miR-363-5p, let-7f-2-3p, let-7f-2-3p, miR-432-3p, miR-432-3p, miR-345-5p, miR-376b-5p, miR-2285ab, miR-378b, miR-3065-5p, miR-450b-3p, miR-2285k, miR-9851-3p, miR-6516-3p, miR-505-3p, novel\_68, miR-320b, miR-26b-5p, miR-323a-5p, miR-2404, miR-299b-3p, novel\_69, miR-320c, miR-6535, miR-142b, miR-576-3p, novel\_87, miR-92a-3p, novel\_1, miR-656-5p, miR-335-5p, miR-17-3p, miR-326-3p, miR-2428, miR-2366, miR-140-3p, miR-5703, miR-1434-5p, miR-33b-3p, miR-4429, miR-16-1-3p, miR-361-5p, miR-1b-3p, miR-505-3p, miR-30d-3p, miR-383-5p, miR-200b, miR-340-5p, novel\_83, miR-2284h-5p, miR-26a-5p, miR-324-3p, miR-345-3p, miR-92a-1-5p, miR-320d, miR-3653-3p, miR-2484, miR-299-3p, miR-2285i, miR-376c-3p, miR-

miR-1434-5p, miR-1197-5p, miR-124-3p, miR-142-3p, miR-361-5p, miR-34a-5p, miR-16-1-3p, miR-106a, miR-505-3p, miR-30d-3p, miR-212-5p, miR-148b-3p, miR-200b, miR-7859, novel\_83, miR-618, miR-26a-5p, miR-92a-1-5p, miR-324-3p, miR-219b-5p, miR-466i-5p, miR-106a, miR-2284m, miR-1277-5p, miR-34b-5p, miR-30b-3p, miR-329a-5p, miR-20a, miR-376c-3p, miR-125b-2-3p, miR-181b-1-3p, miR-130a-5p, miR-421-5p, miR-2411, miR-21a-3p, miR-433-3p, miR-129b-3p, miR-27b-5p, miR-543-3p, miR-548o-3p, miR-660-5p, miR-140-5p, miR-545-3p, miR-2331-3p, miR-182-5p, miR-552-3p, miR-193b-3p, miR-544-3p, miR-377-3p, novel\_25, miR-204-3p, miR-30e-3p, miR-2285j, miR-151-3p, miR-30a-3p, miR-487b-5p, novel\_74, miR-3074-5p, miR-145a-3p, miR-338-3p, miR-6134, miR-181c-5p, miR-4791, miR-6529a, miR-544a, miR-3120-5p, miR-21b, miR-1343-3p, miR-151a-3p, miR-222-5p, miR-181b-2-3p, miR-1185-3p, miR-455-3p, miR-326, miR-342, miR-182-5p, miR-106b-5p, miR-3955-3p, miR-103a-2-5p, miR-199b-5p, miR-106a-5p, miR-382-3p, miR-124a, miR-8485, miR-3187-3p, miR-199b-5p, miR-361-3p, miR-140-5p, miR-129b-5p, miR-136-5p, miR-20a-3p, miR-499b-5p, miR-3082-5p, miR-2483-3p, miR-1185-2-3p, miR-203-3p, miR-107-5p, miR-335, miR-2285t, miR-885-5p, miR-2447, miR-3059-5p, miR-219a-5p, miR-452-5p, miR-181d-5p, miR-1285-5p, miR-1290, miR-134, miR-330-5p, miR-23b-5p, miR-218-2-3p, miR-200b-3p, miR-429-3p, miR-1224-5p, miR-2411-5p, novel\_121, miR-134-5p, miR-582-3p, miR-200c, miR-181b-5p, miR-200c-3p, miR-6536, miR-152-3p, miR-3529-3p, miR-181a-2-3p, miR-2385-3p, miR-30a-3p, miR-28b, miR-380-5p, miR-490-3p, miR-192-3p, miR-29a-5p, miR-199a-5p, miR-376c-5p, miR-376b-5p, miR-2448-3p, miR-301, miR-503-3p, miR-488-3p, miR-376c-5p, miR-17-5p, miR-93-5p, miR-329b, miR-1248, miR-3074-1-3p, miR-376c-5p, miR-20b-5p, miR-874-3p, miR-3068-3p, miR-2285aa, miR-374c-3p, miR-34c-5p, miR-2284n, miR-376c-3p, miR-



miR-369-3p, miR-487a, miR-503-5p, miR-216c-5p, miR-2411, miR-146a-5p, miR-142a-3p, miR-130a-5p, miR-664b-3p, miR-29b-1-5p, miR-125b, miR-345-3p, novel\_17, miR-2285p, miR-26a-5p, miR-196a-3p, miR-3653-3p, miR-34b-5p, miR-505-3p, miR-212-5p, miR-3600, miR-328-3p, miR-199a-3p, miR-15a-5p, miR-210-3p, miR-1197-5p, miR-5703, miR-124-3p, miR-2904, miR-1246, miR-2284u, miR-34a-5p, miR-664-5p, miR-218-1-3p, miR-16-1-3p, miR-19b-3p, miR-3074-2-3p, miR-122-5p, miR-29b-2-5p, miR-219b-3p, miR-324-3p, miR-19b-1-5p, miR-2285j, miR-130b-5p, miR-424-5p, miR-208b-5p, miR-454-3p, miR-155-5p, miR-552-3p, miR-154a-3p, miR-21-3p, miR-216b-3p, miR-660-5p, miR-2331-3p, miR-30c-1-3p, miR-155-5p, miR-15b-5p, novel\_25, miR-139-5p, miR-193b-3p, miR-544-3p, miR-301a-3p, miR-582-5p, miR-487b-5p, miR-411, miR-433-3p, miR-129b-3p, miR-2285c, miR-582-5p, novel\_99, miR-625-5p, miR-154b-3p, miR-2284b, miR-101b-3p, miR-1839-3p, miR-494-3p, miR-424-5p, miR-124a, miR-3187-3p, miR-8485, miR-193a, miR-30c-1-3p, miR-16b, miR-29b-1-5p, miR-199a-3p, miR-146b, miR-199b-5p, miR-153-3p, miR-130b-3p, miR-199b-3p, miR-105-1, miR-2285e, miR-216a-3p, miR-9788-3p, miR-142-3p, miR-153, miR-7857, miR-3120-5p, miR-544a, miR-452-5p, miR-885-5p, miR-7705, miR-154a, miR-219a-2-3p, miR-8095, miR-2285y, miR-2285n, miR-218-5p, miR-154-3p, miR-2284q, miR-541-5p, miR-2285u, miR-10b, miR-2319b, miR-139-5p, miR-664b, miR-2284g, miR-454-5p, miR-2483-3p, miR-129b-5p, miR-199b-5p, novel\_94, miR-544-5p, miR-668-5p, miR-4286, miR-2284f, miR-29b-2-5p, miR-3529-3p, miR-192-3p, miR-2284a, miR-2285b, miR-2284y, miR-199a-5p, miR-450b-5p, miR-30c-2-3p, miR-219-3p, miR-664-3p, miR-125a-3p, miR-2285af, miR-1a-2-5p, miR-1224-5p, miR-2285ad, novel\_121, miR-2284z, miR-758-5p, miR-2411-5p, miR-302a-5p, miR-322-5p, miR-1290, miR-345-3p, miR-105-2, miR-128-3p, miR-155-5p, miR-

miR-3064-5p, miR-29b-2-5p, miR-2403, miR-181a-2-3p, miR-380-5p, miR-450b-5p, novel\_39, miR-199a-5p, miR-1271-3p, miR-17-3p, miR-127-5p, novel\_96, miR-543-5p, novel\_127, miR-1224-5p, miR-2411-5p, miR-758-5p, miR-134-5p, miR-345-3p, miR-134, miR-885-3p, novel\_42, miR-134-5p, miR-486b-3p, miR-1271, miR-3956, miR-133c, miR-199a-5p, miR-2448-3p, miR-137-3p, miR-320a, miR-3154, miR-485-5p, miR-380-5p, miR-130b-5p, miR-363-5p, let-7f-2-3p, let-7f-2-3p, miR-432-3p, miR-432-3p, miR-3141, miR-2411-3p, miR-452-5p, miR-193a-3p, miR-134-3p, miR-30b-3p, miR-219a-1-3p, miR-4508, miR-744-5p, miR-7862, miR-193b-3p, novel\_101, miR-17-3p, miR-24-3p, miR-2428, miR-199b-5p, miR-576-3p, miR-320c, miR-669, miR-3141, miR-18a-3p, miR-1291, miR-9851-3p, miR-2887, miR-345-3p, miR-29b-1-5p, miR-2411, miR-486-3p, miR-143-3p, miR-324-3p, miR-185-3p, miR-345-3p, miR-320d, miR-760-3p, miR-18a-3p, miR-2300b-3p, miR-2366, miR-5703, miR-941, miR-4429, miR-378d, miR-145a-3p, miR-3184-5p, miR-132-5p, miR-29b-2-5p, miR-17-3p, miR-874-5p, miR-500, miR-130b-5p, miR-504-5p, miR-2331-3p, miR-2284s, miR-132-5p, miR-193b-3p, miR-500a-3p, miR-885-3p, miR-582-5p, miR-1827, miR-1388-3p, miR-2330-5p, miR-4532, miR-8485, miR-320b, miR-29b-1-5p, miR-3085-3p, miR-491-5p, miR-199b-5p, novel\_78, miR-425-3p, miR-455-3p, miR-9788-3p, miR-1185-3p, miR-2284r, miR-484, miR-296-5p, miR-541, miR-30b-3p, miR-21b, miR-101c, miR-541-3p, miR-6527, miR-452-5p, miR-9-3p, miR-423-5p, novel\_82, miR-3064-5p, miR-7977, miR-378g, miR-1185-2-3p, miR-361-3p, miR-199b-5p, miR-504, miR-9-3p

miR-376a-3p, miR-376d, miR-4443, miR-7857-3p, miR-2483-3p, miR-664b, miR-2319b, miR-452-3p, miR-2285t, miR-628-3p, miR-2285n, miR-101-3p, miR-219a-2-3p, miR-181d-5p, miR-194b-5p, miR-2284j, miR-452-5p, miR-3059-5p, miR-1839-5p, miR-2284aa, miR-16-2-3p, miR-1388-5p, miR-450b-5p, miR-10b, miR-9788-3p, miR-2459, miR-539-5p, miR-376b-3p, miR-147a, miR-181b-2-3p, miR-1343-3p, miR-130b-3p, miR-3955-3p, miR-182-5p, miR-106b-5p, miR-8485, miR-2310, miR-124a, miR-1388-3p, miR-382-3p, miR-106a-5p, miR-494-3p, miR-339b, miR-433-3p, let-7f-1-3p, miR-301a-3p, miR-10a, miR-6516, miR-656-3p, miR-216b-5p, miR-182-5p, miR-496-3p, miR-454-3p, miR-669a-3p, miR-30a-3p, miR-219b-3p, miR-29b-2-5p, miR-338-5p, let-7b-3p, miR-2285j, miR-30e-3p, miR-6134, miR-181c-5p, miR-10b-5p, miR-6525, miR-98-3p, miR-2330-3p, miR-665-5p, miR-3074-2-3p, miR-539-5p, miR-145a-3p, miR-3074-5p, let-7a-3p, miR-19b-3p, miR-124-3p, miR-98-3p, miR-1193, miR-2300b-3p, miR-2284h-5p, miR-383-5p, miR-7859, miR-222-5p, miR-340-5p, miR-148b-3p, miR-380-5p, miR-106a, miR-30b-3p, miR-21-3p, miR-106a, miR-2284m, miR-466i-5p, miR-196a-3p, novel\_17, miR-664b-3p, miR-421-5p, miR-181b-1-3p, miR-20a, miR-2285w, miR-135b-5p, miR-107, miR-19a-3p, miR-3065-5p, miR-376b-3p, miR-21c, miR-216a-3p, miR-148a-3p, miR-669, miR-677, miR-181b-3p, miR-2404, miR-670-3p, miR-10a-5p, miR-3120-3p, miR-3074-5p, miR-329-5p, miR-421-5p, miR-147-5p, miR-382-5p, miR-20a-5p, miR-133a-5p, novel\_27, miR-301b-3p, miR-3959-3p, miR-758-5p, miR-1a-1-5p, miR-2284x, miR-21-5p, miR-380-3p, miR-2284ab, miR-197-3p, miR-3071-5p, novel\_23, miR-194-5p, miR-374b-3p, miR-181a-5p, miR-1434-3p, miR-20b, miR-103, miR-130a-3p, miR-339-5p, miR-31-5p, miR-103a-3p, miR-466f-3p, miR-483-3p, miR-197-5p, miR-194a, miR-106a-5p, novel\_51, miR-17-5p, miR-296-3p, miR-296-3p, miR-2284l, miR-282, miR-20b-5p, miR-190a-3p, miR-664a, miR-6123, miR-20a-5p, miR-1197-3p, miR-2903, miR-93, miR-212-3p, miR-4510, miR-342-3p, miR-665-5p, miR-193b-3p, miR-193a-5p, miR-6527, miR-485-5p, miR-20b-5p, miR-7144-5p, miR-409-5p, miR-17-5p, miR-3065-5p, miR-93-5p, miR-193b-3p, miR-6130, miR-377-3p, miR-2355-5p, miR-106a, miR-2484, miR-193a-3p, miR-377-3p, miR-342, miR-106b-5p, miR-185-3p, miR-17-5p, miR-106a-5p, miR-8485, miR-2432, miR-106a-5p, miR-20a, miR-2284x, miR-24-2-5p, miR-505-5p, miR-20b, miR-106a, miR-1b-3p

CHIC1 ENSOARGO(cysteine) 3p, miR-140-5p, miR-301b-5p, miR-143-5p, miR-301a-5p, miR-409b, novel\_121, miR-421, miR-544b, miR-532-3p, miR-216a-3p, miR-7859, miR-188-3p, miR-2427, miR-22-3p, miR-708-3p, miR-188-5p, miR-544a, miR-4429, miR-219a-1-3p, miR-1260b, miR-4286, miR-744-3p, miR-628-5p, miR-216c-5p, let-7j, miR-664b-3p, miR-450b-5p, miR-30f, miR-320b, miR-1260a, miR-466f-3p, miR-320d, miR-211-5p, miR-7-1-3p, miR-545-3p, miR-140-5p, miR-22-3p, miR-320c, miR-544-3p, miR-3065-5p, miR-320a, miR-140-5p, miR-21a-3p, miR-488-3p, miR-186-5p, miR-543-3p, miR-1285-5p, miR-323c, miR-1260b, miR-211, novel\_87, miR-2332, miR-147-5p, miR-204-5p, miR-208b-5p

TRIM4 ENSOARGO(triparti) 3p, miR-140-5p, miR-301b-5p, miR-143-5p, miR-301a-5p, miR-409b, novel\_121, miR-421, miR-544b, miR-532-3p, miR-216a-3p, miR-7859, miR-188-3p, miR-2427, miR-22-3p, miR-708-3p, miR-188-5p, miR-544a, miR-4429, miR-219a-1-3p, miR-1260b, miR-4286, miR-744-3p, miR-628-5p, miR-216c-5p, let-7j, miR-664b-3p, miR-450b-5p, miR-30f, miR-320b, miR-1260a, miR-466f-3p, miR-320d, miR-211-5p, miR-7-1-3p, miR-545-3p, miR-140-5p, miR-22-3p, miR-320c, miR-544-3p, miR-3065-5p, miR-320a, miR-140-5p, miR-21a-3p, miR-488-3p, miR-186-5p, miR-543-3p, miR-1285-5p, miR-323c, miR-1260b, miR-211, novel\_87, miR-2332, miR-147-5p, miR-204-5p, miR-208b-5p

SLC24A1 ENSOARGO(solute c) 3p, miR-140-5p, miR-301b-5p, miR-143-5p, miR-301a-5p, miR-409b, novel\_121, miR-421, miR-544b, miR-532-3p, miR-216a-3p, miR-7859, miR-188-3p, miR-2427, miR-22-3p, miR-708-3p, miR-188-5p, miR-544a, miR-4429, miR-219a-1-3p, miR-1260b, miR-4286, miR-744-3p, miR-628-5p, miR-216c-5p, let-7j, miR-664b-3p, miR-450b-5p, miR-30f, miR-320b, miR-1260a, miR-466f-3p, miR-320d, miR-211-5p, miR-7-1-3p, miR-545-3p, miR-140-5p, miR-22-3p, miR-320c, miR-544-3p, miR-3065-5p, miR-320a, miR-140-5p, miR-21a-3p, miR-488-3p, miR-186-5p, miR-543-3p, miR-1285-5p, miR-323c, miR-1260b, miR-211, novel\_87, miR-2332, miR-147-5p, miR-204-5p, miR-208b-5p

TOMM70A ENSOARGO(transloc) 3p, miR-140-5p, miR-301b-5p, miR-143-5p, miR-301a-5p, miR-409b, novel\_121, miR-421, miR-544b, miR-532-3p, miR-216a-3p, miR-7859, miR-188-3p, miR-2427, miR-22-3p, miR-708-3p, miR-188-5p, miR-544a, miR-4429, miR-219a-1-3p, miR-1260b, miR-4286, miR-744-3p, miR-628-5p, miR-216c-5p, let-7j, miR-664b-3p, miR-450b-5p, miR-30f, miR-320b, miR-1260a, miR-466f-3p, miR-320d, miR-211-5p, miR-7-1-3p, miR-545-3p, miR-140-5p, miR-22-3p, miR-320c, miR-544-3p, miR-3065-5p, miR-320a, miR-140-5p, miR-21a-3p, miR-488-3p, miR-186-5p, miR-543-3p, miR-1285-5p, miR-323c, miR-1260b, miR-211, novel\_87, miR-2332, miR-147-5p, miR-204-5p, miR-208b-5p

miR-34c, miR-16a, miR-15a, miR-28c, miR-203b-5p, novel\_1, miR-29a, miR-29c-3p, miR-495-3p, miR-1193, miR-449a, miR-2285m, miR-211, miR-24-3p, miR-3591-3p, miR-3141, miR-148a-3p, miR-2387, miR-146b-5p, miR-135b-5p, miR-505-3p, miR-195a-5p, miR-450b-3p, miR-655-5p, miR-3120-3p, miR-3074-5p, miR-677, miR-6535, miR-181b-3p, miR-34b, miR-29a-3p, miR-3141, miR-99a-5p, miR-455-5p, miR-224-5p, miR-503-5p, miR-146a, miR-466f-3p, miR-124-5p, miR-363-5p, let-7f-2-3p, let-7f-2-3p, miR-22-3p, novel\_23, miR-19b-2-5p, miR-708-3p, miR-1285, miR-181a-5p, miR-542-3p, miR-497-5p, miR-455-5p, miR-2284x, miR-29b, miR-16b, miR-380-3p, miR-125b-1-3p, miR-487b-3p, miR-26b-3p, miR-340-3p, miR-3955-5p, miR-503-5p, miR-3431, miR-331-3p, miR-135a-5p, miR-29b-3p, miR-370-5p, miR-494-5p, miR-204-5p, miR-486b-3p, miR-16-5p, miR-193a-5p, miR-103b, novel\_42, miR-181c-3p, miR-10b-3p, miR-145-3p, miR-374a-3p, miR-1197-3p, miR-200a-5p, miR-100-5p, miR-301, miR-7144-5p, miR-10b-3p, miR-2474, miR-329b, miR-370-3p, miR-2355-5p, miR-141-3p, miR-1271, miR-487a-3p, miR-3068-3p, miR-34c-5p, miR-3965, miR-30c-2-3p, miR-181c-3p, miR-8117, miR-99a, miR-219-3p, novel\_96, miR-200a-3p, miR-152-3p, miR-2898, miR-181b-5p, miR-4286, miR-3065-3p, miR-200a, miR-490-3p, miR-28b, miR-7134-5p, miR-29d-3p, miR-99a-5p, miR-1224-5p, miR-7641, miR-2285ad, miR-582-3p, miR-214-5p, miR-322-5p, miR-758-5p, miR-371a-5p, miR-2285y, miR-2285n, miR-218-5p, miR-2440, miR-3964, miR-154-3p, miR-3968, miR-181d-5p, miR-452-5p, miR-2447, miR-212-3p, miR-219a-2-3p, miR-154a, miR-361-3p, miR-361-3p, miR-335-3p, miR-877-3p, miR-181a-3p, miR-99b-5p, miR-504, miR-668-5p, miR-211-5p, miR-7977, miR-2284g, miR-10b, miR-1185-2-3p, miR-499a-3p, miR-2957, miR-29b-1-5p, miR-16b, miR-146b, miR-2285o, miR-214-3p, miR-491-5p, miR-3955-3p, miR-652-5p, miR-124a, miR-124-5p, miR-382-

miR-1260a, miR-17-3p, miR-191-3p, miR-152-3p, miR-543-5p, miR-3064-5p, miR-181a-2-3p, novel\_39, miR-3065-3p, miR-490-3p, miR-1271-3p, miR-345-3p, miR-29d-3p, miR-23b-5p, miR-330-5p, miR-128-3p, miR-299a-3p, miR-6517, miR-24-2-5p, miR-322-5p, miR-378h, miR-129-1-3p, miR-2433, miR-29b-3p, miR-486b-3p, miR-1306-5p, miR-16-5p, miR-93, miR-1197-3p, miR-1260b, miR-365a-5p, miR-378c, miR-93-5p, miR-17-5p, miR-3154, miR-345-5p, miR-20b-5p, miR-485-5p, miR-1248, miR-574-5p, miR-2355-5p, miR-615-5p, miR-34c-5p, miR-154b-5p, miR-503-5p, miR-377-3p, miR-365b-5p, novel\_51, miR-2331-5p, miR-106a-5p, miR-17-5p, miR-2411-3p, miR-193a-3p, miR-130b-5p, miR-432-3p, miR-345-5p, miR-873a-5p, miR-1843b-5p, miR-1285, miR-29b, miR-16b, miR-381-5p, miR-1260b, miR-497-5p, miR-369-5p, miR-744-5p, miR-31-5p, miR-377-5p, miR-503-5p, miR-194-3p, miR-149-5p, miR-20b, miR-2355-3p, miR-502-5p, miR-15a, miR-20a-5p, miR-34c, miR-16a, miR-128-1-5p, miR-29a, miR-342-3p, miR-335-5p, miR-193b-3p, miR-17-3p, novel\_101, miR-29c-3p, miR-371b-3p, miR-1307-3p, miR-24-3p, miR-326-3p, miR-449a, miR-148a-3p, miR-3970, miR-1306, miR-150-5p, miR-216a-3p, miR-1291, miR-450b-3p, miR-410-5p, miR-2284e, miR-195a-5p, miR-505-3p, miR-378f, miR-378b, miR-320b, miR-29a-3p, miR-299b-3p, miR-34b, miR-324-3p, miR-345-3p, miR-422a, miR-106a, miR-760-3p, miR-34b-5p, miR-299-3p, miR-503-5p, miR-20a, miR-2887, miR-29b-1-5p, miR-377-5p, miR-2424, miR-486-3p, miR-378i, novel\_133, miR-1197-5p, miR-378a-3p, miR-941, miR-33b-3p, miR-218-1-3p, miR-133a-3p, miR-34a-5p, miR-378d, miR-148a-5p, miR-106a, miR-1b-3p, miR-505-3p, miR-15a-5p, miR-148b-3p, miR-671-3p, miR-532-3p, miR-132-5p, miR-369-5p, miR-665, miR-664a, miR-17-3p, miR-424-5p, miR-874-5p, miR-130b-5p, miR-378c, miR-145a-3p, miR-4510, miR-129-2-3p, miR-3958-5p, miR-214, miR-3184-5p, miR-338-3p, miR-21a-3p, miR-

miR-124a, miR-23a-3p, miR-378d, miR-1b-5p, miR-848b, miR-130b-3p, miR-214-3p, miR-153-3p, miR-1343-3p, miR-199b-3p, miR-1298-3p, miR-153, miR-411b-5p, miR-455-3p, miR-541, miR-329-3p, miR-1a-3p, miR-362-3p, miR-1839-5p, miR-101c, miR-885-5p, miR-2447, miR-877-3p, miR-361-3p, miR-423-5p, miR-2440, novel\_82, miR-499a-5p, miR-154-3p, miR-490-5p, miR-2319b, miR-378g, miR-3596, miR-4443, miR-409-5p, miR-378j, miR-3963, miR-1983, miR-544-5p, miR-487a, miR-329a-5p, miR-345-3p, miR-376a-5p, miR-143-3p, miR-486-3p, miR-2424, miR-2285p, miR-618, miR-422a, miR-23c, miR-7859, miR-23b-3p, miR-328-3p, miR-378i, miR-217-5p, miR-378a-3p, miR-142-3p, miR-184-3p, miR-493-3p, miR-34a-5p, miR-218-1-3p, miR-133a-3p, miR-3184-3p, miR-214, miR-181c-5p, miR-3184-5p, miR-3604, miR-454-3p, miR-4492, miR-1277-3p, miR-30c-1-3p, miR-216b-3p, miR-154a-3p, miR-301a-3p, miR-345-5p, miR-543-3p, miR-1895, let-7j, miR-7-5p, novel\_51, miR-378a-5p, miR-193a-3p, miR-106b-3p, miR-134-3p, miR-412-5p, miR-194-3p, miR-149-5p, miR-7b-5p, miR-335-5p, miR-193b-3p, miR-301b-3p, miR-412-5p, miR-206, miR-6123, miR-329-5p, novel\_68, novel\_69, miR-411b-3p, miR-320c, miR-669, miR-148a-3p, miR-216a-3p, miR-1306, miR-412-3p, miR-378f, miR-3064-5p, miR-450b-5p, miR-2285b, miR-125a-3p, miR-205-5p, miR-152-3p, miR-2285ad, miR-1224-5p, novel\_121, miR-1343-5p, novel\_42, miR-193a-5p, miR-1260b, miR-125b-5p, miR-100-3p, miR-592, miR-125a, miR-1271, miR-2355-5p, miR-2285aa, miR-300-3p, miR-301, miR-329a, miR-329b, miR-345-5p, miR-1248, miR-494-3p, miR-382-3p, miR-30c-1-3p, miR-1306-5p, miR-320b, miR-362-3p, miR-3085-3p, miR-2300a-5p, novel\_4, miR-409b, miR-222-5p, miR-5010-3p, miR-296-5p, miR-378b, miR-125b-2-3p, miR-30b-3p, miR-101a-5p, miR-450b-5p, miR-544a, miR-378c, miR-3120-5p, miR-541-3p, miR-181d-5p, miR-152-5p, miR-2285v, miR-325, miR-1726, novel\_39, miR-181c-5p, miR-3607-3p, miR-6128, miR-181d-5p, miR-2330-5p, miR-382-3p, miR-21-3p, miR-181b-5p, miR-324-3p, miR-2957, miR-30b-5p, miR-6402, novel\_17, miR-216b-5p, miR-1b-3p, miR-2285aa, miR-2285u, miR-885-3p, miR-9-3p, miR-885-3p, miR-30d-5p, novel\_23, miR-30a-5p, miR-125b-2-3p, miR-3154, miR-30e-5p, miR-3591-5p, miR-2366, miR-181a-5p

SNX5

ENSOARGO(sorting)

SH2B3

ENSOARGO(SH2B3)

miR-190a-5p, miR-424-5p, miR-450b-3p, miR-10b-5p, miR-3074-2-3p, miR-425-5p, miR-378c, miR-539-5p, miR-625-5p, miR-186-5p, novel\_99, miR-154b-3p, miR-345-5p, miR-339b, miR-129b-3p, miR-450a-1-3p, miR-204-3p, miR-15b-5p, miR-27a-5p, miR-10a, miR-154a-3p, miR-2331-3p, miR-378a-3p, miR-545-3p, miR-504-5p, miR-660-5p, miR-299-3p, miR-106a, miR-320d, miR-422a, miR-125b, miR-345-3p, miR-2285p, novel\_17, miR-146a-5p, miR-664b-3p, miR-377-5p, miR-20a, miR-216c-5p, miR-487a, miR-148a-5p, miR-4429, miR-378a-3p, miR-5703, miR-378i, miR-2366, miR-2300b-3p, miR-199a-3p, miR-383-5p, miR-340-5p, miR-222-5p, miR-15a-5p, miR-380-5p, miR-505-3p, miR-106a, miR-154-3p, miR-3968, miR-450a-5p, novel\_82, miR-190b-5p, miR-2447, miR-1983, miR-504, miR-381-3p, miR-140-5p, miR-378g, miR-378e, miR-20a-3p, miR-146b, miR-491-5p, miR-487b-5p, miR-323b-3p, miR-106b-5p, miR-16b, miR-320b, miR-199a-3p, miR-326, miR-378d, miR-33a-5p, miR-424-5p, miR-106a-5p, miR-378c, miR-412-3p, miR-125b-2-3p, miR-378b, miR-10b, miR-4791, miR-9788-3p, miR-126a-5p, novel\_4, miR-1343-3p, miR-330-3p, miR-125b-5p, miR-6740-5p, miR-3969, miR-29b-3p, miR-34c-3p, miR-2332, miR-378c, miR-93, miR-323-3p, miR-193a-5p, miR-16-5p, miR-376c-5p, miR-20b-5p, miR-345-5p, miR-329b, miR-93-5p, miR-376c-5p, miR-17-5p, miR-320a, miR-3154, miR-381-3p, miR-365a-3p, miR-125a, miR-574-5p, miR-487a-3p, miR-874-3p, miR-107, novel\_96, miR-2898, miR-127-5p, miR-339a, novel\_39, miR-2285b, miR-450c-5p, miR-10a-5p, miR-300, miR-2427, miR-29d-3p, miR-330-5p, miR-345-3p, miR-1290, miR-450a-1-3p, miR-582-3p, miR-322-5p, miR-758-5p, miR-378h, miR-1224-5p, novel\_79, miR-412, miR-299a-3p, miR-203b-5p, miR-421-5p, miR-29a, miR-16a, miR-15a, miR-133a-5p, miR-20a-5p, miR-576-3p, miR-326-3p, miR-24-3p, miR-758-5p, miR-29c-3p, miR-2319a, miR-146b-5p, miR-505-3p, miR-378f, miR-

miR-29b-1-5p, miR-323b-3p, miR-199a-3p, miR-320b, miR-2310, miR-8485, miR-378d, miR-376b, let-7c-3p, miR-494-3p, miR-1388-3p, miR-21b, miR-2284aa, miR-101c, miR-2426, miR-544a, miR-378c, miR-323b, miR-1298-5p, miR-378b, miR-148b-5p, miR-221-3p, miR-455-3p, miR-539-5p, miR-181b-2-3p, miR-222-5p, miR-145b, miR-27a-3p, miR-199b-3p, miR-1343-3p, miR-548w, miR-330-3p, miR-2284q, miR-335, miR-1973, novel\_82, miR-218-5p, miR-9-3p, miR-877-3p, miR-194b-5p, miR-452-5p, miR-181d-5p, miR-3956-3p, miR-2447, novel\_60, novel\_94, miR-9-3p, miR-493-5p, miR-668-5p, miR-504, miR-136-5p, miR-299b-5p, miR-221, miR-27a-3p, miR-2483-3p, miR-489, miR-499a-3p, miR-378e, miR-7977, miR-452-3p, miR-2319b, miR-24-1-5p, miR-139-5p, miR-30d, miR-466i-5p, miR-320d, miR-422a, miR-216a-5p, novel\_17, miR-2285p, miR-210-5p, miR-26a-5p, miR-618, miR-196a-3p, miR-143-3p, miR-181b-1-3p, miR-376c-3p, miR-130a-5p, miR-376a-5p, miR-29b-1-5p, miR-664b-3p, miR-2285w, miR-329a-5p, miR-148a-5p, miR-664-5p, miR-142-3p, miR-4429, miR-493-3p, miR-5703, miR-378a-3p, miR-140-3p, miR-2904, miR-2366, miR-376a-5p, miR-191, miR-378i, miR-328-3p, miR-199a-3p, miR-2284h-5p, miR-671-3p, miR-340-5p, miR-208b-5p, miR-487a-5p, miR-6516-3p, miR-17-3p, novel\_74, miR-3604, miR-665, miR-222-3p, miR-224-5p, miR-145a-3p, miR-378c, miR-186-5p, miR-543-3p, miR-345-5p, miR-411, miR-30d-5p, miR-598-3p, miR-129b-3p, miR-204-3p, miR-139-5p, miR-544-3p, miR-376e-3p, miR-499b-3p, miR-532-5p, miR-548o-3p, miR-2331-3p, miR-140-5p, miR-504-5p, miR-378a-3p, miR-194a, miR-330-3p, miR-224-5p, miR-345-5p, miR-363-5p, miR-493-5p, miR-6240, miR-27b-3p, miR-21-5p, novel\_23, miR-3071-5p, miR-145a-5p, miR-194-5p, miR-542-3p, miR-181a-5p, miR-1434-3p, miR-103, miR-544b, novel\_116, miR-3431, miR-103a-3p, miR-340-3p, miR-502b, miR-199c, miR-203b-5p, novel\_1, miR-379-3p, miR-670-3p, miR-29a-3p, miR-6516-3p, miR-376b-5p, miR-3065-5p, miR-2447, miR-29c-3p, miR-2285x, miR-181d-5p, miR-29a, miR-203b-5p, miR-142b, miR-539-5p, miR-3535, miR-9788-3p, miR-1343-3p, miR-29b, miR-1388-5p, miR-1839-5p, miR-181a-5p, miR-1434-3p, miR-4791, miR-653, miR-484, miR-125b-2-3p, miR-323b, miR-432-3p, miR-432-3p, miR-345-5p, miR-491-3p, miR-676-3p, miR-363-5p, miR-124-5p, miR-2411-3p, miR-323b-3p, miR-877-5p, miR-155-5p, miR-204-3p, miR-545-3p, miR-532-5p, miR-345-5p, miR-345-5p, miR-186-5p, miR-543-3p, miR-3154, miR-181c-5p, miR-155-5p, miR-6516-3p, miR-135a-1-3p, miR-29b-3p, miR-6740-5p, miR-758-5p, novel\_121, miR-545-5p, miR-155-5p, miR-345-3p, miR-5703, miR-29d-3p, miR-2427, miR-490-3p, novel\_39, miR-29a-5p, miR-127-5p, miR-181b-5p, miR-618, miR-345-3p, miR-497-5p, miR-16b, miR-184-3p, miR-941, miR-330-5p, miR-103, miR-322-5p, miR-15a-5p, miR-196a-2-3p, miR-431, miR-103a-3p, miR-107, miR-450a-2-3p, miR-25-5p, miR-760-3p, miR-16b, miR-196a-3p, miR-431-5p, novel\_115, miR-125a-3p, miR-1306-5p, miR-326, miR-424-5p, miR-9851-3p, miR-195a-5p, miR-107, miR-1306, miR-15b-5p, miR-424-5p, miR-130b-5p, novel\_9, miR-16a, miR-6740-5p, miR-15a, miR-326-3p, miR-16-5p, miR-665-5p

RAB11A ENSOARGO(RAB11A, )

LPCAT2 ENSOARGO( lysophos:

IRS4 ENSOARGO( insulin:



|         |                    |                                                                                                                                                                                                                                                                                                                                                                                                                                                                                                                                                                                                                                                                                                                                                                                                                                                                                    |
|---------|--------------------|------------------------------------------------------------------------------------------------------------------------------------------------------------------------------------------------------------------------------------------------------------------------------------------------------------------------------------------------------------------------------------------------------------------------------------------------------------------------------------------------------------------------------------------------------------------------------------------------------------------------------------------------------------------------------------------------------------------------------------------------------------------------------------------------------------------------------------------------------------------------------------|
| DNAJC27 | ENSOARGO(DnaJ (Hs: | miR-125b-2-3p, novel_94, miR-3120-5p, miR-20a-3p, miR-1343-3p, miR-32-5p, miR-370-3p, miR-25-3p, miR-25, miR-2404, novel_116, miR-32, miR-92a-3p, miR-92a-3p, miR-2285o, miR-145a-3p, miR-363-3p, miR-92b-3p miR-4429, miR-34a-5p, miR-148a-5p, miR-128-3p, miR-215-5p, miR-345-3p, miR-1197-5p, miR-188-3p, miR-330-5p, miR-124-3p, miR-1343-5p, miR-483-3p, miR-6516-5p, miR-505-5p, novel_121, miR-18a-3p, miR-299a-3p, miR-30d-3p, miR-1224-5p, miR-17-3p, miR-320d, novel_127, miR-299-3p, novel_96, miR-34b-5p, miR-30b-3p, miR-345-3p, miR-148b-5p, miR-2424, miR-30a-3p, miR-543-3p, miR-320a, miR-500a-3p, miR-192-5p, miR-34c-5p, miR-301a-3p, miR-6516, miR-877-5p, miR-22-3p, miR-874-3p, miR-2331-3p, miR-504-5p, miR-552-3p, miR-1271, miR-215-5p, miR-370-5p, miR-216b-3p, miR-370-3p, miR-17-3p, miR-138-5p, miR-204-5p, miR-454-3p, miR-500, miR-370-5p, miR-30e- |
| CHADL   | ENSOARGO(chondroa  | 3p, miR-15b-3p, miR-30a-3p, miR-324-3p, miR-19b-1-5p, miR-6525, novel_42, miR-138, miR-188-5p, miR-7b-5p, miR-484, miR-19b-2-5p, miR-22-3p, miR-7857, miR-2355-3p, miR-2459, miR-148b-5p, miR-9788-3p, miR-2300a-5p, miR-1343-3p, miR-187-3p, miR-26b-3p, miR-130a-3p, miR-130b-3p, miR-124-5p, miR-491-5p, miR-483-3p, miR-103a-2-5p, miR-1343-5p, miR-326, miR-7-5p, miR-320b, miR-2411-3p, miR-2957, miR-124a, miR-628-5p, miR-412-3p, miR-504, miR-1983, miR-18a-3p, miR-216a-3p, miR-150-5p, miR-299b-3p, miR-34b, miR-320c, miR-3120-3p, miR-211-5p, miR-655-5p, miR-2440, novel_82, miR-502-5p, miR-107-5p, miR-34c, miR-24-3p, miR-211, miR-301b-3p, miR-449a, miR-326-3p, miR-1193, miR-17-3p, miR-6527                                                                                                                                                                   |

miR-449a, miR-301b-3p, miR-323c, miR-34c, miR-20a-5p, miR-656-5p, miR-147-5p, miR-502b, miR-26b-5p, miR-3120-3p, miR-320c, miR-677, miR-181b-3p, miR-34b, miR-216a-3p, miR-2483-5p, miR-539-3p, miR-365b-5p, miR-194a, miR-17-5p, miR-106a-5p, miR-660, miR-483-3p, miR-130a-3p, miR-133b-5p, miR-411-5p, miR-20b, miR-3535, miR-2284d, miR-3431, miR-185-5p, miR-450c-3p, miR-194-5p, miR-374b-3p, miR-19b-2-5p, miR-1434-3p, miR-2284ab, miR-138, miR-219a-1-3p, miR-133a-3p, miR-2284v, miR-365a-5p, miR-93, miR-374a-3p, miR-100-3p, miR-2284k, miR-138-5p, miR-3068-3p, miR-34c-5p, miR-769, miR-365a-3p, miR-93-5p, miR-17-5p, miR-320a, miR-20b-5p, miR-10b-3p, miR-329b, miR-3064-5p, miR-3529-3p, miR-2284y, miR-1957a, miR-2285b, miR-2284a, miR-30c-2-3p, miR-217, miR-2285af, miR-2285ad, miR-222, miR-450a-1-3p, miR-483-3p, miR-128-3p, miR-885-3p, miR-2284j, miR-194b-5p, miR-2447, miR-885-5p, miR-8095, miR-1285-5p, miR-371a-5p, miR-769-5p, miR-382-3p, miR-2440, miR-374a-3p, miR-2285t, miR-541-5p, miR-3064-5p, miR-2284g, miR-20a-3p, miR-2483-3p, miR-378j, miR-140-5p, miR-221, miR-335-3p, miR-2284b, miR-1388-3p, miR-106a-5p, miR-3187-3p, miR-30c-1-3p, miR-106b-5p, miR-320b, novel\_115, miR-3085-3p, miR-130b-3p, miR-487b-5p, miR-25-5p, miR-181b-2-3p, miR-151a-3p, miR-1343-3p, miR-221-3p, miR-4791, miR-21b, miR-1388-5p, miR-539-5p, miR-3184-3p, miR-145a-3p, miR-4510, miR-769-5p, miR-151-3p, miR-324-3p, miR-19b-1-5p, miR-320e, miR-15b-3p, miR-222-3p, miR-454-3p, miR-450b-3p, miR-6516-3p, miR-487b-5p, miR-30c-1-3p, miR-660-5p, miR-204-3p, miR-301a-3p, miR-6130, miR-21a-3p, miR-450a-1-3p, miR-625-5p, miR-885-3p, novel\_99, miR-133b-3p, miR-20a, miR-2432, miR-125b-2-3p, miR-181b-1-3p, miR-26a-5p, miR-34b-5p, miR-2484, miR-106a, miR-2284m, miR-320d, miR-485-3p, miR-548a-3p, miR-106a, miR-1247-5p, miR-7850, miR-487a, miR-107-5p, miR-2285y, miR-142b, miR-101-3p, miR-218-5p, miR-335, miR-181d-5p, miR-3956-3p, miR-335-5p, miR-1a-1-5p, novel\_60, miR-154a, miR-8095, miR-21c, miR-216a-3p, miR-140-5p, miR-376b-5p, miR-6516-3p, miR-126b-5p, miR-2285u, miR-541-5p, miR-203-3p, miR-323a-5p, miR-378g, miR-3596, miR-2404, novel\_51, miR-182-5p, miR-7-5p, miR-103a-2-5p, miR-214-3p, miR-1185-5p, miR-1388-3p, novel\_23, miR-145a-5p, miR-4791, miR-7b-5p, miR-181a-5p, miR-708-3p, miR-653, miR-2284ab, miR-21-5p, miR-145b, miR-148b-5p, miR-216a-3p, miR-134-3p, miR-3535, miR-338-5p, miR-30a-3p, miR-30e-3p, miR-2285j, miR-1-5p, miR-208b-5p, novel\_74, miR-214, miR-28a-3p, let-7e-3p, miR-181c-5p, miR-10b-3p, miR-376c-5p, miR-299, miR-1248, miR-582-5p, miR-1827, miR-7144-5p, miR-376c-5p, miR-543-3p, miR-10b-3p, miR-532-5p, miR-182-5p, miR-3065-3p, miR-496-3p, miR-503-3p, miR-140-5p, miR-323-5p, miR-582-5p, miR-217, miR-500a-5p, miR-210-5p, miR-2285p, miR-2285af, miR-205-5p, miR-21-3p, miR-543-5p, miR-760-3p, miR-1a-2-5p, miR-181b-5p, miR-28-3p, miR-30a-3p, miR-216c-5p, miR-3956-5p, miR-3065-3p, miR-130a-5p, miR-188-3p, miR-217-5p, miR-1434-5p, miR-2300b-3p, miR-496, miR-128-3p, miR-30d-3p, miR-3600, miR-7641, miR-2285ad, miR-548e-3p, miR-532-3p, miR-545-5p, miR-7859

RIOK2 ENSOARGO(RIO kina

LMNB1 ENSOARGO(lamin B1

|       |                   |                                                                                                                                                                                                                                                                                                                                                                                                                                                                                                                                                                                                                                                                                                                                                                                                                                                                                                                                                                                                                                                                                                                                                                                                                                                                                                                                                                                                                                                                                                                                                                                                                                                                                                                                                                                            |
|-------|-------------------|--------------------------------------------------------------------------------------------------------------------------------------------------------------------------------------------------------------------------------------------------------------------------------------------------------------------------------------------------------------------------------------------------------------------------------------------------------------------------------------------------------------------------------------------------------------------------------------------------------------------------------------------------------------------------------------------------------------------------------------------------------------------------------------------------------------------------------------------------------------------------------------------------------------------------------------------------------------------------------------------------------------------------------------------------------------------------------------------------------------------------------------------------------------------------------------------------------------------------------------------------------------------------------------------------------------------------------------------------------------------------------------------------------------------------------------------------------------------------------------------------------------------------------------------------------------------------------------------------------------------------------------------------------------------------------------------------------------------------------------------------------------------------------------------|
| FICD  | ENSOARGO(FIC doma | <p>miR-30c-1-3p, miR-30c-1-3p, miR-143-3p, miR-326-3p, miR-326, miR-218-5p, miR-330-5p, miR-30c-2-3p, miR-3955-3p, miR-188-5p<br/> miR-3184-5p, miR-652b, miR-346, novel_44, miR-214, miR-66b-5p, miR-129-2-3p, miR-3074-5p, miR-3184-3p, miR-145a-3p, miR-4510, miR-454-3p, miR-4492, novel_74, miR-450b-3p, miR-664a, miR-324-3p, miR-320e, miR-665, miR-22-3p, novel_32, miR-301a-3p, miR-2284s, miR-6130, miR-3065-3p, miR-216b-3p, miR-370-5p, miR-182-5p, miR-296-3p, miR-30c-1-3p, miR-1277-3p, miR-625-5p, miR-1895, miR-1827, miR-450a-1-3p, miR-486-3p, miR-143-3p, miR-345-3p, miR-329a-5p, miR-34b-5p, miR-299-3p, miR-760-3p, miR-466i-5p, miR-216a-5p, miR-500a-5p, miR-324-3p, miR-185-3p, miR-92a-1-5p, miR-345-3p, novel_17, miR-210-5p, miR-532-3p, miR-328-3p, miR-7859, miR-148b-3p, miR-1b-3p, miR-212-5p, miR-18a-3p, miR-548e-3p, miR-133a-3p, miR-34a-5p, novel_73, miR-19b-3p, miR-1197-5p, miR-188-3p, miR-140-3p, miR-423-5p, miR-452-5p, miR-2284q, miR-2285y, miR-371a-5p, miR-4443, miR-378g, miR-3082-5p, miR-7977, miR-211-5p, miR-</p>                                                                                                                                                                                                                                                                                                                                                                                                                                                                                                                                                                                                                                                                                                                    |
| FAIM2 | ENSOARGO(Fas apop | <p>3064-5p, miR-452-3p, miR-20a-3p, novel_94, miR-299b-5p, miR-361-3p, miR-199b-5p, miR-4532, miR-758-3p, miR-30c-1-3p, miR-1388-3p, miR-2330-5p, miR-199b-5p, miR-214-3p, miR-491-5p, miR-3085-3p, miR-3955-3p, miR-130b-3p, miR-182-5p, miR-342, miR-1306-5p, miR-9788-3p, miR-105-1, novel_78, miR-2300a-5p, miR-1343-3p, miR-409b, miR-3120-5p, miR-450b-5p, miR-758-3p, miR-484, miR-296-5p, miR-365a-5p, miR-1260b, miR-193a-5p, miR-204-5p, miR-486b-3p, miR-138-5p, miR-331-3p, miR-144, miR-6740-5p, miR-29b-3p, miR-410-5p, miR-370-5p, miR-324-5p, miR-199a-5p, miR-34c-5p, miR-2355-5p, miR-370-3p, miR-2285aa, miR-874-3p, miR-23a-5p, miR-485-5p, miR-329b, miR-200a, miR-3065-3p, novel_39, miR-199a-5p, miR-28b, miR-3064-5p, miR-107, novel_96, miR-543-5p, miR-152-3p, novel_127, miR-450a-2-3p, miR-30c-2-3p, miR-181c-3p, miR-2285af, miR-1260a, miR-6119-5p, miR-450a-1-3p, miR-129-1-3p, miR-1224-5p, miR-2285ad, miR-200a-3p, miR-105-2, miR-204-3p, miR-345-<br/> miR-101b-3p, miR-214-3p, miR-452-5p, novel_51, miR-29b-1-5p, miR-197-5p, miR-362-3p, miR-9788-3p, miR-185-5p, miR-412-5p, miR-339-5p, miR-101c, miR-1839-5p, miR-362-3p, miR-412-3p, miR-1843b-5p, miR-301b-5p, miR-329-3p, miR-2284w, miR-301a-5p, miR-101-3p, novel_82, miR-6535, miR-3082-5p, novel_68, miR-379-5p, miR-6395, miR-376a-2-5p, miR-7975, miR-2319a, miR-19a-3p, miR-1291, miR-361-3p, miR-3065-3p, miR-130a-5p, miR-29b-1-5p, miR-195a-3p, miR-221-5p, miR-339a, miR-125a-3p, miR-328-3p, miR-376a-5p, miR-412, novel_79, miR-155-5p, miR-19b-3p, miR-362-3p, miR-6134, miR-214, miR-4510, miR-155-5p, miR-338-5p, miR-155-5p, miR-6130, miR-365a-3p, miR-552-3p, miR-3065-3p, miR-2355-5p, miR-3068-3p, miR-574-5p, miR-221-5p, miR-23a-5p, miR-329a, miR-339b, miR-488-3p</p> |
| TECTA | ENSOARGO(tectorin |                                                                                                                                                                                                                                                                                                                                                                                                                                                                                                                                                                                                                                                                                                                                                                                                                                                                                                                                                                                                                                                                                                                                                                                                                                                                                                                                                                                                                                                                                                                                                                                                                                                                                                                                                                                            |

miR-382-5p, miR-133a-5p, miR-206, miR-379-3p, miR-193b-3p, miR-3065-5p, miR-18a-3p, miR-378b, miR-1291, miR-412-3p, miR-320b, miR-3074-5p, miR-329-5p, miR-146b-3p, miR-670-3p, miR-197-5p, miR-2411-3p, novel\_51, miR-660, miR-452-5p, miR-466f-3p, miR-193a-3p, miR-378a-5p, miR-2483-5p, miR-363-5p, miR-345-5p, miR-145a-5p, miR-181a-5p, miR-1843b-5p, miR-7862, miR-30b-3p, miR-133b-5p, miR-194-3p, miR-3969, miR-126b-3p, miR-331-5p, novel\_9, miR-323-3p, miR-1197-3p, miR-3154, miR-488-3p, miR-331-5p, miR-23a-5p, miR-345-5p, miR-329a, miR-365a-3p, miR-30c-2-3p, miR-2285af, novel\_127, miR-181b-5p, miR-1, miR-3064-5p, miR-4286, miR-181a-2-3p, miR-3529-3p, miR-376b-5p, miR-29a-5p, miR-3065-3p, miR-376c-5p, miR-148b-5p, miR-218-2-3p, miR-3591-5p, miR-345-3p, miR-411-3p, miR-2285ad, miR-545-5p, miR-6516-5p, miR-107-5p, miR-2285n, miR-4726-5p, miR-181d-5p, miR-3059-5p, novel\_60, miR-3956-3p, miR-1285-5p, miR-1983, miR-2285u, miR-3064-5p, miR-2483-3p, miR-505, miR-362-3p, miR-103a-2-5p, miR-3085-3p, miR-652-5p, miR-124a, miR-494-3p, miR-3187-3p, miR-193a, miR-30c-1-3p, miR-1a-3p, miR-7857, miR-30b-3p, miR-329-3p, miR-362-3p, miR-450b-5p, miR-145b, miR-222-5p, miR-2459, miR-665, miR-2285j, miR-4492, miR-208b-5p, miR-874-5p, novel\_74, miR-425-5p, miR-3184-3p, miR-3074-5p, miR-6134, miR-206-3p, miR-433-3p, miR-21a-3p, miR-625-5p, miR-345-5p, miR-3065-3p, miR-532-5p, miR-30c-1-3p, miR-660-5p, novel\_25, miR-877-5p, miR-6516, miR-193b-3p, miR-219b-5p, miR-324-3p, miR-185-3p, miR-345-3p, miR-2285p, miR-202-5p, miR-466i-5p, miR-329a-5p, miR-124-3p, miR-1193, miR-362-3p, miR-378d, miR-33b-3p, miR-3600, miR-18a-3p, novel\_83

miR-370-3p, miR-235b-5p, miR-141-3p, miR-395b, miR-61b-5p, miR-215-5p, miR-300-3p, miR-381-3p, miR-10b-3p, miR-767, let-7g-3p, miR-329a, miR-16-5p, miR-133a-3p, miR-1197-3p, miR-2284k, miR-370-5p, miR-144, miR-138-5p, miR-767-5p, miR-429-3p, miR-412, miR-322-5p, miR-1271-5p, miR-582-3p, miR-345-3p, miR-1290, miR-30a-5p, miR-300, miR-200b-3p, let-7a-2-3p, miR-181a-2-3p, miR-3065-3p, miR-200a, miR-205-5p, miR-200c, miR-127-5p, miR-181b-5p, miR-200c-3p, miR-200a-3p, miR-543-5p, miR-329-5p, miR-7-1-3p, miR-2404, miR-670-3p, miR-144-3p, miR-2285ab, miR-150-5p, miR-1306, miR-412-3p, miR-2285k, miR-7975, miR-195a-5p, miR-342-3p, miR-219b-3p, miR-335-5p, miR-1193, miR-24-3p, miR-15a, miR-4324, miR-16a, novel\_87, novel\_1, miR-199c, miR-147-5p, miR-133b-5p, miR-2285g, miR-412-5p, miR-2284d, miR-134-3p, novel\_116, miR-6238, miR-544b, miR-7b-5p, miR-1285, miR-1434-3p, miR-181a-3p, miR-2113, miR-22-3p, novel\_23, miR-30b-3p, miR-138, miR-16b, miR-2284ab, miR-16-1-3p, miR-26a-2-3p, miR-497-5p, miR-27b-3p, miR-2284x, miR-539-3p, let-7a-2-3p, miR-7-5p, miR-377-3p, miR-2411-3p, miR-106b-3p, miR-221-5p, miR-3065-3p, miR-370-5p, miR-552-3p, miR-192-5p, miR-544-3p, miR-377-3p, miR-216b-5p, miR-6130, miR-22-3p, miR-204-3p, miR-15b-5p, miR-21a-3p, miR-2285c, miR-30d-5p, miR-2312, let-7g-3p, miR-133b-3p, miR-543-3p, novel\_99, miR-539-5p, miR-4510, miR-1271, miR-214, miR-425-5p, miR-181c-5p, miR-30e-3p, miR-324-3p, miR-30a-3p, miR-338-5p, miR-424-5p, miR-4492, miR-1b-3p, miR-212-5p, miR-487a-3p, miR-15a-5p, miR-200b, novel\_133, miR-362-3p, miR-2300b-3p, miR-215-5p, miR-2904, miR-124-3p, miR-1197-5p, miR-16-1-3p, miR-329a-5p, miR-195a-3p, miR-376a-5p, miR-2285i, miR-125b-2-3p, miR-143-3p, miR-30b, miR-210-5p, miR-2285p, miR-374a-5p, miR-216a-5p, miR-3601, miR-185-3p, miR-345-3p, miR-2284m, miR-221-5p, miR-30d, miR-150-3p, miR-335-3p, miR-411-3p, miR-499a-5p, miR-653, miR-125a-3p, miR-2424, miR-203-3p, miR-2284w, novel\_121, miR-7859, miR-552-3p, miR-548e-3p

|       |                   |                                                                                                                                                                                                                                                                                                                                                                                                                                                                                                                                                                                                                                                                                                                                                                                                                                                                                                                                                                                                                                                                                                                                                                                                                                                                                                                                                                                                                                                                                                                                                                                                                                                                                                                                                                                                                                                                                                                                                                                                                                                                                                                                                                                                                                                                                                                                                                                                                                                                                                                                                                                                                                                                                                                                                                                                                                                                                                                                                                                                                                                                                                              |
|-------|-------------------|--------------------------------------------------------------------------------------------------------------------------------------------------------------------------------------------------------------------------------------------------------------------------------------------------------------------------------------------------------------------------------------------------------------------------------------------------------------------------------------------------------------------------------------------------------------------------------------------------------------------------------------------------------------------------------------------------------------------------------------------------------------------------------------------------------------------------------------------------------------------------------------------------------------------------------------------------------------------------------------------------------------------------------------------------------------------------------------------------------------------------------------------------------------------------------------------------------------------------------------------------------------------------------------------------------------------------------------------------------------------------------------------------------------------------------------------------------------------------------------------------------------------------------------------------------------------------------------------------------------------------------------------------------------------------------------------------------------------------------------------------------------------------------------------------------------------------------------------------------------------------------------------------------------------------------------------------------------------------------------------------------------------------------------------------------------------------------------------------------------------------------------------------------------------------------------------------------------------------------------------------------------------------------------------------------------------------------------------------------------------------------------------------------------------------------------------------------------------------------------------------------------------------------------------------------------------------------------------------------------------------------------------------------------------------------------------------------------------------------------------------------------------------------------------------------------------------------------------------------------------------------------------------------------------------------------------------------------------------------------------------------------------------------------------------------------------------------------------------------------|
| TAB3  | ENSOARGO(TGF-beta | <p>miR-361-3p, miR-2387, miR-199b-5p, miR-378b, miR-3963, miR-19a-3p, miR-493-5p, miR-195a-5p, miR-139-5p, miR-211-5p, miR-26b-5p, miR-2404, miR-670-3p, miR-2483-3p, miR-203-3p, miR-27a-3p, miR-15a, miR-30b-5p, miR-16a, miR-342-3p, miR-2285x, novel_101, miR-181d-5p, miR-211, miR-199b-5p, miR-6529a, miR-181a-5p, miR-125b-2-3p, miR-16b, miR-744-5p, miR-7862, miR-27b-3p, novel_78, miR-27a-3p, miR-412-5p, miR-539-5p, miR-216a-3p, miR-194-3p, miR-148b-5p, miR-224-5p, miR-342, miR-197-5p, miR-16b, miR-182-5p, miR-378a-5p, miR-199b-5p, miR-1343-5p, miR-493-5p, miR-101b-3p, miR-382-3p, miR-424-5p, miR-23a-3p, miR-30e-5p, miR-30d-5p, miR-411, miR-10b-3p, miR-30f, miR-7144-5p, miR-625-5p, miR-2355-5p, miR-182-5p, miR-139-5p, miR-199a-5p, miR-15b-5p, miR-2285j, miR-19b-1-5p, miR-487b-5p, miR-424-5p, miR-204-5p, miR-3607-3p, miR-16-5p, miR-224-5p, miR-181c-5p, miR-30c-5p, miR-1246, miR-193b-5p, miR-1290, miR-2366, miR-2904, miR-1343-5p, miR-2427, miR-30a-5p, miR-140-3p, miR-493-3p, miR-19b-3p, miR-30c, miR-148a-5p, miR-322-5p, miR-15a-5p, miR-2411-5p, miR-222-5p, novel_83, miR-1247-5p, miR-30b, miR-26a-5p, miR-500a-5p, miR-30f, miR-181b-5p, miR-30d, miR-183-5p, miR-345-3p, miR-125b-2-3p, miR-199a-5p, miR-2411, miR-29a-5p</p> <p>miR-505-5p, novel_83, miR-2284z, miR-214-5p, miR-129-1-3p, miR-18a-3p, miR-412, miR-885-3p, miR-193b-5p, miR-2904, miR-1197-5p, miR-140-3p, miR-5703, miR-501-3p, novel_39, miR-486-3p, miR-1271-3p, miR-105-3p, miR-495-5p, miR-127-5p, miR-466i-5p, novel_127, miR-21-3p, novel_17, miR-219b-5p, miR-30c-2-3p, miR-125b, miR-377-3p, miR-6130, miR-154b-5p, miR-30c-1-3p, miR-21-3p, miR-125a, miR-23a-5p, miR-885-3p, miR-1827, miR-671-5p, miR-21a-3p, miR-365a-5p, miR-6134, miR-433-5p, miR-145a-3p, miR-4510, miR-3184-3p, miR-129-2-3p, miR-2330-3p, miR-214, miR-3074-2-3p, miR-708-5p, miR-874-5p, miR-486b-3p, miR-28-5p, miR-2285j, miR-2433, miR-125b-5p, miR-331-3p, miR-665, miR-135a-5p, miR-9788-3p, miR-2459, miR-340-3p, novel_4, miR-26b-3p, miR-30b-3p, miR-101a-5p, miR-2426, miR-381-5p, miR-2284aa, miR-873a-5p, miR-301b-5p, miR-541, miR-412-3p, miR-501-3p, miR-197-3p, miR-30b-3p, novel_23, miR-30c-1-3p, miR-432-3p, miR-432-3p, miR-193a, miR-8485, miR-494-3p, miR-363-5p, miR-101-5p, miR-106b-3p, miR-125a-5p, miR-214-3p, miR-381-5p, miR-342, miR-377-3p, miR-2285v, miR-365b-5p, miR-2483-3p, miR-4443, miR-500-3p, miR-320b, miR-7977, miR-1291, miR-450b-3p, miR-135b-5p, novel_94, miR-361-3p, miR-18a-3p, miR-3591-3p, miR-877-3p, miR-361-3p, miR-24-3p, miR-502-3p, miR-342-3p, miR-541-3p, miR-128-1-5p, miR-499a-5p, miR-4726-5p, miR-22-5p, miR-147-5p, miR-4324, miR-576-3p, miR-301a-5p</p> <p>miR-30b-3p, miR-22-3p, miR-143-5p, miR-1843b-5p, miR-484, miR-7862, miR-30b-3p, miR-103a-3p, miR-6517, miR-103, miR-194-3p, miR-503-5p, miR-503-5p, miR-221-5p, miR-107, miR-503-5p, miR-1271-3p, miR-107, miR-320b, miR-4792, miR-221-5p, miR-154b-5p, miR-22-3p, miR-665, miR-664a-5p, miR-2285t, miR-4492, miR-4726-5p, miR-128-1-5p, miR-103b, miR-6134, miR-2428</p> |
| TEF   | ENSOARGO(thyrotro |                                                                                                                                                                                                                                                                                                                                                                                                                                                                                                                                                                                                                                                                                                                                                                                                                                                                                                                                                                                                                                                                                                                                                                                                                                                                                                                                                                                                                                                                                                                                                                                                                                                                                                                                                                                                                                                                                                                                                                                                                                                                                                                                                                                                                                                                                                                                                                                                                                                                                                                                                                                                                                                                                                                                                                                                                                                                                                                                                                                                                                                                                                              |
| MFAP4 | ENSOARGO(microfib |                                                                                                                                                                                                                                                                                                                                                                                                                                                                                                                                                                                                                                                                                                                                                                                                                                                                                                                                                                                                                                                                                                                                                                                                                                                                                                                                                                                                                                                                                                                                                                                                                                                                                                                                                                                                                                                                                                                                                                                                                                                                                                                                                                                                                                                                                                                                                                                                                                                                                                                                                                                                                                                                                                                                                                                                                                                                                                                                                                                                                                                                                                              |

miR-34c-5p, miR-365a-3p, miR-223-5p, miR-874-3p, miR-235b-5p, miR-370-3p, miR-125a, miR-1271, miR-10b-3p, miR-345-5p, miR-329b, miR-20b-5p, miR-23a-5p, miR-93-5p, miR-3154, miR-18a, miR-17-5p, miR-93, miR-1197-3p, miR-16-5p, miR-133a-3p, miR-138-5p, miR-486b-3p, miR-2433, miR-100-3p, miR-331-3p, miR-125b-5p, miR-6740-5p, miR-322-5p, miR-505-5p, miR-483-3p, miR-758-5p, miR-1271-5p, miR-6516-5p, miR-6517, miR-1224-5p, miR-412, miR-18b-5p, miR-885-3p, miR-105-2, miR-128-3p, miR-3578, miR-23b-5p, miR-330-5p, novel\_39, miR-3065-3p, miR-3529-3p, miR-17-3p, miR-127-5p, novel\_127, miR-543-5p, miR-125a-3p, miR-30c-2-3p, miR-2404, miR-670-3p, miR-34b, miR-677, miR-181b-3p, novel\_68, miR-3074-5p, miR-329-5p, miR-320b, miR-3120-3p, miR-1291, miR-9851-3p, miR-195a-5p, miR-3141, miR-2387, miR-18b, miR-3970, miR-21c, miR-216a-3p, miR-18a-3p, miR-24-3p, miR-326-3p, miR-449a, miR-219b-3p, miR-193b-3p, miR-17-3p, miR-656-5p, miR-147-5p, miR-4324, miR-15a, miR-6402, miR-20a-5p, miR-34c, miR-16a, miR-33a-3p, miR-432-5p, miR-134-3p, miR-185-5p, miR-149-5p, miR-20b, miR-377-5p, miR-16b, miR-138, miR-497-5p, miR-4508, miR-744-5p, miR-27b-3p, miR-432, miR-1843b-5p, miR-431-3p, miR-22-3p, novel\_23, miR-3071-5p, miR-432-3p, miR-432-3p, miR-345-5p, miR-130b-5p, miR-363-5p, miR-668-3p, miR-378a-5p, miR-124-5p, miR-483-3p, miR-452-5p, miR-125a-5p, miR-193a-3p, miR-105-5p, miR-3141, novel\_51, miR-17-5p, miR-106a-5p, miR-499b-3p, miR-6516, miR-2284s, miR-193b-3p, miR-22-3p, novel\_32, miR-151b, miR-15b-5p, miR-30c-1-3p, miR-504-5p, miR-3065-3p, miR-182-5p, miR-296-3p, miR-133b-3p, miR-18a-5p, miR-345-5p, miR-885-3p, miR-1895, miR-1827, miR-21a-3p, miR-129b-3p, miR-27b-5p, miR-433-3p, miR-346, miR-3074-5p, miR-1271, miR-214, miR-17-3p, miR-874-5p, miR-487a-5p, miR-4492, miR-424-5p, miR-130b-5p, miR-15a-5p, novel\_83, miR-151-5p, miR-18a-3p, miR-

miR-22-5p, miR-203b-5p, miR-199c, miR-20a-5p, novel\_87, miR-24-3p, miR-371b-3p, novel\_27, miR-199b-5p, miR-2284w, miR-342-3p, novel\_120, miR-136-3p, miR-17-3p, miR-450b-3p, miR-412-3p, miR-6395, miR-135b-5p, miR-148a-3p, miR-216a-3p, miR-3065-5p, miR-21c, miR-3591-3p, miR-18a-3p, miR-299b-3p, novel\_68, miR-3074-5p, miR-320b, miR-378a-5p, miR-503-5p, miR-377-3p, miR-330-3p, miR-105-5p, miR-106a-5p, miR-17-5p, miR-539-3p, let-7j, let-7a-2-3p, miR-380-5p, miR-6240, let-7f-2-3p, let-7f-2-3p, miR-628-5p, miR-21-5p, miR-1260b, miR-7862, miR-27b-3p, miR-542-3p, miR-1434-3p, miR-1843b-5p, miR-22-3p, miR-145a-5p, miR-503-5p, novel\_116, miR-20b, miR-544b, miR-26b-3p, novel\_9, miR-486b-3p, miR-134-5p, miR-135a-5p, miR-93, miR-1260b, miR-28a-3p, miR-193a-5p, miR-144-5p, novel\_91, miR-329a, let-7g-3p, miR-3074-1-3p, miR-20b-5p, miR-1814c, miR-1248, miR-488-3p, miR-2448-3p, miR-93-5p, miR-200a-5p, miR-17-5p, miR-3154, miR-374c-3p, miR-365a-3p, miR-199a-5p, miR-2355-5p, miR-3956, miR-17-3p, miR-28-3p, miR-152-3p, novel\_127, miR-205-5p, miR-1260a, miR-664-3p, miR-125a-3p, miR-30c-2-3p, miR-181c-3p, miR-217, miR-380-5p, miR-450b-5p, miR-2478, miR-1957a, miR-199a-5p, miR-2285b, miR-490-3p, miR-29b-2-5p, miR-30a-3p, miR-4286, miR-181a-2-3p, miR-2403, miR-105-2, miR-128-3p, let-7a-2-3p, miR-134, miR-1290, miR-758-5p, miR-134-5p, miR-486-5p, novel\_121, miR-299a-3p, miR-423-3p, miR-7641, miR-431, miR-499a-5p, miR-101-3p, miR-2440, miR-371a-5p, miR-877-3p, miR-1285-5p, miR-423-5p, novel\_60, miR-3059-5p, miR-2447, miR-3956-3p, miR-6527, novel\_94, miR-1983, miR-140-5p, miR-361-3p, miR-199b-5p, miR-381-3p, miR-7857-3p, miR-2483-3p, miR-3082-5p, miR-144-5p, miR-1185-2-3p, miR-27a-3p, miR-664b, miR-139-5p, miR-10b, miR-199b-5p, miR-153-3p, miR-214-3p, miR-212-3p, miR-131-5p, miR-262-3p, miR-29b-1-5p, miR-106b-5p, miR-7975, miR-185-5p, miR-216a-5p, miR-133a-5p, miR-1388-3p, miR-216c-5p

SORL1 ENSOARGO(sortilin)

AAGAB ENSOARGO(alpha-a)



miR-1b-3p, miR-212-5p, miR-3960, miR-106a, miR-1247-5p, miR-1197-5p, miR-5703, miR-33b-3p, miR-195a-3p, miR-20a, miR-329a-5p, miR-2411, miR-421-5p, miR-29b-1-5p, miR-142a-3p, miR-216a-5p, miR-125b, miR-196a-3p, miR-208b-3p, miR-210-5p, miR-26a-5p, miR-30b-3p, miR-21-3p, miR-106a, miR-532-5p, miR-341-3p, miR-140-5p, miR-6516, miR-1895, miR-3958-5p, miR-214, miR-3074-5p, miR-145a-3p, miR-6134, miR-181c-5p, miR-769-5p, miR-206-3p, novel\_44, miR-224-5p, miR-19b-1-5p, miR-665, miR-29b-2-5p, miR-2285j, miR-129-5p, miR-130b-5p, miR-664a, miR-145b, miR-222-5p, miR-2300a-5p, miR-1343-3p, miR-216a-3p, miR-421, miR-142-3p, miR-2320-3p, miR-1a-3p, miR-125b-2-3p, miR-484, miR-296-5p, miR-301b-5p, miR-541, miR-450b-5p, miR-744-3p, miR-106a-5p, miR-1839-3p, miR-8485, miR-2310, miR-29b-1-5p, miR-505, miR-106b-5p, miR-342, miR-326, miR-214-3p, novel\_124, miR-25-5p, miR-2319b, miR-1296-5p, miR-181d-5p, miR-541-3p, miR-877-3p, miR-769-5p, miR-301a-5p, miR-101-3p, miR-4726-5p, miR-196a-2-3p, miR-545-5p, miR-214-5p, miR-505-5p, miR-6516-5p, miR-2411-5p, miR-1343-5p, miR-330-5p, miR-29b-2-5p, miR-1, miR-4286, novel\_39, miR-1271-3p, miR-450b-5p, miR-205-5p, miR-2397-5p, miR-543-5p, miR-181b-5p, miR-542-5p, miR-125a, miR-574-5p, miR-769, miR-93-5p, miR-3154, miR-17-5p, miR-20b-5p, miR-3074-1-3p, miR-1814c, miR-329b, miR-93, miR-2903, miR-125b-5p, miR-2433, miR-2332, miR-592, miR-31-5p, novel\_116, miR-20b, miR-2355-3p, miR-412-5p, miR-197-3p, miR-145a-5p, miR-19b-2-5p, miR-873a-5p, miR-1285, miR-181a-5p, miR-4508, miR-2889, miR-744-5p, miR-21-5p, miR-3432b, miR-2483-5p, miR-130b-5p, miR-17-5p, novel\_51, miR-106a-5p, miR-224-5p, miR-106b-3p, miR-125a-5p, miR-1343-5p, miR-124-5p, miR-655-5p, miR-26b-5p, miR-3074-5p, miR-329-5p, miR-2404, miR-21c, miR-410-5p, miR-1839-3p, novel\_101, miR-342-3p, novel\_27, miR-326-3p, miR-371b-

miR-2411-3p, miR-194a, miR-193a-3p, miR-2285r, miR-432-3p, miR-539-3p, miR-194-5p, miR-22-3p, miR-197-3p, miR-16-1-3p, miR-219a-1-3p, miR-30b-3p, miR-16b, miR-497-5p, miR-26a-2-3p, miR-2285g, novel\_116, miR-411-5p, miR-194-3p, miR-28c, miR-142b, miR-4324, miR-15a, miR-16a, miR-379-3p, miR-219b-3p, miR-2285x, miR-193b-3p, miR-3959-3p, miR-323c, miR-211, miR-374c-5p, miR-18b, miR-2285ab, miR-3065-5p, miR-195a-5p, miR-2319a, miR-216b-3p, miR-7-1-3p, miR-411b-3p, miR-144-3p, miR-219-3p, miR-217, miR-3071-3p, miR-127-5p, miR-450a-2-3p, miR-200a-3p, miR-2478, miR-28b, miR-3956-5p, miR-376c-5p, miR-200a, novel\_39, miR-345-3p, miR-30a-5p, miR-582-3p, miR-411-3p, miR-155-5p, miR-6517, miR-18b-5p, miR-6516-5p, miR-322-5p, miR-129-1-3p, novel\_121, miR-545-5p, miR-135a-1-3p, miR-34c-3p, miR-410-5p, miR-6740-5p, miR-144, miR-486b-3p, miR-592, miR-204-5p, miR-31-3p, miR-1306-5p, miR-16-5p, miR-503-3p, miR-488-3p, miR-30e-5p, miR-18a, miR-3154, miR-1814c, novel\_48, miR-141-3p, novel\_115, miR-16b, miR-487b-5p, miR-1185-5p, miR-103a-2-5p, miR-494-3p, miR-424-5p, miR-376b, miR-2310, miR-301b-5p, miR-30b-3p, miR-450b-5p, miR-3120-5p, miR-21b, miR-101c, novel\_4, miR-5010-3p, miR-539-5p, miR-1298-3p, miR-2285e, miR-421, miR-455-3p, miR-9788-3p, miR-216a-3p, miR-107-5p, miR-301a-5p, miR-490-5p, miR-452-5p, miR-194b-5p, miR-2285f, miR-6527, miR-219a-2-3p, miR-409-5p, miR-140-5p, miR-381-3p, miR-504, miR-668-5p, miR-2319b, miR-211-5p, miR-2483-3p, miR-203-3p, miR-618, miR-345-3p, miR-760-3p, miR-2484, miR-21-3p, miR-30d, miR-221-5p, miR-30b-3p, miR-2285w, miR-2887, miR-369-3p, miR-486-3p, miR-217-5p, miR-5703, miR-218-1-3p, miR-16-1-3p, miR-15a-5p, miR-487a-3p, miR-2284h-5p, miR-655-3p, miR-219b-3p, miR-324-3p, miR-29d-5p, miR-155-5p, miR-487a-5p, miR-424-5p, miR-129-2-3p, miR-2184-3p, miR-530-5p, miR-29c-5p, miR-2285c, miR-21a-3p, miR-34c-5p, miR-10a, miR-192-5p, miR-139-5p, miR-22-3p, miR-2331-3p, miR-874-3p, miR-2355-5p, miR-215-5p, miR-1827, miR-10b-5p, miR-3958-5p, miR-665-5p, miR-214, miR-874-5p, miR-4492, miR-486b-3p, miR-410-5p, miR-2433, miR-331-3p, miR-3600, miR-1224-5p, miR-142-3p, miR-10a-5p, miR-34a-5p, miR-1246, miR-2366, miR-1290, miR-2300b-3p, miR-215-5p, miR-1343-5p, miR-486-3p, miR-490-3p, miR-1271-3p, miR-2898, miR-34b-5p, miR-324-3p, miR-3601, miR-185-3p, miR-34b, miR-669, novel\_68, miR-139-5p, miR-10a-5p, miR-7977, miR-410-5p, miR-361-3p, miR-1306, miR-150-5p, miR-361-3p, miR-449a, miR-2428, novel\_60, miR-3956-3p, miR-541-3p, miR-1839-3p, miR-495-3p, miR-4726-5p, miR-128-1-5p, miR-203b-5p, miR-6123, miR-34c, miR-382-5p, miR-147a, miR-149-5p, miR-133b-5p, miR-2300a-5p, miR-4508, miR-744-5p, miR-484, miR-296-5p, miR-2284r, miR-10b, miR-541, miR-22-3p, miR-4532, miR-1839-3p, miR-1343-5p, miR-214-3p, miR-1306-5p

PEX1

ENSOARGO(peroxisome)

RANBP1

ENSOARGO(RAN binding)

miR-576-3p, miR-133a-5p, miR-769-5p, miR-3968, miR-219b-3p, miR-2285f, miR-758-5p, miR-495-3p, miR-323c, miR-423-5p, miR-199b-5p, miR-2285ab, miR-199b-5p, miR-3591-3p, miR-381-3p, miR-96-5p, miR-504, miR-6516-3p, miR-544-5p, novel\_68, miR-10a-5p, miR-411b-3p, miR-677, miR-181b-3p, miR-7-5p, miR-296-3p, miR-330-3p, miR-2411-3p, miR-199b-5p, miR-466f-3p, miR-2330-5p, miR-6240, miR-2483-5p, miR-744-3p, miR-2285r, miR-654-3p, miR-296-3p, miR-19b-2-5p, miR-7b-5p, miR-10b, miR-1434-3p, miR-542-3p, miR-197-3p, miR-544a, miR-219a-1-3p, miR-3120-5p, miR-330-3p, miR-2300a-5p, miR-665, miR-181b-2-3p, miR-147a, miR-2320-3p, miR-149-5p, miR-216a-3p, miR-2459, miR-544b, let-7b-3p, miR-30a-3p, miR-324-3p, miR-19b-1-5p, novel\_74, miR-708-5p, miR-28-5p, miR-1271, miR-3074-2-3p, miR-769-5p, miR-10b-5p, miR-98-3p, miR-3184-5p, let-7f-1-3p, miR-129b-3p, miR-1248, miR-671-5p, miR-504-5p, miR-874-3p, miR-503-3p, miR-21-3p, miR-544-3p, miR-10a, miR-769, miR-656-3p, miR-324-5p, miR-199a-5p, miR-2285p, miR-345-3p, miR-466i-5p, miR-760-3p, miR-30b-3p, miR-2484, miR-30a-3p, miR-345-3p, miR-181b-1-3p, miR-199a-5p, miR-143-3p, miR-3591-5p, miR-345-3p, miR-98-3p, miR-140-3p, miR-1193, miR-142-3p, miR-582-3p, miR-133a-3p, miR-10a-5p, let-7a-3p, miR-380-5p, miR-30d-3p, miR-222-5p, miR-1271-5p, miR-2319a, miR-9851-3p, miR-146b-5p, miR-378f, miR-1291, miR-1306, miR-216a-3p, miR-18a-3p, miR-2285ab, miR-2387, miR-18b, miR-320c, miR-669, miR-146b-3p, miR-670-3p, miR-29a-3p, miR-34b, miR-7-1-3p, miR-128-1-5p, miR-29a, miR-34c, miR-1247-3p, miR-20a-5p, miR-28c, miR-449a, miR-326-3p, miR-2285m, miR-1307-3p, miR-29c-3p, novel\_101, miR-342-3p, miR-744-5p, miR-2889, miR-29b, miR-30b-3p, miR-197-3p, miR-194-5p, miR-432, miR-542-3p, miR-20b, miR-412-5p, miR-432-5p, miR-134-3p, miR-185-5p, miR-339-5p, miR-187-3p, miR-125a-5p, miR-196b-5p, miR-106a-5p, miR-194a, miR-17-5p, miR-146a, miR-2285r, miR-654-3p, miR-432-3p, miR-493-5p, miR-7144-5p, miR-20b-5p, miR-485-5p, miR-671-5p, miR-93-5p, miR-18a, miR-320a, miR-17-5p, miR-30e-5p, miR-488-3p, miR-34c-5p, miR-2355-5p, miR-125a, miR-574-5p, miR-125b-5p, miR-331-3p, miR-6740-5p, miR-410-5p, miR-29b-3p, miR-1306-3p, miR-378c, miR-93, miR-1197-3p, miR-193a-5p, novel\_42, miR-128-3p, miR-30c, miR-200b-3p, miR-582-3p, miR-29d-3p, miR-30a-5p, miR-330-5p, miR-196a-5p, miR-545-5p, miR-486-5p, miR-129-1-3p, miR-505-5p, miR-1271-5p, miR-378h, novel\_79, miR-18b-5p, miR-429-3p, miR-543-5p, novel\_127, miR-450a-2-3p, miR-200c-3p, miR-30f, miR-339a, miR-200c, miR-2397-5p, miR-200a, miR-3065-3p, miR-2284y, miR-2284a, miR-192-3p, miR-2285b, miR-28b, miR-148b-5p, miR-29b-2-5p, miR-495-5p, miR-493-5p, miR-96-5p, miR-1306-3p, miR-361-3p, miR-4443, miR-7857-3p, miR-378e, miR-378g, miR-3596, miR-3082-5p, miR-7977, miR-2284g, miR-30b-5p, miR-218-5p, miR-2440, miR-423-5p, miR-7705, miR-361-3p, miR-877-3p, miR-194b-5p, miR-452-5p, novel\_60, miR-3956-3p, miR-541-3p, miR-378c, miR-323b, miR-3962, miR-30b-3p, miR-2284r, miR-296-5p, miR-484, miR-378b, miR-541, miR-216a-3p, miR-1298-3p, novel\_78, miR-1343-3p, miR-409b, miR-146b, miR-2285o, miR-20b-1-5p, miR-323b-3p, miR-106b-5p, miR-390b, miR-

CTLA4 ENSOARGO( cytotoxi

GRHL2 ENSOARGO( grainyhe

|        |                    |                                                                                                                                                                                                                                                                                                                                                                                                                                                                                                                                                                                                                                                                                                                                                                                                                                                                                                                                                                                                                                                                                                                                                                                                                                                                                                                                                                                                                                                                                                                                                                                                                                                                                                                                                                                                                                                                                                                                                                                                                                            |
|--------|--------------------|--------------------------------------------------------------------------------------------------------------------------------------------------------------------------------------------------------------------------------------------------------------------------------------------------------------------------------------------------------------------------------------------------------------------------------------------------------------------------------------------------------------------------------------------------------------------------------------------------------------------------------------------------------------------------------------------------------------------------------------------------------------------------------------------------------------------------------------------------------------------------------------------------------------------------------------------------------------------------------------------------------------------------------------------------------------------------------------------------------------------------------------------------------------------------------------------------------------------------------------------------------------------------------------------------------------------------------------------------------------------------------------------------------------------------------------------------------------------------------------------------------------------------------------------------------------------------------------------------------------------------------------------------------------------------------------------------------------------------------------------------------------------------------------------------------------------------------------------------------------------------------------------------------------------------------------------------------------------------------------------------------------------------------------------|
| ARL16  | ENSOARGOC ADP-ribo | <p>miR-1260b, miR-1197-3p, miR-6525, miR-326-3p, miR-3074-5p, miR-144-5p, miR-452-5p, miR-6123, miR-3432a, miR-2285j, miR-3596, miR-146b-3p, miR-27a-5p, miR-144-5p, miR-3074-5p, miR-2331-3p, miR-221-5p, miR-3065-3p, miR-345-5p, miR-345-5p, miR-3963, miR-6516-3p, miR-1248, miR-625-5p, miR-3074-1-3p, miR-150-5p, miR-1306, miR-2478, miR-29b-1-5p, miR-490-3p, miR-345-5p, miR-3065-3p, miR-3187-3p, miR-491-5p, novel_96, miR-221-5p, miR-1306-5p, novel_17, miR-326, miR-1260a, miR-29b-1-5p, miR-505-5p, miR-214-5p, miR-6517, miR-1343-3p, miR-299a-5p, miR-1260b, miR-142-3p, miR-378d, miR-21b, miR-542-3p, novel_133, miR-3962, miR-1193, miR-330-5p, miR-656-5p, miR-2284q, miR-502b, miR-4726-5p, miR-2285n, miR-20a-5p, miR-502-3p, miR-423-5p, miR-211, miR-212-3p, miR-541-3p, miR-335-3p, miR-19a-3p, miR-504, miR-150-5p, miR-381-3p, miR-361-3p, miR-320c, miR-4443, miR-500-3p, miR-2285u, miR-211-5p, miR-3064-5p, miR-125a-5p, miR-1343-5p, miR-3085-3p, miR-25-5p, miR-106a-5p, miR-17-5p, miR-320b, miR-8485, miR-432-3p, miR-432-3p, miR-2284l, miR-363-5p, miR-106a-5p, miR-138, miR-1388-5p, miR-1260b, miR-2426, miR-501-3p, miR-450c-3p, miR-432, miR-873a-5p, miR-1285, miR-541, miR-6238, miR-432-5p, miR-1298-3p, novel_4, novel_78, miR-1343-3p, miR-500, miR-208b-5p, miR-4492, miR-204-5p, miR-138-5p, miR-450b-3p, miR-331-3p, miR-324-3p, miR-6740-5p, miR-125b-5p, miR-320e, miR-2433, miR-99b-3p, miR-3184-5p, miR-93, miR-6525, miR-1260b, miR-2330-3p, miR-4510, miR-20b-5p, miR-485-5p, miR-10b-3p, miR-500a-3p, miR-93-5p, miR-320a, miR-381-3p, miR-450a-1-3p, novel_32, miR-6130, miR-216b-5p, miR-99a-3p, miR-125a, miR-504-5p, miR-106a, miR-450a-2-3p, miR-2898, miR-320d, miR-99a-3p, miR-127-5p, miR-324-3p, miR-125b, miR-185-3p, miR-2285af, miR-1260a, miR-210-5p, novel_17, miR-20a, miR-3064-5p, miR-378d, miR-941, miR-4429, miR-300, miR-1343-5p, miR-1197-5p, miR-501-3p, miR-188-3p, miR-532-3p, miR-450a-1-3p, miR-24-2-5p, miR-7859, miR-383-5p, miR-548e-3p, miR-106a</p> |
| TMBIM6 | ENSOARGOC transmem |                                                                                                                                                                                                                                                                                                                                                                                                                                                                                                                                                                                                                                                                                                                                                                                                                                                                                                                                                                                                                                                                                                                                                                                                                                                                                                                                                                                                                                                                                                                                                                                                                                                                                                                                                                                                                                                                                                                                                                                                                                            |

miR-2310, miR-378d, miR-101b-3p, miR-574-3p, miR-214-3p, miR-130b-3p, miR-487b-5p, miR-16b, miR-323b-3p, miR-505, miR-199a-3p, miR-455-3p, miR-1343-3p, miR-758-3p, miR-1a-3p, miR-323b, miR-541, miR-2284j, miR-3956-3p, miR-218-5p, miR-2483-3p, miR-211-5p, miR-374b-5p, miR-2319b, miR-9-3p, miR-1983, miR-335-3p, miR-668-5p, miR-136-5p, miR-504, miR-96-5p, miR-140-5p, miR-380-3p, miR-486-3p, miR-376a-5p, miR-345-3p, miR-369-3p, miR-202-5p, miR-422a, miR-324-3p, miR-210-5p, miR-26a-5p, miR-30b, miR-2284h-5p, miR-133a-3p, miR-33b-3p, miR-142-3p, miR-378a-3p, miR-193b-5p, miR-378i, miR-191, miR-30c-5p, miR-181c-5p, miR-122-5p, miR-6525, miR-214, miR-129-2-3p, miR-3184-3p, miR-454-3p, miR-874-5p, miR-4492, miR-129-5p, novel\_74, miR-3604, miR-2285j, miR-15b-5p, miR-216b-5p, miR-301a-3p, miR-582-5p, miR-216b-3p, miR-504-5p, miR-2331-3p, miR-30c-1-3p, miR-1827, miR-1895, miR-345-5p, miR-411, miR-30d-5p, miR-129b-3p, miR-450a-1-3p, miR-299, miR-503-3p, let-7a-2-3p, miR-432-3p, miR-2284l, miR-432-3p, miR-2285r, miR-668-3p, miR-194a, miR-365b-5p, miR-411-5p, miR-487b-3p, miR-103a-3p, miR-31-5p, miR-2284x, miR-497-5p, miR-16b, miR-450c-3p, miR-542-3p, miR-432, miR-301b-3p, miR-206, miR-6119-3p, miR-142b, miR-4324, miR-144-3p, miR-320c, miR-299b-3p, miR-26b-5p, miR-378f, miR-412-3p, miR-150-5p, miR-1306, miR-450b-5p, miR-3064-5p, miR-200a-3p, miR-127-5p, miR-664-3p, miR-205-5p, miR-486-5p, miR-129-1-3p, miR-450a-1-3p, miR-2284z, miR-134-5p, miR-322-5p, miR-429-3p, miR-299a-3p, miR-30c, miR-330-5p, miR-1290, miR-1260b, miR-193a-5p, miR-16-5p, miR-2284v, miR-134-5p, miR-191-5p, miR-6740-5p, miR-125b-5p, miR-2284k, novel\_63, miR-2433, miR-3956, miR-125a, miR-2355-5p, miR-874-3p, miR-1248, miR-345-5p, miR-301, miR-30e-5p, miR-758-3p, miR-193a, miR-30c-1-3p, miR-33a-5p, miR-424-5p, miR-3955-3p, miR-3085-3p, miR-1306-5p, miR-

miR-24-3p, miR-1307-3p, miR-495-3p, miR-342-3p, miR-335-5p, miR-412-5p, miR-6402, miR-670-3p, miR-411b-3p, miR-320b, miR-655-5p, miR-26b-5p, miR-146b-5p, miR-135b-5p, miR-3970, miR-150-5p, miR-18a-3p, miR-378b, miR-18b, let-7a-2-3p, miR-503-3p, miR-432-3p, miR-432-3p, miR-668-3p, miR-628-5p, miR-378a-5p, miR-105-5p, miR-2411-3p, miR-224-5p, miR-146a, miR-377-3p, miR-544b, miR-2284d, miR-412-5p, miR-340-3p, miR-133b-5p, miR-16-1-3p, miR-1260b, miR-3071-5p, miR-542-3p, miR-323-3p, miR-374a-3p, miR-1260b, miR-6128, miR-3607-3p, miR-374b-3p, miR-331-3p, miR-135a-5p, miR-223-5p, miR-141-3p, miR-503-3p, let-7g-3p, miR-23b, miR-18a, miR-362-5p, miR-30e-5p, miR-1957a, miR-2285b, miR-148b-5p, miR-3064-5p, miR-2385-3p, miR-4286, miR-200a-3p, novel\_127, miR-200c-3p, miR-30c-2-3p, miR-1260a, miR-200c, miR-545-5p, miR-129-1-3p, miR-412, miR-18b-5p, miR-429-3p, miR-200b-3p, miR-105-2, miR-30c, miR-496, let-7a-2-3p, miR-7134-5p, miR-30a-5p, miR-345-3p, miR-1285-5p, miR-362-5p, miR-212-3p, miR-374a-3p, miR-1843a-3p, miR-3968, miR-335, miR-30b-5p, miR-454-5p, miR-7977, miR-3064-5p, miR-139-5p, miR-20a-3p, miR-3963, miR-409-5p, miR-30c-1-3p, let-7c-3p, miR-23a-3p, miR-2330-5p, miR-494-3p, miR-146b, miR-214-3p, miR-3085-3p, miR-25-5p, miR-505, miR-2957, miR-199a-3p, miR-342, novel\_103, miR-9788-3p, miR-148b-5p, miR-500-5p, miR-455-3p, miR-411b-5p, miR-105-1, miR-101c, miR-2426, miR-544a, miR-412-3p, miR-224-5p, miR-214, miR-3184-3p, miR-129-2-3p, miR-874-5p, miR-3604, miR-2285j, novel\_32, miR-151b, miR-377-3p, miR-544-3p, miR-139-5p, miR-552-3p, miR-341-3p, miR-30c-1-3p, miR-496-3p, novel\_99, let-7g-3p, miR-30f, miR-18a-5p, miR-30d-5p, miR-21a-3p, miR-146a-5p, miR-2424, miR-664b-3p, miR-216c-5p, miR-30d, miR-1277-5p, miR-21-3p, miR-412-5p, miR-216a-5p, miR-345-3p, miR-30b, miR-2285p, novel\_17, miR-26a-5p, miR-532-3p, miR-23a-3p, miR-3120-3p, miR-499b-3p, miR-23b-3p, miR-499a-3p, miR-3082-5p

GGNBP2 ENSOARGO( gametoge: 30c, miR-496, let-7a-2-3p, miR-7134-5p, miR-30a-5p, miR-345-3p, miR-1285-5p, miR-362-5p, miR-212-3p, miR-374a-3p, miR-1843a-3p, miR-3968, miR-335, miR-30b-5p, miR-454-5p, miR-7977, miR-3064-5p, miR-139-5p, miR-20a-3p, miR-3963, miR-409-5p, miR-30c-1-3p, let-7c-3p, miR-23a-3p, miR-2330-5p, miR-494-3p, miR-146b, miR-214-3p, miR-3085-3p, miR-25-5p, miR-505, miR-2957, miR-199a-3p, miR-342, novel\_103, miR-9788-3p, miR-148b-5p, miR-500-5p, miR-455-3p, miR-411b-5p, miR-105-1, miR-101c, miR-2426, miR-544a, miR-412-3p, miR-224-5p, miR-214, miR-3184-3p, miR-129-2-3p, miR-874-5p, miR-3604, miR-2285j, novel\_32, miR-151b, miR-377-3p, miR-544-3p, miR-139-5p, miR-552-3p, miR-341-3p, miR-30c-1-3p, miR-496-3p, novel\_99, let-7g-3p, miR-30f, miR-18a-5p, miR-30d-5p, miR-21a-3p, miR-146a-5p, miR-2424, miR-664b-3p, miR-216c-5p, miR-30d, miR-1277-5p, miR-21-3p, miR-412-5p, miR-216a-5p, miR-345-3p, miR-30b, miR-2285p, novel\_17, miR-26a-5p, miR-532-3p, miR-23a-3p, miR-3120-3p, miR-499b-3p, miR-23b-3p, miR-499a-3p, miR-3082-5p

SLC06A1 ENSOARGO( solute c:

miR-669, miR-320b, miR-3074-5p, miR-146b-5p, miR-639b, miR-195a-5p, miR-1291, miR-450b-3p, miR-107, miR-150-5p, miR-216a-3p, miR-18a-3p, miR-18b, miR-2387, miR-758-5p, novel\_101, miR-342-3p, miR-6123, miR-147-5p, miR-92a-3p, miR-16a, miR-15a, miR-4324, miR-28c, miR-194-3p, miR-149-5p, miR-103, miR-2355-3p, miR-2285g, miR-3431, miR-185-5p, miR-187-3p, miR-103a-3p, miR-497-5p, miR-2889, miR-138, miR-16b, miR-3071-5p, novel\_23, miR-145a-5p, miR-708-3p, miR-1843b-5p, miR-542-3p, miR-432-3p, miR-22841, miR-628-5p, miR-380-5p, miR-660, miR-483-3p, miR-32, novel\_51, miR-146a, miR-25-3p, miR-370-3p, miR-2285aa, miR-2355-5p, miR-141-3p, miR-1271, miR-487a-3p, miR-671-5p, miR-18a, miR-488-3p, miR-331-5p, miR-2448-3p, miR-145-3p, miR-16-5p, miR-1306-5p, miR-410-3p, miR-28-5p, miR-134-5p, miR-486b-3p, miR-138-5p, miR-331-5p, novel\_63, miR-134-5p, miR-322-5p, miR-758-5p, miR-483-3p, miR-6516-5p, miR-1224-5p, miR-7641, miR-18b-5p, miR-128-3p, miR-582-3p, miR-134, miR-3065-3p, miR-1271-3p, miR-92b-3p, miR-380-5p, miR-28b, miR-3064-5p, miR-4286, miR-107, miR-200a-3p, novel\_127, miR-92a-3p, miR-30c-2-3p, miR-30f, miR-2285af, miR-125a-3p, miR-3082-5p, miR-2483-3p, miR-3064-5p, miR-452-3p, miR-9-3p, novel\_94, miR-381-3p, miR-361-3p, miR-9-3p, miR-154a, miR-361-3p, miR-6527, miR-3059-5p, miR-2447, miR-363-3p, miR-7134-3p, miR-490-5p, miR-154-3p, miR-371a-5p, miR-2440, miR-9788-3p, miR-216a-3p, miR-2285e, miR-421, miR-147a, miR-145b, miR-1343-3p, miR-296-5p, miR-484, miR-8485, miR-30c-1-3p, miR-424-5p, miR-382-3p, miR-494-3p, miR-146b, miR-214-3p, miR-3085-3p, miR-2957, miR-505, miR-16b, miR-342, novel\_103, miR-204-3p, miR-15b-5p, miR-27a-5p, miR-6130, miR-154a-3p, miR-21-3p, miR-3065-3p, miR-30c-1-3p, miR-32-5p, miR-660-5p, miR-625-5p, miR-186-5p, miR-18a-5p, miR-129b-3p, miR-2285c, miR-122-5p, miR-214, miR-529-5p, miR-122-3p, miR-466f-3p, miR-8485, miR-212-3p

AURKA ENSOARGO(aurora k miR-21c, miR-378j, miR-6516-3p, miR-186-5p, miR-7144-5p, miR-329a, miR-10b-3p, miR-215-5p, miR-139-5p, miR-139-5p, miR-216b-5p, miR-670-3p, miR-192-5p, miR-582-5p, miR-576-3p, miR-218-5p, miR-130b-5p, miR-190a-5p, novel\_1, miR-664a, miR-6516-3p, miR-4726-5p, miR-190b-5p, miR-1839-3p, miR-326-3p, miR-145-3p, novel\_111, miR-6525, miR-323-3p, novel\_23, miR-330-5p, miR-218-2-3p, miR-362-3p, miR-215-5p, miR-1434-3p, miR-196a-5p, miR-329-3p, miR-2426, miR-101a-5p, miR-362-3p, miR-21-5p, miR-3600, miR-2300a-5p, miR-548w, miR-362-3p, miR-190a, miR-2285p, miR-326, miR-106b-3p, miR-196b-5p, miR-101-5p, miR-1839-3p, miR-130b-5p, miR-491-3p, miR-8485, miR-148b-5p

HMGXB4 ENSOARGO(HMG box miR-145-3p, novel\_111, miR-6525, miR-323-3p, novel\_23, miR-330-5p, miR-218-2-3p, miR-362-3p, miR-215-5p, miR-1434-3p, miR-196a-5p, miR-329-3p, miR-2426, miR-101a-5p, miR-362-3p, miR-21-5p, miR-3600, miR-2300a-5p, miR-548w, miR-362-3p, miR-190a, miR-2285p, miR-326, miR-106b-3p, miR-196b-5p, miR-101-5p, miR-1839-3p, miR-130b-5p, miR-491-3p, miR-8485, miR-148b-5p

FAM3C ENSOARGO(family w

miR-424-3p, miR-3154, miR-23a-5p, miR-7144-5p, miR-671-5p, miR-574-5p, miR-487a-3p, miR-370-3p, miR-2355-5p, miR-1271, miR-199a-5p, miR-409-3p, miR-134-5p, miR-486b-3p, miR-16-5p, miR-3607-3p, miR-1260b, miR-134, miR-1343-5p, miR-23b-5p, miR-330-5p, let-7a-2-3p, miR-322-5p, miR-134-5p, miR-582-3p, miR-129-1-3p, miR-214-5p, miR-2285af, miR-1260a, novel\_127, novel\_96, miR-1, miR-199a-5p, novel\_39, miR-490-3p, miR-18a-3p, miR-195a-5p, novel\_68, miR-3120-3p, miR-146b-3p, miR-670-3p, miR-15a, miR-142b, miR-16a, novel\_87, miR-6119-3p, miR-206, miR-342-3p, miR-326-3p, miR-2428, miR-199b-5p, miR-873a-5p, miR-653, miR-30b-3p, miR-16b, miR-1260b, miR-497-5p, miR-3955-5p, miR-185-5p, miR-377-3p, miR-330-3p, novel\_51, miR-1343-5p, miR-6240, miR-493-5p, miR-363-5p, miR-628-5p, miR-432-3p, let-7a-2-3p, miR-154b-3p, miR-1827, miR-2331-3p, miR-1277-3p, miR-154a-3p, miR-377-3p, miR-216b-5p, miR-15b-5p, miR-665, miR-424-5p, miR-4492, miR-129-2-3p, miR-214, miR-206-3p, miR-3184-5p, miR-122-5p, miR-6134, miR-2366, miR-193b-5p, miR-124-3p, miR-1197-5p, miR-18a-3p, miR-1b-3p, miR-212-5p, miR-485-3p, miR-210-3p, miR-487a-3p, miR-15a-5p, miR-532-3p, miR-324-3p, miR-185-3p, miR-30b-3p, miR-216c-5p, miR-487a, miR-345-3p, miR-486-3p, miR-143-3p, miR-199b-5p, miR-493-5p, miR-4443, miR-154-3p, miR-2284q, miR-3059-5p, miR-361-3p, miR-423-5p, miR-1a-3p, miR-30b-3p, miR-2426, miR-1343-3p, miR-330-3p, novel\_4, miR-1298-3p, miR-9788-3p, miR-342, miR-326, miR-16b, miR-1185-5p, miR-491-5p, miR-199b-5p, miR-214-3p, miR-1388-3p, miR-124a, miR-424-5p, miR-23a-3p, miR-3187-3p, miR-483-3p, novel\_79, miR-2285ad, miR-142-3p, miR-184-3p, miR-5703, miR-2904, miR-362-3p, miR-193b-5p, novel\_133, miR-486-3p, miR-421-5p, miR-181a-2-3p, miR-1, miR-3064-5p, miR-503-5p, miR-543-5p, miR-17-3p, miR-339a, miR-125b, miR-185-3p, miR-204-3p, miR-125a, miR-339b, miR-329a, miR-6134, miR-206-3p, miR-3184-3p, miR-486b-3p, miR-4492, miR-664a, miR-17-3p, miR-320e, miR-125b-5p, novel\_63, miR-2459, miR-216a-3p, miR-185-5p, miR-134-3p, miR-503-5p, miR-1298-3p, miR-432-5p, miR-339-5p, miR-2426, miR-362-3p, miR-1a-3p, miR-223-3p, miR-541, miR-432, miR-329-3p, let-7f-2-3p, let-7f-2-3p, miR-1388-3p, miR-125a-5p, miR-483-3p, miR-3085-3p, miR-362-3p, miR-503-5p, miR-1185-2-3p, novel\_69, miR-378g, miR-499b-5p, miR-3064-5p, miR-136-5p, miR-378j, miR-2428, miR-24-3p, miR-17-3p, miR-541-3p, miR-2447, miR-206

DHX58 ENSOARGO( DEXH (As:

SCARB1 ENSOARGO( scavenge:



miR-125a-5p, miR-483-3p, miR-106a-5p, novel\_51, miR-17-5p, miR-296-3p, miR-296-3p, miR-2483-5p, miR-497-5p, miR-138, miR-16b, miR-1260b, miR-22-3p, miR-432, miR-1434-3p, miR-149-5p, miR-194-3p, miR-103, miR-544b, miR-20b, miR-432-5p, miR-3431, miR-377-5p, miR-31-5p, miR-103a-3p, miR-133b-5p, miR-656-5p, miR-16a, miR-15a, miR-502-5p, miR-20a-5p, miR-6529b, miR-211, miR-371b-3p, miR-17-3p, miR-7975, miR-379-5p, miR-195a-5p, miR-1291, miR-107, miR-1306, miR-150-5p, miR-378b, miR-18b, miR-320c, miR-669, miR-323a-5p, miR-2404, novel\_69, miR-299b-3p, miR-26b-5p, novel\_68, miR-378b, miR-107, miR-543-5p, miR-450a-2-3p, miR-17-3p, miR-2898, miR-200c-3p, miR-1260a, miR-200c, novel\_39, miR-1271-3p, miR-3064-5p, miR-200b-3p, miR-214-5p, miR-322-5p, miR-483-3p, miR-1271-5p, miR-18b-5p, miR-299a-3p, miR-6517, miR-429-3p, miR-204-5p, miR-486b-3p, miR-138-5p, miR-125b-5p, miR-6740-5p, miR-34c-3p, miR-93, miR-1260b, miR-6128, miR-16-5p, miR-103b, miR-20b-5p, miR-485-5p, miR-671-5p, miR-10b-3p, miR-93-5p, miR-18a, miR-320a, miR-23b, miR-17-5p, miR-3154, miR-2285aa, miR-542-5p, miR-2355-5p, miR-1271, miR-3956, miR-125a, miR-214-3p, miR-1185-5p, miR-3085-3p, miR-106b-5p, miR-16b, miR-320b, miR-1306-5p, miR-23a-3p, miR-33a-5p, miR-106a-5p, miR-424-5p, miR-3120-5p, miR-544a, miR-2284r, miR-296-5p, miR-541, miR-143-5p, miR-9788-3p, novel\_4, miR-4726-5p, miR-423-5p, miR-541-3p, miR-877-3p, miR-3963, miR-96-5p, miR-504, miR-361-3p, miR-4443, miR-3082-5p, miR-211-5p, miR-4792, miR-3064-5p, miR-20a-3p, miR-452-3p, miR-30b-3p, miR-299-3p, miR-320d, miR-106a, miR-324-3p, miR-92a-1-5p, miR-125b, miR-185-3p, miR-26a-5p, miR-486-3p, miR-376a-5p, miR-130a-5p, miR-377-5p, miR-20a, miR-345-3p, miR-4429, miR-941, miR-1197-5p, miR-5703, novel\_133, miR-193b-5p, miR-2300b-3p, miR-532-3p, miR-151-5p, miR-23b-3p, miR-3607-3p, miR-193a-5p, miR-665-5p, miR-214, let-7b, miR-4510, miR-145a-3p, let-7b-5p, miR-3184-5p, miR-331-3p, miR-665, miR-2433, let-7f, miR-4492, miR-138-5p, miR-3065-3p, miR-370-3p, miR-874-3p, let-7i-5p, miR-6130, miR-30d-5p, miR-30e-5p, miR-488-3p, miR-885-3p, miR-329a, miR-3064-5p, let-7g, miR-3065-3p, miR-30f, miR-185-3p, let-7c-5p, miR-2397-5p, miR-30d, let-7k, miR-2898, let-7f-5p, miR-191-3p, miR-98-5p, miR-431, miR-3960, miR-124-3p, miR-30a-5p, miR-1197-5p, miR-1961, miR-362-3p, miR-2300b-3p, miR-193b-5p, miR-16-1-3p, miR-885-3p, let-7d, miR-495-3p, miR-541-3p, miR-423-5p, miR-361-3p, let-7i, miR-4726-5p, miR-3064-5p, miR-10b, let-7d-5p, miR-378g, miR-3141, let-7e-5p, miR-363-5p, miR-124a, let-7a-5p, miR-8485, miR-3141, miR-362-3p, miR-5126, miR-431-5p, miR-214-3p, let-7e, miR-3085-3p, miR-1343-3p, miR-149-5p, let-7g-5p, miR-134-3p, miR-30b-3p, miR-125b-2-3p, miR-329-3p, miR-541, miR-4508, miR-744-5p, miR-138, miR-30b-3p, miR-362-3p, miR-16-1-3p

miR-299a-5p, miR-2426, miR-30b-3p, miR-412-3p, miR-143-5p, miR-484, miR-296-5p, miR-2285e, miR-500-5p, miR-9788-3p, miR-222-5p, miR-105-1, let-7e, miR-542-5p, miR-3085-3p, novel\_103, miR-326, miR-342, miR-4532, miR-30c-1-3p, miR-424-5p, let-7a-5p, miR-147-3p, miR-199b-5p, miR-361-3p, miR-454-5p, let-7d-5p, miR-489, miR-499b-5p, miR-10b, miR-3064-5p, miR-335, miR-4726-5p, miR-362-5p, miR-1296-5p, miR-541-3p, miR-378d, miR-5703, miR-1197-5p, miR-188-3p, miR-2904, miR-2408, miR-532-3p, miR-148b-3p, miR-15a-5p, miR-487a-3p, miR-3600, miR-1b-3p, miR-548e-3p, miR-299-3p, miR-21-3p, miR-34b-5p, miR-760-3p, miR-125b, miR-185-3p, miR-216a-5p, miR-542-5p, miR-2411, miR-125b-2-3p, miR-29b-1-5p, miR-2887, miR-183-5p, miR-18a-5p, miR-154b-3p, novel\_32, miR-22-3p, miR-204-3p, miR-323-5p, miR-6130, miR-6516, miR-708-5p, miR-424-5p, miR-664a, miR-450b-3p, miR-320e, miR-324-3p, miR-19b-1-5p, miR-132-5p, let-7b-5p, miR-206-3p, miR-145a-3p, miR-4510, miR-744-5p, miR-2889, miR-1260b, miR-30b-3p, miR-1434-3p, miR-873a-5p, miR-103, miR-185-5p, let-7g-5p, miR-2285g, miR-187-3p, miR-125a-5p, miR-1343-5p, miR-124-5p, miR-197-5p, miR-539-3p, miR-296-3p, miR-654-3p, miR-6395, miR-195a-5p, miR-9851-3p, miR-107, miR-1291, miR-378b, miR-18b, miR-34b, miR-323a-5p, miR-320b, miR-147-5p, miR-199c, let-7i, miR-16a, miR-34c, miR-15a, miR-2428, miR-326-3p, miR-449a, miR-1307-3p, miR-24-3p, novel\_101, miR-542-5p, miR-342-3p, let-7d, miR-300, miR-134, miR-214-5p, miR-582-3p, miR-483-3p, miR-2411-5p, miR-6516-5p, miR-24-2-5p, miR-543-5p, miR-107, let-7c-5p, miR-30c-2-3p, miR-1260a, miR-1271-3p, miR-199a-5p, miR-4286, miR-30a-3p, miR-671-5p, miR-18a, miR-362-5p, miR-3154, miR-381-3p, miR-199a-5p, miR-324-5p, miR-34c-5p, miR-615-5p, miR-487a-3p, miR-28-5p, miR-486b-3p, miR-767-5p, miR-321-3p, miR-365a-5p, miR-1839-5p, miR-541, miR-500-5p, miR-203-3p, miR-2285aa, miR-7977, miR-3120-3p, miR-20a-3p, miR-16-1-3p, novel\_94, novel\_99, miR-3120-5p, miR-2284x, miR-16-1-3p, miR-197-3p, miR-217-5p, miR-362-5p, miR-3065-5p, miR-140-3p, miR-2428, miR-143-3p, miR-362-5p, miR-500b-5p, novel\_111, miR-6128, miR-345-3p, miR-1388-3p, novel\_74, miR-217

CCNF

ENSOARGO(cyclin F

NRP2

ENSOARGO(neuropil

miR-22-5p, miR-203b-5p, miR-206, miR-33a-3p, miR-16a, miR-15a, miR-199b-5p, miR-2284w, miR-2428, miR-374c-5p, novel\_101, miR-195a-5p, miR-19a-3p, miR-1306, miR-181b-3p, miR-669, miR-677, miR-329-5p, miR-3074-5p, miR-466f-3p, miR-2411-3p, novel\_51, miR-197-5p, miR-503-3p, miR-345-5p, miR-432-3p, miR-432-3p, let-7f-2-3p, let-7f-2-3p, miR-130b-5p, miR-744-5p, miR-497-5p, miR-219a-1-3p, miR-16b, miR-30b-3p, miR-2284ab, miR-19b-2-5p, novel\_116, miR-665, miR-486b-3p, miR-28-5p, novel\_9, miR-409-3p, miR-3969, miR-99b-3p, miR-181c-3p, miR-145-3p, miR-16-5p, miR-2284v, miR-1248, miR-345-5p, miR-320a, miR-199a-5p, miR-3965, miR-99a-3p, miR-574-5p, miR-200c-3p, miR-191-3p, miR-181c-3p, miR-200c, miR-125a-3p, miR-192-3p, miR-199a-5p, novel\_39, miR-29a-5p, miR-1, miR-29b-2-5p, miR-3064-5p, miR-200b-3p, miR-3591-5p, miR-345-3p, novel\_121, miR-322-5p, miR-429-3p, miR-1843a-3p, miR-2285t, miR-301a-5p, miR-382-3p, miR-877-3p, miR-541-3p, miR-212-3p, miR-3059-5p, miR-9-3p, miR-335-3p, miR-181a-3p, miR-129b-5p, miR-378j, miR-199b-5p, miR-361-3p, miR-203-3p, miR-126b-5p, miR-7689-3p, miR-3064-5p, miR-214-3p, miR-199b-5p, miR-3955-3p, miR-3085-3p, miR-16b, miR-505, miR-29b-1-5p, miR-1306-5p, novel\_115, miR-320b, miR-424-5p, miR-2426, miR-1388-5p, miR-30b-3p, miR-1a-3p, miR-541, miR-301b-5p, miR-6529a, miR-9788-3p, miR-455-3p, miR-222-5p, miR-181b-2-3p, novel\_78, miR-1343-3p, miR-130b-5p, miR-424-5p, miR-874-5p, miR-708-5p, miR-664a-5p, miR-655-3p, miR-29b-2-5p, miR-19b-1-5p, miR-206-3p, miR-6525, miR-214, miR-145a-3p, miR-3074-5p, novel\_99, miR-582-5p, miR-186-5p, miR-345-5p, miR-655, miR-877-5p, miR-151b, miR-15b-5p, miR-582-5p, miR-216b-3p, miR-99a-3p, miR-2284m, miR-185-3p, miR-345-3p, miR-500a-5p, miR-486-3p, miR-181b-1-3p, miR-664b-3p, miR-29b-1-5p, miR-345-3p, miR-329a-5p, miR-4429, miR-19b-3p, miR-5703, miR-

miR-329-5p, miR-655-5p, miR-323a-5p, miR-181b-3p, miR-320c, miR-677, miR-148a-3p, miR-2387, miR-18a-3p, miR-3591-3p, miR-1306, novel\_101, miR-199b-5p, miR-2284w, miR-2428, miR-326-3p, miR-576-3p, miR-4324, miR-485-3p, miR-379-3p, miR-22-5p, miR-133b-5p, miR-149-5p, miR-181a-5p, miR-542-3p, miR-1434-3p, miR-194-5p, miR-145a-5p, miR-219a-1-3p, miR-30b-3p, miR-2284ab, let-7f-2-3p, let-7f-2-3p, miR-432-3p, miR-654-3p, miR-432-3p, miR-345-5p, miR-539-3p, miR-377-3p, miR-194a, miR-378a-5p, miR-300-3p, miR-376c-3p, miR-133c, miR-199a-5p, miR-381-3p, miR-30e-5p, miR-3154, miR-23b, miR-320a, miR-345-5p, miR-1248, miR-7144-5p, miR-28a-3p, miR-133a-3p, miR-6128, miR-374a-3p, miR-145-3p, miR-494-5p, miR-409-3p, miR-331-3p, novel\_9, miR-486b-3p, miR-222, miR-7641, miR-9-5p, novel\_121, miR-2284z, miR-330-5p, miR-23b-5p, miR-30a-5p, miR-300, miR-411-3p, miR-2285b, miR-199a-5p, miR-219-3p, miR-125a-3p, miR-6119-5p, miR-2285af, miR-181b-5p, miR-28-3p, novel\_127, miR-152-3p, miR-3082-5p, miR-3596, miR-1185-2-3p, miR-221, miR-199b-5p, miR-544-5p, miR-9-3p, miR-3956-3p, miR-885-5p, miR-212-3p, novel\_60, miR-2447, miR-3059-5p, miR-194b-5p, miR-9-5p, miR-181d-5p, miR-452-5p, miR-877-3p, miR-219a-2-3p, miR-154a, miR-218-5p, miR-382-3p, miR-2284q, miR-548w, miR-145b, miR-181b-2-3p, miR-142-3p, miR-142-5p, miR-1185-3p, miR-221-3p, miR-9788-3p, miR-216a-3p, miR-143-5p, miR-2284r, miR-6529a, miR-30b-3p, miR-758-3p, miR-7857, miR-2284aa, miR-101c, miR-494-3p, miR-124a, miR-23a-3p, miR-758-3p, miR-8485, miR-326, miR-1306-5p, miR-320b, miR-182-5p, miR-199b-5p, miR-182-5p, miR-21-3p, miR-216b-5p, miR-323-5p, miR-151b, miR-204-3p, miR-21a-3p, miR-30d-5p, miR-411, miR-487b-5p, miR-433-3p, miR-345-5p, let-7g-3p, miR-133b-3p, novel\_99, miR-1827, miR-3184-3p, miR-539-5p, miR-142a-5p, miR-181c-5p, miR-222-3p, miR-338-5p, miR-665, miR-219b-5p, miR-1271-3p, miR-326-3p, miR-670-3p, miR-335-5p, miR-2300a-5p, miR-335, miR-330-5p, miR-326

MAGT1 ENSOARGO(magnesium)

F13A1 ENSOARGO(coagulation)

miR-708-3p, miR-873a-5p, miR-19b-2-5p, miR-542-3p, miR-181a-5p, novel\_23, miR-380-3p, miR-2284ab, miR-4508, miR-744-5p, miR-188-5p, miR-3955-5p, miR-133b-5p, miR-130a-3p, miR-339-5p, miR-26b-3p, miR-3431, miR-149-5p, miR-224-5p, miR-146a, miR-296-3p, miR-330-3p, novel\_51, miR-378a-5p, miR-660, miR-130b-5p, miR-6240, miR-101-5p, miR-628-5p, miR-432-3p, miR-296-3p, let-7j, miR-345-5p, miR-148a-3p, miR-376b-3p, miR-216a-3p, miR-3591-3p, miR-412-3p, miR-19a-3p, miR-146b-5p, miR-7975, miR-3074-5p, miR-2404, miR-299b-3p, miR-670-3p, miR-320c, miR-502-5p, miR-379-3p, miR-22-5p, miR-136-3p, miR-2285x, miR-211, miR-323c, miR-371b-3p, miR-2284w, miR-301b-3p, miR-1290, miR-411-3p, miR-128-3p, miR-496, miR-299a-3p, miR-6517, miR-429-3p, novel\_79, miR-302a-5p, miR-24-2-5p, miR-6516-5p, miR-1271-5p, novel\_121, miR-214-5p, miR-376b-3p, miR-200c, miR-30f, miR-339a, miR-450a-2-3p, miR-127-5p, miR-200c-3p, miR-152-3p, miR-3529-3p, miR-24-2-5p, miR-29a-5p, miR-2285b, miR-503-3p, miR-301, miR-200a-5p, miR-320a, miR-345-5p, miR-503-3p, miR-376c-3p, miR-2284k, miR-204-5p, miR-3607-3p, miR-193a-5p, miR-323-3p, miR-125b-2-3p, miR-758-3p, miR-101a-5p, miR-21b, miR-3120-5p, miR-1343-3p, novel\_78, miR-330-3p, miR-153, miR-376b-3p, miR-455-3p, miR-216a-3p, miR-421, miR-320b, miR-29b-1-5p, miR-182-5p, miR-130b-3p, miR-146b, miR-153-3p, miR-1388-3p, miR-744-3p, miR-758-3p, miR-96-5p, miR-376a-3p, miR-877-3p, miR-1983, miR-24-1-5p, miR-20a-3p, miR-2319b, miR-211-5p, miR-7857-3p, miR-376d, miR-371a-5p, miR-3059-5p, miR-452-5p, novel\_133, miR-1246, miR-1193, miR-188-3p, miR-1434-5p, miR-140-3p, miR-19b-3p, novel\_73, miR-4429, miR-218-1-3p, miR-3600, miR-7859, miR-148b-3p, miR-532-3p, miR-2284h-5p, miR-219b-5p, miR-216a-5p, miR-320d, miR-3653-3p, miR-30b-3p, miR-200-3p, miR-2285w, miR-20b-1-5p, miR-664b-3p, miR-

miR-484, miR-412-3p, miR-758-3p, miR-30b-3p, miR-450b-5p, miR-2284aa, novel\_4, miR-409b, miR-181b-2-3p, miR-539-5p, miR-455-3p, miR-148b-5p, miR-2459, miR-1306-5p, miR-3085-3p, miR-103a-2-5p, miR-1388-3p, miR-33a-5p, miR-3187-3p, miR-2310, miR-129b-5p, miR-335-3p, miR-544-5p, miR-877-3p, miR-3064-5p, miR-24-1-5p, miR-139-5p, miR-20a-3p, miR-489, miR-203-3p, miR-107-5p, miR-2285t, miR-2447, miR-212-3p, miR-2284j, miR-1197-5p, miR-16-1-3p, miR-378d, miR-148a-5p, miR-30d-3p, miR-148b-3p, miR-340-5p, miR-328-3p, miR-196a-3p, miR-208b-3p, miR-2284m, miR-466i-5p, miR-30b-3p, miR-3653-3p, miR-216c-5p, miR-345-3p, miR-143-3p, miR-299, miR-433-3p, novel\_99, miR-186-5p, miR-140-5p, miR-496-3p, miR-660-5p, miR-139-5p, miR-6130, miR-204-3p, miR-30e-3p, miR-30a-3p, miR-3604, miR-320e, miR-6516-3p, miR-17-3p, miR-669a-3p, miR-539-5p, miR-4510, miR-129-2-3p, miR-6525, miR-432, miR-7b-5p, miR-542-3p, miR-1843b-5p, miR-197-3p, miR-138, miR-30b-3p, miR-380-3p, miR-2284ab, miR-16-1-3p, miR-2284d, miR-432-5p, miR-3431, miR-185-5p, miR-7-5p, miR-452-5p, miR-660, miR-466f-3p, miR-382, miR-628-5p, miR-148a-3p, miR-1306, miR-2284e, miR-6395, miR-7-1-3p, miR-411b-3p, miR-374c-3p, miR-677, miR-181b-3p, miR-208a-3p, miR-382-5p, novel\_1, miR-22-5p, miR-502b, miR-1a-1-5p, miR-17-3p, miR-24-3p, miR-496, miR-412, miR-7641, miR-2284z, miR-129-1-3p, miR-8117, miR-17-3p, miR-1a-2-5p, miR-543-5p, miR-152-3p, miR-3064-5p, miR-30a-3p, miR-24-2-5p, miR-200a, miR-1957a, miR-488-3p, miR-10b-3p, miR-1814c, miR-503-3p, miR-374c-3p, miR-154b-5p, miR-2284n, miR-2284k, miR-1-5p, miR-331-3p, miR-138-5p, miR-2284v, miR-6128, miR-145-3p, miR-376c-3p, miR-204-3p, miR-139-5p, miR-582-5p, miR-376e-3p, miR-552-3p, miR-21-3p, miR-660-5p, miR-543-3p, miR-1895, let-7g-3p, miR-133b-3p, miR-23b, miR-3154, miR-362-5p, miR-500a-3p, miR-3613-5p, miR-181c-5p, miR-500b-5p, miR-6525, miR-133a-3p, miR-2284v, miR-130b-5p, miR-500, miR-31-3p, miR-664a, miR-338-5p, miR-2284k, miR-545-5p, miR-2284h-5p, miR-23b-3p, let-7a-2-3p, miR-361-5p, miR-2284u, miR-664-5p, miR-218-1-3p, miR-140-3p, miR-2427, miR-2300b-3p, miR-376a-5p, miR-2284a, miR-200a, miR-2284y, miR-130a-5p, miR-376c-3p, miR-148b-5p, miR-664b-3p, miR-2284f, miR-195a-3p, miR-2285w, miR-3529-3p, miR-2484, miR-1277-5p, miR-181b-5p, miR-450a-2-3p, miR-2284m, miR-500a-5p, miR-2285p, miR-376b-3p, miR-2285af, miR-376d, miR-669, miR-6535, miR-411b-3p, miR-139-5p, miR-2284g, miR-9-3p, miR-1983, miR-376a-3p, miR-2284e, miR-412-3p, miR-376b-3p, miR-3591-3p, miR-7705, miR-2428, novel\_27, miR-9-3p, miR-362-5p, miR-194b-5p, miR-2285x, miR-181d-5p, miR-2284j, miR-335-5p, novel\_120, miR-2447, miR-335, miR-2284o, miR-142b, miR-6402, miR-502-5p, miR-3613, miR-218-5p, miR-421, miR-500-5p, miR-376b-3p, miR-2284d, miR-432-5p, miR-412-5p, miR-548w, miR-133b-5p, miR-7862, miR-16-2-3p, miR-101a-5p, miR-2284ab, miR-3071-5p, miR-194-5p, miR-197-3p, miR-181a-5p, miR-1434-3p, miR-432, let-7a-2-3p, miR-2284b, miR-23a-3p, miR-668-3p, miR-130b-5p, miR-466f-3p, miR-660, miR-194a

miR-331-5p, miR-204-5p, novel\_63, miR-410-5p, miR-331-3p, miR-1260b, miR-876-3p, miR-485-5p, miR-2448-3p, miR-331-5p, miR-30e-5p, miR-488-3p, miR-23b, miR-137-3p, miR-154b-5p, miR-874-3p, miR-370-3p, miR-2285aa, miR-2355-5p, miR-191-3p, miR-450a-2-3p, novel\_96, miR-543-5p, novel\_127, miR-1260a, miR-339a, miR-30f, novel\_39, miR-181a-2-3p, miR-3064-5p, miR-10a-5p, miR-30c, miR-105-2, miR-3578, miR-1290, miR-330-5p, miR-30a-5p, miR-23b-5p, miR-1343-5p, miR-505-5p, miR-214-5p, miR-129-1-3p, miR-582-3p, miR-545-5p, miR-2285ad, miR-412, novel\_79, miR-128-1-5p, miR-502b, miR-147-5p, miR-502-5p, miR-24-3p, miR-211, miR-2284w, miR-2285m, miR-326-3p, miR-412-3p, miR-3141, miR-2285ab, miR-3065-5p, miR-18a-3p, novel\_69, miR-181b-3p, miR-677, miR-6535, novel\_68, miR-10a-5p, miR-1343-5p, miR-455-5p, miR-105-5p, miR-197-5p, miR-3141, miR-654-3p, miR-6412, let-7j, miR-493-5p, miR-1260b, miR-3432b, miR-30b-3p, miR-744-5p, miR-455-5p, miR-2284x, miR-1285, miR-134-3p, miR-185-5p, miR-2285g, miR-2355-3p, novel\_116, miR-187-3p, miR-377-5p, miR-339-5p, miR-664a, miR-874-5p, miR-4492, miR-2285j, miR-665, miR-324-3p, miR-346, miR-10b-5p, miR-3184-5p, miR-4510, miR-129-2-3p, miR-665-5p, miR-214, miR-30f, miR-339b, miR-2312, miR-186-5p, miR-2285c, miR-30d-5p, miR-6130, miR-216b-5p, miR-10a, miR-2331-3p, miR-140-5p, novel\_107, miR-466i-5p, miR-760-3p, miR-21-3p, miR-30d, novel\_17, miR-2285p, miR-196a-3p, miR-30b, miR-92a-1-5p, miR-185-3p, miR-324-3p, miR-377-5p, miR-181b-1-3p, miR-216c-5p, miR-2887, miR-142-3p, miR-378d, miR-2408, novel\_133, miR-30c-5p, miR-5703, miR-23c, miR-23b-3p, miR-532-3p, miR-2284h-5p, miR-18a-3p, miR-3960, miR-212-5p, miR-3968, miR-4726-5p, miR-2284q, miR-2285n, novel\_82, miR-30b-5p, miR-301a-5p, miR-2285y, novel\_111, miR-361-3p, miR-877-3p, miR-422-5p, miR-541-3p, miR-305a-5p, miR-2285f, miR-2447, miR-9-5p, miR-214, miR-877-3p, miR-8095, miR-107-5p, miR-656-5p, miR-1271, miR-541-5p, miR-411b-3p, miR-544-3p, miR-377-3p, miR-1185-2-3p, miR-376c-3p, miR-204-3p, miR-133c, miR-1306, miR-450b-3p, miR-376c-3p, miR-5126, miR-377-3p, miR-1306-5p, miR-25-5p, miR-103a-2-5p, miR-214-3p, miR-9-5p, miR-1185-3p, miR-1247-5p, miR-143-5p, miR-6529a, miR-544a, miR-142-3p

miR-21b, miR-1388-5p, miR-145b, miR-330-3p, miR-148b-5p, miR-455-3p, miR-1185-3p, miR-147a, miR-16b, miR-182-5p, miR-214-3p, miR-130b-3p, miR-2284b, miR-2310, miR-378j, miR-335-3p, miR-493-5p, miR-136-5p, miR-211-5p, miR-139-5p, miR-2284g, miR-1185-2-3p, miR-2440, miR-499a-5p, miR-6527, miR-190b-5p, miR-2447, miR-3956-3p, miR-877-3p, novel\_111, miR-1434-5p, miR-193b-5p, miR-34a-5p, miR-148a-5p, miR-2284u, miR-142-3p, miR-500a-5p, miR-324-3p, miR-210-5p, miR-195a-3p, miR-345-3p, miR-329a-5p, miR-2424, miR-376a-5p, miR-664b-3p, miR-129b-3p, miR-500a-3p, miR-433-3p, miR-625-5p, miR-1827, miR-345-5p, miR-2331-3p, miR-548o-3p, miR-15b-5p, miR-2284s, miR-301a-3p, miR-151-3p, miR-30a-3p, miR-3604, miR-665, miR-2285j, miR-30e-3p, miR-500, miR-454-3p, miR-874-5p, miR-129-5p, miR-190a-5p, miR-130b-5p, miR-214, miR-181c-5p, miR-22-3p, miR-1843b-5p, miR-497-5p, miR-188-5p, miR-16b, miR-31-5p, miR-340-3p, miR-149-5p, miR-3535, miR-378a-5p, let-7f-2-3p, let-7f-2-3p, miR-493-5p, miR-6240, let-7j, miR-1306, miR-376b-5p, miR-148a-3p, miR-2319a, miR-329-5p, miR-669, miR-299b-3p, miR-485-3p, novel\_87, miR-576-3p, miR-625-3p, miR-301b-3p, miR-2284w, miR-23b-5p, miR-330-5p, miR-1290, miR-2285ad, miR-299a-3p, miR-6517, miR-429-3p, miR-2284z, miR-505-5p, miR-322-5p, miR-30f, miR-152-3p, miR-200a-3p, miR-3064-5p, miR-2284y, novel\_39, miR-200a, miR-450c-5p, miR-450b-5p, miR-376c-5p, miR-1248, miR-2474, miR-876-3p, miR-345-5p, miR-1271, miR-100-3p, novel\_9, miR-16-5p, miR-1260b, miR-7857, miR-484, miR-296-5p, miR-4791, miR-2284aa, miR-151a-3p, miR-9788-3p, miR-2320-3p, miR-326, miR-1306-5p, miR-3085-3p, miR-3955-3p, miR-33a-5p, miR-652-5p, miR-424-5p, miR-491-3p, miR-361-3p, miR-877-3p, novel\_94, miR-7977, miR-3064-5p, miR-20a-3p, miR-452-3p, miR-1973, miR-4726-5p, miR-450a-5p, miR-452-5p, miR-181d-5p, novel\_60, miR-3050-5p, miR-



miR-206, miR-48b-3p, miR-576-3p, miR-378f, miR-216a-3p, miR-3970, miR-148a-3p, miR-376b-5p, miR-144-3p, miR-320c, miR-299b-3p, miR-3120-3p, miR-329-5p, novel\_68, miR-378a-5p, miR-194a, novel\_51, miR-32, let-7a-2-3p, miR-6240, miR-27b-3p, miR-188-5p, miR-26a-2-3p, miR-450c-3p, miR-432, miR-194-3p, miR-100-3p, miR-1260b, miR-193a-5p, miR-28a-3p, miR-20b-5p, miR-376c-5p, miR-93-5p, miR-301, miR-30e-5p, miR-133c, miR-25-3p, miR-300-3p, miR-2355-5p, miR-542-5p, miR-2285aa, miR-874-3p, novel\_96, miR-152-3p, miR-28-3p, miR-3071-3p, miR-30f, miR-205-5p, miR-92b-3p, miR-330-5p, miR-23b-5p, miR-129-1-3p, miR-486-5p, miR-450a-1-3p, miR-505-5p, miR-18b-5p, miR-299a-3p, miR-3964, miR-363-3p, miR-2447, miR-544-5p, miR-376a-3p, miR-96-5p, miR-4443, miR-139-5p, miR-4792, miR-214-3p, miR-103a-2-5p, miR-491-5p, miR-106b-5p, miR-29b-1-5p, miR-8485, miR-378d, miR-127-3p, miR-1a-3p, miR-2284r, miR-2459, miR-148b-5p, miR-376b-3p, miR-330-3p, miR-1343-3p, miR-665, let-7b-3p, miR-181c-5p, miR-98-3p, miR-6525, miR-214, miR-129-2-3p, miR-186-5p, miR-543-3p, miR-625-5p, miR-1895, miR-655, miR-450a-1-3p, miR-2284s, miR-582-5p, miR-32-5p, miR-3653-3p, miR-422a, miR-324-3p, miR-500a-5p, miR-664b-3p, miR-195a-3p, miR-369-3p, miR-329a-5p, miR-148a-5p, miR-378a-3p, miR-98-3p, miR-193b-5p, miR-378i, miR-106a, miR-502b, novel\_1, miR-92a-3p, miR-20a-5p, miR-502-5p, miR-326-3p, miR-3959-3p, miR-24-3p, miR-323c, miR-1193, miR-17-3p, miR-376a-2-5p, miR-450b-3p, miR-376b-3p, miR-18b, miR-2285ab, miR-670-3p, miR-2404, miR-146b-3p, miR-320b, miR-378b, miR-17-5p, miR-106a-5p, miR-197-5p, miR-330-3p, miR-539-3p, miR-382, miR-1260b, miR-3071-5p, miR-194-5p, miR-181a-5p, miR-544b, miR-20b, miR-432-5p, miR-26b-3p, miR-144, miR-370-5p, miR-410-5p, miR-145-3p, miR-378c, miR-500b-5p, miR-323-3p, miR-92, miR-133a-3p, miR-376c-5p, miR-23a-5p, let-7a-miR-212-5p, miR-1224-5p, miR-18a-3p, novel\_83, miR-483-3p, miR-5703, miR-330-5p, miR-2904, miR-193b-5p, miR-128-3p, miR-3064-5p, miR-495-5p, miR-2285b, miR-2432, miR-125b-2-3p, miR-185-3p, miR-3601, miR-2397-5p, novel\_127, miR-543-5p, miR-466i-5p, miR-450a-2-3p, miR-874-3p, miR-2331-3p, miR-140-5p, miR-204-3p, miR-214, miR-193a-5p, miR-3184-5p, miR-224-5p, miR-6525, miR-320e, miR-132-5p, miR-6740-5p, miR-324-3p, miR-874-5p, novel\_9, miR-664a, miR-138-5p, miR-9788-3p, miR-216a-3p, miR-134-3p, miR-7857, miR-542-3p, miR-744-5p, miR-7862, miR-455-5p, miR-138, miR-744-3p, miR-363-5p, miR-382-3p, miR-296-3p, miR-654-3p, miR-455-5p, miR-296-3p, miR-326, miR-224-5p, miR-214-3p, miR-106b-3p, miR-3085-3p, miR-483-3p, miR-499b-5p, miR-20a-3p, miR-3064-5p, miR-378g, miR-18a-3p, miR-216a-3p, miR-140-5p, miR-450b-3p, miR-2285x, miR-452-5p, miR-6527, miR-3956-3p, novel\_120, novel\_60, miR-2447, miR-326-3p, miR-423-5p, miR-2284q, miR-499a-5p, miR-144-5p, miR-503-3p, miR-2332, miR-105-5p, miR-2957, miR-100-3p, miR-105-1, miR-145b, miR-148b-5p, miR-381-3p, miR-193b-5p, miR-145a-5p, miR-300, miR-664-5p, miR-3074-1-3p, miR-105-2, miR-361-5p, miR-148a-5p

|         |                               |                                                                                                                                                                                                                                                                                                                                                                                                                                                                                                                                                                                                                                                                                                                                                                                                                                                                                                                                                                                                                                                                                                           |
|---------|-------------------------------|-----------------------------------------------------------------------------------------------------------------------------------------------------------------------------------------------------------------------------------------------------------------------------------------------------------------------------------------------------------------------------------------------------------------------------------------------------------------------------------------------------------------------------------------------------------------------------------------------------------------------------------------------------------------------------------------------------------------------------------------------------------------------------------------------------------------------------------------------------------------------------------------------------------------------------------------------------------------------------------------------------------------------------------------------------------------------------------------------------------|
| MR1     | ENSOARGO(major histone H1)    | miR-30e-5p, miR-199b-5p, miR-30d-5p, miR-30f, miR-493-5p, miR-221-5p, miR-542-5p, miR-7689-3p, miR-7977, miR-376e-3p, miR-2483-3p, miR-199a-5p, miR-4443, miR-877-5p, miR-27a-3p, miR-30b-5p, miR-331-3p, miR-3968, miR-335, miR-592, miR-335-5p, miR-3607-3p, miR-6134, miR-199b-5p, miR-30c-5p, miR-2366, miR-124-3p, miR-218-2-3p, miR-2904, miR-23b-5p, miR-30a-5p, miR-664-5p, miR-30c, miR-105-2, miR-378d, miR-27b-3p, miR-3120-5p, miR-105-1, miR-27a-3p, miR-153, miR-2284h-5p, miR-30b, miR-105-5p, miR-199b-5p, miR-30d, miR-30b-3p, miR-221-5p, miR-153-3p, miR-183-5p, miR-124a, miR-493-5p, miR-2285w, miR-432-3p, miR-1957a, novel_39, miR-199a-5p, miR-192-3p                                                                                                                                                                                                                                                                                                                                                                                                                             |
| SNCA    | ENSOARGO(synuclein)           | miR-2285b, miR-1343-3p, miR-145a-3p, miR-412, miR-499b-5p, miR-30b-3p, miR-3120-5p, miR-1248, miR-30b-3p, miR-1197-5p, miR-412-3p<br>miR-378c, miR-214, miR-1197-3p, miR-378c, miR-3184-5p, miR-122-5p, miR-2285j, miR-664a, miR-4492, miR-486b-3p, miR-504-5p, miR-378a-3p, miR-574-5p, miR-548o-3p, miR-660-5p, miR-182-5p, miR-2284s, novel_32, miR-204-3p, miR-320a, miR-329a, miR-625-5p, miR-485-5p, miR-2385-3p, miR-2432, miR-486-3p, miR-2285p, miR-185-3p, miR-422a, miR-320d, miR-450a-2-3p, miR-466i-5p, novel_127, novel_96, miR-18a-3p, miR-6517, miR-505-5p, miR-383-5p, miR-378h, miR-378i, miR-362-3p, miR-2366, miR-2300b-3p, miR-378a-3p, miR-4429, miR-133a-3p, miR-2447, miR-423-5p, miR-2428, miR-128-1-5p, miR-378e, miR-146b-3p, miR-3596, miR-6535, miR-320c, miR-361-3p, miR-18a-3p, miR-299b-5p, miR-504, miR-378f, miR-378d, miR-320b, miR-362-3p, miR-182-5p, miR-2331-5p, miR-491-5p, miR-3955-3p, miR-660, miR-214-3p, miR-432-5p, miR-9788-3p, miR-455-3p, miR-432, miR-873a-5p, miR-378b, miR-296-5p, miR-329-3p, miR-30b-3p, miR-30b-3p, miR-362-3p, miR-378c, miR-101c |
| KAT2A   | ENSOARGO(Klysine)             | novel_133, miR-2387, miR-188-3p, miR-138, miR-671-5p, miR-7862, miR-221-5p, novel_78, miR-320b, miR-342, miR-425-5p, miR-138-5p, miR-3955-3p, miR-31-3p, miR-221-5p, miR-342-3p, miR-1296-5p, miR-200a                                                                                                                                                                                                                                                                                                                                                                                                                                                                                                                                                                                                                                                                                                                                                                                                                                                                                                    |
| ZKSCAN5 | ENSOARGO(zinc finger protein) |                                                                                                                                                                                                                                                                                                                                                                                                                                                                                                                                                                                                                                                                                                                                                                                                                                                                                                                                                                                                                                                                                                           |

miR-4492, miR-874-5p, miR-324-3p, miR-320e, miR-29b-2-5p, miR-665, miR-181c-5p, miR-1271, miR-214, miR-3074-5p, miR-4510, miR-145a-3p, miR-1895, miR-339b, miR-129b-3p, miR-598-3p, miR-22-3p, miR-877-5p, miR-6130, miR-3065-3p, novel\_107, miR-182-5p, miR-299-3p, miR-466i-5p, miR-324-3p, miR-185-3p, miR-486-3p, miR-29b-1-5p, miR-377-5p, miR-133a-3p, miR-218-1-3p, miR-378d, miR-2904, miR-188-3p, miR-1193, miR-126-3p, novel\_133, miR-2300b-3p, miR-23b-3p, miR-383-5p, miR-23c, miR-212-5p, miR-18a-3p, miR-2285t, miR-3968, miR-4726-5p, miR-218-5p, novel\_82, miR-502-3p, novel\_111, miR-181d-5p, miR-3059-5p, miR-541-3p, miR-1983, miR-96-5p, miR-147-3p, miR-361-3p, miR-199b-5p, miR-500-3p, miR-4443, miR-378g, miR-211-5p, miR-3064-5p, miR-199b-5p, miR-214-3p, miR-491-5p, miR-1185-5p, miR-3085-3p, miR-505, miR-29b-1-5p, novel\_19, miR-182-5p, miR-5126, miR-23a-3p, miR-2330-5p, miR-501-3p, miR-125b-2-3p, miR-296-5p, miR-484, miR-541, miR-216a-3p, miR-147a, miR-1343-3p, novel\_78, miR-548w, miR-3432a, miR-204-5p, miR-486b-3p, miR-138-5p, miR-331-3p, miR-551b-3p, miR-2433, miR-1260b, novel\_42, miR-7144-5p, miR-671-5p, miR-23b, miR-3154, miR-2448-3p, miR-199a-5p, miR-3959-5p, miR-370-3p, miR-598-3p, novel\_127, novel\_96, miR-2898, miR-181b-5p, miR-127-5p, miR-191-3p, miR-339a, miR-1260a, miR-199a-5p, novel\_39, miR-29a-5p, miR-3065-3p, miR-148b-5p, miR-380-5p, miR-3064-5p, miR-29b-2-5p, miR-128-3p, miR-501-3p, novel\_121, miR-758-5p, miR-483-3p, miR-1271-5p, novel\_79, miR-299a-3p, miR-128-1-5p, miR-4324, miR-199b-5p, miR-2428, miR-211, novel\_101, miR-9851-3p, miR-1291, miR-412-3p, miR-3970, miR-216a-3p, miR-18a-3p, miR-3141, miR-299b-3p, miR-411b-3p, novel\_68, miR-3074-5p, miR-483-3p, miR-3141, miR-136-3p, novel\_51, miR-455-5p, miR-654-3p, miR-novel\_69, miR-489, miR-2483-3p, miR-3596, miR-151b, miR-99b-5p, miR-485-5p, miR-409-5p, miR-30e-5p, miR-30d-5p, miR-100-5p, miR-2903, miR-129-2-3p, miR-3059-5p, miR-486b-3p, miR-147-5p, miR-1843a-3p, miR-324-3p, miR-425-3p, miR-129-1-3p, miR-151-5p, miR-2300a-5p, miR-26b-3p, miR-7641, miR-99a-5p, miR-7b-5p, miR-223-3p, miR-30a-5p, miR-486-3p, miR-4532, miR-33a-5p, miR-2403, miR-30d, miR-99a, miR-7-5p, novel\_51, miR-99a-5p, miR-324-3p

UBE2T ENSOARGO(ubiquitin) si

ECSIT ENSOARGO(ECSIT) si

miR-502-5p, miR-28c, miR-371a-5p, miR-34c, novel\_87, miR-450a-5p, novel\_1, miR-342-3p, miR-495-3p, novel\_101, miR-1193, miR-219a-5p, miR-181d-5p, miR-9-5p, miR-24-3p, miR-449a, miR-301b-3p, miR-361-3p, miR-2387, miR-148a-3p, miR-136-5p, miR-7975, miR-139-5p, miR-329-5p, miR-3120-3p, miR-10a-5p, miR-499a-3p, miR-411b-3p, miR-34b, miR-652-3p, miR-342, miR-377-3p, miR-105-5p, miR-505, miR-130b-3p, miR-1343-5p, miR-214-3p, miR-130b-5p, miR-494-3p, miR-628-5p, miR-432-3p, miR-8485, miR-484, miR-10b, miR-3071-5p, miR-2426, miR-122-3p, miR-105-1, miR-130a-3p, miR-26b-3p, miR-425-3p, miR-3431, novel\_116, miR-216a-3p, let-7b-3p, miR-30e-3p, miR-370-5p, miR-5100, miR-324-3p, miR-100-3p, miR-30a-3p, miR-665, novel\_74, miR-874-5p, miR-454-3p, miR-130b-5p, let-7e-3p, miR-3074-2-3p, miR-214, miR-2903, miR-10b-5p, miR-1197-3p, miR-98-3p, let-7f-1-3p, miR-10b-3p, novel\_91, miR-543-3p, miR-625-5p, miR-671-5p, miR-582-5p, miR-545-3p, miR-548o-3p, miR-216b-3p, miR-370-5p, miR-34c-5p, miR-10a, miR-301a-3p, miR-582-5p, miR-377-3p, miR-499b-3p, miR-365a-3p, miR-656-3p, miR-139-5p, miR-133c, miR-2397-5p, miR-8117, miR-618, miR-34b-5p, miR-152-3p, miR-329a-5p, miR-30a-3p, miR-2403, miR-345-3p, miR-4286, miR-28b, miR-148b-5p, miR-2432, miR-450c-5p, miR-2285b, miR-98-3p, miR-218-2-3p, miR-1343-5p, miR-2427, novel\_73, miR-105-2, miR-34a-5p, let-7a-3p, miR-10a-5p, miR-3600, miR-7641, miR-212-5p, miR-30d-3p, miR-9-5p, miR-505-5p, miR-148b-3p, miR-1247-5p, miR-450a-1-3p, miR-30d-3p, miR-145b, miR-130a-3p, miR-1185-3p, novel\_121, miR-216a-3p, miR-376b-3p, miR-148b-3p, miR-145a-5p, miR-5703, miR-541, miR-128-3p, let-7f-2-3p, let-7f-2-3p, miR-30a-3p, miR-30f, miR-26a-5p, miR-376b-3p, miR-152-3p, miR-130b-3p, miR-17-3p, miR-26b-5p, miR-452-3p, miR-376d, miR-1185-2-3p, miR-301a-3p, miR-216a-3p, miR-148a-3p, miR-376a-3p, miR-2319a, miR-335-3p, miR-17-3p, miR-541-3p, miR-301b-3p, miR-30a-3p, miR-30e-3p, miR-34c-3p, miR-669a-3p, miR-454-3p, miR-17-3p, miR-3968, miR-190a-5p, novel\_74, miR-450b-3p, miR-29b-2-5p, miR-19b-1-5p, miR-142a-5p, novel\_48, miR-433-3p, miR-3154, miR-129b-3p, miR-450a-1-3p, miR-376c-3p, novel\_25, miR-34c-5p, miR-376e-3p, miR-377-3p, miR-296-3p, miR-532-5p, miR-548o-3p, miR-34b-5p, miR-127-5p, miR-345-3p, miR-2285b, miR-376c-3p, miR-29b-1-5p, miR-345-3p, miR-29b-2-5p, miR-34a-5p, miR-5703, novel\_133, miR-345-3p, miR-450a-1-3p, miR-376a-5p, miR-147-5p, miR-4726-5p, miR-301a-5p, miR-34c, miR-2440, miR-142b, miR-2284w, miR-449a, miR-3959-3p, miR-877-3p, miR-190b-5p, miR-376a-2-5p, miR-1983, miR-412-3p, miR-378b, miR-2483-3p, miR-34b, miR-10b, miR-487b-5p, miR-2411-3p, novel\_51, miR-2957, miR-190a, miR-29b-1-5p, miR-377-3p, let-7j, miR-432-3p, miR-628-5p, miR-494-3p, miR-3071-5p, miR-450c-3p, miR-1434-3p, miR-1843b-5p, miR-301b-5p, miR-432, miR-19b-2-5p, miR-142-5p, miR-412-5p, miR-432-5p, miR-548w

miR-181c-3p, miR-331-3p, miR-125b-5p, miR-6740-5p, miR-409-3p, miR-1-5p, miR-2332, miR-486b-3p, miR-125a, miR-141-3p, miR-487a-3p, miR-874-3p, miR-374c-3p, miR-769, miR-18a, miR-3154, miR-381-3p, miR-23a-5p, miR-485-5p, miR-329a, miR-3064-5p, miR-181a-2-3p, miR-4286, novel\_39, let-7g, miR-2285b, miR-450b-5p, miR-30f, miR-217, let-7c-5p, miR-2397-5p, miR-107, novel\_96, miR-200a-3p, miR-450a-2-3p, miR-200c-3p, miR-1a-2-5p, miR-191-3p, miR-181b-5p, let-7f-5p, miR-18b-5p, miR-429-3p, miR-450a-1-3p, miR-2284z, novel\_121, miR-24-2-5p, miR-758-5p, miR-2411-5p, miR-330-5p, miR-345-3p, miR-1290, miR-3578, let-7d, miR-300, miR-193b-3p, miR-2285x, miR-342-3p, miR-1a-1-5p, miR-326-3p, miR-2284w, miR-301b-3p, miR-24-3p, miR-33a-3p, let-7i, miR-576-3p, miR-502b, miR-320b, miR-216b-3p, miR-669, miR-146b-3p, miR-2404, miR-670-3p, miR-374c-3p, miR-150-5p, miR-1306, miR-18b, miR-3141, miR-7975, let-7e-5p, miR-412-3p, miR-107, miR-19a-3p, miR-363-5p, miR-296-3p, miR-432-3p, miR-3141, miR-2411-3p, novel\_51, miR-224-5p, miR-296-3p, miR-125a-5p, miR-193a-3p, miR-124-5p, miR-31-5p, miR-133b-5p, miR-103a-3p, miR-103, miR-2355-3p, let-7g-5p, miR-185-5p, miR-197-3p, miR-450c-3p, miR-873a-5p, miR-1285, miR-181a-5p, miR-1843b-5p, miR-2113, miR-30b-3p, miR-2284ab, miR-16-1-3p, miR-665-5p, miR-3074-2-3p, let-7b, miR-4510, miR-145a-3p, let-7b-5p, miR-3184-5p, miR-6134, miR-769-5p, miR-346, miR-224-5p, miR-324-3p, miR-665, let-7f, miR-454-3p, miR-450b-3p, miR-487b-5p, miR-154a-3p, miR-296-3p, miR-532-5p, miR-221-5p, miR-548o-3p, let-7i-5p, miR-877-5p, miR-499b-3p, miR-301a-3p, miR-27a-5p, miR-6130, miR-193b-3p, miR-139-5p, miR-129b-3p, miR-299, miR-450a-1-3p, miR-543-3p, miR-186-5p, miR-1827, miR-154b-3p, miR-18a-5p, miR-2887, miR-345-3p, miR-216c-5p, miR-487a, miR-2411, miR-486-3p, miR-125b-2-3p, miR-219b-5p, miR-324-3p, miR-125b, miR-185-3p, miR-345-novel\_1, miR-1a-2-5p, miR-147-5p, miR-1-5p, miR-185-5p, novel\_121, miR-1b-5p, miR-4443, miR-9788-3p, miR-1a-1-5p, miR-3431, miR-2428, miR-204-3p, miR-2447, novel\_101, miR-214, miR-450b-3p, miR-21-3p, miR-214-3p, miR-4492, miR-2366, miR-21a-3p, novel\_133, miR-760-3p, miR-4726-5p, miR-138-5p, miR-491-5p, novel\_96, miR-1343-5p, miR-7-5p, miR-371b-3p, miR-4532, miR-668-3p, miR-30b-3p, miR-138, miR-7b-5p, miR-30b-3p, miR-598-3p, miR-1343-5p, miR-505-5p, miR-3957, miR-194-3p, novel\_78, miR-3957-5p, novel\_68, miR-4792, miR-187-3p, miR-7977, miR-296-3p, miR-598-3p

HADHA ENSOARGO(hydroxya

NWD1 ENSOARGO(NACHT an

SMCR8 ENSOARGO(Smith-Ma

CACNA1E ENSOARGO(calcium

miR-27b-5p, miR-21a-3p, miR-186-5p, miR-625-5p, miR-339b, miR-345-5p, miR-370-5p, miR-378a-3p, miR-204-3p, miR-6130, miR-216b-5p, miR-139-5p, miR-10a, miR-665, miR-320e, miR-324-3p, miR-30a-3p, miR-30e-3p, miR-2285j, miR-15b-3p, miR-708-5p, miR-208b-5p, miR-6516-3p, miR-17-3p, miR-664a, novel\_74, miR-3074-2-3p, miR-3184-3p, miR-4510, miR-378c, miR-10b-5p, miR-378a-3p, miR-1197-5p, miR-140-3p, miR-217-5p, miR-188-3p, miR-5703, miR-2366, miR-2300b-3p, miR-376a-5p, miR-193b-5p, miR-378i, miR-34a-5p, miR-133a-3p, miR-142-3p, novel\_73, miR-33b-3p, miR-30d-3p, miR-18a-3p, miR-532-3p, miR-200b, miR-340-5p, miR-185-3p, miR-422a, miR-374a-5p, miR-299-3p, miR-3653-3p, miR-34b-5p, miR-345-3p, miR-369-3p, miR-105-3p, miR-486-3p, miR-130a-5p, miR-181b-1-3p, miR-376a-5p, miR-361-3p, miR-136-5p, miR-211-5p, miR-374b-5p, miR-2285u, miR-139-5p, miR-27a-3p, miR-4443, miR-7857-3p, miR-378e, miR-301a-5p, miR-371a-5p, miR-2285n, novel\_82, miR-181d-5p, miR-9-5p, miR-452-5p, miR-2447, miR-3059-5p, miR-362-5p, miR-361-3p, miR-30b-3p, miR-10b, miR-301b-5p, miR-378b, miR-296-5p, miR-2284aa, miR-101c, miR-450b-5p, miR-378c, miR-1388-5p, miR-27a-3p, miR-145b, miR-181b-2-3p, miR-199b-3p, miR-1343-3p, miR-500-5p, miR-9788-3p, miR-455-3p, miR-539-5p, miR-153, miR-505, miR-1306-5p, miR-326, miR-153-3p, miR-491-5p, miR-494-3p, miR-3187-3p, miR-378d, miR-376c-5p, miR-362-5p, miR-137-3p, miR-2448-3p, miR-488-3p, miR-376c-5p, miR-2318, miR-345-5p, miR-1271, miR-2355-5p, miR-3068-3p, miR-133c, miR-34c-5p, miR-300-3p, miR-370-5p, miR-134-5p, miR-486b-3p, miR-28-5p, miR-204-5p, novel\_9, miR-374b, miR-378c, miR-1260b, miR-500b-5p, miR-330-5p, miR-23b-5p, miR-7134-5p, miR-134, miR-10a-5p, miR-200b-3p, novel\_79, miR-1224-5p, miR-429-3p, miR-299a-3p, novel\_121, miR-2284r, miR-134-5p, miR-758-5p, miR-483-3p, miR-2284q, miR-222-3p, miR-2285af, miR-376b-3p, miR-323b-3p, miR-330-3p, miR-192-3p, miR-2285b, miR-6240, miR-495-5p, let-7g-3p, miR-496, miR-376a-3p, miR-503-3p, miR-221, miR-484, miR-376b-3p, miR-323b, miR-376b-3p, miR-331-5p, miR-376d, miR-221-3p, miR-496-3p, miR-330-3p, novel\_78, miR-503-3p, miR-222, miR-374b-5p, miR-2285aa, miR-491-5p, miR-320d, miR-2898, miR-21-3p, novel\_96, miR-214-3p, miR-320b, miR-125a-3p, miR-216a-5p, miR-330-3p, miR-92a-1-5p, novel\_39, miR-486-3p, miR-2310, miR-6240, miR-345-3p, miR-138, miR-4429, miR-133a-3p, miR-744-5p, miR-496-5p, miR-505-5p, miR-2320-3p, miR-147a, miR-149-5p, novel\_4, miR-330-3p, miR-138-5p, miR-874-5p, miR-486b-3p, miR-6123, miR-361-3p, miR-6525, miR-346, miR-1285-5p, novel\_101, miR-214, miR-147-3p, miR-1895, miR-320a, novel\_69, miR-320c, miR-4443, miR-552-3p, miR-3120-3p

ALOX15B

ENSOARGO(arachido

NFKBIZ

ENSOARGO(nuclear

PDPK1

ENSOARGO(3-phosph

miR-28a-3p, novel\_42, miR-16-5p, miR-1260b, miR-2433, miR-874-3p, miR-574-5p, miR-2355-5p, miR-2285aa, miR-345-5p, miR-329a, miR-876-3p, novel\_39, let-7g, miR-200a, miR-664-3p, let-7f-5p, miR-127-5p, miR-28-3p, miR-152-3p, miR-200a-3p, novel\_127, novel\_96, miR-6517, miR-2285ad, miR-412, miR-1224-5p, novel\_79, miR-322-5p, miR-505-5p, miR-450a-1-3p, miR-196a-5p, miR-330-5p, miR-335-5p, miR-193b-3p, miR-576-3p, miR-4324, miR-1247-3p, miR-425-5p, miR-6123, novel\_68, miR-181b-3p, miR-677, miR-669, miR-148a-3p, miR-1306, miR-412-3p, miR-410-5p, let-7e-5p, miR-493-5p, miR-628-5p, let-7f-2-3p, let-7f-2-3p, miR-668-3p, miR-296-3p, novel\_51, miR-196b-5p, miR-193a-3p, miR-339-5p, miR-542-3p, miR-432, novel\_23, miR-450c-3p, miR-16b, miR-497-5p, miR-4508, let-7b, miR-433-5p, miR-214, miR-3958-5p, miR-346, miR-224-5p, miR-6525, miR-3184-5p, miR-122-5p, let-7f, miR-664a-5p, miR-3604, miR-665, miR-130b-5p, miR-4492, miR-2331-3p, miR-296-3p, miR-552-3p, miR-15b-5p, let-7i-5p, miR-450a-1-3p, miR-299, miR-345-5p, miR-339b, miR-186-5p, miR-345-3p, miR-181b-1-3p, miR-143-3p, miR-486-3p, miR-210-5p, miR-92a-1-5p, miR-324-3p, miR-3601, miR-219b-5p, miR-98-5p, miR-202-5p, let-7k, miR-18a-3p, miR-1247-5p, miR-2366, miR-1961, miR-184-3p, miR-133a-3p, miR-664-5p, miR-3956-3p, miR-2447, miR-877-3p, miR-361-3p, miR-423-5p, novel\_82, miR-218-5p, miR-301a-5p, miR-139-5p, miR-4443, miR-1185-2-3p, miR-140-5p, miR-378j, miR-1983, miR-493-5p, miR-1388-3p, miR-8485, miR-16b, miR-29b-1-5p, miR-491-5p, miR-103a-2-5p, miR-214-3p, miR-1343-3p, miR-145b, miR-181b-2-3p, miR-1185-3p, miR-421, miR-455-3p, miR-301b-5p, miR-541, miR-329-3p, miR-362-3p, miR-1306-5p, miR-133a-3p, miR-135a-1-3p, miR-370-5p, miR-138-5p, miR-486b-3p, miR-615-5p, miR-141-3p, miR-370-3p, miR-3154, miR-10b-3p, miR-485-5p, miR-671-5p, miR-1286, miR-181a-2-3p, miR-29b-2-5p, miR-324-3p, miR-185-3p, miR-2433, miR-370-5p, miR-1343-5p, miR-4726-5p, miR-1193, miR-2330-5p, miR-4532, miR-361-3p, miR-371b-3p, miR-1343-5p, miR-3154, miR-432, miR-296-5p, miR-370-5p, miR-6535, miR-214-5p, miR-432-5p, novel\_74, miR-664a, miR-502b, miR-330-3p, miR-100-3p, miR-877-3p, miR-22841, miR-423-5p, miR-3184-5p, miR-2428, miR-6240, miR-652-5p, miR-181a-2-3p, miR-18a-5p, miR-361-3p, miR-18b, miR-223-3p, miR-412-3p, miR-150-5p, miR-18a, novel\_69, miR-330-3p, novel\_78, miR-412, miR-2355-5p, miR-296-3p, miR-18b-5p, miR-424-5p, miR-500, miR-129-5p, miR-29a, miR-16a, miR-15a, miR-29b-3p, miR-576-3p, miR-1306-3p, miR-1285-5p, miR-877-3p, miR-16-5p, miR-29c-3p, miR-219b-3p, miR-539-5p, miR-885-5p, miR-195a-5p, miR-876-3p, miR-500a-3p, miR-1306-3p, miR-22-3p, miR-15b-5p, miR-544-3p, miR-29a-3p, miR-140-5p, miR-16b, miR-296-3p, miR-2285p, miR-3187-3p, miR-296-3p, miR-654-3p, miR-424-5p, miR-3529-3p, miR-497-5p, miR-29b, miR-16b, miR-1388-5p, miR-544a, miR-2427, miR-22-3p, miR-29d-3p, miR-2904, miR-544b, miR-322-5p, miR-15a-5p, novel\_4

DZANK1 ENSOARGO(double z

FOXN1 ENSOARGO(forkhead

MB ENSOARGO(myoglobi

ELF5 ENSOARGO(E74-like

|          |                   |                                                                                                                                                                                                                                                                                                                                                                                                                                                                                                                                                                                   |
|----------|-------------------|-----------------------------------------------------------------------------------------------------------------------------------------------------------------------------------------------------------------------------------------------------------------------------------------------------------------------------------------------------------------------------------------------------------------------------------------------------------------------------------------------------------------------------------------------------------------------------------|
|          |                   | miR-505-3p, miR-135b-5p, miR-1895, miR-133a-3p, miR-345-5p, miR-345-5p, miR-3154, miR-532-3p, miR-9788-                                                                                                                                                                                                                                                                                                                                                                                                                                                                           |
| APOL6    | ENSOARGO(apolipop | 3p, novel_32, miR-6535, miR-2411-5p, miR-300-3p, miR-505-3p, miR-7689-3p, novel_78, miR-135a-5p, novel_51, miR-425-5p, miR-133a-5p, miR-345-5p, miR-2411, miR-3184-3p                                                                                                                                                                                                                                                                                                                                                                                                             |
|          |                   | miR-491-5p, novel_96, miR-5126, novel_17, miR-326, miR-3141, miR-2331-5p, miR-320e, miR-6525, miR-326-3p, miR-1271-                                                                                                                                                                                                                                                                                                                                                                                                                                                               |
| NDUFA10  | ENSOARGO(NADH deh | 3p, miR-2887, miR-30b-3p, miR-1291, miR-361-3p, miR-3141, miR-30b-3p, miR-330-5p, miR-2284s, miR-151-5p, miR-151b, miR-187-3p, miR-1271                                                                                                                                                                                                                                                                                                                                                                                                                                           |
|          |                   | miR-378c, miR-1839-5p, miR-378b, miR-301b-5p, miR-758-3p, miR-3431, miR-455-3p, miR-548w, miR-483-3p, miR-124-5p, miR-660, miR-365b-5p, miR-182-5p, miR-378d, miR-193a, miR-8485, miR-503-3p, miR-758-3p, miR-1b-5p, miR-491-3p, miR-504, miR-378f, miR-140-5p, miR-378b, miR-376b-3p, miR-216a-3p, miR-378e, miR-452-3p, miR-2319b, miR-2284q, miR-502b, miR-30b-5p, miR-382-3p, miR-1247-3p, miR-2440, miR-301a-5p, miR-1a-1-5p, miR-758-5p, miR-493-3p, miR-142-3p, miR-300, miR-30c, miR-128-3p, miR-361-5p, miR-378i, miR-30c-5p, miR-                                       |
| EHF      | ENSOARGO(ets homo | 1290, miR-2408, miR-140-3p, miR-378a-3p, miR-30a-5p, miR-483-3p, miR-378h, miR-340-5p, miR-2284h-5p, miR-548e-3p, miR-380-5p, miR-1a-2-5p, miR-30d, miR-2285af, miR-30b, miR-30f, miR-422a, novel_39, miR-192-3p, miR-490-3p, miR-2285w, miR-369-3p, miR-345-3p, miR-767, miR-30f, miR-3074-1-3p, miR-1248, miR-381-3p, miR-30e-5p, miR-598-3p, miR-30d-5p, miR-487b-5p, miR-365a-3p, miR-504-5p, miR-2331-3p, miR-378a-3p, miR-660-5p, miR-598-3p, miR-182-5p, miR-487b-5p, miR-767-5p, miR-1-5p, miR-338-5p, miR-224-5p, miR-1197-3p, miR-378c, miR-365a-5p, miR-6134, miR-378c |
|          |                   | miR-3064-5p, miR-378b, miR-320b, miR-378g, miR-378e, miR-34b, miR-670-3p, miR-361-3p, miR-1291, novel_94, miR-378f, miR-361-3p, miR-326-3p, miR-449a, miR-423-5p, miR-2440, miR-34c, miR-128-1-5p, miR-379-3p, miR-340-3p, miR-339-5p, miR-134-3p, miR-378b, miR-296-5p, miR-378c, miR-378d, miR-193a, miR-326, novel_19, miR-365b-5p, miR-3085-3p, miR-214-3p, miR-221-5p, miR-378a-3p, miR-3068-3p, miR-2355-5p, miR-                                                                                                                                                           |
| SLC38A10 | ENSOARGO(solute c | 34c-5p, miR-2284s, miR-411, miR-339b, novel_42, miR-378c, miR-214, miR-3184-5p, miR-365a-5p, miR-378c, miR-6740-5p, miR-874-5p, miR-708-5p, miR-28-5p, miR-6517, novel_79, miR-7641, miR-378h, miR-616-3p, miR-1247-5p, miR-378i, miR-7134-5p, miR-2427, miR-378a-3p, miR-1197-5p, miR-330-5p, miR-411-3p, miR-493-3p, miR-34a-5p, miR-3064-5p, miR-490-3p, miR-2285af, miR-324-3p, miR-422a, miR-92a-1-5p, miR-339a, miR-185-3p, miR-127-5p, miR-221-5p, miR-34b-5p, miR-2484                                                                                                    |
|          |                   | miR-129b-5p, miR-429-3p, novel_1, miR-487b-5p, miR-365a-3p, miR-1185-5p, miR-3958-3p                                                                                                                                                                                                                                                                                                                                                                                                                                                                                              |
| ANXA3    | ENSOARGO(annexin  | miR-361-5p, miR-129-5p, miR-576-3p, miR-2448-3p, miR-382-                                                                                                                                                                                                                                                                                                                                                                                                                                                                                                                         |
| HEPACAM2 | ENSOARGO(HEPACAM  | 5p, miR-197-5p, miR-500a-5p, miR-147a, miR-758-5p, miR-380-5p, miR-2432, miR-216c-5p, miR-380-5p                                                                                                                                                                                                                                                                                                                                                                                                                                                                                  |



miR-136-3p, miR-342-3p, miR-376a-3p, miR-17-3p, miR-542-5p, novel\_101, miR-2285m, miR-2428, miR-6529b, miR-28c, miR-142b, miR-133a-5p, miR-128-1-5p, miR-147-5p, miR-203b-5p, miR-656-5p, miR-320b, miR-2387, miR-2285ab, miR-376b-5p, miR-18a-3p, miR-376b-3p, miR-150-5p, miR-107, miR-19a-3p, miR-1291, miR-6395, miR-7975, miR-130b-5p, miR-380-5p, miR-654-3p, miR-503-3p, miR-345-5p, miR-224-5p, miR-503-5p, miR-455-5p, miR-194a, novel\_51, miR-466f-3p, miR-660, miR-1343-5p, miR-103a-3p, miR-133b-5p, miR-3955-5p, miR-31-5p, miR-665, miR-339-5p, miR-185-5p, miR-134-3p, miR-503-5p, miR-3431, miR-432-5p, miR-103, miR-411-5p, miR-1434-3p, miR-542-3p, miR-181a-5p, miR-432, miR-653, miR-194-5p, miR-3071-5p, miR-197-3p, miR-22-3p, miR-138, miR-188-5p, miR-2284x, miR-455-5p, miR-4508, novel\_42, miR-500b-5p, miR-145-3p, miR-99b-3p, miR-2332, miR-2433, miR-331-3p, miR-6740-5p, miR-138-5p, miR-486b-3p, miR-28-5p, miR-874-3p, miR-487a-3p, miR-141-3p, miR-542-5p, miR-2355-5p, miR-99a-3p, miR-3959-5p, miR-154b-5p, miR-2448-3p, miR-488-3p, miR-362-5p, miR-376c-5p, miR-3154, miR-345-5p, miR-876-3p, miR-485-5p, miR-376c-5p, miR-495-5p, miR-380-5p, miR-24-2-5p, miR-28b, miR-2478, miR-125a-3p, miR-376b-3p, miR-339a, miR-181b-5p, miR-191-3p, miR-17-3p, miR-2898, novel\_127, miR-200a-3p, miR-107, miR-6517, miR-412, novel\_79, miR-9-5p, miR-24-2-5p, miR-214-5p, miR-129-1-3p, miR-582-3p, miR-545-5p, miR-1290, miR-1343-5p, miR-2427, miR-181d-5p, miR-194b-5p, miR-9-5p, miR-2285f, novel\_111, miR-361-3p, miR-362-5p, miR-101-3p, miR-2440, novel\_82, miR-382-3p, miR-1973, miR-4726-5p, miR-154-3p, miR-2285t, miR-10b, miR-4792, miR-24-1-5p, miR-7977, miR-2483-3p, miR-25, miR-378g, miR-376d, miR-361-3p, miR-504, miR-299b-5p, miR-376a-3p, miR-124a, miR-1388-3p, miR-744-3p, miR-1532, miR-3187-3p, miR-312, miR-29b-1-5p, miR-3055-3p, miR-107-5p, miR-16-1-3p, miR-103a-2-5p, miR-21-3p, miR-16-1-3p, miR-2318

miR-135a-5p, miR-29b-3p, miR-29a, miR-29c-3p, miR-214, miR-877-3p, miR-24-3p, miR-150-5p, miR-378b, miR-23b, miR-135b-5p, miR-216b-3p, miR-3065-3p, miR-329-5p, miR-203-3p, miR-154b-5p, miR-29a-3p, miR-466f-3p, miR-214-3p, miR-23a-3p, miR-574-3p, miR-329a-5p, miR-2285w, miR-2424, miR-3065-3p, miR-380-3p, miR-2285r, miR-29d-3p, novel\_23, miR-1434-3p, miR-380-3p, miR-29b, miR-26b-3p, miR-548w, novel\_78, miR-2284h-5p, novel\_121, miR-23b-3p, miR-23c

FARS2 ENSOARGO(phenylal:3p, miR-28-5p, miR-874-3p, miR-487a-3p, miR-141-3p, miR-542-5p, miR-2355-5p, miR-99a-3p, miR-3959-5p, miR-154b-5p, miR-2448-3p, miR-488-3p, miR-362-5p, miR-376c-5p, miR-3154, miR-345-5p, miR-876-3p, miR-485-5p, miR-376c-5p, miR-495-5p, miR-380-5p, miR-24-2-5p, miR-28b, miR-2478, miR-125a-3p, miR-376b-3p, miR-339a, miR-181b-5p, miR-191-3p, miR-17-3p, miR-2898, novel\_127, miR-200a-3p, miR-107, miR-6517, miR-412, novel\_79, miR-9-5p, miR-24-2-5p, miR-214-5p, miR-129-1-3p, miR-582-3p, miR-545-5p, miR-1290, miR-1343-5p, miR-2427, miR-181d-5p, miR-194b-5p, miR-9-5p, miR-2285f, novel\_111, miR-361-3p, miR-362-5p, miR-101-3p, miR-2440, novel\_82, miR-382-3p, miR-1973, miR-4726-5p, miR-154-3p, miR-2285t, miR-10b, miR-4792, miR-24-1-5p, miR-7977, miR-2483-3p, miR-25, miR-378g, miR-376d, miR-361-3p, miR-504, miR-299b-5p, miR-376a-3p, miR-124a, miR-1388-3p, miR-744-3p, miR-1532, miR-3187-3p, miR-312, miR-29b-1-5p, miR-3055-3p, miR-107-5p, miR-16-1-3p, miR-103a-2-5p, miR-21-3p, miR-16-1-3p, miR-2318

RNPC3 ENSOARGO( RNA-bind

UACA ENSOARGO( uveal au

|         |                    |                                                                                                                                                                                                                                                                                                                                                                                                                                                                                                                                                                                                                                                                                                                                                                                                                                                                                                                                                                                                                                                                                                                                                                                                                                                                                                                                                                                                                                                                                                                                                                                                                                                                                                                                                                                                                                                                                                                                                                         |
|---------|--------------------|-------------------------------------------------------------------------------------------------------------------------------------------------------------------------------------------------------------------------------------------------------------------------------------------------------------------------------------------------------------------------------------------------------------------------------------------------------------------------------------------------------------------------------------------------------------------------------------------------------------------------------------------------------------------------------------------------------------------------------------------------------------------------------------------------------------------------------------------------------------------------------------------------------------------------------------------------------------------------------------------------------------------------------------------------------------------------------------------------------------------------------------------------------------------------------------------------------------------------------------------------------------------------------------------------------------------------------------------------------------------------------------------------------------------------------------------------------------------------------------------------------------------------------------------------------------------------------------------------------------------------------------------------------------------------------------------------------------------------------------------------------------------------------------------------------------------------------------------------------------------------------------------------------------------------------------------------------------------------|
| ALCAM   | ENSOARGO(activate) | <p>miR-137-3p, miR-23b, miR-18a, miR-345-5p, miR-1814c, miR-215-5p, miR-34c-5p, miR-3965, miR-133c, miR-2332, miR-144, miR-100-3p, miR-6740-5p, miR-409-3p, novel_9, miR-2284v, miR-103b, miR-3591-5p, miR-3578, miR-200b-3p, miR-429-3p, miR-7641, miR-18b-5p, miR-9-5p, miR-2285af, miR-200c, miR-200c-3p, miR-181b-5p, miR-152-3p, miR-30a-3p, miR-1, miR-181a-2-3p, miR-148b-5p, miR-376b-5p, miR-376c-5p, miR-2285b, miR-148a-3p, miR-18b, miR-150-5p, miR-3591-3p, miR-3120-3p, miR-34b, miR-144-3p, miR-34c, miR-206, miR-219b-3p, miR-342-3p, novel_101, miR-495-3p, miR-449a, miR-2284w, miR-1434-3p, miR-542-3p, miR-27b-3p, miR-2285g, miR-2355-3p, novel_51, miR-130b-5p, miR-2483-5p, let-7f-2-3p, let-7f-2-3p, miR-539-3p, miR-345-5p, miR-21a-3p, miR-2285c, miR-18a-5p, miR-345-5p, novel_99, miR-21-3p, miR-192-5p, miR-499b-3p, miR-544-3p, novel_25, miR-30e-3p, miR-30a-3p, miR-208b-5p, miR-130b-5p, miR-206-3p, miR-338-3p, miR-215-5p, miR-1197-5p, miR-34a-5p, miR-148a-5p, miR-3600, miR-30d-3p, miR-485-3p, miR-487a-3p, miR-23b-3p, miR-23c, miR-200b, miR-148b-3p, miR-340-5p, novel_83, miR-2285p, miR-466i-5p, miR-34b-5p, miR-1277-5p, miR-335-3p, miR-499b-5p, miR-541-5p, miR-499a-3p, miR-1185-2-3p, miR-27a-3p, miR-107-5p, miR-181d-5p, miR-9-5p, novel_111, miR-8095, miR-7705, miR-2284r, miR-323b, miR-1a-3p, miR-125b-2-3p, miR-544a, miR-27a-3p, miR-455-3p, miR-148b-5p, miR-126a-5p, miR-2285e, miR-1185-3p, miR-342, miR-323b-3p, miR-2957, miR-3955-3p, miR-103a-2-5p, miR-1388-3p, miR-382-3p, miR-23a-3p, let-7c-3p, miR-8485, miR-2310, miR-544-3p, miR-383-5p, miR-374c-3p, novel_121, miR-1185-3p, miR-1185-2-3p, miR-544b, miR-203-3p, miR-500-5p, miR-20a-3p, miR-544a, miR-181a-5p, miR-345-3p, miR-362-5p, miR-378j, novel_111, miR-125b-2-3p, miR-500b-5p, miR-362-5p, miR-2285b, miR-181c-5p, let-7f-2-3p, miR-2285x, let-7f-2-3p, miR-181d-5p, miR-2483-5p, miR-181b-5p, miR-345-3p, novel_87, miR-500a-5p</p> |
| RAD21L1 | ENSOARGO(RAD21 co  |                                                                                                                                                                                                                                                                                                                                                                                                                                                                                                                                                                                                                                                                                                                                                                                                                                                                                                                                                                                                                                                                                                                                                                                                                                                                                                                                                                                                                                                                                                                                                                                                                                                                                                                                                                                                                                                                                                                                                                         |

KDM8

ENSOARGOC lysine (

miR-185-5p, miR-134-3p, miR-133b-5p, miR-187-3p, miR-26b-3p, miR-219a-1-3p, miR-26a-2-3p, miR-542-3p, miR-223-3p, miR-197-3p, miR-628-5p, miR-363-5p, miR-378a-5p, miR-1343-5p, novel\_51, miR-299b-3p, miR-670-3p, miR-669, miR-3074-5p, novel\_68, miR-3120-3p, miR-412-3p, miR-1291, miR-378f, miR-505-3p, miR-18b, miR-216a-3p, miR-18a-3p, miR-24-3p, miR-199b-5p, novel\_101, miR-2285x, miR-502b, miR-378h, miR-214-5p, miR-582-3p, miR-299a-3p, miR-18b-5p, miR-1224-5p, miR-128-3p, miR-3578, miR-23b-5p, miR-1343-5p, novel\_39, miR-199a-5p, miR-2898, miR-543-5p, novel\_127, miR-154b-5p, miR-199a-5p, miR-874-3p, miR-215-5p, miR-2355-5p, miR-370-3p, miR-2285aa, miR-2474, miR-18a, miR-378c, miR-133a-3p, miR-28-5p, miR-486b-3p, miR-331-3p, miR-147a, miR-2459, miR-9788-3p, miR-1343-3p, miR-409b, miR-1388-5p, miR-378c, miR-301b-5p, miR-541, miR-484, miR-378b, miR-296-5p, miR-378d, miR-214-3p, miR-199b-5p, miR-378e, miR-3596, miR-378g, miR-4443, miR-4792, miR-7689-3p, miR-1983, miR-199b-5p, miR-361-3p, miR-361-3p, miR-877-3p, miR-541-3p, miR-3956-3p, miR-3059-5p, novel\_60, novel\_82, miR-2285n, miR-301a-5p, miR-1247-5p, miR-532-3p, novel\_83, miR-671-3p, miR-18a-3p, miR-505-3p, miR-212-5p, miR-378d, miR-133a-3p, miR-193b-5p, miR-2300b-3p, miR-215-5p, miR-2366, novel\_133, miR-378i, miR-378a-3p, miR-1197-5p, miR-130a-5p, miR-486-3p, miR-760-3p, miR-466i-5p, miR-299-3p, miR-21-3p, miR-221-5p, miR-210-5p, miR-422a, miR-324-3p, miR-192-5p, novel\_32, miR-378a-3p, miR-221-5p, miR-18a-5p, miR-133b-3p, miR-1827, miR-543-3p, miR-1895, miR-338-3p, miR-145a-3p, miR-3074-5p, miR-378c, miR-214, miR-708-5p, miR-665, miR-324-3p

miR-1197-3p, miR-145-3p, miR-378c, miR-28a-3p, miR-1306-5p, miR-103b, miR-193a-5p, novel\_9, miR-134-5p, miR-28-5p, miR-5100, miR-410-5p, miR-300-3p, miR-199a-5p, let-7g-3p, miR-485-5p, miR-1248, miR-190a-3p, novel\_48, miR-320a, miR-200a-5p, miR-192-3p, miR-1957a, miR-199a-5p, miR-29a-5p, miR-3529-3p, miR-4286, miR-181a-2-3p, miR-200c-3p, miR-28-3p, miR-200c, miR-219-3p, miR-217, miR-378h, miR-24-2-5p, miR-505-5p, novel\_121, miR-486-5p, miR-129-1-3p, miR-545-5p, miR-134-5p, miR-429-3p, miR-6517, miR-299a-3p, miR-7641, let-7a-2-3p, miR-200b-3p, miR-134, miR-3578, miR-3591-5p, miR-501-3p, miR-199b-5p, novel\_27, miR-135a-2-3p, miR-656-5p, miR-22-5p, miR-6402, miR-576-3p, miR-425-5p, miR-33a-3p, miR-299b-3p, miR-146b-3p, miR-320c, miR-3120-3p, miR-1291, miR-505-3p, miR-6395, miR-378f, miR-6516-3p, miR-2387, miR-3065-5p, miR-378b, miR-654-3p, let-7a-2-3p, miR-296-3p, miR-6240, let-7f-2-3p, let-7f-2-3p, miR-668-3p, miR-378a-5p, miR-452-5p, miR-296-3p, novel\_51, miR-330-3p, miR-185-5p, miR-133b-5p, miR-31-5p, miR-3955-5p, miR-16-1-3p, miR-30b-3p, miR-744-5p, miR-223-3p, miR-2113, novel\_23, miR-98-3p, miR-346, miR-145a-3p, miR-129-2-3p, miR-378c, miR-425-5p, miR-3074-2-3p, miR-2330-3p, miR-6516-3p, miR-669a-3p, miR-708-5p, let-7b-3p, miR-338-5p, miR-655-3p, miR-219b-3p, miR-139-5p, miR-216b-5p, miR-582-5p, novel\_32, miR-204-3p, miR-5480-3p, miR-378a-3p, miR-296-3p, miR-182-5p, miR-532-5p, let-7g-3p, let-7f-1-3p, miR-21a-3p, miR-655, miR-130a-5p, miR-376c-3p, miR-29b-1-5p, miR-143-3p, miR-345-3p, miR-195a-3p, miR-466i-5p, miR-320d, miR-21-3p, miR-299-3p, miR-1277-5p, miR-210-5p, miR-422a, miR-200b, miR-328-3p, miR-505-3p, miR-4429, miR-33b-3p, let-7a-3p, miR-16-1-3p, miR-2366, miR-378i, miR-217-5p, miR-1197-5p, miR-378a-3p, miR-5703, miR-188-3p, miR-2904, miR-98-3p, novel\_111, miR-219a-2-3p, miR-200a, miR-378d, miR-1388-3p, miR-466i-5p, miR-422a, miR-219-3p, miR-125a-3p, miR-9788-3p, miR-532-3p, miR-378h, miR-7641, novel\_4, miR-1343-3p, miR-16-2-3p, miR-378c, miR-378a-3p, miR-188-3p, miR-542-3p, miR-378b, miR-378i, miR-219a-2-3p, miR-378c, miR-2285x, miR-3957-3p, miR-378c, novel\_42, miR-4726-5p, miR-128-1-5p, miR-3604, miR-219b-3p, miR-1973, miR-6402, miR-2285j, miR-877-5p, miR-378e, miR-552-3p, miR-615-5p, miR-874-3p, miR-378a-3p, miR-2331-3p, miR-504-5p, miR-378f, miR-504, miR-2387

miR-331-5p, miR-411b-3p, miR-677, miR-181b-3p, miR-2284n, miR-2448-3p, miR-133b-3p, miR-9-3p, miR-1306-5p, miR-2284v, miR-133a-3p, miR-194b-5p, miR-452-5p, miR-758-5p, miR-2285j, miR-142b, miR-665, miR-330-3p, miR-380-5p, miR-181b-2-3p, miR-2284d, miR-1298-3p, miR-582-3p, miR-9788-3p, miR-1285, miR-194-5p, miR-2284ab, miR-3120-5p, miR-380-5p, miR-1388-3p, miR-6240, miR-382-3p, miR-380-5p, miR-143-3p, miR-330-3p, miR-194a, miR-2284m, miR-21-3p

miR-144-3p, miR-6535, miR-1185-2-3p, miR-6130, miR-374c-3p, miR-1a-3p, novel\_27, miR-206-3p, miR-1197-3p, miR-1, miR-495-3p, let-7f-2-3p, let-7f-2-3p, miR-4510, miR-2484, miR-206, miR-144

MDH1B ENSOARGO(malate d

EFNA5 ENSOARGO( ephrin-A

CSNK1G3 ENSOARGO( casein k

CFAP47 ENSOARGO( cilia an

miR-449a, miR-362-5p, miR-877-3p, miR-211, miR-1193, miR-2447, miR-382-5p, miR-769-5p, miR-34c, miR-30b-5p, miR-4324, miR-4443, miR-203-3p, miR-144-5p, miR-34b, miR-499a-3p, miR-211-5p, miR-7977, miR-320b, miR-20a-3p, miR-378b, miR-363, miR-1983, miR-877-3p, miR-335-3p, miR-146b-5p, miR-412-3p, miR-450b-3p, miR-22841, miR-23a-3p, miR-146b, miR-2957, miR-146a, miR-500-5p, miR-194-3p, miR-185-5p, miR-412-5p, miR-125b-2-3p, miR-412-3p, miR-6134, miR-769-5p, miR-144-5p, miR-133a-3p, miR-28-5p, miR-204-5p, miR-708-5p, miR-874-5p, miR-664a, miR-3969, miR-665, miR-324-3p, miR-370-5p, miR-204-3p, miR-769, miR-499b-3p, miR-34c-5p, miR-141-3p, miR-2355-5p, miR-370-5p, miR-548o-3p, miR-1827, miR-3074-1-3p, miR-30f, miR-133b-3p, miR-23b, miR-362-5p, miR-30d-5p, miR-30e-5p, miR-146a-5p, miR-200a, miR-664b-3p, miR-200a-3p, miR-34b-5p, miR-30d, miR-466i-5p, miR-217, miR-30f, miR-3601, miR-30b, miR-23c, miR-23b-3p, miR-412, miR-1224-5p, miR-34a-5p, miR-30c, miR-30a-5p, miR-217-5p, miR-2904, miR-30c-5p, miR-374b-5p, miR-3064-5p, miR-27a-3p, miR-378e, miR-2b, miR-361-3p, miR-1983, miR-668-5p, miR-9-5p, miR-452-5p, miR-1296-5p, miR-363-3p, novel\_111, miR-218-5p, miR-154-3p, miR-450a-5p, miR-4726-5p, miR-27a-3p, miR-151a-3p, novel\_78, miR-330-3p, miR-421, miR-216a-3p, miR-9788-3p, miR-1298-3p, miR-143-5p, miR-2284r, miR-378b, miR-21b, miR-101c, miR-450b-5p, miR-378c, miR-744-3p, miR-652-5p, miR-193a, miR-378d, miR-182-5p, miR-29b-1-5p, novel\_115, miR-214-3p, miR-3085-3p, miR-182-5p, miR-296-3p, miR-21-3p, miR-154a-3p, miR-3065-3p, miR-660-5p, miR-378a-3p, miR-32-5p, miR-221-5p, miR-376e-3p, miR-2284s, miR-655, miR-21a-3p, miR-1827, novel\_99, miR-625-5p, miR-345-5p, miR-154b-3p, miR-3074-2-3p, miR-214, miR-539-5p, miR-378c, miR-338-3p, miR-224-5p, miR-338-5p, miR-655-3p, miR-665, miR-151-3p, miR-130b-5p, miR-129-5p, miR-485-3p, miR-616-3p, miR-200b, miR-7859, miR-487a-3p, miR-378a-3p, miR-5703, miR-1434-5p, miR-2300b-3p, miR-378i, miR-378d, miR-345-3p, miR-369-3p, miR-487a, miR-2285w, miR-143-3p, miR-486-3p, miR-376c-3p, miR-125b-2-3p, miR-29b-1-5p, miR-92a-1-5p, miR-422a, novel\_17, miR-26a-5p, miR-374a-5p, miR-210-5p, miR-196a-3p, miR-21-3p, miR-221-5p, miR-760-3p, miR-26b-5p, miR-320b, miR-378b, novel\_68, miR-374c-3p, miR-2387, miR-378f, miR-7975, miR-412-3p, novel\_101, miR-495-3p, miR-219b-3p, miR-2428, novel\_27, miR-374c-5p, miR-371b-3p, miR-382-5p, miR-28c, miR-6123, miR-625-3p, miR-92a-3p, miR-133b-5p, miR-340-3p, miR-2355-3p, miR-412-5p, miR-542-3p, miR-2113, miR-708-3p, miR-873a-5p, miR-27b-3p, miR-455-5p, miR-628-5p, miR-382, miR-6240, miR-130b-5p, miR-345-5p, miR-296-3p, miR-22841, miR-455-5p, miR-32, miR-330-3p, miR-296-3p, miR-224-5p, miR-660, miR-378a-5p, miR-141-3p, miR-2285aa, miR-2355-5p, miR-487a-3p, miR-376c-3p, miR-25-3p, miR-374c-3p, miR-2154, miR-221-5p, miR-185-5p, miR-671-5p, miR-190a-

miR-146a-5p, miR-376a-5p, miR-20a, let-7k, miR-98-5p, miR-106a, miR-125b, miR-618, miR-328-3p, miR-2284h-5p, miR-15a-5p, miR-210-3p, miR-1b-3p, miR-106a, miR-133a-3p, miR-664-5p, miR-218-1-3p, miR-1197-5p, miR-5703, miR-2904, miR-2366, miR-1961, let-7b-5p, miR-206-3p, miR-6525, miR-425-5p, miR-3074-2-3p, miR-145a-3p, let-7b, miR-424-5p, miR-17-3p, miR-320e, miR-665, miR-664a-5p, miR-324-3p, let-7f, miR-15b-5p, let-7i-5p, miR-204-3p, miR-139-5p, miR-27a-5p, miR-6516, miR-377-3p, miR-582-5p, miR-296-3p, miR-582-5p, miR-133b-3p, miR-8485, miR-106a-5p, miR-494-3p, miR-424-5p, let-7a-5p, let-7e, miR-199b-5p, miR-146b, miR-491-5p, miR-106b-5p, miR-16b, miR-1306-5p, miR-342, miR-455-3p, miR-9788-3p, miR-376b-3p, miR-145b, novel\_78, miR-1343-3p, miR-409b, miR-3120-5p, miR-1839-5p, miR-2426, miR-30b-3p, miR-1a-3p, miR-541, miR-296-5p, novel\_111, miR-194b-5p, miR-1296-5p, miR-541-3p, miR-2447, miR-490-5p, miR-3968, miR-2285y, miR-2285n, miR-376d, let-7d-5p, miR-203-3p, miR-3082-5p, miR-378g, miR-7977, miR-7689-3p, miR-2319b, miR-139-5p, miR-376a-3p, miR-199b-5p, miR-192-3p, miR-199a-5p, let-7g, miR-29a-5p, miR-4286, miR-1, novel\_96, let-7f-5p, miR-2898, miR-450a-2-3p, miR-17-3p, let-7c-5p, miR-6119-5p, miR-376b-3p, miR-6516-5p, miR-322-5p, miR-505-5p, miR-376a-5p, miR-2285ad, let-7d, miR-1343-5p, miR-93, miR-133a-3p, miR-16-5p, miR-331-5p, miR-125b-5p, miR-410-5p, miR-199a-5p, miR-374c-3p, miR-125a, miR-485-5p, miR-1248, miR-20b-5p, miR-10b-3p, miR-17-5p, miR-3154, miR-93-5p, miR-503-3p, miR-331-5p, miR-424-3p, miR-432-3p, miR-466f-3p, miR-1343-5p, miR-125a-5p, miR-106a-5p, miR-194a, miR-17-5p, miR-377-3p, miR-146a, miR-7-5p, miR-20b, miR-134-3p, let-7g-5p, miR-185-5p, miR-26a-2-3p, miR-497-5p, miR-16b, miR-30b-3p, miR-145a-5p, miR-194-5p, miR-374b-3p, miR-7b-5p, miR-199b-5p, miR-24-

miR-322-5p, miR-450a-1-3p, miR-6517, miR-429-3p, miR-18b-5p, miR-1290, miR-1343-5p, miR-450b-5p, miR-200a, miR-29a-5p, miR-450c-5p, miR-3064-5p, miR-200a-3p, miR-30f, miR-376c-3p, miR-125a, miR-1271, miR-345-5p, miR-301, miR-137-3p, miR-200a-5p, novel\_42, miR-16-5p, novel\_63, miR-100-3p, miR-125b-5p, miR-412-5p, miR-134-3p, miR-411-5p, miR-149-5p, novel\_116, miR-31-5p, miR-103a-3p, miR-16b, miR-497-5p, miR-188-5p, miR-7b-5p, miR-2113, miR-223-3p, miR-197-3p, miR-450c-3p, novel\_23, miR-2285r, miR-668-3p, miR-378a-5p, miR-7-5p, miR-105-5p, miR-194a, miR-374c-3p, miR-677, miR-181b-3p, novel\_68, miR-3074-5p, miR-329-5p, miR-378f, miR-1306, miR-3591-3p, miR-199b-5p, miR-4324, miR-28c, miR-7859, miR-23c, miR-184-3p, miR-133a-3p, miR-378i, miR-378a-3p, miR-376a-5p, miR-181b-1-3p, miR-376c-3p, miR-2424, miR-329a-5p, miR-3653-3p, miR-324-3p, miR-422a, miR-92a-1-5p, miR-376e-3p, miR-2284s, miR-15b-5p, miR-2331-3p, miR-216b-3p, miR-296-3p, miR-345-5p, miR-186-5p, miR-450a-1-3p, miR-6525, miR-769-5p, miR-224-5p, miR-3184-5p, miR-3074-5p, miR-214, miR-130b-5p, miR-425-3p, miR-455-3p, miR-1343-3p, novel\_78, miR-181b-2-3p, miR-1388-5p, miR-2284r, miR-541, miR-758-3p, miR-378d, miR-124a, miR-23a-3p, miR-199b-5p, miR-214-3p, miR-103a-2-5p, miR-323b-3p, miR-16b, miR-378g, miR-25, miR-652-3p, miR-139-5p, miR-211-5p, miR-9-3p, miR-1306-3p, miR-378j, novel\_111, miR-423-5p, miR-7705, miR-2447, miR-3956-3p, miR-3968, novel\_82, miR-218-5p, miR-6516-5p, miR-378h, miR-582-3p, miR-105-2, miR-200b-3p, miR-28b, miR-3065-3p, miR-199a-5p, miR-2284a, miR-181a-2-3p, miR-2403, miR-450a-2-3p, miR-200c-3p, miR-107, miR-200c, miR-365a-3p, miR-769, miR-199a-5p, miR-370-3p, miR-141-3p, miR-10b-3p, miR-671-5p, miR-18a, miR-323-3p, miR-374a-3p, miR-378c, miR-204-5p, miR-374b-3p, miR-1306-3p, miR-331-3p, miR-103, miR-187-3p, miR-30b-3p, miR-218-1-3p, miR-376a-5p, miR-452-5p

RPP40 ENSOARGO(ribonucl

NTNG1 ENSOARGO(netrin G

miR-539-5p, miR-376b-3p, miR-1298-3p, miR-45b-3p, miR-409b, miR-1388-5p, miR-6529a, miR-10b, miR-143-5p, miR-301b-5p, miR-30b-3p, miR-30c-1-3p, miR-8485, miR-2310, miR-101b-3p, miR-23a-3p, miR-33a-5p, miR-491-5p, miR-130b-3p, miR-3955-3p, miR-199b-5p, miR-103a-2-5p, miR-542-5p, miR-1306-5p, miR-182-5p, miR-499a-3p, miR-203-3p, miR-10b, miR-20a-3p, miR-499b-5p, miR-504, miR-1983, miR-544-5p, miR-140-5p, miR-409-5p, miR-199b-5p, miR-129b-5p, miR-877-3p, miR-7705, miR-2284j, miR-3958-3p, miR-628-3p, miR-107-5p, miR-301a-5p, miR-23b-3p, miR-148b-3p, miR-532-3p, miR-3600, miR-361-5p, miR-98-3p, miR-217-5p, miR-377-5p, miR-2432, miR-2424, miR-216c-5p, miR-30b-3p, miR-1277-5p, miR-21-3p, miR-618, miR-542-5p, miR-374a-5p, miR-219b-5p, miR-216a-5p, miR-185-3p, miR-345-3p, miR-10a, miR-499b-3p, miR-582-5p, miR-301a-3p, miR-6130, miR-140-5p, miR-504-5p, miR-30c-1-3p, miR-548o-3p, miR-660-5p, miR-1277-3p, miR-182-5p, miR-543-3p, miR-582-5p, miR-186-5p, let-7f-1-3p, miR-433-3p, miR-10b-5p, miR-98-3p, miR-6134, miR-4510, novel\_74, miR-6516-3p, miR-454-3p, miR-4492, miR-129-5p, miR-190a-5p, miR-2285j, let-7b-3p, miR-3604, miR-432-5p, miR-149-5p, novel\_116, miR-130a-3p, miR-377-5p, miR-30b-3p, miR-138, miR-16-1-3p, miR-2284x, miR-188-5p, miR-432, miR-653, miR-654-3p, let-7a-2-3p, miR-668-3p, miR-628-5p, miR-124-5p, miR-660, miR-466f-3p, miR-190a, miR-2411-3p, miR-144-3p, novel\_68, miR-10a-5p, miR-3120-3p, miR-412-3p, miR-148a-3p, miR-1306, miR-376b-3p, miR-378b, miR-3959-3p, miR-199b-5p, miR-301b-3p, miR-135a-2-3p, miR-3957-3p, miR-495-3p, miR-542-5p, miR-2285x, novel\_1, miR-22-5p, miR-147-5p, miR-133a-5p, miR-485-3p, miR-33a-3p, let-7a-2-3p, miR-10a-5p, miR-345-3p, miR-23b-5p, miR-29a-5p, miR-199a-5p, miR-2285b, novel\_96, miR-543-5p, miR-152-3p, miR-205-5p, miR-2285af, miR-376b-3p, miR-3071-3p, miR-30c-2-3p, miR-217, miR-876-3p, miR-329b, miR-329a, miR-1814c, miR-135b-5p, miR-299, miR-301, miR-150-5p, miR-377-3p, miR-3082-5p, miR-22-3p, miR-140-5p, miR-2319b, miR-10b, miR-329-5p, miR-370-5p, miR-7977, miR-370-5p, miR-135a-5p, miR-212-3p, miR-1193, miR-362-3p, miR-329-3p, miR-362-3p, miR-22-3p, miR-3071-5p, miR-217-5p, miR-758-5p, miR-222-5p, miR-455-3p, miR-222-5p, miR-491-5p, novel\_96, miR-377-3p, miR-362-3p, miR-217, miR-2310, miR-329a-5p

FBXL13 ENSOARGO(F-box an

CD44 ENSOARGO(CD44 mol



|       |                   |                                                                                                                                                                                                                                                                                                                                                                                                                                                                                                                                                                                                                                                                                                                                                                                                                                                                                                                                                                                                                                                                                                                                                                                                                                                                                                                                                                                                                                                                                                                                                                                                                                                                                                                                                                                                                                                                                          |
|-------|-------------------|------------------------------------------------------------------------------------------------------------------------------------------------------------------------------------------------------------------------------------------------------------------------------------------------------------------------------------------------------------------------------------------------------------------------------------------------------------------------------------------------------------------------------------------------------------------------------------------------------------------------------------------------------------------------------------------------------------------------------------------------------------------------------------------------------------------------------------------------------------------------------------------------------------------------------------------------------------------------------------------------------------------------------------------------------------------------------------------------------------------------------------------------------------------------------------------------------------------------------------------------------------------------------------------------------------------------------------------------------------------------------------------------------------------------------------------------------------------------------------------------------------------------------------------------------------------------------------------------------------------------------------------------------------------------------------------------------------------------------------------------------------------------------------------------------------------------------------------------------------------------------------------|
|       |                   | miR-486-5p, miR-532-3p, miR-15a-5p, miR-322-5p, miR-412, miR-6517, miR-299a-3p, miR-1197-5p, miR-188-3p, miR-330-5p, novel_133, miR-3065-3p, miR-345-3p, miR-1, miR-299-3p, miR-107, miR-185-3p, miR-324-3p, miR-1260a, miR-154b-5p, miR-15b-5p, miR-2284s, miR-3065-3p, miR-1895, let-7g-3p, miR-424-3p, miR-206-3p, miR-1260b, miR-665-5p, miR-16-5p, miR-424-5p, miR-874-5p, miR-132-5p, miR-324-3p, miR-103, miR-149-5p, miR-134-3p, miR-2320-3p, miR-185-5p, miR-432-5p, miR-3535, miR-103a-3p, miR-31-5p, miR-7862, miR-497-5p, miR-1260b, miR-16b, miR-1a-3p, miR-412-3p, miR-197-3p, miR-4791, miR-542-3p, miR-432, miR-296-5p, miR-2284r, miR-8485, miR-424-5p, novel_51, miR-16b, miR-326, miR-411b-3p, miR-299b-3p, novel_69, miR-378g, miR-7857-3p, miR-7-1-3p, miR-10b, miR-452-3p, miR-195a-5p, miR-107, miR-3065-5p, miR-129b-5p, miR-361-3p, miR-326-3p, miR-1285-5p, miR-3959-3p, miR-371b-3p, miR-361-3p, miR-135a-2-3p, miR-206, miR-128-1-5p, miR-3958-3p, miR-16a, miR-133a-5p, miR-15a                                                                                                                                                                                                                                                                                                                                                                                                                                                                                                                                                                                                                                                                                                                                                                                                                                                                             |
| DRC1  | ENSOARGO(dynein r |                                                                                                                                                                                                                                                                                                                                                                                                                                                                                                                                                                                                                                                                                                                                                                                                                                                                                                                                                                                                                                                                                                                                                                                                                                                                                                                                                                                                                                                                                                                                                                                                                                                                                                                                                                                                                                                                                          |
|       |                   | miR-204-3p, miR-216a-3p, miR-149-5p, miR-3082-5p, miR-7977, miR-2355-5p, miR-874-3p, novel_68, miR-146b-5p, miR-138, miR-2387, miR-8485, miR-146a-5p, miR-29a-5p, miR-744-3p, miR-214, miR-2447, novel_96, miR-214-3p, miR-28-5p, miR-146b, miR-708-5p, miR-760-3p, novel_1, miR-664a, miR-491-5p, miR-138-5p, miR-2898, miR-331-3p, miR-146a                                                                                                                                                                                                                                                                                                                                                                                                                                                                                                                                                                                                                                                                                                                                                                                                                                                                                                                                                                                                                                                                                                                                                                                                                                                                                                                                                                                                                                                                                                                                            |
| PSMF1 | ENSOARGO(proteaso |                                                                                                                                                                                                                                                                                                                                                                                                                                                                                                                                                                                                                                                                                                                                                                                                                                                                                                                                                                                                                                                                                                                                                                                                                                                                                                                                                                                                                                                                                                                                                                                                                                                                                                                                                                                                                                                                                          |
|       |                   | miR-361-3p, miR-1983, miR-4792, miR-3064-5p, miR-20a-3p, miR-7977, miR-378g, miR-615, novel_60, miR-2447, miR-3956-3p, miR-1296-5p, miR-181d-5p, novel_111, miR-2284r, miR-296-5p, miR-484, miR-4791, miR-1a-3p, miR-412-3p, miR-544a, miR-101a-5p, miR-2300a-5p, novel_4, miR-1343-3p, miR-151a-3p, miR-330-3p, miR-2320-3p, miR-376b-3p, miR-2459, miR-1185-3p, miR-320b, miR-342, miR-431-5p, miR-326, miR-2957, miR-16b, miR-3085-3p, miR-214-3p, miR-124a, miR-424-5p, miR-30c-1-3p, miR-8485, miR-450a-1-3p, miR-129b-3p, miR-1827, miR-186-5p, miR-2331-3p, miR-140-5p, miR-30c-1-3p, miR-221-5p, miR-552-3p, miR-544-3p, miR-323-5p, miR-193b-3p, miR-204-3p, miR-15b-5p, miR-132-5p, miR-324-3p, miR-151-3p, miR-665, miR-29b-2-5p, miR-320e, miR-450b-3p, miR-664a, miR-17-3p, miR-708-5p, miR-874-5p, miR-4492, miR-424-5p, miR-130b-5p, miR-433-5p, miR-129-2-3p, miR-3074-5p, miR-214, miR-6525, miR-206-3p, miR-181c-5p, novel_133, miR-124-3p, miR-2904, miR-140-3p, miR-188-3p, miR-4429, miR-133a-3p, miR-378d, miR-3600, miR-212-5p, miR-7859, miR-15a-5p, miR-148b-3p, miR-222-5p, miR-328-3p, miR-324-3p, miR-125b, miR-185-3p, miR-202-5p, miR-320d, miR-30b-3p, miR-221-5p, miR-486-3p, miR-148a-3p, miR-21c, miR-1291, miR-412-3p, miR-9851-3p, miR-6395, miR-195a-5p, novel_68, miR-3074-5p, miR-320b, miR-3120-3p, miR-323a-5p, novel_69, miR-320c, miR-6535, miR-502-5p, miR-15a, miR-28c, miR-16a, miR-206, miR-342-3p, miR-193b-3p, miR-17-3p, novel_101, miR-326-3p, miR-2428, miR-873a-5p, miR-542-3p, miR-181a-5p, miR-197-3p, miR-450c-3p, miR-21-5p, miR-16b, miR-1260b, miR-497-5p, miR-7862, miR-26b-3p, miR-3535, miR-185-5p, miR-134-3p, miR-544b, miR-197-5p, miR-330-3p, miR-124-5p, miR-125a-5p, miR-1343-5p, miR-193a-3p, miR-130b-5p, miR-6240, miR-101-5p, miR-432-3p, miR-320a, miR-767, miR-2355-5p, miR-270-3p, miR-141-3p, miR-1271, miR- |
| ILKAP | ENSOARGO(integrin |                                                                                                                                                                                                                                                                                                                                                                                                                                                                                                                                                                                                                                                                                                                                                                                                                                                                                                                                                                                                                                                                                                                                                                                                                                                                                                                                                                                                                                                                                                                                                                                                                                                                                                                                                                                                                                                                                          |

novel\_116, miR-194-3p, miR-544b, miR-2285g, miR-412-5p, miR-3535, miR-3431, let-7g-5p, miR-26b-3p, miR-377-5p, miR-340-3p, miR-187-3p, miR-31-5p, miR-30b-3p, miR-16-1-3p, miR-450c-3p, miR-22-3p, novel\_23, miR-3071-5p, miR-374b-3p, miR-539-3p, miR-345-5p, miR-22841, miR-668-3p, miR-628-5p, miR-125a-5p, miR-2411-3p, miR-323a-5p, miR-2404, miR-411b-3p, miR-374c-3p, miR-34b, novel\_68, miR-3074-5p, miR-9851-3p, miR-135b-5p, miR-6395, miR-376a-2-5p, let-7e-5p, miR-376b-3p, miR-148a-3p, miR-2387, miR-449a, miR-199b-5p, miR-495-3p, miR-17-3p, miR-376a-3p, miR-219b-3p, miR-656-5p, miR-147-5p, miR-6123, novel\_1, miR-34c, let-7i, miR-4324, miR-133a-5p, miR-576-3p, miR-450a-1-3p, miR-134-5p, miR-6516-5p, miR-376a-5p, miR-431, miR-2285ad, miR-429-3p, miR-200b-3p, miR-155-5p, let-7d, miR-345-3p, miR-134, miR-199a-5p, let-7g, miR-2385-3p, miR-30a-3p, miR-29b-2-5p, miR-4286, miR-181a-2-3p, miR-152-3p, miR-17-3p, let-7f-5p, miR-127-5p, miR-200c-3p, miR-217, let-7c-5p, miR-376b-3p, miR-664-3p, miR-200c, miR-223-5p, miR-199a-5p, miR-376c-3p, miR-34c-5p, miR-769, miR-370-3p, miR-125a, novel\_48, miR-671-5p, miR-10b-3p, miR-767, miR-345-5p, miR-362-5p, miR-3154, miR-410-3p, miR-134-5p, miR-767-5p, miR-331-3p, miR-125b-5p, miR-100-3p, miR-3969, miR-135a-5p, miR-9788-3p, miR-500-5p, miR-216a-3p, miR-2285e, miR-376b-3p, novel\_78, miR-409b, novel\_4, miR-21b, miR-1839-5p, miR-3120-5p, miR-1388-5p, miR-544a, miR-758-3p, miR-30b-3p, miR-484, miR-4791, miR-541, miR-3187-3p, miR-758-3p, miR-33a-5p, miR-652-5p, let-7a-5p, miR-1388-3p, miR-124a, miR-494-3p, miR-199b-5p, let-7e, miR-431-5p, let-7d-5p, miR-376d, miR-3082-5p, miR-541-5p, miR-139-5p, miR-664b, miR-2319b, miR-335-3p, miR-376a-3p, novel\_94, miR-544-5p, miR-504, miR-140-5p, miR-199b-5p, miR-8095, miR-1285-5p, miR-362-5p, miR-2447, miR-541-3p, miR-2285t, miR-769-5p, miR-2285v, miR-218-3p, miR-208a-3p, miR-1306-5p, miR-208b-3p, miR-1468-5p, miR-486b-3p, miR-199c, miR-6123, miR-1468, novel\_1, miR-1271, miR-129-2-3p, novel\_39, miR-486-3p, miR-1306, miR-6395, miR-1291, miR-96-5p, miR-212-5p, miR-199b-3p, novel\_83, miR-129-1-3p, miR-877-5p, miR-328-3p, miR-1271-5p, miR-708-5p, miR-6123, miR-28-5p, miR-330-3p, miR-19b-1-5p, miR-320e, miR-1260a, novel\_63, miR-28c, miR-145-3p, miR-323-3p, miR-28b, miR-1260b, miR-3184-3p, miR-6240, miR-382-3p, miR-145a-3p, miR-27b-3p, miR-1827, miR-1260b, miR-5703, miR-433-3p, miR-19b-2-5p, miR-27a-3p, miR-126a-5p, miR-2284s, miR-670-3p, miR-27a-3p, miR-126b-5p, miR-330-3p

CPO

ENSOARGO(carboxyp

PAQR3

ENSOARGO(progesti

CREB1

ENSOARGO(cAMP res

miR-300-3p, miR-2355-5p, miR-23a-5p, miR-345-5p, miR-424-3p, miR-381-3p, miR-145-3p, miR-16-5p, novel\_9, miR-370-5p, miR-214-5p, miR-129-1-3p, miR-322-5p, miR-1224-5p, miR-429-3p, miR-2285ad, miR-222, miR-200b-3p, miR-300, miR-411-3p, miR-218-2-3p, miR-3956-5p, miR-1271-3p, miR-3065-3p, miR-107, miR-200c-3p, miR-200c, miR-181b-3p, miR-677, miR-374c-3p, miR-3120-3p, miR-7-1-3p, miR-26b-5p, miR-329-5p, miR-195a-5p, miR-107, miR-378b, miR-150-5p, miR-2428, miR-495-3p, miR-1193, novel\_120, miR-22-5p, miR-421-5p, miR-379-3p, novel\_1, miR-16a, miR-142b, miR-15a, miR-544b, miR-103, miR-194-3p, miR-432-5p, miR-103a-3p, miR-31-5p, miR-27b-3p, miR-455-5p, miR-26a-2-3p, miR-497-5p, miR-16-1-3p, miR-16b, miR-873a-5p, miR-432, miR-345-5p, miR-668-3p, miR-6240, miR-455-5p, miR-197-5p, miR-330-3p, miR-15b-5p, novel\_25, miR-216b-5p, miR-544-3p, miR-182-5p, miR-3065-3p, miR-370-5p, miR-548o-3p, miR-345-5p, let-7f-1-3p, miR-98-3p, miR-425-5p, miR-129-2-3p, miR-590-3p, miR-424-5p, miR-320e, miR-222-3p, let-7b-3p, miR-532-3p, miR-15a-5p, miR-200b, miR-212-5p, let-7a-3p, miR-16-1-3p, miR-188-3p, miR-124-3p, miR-98-3p, miR-193b-5p, miR-143-3p, miR-181b-1-3p, miR-130a-5p, miR-329a-5p, miR-219b-5p, miR-216a-5p, miR-500a-5p, miR-26a-5p, miR-1185-2-3p, miR-27a-3p, miR-489, miR-452-3p, miR-3963, miR-381-3p, miR-221, miR-1285-5p, miR-452-5p, miR-6527, miR-885-5p, miR-2285t, miR-2285y, miR-371a-5p, novel\_82, miR-421, miR-1185-3p, miR-221-3p, miR-181b-2-3p, miR-27a-3p, miR-330-3p, miR-2300a-5p, miR-1839-5p, miR-544a, miR-8485, miR-424-5p, miR-494-3p, miR-124a, miR-182-5p, miR-16b miR-130b-5p, miR-6412, miR-758-3p, miR-455-5p, miR-320b, miR-377-3p, miR-326, miR-483-3p, miR-3955-5p, novel\_78, miR-151a-3p, miR-500-5p, miR-6238, miR-148b-5p, miR-544b, miR-185-5p, miR-450c-3p, miR-758-3p, miR-125b-2-3p, miR-181a-5p, miR-143-5p, miR-101c, miR-16-2-3p, miR-455-5p, miR-380-3p, miR-544a, miR-16-1-3p, miR-3957-3p, miR-181d-5p, miR-3059-5p, miR-8095, miR-326-3p, miR-362-5p, miR-371a-5p, novel\_87, miR-101-3p, miR-142b, miR-2285t, miR-450a-5p, miR-541-5p, miR-499b-5p, miR-26b-5p, miR-2319b, miR-216b-3p, miR-20a-3p, miR-320c, miR-3596, miR-3082-5p, miR-3591-3p, miR-381-3p, miR-216a-3p, miR-378b, miR-2387, miR-148a-3p, miR-335-3p, novel\_94, miR-1983, miR-96-5p, miR-412-3p, miR-29b-2-5p, miR-2385-3p, miR-195a-3p, miR-29a-5p, miR-450c-5p, miR-143-3p, miR-2285b, miR-380-3p, miR-664b-3p, miR-148b-5p, miR-26a-5p, miR-1277-5p, miR-30b-3p, miR-2484, miR-152-3p, miR-320d, miR-181b-5p, miR-7641, miR-450a-1-3p, novel\_83, miR-486-5p, miR-24-2-5p, miR-483-3p, miR-148b-3p, miR-1271-5p, miR-140-3p, miR-330-5p, miR-215-5p, miR-128-3p, miR-16-1-3p, miR-148a-5p, novel\_73, miR-300, miR-4429, miR-1271, miR-539-5p, miR-181c-5p, miR-500b-5p, miR-151-3p, miR-29b-2-5p, miR-3969, miR-130b-5p, miR-592, miR-450b-3p, novel\_74, miR-21-3p, miR-216b-3p, miR-215-5p, miR-545-3p, miR-133c, miR-192-5p, miR-544-3p, miR-300-3p, miR-377-3p, miR-216b-5p, miR-320a, miR-362-5p, miR-381-3p, miR-424-3p, miR-450a-1-3p, miR-543-3p, miR-1248, miR-671-5p

SLC1A2 ENSOARGO(solute c:5p, miR-197-5p, miR-330-3p, miR-15b-5p, novel\_25, miR-216b-5p, miR-544-3p, miR-182-5p, miR-3065-3p, miR-370-5p, miR-548o-3p, miR-345-5p, let-7f-1-3p, miR-98-3p, miR-425-5p, miR-129-2-3p, miR-590-3p, miR-424-5p, miR-320e, miR-222-3p, let-7b-3p, miR-532-3p, miR-15a-5p, miR-200b, miR-212-5p, let-7a-3p, miR-16-1-3p, miR-188-3p, miR-124-3p, miR-98-3p, miR-193b-5p, miR-143-3p, miR-181b-1-3p, miR-130a-5p, miR-329a-5p, miR-219b-5p, miR-216a-5p, miR-500a-5p, miR-26a-5p, miR-1185-2-3p, miR-27a-3p, miR-489, miR-452-3p, miR-3963, miR-381-3p, miR-221, miR-1285-5p, miR-452-5p, miR-6527, miR-885-5p, miR-2285t, miR-2285y, miR-371a-5p, novel\_82, miR-421, miR-1185-3p, miR-221-3p, miR-181b-2-3p, miR-27a-3p, miR-330-3p, miR-2300a-5p, miR-1839-5p, miR-544a, miR-8485, miR-424-5p, miR-494-3p, miR-124a, miR-182-5p, miR-16b

PJA2 ENSOARGO(praja ri:5p, miR-2385-3p, miR-195a-3p, miR-29a-5p, miR-450c-5p, miR-143-3p, miR-2285b, miR-380-3p, miR-664b-3p, miR-148b-5p, miR-26a-5p, miR-1277-5p, miR-30b-3p, miR-2484, miR-152-3p, miR-320d, miR-181b-5p, miR-7641, miR-450a-1-3p, novel\_83, miR-486-5p, miR-24-2-5p, miR-483-3p, miR-148b-3p, miR-1271-5p, miR-140-3p, miR-330-5p, miR-215-5p, miR-128-3p, miR-16-1-3p, miR-148a-5p, novel\_73, miR-300, miR-4429, miR-1271, miR-539-5p, miR-181c-5p, miR-500b-5p, miR-151-3p, miR-29b-2-5p, miR-3969, miR-130b-5p, miR-592, miR-450b-3p, novel\_74, miR-21-3p, miR-216b-3p, miR-215-5p, miR-545-3p, miR-133c, miR-192-5p, miR-544-3p, miR-300-3p, miR-377-3p, miR-216b-5p, miR-320a, miR-362-5p, miR-381-3p, miR-424-3p, miR-450a-1-3p, miR-543-3p, miR-1248, miR-671-5p

miR-326, miR-125a-3p, miR-500a-5p, miR-221-5p, miR-124a, miR-376b, miR-2478, novel\_39, miR-193a, miR-1290, miR-2300b-3p, miR-873a-5p, miR-126-3p, miR-140-3p, miR-330-5p, miR-124-3p, miR-218-1-3p, miR-3955-5p, miR-31-5p, miR-2285ad, miR-2285g, miR-2285e, miR-194-3p, miR-9788-3p, miR-500-5p, miR-576-3p, miR-665, miR-769-5p, miR-371a-5p, miR-410-3p, miR-487a-5p, miR-2447, novel\_101, miR-362-5p, miR-361-3p, miR-500b-5p, miR-769-5p, miR-338-3p, miR-326-3p, miR-8095, miR-122-5p, miR-2285c, miR-129b-5p, miR-362-5p, miR-1291, miR-299b-5p, miR-1827, miR-7144-5p, miR-2319b, miR-221-5p, miR-2355-5p, miR-541-5p, miR-769, miR-216b-5p, miR-489, miR-27a-5p, miR-154b-5p, miR-877-5p, miR-204-3p, miR-2387, miR-361-3p, miR-2285ab, miR-3591-3p, miR-3065-5p, miR-378j, miR-671-5p, miR-1827, miR-335-3p, miR-2284g, miR-215-5p, miR-21-3p, miR-192-5p, miR-7857-3p, miR-485-3p, miR-2284o, miR-6119-3p, miR-669a-3p, miR-874-5p, miR-2285f, miR-7705, miR-326-3p, miR-215-5p, miR-330-5p, miR-125b-2-3p, miR-2284u, miR-3955-5p, miR-26b-3p, miR-302a-5p, miR-412-5p, miR-326, miR-2285p, miR-3529-3p, miR-2284f, miR-2284b, miR-490-3p, miR-2284a, miR-2284y, miR-145a-3p, miR-3074-2-3p, miR-665-5p, miR-338-3p, miR-32-5p, miR-182-5p, miR-2285c, miR-30d-5p, let-7g-3p, miR-2312, miR-30f, miR-885-3p, miR-1827, miR-20a, miR-345-3p, miR-125b-2-3p, miR-486-3p, miR-30b, miR-324-3p, miR-106a, miR-760-3p, miR-30d, miR-30b-3p, miR-18a-3p, miR-106a, miR-30c-5p, miR-184-3p, miR-33b-3p, novel\_60, miR-3956-3p, miR-541-3p, miR-363-3p, miR-2285f, miR-181d-5p, miR-9-5p, miR-877-3p, novel\_82, miR-30b-5p, miR-3968, miR-3064-5p, miR-7689-3p, miR-378g, miR-25, miR-2483-3p, miR-99b-5p, miR-1983, miR-127-3p, miR-106a-5p, let-7c-3p, miR-758-3p, miR-431-5p, miR-1306-5p, miR-106b-5p, miR-182-5p, miR-3085-3p, miR-3955-3p, miR-105-1, novel\_4, miR-2320-3p, miR-9788-3p, miR-216a-3p, miR-2285e, miR-484, miR-541, miR-7857, miR-758-3p, novel\_42, miR-193a-5p, miR-3607-3p, miR-93, miR-144, miR-135a-5p, miR-138-5p, miR-134-5p, miR-486b-3p, miR-3957-5p, miR-1271, miR-141-3p, miR-25-3p, miR-3957, miR-30e-5p, miR-93-5p, miR-100-5p, miR-17-5p, miR-3154, miR-7144-5p, miR-20b-5p, miR-3064-5p, miR-4286, miR-181a-2-3p, miR-92b-3p, miR-1957a, miR-1271-3p, miR-99a, miR-30f, miR-2898, miR-181b-5p, novel\_127, miR-92a-3p, miR-200a-3p, miR-431, miR-9-5p, miR-134-5p, miR-1290, miR-134, miR-1343-5p, miR-23b-5p, miR-30a-5p, miR-885-3p, miR-99a-5p, miR-105-2, miR-30c, miR-24-3p, miR-20a-5p, miR-92a-3p, miR-3120-3p, novel\_69, miR-677, miR-144-3p, miR-6535, miR-2285ab, miR-3141, miR-2387, miR-1306, miR-18a-3p, miR-412-3p, miR-135b-5p, miR-363-5p, miR-3141, miR-32, miR-105-5p, miR-106a-5p, miR-99a-5p, miR-17-5p, miR-1343-5p, miR-2285g, miR-185-5p, miR-134-3p, miR-194-3p, miR-20b, miR-181a-5p, miR-3071-5p, miR-138

miR-410-5p, miR-135a-1-3p, miR-6740-5p, miR-28-5p, novel\_42, let-7e-3p, miR-181a-2-3p, miR-133a-3p, miR-376c-5p, miR-18a, miR-320a, miR-329b, miR-376c-5p, miR-485-5p, miR-3957-5p, miR-2355-5p, miR-2285aa, miR-1271, miR-3957, miR-205-5p, miR-450a-2-3p, miR-2898, miR-127-5p, miR-107, miR-4286, miR-3065-3p, miR-3956-5p, miR-196a-5p, miR-345-3p, miR-1290, miR-1343-5p, miR-330-5p, miR-1224-5p, miR-18b-5p, miR-302a-5p, miR-9-5p, miR-505-5p, miR-2411-5p, miR-483-3p, miR-1271-5p, miR-450a-1-3p, miR-502-5p, miR-1307-5p, miR-203b-5p, miR-22-5p, miR-147-5p, miR-135a-2-3p, miR-342-3p, miR-371b-3p, miR-326-3p, miR-2428, miR-376b-5p, miR-18b, miR-2387, miR-1306, miR-150-5p, miR-19a-3p, miR-107, miR-323a-5p, miR-320c, miR-296-3p, miR-330-3p, miR-2411-3p, novel\_51, miR-196b-5p, miR-124-5p, miR-483-3p, miR-1343-5p, miR-6240, miR-363-5p, miR-296-3p, miR-873a-5p, miR-1843b-5p, miR-450c-3p, miR-188-5p, miR-103a-3p, miR-3431, miR-103, miR-30e-3p, miR-324-3p, miR-665, miR-450b-3p, miR-451a, miR-874-5p, miR-4492, miR-708-5p, miR-4510, miR-1271, miR-3074-2-3p, miR-6525, miR-122-5p, miR-3184-5p, miR-299, miR-450a-1-3p, miR-133b-3p, miR-18a-5p, miR-625-5p, miR-1827, miR-140-5p, miR-3065-3p, miR-21-3p, miR-296-3p, miR-552-3p, miR-6130, miR-323-5p, novel\_32, novel\_25, novel\_17, miR-324-3p, miR-345-3p, miR-92a-1-5p, miR-185-3p, miR-320d, miR-2887, miR-29b-1-5p, miR-2411, miR-2424, miR-2300b-3p, miR-124-3p, miR-2904, miR-5703, miR-19b-3p, miR-4429, miR-218-1-3p, miR-148a-5p, miR-378d, miR-1b-3p, miR-212-5p, miR-4726-5p, miR-3059-5p, miR-6527, miR-9-5p, novel\_111, miR-423-5p, miR-361-3p, miR-140-5p, miR-299b-5p, miR-96-5p, miR-3963, miR-7977, miR-4443, miR-320b, miR-342, miR-326, novel\_103, miR-1306-5p, miR-2957, miR-29b-1-5p, miR-3955-3p, miR-25-5p, miR-124a, miR-744-3p, miR-299a-5p, miR-330-

miR-30e-3p, miR-29b-2-5p, miR-30a-3p, miR-15b-5p, miR-129-5p, miR-208b-5p, miR-129-2-3p, miR-2330-3p, miR-769-5p, miR-21a-3p, miR-30d-5p, miR-30f, novel\_99, miR-186-5p, miR-30c-1-3p, miR-140-5p, miR-2331-3p, miR-504-5p, miR-341-3p, miR-21-3p, miR-139-5p, miR-27a-5p, miR-877-5p, miR-155-5p, miR-204-3p, miR-210-5p, miR-2285p, miR-374a-5p, miR-30b, miR-125b, miR-324-3p, miR-412-5p, miR-466i-5p, miR-299-3p, miR-30d, miR-30b-3p, miR-216c-5p, miR-664b-3p, miR-2300b-3p, miR-2408, miR-1246, miR-30c-5p, miR-5703, miR-140-3p, miR-124-3p, miR-4429, novel\_73, miR-378d, miR-148a-5p, miR-2284u, miR-16-1-3p, miR-383-5p, miR-616-3p, miR-2285n, miR-30b-5p, miR-107-5p, miR-769-5p, miR-490-5p, miR-3059-5p, miR-2447, miR-452-5p, miR-181d-5p, miR-877-3p, miR-9-3p, miR-504, miR-136-5p, novel\_94, miR-9-3p, miR-376a-3p, miR-139-5p, miR-2284g, miR-2285u, miR-499b-5p, miR-489, miR-25, miR-376d, miR-203-3p, miR-320b, miR-2957, miR-505, miR-323b-3p, miR-487b-5p, miR-1185-5p, miR-103a-2-5p, miR-101b-3p, miR-124a, miR-744-3p, miR-30c-1-3p, miR-491-3p, miR-758-3p, miR-2310, miR-758-3p, miR-125b-2-3p, miR-323b, miR-1839-5p, miR-409b, miR-330-3p, miR-376b-3p, miR-147a, miR-2459, miR-411b-5p, miR-455-3p, miR-410-5p, miR-551b-3p, miR-135a-5p, miR-144, miR-125b-5p, miR-331-3p, miR-331-5p, miR-28a-3p, miR-365a-5p, miR-331-5p, miR-424-3p, miR-30e-5p, miR-488-3p, miR-320a, miR-3154, miR-876-3p, miR-485-5p, miR-1248, miR-190a-3p, miR-125a, miR-615-5p, miR-769, miR-300-3p, miR-331-5p, miR-374c-3p, miR-154b-5p, miR-376b-3p, miR-3071-3p, miR-30c-2-3p, miR-181b-5p, miR-28-3p, miR-543-5p, miR-3529-3p, miR-181a-2-3p, miR-30a-3p, miR-29b-2-5p, miR-450b-5p, miR-2285b, miR-192-3p, miR-1957a, miR-376c-5p, miR-376b-5p, miR-2284y, miR-3578, miR-3591-5p, miR-30a-5p, miR-2427, miR-411-3p, miR-155-5p, miR-30c, miR-299a-3p, miR-758-5p, miR-483-3p, miR-302a-

miR-2898, miR-450a-2-3p, novel\_96, miR-148b-5p, miR-2284y, miR-490-3p, miR-2284a, miR-29b-2-5p, miR-300, miR-9-5p, miR-378h, miR-2411-5p, miR-129-1-3p, miR-214-5p, miR-1224-5p, miR-18b-5p, miR-331-5p, miR-486b-3p, novel\_63, miR-2332, miR-331-3p, miR-125b-5p, miR-378c, miR-3607-3p, miR-345-5p, miR-381-3p, miR-331-5p, miR-3154, miR-18a, miR-133c, miR-3068-3p, miR-874-3p, miR-2285aa, miR-125a, miR-125a-5p, miR-330-3p, novel\_51, miR-654-3p, miR-345-5p, miR-6240, miR-363-5p, miR-382, miR-873a-5p, miR-542-3p, miR-145a-5p, miR-149-5p, novel\_1, miR-421-5p, miR-656-5p, miR-4324, miR-24-3p, miR-2428, miR-335-5p, miR-3957-3p, miR-1291, miR-378f, miR-6395, miR-18b, miR-146b-3p, miR-411b-3p, miR-6535, miR-669, novel\_68, miR-760-3p, miR-221-5p, miR-324-3p, miR-125b, miR-422a, miR-29b-1-5p, miR-486-3p, miR-2411, miR-2432, miR-345-3p, miR-142-3p, miR-19b-3p, miR-2284u, miR-378i, novel\_133, miR-193b-5p, miR-378a-3p, miR-140-3p, miR-7859, miR-328-3p, novel\_74, miR-874-5p, miR-4492, miR-132-5p, miR-3604, miR-665, miR-29b-2-5p, miR-6134, miR-378c, miR-129-2-3p, miR-18a-5p, miR-345-5p, miR-543-3p, miR-1827, miR-378a-3p, miR-221-5p, miR-2331-3p, miR-552-3p, miR-491-5p, miR-5126, miR-29b-1-5p, miR-378d, miR-2284b, miR-378c, miR-450b-5p, miR-3120-5p, miR-296-5p, miR-2284r, miR-378b, miR-301b-5p, miR-541, miR-330-3p, miR-1343-3p, miR-145b, miR-335, miR-490-5p, miR-301a-5p, miR-361-3p, miR-541-3p, miR-9-5p, miR-361-3p, miR-3596, miR-378e, miR-3082-5p, miR-203-3p, miR-4443, miR-2284g  
 miR-3529-3p, miR-548o-3p, miR-214, miR-7977, miR-532-5p, miR-2478, miR-148b-5p, miR-423-5p, miR-3184-5p, miR-708-3p, miR-197-5p, miR-3065-5p, miR-214-3p  
 miR-223-5p, miR-216b-5p, miR-323-5p, miR-141-3p, miR-370-5p, miR-378a-3p, novel\_99, miR-186-5p, let-7g-3p, miR-3154, miR-27b-5p, miR-378c, miR-3074-2-3p, miR-378c, miR-539-5p, miR-204-5p, miR-370-5p, miR-410-5p, miR-486-5p, miR-545-5p, miR-2284h-5p, miR-378h, miR-376a-5p, miR-299a-3p, novel\_73, miR-1197-5p, miR-217-5p, miR-378a-3p, miR-5703, miR-1434-5p, miR-1343-5p, miR-376a-5p, miR-378i, miR-29a-5p, miR-376a-5p, miR-2285w, miR-216c-5p, miR-299-3p, miR-200a-3p, miR-2898, miR-217, miR-422a, miR-203-3p, miR-669, miR-374c-3p, miR-299b-3p, miR-378e, miR-323a-5p, miR-211-5p, miR-20a-3p, miR-378f, miR-376a-2-5p, miR-2319a, miR-21c, miR-211, miR-1193, miR-199c, miR-147-5p, miR-6402, miR-101-3p, miR-222-5p, miR-199b-3p, miR-330-3p, miR-188-5p, miR-21-5p, miR-378c, miR-378b, miR-653, miR-503-3p, miR-8485, miR-378d, let-7c-3p, miR-363-5p, miR-101b-3p, miR-6240, miR-1343-5p, miR-330-3p

ANGPT4 ENSOARGO(angiotensinogen)

HHLA2 ENSOARGO(HERV-H L)

ARMC10 ENSOARGO(armadillo)

PRRG1 ENSOARGO(proline)

novel\_23, miR-181a-5p, miR-708-3p, miR-27b-3p, miR-29b, miR-26b-3p, miR-544b, miR-20b, novel\_116, miR-134-3p, miR-3535, miR-17-5p, miR-106a-5p, miR-190a, miR-377-3p, miR-452-5p, miR-493-5p, miR-345-5p, miR-150-5p, miR-2285ab, miR-376b-5p, miR-6516-3p, miR-7975, miR-670-3p, miR-29a-3p, miR-133a-5p, miR-20a-5p, miR-147-5p, miR-421-5p, miR-379-3p, miR-29a, miR-29c-3p, miR-2285x, miR-342-3p, miR-2284w, miR-374c-5p, novel\_27, miR-211, miR-29d-3p, miR-3578, miR-1290, miR-411-3p, miR-6516-5p, miR-3071-3p, miR-6119-5p, miR-125a-3p, miR-200a-3p, miR-181b-5p, miR-28-3p, miR-2285b, miR-192-3p, miR-2284a, miR-200a, miR-1957a, novel\_39, miR-3065-3p, miR-2284y, miR-29a-5p, miR-376c-5p, miR-17-5p, miR-93-5p, miR-301, miR-20b-5p, miR-7144-5p, miR-190a-3p, miR-329a, miR-345-5p, miR-141-3p, miR-29b-3p, miR-204-5p, miR-28-5p, miR-193a-5p, miR-28a-3p, miR-1197-3p, miR-93, miR-7857, miR-4791, miR-329-3p, miR-544a, miR-2426, miR-450b-5p, miR-362-3p, miR-27a-3p, miR-421, miR-148b-5p, miR-106b-5p, miR-362-3p, miR-505, miR-342, miR-744-3p, miR-2284b, miR-106a-5p, miR-382-3p, miR-8485, miR-381-3p, miR-361-3p, miR-493-5p, miR-211-5p, miR-499b-5p, miR-2319b, miR-2284g, miR-27a-3p, miR-4443, miR-378g, novel\_82, miR-2284q, miR-490-5p, miR-190b-5p, miR-181d-5p, miR-2285f, miR-877-3p, miR-1197-5p, miR-362-3p, miR-2284u, miR-218-1-3p, miR-106a, miR-2284h-5p, novel\_17, miR-221-5p, miR-106a, miR-20a, miR-2285w, miR-125b-2-3p, miR-411, let-7f-1-3p, miR-21a-3p, miR-1827, miR-345-5p, miR-2312, miR-552-3p, miR-3065-3p, miR-221-5p, miR-377-3p, miR-544-3p, miR-6516, miR-190a-5p, miR-708-5p, miR-6516-3p, miR-425-5p, miR-539-5p, miR-181c-5p



miR-92b-3p, miR-192-3p, let-7g, miR-3064-5p, let-7f-5p, novel\_96, miR-152-3p, miR-125a-3p, miR-205-5p, miR-30f, miR-758-5p, miR-505-5p, miR-322-5p, miR-129-1-3p, miR-450a-1-3p, miR-134-5p, miR-6517, miR-412, miR-885-3p, miR-30c, miR-193a-5p, miR-16-5p, miR-134-5p, miR-2433, novel\_63, miR-25-3p, miR-2355-5p, miR-1248, miR-30e-5p, let-7j, miR-6240, miR-483-3p, miR-193a-3p, miR-7-5p, novel\_51, miR-32, miR-149-5p, miR-16b, miR-2284x, miR-27b-3p, miR-497-5p, miR-7b-5p, miR-1843b-5p, miR-450c-3p, miR-22-3p, miR-193b-3p, miR-6123, miR-28c, miR-1247-3p, miR-411b-3p, miR-374c-3p, miR-320c, novel\_68, let-7e-5p, miR-148a-3p, miR-3591-3p, miR-216a-3p, miR-150-5p, miR-2424, miR-503-5p, miR-345-3p, miR-98-5p, miR-202-5p, let-7k, miR-3653-3p, miR-210-5p, miR-30b, miR-92a-1-5p, miR-500a-5p, miR-324-3p, miR-328-3p, miR-2284h-5p, miR-212-5p, miR-33b-3p, miR-34a-5p, miR-218-1-3p, miR-133a-3p, miR-1961, miR-30c-5p, miR-346, miR-224-5p, miR-769-5p, miR-6525, miR-129-2-3p, let-7b, miR-214, miR-2285j, let-7f, miR-665, miR-15b-5p, let-7i-5p, miR-32-5p, miR-2331-3p, miR-296-3p, miR-1827, miR-885-3p, miR-450a-1-3p, miR-30d-5p, miR-101b-3p, miR-124a, miR-491-5p, miR-214-3p, miR-16b, miR-505, miR-147a, miR-455-3p, miR-1343-3p, miR-330-3p, novel\_78, miR-199b-3p, miR-541, miR-301b-5p, miR-361-3p, miR-877-3p, miR-363-3p, miR-3968, miR-2440, miR-301a-5p, miR-139-5p, miR-211-5p, miR-2285u, miR-668-5p, miR-28b, miR-1271-3p, miR-1957a, miR-4286, miR-181a-2-3p, miR-92a-3p, let-7c-5p, miR-483-3p, miR-6516-5p, miR-24-2-5p, let-7d, miR-582-3p, miR-128-3p, miR-134, miR-30a-5p, miR-374a-3p, miR-500b-5p, miR-145-3p, miR-138-5p, miR-374b-3p, miR-204-5p, miR-28-5p, miR-331-3p, miR-769, miR-374c-3p, miR-34c-5p, miR-615-5p, miR-10b-3p, miR-671-5p, miR-320a, miR-362-5p, miR-3154, miR-124-5p, miR-166f-3p, miR-330-5p, miR-129b-3p, miR-2387, miR-503-5p, miR-483-3p, miR-296-3p, miR-99a-3p, miR-3068-3p, novel\_4, miR-548w, miR-543-5p, miR-99a-3p, miR-483-3p, miR-3968, novel\_51, miR-99b-3p, miR-326, miR-210-5p, miR-503-5p, miR-326-3p, miR-29a-5p, miR-8485, miR-181a-2-3p, miR-503-5p

LMBR1L ENSOARGO(limb dev)

PAMR1 ENSOARGO(peptidas)

miR-27a-3p, miR-7857-3p, miR-378e, miR-3082-5p, miR-489, miR-541-5p, miR-7977, miR-3064-5p, miR-20a-3p, novel\_94, miR-361-3p, miR-8095, miR-154a, miR-362-5p, miR-2285f, miR-3059-5p, miR-4726-5p, miR-107-5p, miR-30b-5p, miR-500-5p, miR-9788-3p, miR-2285e, miR-27a-3p, miR-378c, miR-2426, miR-299a-5p, miR-544a, miR-412-3p, miR-7857, miR-378b, miR-484, miR-3187-3p, miR-30c-1-3p, miR-652-5p, miR-1468, miR-3085-3p, miR-320b, miR-1306-5p, miR-204-3p, novel\_32, miR-22-3p, miR-877-5p, miR-544-3p, miR-193b-3p, miR-370-5p, miR-532-5p, miR-378a-3p, miR-545-3p, miR-2312, miR-30f, miR-6134, miR-2330-3p, miR-378c, miR-145a-3p, miR-17-3p, miR-324-3p, miR-655-3p, novel\_83, miR-532-3p, miR-616-3p, miR-148b-3p, miR-3960, miR-4429, miR-19b-3p, miR-2904, miR-124-3p, miR-5703, miR-2300b-3p, miR-376a-5p, miR-2411, miR-29b-1-5p, miR-130a-5p, miR-1277-5p, miR-30d, miR-320d, miR-125b, miR-2404, miR-670-3p, miR-7-1-3p, miR-7975, miR-6395, miR-450b-3p, miR-1291, miR-19a-3p, miR-107, miR-2285ab, miR-2387, miR-3959-3p, miR-24-3p, miR-371b-3p, novel\_101, miR-17-3p, miR-495-3p, miR-2285x, miR-1193, novel\_120, novel\_1, miR-502-5p, miR-6238, miR-544b, miR-103, miR-2355-3p, miR-432-5p, miR-2285g, miR-185-5p, miR-7862, miR-6239, miR-296-3p, miR-345-5p, miR-101-5p, miR-382, miR-125a-5p, miR-2285l, miR-2284n, miR-365a-3p, miR-141-3p, miR-615-5p, miR-7144-5p, miR-23a-5p, miR-3074-1-3p, miR-671-5p, miR-362-5p, miR-3154, miR-320a, miR-381-3p, miR-488-3p, miR-2448-3p, miR-378c, miR-500b-5p, miR-486b-3p, miR-3969, miR-409-3p, miR-410-5p, miR-551b-3p, miR-370-5p, miR-545-5p, miR-24-2-5p, miR-483-3p, miR-378h, miR-2411-5p, miR-411-3p, miR-300, miR-30a-5p, miR-380-5p, miR-2478, miR-24-2-5p, miR-30a-3p, miR-4286, miR-107, miR-17-3p, miR-30c-2-3p, miR-339a, miR-6119-5p, miR-2483-3p, miR-2285u, miR-24-1-5p, miR-1082, miR-109-5p, miR-877-3p, miR-3578, miR-6529a

RHEBL1 ENSOARGO(Ras homo

OR56A3 ENSOARGO(olfactor

miR-1343-5p, miR-299a-3p, miR-6517, novel\_79, miR-505-5p, miR-134-5p, novel\_121, miR-219-3p, miR-127-5p, novel\_96, miR-200a-3p, miR-148b-5p, novel\_39, miR-2284y, miR-200a, miR-192-3p, miR-345-5p, miR-2318, miR-1248, miR-2285aa, miR-2355-5p, miR-125a, miR-300-3p, miR-223-5p, miR-376c-3p, novel\_63, miR-2433, miR-125b-5p, miR-6740-5p, novel\_9, miR-134-5p, miR-1197-3p, miR-1260b, miR-7b-5p, miR-22-3p, novel\_23, miR-16-1-3p, miR-4508, miR-188-5p, miR-31-5p, miR-339-5p, miR-134-3p, miR-7-5p, miR-146a, miR-377-3p, miR-2411-3p, novel\_51, miR-378a-5p, miR-668-3p, miR-1306, miR-412-3p, miR-146b-5p, miR-26b-5p, miR-3120-3p, miR-411b-3p, miR-299b-3p, miR-677, miR-669, miR-181b-3p, miR-576-3p, miR-206, miR-2284w, miR-199b-5p, miR-217-5p, miR-142-3p, miR-16-1-3p, miR-133a-3p, miR-2284u, miR-148a-5p, miR-7859, miR-1247-5p, miR-26a-5p, miR-2285p, miR-324-3p, miR-345-3p, miR-92a-1-5p, miR-202-5p, miR-2484, miR-345-3p, miR-376c-3p, miR-181b-1-3p, miR-486-3p, miR-143-3p, miR-598-3p, miR-339b, miR-345-5p, miR-504-5p, miR-216b-3p, miR-377-3p, miR-499b-3p, miR-376e-3p, miR-216b-5p, miR-15b-3p, miR-219b-3p, miR-3604, miR-665, miR-4492, miR-130b-5p, miR-6525, miR-3184-5p, miR-541, miR-323b, miR-1a-3p, miR-758-3p, miR-548w, miR-181b-2-3p, miR-147a, miR-455-3p, miR-148b-5p, miR-323b-3p, miR-505, miR-491-5p, miR-199b-5p, miR-146b, miR-103a-2-5p, miR-124a, miR-23a-3p, miR-8485, miR-1b-5p, miR-221, miR-504, miR-1983, miR-139-5p, miR-2284g, miR-2285u, miR-211-5p, miR-378g, miR-3596, miR-499a-3p, miR-203-3p, miR-218-5p, miR-615, miR-2440, miR-2447, miR-423-5p, miR-615-3p, miR-345-3p, miR-134, miR-222, miR-2411-5p, miR-545-5p, miR-2285af, miR-1260a, miR-217, miR-339a, miR-2898, miR-17-3p, miR-543-5p, miR-1, miR-4286, miR-199a-5p, miR-1271-3p, miR-2284a, miR-3154, miR-7144-5p, miR-485-5p, miR-508-3p, miR-141-3p, miR-1434-3p, miR-376b-3p, miR-1434-5p, miR-376b-3p, miR-380-3p, miR-376a-3p, miR-216c-5p, miR-452-5p, miR-376b-3p, miR-376d, miR-380-3p, miR-200a

TCF20 ENSOARGO( transcri

STXBP3 ENSOARGO( syntaxin

miR-378g, miR-4443, miR-203-3p, miR-2319b, miR-7977, miR-96-5p, miR-361-3p, miR-361-3p, miR-423-5p, miR-4726-5p, miR-101-3p, novel\_82, miR-107-5p, miR-2320-3p, miR-2300a-5p, miR-1343-3p, miR-3120-5p, miR-101c, miR-2284r, miR-296-5p, miR-30b-3p, miR-323b, miR-4532, miR-744-3p, miR-25-5p, miR-491-5p, miR-381-5p, miR-103a-2-5p, miR-431-5p, miR-326, miR-5126, miR-342, miR-323b-3p, miR-6130, miR-193b-3p, miR-2284s, miR-221-5p, miR-2331-3p, miR-216b-3p, miR-3065-3p, miR-339b, miR-1827, miR-885-3p, miR-29c-5p, miR-346, miR-3184-5p, miR-129-2-3p, miR-4510, miR-3958-5p, miR-1271, miR-664a, miR-4492, miR-874-5p, miR-29d-5p, miR-383-5p, miR-671-3p, miR-18a-3p, miR-378d, miR-193b-5p, miR-2366, miR-1197-5p, miR-2904, miR-130a-5p, miR-143-3p, miR-486-3p, miR-466i-5p, miR-299-3p, miR-221-5p, miR-185-3p, miR-324-3p, miR-299b-3p, miR-670-3p, miR-6535, miR-410-5p, miR-1291, miR-9851-3p, miR-2319a, miR-18a-3p, miR-371b-3p, miR-24-3p, miR-2428, miR-326-3p, miR-342-3p, miR-193b-3p, miR-6402, miR-4324, miR-134-3p, miR-432-5p, miR-2355-3p, miR-31-5p, miR-339-5p, miR-381-5p, miR-138, miR-30b-3p, miR-7862, miR-744-5p, miR-455-5p, miR-4508, miR-1285, miR-432, miR-873a-5p, miR-432-3p, miR-363-5p, miR-193a-3p, miR-1343-5p, miR-455-5p, novel\_51, miR-874-3p, miR-615-5p, miR-1271, miR-370-3p, miR-2355-5p, miR-23a-5p, novel\_42, miR-138-5p, miR-486b-3p, miR-2433, miR-6740-5p, miR-1271-5p, miR-129-1-3p, miR-299a-3p, miR-431, novel\_79, miR-885-3p, miR-23b-5p, miR-330-5p, miR-218-2-3p, miR-1343-5p, novel\_39, miR-3065-3p, miR-181a-2-3p, novel\_127, miR-543-5p, novel\_96, miR-339a

NFAM1 ENSOARGO(NFAT act) miR-6529a, miR-301b-5p, novel\_23, miR-4429, miR-16-1-3p, miR-16-1-3p, let-7a-3p, miR-31-5p, miR-548e-3p, miR-30d-3p, miR-582-3p, miR-320b, miR-374a-5p, miR-378a-5p, miR-320d, miR-466i-5p, miR-30a-3p, miR-654-3p, miR-2285b, miR-2448-3p, miR-320a, miR-129b-5p, miR-7977, miR-300-3p, miR-320c, miR-30e-3p, miR-30a-3p, miR-33a-3p, miR-301a-5p, miR-335, miR-203b-5p, miR-335-5p, miR-338-3p

PMPCB ENSOARGO(peptidas)

miR-2285e, miR-9788-3p, miR-216a-3p, miR-455-3p, miR-539-5p, miR-181b-2-3p, novel\_4, miR-101c, miR-21b, miR-2284aa, miR-1388-5p, miR-3962, miR-30b-3p, miR-2284r, miR-2310, miR-23a-3p, miR-676-3p, miR-106a-5p, miR-1388-3p, miR-199b-5p, miR-3955-3p, miR-106b-5p, miR-182-5p, miR-29b-1-5p, miR-505, miR-326, miR-320b, miR-25, miR-3596, miR-378g, miR-7977, miR-211-5p, miR-541-5p, miR-499b-5p, miR-139-5p, miR-9-3p, miR-504, miR-299b-5p, miR-129b-5p, miR-378j, miR-199b-5p, miR-361-3p, miR-423-5p, miR-8095, miR-9-3p, novel\_111, miR-361-3p, miR-2284j, miR-2285f, miR-374a-3p, miR-450a-5p, miR-616-3p, miR-1247-5p, miR-148b-3p, miR-95-3p, miR-23b-3p, miR-30d-3p, miR-106a, miR-361-5p, let-7a-3p, miR-133a-3p, miR-16-1-3p, miR-33b-3p, novel\_73, miR-4429, miR-140-3p, miR-1197-5p, miR-5703, miR-193b-5p, miR-2300b-3p, miR-2411, miR-2424, miR-486-3p, miR-181b-1-3p, miR-29b-1-5p, miR-369-3p, miR-20a, miR-221-5p, miR-30b-3p, miR-106a, miR-320d, miR-202-5p, miR-345-3p, novel\_17, novel\_25, miR-139-5p, miR-216b-5p, miR-2284s, miR-132-5p, miR-6516, miR-582-5p, miR-548o-3p, miR-221-5p, miR-504-5p, miR-32-5p, miR-582-5p, novel\_99, miR-345-5p, miR-18a-5p, miR-2312, miR-2285c, miR-450a-1-3p, let-7f-1-3p, miR-338-3p, miR-6134, miR-3184-5p, miR-6525, miR-3074-2-3p, miR-425-5p, miR-145a-3p, miR-590-3p, miR-130b-5p, miR-4492, miR-708-5p, miR-6516-3p, miR-1843b-3p, miR-450b-3p, miR-665, miR-29b-2-5p, miR-3604, miR-132-5p, miR-30a-3p, miR-30e-3p, miR-2355-3p, miR-20b, miR-6238, miR-411-5p, miR-149-5p, miR-185-5p, miR-134-3p, miR-2285g, miR-412-5p, miR-2284d, miR-26b-3p, miR-665, miR-3955-5p, miR-2889, miR-16-1-3p, miR-219a-1-3p, miR-138, miR-30b-3p, miR-2284ab, miR-197-3p, miR-450c-3p, miR-1434-3p, miR-542-3p, miR-708-3p, miR-345-5p, miR-2284l, miR-432-3p, miR-432-3p, let-7f-2-3p, miR-628-5p, let-7f-2-3p, miR-389, miR-130b-5p, miR-466f-3p, miR-196b, miR-4492, miR-486b-3p, miR-128-1-5p, miR-138-5p, miR-769-5p, miR-2433, miR-6529b, miR-423-5p, miR-3184-5p, miR-769-5p, novel\_111, miR-214, miR-23a-5p, miR-3154, miR-23b, miR-2387, miR-6535, miR-3957, miR-670-3p, miR-769, miR-320b, miR-216b-3p, miR-7977, miR-3957-5p, miR-30c-1-3p, miR-216b-3p, miR-548o-3p, miR-214-3p, miR-30c-2-3p, miR-185-3p, let-7j, miR-486-3p, miR-30c-1-3p, miR-23a-3p, miR-7862, miR-30b-3p, miR-138, miR-450b-5p, novel\_73, miR-5703, miR-23b-5p, miR-30b-3p, miR-2300b-3p, miR-23b-3p, miR-7859, miR-505-5p

IDH1

ENSOARGO(isocitra

KCNK3

ENSOARGO(potassiu

miR-450b-5p, miR-378c, miR-30b-3p, miR-323b, miR-2284r, miR-378b, miR-221-3p, miR-9788-3p, miR-500-5p, miR-147a, miR-145b, miR-27a-3p, miR-2300a-5p, miR-409b, miR-103a-2-5p, miR-214-3p, miR-323b-3p, miR-326, novel\_103, miR-5126, miR-30c-1-3p, miR-378d, let-7c-3p, miR-382-3p, miR-494-3p, miR-877-3p, miR-136-5p, miR-378j, miR-221, miR-27a-3p, miR-25, miR-378e, miR-7977, miR-2319b, miR-3968, miR-107-5p, miR-769-5p, miR-7705, miR-1285-5p, miR-361-3p, miR-362-5p, miR-877-3p, miR-181d-5p, miR-194b-5p, miR-363-3p, miR-3956-3p, novel\_60, miR-34a-5p, miR-16-1-3p, miR-5703, miR-378a-3p, miR-140-3p, miR-2904, miR-1246, miR-2408, miR-378i, miR-200b, miR-3600, miR-18a-3p, miR-21-3p, miR-34b-5p, miR-125b, miR-185-3p, miR-422a, miR-216a-5p, miR-210-5p, miR-196a-3p, miR-143-3p, miR-486-3p, miR-125b-2-3p, miR-625-5p, miR-543-3p, miR-18a-5p, miR-345-5p, let-7g-3p, miR-21a-3p, miR-877-5p, miR-22-3p, miR-193b-3p, miR-27a-5p, miR-21-3p, miR-32-5p, miR-30c-1-3p, miR-378a-3p, miR-130b-5p, miR-4492, miR-222-3p, miR-181c-5p, miR-769-5p, miR-6525, miR-214, miR-378c, miR-27b-3p, miR-7862, miR-16-1-3p, miR-138, miR-30b-3p, miR-145a-5p, miR-194-5p, miR-22-3p, miR-181a-5p, miR-1285, miR-873a-5p, miR-708-3p, miR-103, miR-103a-3p, miR-193a-3p, miR-125a-5p, miR-124-5p, miR-483-3p, novel\_51, miR-194a, miR-2331-5p, miR-32, let-7a-2-3p, miR-345-5p, miR-628-5p, miR-2483-5p, miR-130b-5p, miR-378f, miR-107, miR-450b-3p, miR-1291, miR-18a-3p, miR-3591-3p, miR-216a-3p, miR-18b, miR-34b, miR-2404, miR-3120-3p, miR-92a-3p, miR-34c, miR-142b, miR-2428, miR-2284w, miR-449a, miR-326-3p, miR-495-3p, miR-2285x, miR-193b-3p, let-7a-2-3p, miR-200b-3p, miR-128-3p, miR-330-5p, miR-23b-5p, miR-483-3p, miR-378h, miR-505-5p, miR-18b-5p, miR-429-3p, miR-6517, miR-222, miR-92a-3p, novel\_127, miR-107, miR-181b-5p, miR-200c-3p, miR-28-3p, miR-30c-2-3p, miR-194-3p, miR-669, miR-769, miR-34b, miR-34c-5p, miR-330-3p, miR-2300a-5p, miR-2331-3p, miR-34a-5p, miR-1291, miR-542-3p, miR-449a, miR-769-5p, miR-6240, novel\_96, miR-34b-5p, miR-491-5p, miR-34c, miR-769-5p, miR-330-3p, miR-2440, miR-2433

NE01 ENSOARG0(neogenin

SLC35F6 ENSOARG0(solute c.

|       |                     |                                                                                                                                                                                                                                                                                                                                                                                                                                                                                                                                                                                                                                                                                                                                                                                                                                                                                                                                                                                                                                                                                                                                                                                         |
|-------|---------------------|-----------------------------------------------------------------------------------------------------------------------------------------------------------------------------------------------------------------------------------------------------------------------------------------------------------------------------------------------------------------------------------------------------------------------------------------------------------------------------------------------------------------------------------------------------------------------------------------------------------------------------------------------------------------------------------------------------------------------------------------------------------------------------------------------------------------------------------------------------------------------------------------------------------------------------------------------------------------------------------------------------------------------------------------------------------------------------------------------------------------------------------------------------------------------------------------|
|       |                     | miR-2424, miR-376a-5p, miR-421-5p, miR-376c-3p, miR-20a, miR-216c-5p, miR-30d, miR-200a-3p, miR-106a, miR-2284m, miR-6536, miR-30f, miR-500a-5p, miR-2285af, miR-30b, miR-374a-5p, miR-616-3p, miR-7859, miR-1b-3p, miR-222, miR-548e-3p, miR-2285ad, miR-106a, miR-155-5p, miR-30c, miR-496, miR-361-5p, let-7a-2-3p, miR-582-3p, novel_73, miR-2427, miR-30a-5p, miR-30c-5p, miR-376a-5p, miR-93, miR-3074-2-3p, miR-374b, miR-2284v, miR-708-5p, miR-487a-5p, miR-28-5p, miR-155-5p, miR-324-3p, miR-19b-1-5p, miR-222-3p, miR-2284k, miR-376c-3p, miR-155-5p, miR-376e-3p, miR-3959-5p, miR-296-3p, miR-141-3p, miR-503-3p, miR-20b-5p, miR-186-5p, novel_99, miR-2312, let-7g-3p, miR-30f, miR-200a-5p, miR-93-5p, miR-17-5p, miR-30d-5p, miR-30e-5p, let-7a-2-3p, miR-654-3p, miR-2284l, let-7f-2-3p, miR-106a-5p, miR-106a-5p, miR-106b-5p, miR-17-5p, miR-221-3p, miR-1185-3p, miR-20b, miR-126a-5p, miR-2284d, miR-145b, miR-409b, miR-548w, miR-2284x, miR-2284ab, miR-145a-5p, novel_23, miR-19b-2-5p, miR-374c-5p, miR-2285f, miR-190b-5p, miR-212-3p, miR-625-3p, miR-30b-5p, miR-20a-5p, miR-133a-5p, miR-1185-2-3p, miR-374b-5p, miR-320b, miR-7975, miR-2285ab, miR-221 |
| RBM44 | ENSOARGO(C RNA bind |                                                                                                                                                                                                                                                                                                                                                                                                                                                                                                                                                                                                                                                                                                                                                                                                                                                                                                                                                                                                                                                                                                                                                                                         |
|       |                     | miR-3065-3p, miR-125b-5p, miR-125b, novel_103, miR-208b-5p, miR-125a-5p, miR-3065-3p, miR-125a, miR-149-5p, miR-669, miR-216b-5p, miR-2284r, miR-1843b-5p, miR-877-3p, miR-1291, miR-450b-5p                                                                                                                                                                                                                                                                                                                                                                                                                                                                                                                                                                                                                                                                                                                                                                                                                                                                                                                                                                                            |
| RGS16 | ENSOARGO(C regulato |                                                                                                                                                                                                                                                                                                                                                                                                                                                                                                                                                                                                                                                                                                                                                                                                                                                                                                                                                                                                                                                                                                                                                                                         |
|       |                     | miR-488-3p, miR-873a-5p, miR-374b-3p, miR-664a-5p, miR-32-3p, miR-32-3p, miR-136-3p, miR-744-3p                                                                                                                                                                                                                                                                                                                                                                                                                                                                                                                                                                                                                                                                                                                                                                                                                                                                                                                                                                                                                                                                                         |
| NPTN  | ENSOARGO(C neuropla |                                                                                                                                                                                                                                                                                                                                                                                                                                                                                                                                                                                                                                                                                                                                                                                                                                                                                                                                                                                                                                                                                                                                                                                         |

miR-454-3p, miR-17-3p, miR-655-3p, miR-29b-2-5p, miR-6525, miR-1271, miR-2330-3p, miR-3074-5p, miR-582-5p, miR-18a-5p, miR-345-5p, miR-655, novel\_25, miR-204-3p, miR-301a-3p, miR-582-5p, miR-192-5p, miR-656-3p, miR-140-5p, miR-504-5p, miR-221-5p, miR-496-3p, miR-1277-5p, miR-221-5p, miR-320d, miR-500a-5p, miR-345-3p, miR-26a-5p, novel\_17, miR-2424, miR-29b-1-5p, miR-664b-3p, miR-369-3p, miR-183-5p, miR-133a-3p, miR-4429, miR-1197-5p, miR-188-3p, miR-5703, miR-215-5p, miR-199a-3p, miR-200b, miR-340-5p, miR-3968, miR-301a-5p, miR-181d-5p, miR-2284j, miR-9-5p, miR-2447, novel\_60, miR-3956-3p, miR-335-3p, miR-9-3p, miR-544-5p, novel\_94, miR-96-5p, miR-136-5p, miR-668-5p, miR-504, miR-140-5p, miR-199b-5p, miR-409-5p, miR-378g, miR-211-5p, miR-199b-5p, miR-130b-3p, miR-323b-3p, miR-29b-1-5p, miR-320b, miR-199a-3p, miR-1b-5p, miR-2310, miR-574-3p, miR-382-3p, miR-2284aa, miR-101a-5p, miR-323b, miR-125b-2-3p, miR-6529a, miR-301b-5p, miR-216a-3p, miR-9788-3p, miR-455-3p, novel\_78, miR-134-5p, miR-204-5p, miR-6740-5p, miR-144, miR-1-5p, novel\_63, miR-2284k, miR-323-3p, miR-103b, miR-2284v, miR-3074-1-3p, miR-1814c, miR-345-5p, miR-320a, miR-18a, miR-3154, miR-199a-5p, miR-154b-5p, miR-331-5p, miR-2355-5p, miR-215-5p, miR-503-3p, miR-17-3p, miR-200c-3p, miR-1a-2-5p, miR-127-5p, miR-200c, miR-199a-5p, miR-2285b, miR-2478, miR-29b-2-5p, miR-200b-3p, miR-496, miR-2427, miR-345-3p, miR-134, miR-582-3p, miR-134-5p, miR-2284z, miR-9-5p, miR-483-3p, miR-758-5p, miR-1271-5p, miR-7641, miR-18b-5p, miR-429-3p, miR-6517, miR-147-5p, miR-374c-5p, miR-301b-3p, miR-199b-5p, miR-211, miR-323c, miR-3959-3p, miR-17-3p, miR-2285x, miR-1a-1-5p, miR-376a-2-5p, miR-18b, miR-320c, miR-144-3p, miR-26b-5p, miR-216b-3p, miR-3074-5p, miR-452-5p, miR-466f-3p, miR-483-3p, miR-2411-3p, miR-7-5p, miR-345-5p, miR-2285y, miR-132-



miR-93-5p, miR-18a, miR-17-5p, miR-21a-3p, miR-424-3p, miR-20b-5p, miR-1895, miR-18a-5p, miR-345-5p, miR-345-5p, miR-339b, novel\_107, miR-216b-3p, miR-3065-3p, miR-2355-5p, miR-615-5p, miR-660-5p, miR-204-3p, miR-22-3p, miR-499b-3p, miR-34c-5p, miR-6130, miR-323-5p, miR-324-3p, miR-665, miR-874-5p, miR-486b-3p, miR-214, miR-3074-2-3p, miR-665-5p, miR-4510, miR-181c-5p, miR-93, miR-346, miR-1343-5p, miR-330-5p, miR-615-3p, miR-2366, miR-34a-5p, miR-148a-5p, miR-1224-5p, novel\_79, miR-18b-5p, miR-2285ad, miR-106a, miR-6517, miR-199a-3p, miR-2284h-5p, miR-1247-5p, miR-222-5p, miR-483-3p, miR-148b-3p, miR-216a-5p, miR-339a, miR-210-5p, miR-664-3p, miR-34b-5p, miR-152-3p, miR-21-3p, miR-106a, miR-181b-5p, miR-20a, miR-4286, miR-105-3p, miR-486-3p, novel\_39, miR-3065-3p, miR-181b-1-3p, miR-361-3p, miR-148a-3p, miR-18b, miR-7975, miR-7689-3p, miR-320b, miR-378b, miR-677, miR-669, miR-181b-3p, miR-323a-5p, miR-499a-3p, miR-34b, miR-374c-3p, miR-34c, miR-371a-5p, miR-615, miR-20a-5p, miR-147-5p, miR-6527, novel\_101, miR-181d-5p, miR-2447, miR-342-3p, miR-449a, miR-326-3p, miR-361-3p, miR-371b-3p, miR-197-3p, miR-22-3p, miR-432, miR-296-5p, miR-181a-5p, miR-2426, miR-219a-1-3p, miR-339-5p, miR-181b-2-3p, miR-340-3p, novel\_4, miR-1343-3p, miR-148b-5p, novel\_116, miR-20b, miR-432-5p, miR-197-5p, miR-2957, miR-17-5p, miR-106b-5p, miR-106a-5p, miR-342, miR-326, miR-1343-5p, miR-660, miR-214-3p, miR-483-3p, miR-106a-5p, miR-4532, miR-345-5p

miR-421-5p, miR-656-5p, miR-4324, miR-142b, miR-34c, miR-211, miR-449a, novel\_27, miR-301b-3p, miR-2284w, miR-495-3p, miR-2285x, miR-19a-3p, miR-135b-5p, miR-505-3p, miR-148a-3p, miR-3065-5p, miR-411b-3p, miR-34b, miR-320c, miR-329-5p, miR-378b, miR-7-1-3p, miR-124-5p, miR-466f-3p, miR-377-3p, miR-190a, miR-197-5p, miR-2483-5p, miR-668-3p, miR-2284ab, miR-16-1-3p, miR-188-5p, miR-2284x, miR-181a-5p, miR-1434-3p, miR-145a-5p, novel\_23, miR-3071-5p, miR-3431, miR-31-5p, miR-187-3p, miR-665, miR-339-5p, miR-130a-3p, miR-204-5p, miR-135a-1-3p, miR-100-3p, miR-135a-5p, miR-3607-3p, miR-329a, miR-3074-1-3p, miR-671-5p, miR-1248, miR-488-3p, miR-320a, miR-34c-5p, miR-2285aa, miR-1271, miR-181b-5p, miR-152-3p, miR-30f, miR-339a, miR-1957a, miR-3529-3p, miR-495-5p, miR-30a-3p, miR-2403, miR-181a-2-3p, miR-1290, miR-23b-5p, miR-30a-5p, miR-2284z, miR-129-1-3p, novel\_121, miR-2285ad, novel\_79, miR-412, miR-3968, miR-2285t, miR-3964, miR-30b-5p, miR-2285y, novel\_111, miR-3059-5p, miR-2447, miR-885-5p, miR-190b-5p, miR-203-3p, miR-211-5p, miR-130b-3p, miR-3955-3p, miR-199a-3p, miR-320b, novel\_103, miR-362-3p, miR-182-5p, miR-3187-3p, miR-8485, miR-33a-5p, miR-362-3p, miR-101a-5p, miR-2284aa, miR-3120-5p, miR-329-3p, miR-484, miR-6529a, miR-1298-5p, miR-412-3p, miR-425-3p, miR-1298-3p, miR-539-5p, miR-9788-3p, miR-455-3p, miR-2459, miR-421, novel\_78, miR-145b, novel\_74, miR-190a-5p, miR-454-3p, miR-669a-3p, miR-30e-3p, miR-30a-3p, miR-338-5p, miR-346, miR-181c-5p, miR-129-2-3p, miR-3074-2-3p, miR-30f, miR-339b, miR-186-5p, miR-129b-3p, miR-27b-5p, miR-301a-3p, miR-377-3p, miR-204-3p, miR-545-3p, miR-182-5p, miR-552-3p, miR-320d, miR-466i-5p, miR-34b-5p, miR-421-5p, miR-216c-5p, miR-329a-5p, miR-2285w, miR-142-3p, miR-4429, miR-19b-3p, miR-16-1-3p, miR-34a-5p, miR-30c-5p, miR-376a-5p, miR-362-3p, miR-29a-3p, miR-378g, miR-144-3p, miR-677, miR-320b, miR-412-3p, miR-107, miR-504, miR-450b-3p, miR-1983, miR-6516-3p, miR-493-5p, miR-18b, miR-199b-5p, miR-361-3p, miR-378j, miR-18a-3p, miR-199b-5p, miR-423-5p, novel\_27, miR-3956-3p, miR-335-5p, novel\_60, miR-29c-3p, miR-29a, miR-335, miR-199c, miR-147-5p, miR-6123, miR-421-5p, miR-2285n, miR-2285y, miR-134-3p, miR-147a, miR-185-5p, miR-103, miR-199b-3p, miR-103a-3p, miR-340-3p, miR-29b, miR-542-3p, miR-7b-5p, miR-2113, miR-1434-3p, miR-197-3p, miR-450c-3p, miR-7857, miR-30c-1-3p, miR-432-3p, miR-654-3p, miR-8485, miR-6412, miR-493-5p, miR-2330-5p, miR-628-5p, miR-491-5p, miR-466f-3p, miR-199b-5p, miR-7-5p, miR-105-5p, miR-365a-3p, miR-151b, miR-199a-5p, miR-32-3p, miR-30c-1-3p, miR-504-5p, miR-3956, miR-552-3p, miR-3065-3p, miR-18a-5p, novel\_91, miR-671-5p, miR-1827, miR-625-5p, miR-1895, miR-450a-1-3p, miR-3613-5p, miR-18a, miR-346, miR-3184-5p, miR-1306-5p, miR-6516-3p, miR-664a, miR-450b-3p, miR-486b-3p, miR-28-5p, miR-208b-5p, miR-708-5p, miR-29b-3p, miR-144, miR-450a-1-3p, miR-151-5p, miR-6517, miR-2285ad, miR-18a-3p, miR-18b-5p, miR-33b-3p, miR-142-3p, miR-2366, novel\_133, miR-2904, miR-29d-3p, miR-199a-5p, miR-3065-3p, miR-486-3p, miR-4286, miR-466i-5p, miR-450a-2-3p, novel\_96, miR-2484, novel\_127, miR-21-3p, miR-107, miR-8117, miR-30c-2-3p

|       |                   |                                                                                                                                                                                                                                                                                                                                                                                                                                                                                                                                                                                                                                                                                                                                                                                                                                                                                                                                                                                                                                                                                                                                                                                                                                                                                                                                                                                                                                                                                                                                                                                                                                                                                                                                                                                                                                                                                                                                                                                                                                                                                                                                                                                                                                                                                                                                                                   |
|-------|-------------------|-------------------------------------------------------------------------------------------------------------------------------------------------------------------------------------------------------------------------------------------------------------------------------------------------------------------------------------------------------------------------------------------------------------------------------------------------------------------------------------------------------------------------------------------------------------------------------------------------------------------------------------------------------------------------------------------------------------------------------------------------------------------------------------------------------------------------------------------------------------------------------------------------------------------------------------------------------------------------------------------------------------------------------------------------------------------------------------------------------------------------------------------------------------------------------------------------------------------------------------------------------------------------------------------------------------------------------------------------------------------------------------------------------------------------------------------------------------------------------------------------------------------------------------------------------------------------------------------------------------------------------------------------------------------------------------------------------------------------------------------------------------------------------------------------------------------------------------------------------------------------------------------------------------------------------------------------------------------------------------------------------------------------------------------------------------------------------------------------------------------------------------------------------------------------------------------------------------------------------------------------------------------------------------------------------------------------------------------------------------------|
| TRAT1 | ENSOARGOCT cell r | <p>novel_111, miR-1260b, miR-125b-2-3p, miR-503-3p, miR-335-5p, miR-668-3p, miR-193a-5p, miR-23a-3p, miR-3607-3p, miR-335, miR-592, miR-669a-3p, miR-1260a, miR-5100, miR-146a, miR-135a-5p, miR-23b-3p, miR-383-5p, miR-411b-3p, miR-677, miR-3068-3p, miR-503-3p, miR-329b, miR-1260b, miR-135b-5p, miR-503-3p, miR-23b</p>                                                                                                                                                                                                                                                                                                                                                                                                                                                                                                                                                                                                                                                                                                                                                                                                                                                                                                                                                                                                                                                                                                                                                                                                                                                                                                                                                                                                                                                                                                                                                                                                                                                                                                                                                                                                                                                                                                                                                                                                                                     |
| PRR5L | ENSOARGO(proline  | <p>miR-129b-3p, miR-362-5p, miR-18a-3p, miR-409-5p, miR-204-3p, miR-22-3p, miR-1185-2-3p, miR-146b-3p, miR-30c-1-3p, miR-10b, miR-708-5p, miR-28-5p, novel_1, miR-502-5p, miR-362-5p, miR-500b-5p, miR-2447, miR-2426, miR-22-3p, miR-2300b-3p, miR-500-5p, miR-455-3p, novel_121, miR-1185-3p, miR-147a, miR-1298-3p, miR-7641, miR-18a-3p, novel_78, novel_127, miR-450a-2-3p, miR-466i-5p, miR-30c-2-3p, miR-30c-1-3p, let-7f-2-3p, let-7f-2-3p, miR-374b-3p, miR-28-5p, miR-34c-3p, miR-2332, miR-331-3p, miR-26c, miR-378c, miR-145-3p, miR-365a-5p, let-7e-3p, miR-193a-5p, miR-3607-3p, miR-133a-3p, miR-10b-3p, miR-329b, miR-671-5p, miR-381-3p, miR-301, miR-503-3p, miR-3154, miR-23b, miR-769, miR-3957, miR-574-5p, miR-3957-5p, miR-2355-5p, miR-1271, miR-141-3p, miR-17-3p, miR-181b-5p, miR-200c-3p, miR-200a-3p, miR-543-5p, novel_127, miR-2285af, miR-205-5p, miR-664-3p, miR-200c, miR-450b-5p, miR-148b-5p, miR-29a-5p, miR-2285b, miR-490-3p, miR-1271-3p, miR-30a-3p, miR-181a-2-3p, miR-300, miR-345-3p, miR-2427, miR-501-3p, miR-302a-5p, miR-2411-5p, miR-758-5p, miR-6516-5p, miR-378h, miR-545-5p, miR-2285ad, miR-429-3p, miR-7641, miR-412, miR-431, miR-147-5p, miR-6123, miR-199c, novel_27, miR-2284w, miR-335-5p, novel_101, miR-2285x, miR-17-3p, miR-450b-3p, miR-412-3p, miR-378f, miR-2285ab, miR-3970, miR-18a-3p, miR-3065-5p, miR-3591-3p, miR-146b-3p, miR-2404, miR-670-3p, miR-677, miR-6535, miR-181b-3p, miR-378b, miR-3074-5p, miR-329-5p, miR-378a-5p, miR-452-5p, miR-7-5p, miR-377-3p, miR-365b-5p, miR-2411-3p, novel_51, miR-130b-5p, miR-668-3p, miR-30b-3p, miR-16-1-3p, miR-26a-2-3p, miR-2284x, miR-223-3p, miR-7b-5p, miR-181a-5p, miR-185-5p, miR-194-3p, novel_116, miR-544b, miR-31-5p, miR-133b-5p, miR-26b-3p, miR-17-3p, miR-6516-3p, miR-708-5p, miR-130b-5p, miR-30e-3p, miR-30a-3p, miR-324-3p, miR-665, miR-769-5p, miR-3184-5p, miR-122-5p, miR-181c-5p, miR-378c, miR-539-5p, miR-3074-5p, miR-4510, miR-214, miR-2312, miR-133b-3p, miR-625-5p, miR-582-5p, miR-1827, miR-129b-3p, miR-433-3p, miR-544-3p, miR-582-5p, miR-377-3p, miR-139-5p, miR-6130, miR-204-3p, miR-504-5p, miR-378a-3p, miR-216b-3p, miR-21-3p, miR-552-3p, miR-466i-5p, novel_17, miR-216a-5p, miR-324-3p, miR-345-3p, miR-422a, miR-664b-3p, miR-376a-5p, miR-29b-1-5p, miR-130a-5p, miR-2411, miR-2432, miR-</p> |
| NCF4  | ENSOARGO(neutroph | <p>5p, miR-3591-3p, miR-146b-3p, miR-2404, miR-670-3p, miR-677, miR-6535, miR-181b-3p, miR-378b, miR-3074-5p, miR-329-5p, miR-378a-5p, miR-452-5p, miR-7-5p, miR-377-3p, miR-365b-5p, miR-2411-3p, novel_51, miR-130b-5p, miR-668-3p, miR-30b-3p, miR-16-1-3p, miR-26a-2-3p, miR-2284x, miR-223-3p, miR-7b-5p, miR-181a-5p, miR-185-5p, miR-194-3p, novel_116, miR-544b, miR-31-5p, miR-133b-5p, miR-26b-3p, miR-17-3p, miR-6516-3p, miR-708-5p, miR-130b-5p, miR-30e-3p, miR-30a-3p, miR-324-3p, miR-665, miR-769-5p, miR-3184-5p, miR-122-5p, miR-181c-5p, miR-378c, miR-539-5p, miR-3074-5p, miR-4510, miR-214, miR-2312, miR-133b-3p, miR-625-5p, miR-582-5p, miR-1827, miR-129b-3p, miR-433-3p, miR-544-3p, miR-582-5p, miR-377-3p, miR-139-5p, miR-6130, miR-204-3p, miR-504-5p, miR-378a-3p, miR-216b-3p, miR-21-3p, miR-552-3p, miR-466i-5p, novel_17, miR-216a-5p, miR-324-3p, miR-345-3p, miR-422a, miR-664b-3p, miR-376a-5p, miR-29b-1-5p, miR-130a-5p, miR-2411, miR-2432, miR-</p>                                                                                                                                                                                                                                                                                                                                                                                                                                                                                                                                                                                                                                                                                                                                                                                                                                                                                                                                                                                                                                                                                                                                                                                                                                                                                                                                                                   |

miR-15a-5p, miR-322-5p, miR-20b, novel\_78, miR-330-3p, miR-106a, miR-16b, miR-29b, miR-497-5p, miR-345-3p, miR-29d-3p, miR-345-5p, miR-486-3p, miR-424-5p, miR-6240, miR-106a-5p, miR-20a, miR-106a, miR-378a-5p, novel\_103, miR-125a-3p, miR-16b, miR-2411-3p, miR-106b-5p, miR-106a-5p, miR-17-5p, miR-345-3p, miR-330-3p, miR-29a-3p, miR-670-3p, miR-15b-5p, miR-6535, miR-598-3p, miR-370-5p, miR-345-5p, miR-345-5p, miR-195a-5p, miR-20b-5p, miR-17-5p, miR-93-5p, miR-598-3p, miR-93, miR-1193, miR-29c-3p, miR-16-5p, miR-29a, miR-486b-3p, miR-424-5p, miR-20a-5p, miR-370-5p, miR-15a, miR-29b-3p, miR-4324, miR-16a miR-7859, miR-6516-5p, miR-199a-3p, miR-545-5p, miR-548e-3p, miR-376a-5p, novel\_73, miR-2284u, miR-362-3p, miR-2478, miR-2284y, miR-2284a, miR-2284m, miR-21-3p, miR-200a-3p, miR-2285af, miR-216a-5p, miR-324-3p, miR-6516, miR-27a-5p, miR-377-3p, miR-365a-3p, miR-204-3p, miR-2284n, miR-140-5p, miR-1277-3p, miR-141-3p, miR-329a, miR-21a-3p, miR-362-5p, miR-500b-5p, miR-2284v, miR-2284k, miR-19b-1-5p, miR-324-3p, miR-665, miR-2284d, miR-500-5p, miR-421, miR-199b-3p, miR-2284ab, miR-362-3p, miR-2426, miR-329-3p, miR-19b-2-5p, miR-432-3p, miR-2284l, miR-2310, miR-382, miR-33a-5p, miR-2284b, miR-199a-3p, miR-377-3p, miR-505, miR-362-3p, miR-2284g, miR-499b-5p, miR-450b-3p, miR-9-3p, miR-140-5p, miR-362-5p, miR-9-3p, miR-1285-5p, miR-2447, miR-135a-2-3p, miR-2284j, novel\_101, miR-6119-3p, miR-203b-5p, miR-490-5p, miR-199c, miR-2284q, miR-218-5p, miR-371a-5p, miR-382-5p

KHNYN ENSOARGO(KH and N

PDGFRA ENSOARGO(platelet

miR-677, miR-181b-3p, miR-3120-3p, miR-135b-5p, miR-195a-5p, miR-412-3p, miR-1306, miR-376b-3p, novel\_27, miR-24-3p, miR-323c, miR-342-3p, novel\_120, miR-219b-3p, miR-656-5p, miR-6119-3p, miR-206, novel\_1, miR-16a, miR-382-5p, miR-33a-3p, miR-15a, miR-133a-5p, miR-6402, miR-142b, miR-576-3p, miR-2284d, miR-412-5p, miR-3431, miR-31-5p, miR-497-5p, miR-16b, miR-16-1-3p, miR-450c-3p, miR-374b-3p, miR-708-3p, miR-1434-3p, miR-539-3p, miR-432-3p, miR-2284l, miR-382, miR-101-5p, miR-628-5p, miR-6240, miR-660, miR-466f-3p, miR-483-3p, miR-105-5p, miR-330-3p, miR-224-5p, miR-146a, miR-223-5p, miR-329a, miR-200a-5p, miR-137-3p, miR-3154, miR-23b, miR-145-3p, miR-16-5p, miR-1306-5p, miR-3969, miR-135a-5p, miR-450a-1-3p, miR-322-5p, miR-483-3p, miR-2411-5p, miR-758-5p, miR-105-2, miR-1290, miR-29a-5p, miR-200a, miR-450b-5p, miR-29b-2-5p, miR-1, novel\_96, miR-2898, miR-30c-2-3p, miR-2285af, miR-499a-3p, miR-3596, miR-499b-5p, miR-139-5p, miR-452-3p, miR-1983, miR-136-5p, miR-668-5p, miR-381-3p, miR-885-5p, miR-490-5p, miR-3968, miR-301a-5p, miR-9788-3p, miR-421, miR-105-1, novel\_78, miR-1343-3p, miR-409b, miR-330-3p, miR-3120-5p, miR-1388-5p, miR-362-3p, miR-450b-5p, miR-2426, miR-1a-3p, miR-329-3p, miR-301b-5p, miR-8485, miR-30c-1-3p, miR-23a-3p, miR-424-5p, miR-101b-3p, miR-491-5p, miR-3955-3p, miR-362-3p, miR-182-5p, miR-16b, miR-342, miR-1306-5p, miR-15b-5p, miR-499b-3p, miR-6130, miR-139-5p, miR-182-5p, miR-296-3p, miR-532-5p, miR-30c-1-3p, miR-660-5p, miR-543-3p, let-7g-3p, miR-129b-3p, miR-21a-3p, miR-450a-1-3p, miR-6525, miR-224-5p, miR-98-3p, miR-206-3p, miR-145a-3p, miR-4510, miR-424-5p, miR-129-5p, miR-208b-5p, miR-450b-3p, miR-29b-2-5p, miR-3604, miR-487a-3p, miR-23b-3p, miR-15a-5p, miR-23c, miR-485-3p, miR-16-1-3p, miR-218-1-3p, miR-103-3p, miR-2004, miR-98-3p, miR-140-3p, miR-5703, miR-

miR-20a-3p, miR-139-5p, miR-27a-3p, miR-118b-2-3p, miR-78b7-3p, miR-361-3p, miR-504, miR-2284j, miR-194b-5p, miR-181d-5p, miR-541-3p, miR-769-5p, miR-101-3p, novel\_82, miR-2284q, miR-490-5p, miR-3968, miR-145b, miR-27a-3p, miR-421, miR-541, miR-1388-5p, miR-376b, miR-33a-5p, let-7c-3p, miR-2330-5p, miR-101b-3p, miR-505, miR-214-3p, miR-146b, miR-3955-3p, miR-296-3p, miR-3065-3p, miR-2331-3p, miR-504-5p, miR-155-5p, novel\_32, miR-139-5p, miR-323-5p, miR-582-5p, miR-450a-1-3p, miR-186-5p, miR-214, miR-129-2-3p, miR-181c-5p, miR-6134, miR-769-5p, miR-338-5p, miR-132-5p, miR-4492, miR-487a-5p, miR-874-5p, miR-17-3p, miR-155-5p, miR-450b-3p, miR-505-3p, miR-2284h-5p, miR-148b-3p, miR-383-5p, miR-1197-5p, miR-5703, miR-2904, miR-361-5p, miR-16-1-3p, miR-493-3p, miR-345-3p, miR-216c-5p, miR-2432, miR-146a-5p, miR-92a-1-5p, miR-500a-5p, miR-196a-3p, miR-21-3p, miR-C1orf194 ENSOARGO(chromosome 2284m, miR-374c-3p, miR-323a-5p, miR-146b-3p, miR-148a-3p, miR-505-3p, miR-146b-5p, miR-450b-3p, miR-17-3p, miR-219b-3p, miR-24-3p, miR-203b-5p, miR-656-5p, novel\_1, miR-26b-3p, miR-31-5p, miR-2284d, miR-194-5p, miR-145a-5p, miR-374b-3p, miR-450c-3p, miR-1843b-5p, miR-181a-5p, miR-27b-3p, miR-16-1-3p, miR-2284ab, miR-138, let-7f-2-3p, let-7f-2-3p, miR-654-3p, miR-194a, miR-146a, miR-378a-5p, miR-141-3p, miR-2285aa, miR-2284n, miR-769, miR-365a-3p, miR-374c-3p, miR-488-3p, miR-30e-5p, miR-671-5p, miR-1248, miR-190a-3p, miR-10b-3p, miR-6128, miR-331-3p, miR-410-5p, miR-2284k, miR-2433, miR-3432a, miR-138-5p, miR-423-3p, miR-214-5p, miR-129-1-3p, miR-450a-1-3p, miR-545-5p, miR-23b-5p, miR-218-2-3p, miR-1290, miR-3591-5p, miR-155-5p, miR-495-5p, miR-2285b, miR-1271-3p, miR-1957a, miR-29a-5p, miR-3065-3p, miR-543-5p, miR-152-3p, miR-200a-3p, miR-181b-5p, miR-127-5p, miR-450a-2-3p, miR-17-3p

miR-412-5p, miR-134-3p, miR-3431, novel\_116, miR-411-5p, miR-31-5p, miR-103a-3p, miR-16b, miR-16-1-3p, miR-497-5p, miR-27b-3p, miR-2284x, miR-7b-5p, miR-197-3p, miR-22-3p, miR-2285r, miR-628-5p, miR-196b-5p, miR-483-3p, miR-7-5p, miR-377-3p, miR-296-3p, miR-146a, miR-105-5p, miR-6535, miR-677, miR-181b-3p, miR-3120-3p, miR-412-3p, miR-146b-5p, miR-376b-5p, miR-148a-3p, miR-150-5p, miR-3065-5p, miR-2284w, miR-199b-5p, miR-301b-3p, miR-4324, miR-142b, miR-485-3p, novel\_87, miR-322-5p, miR-758-5p, miR-2284z, novel\_121, miR-2285ad, miR-196a-5p, miR-1290, miR-1343-5p, miR-330-5p, miR-3064-5p, miR-127-5p, novel\_127, miR-200a-3p, miR-152-3p, miR-3071-3p, miR-331-5p, miR-223-5p, miR-574-5p, miR-874-3p, miR-3068-3p, miR-2355-5p, miR-125a, miR-876-3p, miR-329a, miR-20b-5p, miR-331-5p, miR-93-5p, miR-137-3p, miR-23b, miR-16-5p, miR-331-5p, miR-125b-5p, miR-539-5p, miR-376b-3p, miR-455-3p, miR-148b-5p, miR-2459, miR-421, miR-548w, novel\_78, miR-181b-2-3p, miR-1388-5p, miR-362-3p, miR-21b, miR-1839-5p, miR-329-3p, miR-2284r, miR-8485, miR-1b-5p, miR-2310, miR-23a-3p, miR-130b-3p, miR-146b, miR-199b-5p, miR-103a-2-5p, miR-214-3p, miR-29b-1-5p, miR-106b-5p, miR-16b, miR-378g, miR-2483-3p, miR-2319b, miR-2285u, miR-96-5p, miR-376a-3p, miR-335-3p, miR-1983, miR-140-5p, miR-221, miR-378j, miR-2447, miR-499a-5p, miR-490-5p, miR-218-5p, miR-23b-3p, miR-23c, miR-1247-5p, miR-2284h-5p, miR-18a-3p, miR-106a, miR-16-1-3p, miR-218-1-3p, miR-148a-5p, miR-421-5p, miR-181b-1-3p, miR-345-3p, miR-377-3p, miR-301a-3p, miR-15b-5p, miR-548o-3p, miR-625-5p, miR-543-3p, miR-2285c, miR-433-3p, miR-6525, miR-224-5p, miR-122-5p, miR-181c-5p, miR-3184-3p, miR-214, miR-454-3p, miR-4492, miR-130b-5p, miR-2285j, miR-2285g, miR-185-5p, miR-544b, miR-103, miR-20b, miR-133b-5p, miR-130a-3p, miR-873a-5p, miR-181a-5p, miR-296-3p, miR-130b-5p, miR-382, miR-124-

KIAA1324 ENSOARGO(KIAA1324

miR-1248, miR-23a-5p, miR-767, miR-598-3p, miR-874-3p, miR-3965, miR-34c-5p, miR-331-5p, miR-300-3p, miR-409-3p, miR-135a-1-3p, novel\_63, miR-374b-3p, miR-486b-3p, miR-204-5p, miR-767-5p, novel\_9, miR-6128, miR-374a-3p, miR-2427, miR-3591-5p, miR-214-5p, miR-450a-1-3p, miR-505-5p, miR-30c-2-3p, miR-125a-3p, novel\_127, miR-127-5p, miR-4286, miR-3064-5p, miR-192-3p, miR-2284y, miR-18a-3p, miR-3970, miR-150-5p, miR-9851-3p, miR-146b-5p, miR-412-3p, miR-216b-3p, novel\_68, miR-6535, miR-669, novel\_69, miR-34b, miR-34c, miR-147-5p, novel\_1, miR-449a, miR-211, miR-145a-5p, miR-450c-3p, miR-1285, miR-1434-3p, miR-2113, miR-7862, miR-377-5p, miR-133b-5p, miR-194-3p, miR-185-5p, novel\_51, miR-330-3p, miR-146a, miR-224-5p, miR-101-5p, miR-6240, miR-432-3p, miR-27b-5p, miR-598-3p, miR-450a-1-3p, miR-1827, miR-532-5p, miR-182-5p, miR-30c-1-3p, miR-27a-5p, miR-665, miR-320e, miR-2285j, miR-4492, miR-874-5p, miR-450b-3p, miR-214, miR-338-3p, miR-224-5p, miR-1193, miR-5703, miR-188-3p, miR-34a-5p, miR-2284u, novel\_73, miR-3600, miR-548e-3p, miR-18a-3p, miR-616-3p, miR-2284h-5p, miR-92a-1-5p, novel\_17, miR-2484, miR-21-3p, miR-34b-5p, miR-760-3p, miR-345-3p, miR-2285w, miR-143-3p, miR-146a-5p, miR-486-3p, miR-377-5p, miR-29b-1-5p, miR-378j, miR-361-3p, miR-1983, miR-211-5p, miR-2285u, miR-20a-3p, miR-3064-5p, miR-2284g, miR-2483-3p, miR-7857-3p, miR-218-5p, miR-374a-3p, miR-4726-5p, novel\_111, miR-361-3p, miR-323b, miR-6529a, miR-101a-5p, miR-145b, miR-330-3p, miR-9788-3p, miR-182-5p, miR-29b-1-5p, miR-323b-3p, miR-214-3p, miR-146b, miR-3085-3p, miR-382-3p, miR-2330-5p, miR-3187-3p, miR-30c-1-3p



miR-217, miR-3071-3p, miR-30f, miR-200c, miR-125a-3p, miR-205-5p, miR-107, miR-200c-3p, miR-181b-5p, miR-450a-2-3p, miR-17-3p, miR-30a-3p, miR-29b-2-5p, miR-3064-5p, miR-200a, novel\_39, miR-24-2-5p, miR-330-5p, miR-1290, miR-134, miR-345-3p, miR-10a-5p, miR-200b-3p, miR-429-3p, miR-1291-3p, miR-582-3p, miR-134-5p, miR-483-3p, miR-758-5p, miR-505-5p, miR-322-5p, miR-409-3p, miR-100-3p, miR-2284k, miR-134-5p, miR-204-5p, miR-486b-3p, miR-191-5p, miR-410-3p, novel\_9, miR-16-5p, miR-374a-3p, miR-93, miR-320a, miR-17-5p, miR-3154, miR-93-5p, miR-488-3p, miR-1248, miR-7144-5p, miR-20b-5p, miR-345-5p, miR-2285aa, miR-2284n, miR-223-5p, miR-133c, novel\_51, miR-17-5p, miR-106a-5p, miR-2411-3p, miR-2331-5p, miR-330-3p, miR-146a, miR-466f-3p, miR-193a-3p, miR-124-5p, miR-483-3p, miR-628-5p, miR-382, miR-6240, miR-130b-5p, miR-345-5p, miR-539-3p, miR-432-3p, miR-432-3p, miR-497-5p, miR-16-1-3p, miR-30b-3p, miR-2284ab, miR-16b, miR-130a-3p, miR-103a-3p, miR-103, miR-20b, miR-544b, novel\_116, miR-134-3p, miR-2284d, miR-382-5p, miR-16a, miR-485-3p, miR-576-3p, miR-6402, miR-20a-5p, miR-15a, miR-147-5p, novel\_1, novel\_101, miR-17-3p, miR-193b-3p, miR-335-5p, miR-2428, miR-301b-3p, miR-326-3p, miR-211, miR-3970, miR-2387, miR-195a-5p, miR-6516-3p, miR-146b-5p, miR-107, miR-412-3p, miR-19a-3p, miR-410-5p, miR-10a-5p, miR-3074-5p, miR-216b-3p, miR-181b-3p, miR-677, miR-670-3p, miR-2404, miR-345-3p, miR-92a-1-5p, miR-216a-5p, miR-324-3p, miR-2484, miR-221-5p, miR-760-3p, miR-106a, miR-2284m, miR-20a, miR-146a-5p, miR-486-3p, miR-181b-1-3p, miR-29b-1-5p, miR-217-5p, miR-5703, miR-2300b-3p, miR-193b-5p, novel\_133, miR-191, miR-378d, miR-16-1-3p, miR-4429, miR-19b-3p, miR-30d-3p, miR-485-3p, miR-106a, miR-548a-3p, miR-novel\_51, miR-326, miR-1306-5p, miR-146a, miR-146b, miR-483-3p, miR-378a-5p, let-7f-2-3p, miR-744-3p, miR-33a-5p, let-7f-2-3p, miR-3187-3p, miR-758-3p, miR-412-3p, miR-145a-5p, miR-758-3p, miR-653, miR-101c, miR-7862, miR-138, miR-1388-5p, miR-181b-2-3p, miR-145b, miR-31-5p, miR-151a-3p, miR-1343-3p, miR-411-5p, miR-148b-5p, miR-1185-3p, miR-412-5p, miR-30b-5p, miR-615, miR-335, miR-6527, miR-1193, miR-452-5p, miR-4454, miR-2447, miR-335-5p, miR-1285-5p, miR-326-3p, miR-877-3p, miR-1306, miR-376b-5p, miR-335-3p, miR-146b-5p, miR-1983, miR-412-3p, miR-136-5p, miR-20a-3p, miR-329-5p, miR-677, miR-4443, miR-1185-2-3p, miR-181b-3p, miR-499a-3p, miR-30f, miR-2285af, miR-30b, novel\_17, miR-200c, miR-221-5p, miR-30d, miR-200c-3p, miR-329a-5p, miR-486-3p, miR-146a-5p, miR-376a-5p, miR-376c-3p, miR-181b-1-3p, miR-330-5p, miR-30a-5p, miR-30c-5p, novel\_133, miR-615-3p, miR-30c, miR-200b-3p, miR-378d, miR-3600, miR-412, miR-429-3p, miR-151-5p, novel\_121, miR-129-1-3p, miR-486-5p, miR-302a-5p, miR-200b, miR-483-3p, miR-151-3p, miR-320e, miR-5100, miR-370-5p, miR-592, miR-486b-3p, miR-138-5p, miR-487b-5p, miR-539-5p, miR-129-2-3p, miR-376c-5p, miR-30d-5p, miR-30e-5p, miR-3613-5p, miR-376c-5p, miR-543-3p, miR-582-5p, miR-671-5p, miR-876-3p, miR-30f, miR-329b, miR-370-5p, miR-574-5p, miR-140-5p, miR-221-5p, miR-204-3p, miR-376c-3p, miR-151b, miR-376e-3p, miR-499b-3p, miR-582-5p

DHX9

ENSOARGO(CDEAH

(As:

CCDC65

ENSOARGO(Ccoiled-c

miR-483-3p, miR-758-5p, miR-24-2-5p, novel\_121, miR-545-5p, miR-2284z, miR-222, miR-411-3p, miR-105-2, miR-1290, miR-615-3p, miR-29d-3p, miR-218-2-3p, miR-24-2-5p, miR-1271-3p, miR-3065-3p, miR-200a, novel\_39, miR-376c-5p, miR-29a-5p, miR-3529-3p, miR-4286, miR-29b-2-5p, miR-30a-3p, miR-17-3p, miR-2898, miR-28-3p, miR-543-5p, novel\_127, novel\_96, miR-92a-3p, miR-200a-3p, miR-6119-5p, miR-769, miR-300-3p, miR-3957, miR-874-3p, miR-3957-5p, miR-141-3p, miR-125a, miR-2355-5p, miR-329b, miR-345-5p, miR-2318, miR-329a, miR-671-5p, miR-20b-5p, miR-17-5p, miR-3154, miR-362-5p, miR-93-5p, miR-93, miR-500b-5p, miR-28a-3p, miR-1306-5p, miR-486b-3p, miR-494-5p, miR-29b-3p, miR-125b-5p, miR-331-3p, miR-6740-5p, miR-134-3p, miR-20b, miR-2355-3p, miR-194-3p, miR-149-5p, miR-133b-5p, miR-377-5p, miR-16-1-3p, miR-30b-3p, miR-29b, miR-7862, miR-1843b-5p, miR-374b-3p, miR-3071-5p, miR-22-3p, miR-345-5p, miR-296-3p, miR-493-5p, miR-6240, miR-130b-5p, miR-668-3p, miR-363-5p, miR-2483-5p, miR-378a-5p, miR-483-3p, miR-466f-3p, miR-125a-5p, miR-296-3p, novel\_51, miR-106a-5p, miR-17-5p, miR-32, miR-105-5p, miR-330-3p, miR-411b-3p, novel\_69, miR-29a-3p, miR-146b-3p, miR-329-5p, novel\_68, miR-410-5p, miR-18a-3p, miR-150-5p, miR-3970, miR-24-3p, miR-135a-2-3p, miR-29c-3p, miR-495-3p, miR-17-3p, miR-379-3p, miR-29a, miR-92a-3p, miR-656-5p, miR-20a-5p, miR-502-5p, miR-4324, miR-616-3p, miR-106a, miR-18a-3p, miR-212-5p, miR-30d-3p, novel\_73, miR-33b-3p, miR-493-3p, miR-378d, miR-16-1-3p, miR-2300b-3p, miR-362-3p, novel\_133, miR-5703, miR-377-5p, miR-143-3p, miR-486-3p, miR-329a-5p, miR-216c-5p, miR-20a, miR-760-3p, miR-466i-5p, miR-106a, miR-221-5p, novel\_17, miR-122-3p, miR-125b, miR-185-3p, miR-216a-5p, miR-219b-5p, miR-216b-5p, miR-6130, miR-92-3p, miR-504-5p, miR-221-5p, miR-2331-3p, miR-32-5p, miR-

miR-330-5p, miR-1224-5p, miR-129-1-3p, miR-134-5p, miR-9-5p, miR-505-5p, miR-200a-3p, novel\_96, miR-2284f, miR-200a, miR-92b-3p, miR-23b, miR-137-3p, miR-30e-5p, miR-1248, miR-876-3p, miR-1271, miR-542-5p, miR-2355-5p, miR-3068-3p, miR-25-3p, miR-6740-5p, miR-2433, miR-134-5p, miR-3432a, miR-193a-5p, miR-181a-2-3p, miR-1260b, novel\_23, miR-22-3p, miR-197-3p, miR-431-3p, miR-223-3p, miR-542-3p, miR-188-5p, miR-4508, miR-381-5p, miR-16-1-3p, miR-194-3p, miR-2411-3p, novel\_51, miR-32, miR-365b-5p, miR-377-3p, miR-378a-5p, miR-432-3p, miR-3591-3p, miR-378f, miR-329-5p, miR-3074-5p, miR-181b-3p, miR-669, miR-677, miR-144-3p, miR-1307-5p, miR-2284o, miR-6123, miR-335-5p, miR-2284w, miR-378a-3p, miR-378i, miR-30c-5p, miR-664-5p, miR-16-1-3p, miR-23c, miR-23b-3p, miR-345-3p, miR-92a-1-5p, miR-422a, miR-500a-5p, miR-324-3p, novel\_17, miR-2285p, miR-2484, miR-345-3p, miR-487a, miR-329a-5p, miR-143-3p, miR-142a-3p, miR-30d-5p, miR-296-3p, miR-216b-3p, miR-154a-3p, miR-548o-3p, miR-32-5p, miR-504-5p, miR-151b, miR-216b-5p, miR-377-3p, miR-10a, miR-15b-3p, miR-130b-5p, miR-874-5p, novel\_74, miR-665-5p, miR-3074-5p, miR-3184-3p, miR-129-2-3p, miR-433-5p, miR-769-5p, miR-1388-5p, miR-181b-2-3p, novel\_78, miR-1343-3p, miR-2459, miR-421, miR-126a-5p, miR-455-3p, miR-1298-3p, miR-381-5p, miR-103a-2-5p, miR-491-5p, miR-23a-3p, miR-127-3p, miR-101b-3p, miR-1388-3p, miR-378d, miR-504, miR-211-5p, miR-374b-5p, miR-7689-3p, miR-139-5p, miR-4792, miR-24-1-5p, miR-3596, miR-154-3p, miR-3968, miR-9-5p, miR-363-3p, miR-3956-3p, miR-2447, miR-1285-5p, miR-877-3p, miR-361-3p, miR-30a-5p, miR-134, miR-345-3p, miR-10a-5p, miR-7641, miR-2411-5p, miR-378h, miR-302a-5p, miR-2397-5p, miR-1260a, miR-543-5p, miR-92a-3p, miR-450a-2-3p, miR-29b-2-5p, miR-380-5p, miR-24-2-5p, miR-2478, miR-3154, miR-362-5p, miR-2448-3p, miR-671-3p, miR-2285aa, miR-2355-5p, miR-3068-3p, miR-545-3p, miR-500-3p, miR-670-3p, miR-299, miR-299b-5p, miR-767, miR-2285x, miR-541-3p, miR-342-3p, miR-502-3p, miR-326-3p, novel\_44, miR-33a-3p, miR-324-3p, miR-1247-3p, miR-767-5p, miR-2300a-5p, miR-429-3p, miR-423-3p, miR-545-5p, miR-582-3p, miR-200b, miR-330-5p, miR-501-3p, miR-217-5p, miR-30b-3p, miR-501-3p, miR-541, miR-200b-3p, miR-16-1-3p, miR-299a-5p, miR-16-1-3p, miR-30b-3p, miR-369-3p, miR-1388-3p, miR-29b-1-5p, miR-217, miR-29b-1-5p, miR-326, miR-200c, miR-342, miR-1277-5p, miR-200c-3p

miR-30b-3p, miR-29b, miR-219a-1-3p, miR-181a-5p, miR-432-5p, miR-130a-3p, miR-665, miR-452-5p, miR-124-5p, miR-330-3p, miR-136-3p, miR-345-5p, miR-6516-3p, miR-379-5p, miR-19a-3p, miR-2285ab, miR-2387, miR-29a-3p, miR-10a-5p, miR-22-5p, miR-203b-5p, miR-147-5p, novel\_1, miR-33a-3p, miR-326-3p, miR-2428, miR-3959-3p, miR-3957-3p, miR-17-3p, novel\_101, miR-342-3p, novel\_120, miR-10a-5p, miR-582-3p, miR-29d-3p, miR-345-3p, miR-134, miR-545-5p, miR-24-2-5p, miR-302a-5p, miR-378h, miR-543-5p, miR-17-3p, miR-450a-2-3p, miR-181b-5p, miR-490-3p, miR-671-5p, miR-320a, miR-3154, miR-374c-3p, miR-365a-3p, miR-28-5p, miR-486b-3p, miR-331-3p, miR-3969, miR-409-3p, miR-29b-3p, miR-378c, miR-323-3p, miR-6128, miR-1306-5p, miR-3120-5p, miR-378c, miR-101a-5p, miR-2426, miR-412-3p, miR-30b-3p, miR-378b, miR-6529a, miR-10b, miR-143-5p, miR-4791, miR-216a-3p, miR-9788-3p, miR-362-3p, miR-342, miR-320b, miR-326, novel\_115, miR-1306-5p, miR-382-3p, miR-494-3p, novel\_94, miR-129b-5p, miR-361-3p, miR-378e, miR-489, miR-499b-5p, miR-335, miR-1973, miR-371a-5p, miR-2285n, miR-154a, miR-2285f, miR-181d-5p, miR-452-5p, miR-3059-5p, novel\_60, miR-378d, miR-19b-3p, miR-4429, miR-2904, miR-5703, miR-1197-5p, miR-140-3p, miR-2408, miR-362-3p, miR-2300b-3p, miR-199a-3p, miR-532-3p, miR-383-5p, miR-3600, miR-548e-3p, miR-221-5p, miR-21-3p, miR-2284m, miR-320d, miR-466i-5p, miR-105-3p, miR-21a-3p, novel\_25, novel\_32, miR-22-3p, miR-877-5p, miR-193b-3p, miR-6130, miR-378a-3p, miR-221-5p, miR-708-5p, miR-450b-3p, miR-6516-3p, miR-664a, miR-17-3p, miR-320e, miR-10b-5p, miR-425-5p, miR-378c, miR-539-5p, miR-145a-3p, miR-4510, miR-188-5p, miR-2284x, miR-3432b, miR-22-3p, miR-450c-3p, miR-432, miR-223-3p, miR-3535, miR-412-5p, miR-340-3p, miR-192a-3p, miR-2411-3p, novel\_51, miR-377-3p, miR-432-3p, miR-424-5p, miR-2330-5p, miR-130b-5p, miR-503-3p, miR-16b, miR-2331-5p, miR-182-5p, miR-323b-3p, miR-3085-3p, miR-214-3p, miR-1343-5p, miR-103a-3p, novel\_78, miR-185-5p, miR-134-3p, miR-496-5p, miR-103, miR-9788-3p, miR-1285, miR-484, miR-653, miR-323b, miR-22-3p, miR-29b, miR-16b, miR-380-3p, miR-497-5p, miR-21b, miR-3059-5p, miR-4454, miR-29c-3p, miR-24-3p, miR-2284w, miR-6402, miR-15a, miR-218-5p, miR-16a, miR-29a, miR-490-5p, miR-3964, miR-20a-3p, miR-3064-5p, miR-320b, miR-29a-3p, miR-378g, miR-25, miR-2387, miR-361-3p, miR-18a-3p, miR-107, miR-412-3p, miR-136-5p, miR-195a-5p, miR-1983, miR-3064-5p, miR-495-5p, miR-380-3p, miR-2432, miR-196a-3p, miR-466i-5p, miR-450a-2-3p, novel\_127, miR-21-3p, miR-107, miR-18a-3p, miR-3600, miR-15a-5p, miR-758-5p, miR-322-5p, miR-1246, miR-2408, miR-29d-3p, miR-1343-5p, miR-665-5p, miR-214, miR-16-5p, miR-193a-5p, miR-6525, miR-338-3p, miR-29b-3p, miR-767-5p, miR-130b-5p, miR-424-5p, miR-874-5p, miR-2331-3p, miR-574-5p, miR-182-5p, miR-27a-5p, miR-15b-5p, miR-324-5p, miR-22-3p, miR-200a-5p, miR-767

TEX33 ENSOARGO( testis e.

IQCA1 ENSOARGO( IQ motif

miR-330-3p, novel\_19, novel\_124, miR-103a-2-5p, miR-193a-3p, miR-2285o, miR-6240, let-7c-3p, miR-432-3p, miR-2284l, miR-432-3p, miR-491-3p, miR-19b-2-5p, miR-432, miR-4791, novel\_23, miR-1260b, miR-330-3p, miR-339-5p, miR-181b-2-3p, miR-425-3p, miR-432-5p, miR-3535, miR-3431, miR-142b, miR-769-5p, miR-107-5p, novel\_87, miR-206, novel\_120, miR-3059-5p, miR-212-3p, miR-193b-3p, miR-2285f, miR-154a, miR-2285ab, miR-361-3p, miR-376b-5p, miR-1291, miR-6395, novel\_68, miR-4792, miR-363, miR-329-5p, miR-320b, miR-655-5p, miR-7977, miR-7857-3p, miR-323a-5p, miR-677, miR-181b-3p, miR-1260a, miR-2285af, miR-210-5p, miR-324-3p, miR-339a, miR-2898, miR-99a-3p, miR-760-3p, miR-1a-2-5p, miR-329a-5p, miR-2403, miR-181b-1-3p, miR-130a-5p, novel\_39, miR-2285b, miR-490-3p, miR-3591-5p, novel\_79, miR-210-3p, miR-328-3p, miR-2285j, miR-99b-3p, miR-19b-1-5p, miR-4510, miR-133a-3p, miR-769-5p, miR-1260b, miR-206-3p, miR-424-3p, miR-376c-5p, miR-3154, miR-2312, miR-133b-3p, let-7g-3p, miR-339b, miR-376c-5p, miR-23a-5p, miR-671-5p, miR-1827, miR-1248, miR-542-5p, miR-99a-3p, miR-132-5p, miR-323-5p, miR-769, miR-6130, miR-193b-3p, miR-324-5p

miR-24-3p, miR-219b-3p, miR-2285w, miR-6128, miR-17-3p, miR-17-3p, miR-17-3p, miR-133a-5p, miR-324-3p, miR-331-3p, miR-378g, miR-134-3p, miR-2284h-5p, miR-18b-5p, miR-885-3p, miR-18a-5p, miR-941, miR-885-3p, miR-18b, miR-18a

miR-146a, miR-491-5p, miR-3085-3p, let-7e, miR-214-3p, miR-146b, miR-1839-3p, miR-494-3p, let-7a-5p, miR-30c-1-3p, miR-654-3p, miR-1b-5p, miR-3187-3p, miR-1298-5p, miR-1843b-5p, miR-432, miR-484, miR-6529a, miR-2426, miR-544a, miR-138, miR-2284x, miR-27b-3p, novel\_78, miR-103a-3p, miR-27a-3p, miR-665, let-7g-5p, miR-1298-3p, miR-432-5p, miR-103, miR-544b, miR-194-3p, miR-216a-3p, miR-6402, miR-133a-5p, miR-502-5p, let-7i, miR-147-5p, miR-2285t, miR-3956-3p, miR-1a-1-5p, miR-3059-5p, novel\_60, miR-17-3p, miR-1839-3p, miR-361-3p, miR-18a-3p, miR-216a-3p, miR-107, miR-136-5p, let-7e-5p, miR-146b-5p, miR-216b-3p, miR-4792, miR-3064-5p, miR-7977, miR-7689-3p, miR-2483-3p, miR-3082-5p, miR-4443, miR-27a-3p, let-7d-5p, miR-125a-3p, novel\_17, miR-205-5p, let-7c-5p, miR-185-3p, miR-30c-2-3p, let-7f-5p, miR-1a-2-5p, miR-98-5p, miR-17-3p, let-7k, novel\_96, novel\_127, miR-107, miR-221-5p, miR-4286, miR-3064-5p, miR-421-5p, miR-148b-5p, miR-490-3p, miR-3956-5p, let-7g, miR-486-3p, miR-146a-5p, miR-193b-5p, miR-215-5p, miR-196l, miR-140-3p, miR-1197-5p, miR-142-3p, let-7d, miR-128-3p, miR-18a-3p, miR-3600, miR-487a-3p, miR-532-3p, miR-1-5p, let-7f, miR-664a, miR-17-3p, miR-138-5p, miR-486b-3p, miR-28-5p, miR-208b-5p, miR-708-5p, let-7b, miR-214, miR-338-3p, let-7b-5p, miR-129b-3p, miR-10b-3p, miR-186-5p, miR-485-5p, miR-30c-1-3p, miR-221-5p, miR-215-5p, miR-544-3p, miR-192-5p, let-7i-5p

GBX2 ENSOARGO(gastrula)

TSP0 ENSOARGO(transloc)

TINF2 ENSOARGO(TERF1 (T

miR-30c-2-3p, miR-200c, miR-2285af, miR-543-5p, miR-200c-3p, miR-29b-2-5p, miR-3529-3p, miR-199a-5p, miR-134, miR-345-3p, miR-200b-3p, miR-582-3p, miR-7641, miR-545-5p, miR-378h, miR-2411-5p, miR-2332, miR-5100, miR-551b-3p, miR-374b-3p, miR-28-5p, miR-486b-3p, miR-410-3p, miR-6128, miR-378c, miR-374a-3p, miR-93, miR-323-3p, miR-17-5p, miR-320a, miR-503-3p, miR-381-3p, miR-1814c, let-7g-3p, miR-487a-3p, miR-199a-5p, miR-34c-5p, miR-17-5p, miR-106a-5p, miR-197-5p, miR-466f-3p, miR-125a-5p, miR-452-5p, miR-382, miR-6412, miR-3071-5p, miR-374b-3p, miR-1434-3p, miR-219a-1-3p, miR-30b-3p, miR-380-3p, miR-2284ab, miR-544b, miR-20b, miR-2355-3p, miR-382-5p, miR-34c, miR-16a, miR-20a-5p, miR-6402, miR-15a, miR-199c, miR-203b-5p, miR-22-5p, novel\_1, novel\_101, novel\_120, novel\_27, miR-449a, miR-2387, miR-195a-5p, miR-6516-3p, miR-655-5p, miR-34b, miR-125b, miR-216a-5p, miR-21-3p, miR-34b-5p, miR-30b-3p, miR-221-5p, miR-466i-5p, miR-2284m, miR-106a, miR-320d, miR-20a, miR-216c-5p, miR-2411, miR-130a-5p, miR-29b-1-5p, miR-5703, miR-140-3p, miR-4429, miR-3600, miR-616-3p, miR-200b, miR-15a-5p, miR-383-5p, miR-29b-2-5p, miR-19b-1-5p, miR-708-5p, miR-424-5p, miR-155-5p, miR-6516-3p, miR-664a, miR-3074-2-3p, miR-539-5p, miR-378c, miR-6134, miR-21a-3p, miR-154b-3p, miR-378a-3p, miR-140-5p, miR-221-5p, miR-155-5p, miR-877-5p, miR-139-5p, miR-544-3p, novel\_115, miR-320b, miR-3955-3p, miR-494-3p, miR-2330-5p, miR-424-5p, miR-106a-5p, miR-3187-3p, miR-30c-1-3p, miR-125b-2-3p, miR-30b-3p, miR-378b, miR-6529a, miR-3120-5p, miR-16-2-3p, miR-544a, miR-450b-5p, miR-101a-5p, miR-378c, miR-151a-3p, miR-142-3p, miR-107-5p, miR-2284q, miR-374a-3p, miR-452-5p, miR-3059-5p, miR-219a-2-3p, miR-9-3p, miR-199b-5p, miR-452-3p, miR-664b, miR-3082-5p, miR-378a, miR-7857-3p, miR-3071-3p, miR-219a-3p, miR-664a-3p, miR-

miR-450b-3p, miR-1291, miR-2387, miR-2285ab, miR-371b-3p, miR-326-3p, miR-135a-2-3p, miR-17-3p, miR-2285x, miR-495-3p, miR-1193, miR-128-1-5p, miR-199c, miR-147-5p, miR-502-5p, miR-33a-3p, let-7i, let-7g-5p, miR-185-5p, miR-432-5p, miR-377-5p, miR-219a-1-3p, miR-138, miR-1285, miR-181a-5p, miR-654-3p, miR-345-5p, miR-130b-5p, miR-363-5p, miR-1343-5p, miR-330-3p, miR-190a, miR-487a-3p, miR-615-5p, miR-141-3p, miR-370-3p, miR-10b-3p, miR-671-5p, miR-485-5p, miR-376c-5p, miR-381-3p, miR-488-3p, miR-362-5p, miR-3154, miR-500b-5p, miR-365a-5p, miR-1306-5p, miR-3607-3p, miR-138-5p, miR-370-5p, miR-410-5p, miR-1-5p, miR-331-3p, miR-6516-5p, miR-545-5p, miR-582-3p, let-7d, miR-300, miR-128-3p, miR-134, miR-501-3p, miR-30a-5p, miR-7134-5p, miR-28b, miR-376b-5p, miR-1957a, miR-376c-5p, miR-3529-3p, miR-181a-2-3p, miR-4286, miR-30a-3p, miR-29b-2-5p, miR-181b-5p, miR-450a-2-3p, miR-2898, miR-17-3p, miR-543-5p, miR-6119-5p, let-7c-5p, miR-30c-2-3p, miR-27a-3p, let-7d-5p, miR-10b, miR-20a-3p, miR-452-3p, miR-3064-5p, miR-7977, miR-499b-5p, miR-361-3p, miR-362-5p, miR-502-3p, miR-541-3p, miR-181d-5p, miR-1296-5p, miR-2285f, miR-2284q, miR-2285t, miR-30b-5p, miR-500-5p, miR-9788-3p, miR-27a-3p, miR-3120-5p, miR-143-5p, miR-4791, miR-7857, miR-30c-1-3p, miR-4532, miR-382-3p, miR-2330-5p, let-7a-5p, miR-3085-3p, miR-1468, let-7e, novel\_103, miR-5126, miR-326, miR-2957, miR-362-3p, miR-139-5p, miR-6130, miR-193b-3p, miR-27a-5p, miR-6516, miR-877-5p, miR-204-3p, novel\_25, miR-22-3p, miR-370-5p, miR-30f, miR-154b-3p, miR-2312, let-7b-5p, miR-4510, miR-145a-3p, miR-539-5p, miR-17-3p, miR-664a, miR-450b-3p, miR-29b-2-5p, miR-320e, miR-324-3p, miR-148b-3p, miR-616-3p, miR-3600, miR-378d, miR-362-3p, miR-140-3p, miR-1193, miR-5703, miR-2904, miR-124-3p, miR-2887, miR-466i-5p, miR-760-3p, miR-2900-3p, miR-21-3p, miR-30b-3p, miR-106a-3p, miR-2900b-

miR-299a-3p, miR-429-3p, miR-1224-5p, novel\_79, miR-322-5p, miR-2284z, novel\_121, miR-1343-5p, miR-29d-3p, miR-218-2-3p, miR-330-5p, let-7a-2-3p, miR-3529-3p, miR-24-2-5p, miR-380-5p, miR-200a, miR-199a-5p, miR-490-3p, miR-376b-3p, miR-205-5p, miR-200c, miR-339a, miR-17-3p, miR-28-3p, miR-2898, miR-200c-3p, miR-181b-5p, miR-200a-3p, miR-141-3p, miR-3956, miR-300-3p, miR-199a-5p, miR-2284n, miR-2448-3p, miR-93-5p, miR-376c-5p, miR-17-5p, miR-876-3p, let-7g-3p, miR-7144-5p, miR-20b-5p, novel\_48, miR-376c-5p, miR-23a-5p, miR-1248, miR-28a-3p, miR-16-5p, miR-93, miR-29b-3p, miR-494-5p, miR-486b-3p, miR-592, miR-204-5p, miR-130a-3p, miR-339-5p, miR-3535, miR-544b, miR-20b, miR-708-3p, miR-873a-5p, miR-181a-5p, miR-22-3p, miR-16b, miR-29b, miR-380-3p, miR-497-5p, miR-188-5p, miR-380-5p, miR-130b-5p, miR-2483-5p, let-7f-2-3p, let-7f-2-3p, miR-432-3p, miR-432-3p, let-7j, miR-503-3p, let-7a-2-3p, miR-224-5p, miR-377-3p, miR-190a, miR-106a-5p, miR-17-5p, miR-378a-5p, miR-1343-5p, miR-106b-3p, miR-193a-3p, novel\_68, miR-3074-5p, miR-3120-3p, miR-299b-3p, miR-29a-3p, miR-376b-5p, miR-1306, miR-3065-5p, miR-450b-3p, miR-7975, miR-195a-5p, miR-342-3p, miR-193b-3p, miR-29c-3p, miR-17-3p, miR-211, miR-24-3p, miR-326-3p, miR-301b-3p, miR-199b-5p, miR-15a, miR-20a-5p, miR-16a, miR-6119-3p, miR-29a, novel\_1, miR-106a, miR-383-5p, miR-15a-5p, novel\_83, miR-532-3p, novel\_133, miR-193b-5p, miR-493-3p, miR-20a, miR-125b-2-3p, miR-2432, miR-486-3p, miR-2285p, miR-500a-5p, miR-106a, miR-466i-5p, miR-221-5p, miR-299-3p, miR-221-5p, miR-140-5p, miR-182-5p, miR-544-3p, miR-377-3p, miR-301a-3p, miR-193b-3p, miR-6130, miR-22-3p, miR-15b-5p, miR-129b-3p, miR-433-3p, miR-487b-5p, let-7g-3p, miR-339b, miR-539-5p, miR-3074-5p, miR-4510, miR-145a-3p, miR-1271, miR-665-5p, miR-224-5p, miR-3184-5p, miR-181c-5p, miR-6134, miR-15b-3p, miR-151-5p, miR-1343-3p, miR-330-3p, miR-148b-5p, let-7g-5p, miR-194-5p, miR-1839-5p, miR-21-5p, miR-363-5p, miR-6240, let-7a-5p, miR-2310, novel\_51, miR-194a, miR-2411-3p, miR-505, miR-330-3p, miR-377-3p, let-7e, miR-211-5p, miR-7689-3p, let-7d-5p, miR-6535, miR-2483-3p, miR-378b, miR-21c, miR-129b-5p, let-7e-5p, miR-135b-5p, miR-194b-5p, miR-212-3p, novel\_27, miR-211, novel\_87, let-7i, miR-6119-3p, miR-1961, miR-345-3p, miR-148a-5p, let-7d, miR-142-3p, miR-493-3p, let-7g, miR-376c-3p, miR-148b-5p, miR-345-3p, let-7c-5p, miR-324-3p, miR-216a-5p, miR-196a-3p, let-7k, miR-1277-5p, miR-6536, miR-98-5p, let-7f-5p, let-7i-5p, miR-376e-3p, miR-377-3p, miR-1814c, miR-625-5p, let-7b, let-7b-5p, miR-135a-5p, miR-3604, let-7f, miR-204-5p, miR-208b-5p, miR-410-3p, miR-486-3p, miR-378g, miR-134-3p, miR-615-5p, miR-2300a-5p, miR-4492, miR-486b-3p, miR-128-1-5p

LAMC1 ENSOARGO(laminin,

LANCL1 ENSOARGO(LanC lan

MPPED1 ENSOARGO(metallopro



miR-543-5p, novel\_127, miR-2898, miR-200c-3p, miR-200c, miR-125a-3p, miR-3065-3p, miR-199a-5p, miR-490-3p, miR-29b-2-5p, miR-4286, miR-105-2, miR-200b-3p, miR-10a-5p, miR-411-3p, miR-2427, miR-218-2-3p, miR-23b-5p, miR-330-5p, miR-615-3p, miR-3591-5p, miR-582-3p, miR-2285ad, miR-429-3p, miR-423-3p, miR-191-5p, miR-204-5p, miR-125b-5p, miR-410-5p, miR-494-5p, miR-135a-1-3p, miR-370-5p, miR-876-3p, miR-10b-3p, miR-345-5p, miR-329a, miR-200a-5p, miR-3154, miR-199a-5p, miR-769, miR-2285aa, miR-125a, miR-215-5p, miR-574-5p, miR-874-3p, miR-660, miR-452-5p, miR-125a-5p, miR-378a-5p, miR-105-5p, novel\_51, miR-296-3p, miR-296-3p, miR-345-5p, miR-432-3p, miR-363-5p, miR-2889, miR-744-5p, miR-125b-1-3p, novel\_23, miR-708-3p, miR-542-3p, miR-2285g, miR-134-3p, miR-26b-3p, miR-31-5p, miR-340-3p, miR-133b-5p, miR-6123, miR-379-3p, miR-425-5p, miR-3613, miR-326-3p, miR-199b-5p, miR-211, miR-1193, miR-6395, miR-1291, miR-150-5p, miR-3970, miR-18a-3p, miR-2285ab, novel\_69, miR-655-5p, miR-10a-5p, miR-3074-5p, miR-221-5p, miR-125b, miR-92a-1-5p, novel\_17, miR-376a-5p, miR-216c-5p, miR-2904, miR-1197-5p, miR-5703, novel\_133, miR-191, miR-215-5p, miR-362-3p, miR-1247-5p, miR-328-3p, miR-23b-3p, miR-7859, miR-23c, miR-200b, miR-18a-3p, miR-324-3p, miR-29b-2-5p, miR-320e, miR-664a-5p, miR-122-5p, miR-10b-5p, miR-769-5p, miR-433-5p, miR-539-5p, miR-145a-3p, miR-3074-5p, miR-345-5p, miR-2285c, miR-3613-5p, miR-204-3p, miR-10a, miR-192-5p, miR-2284s, miR-216b-5p, miR-3065-3p, miR-370-5p, miR-296-3p, miR-532-5p, miR-552-3p, miR-221-5p, miR-2331-3p, miR-660-5p, miR-199b-5p, novel\_19, miR-362-3p, miR-326, novel\_103, miR-8485, miR-4532, miR-23a-3p, miR-382-3p, miR-2330-5p, miR-3120-5p, miR-362-3p, miR-1388-5p, miR-2426, miR-450b-5p, miR-296-5p, miR-2284r, miR-329-3p, miR-10b, miR-2459, miR-421, miR-2285a, miR-

PSME2      ENSOARGO(proteasome)

miR-4286, miR-29b-2-5p, miR-490-3p, miR-2285b, miR-1271-3p, novel\_39, miR-28b, miR-125a-3p, miR-1260a, novel\_127, miR-196a-2-3p, miR-6517, miR-129-1-3p, miR-134-5p, miR-582-3p, miR-483-3p, miR-505-5p, miR-1343-5p, miR-134, miR-615-3p, miR-885-3p, miR-1306-5p, miR-365a-5p, miR-1260b, miR-93, miR-370-5p, miR-34c-3p, miR-2433, miR-134-5p, miR-28-5p, miR-486b-3p, miR-204-5p, miR-138-5p, miR-2355-5p, miR-2285aa, miR-874-3p, miR-154b-5p, miR-769, miR-17-5p, miR-93-5p, miR-20b-5p, miR-7144-5p, miR-345-5p, miR-345-5p, novel\_51, miR-17-5p, miR-106a-5p, miR-365b-5p, miR-7-5p, miR-193a-3p, miR-1343-5p, miR-483-3p, miR-130a-3p, miR-31-5p, miR-20b, miR-3431, miR-134-3p, miR-2285g, miR-374b-3p, miR-197-3p, miR-7b-5p, miR-744-5p, miR-1260b, miR-138, miR-30b-3p, miR-1193, miR-2285x, miR-193b-3p, miR-335-5p, miR-301b-3p, novel\_27, miR-371b-3p, miR-211, miR-485-3p, miR-142b, miR-28c, miR-20a-5p, miR-502-5p, miR-4324, miR-6123, miR-147-5p, miR-3120-3p, miR-6535, miR-374c-3p, miR-18a-3p, miR-1306, miR-150-5p, miR-2387, miR-6395, miR-1291, miR-20a, miR-183-5p, miR-486-3p, miR-125b-2-3p, miR-185-3p, miR-324-3p, novel\_17, miR-210-5p, miR-21-3p, miR-221-5p, miR-760-3p, miR-1b-3p, miR-106a, miR-18a-3p, miR-328-3p, miR-532-3p, miR-616-3p, miR-1197-5p, miR-5703, miR-188-3p, novel\_133, miR-664-5p, miR-33b-3p, miR-214, miR-4510, miR-129-2-3p, miR-3184-3p, miR-145a-3p, miR-346, miR-769-5p, miR-320e, miR-664a-5p, miR-665, miR-324-3p, miR-874-5p, miR-454-3p, miR-708-5p, miR-4492, miR-664a, novel\_74, miR-552-3p, miR-532-5p, miR-216b-3p, miR-370-5p, miR-504-5p, miR-221-5p, miR-2331-3p, miR-204-3p, miR-6130, miR-193b-3p, miR-301a-3p, miR-129b-3p, miR-2285c, miR-21a-3p, miR-1827, novel\_99, miR-885-3p, miR-345-5p, miR-652-5p, miR-382-3p, miR-106a-5p, miR-574-3p, miR-8485, miR-3187-3p, miR-4532, miR-106b-3p, miR-1343-3p, miR-539-5p, miR-383-5p, miR-204-3p, miR-6529a, miR-873a-5p, miR-708-3p, miR-381-3p, miR-200a-5p, miR-300, miR-145a-3p, miR-28a-3p, miR-590-3p, miR-2447, miR-125b-2-3p, miR-1957a, miR-29a-5p, miR-8485, miR-218-5p, miR-2285j, miR-107-5p, miR-6536, novel\_9, miR-28-3p, miR-103a-2-5p, miR-2284q

EMC9

ENSOARGO(ER membr:

UGT1A1

ENSOARGO(UDP gluc:

miR-125a-5p, miR-2285l, miR-197-5p, miR-654-3p, miR-363-5p, miR-1260b, miR-219a-1-3p, miR-29b, miR-194-5p, miR-1285, miR-873a-5p, miR-103, miR-2285g, miR-502b, miR-203b-5p, miR-92a-3p, miR-34c, miR-133a-5p, miR-3613, miR-2428, miR-326-3p, miR-449a, miR-24-3p, miR-3959-3p, miR-371b-3p, miR-6395, miR-9851-3p, miR-7975, miR-107, miR-1291, miR-18a-3p, miR-2285ab, miR-34b, miR-29a-3p, miR-7-1-3p, miR-378b, miR-543-5p, miR-92a-3p, miR-107, miR-2898, miR-30c-2-3p, miR-6119-5p, miR-1260a, miR-181a-2-3p, miR-4286, miR-29b-2-5p, miR-582-3p, miR-29d-3p, miR-134, miR-545-5p, miR-378h, miR-204-5p, miR-486b-3p, miR-31-3p, miR-331-3p, miR-26c, miR-29b-3p, miR-378c, miR-500b-5p, miR-3607-3p, miR-1306-5p, miR-671-5p, miR-7144-5p, miR-362-5p, miR-3154, miR-3965, miR-34c-5p, miR-141-3p, miR-370-3p, miR-3085-3p, miR-362-3p, miR-1306-5p, miR-326, miR-30c-1-3p, miR-376b, miR-3120-5p, miR-378c, miR-412-3p, miR-143-5p, miR-484, miR-378b, miR-296-5p, miR-2285e, miR-500-5p, miR-216a-3p, miR-27a-3p, miR-151a-3p, miR-4726-5p, miR-2285n, miR-362-5p, miR-194b-5p, miR-2285f, novel\_94, miR-369-5p, miR-361-3p, miR-27a-3p, miR-7857-3p, miR-378e, miR-7977, miR-3064-5p, miR-34b-5p, miR-221-5p, miR-760-3p, miR-466i-5p, miR-125b, miR-185-3p, miR-183-5p, miR-378d, miR-1197-5p, miR-188-3p, miR-140-3p, miR-124-3p, miR-2904, miR-362-3p, novel\_133, miR-532-3p, miR-148b-3p, miR-487a-5p, miR-6516-3p, miR-155-5p, miR-450b-3p, miR-29b-2-5p, miR-6134, miR-145a-3p, miR-4510, miR-378c, miR-30f, miR-3613-5p, miR-21a-3p, miR-155-5p, novel\_32, miR-204-3p, miR-6130, miR-221-5p, miR-378a-3p, miR-378a-5p, novel\_51, miR-194a, miR-32, miR-377-3p, miR-7-5p, miR-432-3p, miR-432-3p, miR-2285r, miR-668-3p, miR-188-5p, miR-27b-3p, miR-26a-2-3p, miR-450c-3p, miR-197-3p, miR-7b-5p, miR-149-5p, miR-412-5p, miR-102a-3p, miR-3955-5p, miR-6123, miR-

miR-362-5p, miR-877-3p, miR-361-3p, miR-219a-5p, miR-194b-5p, miR-2447, miR-335, miR-3968, miR-4726-5p, miR-4443, let-7d-5p, miR-2483-3p, miR-499a-3p, miR-25, miR-378g, miR-7977, miR-2319b, miR-3064-5p, novel\_94, miR-136-5p, miR-99b-5p, miR-361-3p, miR-140-5p, miR-3187-3p, miR-8485, miR-2330-5p, miR-106a-5p, let-7a-5p, let-7e, miR-491-5p, miR-3085-3p, miR-106b-5p, miR-362-3p, miR-431-5p, miR-1306-5p, miR-342, miR-2459, miR-500-5p, miR-1298-3p, miR-181b-2-3p, miR-2300a-5p, miR-409b, miR-1343-3p, miR-1839-5p, miR-450b-5p, miR-2426, miR-362-3p, miR-30b-3p, miR-296-5p, miR-2284r, miR-6529a, miR-329-3p, miR-484, miR-338-3p, let-7b-5p, miR-425-5p, miR-3958-5p, let-7b, miR-4492, novel\_74, miR-665, miR-320e, let-7f, let-7i-5p, novel\_32, miR-204-3p, miR-6516, miR-377-3p, miR-499b-3p, miR-552-3p, miR-370-5p, miR-3065-3p, miR-660-5p, miR-2331-3p, miR-1827, miR-345-5p, miR-411, miR-433-3p, miR-181b-1-3p, miR-345-3p, miR-20a, let-7k, miR-299-3p, miR-30b-3p, miR-760-3p, miR-98-5p, miR-185-3p, miR-125b, miR-324-3p, miR-328-3p, miR-532-3p, miR-7859, miR-212-5p, miR-3600, miR-1b-3p, miR-106a, miR-18a-3p, miR-548e-3p, miR-16-1-3p, novel\_73, miR-217-5p, miR-1197-5p, miR-188-3p, miR-1961, miR-362-3p, miR-2428, novel\_27, miR-371b-3p, miR-1193, novel\_101, miR-29c-3p, miR-335-5p, miR-342-3p, miR-6123, miR-379-3p, miR-29a, let-7i, miR-20a-5p, miR-502-5p, miR-181b-3p, miR-677, miR-299b-3p, miR-29a-3p, miR-3120-3p, miR-216b-3p, novel\_68, let-7e-5p, miR-6395, miR-1291, miR-450b-3p, miR-410-5p, miR-18a-3p, miR-1306, miR-3141, miR-345-5p, miR-432-3p, miR-628-5p, miR-363-5p, miR-1343-5p, miR-125a-5p, miR-106b-3p, miR-660, miR-124-5p, miR-106a-5p, miR-194a, novel\_51, miR-17-5p, miR-99a-5p, miR-3141, miR-377-3p, miR-20b, miR-2355-3p, miR-149-5p, miR-134-3p, let-7g-5p, miR-412-5p, miR-122b-5p, miR-7862, miR-1260b, miR-16-1-3p, miR-20a-3p, miR-216c-5p, miR-18a-3p, miR-211-5p, miR-2483-3p, miR-211, miR-145-3p, miR-1285-5p, miR-3071-5p, miR-217-5p, miR-18a-3p, miR-217, miR-204-5p, novel\_127, novel\_116, miR-222-5p, miR-147a, miR-532-5p, miR-222-5p, miR-221-5p, miR-9851-3p, miR-2426, miR-486-3p, miR-30a-3p, miR-221-5p, miR-486b-3p, miR-450a-2-3p, miR-6740-5p, novel\_19, miR-30a-3p, miR-30e-3p

MFNG ENSOARGO(MFNG 0-f

TMPRSS7 ENSOARGO( transmemi

NRL ENSOARGO( neural r

miR-30b, miR-2285p, miR-618, miR-500a-5p, miR-92a-1-5p, miR-202-5p, miR-466i-5p, miR-30d, miR-21-3p, miR-2285w, miR-369-3p, miR-664b-3p, miR-376c-3p, miR-125b-2-3p, miR-30c-5p, miR-362-3p, miR-1434-5p, miR-1197-5p, miR-188-3p, novel\_73, miR-16-1-3p, miR-361-5p, miR-1b-3p, miR-23b-3p, miR-23c, miR-2285j, miR-19b-1-5p, miR-151-3p, miR-655-3p, miR-155-5p, miR-487b-5p, miR-1468-5p, miR-129-5p, miR-539-5p, miR-3184-3p, miR-3074-5p, miR-425-5p, miR-6525, miR-181c-5p, miR-27b-5p, miR-487b-5p, miR-411, miR-30d-5p, miR-655, miR-30f, miR-339b, miR-543-3p, novel\_99, miR-660-5p, miR-216b-3p, miR-376e-3p, miR-544-3p, miR-377-3p, miR-216b-5p, miR-155-5p, miR-877-5p, miR-362-3p, miR-491-5p, miR-1468, miR-23a-3p, miR-329-3p, miR-143-5p, miR-501-3p, miR-412-3p, miR-362-3p, miR-544a, miR-101c, novel\_4, novel\_78, miR-151a-3p, miR-2300a-5p, miR-330-3p, miR-548w, miR-376b-3p, miR-9788-3p, miR-421, miR-382-3p, miR-30b-5p, miR-101-3p, miR-2440, miR-4726-5p, miR-499a-5p, miR-374a-3p, miR-2284q, miR-181d-5p, miR-502-3p, miR-1285-5p, miR-140-5p, miR-381-3p, miR-129b-5p, miR-668-5p, miR-376a-3p, miR-877-3p, miR-7857-3p, miR-2483-3p, miR-500-3p, miR-376d, miR-2285af, miR-376b-3p, miR-6119-5p, miR-30f, miR-3071-3p, miR-339a, miR-28-3p, miR-181b-5p, miR-127-5p, novel\_96, miR-200a-3p, miR-3529-3p, miR-181a-2-3p, miR-2478, miR-376c-5p, miR-1957a, miR-376b-5p, miR-2285b, miR-501-3p, miR-30a-5p, miR-300, miR-30c, miR-155-5p, miR-7641, novel\_79, miR-412, miR-2284z, novel\_121, miR-214-5p, miR-34c-3p, miR-494-5p, miR-135a-5p, miR-374b-3p, miR-592, miR-28a-3p, miR-3607-3p, miR-6128, miR-103b, miR-323-3p, miR-381-3p, miR-30e-5p, miR-301, miR-376c-5p, miR-23b, miR-3154, miR-329a, miR-376c-5p, miR-3068-3p, miR-370-3p, miR-2285aa, miR-141-3p, miR-615-5p, miR-300-3p, miR-3965, miR-376c-3p, miR-377-3p, miR-330-3p, miR-124-5p, miR-660, miR-6240, miR-324-5p, miR-6130, miR-376e-3p, miR-532-5p, miR-141-3p, miR-485-5p, miR-20b-5p, miR-17-5p, miR-93-5p, miR-93, miR-4510, miR-134-5p, miR-486b-3p, miR-664a, novel\_74, miR-320e, miR-29b-2-5p, miR-328-3p, novel\_83, miR-134-5p, miR-2284h-5p, miR-2411-5p, miR-505-3p, miR-212-5p, miR-222, miR-2284u, miR-664-5p, miR-140-3p, miR-1434-5p, miR-134, miR-2284a, miR-2284y, miR-2411, miR-486-3p, miR-376c-3p, miR-125b-2-3p, miR-29b-1-5p, miR-3064-5p, miR-20a, miR-29b-2-5p, miR-2285w, miR-200a-3p, miR-2898, novel\_17, miR-454-5p, miR-27a-3p, miR-669, miR-670-3p, miR-2319b, miR-2284g, novel\_68, miR-3064-5p, miR-505-3p, miR-6395, miR-1983, miR-412-3p, miR-221, miR-2387, miR-2428, novel\_27, novel\_101, miR-219a-5p, miR-452-5p, miR-212-3p, miR-421-5p, miR-6402, miR-576-3p, miR-20a-5p, miR-502-5p, miR-4324, miR-20b, miR-221-3p, miR-27a-3p, miR-26b-3p, miR-187-3p, miR-455-5p, miR-27b-3p, novel\_23, miR-8485, miR-296-3p, miR-654-3p, miR-2284b, miR-363-5p, miR-1388-3p, miR-124-5p, miR-3085-3p, miR-106b-5p, novel\_51, miR-17-5p, miR-106a-5p, miR-455-5p, miR-29b-1-5p, miR-197-5p, miR-296-3p, miR-548e-3p, miR-489, miR-376b-3p, miR-7859, miR-376d, miR-148b-5p, miR-500-5p, miR-1434-3p, miR-193b-5p, miR-376b-3p, miR-362-5p, miR-2426, miR-148a-5p, miR-376a-3p, miR-362-5p, miR-2478, miR-2285p, miR-2332, miR-376b-3p, miR-147-5p

miR-296-3p, miR-552-3p, miR-216b-3p, novel\_107, miR-30c-1-3p, miR-15b-5p, miR-151b, miR-582-5p, miR-377-3p, miR-30d-5p, miR-129b-3p, miR-450a-1-3p, miR-1827, miR-885-3p, miR-1895, miR-339b, miR-345-5p, miR-665-5p, miR-214, miR-3074-5p, miR-224-5p, miR-346, miR-665, miR-2285j, miR-874-5p, miR-4492, miR-451a, miR-212-5p, miR-18a-3p, miR-1247-5p, miR-7859, miR-378a-3p, miR-378i, miR-34a-5p, miR-329a-5p, miR-486-3p, miR-181b-1-3p, miR-422a, miR-345-3p, miR-324-3p, miR-26a-5p, novel\_17, miR-2484, miR-3653-3p, miR-2319b, miR-24-1-5p, miR-1185-2-3p, miR-144-5p, miR-378g, miR-3596, miR-378j, miR-1983, miR-493-5p, miR-299b-5p, miR-96-5p, miR-3956-3p, miR-2447, novel\_111, miR-877-3p, miR-361-3p, miR-490-5p, miR-3964, miR-181b-2-3p, miR-1343-3p, miR-330-3p, miR-548w, miR-1185-3p, miR-421, miR-455-3p, miR-1298-3p, miR-147a, miR-758-3p, miR-541, miR-101c, miR-1388-5p, miR-744-3p, miR-124a, miR-1388-3p, miR-8485, miR-378d, miR-16b, miR-29b-1-5p, miR-505, miR-431-5p, miR-214-3p, miR-125a, miR-2285aa, miR-2355-5p, miR-874-3p, miR-574-5p, miR-137-3p, miR-301, miR-30e-5p, miR-1248, miR-345-5p, miR-144-5p, miR-16-5p, novel\_42, miR-1197-3p, miR-125b-5p, miR-6740-5p, miR-2433, novel\_63, miR-592, miR-431, miR-18b-5p, novel\_79, miR-412, miR-1224-5p, miR-2284z, miR-450a-1-3p, miR-322-5p, miR-505-5p, miR-330-5p, miR-1343-5p, miR-1290, miR-885-3p, miR-3064-5p, miR-2285b, miR-200a, novel\_39, miR-148b-5p, miR-30f, miR-8117, miR-200a-3p, novel\_127, miR-329-5p, miR-3074-5p, novel\_68, miR-181b-3p, miR-669, miR-6535, miR-677, novel\_69, miR-374c-3p, miR-378f, miR-412-3p, miR-28c, miR-4324, miR-339-5p, miR-103a-3p, miR-31-5p, novel\_116, miR-194-3p, miR-3431, miR-134-3p, novel\_23, miR-22-3p, miR-450c-3p, miR-2113, miR-432, miR-4508, miR-497-5p, miR-16b, let-7f-2-3p, let-7f-2-3p, miR-628-5p, miR-6210, miR-132-let-7a-5p, miR-1839-3p, miR-2284b, miR-378d, miR-2284l, miR-505, miR-214-3p, let-7e, miR-1468, miR-181b-2-3p, miR-412-5p, miR-2284d, miR-142-5p, let-7g-5p, miR-148b-5p, miR-6529a, miR-378b, miR-3071-5p, miR-378c, miR-21-5p, miR-2284ab, miR-21b, miR-135a-2-3p, miR-335-5p, miR-1839-3p, miR-2285x, let-7i, miR-335, miR-2284g, miR-24-1-5p, miR-329-5p, miR-499b-5p, miR-378e, miR-374c-3p, let-7d-5p, miR-203-3p, miR-677, miR-181b-3p, miR-18b, miR-21c, miR-412-3p, miR-9851-3p, miR-544-5p, miR-378f, miR-1983, let-7e-5p, miR-329a-5p, miR-2285w, miR-30a-3p, miR-450b-5p, miR-24-2-5p, miR-148b-5p, miR-181b-1-3p, miR-2284y, let-7g, miR-2284a, miR-500a-5p, miR-422a, let-7c-5p, miR-2284m, let-7f-5p, miR-98-5p, miR-1277-5p, miR-2484, miR-21-3p, let-7k, miR-18b-5p, miR-30d-3p, miR-24-2-5p, miR-378h, miR-2284h-5p, novel\_121, miR-378i, miR-1961, miR-378a-3p, let-7d, miR-2284u, let-7a-3p, miR-148a-5p, miR-378c, let-7b, miR-2284v, miR-3607-3p, miR-425-5p, miR-214, miR-142a-5p, let-7b-5p, miR-378c, miR-34c-3p, let-7f, miR-30e-3p, miR-30a-3p, miR-1468-5p, miR-378a-3p, let-7i-5p, miR-301, miR-433-3p, miR-18a, miR-329b, miR-18a-5p, novel\_99

miR-154a, miR-423-5p, miR-809b, miR-128b-5p, novel\_111, miR-877-3p, miR-361-3p, miR-3059-5p, miR-154-3p, miR-769-5p, miR-218-5p, miR-4443, miR-1185-2-3p, let-7d-5p, miR-541-5p, miR-10b, miR-452-3p, miR-664b, miR-4792, miR-877-3p, miR-361-3p, miR-140-5p, miR-2310, miR-4532, miR-1388-3p, let-7a-5p, miR-214-3p, let-7e, miR-3955-3p, miR-29b-1-5p, miR-1306-5p, miR-1185-3p, miR-148b-5p, novel\_78, novel\_4, miR-2300a-5p, miR-2426, miR-1a-3p, let-7b-5p, miR-3184-5p, miR-206-3p, miR-769-5p, miR-6525, miR-214, miR-129-2-3p, miR-4510, let-7b, miR-433-5p, miR-4492, miR-665, miR-29b-2-5p, miR-324-3p, let-7f, let-7i-5p, miR-22-3p, miR-193b-3p, miR-6130, miR-3065-3p, miR-154a-3p, miR-2331-3p, miR-1827, miR-625-5p, miR-154b-3p, miR-339b, miR-129b-3p, miR-143-3p, miR-2411, miR-486-3p, miR-29b-1-5p, miR-487a, let-7k, miR-34b-5p, miR-98-5p, miR-185-3p, miR-216a-5p, novel\_17, miR-328-3p, miR-532-3p, miR-1b-3p, miR-18a-3p, miR-148a-5p, miR-34a-5p, novel\_73, miR-33b-3p, miR-1197-5p, miR-188-3p, miR-1961, miR-2366, miR-2300b-3p, miR-2284w, miR-449a, miR-29c-3p, miR-193b-3p, miR-656-5p, miR-206, miR-29a, novel\_1, miR-6119-3p, let-7i, miR-33a-3p, miR-34c, miR-6402, miR-576-3p, miR-502-5p, miR-4324, miR-669, miR-29a-3p, novel\_69, miR-34b, miR-146b-3p, miR-6395, let-7e-5p, miR-18a-3p, miR-3065-5p, miR-1306, miR-2387, miR-432-3p, miR-432-3p, let-7f-2-3p, miR-668-3p, miR-363-5p, miR-193a-3p, miR-1343-5p, miR-455-5p, novel\_51, novel\_116, miR-149-5p, miR-194-3p, let-7g-5p, miR-339-5p, miR-455-5p, miR-7862, miR-1260b, miR-29b, miR-22-3p, miR-10b-3p, miR-1260b, miR-486b-3p, miR-134-5p, miR-331-3p, miR-29b-3p, miR-34c-3p, miR-365a-3p, miR-769, miR-331-5p, miR-34c-5p, miR-615-5p, miR-370-3p, miR-2355-5p, miR-487a-3p, miR-1248, miR-485-5p, miR-1814c, miR-7144-5p, miR-3154, miR-200a, miR-3065-3p, let-7g, miR-148b-5p, miR-1, miR-29b-2-5p, miR-543-3p, miR-4792, let-7d-5p, miR-34b, miR-2404, miR-25, let-7e-5p, miR-9-3p, miR-195a-5p, miR-1296-5p, miR-3059-5p, miR-449a, miR-9-3p, miR-361-3p, let-7i, miR-16a, miR-34c, miR-15a, miR-128-1-5p, miR-122-3p, let-7g-5p, miR-3962, miR-6239, miR-4508, miR-497-5p, miR-16b, miR-424-5p, let-7a-5p, miR-16b, miR-182-5p, let-7e, miR-196b-5p, miR-296-3p, miR-182-5p, miR-3065-3p, let-7i-5p, miR-151b, miR-15b-5p, miR-34c-5p, miR-885-3p, miR-16-5p, let-7b, let-7b-5p, miR-132-5p, let-7f, miR-424-5p, miR-151-5p, miR-15a-5p, miR-340-5p, miR-322-5p, miR-2366, miR-1961, miR-196a-5p, miR-34a-5p, miR-664-5p, let-7d, miR-885-3p, let-7g, miR-1957a, miR-3065-3p, miR-122-3p, let-7c-5p, miR-6119-5p, miR-543-5p, let-7k, miR-34b-5p, let-7f-5p, miR-98-5p, miR-2898

miR-411-5p, miR-3956-5p, miR-432-5p, miR-26b-5p, miR-130b-5p, novel\_4, miR-885-3p, miR-130b-5p, miR-10b-3p, miR-885-3p, miR-23b-5p, miR-432, miR-26a-5p

miR-200b, novel\_83, miR-9788-3p, miR-20b, miR-429-3p, miR-106a, miR-30b-3p, miR-19b-3p, miR-200b-3p, miR-4508, miR-744-5p, miR-30b-3p, novel\_39, miR-106a-5p, miR-20a, miR-106a, miR-200c-3p, miR-200c, miR-17-5p, miR-106b-5p, miR-106a-5p, miR-19a-3p, miR-20b-5p, miR-93-5p, miR-17-5p, miR-3154, miR-93, miR-423-5p, miR-3184-5p, miR-128-1-5p, miR-4492, miR-2433, miR-20a-5p

THTPA ENSOARGO(thiamine)

ZFH2 ENSOARGO(zinc fin.)

CD200 ENSOARGO(CD200 mo)

NRBP1 ENSOARGO(nuclear)

miR-670-3p, miR-639b, miR-195a-5p, miR-135b-5p, miR-2285k, miR-450b-3p, miR-378b, miR-2387, novel\_27, miR-3959-3p, miR-211, miR-17-3p, miR-2285x, miR-3957-3p, novel\_120, miR-342-3p, miR-147-5p, miR-502b, miR-16a, miR-15a, miR-544b, miR-665, miR-187-3p, miR-30b-3p, miR-2284ab, miR-3071-5p, miR-145a-5p, miR-181a-5p, miR-1285, miR-1434-3p, miR-345-5p, miR-466f-3p, miR-1343-5p, miR-141-3p, miR-615-5p, miR-215-5p, miR-671-5p, miR-10b-3p, miR-320a, miR-362-5p, miR-381-3p, miR-378c, miR-145-3p, miR-500b-5p, miR-1306-5p, miR-486b-3p, miR-204-5p, miR-135a-5p, miR-331-3p, miR-1306-3p, miR-551b-3p, miR-34c-3p, miR-378h, miR-6516-5p, miR-7641, miR-496, miR-200b-3p, miR-582-3p, miR-300, miR-501-3p, miR-345-3p, miR-2284a, miR-181a-2-3p, miR-181b-5p, miR-200c-3p, miR-17-3p, miR-2898, miR-339a, miR-30c-2-3p, miR-200c, miR-2285af, miR-3082-5p, miR-378e, miR-452-3p, miR-877-3p, miR-502-3p, miR-362-5p, miR-181d-5p, miR-452-5p, miR-2284q, miR-335, miR-500-5p, miR-9788-3p, miR-222-5p, miR-3120-5p, miR-544a, miR-450b-5p, miR-378c, miR-30b-3p, miR-412-3p, miR-7857, miR-378b, miR-30c-1-3p, miR-424-5p, miR-362-3p, miR-1306-5p, miR-5126, miR-342, miR-320b, miR-877-5p, miR-193b-3p, miR-6516, miR-544-3p, miR-192-5p, miR-182-5p, miR-496-3p, miR-378a-3p, let-7g-3p, miR-21a-3p, miR-6134, miR-2330-3p, miR-3074-2-3p, miR-378c, miR-539-5p, miR-208b-5p, miR-424-5p, miR-17-3p, miR-320e, miR-338-5p, miR-19b-1-5p, miR-200b, miR-15a-5p, miR-383-5p, miR-3600, miR-1b-3p, miR-548e-3p, miR-4429, miR-140-3p, miR-124-3p, miR-215-5p, miR-362-3p, novel\_133, miR-29b-1-5p, miR-183-5p, miR-21-3p, miR-320d, miR-216a-5p, miR-374a-5p, miR-320c, miR-669, miR-378f, miR-1306, miR-2284w, miR-193b-3p, miR-335-5p, miR-6119-3p, novel\_87, miR-149-5p, miR-3431, miR-339-5p, miR-31-5p, miR-2284v, miR-188-5p, miR-107-5p, miR-16b, novel\_23, miR-107-novel\_63, miR-2433, miR-502-5p, miR-125b-5p, miR-17-3p, miR-592, miR-17-3p, miR-326-3p, miR-3591-3p, miR-345-5p, miR-345-5p, miR-299b-5p, miR-671-5p, miR-186-5p, miR-548o-3p, miR-30c-1-3p, novel\_68, miR-125a, miR-21-3p, miR-489, miR-3596, miR-499a-3p, miR-499b-3p, miR-181b-3p, miR-677, miR-326, miR-125b, miR-30c-2-3p, miR-127-5p, miR-17-3p, miR-378a-5p, miR-125a-5p, miR-216c-5p, miR-195a-3p, miR-181b-1-3p, miR-30c-1-3p, miR-345-5p, miR-4791, miR-432, miR-5703, miR-330-5p, miR-412-3p, miR-219a-1-3p, miR-16-2-3p, miR-181b-2-3p, miR-412, miR-758-5p, miR-432-5p, miR-3535, miR-149-5p, miR-455-3p

GSTM3

ENSOARGO(glutathi

ATG16L1

ENSOARGO(autophag



miR-3529-3p, miR-1, miR-30a-3p, miR-29b-2-5p, miR-28b, miR-199a-5p, miR-29a-5p, novel\_96, miR-1224-5p, miR-322-5p, miR-483-3p, miR-450a-1-3p, miR-214-5p, novel\_121, miR-3578, miR-1343-5p, miR-501-3p, miR-300, miR-6128, miR-16-5p, miR-410-5p, miR-2433, miR-2332, miR-125b-5p, miR-135a-5p, miR-138-5p, miR-204-5p, miR-2355-5p, miR-125a, miR-199a-5p, miR-381-3p, miR-3154, miR-329a, miR-7144-5p, miR-130b-5p, miR-6240, miR-101-5p, miR-296-3p, miR-503-5p, miR-296-3p, miR-330-3p, miR-194a, miR-483-3p, miR-1343-5p, miR-125a-5p, miR-2285g, miR-503-5p, novel\_116, miR-194-3p, miR-2113, miR-1434-3p, miR-450c-3p, miR-194-5p, miR-3071-5p, miR-138, miR-16b, miR-2284ab, miR-497-5p, miR-211, miR-323c, miR-199b-5p, miR-3613, miR-15a, miR-28c, miR-16a, miR-206, miR-378b, miR-3074-5p, miR-329-5p, miR-216b-3p, miR-320b, miR-26b-5p, miR-374c-3p, miR-6535, miR-2285ab, miR-7975, miR-195a-5p, miR-135b-5p, miR-329a-5p, miR-2285w, miR-503-5p, miR-130a-5p, miR-26a-5p, miR-3601, miR-125b, miR-202-5p, miR-3653-3p, miR-221-5p, miR-2484, miR-21-3p, miR-3600, miR-30d-3p, miR-383-5p, miR-7859, miR-15a-5p, miR-2284h-5p, miR-532-3p, miR-362-3p, miR-5703, miR-142-3p, miR-539-5p, miR-145a-3p, miR-3074-5p, miR-425-5p, miR-214, miR-6525, miR-206-3p, miR-338-3p, miR-2285j, let-7b-3p, miR-30e-3p, miR-30a-3p, miR-29b-2-5p, miR-450b-3p, miR-424-5p, miR-130b-5p, miR-221-5p, miR-504-5p, miR-2284s, miR-139-5p, miR-204-3p, miR-15b-5p, let-7f-1-3p, miR-450a-1-3p, miR-2285c, miR-3613-5p, miR-129b-3p, miR-433-3p, miR-2312, miR-574-3p, miR-101b-3p, miR-424-5p, miR-193a, miR-8485, miR-758-3p, miR-2310, miR-362-3p, miR-16b, miR-491-5p, novel\_124, miR-199b-5p, miR-214-3p, novel\_78, miR-409b, miR-330-3p, miR-455-3p, miR-216a-3p, miR-2285e, miR-2284r, miR-329-3p, miR-541, miR-1a-3p, miR-501-3p, miR-758-3p, miR-362-3p, miR-101c, miR-3120-5p, miR-3050-5p, miR-

miR-503-5p, miR-149-5p, miR-187-3p, miR-377-5p, miR-29b, miR-16b, miR-30b-3p, miR-497-5p, miR-2889, miR-7862, miR-7b-5p, miR-1285, miR-223-3p, miR-1843b-5p, miR-450c-3p, miR-3071-5p, miR-145a-5p, miR-2285r, miR-345-5p, miR-483-3p, miR-378a-5p, miR-125a-5p, miR-7-5p, miR-503-5p, miR-146a, miR-365b-5p, miR-197-5p, miR-3141, novel\_51, miR-29a-3p, miR-677, miR-181b-3p, novel\_68, miR-3074-5p, miR-146b-5p, miR-6395, miR-195a-5p, miR-505-3p, miR-3141, miR-18b, miR-326-3p, novel\_27, miR-2428, miR-199b-5p, miR-29c-3p, miR-29a, miR-656-5p, miR-421-5p, miR-15a, miR-502-5p, miR-1247-3p, miR-6402, miR-28c, miR-16a, miR-322-5p, miR-9-5p, miR-505-5p, miR-2411-5p, miR-483-3p, miR-450a-1-3p, miR-2284z, miR-129-1-3p, miR-486-5p, miR-429-3p, miR-431, miR-18b-5p, miR-885-3p, miR-200b-3p, miR-29d-3p, miR-330-5p, miR-148b-5p, miR-28b, miR-200a, miR-199a-5p, miR-2285b, miR-450c-5p, miR-3529-3p, miR-29b-2-5p, miR-4286, miR-181a-2-3p, miR-200c-3p, miR-191-3p, miR-200a-3p, miR-2285af, miR-200c, miR-125a-3p, miR-199a-5p, miR-154b-5p, miR-141-3p, miR-125a, miR-876-3p, miR-345-5p, miR-7144-5p, miR-485-5p, miR-671-5p, miR-18a, miR-3154, miR-365a-5p, miR-6128, miR-16-5p, miR-193a-5p, miR-103b, miR-486b-3p, miR-29b-3p, miR-410-5p, miR-2332, miR-125b-5p, miR-142-3p, miR-1298-3p, miR-455-3p, miR-9788-3p, miR-2300a-5p, novel\_78, miR-1343-3p, miR-222-5p, miR-145b, miR-181b-2-3p, miR-2284aa, miR-484, miR-541, miR-7857, miR-30b-3p, miR-3962, miR-424-5p, let-7c-3p, miR-146b, miR-199b-5p, miR-326, miR-431-5p, miR-29b-1-5p, miR-16b, miR-3082-5p, miR-4443, miR-499b-5p, miR-541-5p, miR-504, miR-199b-5p, miR-129b-5p, miR-8095, miR-541-3p, miR-9-5p, miR-499a-5p, miR-628-3p, miR-4726-5p, miR-450a-5p, miR-2285t, miR-490-5p, miR-2284q, miR-222-5p, miR-200b, miR-15a-5p, novel\_83, miR-2284b-5p, miR-228-3p, miR-505-3p, miR-22b-3p, miR-218-1-3p, miR-150-5p, miR-186-5p, miR-216a-3p, miR-203b-5p

SLC22A17 ENSOARG0C solute c:

IFT172 ENSOARG0C intrafla.

miR-16b, miR-497-5p, miR-19b-2-5p, miR-7b-5p, miR-223-3p, miR-431-3p, miR-450c-3p, miR-3431, novel\_116, miR-194-3p, miR-149-5p, miR-31-5p, miR-339-5p, miR-7-5p, novel\_51, miR-2411-3p, miR-668-3p, let-7f-2-3p, let-7f-2-3p, miR-412-3p, miR-378f, miR-3970, miR-216a-3p, miR-374c-3p, miR-411b-3p, miR-299b-3p, miR-320c, miR-669, miR-3074-5p, miR-216b-3p, miR-3120-3p, miR-29a, miR-421-5p, miR-4324, miR-199b-5p, miR-2284w, miR-29c-3p, miR-1290, miR-2427, miR-330-5p, miR-322-5p, miR-9-5p, miR-450a-1-3p, novel\_121, miR-299a-3p, miR-2285ad, miR-429-3p, novel\_79, miR-412, miR-127-5p, novel\_127, miR-219-3p, miR-29a-5p, novel\_39, miR-450c-5p, miR-2285b, miR-192-3p, miR-767, miR-2318, miR-1248, miR-331-5p, miR-200a-5p, miR-331-5p, miR-3959-5p, miR-2355-5p, miR-542-5p, miR-125a, miR-331-5p, miR-125b-5p, miR-193a-5p, miR-16-5p, miR-1388-5p, miR-101c, miR-541, miR-496-5p, miR-147a, miR-376b-3p, miR-1298-3p, miR-421, novel\_78, miR-1185-5p, miR-199b-5p, miR-214-3p, miR-505, miR-29b-1-5p, miR-16b, miR-378d, miR-8485, miR-1388-3p, miR-744-3p, miR-3963, miR-96-5p, miR-376a-3p, miR-1983, miR-409-5p, miR-25, miR-499a-3p, miR-203-3p, miR-4443, miR-1185-2-3p, miR-2285u, miR-211-5p, miR-3968, miR-218-5p, novel\_82, miR-2440, miR-877-3p, miR-9-5p, novel\_73, miR-184-3p, miR-34a-5p, miR-378i, miR-2366, miR-378a-3p, miR-1434-5p, miR-328-3p, miR-18a-3p, miR-212-5p, miR-30d-3p, miR-3601, miR-345-3p, miR-422a, miR-92a-1-5p, miR-376a-5p, miR-142a-3p, miR-486-3p, miR-2424, miR-339b, miR-1827, miR-450a-1-3p, miR-433-3p, miR-499b-3p, miR-10a, miR-15b-5p, miR-548o-3p, miR-4492, miR-130b-5p, miR-669a-3p, miR-30e-3p, miR-30a-3p, miR-219b-3p, miR-151-3p, miR-665, miR-3604, miR-664a-5p, miR-224-5p, miR-346, miR-3074-5p, miR-665-5p, miR-214, miR-29b, miR-455-5p, miR-1434-3p, miR-374b-3p, miR-544b, miR-187-3p, miR-200a-3p, miR-450a-2-3p, novel\_124, miR-324-3p, miR-362-3p, miR-2957, miR-664-3p, miR-377-3p, miR-200a, miR-29a-5p, miR-432-3p, miR-2403, miR-195a-3p, miR-493-5p, miR-105-3p, miR-329a-5p, miR-582-3p, miR-362-3p, miR-1388-5p, miR-1843b-5p, miR-362-3p, miR-329-3p, miR-532-3p, miR-3431, miR-425-3p, miR-7641, miR-1b-3p, miR-133b-5p, miR-669a-3p, miR-3969, miR-382-5p, miR-338-5p, miR-144, miR-331-3p, miR-133a-5p, miR-2433, miR-9-3p, miR-665-5p, miR-590-3p, novel\_42, miR-9-3p, miR-493-5p, miR-329a, miR-504, let-7g-3p, miR-378b, miR-129b-3p, miR-144-3p, miR-216b-5p, miR-2483-3p, miR-377-3p, miR-141-3p, miR-615-5p, miR-329-5p, miR-504-5p, miR-664b, miR-219b-3p, miR-500a-5p, miR-30c-2-3p, miR-2957, miR-216a-5p, miR-2285y, miR-219-3p, miR-2285n, miR-3964, miR-4492, miR-499a-5p, miR-32-3p, miR-143-3p, miR-219a-2-3p, miR-30c-1-3p, miR-2285r, miR-1248, miR-2355-5p, miR-2285u, miR-32-3p, miR-2285ad, miR-30c-1-3p, miR-134-3p, miR-147a, miR-378g

miR-45b-5p, miR-6239, miR-138, miR-29b, miR-3071-5p, miR-181a-5p, miR-2355-3p, miR-103, miR-544b, miR-20b, miR-432-5p, miR-503-5p, miR-185-5p, miR-133b-5p, miR-660, miR-125a-5p, miR-197-5p, miR-455-5p, miR-106a-5p, miR-17-5p, miR-224-5p, miR-503-5p, miR-363-5p, miR-130b-5p, miR-9851-3p, miR-6395, miR-195a-5p, miR-6516-3p, miR-450b-3p, miR-107, miR-2387, miR-18b, miR-146b-3p, miR-323a-5p, miR-2404, miR-29a-3p, miR-320b, miR-147-5p, miR-16a, miR-15a, miR-502-5p, miR-133a-5p, miR-20a-5p, novel\_27, miR-2428, miR-211, miR-24-3p, miR-3957-3p, novel\_101, miR-17-3p, miR-219b-3p, miR-135a-2-3p, miR-105-2, miR-411-3p, miR-29d-3p, miR-501-3p, miR-345-3p, miR-582-3p, miR-378h, miR-107, miR-543-5p, miR-450a-2-3p, miR-17-3p, miR-339a, miR-199a-5p, miR-380-5p, miR-181a-2-3p, miR-7144-5p, miR-671-5p, miR-485-5p, miR-17-5p, miR-18a, miR-3154, miR-2448-3p, miR-199a-5p, miR-3965, miR-769, miR-370-3p, miR-486b-3p, miR-204-5p, miR-28-5p, miR-138-5p, miR-331-3p, miR-3969, miR-29b-3p, miR-2332, miR-378c, miR-93, miR-3607-3p, miR-103b, miR-16-2-3p, miR-378c, miR-544a, miR-101a-5p, miR-484, miR-378b, miR-4791, miR-216a-3p, miR-9788-3p, miR-142-3p, miR-222-5p, miR-105-1, novel\_4, miR-2300a-5p, miR-3085-3p, miR-25-5p, miR-3955-3p, miR-362-3p, miR-424-5p, miR-106a-5p, novel\_94, miR-877-3p, miR-129b-5p, miR-199b-5p, miR-378e, miR-7977, miR-3064-5p, miR-20a-3p, miR-2285t, miR-4726-5p, miR-769-5p, miR-107-5p, miR-9-3p, miR-502-3p, miR-3059-5p, novel\_60, miR-212-3p, miR-378d, miR-188-3p, miR-1197-5p, miR-5703, miR-140-3p, miR-376a-5p, miR-362-3p, novel\_83, miR-532-3p, miR-340-5p, miR-148b-3p, miR-15a-5p, miR-3600, miR-221-5p, miR-106a, miR-760-3p, miR-125b, miR-185-3p, miR-196a-3p, miR-29b-1-5p, miR-125b-2-3p, miR-130a-5p, miR-20a, miR-216c-5p, novel\_99, miR-18a-5p, miR-21a-3p, miR-204-3p, miR-877-

miR-66b-5p, miR-214, miR-145a-3p, miR-4510, miR-6134, miR-3184-5p, miR-224-5p, miR-665, miR-320e, miR-874-5p, miR-504-5p, miR-30c-1-3p, miR-221-5p, miR-22-3p, novel\_32, miR-204-3p, miR-323-5p, miR-6130, miR-139-5p, miR-582-5p, miR-544-3p, miR-598-3p, miR-2285c, miR-21a-3p, miR-186-5p, miR-1827, miR-625-5p, miR-345-5p, miR-5100, miR-29b-1-5p, miR-345-3p, miR-185-3p, miR-324-3p, miR-216a-5p, miR-26a-5p, miR-299-3p, miR-21-3p, miR-2484, miR-34b-5p, miR-221-5p, miR-466i-5p, miR-320d, miR-3960, miR-18a-3p, novel\_83, miR-1197-5p, miR-188-3p, miR-5703, miR-2904, miR-378d, miR-34a-5p, miR-2284u, miR-148a-5p, miR-4429, novel\_73, miR-3956-3p, novel\_60, miR-2447, miR-3059-5p, miR-423-5p, miR-502-3p, miR-877-3p, miR-361-3p, miR-301a-5p, miR-1973, miR-2440, novel\_82, miR-2285t, miR-3968, miR-4726-5p, miR-211-5p, miR-7977, miR-499b-5p, miR-2319b, miR-2284g, miR-139-5p, miR-500-3p, miR-4443, miR-203-3p, miR-2483-3p, miR-129b-5p, miR-378j, miR-199b-5p, miR-361-3p, miR-544-5p, novel\_94, miR-9-3p, miR-504, miR-2284b, let-7c-3p, miR-1388-3p, miR-193a, miR-4532, miR-30c-1-3p, miR-29b-1-5p, novel\_115, miR-326, miR-1306-5p, miR-320b, miR-214-3p, miR-199b-5p, novel\_124, novel\_4, miR-2300a-5p, miR-1343-3p, miR-2285e, miR-455-3p, miR-9788-3p, miR-148b-5p, miR-147a, miR-425-3p, miR-30b-3p, miR-501-3p, miR-412-3p, miR-301b-5p, miR-6529a, miR-101c, miR-544a, miR-1388-5p, miR-1306-5p, miR-28a-3p, miR-365a-5p, miR-323-3p, miR-331-3p, miR-135a-1-3p, miR-2332, miR-204-5p, miR-141-3p, miR-615-5p, miR-598-3p, miR-2355-5p, miR-370-3p, miR-3068-3p, miR-874-3p, miR-574-5p, miR-199a-5p, miR-34c-5p, miR-300-3p, miR-3154, miR-320a, miR-23a-5p, miR-345-5p, miR-329b, miR-4286, miR-2403, miR-2284a, miR-192-3p, miR-1271-3p, novel\_39, miR-1957a, miR-199a-5p, miR-2284v, miR-148b-5p, miR-30c-2-3p, miR-30f, novel\_127, miR-543, miR-154a-3p, miR-487a-3p, miR-6240, miR-487a, miR-330-3p, miR-376d, miR-376b-3p, miR-216b-5p, miR-330-3p, miR-376b-3p, miR-376b-3p, miR-376a-3p, miR-154-3p, miR-154b-3p

RIBC2 ENSOARGO(RIB43A d

AMN1 ENSOARGO(antagoni

miR-130b-5p, miR-2483-5p, miR-363-5p, miR-432-3p, miR-296-3p, miR-7-5p, miR-296-3p, novel\_51, miR-378a-5p, miR-660, miR-125a-5p, miR-1343-5p, miR-193a-3p, miR-665, miR-339-5p, miR-3535, miR-134-3p, miR-185-5p, miR-149-5p, miR-194-3p, miR-2355-3p, miR-7b-5p, miR-1285, miR-1843b-5p, miR-22-3p, miR-450c-3p, miR-3071-5p, miR-138, miR-16b, miR-30b-3p, miR-1260b, miR-497-5p, miR-4508, miR-7862, miR-744-5p, miR-335-5p, miR-193b-3p, miR-1193, miR-2285x, miR-211, miR-371b-3p, miR-24-3p, miR-449a, miR-326-3p, miR-2428, miR-15a, miR-576-3p, miR-6402, miR-133a-5p, miR-16a, miR-34c, novel\_1, miR-625-3p, miR-203b-5p, miR-199c, miR-216b-3p, miR-320b, miR-323a-5p, miR-146b-3p, miR-34b, miR-677, miR-669, miR-6535, miR-181b-3p, miR-376b-5p, miR-18a-3p, miR-1291, miR-195a-5p, miR-29b-2-5p, miR-4286, miR-24-2-5p, miR-2478, miR-148b-5p, miR-1957a, miR-3065-3p, miR-1260a, miR-205-5p, miR-2285af, miR-8117, miR-339a, miR-2898, miR-127-5p, novel\_96, miR-543-5p, novel\_127, miR-1224-5p, novel\_79, miR-431, miR-9-5p, miR-322-5p, miR-582-3p, miR-450a-1-3p, miR-214-5p, miR-486-5p, miR-1343-5p, miR-330-5p, miR-23b-5p, miR-6128, miR-16-5p, miR-500b-5p, miR-1260b, miR-145-3p, miR-410-5p, miR-370-5p, miR-125b-5p, miR-331-3p, miR-100-3p, miR-6740-5p, miR-138-5p, miR-331-5p, miR-3432a, miR-28-5p, miR-486b-3p, miR-204-5p, miR-592, miR-3068-3p, miR-125a, miR-615-5p, miR-34c-5p, miR-3965, miR-133c, miR-154b-5p, miR-331-5p, miR-376c-5p, miR-362-5p, miR-10b-3p, miR-376c-5p, miR-23a-5p, miR-1388-3p, miR-101b-3p, miR-494-3p, miR-424-5p, miR-744-3p, miR-3187-3p, miR-431-5p, miR-326, miR-16b, miR-182-5p, miR-491-5p, miR-214-3p, miR-2300a-5p, miR-199b-3p, novel\_78, novel\_4, miR-1343-3p, miR-5010-3p, miR-181b-2-3p, miR-222-5p, miR-1298-3p, miR-500-5p, miR-9788-3p, miR-296-5p, miR-143-5p, miR-1791, miR-30b-3p, miR-1388-5p, miR-3190-5p, miR-885-5p, miR-

miR-1843b-5p, miR-1434-3p, miR-2113, miR-432, miR-3071-5p, miR-30b-3p, miR-2284ab, miR-3955-5p, miR-3431, miR-134-3p, miR-432-5p, miR-2284d, miR-412-5p, miR-377-3p, miR-146a, miR-365b-5p, miR-3141, miR-660, miR-125a-5p, miR-493-5p, miR-668-3p, miR-22841, miR-345-5p, miR-539-3p, miR-3141, miR-376b-3p, miR-3065-5p, miR-378f, miR-6395, miR-146b-5p, miR-216b-3p, miR-378b, miR-34b, miR-6535, miR-677, miR-133a-5p, miR-4324, miR-34c, miR-6123, miR-22-5p, miR-24-3p, miR-449a, miR-496, miR-7641, miR-378h, miR-545-5p, miR-2285af, miR-376b-3p, miR-217, miR-2898, miR-543-5p, miR-3529-3p, miR-148b-5p, miR-3956-5p, miR-490-3p, miR-1271-3p, miR-29a-5p, miR-345-5p, miR-2318, miR-1248, miR-190a-3p, miR-3074-1-3p, miR-503-3p, miR-574-5p, miR-487a-3p, miR-125a, miR-615-5p, miR-3956, miR-365a-3p, miR-34c-5p, miR-2284k, miR-125b-5p, miR-331-3p, miR-592, miR-486b-3p, miR-31-3p, miR-2284v, miR-144-5p, miR-133a-3p, miR-378c, miR-365a-5p, miR-378b, miR-484, miR-30b-3p, miR-1388-5p, miR-378c, miR-3120-5p, miR-2300a-5p, miR-181b-2-3p, miR-147a, miR-376b-3p, miR-214-3p, miR-146b, miR-378d, miR-491-3p, miR-4532, miR-8485, miR-129b-5p, miR-493-5p, miR-376a-3p, miR-335-3p, miR-489, miR-378g, miR-378e, miR-376d, miR-454-5p, miR-144-5p, miR-2440, miR-107-5p, miR-3968, miR-4726-5p, miR-2284q, miR-154-3p, miR-490-5p, miR-885-5p, miR-3956-3p, novel\_60, miR-3059-5p, miR-32-3p, miR-452-5p, miR-6527, miR-877-3p, miR-423-5p, novel\_133, miR-378i, miR-140-3p, miR-378a-3p, miR-217-5p, miR-1193, miR-33b-3p, miR-378d, miR-34a-5p, miR-548e-3p, miR-485-3p, miR-212-5p, miR-3600, miR-487a-3p, miR-7859, miR-210-3p, miR-328-3p, miR-422a, miR-125b, miR-466i-5p, miR-21-3p, miR-34b-5p, miR-3653-3p, miR-487a, miR-2887, miR-5100, miR-2424, miR-146a-5p, miR-2432, miR-486-3p, miR-133-3p, miR-129b-3p, miR-154b-3p, miR-345-5p, miR-148a-5p, miR-378d, miR-362-3p, novel\_83, miR-532-3p, miR-328-3p, miR-6517, miR-1b-3p, miR-181b-5p, miR-1260a, novel\_17, miR-210-5p, miR-30c-2-3p, miR-125b, miR-185-3p, miR-486-3p, miR-2432, miR-329a, miR-485-5p, miR-193b-3p, miR-6130, miR-154b-5p, miR-30c-1-3p, miR-370-3p, miR-125a, miR-4492, miR-486b-3p, miR-125b-5p, miR-1260b, miR-3184-5p, miR-181c-5p, miR-1306-5p, miR-4510, miR-193a-5p, miR-362-3p, miR-30b-3p, miR-1260b, miR-381-5p, miR-484, miR-329-3p, miR-181a-5p, miR-7857, miR-30b-3p, miR-148b-5p, novel\_78, miR-125a-5p, miR-381-5p, miR-193a-3p, miR-5126, miR-3141, miR-362-3p, miR-30c-1-3p, miR-8485, miR-4532, miR-1388-3p, miR-6395, miR-3141, miR-655-5p, miR-128-1-5p, miR-371b-3p, miR-3959-3p, miR-24-3p, miR-423-5p, miR-193b-3p, miR-181d-5p

C1orf94 ENSOARGO(chromosome)

MMP14 ENSOARGO(matrix metalloproteinase)

miR-23c, miR-23b-3p, miR-2284h-5p, miR-18a-3p, miR-142-3p, miR-493-3p, miR-148a-5p, miR-16-1-3p, miR-218-1-3p, miR-378i, miR-1434-5p, miR-217-5p, miR-378a-3p, miR-181b-1-3p, miR-376a-5p, miR-380-3p, miR-2424, miR-2285w, miR-329a-5p, miR-10a-3p, miR-195a-3p, miR-210-5p, miR-422a, miR-219b-5p, miR-500a-5p, miR-216b-5p, miR-582-5p, miR-548o-3p, miR-1277-3p, miR-504-5p, miR-2331-3p, miR-30c-1-3p, miR-345-5p, miR-186-5p, miR-543-3p, miR-433-3p, miR-655, miR-598-3p, miR-181c-5p, miR-3074-5p, miR-451a, miR-669a-3p, miR-130b-5p, miR-129-5p, miR-665, miR-3604, miR-1298-3p, miR-153, miR-1185-3p, miR-455-3p, miR-148b-5p, miR-548w, miR-181b-2-3p, miR-301b-5p, miR-323b, miR-378d, miR-2310, miR-1b-5p, miR-101b-3p, miR-1388-3p, miR-23a-3p, miR-487b-5p, miR-103a-2-5p, miR-146b, miR-153-3p, miR-182-5p, miR-323b-3p, miR-29b-1-5p, miR-2483-3p, miR-1185-2-3p, miR-203-3p, miR-2319b, miR-299b-5p, miR-376a-3p, miR-493-5p, miR-140-5p, miR-877-3p, miR-7705, miR-3956-3p, miR-9-5p, miR-3968, miR-101-3p, miR-2440, miR-301a-5p, miR-9-5p, miR-2285ad, miR-155-5p, miR-23b-5p, miR-2285b, miR-200a, miR-29a-5p, miR-3064-5p, miR-28-3p, novel\_127, miR-125a-3p, miR-205-5p, miR-331-5p, miR-300-3p, miR-223-5p, miR-874-3p, miR-2355-5p, miR-542-5p, miR-345-5p, miR-876-3p, miR-1248, miR-23b, miR-1260b, miR-28a-3p, novel\_63, miR-16-1-3p, miR-27b-3p, miR-26a-2-3p, miR-19b-2-5p, miR-708-3p, miR-432, miR-22-3p, miR-493-5p, miR-628-5p, let-7f-2-3p, let-7f-2-3p, miR-668-3p, miR-378a-5p, miR-296-3p, miR-146a, novel\_69, miR-181b-3p, miR-677, miR-144-3p, miR-329-5p, miR-3074-5p, miR-378f, miR-146b-5p, miR-1306, miR-2284w, miR-374c-5p, miR-6119-3p, miR-625-3p, miR-485-3p, miR-487a-3p, miR-616-3p, miR-485-3p, miR-3600, miR-2408, miR-2300b-3p, novel\_133, miR-1197-5p, miR-1193, miR-363-5p, miR-3064-5p, miR-130b-5p, miR-3064-5p, miR-423-3p, miR-6535, miR-6134, novel\_19, miR-1843b-5p, miR-625-5p, miR-130b-5p, miR-2898, miR-3085-3p, miR-203-3p, miR-670-3p, miR-6130, miR-7857-3p, miR-2284s, miR-3064-5p, miR-6134, miR-2428, miR-1260b, miR-2330-3p, miR-665-5p, miR-1296-5p, miR-4510, miR-3059-5p, miR-130b-5p, miR-4492, miR-208b-5p, miR-22-5p, miR-490-5p, miR-4726-5p, miR-320e, miR-665, miR-551b-3p, miR-2459, miR-9788-3p, miR-532-3p, miR-2411-5p, miR-185-5p, miR-496-5p, novel\_78, miR-6517, miR-1343-3p, miR-4508, miR-1260b, miR-101a-5p, miR-30b-3p, miR-5703, miR-30b-3p, miR-1285, miR-2284r, miR-143-3p, miR-1b-5p, miR-2411, miR-2284l, miR-4286, miR-363-5p, miR-3064-5p, miR-2330-5p, miR-1388-3p, miR-130b-5p, miR-30b-3p, miR-3085-3p, miR-2898, novel\_51, miR-185-3p, miR-3601, miR-1260a



miR-639b, miR-505-3p, miR-378f, miR-6516-3p, miR-1291, miR-19a-3p, miR-150-5p, miR-3591-3p, miR-3065-5p, miR-2285ab, miR-376b-5p, miR-2387, miR-677, miR-181b-3p, miR-374c-3p, miR-29a-3p, miR-670-3p, miR-3120-3p, miR-10a-5p, miR-7-1-3p, miR-3074-5p, miR-22-5p, miR-6123, miR-147-5p, miR-199c, miR-29a, novel\_1, miR-4324, miR-28c, miR-323c, miR-17-3p, novel\_101, miR-29c-3p, miR-2285x, miR-1193, miR-26a-2-3p, miR-29b, miR-16-1-3p, miR-197-3p, miR-194-5p, novel\_23, miR-374b-3p, miR-873a-5p, miR-223-3p, miR-181a-5p, miR-3431, miR-122-3p, miR-452-5p, miR-378a-5p, miR-197-5p, miR-194a, miR-224-5p, miR-296-3p, miR-377-3p, miR-296-3p, miR-503-3p, miR-2285r, miR-432-3p, miR-376c-5p, novel\_48, miR-1814c, miR-1248, miR-10a-3p, miR-329a, miR-23b, miR-376c-5p, miR-30e-5p, miR-301, miR-365a-3p, miR-542-5p, miR-141-3p, miR-615-5p, miR-574-5p, miR-503-3p, miR-874-3p, miR-592, miR-29b-3p, miR-370-5p, miR-145-3p, miR-378c, miR-10a-5p, miR-496, miR-29d-3p, miR-30a-5p, miR-545-5p, miR-2284z, miR-302a-5p, miR-378h, miR-6516-5p, miR-1224-5p, miR-200a-3p, miR-17-3p, miR-181b-5p, miR-6119-5p, miR-200a, miR-29a-5p, miR-490-3p, miR-28b, miR-2478, miR-30a-3p, miR-4286, miR-181a-2-3p, novel\_94, miR-378j, miR-129b-5p, miR-7857-3p, miR-378e, miR-3082-5p, miR-139-5p, miR-452-3p, miR-490-5p, miR-3964, miR-499a-5p, miR-4726-5p, miR-107-5p, miR-30b-5p, miR-2440, novel\_111, miR-2285f, miR-194b-5p, miR-181d-5p, miR-452-5p, miR-2447, miR-101c, miR-2284aa, miR-378c, miR-1388-5p, miR-362-3p, miR-101a-5p, miR-323b, miR-378b, miR-329-3p, miR-10b, miR-5010-3p, miR-181b-2-3p, miR-1343-3p, miR-199b-3p, miR-409b, miR-103a-2-5p, miR-487b-5p, miR-362-3p, miR-505, miR-323b-3p, miR-8485, miR-2310, miR-378d, miR-23a-3p, miR-744-3p, miR-1388-3p, miR-101b-3p, miR-382-3p, miR-543-3p, novel\_99, miR-186-5p, miR-2312, miR-129b-3p, miR-

miR-34b, miR-323a-5p, miR-10a-5p, miR-320b, miR-1291, miR-6395, miR-195a-5p, miR-135b-5p, miR-18b, miR-18a-3p, miR-371b-3p, miR-24-3p, miR-211, miR-449a, miR-326-3p, miR-17-3p, miR-3957-3p, novel\_1, miR-502b, miR-15a, miR-502-5p, miR-33a-3p, let-7i, miR-16a, miR-34c, let-7g-5p, miR-185-5p, miR-432-5p, miR-544b, miR-187-3p, miR-377-5p, miR-26b-3p, miR-138, miR-30b-3p, miR-7862, miR-1285, miR-1434-3p, miR-194-5p, miR-145a-5p, miR-654-3p, miR-345-5p, miR-296-3p, miR-466f-3p, miR-1343-5p, miR-125a-5p, miR-34c-5p, miR-324-5p, miR-141-3p, miR-615-5p, miR-370-3p, miR-485-5p, miR-7144-5p, miR-488-3p, miR-18a, miR-362-5p, miR-500b-5p, miR-365a-5p, miR-145-3p, miR-133a-3p, miR-138-5p, miR-28-5p, miR-486b-3p, miR-204-5p, miR-410-5p, miR-135a-5p, miR-331-3p, miR-483-3p, let-7d, miR-10a-5p, miR-3578, miR-218-2-3p, miR-28b, miR-1957a, miR-4286, miR-29b-2-5p, miR-30a-3p, miR-17-3p, miR-450a-2-3p, miR-2898, let-7c-5p, miR-339a, miR-30c-2-3p, miR-3082-5p, miR-7857-3p, let-7d-5p, miR-452-3p, miR-3064-5p, miR-541-5p, miR-361-3p, miR-362-5p, miR-219a-2-3p, miR-8095, miR-541-3p, novel\_60, miR-3059-5p, miR-194b-5p, miR-4726-5p, miR-2285t, miR-9788-3p, miR-216a-3p, miR-500-5p, novel\_4, miR-409b, miR-2300a-5p, miR-151a-3p, miR-544a, miR-3120-5p, miR-10b, miR-296-5p, miR-484, miR-30b-3p, miR-30c-1-3p, miR-2330-5p, miR-424-5p, let-7a-5p, miR-3085-3p, let-7e, miR-326, miR-323-5p, miR-6130, miR-544-3p, novel\_25, novel\_32, miR-532-5p, miR-18a-5p, miR-133b-3p, miR-27b-5p, miR-10b-5p, miR-6134, let-7b-5p, miR-4510, miR-3074-2-3p, miR-664a, miR-17-3p, miR-708-5p, miR-424-5p, miR-29b-2-5p, miR-132-5p, miR-324-3p, miR-15a-5p, miR-151-5p, miR-3600, miR-378d, miR-1246, miR-2300b-3p, novel\_133, miR-1197-5p, miR-188-3p, miR-2904, miR-124-3p, miR-216c-5p, miR-760-3p, miR-21-3p, miR-34b-5p, miR-30b-3p, miR-125b, miR-185-3p, novel\_69, miR-669, miR-329-5p, miR-

miR-30b-5p, miR-382-3p, miR-769-5p, miR-219a-2-3p, novel\_60, miR-3059-5p, miR-2285f, miR-181d-5p, miR-27a-3p, miR-664b, miR-3955-3p, miR-542-5p, miR-3187-3p, miR-193a, miR-758-3p, miR-106a-5p, miR-450b-5p, miR-544a, miR-16-2-3p, miR-484, miR-143-5p, miR-142-3p, miR-409b, miR-105-1, miR-2300a-5p, miR-27a-3p, miR-222-5p, miR-664a, miR-6516-3p, miR-155-5p, miR-17-3p, miR-19b-1-5p, miR-338-5p, miR-29b-2-5p, miR-145a-3p, miR-4510, miR-1271, miR-3074-2-3p, miR-154b-3p, miR-30f, miR-544-3p, miR-6130, miR-204-3p, miR-140-5p, miR-532-5p, miR-106a, miR-760-3p, miR-30d, miR-30b-3p, miR-1277-5p, miR-299-3p, miR-542-5p, miR-216a-5p, miR-20a, miR-1246, miR-124-3p, miR-140-3p, miR-188-3p, miR-5703, miR-383-5p, miR-222-5p, miR-340-5p, miR-200b, miR-199a-3p, miR-548e-3p, novel\_1, miR-656-5p, miR-147-5p, miR-20a-5p, miR-6402, miR-133a-5p, miR-323c, novel\_120, miR-542-5p, miR-2285x, miR-17-3p, miR-107, miR-9851-3p, miR-135b-5p, miR-2285ab, miR-2387, miR-2404, miR-378b, miR-7-1-3p, miR-224-5p, miR-330-3p, miR-106a-5p, miR-17-5p, miR-136-3p, miR-296-3p, miR-130b-5p, miR-363-5p, miR-138, miR-7862, miR-1285, miR-181a-5p, miR-3071-5p, miR-432-5p, miR-544b, miR-103, miR-20b, miR-665, miR-130a-3p, miR-138-5p, miR-767-5p, miR-1-5p, miR-5100, miR-135a-1-3p, miR-135a-5p, miR-93, miR-7144-5p, miR-190a-3p, miR-503-3p, miR-17-5p, miR-374c-3p, miR-769, miR-487a-3p, miR-141-3p, miR-17-3p, miR-181b-5p, miR-200c-3p, miR-107, miR-543-5p, miR-200c, miR-490-3p, miR-3529-3p, miR-30a-3p, miR-29b-2-5p, miR-181a-2-3p, miR-411-3p, miR-105-2, miR-200b-3p, let-7a-2-3p, miR-30a-5p, miR-1271-5p, miR-214-5p, miR-7641, miR-628-3p, miR-154-3p, miR-218-5p, miR-361-3p, miR-7705, miR-2447, miR-3956-3p, miR-6527, miR-96-5p, miR-335-3p, miR-493-5p, miR-544-5p, miR-140-5p, miR-2483-3p, miR-1185-2-3p, miR-2319b, miR-2285u, miR-101-5p, miR-130b-3p, miR-109a-3p, miR-

miR-809b, miR-362-5p, miR-2285f, miR-452-5p, novel\_60, miR-3059-5p, miR-2285t, miR-2284q, miR-4726-5p, miR-3958-3p, miR-769-5p, miR-376d, miR-489, miR-3082-5p, miR-541-5p, miR-664b, miR-452-3p, miR-20a-3p, miR-877-3p, miR-129b-5p, miR-30c-1-3p, miR-376b, miR-33a-5p, miR-106a-5p, miR-424-5p, miR-3955-3p, miR-320b, miR-326, novel\_115, miR-9788-3p, miR-500-5p, miR-151a-3p, miR-409b, miR-3120-5p, miR-2426, miR-30b-3p, miR-484, miR-6529a, miR-4791, miR-10b, miR-6134, miR-10b-5p, miR-145a-3p, miR-4510, miR-487a-5p, miR-424-5p, miR-450b-3p, miR-664a, miR-6516-3p, miR-29b-2-5p, miR-204-3p, miR-6130, miR-323-5p, miR-21-3p, miR-370-5p, miR-182-5p, miR-140-5p, miR-496-3p, miR-146a-5p, miR-29b-1-5p, miR-130a-5p, miR-20a, miR-183-5p, miR-216c-5p, miR-30b-3p, miR-21-3p, miR-320d, miR-106a, miR-466i-5p, miR-616-3p, miR-199a-3p, miR-487a-3p, miR-200b, miR-15a-5p, miR-485-3p, miR-548e-3p, miR-4429, miR-140-3p, miR-5703, novel\_133, miR-326-3p, miR-211, miR-371b-3p, miR-24-3p, miR-1193, miR-656-5p, miR-203b-5p, miR-16a, miR-382-5p, miR-15a, miR-20a-5p, miR-323a-5p, miR-320b, miR-10a-5p, miR-378b, miR-9851-3p, miR-135b-5p, miR-195a-5p, miR-379-5p, miR-21c, miR-376b-3p, miR-378b, miR-18a-3p, miR-2285ab, miR-2387, miR-539-3p, miR-345-5p, miR-654-3p, miR-382, miR-363-5p, miR-130b-5p, miR-466f-3p, miR-330-3p, miR-106a-5p, miR-17-5p, miR-20b, miR-665, miR-26b-3p, miR-744-5p, miR-21-5p, miR-30b-3p, miR-219a-1-3p, miR-1285, miR-365a-5p, miR-500b-5p, miR-93, miR-31-3p, miR-204-5p, miR-767-5p, miR-331-3p, miR-135a-5p, miR-370-5p, miR-374c-3p, miR-769, miR-370-3p, miR-615-5p, miR-376c-5p, miR-1814c, miR-671-5p, miR-3154, miR-17-5p, miR-362-5p, miR-320a, miR-376b-5p, miR-376c-5p, miR-2284a, miR-1271-3p, miR-29b-2-5p, miR-30a-3p, miR-181a-2-3p, miR-2898, miR-450a-2-3p, miR-200c-3p, miR-30c-2-3p, miR-376b-3p, miR-2285af, miR-200c, miR-545-

miR-141-3p, miR-370-3p, miR-503-3p, miR-2284n, miR-34c-5p, miR-320a, miR-1814c, miR-345-5p, miR-329a, miR-103b, miR-2284v, miR-181c-3p, miR-1197-3p, miR-2433, miR-2284k, miR-592, miR-204-5p, miR-28-5p, miR-31-3p, novel\_9, miR-138-5p, miR-429-3p, miR-2285ad, miR-2284z, miR-545-5p, miR-2411-5p, miR-23b-5p, miR-2427, miR-1290, miR-196a-5p, miR-496, miR-200b-3p, miR-411-3p, miR-2385-3p, miR-30a-3p, miR-192-3p, miR-200a, miR-29a-5p, miR-1957a, miR-450b-5p, miR-200c, miR-200a-3p, miR-200c-3p, miR-17-3p, miR-320c, miR-34b, miR-2404, miR-146b-3p, miR-1306, miR-505-3p, miR-2319a, miR-146b-5p, miR-17-3p, miR-2285x, miR-449a, miR-211, miR-34c, miR-133a-5p, miR-502-5p, miR-421-5p, miR-656-5p, miR-379-3p, miR-26b-3p, miR-187-3p, miR-31-5p, miR-149-5p, novel\_116, miR-3431, miR-3535, miR-2284d, miR-1843b-5p, miR-138, miR-2284ab, miR-628-5p, miR-382, miR-6240, miR-345-5p, miR-503-3p, miR-296-3p, miR-330-3p, miR-190a, miR-146a, miR-296-3p, miR-466f-3p, miR-196b-5p, miR-296-3p, miR-532-5p, miR-496-3p, miR-221-5p, miR-139-5p, miR-411, novel\_99, miR-186-5p, miR-345-5p, miR-3074-2-3p, miR-145a-3p, miR-6134, miR-30a-3p, miR-708-5p, miR-190a-5p, miR-6516-3p, miR-17-3p, miR-505-3p, miR-340-5p, miR-200b, miR-140-3p, miR-362-3p, miR-376a-5p, miR-34a-5p, miR-218-1-3p, miR-4429, miR-493-3p, miR-369-3p, miR-216c-5p, miR-2411, miR-146a-5p, miR-421-5p, miR-618, miR-2484, miR-34b-5p, miR-221-5p, miR-466i-5p, miR-320d, miR-2284m, miR-211-5p, miR-2285u, miR-20a-3p, miR-139-5p, miR-7857-3p, miR-335-3p, miR-181a-3p, miR-452-5p, miR-2284j, miR-190b-5p, miR-3059-5p, miR-371a-5p, miR-2285y, miR-101-3p, miR-2285n, miR-3968, miR-330-3p, miR-1343-3p, miR-455-3p, miR-147a, miR-329-3p, miR-2284aa, miR-101c, miR-362-3p, miR-744-3p, miR-652-5p, miR-382-3p, miR-494-3p, miR-2310, miR-3187-3p, miR-362-3p, miR-1306-5p, miR-320b, miR-146b, miR-3055-3p, miR-28-5p, miR-708-5p, novel\_44, miR-125b-5p, miR-132-5p, miR-324-3p, miR-4492, miR-10b-5p, novel\_44, miR-6134, miR-199b-5p, miR-199b-5p, miR-18a-3p, miR-485-5p, miR-874-3p, miR-370-3p, miR-1271, miR-10a-5p, miR-125a, miR-10a, miR-323a-5p, miR-323-5p, miR-199a-5p, miR-6535, miR-324-3p, miR-125b, miR-760-3p, miR-199b-5p, miR-125a-5p, miR-1343-5p, miR-543-5p, novel\_127, miR-1388-3p, miR-628-5p, miR-199a-5p, miR-1271-3p, miR-873a-5p, miR-1843b-5p, miR-10b, miR-1343-5p, miR-1193, miR-378d, miR-10a-5p, miR-18a-3p, miR-6517, miR-2320-3p, miR-214-5p

miR-320b, miR-224-5p, miR-455-5p, miR-483-3p, miR-193a-3p, miR-1839-3p, miR-744-3p, miR-193a, miR-19b-2-5p, miR-197-3p, miR-29b, miR-219a-1-3p, miR-21b, miR-455-5p, miR-181b-2-3p, miR-142-3p, miR-3968, miR-29a, miR-22-5p, miR-147-5p, miR-154-3p, miR-193b-3p, miR-1839-3p, miR-29c-3p, miR-452-5p, miR-877-3p, miR-409-5p, miR-18a-3p, miR-3963, miR-378b, miR-329-5p, miR-3120-3p, miR-29a-3p, miR-320c, miR-677, miR-181b-3p, miR-2285af, miR-2285p, miR-320d, miR-30d, novel\_127, miR-2484, miR-329a-5p, miR-487a, miR-148b-5p, miR-142a-3p, miR-130a-5p, miR-125b-2-3p, miR-3065-3p, miR-2432, miR-29a-5p, miR-29d-3p, miR-30a-5p, miR-4429, miR-664-5p, miR-378d, miR-496, miR-18a-3p, miR-483-3p, novel\_121, miR-29b-3p, miR-19b-1-5p, miR-592, miR-1306-5p, miR-145a-3p, miR-224-5p, miR-145-3p, miR-21a-3p, miR-30e-5p, miR-320a, miR-30d-5p, miR-154b-3p, miR-671-5p, miR-487a-3p, miR-874-3p, miR-496-3p, miR-2285aa, miR-3065-3p, miR-193b-3p, miR-877-5p, miR-154b-5p, novel\_87, miR-502-5p, miR-28c, miR-22-5p, miR-62b-3p, miR-6123, miR-147-5p, miR-92a-3p, miR-206, novel\_1, novel\_27, miR-326-3p, miR-1306, miR-376b-3p, miR-18a-3p, miR-2285ab, miR-148a-3p, miR-3120-3p, miR-677, miR-181b-3p, miR-32, miR-7-5p, miR-126a-3p, miR-539-3p, let-7j, miR-2285r, miR-1285, miR-7b-5p, miR-1434-3p, miR-744-5p, miR-27b-3p, miR-2284x, miR-2284ab, miR-339-5p, novel\_116, miR-544b, miR-2284d, miR-100-3p, miR-6740-5p, miR-99b-3p, miR-486b-3p, miR-592, novel\_9, miR-133a-3p, miR-488-3p, miR-10b-3p, miR-10a-3p, miR-2318, miR-99a-3p, miR-542-5p, miR-133c, miR-25-3p, miR-3071-3p, miR-30c-2-3p, miR-339a, miR-205-5p, miR-376b-3p, miR-219-3p, miR-92a-3p, novel\_127, miR-152-3p, miR-2898, miR-450a-2-3p, miR-1, miR-29b-2-5p, miR-29a-5p, miR-490-3p, miR-1271-3p, miR-92b-3p, miR-28b, miR-330-5p, miR-3578, miR-1290, novel\_79, miR-9-5p, miR-301a-5p, novel\_82, miR-2285f, miR-9-5p, miR-363-3p, miR-219a-2-3p, miR-140-5p, miR-376a-3p, miR-877-3p, miR-299b-5p, miR-374b-5p, miR-452-3p, miR-20a-3p, miR-203-3p, miR-27a-3p, miR-376d, miR-499a-3p, miR-29b-1-5p, miR-1306-5p, miR-5126, miR-326, miR-214-3p, miR-494-3p, miR-30c-1-3p, miR-1a-3p, miR-301b-5p, miR-544a, miR-5010-3p, miR-181b-2-3p, miR-27a-3p, novel\_78, miR-548w, miR-2459, miR-376b-3p, miR-219b-3p, miR-29b-2-5p, let-7b-3p, miR-500, miR-4492, miR-6516-3p, miR-214, miR-539-5p, miR-98-3p, miR-206-3p, miR-500a-3p, miR-433-3p, novel\_99, miR-133b-3p, miR-2312, miR-339b, miR-30c-1-3p, miR-140-5p, miR-32-5p, miR-544-3p, miR-499b-3p, miR-324-3p, miR-500a-5p, miR-26a-5p, miR-374a-5p, miR-2484, miR-202-5p, miR-2284m, miR-99a-3p, miR-10a-3p, miR-216c-5p, miR-329a-5p, miR-486-3p, miR-29b-1-5p, miR-181b-1-3p, miR-98-3p, miR-2904, miR-1434-5p, miR-1246, miR-3600, miR-485-3p, miR-18a-3p, miR-548a-3p, miR-487a-3p, miR-785a, miR-340-5p, miR-148b-

DENND2D ENSOARGOC DENN/MAD

GRAMD1C ENSOARGOC GRAM dom

miR-107, miR-450b-3p, miR-195a-5p, miR-135b-5p, let-7e-5p, miR-2285ab, miR-216a-3p, miR-21c, miR-1306, novel\_69, miR-2404, miR-320c, miR-144-3p, miR-6535, miR-3074-5p, novel\_68, miR-147-5p, miR-576-3p, miR-15a, miR-502-5p, let-7i, miR-425-5p, miR-16a, miR-371b-3p, miR-2428, miR-199b-5p, miR-326-3p, miR-219b-3p, novel\_101, miR-758-5p, miR-1193, miR-16-1-3p, miR-219a-1-3p, miR-125b-1-3p, miR-16b, miR-138, miR-30b-3p, miR-497-5p, miR-432, novel\_23, miR-145a-5p, miR-450c-3p, miR-185-5p, miR-134-3p, miR-3431, let-7g-5p, miR-432-5p, miR-103, miR-194-3p, miR-103a-3p, miR-26b-3p, miR-125a-5p, miR-296-3p, miR-2411-3p, miR-365b-5p, miR-197-5p, miR-654-3p, miR-503-3p, miR-296-3p, miR-380-5p, miR-10b-3p, miR-23a-5p, miR-2448-3p, miR-488-3p, miR-381-3p, miR-320a, miR-374c-3p, miR-154b-5p, miR-199a-5p, miR-574-5p, miR-125a, miR-2285aa, miR-138-5p, miR-370-5p, miR-5100, miR-410-5p, miR-135a-5p, miR-144, miR-125b-5p, miR-100-3p, miR-365a-5p, miR-1306-5p, miR-16-5p, miR-300, let-7d, miR-128-3p, miR-345-3p, miR-330-5p, miR-23b-5p, miR-322-5p, miR-129-1-3p, miR-450a-1-3p, miR-2285ad, miR-412, let-7f-5p, miR-107, miR-2285af, let-7c-5p, miR-30c-2-3p, miR-380-5p, miR-192-3p, miR-490-3p, let-7g, novel\_39, miR-199a-5p, miR-1957a, miR-181a-2-3p, miR-30a-3p, miR-3064-5p, miR-504, miR-877-3p, miR-199b-5p, miR-140-5p, miR-2483-3p, miR-378g, miR-25, let-7d-5p, miR-20a-3p, miR-3064-5p, miR-2285u, miR-541-5p, miR-3968, miR-2284q, miR-2285t, miR-2440, miR-2285n, miR-107-5p, miR-2285y, miR-8095, miR-541-3p, miR-2447, miR-3059-5p, miR-2285f, miR-3120-5p, miR-541, miR-296-5p, miR-30b-3p, miR-412-3p, miR-153, miR-455-3p, miR-9788-3p, novel\_4, miR-145b, miR-3085-3p, miR-103a-2-5p, let-7e, miR-214-3p, miR-199b-5p, miR-153-3p, miR-326, miR-1306-5p, miR-320b, miR-16b, miR-30c-1-3p, miR-382-3p, miR-124-5p, let-7a-5p, miR-652-5p, miR-625-5p, miR-18b, miR-211-5p, miR-3120-3p, miR-139-5p, miR-10b, miR-769-5p, miR-490-5p, miR-656-5p, miR-2284q, miR-3958-3p, miR-9-5p, novel\_101, miR-211, miR-22-3p, miR-30b-3p, miR-296-5p, miR-2284r, miR-2284aa, miR-2889, miR-7862, miR-30b-3p, miR-2426, miR-31-5p, miR-1343-3p, miR-9788-3p, miR-455-3p, miR-425-3p, miR-296-3p, miR-363-5p, miR-296-3p, miR-2285r, miR-432-3p, miR-129b-3p, miR-18a, miR-488-3p, novel\_99, miR-1827, miR-18a-5p, miR-874-3p, miR-22-3p, miR-769, miR-139-5p, miR-331-3p, miR-665, miR-204-5p, miR-145a-3p, miR-145-3p, miR-769-5p, miR-346, miR-2904, miR-5703, miR-2366, miR-3578, miR-493-3p, miR-18b-5p, miR-6517, miR-2284z, miR-532-3p, miR-9-5p, miR-2285af, miR-2898, miR-2403, miR-4286, miR-130a-5p

miR-125a, miR-25-3p, miR-374c-3p, miR-301, miR-671-5p, miR-376c-5p, miR-10b-3p, miR-144-5p, miR-1197-3p, miR-1260b, miR-409-3p, miR-125b-5p, miR-592, miR-429-3p, miR-299a-3p, miR-214-5p, miR-2284z, miR-450a-1-3p, miR-2411-5p, miR-24-2-5p, miR-218-2-3p, miR-1290, miR-200b-3p, miR-155-5p, miR-582-3p, miR-29b-2-5p, miR-3064-5p, miR-490-3p, miR-92b-3p, miR-217, miR-200c, miR-1260a, novel\_96, miR-92a-3p, miR-127-5p, miR-200c-3p, miR-17-3p, miR-2898, miR-374c-3p, miR-299b-3p, miR-376b-5p, miR-2285ab, miR-6516-3p, miR-2319a, miR-450b-3p, miR-17-3p, novel\_27, miR-576-3p, miR-4324, miR-625-3p, miR-206, miR-92a-3p, miR-31-5p, miR-2355-3p, novel\_116, miR-3431, miR-374b-3p, miR-3071-5p, miR-145a-5p, miR-450c-3p, miR-1260b, miR-493-5p, miR-32, miR-125a-5p, miR-140-5p, miR-32-5p, miR-504-5p, miR-155-5p, miR-204-3p, miR-129b-3p, miR-450a-1-3p, miR-1827, miR-3074-2-3p, miR-214, miR-6134, miR-206-3p, miR-6525, miR-338-5p, miR-29b-2-5p, miR-30a-3p, miR-6516-3p, miR-17-3p, miR-155-5p, miR-450b-3p, miR-532-3p, miR-2284h-5p, miR-200b, miR-217-5p, miR-376a-5p, miR-378d, miR-2285w, miR-2432, miR-2411, miR-125b-2-3p, miR-376a-5p, miR-29b-1-5p, miR-125b, miR-216a-5p, miR-210-5p, novel\_17, miR-299-3p, miR-30b-3p, miR-20a-3p, miR-3064-5p, miR-144-5p, miR-25, miR-140-5p, miR-877-3p, miR-493-5p, miR-504, miR-668-5p, miR-2285f, miR-2447, miR-218-5p, miR-4726-5p, miR-145b, miR-5010-3p, novel\_4, miR-2459, miR-758-3p, miR-1a-3p, miR-3120-5p, miR-33a-5p, miR-758-3p, miR-491-3p, miR-29b-1-5p, miR-214-3p, miR-3085-3p, miR-1185-5p, miR-491-5p, miR-655-5p, miR-139-5p, miR-20a-3p, miR-6535, miR-146b-3p, miR-135b-5p, miR-1291, miR-136-5p, miR-504, miR-1193, miR-541-3p, miR-24-3p, miR-769-5p, novel\_82, miR-218-5p, miR-28c, miR-6529b, miR-2285t, miR-3955-5p, novel\_4, miR-455-3p, miR-9788-3p, miR-450c-3p, miR-758-3p, miR-329-3p, miR-2113, miR-223-3p, miR-541, miR-2284x, miR-362-3p, miR-1260b, miR-16-1-3p, miR-363-5p, miR-33a-5p, miR-8485, miR-758-3p, miR-2310, miR-30c-1-3p, miR-362-3p, miR-2331-5p, miR-125a-5p, miR-1343-5p, miR-1468, miR-483-3p, miR-491-5p, miR-3955-3p, miR-2355-5p, miR-370-5p, miR-296-3p, miR-125a, miR-30c-1-3p, miR-2331-3p, miR-504-5p, miR-3068-3p, miR-139-5p, miR-769, miR-6130, miR-503-3p, miR-450a-1-3p, miR-1827, miR-186-5p, miR-1814c, miR-329a, miR-4510, miR-6134, miR-6525, miR-769-5p, miR-1260b, miR-132-5p, miR-331-3p, miR-125b-5p, miR-135a-5p, miR-2433, miR-370-5p, miR-1468-5p, miR-450b-3p, miR-450a-1-3p, miR-214-5p, miR-210-3p, miR-483-3p, miR-758-5p, miR-1343-5p, miR-2904, miR-5703, miR-362-3p, miR-2300b-3p, miR-133a-3p, miR-16-1-3p, miR-216c-5p, miR-1957a, miR-2285b, miR-28b, miR-216a-5p, miR-30c-2-3p, miR-92a-1-5p, miR-125b, miR-1260a, miR-210-5p, novel\_96, miR-760-3p

TRAV27 ENSOARGOCT cell r

SLC11A1 ENSOARGOC solute c



miR-1291, miR-670-3p, miR-29a-3p, miR-34b, miR-2404, miR-378b, miR-10a-5p, miR-656-5p, miR-22-5p, miR-203b-5p, miR-133a-5p, miR-34c, miR-24-3p, miR-211, miR-449a, miR-326-3p, miR-342-3p, miR-1193, miR-495-3p, miR-219a-1-3p, miR-29b, miR-30b-3p, miR-380-3p, miR-1285, miR-1434-3p, miR-185-5p, miR-2285g, miR-2355-3p, miR-133b-5p, miR-26b-3p, miR-125a-5p, miR-1343-5p, miR-130b-5p, miR-363-5p, let-7g-3p, miR-671-5p, miR-485-5p, miR-7144-5p, miR-3154, miR-34c-5p, miR-154b-5p, miR-324-5p, miR-204-5p, miR-370-5p, miR-29b-3p, miR-331-3p, miR-365a-5p, miR-6128, miR-10a-5p, let-7a-2-3p, miR-105-2, miR-200b-3p, miR-128-3p, miR-134, miR-30a-5p, miR-29d-3p, miR-582-3p, miR-200c-3p, miR-200c, miR-30c-2-3p, miR-2478, miR-1957a, miR-147-3p, miR-877-3p, miR-129b-5p, miR-27a-3p, miR-20a-3p, miR-4726-5p, miR-382-3p, miR-30b-5p, miR-2285n, miR-219a-2-3p, miR-452-5p, miR-2426, miR-3120-5p, miR-16-2-3p, miR-10b, miR-484, miR-6529a, miR-30b-3p, miR-142-3p, miR-2285e, miR-216a-3p, miR-105-1, miR-27a-3p, miR-326, miR-342, miR-30c-1-3p, miR-758-3p, miR-376b, miR-33a-5p, miR-30f, let-7g-3p, miR-21a-3p, miR-27b-5p, miR-6130, miR-139-5p, miR-155-5p, miR-22-3p, miR-370-5p, miR-6516-3p, miR-155-5p, miR-450b-3p, miR-487a-5p, miR-320e, miR-10b-5p, miR-6134, miR-4510, miR-539-5p, miR-140-3p, miR-124-3p, miR-200b, novel\_83, miR-548e-3p, miR-466i-5p, miR-760-3p, miR-299-3p, miR-21-3p, miR-30d, miR-34b-5p, miR-196a-3p, miR-125b, miR-216a-3p, miR-299b-3p, novel\_69, miR-181b-3p, miR-677, miR-669, miR-329-5p, miR-3120-3p, miR-26b-5p, miR-29a, miR-6123, miR-421-5p, miR-4324, novel\_87, miR-29c-3p, miR-2284x, miR-27b-3p, miR-2113, miR-1843b-5p, miR-7b-5p, miR-450c-3p, miR-22-3p, miR-197-3p, miR-3431, miR-134-3p, miR-3535, miR-31-5p, miR-340-3p, miR-3955-5p, miR-7-5p, novel\_51, miR-365b-5p, miR-105-5p, miR-432-3p, let-7a-2-3p, miR-502-5p, miR-4324, let-7i, miR-628-3p, miR-3964, miR-1839-3p, miR-2285f, miR-452-5p, miR-1307-3p, miR-2285ab, miR-378b, miR-450b-3p, let-7e-5p, miR-6395, novel\_68, miR-664b, miR-2483-3p, miR-203-3p, let-7d-5p, miR-1185-2-3p, miR-365b-5p, let-7e, miR-124a, miR-130b-5p, let-7a-5p, miR-1839-3p, miR-382, let-7c-3p, let-7f-2-3p, let-7f-2-3p, miR-2113, miR-197-3p, miR-7857, miR-125b-2-3p, miR-145a-5p, miR-101a-5p, miR-133b-5p, miR-26b-3p, miR-145b, miR-2285g, let-7g-5p, miR-455-3p, miR-1185-3p, miR-2285e, let-7f, miR-410-3p, miR-487a-5p, miR-130b-5p, miR-539-5p, let-7b, miR-1306-5p, miR-129-2-3p, miR-4510, miR-122-5p, miR-365a-5p, let-7b-5p, miR-2285c, let-7g-3p, miR-2312, miR-3074-1-3p, novel\_99, miR-545-3p, miR-552-3p, miR-532-5p, miR-6130, miR-216b-5p, novel\_25, let-7i-5p, miR-125a-3p, miR-664-3p, miR-30f, miR-324-3p, miR-3071-3p, let-7c-5p, miR-98-5p, let-7f-5p, let-7k, miR-195a-3p, miR-369-3p, let-7g, miR-1961, miR-124-3p, miR-188-3p, miR-1434-5p, let-7d, miR-218-1-3p, miR-361-5p, miR-505-5p, miR-532-3p, miR-328-3p, miR-129-1-3p

miR-302a-5p, miR-383-5p, miR-380-5p, miR-361-5p, miR-155-5p, novel\_73, miR-1193, miR-140-3p, miR-188-3p, miR-29a-5p, miR-380-5p, miR-4286, miR-487a, miR-329a-5p, miR-21-3p, miR-181b-5p, miR-17-3p, miR-26a-5p, miR-2285p, miR-664-3p, miR-155-5p, miR-154a-3p, miR-487a-3p, miR-543-3p, miR-376c-5p, miR-154b-3p, miR-2448-3p, miR-488-3p, miR-181c-5p, miR-1197-3p, miR-155-5p, miR-17-3p, miR-6516-3p, miR-338-5p, miR-320e, miR-144, miR-5100, miR-9788-3p, miR-2300a-5p, miR-450b-5p, miR-30b-3p, miR-194-5p, miR-30b-3p, miR-181a-5p, miR-6529a, miR-8485, miR-432-3p, miR-380-5p, miR-194a, novel\_103, miR-203-3p, miR-144-3p, miR-26b-5p, miR-329-5p, miR-664b, miR-129b-5p, miR-17-3p, miR-194b-5p, miR-758-5p, miR-181d-5p, miR-154-3p, miR-3958-3p, miR-499a-5p, miR-6402, miR-133a-5p, miR-1307-3p, miR-449a, miR-326-3p, miR-147-5p, miR-22-5p, miR-20a-5p, let-7i, miR-34c, miR-34b, miR-299b-3p, miR-146b-3p, miR-323a-5p, miR-6535, miR-378b, miR-1291, miR-6395, miR-378f, let-7e-5p, miR-9851-3p, miR-2387, miR-1306, miR-345-5p, miR-466f-3p, miR-660, miR-503-5p, novel\_51, miR-106a-5p, miR-17-5p, let-7g-5p, miR-503-5p, miR-2285g, miR-2355-3p, miR-20b, novel\_116, miR-377-5p, miR-16-1-3p, miR-219a-1-3p, miR-1260b, miR-30b-3p, miR-138, miR-2889, miR-4508, miR-22-3p, miR-1260b, miR-93, miR-378c, let-7e-3p, miR-138-5p, miR-486b-3p, miR-3969, miR-331-3p, miR-6740-5p, miR-34c-5p, miR-300-3p, miR-615-5p, miR-1271, miR-2355-5p, miR-370-3p, miR-345-5p, miR-7144-5p, miR-20b-5p, miR-17-5p, miR-93-5p, let-7g, miR-4286, miR-30a-3p, let-7f-5p, novel\_96, miR-1260a, let-7c-5p, miR-30c-2-3p, miR-378h, miR-1271-5p, miR-129-1-3p, miR-299a-3p, miR-412, let-7d, miR-615-3p, miR-330-5p, miR-361-3p, miR-423-5p, miR-541-3p, miR-3956-3p, miR-2447, novel\_60, miR-4726-5p, miR-615, miR-371a-5p, miR-489, miR-378e, miR-3596, miR-4443, let-7d-5p, miR-652-3p, miR-452-3p, miR-4792, miR-96-5p, miR-877-3p, miR-361-3p, miR-378j, miR-378d, miR-30c-1-3p, miR-193a, miR-8485, miR-106a-5p, miR-494-3p, let-7a-5p, miR-124a, miR-25-5p, miR-491-5p, let-7e, miR-1468, miR-5126, miR-1306-5p, miR-326, miR-106b-5p, miR-421, miR-2285e, novel\_4, miR-2300a-5p, miR-1343-3p, miR-544a, miR-378c, miR-541, miR-378b, miR-296-5p, miR-30b-3p, miR-125b-2-3p, miR-412-3p, miR-6134, let-7b-5p, miR-3184-5p, miR-145a-3p, miR-129-2-3p, miR-378c, let-7b, miR-665-5p, miR-3074-2-3p, miR-1271, miR-451a, miR-664a, miR-1468-5p, miR-30e-3p, let-7f, miR-132-5p, miR-30a-3p, miR-323-5p, miR-544-3p, let-7i-5p, novel\_32, miR-22-3p, miR-204-3p, miR-660-5p, miR-378a-3p, miR-30c-1-3p, miR-221-5p, miR-552-3p, miR-296-3p, miR-345-5p, miR-625-5p, miR-2285c, miR-4443, miR-2355-3p, miR-22-3p, novel\_42, miR-532-5p, miR-370-3p, miR-1224-5p, miR-1895, miR-4508, miR-296-5p, miR-378j, miR-185-3p, miR-22-3p

|        |                    |                                                                                                                                                                                                                                                                                                                                                                                                                                                                                                                                                                                                                                                                                                                                                                                                                                                                                                                                                                                                                                                                                                                                                                                                                                                                                                                                                                                                                                                                                                                                                                                                                                                                       |
|--------|--------------------|-----------------------------------------------------------------------------------------------------------------------------------------------------------------------------------------------------------------------------------------------------------------------------------------------------------------------------------------------------------------------------------------------------------------------------------------------------------------------------------------------------------------------------------------------------------------------------------------------------------------------------------------------------------------------------------------------------------------------------------------------------------------------------------------------------------------------------------------------------------------------------------------------------------------------------------------------------------------------------------------------------------------------------------------------------------------------------------------------------------------------------------------------------------------------------------------------------------------------------------------------------------------------------------------------------------------------------------------------------------------------------------------------------------------------------------------------------------------------------------------------------------------------------------------------------------------------------------------------------------------------------------------------------------------------|
| TMIGD3 | ENSOARGO( transmem | <p>miR-3071-3p, miR-500a-5p, miR-345-3p, miR-182-5p, miR-422a, miR-2411-3p, miR-210-5p, miR-200c, miR-1306-5p, miR-200c-3p, miR-33a-5p, novel_39, miR-2424, miR-378d, miR-2478, miR-377-5p, miR-29d-3p, miR-378a-3p, miR-188-3p, miR-23b-5p, miR-345-3p, miR-484, miR-378i, miR-378b, miR-200b-3p, miR-128-3p, miR-1388-5p, miR-29b, miR-378c, miR-142-3p, miR-5010-3p, miR-377-5p, miR-2285ad, miR-6517, miR-429-3p, miR-2284h-5p, miR-421, miR-505-5p, miR-378h, miR-200b, miR-100-3p, miR-331-3p, miR-2285y, miR-2285n, miR-29b-3p, miR-874-5p, miR-29a, miR-29c-3p, miR-2447, miR-378c, miR-378c, miR-1306, miR-216a-3p, miR-378f, miR-671-5p, miR-136-5p, miR-182-5p, miR-378a-3p, miR-20a-3p, miR-204-3p, miR-378e, miR-29a-3p, miR-181c-5p, miR-206-3p, miR-539-5p, miR-190a-5p, miR-208b-5p, miR-130b-5p, miR-450b-3p, miR-219b-3p, miR-369-5p, miR-3604, miR-22-3p, novel_32, miR-204-3p, miR-6516, miR-2284s, miR-139-5p, miR-370-5p, miR-216b-3p, miR-504-5p, miR-221-5p, miR-543-3p, miR-450a-1-3p, miR-2432, miR-143-3p, miR-376a-5p, miR-130a-5p, miR-181b-1-3p, miR-329a-5p, miR-216c-5p, miR-3653-3p, miR-221-5p, miR-2284m, miR-320d, miR-760-3p, miR-466i-5p, miR-324-3p, miR-2285p, miR-199a-3p, miR-671-3p, miR-328-3p, miR-222-5p, miR-340-5p, miR-200b, miR-505-3p, miR-18a-3p, miR-148a-5p, miR-2284u, novel_73, miR-33b-3p, miR-4429, miR-188-3p, miR-1246, miR-2366, miR-376a-5p, miR-193b-5p, miR-7705, miR-219a-2-3p, novel_111, miR-190b-5p, miR-452-5p, miR-9-5p, miR-181d-5p, miR-3059-5p, miR-2447, miR-2285t, miR-490-5p, miR-335, miR-371a-5p, miR-218-5p, miR-382-3p, miR-3596, miR-7857-3p, miR-3082-5p, miR-499b-5p, miR-211-</p> |
| TOX4   | ENSOARGO( TOX high | <p>5p, miR-139-5p, miR-4792, miR-664b, miR-2284g, miR-335-3p, miR-504, miR-668-5p, miR-378j, miR-361-3p, miR-199b-5p, let-7c-3p, miR-2284b, miR-382-3p, miR-199b-5p, miR-491-5p, miR-487b-5p, miR-3955-3p, miR-323b-3p, miR-2957, miR-320b, miR-199a-3p, novel_103, miR-326, miR-431-5p, miR-455-3p, miR-148b-5p, miR-126a-5p, miR-2459, miR-147a, miR-539-5p, miR-1298-3p, miR-181b-2-3p, miR-548w, miR-101c, miR-1839-5p, miR-3120-5p, miR-450b-5p, miR-101a-5p, miR-323b, miR-412-3p, miR-125b-2-3p, miR-484, miR-1298-5p, miR-1260b, miR-3607-3p, miR-103b, miR-1306-5p, miR-3432a, miR-204-5p, miR-331-3p, miR-3969, miR-409-3p, miR-135a-5p, miR-34c-3p, miR-410-5p, miR-370-5p, miR-199a-5p, miR-3957, miR-331-5p, miR-2355-5p, miR-2285aa, miR-141-3p, miR-3957-5p, miR-574-5p, miR-7144-5p, miR-876-3p, let-7g-3p, miR-200a-5p, miR-320a, miR-3154, miR-488-3p, miR-2448-3p, miR-2284y, miR-199a-5p, miR-2284a, miR-148b-5p, miR-380-5p, miR-2478, miR-107, novel_96, miR-200a-</p>                                                                                                                                                                                                                                                                                                                                                                                                                                                                                                                                                                                                                                                                          |

|       |                    |                                                                                                                                                                                                                                                                                                                                                                                                                                                                                                                                                                                                                                                                                                                                                                                                                                                                                                                                                                                                                                                                                                                                                                                                                                                                                                                                                                                                                                                                                                                                                                                                                                                                                                                                                                                                                                                                                                                                                                                                                                                                                                                                                                                                                                                                                                                                                                                                                                                                                                                                                                                                                                        |
|-------|--------------------|----------------------------------------------------------------------------------------------------------------------------------------------------------------------------------------------------------------------------------------------------------------------------------------------------------------------------------------------------------------------------------------------------------------------------------------------------------------------------------------------------------------------------------------------------------------------------------------------------------------------------------------------------------------------------------------------------------------------------------------------------------------------------------------------------------------------------------------------------------------------------------------------------------------------------------------------------------------------------------------------------------------------------------------------------------------------------------------------------------------------------------------------------------------------------------------------------------------------------------------------------------------------------------------------------------------------------------------------------------------------------------------------------------------------------------------------------------------------------------------------------------------------------------------------------------------------------------------------------------------------------------------------------------------------------------------------------------------------------------------------------------------------------------------------------------------------------------------------------------------------------------------------------------------------------------------------------------------------------------------------------------------------------------------------------------------------------------------------------------------------------------------------------------------------------------------------------------------------------------------------------------------------------------------------------------------------------------------------------------------------------------------------------------------------------------------------------------------------------------------------------------------------------------------------------------------------------------------------------------------------------------------|
| LSAMP | ENSOARGOC limbic s | <p>miR-3591-3p, miR-216a-3p, miR-7144-5p, novel_99, miR-21-3p, miR-3065-3p, miR-452-3p, miR-378b, novel_25, miR-6130, miR-502-5p, miR-2285j, miR-2284k, miR-487a-5p, miR-4492, miR-490-5p, miR-6128, miR-3957-3p, miR-6527, miR-2330-3p, miR-4510, miR-212-3p, miR-2284v, miR-338-3p, miR-361-3p, miR-1260b, miR-30b-3p, novel_133, miR-1246, miR-2300b-3p, miR-128-3p, miR-30b-3p, miR-2284ab, miR-125b-1-3p, miR-101a-5p, miR-1260b, miR-31-5p, miR-532-3p, miR-216a-3p, miR-2284d, miR-210-3p, miR-2411-5p, miR-185-5p, miR-185-3p, miR-1260a, miR-205-5p, novel_17, miR-2284m, miR-2898, miR-760-3p, miR-466i-5p, miR-363-5p, miR-101-5p, miR-376b, miR-183-5p, miR-193a, miR-2411, miR-3065-3p, miR-2284l, miR-370-3p, miR-374c-3p, miR-2284n, miR-154b-5p, miR-199a-5p, miR-488-3p, miR-3154, miR-320a, miR-1814c, miR-671-5p, miR-485-5p, miR-7144-5p, miR-23a-5p, miR-103b, miR-6128, miR-365a-5p, miR-410-5p, miR-551b-3p, miR-29b-3p, miR-3969, miR-331-3p, miR-26c, miR-138-5p, miR-28-5p, miR-376a-5p, miR-7641, miR-483-3p, miR-6516-5p, miR-615-3p, miR-218-2-3p, miR-29d-3p, miR-582-3p, let-7d, miR-10a-5p, miR-105-2, miR-200b-3p, miR-4286, miR-30a-3p, miR-29b-2-5p, miR-2284a, miR-199a-5p, miR-376c-5p, miR-376b-5p, miR-3065-3p, miR-200c, miR-1260a, let-7c-5p, miR-339a, miR-30c-2-3p, miR-200c-3p, miR-17-3p, miR-2898, miR-107, miR-10a-5p, miR-320b, miR-670-3p, miR-29a-3p, miR-378b, miR-18a-3p, miR-107, miR-450b-3p, miR-376a-2-5p, miR-342-3p, miR-17-3p, miR-24-3p, miR-371b-3p, miR-326-3p, let-7i, novel_1, miR-502b, miR-22-5p, miR-185-5p, let-7g-5p, miR-2284d, miR-103, miR-1285, miR-873a-5p, miR-374b-3p, miR-145a-5p, miR-1260b, miR-29b, miR-138, miR-30b-3p, miR-2284ab, miR-345-5p, miR-136-3p, miR-452-5p, miR-1343-5p, miR-140-5p, miR-182-5p, miR-532-5p, miR-3065-3p, miR-6130, miR-193b-3p, miR-139-5p, miR-6516, miR-27a-5p, miR-204-3p, novel_32, miR-22-3p, miR-21a-3p, miR-4510, miR-539-5p, miR-3074-2-3p, miR-10b-5p, miR-338-3p, let-7b-5p, miR-320e, miR-29b-2-5p, miR-324-3p, miR-132-5p, miR-664a, miR-17-3p, miR-487a-5p, miR-208b-5p, miR-708-5p, miR-3600, miR-148b-3p, miR-200b, miR-383-5p, novel_83, miR-2300b-3p, miR-1197-5p, miR-5703, miR-1193, miR-2904, miR-4429, miR-216c-5p, miR-130a-5p, miR-2432, miR-146a-5p, miR-412-5p, miR-320d, miR-2284m, miR-299-3p, miR-21-3p, miR-452-3p, miR-7977, miR-541-5p, miR-489, miR-7857-3p, miR-27a-3p, let-7d-5p, miR-199b-5p, novel_94, miR-3059-5p, miR-107-5p, miR-450a-5p, miR-3958-3p, miR-105-1, novel_4, miR-27a-3p, miR-143-5p, miR-10b, miR-6529a, miR-184, miR-296-5p, miR-30b-3p, miR-3120-5p, miR-382-</p> |
| BCS1L | ENSOARGOC BC1 (ubi | <p>3p, miR-145a-5p, miR-1260b, miR-29b, miR-138, miR-30b-3p, miR-2284ab, miR-345-5p, miR-136-3p, miR-452-5p, miR-1343-5p, miR-140-5p, miR-182-5p, miR-532-5p, miR-3065-3p, miR-6130, miR-193b-3p, miR-139-5p, miR-6516, miR-27a-5p, miR-204-3p, novel_32, miR-22-3p, miR-21a-3p, miR-4510, miR-539-5p, miR-3074-2-3p, miR-10b-5p, miR-338-3p, let-7b-5p, miR-320e, miR-29b-2-5p, miR-324-3p, miR-132-5p, miR-664a, miR-17-3p, miR-487a-5p, miR-208b-5p, miR-708-5p, miR-3600, miR-148b-3p, miR-200b, miR-383-5p, novel_83, miR-2300b-3p, miR-1197-5p, miR-5703, miR-1193, miR-2904, miR-4429, miR-216c-5p, miR-130a-5p, miR-2432, miR-146a-5p, miR-412-5p, miR-320d, miR-2284m, miR-299-3p, miR-21-3p, miR-452-3p, miR-7977, miR-541-5p, miR-489, miR-7857-3p, miR-27a-3p, let-7d-5p, miR-199b-5p, novel_94, miR-3059-5p, miR-107-5p, miR-450a-5p, miR-3958-3p, miR-105-1, novel_4, miR-27a-3p, miR-143-5p, miR-10b, miR-6529a, miR-184, miR-296-5p, miR-30b-3p, miR-3120-5p, miR-382-</p>                                                                                                                                                                                                                                                                                                                                                                                                                                                                                                                                                                                                                                                                                                                                                                                                                                                                                                                                                                                                                                                                                                                                                                                                                                                                                                                                                                                                                                                                                                                                                                                                                                             |

miR-218-1-3p, miR-133a-3p, novel\_73, miR-1197-5p, miR-1193, miR-5703, miR-2366, miR-362-3p, miR-328-3p, miR-212-5p, miR-18a-3p, miR-3960, miR-185-3p, miR-92a-1-5p, miR-324-3p, miR-210-5p, miR-26a-5p, miR-345-3p, miR-186-5p, miR-625-5p, miR-1895, miR-133b-3p, miR-129b-3p, miR-155-5p, novel\_32, miR-22-3p, novel\_25, miR-323-5p, miR-193b-3p, miR-341-3p, miR-21-3p, miR-3065-3p, miR-140-5p, miR-32-5p, miR-708-5p, miR-874-5p, miR-155-5p, miR-3604, miR-29b-2-5p, miR-665, miR-132-5p, miR-2285j, miR-6134, miR-122-5p, miR-3184-5p, miR-3074-2-3p, miR-214, miR-425-5p, miR-2330-3p, miR-3074-5p, miR-3120-5p, miR-362-3p, miR-541, miR-4791, miR-143-5p, miR-329-3p, miR-496-5p, miR-145b, miR-2300a-5p, novel\_78, miR-103a-2-5p, miR-214-3p, miR-199b-5p, miR-25-5p, miR-487b-5p, miR-3955-3p, novel\_124, miR-362-3p, miR-5126, miR-8485, miR-1388-3p, miR-1983, miR-335-3p, miR-199b-5p, miR-361-3p, miR-652-3p, miR-25, miR-3596, miR-7977, miR-126b-5p, miR-2285u, miR-10b, miR-335, miR-4726-5p, miR-107-5p, novel\_82, miR-382-3p, miR-2285n, miR-423-5p, miR-361-3p, miR-3956-3p, miR-363-3p, miR-541-3p, novel\_60, miR-155-5p, miR-1343-5p, miR-1290, novel\_127, miR-92a-3p, miR-200c-3p, miR-2898, miR-450a-2-3p, miR-200c, miR-490-3p, miR-2285b, miR-3065-3p, miR-199a-5p, miR-92b-3p, miR-4286, miR-29b-2-5p, miR-671-5p, miR-7144-5p, miR-329a, miR-767, miR-3154, miR-3957, miR-223-5p, miR-199a-5p, miR-25-3p, miR-1271, miR-2355-5p, miR-3957-5p, miR-28-5p, miR-767-5p, miR-138-5p, miR-135a-5p, miR-6740-5p, miR-5100, miR-410-5p, miR-2903, miR-133a-3p, miR-6128, miR-1306-5p, miR-4508, miR-219a-1-3p, miR-138, miR-145a-5p, miR-22-3p, miR-1434-3p, miR-7b-5p, miR-412-5p, miR-3535, miR-340-3p, miR-193a-3p, miR-1343-5p, miR-2331-5p, novel\_51, miR-3141, miR-32, miR-7-5p, miR-503-3p, miR-22841, miR-432-3p, miR-432-3p, miR-101-5p, miR-363-

miR-769, miR-487a-3p, miR-370-3p, miR-2285aa, miR-34b-5p, miR-3074-1-3p, miR-23a-5p, miR-331-5p, miR-488-3p, miR-362-5p, miR-18a, miR-3154, miR-320a, miR-1260b, miR-500b-5p, miR-181c-3p, miR-193a-5p, miR-16-5p, miR-331-5p, miR-486b-3p, miR-331-3p, miR-322-5p, miR-129-1-3p, miR-582-3p, miR-429-3p, miR-2285ad, miR-18b-5p, miR-7641, miR-582-3p, let-7d, miR-200b-3p, miR-345-3p, miR-330-5p, miR-148b-5p, miR-490-3p, miR-2284a, novel\_39, let-7g, miR-2284y, miR-3064-5p, miR-29b-2-5p, miR-200c-3p, miR-191-3p, let-7f-5p, miR-450a-2-3p, novel\_96, miR-543-5p, miR-200c, miR-6119-5p, miR-1260a, miR-376b-3p, let-7c-5p, miR-30c-2-3p, miR-670-3p, miR-2404, miR-320c, miR-6535, miR-3074-5p, novel\_68, miR-320b, miR-1291, miR-195a-5p, miR-6395, miR-505-3p, let-7e-5p, miR-2319a, miR-146b-5p, miR-18b, miR-2387, miR-2285ab, miR-376b-3p, miR-150-5p, miR-24-3p, miR-2428, miR-326-3p, miR-495-3p, miR-128-1-5p, miR-656-5p, miR-15a, miR-502-5p, let-7i, miR-16a, miR-134-3p, miR-185-5p, let-7g-5p, miR-3431, miR-544b, miR-219a-1-3p, miR-1260b, miR-30b-3p, miR-16b, miR-7862, miR-27b-3p, miR-497-5p, miR-7b-5p, miR-3071-5p, miR-145a-5p, miR-197-3p, miR-432-3p, miR-432-3p, miR-2285r, miR-345-5p, miR-146a, miR-7-5p, miR-2411-3p, miR-6130, miR-2284s, let-7i-5p, miR-15b-5p, miR-30c-1-3p, miR-221-5p, miR-296-3p, miR-154a-3p, miR-154b-3p, miR-345-5p, miR-18a-5p, miR-625-5p, miR-433-3p, miR-500a-3p, miR-769-5p, miR-6134, let-7b-5p, miR-3184-5p, miR-3074-5p, miR-4510, miR-129-2-3p, let-7b, miR-590-3p, miR-539-5p, miR-665-5p, miR-664a, miR-500, miR-424-5p, miR-4492, miR-2285j, let-7f, miR-665, miR-29b-2-5p, miR-200b, miR-15a-5p, miR-328-3p, miR-671-3p, miR-532-3p, miR-505-3p, miR-212-5p, miR-1b-3p, miR-4429, miR-361-5p, miR-148a-5p, miR-2284u, miR-218-1-3p, miR-133a-3p, miR-1061, miR-1434-5p, miR-188-3p, miR-140-3p, miR-5703, miR-

TTL4      ENSOARGO(tubulin)

MLC1

ENSOARGO(megalenc)

miR-3607-3p, miR-1260b, miR-365a-5p, miR-29b-3p, miR-551b-3p, miR-2332, miR-370-5p, miR-486b-3p, miR-28-5p, miR-487a-3p, miR-874-3p, miR-324-5p, miR-133c, miR-199a-5p, miR-154b-5p, miR-137-3p, miR-3064-5p, miR-2403, miR-4286, miR-199a-5p, miR-490-3p, miR-1271-3p, miR-1260a, miR-2898, miR-191-3p, miR-543-5p, novel\_127, miR-299a-3p, miR-29d-3p, miR-7134-5p, miR-128-3p, miR-135a-2-3p, miR-335-5p, miR-193b-3p, miR-29c-3p, miR-1193, miR-24-3p, miR-1307-3p, miR-2285m, miR-199b-5p, miR-133a-5p, miR-128-1-5p, miR-29a, miR-502b, miR-378b, miR-320b, miR-29a-3p, miR-299b-3p, miR-670-3p, miR-6535, miR-669, miR-18a-3p, miR-216a-3p, miR-146b-5p, miR-505-3p, miR-6395, miR-6240, miR-363-5p, miR-628-5p, miR-539-3p, miR-146a, miR-377-3p, miR-330-3p, miR-365b-5p, miR-193a-3p, miR-3431, miR-149-5p, miR-22-3p, miR-29b, miR-1260b, miR-4508, miR-744-5p, miR-4510, miR-145a-3p, miR-3074-2-3p, miR-665-5p, miR-346, miR-3184-5p, miR-338-3p, miR-874-5p, miR-708-5p, miR-154a-3p, miR-216b-3p, miR-370-5p, miR-377-3p, miR-6130, miR-193b-3p, miR-22-3p, miR-299, miR-154b-3p, miR-1827, miR-487a, miR-2887, miR-125b-2-3p, miR-486-3p, miR-146a-5p, miR-210-5p, miR-219b-5p, miR-185-3p, miR-760-3p, miR-299-3p, miR-18a-3p, miR-485-3p, miR-212-5p, miR-505-3p, miR-487a-3p, miR-1247-5p, miR-328-3p, miR-2366, miR-124-3p, miR-1197-5p, miR-140-3p, miR-941, miR-33b-3p, miR-142-3p, miR-6527, miR-361-3p, miR-423-5p, miR-2440, miR-335, miR-154-3p, miR-3064-5p, miR-452-3p, miR-25, miR-2483-3p, miR-361-3p, miR-199b-5p, miR-1388-3p, miR-124a, miR-4532, novel\_103, miR-3085-3p, novel\_124, miR-199b-5p, miR-146b, miR-330-3p, miR-425-3p, miR-216a-3p, miR-2459, miR-484, miR-296-5p, miR-101c

|        |                     |                                                                                                                                                                                                                                                                                                                                                                                                                                                                                                                                                                                                                                                                                                                                                                                                                                                                                                                                                                                                                                                                                                                                                                                                                                                                                                                                                                                                                                                                                                                                                                                                                   |
|--------|---------------------|-------------------------------------------------------------------------------------------------------------------------------------------------------------------------------------------------------------------------------------------------------------------------------------------------------------------------------------------------------------------------------------------------------------------------------------------------------------------------------------------------------------------------------------------------------------------------------------------------------------------------------------------------------------------------------------------------------------------------------------------------------------------------------------------------------------------------------------------------------------------------------------------------------------------------------------------------------------------------------------------------------------------------------------------------------------------------------------------------------------------------------------------------------------------------------------------------------------------------------------------------------------------------------------------------------------------------------------------------------------------------------------------------------------------------------------------------------------------------------------------------------------------------------------------------------------------------------------------------------------------|
|        |                     | miR-455-3p, miR-221-3p, miR-142-5p, miR-181b-2-3p, miR-5010-3p, novel_4, miR-1343-3p, miR-151a-3p, miR-125b-2-3p, miR-412-3p, miR-301b-5p, miR-296-5p, miR-484, miR-2310, miR-1b-5p, miR-193a, miR-101b-3p, miR-124a, novel_103, miR-320b, miR-489, miR-7689-3p, miR-2285u, miR-452-3p, miR-139-5p, miR-493-5p, miR-335-3p, miR-129b-5p, miR-221, miR-6527, miR-499a-5p, miR-301a-5p, miR-101-3p, miR-382-3p, miR-2285n, miR-200b, miR-148b-3p, miR-383-5p, miR-16-1-3p, miR-4429, novel_73, miR-124-3p, miR-193b-5p, miR-2366, miR-2424, miR-181b-1-3p, miR-21-3p, miR-3653-3p, miR-320d, miR-345-3p, miR-500a-5p, miR-139-5p, miR-216b-5p, miR-6516, miR-552-3p, miR-21-3p, miR-1827, novel_99, miR-543-3p, miR-433-3p, miR-450a-1-3p, miR-21a-3p, miR-142a-5p, miR-3074-5p, miR-539-5p, miR-708-5p, miR-129-5p, miR-450b-3p, miR-665, miR-151-3p, miR-222-3p, miR-103, miR-2355-3p, miR-3431, miR-185-5p, miR-103a-3p, miR-31-5p, miR-219a-1-3p, miR-16-1-3p, miR-450c-3p, miR-708-3p, miR-493-5p, miR-2411-3p, miR-365b-5p, miR-181b-3p, miR-320c, miR-144-3p, miR-6535, miR-677, miR-3074-5p, miR-107, miR-1291, miR-3591-3p, miR-148a-3p, miR-2285m, miR-24-3p, miR-495-3p, miR-656-5p, miR-625-3p, miR-450a-1-3p, miR-582-3p, miR-6516-5p, miR-412, miR-429-3p, miR-222, miR-2285ad, miR-200b-3p, miR-345-3p, miR-450b-5p, miR-200a-3p, miR-543-5p, miR-152-3p, miR-107, miR-200c-3p, miR-2898, miR-3071-3p, miR-200c, miR-125a-3p, miR-205-5p, miR-141-3p, miR-3956, miR-2285aa, miR-1248, let-7g-3p, miR-320a, miR-365a-5p, miR-6128, miR-1306-5p, miR-28-5p, miR-410-3p, miR-144, miR-6740-5p, novel_63 |
| PCYOX1 | ENSOARGOC prenylcy  | miR-188-3p, miR-196a-3p, miR-2366, miR-4492, miR-320b, novel_42, miR-874-3p, miR-371b-3p                                                                                                                                                                                                                                                                                                                                                                                                                                                                                                                                                                                                                                                                                                                                                                                                                                                                                                                                                                                                                                                                                                                                                                                                                                                                                                                                                                                                                                                                                                                          |
| NDRG2  | ENSOARGOC NDRG fam  | miR-452-5p, miR-200a, miR-376b-3p, miR-324-3p, novel_127, miR-200a-3p, miR-18a-3p, miR-2319b, miR-141-3p, miR-376b-3p, miR-376d, miR-2300b-3p, miR-18a-3p, miR-376b-3p, miR-450b-5p, miR-376a-3p                                                                                                                                                                                                                                                                                                                                                                                                                                                                                                                                                                                                                                                                                                                                                                                                                                                                                                                                                                                                                                                                                                                                                                                                                                                                                                                                                                                                                  |
| TIA1   | ENSOARGOC TIA1 cyt, |                                                                                                                                                                                                                                                                                                                                                                                                                                                                                                                                                                                                                                                                                                                                                                                                                                                                                                                                                                                                                                                                                                                                                                                                                                                                                                                                                                                                                                                                                                                                                                                                                   |



miR-544b, miR-235b-3p, miR-2284d, miR-377-5p, miR-7862, miR-30b-3p, miR-380-3p, miR-2284ab, miR-219a-1-3p, miR-145a-5p, miR-194-5p, miR-873a-5p, miR-1434-3p, miR-1285, miR-130b-5p, miR-197-5p, miR-190a, miR-146b-3p, miR-2404, miR-195a-5p, miR-6395, miR-6516-3p, miR-1291, miR-376b-3p, miR-2387, miR-326-3p, miR-2428, miR-323c, miR-1193, miR-136-3p, miR-656-5p, miR-22-5p, miR-92a-3p, miR-128-1-5p, novel\_1, miR-16a, miR-15a, miR-545-5p, miR-1271-5p, miR-483-3p, miR-222, miR-496, miR-411-3p, miR-345-3p, miR-3578, miR-1957a, miR-2284a, miR-1271-3p, miR-2478, miR-2385-3p, miR-4286, miR-181a-2-3p, miR-92a-3p, miR-450a-2-3p, miR-30c-2-3p, miR-217, miR-2285af, miR-154b-5p, miR-370-3p, miR-7144-5p, miR-3074-1-3p, miR-320a, miR-503-3p, miR-365a-5p, miR-374a-3p, miR-3607-3p, miR-103b, miR-409-3p, miR-3969, miR-410-5p, miR-370-5p, miR-99b-3p, miR-2332, miR-221-3p, miR-2284aa, miR-3120-5p, miR-101a-5p, miR-544a, miR-7857, miR-30b-3p, miR-193a, miR-30c-1-3p, miR-424-5p, miR-25-5p, miR-3955-3p, miR-320b, miR-326, miR-489, miR-3082-5p, miR-499b-5p, miR-877-3p, miR-8095, miR-1296-5p, miR-452-5p, miR-194b-5p, miR-541-3p, miR-2285t, miR-374a-3p, miR-107-5p, miR-382-3p, miR-616-3p, miR-15a-5p, miR-1b-3p, miR-3600, miR-485-3p, miR-378d, miR-4429, miR-2904, miR-124-3p, miR-5703, miR-188-3p, miR-1193, miR-2300b-3p, miR-146a-5p, miR-29b-1-5p, miR-183-5p, miR-320d, miR-2284m, miR-466i-5p, miR-22-3p, miR-204-3p, miR-877-5p, miR-544-3p, miR-139-5p, miR-193b-3p, miR-370-5p, miR-532-5p, miR-182-5p, miR-496-3p, miR-582-5p, miR-21a-3p, miR-1271, miR-3074-2-3p, miR-145a-3p, miR-424-5p, miR-222-3p, miR-31-5p, miR-3955-5p, miR-497-5p, miR-188-5p, miR-2284x, miR-16b, miR-22-3p, novel\_23, miR-223-3p, miR-2113, let-7j, miR-432-3p, miR-2284l, miR-432-3p, let-7f-2-3p, let-7f-2-3p, miR-106b-3p, miR-193a-3p, miR-483-3p, miR-

miR-848b, miR-1b-5p, miR-2310, miR-574-3p, miR-382-3p, miR-2284b, miR-652-5p, miR-199b-5p, miR-103a-2-5p, miR-1468, miR-320b, miR-199a-3p, novel\_103, miR-29b-1-5p, miR-505, miR-1298-3p, miR-9788-3p, miR-148b-5p, miR-199b-3p, miR-1388-5p, miR-450b-5p, miR-101c, miR-484, miR-877-3p, miR-7705, miR-154a, miR-32-3p, miR-212-3p, miR-2285f, miR-181d-5p, miR-194b-5p, miR-190b-5p, miR-2285t, miR-374a-3p, miR-382-3p, miR-2440, miR-101-3p, miR-371a-5p, miR-107-5p, miR-4792, miR-20a-3p, miR-452-3p, miR-7977, miR-877-3p, miR-199b-5p, miR-29b-1-5p, miR-130a-5p, miR-125b-2-3p, miR-2424, miR-2432, miR-105-3p, miR-221-5p, miR-3653-3p, miR-196a-3p, miR-618, novel\_17, miR-26a-5p, miR-210-5p, miR-324-3p, miR-23c, miR-200b, miR-199a-3p, miR-493-3p, novel\_73, miR-142-3p, miR-4429, miR-148a-5p, miR-2284u, miR-361-5p, miR-1197-5p, miR-217-5p, miR-224-5p, miR-145a-3p, miR-17-3p, miR-487b-5p, miR-190a-5p, miR-1468-5p, miR-582-5p, miR-6516, miR-22-3p, miR-877-5p, miR-2331-3p, miR-221-5p, miR-32-3p, miR-3065-3p, miR-296-3p, miR-2312, miR-582-5p, miR-186-5p, miR-299, miR-3613-5p, miR-411, miR-432-3p, miR-1343-5p, miR-466f-3p, miR-224-5p, miR-190a, miR-194a, miR-412-5p, novel\_116, miR-2355-3p, miR-133b-5p, miR-1843b-5p, miR-1434-3p, miR-22-3p, miR-194-5p, miR-323c, novel\_27, miR-2284w, miR-199b-5p, miR-17-3p, miR-495-3p, miR-2285x, miR-379-3p, miR-22-5p, miR-199c, miR-3613, novel\_87, miR-670-3p, miR-655-5p, miR-3120-3p, miR-26b-5p, miR-2285ab, miR-2387, miR-200a, miR-199a-5p, miR-3065-3p, miR-2284y, miR-2285b, miR-29b-2-5p, miR-181a-2-3p, miR-17-3p, miR-200c-3p, miR-127-5p, miR-205-5p, miR-200c, miR-217, miR-505-5p, miR-6516-5p, miR-214-5p, miR-2285ad, miR-429-3p, miR-411-3p, miR-200b-3p, miR-1343-5p, miR-23b-5p, miR-374a-3p, miR-145-3p, miR-1306-5p, miR-374b-3p, miR-410-5p, miR-135a-1-3p, miR-5100, miR-100a-5p, miR-

miR-134-5p, miR-331-3p, miR-6740-5p, miR-494-5p, miR-29b-3p, miR-374a-3p, miR-144-5p, miR-6128, let-7e-3p, miR-1814c, miR-7144-5p, miR-3074-1-3p, miR-376c-5p, miR-23a-5p, miR-345-5p, miR-376c-5p, miR-381-3p, miR-488-3p, miR-223-5p, miR-769, miR-2285aa, miR-487a-3p, miR-543-5p, miR-200c-3p, miR-17-3p, miR-339a, miR-200c, miR-205-5p, miR-3065-3p, miR-29a-5p, miR-148b-5p, miR-3064-5p, miR-1, miR-29b-2-5p, miR-200b-3p, miR-300, miR-23b-5p, miR-29d-3p, miR-134, miR-134-5p, miR-450a-1-3p, miR-758-5p, miR-483-3p, miR-1271-5p, novel\_79, miR-7641, miR-429-3p, miR-22-5p, miR-625-3p, miR-206, miR-29a, miR-3613, miR-374c-5p, miR-24-3p, miR-29c-3p, miR-17-3p, miR-19a-3p, miR-378b, miR-1306, miR-2387, miR-376b-5p, miR-181b-3p, miR-677, miR-29a-3p, miR-323a-5p, miR-3120-3p, miR-655-5p, novel\_68, miR-483-3p, miR-378a-5p, novel\_51, miR-194a, miR-105-5p, let-7d-3p, miR-345-5p, miR-539-3p, miR-654-3p, miR-130b-5p, miR-26a-2-3p, miR-29b, miR-194-5p, novel\_23, miR-450c-3p, miR-149-5p, miR-185-5p, miR-26b-3p, miR-339-5p, miR-130b-5p, miR-874-5p, miR-487a-5p, miR-17-3p, miR-6516-3p, miR-450b-3p, novel\_74, miR-655-3p, miR-664a-5p, miR-29b-2-5p, miR-206-3p, miR-769-5p, miR-1271, miR-145a-3p, novel\_99, miR-1827, miR-186-5p, miR-625-5p, miR-543-3p, miR-154b-3p, miR-345-5p, miR-339b, miR-655, miR-433-3p, miR-450a-1-3p, miR-3613-5p, miR-21a-3p, miR-216b-5p, miR-323-5p, miR-296-3p, miR-3065-3p, miR-154a-3p, miR-2331-3p, miR-3653-3p, miR-92a-1-5p, novel\_17, miR-2424, miR-125b-2-3p, miR-29b-1-5p, miR-487a, miR-105-3p, miR-2285w, miR-216c-5p, miR-361-5p, miR-378d, miR-664-5p, miR-19b-3p, miR-1197-5p, miR-5703, miR-376a-5p, miR-2284h-5p, miR-222-5p, miR-200b, miR-487a-3p, miR-7859, miR-485-3p, miR-548e-3p, miR-154-3p, miR-374a-3p, miR-2285t, miR-490-5p, miR-107-5p, miR-769-5p, miR-2440, miR-154a, miR-104b-5p, miR-3050, miR-2433, miR-28c, miR-576-3p, miR-128-1-5p, miR-138-5p, miR-193b-3p, miR-3059-5p, miR-338-3p, miR-3591-3p, miR-23b, miR-503-3p, miR-1895, miR-542-5p, miR-21-3p, miR-2285aa, miR-370-3p, miR-7977, novel\_32, miR-6535, miR-411b-3p, miR-3082-5p, miR-193b-3p, miR-92a-1-5p, miR-1343-5p, miR-193a-3p, novel\_96, miR-491-5p, miR-2898, miR-760-3p, miR-466i-5p, miR-25-5p, miR-668-3p, miR-23a-3p, miR-363-5p, miR-28b, miR-432-3p, miR-377-5p, miR-1343-5p, miR-1197-5p, miR-140-3p, miR-378d, miR-138, miR-941, miR-377-5p, miR-212-5p, miR-3960, novel\_83, miR-1247-5p, miR-2459, miR-23b-3p

SMCO2

ENSOARGO(single-p)

CCDC108

ENSOARGO(coiled-c)

miR-362-3p, novel\_11b, miR-326, miR-342, miR-395b-3p, miR-376b, miR-382-3p, miR-424-5p, miR-494-3p, miR-30c-1-3p, miR-30b-3p, miR-378b, miR-484, miR-16-2-3p, miR-544a, miR-450b-5p, miR-101a-5p, miR-378c, miR-409b, miR-9788-3p, miR-107-5p, miR-371a-5p, miR-3958-3p, miR-452-5p, miR-2285f, miR-212-3p, miR-32-3p, miR-3059-5p, miR-129b-5p, miR-361-3p, miR-499b-5p, miR-452-3p, miR-664b, miR-376d, miR-378e, miR-125b, miR-374a-5p, miR-466i-5p, miR-2284m, miR-2432, miR-146a-5p, miR-125b-2-3p, miR-1197-5p, miR-140-3p, miR-362-3p, miR-1246, novel\_133, miR-505-3p, miR-1b-3p, miR-15a-5p, miR-487a-5p, miR-424-5p, miR-17-3p, miR-2330-3p, miR-4510, miR-539-5p, miR-378c, miR-2312, miR-21-3p, miR-370-5p, miR-660-5p, miR-32-3p, miR-378a-3p, novel\_25, miR-204-3p, miR-6130, miR-544-3p, miR-455-5p, miR-330-3p, miR-224-5p, miR-125a-5p, miR-452-5p, miR-660, miR-124-5p, miR-101-5p, miR-130b-5p, miR-654-3p, miR-455-5p, miR-219a-1-3p, miR-30b-3p, miR-2284ab, miR-665, miR-133b-5p, miR-544b, miR-2284d, miR-16a, miR-502-5p, miR-15a, miR-147-5p, miR-92a-3p, miR-1193, miR-17-3p, miR-342-3p, miR-326-3p, miR-3959-3p, miR-376b-3p, miR-18a-3p, miR-2285ab, miR-505-3p, miR-195a-5p, miR-135b-5p, miR-450b-3p, miR-339a, miR-30c-2-3p, miR-376b-3p, miR-543-5p, miR-92a-3p, miR-17-3p, miR-490-3p, miR-1957a, miR-376c-5p, miR-376b-5p, miR-380-5p, miR-128-3p, miR-300, miR-582-3p, miR-196a-2-3p, miR-582-3p, miR-545-5p, miR-483-3p, miR-378h, miR-135a-5p, miR-144, miR-370-5p, miR-410-5p, miR-34c-3p, miR-374b, miR-378c, miR-3154, miR-2448-3p, miR-381-3p, miR-488-3p, miR-1814c, miR-3074-1-3p, miR-370-3p, miR-2284n, miR-3965, miR-16b, miR-214-3p, miR-103a-2-5p, miR-146b, miR-2310, miR-378d, miR-329-3p, miR-362-3p, miR-1388-5p, miR-181b-2-3p, miR-330-3p, miR-126a-5p, miR-421, miR-539-5p, miR-376b-3p, miR-2410, miR-218-5p, miR-100a-5p, miR-2284i, miR-0-5p, miR-362-3p, miR-2411-3p, miR-345-3p, miR-664-3p, miR-660, miR-92a-3p, miR-204-5p, miR-92a-3p, miR-181b-5p, miR-181d-5p, miR-363-3p, miR-493-5p, miR-92b-3p, miR-211, miR-664b-3p, miR-3591-3p, miR-488-3p, miR-345-3p, miR-3613-5p, miR-7144-5p, miR-493-5p, miR-216b-3p, miR-21-3p, miR-211-5p, miR-32-5p, miR-664b, miR-660-5p, miR-877-5p, miR-499a-3p, miR-25-3p

PARP2 ENSOARGO(poly (ADP

OR11H6 ENSOARGO(olfactor

miR-2428, novel\_27, miR-24-3p, miR-29c-3p, miR-29a, miR-16a, miR-502-5p, miR-15a, novel\_69, miR-299b-3p, miR-670-3p, miR-29a-3p, miR-3120-3p, novel\_68, miR-195a-5p, miR-2319a, miR-3591-3p, miR-21c, miR-376b-5p, let-7a-2-3p, miR-432-3p, miR-432-3p, miR-130b-5p, miR-125a-5p, miR-124-5p, miR-2411-3p, miR-377-3p, miR-149-5p, miR-2284d, miR-26b-3p, miR-497-5p, miR-219a-1-3p, miR-1260b, miR-125b-1-3p, miR-2284ab, miR-29b, miR-30b-3p, miR-16b, miR-145a-5p, novel\_23, miR-3071-5p, miR-1434-3p, miR-1285, miR-1260b, miR-500b-5p, miR-6128, miR-16-5p, miR-2284v, miR-134-5p, miR-486b-3p, miR-409-3p, miR-125b-5p, miR-2284k, miR-29b-3p, miR-2284n, miR-154b-5p, miR-3959-5p, miR-365a-3p, miR-331-5p, miR-125a, miR-574-5p, miR-376c-5p, miR-3154, miR-376c-5p, miR-362-5p, miR-192-3p, miR-2285b, novel\_39, miR-29a-5p, miR-3065-3p, miR-148b-5p, miR-191-3p, miR-127-5p, miR-205-5p, miR-1260a, miR-134-5p, miR-2284z, miR-322-5p, miR-299a-3p, let-7a-2-3p, miR-155-5p, miR-2427, miR-29d-3p, miR-134, miR-345-3p, miR-7705, miR-362-5p, miR-2284j, miR-3964, miR-490-5p, miR-301a-5p, miR-101-3p, miR-203-3p, miR-489, miR-20a-3p, novel\_94, miR-335-3p, miR-361-3p, miR-1b-5p, miR-744-3p, miR-2330-5p, miR-424-5p, miR-1468, miR-16b, miR-2459, miR-500-5p, miR-9788-3p, miR-145b, miR-2284aa, miR-101c, miR-30b-3p, miR-7857, miR-301b-5p, miR-338-3p, miR-122-5p, miR-433-5p, miR-669a-3p, miR-130b-5p, miR-424-5p, miR-1468-5p, miR-129-5p, miR-208b-5p, miR-155-5p, miR-155-5p, miR-15b-5p, miR-582-5p, miR-377-3p, miR-3065-3p, miR-21-3p, miR-2331-3p, miR-186-5p, miR-21a-3p, miR-486-3p, miR-2424, miR-664b-3p, miR-21-3p, miR-299-3p, miR-30b-3p, miR-2284m, miR-125b, miR-500a-5p, miR-532-3p, miR-15a-5p, miR-3600, miR-378d, miR-142-3p, novel\_73, miR-5703, miR-140-3p

miR-214, miR-4510, miR-3074-5p, miR-6134, miR-338-3p, miR-769-5p, novel\_44, miR-324-3p, miR-320e, miR-424-5p, miR-874-5p, miR-4492, miR-130b-5p, miR-664a, miR-296-3p, miR-30c-1-3p, miR-221-5p, novel\_32, miR-204-3p, miR-877-5p, miR-15b-5p, miR-192-5p, miR-323-5p, miR-6130, miR-433-3p, miR-1827, miR-339b, miR-20a, miR-345-3p, miR-2411, miR-486-3p, miR-377-5p, miR-324-3p, miR-345-3p, miR-92a-1-5p, miR-185-3p, miR-221-5p, miR-106a, miR-760-3p, miR-106a, miR-328-3p, miR-15a-5p, miR-2904, miR-124-3p, miR-1197-5p, miR-217-5p, miR-140-3p, novel\_133, miR-215-5p, miR-2408, miR-2300b-3p, miR-184-3p, novel\_73, miR-33b-3p, miR-2447, novel\_60, miR-3956-3p, miR-361-3p, miR-769-5p, miR-218-5p, miR-3968, miR-211-5p, miR-241-5p, miR-3064-5p, miR-20a-3p, miR-4443, miR-378g, miR-361-3p, novel\_94, miR-652-5p, miR-124a, miR-494-3p, miR-424-5p, miR-106a-5p, miR-4532, miR-30c-1-3p, novel\_19, miR-16b, miR-106b-5p, miR-431-5p, miR-1306-5p, miR-326, miR-214-3p, miR-491-5p, miR-3085-3p, miR-222-5p, novel\_78, miR-2300a-5p, novel\_4, miR-1343-3p, miR-30b-3p, miR-296-5p, miR-3120-5p, miR-16-5p, miR-181a-2-3p, miR-93, miR-331-3p, miR-3969, miR-2433, miR-486b-3p, miR-204-5p, miR-592, miR-138-5p, miR-370-3p, miR-542-5p, miR-615-5p, miR-215-5p, miR-154b-5p, miR-769, miR-93-5p, miR-17-5p, miR-7144-5p, miR-20b-5p, miR-3064-5p, miR-4286, novel\_39, miR-1271-3p, miR-24-2-5p, miR-30c-2-3p, miR-217, miR-339a, novel\_96, miR-2898, miR-127-5p, novel\_79, miR-431, miR-6517, miR-214-5p, miR-322-5p, miR-24-2-5p, miR-505-5p, miR-2411-5p, miR-330-5p, miR-23b-5p, miR-345-3p, miR-326-3p, miR-2428, miR-211, miR-371b-3p, miR-16a, miR-1307-5p, miR-15a, miR-20a-5p, miR-22-5p, miR-147-5p, miR-128-1-5p, miR-3120-3p, miR-3074-5p, miR-323a-5p, novel\_69, miR-1306, miR-3141, miR-6395, miR-195a-5p, miR-1291, miR-363-5p, miR-130b-5p, miR-296-3p, miR-132-3p, miR-1388-5p, miR-16-1-3p, miR-544a, miR-3120-5p, miR-181a-5p, miR-3071-5p, miR-2285g, miR-539-5p, miR-142-5p, miR-216a-3p, miR-148b-5p, miR-194-3p, miR-544b, miR-2459, miR-199b-3p, novel\_4, miR-665, miR-222-5p, miR-214-3p, miR-199a-3p, miR-296-3p, miR-2411-3p, miR-296-3p, miR-1388-3p, miR-101b-3p, let-7c-3p, miR-335-3p, miR-374c-3p, miR-6535, miR-4792, miR-320b, miR-199c, miR-30b-5p, miR-615, novel\_27, miR-181d-5p, miR-142-3p, miR-16-1-3p, miR-30c, miR-148a-5p, miR-30c-5p, miR-345-3p, miR-615-3p, miR-30a-5p, miR-487a-3p, miR-222-5p, miR-199a-3p, miR-1224-5p, miR-485-3p, miR-181b-5p, miR-1277-5p, miR-30d, miR-21-3p, miR-30b, miR-205-5p, miR-30f, miR-345-3p, miR-148b-5p, miR-29b-2-5p, miR-876-3p, miR-30f, miR-543-3p, miR-186-5p, miR-30e-5p, miR-30d-5p, miR-3154, miR-544-3p, miR-374c-3p, miR-216b-5p, miR-140-5p, miR-532-5p, miR-296-3p, miR-29b-2-5p, miR-142a-5p, miR-181c-5p, miR-3184-3p, miR-3607-3p, miR-3074-2-3p, miR-214

PLXNB2

ENSOARGO(plexin B

MAGI3

ENSOARGO( membrane

miR-2483-5p, miR-23a-3p, miR-628-5p, miR-124a, let-7a-5p, miR-182-5p, miR-2331-5p, miR-455-5p, miR-342, miR-377-3p, novel\_103, miR-466f-3p, miR-103a-2-5p, let-7e, miR-27a-3p, miR-31-5p, miR-548w, miR-421, let-7g-5p, miR-197-3p, miR-3071-5p, miR-374b-3p, miR-6529a, miR-542-3p, miR-1839-5p, miR-101c, miR-27b-3p, miR-455-5p, miR-3957-3p, miR-452-5p, miR-219a-5p, miR-342-3p, miR-2285y, let-7i, miR-107-5p, miR-2285n, miR-576-3p, miR-101-3p, miR-22-5p, miR-499a-5p, miR-655-5p, miR-664b, miR-139-5p, miR-3074-5p, miR-203-3p, let-7d-5p, miR-27a-3p, miR-499a-3p, miR-489, miR-3970, let-7e-5p, miR-136-5p, miR-2385-3p, let-7g, miR-143-3p, miR-664b-3p, let-7c-5p, miR-205-5p, miR-664-3p, let-7k, miR-98-5p, let-7f-5p, miR-2285ad, miR-532-3p, miR-23b-3p, miR-7859, miR-340-5p, miR-23c, miR-124-3p, miR-188-3p, miR-30c-5p, miR-1961, miR-142-3p, let-7d, novel\_73, miR-582-3p, miR-4429, miR-3607-3p, miR-6128, let-7b, miR-3074-5p, let-7b-5p, miR-410-5p, let-7f, miR-182-5p, miR-548o-3p, let-7i-5p, miR-499b-3p, miR-377-3p, miR-139-5p, miR-137-3p, miR-433-3p, miR-23b, miR-3154, miR-30e-5p, miR-3074-1-3p, novel\_99, miR-30f, miR-2318, miR-200a-5p, miR-381-3p, miR-3074-1-3p, miR-874-3p, miR-376c-3p, miR-374c-3p, miR-365a-3p, miR-144, novel\_63, miR-2284k, miR-34c-3p, miR-135a-1-3p, miR-191-5p, miR-330-5p, miR-345-3p, miR-128-3p, miR-105-2, miR-300, miR-412, miR-30c-2-3p, miR-2285af, miR-6119-5p, miR-125a-3p, novel\_127, miR-181b-5p, miR-30a-3p, miR-29a-5p, miR-2285b, miR-192-3p, miR-2478, miR-150-5p, miR-216a-3p, miR-18a-3p, miR-2285ab, miR-7-1-3p, miR-378b, miR-144-3p, miR-374c-3p, miR-670-3p, miR-382-5p, miR-6402, miR-421-5p, miR-147-5p, miR-6119-3p, miR-135a-2-3p, miR-326-3p, miR-2428, miR-24-3p, miR-181a-5p, miR-2284ab, miR-16-1-3p, novel\_116, miR-412-5p, miR-2285g, miR-330-3p, miR-105-5p, miR-2411-3p, miR-382, miR-6240, miR-2285r, miR-2284l, miR-500a-3p, miR-2285c, miR-543-3p, miR-2312, miR-216b-3p, miR-552-3p, miR-2331-3p, miR-30c-1-3p, miR-548o-3p, miR-376e-3p, miR-6130, miR-30a-3p, miR-324-3p, miR-151-3p, miR-665, miR-3604, miR-2285j, miR-30e-3p, miR-4492, miR-500, novel\_74, miR-3074-2-3p, miR-425-5p, miR-4510, miR-181c-5p, miR-124-3p, miR-191, miR-1246, miR-376a-5p, miR-2300b-3p, miR-16-1-3p, miR-485-3p, miR-212-5p, miR-30d-3p, miR-18a-3p, miR-548e-3p, miR-487a-3p, miR-500a-5p, miR-345-3p, novel\_17, miR-466i-5p, miR-29b-1-5p, miR-376c-3p, miR-129b-5p, novel\_94, miR-3963, miR-136-5p, miR-541-5p, miR-10b, miR-3082-5p, novel\_82, miR-101-3p, miR-490-5p, miR-2284q, miR-2285f, miR-212-3p, miR-8095, miR-7857, miR-412-3p, miR-125b-2-3p, miR-101c, miR-5010-3p, miR-105-1, miR-330-3p, novel\_4, miR-151a-3p, miR-2285e, miR-29b-1-5p, miR-326, miR-124a, miR-494-3p, miR-101b-3p, miR-8485, miR-193a, miR-1b-5p, miR-30c-1-3p

GXYLT1 ENSOARGO( glucosid

GFPT1 ENSOARGO( glutamin

miR-3065-3p, miR-32-3p, miR-574-5p, miR-664b, miR-320c, miR-320a, miR-450a-1-3p, miR-148a-3p, miR-21a-3p, novel\_99, miR-544-5p, miR-543-3p, miR-3184-3p, miR-32-3p, miR-323c, miR-502-5p, miR-450b-3p, miR-429-3p, miR-199a-3p, miR-450a-1-3p, miR-148b-3p, miR-200b, miR-222-5p, miR-450c-3p, miR-345-3p, miR-200b-3p, miR-1839-5p, miR-4429, miR-2483-5p, miR-382-3p, miR-192-3p, miR-2285b, miR-3065-3p, miR-345-3p, miR-664-3p, miR-200c, miR-320b, miR-199a-3p, miR-152-3p, miR-3653-3p, miR-3955-3p, miR-200c-3p, miR-320d, miR-3120-5p, miR-101c, miR-101a-5p, miR-544a, miR-1388-5p, miR-2284r, miR-500-5p, miR-216a-3p, miR-147a, miR-181b-2-3p, miR-27a-3p, miR-548w, miR-2300a-5p, miR-1343-3p, miR-151a-3p, miR-103a-2-5p, miR-214-3p, miR-199b-5p, miR-491-5p, miR-3085-3p, miR-29b-1-5p, miR-2957, novel\_103, miR-326, miR-320b, miR-342, miR-8485, miR-30c-1-3p, miR-382-3p, miR-494-3p, miR-877-3p, miR-1983, miR-378j, miR-381-3p, miR-199b-5p, miR-27a-3p, miR-203-3p, miR-211-5p, miR-2285u, miR-499b-5p, miR-3064-5p, miR-2284g, miR-107-5p, miR-2285n, miR-1285-5p, novel\_111, miR-362-5p, miR-9-5p, miR-4429, miR-142-3p, miR-98-3p, miR-215-5p, miR-376a-5p, miR-1246, novel\_133, miR-532-3p, miR-23c, miR-23b-3p, miR-548e-3p, miR-21-3p, miR-3653-3p, miR-466i-5p, miR-320d, miR-500a-5p, miR-26a-5p, miR-2285p, miR-376c-3p, miR-377-5p, miR-181b-1-3p, miR-376a-5p, miR-29b-1-5p, miR-329a-5p, miR-1827, miR-625-5p, miR-27b-5p, miR-21a-3p, miR-155-5p, miR-544-3p, miR-376e-3p, miR-192-5p, miR-377-3p, miR-552-3p, miR-216b-3p, miR-370-5p, miR-30c-1-3p, miR-208b-5p, miR-129-5p, miR-155-5p, miR-3604, miR-151-3p, miR-346, miR-98-3p, miR-6525, miR-214, miR-425-5p, miR-27b-3p, miR-1260b, miR-29b, miR-432, miR-544b, miR-411-5p, miR-185-5p, miR-3431, miR-3535, miR-432-5p, miR-377-5p, miR-665, miR-133b-5p, miR-466f-3p, miR-377-3p, miR-432-3p, miR-654-3p, miR-101-5p, miR-2483-5p, miR-412-3p, miR-378b, miR-216a-3p, miR-150-5p, miR-181b-3p, miR-677, miR-320c, miR-6535, novel\_69, miR-29a-3p, miR-26b-5p, miR-320b, miR-329-5p, miR-147-5p, miR-421-5p, miR-29a, miR-502-5p, miR-199b-5p, miR-326-3p, miR-24-3p, miR-211, miR-29c-3p, novel\_101, miR-495-3p, miR-2285x, miR-1193, miR-342-3p, miR-155-5p, miR-128-3p, miR-330-5p, miR-29d-3p, miR-134, miR-134-5p, miR-582-3p, miR-9-5p, novel\_96, miR-30c-2-3p, miR-1260a, miR-2284a, miR-2284v, miR-200a, miR-100a-5p, miR-148b-5p, miR-

FGFR10P2 ENSOARGO(FGFR1 on

GSK3B ENSOARGO( glycogen



miR-412-3p, miR-639b, miR-376a-2-5p, miR-2387, miR-306b-5p, miR-216a-3p, miR-2404, miR-34b, miR-320c, miR-677, miR-669, miR-181b-3p, miR-7-1-3p, miR-3120-3p, miR-203b-5p, miR-147-5p, miR-4324, miR-6529b, miR-34c, miR-382-5p, miR-24-3p, miR-449a, miR-2428, miR-301b-3p, miR-2284w, miR-1a-1-5p, miR-193b-3p, miR-495-3p, novel\_101, miR-2285x, miR-30b-3p, miR-380-3p, miR-219a-1-3p, miR-16-1-3p, miR-27b-3p, miR-7862, miR-19b-2-5p, miR-7b-5p, miR-542-3p, miR-181a-5p, miR-1434-3p, miR-3071-5p, miR-412-5p, miR-2284d, miR-185-5p, novel\_116, miR-31-5p, miR-665, miR-130a-3p, miR-378a-5p, miR-196b-5p, miR-466f-3p, miR-193a-3p, miR-224-5p, miR-7-5p, miR-2411-3p, miR-432-3p, miR-2284l, miR-432-3p, let-7j, miR-345-5p, miR-130b-5p, miR-101-5p, let-7f-2-3p, let-7f-2-3p, miR-10b-3p, miR-345-5p, miR-2318, miR-671-5p, miR-30e-5p, miR-3154, miR-320a, miR-34c-5p, miR-365a-3p, miR-574-5p, miR-2285aa, miR-370-3p, miR-1271, miR-141-3p, miR-134-5p, miR-486b-3p, miR-191-5p, miR-1-5p, miR-34c-3p, miR-6740-5p, miR-1197-3p, miR-2284v, miR-103b, miR-128-3p, miR-345-3p, miR-196a-5p, miR-3591-5p, miR-1290, miR-134, miR-30a-5p, miR-6516-5p, miR-2284z, miR-134-5p, miR-129-1-3p, miR-7641, miR-412, miR-376a-5p, miR-1a-2-5p, miR-181b-5p, miR-127-5p, miR-200c-3p, miR-200a-3p, miR-664-3p, miR-30c-2-3p, miR-3071-3p, miR-217, novel\_39, miR-2284y, miR-29a-5p, miR-2284a, miR-3529-3p, miR-495-5p, miR-29b-2-5p, miR-181a-2-3p, miR-299b-5p, miR-668-5p, miR-335-3p, miR-1983, miR-9-3p, miR-140-5p, miR-378j, miR-25, miR-499a-3p, miR-2483-3p, miR-203-3p, miR-1185-2-3p, miR-27a-3p, miR-2284g, miR-664b, miR-452-3p, miR-20a-3p, miR-2319b, miR-2285u, miR-499a-5p, miR-7134-3p, miR-218-5p, miR-2285n, miR-107-5p, miR-3059-5p, miR-212-3p, miR-885-5p, miR-452-5p, miR-2284j, miR-181d-5p, miR-101a-5p, miR-450b-5p, miR-299a-5p, miR-2284aa, miR-16-5p, miR-345-5p, let-7a-2-3p, miR-323b-3p, miR-326, miR-5126, miR-503-5p, miR-320b, miR-466f-3p, miR-660, miR-1343-5p, miR-133b-5p, miR-122-3p, miR-9788-3p, miR-455-3p, miR-185-5p, miR-503-5p, miR-30b-3p, miR-323b, miR-301b-5p, miR-542-3p, miR-744-5p, miR-2284x, miR-4508, miR-30b-3p, miR-2447, miR-2428, miR-326-3p, miR-8095, miR-301a-5p, miR-2284q, miR-2285t, miR-4726-5p, miR-7977, miR-3120-3p, miR-541-5p, miR-320c, miR-411b-3p, miR-148a-3p, miR-2387, miR-6516-3p, miR-504, miR-181a-2-3p, miR-503-5p, novel\_39, miR-185-3p, miR-122-3p, miR-2397-5p, miR-543-5p, miR-152-3p, miR-127-5p, miR-320d, miR-148b-3p, miR-188-3p, miR-330-5p, miR-5703, miR-1343-5p, miR-2366, let-7a-2-3p, miR-4429, miR-885-3p, miR-3074-2-3p, miR-4510, novel\_42, miR-1306-5p, miR-132-5p, miR-4492, miR-6516-3p, miR-664a, miR-216b-3p, miR-660-5p, miR-504-5p, miR-204-3p, miR-6130, miR-3154, miR-320a, miR-129b-3p, miR-485-5p, miR-1827, miR-885-3p, miR-7144-5p, miR-345-5p, miR-2318, let-7g-3p, miR-345-5p

PHTF1 ENSOARGO(putative

PPP6R2 ENSOARGO( protein

miR-107, miR-2284e, miR-135b-5p, miR-195a-5p, miR-376b-5p, miR-216a-3p, miR-3970, miR-374c-3p, miR-144-3p, miR-3074-5p, miR-6402, miR-15a, miR-502-5p, miR-33a-3p, miR-382-5p, miR-425-5p, miR-2284o, miR-16a, miR-211, miR-219b-3p, miR-2285x, novel\_101, miR-758-5p, miR-219a-1-3p, miR-16b, miR-497-5p, miR-223-3p, miR-1434-3p, novel\_23, miR-374b-3p, miR-3431, miR-103, miR-411-5p, miR-133b-5p, miR-103a-3p, miR-339-5p, novel\_51, miR-2411-3p, miR-654-3p, miR-345-5p, miR-503-3p, miR-380-5p, miR-363-5p, miR-382, miR-345-5p, miR-10b-3p, miR-671-5p, miR-376c-5p, miR-7144-5p, miR-331-5p, miR-301, miR-2448-3p, miR-503-3p, miR-30e-5p, miR-488-3p, miR-3154, miR-376c-5p, miR-365a-3p, miR-300-3p, miR-331-5p, miR-374c-3p, miR-154b-5p, miR-874-3p, miR-598-3p, miR-331-5p, miR-204-5p, miR-134-5p, miR-191-5p, miR-28-5p, miR-135a-5p, miR-144, miR-331-3p, miR-100-3p, miR-6740-5p, miR-181c-3p, miR-331-3p, miR-30a-5p, miR-758-5p, miR-6516-5p, miR-322-5p, miR-9-5p, miR-486-5p, novel\_121, miR-134-5p, miR-7641, novel\_79, miR-181b-5p, miR-450a-2-3p, miR-107, miR-664-3p, miR-339a, miR-3071-3p, miR-380-5p, miR-148b-5p, miR-29a-5p, novel\_39, miR-2284f, miR-30a-3p, miR-29b-2-5p, miR-181a-3p, miR-335-3p, miR-129b-5p, miR-489, miR-3082-5p, miR-499a-3p, miR-7857-3p, miR-203-3p, miR-10b, miR-664b, miR-7977, miR-211-5p, miR-499a-5p, miR-2447, miR-452-5p, miR-181d-5p, miR-9-5p, miR-142-3p, miR-9788-3p, miR-148b-5p, miR-455-3p, novel\_78, miR-409b, miR-2300a-5p, miR-1185-5p, miR-16b, miR-29b-1-5p, miR-3187-3p, miR-424-5p, miR-494-3p, miR-1388-3p, miR-744-3p, miR-345-5p, miR-339b, novel\_99, miR-1827, miR-30d-5p, miR-598-3p, miR-500a-3p, miR-499b-3p, miR-6516, miR-15b-5p, novel\_25, miR-204-3p, miR-216b-3p, miR-424-5p, miR-500, miR-874-5p, miR-708-5p, miR-208b-5p, miR-30a-3p, miR-20b-5p, miR-195a-5p, miR-497-5p, miR-2426, miR-101a-5p, miR-16b, miR-125b-2-3p, miR-3071-5p, miR-1a-3p, miR-21a-3p, miR-15b-5p, miR-15a-5p, miR-322-5p, miR-3120-3p, miR-3068-3p, miR-31-5p, miR-424-5p, miR-2285t, miR-206, miR-16b, miR-16a, miR-342, miR-15a, miR-2285b, miR-125b-2-3p, miR-206-3p, miR-16-5p, miR-1, miR-424-5p, miR-216c-5p, miR-342-3p

GKN1

ENSOARGO(gastroki

RSBN1

ENSOARGO(round sp

miR-2285b, miR-3529-3p, miR-30a-3p, miR-2385-3p, miR-6536, miR-200c-3p, miR-17-3p, miR-200a-3p, miR-200c, miR-505-5p, miR-582-3p, miR-429-3p, miR-2285ad, miR-300, miR-582-3p, miR-200b-3p, miR-3591-5p, miR-2427, miR-29d-3p, miR-1306-5p, miR-103b, miR-3607-3p, novel\_9, miR-410-5p, miR-29b-3p, miR-3969, miR-144, miR-300-3p, miR-376c-3p, miR-141-3p, miR-2285aa, miR-370-3p, miR-345-5p, miR-876-3p, miR-10b-3p, miR-671-5p, miR-1814c, miR-381-3p, miR-30e-5p, miR-3154, miR-200a-5p, miR-345-5p, miR-6240, miR-130b-5p, miR-2483-5p, miR-377-3p, miR-503-5p, miR-330-3p, miR-503-5p, miR-134-3p, miR-3431, miR-544b, miR-31-5p, miR-30b-3p, miR-29b, miR-2284x, miR-1434-3p, miR-1285, miR-653, miR-145a-5p, miR-3959-3p, miR-542-5p, miR-17-3p, miR-29c-3p, miR-495-3p, miR-2285x, miR-29a, miR-656-5p, miR-133a-5p, miR-3613, miR-29a-3p, miR-2404, miR-144-3p, miR-216b-3p, miR-3074-5p, miR-2285ab, miR-376c-3p, miR-130a-5p, miR-376a-5p, miR-503-5p, miR-216c-5p, miR-542-5p, miR-216a-5p, miR-200b, miR-7859, miR-1247-5p, miR-548e-3p, miR-30d-3p, miR-142-3p, let-7a-3p, miR-218-1-3p, novel\_133, miR-126-3p, miR-1197-5p, miR-98-3p, miR-124-3p, miR-98-3p, miR-145a-3p, miR-3074-5p, miR-3074-2-3p, miR-17-3p, miR-130b-5p, miR-487a-5p, miR-30e-3p, let-7b-3p, miR-320e, miR-324-3p, miR-30a-3p, miR-376e-3p, miR-544-3p, miR-582-5p, miR-377-3p, miR-204-3p, novel\_32, miR-2331-3p, miR-532-5p, miR-345-5p, miR-2312, miR-582-5p, miR-3613-5p, let-7f-1-3p, miR-433-3p, miR-129b-3p, miR-2310, miR-8485, miR-382-3p, miR-124a, miR-376b, miR-542-5p, miR-103a-2-5p, miR-153-3p, miR-147a, miR-153, novel\_4, miR-330-3p, miR-145b, miR-544a, miR-2426, miR-1388-5p, miR-484, miR-30b-3p, novel\_111, miR-154a, miR-2447, miR-2285f, miR-107-5p, miR-2285y, miR-3082-5p, miR-378g, miR-154-5p, miR-2310b, miR-544-5p, miR-100-5p, miR-135a-1-3p, miR-4492, miR-200a-3p, miR-2284m, miR-3958-5p, miR-2447, miR-200a, miR-23b-5p, miR-140-5p, miR-503-3p, miR-23a-5p, novel\_99, miR-410-5p, miR-2284ab, miR-141-3p, miR-140-5p, miR-204-3p, miR-2284n, miR-378g, miR-3431, miR-134-3p, miR-374c-3p

LRRRC58 ENSOARGO(leucine)

CNTN1 ENSOARGO(contactin)

miR-125a-5p, miR-146b, miR-491-5p, miR-483-3p, miR-29b-1-5p, miR-146a, miR-431-5p, miR-326, miR-654-3p, miR-378d, miR-432-3p, miR-3120-5p, miR-378c, miR-29b, miR-7857, miR-484, miR-378b, miR-9788-3p, miR-103, miR-2459, miR-1298-3p, miR-147a, miR-181b-2-3p, miR-103a-3p, novel\_4, miR-2284q, miR-29a, miR-326-3p, miR-2428, miR-29c-3p, miR-9-5p, miR-146b-5p, miR-378f, miR-6395, miR-135b-5p, miR-136-5p, miR-107, miR-150-5p, miR-18b, miR-677, miR-203-3p, miR-378e, novel\_69, miR-29a-3p, miR-7689-3p, novel\_68, miR-452-3p, miR-107, novel\_96, miR-2284m, miR-200c-3p, miR-760-3p, miR-191-3p, miR-125b, miR-422a, miR-2285af, novel\_17, miR-200c, miR-125a-3p, miR-146a-5p, miR-29b-1-5p, miR-664b-3p, miR-181a-2-3p, miR-361-5p, miR-29d-3p, miR-330-5p, miR-378a-3p, miR-5703, miR-140-3p, miR-378i, miR-328-3p, miR-9-5p, miR-378h, miR-483-3p, miR-431, miR-18b-5p, miR-429-3p, miR-4492, miR-324-3p, miR-125b-5p, miR-135a-5p, miR-29b-3p, miR-378c, miR-6525, miR-378c, miR-3184-3p, miR-23a-5p, miR-18a-5p, miR-3154, miR-18a, miR-133c, miR-154b-5p, miR-2284n, miR-125a, miR-1271, miR-552-3p, miR-378a-3p, miR-2331-3p, miR-2113, miR-196a-5p, miR-330-5p, miR-450b-5p, miR-664-5p, novel\_78, miR-330-3p, miR-340-3p, miR-18a-3p, miR-181b-2-3p, miR-3600, miR-1298-3p, miR-6516-5p, miR-1271-5p, miR-2459, miR-326, novel\_51, miR-330-3p, miR-30c-2-3p, miR-324-3p, miR-216a-5p, miR-196b-5p, novel\_127, miR-6240, miR-181b-1-3p, miR-30c-1-3p, miR-488-3p, miR-381-3p, miR-18a-3p, miR-96-5p, miR-874-3p, miR-20a-3p, miR-503-3p, miR-30c-1-3p, miR-2331-3p, miR-545-3p, miR-3120-3p, miR-2483-3p, miR-7857-3p, miR-27a-5p, miR-181b-3p, miR-677, miR-2440, novel\_82, miR-3604, novel\_9, miR-2285t, miR-208b-5p, miR-1296-5p, miR-1271, miR-326-3p

FSTL1 ENSOARGO(follista)

ITPR2 ENSOARGO(inositol)

|        |                    |                                                                                                                                                                                                                                                                                                                                                                                                                                                                                                                                                                                                                                                                                                                                                                                                                                                                                                                                                                                                                                                                                                                                                                                                                                                                                                                                                                                                                                                                                                                                                                                                                                                                                                                                                                                                                                         |
|--------|--------------------|-----------------------------------------------------------------------------------------------------------------------------------------------------------------------------------------------------------------------------------------------------------------------------------------------------------------------------------------------------------------------------------------------------------------------------------------------------------------------------------------------------------------------------------------------------------------------------------------------------------------------------------------------------------------------------------------------------------------------------------------------------------------------------------------------------------------------------------------------------------------------------------------------------------------------------------------------------------------------------------------------------------------------------------------------------------------------------------------------------------------------------------------------------------------------------------------------------------------------------------------------------------------------------------------------------------------------------------------------------------------------------------------------------------------------------------------------------------------------------------------------------------------------------------------------------------------------------------------------------------------------------------------------------------------------------------------------------------------------------------------------------------------------------------------------------------------------------------------|
|        |                    | miR-877-3p, miR-96-5p, miR-7977, miR-4792, miR-652-3p, miR-378g, miR-3596, miR-4726-5p, miR-2285f, miR-541-3p, miR-2447, miR-541, miR-101c, miR-330-3p, miR-1343-3p, miR-2300a-5p, miR-16b, miR-5126, miR-1306-5p, miR-326, miR-320b, miR-25-5p, miR-491-5p, miR-424-5p, miR-8485, miR-30c-1-3p, let-7g-3p, miR-2312, miR-370-5p, miR-21-3p, novel_107, miR-30c-1-3p, miR-2331-3p, miR-15b-5p, miR-22-3p, miR-204-3p, miR-132-5p, miR-2284s, miR-4492, miR-424-5p, miR-3958-5p, miR-1271, miR-338-3p, miR-6525, miR-1197-5p, miR-5703, miR-2300b-3p, novel_133, miR-19b-3p, miR-4429, miR-184-3p, miR-212-5p, miR-18a-3p, miR-15a-5p, miR-185-3p, miR-324-3p, novel_17, miR-30b-3p, miR-320d, miR-486-3p, miR-130a-5p, miR-377-5p, miR-3591-3p, miR-18a-3p, miR-3970, miR-1306, miR-3141, miR-2387, miR-2285ab, miR-195a-5p, miR-19a-3p, miR-410-5p, miR-320b, miR-320c, miR-669, miR-6535, miR-670-3p, miR-29a-3p, miR-16a, miR-2284o, miR-15a, miR-29a, miR-1193, miR-29c-3p, miR-326-3p, miR-22-3p, miR-497-5p, miR-29b, miR-16b, miR-377-5p, miR-134-3p, novel_51, miR-330-3p, miR-3141, miR-1343-5p, miR-6240, miR-432-3p, miR-2284l, miR-2285r, miR-320a, miR-1248, miR-485-5p, miR-876-3p, miR-615-5p, miR-324-5p, miR-331-3p, miR-135a-1-3p, miR-370-5p, novel_63, miR-2433, miR-29b-3p, miR-486b-3p, miR-3432a, miR-16-5p, miR-330-5p, miR-29d-3p, miR-1343-5p, miR-3591-5p, miR-1271-5p, miR-505-5p, miR-322-5p, miR-30c-2-3p, miR-6119-5p, miR-125a-3p, novel_96, novel_127, miR-2284f, miR-3529-3p, miR-490-3p, miR-2285b, miR-6516-3p, miR-656-5p, miR-490-5p, miR-181a-2-3p, miR-665-5p, miR-744-3p, miR-193a-5p, miR-345-5p, miR-2411, miR-1843b-5p, miR-1434-3p, miR-1246, miR-23b-5p, miR-345-5p, miR-345-5p, novel_99, miR-543-3p, miR-23a-5p, novel_4, miR-1298-3p, miR-2483-3p, miR-2411-5p, miR-203-3p, miR-532-3p |
| ATG9A  | ENSOARGO( autophag |                                                                                                                                                                                                                                                                                                                                                                                                                                                                                                                                                                                                                                                                                                                                                                                                                                                                                                                                                                                                                                                                                                                                                                                                                                                                                                                                                                                                                                                                                                                                                                                                                                                                                                                                                                                                                                         |
| OLFML3 | ENSOARGO( olfactom |                                                                                                                                                                                                                                                                                                                                                                                                                                                                                                                                                                                                                                                                                                                                                                                                                                                                                                                                                                                                                                                                                                                                                                                                                                                                                                                                                                                                                                                                                                                                                                                                                                                                                                                                                                                                                                         |

miR-127-5p, let-7f-5p, novel\_127, novel\_96, miR-92b-3p, miR-148b-5p, miR-2285b, miR-29a-5p, let-7g, miR-3064-5p, miR-23b-5p, miR-1343-5p, miR-129-1-3p, novel\_121, miR-450a-1-3p, miR-6517, miR-299a-3p, miR-2285ad, miR-1224-5p, novel\_79, miR-3432a, miR-100-3p, miR-1260b, miR-193a-5p, miR-345-5p, miR-876-3p, miR-1248, miR-301, miR-3959-5p, miR-25-3p, miR-376c-3p, miR-503-3p, miR-874-3p, miR-3956, miR-2285aa, miR-193a-3p, novel\_51, miR-105-5p, miR-32, miR-3141, miR-493-5p, miR-188-5p, miR-27b-3p, miR-4508, miR-1843b-5p, miR-223-3p, miR-432, miR-450c-3p, miR-134-3p, miR-3431, miR-412-5p, miR-3535, miR-149-5p, miR-31-5p, miR-339-5p, miR-4324, miR-193b-3p, miR-412-3p, miR-410-5p, let-7e-5p, miR-378f, miR-2319a, miR-3141, miR-3970, miR-150-5p, miR-299b-3p, novel\_69, miR-374c-3p, miR-320c, miR-669, miR-3074-5p, novel\_68, miR-98-5p, miR-202-5p, let-7k, novel\_17, miR-122-3p, miR-422a, miR-324-3p, miR-377-5p, miR-376c-3p, miR-380-3p, miR-143-3p, miR-184-3p, miR-34a-5p, miR-218-1-3p, miR-196l, miR-378i, miR-378a-3p, miR-1247-5p, miR-18a-3p, miR-487b-5p, miR-130b-5p, miR-874-5p, miR-4492, miR-129-5p, let-7f, miR-15b-3p, miR-664a-5p, miR-346, miR-3184-5p, miR-122-5p, miR-129-2-3p, miR-3074-5p, let-7b, miR-665-5p, miR-214, miR-3958-5p, miR-345-5p, miR-339b, miR-1827, miR-450a-1-3p, miR-129b-3p, miR-376e-3p, miR-10a, let-7i-5p, miR-30c-1-3p, miR-32-5p, miR-216b-3p, miR-491-5p, miR-214-3p, miR-323b-3p, miR-29b-1-5p, miR-378d, miR-2310, miR-127-3p, miR-1388-3p, miR-1388-5p, miR-541, miR-323b, miR-1298-3p, miR-425-3p, miR-1185-3p, miR-455-3p, miR-148b-5p, miR-1343-3p, miR-490-5p, novel\_82, miR-877-3p, miR-361-3p, miR-423-5p, miR-3956-3p, miR-363-3p, miR-2447, let-7i-3p, miR-299b-5p, miR-99b-5p, miR-96-5p, miR-1983, miR-493-5p, miR-378g, miR-1185-2-3p, miR-202-3p, miR-2310k, miR-211-5p, miR-2285u, miR-664a, miR-1-5p, miR-551b-3p, miR-769-5p, miR-6740-5p, miR-500b-5p, miR-769-5p, miR-362-5p, miR-6525, miR-24-3p, miR-1197-3p, miR-6134, miR-2447, miR-1a-1-5p, miR-4510, miR-1291, miR-485-5p, miR-3141, miR-362-5p, miR-6130, miR-3082-5p, miR-769, miR-204-3p, miR-6535, miR-221-5p, miR-3064-5p, miR-320b, miR-2285aa, miR-7977, miR-3085-3p, miR-450a-2-3p, miR-491-5p, miR-2898, miR-1a-2-5p, miR-1343-5p, miR-221-5p, novel\_96, miR-503-5p, miR-3141, miR-148b-5p, miR-1b-5p, miR-1388-3p, miR-2330-5p, miR-503-5p, miR-3064-5p, miR-2426, miR-296-5p, miR-193b-5p, miR-1343-5p, miR-5703, miR-503-5p, miR-9788-3p, miR-194-3p, miR-500-5p, miR-149-5p, miR-1224-5p, miR-212-5p, miR-299, miR-224-5p, miR-2285j, miR-193b-5p, miR-409-3p, miR-625-5p, miR-485-5p, miR-2447, miR-2319b, miR-6527, miR-24-3p, miR-224-5p, miR-125b-2-3p, miR-204-3p

miR-450c-3p, miR-1434-3p, miR-708-3p, miR-1260b, miR-21-5p, miR-26b-3p, miR-130a-3p, miR-31-5p, miR-149-5p, miR-134-3p, miR-185-5p, miR-3431, novel\_51, miR-330-3p, miR-3141, miR-466f-3p, miR-660, miR-1343-5p, miR-628-5p, miR-6240, miR-130b-5p, let-7a-2-3p, miR-21c, miR-3065-5p, miR-3141, miR-1291, miR-3120-3p, miR-3074-5p, miR-363, novel\_68, miR-181b-3p, miR-144-3p, miR-677, miR-6535, miR-299b-3p, miR-425-5p, miR-142b, miR-147-5p, miR-22-5p, miR-206, miR-2285x, miR-17-3p, miR-1a-1-5p, miR-335-5p, miR-342-3p, novel\_120, miR-219b-3p, miR-301b-3p, miR-2285m, novel\_27, miR-371b-3p, miR-24-3p, miR-211, miR-1343-5p, miR-2427, let-7a-2-3p, miR-155-5p, miR-200b-3p, miR-6517, miR-429-3p, miR-299a-3p, miR-222, miR-2285ad, miR-450a-1-3p, miR-758-5p, miR-2411-5p, miR-302a-5p, miR-505-5p, miR-217, miR-30c-2-3p, miR-30f, miR-125a-3p, miR-200c, miR-219-3p, miR-2285af, miR-1260a, novel\_96, miR-200c-3p, miR-1a-2-3p, miR-17-3p, miR-1, miR-29b-2-5p, miR-3064-5p, miR-450c-5p, miR-3065-3p, miR-2478, miR-3154, miR-331-5p, miR-424-3p, miR-485-5p, miR-1814c, miR-23a-5p, miR-7144-5p, let-7g-3p, miR-876-3p, miR-370-3p, miR-3068-3p, miR-376c-3p, miR-133c, miR-3965, miR-144, miR-6740-5p, miR-331-3p, miR-34c-3p, miR-551b-3p, miR-2433, miR-1-5p, miR-486b-3p, miR-191-5p, miR-204-5p, miR-331-5p, miR-133a-3p, miR-103b, novel\_42, miR-1306-5p, miR-145-3p, miR-1260b, miR-1a-3p, miR-2426, miR-450b-5p, miR-181b-2-3p, miR-330-3p, novel\_4, miR-221-3p, miR-1298-3p, miR-29b-1-5p, miR-5126, novel\_103, miR-342, miR-214-3p, miR-25-5p, miR-130b-3p, miR-3085-3p, novel\_124, miR-491-5p, let-7c-3p, miR-382-3p, miR-127-3p, miR-2330-5p, miR-124a, miR-2310, miR-1b-5p, miR-8485, miR-4532, miR-30c-1-3p, miR-381-3p, miR-221, miR-361-3p, novel\_94, miR-136-5p, miR-7977, miR-211-5p, miR-20a-3p, miR-452-3p, miR-3064-5p, miR-139-5p, miR-378c, miR-7857, miR-130a-3p, miR-222, miR-221-3p, miR-450a-1-3p, miR-2411-5p, miR-539-5p, miR-450c-3p, miR-140-3p, miR-1388-5p, miR-19b-3p, miR-493-5p, miR-2411, miR-205-5p, miR-3653-3p, miR-130b-3p, miR-370-5p, miR-2285aa, miR-3120-3p, miR-140-5p, miR-301a-3p, miR-2404, miR-3082-5p, miR-381-3p, miR-3065-5p, miR-21a-3p, miR-221, miR-450a-1-3p, miR-493-5p, miR-543-3p, novel\_99, miR-450b-3p, let-7g-3p, miR-19a-3p, miR-2318, miR-6128, miR-3074-2-3p, miR-103b, miR-1193, miR-452-5p, miR-301b-3p, miR-374a-3p, miR-206-3p, miR-338-5p, miR-382-5p, miR-222-3p, miR-370-5p, miR-133a-5p, miR-142b, miR-374a-3p, miR-454-3p, miR-374b-3p, miR-450b-3p, miR-206, miR-365b-5p, miR-330-3p, miR-324-3p, miR-2957, miR-339a, miR-376b-3p, miR-199a-3p, miR-2284m, miR-652-5p, miR-33a-5p, miR-6240, miR-125b-2-3p, miR-181b-1-3p, miR-22-3p, miR-1197-5p, miR-145a-5p, miR-1246, miR-215-5p, miR-2284x, miR-339-5p, novel\_79, miR-145b, miR-181b-2-3p, miR-330-3p, miR-1343-3p, miR-199a-3p, miR-328-3p, miR-376b-3p, miR-222-5p, miR-1298-3p, miR-2284k, miR-374a-3p, miR-204-5p, miR-3958-5p, miR-103b, miR-2284j, miR-2447, miR-3059-5p, miR-145a-3p, miR-365a-5p, miR-211, miR-877-3p, miR-129b-5p, miR-376b-3p, miR-376a-3p, miR-6395, miR-671-5p, miR-410-5p, miR-339b, miR-211-5p, miR-215-5p, miR-452-3p, miR-204-3p, miR-677, miR-22-3p, miR-376d, miR-181b-3p, miR-192-5p

MEIS1 ENSOARGO(Meis hom

LRRK2 ENSOARGO(leucine-

RHBDL2 ENSOARGO(rhomboid

miR-3074-5p, miR-329-5p, miR-144-3p, miR-320c, miR-29a-3p, miR-374c-3p, miR-146b-3p, miR-18a-3p, miR-3065-5p, miR-3591-3p, miR-3141, miR-2387, miR-148a-3p, miR-2285ab, miR-376b-5p, miR-379-5p, miR-195a-5p, miR-107, miR-19a-3p, miR-29c-3p, miR-1193, miR-301b-3p, miR-382-5p, miR-16a, miR-15a, miR-29a, miR-130a-3p, miR-103a-3p, miR-31-5p, miR-103, miR-2355-3p, miR-3535, miR-374b-3p, miR-542-3p, miR-27b-3p, miR-455-5p, miR-497-5p, miR-1260b, miR-16b, miR-29b, miR-6240, miR-455-5p, novel\_51, miR-330-3p, miR-3141, miR-197-5p, miR-483-3p, miR-1271, miR-370-3p, miR-2285aa, miR-223-5p, miR-23b, miR-376c-5p, miR-320a, miR-301, miR-381-3p, miR-30e-5p, miR-488-3p, miR-376c-5p, miR-7144-5p, miR-16-5p, miR-1260b, miR-144, miR-370-5p, miR-29b-3p, miR-374b-3p, miR-429-3p, novel\_121, miR-545-5p, miR-483-3p, miR-9-5p, miR-322-5p, miR-30a-5p, miR-29d-3p, miR-30c, miR-155-5p, miR-300, miR-3529-3p, miR-376c-5p, miR-3065-3p, miR-2478, miR-1260a, novel\_127, miR-152-3p, miR-107, miR-7689-3p, miR-2319b, miR-27a-3p, miR-499a-3p, miR-378j, miR-140-5p, miR-9-5p, miR-2285f, miR-423-5p, miR-30b-5p, miR-382-3p, miR-3968, miR-27a-3p, miR-330-3p, miR-1343-3p, miR-9788-3p, miR-455-3p, miR-216a-3p, miR-4791, miR-143-5p, miR-296-5p, miR-3120-5p, miR-101a-5p, miR-1388-5p, miR-652-5p, miR-23a-3p, miR-382-3p, miR-101b-3p, miR-424-5p, miR-3187-3p, miR-16b, miR-320b, miR-130b-3p, miR-21-3p, miR-370-5p, miR-3065-3p, miR-155-5p, miR-15b-5p, miR-301a-3p, miR-499b-3p, miR-2284s, miR-487b-5p, miR-30d-5p, miR-27b-5p, miR-21a-3p, miR-30f, miR-2312, miR-3074-5p, miR-539-5p, miR-3184-5p, miR-320e, miR-424-5p, miR-454-3p, miR-487b-5p, miR-155-5p, miR-3600, miR-548e-3p, miR-18a-3p, miR-532-3p, miR-616-3p, miR-23c, miR-148b-3p, miR-15a-5p, miR-23b-3p, miR-1434-5p, miR-140-3p, miR-30c-5p, miR-10b-3p, miR-142-3p, miR-1129, miR-30e-5p, miR-30d-5p, let-7g-3p, miR-876-3p, miR-154b-3p, miR-487a-3p, miR-363, miR-154a-3p, miR-6130, novel\_25, miR-30b-5p, miR-92a-3p, miR-154-3p, miR-363-3p, miR-4510, miR-495-3p, miR-30c-5p, miR-2408, miR-124-3p, miR-30a-5p, miR-380-3p, miR-30c, miR-340-5p, miR-30b, miR-2285af, miR-29b-1-5p, miR-30d, miR-92a-3p, miR-124a, miR-487a, let-7c-3p, miR-29b-1-5p, miR-29a, miR-29b-2-5p, miR-107-5p, miR-125b-5p, miR-29b-3p, novel\_63, miR-222-3p, miR-2284w, miR-9-3p, miR-3959-3p, miR-29c-3p, miR-4510, miR-129-2-3p, miR-1248, miR-9-3p, miR-23b, miR-221, miR-454-5p, miR-374c-3p, miR-29a-3p, miR-6130, miR-125a, novel\_68, miR-103a-2-5p, miR-125a-5p, miR-125b, miR-654-3p, miR-345-3p, miR-23a-3p, miR-29b-2-5p, miR-195a-3p, miR-184-3p, novel\_73, miR-450b-5p, miR-29b, miR-3071-5p, miR-374b-3p, miR-2427, miR-29d-3p, miR-1843b-5p, miR-1298-5p, miR-129-1-3p, miR-421, miR-221-3p, miR-23c, miR-23b-3p, miR-7641, miR-222, miR-487b-5p, miR-300, miR-3653-3p, miR-877-3p, miR-299-3p, miR-381-3p, miR-377-3p, miR-3154, miR-377-3p, miR-299b-3p, miR-8485, miR-203-3p, miR-299a-3p, miR-539-5p, miR-382



miR-101-3p, miR-490-5p, miR-2285f, miR-452-5p, miR-181d-5p, miR-219a-5p, miR-1285-5p, miR-219a-2-3p, miR-129b-5p, miR-140-5p, miR-9-3p, miR-2285u, miR-374b-5p, miR-211-5p, miR-664b, miR-20a-3p, miR-452-3p, miR-144-5p, miR-203-3p, let-7d-5p, miR-27a-3p, miR-7857-3p, miR-3082-5p, miR-2483-3p, miR-323b-3p, miR-182-5p, miR-199a-3p, miR-320b, let-7e, miR-542-5p, miR-1185-5p, miR-491-5p, miR-124a, let-7a-5p, miR-101b-3p, miR-382-3p, miR-193a, miR-3187-3p, miR-2310, miR-758-3p, miR-30c-1-3p, miR-3962, miR-30b-3p, miR-758-3p, miR-1839-5p, miR-21b, miR-101c, miR-2426, miR-5010-3p, miR-181b-2-3p, miR-27a-3p, miR-409b, miR-199b-3p, miR-105-1, miR-151a-3p, miR-330-3p, miR-455-3p, miR-421, miR-147a, miR-219b-3p, miR-132-5p, miR-151-3p, miR-338-5p, miR-3604, miR-2285j, let-7f, miR-129-5p, miR-4492, miR-450b-3p, novel\_74, miR-6516-3p, miR-425-5p, let-7b, let-7b-5p, miR-338-3p, miR-181c-5p, miR-6134, miR-6525, miR-129b-3p, miR-433-3p, miR-411, miR-299, miR-21a-3p, miR-450a-1-3p, miR-186-5p, miR-2312, miR-345-5p, miR-182-5p, miR-532-5p, miR-221-5p, miR-30c-1-3p, miR-2331-3p, novel\_25, miR-877-5p, let-7i-5p, miR-216a-5p, miR-185-3p, miR-345-3p, miR-196a-3p, miR-374a-5p, miR-2285p, miR-618, miR-542-5p, miR-221-5p, miR-34b-5p, let-7k, miR-299-3p, miR-320d, miR-2284m, miR-98-5p, miR-486-3p, miR-2424, miR-143-3p, miR-181b-1-3p, miR-124-3p, miR-5703, miR-1961, miR-2300b-3p, miR-218-1-3p, miR-34a-5p, miR-33b-3p, miR-4429, miR-3600, miR-212-5p, miR-548e-3p, miR-199a-3p, miR-7859, miR-340-5p, miR-200b, miR-34c, let-7i, miR-656-5p, miR-199c, novel\_1, miR-495-3p, miR-542-5p, miR-2285x, novel\_120, novel\_27, miR-374c-5p, miR-449a, miR-2284w, miR-2428, miR-211, miR-3959-3p, miR-2285ab, miR-9851-3p, let-7e-5p, miR-135b-5p, miR-450b-3p, miR-3120-3p, miR-378b, miR-320c, miR-677, miR-181b-3p, miR-2404, miR-299b-

miR-451a, miR-155-5p, miR-424-5p, miR-30e-3p, miR-151-3p, miR-30a-3p, miR-665, miR-6525, miR-224-5p, miR-206-3p, miR-3958-5p, miR-214, miR-2330-3p, let-7g-3p, miR-625-5p, miR-598-3p, miR-377-3p, miR-27a-5p, novel\_25, miR-15b-5p, miR-155-5p, miR-140-5p, miR-532-5p, miR-552-3p, miR-2284m, miR-320d, miR-21-3p, miR-2484, miR-196a-3p, miR-216a-5p, miR-500a-5p, miR-664b-3p, miR-2432, miR-146a-5p, miR-183-5p, miR-216c-5p, miR-2285w, miR-19b-3p, miR-4429, miR-33b-3p, miR-2904, miR-188-3p, miR-1197-5p, miR-217-5p, miR-15a-5p, miR-1247-5p, miR-2284h-5p, miR-532-3p, miR-18a-3p, miR-30d-3p, miR-3958-3p, miR-4726-5p, miR-2284q, miR-301a-5p, miR-362-5p, miR-1285-5p, miR-3059-5p, novel\_60, miR-3956-3p, miR-452-5p, miR-194b-5p, miR-2284j, miR-136-5p, miR-877-3p, miR-199b-5p, miR-499a-3p, miR-378g, miR-2483-3p, miR-203-3p, miR-652-3p, miR-24-1-5p, miR-20a-3p, miR-2319b, novel\_124, miR-146b, miR-199b-5p, miR-214-3p, miR-320b, novel\_103, miR-326, miR-2957, miR-16b, miR-193a, miR-758-3p, miR-424-5p, miR-2426, miR-2284aa, miR-484, miR-301b-5p, miR-412-3p, miR-1a-3p, miR-758-3p, miR-500-5p, miR-330-3p, miR-151a-3p, miR-410-3p, miR-374b-3p, miR-2284k, miR-500b-5p, miR-1306-5p, miR-28a-3p, miR-3607-3p, miR-16-5p, let-7g-3p, miR-376c-5p, miR-376c-5p, miR-362-5p, miR-320a, miR-374c-3p, miR-199a-5p, miR-2284n, miR-3068-3p, miR-542-5p, miR-598-3p, miR-141-3p, miR-28-3p, miR-191-3p, miR-107, novel\_127, miR-200a-3p, miR-2285af, miR-2478, miR-24-2-5p, miR-199a-5p, miR-376c-5p, miR-376b-5p, miR-2285b, miR-1271-3p, miR-30a-3p, miR-1, miR-4286, miR-155-5p, let-7a-2-3p, miR-1290, miR-330-5p, miR-24-2-5p, miR-322-5p, miR-2284z, miR-486-5p, miR-412, miR-6119-3p, miR-206, miR-203b-5p, miR-656-5p, miR-15a, miR-16a, miR-382-5p, miR-326-3p, miR-199b-5p, miR-135a-2-3p, miR-2285x, novel\_101, miR-410-5p, miR-19a-3p, miR-107, miR-146b-5p, miR-195a-5p, miR-376b-5p, miR-211-5p, miR-6527, miR-6240, miR-548o-3p, miR-330-3p, miR-548e-3p, miR-374c-3p, miR-211, miR-330-3p, miR-129b-3p, miR-2387, miR-204-5p, miR-188-5p, miR-129-5p, miR-21-5p, miR-450b-3p, miR-29b-2-5p, miR-6134, miR-1197-3p, miR-1814c, miR-376c-5p, let-7g-3p, miR-329b, miR-30f, miR-2318, let-7g-3p, miR-30d-5p, miR-376c-5p, miR-129b-3p, miR-301, miR-450a-1-3p, miR-30e-5p, miR-488-3p, miR-877-5p, miR-2284s, miR-331-5p, miR-21-3p, miR-3068-3p, miR-543-5p, miR-30d, miR-185-3p, miR-2285b, miR-376c-5p, miR-2432, miR-130a-5p, miR-4286, miR-29b-2-5p, miR-183-5p, let-7a-2-3p, miR-30a-5p, miR-376a-5p, miR-30c-5p, miR-450a-1-3p, miR-340-5p, miR-9-5p, miR-7641, miR-147-5p, miR-382-5p, miR-7705, miR-2284w, miR-452-5p, novel\_101, miR-9-5p, miR-1296-5p, miR-3059-5p, novel\_120, miR-378b, miR-378j, miR-3591-3p, miR-3970, miR-376b-5p, miR-27a-3p, miR-655-5p, miR-2319b, let-7a-2-3p, miR-2310, miR-3187-3p, miR-1388-3p, miR-27b-3p, miR-21b, miR-30b-3p, novel\_23, miR-145a-5p, miR-30b-3p, miR-450c-3p, miR-2284r, miR-27a-3p, miR-145b

AMPD1 ENSOARGO(adenosin

PELI1 ENSOARGO(pellino

RASGRP1 ENSOARGO(RAS guan

|        |                   |                                                                                                                                                                                                                                                                                                                                                                                                                                                                                                                                                                                                                                                                                                                                                                                                                                                                                                                                                                                                                                                                                                                                                                                                                                                                                                                                                                                                                                                                                                                                                                                                                                                                                                                                                                                                                                                                                                                                                                                                                                                                                                                                                                                               |
|--------|-------------------|-----------------------------------------------------------------------------------------------------------------------------------------------------------------------------------------------------------------------------------------------------------------------------------------------------------------------------------------------------------------------------------------------------------------------------------------------------------------------------------------------------------------------------------------------------------------------------------------------------------------------------------------------------------------------------------------------------------------------------------------------------------------------------------------------------------------------------------------------------------------------------------------------------------------------------------------------------------------------------------------------------------------------------------------------------------------------------------------------------------------------------------------------------------------------------------------------------------------------------------------------------------------------------------------------------------------------------------------------------------------------------------------------------------------------------------------------------------------------------------------------------------------------------------------------------------------------------------------------------------------------------------------------------------------------------------------------------------------------------------------------------------------------------------------------------------------------------------------------------------------------------------------------------------------------------------------------------------------------------------------------------------------------------------------------------------------------------------------------------------------------------------------------------------------------------------------------|
|        |                   | miR-6134, miR-338-3p, miR-122-5p, miR-2330-3p, miR-3074-5p, miR-874-5p, miR-424-5p, miR-708-5p, miR-454-3p, miR-3604, miR-665, miR-30a-3p, miR-2285j, miR-15b-5p, miR-22-3p, miR-192-5p, miR-301a-3p, miR-377-3p, miR-296-3p, miR-532-5p, miR-182-5p, miR-21-3p, miR-660-5p, miR-625-5p, miR-433-3p, miR-143-3p, miR-486-3p, miR-146a-5p, miR-125b-2-3p, miR-20a, miR-2285w, miR-216c-5p, miR-21-3p, miR-760-3p, miR-2284m, miR-106a, miR-92a-1-5p, miR-216a-5p, miR-324-3p, miR-374a-5p, miR-618, miR-2284h-5p, miR-15a-5p, miR-148b-3p, miR-30d-3p, miR-3600, miR-1b-3p, miR-106a, miR-16-1-3p, miR-142-3p, miR-1197-5p, miR-5703, miR-140-3p, miR-376a-5p, miR-215-5p, miR-154a, miR-361-3p, miR-2284j, miR-194b-5p, miR-9-5p, miR-1296-5p, miR-3059-5p, miR-2285t, miR-335, miR-499a-5p, miR-107-5p, miR-2285y, miR-371a-5p, miR-2440, miR-2285n, miR-1185-2-3p, miR-27a-3p, miR-3082-5p, miR-2483-3p, miR-7977, miR-499b-5p, miR-374b-5p, miR-452-3p, novel_94, miR-544-5p, miR-335-3p, miR-136-5p, miR-181a-3p, miR-361-3p, miR-1b-5p, miR-3187-3p, miR-106a-5p, miR-1839-3p, miR-424-5p, miR-494-3p, miR-103a-2-5p, miR-146b, miR-130b-3p, miR-106b-5p, miR-16b, miR-182-5p, novel_103, miR-1306-5p, miR-326, miR-342, miR-1185-3p, miR-421, miR-9788-3p, miR-455-3p, miR-147a, miR-145b, miR-27a-3p, novel_78, miR-330-3p, miR-3120-5p, miR-16-2-3p, miR-101c, miR-2284aa, miR-2426, miR-6529a, miR-181c-3p, miR-93, miR-103b, miR-16-5p, miR-6128, miR-2284v, miR-374b, miR-28a-3p, miR-486b-3p, miR-28-5p, miR-767-5p, miR-138-5p, miR-6740-5p, miR-2284k, novel_63, miR-2284n, miR-300-3p, miR-215-5p, miR-1271, miR-141-3p, miR-370-3p, miR-3068-3p, miR-7144-5p, miR-20b-5p, miR-767, miR-3154, miR-17-5p, miR-93-5p, miR-301, miR-200a, miR-29a-5p, miR-450b-5p, miR-148b-5p, miR-30a-3p, miR-543-5p, miR-152-3p, miR-200a-3p, miR-107, miR-28-3p, miR-301b-3p, miR-1193, miR-29c-3p, miR-9-5p, miR-454-3p, miR-29a, miR-130b-3p, miR-219b-5p, novel_87, miR-410-5p, miR-29b-3p, miR-370-5p, miR-142b, miR-421, miR-301a-3p, miR-9-5p, miR-29a-3p, miR-130a-3p, miR-655-5p, miR-370-5p, miR-532-5p, miR-505-3p, miR-452-3p, novel_94, miR-1248, miR-505-3p, miR-29b, miR-29d-3p |
| PABPC4 | ENSOARGO(poly(A)  |                                                                                                                                                                                                                                                                                                                                                                                                                                                                                                                                                                                                                                                                                                                                                                                                                                                                                                                                                                                                                                                                                                                                                                                                                                                                                                                                                                                                                                                                                                                                                                                                                                                                                                                                                                                                                                                                                                                                                                                                                                                                                                                                                                                               |
| WDPCP  | ENSOARGO(WD repea | miR-27a-3p, miR-29a-3p, miR-141-3p, miR-3120-3p, miR-2285u, miR-3065-3p, miR-2319b, miR-3064-5p, novel_99, miR-543-3p, miR-345-5p, miR-345-5p, miR-361-3p, miR-488-3p, miR-21a-3p, miR-2284w, miR-181c-5p, miR-1285-5p, miR-29c-3p, miR-181d-5p, miR-29a, novel_87, miR-30a-3p, miR-101-3p, miR-30e-3p, miR-29b-3p, miR-2285j, miR-9788-3p, miR-1298-3p, miR-30d-3p, miR-145b, miR-27a-3p, miR-3600, miR-330-3p, miR-2300a-5p, miR-27b-3p, miR-101c, miR-582-3p, miR-29b, miR-1388-5p, miR-140-3p, miR-145a-5p, miR-125b-2-3p, miR-29d-3p, miR-181a-5p, miR-484, miR-345-5p, miR-296-3p, miR-3065-3p, miR-29a-5p, miR-2424, miR-30a-3p, miR-2385-3p, miR-3064-5p, miR-6240, miR-200a-3p, miR-181b-5p, miR-3085-3p, miR-330-3p, miR-296-3p                                                                                                                                                                                                                                                                                                                                                                                                                                                                                                                                                                                                                                                                                                                                                                                                                                                                                                                                                                                                                                                                                                                                                                                                                                                                                                                                                                                                                                                     |
| RPL17  | ENSOARGO(ribosoma | miR-21a-3p, miR-376a-5p, miR-125b-2-3p, miR-219a-5p, miR-376a-5p, miR-126a-5p                                                                                                                                                                                                                                                                                                                                                                                                                                                                                                                                                                                                                                                                                                                                                                                                                                                                                                                                                                                                                                                                                                                                                                                                                                                                                                                                                                                                                                                                                                                                                                                                                                                                                                                                                                                                                                                                                                                                                                                                                                                                                                                 |
| MDH1   | ENSOARGO(malate d |                                                                                                                                                                                                                                                                                                                                                                                                                                                                                                                                                                                                                                                                                                                                                                                                                                                                                                                                                                                                                                                                                                                                                                                                                                                                                                                                                                                                                                                                                                                                                                                                                                                                                                                                                                                                                                                                                                                                                                                                                                                                                                                                                                                               |

miR-6516-5p, miR-1271-5p, miR-322-5p, miR-214-5p, miR-429-3p, miR-6517, miR-431, miR-7641, miR-300, miR-582-3p, miR-200b-3p, miR-196a-5p, miR-23b-5p, miR-330-5p, miR-218-2-3p, miR-24-2-5p, miR-2478, miR-29a-5p, miR-200a, miR-1, miR-29b-2-5p, miR-6536, miR-200c-3p, miR-107, miR-200c, miR-1260a, miR-30c-2-3p, miR-3071-3p, miR-331-5p, miR-374c-3p, miR-300-3p, miR-376c-3p, miR-99a-3p, miR-2355-5p, miR-1248, miR-671-5p, miR-23a-5p, miR-7144-5p, miR-301, miR-331-5p, miR-381-3p, miR-320a, miR-137-3p, miR-200a-5p, miR-1260b, miR-374a-3p, miR-16-5p, miR-3607-3p, miR-331-5p, miR-374b-3p, miR-204-5p, miR-410-3p, miR-99b-3p, miR-135a-1-3p, miR-5100, miR-34c-3p, miR-135a-5p, miR-409-3p, miR-544b, miR-103, miR-2355-3p, miR-149-5p, miR-103a-3p, miR-3955-5p, miR-26b-3p, miR-1260b, miR-16b, miR-497-5p, miR-19b-2-5p, miR-145a-5p, miR-432-3p, miR-654-3p, miR-432-3p, miR-493-5p, miR-130b-5p, miR-196b-5p, miR-124-5p, miR-193a-3p, novel\_51, miR-374c-3p, miR-320c, novel\_68, miR-320b, miR-107, miR-135b-5p, miR-6395, miR-195a-5p, miR-7975, miR-3591-3p, miR-3065-5p, miR-3970, miR-150-5p, miR-1306, miR-211, miR-326-3p, miR-193b-3p, miR-206, miR-6119-3p, miR-502-5p, miR-15a, novel\_87, miR-16a, miR-200b, miR-15a-5p, miR-328-3p, miR-2284h-5p, miR-532-3p, miR-616-3p, miR-1b-3p, miR-4429, miR-378d, miR-2284u, miR-148a-5p, miR-2366, novel\_133, miR-1197-5p, miR-1434-5p, miR-188-3p, miR-140-3p, miR-376c-3p, miR-130a-5p, miR-29b-1-5p, miR-2285w, miR-99a-3p, miR-320d, miR-21-3p, miR-500a-5p, miR-193b-3p, miR-544-3p, miR-6516, miR-15b-5p, miR-204-3p, miR-140-5p, miR-545-3p, miR-30c-1-3p, miR-21-3p, let-7g-3p, novel\_99, miR-206-3p, miR-338-3p, miR-590-3p, miR-2330-3p, miR-425-5p, miR-1271, miR-487b-5p, miR-130b-5p, miR-874-5p, miR-487a-5p, miR-424-5p, miR-2285j, miR-29b-2-5p, miR-664a-5p, miR-19b-1-5p, miR-151-3p, miR-421, miR-148b-5p, miR-

SYCP1      ENSOARGO(synapton

miR-211, miR-17-3p, miR-219b-3p, miR-656-5p, miR-128-1-5p, miR-33a-3p, let-7i, miR-382-5p, miR-20a-5p, miR-670-3p, miR-10a-5p, miR-7-1-3p, miR-378b, miR-9851-3p, miR-1291, miR-21c, miR-18a-3p, miR-378b, miR-2285ab, miR-654-3p, miR-130b-5p, miR-660, miR-125a-5p, miR-124-5p, miR-330-3p, miR-17-5p, miR-106a-5p, miR-503-5p, miR-6238, miR-20b, miR-2284d, miR-2285g, miR-503-5p, let-7g-5p, miR-138, miR-30b-3p, miR-2284ab, miR-145a-5p, miR-1434-3p, miR-365a-5p, miR-145-3p, miR-93, miR-374a-3p, miR-6128, miR-103b, miR-1306-5p, miR-204-5p, miR-374b-3p, miR-486b-3p, miR-138-5p, miR-2332, miR-2284n, miR-141-3p, miR-7144-5p, miR-1814c, miR-17-5p, miR-3154, miR-320a, miR-376c-5p, miR-376b-5p, miR-181a-2-3p, miR-543-5p, miR-17-3p, miR-339a, let-7c-5p, miR-545-5p, miR-6516-5p, miR-128-3p, miR-10a-5p, miR-582-3p, let-7d, miR-134, miR-2285f, miR-452-5p, novel\_60, miR-374a-3p, miR-4726-5p, miR-450a-5p, miR-335, miR-107-5p, let-7d-5p, miR-27a-3p, miR-3064-5p, miR-10b, miR-3187-3p, miR-376b, let-7a-5p, miR-2330-5p, miR-106a-5p, let-7e, miR-3085-3p, miR-25-5p, miR-320b, novel\_103, miR-1306-5p, miR-2285e, miR-142-3p, miR-27a-3p, novel\_4, miR-2284aa, miR-299a-5p, miR-412-3p, miR-7857, miR-30b-3p, miR-484, miR-143-5p, miR-10b, let-7b-5p, miR-6134, miR-10b-5p, miR-29c-5p, miR-3074-2-3p, miR-2330-3p, miR-487a-5p, miR-208b-5p, miR-17-3p, miR-6516-3p, miR-29d-5p, miR-320e, miR-22-3p, miR-6516, miR-27a-5p, miR-139-5p, miR-182-5p, miR-140-5p, miR-221-5p, miR-660-5p, miR-2312, miR-2432, miR-20a, miR-2887, miR-183-5p, miR-1277-5p, miR-221-5p, miR-299-3p, miR-106a, miR-320d, miR-185-3p, miR-125b, novel\_83, miR-199a-3p, miR-671-3p, miR-148b-3p, miR-548e-3p, miR-4429, miR-124-3p, miR-2904, miR-1197-5p, miR-1193, miR-335-5p, miR-6123, miR-576-3p, miR-142b, miR-320c, miR-660, miR-290b-3p, novel\_68, miR-3074-5p, miR-320a-

miR-485-5p, miR-2318, miR-200a-5p, miR-3154, miR-23b, miR-2284n, miR-154b-5p, miR-331-5p, miR-365a-3p, miR-2355-5p, miR-2285aa, miR-141-3p, miR-3068-3p, miR-503-3p, miR-410-3p, miR-486b-3p, novel\_9, miR-6740-5p, miR-409-3p, miR-410-5p, miR-1-5p, miR-2284k, miR-370-5p, miR-378c, miR-1197-3p, miR-6128, miR-3607-3p, miR-2284v, miR-155-5p, miR-105-2, miR-200b-3p, miR-411-3p, miR-582-3p, miR-2427, miR-2284z, miR-582-3p, miR-214-5p, miR-378h, miR-1271-5p, miR-2411-5p, miR-299a-3p, miR-2285ad, miR-429-3p, miR-200a-3p, miR-2898, miR-450a-2-3p, miR-1a-2-5p, miR-200c-3p, miR-181b-5p, miR-3071-3p, miR-30c-2-3p, miR-2285af, miR-200c, miR-3065-3p, miR-200a, miR-490-3p, miR-2285b, miR-29b-2-5p, miR-1, miR-3529-3p, miR-378f, miR-450b-3p, miR-412-3p, miR-19a-3p, miR-21c, miR-3065-5p, miR-2285ab, miR-299b-3p, miR-3120-3p, miR-7-1-3p, novel\_68, miR-329-5p, miR-378b, miR-216b-3p, miR-147-3p, miR-379-3p, miR-206, novel\_1, novel\_87, miR-382-5p, miR-502-5p, miR-4324, miR-142b, miR-133a-5p, miR-576-3p, miR-301b-3p, miR-193b-3p, miR-495-3p, miR-2285x, miR-1193, miR-135a-2-3p, miR-1a-1-5p, miR-2284x, miR-6239, miR-30b-3p, miR-21-5p, miR-2284ab, miR-3071-5p, miR-194-5p, miR-542-3p, miR-1285, miR-1434-3p, miR-181a-5p, miR-6238, miR-412-5p, miR-2284d, miR-503-5p, miR-185-5p, miR-130a-3p, miR-26b-3p, miR-31-5p, miR-466f-3p, miR-193a-3p, miR-330-3p, miR-105-5p, miR-194a, miR-503-5p, miR-377-3p, miR-2284l, miR-382, let-7f-2-3p, let-7f-2-3p, miR-6240, miR-493-5p, miR-186-5p, miR-582-5p, miR-1827, miR-411, miR-21a-3p, let-7f-1-3p, miR-204-3p, miR-155-5p, miR-582-5p, miR-301a-3p, miR-377-3p, miR-193b-3p, miR-139-5p, miR-21-3p, miR-3065-3p, miR-370-5p, miR-30c-1-3p, miR-378a-3p, miR-548o-3p, miR-454-3p, miR-669a-3p, novel\_74, miR-155-5p, miR-19b-1-5p, miR-29b-2-5p, miR-2285i, miR-181c-5p, miR-6525, miR-206-3p, miR-98-3p, miR-

SOX5

ENSOARGO(SRY (sex

miR-429-3p, miR-299a-3p, miR-431, miR-1224-5p, miR-322-5p, novel\_121, miR-1290, miR-196a-5p, miR-330-5p, miR-92b-3p, miR-3956-5p, miR-2285b, miR-29a-5p, miR-127-5p, miR-152-3p, novel\_96, miR-3068-3p, miR-1271, miR-3956, miR-2285aa, miR-25-3p, miR-331-5p, miR-329a, novel\_42, miR-16-5p, miR-1197-3p, miR-103a-3p, miR-149-5p, miR-7b-5p, miR-2113, miR-19b-2-5p, miR-22-3p, miR-197-3p, miR-16b, miR-497-5p, miR-628-5p, miR-503-3p, miR-377-3p, miR-7-5p, miR-105-5p, miR-32, miR-196b-5p, miR-378a-5p, miR-193a-3p, novel\_68, miR-3120-3p, miR-374c-3p, miR-299b-3p, miR-181b-3p, miR-669, miR-677, miR-148a-3p, miR-3591-3p, miR-3065-5p, miR-150-5p, miR-1306, miR-412-3p, miR-335-5p, miR-758-5p, miR-193b-3p, miR-301b-3p, miR-576-3p, novel\_87, miR-206, miR-6119-3p, miR-6123, miR-380-5p, miR-7859, miR-328-3p, miR-193b-5p, miR-361-5p, miR-34a-5p, miR-664-5p, miR-503-5p, miR-487a, miR-181b-1-3p, miR-2285p, novel\_17, miR-3601, miR-324-3p, miR-500a-5p, miR-32-5p, miR-552-3p, miR-216b-3p, miR-301a-3p, miR-377-3p, miR-2284s, miR-15b-5p, miR-655, miR-598-3p, miR-186-5p, miR-1827, miR-625-5p, miR-1895, miR-214, miR-224-5p, miR-6525, miR-665, miR-3604, miR-130b-5p, miR-454-3p, miR-4492, miR-1343-3p, miR-199b-3p, miR-181b-2-3p, miR-2459, miR-455-3p, miR-301b-5p, miR-541, miR-329-3p, miR-758-3p, miR-362-3p, miR-1388-3p, miR-124a, miR-2310, miR-431-5p, miR-199a-3p, miR-16b, miR-130b-3p, miR-491-5p, miR-214-3p, miR-3596, miR-4443, miR-409-5p, miR-378j, miR-299b-5p, miR-1983, miR-3956-3p, miR-6527, miR-2440, miR-218-5p, miR-301a-5p, miR-628-3p, miR-214-5p, miR-582-3p, miR-582-3p, miR-105-2, miR-200b-3p, miR-200c, miR-200c-3p, miR-17-3p, miR-92a-3p, miR-107, miR-487a-3p, miR-598-3p, miR-370-3p, miR-34c-5p, miR-374c-3p, miR-1814c, miR-28-5p, miR-130a-3p, miR-185-5p, miR-503-5p, miR-544b, miR-103, miR-1985, miR-1434-3p, miR-873a-5p, miR-374b-

novel\_99, miR-582-5p, miR-1827, miR-186-5p, miR-30f, miR-2312, let-7g-3p, miR-2285c, miR-450a-1-3p, miR-204-3p, miR-139-5p, miR-216b-5p, miR-582-5p, miR-544-3p, miR-376e-3p, miR-27a-5p, miR-182-5p, miR-296-3p, miR-216b-3p, miR-154a-3p, miR-32-3p, miR-504-5p, miR-130b-5p, miR-4492, miR-664a, miR-6516-3p, miR-450b-3p, miR-222-3p, miR-15b-3p, miR-181c-5p, miR-769-5p, miR-3074-2-3p, miR-665-5p, miR-145a-3p, miR-3184-3p, miR-539-5p, miR-361-5p, miR-16-1-3p, miR-218-1-3p, miR-33b-3p, miR-4429, miR-140-3p, miR-188-3p, miR-1434-5p, miR-5703, miR-1193, miR-2904, miR-2300b-3p, miR-2366, miR-30c-5p, miR-7859, miR-18a-3p, miR-548e-3p, miR-299-3p, miR-30b-3p, miR-320d, miR-185-3p, miR-125b, miR-345-3p, miR-92a-1-5p, miR-219b-5p, miR-210-5p, miR-30b, miR-130a-5p, miR-376c-3p, miR-376a-5p, miR-345-3p, miR-487a, miR-329a-5p, miR-216c-5p, miR-493-5p, miR-504, miR-299b-5p, miR-221, miR-361-3p, miR-25, miR-126b-5p, miR-211-5p, miR-2319b, miR-139-5p, miR-154-3p, miR-2285t, miR-3964, miR-374a-3p, miR-107-5p, miR-769-5p, miR-30b-5p, miR-7705, miR-181d-5p, miR-452-5p, miR-2285f, miR-541-3p, miR-3956-3p, novel\_60, miR-2447, miR-32-3p, miR-101c, miR-544a, miR-30b-3p, miR-143-5p, miR-541, miR-484, miR-2285e, miR-126a-5p, miR-455-3p, miR-9788-3p, miR-221-3p, miR-222-5p, miR-199b-3p, miR-1343-3p, miR-548w, miR-103a-2-5p, miR-1185-5p, miR-182-5p, novel\_115, miR-326, miR-320b, miR-2310, miR-8485, miR-33a-5p, miR-1814c, miR-1248, novel\_48, miR-329b, miR-3154, miR-320a, miR-2448-3p, miR-301, miR-381-3p, miR-488-3p, miR-376c-3p, miR-769, miR-3959-5p, miR-125a, miR-2355-5p, miR-874-3p, miR-487a-3p, miR-204-5p, miR-331-3p, miR-6740-5p, miR-125b-5p, novel\_63, miR-410-5p, miR-2433, miR-145-3p, miR-1260b, miR-323-3p, miR-6128, miR-30c, miR-300, miR-330-5p, miR-3578, miR-3591-5p, miR-345-3p, miR-214-5p, miR-486-5p, miR-545-5p, miR-450a-1-3p, miR-



miR-16b, miR-4508, miR-497-5p, miR-7862, miR-744-5p, miR-31-5p, miR-133b-5p, miR-134-3p, miR-194-3p, novel\_51, miR-378a-5p, miR-483-3p, miR-125a-5p, miR-1343-5p, miR-193a-3p, miR-363-5p, miR-2387, miR-1306, miR-18a-3p, miR-1291, miR-9851-3p, miR-378f, miR-6395, miR-195a-5p, miR-3074-5p, miR-320b, miR-34b, miR-15a, miR-4324, miR-16a, miR-34c, novel\_87, miR-6123, miR-193b-3p, miR-449a, miR-2428, miR-7134-5p, miR-1343-5p, miR-2285ad, miR-423-3p, miR-322-5p, miR-505-5p, miR-483-3p, miR-378h, miR-2411-5p, miR-543-5p, novel\_127, miR-495-5p, miR-30a-3p, miR-3065-3p, miR-3154, miR-329a, miR-485-5p, miR-874-3p, miR-542-5p, miR-370-3p, miR-125a, miR-34c-5p, miR-324-5p, miR-2433, miR-125b-5p, miR-3432a, miR-486b-3p, novel\_42, miR-16-5p, miR-1197-3p, miR-378c, miR-329-3p, miR-296-5p, miR-378b, miR-541, miR-378c, miR-362-3p, miR-2300a-5p, novel\_78, miR-1343-3p, miR-5126, miR-1306-5p, miR-362-3p, novel\_19, miR-2957, miR-16b, novel\_124, miR-25-5p, miR-424-5p, miR-33a-5p, miR-378d, miR-3187-3p, miR-4532, miR-8485, miR-361-3p, miR-10b, miR-20a-3p, miR-7977, miR-378e, miR-378g, miR-4443, miR-371a-5p, miR-2285y, miR-4726-5p, miR-499a-5p, novel\_60, miR-541-3p, miR-3956-3p, miR-361-3p, miR-1285-5p, miR-378i, miR-362-3p, miR-2904, miR-1193, miR-378a-3p, miR-34a-5p, miR-18a-3p, miR-15a-5p, miR-328-3p, miR-219b-5p, miR-324-3p, miR-216a-5p, miR-125b, miR-422a, miR-92a-1-5p, miR-185-3p, miR-122-3p, miR-760-3p, miR-34b-5p, miR-30b-3p, miR-221-5p, miR-486-3p, miR-2411, miR-27b-5p, miR-1827, miR-378a-3p, miR-221-5p, miR-3065-3p, miR-296-3p, miR-552-3p, miR-193b-3p, miR-15b-5p, miR-30e-3p, miR-30a-3p, miR-665, miR-664a, miR-424-5p, miR-4492, miR-378c, miR-3074-5p, miR-665-5p, miR-346, miR-338-3p

PTPRB ENSOARGO (protein) miR-378b, miR-30b-3p, miR-2426, miR-378c, miR-16-2-3p, miR-2300a-5p, miR-222-5p, miR-500-5p, miR-9788-3p, miR-221-3p, miR-1306-5p, novel\_103, miR-342, miR-3085-3p, miR-2330-5p, miR-494-3p, miR-106a-5p, miR-3187-3p, miR-199b-5p, miR-129b-5p, miR-877-3p, miR-10b, miR-20a-3p, miR-3064-5p, miR-7977, miR-489, miR-378e, miR-371a-5p, miR-335, miR-2284q, miR-212-3p, miR-32-3p, miR-2285f, miR-362-5p, miR-376a-5p, miR-2300b-3p, novel\_133, miR-5703, miR-1193, miR-124-3p, miR-2904, miR-378d, miR-505-3p, miR-222-5p, miR-383-5p, novel\_83, miR-216a-5p, miR-466i-5p, miR-106a, miR-216c-5p, miR-20a, miR-125b-2-3p, miR-130a-5p, miR-29b-1-5p, miR-2312, miR-133b-3p, miR-582-5p, novel\_99, miR-660-5p, miR-32-3p, miR-140-5p, miR-378a-3p, miR-532-5p, miR-193b-3p, miR-139-5p, novel\_25, miR-204-3p, miR-222-3p, miR-29b-2-5p, miR-655-3p, miR-324-3p, miR-539-5p, miR-378c, miR-3074-2-3p, miR-206-3p, miR-873a-5p, miR-3071-5p, miR-1260b, miR-21-5p, miR-30b-3p, miR-133b-5p, miR-26b-3p, miR-665, miR-432-5p, miR-2355-3p, miR-20b, miR-17-5p, miR-106a-5p, miR-197-5p, miR-124-5p, miR-452-5p, miR-660, miR-101-5p, miR-654-3p, miR-345-5p, miR-2387, miR-2285ab, miR-21c, miR-18a-3p, miR-505-3p, miR-9851-3p, miR-378b, miR-670-3p, miR-20a-5p, miR-342-3p, novel\_120, miR-2285x, novel\_101, novel\_27, miR-582-3p, miR-300, miR-128-3p, miR-222, miR-378h, miR-6119-5p, miR-2285af, miR-1260a, miR-2898, miR-3529-3p, miR-1, miR-29b-2-5p, miR-490-3p, miR-376c-5p, miR-199a-5p, miR-1957a, miR-376b-5p, miR-381-3p, miR-17-5p, miR-362-5p, miR-3154, miR-1814c, miR-376c-5p, miR-7144-5p, miR-141-3p, miR-365a-3p, miR-199a-5p, miR-5100, miR-2332, miR-1306-3p, miR-410-5p, miR-767-5p, miR-1306-5p, miR-103b, miR-133a-3p, miR-500b-5p, miR-93, miR-378c, miR-2284r, miR-1a-3p, miR-21b, miR-1839-5p, miR-181b-2-3p, miR-153, miR-126a-5p, miR-1185-3p, miR-421, miR-

miR-135a-1-3p, miR-331-3p, miR-17-3p, miR-6516-3p, miR-664a, miR-374b-3p, miR-500, miR-3074-5p, miR-145a-3p, miR-539-5p, miR-425-5p, miR-214, miR-1197-3p, miR-374a-3p, miR-338-3p, miR-145-3p, miR-365a-5p, miR-299, miR-320a, miR-500a-3p, miR-137-3p, miR-2318, miR-345-5p, miR-345-5p, miR-329a, miR-582-5p, miR-485-5p, miR-625-5p, miR-615-5p, miR-141-3p, miR-216b-3p, miR-216b-5p, miR-544-3p, miR-331-5p, miR-582-5p, miR-376c-3p, miR-133c, novel\_17, miR-200c, miR-196a-3p, miR-122-3p, miR-3071-3p, miR-200c-3p, miR-320d, miR-17-3p, miR-21-3p, miR-543-5p, miR-200a-3p, miR-345-3p, miR-376c-3p, miR-125b-2-3p, miR-29b-1-5p, miR-200a, miR-29a-5p, miR-362-3p, miR-2300b-3p, miR-1197-5p, miR-218-2-3p, miR-4429, miR-361-5p, miR-378d, miR-200b-3p, miR-133a-3p, miR-128-3p, miR-429-3p, miR-30d-3p, miR-196a-2-3p, miR-412, miR-200b, miR-9-5p, miR-486-5p, miR-199a-3p, novel\_82, miR-199c, miR-2285t, miR-374a-3p, miR-17-3p, miR-9-5p, miR-2428, miR-2387, miR-409-5p, miR-216a-3p, miR-1291, miR-493-5p, miR-2319b, miR-3074-5p, miR-7977, miR-374c-3p, miR-203-3p, miR-320c, miR-7-5p, miR-199a-3p, miR-320b, miR-29b-1-5p, miR-505, miR-365b-5p, miR-362-3p, miR-378a-5p, miR-214-3p, miR-452-5p, miR-493-5p, miR-101-5p, miR-654-3p, miR-432-3p, miR-345-5p, miR-8485, miR-7b-5p, miR-329-3p, miR-653, miR-145a-5p, miR-412-3p, miR-544a, miR-101a-5p, miR-380-3p, miR-362-3p, miR-26a-2-3p, miR-21b, miR-199b-3p, novel\_78, miR-409b, miR-122-3p, miR-2300a-5p, miR-145b, miR-412-5p, miR-544b, novel\_116  
 miR-2284k, miR-3969, miR-338-5p, miR-144, miR-6516-3p, novel\_9, miR-424-5p, miR-208b-5p, miR-3074-5p, miR-214, miR-3074-2-3p, miR-193a-5p, miR-16-5p, miR-6134, miR-320a, miR-3154, miR-485-5p, miR-503-3p, miR-496-3p, miR-30c-1-3p, miR-2331-3p, miR-532-5p, miR-182-5p, miR-21-3p, miR-2285aa, miR-370-3p, miR-376e-3p, miR-499b-3p, miR-300-3p, miR-2284n, miR-15b-5p, miR-376c-3p, miR-210-5p, miR-2285af, miR-345-3p, miR-30c-2-3p, miR-216a-5p, miR-219b-5p, miR-2284m, miR-320d, miR-30b-3p, miR-377-5p, miR-376c-3p, miR-345-3p, miR-140-3p, miR-1197-5p, miR-330-5p, miR-188-3p, miR-5703, miR-124-3p, miR-2904, miR-142-3p, miR-19b-3p, miR-4429, miR-496, miR-1224-5p, miR-15a-5p, miR-322-5p, miR-15a, miR-16a, miR-485-3p, miR-2284q, novel\_101, miR-452-5p, miR-326-3p, miR-129b-5p, miR-3591-3p, miR-1306, miR-19a-3p, novel\_94, miR-195a-5p, miR-2319a, miR-3074-5p, miR-20a-3p, miR-7977, miR-3120-3p, miR-3082-5p, miR-499a-3p, miR-1185-2-3p, miR-144-3p, miR-320c, miR-326, miR-1306-5p, miR-320b, miR-16b, miR-2411-3p, novel\_51, miR-182-5p, miR-3955-3p, miR-214-3p, miR-466f-3p, miR-101b-3p, miR-424-5p, miR-124a, miR-652-5p, miR-30c-1-3p, miR-7857, miR-16b, miR-2284x, miR-497-5p, miR-31-5p, miR-377-5p, miR-412-5p, miR-2284d, miR-1185-3p, miR-2355-3p

PARP14 ENSOARGO(poly (ADP-ribose))

HSPBAP1 ENSOARGO(HSPB) (heat shock protein)

miR-455-3p, miR-9788-3p, miR-1185-3p, miR-2355-3p, miR-2285e, miR-2285g, miR-2284d, miR-376b-3p, let-7g-5p, miR-130a-3p, miR-409b, miR-1839-5p, miR-101c, miR-2284ab, miR-30b-3p, miR-323b, miR-3071-5p, miR-125b-2-3p, miR-758-3p, miR-30b-3p, miR-542-3p, miR-345-5p, miR-758-3p, miR-432-3p, miR-2284l, miR-432-3p, let-7c-3p, miR-744-3p, let-7a-5p, miR-660, let-7e, miR-214-3p, miR-130b-3p, miR-3955-3p, miR-29b-1-5p, miR-323b-3p, miR-2957, miR-2411-3p, miR-320b, novel\_115, miR-320c, let-7d-5p, miR-376d, miR-1185-2-3p, miR-3082-5p, miR-7-1-3p, miR-376a-3p, let-7e-5p, miR-9-3p, miR-504, miR-2284e, miR-378j, miR-376b-3p, miR-3591-3p, miR-2285ab, miR-2387, miR-2428, miR-301b-3p, miR-24-3p, miR-2285f, miR-2284j, novel\_101, miR-9-5p, miR-2285x, miR-2285t, miR-6119-3p, miR-628-3p, miR-2284o, let-7i, miR-30b-5p, miR-486-5p, miR-9-5p, miR-7859, miR-30c, let-7d, miR-4429, miR-5703, miR-30c-5p, miR-345-3p, miR-196l, novel\_39, let-7g, miR-2424, miR-486-3p, miR-192-3p, miR-2285b, miR-2284f, let-7k, miR-21-3p, miR-2284m, miR-320d, let-7f-5p, miR-98-5p, miR-219b-5p, let-7c-5p, miR-345-3p, miR-30b, miR-376b-3p, miR-2284n, let-7i-5p, miR-300-3p, miR-301a-3p, miR-2285aa, miR-21-3p, miR-504-5p, miR-660-5p, miR-2312, let-7g-3p, miR-345-5p, miR-30f, miR-345-5p, miR-200a-5p, miR-320a, miR-3154, miR-21a-3p, miR-2285c, let-7b-5p, miR-6128, miR-214, let-7b, miR-2284v, miR-454-3p, miR-486b-3p, miR-665, miR-409-3p, let-7f

FAM161A ENSOARGO(family w 3p, miR-206, miR-125a-5p, miR-503-5p, miR-125b, miR-125b-5p, miR-505, miR-24-3p, miR-206-3p, miR-129-2-3p, miR-503-5p, miR-1388-3p, miR-665-5p, miR-2330-3p, miR-503-5p, miR-129-1-3p, miR-296-3p, miR-125a, miR-320b

CAP1 ENSOARGO(CAP, ade: miR-744-5p, miR-30b-3p, miR-30b-3p, miR-758-3p, miR-1285, miR-2300b-3p, miR-542-3p, miR-2320-3p, miR-539-5p, miR-758-5p, miR-133b-5p, miR-548w, miR-31-5p, miR-125a-5p, novel\_51, miR-125b, miR-29b-1-5p, miR-758-3p, miR-503-3p, miR-8485, miR-29b-1-5p, miR-23a-5p, miR-125a, miR-541-5p, miR-3074-5p, miR-452-3p, miR-6123, miR-499a-5p, miR-125b-5p, miR-4324, miR-34c-3p, miR-145-3p, miR-8095, miR-3956-3p, miR-3074-5p, novel\_60

PPT1 ENSOARGO(palmitoy 5p, miR-4726-5p, miR-664a, miR-125b-5p, miR-324-3p, miR-34c, miR-135a-5p, miR-370-5p, miR-2440, miR-449a, miR-6134, miR-361-3p, miR-224-5p, miR-1193, miR-4510, miR-23a-5p, miR-135b-5p, miR-6395, miR-1827, miR-485-5p, miR-1291, miR-345-5p, miR-345-5p, miR-504, miR-3141, miR-154b-5p, miR-34c-5p, miR-323a-5p, miR-323-5p, miR-6130, miR-34b, miR-2355-5p, miR-7689-3p, miR-370-5p, miR-296-3p, miR-125a, miR-552-3p, miR-4792, miR-504-5p, miR-874-3p, miR-452-3p, miR-34b-5p, miR-30b-3p, miR-125a-5p, novel\_96, miR-543-5p, miR-491-5p, miR-3141, miR-125b, miR-92a-1-5p, miR-224-5p, miR-296-3p, miR-296-3p, miR-345-5p, miR-101-5p, miR-2330-5p, miR-34a-5p, miR-101a-5p, miR-23b-5p, miR-328-3p, miR-1224-5p

DES ENSOARGO(desmin [

miR-3074-2-3p, miR-42b-5p, miR-4510, let-7b-5p, miR-338-3p, miR-206-3p, miR-324-3p, miR-338-5p, miR-424-5p, miR-6516-3p, miR-370-5p, miR-21-3p, miR-182-5p, miR-221-5p, miR-204-3p, miR-27a-5p, miR-192-5p, miR-323-5p, miR-6130, miR-656-3p, miR-21a-3p, miR-582-5p, novel\_99, miR-133b-3p, miR-18a-5p, miR-216c-5p, miR-130a-5p, miR-216a-5p, miR-30b-3p, miR-221-5p, miR-320d, miR-2284m, miR-760-3p, miR-3600, miR-199a-3p, novel\_83, miR-15a-5p, miR-1193, miR-5703, miR-215-5p, miR-2300b-3p, miR-376a-5p, miR-378d, miR-4429, miR-2285f, miR-452-5p, novel\_60, miR-3059-5p, miR-8095, miR-9-3p, miR-154a, miR-3958-3p, miR-541-5p, let-7d-5p, miR-27a-3p, miR-7857-3p, miR-129b-5p, miR-199b-5p, miR-877-3p, novel\_94, let-7a-5p, miR-424-5p, miR-382-3p, miR-494-3p, miR-30c-1-3p, miR-320b, miR-326, let-7e, miR-27a-3p, miR-105-1, miR-216a-3p, miR-4791, miR-2284aa, miR-2426, miR-450b-5p, miR-6128, miR-133a-3p, miR-1306-5p, miR-370-5p, miR-204-5p, miR-486b-3p, miR-370-3p, miR-215-5p, miR-199a-5p, miR-2284n, miR-365a-3p, miR-320a, miR-18a, miR-488-3p, miR-3074-1-3p, miR-671-5p, miR-485-5p, miR-30a-3p, miR-1, miR-181a-2-3p, miR-4286, miR-199a-5p, miR-490-3p, miR-1271-3p, miR-30c-2-3p, let-7c-5p, miR-339a, miR-376b-3p, miR-191-3p, miR-7641, miR-582-3p, miR-545-5p, miR-302a-5p, miR-483-3p, miR-134, miR-128-3p, miR-105-2, let-7d, miR-3957-3p, miR-1193, miR-2285x, miR-135a-2-3p, miR-326-3p, miR-2428, miR-211, miR-3959-3p, miR-24-3p, miR-16a, let-7i, miR-15a, miR-6529b, miR-6402, miR-203b-5p, miR-656-5p, miR-128-1-5p, miR-320b, miR-655-5p, miR-7-1-3p, miR-378b, miR-323a-5p, miR-18a-3p, miR-2285ab, miR-18b, miR-7975, miR-195a-5p, miR-450b-3p, miR-101-5p, miR-345-5p, miR-654-3p, miR-455-5p, miR-466f-3p, miR-377-5p, miR-6238, miR-432-5p, let-7g-5p, miR-185-5p, miR-145a-5p, miR-7862, miR-455-5p, miR-2284 miR-380-3p, miR-2284ab, let-7b, miR-3184-5p, miR-142a, miR-503-3p, miR-496, miR-504, miR-101a-5p, miR-17-3p, miR-17-3p, miR-17-3p, miR-382, miR-3600, miR-496-3p, miR-503-3p, miR-504-5p, miR-1271-3p

miR-30d-5p, miR-27b-5p, miR-450a-1-3p, miR-3613-5p, miR-21a-3p, miR-1827, miR-186-5p, miR-1895, miR-625-5p, miR-30f, miR-552-3p, miR-30c-1-3p, miR-504-5p, miR-221-5p, miR-2331-3p, miR-877-5p, miR-193b-3p, miR-323-5p, miR-6130, miR-139-5p, miR-377-3p, miR-665, miR-664a-5p, miR-132-5p, miR-2285j, miR-130b-5p, miR-487a-5p, miR-17-3p, miR-6516-3p, miR-450b-3p, miR-2330-3p, miR-425-5p, miR-3074-2-3p, miR-4510, miR-3074-5p, miR-6134, miR-122-5p, miR-3184-5p, miR-6525, miR-5703, miR-140-3p, miR-2904, miR-124-3p, miR-193b-5p, miR-1246, novel\_133, miR-30c-5p, miR-34a-5p, miR-16-1-3p, miR-664-5p, miR-4429, miR-485-3p, miR-18a-3p, miR-328-3p, novel\_83, miR-487a-3p, miR-345-3p, miR-125b, miR-185-3p, miR-500a-5p, miR-216a-5p, novel\_17, miR-210-5p, miR-542-5p, miR-30b, miR-21-3p, miR-34b-5p, miR-221-5p, miR-320d, miR-216c-5p, miR-143-3p, miR-486-3p, miR-129b-5p, miR-361-3p, miR-1983, miR-9-3p, miR-136-5p, miR-504, miR-541-5p, miR-2285u, miR-139-5p, miR-4792, miR-4443, miR-203-3p, miR-3596, novel\_82, miR-30b-5p, miR-2285t, miR-7134-3p, miR-4726-5p, miR-499a-5p, miR-628-3p, miR-541-3p, miR-1285-5p, miR-8095, miR-423-5p, miR-9-3p, miR-30b-3p, miR-541, miR-484, miR-101c, miR-2426, miR-1388-5p, miR-222-5p, miR-5010-3p, miR-199b-3p, novel\_78, miR-105-1, novel\_4, miR-2459, miR-455-3p, miR-9788-3p, miR-153, miR-320b, miR-342, miR-542-5p, miR-153-3p, miR-3955-3p, miR-491-5p, miR-376b, miR-124a, miR-1388-3p, miR-8485, miR-30c-1-3p, miR-320a, miR-3154, miR-30e-5p, miR-485-5p, miR-1248, miR-10b-3p, miR-125a, miR-2355-5p, miR-874-3p, miR-300-3p, miR-34c-5p, miR-125b-5p, miR-331-3p, miR-6740-5p, miR-100-3p, miR-5100, miR-34c-3p, miR-486b-3p, miR-134-5p, miR-3432a, miR-365a-5p, miR-1197-3p, miR-2903, miR-30a-5p, miR-134, miR-1290, miR-345-3p, miR-105-2, miR-128-3p, miR-30c, miR-7641, novel\_121, miR-450a-1-

miR-15b-5p, miR-5480-3p, miR-2331-3p, miR-296-3p, miR-552-3p, miR-345-5p, miR-186-5p, miR-450a-1-3p, miR-129b-3p, miR-224-5p, miR-769-5p, miR-6525, miR-3184-5p, miR-3074-5p, miR-3184-3p, miR-214, miR-874-5p, miR-15b-3p, miR-151-3p, miR-7859, miR-18a-3p, miR-493-3p, miR-361-5p, miR-16-1-3p, miR-133a-3p, miR-2366, miR-378i, miR-378a-3p, miR-377-5p, miR-664b-3p, miR-503-5p, miR-345-3p, miR-195a-3p, novel\_17, miR-92a-1-5p, miR-422a, miR-345-3p, miR-219b-5p, miR-324-3p, miR-378g, miR-139-5p, miR-335-3p, miR-361-3p, miR-423-5p, miR-2447, miR-9-5p, miR-3968, miR-615, miR-2440, miR-147a, miR-539-5p, miR-496-5p, miR-2459, miR-421, miR-455-3p, miR-1839-5p, miR-378d, miR-8485, miR-1388-3p, miR-491-5p, miR-214-3p, miR-182-5p, miR-16b, miR-29b-1-5p, miR-874-3p, miR-345-5p, miR-331-5p, miR-1260b, miR-1197-3p, miR-16-5p, miR-331-5p, miR-134-5p, miR-2433, miR-505-5p, miR-9-5p, miR-322-5p, miR-134-5p, miR-450a-1-3p, miR-6517, miR-299a-3p, miR-2285ad, miR-330-5p, miR-450c-5p, novel\_39, novel\_127, novel\_96, miR-152-3p, miR-411b-3p, miR-299b-3p, miR-3074-5p, novel\_68, miR-378f, miR-148a-3p, miR-2284w, miR-335-5p, miR-1839-3p, miR-4324, novel\_87, miR-134-3p, miR-149-5p, novel\_116, miR-340-3p, miR-16-1-3p, miR-16b, miR-188-5p, miR-27b-3p, miR-497-5p, miR-432, miR-431-3p, miR-450c-3p, miR-432-3p, miR-432-3p, miR-668-3p, miR-378a-5p, novel\_51, miR-2411-3p, miR-105-5p, miR-139-5p, miR-6130, miR-204-3p, miR-378a-3p, miR-182-5p, miR-3065-3p, miR-370-5p, let-7g-3p, miR-133b-3p, miR-145a-3p, miR-4510, miR-539-5p, miR-378c, miR-2330-3p, miR-664a, miR-17-3p, miR-450b-3p, miR-487a-5p, miR-708-5p, miR-424-5p, miR-324-3p, miR-15a-5p, miR-148b-3p, novel\_83, miR-532-3p, miR-378d, miR-1197-5p, miR-188-3p, miR-1193, miR-29b-1-5p, miR-2432, miR-216c-5p, miR-760-3p, miR-466i-5p, miR-299-3p, miR-

miR-376a-5p, miR-7641, miR-483-3p, miR-582-3p, miR-134, miR-345-3p, miR-501-3p, miR-30a-5p, miR-218-2-3p, miR-29d-3p, miR-128-3p, miR-181a-2-3p, miR-24-2-5p, miR-1957a, miR-199a-5p, miR-3065-3p, miR-6119-5p, miR-1260a, miR-30c-2-3p, miR-543-5p, miR-107, miR-141-3p, miR-615-5p, miR-370-3p, miR-34c-5p, miR-199a-5p, miR-17-5p, miR-320a, miR-3154, miR-485-5p, miR-671-5p, miR-93, miR-370-5p, miR-410-5p, miR-34c-3p, miR-29b-3p, miR-767-5p, miR-28-5p, miR-130a-3p, miR-544b, miR-103, miR-20b, miR-1434-3p, miR-1285, miR-873a-5p, miR-374b-3p, miR-1260b, miR-21-5p, miR-29b, miR-130b-5p, miR-382, miR-345-5p, miR-17-5p, miR-106a-5p, miR-124-5p, miR-452-5p, miR-125a-5p, miR-320b, miR-29a-3p, miR-34b, miR-2404, miR-21c, miR-378b, miR-18a-3p, miR-107, miR-376a-2-5p, miR-505-3p, miR-195a-5p, miR-219b-3p, miR-495-3p, miR-1193, miR-371b-3p, miR-24-3p, miR-2428, miR-449a, miR-326-3p, miR-133a-5p, miR-6402, miR-20a-5p, miR-502-5p, miR-15a, miR-34c, miR-16a, miR-128-1-5p, miR-505-3p, miR-3600, miR-15a-5p, miR-532-3p, miR-2300b-3p, miR-1246, novel\_133, miR-188-3p, miR-140-3p, miR-5703, miR-2904, miR-4429, miR-378d, miR-216c-5p, miR-20a, miR-125b, miR-185-3p, miR-412-5p, miR-760-3p, miR-106a, miR-320d, miR-21-3p, miR-34b-5p, miR-30d, miR-30b-3p, miR-221-5p, miR-221-5p, miR-182-5p, miR-3065-3p, miR-21-3p, miR-370-5p, miR-139-5p, miR-6130, miR-193b-3p, miR-544-3p, miR-22-3p, novel\_32, miR-204-3p, miR-21a-3p, miR-30f, miR-4510, miR-2330-3p, miR-6134, miR-338-3p, miR-320e, miR-664a, miR-450b-3p, miR-424-5p, miR-708-5p, miR-2300a-5p, miR-151a-3p, miR-27a-3p, miR-5010-3p, miR-216a-3p, miR-9788-3p, miR-484, miR-296-5p, miR-412-3p, miR-544a, miR-3120-5p, miR-382-3p, miR-424-5p, miR-106a-5p, miR-30c-1-3p, novel\_103, miR-1306-5p, miR-326, miR-320b, miR-3955-3p, miR-20a-3p, miR-664b, miR-7977, miR-3082-5p, miR-27a-



miR-6516-5p, miR-7641, miR-376a-5p, miR-411-3p, miR-105-2, miR-345-3p, miR-29d-3p, miR-30a-5p, miR-28b, miR-2478, miR-30a-3p, miR-4286, miR-181a-2-3p, miR-17-3p, miR-107, miR-217, miR-339a, miR-365a-3p, miR-487a-3p, miR-215-5p, miR-10b-3p, miR-18a, miR-323-3p, miR-3607-3p, miR-103b, miR-28-5p, miR-410-5p, miR-29b-3p, miR-144, miR-409-3p, miR-185-5p, miR-6238, miR-2355-3p, miR-103, miR-26b-3p, miR-29b, miR-2284ab, miR-30b-3p, miR-873a-5p, miR-1285, miR-1434-3p, miR-3071-5p, miR-145a-5p, miR-124-5p, miR-197-5p, miR-190a, miR-330-3p, miR-146b-3p, miR-670-3p, miR-29a-3p, miR-107, miR-376a-2-5p, miR-6516-3p, miR-2285ab, miR-18b, miR-2387, miR-378b, miR-18a-3p, miR-371b-3p, novel\_27, miR-326-3p, miR-2428, miR-2285x, miR-17-3p, novel\_1, miR-133a-5p, miR-33a-3p, miR-362-3p, miR-215-5p, miR-2300b-3p, miR-376a-5p, miR-140-3p, miR-2432, miR-146a-5p, miR-760-3p, miR-30b-3p, miR-30d, miR-216a-5p, miR-185-3p, miR-6516, miR-192-5p, miR-6130, miR-877-5p, miR-21-3p, miR-182-5p, miR-532-5p, miR-2312, miR-154b-3p, miR-18a-5p, novel\_99, miR-21a-3p, miR-6134, miR-338-3p, miR-4510, miR-425-5p, miR-3074-2-3p, miR-450b-3p, miR-6516-3p, miR-17-3p, miR-664a, miR-708-5p, miR-105-1, miR-151a-3p, miR-5010-3p, miR-450b-5p, miR-3120-5p, miR-6529a, miR-484, miR-4791, miR-30b-3p, miR-33a-5p, miR-3955-3p, miR-326, novel\_103, miR-362-3p, miR-452-3p, miR-10b, miR-20a-3p, miR-541-5p, miR-7977, novel\_94, miR-877-3p, miR-129b-5p, miR-8095, novel\_60, miR-3059-5p, miR-541-3p, miR-2285f, miR-2285t, miR-382-3p, miR-9-5p, miR-450a-1-3p, miR-129-1-3p, miR-486-5p, miR-6517, novel\_79, miR-18b-5p, miR-1290, miR-2427, miR-330-5p, miR-450b-5p, miR-200a, miR-2285b, miR-28-3p, novel\_127, miR-205-5p, miR-125a-3p, miR-376c-3p, miR-874-3p, miR-503-3p, miR-2355-5p, miR-876-3p, miR-329a, miR-30a-5p, miR-1107-3p, miR-181c-3p, miR-28a-3p, miR-505, miR-324-3p, miR-330-3p, miR-125a-3p, miR-152-3p, miR-200a-3p, miR-103a-2-5p, miR-130b-3p, miR-17-3p, miR-30a-3p, miR-6240, miR-329a-5p, miR-490-3p, miR-29a-5p, miR-30b-3p, miR-1434-3p, miR-873a-5p, miR-30b-3p, miR-30d-3p, miR-181b-2-3p, miR-130a-3p, miR-3600, miR-330-3p, novel\_78, novel\_116, miR-148b-3p, miR-539-5p, miR-9-5p, miR-107-5p, miR-30a-3p, miR-30e-3p, miR-370-5p, miR-410-5p, miR-454-3p, miR-17-3p, miR-3958-3p, miR-1193, miR-3074-2-3p, miR-17-3p, miR-9-5p, miR-301b-3p, novel\_27, miR-137-3p, miR-148a-3p, miR-2448-3p, miR-488-3p, novel\_99, miR-544-5p, miR-141-3p, miR-2285aa, miR-370-5p, miR-329-5p, miR-677, miR-3082-5p, miR-499a-3p, miR-301a-3p, miR-499b-3p

MYRFL ENSOARGO(myelin r

OSBPL11 ENSOARGO(oxystero

miR-2887, miR-183-5p, miR-377-5p, miR-125b-2-3p, miR-324-3p, miR-466i-5p, miR-3600, novel\_83, miR-15a-5p, miR-5703, miR-1197-5p, miR-2904, miR-124-3p, miR-193b-5p, novel\_133, let-7a-3p, miR-33b-3p, miR-142-3p, miR-425-5p, miR-3074-5p, miR-145a-3p, miR-6525, miR-665, let-7b-3p, miR-130b-5p, miR-500, miR-424-5p, miR-4492, miR-664a, miR-450b-3p, miR-370-5p, miR-15b-5p, novel\_32, miR-433-3p, miR-500a-3p, let-7f-1-3p, miR-450a-1-3p, miR-2285c, miR-21a-3p, novel\_99, miR-424-5p, miR-127-3p, miR-124a, miR-16b, miR-323b-3p, novel\_103, miR-326, miR-1306-5p, miR-153-3p, miR-199b-5p, miR-491-5p, miR-27a-3p, miR-1343-3p, miR-105-1, miR-330-3p, miR-2285e, miR-153, miR-3962, miR-412-3p, miR-323b, miR-541, miR-484, miR-101c, miR-2426, miR-541-3p, miR-3956-3p, miR-3059-5p, novel\_60, miR-361-3p, miR-107-5p, miR-2285t, miR-490-5p, miR-3968, miR-4726-5p, miR-211-5p, miR-20a-3p, miR-27a-3p, miR-3082-5p, miR-489, miR-378g, miR-199b-5p, miR-4286, miR-2385-3p, miR-199a-5p, novel\_96, miR-28-3p, miR-412, miR-134-5p, miR-450a-1-3p, miR-582-3p, miR-505-5p, miR-322-5p, miR-330-5p, miR-1343-5p, miR-134, miR-196a-5p, miR-105-2, miR-128-3p, miR-3607-3p, miR-16-5p, miR-28a-3p, miR-2332, miR-370-5p, miR-204-5p, miR-134-5p, novel\_9, miR-542-5p, miR-199a-5p, miR-374c-3p, miR-137-3p, miR-2448-3p, miR-671-5p, miR-7144-5p, let-7g-3p, miR-382, miR-668-3p, miR-6240, miR-130b-5p, miR-432-3p, miR-654-3p, miR-330-3p, miR-105-5p, miR-1343-5p, miR-196b-5p, miR-377-5p, novel\_116, miR-134-3p, miR-2285g, miR-374b-3p, miR-450c-3p, miR-1843b-5p, miR-223-3p, miR-27b-3p, miR-497-5p, miR-16b, miR-1193, miR-135a-2-3p, miR-199b-5p, miR-2428, miR-326-3p, miR-24-3p, miR-211, miR-16a, miR-576-3p, miR-6402, miR-15a, miR-655-5p, miR-3074-5p, miR-374c-3p, miR-378b, miR-216a-3p, miR-1306, miR-3970, miR-150-5p, miR-2287, miR-195a-5p

miR-155-5p, miR-208b-5p, miR-320e, miR-6134, miR-181c-5p, miR-1271, miR-345-5p, miR-154b-3p, novel\_99, miR-21a-3p, miR-27b-5p, miR-22-3p, miR-155-5p, miR-496-3p, miR-548o-3p, miR-154a-3p, miR-320d, miR-21-3p, miR-345-3p, miR-29b-1-5p, miR-421-5p, miR-142a-3p, miR-181b-1-3p, miR-486-3p, miR-2432, miR-380-3p, miR-487a, miR-493-3p, miR-4429, miR-1246, miR-188-3p, miR-5703, miR-487a-3p, miR-7859, miR-532-3p, miR-548e-3p, miR-505-3p, miR-485-3p, miR-3964, miR-154-3p, miR-181d-5p, miR-9-5p, miR-96-5p, miR-147-3p, miR-136-5p, miR-9-3p, miR-7857-3p, miR-2483-3p, miR-203-3p, miR-7689-3p, miR-3955-3p, miR-320b, miR-505, miR-29b-1-5p, miR-1388-5p, miR-2284aa, miR-1839-5p, miR-4791, miR-7857, miR-30b-3p, miR-125b-2-3p, miR-142-3p, miR-147a, miR-539-5p, miR-9788-3p, miR-455-3p, miR-105-1, miR-548w, miR-330-3p, novel\_78, miR-181b-2-3p, miR-486b-3p, miR-135a-5p, miR-28a-3p, miR-103b, miR-345-5p, novel\_48, miR-376c-5p, miR-301, miR-320a, miR-3154, miR-374c-3p, miR-300-3p, miR-365a-3p, miR-3959-5p, miR-487a-3p, miR-503-3p, miR-2898, miR-28-3p, miR-181b-5p, novel\_39, miR-105-2, miR-128-3p, miR-155-5p, miR-496, miR-345-3p, miR-9-5p, miR-758-5p, miR-1271-5p, miR-2284z, novel\_121, miR-421-5p, miR-656-5p, miR-6402, novel\_27, miR-2284w, miR-135b-5p, miR-505-3p, miR-379-5p, miR-376b-5p, miR-3065-5p, miR-216a-3p, miR-677, miR-320c, miR-669, miR-181b-3p, miR-216b-3p, miR-7-1-3p, miR-378a-5p, miR-105-5p, miR-330-3p, miR-2411-3p, miR-432-3p, miR-432-3p, let-7j, miR-539-3p, miR-345-5p, miR-6240, miR-101-5p, miR-363-5p, miR-628-5p, miR-30b-3p, miR-380-3p, miR-219a-1-3p, miR-2284x, miR-708-3p, miR-1843b-5p, miR-181a-5p, miR-223-3p, miR-22-3p, miR-3535, miR-185-5p, miR-6238, miR-183-5p, miR-329a-5p, miR-2330-5p, miR-106a-5p, miR-105-3p, miR-20a, miR-29b-1-5p, miR-2284y, miR-224-5p, miR-6119-5p, miR-29b-1-5p, miR-505, miR-106b-5p, miR-106a-5p, miR-17-5p, miR-106a, miR-196b-5p, miR-200c-3p, miR-3955-3p, miR-200a-3p, miR-103a-2-5p, miR-429-3p, miR-106a, miR-1343-3p, miR-3600, miR-134-3p, miR-1298-3p, miR-126a-5p, miR-20b, miR-196a-5p, miR-143-5p, miR-3578, miR-1388-5p, miR-184-3p, miR-21b, miR-3958-5p, miR-3074-2-3p, miR-219a-5p, miR-93, miR-224-5p, miR-2284w, miR-2428, miR-20a-5p, miR-6740-5p, miR-331-3p, miR-107-5p, miR-499a-5p, novel\_9, miR-490-5p, miR-3964, miR-22-5p, miR-502b, miR-141-3p, miR-126b-5p, miR-2284s, miR-323a-5p, miR-378g, miR-323-5p, miR-93-5p, miR-17-5p, miR-410-5p, let-7g-3p, miR-20b-5p, miR-18b, miR-216a-3p, miR-18a, miR-410-5p, miR-18a-5p, miR-365a-3p, miR-203-3p, miR-15b-3p, miR-665, miR-664a, miR-17-3p, miR-1468-5p, miR-147-5p, miR-204-5p, miR-539-5p, miR-212-3p, miR-6128, miR-3958-5p, miR-17-3p, novel\_111, miR-484, novel\_133, miR-582-3p, miR-128-3p, miR-330-3p, miR-18b-5p, miR-503-5p, miR-758-5p, miR-216a-3p, novel\_121, miR-503-5p, miR-330-3p, miR-17-3p, miR-543-5p, miR-1468, miR-6240, miR-2330-5p, miR-503-5p, miR-376a-5p, miR-2285r, miR-664b-3p, miR-654-3p, miR-432-3p, miR-1271-3p

ZFP69 ENSOARGO(ZFP69 zi: 486b-3p, miR-135a-5p, miR-28a-3p, miR-103b, miR-345-5p, novel\_48, miR-376c-5p, miR-301, miR-320a, miR-3154, miR-374c-3p, miR-300-3p, miR-365a-3p, miR-3959-5p, miR-487a-3p, miR-503-3p, miR-2898, miR-28-3p, miR-181b-5p, novel\_39, miR-105-2, miR-128-3p, miR-155-5p, miR-496, miR-345-3p, miR-9-5p, miR-758-5p, miR-1271-5p, miR-2284z, novel\_121, miR-421-5p, miR-656-5p, miR-6402, novel\_27, miR-2284w, miR-135b-5p, miR-505-3p, miR-379-5p, miR-376b-5p, miR-3065-5p, miR-216a-3p, miR-677, miR-320c, miR-669, miR-181b-3p, miR-216b-3p, miR-7-1-3p, miR-378a-5p, miR-105-5p, miR-330-3p, miR-2411-3p, miR-432-3p, miR-432-3p, let-7j, miR-539-3p, miR-345-5p, miR-6240, miR-101-5p, miR-363-5p, miR-628-5p, miR-30b-3p, miR-380-3p, miR-219a-1-3p, miR-2284x, miR-708-3p, miR-1843b-5p, miR-181a-5p, miR-223-3p, miR-22-3p, miR-3535, miR-185-5p, miR-6238, miR-183-5p, miR-329a-5p, miR-2330-5p, miR-106a-5p, miR-105-3p, miR-20a, miR-29b-1-5p, miR-2284y, miR-224-5p, miR-6119-5p, miR-29b-1-5p, miR-505, miR-106b-5p, miR-106a-5p, miR-17-5p, miR-106a, miR-196b-5p, miR-200c-3p, miR-3955-3p, miR-200a-3p, miR-103a-2-5p, miR-429-3p, miR-106a, miR-1343-3p, miR-3600, miR-134-3p, miR-1298-3p, miR-126a-5p, miR-20b, miR-196a-5p, miR-143-5p, miR-3578, miR-1388-5p, miR-184-3p, miR-21b, miR-3958-5p, miR-3074-2-3p, miR-219a-5p, miR-93, miR-224-5p, miR-2284w, miR-2428, miR-20a-5p, miR-6740-5p, miR-331-3p, miR-107-5p, miR-499a-5p, novel\_9, miR-490-5p, miR-3964, miR-22-5p, miR-502b, miR-141-3p, miR-126b-5p, miR-2284s, miR-323a-5p, miR-378g, miR-323-5p, miR-93-5p, miR-17-5p, miR-410-5p, let-7g-3p, miR-20b-5p, miR-18b, miR-216a-3p, miR-18a, miR-410-5p, miR-18a-5p, miR-365a-3p, miR-203-3p, miR-15b-3p, miR-665, miR-664a, miR-17-3p, miR-1468-5p, miR-147-5p, miR-204-5p, miR-539-5p, miR-212-3p, miR-6128, miR-3958-5p, miR-17-3p, novel\_111, miR-484, novel\_133, miR-582-3p, miR-128-3p, miR-330-3p, miR-18b-5p, miR-503-5p, miR-758-5p, miR-216a-3p, novel\_121, miR-503-5p, miR-330-3p, miR-17-3p, miR-543-5p, miR-1468, miR-6240, miR-2330-5p, miR-503-5p, miR-376a-5p, miR-2285r, miR-664b-3p, miR-654-3p, miR-432-3p, miR-1271-3p

EPHA4 ENSOARGO(EPH rece: 5p, miR-143-5p, miR-3578, miR-1388-5p, miR-184-3p, miR-21b, miR-3958-5p, miR-3074-2-3p, miR-219a-5p, miR-93, miR-224-5p, miR-2284w, miR-2428, miR-20a-5p, miR-6740-5p, miR-331-3p, miR-107-5p, miR-499a-5p, novel\_9, miR-490-5p, miR-3964, miR-22-5p, miR-502b, miR-141-3p, miR-126b-5p, miR-2284s, miR-323a-5p, miR-378g, miR-323-5p, miR-93-5p, miR-17-5p, miR-410-5p, let-7g-3p, miR-20b-5p, miR-18b, miR-216a-3p, miR-18a, miR-410-5p, miR-18a-5p, miR-365a-3p, miR-203-3p, miR-15b-3p, miR-665, miR-664a, miR-17-3p, miR-1468-5p, miR-147-5p, miR-204-5p, miR-539-5p, miR-212-3p, miR-6128, miR-3958-5p, miR-17-3p, novel\_111, miR-484, novel\_133, miR-582-3p, miR-128-3p, miR-330-3p, miR-18b-5p, miR-503-5p, miR-758-5p, miR-216a-3p, novel\_121, miR-503-5p, miR-330-3p, miR-17-3p, miR-543-5p, miR-1468, miR-6240, miR-2330-5p, miR-503-5p, miR-376a-5p, miR-2285r, miR-664b-3p, miR-654-3p, miR-432-3p, miR-1271-3p

LRCH3 ENSOARGO(leucine: 484, novel\_133, miR-582-3p, miR-128-3p, miR-330-3p, miR-18b-5p, miR-503-5p, miR-758-5p, miR-216a-3p, novel\_121, miR-503-5p, miR-330-3p, miR-17-3p, miR-543-5p, miR-1468, miR-6240, miR-2330-5p, miR-503-5p, miR-376a-5p, miR-2285r, miR-664b-3p, miR-654-3p, miR-432-3p, miR-1271-3p

miR-331-3p, miR-125b-5p, miR-138-5p, miR-134-5p, miR-16-5p, miR-1260b, miR-1197-3p, miR-503-3p, miR-301, miR-320a, let-7g-3p, miR-485-5p, miR-1814c, miR-874-3p, miR-503-3p, miR-615-5p, miR-125a, miR-2355-5p, miR-1260a, miR-30c-2-3p, miR-2898, miR-17-3p, novel\_127, miR-4286, novel\_39, miR-134, miR-885-3p, let-7a-2-3p, miR-496, miR-6517, miR-423-3p, miR-222, miR-299a-3p, miR-322-5p, miR-129-1-3p, miR-134-5p, miR-15a, miR-16a, miR-17-3p, novel\_101, miR-2428, miR-18a-3p, miR-1306, miR-450b-3p, miR-1291, miR-195a-5p, miR-3074-5p, novel\_69, miR-299b-3p, miR-670-3p, miR-146b-3p, miR-669, miR-320c, miR-6535, miR-377-3p, miR-125a-5p, miR-363-5p, let-7a-2-3p, miR-1285, miR-1260b, miR-138, miR-16b, miR-497-5p, miR-665, miR-185-5p, novel\_116, miR-222-3p, miR-3604, miR-132-5p, miR-664a, miR-17-3p, miR-424-5p, miR-874-5p, miR-3074-5p, miR-129-2-3p, miR-4510, miR-539-5p, miR-3074-2-3p, miR-6525, miR-3184-5p, miR-1827, miR-885-3p, miR-496-3p, miR-221-5p, miR-504-5p, miR-30c-1-3p, miR-552-3p, miR-6130, miR-377-3p, miR-499b-3p, miR-15b-5p, miR-151b, novel\_32, miR-204-3p, novel\_17, miR-185-3p, miR-125b, miR-760-3p, miR-320d, miR-21-3p, miR-299-3p, miR-221-5p, miR-345-3p, miR-125b-2-3p, miR-2432, miR-1197-5p, miR-4429, miR-493-3p, miR-218-1-3p, miR-548e-3p, miR-18a-3p, miR-3960, miR-15a-5p, miR-7859, miR-532-3p, miR-1247-5p, miR-151-5p, miR-371a-5p, miR-4726-5p, miR-885-5p, miR-2447, miR-6527, miR-361-3p, miR-423-5p, miR-1285-5p, miR-221, miR-361-3p, miR-378j, miR-504, miR-7977, miR-7689-3p, miR-499a-3p, miR-1306-5p, miR-320b, miR-16b, miR-25-5p, novel\_124, miR-424-5p, miR-127-3p, miR-30c-1-3p, miR-2310, miR-8485, miR-4532, miR-296-5p, miR-6529a, miR-484, miR-1343-3p, novel\_4, miR-2300a-5p, miR-222-5p, miR-221-3p, miR-455-3p

miR-186-5p, miR-345-5p, miR-129b-3p, miR-433-3p, miR-2285c, miR-450a-1-3p, miR-3613-5p, novel\_25, miR-22-3p, let-7i-5p, miR-301a-3p, miR-139-5p, miR-370-5p, miR-296-3p, miR-552-3p, miR-30c-1-3p, miR-378a-3p, miR-2331-3p, miR-545-3p, miR-504-5p, miR-1277-3p, miR-660-5p, miR-548o-3p, miR-487a-5p, miR-454-3p, miR-874-5p, miR-129-5p, miR-130b-5p, miR-450b-3p, miR-665, let-7f, let-7b-5p, miR-6525, miR-206-3p, miR-3958-5p, miR-3074-2-3p, let-7b, miR-378c, miR-3074-5p, miR-378d, miR-142-3p, miR-378a-3p, miR-217-5p, miR-5703, miR-378i, novel\_133, miR-2366, miR-1961, miR-2300b-3p, miR-376a-5p, novel\_83, miR-2284h-5p, miR-148b-3p, miR-212-5p, miR-106a, miR-3653-3p, let-7k, miR-299-3p, miR-106a, miR-98-5p, miR-219b-5p, miR-125b, miR-345-3p, miR-422a, miR-92a-1-5p, miR-26a-5p, miR-2285p, miR-486-3p, miR-130a-5p, miR-20a, miR-5100, miR-345-3p, miR-216c-5p, miR-1983, miR-504, miR-136-5p, miR-381-3p, let-7d-5p, miR-1185-2-3p, miR-4443, miR-378e, miR-211-5p, miR-139-5p, miR-452-3p, miR-3964, miR-2284q, miR-3958-3p, novel\_111, miR-6527, miR-9-5p, miR-3059-5p, miR-541-3p, miR-1839-5p, miR-3120-5p, miR-378c, miR-323b, miR-7857, miR-1a-3p, miR-412-3p, miR-378b, miR-541, miR-455-3p, miR-1185-3p, miR-421, miR-2285e, miR-153, miR-145b, miR-409b, miR-153-3p, let-7e, miR-3955-3p, miR-130b-3p, miR-505, miR-323b-3p, miR-106b-5p, miR-326, miR-431-5p, miR-3187-3p, miR-2310, miR-30c-1-3p, miR-378d, miR-376b, let-7a-5p, miR-494-3p, miR-106a-5p, miR-20b-5p, miR-1814c, miR-671-5p, miR-10b-3p, miR-345-5p, miR-93-5p, miR-17-5p, miR-3154, miR-381-3p, miR-223-5p, miR-154b-5p, miR-331-5p, miR-141-3p, miR-125a, miR-874-3p, miR-410-3p, miR-592, miR-134-5p, miR-486b-3p, miR-204-5p, miR-331-3p, miR-100-3p, miR-125b-5p, miR-26c, miR-6740-5p, miR-3969, miR-370-5p, miR-378c, miR-322-3p, miR-93, miR-6128, miR-103b, let-7d, miR-320, miR-34c-5p, miR-34b, miR-1260b, miR-9-3p, miR-449a, miR-409b, miR-1260b, miR-34b-5p, miR-34a-5p, miR-9-3p, miR-485-5p, miR-1260a, miR-34c

KCNJ8 ENSOARGO(potassium) miR-2300a-5p, miR-2331-3p, miR-324-3p

PPP1R14D ENSOARGO(protein) miR-876-3p, miR-625-5p, miR-7862, miR-3064-5p, miR-1343-3p, novel\_69, miR-144-3p, miR-6535, miR-2355-3p, miR-6119-5p, miR-144, miR-3085-3p, miR-203b-5p, miR-214-3p, miR-486b-3p, miR-3064-5p, miR-495-5p, miR-214, miR-877-3p, miR-486-3p

TNK2 ENSOARGO(tyrosine) miR-2300a-5p, miR-2331-3p, miR-324-3p

VPS18 ENSOARGO(vacuolar) miR-876-3p, miR-625-5p, miR-7862, miR-3064-5p, miR-1343-3p, novel\_69, miR-144-3p, miR-6535, miR-2355-3p, miR-6119-5p, miR-144, miR-3085-3p, miR-203b-5p, miR-214-3p, miR-486b-3p, miR-3064-5p, miR-495-5p, miR-214, miR-877-3p, miR-486-3p

|        |                    |                                                                                                                                                                                                                                                                                                                                                                                                                                                                                                                                                                                                                                                                                                                                                                                                                                                                                                                                                                                                                                                                                                                                                                                                                                                                                                                                                                                                                                                                                                                                                                                                                                                                         |
|--------|--------------------|-------------------------------------------------------------------------------------------------------------------------------------------------------------------------------------------------------------------------------------------------------------------------------------------------------------------------------------------------------------------------------------------------------------------------------------------------------------------------------------------------------------------------------------------------------------------------------------------------------------------------------------------------------------------------------------------------------------------------------------------------------------------------------------------------------------------------------------------------------------------------------------------------------------------------------------------------------------------------------------------------------------------------------------------------------------------------------------------------------------------------------------------------------------------------------------------------------------------------------------------------------------------------------------------------------------------------------------------------------------------------------------------------------------------------------------------------------------------------------------------------------------------------------------------------------------------------------------------------------------------------------------------------------------------------|
| MAN1A2 | ENSOARGO(mannosid. | <p>miR-196a-3p, miR-30b, miR-618, miR-345-3p, miR-320d, miR-30d, miR-216c-5p, miR-2285w, miR-345-3p, miR-29b-1-5p, miR-125b-2-3p, miR-143-3p, miR-30c-5p, miR-2300b-3p, miR-193b-5p, miR-4429, miR-30d-3p, miR-485-3p, miR-487a-3p, miR-148b-3p, miR-2284h-5p, miR-2285j, miR-151-3p, miR-487b-5p, miR-129-5p, miR-130b-5p, miR-539-5p, miR-145a-3p, miR-4510, miR-6525, miR-6134, miR-30d-5p, miR-487b-5p, miR-30f, miR-18a-5p, miR-496-3p, miR-32-3p, miR-552-3p, miR-6130, novel_32, novel_25, miR-320b, miR-431-5p, miR-29b-1-5p, miR-487b-5p, miR-2330-5p, miR-758-3p, miR-484, miR-143-5p, miR-30b-3p, miR-758-3p, miR-2426, miR-16-2-3p, miR-151a-3p, miR-1343-3p, miR-330-3p, miR-2320-3p, miR-500-5p, miR-126a-5p, miR-30b-5p, miR-2440, miR-628-3p, miR-32-3p, miR-9-5p, miR-452-5p, miR-362-5p, miR-129b-5p, novel_94, miR-20a-3p, miR-7857-3p, miR-203-3p, miR-4443, miR-454-5p, miR-2285af, miR-125a-3p, miR-3071-3p, miR-450a-2-3p, miR-107, miR-152-3p, miR-4286, miR-2478, miR-345-3p, miR-3591-5p, miR-23b-5p, miR-30a-5p, miR-30c, miR-496, miR-376a-5p, miR-431, miR-18b-5p, miR-9-5p, miR-582-3p, novel_121, novel_63, miR-494-5p, miR-193a-5p, miR-500b-5p, miR-30e-5p, miR-320a, miR-18a, miR-362-5p, miR-876-3p, miR-3074-1-3p, novel_48, miR-503-3p, miR-3068-3p, miR-2355-5p, miR-331-5p, miR-330-3p, miR-2411-3p, miR-130b-5p, miR-6240, miR-539-3p, miR-1434-3p, miR-30b-3p, miR-2284x, miR-7862, miR-103a-3p, miR-26b-3p, miR-149-5p, miR-103, miR-203b-5p, miR-147-5p, miR-495-3p, novel_27, miR-2284w, miR-18b, miR-148a-3p, miR-150-5p, miR-3065-5p, miR-450b-3p, miR-107, miR-2319a, miR-376a-2-5p, novel_68, miR-3120-3p, miR-320c</p> |
| GDAP2  | ENSOARGO(ganglios  | <p>miR-1185-3p, miR-421, miR-1185-2-3p, miR-3120-3p, let-7a-2-3p, miR-455-5p, miR-2284x, let-7g-3p, novel_73, let-7g-3p, miR-196a-5p, let-7a-2-3p, miR-6134, miR-214, let-7f-2-3p, let-7f-2-3p, miR-21-3p, miR-214-3p, miR-196b-5p, miR-665, miR-455-5p</p>                                                                                                                                                                                                                                                                                                                                                                                                                                                                                                                                                                                                                                                                                                                                                                                                                                                                                                                                                                                                                                                                                                                                                                                                                                                                                                                                                                                                             |

miR-4429, miR-19b-3p, miR-193b-5p, miR-1961, miR-140-3p, miR-1434-5p, miR-5703, miR-2904, miR-124-3p, miR-15a-5p, miR-340-5p, miR-7859, miR-199a-3p, miR-548e-3p, miR-3600, miR-98-5p, miR-320d, miR-21-3p, let-7k, novel\_17, miR-210-5p, miR-196a-3p, miR-185-3p, miR-345-3p, miR-92a-1-5p, miR-216a-5p, miR-142a-3p, miR-181b-1-3p, miR-664b-3p, miR-486-3p, miR-183-5p, miR-345-5p, miR-2312, miR-186-5p, miR-2285c, miR-21a-3p, miR-139-5p, miR-499b-3p, miR-132-5p, miR-582-5p, miR-6516, miR-15b-5p, let-7i-5p, miR-660-5p, miR-30c-1-3p, miR-2331-3p, miR-552-3p, miR-21-3p, miR-17-3p, miR-450b-3p, miR-130b-5p, miR-424-5p, miR-4492, let-7f, miR-2285j, miR-665, miR-320e, miR-664a-5p, miR-151-3p, miR-224-5p, miR-142a-5p, miR-6134, let-7b-5p, miR-129-2-3p, let-7b, miR-3958-5p, miR-450b-5p, miR-2426, miR-1388-5p, miR-1839-5p, miR-125b-2-3p, miR-142-5p, miR-142-3p, miR-2285e, miR-455-3p, miR-9788-3p, novel\_78, miR-409b, miR-1343-3p, miR-151a-3p, miR-330-3p, miR-548w, miR-145b, miR-27a-3p, miR-181b-2-3p, miR-3085-3p, let-7e, miR-199b-5p, miR-320b, miR-199a-3p, miR-16b, miR-2957, miR-505, miR-30c-1-3p, miR-2310, miR-424-5p, miR-124a, let-7a-5p, miR-199b-5p, miR-489, miR-499a-3p, miR-27a-3p, let-7d-5p, miR-3064-5p, miR-139-5p, miR-211-5p, miR-335, miR-2440, miR-877-3p, miR-1285-5p, miR-9-5p, miR-181d-5p, miR-2285f, miR-582-3p, let-7d, miR-411-3p, miR-345-3p, miR-29d-3p, miR-758-5p, miR-6516-5p, miR-9-5p, miR-322-5p, miR-129-1-3p, novel\_121, miR-2285ad, miR-376a-5p, miR-1224-5p, miR-181b-5p, miR-127-5p, let-7f-5p, miR-450a-2-3p, miR-28-3p, miR-2898, miR-17-3p, miR-200a-3p, miR-2285af, miR-205-5p, let-7c-5p, miR-30c-2-3p, miR-490-3p, miR-1957a, miR-200a, let-7g, novel\_39, miR-199a-5p, miR-376c-5p, miR-181a-2-3p, miR-3064-5p, miR-345-5p, miR-485-5p, miR-1248, miR-1814c, miR-301, miR-320a, miR-3154, miR-365a-3p, miR-331-

miR-23a-3p, miR-2284b, miR-106a-5p, miR-494-3p, miR-106b-5p, miR-320b, miR-326, miR-103a-2-5p, miR-3085-3p, miR-5010-3p, miR-181b-2-3p, novel\_4, miR-105-1, novel\_78, miR-148b-5p, miR-9788-3p, miR-500-5p, miR-216a-3p, miR-455-3p, miR-496-5p, miR-412-3p, miR-7857, miR-30b-3p, miR-3962, miR-6529a, miR-143-5p, miR-101c, miR-1388-5p, miR-452-5p, miR-2447, miR-219a-2-3p, miR-362-5p, miR-107-5p, novel\_82, miR-2440, miR-2285t, miR-374a-3p, miR-374b-5p, miR-7689-3p, miR-211-5p, miR-139-5p, miR-2284g, miR-3064-5p, miR-454-5p, miR-378g, miR-3082-5p, miR-2483-3p, miR-129b-5p, miR-493-5p, miR-20a, miR-216c-5p, miR-486-3p, miR-380-3p, miR-376a-5p, miR-125b-2-3p, miR-181b-1-3p, miR-500a-5p, miR-216a-5p, miR-345-3p, miR-374a-5p, miR-26a-5p, miR-30d, miR-21-3p, miR-106a, miR-320d, miR-760-3p, miR-3600, miR-212-5p, miR-30d-3p, miR-548e-3p, miR-106a, miR-23b-3p, miR-7859, miR-23c, miR-1434-5p, miR-1193, miR-5703, miR-376a-5p, miR-2300b-3p, miR-16-1-3p, miR-664-5p, miR-148a-5p, miR-361-5p, miR-2284u, miR-4429, miR-3074-2-3p, miR-665-5p, miR-145a-3p, miR-4510, miR-6134, miR-6525, miR-224-5p, miR-30a-3p, miR-219b-3p, miR-3604, miR-320e, miR-30e-3p, miR-500, miR-208b-5p, miR-6516-3p, miR-496-3p, miR-22-3p, novel\_25, miR-204-3p, miR-877-5p, miR-582-5p, miR-27a-5p, miR-139-5p, miR-6130, miR-500a-3p, miR-27b-5p, miR-30d-5p, miR-411, miR-625-5p, novel\_99, miR-186-5p, miR-18a-5p, miR-345-5p, miR-101-5p, miR-628-5p, miR-493-5p, let-7j, miR-345-5p, miR-432-3p, miR-432-3p, miR-105-5p, miR-106a-5p, miR-17-5p, miR-455-5p, miR-2411-3p, miR-224-5p, miR-1343-5p, miR-3955-5p, miR-133b-5p, miR-6238, miR-20b, miR-2355-3p, miR-432-5p, miR-134-3p, miR-22-3p, miR-432, miR-455-5p, miR-188-5p, miR-380-3p, miR-30b-3p, miR-16-1-3p, miR-219a-1-3p, miR-326-3p, miR-2285m, miR-2284w, miR-2428, miR-211, miR-21-3p, miR-3959-3p, miR-20a-5p, miR-6119-3p, miR-26b-5p, miR-186-5p, miR-1814c, miR-3074-1-3p, miR-625-5p, miR-23b, miR-503-3p, let-7f-1-3p, miR-6130, miR-544-3p, miR-216b-3p, miR-32-3p, miR-28-5p, miR-130b-5p, miR-708-5p, miR-6516-3p, miR-3969, miR-19b-1-5p, miR-222-3p, miR-1-5p, let-7b-3p, miR-1197-3p, miR-98-3p, miR-144-5p, miR-3958-5p, miR-4510, miR-3184-3p, miR-361-5p, let-7a-3p, miR-664-5p, miR-105-2, miR-411-3p, miR-98-3p, novel\_121, miR-328-3p, miR-2284h-5p, miR-23c, miR-23b-3p, miR-1224-5p, miR-222, miR-2484, miR-1a-2-5p, miR-216a-5p, miR-26a-5p, miR-192-3p, miR-450b-5p, miR-6395, miR-335-3p, miR-2319a, miR-1291, miR-410-5p, miR-381-3p, miR-221, miR-1185-2-3p, miR-144-5p, miR-6535, miR-26b-5p, miR-379-3p, novel\_87, miR-382-5p, miR-154a, miR-495-3p, miR-1a-1-5p, miR-32-3p, miR-16-2-3p, miR-544a, miR-2426, miR-19b-2-5p, miR-1185-3p, miR-9788-3p, miR-455-3p, miR-6238, miR-221-3p, miR-105-1, miR-330-3p, miR-105-5p, miR-2310, miR-1b-5p, miR-491-3p, miR-2284l, let-7f-2-3p, let-7f-2-3p, miR-23a-3p, miR-6240, miR-130b-5p

NUSAP1 ENSOARGO(nucleola) miR-26a-5p, miR-1306-5p, miR-26b-5p, miR-495-3p, miR-499b-5p, miR-370-3p

PAK2 ENSOARGO(p21 prot) miR-26a-5p, miR-1306-5p, miR-26b-5p, miR-495-3p, miR-499b-5p, miR-370-3p

SENP5 ENSOARGO(SUMO1/se) miR-26a-5p, miR-1306-5p, miR-26b-5p, miR-495-3p, miR-499b-5p, miR-370-3p



miR-20a-3p, miR-139-5p, miR-664b, miR-499b-5p, miR-3596, miR-499a-3p, let-7d-5p, miR-199b-5p, miR-140-5p, miR-381-3p, miR-136-5p, miR-3963, miR-9-3p, miR-1983, miR-376a-3p, miR-335-3p, miR-493-5p, miR-9-5p, miR-452-5p, miR-181d-5p, miR-9-3p, miR-218-5p, miR-382-3p, miR-107-5p, miR-769-5p, miR-3958-3p, miR-4726-5p, miR-499a-5p, miR-154-3p, miR-2285t, miR-1343-3p, miR-142-5p, miR-153, miR-411b-5p, miR-6529a, miR-2426, miR-1388-5p, miR-101c, miR-1839-5p, miR-2284aa, miR-101b-3p, let-7a-5p, miR-23a-3p, miR-2310, miR-8485, miR-3187-3p, miR-193a, miR-182-5p, miR-29b-1-5p, miR-3955-3p, miR-103a-2-5p, let-7e, miR-153-3p, miR-199b-5p, miR-496-3p, miR-548o-3p, miR-140-5p, miR-221-5p, miR-296-3p, miR-182-5p, miR-21-3p, miR-154a-3p, miR-323-5p, miR-139-5p, miR-6130, miR-499b-3p, let-7i-5p, novel\_25, miR-450a-1-3p, miR-433-3p, miR-154b-3p, miR-345-5p, miR-186-5p, novel\_99, miR-1827, miR-4510, miR-145a-3p, let-7b, miR-590-3p, miR-539-5p, miR-425-5p, miR-142a-5p, miR-769-5p, miR-181c-5p, let-7b-5p, miR-122-5p, miR-15b-3p, let-7f, miR-29b-2-5p, miR-3604, miR-19b-1-5p, miR-17-3p, miR-451a, miR-450b-3p, miR-130b-5p, miR-4492, miR-548e-3p, miR-485-3p, miR-148b-3p, miR-23c, miR-7859, miR-487a-3p, miR-23b-3p, miR-2366, miR-1961, miR-2300b-3p, novel\_133, miR-217-5p, miR-5703, miR-140-3p, miR-142-3p, miR-378d, miR-487a, miR-216c-5p, miR-345-3p, miR-29b-1-5p, miR-2424, miR-486-3p, miR-26a-5p, miR-618, miR-196a-3p, miR-92a-1-5p, miR-412-5p, miR-219b-5p, miR-500a-5p, miR-98-5p, let-7k, miR-2484, miR-1277-5p, miR-30b-3p, miR-221-5p, miR-26b-5p, miR-320b, miR-411b-3p, miR-323a-5p, miR-144-3p, miR-669, miR-148a-3p, miR-376b-3p, miR-3591-3p, miR-378b, miR-412-3p, let-7e-5p, miR-6516-3p, miR-17-3p, miR-2285x, miR-323c, miR-24-3p, miR-199b-5p, miR-2284w, miR-133a-5p, miR-112-5p, let-7i, miR-185-3p, miR-6110-3p, miR-509b, miR-200c, miR-2285p, miR-26a-5p, miR-105-5p, miR-200c-3p, miR-329a-5p, miR-628-5p, miR-223-3p, miR-143-5p, miR-125b-2-3p, miR-2284ab, miR-300, miR-200b-3p, miR-105-2, miR-27b-3p, miR-105-1, miR-429-3p, miR-27a-3p, miR-1185-3p, miR-2332, miR-3604, miR-539-5p, miR-2284v, miR-381-3p, miR-329b, novel\_94, miR-877-3p, miR-2331-3p, miR-329-5p, miR-2285aa, miR-7-1-3p, miR-26b-5p, miR-3120-3p, miR-27a-3p, miR-1185-2-3p

YEATS4 ENSOARGO(YEATS do)

ACSL3 ENSOARGO(acyl-CoA)

miR-18a-3p, miR-23c, miR-23b-3p, miR-328-3p, novel\_73, miR-361-5p, miR-148a-5p, miR-16-1-3p, miR-664-5p, miR-133a-3p, miR-329a-5p, miR-142a-3p, miR-377-5p, miR-421-5p, miR-486-3p, miR-210-5p, miR-92a-1-5p, miR-345-3p, miR-324-3p, miR-548o-3p, miR-32-5p, miR-504-5p, miR-30c-1-3p, miR-2331-3p, miR-296-3p, miR-552-3p, miR-216b-5p, miR-2284s, miR-377-3p, miR-15b-5p, miR-450a-1-3p, miR-30d-5p, miR-433-3p, miR-500a-3p, miR-625-5p, miR-1895, miR-129-2-3p, miR-3074-5p, miR-214, miR-665-5p, miR-3958-5p, miR-224-5p, miR-769-5p, miR-3184-5p, miR-664a-5p, miR-665, miR-500, miR-1343-3p, miR-147a, miR-425-3p, miR-421, miR-1185-3p, miR-2459, miR-148b-5p, miR-455-3p, miR-301b-5p, miR-2284r, miR-329-3p, miR-362-3p, miR-1839-5p, miR-124a, miR-1388-3p, miR-744-3p, miR-23a-3p, miR-2310, miR-431-5p, miR-16b, miR-487b-5p, miR-491-5p, miR-214-3p, miR-146b, miR-2319b, miR-139-5p, miR-3596, miR-25, miR-378g, miR-1185-2-3p, miR-4443, miR-144-5p, miR-140-5p, miR-504, miR-96-5p, miR-1983, miR-335-3p, miR-363-3p, miR-3956-3p, miR-2447, novel\_111, miR-361-3p, miR-7705, miR-423-5p, novel\_82, miR-301a-5p, miR-3968, miR-3964, miR-429-3p, miR-2285ad, miR-431, miR-1224-5p, miR-412, miR-322-5p, miR-505-5p, miR-129-1-3p, novel\_121, miR-450a-1-3p, miR-3591-5p, miR-330-5p, miR-1343-5p, miR-92b-3p, novel\_39, miR-29a-5p, miR-205-5p, novel\_96, miR-200a-3p, novel\_127, miR-2355-5p, miR-25-3p, miR-331-5p, miR-301, miR-30e-5p, miR-23b, miR-329a, miR-329b, miR-876-3p, novel\_42, miR-144-5p, miR-16-5p, miR-1260b, miR-1197-3p, novel\_9, miR-3431, miR-134-3p, miR-149-5p, novel\_116, miR-7b-5p, miR-432, novel\_23, miR-450c-3p, miR-22-3p, miR-16-1-3p, miR-16b, miR-188-5p, miR-26a-2-3p, miR-497-5p, miR-668-3p, miR-2284l, miR-432-3p, let-7a-2-3p, let-7j, miR-377-3p, miR-296-3p, miR-146a, miR-7-5p, novel\_51, miR-2411-3p, miR-22, miR-192a-3p, miR-216b-3p, miR-3074-5p, miR-8095, miR-758-3p, miR-2285r, miR-181b-1-3p, miR-23a-3p, miR-129-5p, miR-320d, miR-6119-3p, miR-3071-3p, miR-3604, miR-320b, miR-618, miR-320c, miR-677, miR-22-3p, miR-181b-3p, miR-23b-3p, miR-383-5p, miR-23c, miR-541-5p, miR-181b-2-3p, miR-32-3p, miR-4429, miR-22-3p, miR-23b, miR-320a, miR-129b-5p, miR-758-3p

RPAP1

ENSOARGO(RNA poly)

WARS2

ENSOARGO(tryptoph)

|         |                    |                                                                                                                                                                                                                                                                                                                                                                                                                                                                                                                                                                                                                                                                                                                                                                                                                                                                                                                                                                                                                                                                                                                                                                                                                                                                                                                     |
|---------|--------------------|---------------------------------------------------------------------------------------------------------------------------------------------------------------------------------------------------------------------------------------------------------------------------------------------------------------------------------------------------------------------------------------------------------------------------------------------------------------------------------------------------------------------------------------------------------------------------------------------------------------------------------------------------------------------------------------------------------------------------------------------------------------------------------------------------------------------------------------------------------------------------------------------------------------------------------------------------------------------------------------------------------------------------------------------------------------------------------------------------------------------------------------------------------------------------------------------------------------------------------------------------------------------------------------------------------------------|
|         |                    | novel_4, novel_78, miR-1343-3p, miR-339-5p, miR-134-3p, miR-2355-3p, miR-541, miR-329-3p, miR-22-3p, miR-501-3p, miR-1260b, miR-29b, miR-362-3p, miR-127-3p, miR-382-3p, miR-494-3p, miR-744-3p, miR-676-3p, miR-8485, miR-1306-5p, novel_51, miR-29b-1-5p, miR-362-3p, miR-193a-3p, miR-125a-5p, miR-660, miR-4792, miR-3120-3p, miR-29a-3p, miR-378g, miR-500-3p, miR-148a-3p, miR-3591-3p, miR-216a-3p, miR-18a-3p, miR-1306, miR-1291, novel_94, miR-541-3p, miR-495-3p, miR-29c-3p, miR-193b-3p, miR-2428, miR-8095, miR-502-3p, miR-29a, miR-502b, miR-2284q, miR-374a-3p, miR-18a-3p, novel_79, miR-148b-3p, miR-582-3p, miR-134-5p, miR-362-3p, miR-134, miR-3578, miR-501-3p, miR-5703, miR-29d-3p, miR-128-3p, miR-155-5p, miR-183-5p, miR-376c-3p, miR-29b-1-5p, miR-490-3p, miR-1260a, miR-2285af, miR-339a, miR-125b, miR-216a-5p, novel_127, miR-152-3p, miR-21-3p, miR-30b-3p, miR-874-3p, miR-660-5p, miR-552-3p, miR-125a, miR-21-3p, miR-2355-5p, miR-193b-3p, miR-376e-3p, miR-376c-3p, miR-155-5p, miR-22-3p, miR-324-5p, miR-424-3p, miR-3154, miR-329a, miR-339b, miR-329b, miR-767, miR-485-5p, miR-190a-3p, miR-539-5p, miR-1260b, miR-374a-3p, miR-2332, miR-29b-3p, miR-409-3p, miR-6740-5p, miR-125b-5p, miR-767-5p, miR-664a, miR-155-5p, miR-134-5p, miR-374b-3p, miR-874-5p, miR-4492 |
| BDH1    | ENSOARGO( 3-hydrox |                                                                                                                                                                                                                                                                                                                                                                                                                                                                                                                                                                                                                                                                                                                                                                                                                                                                                                                                                                                                                                                                                                                                                                                                                                                                                                                     |
|         |                    | miR-296-3p, miR-2411, miR-211, miR-6240, miR-204-5p, miR-22-5p, miR-330-3p, miR-296-3p, miR-2411-5p, miR-296-3p, miR-211-5p, miR-7689-3p, miR-330-3p, miR-140-5p, miR-218-1-3p, miR-136-5p, miR-876-3p                                                                                                                                                                                                                                                                                                                                                                                                                                                                                                                                                                                                                                                                                                                                                                                                                                                                                                                                                                                                                                                                                                              |
| APOD    | ENSOARGO( apolipop |                                                                                                                                                                                                                                                                                                                                                                                                                                                                                                                                                                                                                                                                                                                                                                                                                                                                                                                                                                                                                                                                                                                                                                                                                                                                                                                     |
|         |                    | miR-6240, miR-216c-5p, miR-628-5p, miR-744-3p, miR-101-5p, miR-2284l, miR-654-3p, miR-2310, miR-2424, miR-210-5p, miR-330-3p, miR-500a-5p, miR-17-3p, miR-2284m, miR-299-3p, miR-543-5p, miR-103a-2-5p, miR-107, miR-330-3p, miR-103a-3p, miR-548e-3p, miR-299a-3p, miR-1298-3p, miR-7859, miR-103, miR-149-5p, miR-450b-5p, miR-2284x, miR-2284v, miR-2284j, miR-17-3p, miR-6128, miR-877-3p, miR-7705, miR-15b-3p, miR-2284k, miR-107-5p, miR-382-5p, miR-17-3p, novel_74, miR-22-5p, miR-452-3p, novel_68, miR-2285aa, miR-299b-3p, miR-433-3p, miR-378b, miR-107, novel_99, miR-186-5p, miR-1814c, miR-3074-1-3p                                                                                                                                                                                                                                                                                                                                                                                                                                                                                                                                                                                                                                                                                                |
| SLC01A2 | ENSOARGO( solute c |                                                                                                                                                                                                                                                                                                                                                                                                                                                                                                                                                                                                                                                                                                                                                                                                                                                                                                                                                                                                                                                                                                                                                                                                                                                                                                                     |

miR-6240, miR-432-3p, miR-654-3p, miR-432-3p, miR-2411-3p, miR-105-5p, miR-330-3p, miR-26b-3p, miR-339-5p, miR-133b-5p, miR-31-5p, novel\_23, miR-374b-3p, miR-145a-5p, miR-197-3p, miR-181a-5p, miR-188-5p, miR-27b-3p, miR-497-5p, miR-16-1-3p, miR-219a-1-3p, miR-30b-3p, miR-2284ab, novel\_101, miR-219b-3p, miR-2284w, miR-2428, novel\_27, miR-3959-3p, miR-211, novel\_87, miR-6402, miR-142b, miR-208a-3p, miR-15a, miR-147-5p, miR-22-5p, miR-421-5p, novel\_1, miR-3120-3p, miR-26b-5p, miR-320c, miR-144-3p, miR-374c-3p, miR-2404, miR-3065-5p, miR-378b, miR-150-5p, miR-6516-3p, miR-195a-5p, miR-2319a, miR-9851-3p, miR-412-3p, miR-19a-3p, miR-1291, miR-2285b, novel\_39, miR-200a, miR-2478, miR-339a, miR-30f, miR-200c, miR-205-5p, miR-200a-3p, miR-181b-5p, miR-200c-3p, novel\_79, miR-429-3p, miR-9-5p, miR-322-5p, miR-30a-5p, miR-218-2-3p, miR-345-3p, miR-105-2, miR-200b-3p, miR-30c, miR-300, miR-144, miR-2332, miR-34c-3p, novel\_63, miR-486b-3p, miR-204-5p, miR-28-5p, miR-141-3p, miR-2285aa, miR-223-5p, miR-365a-3p, miR-300-3p, miR-320a, miR-3154, miR-200a-5p, miR-381-3p, miR-30e-5p, miR-7144-5p, miR-329a, miR-2318, miR-652-5p, miR-23a-3p, miR-101b-3p, miR-424-5p, miR-124a, miR-1388-3p, miR-362-3p, novel\_115, miR-320b, miR-145b, miR-27a-3p, miR-105-1, miR-199b-3p, miR-421, miR-1185-3p, miR-9788-3p, miR-539-5p, miR-30b-3p, miR-1298-5p, miR-329-3p, miR-21b, miR-101c, miR-362-3p, miR-9-5p, miR-181d-5p, miR-9-3p, novel\_111, miR-30b-5p, miR-490-5p, miR-3958-3p, miR-211-5p, miR-2319b, miR-139-5p, miR-1185-2-3p, miR-4443, miR-27a-3p, miR-203-3p, miR-3082-5p, miR-3596, miR-378j, miR-381-3p, miR-1983, miR-9-3p, miR-345-3p, miR-369-3p, miR-2285w, miR-486-3p, miR-2432, miR-421-5p, miR-345-3p, miR-26a-5p, miR-208b-3p, miR-2285p, miR-374a-5p, miR-196a-3p, miR-30b, miR-1277-5p, miR-30d, miR-166i-5p, miR-320d, miR-2284m, miR-377-3p, miR-3068-3p, miR-548o-3p, miR-141-3p, miR-2285aa, let-7g-3p, miR-10b-3p, let-7g-3p, miR-671-5p, novel\_99, novel\_48, miR-543-3p, miR-381-3p, miR-1197-3p, miR-6525, miR-181c-5p, miR-129-2-3p, miR-28a-3p, miR-374b, miR-6128, miR-6516-3p, miR-130b-5p, miR-222-3p, miR-665, miR-30a-3p, miR-331-3p, miR-148b-3p, miR-95-3p, miR-129-1-3p, novel\_121, miR-2284z, miR-532-3p, miR-222, miR-30d-3p, miR-300, miR-411-3p, miR-378d, let-7a-2-3p, miR-128-3p, miR-2366, miR-376a-5p, miR-188-3p, miR-130a-5p, miR-376a-5p, miR-450b-5p, miR-29a-5p, miR-329a-5p, miR-30a-3p, miR-181b-5p, miR-450a-2-3p, miR-28-3p, miR-200a-3p, miR-152-3p, miR-21-3p, miR-107, miR-210-5p, miR-26a-5p, miR-618, miR-374c-3p, miR-378g, miR-329-5p, miR-26b-5p, miR-7-1-3p, miR-374b-5p, miR-541-5p, miR-499b-5p, miR-107, miR-877-3p, miR-6516-3p, miR-221, miR-148a-3p, miR-361-3p, miR-378b, miR-378j, miR-216a-3p, miR-150-5p, novel\_111, miR-361-3p, miR-8095, novel\_27, miR-3059-5p, miR-181d-5p, miR-379-3p, miR-6119-3p, miR-421-5p, miR-218-5p, miR-107-5p, miR-539-5p, miR-1298-3p, miR-134-3p, miR-153, miR-103, miR-221-3p, miR-1343-3p, miR-103a-3p, miR-450b-5p, miR-2284aa, miR-181a-5p, miR-484, miR-6529a, let-7a-2-3p, miR-101b-3p, miR-130b-5p, miR-628-5p, miR-378a-5p, miR-103a-2-5p, miR-153-3p, miR-377-3p, novel\_103, miR-505

miR-214-3p, miR-146b, miR-377-3p, miR-146a, miR-326, miR-8485, miR-628-5p, miR-744-3p, miR-23a-3p, miR-382-3p, miR-27b-3p, miR-3120-5p, miR-544a, miR-873a-5p, miR-484, miR-544b, miR-221-3p, miR-134-3p, miR-425-3p, miR-26b-3p, miR-27a-3p, novel\_4, miR-3968, novel\_87, miR-2285y, miR-2285n, miR-218-5p, miR-326-3p, miR-361-3p, novel\_101, miR-495-3p, miR-2285x, miR-219a-5p, miR-505-3p, miR-146b-5p, miR-378j, miR-18a-3p, miR-221, miR-361-3p, miR-27a-3p, miR-378g, miR-2404, miR-20a-3p, miR-3074-5p, novel\_68, miR-21-

FOXJ3 ENSOARGOC forkhead 3p, novel\_127, miR-760-3p, miR-217, miR-618, novel\_17, miR-146a-5p, miR-376a-5p, miR-2403, miR-2385-3p, miR-30a-3p, miR-217-5p, miR-1197-5p, miR-330-5p, miR-2408, miR-2300b-3p, novel\_121, miR-340-5p, miR-23c, miR-24-2-5p, miR-23b-3p, miR-7859, miR-505-3p, miR-30d-3p, miR-548e-3p, miR-222, miR-2285ad, miR-18a-3p, miR-28-5p, miR-708-5p, miR-338-5p, miR-30a-3p, miR-324-3p, miR-30e-3p, novel\_63, miR-222-3p, miR-425-5p, miR-214, miR-3607-3p, miR-3074-5p, miR-625-5p, miR-7144-5p, miR-10b-3p, miR-23b, miR-200a-5p, miR-21a-3p, novel\_32, miR-365a-3p, miR-544-3p, miR-377-3p miR-484, miR-544a, miR-199b-3p, miR-105-1, miR-151a-3p, miR-1298-3p, miR-505, miR-326, miR-3085-3p, miR-23a-3p, miR-3187-3p, miR-378j, miR-544-5p, miR-335-3p, miR-668-5p, miR-10b, miR-3064-5p, miR-2483-3p, miR-378g, miR-25, miR-382-3p, miR-2284q, miR-1843a-3p, miR-3968, miR-499a-5p, miR-181d-5p, miR-3956-3p, novel\_60, miR-877-3p, miR-140-3p, miR-133a-3p, novel\_83, miR-151-5p, miR-200b, miR-23c, miR-23b-3p, miR-210-5p, miR-2285p, miR-2484, miR-221-5p, miR-466i-5p, miR-2887, miR-5100, miR-183-5p, miR-421-5p, miR-21a-3p, miR-1895, miR-133b-3p, let-7g-3p, miR-3065-3p, miR-221-5p, miR-2331-3p, miR-151b, miR-193b-3p, miR-544-3p, miR-132-5p, miR-151-3p, miR-2285j, miR-130b-5p, miR-874-5p, miR-17-3p, miR-338-3p, miR-181c-5p, miR-122-5p, miR-542-3p, miR-181a-5p, miR-

WDFY1 ENSOARGOC WD repea 2113, miR-29b, miR-26b-3p, miR-340-3p, miR-2355-3p, miR-544b, miR-149-5p, miR-134-3p, miR-3431, novel\_51, miR-105-5p, miR-197-5p, miR-193a-3p, miR-452-5p, miR-378a-5p, miR-483-3p, miR-130b-5p, let-7a-2-3p, miR-3065-5p, miR-378b, miR-320b, miR-329-5p, miR-411b-3p, miR-29a-3p, miR-199c, miR-29a, miR-29c-3p, miR-17-3p, miR-193b-3p, miR-219b-3p, miR-326-3p, miR-1307-3p, miR-24-3p, miR-330-5p, miR-23b-5p, miR-29d-3p, let-7a-2-3p, miR-105-2, miR-200b-3p, miR-429-3p, miR-486-5p, miR-214-5p, miR-2284z, miR-483-3p, miR-181c-3p, miR-200c, miR-125a-3p, miR-2285af, miR-200c-3p, miR-181b-5p, miR-17-3p, miR-3064-5p, miR-29a-5p, miR-200a, miR-3065-3p, miR-23b, miR-485-5p, miR-23a-5p, let-7g-3p, miR-2318, miR-329b, miR-767, miR-542-5p, miR-2355-5p, miR-574-5p, miR-365a-3p, miR-3969, miR-29b-3p, miR-410-3p, miR-767-5p, miR-133a-3p

miR-769, miR-331-5p, miR-300-3p, miR-1271, miR-125a, miR-141-3p, miR-370-3p, miR-3068-3p, miR-874-3p, miR-574-5p, miR-1248, miR-7144-5p, miR-2318, miR-2474, miR-3154, miR-301, miR-488-3p, miR-365a-5p, miR-1260b, miR-133a-3p, miR-103b, miR-2284v, miR-28a-3p, miR-409-3p, miR-3969, miR-125b-5p, miR-2332, miR-410-5p, miR-29b-3p, miR-2284k, novel\_121, miR-758-5p, miR-6516-5p, miR-302a-5p, novel\_79, miR-7641, miR-299a-3p, miR-10a-5p, miR-330-5p, miR-29d-3p, miR-1290, miR-345-3p, miR-1271-3p, novel\_39, miR-28b, miR-30a-3p, miR-200a-3p, novel\_127, miR-127-5p, miR-17-3p, miR-28-3p, miR-339a, miR-3071-3p, miR-30c-2-3p, miR-8117, miR-664-3p, miR-6119-5p, miR-1260a, miR-6535, novel\_69, miR-299b-3p, miR-29a-3p, miR-146b-3p, miR-10a-5p, miR-3120-3p, miR-26b-5p, miR-412-3p, miR-18a-3p, miR-3065-5p, miR-3591-3p, miR-378b, miR-150-5p, miR-3970, miR-2284w, miR-326-3p, miR-24-3p, miR-3959-3p, miR-17-3p, miR-29c-3p, miR-495-3p, miR-1839-3p, novel\_120, miR-219b-3p, miR-147-5p, miR-421-5p, miR-29a, miR-28c, miR-502-5p, miR-1247-3p, miR-2355-3p, miR-3431, miR-2284d, miR-412-5p, miR-26b-3p, miR-487b-3p, miR-339-5p, miR-31-5p, miR-27b-3p, miR-2284x, miR-1260b, miR-29b, miR-2284ab, novel\_23, miR-1434-3p, miR-873a-5p, miR-653, let-7j, miR-654-3p, miR-432-3p, miR-493-5p, miR-130b-5p, miR-125a-5p, miR-378a-5p, miR-124-5p, novel\_51, miR-2411-3p, miR-365b-5p, miR-2285v, miR-877-5p, miR-204-3p, miR-10a, miR-499b-3p, miR-2284s, miR-6516, miR-182-5p, miR-21-3p, miR-548o-3p, miR-504-5p, miR-140-5p, miR-30c-1-3p, miR-186-5p, miR-339b, miR-133b-3p, let-7g-3p, miR-411, miR-27b-5p, miR-338-3p, miR-6134, miR-29c-5p, miR-6525, miR-769-5p, miR-10b-5p, miR-3074-2-3p, miR-145a-3p, miR-590-3p, miR-130b-5p, miR-874-5p, miR-17-3p, miR-320e, miR-30a-3p, miR-324-3p, miR-29d-5p, miR-30e-3p, miR-2284h-5p, miR-222-5p, miR-30d-3p, miR-1b-3p, miR-18a-3p, miR-218-1-3p, miR-32b-3p, miR-181b-2-3p, miR-31-5p, miR-664b, miR-677, novel\_32, miR-181b-3p, miR-222-5p, miR-218-2-3p, miR-23b-5p, miR-345-3p, miR-331-5p, miR-186-5p, miR-2285x, miR-216c-5p, miR-296-3p, miR-181b-1-3p, miR-324-3p, miR-2411-3p, miR-345-3p, miR-296-3p, miR-664-3p, miR-499a-5p, miR-331-5p

miR-1839-3p, miR-3957-3p, novel\_120, miR-449a, miR-2285m, miR-34c, novel\_87, miR-142b, miR-576-3p, miR-20a-5p, miR-625-3p, miR-421-5p, novel\_1, miR-6535, miR-374c-3p, miR-34b, miR-376b-3p, miR-2285ab, miR-378f, miR-107, miR-382, let-7a-2-3p, miR-105-5p, miR-106a-5p, miR-194a, miR-17-5p, miR-660, miR-483-3p, miR-26b-3p, miR-3955-5p, miR-133b-5p, miR-103a-3p, miR-149-5p, miR-103, miR-20b, miR-2284d, miR-2285g, miR-185-5p, miR-194-5p, miR-181a-5p, miR-2284ab, miR-2284v, miR-378c, miR-93, miR-5100, miR-410-3p, miR-487a-3p, miR-3068-3p, miR-503-3p, miR-154b-5p, miR-374c-3p, miR-34c-5p, miR-769, miR-200a-5p, miR-93-5p, miR-17-5p, miR-488-3p, miR-20b-5p, miR-671-5p, miR-485-5p, miR-1814c, let-7g-3p, miR-181a-2-3p, miR-450b-5p, miR-30c-2-3p, miR-376b-3p, miR-200c, miR-107, miR-200c-3p, miR-181b-5p, miR-2285ad, miR-429-3p, novel\_121, miR-483-3p, miR-378h, miR-218-2-3p, miR-1290, miR-105-2, miR-200b-3p, let-7a-2-3p, miR-496, miR-2285f, miR-181d-5p, miR-194b-5p, miR-32-3p, novel\_60, miR-3059-5p, miR-3956-3p, miR-7705, novel\_111, miR-769-5p, miR-2285y, miR-301a-5p, miR-382-3p, miR-2285n, miR-2440, miR-139-5p, miR-4443, miR-378e, miR-7857-3p, miR-129b-5p, miR-106a-5p, miR-1839-3p, miR-382-3p, miR-193a, miR-3187-3p, miR-758-3p, miR-2310, miR-30c-1-3p, miR-378d, miR-2957, miR-29b-1-5p, miR-106b-5p, miR-153-3p, miR-1185-5p, miR-409b, miR-105-1, miR-2285e, miR-153, miR-376b-3p, miR-539-5p, miR-758-3p, miR-378b, miR-301b-5p, miR-101c, miR-378c, miR-1388-5p, miR-539-5p, miR-378c, miR-181c-5p, miR-769-5p, miR-338-5p, miR-2285j, miR-15b-3p, miR-30c-1-3p, miR-378a-3p, miR-496-3p, miR-660-5p, miR-32-3p, miR-548o-3p, miR-582-5p, miR-139-5p, miR-2285c, miR-625-5p, novel\_99, miR-582-5p, miR-2312, let-7g-3p, miR-154b-3p, miR-20a, miR-487a, miR-2285w, miR-664b-3p, miR-29b-1-5p, miR-130a-5p, miR-122a, miR-618, miR-34b-

miR-135a-2-3p, miR-301b-3p, novel\_27, miR-142b, miR-20a-5p, miR-4324, novel\_87, miR-6119-3p, miR-199c, miR-26b-5p, miR-3120-3p, miR-144-3p, miR-6535, miR-148a-3p, miR-2285ab, miR-378b, miR-18a-3p, miR-19a-3p, miR-2319a, miR-6240, miR-668-3p, miR-2483-5p, miR-22841, miR-2285r, miR-17-5p, miR-106a-5p, miR-330-3p, miR-133b-5p, miR-26b-3p, miR-130a-3p, miR-412-5p, miR-20b, miR-1434-3p, miR-181a-5p, miR-2113, miR-653, miR-3071-5p, novel\_23, miR-374b-3p, miR-22-3p, miR-16-1-3p, miR-144-5p, miR-3607-3p, miR-500b-5p, miR-93, novel\_63, miR-3969, miR-144, miR-410-3p, miR-141-3p, miR-2285aa, miR-301, miR-488-3p, miR-23b, miR-17-5p, miR-362-5p, miR-93-5p, miR-137-3p, miR-1814c, miR-20b-5p, miR-1957a, miR-29a-5p, miR-127-5p, miR-181b-5p, novel\_127, miR-200a-3p, miR-152-3p, miR-7641, miR-412, miR-24-2-5p, novel\_121, miR-23b-5p, miR-582-3p, miR-2447, miR-181d-5p, miR-362-5p, miR-423-5p, miR-101-3p, miR-301a-5p, miR-139-5p, miR-7977, miR-454-5p, miR-144-5p, miR-203-3p, miR-140-5p, miR-381-3p, miR-668-5p, miR-299b-5p, miR-494-3p, miR-106a-5p, miR-101b-3p, miR-382-3p, miR-23a-3p, miR-1b-5p, miR-2310, miR-106b-5p, miR-130b-3p, miR-199b-3p, miR-330-3p, miR-5010-3p, miR-2320-3p, miR-421, miR-455-3p, miR-500-5p, miR-216a-3p, miR-301b-5p, miR-412-3p, miR-145a-3p, miR-98-3p, miR-6525, miR-181c-5p, miR-3184-5p, let-7b-3p, miR-324-3p, miR-454-3p, miR-548o-3p, miR-140-5p, miR-532-5p, miR-139-5p, miR-301a-3p, miR-204-3p, miR-22-3p, let-7f-1-3p, miR-21a-3p, miR-433-3p, miR-2312, novel\_99, miR-625-5p, miR-216c-5p, miR-20a, miR-664b-3p, miR-380-3p, miR-26a-5p, miR-185-3p, miR-500a-5p, miR-106a, miR-106a, miR-18a-3p, miR-548e-3p, miR-212-5p, miR-148b-3p, miR-23c, miR-487a-3p, miR-23b-3p, miR-7859, miR-2408, miR-1434-5p, miR-98-3p, miR-19b-3p, novel\_73, let-7a-3p, miR-16-1-3p, miR-31-5p, miR-106a, miR-130a-3p, miR-505-3p, miR-26b-3p, miR-181b-2-3p, miR-539-5p, novel\_121, miR-20b, miR-653, miR-345-3p, miR-33b-3p, miR-155-5p, let-7a-3p, miR-3529-3p, miR-106a-5p, miR-20a, miR-668-3p, miR-2478, miR-181b-1-3p, miR-296-3p, miR-26a-5p, miR-296-3p, miR-219-3p, miR-106b-5p, miR-106a-5p, miR-2411-3p, miR-17-5p, miR-345-3p, miR-1185-5p, miR-106a, miR-26b-5p, miR-374c-3p, miR-301a-3p, miR-3082-5p, miR-677, miR-203-3p, miR-181b-3p, miR-155-5p, let-7f-1-3p, miR-93-5p, miR-381-3p, miR-17-5p, let-7g-3p, miR-20b-5p, miR-505-3p, novel\_99, miR-212-3p, novel\_101, miR-93, miR-219a-2-3p, miR-301b-3p, let-7b-3p, miR-20a-5p, miR-219b-3p, miR-664a-5p, novel\_74, miR-155-5p, novel\_1, miR-454-3p, miR-22-5p, miR-2957, miR-17-3p, miR-421-5p, miR-4791, miR-29d-3p, miR-29b, miR-548w, miR-3535, miR-29b-3p, miR-2285j, miR-576-3p, miR-2440, miR-17-3p, miR-29a, miR-664a, miR-767-5p, miR-452-5p, miR-29c-3p, miR-17-3p, miR-3074-2-3p, miR-2428, miR-2284w, miR-21a-3p, miR-3154, miR-3591-3p, miR-10b-3p, miR-767, miR-1827, miR-21-3p, miR-2285u, miR-3120-3p, miR-3596, miR-29a-3p



|         |                       |                                                                                                                                                                                                                                                                                                                                                                                                                                                                                                                                                  |
|---------|-----------------------|--------------------------------------------------------------------------------------------------------------------------------------------------------------------------------------------------------------------------------------------------------------------------------------------------------------------------------------------------------------------------------------------------------------------------------------------------------------------------------------------------------------------------------------------------|
|         |                       | miR-544a, miR-450c-3p, miR-542-3p, miR-6529a, miR-544b, miR-466f-3p, miR-25-5p, miR-182-5p, miR-3141, miR-377-3p, miR-199a-3p, miR-8485, let-7c-3p, miR-129b-5p, miR-2387, miR-18b, miR-3141, miR-361-3p, miR-374c-3p, miR-2404, miR-2285u, miR-3964, miR-379-3p, miR-2285y, miR-6402, miR-2285n, miR-877-3p, miR-495-3p, miR-1193, miR-3059-5p, miR-                                                                                                                                                                                            |
| KCMF1   | ENSOARG0(potassium)   | 2447, miR-496, miR-411-3p, miR-188-3p, miR-199a-3p, miR-450a-1-3p, miR-7859, miR-210-3p, miR-18b-5p, miR-2285ad, miR-21-3p, miR-30b-3p, miR-2285af, miR-130a-5p, miR-18a-5p, miR-10b-3p, let-7g-3p, miR-18a, miR-450a-1-3p, miR-204-3p, novel_32, miR-544-3p, miR-374c-3p, miR-377-3p, miR-182-5p, miR-2285aa, miR-370-5p, miR-496-3p, miR-503-3p, miR-2331-3p, novel_9, miR-450b-3p, miR-6740-5p, miR-370-5p, miR-1197-3p, miR-2285t, miR-30d, miR-30f, miR-500a-5p, miR-30b, miR-30b-5p, miR-500b-5p, miR-362-5p, let-7c-3p, miR-30c, miR-186- |
| CCDC50  | ENSOARG0(coiled-coil) | 5p, let-7g-3p, miR-30f, miR-30d-5p, miR-362-5p, miR-30a-5p, miR-30e-5p, miR-30c-5p, miR-500-5p, miR-486-5p, miR-2483-3p, miR-10b, miR-376c-3p, miR-377-5p, miR-143-3p, miR-8485, miR-382-3p, miR-3064-5p, miR-3085-3p, miR-466f-3p, miR-377-3p, miR-1260a, miR-199a-3p, miR-196a-3p, miR-92a-1-5p, miR-185-5p, miR-2459, miR-199a-3p, miR-532-3p, miR-377-5p, miR-1b-                                                                                                                                                                            |
| C1orf50 | ENSOARG0(chromosome)  | 3p, miR-665, miR-1260b, miR-142-3p, miR-2300b-3p, miR-484, miR-19b-2-5p, miR-5703, miR-1260b, novel_1, miR-6123, miR-2285t, miR-665, miR-19b-1-5p, miR-376e-3p, miR-377-3p, miR-376c-3p, miR-3064-5p, miR-877-3p, miR-1248, miR-21a-3p, miR-433-3p                                                                                                                                                                                                                                                                                               |

miR-235b-3p, miR-7862, miR-30b-3p, miR-29b, miR-3071-5p, miR-450c-3p, miR-7b-5p, miR-1843b-5p, miR-181a-5p, miR-223-3p, miR-345-5p, miR-432-3p, miR-432-3p, miR-130b-5p, miR-124-5p, miR-378a-5p, miR-2411-3p, miR-7-5p, miR-181b-3p, miR-320c, miR-677, miR-670-3p, miR-29a-3p, miR-655-5p, miR-505-3p, miR-6516-3p, miR-2319a, miR-450b-3p, miR-3065-5p, miR-3591-3p, miR-378b, miR-29c-3p, miR-17-3p, miR-335-5p, miR-22-5p, miR-29a, miR-502-5p, miR-450a-1-3p, miR-134-5p, miR-6516-5p, miR-758-5p, miR-9-5p, miR-7641, miR-29d-3p, miR-134, miR-345-3p, miR-2285b, novel\_39, miR-181b-5p, miR-127-5p, miR-450a-2-3p, miR-28-3p, miR-17-3p, miR-219-3p, miR-664-3p, miR-215-5p, miR-671-5p, miR-3074-1-3p, miR-345-5p, miR-10b-3p, miR-320a, miR-301, miR-323-3p, miR-103b, miR-28a-3p, miR-134-5p, miR-3969, miR-409-3p, miR-6740-5p, miR-29b-3p, miR-1185-3p, miR-216a-3p, miR-455-3p, miR-181b-2-3p, miR-2300a-5p, miR-1343-3p, miR-16-2-3p, miR-30b-3p, miR-323b, miR-143-5p, miR-3187-3p, miR-376b, miR-494-3p, miR-182-5p, miR-323b-3p, miR-505, miR-320b, miR-1185-2-3p, miR-2483-3p, miR-664b, miR-9-3p, novel\_94, miR-154a, miR-219a-2-3p, miR-361-3p, miR-452-5p, miR-9-5p, miR-181d-5p, miR-3956-3p, novel\_60, miR-335, miR-499a-5p, miR-3958-3p, miR-2440, miR-218-5p, miR-382-3p, miR-340-5p, miR-505-3p, miR-3600, miR-133a-3p, miR-4429, miR-5703, miR-2366, miR-376a-5p, miR-1246, miR-215-5p, miR-2432, miR-181b-1-3p, miR-130a-5p, miR-664b-3p, miR-195a-3p, miR-221-5p, miR-1277-5p, miR-320d, miR-345-3p, miR-210-5p, novel\_25, miR-6516, miR-192-5p, miR-182-5p, miR-21-3p, miR-221-5p, miR-1827, novel\_99, miR-186-5p, miR-345-5p, miR-433-3p, miR-450a-1-3p, miR-6134, miR-181c-5p, miR-6525, miR-539-5p, miR-130b-5p, miR-487a-5p, miR-6516-3p, miR-17-3p, miR-450b-3p, miR-3604, miR-338-5p, miR-132-5p, miR-219b-3p, miR-2285i

miR-4791, miR-412-3p, miR-9788-3p, miR-5010-3p, miR-1306-5p, miR-326, miR-2957, miR-4532, miR-2330-5p, miR-424-5p, miR-652-5p, miR-199b-5p, miR-361-3p, miR-129b-5p, miR-489, miR-452-3p, miR-7977, miR-2284q, miR-371a-5p, miR-769-5p, miR-541-3p, miR-3059-5p, novel\_60, miR-194b-5p, miR-2300b-3p, miR-5703, miR-2904, miR-15a-5p, miR-487a-3p, miR-383-5p, miR-505-3p, miR-485-3p, miR-30b-3p, miR-34b-5p, miR-221-5p, miR-374a-5p, miR-125b, miR-216a-5p, miR-146a-5p, miR-2432, miR-154b-3p, let-7g-3p, miR-27b-5p, miR-6130, miR-139-5p, miR-132-5p, miR-6516, miR-496-3p, miR-660-5p, miR-140-5p, miR-221-5p, miR-182-5p, miR-450b-3p, miR-708-5p, miR-424-5p, miR-338-5p, miR-338-3p, miR-6134, miR-4510, miR-145a-3p, miR-3074-2-3p, miR-29b, miR-21-5p, miR-7862, miR-873a-5p, miR-374b-3p, miR-194-5p, miR-432-5p, miR-103, miR-377-5p, miR-2285l, miR-125a-5p, miR-660, miR-654-3p, miR-6412, miR-296-3p, miR-539-3p, miR-130b-5p, miR-107, miR-450b-3p, miR-505-3p, miR-135b-5p, miR-195a-5p, miR-18a-3p, miR-21c, miR-670-3p, miR-29a-3p, miR-34b, miR-502-5p, miR-15a, miR-34c, miR-16a, miR-323c, miR-371b-3p, novel\_27, miR-449a, miR-326-3p, miR-496, miR-29d-3p, miR-6516-5p, miR-483-3p, miR-214-5p, miR-545-5p, miR-107, miR-6119-5p, miR-2285af, miR-339a, miR-380-5p, miR-28b, miR-2478, miR-199a-5p, miR-4286, miR-2385-3p, miR-3074-1-3p, miR-7144-5p, miR-376c-5p, miR-503-3p, miR-2448-3p, miR-488-3p, miR-769, miR-3965, miR-34c-5p, miR-199a-5p, miR-487a-3p, miR-141-3p, miR-615-5p, miR-28-5p, miR-410-5p, miR-29b-3p, miR-1-5p, miR-135a-5p, miR-331-3p, miR-145-3p, miR-3607-3p, miR-1388-5p, miR-541, miR-2284r, miR-421, miR-148b-5p, miR-455-3p, novel\_78, miR-1343-3p, miR-491-5p, miR-1185-5p, miR-199b-5p, miR-182-5p, miR-16b, miR-1388-3p, miR-744-3p, miR-504, miR-668-5p, miR-192-5p, miR-321-3p, miR-25, miR-144-5p, miR-129-5p, miR-345-5p, miR-345-5p, miR-103a-2-5p, miR-2387, miR-296-5p, miR-107-5p, miR-670-3p, miR-345-5p, miR-665

PLA2G4D ENSOARGO( phosphol 3p, miR-19a-3p, miR-339b, miR-450b-3p, miR-450a-1-3p, miR-199b-5p, miR-2285c, miR-361-3p, miR-3596, miR-582-5p, miR-133c, miR-203-3p, miR-199a-5p, miR-223-5p, miR-3120-3p, miR-499b-5p, miR-2355-5p, novel\_1, miR-450b-3p, miR-135a-1-3p, miR-107-5p, miR-26c, miR-1973, miR-199b-5p, miR-3059-5p, miR-2285x, miR-142-3p, miR-19b-3p, miR-2284x, miR-200b-3p, miR-542-3p, novel\_133, miR-1434-5p, miR-450c-3p, miR-2904, miR-2427, miR-200b, miR-505-5p, miR-7859, miR-2285g, miR-2459, miR-2285e, miR-450a-1-3p, miR-133b-5p, miR-429-3p, miR-339-5p, novel\_79, miR-200c-3p, miR-103a-2-5p, miR-199b-5p, miR-30b-3p, miR-200c, novel\_115, novel\_17, miR-339a, miR-216a-5p, miR-130a-5p, miR-432-3p, miR-199a-5p, miR-668-3p

PDE4DIP ENSOARGO( phosphod 5p, miR-19a-3p, miR-339b, miR-450b-3p, miR-450a-1-3p, miR-199b-5p, miR-2285c, miR-361-3p, miR-3596, miR-582-5p, miR-133c, miR-203-3p, miR-199a-5p, miR-223-5p, miR-3120-3p, miR-499b-5p, miR-2355-5p, novel\_1, miR-450b-3p, miR-135a-1-3p, miR-107-5p, miR-26c, miR-1973, miR-199b-5p, miR-3059-5p, miR-2285x, miR-142-3p, miR-19b-3p, miR-2284x, miR-200b-3p, miR-542-3p, novel\_133, miR-1434-5p, miR-450c-3p, miR-2904, miR-2427, miR-200b, miR-505-5p, miR-7859, miR-2285g, miR-2459, miR-2285e, miR-450a-1-3p, miR-133b-5p, miR-429-3p, miR-339-5p, novel\_79, miR-200c-3p, miR-103a-2-5p, miR-199b-5p, miR-30b-3p, miR-200c, novel\_115, novel\_17, miR-339a, miR-216a-5p, miR-130a-5p, miR-432-3p, miR-199a-5p, miR-668-3p

LPP ENSOARGO( LIM doma 5p, miR-19a-3p, miR-339b, miR-450b-3p, miR-450a-1-3p, miR-199b-5p, miR-2285c, miR-361-3p, miR-3596, miR-582-5p, miR-133c, miR-203-3p, miR-199a-5p, miR-223-5p, miR-3120-3p, miR-499b-5p, miR-2355-5p, novel\_1, miR-450b-3p, miR-135a-1-3p, miR-107-5p, miR-26c, miR-1973, miR-199b-5p, miR-3059-5p, miR-2285x, miR-142-3p, miR-19b-3p, miR-2284x, miR-200b-3p, miR-542-3p, novel\_133, miR-1434-5p, miR-450c-3p, miR-2904, miR-2427, miR-200b, miR-505-5p, miR-7859, miR-2285g, miR-2459, miR-2285e, miR-450a-1-3p, miR-133b-5p, miR-429-3p, miR-339-5p, novel\_79, miR-200c-3p, miR-103a-2-5p, miR-199b-5p, miR-30b-3p, miR-200c, novel\_115, novel\_17, miR-339a, miR-216a-5p, miR-130a-5p, miR-432-3p, miR-199a-5p, miR-668-3p

miR-29a, miR-2284o, miR-28c, miR-142b, miR-4324, miR-2284w, miR-29c-3p, miR-193b-3p, miR-378f, miR-146b-5p, miR-410-5p, miR-3970, miR-669, miR-299b-3p, miR-374c-3p, miR-3074-5p, miR-193a-3p, miR-483-3p, miR-32, miR-146a, miR-432-3p, let-7f-2-3p, let-7f-2-3p, miR-6240, miR-497-5p, miR-16b, miR-450c-3p, miR-432, miR-134-3p, miR-3431, miR-339-5p, miR-100-3p, miR-6740-5p, miR-181c-3p, miR-16-5p, miR-193a-5p, miR-20b-5p, miR-345-5p, miR-93-5p, miR-30e-5p, miR-25-3p, miR-300-3p, miR-2355-5p, novel\_96, miR-127-5p, miR-125a-3p, miR-192-3p, miR-450b-5p, miR-92b-3p, miR-30c, miR-23b-5p, miR-330-5p, novel\_121, miR-450a-1-3p, miR-322-5p, miR-18b-5p, novel\_79, miR-6517, miR-299a-3p, miR-2285ad, miR-3968, miR-2440, miR-423-5p, miR-361-3p, miR-6527, miR-363-3p, miR-2447, miR-376a-3p, miR-181a-3p, miR-381-3p, miR-1185-2-3p, miR-203-3p, miR-2483-3p, miR-378g, miR-7689-3p, miR-139-5p, miR-153-3p, miR-146b, miR-491-5p, miR-106b-5p, miR-16b, miR-29b-1-5p, miR-323b-3p, miR-2310, miR-8485, miR-378d, miR-744-3p, miR-124a, miR-323b, miR-541, miR-2459, miR-1185-3p, miR-421, miR-455-3p, miR-376b-3p, miR-153, miR-330-3p, novel\_78, miR-1343-3p, miR-548w, miR-130b-5p, miR-4492, miR-1468-5p, miR-665, miR-2285j, miR-181c-5p, miR-122-5p, miR-3184-5p, miR-224-5p, miR-346, miR-665-5p, miR-3958-5p, miR-3074-5p, miR-590-3p, miR-186-5p, miR-1827, miR-339b, miR-345-5p, miR-30d-5p, miR-433-3p, miR-450a-1-3p, miR-15b-5p, miR-151b, miR-582-5p, miR-552-3p, miR-296-3p, miR-548o-3p, miR-32-5p, miR-2331-3p, miR-30c-1-3p, miR-202-5p, miR-422a, miR-92a-1-5p, miR-210-5p, miR-30b, miR-34a-5p, miR-378a-3p, miR-217-5p, miR-378i, miR-30c-5p, miR-210-3p, miR-106a, miR-147-5p, miR-203b-5p, miR-92a-3p, miR-33a-3p, miR-34c, miR-16a, miR-20a-5p, miR-6529b, miR-15a, miR-2428, novel\_27, miR-326-3p, miR-119a, miR-323c, miR-21-3p, miR-6119-5p, miR-2285t, miR-544a, miR-541-5p, miR-4286, miR-2331-3p, miR-324-5p, miR-8095, miR-544b, miR-126a-5p, miR-383-5p, miR-544-3p, miR-378g, miR-134-3p, miR-218-5p, miR-107-5p, miR-490-5p, miR-212-3p, miR-2447, miR-194b-5p, miR-2285f, novel\_111, miR-211, miR-7705, miR-2285ab, miR-376b-5p, miR-378b, miR-410-5p, miR-2319a, miR-335-3p, miR-2319b, miR-139-5p, miR-211-5p, miR-126b-5p, miR-7977, miR-2404, miR-146b-3p, miR-181b-3p, miR-677, miR-296-3p, miR-194a, miR-103a-2-5p, miR-660, miR-376b, miR-758-3p, miR-8485, miR-296-3p, miR-1285, miR-484, miR-6529a, miR-194-5p, miR-758-3p, miR-219a-1-3p, miR-339-5p, miR-3431, miR-455-3p, miR-494-5p, miR-655-3p, miR-331-3p, miR-204-5p, miR-374b-3p, miR-487a-5p, miR-193a-5p, miR-3958-5p, miR-374a-3p, miR-338-3p, miR-411, miR-376c-5p, miR-655, miR-487b-5p, miR-339b, miR-10b-3p, miR-2312, miR-582-5p, miR-671-5p, miR-376c-5p, miR-3074-1-3p, miR-660-5p, miR-1271, miR-141-3p, miR-139-5p, miR-582-5p, miR-300-3p, miR-154b-5p, miR-877-5p, miR-204-3p, novel\_32, miR-223-5p, miR-200c, miR-196a-3p, miR-339a, miR-200c-3p, miR-200a-3p, miR-369-3p, miR-376a-5p, miR-200a, miR-193b-5p, novel\_133, miR-140-3p, miR-5703, miR-142-3p, miR-361-5p, miR-200b-3p, miR-429-3p, novel\_79, miR-200b, miR-505-5p

miR-452-5p, miR-181d-5p, novel\_60, miR-32-3p, miR-30b9-5p, miR-3956-3p, miR-502-3p, novel\_111, miR-2440, miR-499b-5p, miR-211-5p, miR-7977, miR-139-5p, miR-2319b, miR-20a-3p, miR-500-3p, miR-499a-3p, miR-140-5p, miR-136-5p, miR-504, miR-33a-5p, miR-1388-3p, miR-382-3p, miR-758-3p, miR-29b-1-5p, miR-182-5p, miR-199a-3p, miR-1306-5p, miR-1185-5p, miR-3955-3p, miR-181b-2-3p, miR-222-5p, miR-105-1, miR-1343-3p, miR-548w, miR-455-3p, miR-9788-3p, miR-496-5p, miR-501-3p, miR-1a-3p, miR-758-3p, miR-2284r, miR-3120-5p, miR-3958-5p, miR-3074-2-3p, miR-3074-5p, miR-181c-5p, miR-206-3p, miR-224-5p, miR-30a-3p, miR-324-3p, miR-19b-1-5p, miR-29b-2-5p, miR-30e-3p, miR-208b-5p, miR-874-5p, miR-129-5p, miR-130b-5p, miR-450b-3p, miR-17-3p, miR-155-5p, miR-487b-5p, miR-154a-3p, miR-182-5p, miR-140-5p, miR-2331-3p, miR-504-5p, miR-32-3p, novel\_32, miR-155-5p, miR-499b-3p, miR-582-5p, miR-139-5p, miR-216b-5p, miR-129b-3p, miR-433-3p, miR-450a-1-3p, miR-625-5p, miR-582-5p, miR-133b-3p, miR-2424, miR-2432, miR-29b-1-5p, miR-130a-5p, miR-181b-1-3p, miR-345-3p, novel\_17, miR-30b-3p, miR-2484, miR-202-5p, miR-3600, miR-30d-3p, miR-532-3p, miR-199a-3p, miR-210-3p, miR-200b, miR-217-5p, miR-5703, novel\_133, miR-2366, miR-133a-3p, miR-218-1-3p, miR-142-3p, miR-17-3p, novel\_27, miR-2428, miR-211, miR-33a-3p, miR-382-5p, miR-502-5p, miR-656-5p, miR-421-5p, miR-502b, miR-206, miR-655-5p, miR-7-1-3p, miR-3074-5p, miR-677, miR-181b-3p, miR-3970, miR-1306, miR-410-5p, miR-382, miR-130b-5p, miR-503-3p, miR-105-5p, novel\_51, miR-2411-3p, miR-224-5p, miR-452-5p, miR-483-3p, miR-378a-5p, miR-665, miR-31-5p, miR-197-3p, miR-450c-3p, miR-3071-5p, miR-19b-2-5p, miR-873a-5p, miR-542-3p, miR-181a-5p, miR-1843b-5p, miR-2284x, miR-1260b, miR-133a-3p, miR-1306-5p, miR-145-3p, miR-1260b, miR-6740-5p, miR-409-3p, miR-410-5p, miR-135a-1-3p, miR-31-3p, miR-204-5p, miR-

miR-296-5p, miR-216a-3p, miR-9788-3p, miR-455-3p, miR-147a, miR-409b, miR-491-5p, miR-182-5p, novel\_115, miR-1306-5p, miR-30c-1-3p, miR-124a, miR-9-3p, miR-504, miR-361-3p, miR-652-3p, miR-7857-3p, miR-2285u, miR-139-5p, miR-4792, miR-335, miR-3968, miR-2285y, miR-2285n, miR-9-3p, miR-423-5p, novel\_111, miR-194b-5p, miR-3956-3p, novel\_60, miR-16-1-3p, miR-133a-3p, miR-142-3p, miR-188-3p, miR-1193, miR-5703, miR-2904, miR-124-3p, novel\_133, miR-328-3p, miR-18a-3p, miR-3960, miR-2484, miR-30b-3p, miR-99a-3p, miR-466i-5p, miR-185-3p, miR-486-3p, miR-376c-3p, miR-503-5p, novel\_99, miR-885-3p, miR-345-5p, miR-500a-3p, miR-450a-1-3p, miR-877-5p, miR-139-5p, miR-27a-5p, miR-376e-3p, miR-182-5p, miR-296-3p, miR-1277-3p, miR-504-5p, miR-2331-3p, miR-30c-1-3p, miR-500, miR-4492, miR-450b-3p, miR-320e, miR-3184-5p, miR-6525, miR-145a-3p, miR-2889, miR-16-1-3p, miR-194-5p, miR-450c-3p, miR-223-3p, miR-873a-5p, novel\_116, miR-194-3p, miR-185-5p, miR-503-5p, miR-187-3p, miR-31-5p, miR-1343-5p, miR-194a, novel\_51, miR-197-5p, miR-377-3p, miR-503-5p, miR-345-5p, miR-503-3p, miR-432-3p, miR-628-5p, miR-6395, miR-1291, miR-18a-3p, miR-1306, miR-677, miR-320b, miR-147-5p, miR-576-3p, miR-6529b, miR-2284w, miR-24-3p, miR-371b-3p, miR-335-5p, miR-885-3p, miR-1343-5p, miR-7134-5p, miR-450a-1-3p, miR-6517, miR-2285ad, miR-543-5p, novel\_127, novel\_96, miR-127-5p, miR-450a-2-3p, miR-30c-2-3p, miR-8117, miR-1271-3p, novel\_39, miR-345-5p, miR-3154, miR-301, miR-424-3p, miR-488-3p, miR-376c-3p, miR-99a-3p, miR-370-3p, miR-2355-5p, miR-486b-3p, miR-331-3p, miR-6740-5p, miR-100-3p, miR-2332, miR-99b-3p, miR-1197-3p, miR-144-5p, miR-2404, miR-323a-5p, miR-25, novel\_69, miR-499b-5p, miR-7977, miR-6516-3p, novel\_94, miR-450b-3p, miR-326-3p, miR-362-5p, novel\_101, miR-452-5p, miR-2447, miR-885-5p, miR-7134-3p, miR-3968, miR-4726-5p, miR-2285y, miR-576-3p, miR-500-5p, miR-185-5p, miR-26b-3p, miR-1343-3p, miR-1388-5p, miR-2426, miR-2284r, miR-484, miR-7b-5p, miR-30c-1-3p, miR-33a-5p, miR-452-5p, miR-214-3p, miR-197-5p, miR-7-5p, miR-431-5p, miR-326, miR-204-3p, miR-376c-3p, miR-376e-3p, miR-6130, miR-323-5p, miR-2355-5p, miR-296-3p, miR-30c-1-3p, novel\_99, miR-362-5p, miR-3154, miR-21a-3p, miR-331-5p, miR-500b-5p, miR-6128, miR-214, miR-144-5p, miR-1306-5p, miR-4510, miR-331-5p, miR-6516-3p, miR-100-3p, miR-665, miR-338-5p, miR-135a-1-3p, miR-545-5p, novel\_121, miR-2411-5p, miR-431, miR-2285ad, miR-378d, miR-330-5p, miR-193b-5p, miR-200a, miR-2411, miR-490-3p, miR-376c-3p, miR-543-5p, miR-21-3p, miR-30c-2-3p, novel\_17, miR-2285aa, miR-499b-5p, miR-21-3p, miR-2285u, miR-22-3p, miR-6535, novel\_69, miR-2483-3p, miR-3591-3p, miR-140-5p, miR-493-5p, miR-544-5p, miR-2285x, miR-539-5p, miR-6525, miR-3604, miR-664a-5p, miR-208a-3p, miR-665, miR-145b, miR-222-5p, novel\_4, miR-9788-3p, miR-302a-5p, miR-539-5p, miR-323b, miR-22-3p, miR-145a-5p, miR-23b-5p, miR-30b-3p, miR-218-1-3p, miR-30b-3p, miR-582-3p, miR-744-3p, miR-493-5p, miR-193a, miR-192-3p, miR-2285b, miR-30f, miR-323b-3p, miR-185-3p, miR-208b-3p, miR-2285p, miR-487b-5p

miR-652b, miR-181c-5p, miR-3074-5p, miR-214, novel\_74, miR-500, miR-30e-3p, miR-665, miR-30a-3p, miR-499b-3p, miR-15b-5p, miR-504-5p, miR-1827, miR-30d-5p, miR-129b-3p, miR-500a-3p, miR-181b-1-3p, miR-421-5p, miR-2285i, miR-664b-3p, miR-2285w, miR-329a-5p, miR-3653-3p, miR-26a-5p, miR-208b-3p, miR-30b, miR-92a-1-5p, miR-345-3p, miR-23c, miR-23b-3p, miR-2284h-5p, miR-18a-3p, miR-212-5p, miR-30d-3p, miR-33b-3p, miR-148a-5p, miR-16-1-3p, miR-664-5p, miR-218-1-3p, miR-30c-5p, miR-2447, miR-2284j, miR-628-3p, miR-3968, miR-3964, novel\_82, miR-499a-3p, miR-3596, miR-4443, miR-211-5p, miR-126b-5p, miR-2285u, miR-504, miR-9-3p, miR-221, miR-140-5p, miR-381-3p, miR-2310, miR-124a, miR-23a-3p, miR-214-3p, miR-153-3p, miR-199b-5p, miR-199a-3p, miR-16b, miR-29b-1-5p, miR-323b-3p, miR-539-5p, miR-1298-3p, miR-153, miR-148b-5p, miR-455-3p, miR-1343-3p, miR-330-3p, miR-181b-2-3p, miR-101c, miR-1839-5p, miR-541, miR-323b, miR-1197-3p, miR-2284v, miR-16-5p, miR-134-5p, novel\_63, miR-2284k, miR-125b-5p, miR-300-3p, miR-874-3p, miR-3068-3p, miR-125a, miR-3956, miR-2318, miR-876-3p, miR-30e-5p, miR-23b, miR-2285b, miR-29a-5p, miR-3064-5p, novel\_127, miR-30f, miR-322-5p, miR-2284z, miR-134-5p, miR-429-3p, miR-1224-5p, miR-30c, miR-1290, miR-3591-5p, miR-1343-5p, miR-199b-5p, miR-335-5p, miR-29c-3p, miR-193b-3p, miR-29a, miR-208a-3p, miR-374c-3p, miR-181b-3p, miR-320c, miR-677, miR-3074-5p, miR-329-5p, miR-26b-5p, miR-3591-3p, miR-3065-5p, miR-150-5p, miR-2284l, miR-432-3p, miR-6240, miR-380-5p, miR-628-5p, miR-668-3p, miR-193a-3p, miR-582, miR-7-5p, novel\_51, miR-2411-3p, miR-3431, miR-3955-5p, miR-16-1-3p, miR-16b, miR-2284x, miR-497-5p, miR-7b-5p, miR-1843b-5p, miR-432, novel\_23, miR-22-3p, miR-338-3p, miR-4510, miR-3074-2-3p, miR-17-3p, miR-708-5p, miR-208b-5p, miR-424-5p, miR-222-3p, miR-20b-2-5p, miR-320a, miR-103b-3p, miR-

miR-668-3p, miR-432-3p, miR-2285r, miR-146a, miR-377-3p, miR-105-5p, miR-31-5p, miR-339-5p, miR-3431, miR-412-5p, miR-3535, novel\_116, miR-223-3p, miR-708-3p, miR-22-3p, miR-16-1-3p, miR-188-5p, miR-29c-3p, miR-199b-5p, miR-2284w, miR-4324, miR-29a, miR-206, novel\_68, miR-411b-3p, miR-374c-3p, miR-181b-3p, miR-677, miR-6535, miR-144-3p, miR-148a-3p, miR-216a-3p, miR-1306, let-7e-5p, miR-2319a, miR-146b-5p, miR-3064-5p, miR-2285b, let-7g, miR-29a-5p, novel\_39, let-7f-5p, miR-28-3p, miR-200a-3p, miR-152-3p, miR-6517, miR-429-3p, novel\_79, novel\_121, miR-134-5p, miR-1290, miR-330-5p, miR-155-5p, miR-28a-3p, miR-1197-3p, miR-125b-5p, novel\_9, miR-134-5p, miR-874-3p, miR-1271, miR-125a, miR-2285aa, miR-331-5p, miR-133c, miR-23b, miR-93-5p, miR-329b, miR-345-5p, miR-20b-5p, miR-23a-3p, miR-182-5p, miR-106b-5p, miR-199b-5p, miR-146b, miR-548w, novel\_78, miR-181b-2-3p, miR-376b-3p, miR-142-5p, miR-421, miR-455-3p, miR-1a-3p, miR-1839-5p, miR-1285-5p, miR-2440, novel\_82, miR-628-3p, miR-490-5p, miR-2319b, miR-378j, miR-376a-3p, miR-335-3p, miR-503-5p, miR-487a, miR-181b-1-3p, miR-142a-3p, miR-143-3p, miR-486-3p, miR-92a-1-5p, miR-500a-5p, miR-98-5p, let-7k, miR-2484, miR-106a, miR-23c, miR-23b-3p, miR-7859, miR-210-3p, miR-1247-5p, miR-1961, miR-142-3p, miR-33b-3p, miR-16-1-3p, miR-133a-3p, let-7b, miR-224-5p, miR-142a-5p, miR-2285j, let-7f, miR-664a-5p, miR-552-3p, miR-216b-3p, miR-154a-3p, miR-2284s, miR-377-3p, let-7i-5p, miR-345-5p, miR-339b, miR-1827, miR-625-5p, miR-2483-5p, miR-345-5p, miR-503-5p, miR-224-5p, miR-17-5p, miR-106a-5p, miR-125a-5p, miR-133b-5p, miR-187-3p, miR-665, miR-503-5p, miR-185-5p, let-7g-5p, miR-20b, miR-2355-3p, miR-1434-3p, miR-29b, miR-138, miR-21-5p, miR-7862, miR-17-3p, miR-2285x, miR-371b-3p, miR-326-3p, miR-6402, miR-20a-5p, miR-502-5p, let-7i, novel\_1, miR-7-1-3p, miR-29a-3p, miR-2285ab, miR-182-5p, miR-326, miR-296-3p, miR-210-5p, miR-1343-5p, miR-106b-3p, miR-466i-5p, miR-17-3p, miR-4286, miR-30a-3p, miR-668-3p, miR-2285b, miR-296-3p, miR-125b-2-3p, miR-330-5p, miR-1434-5p, miR-1343-5p, miR-2284r, miR-2284x, miR-30d-3p, miR-548w, novel\_4, miR-421, miR-2459, miR-149-5p, miR-455-3p, miR-6516-5p, miR-769-5p, miR-100-3p, miR-30a-3p, miR-2440, miR-30e-3p, miR-410-5p, miR-874-5p, miR-656-5p, miR-379-3p, miR-17-3p, miR-17-3p, miR-2285x, miR-326-3p, miR-769-5p, miR-409-5p, miR-301, miR-361-3p, miR-488-3p, miR-21a-3p, miR-7977, miR-182-5p, miR-874-3p, novel\_68, miR-154b-5p, miR-203-3p, miR-769, miR-2483-3p, miR-6516, miR-2284s

GGCX ENSOARGO( gamma-glu: miR-1306, miR-140-3p, miR-2285n, miR-34c-3p, miR-1306-5p

GANC ENSOARGO( glucosid: miR-1306, miR-140-3p, miR-2285n, miR-34c-3p, miR-1306-5p

AHSG ENSOARGO( alpha-2-: miR-1306, miR-140-3p, miR-2285n, miR-34c-3p, miR-1306-5p



miR-118b-3p, miR-9788-3p, miR-216a-3p, miR-27a-3p, miR-145b, miR-199b-3p, miR-409b, miR-105-1, novel\_78, miR-1343-3p, miR-151a-3p, miR-3120-5p, miR-21b, miR-450b-5p, miR-544a, miR-2426, miR-1388-5p, miR-30b-3p, miR-412-3p, miR-4791, miR-143-5p, miR-6529a, miR-2310, miR-30c-1-3p, miR-101b-3p, miR-124a, miR-214-3p, miR-3955-3p, miR-491-5p, miR-182-5p, miR-29b-1-5p, miR-431-5p, miR-199a-3p, miR-320b, miR-1185-2-3p, miR-27a-3p, miR-4443, miR-7857-3p, miR-7977, miR-1983, miR-493-5p, miR-129b-5p, miR-140-5p, miR-7705, miR-190b-5p, miR-2285f, miR-3059-5p, miR-374a-3p, miR-499a-5p, miR-2285n, miR-199a-3p, miR-2284h-5p, miR-340-5p, miR-222-5p, miR-7859, miR-487a-3p, miR-485-3p, miR-548e-3p, miR-378d, miR-361-5p, miR-34a-5p, miR-664-5p, miR-4429, miR-188-3p, miR-5703, miR-2904, miR-124-3p, miR-2366, miR-193b-5p, novel\_133, miR-2424, miR-181b-1-3p, miR-130a-5p, miR-29b-1-5p, miR-2285w, miR-299-3p, miR-21-3p, miR-221-5p, miR-34b-5p, miR-466i-5p, miR-760-3p, miR-345-3p, miR-196a-3p, miR-877-5p, miR-193b-3p, miR-6516, miR-544-3p, miR-532-5p, miR-182-5p, miR-21-3p, miR-216b-3p, miR-660-5p, miR-140-5p, miR-30c-1-3p, miR-221-5p, novel\_99, miR-339b, let-7g-3p, miR-2312, miR-27b-5p, miR-206-3p, miR-6525, miR-214, miR-3074-2-3p, miR-665-5p, miR-145a-3p, miR-708-5p, miR-874-5p, miR-664a, miR-487b-5p, novel\_74, miR-320e, miR-151-3p, miR-15b-3p, novel\_116, miR-3431, miR-412-5p, miR-3535, miR-26b-3p, miR-339-5p, miR-27b-3p, miR-29b, miR-2284ab, miR-30b-3p, miR-145a-5p, miR-450c-3p, miR-1434-3p, miR-708-3p, let-7a-2-3p, miR-539-3p, miR-2284l, miR-654-3p, let-7f-2-3p, let-7f-2-3p, miR-363-5p, miR-493-5p, miR-193a-3p, miR-452-5p, miR-660, miR-483-3p, miR-2411-3p, miR-105-5p, miR-181b-3p, miR-677, miR-299b-3p, miR-34b, miR-29a-3p, miR-2404, miR-655-5p, miR-320b, novel\_68, miR-376a-2-5p, miR-9851-3p, miR-112-3p, miR-2285ab, miR-119a, miR-299b-3p, miR-299-3p, miR-299a-3p, miR-30c-1-3p, miR-654-3p, miR-2330-5p, miR-376b, miR-1306-5p, miR-29b-1-5p, miR-149-5p, miR-148b-5p, miR-103, miR-103a-3p, miR-409b, miR-138, miR-30b-3p, miR-542-3p, miR-1434-3p, miR-7857, miR-450c-3p, miR-30b-3p, miR-24-3p, miR-502b, miR-2285y, novel\_69, miR-2284g, miR-107, miR-9851-3p, miR-1306, miR-29b-1-5p, miR-148b-5p, miR-130a-5p, miR-181a-2-3p, miR-107, miR-30b-3p, miR-30c-2-3p, miR-185-3p, miR-505-5p, miR-450a-1-3p, miR-2285ad, miR-1224-5p, miR-148a-5p, miR-2284u, miR-378d, miR-2300b-3p, miR-5703, miR-6134, miR-4510, miR-145a-3p, miR-3607-3p, miR-450b-3p, miR-138-5p, miR-664a, miR-6516-3p, miR-4492, miR-2332, miR-331-3p, miR-6740-5p, miR-664a-5p, miR-6130, miR-30c-1-3p, miR-3068-3p, miR-1271, miR-485-5p, miR-1827, miR-450a-1-3p, miR-129b-3p, miR-3154

CAPN3

ENSOARGO(calpain)

CPSF6

ENSOARGO(cleavage)

USP39

ENSOARGO(ubiquiti)

|       |                     |                                                                                                                                                                                                                                                                                                                                                                                                                                                                                                                                                                                                                                                                                                                                                                                                                                                                                                                                                                                                                                                                                                                                                                                                                                                                                                                                                                                                                                                                                                                                                                                                                                                                                                                                                                                                                                                                                                                                                      |
|-------|---------------------|------------------------------------------------------------------------------------------------------------------------------------------------------------------------------------------------------------------------------------------------------------------------------------------------------------------------------------------------------------------------------------------------------------------------------------------------------------------------------------------------------------------------------------------------------------------------------------------------------------------------------------------------------------------------------------------------------------------------------------------------------------------------------------------------------------------------------------------------------------------------------------------------------------------------------------------------------------------------------------------------------------------------------------------------------------------------------------------------------------------------------------------------------------------------------------------------------------------------------------------------------------------------------------------------------------------------------------------------------------------------------------------------------------------------------------------------------------------------------------------------------------------------------------------------------------------------------------------------------------------------------------------------------------------------------------------------------------------------------------------------------------------------------------------------------------------------------------------------------------------------------------------------------------------------------------------------------|
|       |                     | miR-148b-3p, miR-3600, miR-18a-3p, miR-496, miR-582-3p, miR-4429, miR-2904, miR-362-3p, miR-345-3p, miR-29b-2-5p, miR-152-3p, novel_127, miR-2484, miR-107, miR-127-5p, miR-28-3p, miR-17-3p, miR-320d, miR-345-3p, miR-219b-5p, miR-216b-5p, miR-769, miR-2285aa, miR-496-3p, miR-503-3p, miR-140-5p, miR-1248, miR-7144-5p, miR-625-5p, miR-329a, miR-876-3p, miR-320a, miR-6134, miR-145-3p, miR-769-5p, miR-2330-3p, miR-3958-5p, miR-6128, miR-28a-3p, miR-669a-3p, miR-208b-5p, miR-31-3p, miR-17-3p, miR-29b-2-5p, miR-144, miR-410-5p, miR-103, miR-216a-3p, miR-3431, miR-153, miR-26b-3p, miR-103a-3p, miR-362-3p, miR-30b-3p, miR-30b-3p, miR-7857, miR-181a-5p, miR-301b-5p, miR-2113, miR-223-3p, miR-1434-3p, miR-708-3p, miR-329-3p, miR-653, miR-503-3p, miR-2285r, miR-33a-5p, miR-101b-3p, miR-153-3p, miR-2411-3p, miR-362-3p, miR-320b, miR-6535, miR-144-3p, miR-320c, miR-2404, miR-3120-3p, miR-452-3p, miR-216b-3p, miR-20a-3p, miR-107, miR-410-5p, miR-381-3p, miR-18a-3p, miR-148a-3p, miR-140-5p, novel_111, miR-361-3p, miR-17-3p, miR-452-5p, miR-212-3p, miR-3059-5p, miR-301a-5p, miR-769-5p, miR-142b                                                                                                                                                                                                                                                                                                                                                                                                                                                                                                                                                                                                                                                                                                                                                                                                               |
| CHD1L | ENSOARGO(C chromodo |                                                                                                                                                                                                                                                                                                                                                                                                                                                                                                                                                                                                                                                                                                                                                                                                                                                                                                                                                                                                                                                                                                                                                                                                                                                                                                                                                                                                                                                                                                                                                                                                                                                                                                                                                                                                                                                                                                                                                      |
| TRA2B | ENSOARGO(C transfor | miR-2478, miR-2300b-3p, miR-338-5p, miR-3074-2-3p                                                                                                                                                                                                                                                                                                                                                                                                                                                                                                                                                                                                                                                                                                                                                                                                                                                                                                                                                                                                                                                                                                                                                                                                                                                                                                                                                                                                                                                                                                                                                                                                                                                                                                                                                                                                                                                                                                    |
| SENP2 | ENSOARGO(C SUMO1/se | miR-365b-5p, let-7 j, miR-365a-5p, miR-185-5p                                                                                                                                                                                                                                                                                                                                                                                                                                                                                                                                                                                                                                                                                                                                                                                                                                                                                                                                                                                                                                                                                                                                                                                                                                                                                                                                                                                                                                                                                                                                                                                                                                                                                                                                                                                                                                                                                                        |
| LIPH  | ENSOARGO(C lipase,  | miR-127-5p, miR-378a-5p, miR-2113<br>miR-1224-5p, miR-7641, miR-2285ad, miR-222, miR-429-3p, miR-2284z, miR-545-5p, novel_121, miR-9-5p, miR-24-2-5p, miR-322-5p, miR-6516-5p, miR-483-3p, miR-2427, miR-30a-5p, miR-345-3p, miR-30c, miR-496, let-7a-2-3p, miR-300, miR-3064-5p, miR-30a-3p, miR-29b-2-5p, miR-2284f, miR-181a-2-3p, novel_39, miR-3065-3p, miR-2284y, miR-192-3p, miR-2284a, miR-2285b, miR-3071-3p, miR-30f, miR-205-5p, miR-200c, miR-664-3p, miR-107, miR-200a-3p, miR-152-3p, miR-200c-3p, miR-181b-5p, miR-2355-5p, miR-141-3p, miR-503-3p, miR-2284n, miR-30e-5p, miR-381-3p, miR-503-3p, miR-3074-1-3p, miR-7144-5p, miR-23a-5p, let-7g-3p, miR-329a, miR-16-5p, miR-2284v, miR-181c-3p, miR-410-5p, novel_63, miR-2284k, miR-486b-3p, miR-130a-3p, miR-665, miR-103a-3p, miR-103, miR-2284d, miR-412-5p, miR-185-5p, miR-134-3p, novel_23, miR-145a-5p, miR-873a-5p, miR-1434-3p, miR-181a-5p, miR-497-5p, miR-27b-3p, miR-7862, miR-380-3p, miR-2284ab, miR-16b, miR-219a-1-3p, miR-668-3p, miR-382, miR-539-3p, let-7a-2-3p, miR-654-3p, miR-2284l, miR-2411-3p, miR-224-5p, miR-466f-3p, miR-483-3p, miR-26b-5p, miR-3120-3p, miR-378b, miR-2404, miR-411b-3p, miR-150-5p, miR-3065-5p, miR-148a-3p, miR-505-3p, miR-195a-5p, miR-19a-3p, miR-412-3p, miR-2284e, miR-107, miR-2285x, miR-335-5p, miR-301b-3p, miR-2428, miR-2284w, miR-485-3p, miR-2284o, miR-16a, novel_87, miR-382-5p, miR-15a, miR-576-3p, miR-203b-5p, miR-6123, miR-3600, miR-485-3p, miR-505-3p, miR-548e-3p, miR-2284h-5p, miR-487a-3p, miR-7859, miR-15a-5p, miR-148b-3p, miR-124-3p, miR-1434-5p, miR-30c-5p, miR-362-3p, miR-2284u, miR-33b-3p, miR-19b-3p, miR-2285w, miR-486-3p, miR-380-3p, miR-345-3p, miR-185-3p, miR-30b, miR-26a-5p, miR-618, miR-1277-5p, miR-30d, miR-3653-3p, miR-21-3p, miR-2284m, miR-3065-3p, miR-140-5p, miR-496-3p, miR-32-3p, miR-548o-3p, miR-204-3p, miR-15b-5p, miR-301a-3p, miR-2284c, miR-6516, miR-30d- |
| AGFG1 | ENSOARGO(C ArfGAP w |                                                                                                                                                                                                                                                                                                                                                                                                                                                                                                                                                                                                                                                                                                                                                                                                                                                                                                                                                                                                                                                                                                                                                                                                                                                                                                                                                                                                                                                                                                                                                                                                                                                                                                                                                                                                                                                                                                                                                      |

|         |                      |                                                                                                                                                                                                                                                                                                                                                                                                                                                                                                                                                                                                                                                                                                                                                                                                                                                                                                                                                                                                                                                                                                                                                                                                                                                                                                                                                                                                                                                                                                                                                                                                                                                                                                                                                                                                                                                                                                                                                                                                                                                                                                                                                                |
|---------|----------------------|----------------------------------------------------------------------------------------------------------------------------------------------------------------------------------------------------------------------------------------------------------------------------------------------------------------------------------------------------------------------------------------------------------------------------------------------------------------------------------------------------------------------------------------------------------------------------------------------------------------------------------------------------------------------------------------------------------------------------------------------------------------------------------------------------------------------------------------------------------------------------------------------------------------------------------------------------------------------------------------------------------------------------------------------------------------------------------------------------------------------------------------------------------------------------------------------------------------------------------------------------------------------------------------------------------------------------------------------------------------------------------------------------------------------------------------------------------------------------------------------------------------------------------------------------------------------------------------------------------------------------------------------------------------------------------------------------------------------------------------------------------------------------------------------------------------------------------------------------------------------------------------------------------------------------------------------------------------------------------------------------------------------------------------------------------------------------------------------------------------------------------------------------------------|
| VPS8    | ENSOARGO(vacuolar)   | miR-148b-5p, miR-377-5p, miR-30c-1-3p, miR-105-1, miR-105-2, miR-744-5p, miR-330-5p, miR-653, miR-326-3p, miR-30c-1-3p, miR-377-5p, miR-656-5p, miR-4726-5p, miR-105-5p, miR-30c-2-3p, miR-326, miR-210-5p, novel_127, miR-28-3p, miR-127-5p, let-7f-5p, miR-125a-3p, miR-29a-5p, miR-200a, let-7g, miR-2285b, miR-3064-5p, miR-330-5p, miR-196a-5p, miR-1290, novel_121, miR-505-5p, miR-9-5p, novel_79, miR-2285ad, miR-429-3p, miR-6517, miR-592, miR-100-3p, miR-2433, miR-494-5p, miR-28a-3p, miR-767, miR-345-5p, miR-301, miR-223-5p, miR-874-3p, miR-3068-3p, miR-193a-3p, miR-483-3p, miR-196b-5p, novel_51, miR-2285r, miR-668-3p, let-7f-2-3p, let-7f-2-3p, miR-27b-3p, miR-16-1-3p, miR-22-3p, miR-432, miR-542-3p, miR-194-3p, miR-134-3p, miR-3431, miR-339-5p, miR-6119-3p, miR-29a, miR-485-3p, novel_87, miR-2284w, miR-193b-3p, miR-29c-3p, let-7e-5p, miR-150-5p, miR-3591-3p, miR-216a-3p, miR-677, miR-6535, miR-181b-3p, novel_68, miR-3074-5p, let-7k, miR-98-5p, miR-324-3p, miR-92a-1-5p, novel_17, miR-486-3p, miR-142a-3p, miR-181b-1-3p, miR-345-3p, miR-487a, miR-503-5p, miR-16-1-3p, miR-361-5p, miR-142-3p, miR-217-5p, miR-1434-5p, miR-1961, miR-2284h-5p, miR-18a-3p, miR-4492, miR-874-5p, miR-130b-5p, let-7f, miR-2285j, miR-3184-5p, miR-181c-5p, miR-346, miR-214, let-7b, miR-3074-5p, miR-625-5p, miR-1827, miR-345-5p, miR-339b, miR-129b-3p, miR-487b-5p, miR-433-3p, let-7i-5p, miR-2284s, miR-154a-3p, miR-216b-3p, miR-552-3p, miR-296-3p, miR-2331-3p, miR-214-3p, miR-1185-5p, miR-182-5p, miR-199a-3p, miR-1388-3p, miR-124a, miR-1839-5p, miR-758-3p, miR-2284r, miR-301b-5p, miR-1185-3p, miR-145b, miR-181b-2-3p, miR-199b-3p, miR-548w, novel_78, miR-154-3p, miR-301a-5p, miR-218-5p, miR-2440, miR-423-5p, miR-1285-5p, miR-361-3p, miR-9-5p, miR-96-5p, miR-136-5p, miR-203-3p, miR-1185-2-3p, miR-378g, miR-2483-3p, miR-2285u, miR-211-5p, miR-4792, miR-17-3p, miR-200c-3p, miR-181b-5p, miR-339a, miR-217, let-7c-5p, miR-200c, miR-3065-3p, miR-1957a, miR-2478, miR-29b-2-5p, miR-3529-3p, miR-200b-3p, miR-128-3p, let-7d, miR-29d-3p, miR-483-3p, miR-1271-3p, miR-541-5p, miR-2318, miR-8095 |
| CHRD    | ENSOARGO(chordin)    | miR-329b, miR-27b-3p, miR-877-3p, miR-330-5p, miR-299b-3p, miR-27a-3p, miR-144-3p, miR-329-5p, miR-20a-3p, miR-3064-5p, miR-299a-3p, miR-27a-3p, miR-141-3p, miR-3085-3p, miR-299-3p, miR-200a-3p, miR-326, miR-144, miR-432-3p, miR-432-3p, miR-361-3p, miR-490-3p, miR-338-3p, miR-326-3p, miR-212-3p, miR-329a-5p, miR-3064-5p                                                                                                                                                                                                                                                                                                                                                                                                                                                                                                                                                                                                                                                                                                                                                                                                                                                                                                                                                                                                                                                                                                                                                                                                                                                                                                                                                                                                                                                                                                                                                                                                                                                                                                                                                                                                                              |
| MGST1   | ENSOARGO(microsomal) |                                                                                                                                                                                                                                                                                                                                                                                                                                                                                                                                                                                                                                                                                                                                                                                                                                                                                                                                                                                                                                                                                                                                                                                                                                                                                                                                                                                                                                                                                                                                                                                                                                                                                                                                                                                                                                                                                                                                                                                                                                                                                                                                                                |
| ST3GAL5 | ENSOARGO(ST3 beta)   |                                                                                                                                                                                                                                                                                                                                                                                                                                                                                                                                                                                                                                                                                                                                                                                                                                                                                                                                                                                                                                                                                                                                                                                                                                                                                                                                                                                                                                                                                                                                                                                                                                                                                                                                                                                                                                                                                                                                                                                                                                                                                                                                                                |

miR-6516-5p, novel\_121, miR-214-5p, miR-450a-1-3p, miR-2285ad, miR-376a-5p, miR-128-3p, miR-345-3p, miR-28b, miR-450b-5p, miR-148b-5p, miR-450c-5p, miR-490-3p, miR-2284a, miR-2284y, miR-3064-5p, miR-17-3p, miR-450a-2-3p, miR-152-3p, miR-1260a, miR-374c-3p, miR-487a-3p, miR-876-3p, miR-485-5p, miR-1814c, miR-7144-5p, miR-20b-5p, miR-301, miR-331-5p, miR-17-5p, miR-93-5p, miR-1260b, miR-93, miR-365a-5p, miR-2284v, miR-133a-3p, miR-144-5p, miR-331-5p, miR-28-5p, miR-204-5p, miR-592, miR-2284k, miR-3431, miR-2284d, miR-2285g, miR-20b, miR-31-5p, miR-1260b, miR-16-1-3p, miR-2284ab, miR-2284x, miR-26a-2-3p, miR-7b-5p, miR-223-3p, miR-542-3p, miR-653, miR-145a-5p, miR-450c-3p, miR-22-3p, miR-432-3p, miR-2285r, miR-654-3p, miR-539-3p, miR-6240, miR-493-5p, let-7f-2-3p, let-7f-2-3p, miR-382, miR-363-5p, miR-660, miR-377-3p, miR-7-5p, miR-17-5p, novel\_51, miR-106a-5p, miR-2411-3p, miR-330-3p, miR-365b-5p, miR-374c-3p, miR-505-3p, miR-376a-2-5p, miR-148a-3p, miR-2285ab, miR-3065-5p, miR-216a-3p, miR-150-5p, miR-24-3p, miR-211, miR-2284w, miR-342-3p, miR-17-3p, miR-1839-3p, miR-147-5p, miR-199c, miR-625-3p, miR-28c, miR-133a-5p, miR-142b, miR-20a-5p, miR-148b-3p, miR-487a-3p, miR-616-3p, miR-106a, miR-485-3p, miR-505-3p, miR-184-3p, miR-16-1-3p, miR-376a-5p, miR-2300b-3p, miR-5703, miR-2904, miR-2424, miR-487a, miR-216c-5p, miR-345-3p, miR-20a, miR-106a, miR-2284m, miR-618, miR-92a-1-5p, miR-345-3p, miR-500a-5p, miR-499b-3p, miR-6516, miR-377-3p, miR-22-3p, miR-204-3p, miR-660-5p, miR-140-5p, miR-532-5p, miR-296-3p, miR-216b-3p, miR-154a-3p, miR-154b-3p, miR-133b-3p, miR-186-5p, miR-2285c, miR-450a-1-3p, miR-346, miR-142a-5p, miR-6525, miR-6134, miR-338-3p, miR-17-3p, miR-487b-5p, miR-450b-3p, novel\_74, miR-708-5p, miR-320e, miR-2285e, miR-148b-5p, miR-199b-3p, miR-330-3p, novel\_78, miR-769-5p, miR-10b-3p, novel\_42, miR-4510, miR-193a-5p, miR-214, miR-138-5p, miR-31-3p, miR-874-5p, miR-4492, miR-486b-3p, miR-2433, miR-6516, miR-34c-5p, miR-769, miR-139-5p, miR-6130, miR-154b-5p, miR-2331-3p, miR-221-5p, miR-1277-3p, miR-615-5p, miR-2474, miR-345-5p, miR-345-5p, miR-329a, miR-485-5p, miR-1827, miR-3154, miR-486-3p, miR-503-5p, miR-6536, miR-34b-5p, miR-107, miR-221-5p, miR-2484, miR-376b-3p, miR-217, miR-185-3p, miR-6516-5p, miR-1224-5p, miR-34a-5p, novel\_133, miR-2366, miR-362-3p, miR-124-3p, miR-217-5p, miR-361-3p, miR-449a, miR-128-1-5p, miR-142b, miR-2440, miR-769-5p, miR-34c, miR-378g, miR-411b-3p, miR-34b, miR-376d, miR-139-5p, miR-107, miR-376a-3p, miR-361-3p, miR-376b-3p, miR-4532, miR-3187-3p, miR-345-5p, miR-124a, miR-2285l, miR-153-3p, miR-214-3p, miR-503-5p, miR-5126, miR-362-3p, miR-2285v, miR-153, miR-376b-3p, miR-503-5p, miR-134-3p, miR-455-3p, miR-103, miR-1343-3p, miR-103a-3p, miR-138, miR-362-3p, miR-744-5p, miR-2889, miR-2284x, miR-329-3p, miR-197-3p, novel\_23

EPB42 ENSOARGO( erythrocyte)

EIF4G1 ENSOARGO( eukaryote)

miR-128-3p, miR-501-3p, miR-501-3p, miR-345-3p, miR-455-3p, miR-1b-3p, miR-3600, miR-214-3p, miR-21-3p, miR-199b-5p, miR-2411-3p, miR-345-3p, miR-377-3p, miR-210-5p, miR-342, miR-199a-5p, miR-345-3p, miR-195a-3p, miR-130b-5p, miR-1388-3p, miR-767, miR-216a-3p, miR-199b-5p, miR-500-3p, miR-652-3p, miR-204-3p, miR-199a-5p, miR-2483-3p, miR-377-3p, miR-7977, miR-552-3p, miR-216b-3p, miR-3068-3p, miR-130b-5p, miR-767-5p, miR-371a-5p, novel\_82, miR-199b-5p, miR-502-3p, miR-214, miR-342-3p, miR-2447, miR-200a, miR-1957a, let-7g, miR-199a-5p, miR-2478, miR-181a-2-3p, miR-3064-5p, novel\_96, miR-543-5p, miR-107, miR-200c-3p, let-7f-5p, miR-2898, let-7c-5p, miR-339a, miR-6119-5p, miR-200c, miR-125a-3p, miR-219-3p, miR-2285af, miR-205-5p, miR-214-5p, miR-129-1-3p, miR-2284z, miR-450a-1-3p, miR-545-5p, miR-1271-5p, miR-322-5p, miR-9-5p, miR-505-5p, novel\_79, miR-429-3p, miR-299a-3p, let-7a-2-3p, miR-10a-5p, miR-200b-3p, let-7d, miR-3578, miR-345-3p, miR-365a-5p, miR-16-5p, miR-2284v, miR-28-5p, miR-204-5p, miR-410-3p, miR-767-5p, miR-135a-5p, miR-331-3p, miR-494-5p, miR-2284k, miR-34c-3p, miR-154b-5p, miR-2284n, miR-199a-5p, miR-769, miR-2285aa, miR-1248, miR-671-5p, miR-345-5p, let-7g-3p, miR-767, miR-488-3p, let-7a-2-3p, miR-345-5p, miR-2284l, let-7f-2-3p, let-7f-2-3p, miR-363-5p, miR-193a-3p, novel\_51, miR-194a, miR-2411-3p, miR-3141, miR-365b-5p, miR-224-5p, miR-103, miR-149-5p, novel\_116, miR-134-3p, miR-185-5p, miR-3431, let-7g-5p, miR-2284d, miR-432-5p, miR-26b-3p, miR-339-5p, miR-665, miR-103a-3p, miR-187-3p, miR-31-5p, miR-497-5p, miR-2284ab, miR-16b, miR-194-5p, novel\_23, miR-3071-5p, miR-2113, miR-1434-3p, miR-432, miR-199b-5p, miR-2428, miR-211, miR-193b-3p, miR-199c, miR-147-5p, miR-206, let-7i, miR-16a, miR-133a-5p, miR-6402, miR-142b, miR-15a, miR-6535, novel\_69, miR-299b-3p, miR-10a-5p, miR-7-1-3p, miR-329-5p, miR-378b, novel\_68, miR-505-3p, miR-195a-5p, let-7e-5p, miR-135b-5p, miR-107, miR-3065-5p, miR-150-5p, miR-2387, miR-3141, miR-143-3p, miR-2424, miR-125b-2-3p, miR-29b-1-5p, miR-216c-5p, let-7k, miR-299-3p, miR-3653-3p, miR-466i-5p, miR-98-5p, miR-2284m, miR-345-3p, miR-210-5p, novel\_17, miR-196a-3p, miR-199a-3p, miR-200b, miR-15a-5p, miR-7859, miR-212-5p, miR-505-3p, miR-548e-3p, miR-664-5p, miR-5703, miR-124-3p, miR-2300b-3p, miR-1061, let-7b-

PTCD3 ENSOARGO(pentatri)

ITGA10 ENSOARGO(integrin)

miR-199b-5p, miR-2284o, miR-425-5p, miR-1247-3p, miR-576-3p, miR-216b-3p, miR-669, miR-144-3p, novel\_69, miR-150-5p, miR-216a-3p, miR-148a-3p, miR-378f, miR-6240, miR-432-3p, miR-365b-5p, miR-2411-3p, miR-296-3p, miR-31-5p, miR-194-3p, miR-197-3p, miR-22-3p, miR-708-3p, miR-542-3p, miR-4508, miR-497-5p, miR-16b, miR-16-1-3p, miR-16-5p, novel\_42, novel\_63, miR-494-5p, miR-200a-5p, miR-767, miR-329a, miR-329b, miR-2318, miR-3064-5p, miR-2284f, miR-2284y, miR-205-5p, miR-200a-3p, novel\_96, miR-152-3p, miR-127-5p, miR-18b-5p, miR-2285ad, miR-6517, miR-429-3p, miR-322-5p, miR-1343-5p, miR-155-5p, miR-2284j, miR-2447, miR-3956-3p, miR-2440, miR-3964, miR-628-3p, miR-139-5p, miR-2284g, miR-2319b, miR-500-3p, miR-4443, miR-378j, miR-221, miR-9-3p, miR-2284b, miR-8485, miR-1b-5p, miR-378d, novel\_19, miR-16b, miR-199b-5p, miR-103a-2-5p, miR-214-3p, miR-491-5p, miR-330-3p, miR-1343-3p, miR-501-3p, miR-758-3p, miR-2284r, miR-329-3p, miR-541, miR-1839-5p, miR-362-3p, miR-214, miR-6525, miR-346, miR-224-5p, miR-665, miR-3604, miR-500, miR-4492, miR-552-3p, miR-30c-1-3p, miR-1277-3p, miR-548o-3p, miR-15b-5p, miR-500a-3p, miR-129b-3p, miR-487b-5p, miR-1895, miR-2285w, miR-503-5p, miR-143-3p, miR-2285i, miR-500a-5p, miR-324-3p, miR-345-3p, miR-422a, miR-210-5p, miR-212-5p, miR-2284h-5p, miR-328-3p, miR-378a-3p, miR-378i, miR-16-1-3p, miR-664-5p, miR-2284u, miR-361-5p, miR-493-3p, miR-3957-3p, novel\_101, miR-17-3p, novel\_27, miR-2428, miR-24-3p, miR-16a, miR-382-5p, miR-15a, miR-6529b, miR-22-5p, miR-128-1-5p, miR-2404, miR-2285ab, miR-18b, miR-6395, miR-195a-5p, miR-450b-3p, miR-1291, miR-2285k, miR-19a-3p, miR-382, miR-2483-5p, miR-363-5p, miR-296-3p, miR-330-3p, miR-224-5p, miR-503-5p, miR-1343-5p, miR-122-3p, miR-2284d, miR-503-5p, miR-185-5p, miR-3071-5p, miR-744-5p, miR-6128, miR-103b, miR-1306-5p, miR-365a, miR-450b-3p, miR-17-3p, miR-424-5p, miR-4492, miR-331-3p, miR-224-5p, miR-16-5p, novel\_99, miR-450a-1-3p, miR-374c-3p, miR-300-3p, miR-199a-5p, miR-15b-5p, miR-552-3p, miR-17-3p, miR-107, miR-125a-3p, miR-324-3p, miR-125b-2-3p, miR-199a-5p, miR-490-3p, miR-2904, miR-1343-5p, miR-5703, miR-322-5p, miR-15a-5p, miR-450a-1-3p, miR-3968, miR-502b, miR-15a, miR-16a, miR-301a-5p, miR-425-5p, miR-199b-5p, miR-541-3p, miR-3957-3p, miR-17-3p, miR-3963, miR-107, miR-335-3p, miR-195a-5p, miR-199b-5p, miR-25, miR-2404, miR-374c-3p, miR-3082-5p, miR-320b, miR-199b-5p, miR-1343-5p, miR-224-5p, miR-16b, let-7j, miR-424-5p, miR-744-3p, miR-16b, miR-101a-5p, miR-497-5p, miR-873a-5p, miR-301b-5p, miR-1434-3p, miR-541, miR-450c-3p, miR-374b-3p, miR-455-3p, miR-103, miR-103a-3p

miR-134-3p, miR-2284d, miR-194-3p, miR-2113, miR-19b-2-5p, novel\_23, miR-219a-1-3p, miR-29b, miR-188-5p, miR-6240, miR-432-3p, let-7j, miR-377-3p, miR-224-5p, miR-2411-3p, miR-330-3p, miR-365b-5p, miR-466f-3p, miR-125a-5p, miR-3074-5p, miR-655-5p, miR-29a-3p, miR-323a-5p, miR-6535, miR-2285ab, miR-216a-3p, miR-3970, miR-6516-3p, miR-376a-2-5p, miR-9851-3p, miR-1a-1-5p, miR-342-3p, miR-219b-3p, miR-2285x, miR-29c-3p, miR-1839-3p, miR-576-3p, miR-142b, miR-33a-3p, novel\_1, miR-29a, miR-199c, miR-421-5p, miR-376a-5p, miR-431, miR-1271-5p, miR-9-5p, novel\_121, miR-545-5p, miR-582-3p, miR-2284z, miR-3578, miR-345-3p, miR-2427, miR-29d-3p, miR-582-3p, miR-496, miR-128-3p, miR-3529-3p, miR-181a-2-3p, miR-30a-3p, miR-29b-2-5p, miR-2478, miR-2285b, miR-2284a, miR-2285af, miR-30f, miR-1a-2-5p, miR-3068-3p, miR-487a-3p, miR-215-5p, miR-125a, miR-2285aa, miR-3959-5p, miR-223-5p, miR-329a, miR-2318, miR-767, miR-1814c, miR-671-5p, miR-7144-5p, miR-190a-3p, miR-6128, miR-193a-5p, miR-365a-5p, miR-2332, miR-5100, miR-29b-3p, miR-1-5p, miR-409-3p, miR-125b-5p, miR-100-3p, miR-767-5p, miR-374b-3p, miR-204-5p, miR-199b-3p, miR-2300a-5p, miR-330-3p, miR-1185-3p, miR-455-3p, miR-216a-3p, miR-143-5p, miR-329-3p, miR-2426, miR-362-3p, miR-2284aa, miR-21b, miR-1839-3p, miR-382-3p, miR-494-3p, miR-124a, miR-376b, miR-744-3p, miR-652-5p, miR-2310, miR-1b-5p, miR-8485, miR-193a, miR-431-5p, miR-342, miR-2957, miR-505, miR-29b-1-5p, miR-362-3p, miR-2483-3p, miR-378g, miR-3596, miR-1185-2-3p, miR-140-5p, miR-129b-5p, miR-96-5p, miR-3963, miR-212-3p, miR-3059-5p, miR-2447, miR-9-5p, miR-452-5p, miR-2285f, miR-154a, miR-1285-5p, miR-2284q, miR-548e-3p, miR-30d-3p, miR-485-3p, miR-7859, miR-487a-3p, miR-383-5p, miR-2284h-5p, miR-362-3p, miR-376a-5p, miR-215-5p, novel\_133, miR-1434-5p, miR-124-3p, miR-403-3p, miR-148a-5p, miR-15a-5p, miR-322-5p, miR-16b, miR-497-5p, miR-1434-5p, miR-2285r, miR-1271-3p, miR-424-5p, miR-493-5p, miR-382-3p, miR-1388-3p, miR-30a-3p, miR-29b-2-5p, miR-2898, miR-214-3p, miR-16b, miR-122-3p, miR-2404, miR-15b-5p, miR-6535, miR-140-5p, miR-541-5p, miR-195a-5p, miR-625-5p, miR-493-5p, miR-361-3p, miR-150-5p, miR-361-3p, miR-8095, miR-3074-2-3p, miR-214, miR-16-5p, miR-424-5p, miR-30e-3p, miR-15a, miR-29b-2-5p, miR-30a-3p, miR-16a

KLHL24 ENSOARGO(kelch-like domain) protein 24

REEP1 ENSOARGO(receptor type 1)

miR-9-5p, miR-486-5p, miR-155-5p, miR-99a-5p, miR-501-3p, miR-2427, miR-218-2-3p, miR-200a, miR-1957a, miR-3065-3p, miR-2385-3p, miR-495-5p, miR-30a-3p, miR-1a-2-5p, miR-200a-3p, miR-99a, miR-2285af, miR-2284n, miR-133c, miR-3068-3p, miR-141-3p, miR-329b, miR-2318, miR-488-3p, miR-100-5p, miR-320a, miR-2284v, miR-6128, miR-410-3p, miR-370-5p, miR-2332, miR-2284k, miR-1-5p, miR-3535, miR-2284d, miR-194-3p, miR-31-5p, miR-3955-5p, miR-26b-3p, miR-665, miR-16-1-3p, miR-2284x, miR-1434-3p, miR-653, novel\_23, miR-2284l, miR-432-3p, let-7j, miR-101-5p, miR-452-5p, miR-146a, miR-99a-5p, miR-105-5p, miR-320c, miR-146b-5p, miR-2319a, miR-1306, miR-150-5p, miR-2284w, miR-1a-1-5p, miR-1193, novel\_1, miR-147-5p, miR-421-5p, miR-576-3p, miR-382-5p, miR-7859, miR-199a-3p, miR-548e-3p, miR-4429, miR-16-1-3p, miR-218-1-3p, miR-2300b-3p, miR-1193, miR-1197-5p, miR-29b-1-5p, miR-421-5p, miR-146a-5p, miR-183-5p, miR-320d, miR-2284m, miR-21-3p, miR-2484, miR-324-3p, miR-216b-5p, miR-155-5p, miR-370-5p, miR-3065-3p, miR-186-5p, miR-299, miR-21a-3p, miR-27b-5p, miR-500a-3p, miR-214, miR-425-5p, miR-155-5p, miR-6516-3p, novel\_74, miR-500, miR-30e-3p, miR-320e, miR-338-5p, miR-30a-3p, miR-147a, miR-539-5p, miR-105-1, miR-5010-3p, miR-101a-5p, miR-4791, miR-143-5p, miR-484, miR-501-3p, miR-1b-5p, miR-744-3p, miR-214-3p, miR-146b, miR-1306-5p, miR-320b, miR-199a-3p, miR-505, miR-29b-1-5p, miR-3082-5p, miR-500-3p, miR-2319b, miR-99b-5p, miR-129b-5p, miR-381-3p, miR-877-3p, miR-361-3p, miR-502-3p, miR-3059-5p, miR-9-5p, miR-2284j, miR-452-5p, miR-499a-5p, miR-3958-3p, miR-2284q, miR-2440



miR-1b-5p, miR-3187-3p, miR-424-5p, miR-106a-5p, miR-103a-2-5p, miR-130b-3p, miR-25-5p, miR-491-5p, miR-3085-3p, miR-106b-5p, miR-16b, miR-29b-1-5p, miR-1306-5p, miR-216a-3p, miR-27a-3p, novel\_4, miR-2426, miR-501-3p, miR-301b-5p, miR-10b, miR-502-3p, novel\_111, miR-107-5p, miR-301a-5p, miR-2285y, miR-2440, miR-2285n, miR-218-5p, miR-500-3p, miR-27a-3p, miR-2483-3p, miR-2285u, miR-2319b, miR-3064-5p, miR-9-3p, miR-143-3p, miR-29b-1-5p, miR-20a, miR-1277-5p, miR-30b-3p, miR-106a, miR-185-3p, miR-196a-3p, miR-532-3p, miR-616-3p, miR-15a-5p, miR-148b-3p, miR-487a-3p, miR-505-3p, miR-106a, miR-188-3p, miR-5703, novel\_133, miR-224-5p, miR-10b-5p, miR-6525, miR-129-2-3p, miR-3184-3p, miR-454-3p, miR-424-5p, miR-664a, miR-17-3p, miR-29b-2-5p, miR-665, miR-15b-5p, novel\_25, miR-10a, miR-301a-3p, miR-132-5p, miR-21-3p, miR-548o-3p, miR-186-5p, novel\_99, miR-543-3p, miR-339b, let-7g-3p, miR-539-3p, miR-363-5p, miR-17-5p, miR-106a-5p, miR-197-5p, miR-224-5p, miR-20b, miR-194-3p, miR-411-5p, miR-339-5p, miR-130a-3p, miR-27b-3p, miR-497-5p, miR-16b, miR-1285, miR-873a-5p, miR-301b-3p, miR-17-3p, novel\_1, miR-33a-3p, miR-16a, miR-20a-5p, miR-15a, miR-144-3p, miR-10a-5p, novel\_68, miR-195a-5p, miR-505-3p, miR-135b-5p, miR-450b-3p, miR-216a-3p, miR-3591-3p, miR-1306, miR-148a-3p, miR-4286, miR-29b-2-5p, miR-3064-5p, miR-200a-3p, novel\_96, miR-152-3p, miR-17-3p, miR-339a, miR-486-5p, miR-129-1-3p, miR-134-5p, miR-322-5p, miR-1224-5p, novel\_79, miR-2285ad, miR-10a-5p, miR-128-3p, miR-23b-5p, miR-501-3p, miR-134, miR-93, miR-16-5p, miR-1306-5p, miR-134-5p, miR-135a-5p, miR-144, miR-331-5p, miR-1271, miR-141-3p, miR-370-3p, miR-485-5p, miR-20b-5p, miR-23a-5p, miR-17-5p, miR-93-5p, miR-301 novel\_83, miR-455-3p, miR-23c, miR-3431, miR-23b-3p, miR-218-1-3p, miR-380-3p, miR-23b-5p, miR-1193, miR-181a-5p, miR-491-3p, let-7a-2-3p, miR-148b-5p, miR-30c-1-3p, miR-450b-5p, miR-23a-3p, miR-493-5p, miR-6240, miR-181b-5p, miR-30c-2-3p, miR-219-3p, novel\_25, miR-300-3p, miR-21-3p, miR-10b, miR-30c-1-3p, miR-190a-3p, miR-493-5p, miR-335-3p, let-7g-3p, miR-668-5p, miR-23b, miR-3591-3p, miR-129b-3p, miR-181c-5p, miR-219a-2-3p, miR-323c, miR-181d-5p, miR-499a-5p, miR-219b-3p, miR-142b, miR-218-5p

TXNIP ENSOARGO(thioredoxin) 548o-3p, miR-186-5p, novel\_99, miR-543-3p, miR-339b, let-7g-3p, miR-539-3p, miR-363-5p, miR-17-5p, miR-106a-5p, miR-197-5p, miR-224-5p, miR-20b, miR-194-3p, miR-411-5p, miR-339-5p, miR-130a-3p, miR-27b-3p, miR-497-5p, miR-16b, miR-1285, miR-873a-5p, miR-301b-3p, miR-17-3p, novel\_1, miR-33a-3p, miR-16a, miR-20a-5p, miR-15a, miR-144-3p, miR-10a-5p, novel\_68, miR-195a-5p, miR-505-3p, miR-135b-5p, miR-450b-3p, miR-216a-3p, miR-3591-3p, miR-1306, miR-148a-3p, miR-4286, miR-29b-2-5p, miR-3064-5p, miR-200a-3p, novel\_96, miR-152-3p, miR-17-3p, miR-339a, miR-486-5p, miR-129-1-3p, miR-134-5p, miR-322-5p, miR-1224-5p, novel\_79, miR-2285ad, miR-10a-5p, miR-128-3p, miR-23b-5p, miR-501-3p, miR-134, miR-93, miR-16-5p, miR-1306-5p, miR-134-5p, miR-135a-5p, miR-144, miR-331-5p, miR-1271, miR-141-3p, miR-370-3p, miR-485-5p, miR-20b-5p, miR-23a-5p, miR-17-5p, miR-93-5p, miR-301 novel\_83, miR-455-3p, miR-23c, miR-3431, miR-23b-3p, miR-218-1-3p, miR-380-3p, miR-23b-5p, miR-1193, miR-181a-5p, miR-491-3p, let-7a-2-3p, miR-148b-5p, miR-30c-1-3p, miR-450b-5p, miR-23a-3p, miR-493-5p, miR-6240, miR-181b-5p, miR-30c-2-3p, miR-219-3p, novel\_25, miR-300-3p, miR-21-3p, miR-10b, miR-30c-1-3p, miR-190a-3p, miR-493-5p, miR-335-3p, let-7g-3p, miR-668-5p, miR-23b, miR-3591-3p, miR-129b-3p, miR-181c-5p, miR-219a-2-3p, miR-323c, miR-181d-5p, miR-499a-5p, miR-219b-3p, miR-142b, miR-218-5p

DCUN1D1 ENSOARGO(DCN1) 219-3p, novel\_25, miR-300-3p, miR-21-3p, miR-10b, miR-30c-1-3p, miR-190a-3p, miR-493-5p, miR-335-3p, let-7g-3p, miR-668-5p, miR-23b, miR-3591-3p, miR-129b-3p, miR-181c-5p, miR-219a-2-3p, miR-323c, miR-181d-5p, miR-499a-5p, miR-219b-3p, miR-142b, miR-218-5p

miR-532-5p, miR-182-5p, miR-154a-3p, miR-21-3p, miR-548o-3p, miR-545-3p, miR-221-5p, miR-504-5p, miR-155-5p, let-7i-5p, miR-204-3p, miR-544-3p, miR-377-3p, miR-6516, miR-2285c, miR-21a-3p, miR-186-5p, miR-154b-3p, let-7b, miR-539-5p, let-7b-5p, miR-769-5p, miR-664a-5p, miR-222-3p, let-7f, miR-454-3p, miR-6516-3p, miR-155-5p, miR-17-3p, miR-485-3p, miR-505-3p, miR-3600, miR-532-3p, miR-23c, miR-23b-3p, miR-7859, miR-188-3p, miR-1961, miR-2366, miR-34a-5p, miR-218-1-3p, miR-19b-3p, miR-142-3p, miR-195a-3p, miR-487a, miR-2432, miR-142a-3p, miR-29b-1-5p, miR-345-3p, miR-500a-5p, miR-324-3p, miR-26a-5p, miR-210-5p, miR-2285p, let-7k, miR-34b-5p, miR-221-5p, miR-30b-3p, miR-98-5p, miR-211-5p, miR-126b-5p, miR-499b-5p, miR-203-3p, let-7d-5p, miR-378j, miR-129b-5p, miR-221, miR-199b-5p, miR-140-5p, miR-504, miR-194b-5p, miR-9-5p, miR-2285f, miR-885-5p, miR-2447, miR-3059-5p, miR-154a, miR-1285-5p, miR-362-5p, miR-877-3p, miR-107-5p, miR-769-5p, miR-2440, miR-101-3p, miR-382-3p, miR-154-3p, miR-2284q, miR-3964, miR-335, novel\_4, miR-2285e, miR-126a-5p, miR-221-3p, miR-500-5p, miR-142-3p, miR-758-3p, miR-2284r, miR-450b-5p, miR-544a, miR-23a-3p, miR-494-3p, miR-101b-3p, let-7a-5p, miR-758-3p, miR-2310, miR-491-3p, miR-3187-3p, miR-182-5p, miR-505, miR-29b-1-5p, miR-342, miR-103a-2-5p, let-7e, miR-199b-5p, miR-130b-3p, miR-141-3p, miR-3068-3p, miR-487a-3p, miR-199a-5p, miR-769, miR-3965, miR-34c-5p, miR-300-3p, miR-362-5p, miR-3154, miR-424-3p, miR-488-3p, miR-1814c, miR-671-5p, miR-7144-5p, let-7g-3p, miR-329b, miR-500b-5p, miR-135a-5p, miR-3969, miR-100-3p, miR-331-3p, miR-6740-5p, miR-494-5p, miR-29b-3p, miR-204-5p, miR-222, miR-2285ad, novel\_121, miR-582-3p, miR-545-5p, miR-6516-5p, miR-9-5p, miR-29d-3p, miR-196a-5p, miR-345-3p, miR-155-5p, miR-128-3p, let-7d, miR-100-3p, miR-200a, miR-29a-5p, let-7f, miR-1271-3p, miR-424-5p, miR-425-5p, miR-16-5p, miR-451a, miR-21-3p, miR-424-5p, miR-410-3p, miR-15a, miR-16b, miR-2411-3p, miR-345-3p, miR-16a, miR-670-3p, miR-15a-5p, miR-322-5p, miR-15b-5p, miR-2284z, miR-3120-3p, miR-33b-3p, miR-16b, miR-195a-5p, miR-497-5p, miR-2408, miR-345-3p, miR-21a-3p, miR-374b-3p

ATP11B ENSOARGO(ATPase,

CAB39 ENSOARGO(calcium

miR-145a-5p, miR-17b-5p, miR-181a-5p, miR-1434-3p, miR-223-3p, miR-26a-2-3p, miR-2284ab, miR-380-3p, miR-16-1-3p, miR-1260b, miR-130a-3p, novel\_116, miR-2355-3p, miR-134-3p, miR-32, novel\_51, miR-7-5p, let-7f-2-3p, let-7f-2-3p, miR-654-3p, miR-22841, miR-1306, miR-3591-3p, miR-148a-3p, miR-2387, miR-505-3p, miR-19a-3p, miR-3120-3p, miR-677, miR-6535, miR-2404, miR-670-3p, novel\_87, miR-625-3p, miR-203b-5p, miR-502b, miR-199c, miR-6119-3p, miR-92a-3p, miR-379-3p, novel\_1, miR-17-3p, miR-219b-3p, novel\_27, miR-301b-3p, miR-199b-5p, miR-2284w, miR-501-3p, miR-3591-5p, miR-1290, miR-155-5p, miR-496, miR-411-3p, miR-2285ad, miR-429-3p, novel\_121, miR-217, miR-2285af, miR-1260a, miR-125a-3p, miR-664-3p, miR-200c, miR-92a-3p, miR-152-3p, miR-17-3p, miR-450a-2-3p, miR-181b-5p, miR-127-5p, miR-200c-3p, miR-30a-3p, miR-29b-2-5p, miR-4286, miR-2284y, miR-199a-5p, miR-2285b, miR-192-3p, miR-2284a, miR-92b-3p, miR-137-3p, miR-301, miR-10b-3p, miR-503-3p, miR-324-5p, miR-199a-5p, miR-133c, miR-25-3p, miR-100-3p, miR-26c, novel\_63, miR-2284k, miR-5100, miR-2332, miR-410-3p, miR-374b-3p, miR-3607-3p, miR-144-5p, miR-2284v, miR-1260b, miR-374a-3p, miR-323b, miR-7857, miR-501-3p, miR-125b-2-3p, miR-6529a, miR-21b, miR-450b-5p, miR-5010-3p, miR-145b, miR-222-5p, miR-548w, miR-199b-3p, miR-151a-3p, miR-2300a-5p, miR-148b-5p, miR-126a-5p, miR-1185-3p, miR-421, miR-539-5p, miR-2957, miR-323b-3p, miR-182-5p, miR-106b-5p, miR-199a-3p, miR-1306-5p, novel\_103, miR-199b-5p, miR-130b-3p, miR-2284b, miR-1388-3p, miR-124a, miR-491-3p, miR-2310, miR-378j, miR-140-5p, miR-199b-5p, miR-335-3p, novel\_94, miR-877-3p, miR-3963, miR-664b, miR-20a-3p, miR-144-5p, miR-1185-2-3p, miR-500-3p, miR-378g, miR-3082-5p, miR-2285y, miR-374a-3p, miR-2284q, miR-499a-5p, miR-3958-3p, miR-181d-5p, miR-3059-5p, novel\_60, miR-212-3p, miR-3956-3p, miR-

FXR1      ENSOARGO( fragile

miR-3064-5p, miR-30a-3p, miR-29b-2-5p, miR-28b, miR-192-3p, miR-3065-3p, miR-29a-5p, miR-200c, miR-219-3p, miR-1260a, miR-200c-3p, miR-181b-5p, miR-17-3p, novel\_96, miR-200a-3p, miR-429-3p, miR-299a-3p, miR-322-5p, miR-302a-5p, novel\_121, miR-129-1-3p, miR-1290, miR-330-5p, miR-2427, miR-582-3p, miR-200b-3p, miR-155-5p, miR-1306-5p, miR-16-5p, miR-1260b, miR-93, miR-365a-5p, miR-145-3p, miR-5100, miR-34c-3p, miR-767-5p, miR-3068-3p, miR-141-3p, miR-2355-5p, miR-370-3p, miR-331-5p, miR-324-5p, miR-17-5p, miR-93-5p, miR-10b-3p, miR-767, miR-671-5p, miR-485-5p, miR-1814c, miR-20b-5p, miR-6240, miR-493-5p, miR-130b-5p, miR-628-5p, miR-668-3p, miR-654-3p, miR-377-3p, miR-17-5p, novel\_51, miR-106a-5p, miR-365b-5p, miR-124-5p, miR-378a-5p, miR-466f-3p, miR-193a-3p, miR-185-5p, miR-3431, miR-412-5p, miR-20b, miR-544b, miR-194-3p, miR-181a-5p, miR-145a-5p, miR-3071-5p, miR-197-3p, miR-1260b, miR-16b, miR-497-5p, miR-342-3p, miR-17-3p, miR-193b-3p, miR-326-3p, novel\_27, miR-20a-5p, miR-28c, miR-15a, miR-4324, novel\_87, miR-16a, miR-3120-3p, miR-411b-3p, miR-299b-3p, miR-146b-3p, miR-181b-3p, miR-677, miR-669, miR-195a-5p, miR-6395, miR-2285w, miR-20a, miR-376c-3p, miR-181b-1-3p, miR-125b-2-3p, miR-664b-3p, miR-376a-5p, miR-2432, miR-324-3p, miR-216a-5p, miR-760-3p, miR-466i-5p, miR-106a, miR-299-3p, miR-106a, miR-30d-3p, miR-3600, miR-340-5p, miR-15a-5p, miR-200b, miR-222-5p, miR-383-5p, miR-328-3p, miR-532-3p, miR-2284h-5p, miR-193b-5p, let-7a-3p, miR-361-5p, miR-129-2-3p, miR-665-5p, miR-98-3p, miR-6525, miR-181c-5p, miR-30e-3p, miR-2285j, let-7b-3p, miR-29b-2-5p, miR-151-3p, miR-219b-3p, miR-324-3p, miR-30a-3p, miR-6516-3p, miR-155-5p, miR-17-3p, miR-130b-5p, miR-500, miR-424-5p, miR-532-5p, miR-182-5p, miR-3065-3p, miR-130-5p, miR-193b-3p, miR-544-3p, miR-377-

miR-378j, miR-9-3p, miR-2285u, miR-27a-3p, miR-2483-3p, miR-101-3p, miR-3968, miR-2284j, miR-194b-5p, miR-363-3p, miR-412-3p, miR-758-3p, miR-484, miR-101c, miR-2284aa, miR-1388-5p, miR-27a-3p, miR-145b, miR-548w, novel\_78, miR-455-3p, miR-9788-3p, miR-2459, miR-421, miR-147a, miR-199a-3p, novel\_103, miR-146b, miR-744-3p, miR-124a, miR-1388-3p, miR-193a, miR-758-3p, miR-129b-3p, miR-500a-3p, miR-450a-1-3p, novel\_99, let-7g-3p, miR-545-3p, miR-32-5p, miR-548o-3p, miR-320e, miR-2285j, miR-30e-3p, miR-208b-5p, miR-500, miR-129-5p, miR-130b-5p, novel\_74, miR-450b-3p, miR-425-5p, miR-539-5p, miR-129-2-3p, miR-6525, miR-224-5p, miR-124-3p, miR-217-5p, novel\_73, miR-33b-3p, miR-30d-3p, miR-199a-3p, miR-2284h-5p, miR-7859, miR-222-5p, miR-200b, miR-299-3p, miR-21-3p, miR-466i-5p, miR-2285w, miR-2432, miR-2424, miR-146a-5p, miR-130a-5p, miR-3065-5p, miR-146b-5p, miR-7-1-3p, miR-299b-3p, novel\_87, miR-4324, miR-576-3p, miR-656-5p, miR-147-5p, miR-92a-3p, miR-6119-3p, miR-495-3p, miR-219b-3p, miR-374c-5p, miR-3959-3p, miR-431-3p, miR-450c-3p, miR-194-5p, miR-145a-5p, miR-1285, miR-1434-3p, miR-744-5p, miR-27b-3p, miR-2284ab, miR-31-5p, miR-2284d, miR-3431, miR-32, miR-194a, miR-224-5p, miR-146a, miR-130b-5p, let-7a-2-3p, miR-2284l, miR-488-3p, miR-503-3p, miR-7144-5p, miR-671-5p, miR-1248, let-7g-3p, miR-2285aa, miR-574-5p, miR-25-3p, miR-551b-3p, miR-2284k, miR-6128, miR-193a-5p, miR-2284v, miR-323-3p, miR-200b-3p, let-7a-2-3p, miR-412, miR-299a-3p, miR-6517, miR-429-3p, miR-2284z, miR-450a-1-3p, miR-129-1-3p, novel\_121, miR-24-2-5p, miR-217, miR-6119-5p, miR-200c, miR-92a-3p, miR-450a-2-3p, miR-200c-3p, miR-490-3p, miR-92b-3p, miR-30d-3p, miR-199b-3p, miR-106a, miR-20b, novel\_121, miR-545-5p, miR-125b-2-3p, miR-345-3p, miR-20a, miR-30a-3p, miR-106a-5p, miR-106a-5p, miR-106b-5p, miR-17-5p, miR-2411-3p, miR-345-3p, miR-205-5p, miR-21-3p, miR-106a, miR-2319b, miR-17-5p, miR-93-5p, miR-409-5p, miR-1248, miR-20b-5p, miR-452-5p, miR-219b-3p, miR-7705, miR-93, miR-30a-3p, miR-30e-3p, miR-20a-5p, miR-6402, miR-218-5p, miR-199c, miR-628-3p

PDE6H ENSOARGO( phosphod

MRPL47 ENSOARGO( mitochon

miR-103, miR-194-3p, miR-2285g, miR-2284d, miR-66b, miR-130a-3p, miR-103a-3p, miR-187-3p, miR-744-5p, miR-497-5p, miR-219a-1-3p, miR-1260b, miR-450c-3p, miR-22-3p, miR-1434-3p, miR-503-3p, miR-345-5p, let-7a-2-3p, miR-6412, miR-539-3p, miR-654-3p, miR-628-5p, miR-668-3p, miR-6240, miR-130b-5p, miR-2285l, novel\_51, miR-330-3p, miR-105-5p, miR-411b-3p, miR-670-3p, miR-7-1-3p, miR-107, miR-378b, miR-3591-3p, miR-18a-3p, miR-1306, miR-3970, miR-148a-3p, miR-2387, miR-301b-3p, miR-199b-5p, miR-2284w, miR-371b-3p, miR-2285x, miR-135a-2-3p, miR-502b, miR-147-5p, miR-656-5p, miR-6119-3p, novel\_87, miR-576-3p, miR-4324, miR-15a, miR-450a-1-3p, miR-134-5p, miR-2411-5p, miR-302a-5p, miR-322-5p, miR-412, miR-6517, miR-429-3p, miR-2285ad, let-7a-2-3p, miR-105-2, miR-134, miR-450c-5p, miR-376c-5p, miR-200a, miR-148b-5p, miR-450b-5p, novel\_127, miR-152-3p, miR-200a-3p, miR-107, miR-200c-3p, miR-664-3p, miR-200c, miR-205-5p, miR-1260a, miR-2285af, miR-199a-5p, miR-3965, miR-300-3p, miR-215-5p, miR-141-3p, miR-370-3p, miR-487a-3p, miR-574-5p, miR-671-5p, miR-7144-5p, miR-345-5p, let-7g-3p, miR-2318, miR-2474, miR-10b-3p, miR-145-3p, miR-1260b, miR-323-3p, miR-16-5p, miR-193a-5p, miR-1306-5p, miR-486b-3p, miR-134-5p, novel\_63, miR-2285e, miR-421, miR-2459, miR-455-3p, miR-148b-5p, miR-105-1, miR-330-3p, miR-1343-3p, miR-1839-5p, miR-21b, miR-1388-5p, miR-412-3p, miR-6529a, miR-296-5p, miR-652-5p, miR-376b, miR-744-3p, miR-424-5p, miR-1468, miR-103a-2-5p, miR-214-3p, miR-199b-5p, miR-130b-3p, miR-505, miR-1306-5p, miR-199a-3p, miR-203-3p, miR-499a-3p, miR-7857-3p, miR-7977, miR-2285u, miR-2319b, miR-2284g, miR-664b, miR-4792, novel\_94, miR-299b-5p, miR-129b-5p, miR-199b-5p, miR-409-5p, miR-361-3p, miR-7705, miR-1285-5p, miR-877-3p, miR-361-3p, miR-219a-5p, miR-452-5p, miR-3956-3p, novel\_60, miR-377-3p, miR-27a-3p, miR-378b, miR-499b-5p, miR-26b-5p, miR-96-5p, novel\_48, miR-9851-3p, miR-379-5p, miR-137-3p, miR-216a-3p, miR-224-5p, miR-1271, miR-495-3p, miR-452-5p, miR-450b-3p, miR-2284q, miR-151-3p, miR-1271-5p, novel\_116, miR-151a-3p, miR-105-1, miR-548w, miR-27a-3p, miR-105-2, miR-1839-5p, miR-128-3p, miR-27b-3p, miR-450c-3p, miR-125b-2-3p, miR-130a-5p, miR-193a, miR-2284y, miR-2284a, miR-2284b, miR-224-5p, miR-26a-5p, miR-377-3p, miR-197-5p, miR-105-5p

miR-412, miR-7641, miR-412-5p, miR-381-3p, miR-655, miR-412-3p, miR-412-3p, miR-1983, miR-2285x, miR-374c-5p, miR-29a-5p, miR-107-5p, miR-655-3p, miR-3071-3p, miR-216a-5p, miR-103a-2-5p, miR-3964

BOLA1 ENSOARGO(bola fam 107, miR-200c-3p, miR-664-3p, miR-200c, miR-205-5p, miR-1260a, miR-2285af, miR-199a-5p, miR-3965, miR-300-3p, miR-215-5p, miR-141-3p, miR-370-3p, miR-487a-3p, miR-574-5p, miR-671-5p, miR-7144-5p, miR-345-5p, let-7g-3p, miR-2318, miR-2474, miR-10b-3p, miR-145-3p, miR-1260b, miR-323-3p, miR-16-5p, miR-193a-5p, miR-1306-5p, miR-486b-3p, miR-134-5p, novel\_63, miR-2285e, miR-421, miR-2459, miR-455-3p, miR-148b-5p, miR-105-1, miR-330-3p, miR-1343-3p, miR-1839-5p, miR-21b, miR-1388-5p, miR-412-3p, miR-6529a, miR-296-5p, miR-652-5p, miR-376b, miR-744-3p, miR-424-5p, miR-1468, miR-103a-2-5p, miR-214-3p, miR-199b-5p, miR-130b-3p, miR-505, miR-1306-5p, miR-199a-3p, miR-203-3p, miR-499a-3p, miR-7857-3p, miR-7977, miR-2285u, miR-2319b, miR-2284g, miR-664b, miR-4792, novel\_94, miR-299b-5p, miR-129b-5p, miR-199b-5p, miR-409-5p, miR-361-3p, miR-7705, miR-1285-5p, miR-877-3p, miR-361-3p, miR-219a-5p, miR-452-5p, miR-3956-3p, novel\_60, miR-377-3p, miR-27a-3p, miR-378b, miR-499b-5p, miR-26b-5p, miR-96-5p, novel\_48, miR-9851-3p, miR-379-5p, miR-137-3p, miR-216a-3p, miR-224-5p, miR-1271, miR-495-3p, miR-452-5p, miR-450b-3p, miR-2284q, miR-151-3p, miR-1271-5p, novel\_116, miR-151a-3p, miR-105-1, miR-548w, miR-27a-3p, miR-105-2, miR-1839-5p, miR-128-3p, miR-27b-3p, miR-450c-3p, miR-125b-2-3p, miR-130a-5p, miR-193a, miR-2284y, miR-2284a, miR-2284b, miR-224-5p, miR-26a-5p, miR-377-3p, miR-197-5p, miR-105-5p

TMX1 ENSOARGO(thioredo: 5p, novel\_116, miR-151a-3p, miR-105-1, miR-548w, miR-27a-3p, miR-105-2, miR-1839-5p, miR-128-3p, miR-27b-3p, miR-450c-3p, miR-125b-2-3p, miR-130a-5p, miR-193a, miR-2284y, miR-2284a, miR-2284b, miR-224-5p, miR-26a-5p, miR-377-3p, miR-197-5p, miR-105-5p

GNB4 ENSOARGO(guanine : miR-412, miR-7641, miR-412-5p, miR-381-3p, miR-655, miR-412-3p, miR-412-3p, miR-1983, miR-2285x, miR-374c-5p, miR-29a-5p, miR-107-5p, miR-655-3p, miR-3071-3p, miR-216a-5p, miR-103a-2-5p, miR-3964

miR-2284w, miR-326-3p, miR-29c-3p, miR-17-3p, miR-3957-3p, miR-135a-2-3p, miR-147-5p, miR-502b, miR-656-5p, miR-29a, miR-16a, miR-502-5p, miR-15a, miR-181b-3p, miR-677, miR-6535, miR-374c-3p, novel\_69, miR-299b-3p, miR-29a-3p, miR-3120-3p, miR-7-1-3p, miR-3074-5p, miR-195a-5p, miR-146b-5p, miR-19a-3p, miR-450b-3p, miR-150-5p, miR-148a-3p, miR-345-5p, miR-2284l, miR-432-3p, miR-654-3p, miR-432-3p, miR-628-5p, miR-363-5p, miR-6240, miR-452-5p, miR-2285l, miR-378a-5p, miR-2411-3p, miR-194a, miR-330-3p, miR-146a, miR-503-5p, miR-544b, miR-149-5p, miR-134-3p, miR-185-5p, miR-503-5p, miR-3431, miR-432-5p, miR-2284d, miR-3535, miR-26b-3p, miR-133b-5p, miR-2284x, miR-497-5p, miR-30b-3p, miR-29b, miR-2284ab, miR-16b, miR-145a-5p, novel\_23, miR-194-5p, miR-374b-3p, miR-450c-3p, miR-197-3p, miR-22-3p, miR-2113, miR-1285, miR-432, miR-873a-5p, miR-708-3p, miR-145-3p, miR-16-5p, miR-2284v, miR-1306-5p, miR-28a-3p, miR-28-5p, miR-486b-3p, miR-6740-5p, miR-331-3p, miR-100-3p, miR-29b-3p, miR-2284k, miR-2284n, miR-300-3p, miR-141-3p, miR-671-5p, miR-345-5p, miR-10b-3p, miR-30e-5p, miR-2284a, miR-490-3p, miR-192-3p, miR-1271-3p, miR-2285b, miR-2284y, miR-148b-5p, miR-181a-2-3p, miR-200a-3p, miR-152-3p, miR-200c-3p, miR-28-3p, miR-450a-2-3p, miR-17-3p, miR-2898, miR-30c-2-3p, miR-200c, miR-486-5p, novel\_121, miR-450a-1-3p, miR-6516-5p, miR-322-5p, miR-7641, miR-429-3p, miR-299a-3p, miR-200b-3p, miR-330-5p, miR-23b-5p, miR-29d-3p, miR-345-3p, novel\_111, miR-877-3p, miR-2284j, miR-194b-5p, miR-2447, miR-3059-5p, miR-2285t, miR-30b-5p, miR-2483-3p, miR-378g, miR-7689-3p, miR-2319b, miR-20a-3p, miR-2284g, novel\_94, miR-30c-1-3p, miR-33a-5p, miR-2284b, miR-424-5p, miR-214-3p, miR-146b, miR-16b, miR-326, miR-1298-3p, miR-145b, miR-181b-2-3p, miR-1343-3p, novel\_4, miR-2300a-5p, miR-330-3p, miR-16-2-3p, miR-450b-3p, miR-129-5p, novel\_99, miR-199c, miR-10b-3p, novel\_1, miR-199a-3p, miR-873a-5p, miR-199a-3p, let-7j, miR-412-5p, miR-3959-3p, miR-199b-3p, miR-101b-3p

ARHGD1B ENSOARGO(Rho GDP

NID2 ENSOARGO(nidogen

miR-130b-5p, miR-708-5p, miR-487a-5p, miR-208b-5p, miR-129-5p, miR-454-3p, miR-17-3p, miR-338-5p, miR-19b-1-5p, miR-6134, miR-6525, miR-665-5p, miR-582-5p, miR-625-5p, miR-154b-3p, miR-2312, miR-30d-5p, miR-2285c, miR-299, miR-21a-3p, miR-151b, miR-204-3p, miR-139-5p, miR-193b-3p, miR-582-5p, miR-544-3p, miR-301a-3p, miR-6516, miR-532-5p, miR-154a-3p, miR-370-5p, miR-504-5p, miR-30c-1-3p, miR-2331-3p, miR-30d, miR-345-3p, miR-143-3p, miR-146a-5p, miR-376a-5p, miR-345-3p, miR-195a-3p, miR-487a, miR-329a-5p, miR-361-5p, miR-378d, miR-19b-3p, miR-493-3p, miR-140-3p, miR-217-5p, miR-2904, miR-193b-5p, miR-376a-5p, miR-328-3p, miR-151-5p, novel\_83, miR-23c, miR-148b-3p, miR-7859, miR-487a-3p, miR-23b-3p, miR-212-5p, miR-505-3p, miR-485-3p, miR-3600, miR-18a-3p, miR-548e-3p, miR-154-3p, miR-1973, miR-9-5p, miR-2285f, miR-2447, miR-504, miR-3963, miR-1185-2-3p, miR-27a-3p, miR-3082-5p, miR-3596, miR-2285u, miR-20a-3p, miR-452-3p, miR-3064-5p, miR-139-5p, miR-146b, miR-130b-3p, miR-3085-3p, miR-505, miR-323b-3p, miR-326, miR-8485, miR-30c-1-3p, miR-744-3p, miR-376b, miR-23a-3p, miR-101b-3p, miR-2426, miR-544a, miR-412-3p, miR-323b, miR-1185-3p, miR-421, miR-2285e, miR-216a-3p, miR-147a, miR-539-5p, miR-27a-3p, miR-5010-3p, miR-105-1, miR-330-3p, novel\_78, novel\_4, miR-2300a-5p, miR-28-5p, miR-410-3p, novel\_9, miR-370-5p, miR-5100, miR-2332, miR-29b-3p, novel\_63, miR-3607-3p, miR-1248, miR-23a-5p, miR-10b-3p, miR-23b, miR-30e-5p, miR-488-3p, miR-133c, miR-141-3p, miR-2285aa, miR-3068-3p, miR-487a-3p, novel\_127, miR-543-5p, miR-152-3p, miR-200a-3p, miR-107, miR-17-3p, miR-217, miR-30f, miR-30c-2-3p, miR-205-5p, miR-2285b, miR-450b-5p, miR-148b-5p, miR-3064-5p, miR-105-2, miR-582-3p, miR-30a-5p, miR-330-5p, miR-29d-3p, miR-3591-5p, miR-345-3p, novel\_121, miR-214-5p, miR-6516-5p, miR-9-5p, miR-302a-5p, miR-412, miR-



miR-3529-3p, miR-4286, miR-200a, miR-450c-5p, miR-2285af, miR-200c, miR-30f, miR-200c-3p, miR-181b-5p, miR-152-3p, miR-2285ad, miR-429-3p, miR-505-5p, miR-302a-5p, miR-2284z, miR-582-3p, miR-545-5p, miR-218-2-3p, miR-330-5p, miR-501-3p, miR-411-3p, miR-200b-3p, miR-105-2, miR-10a-5p, miR-1306-5p, miR-103b, miR-34c-3p, miR-144, miR-135a-5p, miR-542-5p, miR-2285aa, miR-34c-5p, miR-2284n, miR-320a, miR-329b, miR-1814c, miR-493-5p, miR-6240, miR-2483-5p, miR-224-5p, miR-377-3p, miR-32, miR-105-5p, miR-330-3p, miR-193a-3p, miR-130a-3p, miR-542-3p, miR-181a-5p, miR-2113, miR-380-3p, miR-193b-3p, miR-495-3p, miR-326-3p, miR-449a, miR-301b-3p, miR-142b, miR-576-3p, miR-34c, miR-379-3p, novel\_1, miR-625-3p, miR-655-5p, miR-10a-5p, miR-34b, miR-144-3p, miR-320c, miR-148a-3p, miR-3065-5p, miR-135b-5p, miR-2432, miR-2285p, miR-320d, miR-2284m, miR-34b-5p, miR-21-3p, miR-548e-3p, miR-1b-3p, miR-7859, miR-200b, miR-148b-3p, miR-1434-5p, miR-140-3p, miR-5703, miR-4429, miR-34a-5p, miR-590-3p, miR-145a-3p, miR-2330-3p, miR-10b-5p, miR-6525, miR-224-5p, miR-181c-5p, miR-2285j, miR-6516-3p, miR-487a-5p, miR-454-3p, miR-1468-5p, miR-129-5p, miR-32-5p, miR-548o-3p, miR-10a, miR-377-3p, miR-301a-3p, miR-499b-3p, miR-656-3p, miR-193b-3p, miR-216b-5p, let-7g-3p, miR-186-5p, miR-101b-3p, miR-376b, miR-652-5p, miR-3187-3p, miR-2310, miR-491-3p, miR-1b-5p, miR-320b, miR-326, miR-130b-3p, miR-1468, miR-1343-3p, miR-105-1, miR-330-3p, miR-5010-3p, miR-539-5p, miR-126a-5p, miR-10b, miR-301b-5p, miR-501-3p, miR-125b-2-3p, miR-2284aa, miR-363-3p, miR-452-5p, miR-181d-5p, novel\_111, miR-502-3p, miR-2285n, miR-2285y, miR-301a-5p, miR-450a-5p, miR-3964, miR-20a-3p, miR-2285u, miR-126b-5p, miR-499a-3p, miR-3082-5p, miR-2483-3p, miR-500-3p, miR-493-5p

|         |                   |                                                                                                                                                                                                                                                                                                                                                                                                                                                                                                                                                                                                                                                                                                                                                                                                                                                                                                                                                                                                                                                                                                                                                                                                                                                                                                                                                                                                                                                                                                                                                                                                                                                                                                                                                                                                                                                                                       |
|---------|-------------------|---------------------------------------------------------------------------------------------------------------------------------------------------------------------------------------------------------------------------------------------------------------------------------------------------------------------------------------------------------------------------------------------------------------------------------------------------------------------------------------------------------------------------------------------------------------------------------------------------------------------------------------------------------------------------------------------------------------------------------------------------------------------------------------------------------------------------------------------------------------------------------------------------------------------------------------------------------------------------------------------------------------------------------------------------------------------------------------------------------------------------------------------------------------------------------------------------------------------------------------------------------------------------------------------------------------------------------------------------------------------------------------------------------------------------------------------------------------------------------------------------------------------------------------------------------------------------------------------------------------------------------------------------------------------------------------------------------------------------------------------------------------------------------------------------------------------------------------------------------------------------------------|
| SPATA16 | ENSOARGO(spermato | <p>miR-216a-5p, miR-30c-2-3p, miR-125a-3p, miR-30b-3p, miR-21-3p, miR-2898, miR-466i-5p, miR-1, miR-181a-2-3p, miR-2285w, miR-199a-5p, miR-130a-5p, miR-98-3p, miR-29d-3p, miR-23b-5p, miR-330-5p, miR-188-3p, miR-134, miR-155-5p, let-7a-3p, miR-7641, miR-134-5p, miR-532-3p, miR-2284h-5p, miR-210-3p, miR-29b-3p, let-7b-3p, miR-134-5p, miR-204-5p, miR-138-5p, novel_74, miR-487b-5p, miR-664a, miR-3958-5p, miR-2330-3p, miR-1306-5p, miR-433-5p, miR-145a-3p, miR-500b-5p, miR-206-3p, miR-374a-3p, miR-98-3p, miR-1197-3p, miR-137-3p, miR-362-5p, miR-21a-3p, miR-488-3p, miR-301, let-7f-1-3p, miR-2285c, miR-23a-5p, miR-625-5p, miR-485-5p, miR-1248, miR-1827, let-7g-3p, miR-2355-5p, miR-1271, miR-182-5p, miR-552-3p, miR-30c-1-3p, novel_32, miR-199a-5p, miR-154b-5p, miR-155-5p, miR-216b-5p, miR-197-5p, miR-182-5p, miR-2331-5p, miR-326, miR-199b-5p, miR-378a-5p, miR-363-5p, miR-758-3p, miR-2310, miR-654-3p, miR-30c-1-3p, miR-1a-3p, miR-758-3p, miR-30b-3p, miR-4791, miR-1434-3p, miR-301b-5p, miR-2113, miR-26a-2-3p, miR-29b, miR-138, miR-30b-3p, miR-1388-5p, miR-219a-1-3p, miR-500-5p, miR-2285e, miR-3535, miR-2285g, miR-1298-3p, miR-539-5p, miR-371a-5p, miR-301a-5p, miR-382-5p, miR-2285t, miR-421-5p, miR-656-5p, miR-4726-5p, miR-29a, miR-206, miR-29c-3p, miR-3059-5p, novel_60, miR-3956-3p, miR-326-3p, miR-1285-5p, miR-199b-5p, miR-211, miR-362-5p, miR-371b-3p, miR-378b, miR-199b-5p, miR-2319a, miR-379-5p, miR-410-5p, miR-136-5p, miR-211-5p, miR-454-5p, miR-3082-5p, miR-2483-3p, miR-29a-3p</p> <p>miR-421-5p, miR-423-5p, miR-3184-5p, miR-6240, miR-193b-3p, miR-193a-3p, miR-208b-5p, miR-421-5p, miR-618, miR-345-3p, miR-2411-3p, miR-330-3p, miR-371a-5p, miR-197-5p, miR-100-3p, miR-193b-3p, miR-25, miR-133c, miR-330-3p, miR-216b-3p, miR-31-5p, miR-370-3p, miR-10b-3p, miR-3120-5p, miR-345-3p, miR-2284r</p> |
| NCEH1   | ENSOARGO(neutral  |                                                                                                                                                                                                                                                                                                                                                                                                                                                                                                                                                                                                                                                                                                                                                                                                                                                                                                                                                                                                                                                                                                                                                                                                                                                                                                                                                                                                                                                                                                                                                                                                                                                                                                                                                                                                                                                                                       |

miR-1306-5p, miR-193a-5p, miR-145-3p, miR-2433, miR-331-3p, miR-125b-5p, miR-100-3p, miR-486b-3p, miR-28-5p, miR-874-3p, miR-370-3p, miR-2355-5p, miR-125a, miR-34c-5p, miR-329a, miR-485-5p, miR-3064-5p, miR-29a-5p, miR-30c-2-3p, miR-2898, miR-17-3p, miR-450a-2-3p, miR-543-5p, novel\_96, novel\_127, miR-299a-3p, miR-412, miR-2411-5p, miR-330-5p, novel\_101, miR-17-3p, miR-24-3p, miR-326-3p, novel\_27, miR-449a, miR-576-3p, miR-34c, miR-128-1-5p, miR-502b, miR-2404, miR-299b-3p, novel\_69, miR-34b, miR-669, miR-18a-3p, miR-1291, miR-363-5p, miR-628-5p, novel\_51, miR-125a-5p, miR-3431, miR-194-3p, miR-2355-3p, miR-542-3p, miR-197-3p, miR-22-3p, miR-30b-3p, miR-381-5p, miR-4508, miR-744-5p, miR-7862, miR-145a-3p, miR-3184-3p, miR-214, miR-425-5p, miR-3184-5p, miR-338-3p, miR-2285j, miR-15b-3p, miR-324-3p, miR-664a-5p, miR-320e, novel\_74, miR-17-3p, miR-708-5p, miR-500, miR-874-5p, miR-221-5p, miR-504-5p, miR-30c-1-3p, miR-216b-3p, miR-22-3p, miR-500a-3p, miR-183-5p, miR-486-3p, miR-2411, novel\_17, miR-324-3p, miR-185-3p, miR-125b, miR-760-3p, miR-34b-5p, miR-221-5p, miR-299-3p, miR-18a-3p, miR-548e-3p, miR-212-5p, miR-7859, miR-362-3p, miR-2904, miR-1193, miR-34a-5p, miR-378d, miR-361-3p, novel\_111, miR-423-5p, miR-2285n, miR-4726-5p, miR-2285t, miR-3064-5p, miR-361-3p, miR-129b-5p, miR-504, miR-30c-1-3p, miR-326, miR-362-3p, miR-491-5p, miR-3085-3p, miR-25-5p, miR-381-5p, miR-214-3p, miR-2300a-5p, novel\_4, miR-5010-3p, miR-9788-3p, miR-329-3p, miR-484, miR-412-3p, miR-30b-3p, miR-362-3p, miR-2426, miR-301b-5p, miR-18b, miR-19b-2-5p, miR-18a, miR-145a-5p, miR-18a-5p, miR-876-3p, miR-1814c, miR-7975, miR-218-1-3p, miR-2319a, miR-10b, miR-140-5p, miR-18b-5p, miR-145b, miR-758-5p, miR-147a, miR-27a-5p, novel\_25, miR-301a-5p, miR-19b-1-5p, miR-3653-3p, miR-590-3p, miR-877-3p, miR-2310

DIS3L2 ENSOARGO(DIS3 lik

FNDC3B ENSOARGO(fibronec

miR-330-3p, miR-199b-3p, miR-1343-3p, miR-539-5p, miR-153, miR-421, miR-1185-3p, miR-148b-5p, miR-455-3p, miR-301b-5p, miR-541, miR-758-3p, miR-501-3p, miR-1388-5p, miR-21b, miR-101b-3p, miR-23a-3p, miR-16b, miR-29b-1-5p, miR-214-3p, miR-153-3p, miR-2319b, miR-139-5p, miR-2483-3p, miR-378g, miR-3596, miR-500-3p, miR-1185-2-3p, miR-221, miR-504, miR-668-5p, miR-1983, miR-335-3p, miR-493-5p, miR-2447, miR-9-5p, miR-218-5p, miR-301a-5p, miR-499a-5p, miR-3968, miR-30d-3p, miR-380-5p, miR-23c, miR-7859, miR-23b-3p, miR-1247-5p, miR-98-3p, novel\_73, miR-148a-5p, miR-34a-5p, miR-16-1-3p, miR-664-5p, miR-503-5p, miR-345-3p, miR-142a-3p, miR-664b-3p, miR-376a-5p, miR-486-3p, novel\_17, miR-26a-5p, miR-92a-1-5p, miR-345-3p, miR-2484, miR-2331-3p, miR-504-5p, miR-296-3p, miR-216b-3p, miR-216b-5p, miR-15b-5p, miR-487b-5p, miR-625-5p, miR-3074-5p, miR-214, miR-98-3p, miR-6525, miR-769-5p, miR-30e-3p, let-7b-3p, miR-30a-3p, miR-487b-5p, miR-4492, miR-874-5p, miR-31-5p, miR-3431, miR-134-3p, novel\_116, miR-149-5p, miR-194-3p, miR-432, miR-16-1-3p, miR-16b, miR-188-5p, miR-497-5p, miR-6240, miR-493-5p, let-7f-2-3p, let-7f-2-3p, let-7a-2-3p, miR-296-3p, novel\_51, miR-2411-3p, miR-378a-5p, miR-3074-5p, miR-3120-3p, miR-26b-5p, miR-299b-3p, novel\_69, miR-144-3p, miR-6535, miR-3065-5p, miR-3591-3p, miR-1306, miR-412-3p, miR-335-5p, miR-758-5p, miR-576-3p, miR-4324, miR-6123, miR-6517, miR-299a-3p, miR-2285ad, miR-18b-5p, miR-505-5p, miR-9-5p, miR-322-5p, miR-1290, miR-330-5p, miR-23b-5p, miR-1343-5p, miR-2427, miR-148b-5p, miR-192-3p, miR-200a, miR-30f, miR-127-5p, miR-125a, miR-1271, miR-2285aa, miR-300-3p, miR-23b, miR-876-3p, miR-16-5p, miR-1260b, miR-494-5p, miR-100-3p, miR-6740-5p, miR-125b-5p, novel\_4, miR-2300a-5p, miR-409b, miR-222-5p, miR-142-3p, miR-221-3p, miR-484, miR-6529a, miR-450b-5p, miR-424-5p, miR-758-3p, miR-494-3p, miR-487a, miR-181a-2-3p, miR-101-5p, miR-125b-2-3p, miR-2285r, miR-345-5p, miR-8485, miR-4532, miR-3065-3p, miR-210-5p, miR-377-3p, miR-181b-5p, miR-1a-2-5p, miR-2284m, miR-21-3p, miR-214-3p, miR-2300a-5p, miR-5010-3p, miR-2284d, miR-9-5p, novel\_83, miR-2113, miR-181a-5p, miR-296-5p, miR-299a-5p, novel\_73, miR-4510, miR-1a-1-5p, miR-3059-5p, miR-214, miR-495-3p, miR-2284j, miR-9-5p, miR-181d-5p, miR-2330-3p, miR-877-3p, miR-181c-5p, miR-2284w, miR-1-5p, miR-218-5p, miR-2284k, miR-499a-5p, miR-147-5p, miR-154-3p, miR-487a-3p, miR-3065-3p, miR-154a-3p, miR-3082-5p, miR-6130, miR-365a-3p, miR-2284n, miR-133c, miR-21a-3p, miR-378j, miR-345-5p, miR-154b-3p, miR-412-3p, miR-345-5p, miR-1248, miR-1983, miR-186-5p, miR-543-3p

THNSL2

ENSOARGO(threonin

TEX37

ENSOARGO(testis e

|        |                     |                                                                                                                                                                                                                                                                                                                                                                                                                                                                                                                                                                                                                                          |
|--------|---------------------|------------------------------------------------------------------------------------------------------------------------------------------------------------------------------------------------------------------------------------------------------------------------------------------------------------------------------------------------------------------------------------------------------------------------------------------------------------------------------------------------------------------------------------------------------------------------------------------------------------------------------------------|
|        |                     | miR-4429, novel_73, miR-138, miR-5703, miR-1197-5p, miR-412-3p, miR-412-5p, miR-9788-3p, miR-455-3p, miR-151-5p, miR-18a-3p, miR-412, miR-320d, miR-450a-2-3p, novel_127, miR-2285af, miR-320b, novel_51, miR-219b-5p, miR-2285b, miR-345-5p, miR-3065-3p, miR-345-5p, miR-345-5p, miR-136-5p, miR-7144-                                                                                                                                                                                                                                                                                                                                 |
| APH1A  | ENSOARGOC APH1A gal | 5p, miR-301, miR-361-3p, miR-320a, miR-18a-3p, miR-129b-3p, miR-323-5p, miR-2404, miR-323a-5p, miR-151b, miR-320c, miR-204-3p, miR-615-5p, miR-211-5p, miR-3065-3p, miR-655-5p, miR-138-5p, miR-4726-5p, miR-204-5p, miR-4324, novel_82, miR-320e, miR-665, miR-211, miR-2447, miR-539-5p, miR-2285x, miR-665-5p, miR-193a-5p<br>miR-2284w, miR-361-3p, miR-3959-3p, miR-194b-5p, miR-214, miR-129-2-3p, miR-3074-5p, miR-22-5p, miR-331-3p, miR-371a-5p, miR-125b-5p, miR-301a-5p, miR-6402, miR-582-5p, miR-3959-5p, miR-299b-3p, miR-125a, miR-20a-3p, miR-3074-5p, miR-7975, miR-582-5p, miR-10b-3p, miR-129b-5p, miR-2387, miR-29a- |
| CA12   | ENSOARGOC carbonic  | 5p, miR-1271-3p, miR-181a-2-3p, miR-125a-5p, miR-299-3p, miR-21-3p, miR-214-3p, miR-194a, novel_51, miR-125b, miR-455-5p, novel_17, miR-149-5p, novel_121, miR-129-1-3p, miR-505-5p, miR-7641, miR-212-5p, miR-2285ad, miR-299a-3p, miR-455-5p, miR-2904, miR-194-5p, miR-1197-5p, miR-1193, miR-301b-5p, miR-2113, miR-1434-3p<br>miR-329a, miR-18a-5p, miR-362-3p, miR-23a-5p, miR-362-3p, miR-223-3p, miR-18b, miR-329-3p, miR-18a, miR-142-3p, miR-                                                                                                                                                                                  |
| ATF7IP | ENSOARGOC activati  | 3596, miR-548o-3p, miR-1277-3p, miR-30c-1-3p, miR-18b-5p, miR-6119-3p, miR-6119-5p, miR-219-3p, novel_63, miR-2285af, novel_87, miR-219b-3p, miR-362-3p, miR-30f, miR-30c-2-3p, miR-142a-3p, miR-30c-1-3p, miR-219a-2-3p<br>miR-500, miR-500a-3p, miR-19b-1-5p, miR-194a, miR-194-5p, miR-                                                                                                                                                                                                                                                                                                                                               |
| LACTB  | ENSOARGOC lactamas  | 3065-5p, miR-2285j, novel_82, miR-19b-2-5p, miR-2285u, miR-194b-5p                                                                                                                                                                                                                                                                                                                                                                                                                                                                                                                                                                       |

miR-2319a, miR-216a-3p, miR-3970, miR-3141, miR-376b-5p, miR-320c, miR-6535, miR-144-3p, miR-374c-3p, miR-26b-5p, miR-3074-5p, miR-6123, miR-485-3p, miR-2284w, miR-335-5p, miR-1a-1-5p, miR-2284x, novel\_23, miR-19b-2-5p, miR-103a-3p, miR-31-5p, miR-378a-5p, miR-483-3p, miR-194a, miR-2411-3p, novel\_51, miR-3141, let-7a-2-3p, miR-432-3p, miR-432-3p, miR-493-5p, miR-345-5p, miR-329a, miR-376c-5p, miR-331-5p, miR-25-3p, miR-2285aa, miR-2355-5p, miR-874-3p, miR-134-5p, miR-331-5p, miR-6740-5p, miR-2284k, miR-1197-3p, miR-1260b, miR-2284v, miR-23b-5p, miR-330-5p, miR-1343-5p, miR-486-5p, miR-129-1-3p, novel\_121, miR-134-5p, miR-758-5p, miR-505-5p, miR-1224-5p, miR-6517, novel\_127, miR-127-5p, miR-1a-2-5p, miR-664-3p, miR-2285b, miR-450c-5p, novel\_39, miR-2284y, miR-92b-3p, miR-450b-5p, miR-9-3p, miR-493-5p, miR-504, miR-378j, miR-221, miR-140-5p, miR-4443, miR-126b-5p, miR-7689-3p, miR-2319b, miR-2284g, miR-490-5p, miR-301a-5p, miR-2440, miR-101-3p, miR-218-5p, miR-423-5p, miR-361-3p, miR-2284j, miR-190b-5p, miR-363-3p, miR-101c, miR-362-3p, miR-323b, miR-301b-5p, miR-2284r, miR-329-3p, miR-455-3p, miR-147a, miR-1343-3p, miR-199b-3p, miR-323b-3p, miR-29b-1-5p, miR-8485, miR-2284b, miR-101b-3p, miR-345-5p, miR-129b-3p, miR-216b-5p, miR-32-5p, miR-504-5p, miR-129-5p, miR-4492, miR-190a-5p, miR-181c-5p, miR-122-5p, miR-3184-5p, miR-129-2-3p, miR-3074-5p, miR-361-5p, miR-34a-5p, miR-2284u, miR-664-5p, novel\_73, miR-193b-5p, miR-1247-5p, miR-212-5p, miR-18a-3p, miR-3653-3p, miR-345-3p, miR-324-3p, miR-500a-5p, miR-26a-5p, novel\_17, miR-2424, miR-376a-5p, miR-664b-3p, miR-195a-3p, miR-10a-3p, miR-135b-5p, miR-505-3p, miR-6516-3p, miR-9851-3p, miR-107, miR-21c, miR-18a-3p, miR-34b, miR-670-3p, miR-146b-3p, miR-199c, miR-502b, novel\_1, miR-92a-3p, miR-382-5p, miR-34c, miR-2428, miR-326-3p, miR-119a, miR-7975, miR-199b-5p, miR-7857-3p, miR-3596, miR-378g, miR-299b-3p, novel\_69, miR-669, miR-454-5p, miR-378b, miR-7977, miR-3964, miR-147-5p, miR-576-3p, miR-423-5p, miR-326-3p, miR-7705, miR-199b-5p, miR-219a-2-3p, miR-541-3p, miR-452-5p, novel\_101, miR-541, miR-134-3p, miR-1298-3p, miR-147a, miR-2459, novel\_4, novel\_78, miR-339-5p, miR-26b-3p, miR-378a-5p, miR-199b-5p, miR-224-5p, novel\_103, miR-326, miR-29b-1-5p, miR-365b-5p, miR-2411-3p, miR-3187-3p, miR-2310, miR-1388-3p, miR-23a-3p, miR-339b, miR-885-3p, miR-1814c, miR-23b, miR-6130, miR-3959-5p, novel\_32, miR-199a-5p, miR-221-5p, miR-2331-3p, miR-3068-3p, miR-141-3p, miR-1271, miR-4492, miR-2433, miR-219b-3p, miR-3969, miR-6525, miR-224-5p, miR-365a-5p, miR-122-5p, miR-3184-5p, miR-338-3p, miR-4510, miR-665-5p, miR-885-3p, miR-378d, miR-345-3p, miR-2408, miR-2904, miR-330-5p, miR-505-5p, miR-23b-3p, miR-23c, miR-214-5p, miR-299a-3p, novel\_79, miR-2898, miR-466i-5p, miR-221-5p, miR-299-3p, miR-200a-3p, miR-219-3p, miR-8117, miR-185-3p, miR-345-3p, miR-339a, miR-29b-1-5p, miR-200a, miR-199a-5p, miR-490-3p, miR-183-5p, miR-345-3p

miR-3074-5p, miR-129-2-3p, miR-214, miR-181c-5p, miR-66b, miR-487b-5p, novel\_74, miR-130b-5p, miR-874-5p, miR-4492, miR-2331-3p, miR-504-5p, miR-30c-1-3p, miR-296-3p, novel\_107, miR-2284s, miR-10a, miR-499b-3p, miR-377-3p, miR-15b-5p, miR-339b, miR-1827, miR-186-5p, miR-543-3p, miR-2285w, miR-329a-5p, miR-142a-3p, miR-181b-1-3p, miR-421-5p, miR-486-3p, miR-2424, novel\_17, miR-92a-1-5p, miR-324-3p, miR-18a-3p, miR-2284h-5p, miR-2366, miR-193b-5p, miR-33b-3p, miR-493-3p, miR-2284u, miR-34a-5p, miR-664-5p, miR-16-1-3p, miR-133a-3p, miR-2447, miR-2284j, miR-361-3p, novel\_82, miR-3968, miR-2319b, miR-4792, miR-2284g, miR-139-5p, miR-3596, miR-378g, miR-499a-3p, miR-4443, miR-378j, miR-504, miR-3963, miR-1983, miR-101b-3p, miR-1388-3p, miR-2284b, miR-431-5p, miR-199a-3p, miR-16b, miR-323b-3p, miR-487b-5p, miR-491-5p, miR-103a-2-5p, miR-214-3p, miR-199b-3p, novel\_78, miR-1343-3p, miR-181b-2-3p, miR-147a, miR-425-3p, miR-455-3p, miR-541, miR-329-3p, miR-2284r, miR-323b, miR-1a-3p, miR-1388-5p, miR-362-3p, miR-2284v, miR-16-5p, miR-1260b, miR-2284k, miR-125b-5p, miR-6740-5p, miR-592, miR-574-5p, miR-125a, miR-2355-5p, miR-329b, miR-329a, miR-876-3p, miR-1248, miR-3064-5p, miR-450b-5p, miR-3956-5p, novel\_39, miR-2284y, miR-205-5p, novel\_127, novel\_96, miR-429-3p, miR-6517, miR-2285ad, miR-431, novel\_79, miR-505-5p, miR-322-5p, miR-129-1-3p, miR-196a-5p, miR-23b-5p, miR-330-5p, miR-1343-5p, miR-335-5p, miR-29c-3p, miR-28c, miR-4324, miR-29a, miR-206, miR-6123, miR-421-5p, miR-329-5p, miR-3074-5p, miR-411b-3p, miR-181b-3p, miR-320c, miR-677, miR-1306, miR-412-3p, miR-2319a, miR-432-3p, miR-377-3p, miR-296-3p, miR-7-5p, miR-194a, miR-196b-5p, miR-483-3p, miR-103a-3p, miR-3955-5p, miR-31-5p, miR-339-5p, miR-134-3p, novel\_116, miR-411-5p, miR-542-3p, miR-7b-5p, miR-1843b-5p, miR-432, miR-197-

miR-376e-3p, miR-301a-3p, miR-15b-5p, miR-504-5p, miR-30c-1-3p, miR-2331-3p, miR-216b-3p, miR-296-3p, miR-543-3p, miR-625-5p, miR-1895, miR-186-5p, miR-450a-1-3p, miR-500a-3p, miR-3074-5p, miR-665-5p, miR-874-5p, miR-500, miR-454-3p, miR-130b-5p, miR-664a-5p, miR-665, miR-1247-5p, miR-328-3p, miR-106a, miR-33b-3p, miR-142-3p, miR-133a-3p, miR-16-1-3p, miR-218-1-3p, miR-34a-5p, miR-378i, miR-193b-5p, miR-217-5p, miR-378a-3p, miR-376a-5p, miR-376c-3p, miR-486-3p, miR-345-3p, novel\_17, miR-26a-5p, miR-618, miR-210-5p, miR-324-3p, miR-3601, miR-422a, miR-345-3p, miR-378g, miR-203-3p, miR-7689-3p, miR-2285u, miR-211-5p, miR-99b-5p, miR-504, miR-668-5p, miR-335-3p, miR-140-5p, miR-378j, miR-1306-3p, miR-361-3p, miR-1285-5p, miR-2447, miR-3956-3p, miR-9-5p, miR-3968, miR-499a-5p, novel\_82, miR-218-5p, miR-2440, miR-496-5p, miR-147a, miR-2459, miR-548w, miR-145b, miR-1839-5p, miR-541, miR-378d, miR-1388-3p, miR-487b-5p, miR-130b-3p, miR-199b-5p, miR-431-5p, miR-505, miR-106b-5p, miR-16b, miR-376c-3p, miR-574-5p, miR-874-3p, miR-2355-5p, miR-20b-5p, miR-1248, miR-93-5p, miR-376c-5p, miR-16-5p, miR-193a-5p, miR-2433, miR-9-5p, miR-505-5p, miR-322-5p, miR-450a-1-3p, miR-299a-3p, miR-6517, miR-412, miR-431, miR-155-5p, miR-1290, miR-330-5p, miR-23b-5p, miR-450b-5p, miR-2285b, miR-152-3p, miR-374c-3p, miR-299b-3p, miR-6535, miR-320c, novel\_68, miR-3074-5p, miR-378f, miR-376b-5p, miR-148a-3p, miR-3141, miR-150-5p, miR-1306, miR-216a-3p, miR-301b-3p, miR-199b-5p, miR-625-3p, miR-142b, miR-576-3p, miR-28c, miR-3535, miR-134-3p, miR-149-5p, miR-194-3p, miR-31-5p, miR-3955-5p, miR-103a-3p, miR-16b, miR-16-1-3p, miR-497-5p, miR-188-5p, miR-2284x, miR-450c-3p, miR-22-3p, miR-378a-5p, miR-296-3p, miR-3141, miR-365b-5p, miR-2411-3p, miR-194a, novel\_51, miR-544-3p, miR-27a-5p, miR-102-5p, miR-6130, novel\_25, miR-22-3p, miR-204-3p, miR-1248, miR-544a, miR-483-3p, miR-125b-2-3p, miR-3071-5p, miR-544b, miR-670-3p, miR-483-3p, miR-544-3p, miR-101-5p, miR-183-5p, miR-326, miR-4324, miR-665, miR-125b, miR-769-5p, miR-125b-5p, miR-324-3p, miR-760-3p, miR-125a-5p, novel\_42, novel\_101, miR-361-3p, miR-769-5p, miR-122-5p, miR-326-3p, miR-361-3p, miR-330-5p, miR-188-3p, miR-7134-5p, miR-1291, miR-125a, miR-2355-5p, miR-769, miR-3431, miR-496-5p, miR-532-3p

CHRNA

ENSOARGO(choliner)

RORA

ENSOARGO(RAR-rela)

PHC2

ENSOARGO(polyhome)



miR-195a-5p, miR-505-3p, miR-216b-3p, miR-655b-5p, miR-29a-3p, miR-6535, miR-320c, miR-4324, miR-3613, miR-15a, miR-20a-5p, miR-6402, miR-16a, miR-382-5p, miR-92a-3p, miR-29a, miR-656-5p, miR-625-3p, miR-147-5p, miR-502b, miR-6123, miR-135a-2-3p, miR-342-3p, miR-193b-3p, miR-1193, miR-29c-3p, miR-211, miR-708-3p, miR-22-3p, miR-450c-3p, miR-29b, miR-16b, miR-16-1-3p, miR-412-5p, miR-3431, miR-194-3p, miR-20b, miR-365b-5p, miR-32, miR-105-5p, miR-17-5p, novel\_51, miR-106a-5p, miR-124-5p, miR-125a-5p, miR-193a-3p, miR-101-5p, miR-628-5p, let-7a-2-3p, miR-345-5p, miR-488-3p, miR-93-5p, miR-23b, miR-17-5p, miR-3154, miR-320a, miR-767, miR-345-5p, miR-329b, let-7g-3p, miR-20b-5p, miR-1814c, miR-2355-5p, miR-125a, miR-25-3p, miR-29b-3p, miR-370-5p, miR-2332, miR-125b-5p, miR-767-5p, miR-204-5p, miR-374b-3p, miR-28a-3p, miR-16-5p, miR-133a-3p, miR-93, miR-374a-3p, miR-365a-5p, miR-3578, miR-1290, miR-29d-3p, miR-23b-5p, miR-105-2, let-7a-2-3p, miR-2285ad, miR-322-5p, miR-302a-5p, miR-1271-5p, miR-450a-1-3p, novel\_121, miR-214-5p, miR-2285af, miR-219-3p, miR-30f, miR-28-3p, miR-92a-3p, miR-30a-3p, miR-29b-2-5p, miR-92b-3p, miR-2284a, miR-129b-5p, miR-96-5p, novel\_94, miR-541-5p, miR-2285u, miR-126b-5p, miR-211-5p, miR-3596, miR-25, miR-203-3p, miR-2285n, miR-218-5p, miR-101-3p, miR-2285y, miR-107-5p, miR-3968, miR-628-3p, miR-374a-3p, miR-2284q, miR-363-3p, miR-877-3p, miR-7705, miR-219a-2-3p, miR-299a-5p, miR-2426, miR-101c, miR-105-1, miR-151a-3p, miR-153, miR-421, miR-320b, miR-342, miR-505, miR-106b-5p, miR-16b, miR-153-3p, miR-103a-2-5p, miR-1388-3p, miR-424-5p, miR-101b-3p, miR-106a-5p, miR-23a-3p, miR-193a, miR-3187-3p, miR-2310, miR-21a-3p, miR-450a-1-3p, let-7f-1-3p, miR-3613-5p, let-7g-3p, miR-133b-3p, miR-345-5p, miR-625-5p, miR-543-3p, miR-32-5p, miR-370-5p, miR-6130, miR-193b-3p, miR-22-3p, miR-15b-5p, miR-30a-

miR-376c-3p, miR-223-5p, miR-324-5p, miR-25-3p, miR-370-3p, miR-7144-5p, let-7g-3p, miR-10b-3p, miR-767, miR-3154, miR-23b, miR-301, miR-30e-5p, miR-374a-3p, miR-1260b, miR-133a-3p, miR-103b, miR-16-5p, miR-1306-5p, miR-204-5p, miR-767-5p, miR-29b-3p, miR-483-3p, miR-6516-5p, miR-322-5p, miR-9-5p, miR-302a-5p, miR-431, miR-1224-5p, miR-6517, miR-2285ad, miR-299a-3p, let-7a-2-3p, miR-105-2, miR-30c, miR-582-3p, miR-501-3p, miR-330-5p, miR-30a-5p, miR-1343-5p, miR-29d-3p, miR-345-3p, miR-3591-5p, miR-29a-5p, miR-450b-5p, miR-92b-3p, novel\_127, miR-92a-3p, miR-107, miR-125a-3p, miR-2285af, miR-1260a, miR-299b-3p, miR-411b-3p, miR-29a-3p, miR-2404, miR-7-1-3p, miR-135b-5p, miR-195a-5p, miR-107, miR-2284e, miR-1291, miR-18a-3p, miR-150-5p, miR-1306, miR-326-3p, novel\_27, miR-3959-3p, miR-24-3p, miR-211, miR-29c-3p, miR-342-3p, novel\_120, miR-29a, miR-92a-3p, miR-6119-3p, miR-16a, miR-6529b, miR-4324, miR-15a, miR-103, miR-149-5p, miR-503-5p, miR-432-5p, miR-103a-3p, miR-340-3p, miR-27b-3p, miR-497-5p, miR-1260b, miR-29b, miR-380-3p, miR-16b, miR-145a-5p, miR-194-5p, miR-374b-3p, miR-431-3p, miR-1843b-5p, miR-432, let-7a-2-3p, miR-296-3p, miR-101-5p, miR-668-3p, miR-130b-5p, miR-1343-5p, miR-483-3p, miR-194a, novel\_51, miR-2411-3p, miR-32, miR-105-5p, miR-377-3p, miR-296-3p, miR-503-5p, miR-15b-5p, novel\_32, miR-6516, miR-377-3p, miR-548c-3p, miR-32-5p, miR-2331-3p, novel\_99, miR-30f, miR-133b-3p, miR-411, miR-30d-5p, miR-145a-3p, miR-130b-5p, miR-129-5p, miR-424-5p, miR-487b-5p, miR-151-3p, miR-324-3p, miR-2284h-5p, miR-199a-3p, miR-532-3p, miR-616-3p, miR-15a-5p, miR-222-5p, miR-23c, miR-23b-3p, miR-383-5p, miR-3600, miR-18a-3p, miR-548e-3p, miR-142-3p, miR-1197-5p, miR-1434-5p, miR-30c-5p, miR-380-3p, miR-376c-3p, miR-125b-2-3p, miR-376a-5p, miR-2285w, miR-503-5p, miR-299a-3p, miR-30d, miR-345-

miR-654-3p, miR-345-5p, miR-6240, miR-130b-5p, miR-380-5p, miR-196b-5p, miR-124-5p, miR-125a-5p, miR-377-3p, miR-7-5p, miR-365b-5p, miR-330-3p, miR-134-3p, miR-544b, miR-103, miR-194-3p, miR-103a-3p, miR-26b-3p, miR-487b-3p, miR-665, miR-1260b, miR-138, miR-30b-3p, miR-7b-5p, miR-223-3p, miR-873a-5p, miR-3071-5p, miR-2428, miR-342-3p, miR-1193, miR-2285x, miR-128-1-5p, miR-147-5p, miR-656-5p, miR-4324, miR-670-3p, miR-411b-3p, miR-299b-3p, miR-2404, novel\_68, miR-107, miR-1291, miR-6395, miR-6516-3p, miR-18b, miR-216a-3p, miR-18a-3p, miR-1306, miR-380-5p, miR-192-3p, miR-450a-2-3p, novel\_127, miR-543-5p, miR-107, miR-8117, miR-125a-3p, miR-1260a, miR-205-5p, miR-758-5p, miR-6516-5p, miR-505-5p, novel\_121, miR-299a-3p, miR-222, miR-18b-5p, miR-128-3p, miR-1290, miR-196a-5p, miR-23b-5p, miR-1260b, miR-365a-5p, miR-193a-5p, miR-138-5p, miR-5100, miR-370-5p, miR-410-5p, miR-2433, novel\_63, miR-125b-5p, miR-769, miR-874-3p, miR-125a, miR-2285aa, miR-345-5p, miR-10b-3p, miR-876-3p, miR-23a-5p, miR-2448-3p, miR-18a, miR-3154, miR-3187-3p, miR-193a, miR-494-3p, miR-1388-3p, miR-25-5p, novel\_115, miR-1306-5p, miR-342, miR-199a-3p, miR-147a, miR-216a-3p, miR-221-3p, novel\_4, novel\_78, miR-330-3p, miR-1343-3p, miR-2300a-5p, miR-222-5p, miR-299a-5p, miR-544a, miR-101a-5p, miR-3120-5p, miR-21b, miR-2284r, miR-30b-3p, miR-361-3p, miR-877-3p, miR-8095, miR-32-3p, miR-2447, miR-6527, miR-490-5p, miR-7134-3p, miR-769-5p, miR-378g, miR-4443, miR-4792, miR-541-5p, miR-499b-5p, miR-504, miR-335-3p, miR-221, miR-125b-2-3p, miR-376a-5p, miR-421-5p, miR-143-3p, miR-299-3p, miR-1277-5p, miR-125b, miR-222-5p, miR-328-3p, novel\_83, miR-199a-3p, miR-18a-3p, miR-378d, miR-2300b-3p, miR-2904, miR-769-5p, miR-6525, miR-6134, miR-4510, miR-665-5p, miR-2330-3p, miR-6516-3p, miR-664a, miR-130b-5p, miR-6123, miR-576-3p, novel\_82, miR-125b-5p, miR-19b-1-5p, miR-1285-5p, miR-2447, miR-1271, miR-96-5p, miR-485-5p, miR-146b-5p, miR-361-3p, miR-489, miR-299b-3p, miR-204-3p, miR-874-3p, miR-2331-3p, miR-125a, miR-370-3p, miR-299-3p, miR-125a-5p, miR-146b, miR-30b-3p, miR-146a, miR-7-5p, miR-125b, miR-29b-1-5p, miR-29b-1-5p, miR-146a-5p, miR-628-5p, miR-30b-3p, miR-133a-3p, miR-7b-5p, miR-6529a, miR-19b-2-5p, miR-1193, miR-30b-3p, miR-412-3p, miR-185-5p, miR-1271-5p, miR-3431, miR-412-5p, miR-532-3p, miR-9788-3p, miR-1343-3p, miR-299a-3p, miR-412, miR-9-5p, miR-6130, miR-133c, miR-380-5p, miR-218-1-3p, miR-2448-3p, miR-148b-5p, miR-380-5p, miR-380-5p, miR-4510, miR-9-5p, miR-17-3p, miR-758-5p, miR-17-3p, miR-17-3p, miR-665, miR-2331-5p

IL36RN

ENSOARGO(interleu

GPRC5A

ENSOARGO(G protei

RNF111

ENSOARGO(ring fin

miR-30f, miR-200c, miR-92a-3p, novel\_96, miR-181b-5p, miR-200c-3p, miR-450a-2-3p, miR-2385-3p, miR-30a-3p, miR-450c-5p, miR-1271-3p, miR-192-3p, miR-1957a, miR-199a-5p, miR-376c-5p, miR-376b-5p, miR-92b-3p, miR-1343-5p, miR-1290, miR-196a-5p, miR-3591-5p, miR-105-2, miR-200b-3p, miR-6517, miR-429-3p, miR-222, miR-483-3p, miR-378h, miR-2411-5p, miR-100-3p, miR-410-5p, miR-191-5p, miR-486b-3p, miR-331-5p, miR-103b, miR-145-3p, miR-378c, miR-323-3p, miR-376c-5p, miR-3154, miR-331-5p, miR-488-3p, miR-376c-5p, miR-7144-5p, novel\_48, miR-329a, miR-345-5p, miR-10b-3p, miR-2355-5p, miR-542-5p, miR-3957-5p, miR-3957, miR-199a-5p, miR-25-3p, miR-331-5p, miR-300-3p, novel\_51, miR-190a, miR-32, miR-105-5p, miR-224-5p, miR-466f-3p, miR-1343-5p, miR-124-5p, miR-483-3p, miR-196b-5p, miR-378a-5p, miR-345-5p, miR-503-3p, miR-539-3p, miR-3071-5p, miR-181a-5p, miR-1434-3p, miR-432, miR-266b-3p, miR-2355-3p, miR-3431, miR-3535, miR-432-5p, miR-576-3p, miR-502-5p, miR-147-5p, novel\_1, miR-92a-3p, novel\_120, miR-2285m, miR-199b-5p, miR-24-3p, miR-371b-3p, miR-150-5p, miR-3970, miR-2387, miR-376b-5p, miR-378f, miR-6395, miR-6516-3p, miR-1291, novel\_68, miR-670-3p, miR-185-3p, miR-422a, miR-216a-5p, miR-219b-5p, miR-2285p, miR-466i-5p, miR-345-3p, miR-2411, miR-2424, miR-486-3p, miR-125b-2-3p, miR-130a-5p, miR-1197-5p, miR-378a-3p, miR-362-3p, miR-193b-5p, miR-191, miR-378i, miR-33b-3p, miR-485-3p, miR-3960, miR-328-3p, miR-200b, miR-487a-3p, miR-30a-3p, miR-30e-3p, miR-222-3p, miR-15b-3p, miR-190a-5p, miR-129-5p, miR-208b-5p, miR-2330-3p, miR-378c, miR-3184-5p, miR-224-5p, miR-6525, miR-1827, miR-582-5p, miR-543-3p, miR-345-5p, miR-378a-3p, miR-32-5p, miR-216b-5p, miR-582-5p, miR-362-3p, miR-103a-2-5p, miR-199b-5p, miR-491-5p, miR-494-3p, miR-1388-3p, miR-1522, miR-8185, miR-278d, miR-2962, miR-1701, miR-2281r, miR-412-5p, miR-432-5p, novel\_121, miR-412, miR-455-5p, miR-542-3p, miR-1434-3p, miR-432, miR-1197-5p, miR-412-3p, miR-1343-5p, miR-2478, miR-3187-3p, miR-195a-3p, miR-450a-2-3p, miR-1343-5p, miR-219-3p, miR-664-3p, miR-455-5p, miR-3082-5p, miR-2483-3p, miR-2284s, miR-664b, miR-211-5p, miR-2355-5p, miR-1248, miR-877-3p, miR-9851-3p, miR-503-3p, miR-211, miR-219a-2-3p, miR-145-3p, miR-664a, miR-204-5p, miR-874-5p, miR-101-3p, miR-2285j, novel\_63, miR-4324, miR-219b-3p

CDKN1B

ENSOARGO(cyclin-d

ALDH1A2

ENSOARGO(aldehyde

miR-103a-2-5p, miR-214-3p, novel\_103, miR-199a-3p, miR-106b-5p, miR-758-3p, miR-101b-3p, miR-106a-5p, miR-1388-3p, miR-2284b, miR-33a-5p, miR-450b-5p, miR-101a-5p, miR-3120-5p, miR-21b, miR-2284aa, miR-6529a, miR-758-3p, miR-412-3p, miR-142-5p, miR-376b-3p, miR-2459, miR-1185-3p, miR-421, miR-126a-5p, miR-455-3p, miR-216a-3p, novel\_4, miR-1343-3p, miR-27a-3p, miR-222-5p, miR-5010-3p, miR-2285t, miR-107-5p, miR-769-5p, miR-877-3p, miR-219a-2-3p, miR-219a-5p, miR-544-5p, miR-376a-3p, miR-140-5p, miR-129b-5p, miR-3082-5p, miR-499a-3p, miR-7857-3p, miR-3596, miR-1185-2-3p, miR-376d, miR-27a-3p, miR-20a-3p, miR-2284g, miR-139-5p, miR-499b-5p, miR-106a, miR-299-3p, miR-21-3p, miR-1277-5p, miR-210-5p, miR-92a-1-5p, miR-216a-5p, miR-376a-5p, miR-216c-5p, miR-20a, miR-33b-3p, miR-19b-3p, miR-493-3p, miR-378d, miR-2284u, miR-16-1-3p, miR-218-1-3p, miR-2300b-3p, miR-215-5p, miR-193b-5p, miR-140-3p, miR-5703, miR-222-5p, miR-487a-3p, miR-199a-3p, miR-106a, miR-505-3p, miR-380-5p, miR-6516-3p, miR-450b-3p, miR-129-5p, miR-29b-2-5p, miR-219b-3p, miR-769-5p, miR-142a-5p, miR-338-3p, miR-6134, miR-145a-3p, miR-3074-5p, miR-214, miR-2330-3p, miR-582-5p, novel\_99, miR-186-5p, miR-450a-1-3p, miR-21a-3p, miR-139-5p, miR-216b-5p, miR-193b-3p, miR-192-5p, miR-582-5p, miR-499b-3p, miR-877-5p, novel\_32, miR-545-3p, miR-296-3p, miR-216b-3p, miR-21-3p, miR-193a-3p, miR-1343-5p, miR-17-5p, miR-106a-5p, miR-654-3p, miR-16-1-3p, miR-219a-1-3p, miR-27b-3p, miR-188-5p, miR-1434-3p, miR-1285, miR-873a-5p, novel\_23, miR-197-3p, miR-450c-3p, miR-412-5p, miR-20b, novel\_116, miR-133b-5p, miR-31-5p, miR-6119-3p, miR-22-5p, miR-421-5p, miR-28c, miR-142b, miR-133a-5p, miR-20a-5p, novel\_87, miR-33a-3p, miR-24-3p, miR-2284w, novel\_27, miR-135a-2-3p, miR-758-5p, miR-193b-3p, miR-19a-3p, miR-505-3p, miR-7075, miR-376b-3p, miR-3591-3p, miR-374c-3p, miR-200b-

miR-190a-3p, miR-20b-5p, miR-34b-5p, miR-93-5p, miR-17-5p, miR-320a, miR-488-3p, miR-503-3p, miR-223-5p, miR-300-3p, miR-25-3p, miR-769, miR-2355-5p, miR-141-3p, miR-1271, miR-615-5p, miR-125a, miR-138-5p, miR-331-3p, miR-125b-5p, miR-135a-5p, miR-5100, miR-93, miR-1260b, miR-1197-3p, miR-128-3p, miR-1343-5p, miR-345-3p, miR-3578, miR-1290, miR-129-1-3p, miR-24-2-5p, miR-2411-5p, miR-7641, miR-6517, miR-107, novel\_96, miR-200a-3p, miR-92a-3p, miR-17-3p, miR-30c-2-3p, miR-1260a, miR-664-3p, miR-92b-3p, miR-29b-2-5p, miR-30a-3p, miR-3064-5p, miR-2403, miR-146b-5p, miR-2319a, miR-135b-5p, miR-6395, miR-450b-3p, miR-412-3p, miR-107, miR-150-5p, miR-216a-3p, miR-320c, miR-323a-5p, miR-2404, miR-146b-3p, miR-320b, miR-3120-3p, miR-22-5p, miR-656-5p, miR-502b, miR-92a-3p, miR-128-1-5p, miR-20a-5p, miR-576-3p, novel\_27, miR-24-3p, miR-3959-3p, miR-323c, miR-17-3p, novel\_101, miR-2285x, novel\_120, miR-135a-2-3p, miR-27b-3p, miR-30b-3p, miR-138, miR-219a-1-3p, miR-16-1-3p, miR-1260b, miR-145a-5p, miR-432, miR-7b-5p, miR-542-3p, miR-223-3p, miR-103, miR-20b, miR-544b, miR-432-5p, miR-412-5p, miR-185-5p, miR-3431, miR-665, miR-26b-3p, miR-31-5p, miR-187-3p, miR-103a-3p, miR-133b-5p, miR-125a-5p, miR-660, miR-1343-5p, miR-124-5p, miR-32, miR-330-3p, miR-17-5p, miR-106a-5p, miR-2411-3p, miR-7-5p, miR-377-3p, miR-146a, miR-539-3p, miR-345-5p, miR-654-3p, miR-432-3p, miR-432-3p, miR-6240, miR-1827, let-7g-3p, miR-345-5p, miR-433-3p, miR-544-3p, miR-377-3p, miR-323-5p, miR-139-5p, miR-532-5p, miR-30c-1-3p, miR-32-5p, miR-221-5p, miR-660-5p, miR-669a-3p, miR-17-3p, miR-664a, miR-30a-3p, miR-324-3p, miR-151-3p, miR-29b-2-5p, miR-338-5p, miR-665, miR-320e, miR-30e-3p, miR-769-5p, miR-6525, miR-346, miR-3074-2-3p, miR-539-5p, miR-129-2-3p, miR-664-5p, miR-16-1-3p, miR-4429, miR-2904, novel\_133, miR-199a-3p, miR-3065-3p, miR-378d, miR-452-3p, miR-143-5p, miR-3065-3p, miR-301b-5p, miR-10b, miR-7b-5p, miR-6239, miR-29b, miR-544a, miR-3432b, miR-339-5p, novel\_4, miR-103a-3p, miR-133b-5p, miR-221-3p, miR-103, miR-544b, miR-153, miR-3431, miR-1298-3p, miR-342, miR-7-5p, miR-377-3p, miR-431-5p, miR-153-3p, miR-193a-3p, miR-130b-5p, miR-8485, miR-2285r, miR-3065-5p, miR-221, miR-9851-3p, miR-299b-5p, miR-136-5p, miR-107, miR-504, miR-655-5p, miR-2285u, miR-7-1-3p, miR-10a-5p, miR-20a-3p, miR-452-3p, miR-25, miR-29a-3p, miR-371a-5p, miR-769-5p, miR-301a-5p, miR-2285n, miR-2440, miR-490-5p, miR-29a, miR-193b-3p, miR-29c-3p, miR-135a-2-3p, miR-342-3p, miR-219b-3p, miR-885-5p, novel\_27, miR-29d-3p, miR-2300b-3p, miR-378d, miR-10a-5p, miR-582-3p, miR-300, novel\_79, miR-3600, miR-1224-5p, miR-431, miR-30d-3p, miR-222, miR-2284h-5p, miR-486-5p, miR-340-5p, miR-339a, miR-2285af, novel\_17, miR-30b-3p, miR-107, miR-221-5p, miR-30a-3p, miR-3529-3p, miR-2285w, miR-2285b, miR-3154, miR-381-3p, miR-299, novel\_99, miR-339b, miR-504-5p, miR-221-5p, miR-133c, miR-10a, miR-544-3p, miR-376e-3p, miR-377-3p, miR-193b-3p, miR-769, miR-6130, miR-30a-3p, miR-29b-3p, miR-222-3p, miR-30e-3p, miR-2332, miR-487a-5p, miR-130b-5p, miR-4510, miR-769-5p, miR-10b-5p

miR-29b-1-5p, miR-330-3p, miR-124-5p, miR-3085-3p, miR-6240, miR-378d, miR-1434-3p, miR-2113, miR-6529a, miR-378b, miR-378c, miR-1388-5p, miR-2284x, miR-330-3p, miR-5010-3p, miR-185-5p, miR-149-5p, miR-9788-3p, miR-218-5p, miR-3964, miR-1193, miR-2285x, miR-6527, miR-211, miR-3065-5p, miR-410-5p, miR-378f, miR-452-3p, miR-3064-5p, miR-211-5p, miR-541-5p, miR-2483-3p, miR-499a-3p, miR-7857-3p, miR-378e, miR-196a-3p, miR-422a, miR-450a-2-3p, miR-4286, miR-181a-2-3p, miR-3064-5p, miR-376c-3p, miR-29b-1-5p, miR-3956-5p, miR-486-3p, miR-378i, miR-1197-5p, miR-378a-3p, miR-155-5p, miR-380-5p, miR-6516-5p, miR-758-5p, miR-378h, novel\_83, miR-370-5p, miR-100-3p, miR-155-5p, miR-486b-3p, miR-204-5p, miR-378c, miR-433-5p, miR-3958-5p, miR-1197-3p, miR-6525, miR-378c, miR-10b-3p, miR-582-5p, miR-378a-3p, miR-370-5p, novel\_107, miR-3965, miR-582-5p, miR-376e-3p, miR-499b-3p, miR-6516, miR-331-5p, miR-376c-3p, miR-155-5p, miR-21a-3p, miR-133b-3p, novel\_99, miR-582-5p, miR-660-5p, miR-32-3p, miR-3065-3p, miR-21-3p, miR-139-5p, miR-193b-3p, miR-544-3p, miR-204-3p, novel\_32, miR-29b-2-5p, miR-320e, miR-17-3p, miR-664a, miR-208b-5p, miR-424-5p, miR-145a-3p, miR-539-5p, miR-338-3p, miR-376a-5p, miR-5703, miR-2904, miR-4429, miR-378d, miR-548e-3p, miR-15a-5p, miR-383-5p, miR-196a-3p, miR-125b, miR-466i-5p, miR-320d, miR-21-3p, miR-30b-3p, miR-183-5p, miR-216c-5p, miR-130a-5p, miR-146a-5p, miR-199b-5p, miR-361-3p, miR-129b-5p, miR-877-3p, novel\_94, miR-20a-3p, miR-3064-5p, miR-7977, miR-499b-5p, miR-541-5p, miR-489, miR-454-5p, miR-107-5p, miR-769-5p, miR-374a-3p, miR-32-3p, miR-181d-5p, miR-1296-5p, miR-362-5p, miR-8095, miR-125b-2-3p, miR-3962, miR-30b-3p, miR-412-3p, miR-544a, miR-2426, miR-3120-5p, miR-16-2-3p, miR-2300a-5p, miR-409b, miR-5010-3p, miR-9788-3p, miR-500-5p, miR-342, miR-320b, miR-2957, miR-3085-3p, miR-424-5p, miR-33a-5p, miR-3154, miR-362-5p, miR-320a, miR-485-5p, miR-671-5p, miR-190a-3p, miR-7144-5p, miR-141-3p, miR-370-3p, miR-769, miR-199a-5p, miR-5100, miR-1306-3p, miR-29b-3p, miR-410-5p, miR-409-3p, miR-135a-5p, miR-144, miR-331-3p, miR-767-5p, miR-138-5p, miR-204-5p, miR-374b-3p, miR-486b-3p, miR-133a-3p, miR-6128, miR-374a-3p, miR-500b-5p, miR-145-3p, miR-3578, miR-29d-3p, miR-411-3p, miR-483-3p, miR-200c, miR-217, miR-339a, miR-181b-5p, miR-200c-3p, miR-450a-2-3p, miR-17-3p, miR-4286, miR-29b-2-5p, miR-2385-3p, miR-3065-3p, miR-199a-5p, miR-18a-3p, miR-450b-3p, miR-135b-5p, miR-195a-5p, miR-320b, miR-670-3p, miR-29a-3p, miR-133a-5p, miR-15a, miR-16a, miR-147-5p, miR-203b-5p, miR-342-3p, miR-495-3p, miR-17-3p, miR-211, miR-2428, novel\_27, miR-1285, miR-181a-5p, miR-1434-3p, miR-219a-1-3p, miR-138, miR-30b-3p, miR-20b, miR-2355-3p, miR-544b, miR-2285l, miR-124-5p, miR-125a-

miR-345-3p, miR-29b-2-5p, miR-3529-3p, miR-503-5p, miR-183-5p, miR-10a-3p, miR-2284a, miR-486-3p, miR-200a, miR-3065-3p, miR-2284y, miR-148b-5p, miR-500a-5p, miR-664-3p, miR-2285p, miR-210-5p, miR-21-3p, miR-1277-5p, miR-6536, miR-181b-5p, miR-2284m, miR-532-3p, miR-15a-5p, miR-23b-3p, miR-322-5p, miR-302a-5p, miR-188-3p, miR-2284u, miR-148a-5p, miR-155-5p, novel\_73, miR-103b, miR-16-5p, miR-3607-3p, miR-2284v, miR-145a-3p, miR-539-5p, let-7e-3p, miR-181c-5p, miR-346, miR-6525, miR-3969, miR-29b-2-5p, miR-2332, miR-135a-1-3p, miR-2284k, miR-486b-3p, miR-424-5p, miR-874-5p, miR-155-5p, miR-182-5p, miR-3065-3p, miR-2355-5p, miR-140-5p, miR-155-5p, miR-15b-5p, miR-23b, miR-301, miR-21a-3p, miR-1827, miR-2318, miR-10a-3p, let-7g-3p, miR-2284b, let-7c-3p, miR-23a-3p, miR-494-3p, miR-424-5p, miR-491-3p, miR-193a, miR-16b, miR-182-5p, miR-2957, miR-503-5p, miR-452-5p, miR-145b, novel\_4, miR-2300a-5p, miR-133b-5p, miR-148b-5p, miR-455-3p, miR-3431, miR-539-5p, miR-134-3p, miR-503-5p, miR-2284d, miR-145a-5p, miR-181a-5p, miR-6529a, miR-296-5p, miR-2284x, miR-497-5p, miR-16b, miR-2284ab, miR-181d-5p, miR-219a-5p, miR-2285x, miR-2284j, miR-154a, miR-7705, miR-877-3p, miR-16a, miR-15a, miR-2285n, miR-147-5p, miR-490-5p, miR-3964, novel\_1, miR-655-5p, miR-378b, miR-2284g, miR-664b, miR-4443, miR-411b-3p, miR-2483-3p, miR-378g, miR-3065-5p, miR-195a-5p, miR-1291, miR-1839-5p, novel\_94, miR-3970, miR-200a-5p, miR-125b-2-3p, miR-18a-3p, miR-2284h-5p, miR-129-1-3p, miR-877-5p, miR-3955-5p, miR-18a-3p, miR-221-5p, miR-221-5p, novel\_127, miR-450a-2-3p, miR-3968, miR-1185-5p, miR-2428, miR-6525, miR-129-2-3p, miR-2285w

LRP6 ENSOARG0C low dens

FNDC5 ENSOARG0C fibronec



RFX7 ENSOARGO( regulato

miR-541-5p, miR-20a-3p, miR-376d, miR-489, miR-378j, miR-199b-5p, miR-361-3p, novel\_94, miR-376a-3p, miR-96-5p, miR-2285f, miR-541-3p, miR-3956-3p, novel\_60, miR-8095, novel\_111, miR-218-5p, miR-2285n, miR-1843a-3p, miR-499a-5p, miR-4726-5p, miR-330-3p, miR-199b-3p, miR-2285e, miR-421, miR-216a-3p, miR-147a, miR-376b-3p, miR-30b-3p, miR-541, miR-33a-5p, miR-23a-3p, miR-1839-3p, miR-3187-3p, miR-30c-1-3p, miR-5126, miR-342, miR-214-3p, miR-199b-5p, miR-3085-3p, miR-552-3p, miR-660-5p, miR-545-3p, miR-30c-1-3p, miR-192-5p, miR-433-3p, miR-27b-5p, miR-2285c, miR-450a-1-3p, miR-21a-3p, miR-2312, miR-214, miR-1271, miR-3074-5p, miR-29b-2-5p, miR-665, miR-4492, miR-17-3p, miR-487b-5p, miR-450b-3p, miR-548e-3p, miR-23c, miR-7859, miR-23b-3p, miR-1193, miR-215-5p, miR-2366, miR-143-3p, miR-2432, miR-185-3p, miR-21-3p, miR-299-3p, miR-2484, miR-466i-5p, miR-3074-5p, miR-669, miR-299b-3p, miR-29a-3p, miR-376b-3p, miR-3065-5p, miR-2387, miR-2285ab, miR-376a-2-5p, novel\_101, miR-17-3p, miR-29c-3p, miR-1839-3p, miR-136-3p, miR-342-3p, miR-199b-5p, miR-3959-3p, novel\_87, miR-28c, miR-6529b, miR-576-3p, miR-502-5p, miR-4324, miR-199c, miR-29a, miR-185-5p, miR-2285g, miR-450c-3p, miR-542-3p, miR-1843b-5p, miR-653, miR-4508, miR-29b, miR-30b-3p, miR-628-5p, miR-382, miR-6240, miR-654-3p, miR-330-3p, miR-197-5p, miR-126a-3p, miR-452-5p, miR-660, miR-124-5p, miR-215-5p, miR-370-3p, miR-2355-5p, miR-574-5p, miR-199a-5p, miR-23b, miR-329b, miR-6128, miR-193a-5p, miR-145-3p, miR-6740-5p, miR-100-3p, miR-29b-3p, miR-551b-3p, miR-126b-3p, novel\_9, miR-376a-5p, miR-6517, miR-299a-3p, miR-450a-1-3p, miR-1271-5p, miR-2427, miR-29d-3p, miR-4286, miR-29b-2-5p, miR-2285b, miR-199a-5p, miR-28b, miR-30c-2-3p, miR-6119-5p, miR-376b-3p, miR-17-3p

miR-33a-5p, miR-3187-3p, miR-27a-3p, miR-5010-3p, miR-9788-3p, miR-221-3p, miR-10b, miR-484, miR-30b-3p, miR-2426, miR-544a, miR-3120-5p, miR-212-3p, miR-3059-5p, miR-452-5p, miR-154a, miR-219a-2-3p, miR-502-3p, miR-107-5p, miR-371a-5p, miR-450a-5p, miR-2284q, miR-20a-3p, miR-452-3p, miR-664b, miR-7977, miR-489, miR-27a-3p, miR-361-3p, miR-129b-5p, novel\_94, miR-130a-5p, miR-125b-2-3p, miR-146a-5p, miR-125b, miR-760-3p, miR-505-3p, miR-485-3p, miR-200b, miR-487a-3p, miR-199a-3p, miR-616-3p, miR-1193, miR-5703, miR-206-3p, miR-10b-5p, miR-338-3p, miR-222-3p, miR-29b-2-5p, miR-338-5p, miR-19b-1-5p, miR-17-3p, miR-664a, miR-496-3p, miR-532-5p, miR-182-5p, miR-21-3p, miR-370-5p, miR-544-3p, miR-6516, miR-22-3p, miR-204-3p, novel\_99, miR-582-5p, miR-130b-5p, miR-654-3p, miR-345-5p, miR-539-3p, miR-224-5p, miR-455-5p, miR-197-5p, miR-125a-5p, miR-377-5p, miR-26b-3p, miR-185-5p, miR-432-5p, miR-544b, miR-2355-3p, miR-653, miR-374b-3p, miR-145a-5p, miR-219a-1-3p, miR-30b-3p, miR-7862, miR-455-5p, novel\_101, miR-1193, miR-17-3p, miR-24-3p, miR-211, miR-2428, miR-6402, novel\_1, miR-199c, miR-22-5p, miR-656-5p, miR-10a-5p, miR-655-5p, miR-2404, miR-2387, miR-378b, miR-1291, miR-450b-3p, miR-505-3p, miR-135b-5p, miR-4286, miR-1, miR-29b-2-5p, miR-2478, miR-2284a, miR-200c, miR-2285af, miR-200c-3p, miR-17-3p, miR-222, miR-7641, miR-6516-5p, miR-302a-5p, miR-24-2-5p, miR-345-3p, miR-496, miR-10a-5p, miR-128-3p, miR-200b-3p, miR-103b, miR-6128, miR-370-5p, miR-551b-3p, miR-1-5p, miR-409-3p, miR-3969, miR-135a-5p, miR-767-5p, miR-486b-3p, miR-204-5p, miR-3154, miR-10b-3p, miR-485-5p, miR-671-5p, miR-1814c, miR-7144-5p, miR-1388-3p, miR-2284b, miR-23a-3p, miR-1b-5p, miR-2310, miR-431-5p, miR-199a-3p, miR-182-5p, miR-103a-2-5p, miR-146b, miR-153-3p, miR-100b-3p, miR-548w, miR-181b-2-3p, miR-145b, miR-

miR-758-3p, miR-484, miR-378b, miR-541, miR-143-5p, miR-21b, miR-378c, miR-1388-5p, miR-2426, miR-2300a-5p, miR-9788-3p, miR-455-3p, miR-1185-3p, miR-421, miR-2285e, miR-142-3p, miR-16b, miR-320b, miR-326, miR-146b, miR-3955-3p, miR-33a-5p, miR-424-5p, miR-382-3p, miR-193a, miR-758-3p, miR-30c-1-3p, miR-378d, miR-129b-5p, miR-877-3p, novel\_94, miR-9-3p, miR-7977, miR-139-5p, miR-664b, miR-2319b, miR-20a-3p, miR-203-3p, miR-1185-2-3p, miR-378e, miR-378g, miR-3082-5p, miR-382-3p, miR-2440, miR-374a-3p, miR-3968, miR-450a-5p, miR-194b-5p, novel\_60, miR-2447, miR-541-3p, miR-3956-3p, miR-9-3p, miR-219a-2-3p, miR-2904, miR-1434-5p, miR-378a-3p, miR-1193, miR-5703, miR-30c-5p, miR-378i, miR-2366, miR-16-1-3p, miR-33b-3p, miR-4429, miR-222-5p, miR-148b-3p, miR-15a-5p, miR-200b, miR-216a-5p, miR-345-3p, miR-422a, miR-30d, miR-1277-5p, miR-3653-3p, miR-21-3p, miR-320d, miR-146a-5p, miR-130a-5p, miR-142a-3p, miR-129b-3p, miR-30d-5p, miR-21a-3p, miR-2285c, miR-186-5p, miR-345-5p, miR-339b, miR-30c-1-3p, miR-378a-3p, miR-204-3p, miR-15b-5p, miR-377-3p, miR-139-5p, miR-219b-3p, miR-129-5p, miR-424-5p, miR-17-3p, miR-378c, miR-3184-3p, miR-224-5p, miR-3071-5p, miR-194-5p, miR-374b-3p, miR-1434-3p, miR-497-5p, miR-2889, miR-16b, miR-16-1-3p, miR-339-5p, miR-31-5p, miR-187-3p, miR-103a-3p, miR-411-5p, miR-6238, miR-103, miR-2285g, miR-3431, miR-134-3p, miR-197-5p, miR-2411-3p, miR-194a, miR-224-5p, miR-146a, miR-377-3p, miR-124-5p, miR-382, miR-345-5p, miR-654-3p, miR-432-3p, miR-22841, miR-3065-5p, miR-148a-3p, miR-146b-5p, miR-6516-3p, miR-195a-5p, miR-378f, miR-107, miR-3120-3p, miR-378b, miR-320c, miR-374c-3p, miR-16a, novel\_87, miR-15a, miR-133a-5p, miR-421-5p, miR-656-5p, miR-22-5p, miR-6119-3p, novel\_1, miR-3957-3p, miR-17-3p, novel\_27, miR-326-3p, miR-2428, miR-2284w, miR-2050-3p, miR-230-5p, miR-245-3p, miR-370-5p, miR-300-3p, miR-27a-3p, miR-320c, let-7f-1-3p, miR-381-3p, miR-320a, miR-362-5p, miR-3154, miR-216a-3p, miR-6516-3p, miR-1193, miR-193a-5p, miR-98-3p, miR-500b-5p, miR-362-5p, miR-326-3p, miR-135a-1-3p, miR-6402, miR-370-5p, miR-2332, miR-34c-3p, miR-502-5p, let-7b-3p, miR-26c, miR-6516-3p, miR-487a-5p, miR-145b, miR-27a-3p, miR-26b-3p, miR-505-5p, miR-2355-3p, miR-500-5p, miR-1193, miR-330-5p, miR-145a-5p, miR-124-3p, miR-1343-5p, miR-98-3p, miR-4429, miR-493-3p, let-7a-3p, miR-27b-3p, miR-21b, miR-128-3p, miR-1388-3p, miR-124a, miR-376b, miR-4286, miR-2478, miR-664b-3p, novel\_17, miR-326, miR-320b, miR-2285af, miR-500a-5p, miR-320d, miR-543-5p, miR-1343-5p, miR-30b-3p

C15orf65 ENSOARGO(chromosome 15) miR-142a-3p, miR-129b-3p, miR-30d-5p, miR-21a-3p, miR-2285c, miR-186-5p, miR-345-5p, miR-339b, miR-30c-1-3p, miR-378a-3p, miR-204-3p, miR-15b-5p, miR-377-3p, miR-139-5p, miR-219b-3p, miR-129-5p, miR-424-5p, miR-17-3p, miR-378c, miR-3184-3p, miR-224-5p, miR-3071-5p, miR-194-5p, miR-374b-3p, miR-1434-3p, miR-497-5p, miR-2889, miR-16b, miR-16-1-3p, miR-339-5p, miR-31-5p, miR-187-3p, miR-103a-3p, miR-411-5p, miR-6238, miR-103, miR-2285g, miR-3431, miR-134-3p, miR-197-5p, miR-2411-3p, miR-194a, miR-224-5p, miR-146a, miR-377-3p, miR-124-5p, miR-382, miR-345-5p, miR-654-3p, miR-432-3p, miR-22841, miR-3065-5p, miR-148a-3p, miR-146b-5p, miR-6516-3p, miR-195a-5p, miR-378f, miR-107, miR-3120-3p, miR-378b, miR-320c, miR-374c-3p, miR-16a, novel\_87, miR-15a, miR-133a-5p, miR-421-5p, miR-656-5p, miR-22-5p, miR-6119-3p, novel\_1, miR-3957-3p, miR-17-3p, novel\_27, miR-326-3p, miR-2428, miR-2284w, miR-2050-3p, miR-230-5p, miR-245-3p, miR-370-5p, miR-300-3p, miR-27a-3p, miR-320c, let-7f-1-3p, miR-381-3p, miR-320a, miR-362-5p, miR-3154, miR-216a-3p, miR-6516-3p, miR-1193, miR-193a-5p, miR-98-3p, miR-500b-5p, miR-362-5p, miR-326-3p, miR-135a-1-3p, miR-6402, miR-370-5p, miR-2332, miR-34c-3p, miR-502-5p, let-7b-3p, miR-26c, miR-6516-3p, miR-487a-5p, miR-145b, miR-27a-3p, miR-26b-3p, miR-505-5p, miR-2355-3p, miR-500-5p, miR-1193, miR-330-5p, miR-145a-5p, miR-124-3p, miR-1343-5p, miR-98-3p, miR-4429, miR-493-3p, let-7a-3p, miR-27b-3p, miR-21b, miR-128-3p, miR-1388-3p, miR-124a, miR-376b, miR-4286, miR-2478, miR-664b-3p, novel\_17, miR-326, miR-320b, miR-2285af, miR-500a-5p, miR-320d, miR-543-5p, miR-1343-5p, miR-30b-3p

RAB27A ENSOARGO(RAB27A, chromosome 10) novel\_17, miR-326, miR-320b, miR-2285af, miR-500a-5p, miR-320d, miR-543-5p, miR-1343-5p, miR-30b-3p

PRUNE ENSOARGO(prune, chromosome 10) novel\_17, miR-211-5p, miR-211, miR-204-5p, miR-7144-5p

miR-1839-5p, miR-3120-5p, miR-544a, miR-484, miR-6529a, miR-4791, miR-148b-5p, miR-1185-3p, miR-2459, miR-539-5p, miR-27a-3p, miR-105-1, novel\_78, miR-330-3p, miR-146b, miR-103a-2-5p, miR-130b-3p, miR-106b-5p, miR-199a-3p, miR-8485, miR-30c-1-3p, let-7c-3p, miR-744-3p, miR-2284b, miR-33a-5p, miR-124a, miR-106a-5p, miR-335-3p, miR-9-3p, novel\_94, miR-96-5p, miR-378j, miR-1185-2-3p, miR-27a-3p, miR-7857-3p, miR-3082-5p, miR-499b-5p, miR-2284g, miR-664b, miR-20a-3p, miR-3958-3p, miR-107-5p, miR-30b-5p, miR-218-5p, miR-101-3p, miR-2440, miR-9-3p, miR-154a, novel\_111, miR-194b-5p, miR-190b-5p, miR-2284j, miR-452-5p, miR-16-1-3p, miR-2284u, miR-148a-5p, miR-142-3p, miR-19b-3p, miR-124-3p, miR-2904, miR-217-5p, miR-188-3p, miR-140-3p, miR-30c-5p, miR-2300b-3p, miR-199a-3p, miR-671-3p, miR-148b-3p, miR-3600, miR-212-5p, miR-106a, miR-1277-5p, miR-30d, miR-221-5p, miR-2284m, miR-106a, miR-202-5p, miR-500a-5p, miR-30b, miR-2424, miR-146a-5p, miR-125b-2-3p, miR-377-5p, miR-20a, miR-543-3p, miR-625-5p, novel\_99, miR-30f, miR-27b-5p, miR-411, miR-433-3p, miR-30d-5p, miR-21a-3p, miR-3613-5p, miR-155-5p, miR-301a-3p, miR-544-3p, miR-27a-5p, miR-216b-3p, miR-30c-1-3p, miR-140-5p, miR-221-5p, miR-660-5p, miR-454-3p, miR-190a-5p, miR-129-5p, novel\_74, miR-17-3p, miR-155-5p, miR-338-5p, miR-3604, miR-29b-2-5p, miR-338-3p, miR-1271, miR-590-3p, miR-539-5p, miR-455-5p, miR-27b-3p, miR-2284x, miR-2284ab, miR-380-3p, miR-16-1-3p, miR-1260b, miR-374b-3p, miR-194-5p, miR-873a-5p, miR-432, miR-1843b-5p, miR-2113, miR-6238, miR-544b, miR-20b, miR-3535, miR-432-5p, miR-130a-3p, miR-26b-3p, miR-377-5p, miR-133b-5p, miR-660, miR-330-3p, miR-190a, miR-105-5p, miR-455-5p, miR-194a, miR-106a-5p, miR-17-5p, miR-146a, miR-503-3p, miR-2285r, miR-382, miR-668-3p, let-7f-2-3p, let-7f-2-3p, miR-6210, miR-146b-5p, miR-2219a, miR-19a-3p, miR-216a-3p, miR-378c, miR-378a-3p, miR-378c, miR-378d, miR-378e, miR-378h, miR-378a-3p, miR-422a, miR-378i, miR-378b, miR-378f, miR-378c

UNC13C ENSOARGO(unc-13 h

WDR72 ENSOARGO(WD repea

C2orf40 ENSOARGO( chromoso

miR-219a-5p, miR-194b-5p, miR-2447, miR-8095, novel\_82, miR-2284q, miR-499b-5p, miR-541-5p, miR-378e, miR-199b-5p, miR-140-5p, miR-382-3p, miR-494-3p, miR-3187-3p, miR-4532, miR-378d, novel\_115, miR-326, miR-1306-5p, miR-320b, miR-214-3p, miR-199b-5p, miR-491-5p, miR-145b, novel\_78, miR-2300a-5p, miR-409b, miR-9788-3p, miR-142-5p, miR-142-3p, miR-30b-3p, miR-412-3p, miR-296-5p, miR-378b, miR-450b-5p, miR-378c, miR-214, miR-3074-5p, miR-378c, miR-6134, miR-6525, miR-142a-5p, miR-19b-1-5p, miR-669a-3p, miR-4492, miR-155-5p, miR-216b-3p, miR-660-5p, miR-378a-3p, miR-140-5p, miR-877-5p, miR-155-5p, miR-204-3p, miR-21a-3p, miR-186-5p, miR-216c-5p, miR-377-5p, miR-142a-3p, miR-422a, miR-345-3p, miR-30b-3p, miR-466i-5p, miR-760-3p, miR-320d, miR-2284m, miR-1b-3p, miR-3600, miR-340-5p, miR-378a-3p, miR-5703, miR-1193, miR-2366, miR-378i, miR-4429, miR-135a-2-3p, miR-199b-5p, miR-326-3p, miR-24-3p, novel\_87, miR-382-5p, miR-203b-5p, miR-3120-3p, miR-320b, miR-216b-3p, miR-3074-5p, novel\_68, miR-320c, miR-6535, miR-670-3p, miR-1306, miR-3970, miR-378f, let-7j, miR-2284l, miR-432-3p, miR-432-3p, novel\_51, miR-194a, miR-2411-3p, miR-455-5p, miR-365b-5p, miR-660, miR-452-5p, miR-124-5p, miR-377-5p, miR-31-5p, miR-149-5p, miR-2284d, miR-194-5p, miR-145a-5p, miR-1434-3p, miR-19b-2-5p, miR-455-5p, miR-30b-3p, miR-2284ab, miR-2284v, miR-365a-5p, miR-378c, miR-3969, miR-331-3p, miR-2332, miR-2284k, miR-141-3p, miR-154b-5p, miR-324-5p, miR-199a-5p, miR-320a, miR-3074-1-3p, novel\_48, miR-876-3p, miR-199a-5p, miR-148b-5p, miR-200c, miR-2285af, novel\_96, miR-200a-3p, miR-127-5p, miR-200c-3p, miR-450a-2-3p, miR-2898, miR-1224-5p, miR-412, miR-429-3p, novel\_121, miR-378h, miR-758-5p, miR-23b-5p, miR-330-5p, miR-345-3p, miR-3591-5p, miR-155-5p

novel\_101, miR-135a-2-3p, miR-335-5p, miR-326-3p, miR-2284w, miR-16a, miR-382-5p, miR-15a, miR-20a-5p, miR-6402, miR-421-5p, miR-6123, miR-147-5p, novel\_1, miR-329-5p, miR-216b-3p, miR-6535, miR-320c, miR-146b-3p, miR-2404, miR-299b-3p, miR-150-5p, miR-1306, miR-216a-3p, miR-2285ab, miR-18b, miR-7975, miR-6395, miR-195a-5p, miR-450b-3p, miR-1291, miR-363-5p, miR-130b-5p, miR-6240, miR-197-5p, miR-330-3p, miR-17-5p, miR-106a-5p, miR-2411-3p, miR-224-5p, miR-377-3p, miR-20b, miR-3431, miR-134-3p, miR-185-5p, miR-197-3p, miR-22-3p, miR-374b-3p, miR-3071-5p, miR-873a-5p, miR-1843b-5p, miR-497-5p, miR-26a-2-3p, miR-6239, miR-30b-3p, miR-16b, miR-16-5p, miR-193a-5p, miR-1197-3p, miR-26c, miR-3969, miR-409-3p, novel\_63, miR-31-3p, miR-615-5p, miR-1271, miR-141-3p, miR-874-3p, miR-133c, miR-23b, miR-18a, miR-320a, miR-17-5p, miR-3154, miR-488-3p, miR-20b-5p, miR-485-5p, miR-10b-3p, miR-329a, miR-329b, miR-3064-5p, miR-30a-3p, novel\_39, miR-200a, miR-376c-5p, miR-376b-5p, miR-29a-5p, miR-1271-3p, miR-30c-2-3p, miR-125a-3p, miR-200a-3p, miR-543-5p, miR-127-5p, miR-412, miR-18b-5p, miR-299a-3p, miR-545-5p, novel\_121, miR-322-5p, miR-330-5p, miR-23b-5p, miR-345-3p, miR-128-3p, miR-582-3p, miR-1296-5p, miR-2285f, miR-190b-5p, miR-452-5p, novel\_60, miR-3059-5p, miR-2447, miR-541-3p, miR-3956-3p, miR-877-3p, miR-218-5p, miR-2285n, miR-4726-5p, miR-3968, miR-335, miR-4792, miR-3064-5p, miR-378g, miR-140-5p, miR-361-3p, miR-544-5p, miR-877-3p, miR-23a-3p, miR-1388-3p, miR-106a-5p, miR-424-5p, miR-30c-1-3p, miR-362-3p, miR-323b-3p, miR-182-5p, miR-16b, miR-106b-5p, miR-320b, miR-326, novel\_103, miR-1306-5p, miR-214-3p, miR-3085-3p, miR-3955-3p, miR-5010-3p, novel\_78, novel\_4, miR-1343-3p, miR-330-3p, miR-216a-3p, miR-9788-3p, miR-2459, miR-322b, miR-412-3p, miR-7857, miR-30b-3p, miR-329-3p, miR-296-

miR-204-5p, miR-486b-3p, miR-191-5p, novel\_9, miR-331-3p, miR-6740-5p, miR-125b-5p, miR-409-3p, miR-370-5p, miR-181c-3p, miR-1814c, miR-329b, miR-3154, miR-154b-5p, miR-141-3p, miR-125a, miR-874-3p, miR-543-5p, novel\_96, novel\_127, miR-200a-3p, miR-339a, miR-3065-3p, miR-1271-3p, miR-2285b, miR-2478, miR-23b-5p, miR-330-5p, miR-214-5p, novel\_121, miR-24-2-5p, miR-6516-5p, novel\_79, miR-7641, miR-412, miR-299a-3p, miR-203b-5p, miR-128-1-5p, miR-576-3p, miR-326-3p, miR-2284w, miR-211, miR-193b-3p, miR-1193, miR-6395, miR-1291, miR-412-3p, miR-150-5p, miR-18a-3p, miR-2387, miR-6535, miR-669, novel\_69, miR-299b-3p, miR-320b, miR-329-5p, miR-125a-5p, miR-660, miR-193a-3p, miR-378a-5p, miR-330-3p, miR-7-5p, miR-296-3p, miR-296-3p, miR-130b-5p, miR-6240, miR-744-5p, miR-188-5p, miR-30b-3p, miR-708-3p, miR-7b-5p, miR-1434-3p, miR-2355-3p, miR-412-5p, miR-134-3p, miR-339-5p, miR-187-3p, miR-31-5p, miR-4492, miR-874-5p, miR-130b-5p, miR-324-3p, miR-665, miR-3604, miR-6134, miR-214, miR-539-5p, miR-4510, miR-625-5p, miR-1895, miR-1827, miR-339b, miR-204-3p, novel\_25, miR-6516, miR-193b-3p, miR-6130, miR-370-5p, miR-3065-3p, miR-182-5p, miR-2331-3p, miR-504-5p, miR-660-5p, miR-1277-5p, miR-299-3p, miR-760-3p, miR-324-3p, miR-185-3p, miR-125b, miR-210-5p, miR-486-3p, miR-143-3p, miR-376a-5p, miR-29b-1-5p, miR-195a-3p, miR-345-3p, miR-329a-5p, miR-133a-3p, miR-33b-3p, miR-1197-5p, novel\_133, miR-191, miR-2300b-3p, miR-193b-5p, miR-1247-5p, miR-328-3p, miR-7859, miR-212-5p, miR-548e-3p, miR-18a-3p, miR-4726-5p, miR-2285n, novel\_60, miR-3059-5p, miR-2447, miR-541-3p, miR-3956-3p, miR-335-3p, miR-1983, miR-3963, miR-147-3p, miR-181a-3p, miR-504, miR-361-3p, miR-203-3p, miR-378g, miR-3082-5p, miR-7689-3p, miR-211-5p, miR-214-3p, miR-491-5p, miR-3955-3p, miR-2957, miR-29b-1-5p, miR-182-5p, miR-326, miR-5126, miR-

miR-21a-3p, miR-411, miR-129b-3p, miR-500a-3p, miR-34b-5p, miR-186-5p, miR-582-5p, miR-625-5p, miR-545-3p, miR-552-3p, miR-216b-5p, miR-2284s, miR-10a, miR-6516, miR-582-5p, let-7i-5p, miR-204-3p, miR-222-3p, let-7f, miR-2285j, miR-664a-5p, miR-665, miR-219b-3p, miR-30a-3p, novel\_74, miR-129-5p, miR-500, miR-145a-3p, miR-539-5p, miR-433-5p, let-7b, miR-425-5p, miR-665-5p, miR-224-5p, miR-346, miR-142a-5p, miR-10b-5p, miR-6525, miR-338-3p, let-7b-5p, miR-2300b-3p, miR-196l, miR-191, miR-1197-5p, miR-188-3p, miR-19b-3p, novel\_73, miR-361-5p, miR-548e-3p, miR-505-3p, miR-30d-3p, miR-340-5p, miR-200b, miR-7859, miR-2285p, miR-196a-3p, miR-92a-1-5p, miR-500a-5p, miR-98-5p, let-7k, miR-3653-3p, miR-30b-3p, miR-329a-5p, miR-10a-3p, miR-181b-1-3p, miR-421-5p, miR-376a-5p, miR-380-3p, miR-2424, miR-221, miR-378j, miR-299b-5p, novel\_94, miR-544-5p, miR-1983, miR-335-3p, miR-10b, miR-452-3p, miR-2285u, miR-2483-3p, miR-1185-2-3p, let-7d-5p, miR-382-3p, miR-2285n, miR-2285y, miR-450a-5p, miR-628-3p, miR-499a-5p, miR-2284q, miR-3964, miR-2285t, miR-2447, miR-6527, novel\_111, miR-219a-2-3p, miR-7705, miR-1285-5p, miR-10b, miR-758-3p, miR-125b-2-3p, miR-30b-3p, miR-7857, miR-101a-5p, miR-1839-5p, miR-16-2-3p, miR-2284aa, miR-330-3p, miR-199b-3p, miR-222-5p, miR-181b-2-3p, miR-142-5p, miR-1185-3p, miR-216a-3p, miR-221-3p, miR-1306-5p, let-7e, miR-2330-5p, miR-101b-3p, let-7a-5p, miR-652-5p, miR-33a-5p, let-7c-3p, miR-758-3p, miR-491-3p, miR-1b-5p, miR-3187-3p, miR-331-5p, miR-381-3p, miR-200a-5p, miR-345-5p, let-7g-3p, miR-10a-3p, miR-10b-3p, miR-1248, miR-671-5p, miR-7144-5p, miR-3068-3p, miR-2285aa, miR-223-5p, miR-135a-1-3p, novel\_63, miR-2433, miR-26c, novel\_9, miR-374b-3p, miR-191-5p, miR-592, miR-6128, miR-193a-5p, miR-374a-3p, miR-1990, miR-3578, miR-300, let-7d, miR-411-3p, miR-10a-3p, miR-129b-5p, miR-2285ab, let-7f-1-3p, miR-1983, miR-2312, miR-133b-3p, miR-412-3p, miR-2285aa, miR-552-3p, miR-532-5p, miR-144-5p, miR-6516, miR-3082-5p, miR-365a-3p, miR-489, let-7b-3p, miR-133a-5p, miR-6402, miR-129-5p, novel\_74, miR-155-5p, miR-2285f, miR-133a-3p, miR-144-5p, miR-3059-5p, miR-539-5p, miR-3184-3p, novel\_23, novel\_133, miR-143-5p, miR-218-1-3p, miR-2284x, miR-33b-3p, miR-3600, miR-582-3p, miR-6516-5p, miR-3653-3p, miR-21-3p, miR-450a-2-3p, miR-466i-5p, miR-101-5p, miR-29a-5p, miR-148b-5p, miR-2285r

MAPK6

ENSOARGO(mitogen-

TMOD3

ENSOARGO(tropomod-



|         |                    |                                                                                                                                                                                                                                                                                                                                                                                                                                                                                                                                                                                                                                                                                                                                                                                                                                                           |
|---------|--------------------|-----------------------------------------------------------------------------------------------------------------------------------------------------------------------------------------------------------------------------------------------------------------------------------------------------------------------------------------------------------------------------------------------------------------------------------------------------------------------------------------------------------------------------------------------------------------------------------------------------------------------------------------------------------------------------------------------------------------------------------------------------------------------------------------------------------------------------------------------------------|
|         |                    | miR-876-3p, let-7g-3p, miR-374c-3p, miR-300-3p, miR-139-5p, miR-769, miR-656-3p, miR-140-5p, miR-410-5p, miR-2285j, miR-19b-1-5p, miR-769-5p, miR-374b, miR-200b-3p, miR-376a-5p, miR-1290, miR-217-5p, miR-1193, miR-9-5p, miR-200b, miR-548e-3p, miR-2285ad, miR-429-3p, miR-376a-5p, miR-450a-2-3p, miR-760-3p, miR-200c-3p, miR-2285af, miR-374a-5p, miR-200c, miR-500a-5p, miR-217, miR-376a-5p, miR-450b-5p, miR-1957a, miR-2424, miR-450c-5p, miR-376a-2-5p, novel_94, miR-139-5p, novel_68, miR-20a-3p, miR-329-5p, miR-374b-5p, miR-450a-5p, miR-656-5p, miR-2284q, miR-6402, miR-142b, miR-769-5p, miR-9-5p, miR-2285x, miR-1388-5p, miR-1839-5p, miR-101c, miR-455-5p, miR-2284x, miR-484, miR-19b-2-5p, miR-374b-3p, miR-2320-3p, miR-31-5p, miR-3955-5p, miR-3955-3p, miR-452-5p, miR-455-5p, miR-101b-3p, let-7c-3p, miR-33a-5p, miR-628-5p |
| AP4E1   | ENSOARGO( adaptor- |                                                                                                                                                                                                                                                                                                                                                                                                                                                                                                                                                                                                                                                                                                                                                                                                                                                           |
| TRPM7   | ENSOARGO( transien | miR-2285w, miR-2284h-5p, miR-22-3p, miR-135a-1-3p, miR-378b, miR-3604, miR-22-3p, miR-2284q, miR-186-5p                                                                                                                                                                                                                                                                                                                                                                                                                                                                                                                                                                                                                                                                                                                                                   |
| FAM227B | ENSOARGO( family w | miR-3074-5p, miR-3074-5p, miR-758-5p                                                                                                                                                                                                                                                                                                                                                                                                                                                                                                                                                                                                                                                                                                                                                                                                                      |
|         |                    | miR-212-3p, miR-374a-3p, miR-410-3p, miR-374b-3p, miR-30a-3p, miR-29b-2-5p, novel_87, miR-382-3p, miR-30e-3p, miR-370-3p, miR-452-3p, miR-20a-3p, novel_99, miR-10a-3p, miR-433-3p, miR-140-5p, miR-29a-5p, miR-2285b, miR-29b-1-5p, miR-29b-2-5p, miR-30a-3p, let-7c-3p, miR-10a-3p, miR-200c-3p, miR-29b-1-5p, miR-199a-3p, miR-200c, miR-582-3p, miR-199a-3p, miR-455-3p, miR-222-5p, miR-200b, miR-30d-3p, miR-429-3p, miR-200b-3p, miR-361-5p, miR-3591-5p, miR-1434-3p                                                                                                                                                                                                                                                                                                                                                                              |
| FGF7    | ENSOARGO( fibrobla |                                                                                                                                                                                                                                                                                                                                                                                                                                                                                                                                                                                                                                                                                                                                                                                                                                                           |

miR-138, miR-1260b, miR-873a-5p, miR-432, miR-1434-3p, miR-1843b-5p, miR-450c-3p, miR-432-5p, miR-2285g, miR-185-5p, miR-2355-3p, miR-3955-5p, miR-31-5p, miR-133b-5p, miR-378a-5p, miR-125a-5p, miR-452-5p, miR-330-3p, miR-365b-5p, miR-105-5p, miR-136-3p, miR-654-3p, miR-345-5p, miR-6240, miR-493-5p, miR-382, miR-668-3p, miR-376a-2-5p, miR-378f, miR-2285ab, miR-18a-3p, miR-3065-5p, miR-378b, miR-670-3p, miR-411b-3p, miR-26b-5p, miR-656-5p, miR-199c, miR-147-5p, miR-133a-5p, miR-28c, miR-382-5p, miR-24-3p, miR-2284w, miR-199b-5p, miR-342-3p, miR-136-3p, miR-335-5p, miR-1839-3p, miR-2285x, miR-300, miR-105-2, miR-200b-3p, miR-1290, miR-378h, miR-582-3p, miR-450a-1-3p, miR-429-3p, miR-7641, miR-376a-5p, miR-28-3p, miR-127-5p, miR-6536, miR-200c-3p, novel\_127, miR-543-5p, miR-1260a, miR-200c, miR-30f, miR-30c-2-3p, miR-3071-3p, miR-450b-5p, miR-28b, novel\_39, miR-199a-5p, miR-1957a, miR-2285b, miR-29b-2-5p, miR-10b-3p, miR-345-5p, miR-190a-3p, miR-1248, miR-137-3p, miR-3965, miR-199a-5p, miR-574-5p, miR-874-3p, miR-370-3p, miR-125a, miR-215-5p, miR-138-5p, miR-5100, miR-125b-5p, miR-100-3p, miR-409-3p, miR-1260b, miR-145-3p, miR-378c, miR-365a-5p, miR-28a-3p, miR-6128, miR-3607-3p, miR-1388-5p, miR-378c, miR-16-2-3p, miR-1839-5p, miR-3120-5p, miR-6529a, miR-378b, miR-484, miR-125b-2-3p, miR-758-3p, miR-455-3p, miR-421, miR-2285e, miR-330-3p, miR-199b-3p, miR-105-1, miR-2300a-5p, miR-222-5p, miR-3955-3p, miR-199b-5p, miR-342, miR-29b-1-5p, miR-378d, miR-30c-1-3p, miR-8485, miR-758-3p, miR-1839-3p, miR-101b-3p, miR-376b, miR-33a-5p, miR-652-5p, miR-504, miR-493-5p, miR-335-3p, novel\_94, miR-9-3p, miR-199b-5p, miR-381-3p, miR-129b-5p, miR-378e, miR-139-5p, miR-2319b, miR-452-3p, miR-20a-3p, miR-541-5p, miR-7977, miR-3968, miR-499a-5p, miR-335, miR-2284a, novel\_111, miR-9-3p, miR-1285-

GALK2 ENSOARGO(galactok

miR-125b-5p, miR-409-3p, miR-28-5p, miR-374b-3p, miR-134-5p, miR-1197-3p, miR-374a-3p, miR-1260b, miR-381-3p, miR-503-3p, miR-320a, miR-18a, miR-3154, miR-876-3p, let-7g-3p, miR-7144-5p, miR-125a, miR-1271, miR-300-3p, miR-1260a, miR-30f, miR-3071-3p, miR-152-3p, miR-29b-2-5p, miR-148b-5p, miR-1957a, miR-490-3p, miR-1271-3p, miR-3578, miR-134, miR-300, let-7a-2-3p, miR-222, miR-2285ad, miR-18b-5p, miR-134-5p, miR-142b, miR-382-5p, miR-6119-3p, miR-199c, miR-335-5p, miR-301b-3p, miR-2284w, miR-2285ab, miR-148a-3p, miR-18b, miR-150-5p, miR-412-3p, miR-3120-3p, miR-320c, miR-7-5p, miR-582, miR-2331-5p, miR-125a-5p, miR-382, let-7a-2-3p, miR-1843b-5p, miR-1285, novel\_23, miR-219a-1-3p, miR-1260b, miR-7862, miR-130a-3p, miR-412-5p, miR-222-3p, miR-151-3p, miR-320e, miR-29b-2-5p, miR-708-5p, miR-454-3p, miR-590-3p, miR-3074-2-3p, miR-6134, miR-2312, miR-18a-5p, miR-582-5p, novel\_99, miR-2331-3p, miR-548o-3p, miR-301a-3p, miR-582-5p, miR-139-5p, novel\_25, miR-618, miR-324-3p, miR-125b, miR-320d, miR-3653-3p, miR-2484, miR-216c-5p, miR-29b-1-5p, miR-125b-2-3p, miR-130a-5p, miR-2432, miR-143-3p, miR-1197-5p, miR-4429, novel\_73, miR-3600, miR-148b-3p, miR-199a-3p, miR-2285y, miR-3968, miR-335, miR-374a-3p, miR-2285t, miR-3059-5p, miR-2285f, miR-877-3p, novel\_111, miR-409-5p, miR-221, miR-129b-5p, miR-668-5p, miR-1983, miR-139-5p, miR-4443, miR-199a-3p, miR-320b, novel\_103, miR-29b-1-5p, miR-130b-3p, miR-101b-3p, let-7c-3p, miR-8485, miR-101a-5p, miR-151a-3p, miR-199b-3p, miR-539-5p, miR-221-3p, miR-1306, miR-140-5p, miR-7144-5p, miR-6516-3p, miR-877-3p, miR-136-5p, let-7g-3p, miR-320b, miR-125a, miR-296-3p, miR-877-5p, miR-6516, miR-125b-5p, miR-33a-3p, miR-2285j, miR-625-3p, miR-206, miR-335, miR-335-5p, miR-326-3p, miR-206-3p, miR-1197-3p, miR-1a-3p, miR-330-5p, miR-188-3p, miR-30b-3p, miR-3591-5p, miR-873a-5p, let-7a-2-3p, miR-30b-3p, miR-380-3p, miR-1224-5p, miR-216a-3p, miR-340-5p, miR-6516-5p, miR-125b, miR-92a-1-5p, miR-326, miR-1306-5p, miR-125a-5p, miR-1277-5p, miR-2484, miR-21-3p, miR-1185-5p, miR-1, miR-3187-3p, let-7a-2-3p, miR-380-3p, miR-654-3p

miR-17-3p, miR-6516-3p, miR-424-5p, miR-454-3p, let-7f, miR-2285j, miR-224-5p, let-7b-5p, let-7b, miR-214, miR-18a-5p, miR-339b, miR-2312, miR-186-5p, miR-2285c, miR-299, miR-433-3p, miR-129b-3p, miR-544-3p, miR-301a-3p, miR-15b-5p, let-7i-5p, novel\_25, miR-660-5p, miR-3065-3p, miR-98-5p, miR-106a, let-7k, miR-21-3p, miR-618, miR-196a-3p, miR-219b-5p, miR-181b-1-3p, miR-380-3p, miR-216c-5p, miR-20a, miR-195a-3p, miR-19b-3p, miR-142-3p, miR-148a-5p, miR-16-1-3p, miR-196l, miR-1246, miR-1434-5p, miR-217-5p, miR-15a-5p, miR-148b-3p, miR-383-5p, miR-199a-3p, miR-106a, miR-4726-5p, miR-3958-3p, miR-3968, miR-2284q, miR-2440, miR-107-5p, miR-371a-5p, miR-885-5p, miR-452-5p, miR-136-5p, miR-544-5p, miR-1983, miR-376a-3p, miR-409-5p, miR-2483-3p, miR-1185-2-3p, miR-376d, miR-203-3p, let-7d-5p, miR-20a-3p, miR-452-3p, miR-7689-3p, miR-130b-3p, miR-214-3p, let-7e, miR-103a-2-3p, miR-199a-3p, miR-106b-5p, miR-16b, miR-2310, miR-8485, miR-193a, miR-424-5p, miR-106a-5p, let-7a-5p, miR-544a, miR-299a-5p, miR-1388-5p, miR-2284aa, miR-143-5p, miR-125b-2-3p, miR-376b-3p, miR-2285e, miR-1185-3p, miR-2459, miR-455-3p, miR-199b-3p, miR-330-3p, miR-181b-2-3p, miR-767-5p, miR-31-3p, miR-135a-1-3p, miR-34c-3p, miR-29b-3p, miR-135a-5p, miR-409-3p, miR-93, miR-365a-5p, miR-145-3p, miR-28a-3p, miR-16-5p, let-7g-3p, miR-767, miR-1248, miR-1814c, miR-20b-5p, miR-30e-5p, miR-17-5p, miR-18a, miR-93-5p, miR-137-3p, miR-874-3p, miR-141-3p, miR-2285aa, let-7f-5p, miR-17-3p, miR-28-3p, miR-152-3p, miR-200a-3p, miR-107, miR-376b-3p, miR-2285af, let-7c-5p, miR-217, miR-339a, miR-148b-5p, miR-450b-5p, miR-192-3p, miR-2285b, miR-29a-5p, let-7g, miR-3065-3p, let-7d, let-7a-2-3p, miR-30a-5p, miR-29d-3p, miR-322-5p, novel\_121, miR-582-3p, miR-2284z, miR-18b-5p, novel\_79, miR-29a, miR-6119-3p, miR-199c, miR-147-5p, miR-126a-5p, miR-455-3p, miR-221-3p, miR-29b, miR-432-3p, miR-432-3p, miR-8485, miR-101b-3p, miR-23a-3p, miR-466f-3p, miR-32, miR-29a-3p, miR-2404, miR-144-3p, miR-412-3p, miR-181a-3p, miR-1983, miR-148a-3p, miR-221, miR-140-5p, novel\_111, miR-361-3p, miR-212-3p, miR-885-5p, miR-363-3p, miR-29c-3p, miR-9-5p, miR-29a, miR-4726-5p, miR-92a-3p, miR-4324, miR-148b-3p, miR-9-5p, miR-23b-3p, miR-486-5p, miR-222, miR-3600, miR-300, miR-1193, miR-5703, miR-29d-3p, miR-92b-3p, miR-3956-5p, miR-216c-5p, miR-29b-2-5p, miR-152-3p, miR-92a-3p, miR-25-3p, miR-656-3p, miR-32-5p, miR-552-3p, miR-216b-3p, miR-767, miR-485-5p, miR-625-5p, miR-2448-3p, miR-381-3p, miR-23b, miR-181c-3p, miR-145a-3p, miR-767-5p, miR-29b-3p, miR-222-3p, miR-29b-2-5p, miR-144

miR-29d-3p, miR-330-5p, miR-128-3p, miR-2285ad, miR-758-5p, miR-2284z, novel\_121, miR-205-5p, miR-2285af, miR-664-3p, miR-450a-2-3p, miR-127-5p, miR-200a-3p, novel\_127, miR-152-3p, miR-1, miR-4286, miR-1271-3p, miR-450c-5p, miR-488-3p, miR-301, miR-767, miR-345-5p, miR-7144-5p, miR-874-3p, miR-370-3p, miR-2355-5p, miR-141-3p, miR-1271, miR-125a, miR-769, miR-2284k, miR-29b-3p, miR-5100, miR-125b-5p, miR-409-3p, miR-3969, miR-767-5p, miR-486b-3p, miR-204-5p, miR-28-5p, miR-1306-5p, miR-1197-3p, miR-432, miR-873a-5p, miR-19b-2-5p, miR-2113, miR-1285, miR-22-3p, miR-145a-5p, novel\_23, miR-194-5p, miR-2284ab, miR-29b, miR-125b-1-3p, miR-188-5p, miR-130a-3p, miR-26b-3p, miR-432-5p, miR-3535, miR-149-5p, miR-224-5p, miR-582, miR-330-3p, novel\_51, miR-378a-5p, miR-2285l, miR-452-5p, miR-125a-5p, miR-660, miR-6240, miR-628-5p, miR-654-3p, miR-432-3p, miR-22841, let-7j, miR-345-5p, miR-148a-3p, miR-3970, miR-150-5p, miR-216a-3p, miR-3591-3p, miR-18a-3p, miR-450b-3p, miR-19a-3p, miR-2319a, miR-6395, miR-26b-5p, miR-146b-3p, novel\_69, miR-29a-3p, miR-677, miR-6535, miR-181b-3p, miR-502-5p, miR-4324, miR-6529b, miR-576-3p, miR-206, miR-29a, miR-656-5p, novel\_120, miR-135a-2-3p, miR-29c-3p, miR-211, miR-24-3p, miR-326-3p, miR-301b-3p, miR-2300b-3p, miR-2904, miR-5703, miR-1197-5p, miR-1434-5p, miR-142-3p, miR-33b-3p, miR-19b-3p, miR-133a-3p, miR-218-1-3p, miR-18a-3p, miR-3600, miR-148b-3p, novel\_83, miR-328-3p, miR-26a-5p, miR-219b-5p, miR-185-3p, miR-125b, miR-92a-1-5p, miR-1277-5p, miR-21-3p, miR-29b-1-5p, miR-181b-1-3p, miR-2424, miR-2432, miR-486-3p, miR-143-3p, miR-21a-3p, miR-27b-5p, miR-345-5p, miR-625-5p, miR-1895, miR-2331-3p, miR-660-5p, miR-216b-3p, miR-21-3p, miR-582-5p, miR-301a-3p, miR-6130, miR-22-3p, miR-324-3p, miR-19b-1-5p, miR-320e, miR-454-3p, miR-874-5p, miR-708-5p, miR-1197, miR-539-5p, miR-4510, miR-145a-3p, miR-301a-5p, miR-206, miR-2285f, miR-326-3p, miR-361-3p, miR-3065-5p, miR-378j, miR-2285ab, miR-655-5p, miR-3064-5p, miR-20a-3p, miR-203-3p, miR-1185-2-3p, miR-670-3p, miR-330-3p, novel\_51, miR-326, miR-3085-3p, miR-744-3p, let-7f-2-3p, miR-33a-5p, let-7f-2-3p, miR-130b-5p, miR-6240, miR-1a-3p, miR-432, miR-19b-2-5p, miR-1843b-5p, miR-301b-5p, miR-21b, miR-544a, miR-31-5p, miR-330-3p, novel\_116, miR-544b, miR-1185-3p, miR-432-5p, miR-19b-1-5p, miR-338-5p, miR-5100, miR-2332, miR-130b-5p, miR-145a-3p, miR-206-3p, miR-129b-3p, miR-671-5p, miR-2312, miR-544-3p, miR-216b-5p, miR-200c, miR-200c-3p, miR-3064-5p, miR-1, miR-195a-3p, miR-3529-3p, miR-143-3p, miR-330-5p, miR-1434-5p, miR-1197-5p, miR-200b-3p, miR-582-3p, miR-3600, miR-429-3p, miR-383-5p, miR-200b

CLEC12A ENSOARGO(C-type 1  
miR-450b-3p, miR-155-5p, miR-6516-3p, miR-190a-5p, let-7f, miR-2285j, novel\_63, miR-30e-3p, miR-370-5p, miR-5100, miR-135a-1-3p, miR-30a-3p, miR-665, miR-122-5p, let-7b-5p, miR-145-3p, let-7b, miR-1306-5p, miR-145a-3p, miR-3958-5p, miR-3074-2-3p, miR-665-5p, miR-345-5p, miR-345-5p, miR-7144-5p, miR-671-5p, miR-450a-1-3p, miR-129b-3p, miR-320a, miR-216b-5p, miR-133c, miR-204-3p, miR-877-5p, miR-155-5p, let-7i-5p, miR-221-5p, miR-140-5p, miR-370-5p, miR-320d, miR-202-5p, miR-127-5p, miR-98-5p, miR-200c-3p, let-7f-5p, miR-221-5p, let-7k, miR-2285af, miR-205-5p, miR-200c, miR-26a-5p, miR-2285p, let-7c-5p, miR-24-2-5p, miR-376a-5p, let-7g, miR-181a-2-3p, miR-345-3p, miR-411-3p, miR-142-3p, let-7d, miR-4429, miR-155-5p, miR-200b-3p, miR-196a-5p, miR-1961, miR-5703, miR-200b, miR-450a-1-3p, miR-616-3p, miR-429-3p, miR-212-5p, miR-3964, miR-4324, miR-218-5p, miR-101-3p, miR-142b, let-7i, miR-3959-3p, miR-2447, miR-190b-5p, miR-1193, miR-410-5p, miR-335-3p, miR-7975, miR-493-5p, let-7e-5p, miR-6516-3p, miR-378j, miR-21c, miR-670-3p, miR-320c, let-7d-5p, miR-24-1-5p, miR-655-5p, miR-26b-5p, miR-3120-3p, miR-196b-5p, let-7e, miR-7-5p, miR-320b, miR-190a, miR-323b-3p, miR-3187-3p, miR-345-5p, let-7a-5p, miR-101b-3p, miR-493-5p, miR-382-3p, miR-21-5p, miR-21b, miR-1839-5p, miR-7b-5p, miR-542-3p, miR-323b, miR-450c-3p, miR-197-3p, miR-3071-5p, novel\_23, let-7g-5p, miR-421, novel\_78

miR-1434-3p, miR-7b-5p, miR-873a-5p, miR-653, miR-708-3p, miR-3071-5p, miR-374b-3p, miR-16-1-3p, miR-16b, miR-2284ab, miR-27b-3p, miR-188-5p, miR-26a-2-3p, miR-497-5p, miR-3955-5p, miR-412-5p, miR-2284d, miR-7-5p, miR-2285l, miR-378a-5p, miR-493-5p, miR-382, miR-2284l, miR-432-3p, miR-503-3p, let-7j, miR-18b, miR-376b-5p, miR-21c, miR-150-5p, miR-412-3p, miR-195a-5p, miR-135b-5p, miR-7975, miR-329-5p, miR-7-1-3p, miR-3120-3p, miR-26b-5p, miR-374c-3p, novel\_69, miR-670-3p, miR-144-3p, miR-142b, miR-6402, miR-502-5p, miR-15a, miR-16a, novel\_1, miR-199c, miR-147-5p, miR-495-3p, miR-2285x, miR-199b-5p, miR-2428, miR-3591-5p, miR-345-3p, miR-200b-3p, miR-429-3p, miR-2285ad, miR-18b-5p, miR-322-5p, miR-129-1-3p, miR-582-3p, miR-2284z, miR-200c, miR-664-3p, miR-219-3p, miR-2285af, miR-217, miR-127-5p, miR-200c-3p, miR-28-3p, miR-200a-3p, miR-450c-5p, miR-2285b, miR-199a-5p, miR-376b-5p, miR-376c-5p, miR-362-5p, miR-18a, miR-376c-5p, miR-23b, miR-376c-5p, miR-3068-3p, miR-141-3p, miR-2285aa, miR-365a-3p, miR-2284n, miR-199a-5p, miR-135a-1-3p, miR-2332, miR-2284k, miR-135a-5p, miR-144, miR-31-3p, miR-2284v, miR-1306-5p, miR-28a-3p, miR-16-5p, miR-374a-3p, miR-323-3p, miR-500b-5p, miR-301b-5p, miR-3120-5p, miR-2284aa, miR-16-2-3p, miR-199b-3p, novel\_78, miR-27a-3p, miR-5010-3p, miR-539-5p, miR-421, miR-126a-5p, miR-500-5p, miR-216a-3p, miR-16b, miR-29b-1-5p, miR-103a-2-5p, miR-214-3p, miR-199b-5p, miR-424-5p, miR-101b-3p, miR-376b, miR-23a-3p, miR-3187-3p, miR-409-5p, miR-199b-5p, miR-378j, miR-129b-5p, miR-9-3p, miR-1983, miR-493-5p, miR-20a-3p, miR-664b, miR-4792, miR-499b-5p, miR-2285u, miR-3596, miR-27a-3p, miR-2285n, miR-301a-5p, miR-107-5p, miR-2285y, miR-450a-5p, miR-499a-5p, miR-3964, miR-374a-3p, miR-212-3p, miR-3956-3p, miR-2447, novel\_60, miR-452-5p, miR-362-5p, miR-219a-2-3p, miR-1285-5p, miR-2300b-3p, miR-340-3p, miR-2300a-5p, novel\_78, miR-339-5p, novel\_79, miR-412-5p, miR-185-5p, miR-129-1-3p, miR-7b-5p, miR-5703, miR-1197-5p, miR-330-5p, miR-382-3p, miR-495-5p, miR-181a-2-3p, miR-30c-1-3p, miR-432-3p, miR-29a-5p, miR-7-5p, miR-326, miR-1306-5p, miR-30c-2-3p, miR-185-3p, miR-339a, miR-25-5p, miR-30c-1-3p, miR-10b, miR-452-3p, miR-2355-5p, miR-320b, novel\_69, miR-6535, miR-4443, miR-361-3p, miR-1306, miR-1306-3p, miR-181a-3p, miR-339b, miR-625-5p, miR-1306-5p, miR-3184-3p, miR-129-2-3p, miR-326-3p, miR-181c-3p, miR-2428, miR-1306-3p, miR-6740-5p, miR-3968, miR-4492

MYEF2

ENSOARGO(myelin e

SHF

ENSOARGO(Src homo

miR-181b-2-3p, miR-330-3p, miR-1343-3p, miR-455-3p, miR-148b-5p, miR-2459, miR-153, miR-539-5p, miR-101c, miR-21b, miR-124a, miR-8485, miR-505, miR-153-3p, miR-381-5p, miR-491-5p, miR-130b-3p, miR-211-5p, miR-2319b, miR-3596, miR-2483-3p, miR-378j, miR-221, miR-493-5p, miR-1983, miR-3963, miR-299b-5p, miR-2447, miR-423-5p, miR-7705, miR-361-3p, novel\_111, novel\_82, miR-30d-3p, miR-328-3p, miR-210-3p, miR-95-3p, miR-217-5p, miR-30c-5p, miR-1961, miR-193b-5p, miR-133a-3p, miR-16-1-3p, miR-361-5p, miR-142-3p, novel\_73, miR-195a-3p, miR-345-3p, miR-329a-5p, miR-181b-1-3p, miR-142a-3p, miR-377-5p, miR-324-3p, miR-345-3p, miR-30b, miR-26a-5p, let-7k, miR-98-5p, miR-296-3p, miR-552-3p, miR-2331-3p, miR-548o-3p, let-7i-5p, miR-301a-3p, miR-30d-5p, miR-543-3p, miR-1827, miR-339b, miR-345-5p, miR-665-5p, let-7b, miR-129-2-3p, miR-3184-5p, miR-181c-5p, miR-6525, miR-346, miR-151-3p, miR-30a-3p, miR-665, miR-15b-3p, let-7f, miR-30e-3p, miR-129-5p, miR-454-3p, miR-874-5p, miR-4492, miR-339-5p, miR-149-5p, miR-3535, miR-2113, miR-27b-3p, miR-381-5p, miR-16-1-3p, miR-6240, miR-493-5p, let-7j, let-7a-2-3p, miR-432-3p, novel\_51, miR-2411-3p, miR-296-3p, miR-106b-3p, miR-193a-3p, miR-26b-5p, miR-3120-3p, novel\_68, miR-329-5p, miR-6535, miR-677, miR-181b-3p, miR-411b-3p, miR-3591-3p, miR-2319a, let-7e-5p, miR-412-3p, miR-193b-3p, miR-29c-3p, miR-376a-3p, miR-2284w, miR-301b-3p, novel\_87, miR-142b, miR-6123, miR-6119-3p, miR-29a, novel\_79, miR-429-3p, miR-2284z, miR-134-5p, miR-129-1-3p, novel\_121, miR-758-5p, miR-1343-5p, miR-23b-5p, miR-30c, miR-3064-5p, miR-200a, let-7g, miR-29a-5p, miR-30f, novel\_96, miR-200a-3p, let-7f-5p, miR-2355-5p, miR-542-5p, miR-2285aa, miR-1271, miR-133c, miR-200a-5p, miR-30e-5p, miR-329b, miR-345-5p, miR-2284v, miR-1260b, miR-1197-



miR-2330-5p, miR-23a-3p, miR-30c-1-3p, miR-4532, miR-8485, miR-2310, miR-362-3p, miR-29b-1-5p, miR-182-5p, miR-3955-3p, miR-153-3p, miR-199b-5p, miR-2300a-5p, miR-330-3p, miR-145b, miR-153, miR-126a-5p, miR-6529a, miR-329-3p, miR-484, miR-362-3p, miR-2426, miR-450b-5p, miR-101c, miR-3120-5p, miR-2447, miR-877-3p, miR-2440, miR-4792, miR-7689-3p, miR-7977, miR-652-3p, miR-199b-5p, miR-129b-5p, miR-105-3p, miR-29b-1-5p, miR-2424, miR-486-3p, miR-210-5p, miR-324-3p, miR-92a-1-5p, miR-760-3p, miR-30b-3p, miR-299-3p, miR-2484, miR-3960, miR-3600, miR-212-5p, miR-23b-3p, miR-23c, miR-671-3p, miR-193b-5p, miR-362-3p, miR-2904, miR-217-5p, novel\_73, miR-133a-3p, miR-4510, miR-346, miR-338-3p, miR-320e, novel\_74, miR-6516-3p, miR-208b-5p, miR-708-5p, miR-130b-5p, miR-30c-1-3p, miR-140-5p, miR-21-3p, miR-182-5p, miR-296-3p, miR-6516, miR-193b-3p, miR-6130, miR-216b-5p, miR-204-3p, miR-22-3p, miR-133b-3p, miR-130b-5p, miR-6240, miR-654-3p, miR-296-3p, miR-296-3p, miR-330-3p, miR-452-5p, miR-1343-5p, miR-193a-3p, miR-149-5p, miR-1434-3p, miR-22-3p, miR-197-3p, miR-145a-5p, miR-29b, miR-2889, miR-2284x, miR-376a-3p, miR-193b-3p, miR-29c-3p, miR-24-3p, miR-199b-5p, miR-1247-3p, miR-6402, miR-28c, miR-29a, miR-6123, novel\_68, miR-216b-3p, miR-320b, miR-146b-3p, miR-299b-3p, miR-29a-3p, miR-3591-3p, miR-2284e, miR-6516-3p, miR-181a-2-3p, miR-4286, miR-148b-5p, miR-28b, novel\_39, miR-199a-5p, miR-30c-2-3p, miR-3071-3p, miR-217, miR-299a-3p, miR-1224-5p, miR-505-5p, miR-6516-5p, miR-545-5p, miR-29d-3p, miR-1343-5p, miR-23b-5p, novel\_42, miR-133a-3p, miR-29b-3p, miR-331-3p, miR-486b-3p, miR-28-5p, miR-199a-5p, miR-488-3p, miR-200a-5p, miR-23b, miR-876-3p, novel\_91, miR-329a, miR-23a-5p, miR-7144-5p, miR-671-5p, miR-1814c

novel\_9, miR-134-5p, miR-592, miR-181c-3p, miR-28a-3p, miR-345-5p, miR-1248, miR-20b-5p, miR-301, miR-23b, miR-93-5p, miR-3959-5p, miR-25-3p, miR-331-5p, miR-874-3p, let-7f-5p, miR-127-5p, miR-28-3p, miR-125a-3p, miR-205-5p, miR-30f, miR-92b-3p, miR-450c-5p, novel\_39, miR-200a, let-7g, novel\_121, miR-134-5p, miR-429-3p, miR-206, miR-142b, miR-4324, miR-1839-3p, miR-378f, let-7e-5p, miR-3065-5p, miR-3970, miR-320c, miR-6535, miR-329-5p, miR-26b-5p, miR-378a-5p, miR-2411-3p, miR-105-5p, miR-32, miR-2285v, let-7a-2-3p, miR-380-5p, let-7f-2-3p, let-7f-2-3p, miR-188-5p, miR-27b-3p, miR-542-3p, miR-432, miR-708-3p, novel\_23, miR-197-3p, miR-3431, miR-134-3p, miR-3535, miR-130b-5p, miR-669a-3p, miR-1468-5p, miR-4492, let-7f, miR-2285j, miR-6525, miR-142a-5p, miR-181c-5p, miR-3184-3p, let-7b, miR-345-5p, miR-1827, miR-625-5p, miR-543-3p, miR-433-3p, miR-216b-5p, let-7i-5p, miR-2331-3p, miR-32-5p, miR-30c-1-3p, miR-216b-3p, miR-98-5p, miR-2484, let-7k, novel\_17, miR-26a-5p, miR-422a, miR-345-3p, miR-324-3p, miR-664b-3p, miR-143-3p, miR-329a-5p, miR-345-3p, miR-369-3p, novel\_73, miR-1961, miR-378i, miR-378a-3p, miR-23c, miR-23b-3p, miR-106a, miR-212-5p, miR-3968, miR-101-3p, miR-2440, novel\_82, novel\_111, miR-1285-5p, miR-363-3p, miR-2447, miR-181a-3p, miR-2483-3p, miR-378g, miR-25, miR-1185-2-3p, miR-4443, miR-211-5p, miR-2285u, miR-153-3p, miR-106b-5p, miR-323b-3p, miR-505, miR-378d, miR-101b-3p, miR-23a-3p, miR-1839-5p, miR-323b, miR-1a-3p, miR-142-5p, miR-539-5p, miR-147a, miR-153, miR-1185-3p, miR-455-3p, miR-1343-3p, miR-548w, novel\_78, miR-138-5p, miR-204-5p, miR-31-3p, miR-5100, miR-2332, miR-409-3p, miR-3969, miR-374a-3p, miR-500b-5p, miR-93, miR-145-3p, miR-378c, miR-1306-5p, miR-103b, miR-6128, miR-3607-3p, let-7g-3p, novel\_48, miR-2448-3p, miR-503-3p, miR-381-3p, miR-488-3p, miR-320a, miR-17-5p, miR-362-

miR-6119-3p, miR-576-3p, novel\_87, miR-2284w, miR-412-3p, miR-150-5p, miR-3591-3p, miR-299b-3p, miR-669, miR-677, miR-144-3p, miR-320c, miR-181b-3p, novel\_68, miR-329-5p, miR-216b-3p, miR-3120-3p, novel\_51, miR-2411-3p, miR-432-3p, miR-432-3p, miR-380-5p, miR-668-3p, miR-628-5p, miR-188-5p, miR-19b-2-5p, miR-542-3p, miR-2113, miR-412-5p, novel\_116, miR-103a-3p, miR-134-5p, miR-592, novel\_63, miR-6740-5p, miR-1260b, miR-144-5p, miR-345-5p, miR-1248, miR-301, miR-300-3p, miR-874-3p, miR-503-3p, miR-2285aa, miR-542-5p, miR-1271, miR-127-5p, novel\_127, miR-664-3p, miR-450b-5p, miR-29a-5p, novel\_39, miR-192-3p, miR-3064-5p, miR-1290, miR-1343-5p, miR-330-5p, miR-758-5p, miR-134-5p, miR-299a-3p, miR-6517, miR-1224-5p, miR-412, miR-18b-5p, miR-431, miR-3968, miR-628-3p, novel\_82, miR-301a-5p, miR-423-5p, miR-1285-5p, miR-2447, miR-3956-3p, miR-190b-5p, miR-504, miR-1983, miR-144-5p, miR-4443, miR-1185-2-3p, miR-2319b, miR-2285u, miR-211-5p, miR-431-5p, miR-323b-3p, miR-2310, miR-124a, miR-101b-3p, miR-744-3p, miR-101c, miR-2284r, miR-301b-5p, miR-323b, miR-758-3p, miR-147a, miR-455-3p, miR-1185-3p, miR-2459, miR-1343-3p, miR-145b, miR-181b-2-3p, novel\_74, miR-190a-5p, miR-500, miR-130b-5p, miR-2285j, miR-30e-3p, miR-30a-3p, miR-665, miR-3604, miR-6525, miR-224-5p, miR-3184-5p, miR-433-5p, miR-665-5p, miR-345-5p, miR-543-3p, miR-1827, miR-186-5p, miR-2285c, miR-500a-3p, miR-10a, miR-216b-5p, miR-504-5p, miR-2331-3p, miR-30c-1-3p, novel\_17, miR-324-3p, miR-219b-5p, miR-345-3p, miR-664b-3p, miR-181b-1-3p, miR-143-3p, miR-329a-5p, miR-345-3p, miR-33b-3p, miR-218-1-3p, miR-34a-5p, miR-2366, miR-328-3p, miR-18a-3p, miR-30d-3p, miR-212-5p, miR-22-5p, miR-502b, miR-147-5p, miR-34c, miR-211, miR-3959-3p, miR-24-3p, miR-326-3p, miR-449a, miR-542-5p, novel\_101, miR-1291, miR-107, miR-6395, miR-135b-5p, miR-

miR-4492, miR-874-5p, miR-29b-2-5p, miR-324-3p, miR-2285j, miR-181c-5p, miR-6525, miR-3074-2-3p, miR-2330-3p, miR-3074-5p, miR-186-5p, miR-885-3p, miR-625-5p, miR-30f, miR-154b-3p, miR-339b, miR-2312, miR-129b-3p, miR-2285c, miR-877-5p, miR-193b-3p, miR-499b-3p, miR-532-5p, miR-182-5p, miR-552-3p, miR-154a-3p, miR-3065-3p, miR-548o-3p, miR-221-5p, miR-30c-1-3p, miR-221-5p, miR-30b-3p, miR-466i-5p, miR-760-3p, miR-185-3p, miR-125b, novel\_17, miR-210-5p, miR-30b, miR-486-3p, miR-2432, miR-142a-3p, miR-487a, miR-2285w, miR-216c-5p, miR-378d, miR-33b-3p, miR-19b-3p, miR-2904, miR-362-3p, miR-2300b-3p, miR-193b-5p, novel\_133, miR-30c-5p, miR-2284h-5p, miR-487a-3p, miR-7859, miR-485-3p, miR-548e-3p, miR-154-3p, miR-335, miR-2285y, miR-30b-5p, miR-218-5p, miR-7705, miR-877-3p, miR-452-5p, miR-181d-5p, miR-2285f, miR-3956-3p, novel\_60, miR-3059-5p, novel\_94, miR-544-5p, miR-1983, miR-877-3p, miR-99b-5p, miR-381-3p, miR-129b-5p, miR-3082-5p, miR-378g, miR-499a-3p, miR-7689-3p, miR-2285u, miR-24-1-5p, miR-491-5p, miR-1185-5p, miR-182-5p, miR-362-3p, miR-431-5p, miR-342, miR-758-3p, miR-2310, miR-1b-5p, miR-8485, miR-3187-3p, miR-30c-1-3p, miR-2284b, miR-362-3p, miR-758-3p, miR-412-3p, miR-329-3p, miR-6529a, miR-2285e, miR-2459, miR-9788-3p, miR-142-3p, miR-1298-3p, miR-147a, miR-548w, novel\_4, miR-486b-3p, miR-331-5p, miR-138-5p, miR-125b-5p, miR-6740-5p, miR-410-5p, miR-29b-3p, miR-671-5p, miR-1814c, miR-23a-5p, miR-3074-1-3p, miR-329a, let-7g-3p, miR-876-3p, miR-100-5p, miR-331-5p, miR-381-3p, miR-365a-3p, miR-331-5p, miR-125a, miR-370-3p, miR-2355-5p, miR-2285aa, miR-574-5p, miR-487a-3p, novel\_96, miR-181b-5p, miR-191-3p, miR-2898, miR-339a, miR-30c-2-3p, miR-99a, miR-125a-3p, miR-6119-5p, miR-2285af, miR-205-5p, miR-2284a, miR-1271-3p, miR-3065-3p, miR-24-2-5p, miR-29b-2-5p, miR-99a-5p, miR-30c, miR-

TCHH ENSOARGO(trichohy) miR-221-5p, miR-660-5p, miR-21-3p, miR-192-5p, miR-301a-3p, miR-656-3p, miR-155-5p, miR-433-3p, miR-625-5p, miR-543-3p, miR-186-5p, miR-3074-5p, miR-181c-5p, novel\_74, miR-155-5p, miR-6516-3p, miR-129-5p, miR-454-3p, miR-548e-3p, miR-7859, miR-215-5p, miR-5703, miR-188-3p, miR-4429, miR-142-3p, miR-10a-3p, miR-216c-5p, miR-195a-3p, miR-664b-3p, miR-143-3p, miR-216a-5p, miR-345-3p, miR-2284m, miR-320d, miR-221-5p, miR-30b-3p, miR-21-3p, miR-541-5p, miR-211-5p, miR-378g, miR-140-5p, miR-129b-5p, novel\_60, miR-3956-3p, miR-181d-5p, miR-2284j, miR-8095, miR-2285t, miR-105-1, miR-1343-3p, miR-330-3p, miR-147a, miR-455-3p, miR-126a-5p, miR-4791, miR-323b, miR-30b-3p, miR-3962, miR-1388-5p, miR-2284aa, miR-2330-5p, miR-320b, miR-323b-3p, miR-130b-3p, miR-3955-3p, miR-3957-5p, miR-215-5p, miR-3957, miR-301, miR-320a, miR-3154, miR-10a-3p, miR-365a-5p, miR-410-5p, miR-2284k, miR-6740-5p, miR-135a-5p, miR-3969, novel\_9, miR-204-5p, miR-134-5p, miR-7641, miR-302a-5p, miR-134-5p, miR-2284z, novel\_121, miR-345-3p, miR-196a-5p, miR-134, miR-155-5p, miR-105-2, novel\_39, miR-490-3p, miR-127-5p, miR-181b-5p, miR-107, novel\_68, miR-3074-5p, miR-320c, miR-376b-5p, miR-3591-3p, miR-107, miR-135b-5p, miR-6516-3p, miR-211, novel\_27, miR-301b-3p, miR-2428, miR-2284w, miR-128-1-5p, miR-203b-5p, miR-103a-3p, miR-130a-3p, miR-432-5p, miR-3535, miR-134-3p, miR-2355-3p, miR-103, miR-432, miR-223-3p, miR-181a-5p, miR-1434-3p, miR-3071-5p, miR-30b-3p, miR-3432b, miR-219a-1-3p, miR-2284x, miR-6240, miR-382, miR-363-5p, miR-432-3p, miR-432-3p, miR-365b-5p, miR-330-3p, miR-105-5p, miR-2411-3p, miR-124-5p, miR-196b-5p

miR-1224-5p, miR-18b-5p, miR-6517, miR-429-3p, miR-30a-5p, miR-345-3p, miR-105-2, miR-30c, let-7d, let-7g, novel\_39, miR-2478, miR-30c-2-3p, let-7c-5p, miR-217, miR-2285af, miR-664-3p, miR-200c, miR-107, miR-1a-2-5p, miR-181b-5p, let-7f-5p, miR-6536, miR-200c-3p, miR-370-3p, miR-2355-5p, miR-2285aa, miR-34c-5p, miR-365a-3p, miR-18a, miR-23b, miR-30e-5p, miR-301, miR-2318, miR-3607-3p, miR-2284v, miR-323-3p, miR-374a-3p, miR-410-5p, novel\_63, miR-2284k, miR-1-5p, miR-135a-1-3p, miR-31-3p, miR-374b-3p, miR-103a-3p, miR-103, miR-2284d, miR-185-5p, let-7g-5p, miR-22-3p, miR-542-3p, miR-223-3p, miR-181a-5p, miR-455-5p, miR-2284x, miR-382, miR-6240, miR-654-3p, miR-2284l, miR-105-5p, miR-330-3p, miR-2411-3p, miR-455-5p, miR-224-5p, miR-3120-3p, miR-7-1-3p, miR-34b, miR-670-3p, miR-3065-5p, miR-18b, miR-6395, let-7e-5p, miR-505-3p, miR-1291, miR-107, miR-2285x, miR-1a-1-5p, miR-449a, miR-323c, miR-34c, let-7i, miR-6402, miR-142b, miR-3600, miR-505-3p, miR-328-3p, miR-23b-3p, miR-23c, miR-2904, miR-217-5p, miR-30c-5p, miR-1961, miR-2300b-3p, miR-664-5p, miR-218-1-3p, miR-34a-5p, miR-345-3p, miR-2424, miR-500a-5p, miR-219b-5p, miR-216a-5p, miR-345-3p, miR-30b, miR-34b-5p, let-7k, miR-2484, miR-2284m, miR-98-5p, miR-216b-3p, miR-2331-3p, miR-30c-1-3p, miR-545-3p, miR-22-3p, novel\_32, let-7i-5p, miR-216b-5p, miR-21a-3p, miR-543-3p, miR-625-5p, miR-1827, novel\_99, miR-30f, miR-18a-5p, miR-539-5p, let-7b, let-7b-5p, miR-181c-5p, miR-224-5p, miR-664a-5p, miR-3604, let-7f, miR-2285j, novel\_74, miR-105-1, miR-330-3p, miR-548w, miR-758-3p, miR-6529a, miR-296-5p, miR-2284r, miR-1388-5p, miR-23a-3p, miR-744-3p, let-7a-5p, miR-1b-5p, miR-758-3p, miR-30c-1-3p, miR-505, let-7e, miR-10b, let-7d-5p, miR-7857-3p, miR-2483-3p, novel\_94, miR-181d-5p, miR-212-3p, miR-1285-5p, miR-877-3p, miR-30b-5p, miR-374a-3p, miR-6516-3p, miR-216b-3p, miR-485-3p, miR-139-5p, miR-6240, miR-539-3p, miR-200a, miR-27a-5p, miR-487a-3p, miR-378g, miR-323c, miR-134-3p, miR-139-5p, miR-2284k, miR-30e-3p, miR-30a-3p, miR-664a-5p, miR-409-3p, miR-3604, miR-142a-5p, miR-206-3p, miR-224-5p, miR-6134, miR-6128, miR-3074-2-3p, miR-2330-3p, miR-154b-3p, miR-133c, miR-2284n, miR-2331-3p, miR-32-3p, miR-2285aa, miR-154a-3p, miR-2284m, miR-2898, miR-152-3p, miR-664-3p, miR-148b-5p, miR-130a-5p, miR-200a, miR-1, miR-30a-3p, miR-2385-3p, miR-345-3p, miR-193b-5p, miR-140-3p, miR-1434-5p, miR-7859, miR-23b-3p, miR-383-5p, miR-302a-5p, miR-23c, miR-148b-3p, miR-545-5p, miR-2284z, miR-6517, miR-7641, miR-376a-5p, miR-30d-3p, miR-628-3p, miR-206, miR-154-3p, novel\_27, miR-8095, miR-32-3p, miR-219a-5p, miR-2284j, miR-299b-5p, miR-376a-2-5p, miR-148a-3p, miR-150-5p, miR-1306, miR-2483-3p, miR-27a-3p, miR-664b, miR-378b, miR-541-5p, miR-224-5p, miR-1306-5p, miR-8485, miR-382-3p, miR-23a-3p, miR-2284ab, miR-299a-5p, miR-2284aa, miR-2284x, miR-27b-3p, miR-1434-3p, miR-1a-3p, miR-3071-5p, miR-145a-5p, miR-2284d, miR-142-5p, miR-2320-3p, miR-145b, miR-27a-3p, miR-592, miR-409-3p, miR-503-3p, novel\_63, miR-2285j, miR-218-5p, novel\_121, miR-2284w, miR-489, miR-3082-5p, miR-2285r, miR-2285u, miR-212-3p

MAPK1IP1I ENSOARGO(mitogen-5p, miR-449a, miR-323c, miR-34c, let-7i, miR-6402, miR-142b, miR-3600, miR-505-3p, miR-328-3p, miR-23b-3p, miR-23c, miR-2904, miR-217-5p, miR-30c-5p, miR-1961, miR-2300b-3p, miR-664-5p, miR-218-1-3p, miR-34a-5p, miR-345-3p, miR-2424, miR-500a-5p, miR-219b-5p, miR-216a-5p, miR-345-3p, miR-30b, miR-34b-5p, let-7k, miR-2484, miR-2284m, miR-98-5p, miR-216b-3p, miR-2331-3p, miR-30c-1-3p, miR-545-3p, miR-22-3p, novel\_32, let-7i-5p, miR-216b-5p, miR-21a-3p, miR-543-3p, miR-625-5p, miR-1827, novel\_99, miR-30f, miR-18a-5p, miR-539-5p, let-7b, let-7b-5p, miR-181c-5p, miR-224-5p, miR-664a-5p, miR-3604, let-7f, miR-2285j, novel\_74, miR-105-1, miR-330-3p, miR-548w, miR-758-3p, miR-6529a, miR-296-5p, miR-2284r, miR-1388-5p, miR-23a-3p, miR-744-3p, let-7a-5p, miR-1b-5p, miR-758-3p, miR-30c-1-3p, miR-505, let-7e, miR-10b, let-7d-5p, miR-7857-3p, miR-2483-3p, novel\_94, miR-181d-5p, miR-212-3p, miR-1285-5p, miR-877-3p, miR-30b-5p, miR-374a-3p, miR-6516-3p, miR-216b-3p, miR-485-3p, miR-139-5p, miR-6240, miR-539-3p, miR-200a, miR-27a-5p, miR-487a-3p, miR-378g, miR-323c, miR-134-3p, miR-139-5p

TBPL2 ENSOARGO(TATA box 6240, miR-539-3p, miR-200a, miR-27a-5p, miR-487a-3p, miR-378g, miR-323c, miR-134-3p, miR-139-5p, miR-2284k, miR-30e-3p, miR-30a-3p, miR-664a-5p, miR-409-3p, miR-3604, miR-142a-5p, miR-206-3p, miR-224-5p, miR-6134, miR-6128, miR-3074-2-3p, miR-2330-3p, miR-154b-3p, miR-133c, miR-2284n, miR-2331-3p, miR-32-3p, miR-2285aa, miR-154a-3p, miR-2284m, miR-2898, miR-152-3p, miR-664-3p, miR-148b-5p, miR-130a-5p, miR-200a, miR-1, miR-30a-3p, miR-2385-3p, miR-345-3p, miR-193b-5p, miR-140-3p, miR-1434-5p, miR-7859, miR-23b-3p, miR-383-5p, miR-302a-5p, miR-23c, miR-148b-3p, miR-545-5p, miR-2284z, miR-6517, miR-7641, miR-376a-5p, miR-30d-3p, miR-628-3p, miR-206, miR-154-3p, novel\_27, miR-8095, miR-32-3p, miR-219a-5p, miR-2284j, miR-299b-5p, miR-376a-2-5p, miR-148a-3p, miR-150-5p, miR-1306, miR-2483-3p, miR-27a-3p, miR-664b, miR-378b, miR-541-5p, miR-224-5p, miR-1306-5p, miR-8485, miR-382-3p, miR-23a-3p, miR-2284ab, miR-299a-5p, miR-2284aa, miR-2284x, miR-27b-3p, miR-1434-3p, miR-1a-3p, miR-3071-5p, miR-145a-5p, miR-2284d, miR-142-5p, miR-2320-3p, miR-145b, miR-27a-3p

OTX2 ENSOARGO(orthoden 545-5p, miR-2284z, miR-6517, miR-7641, miR-376a-5p, miR-30d-3p, miR-628-3p, miR-206, miR-154-3p, novel\_27, miR-8095, miR-32-3p, miR-219a-5p, miR-2284j, miR-299b-5p, miR-376a-2-5p, miR-148a-3p, miR-150-5p, miR-1306, miR-2483-3p, miR-27a-3p, miR-664b, miR-378b, miR-541-5p, miR-224-5p, miR-1306-5p, miR-8485, miR-382-3p, miR-23a-3p, miR-2284ab, miR-299a-5p, miR-2284aa, miR-2284x, miR-27b-3p, miR-1434-3p, miR-1a-3p, miR-3071-5p, miR-145a-5p, miR-2284d, miR-142-5p, miR-2320-3p, miR-145b, miR-27a-3p

EXOC5 ENSOARGO(exocyst 545-5p, novel\_121, miR-2284w, miR-489, miR-3082-5p, miR-2285r, miR-2285u, miR-212-3p

miR-150-5p, miR-1306, miR-378b, miR-21c, miR-2285ab, miR-376b-5p, miR-2387, miR-2319a, miR-378f, miR-6395, miR-135b-5p, miR-412-3p, miR-26b-5p, miR-7-1-3p, miR-3120-3p, novel\_68, miR-378b, miR-6535, miR-677, miR-181b-3p, miR-2404, miR-323a-5p, miR-670-3p, miR-411b-3p, novel\_69, miR-22-5p, miR-17-3p, miR-542-5p, miR-219b-3p, miR-301b-3p, miR-3959-3p, miR-3071-5p, miR-145a-5p, miR-432, miR-223-3p, miR-26a-2-3p, miR-27b-3p, miR-21-5p, miR-339-5p, miR-130a-3p, miR-26b-3p, miR-122-3p, miR-149-5p, miR-412-5p, miR-432-5p, miR-2285g, miR-330-3p, miR-105-5p, miR-224-5p, miR-125a-5p, miR-378a-5p, let-7f-2-3p, let-7f-2-3p, miR-130b-5p, miR-380-5p, miR-6240, miR-539-3p, let-7a-2-3p, miR-2285r, miR-2448-3p, miR-7144-5p, miR-485-5p, let-7g-3p, miR-2355-5p, miR-615-5p, miR-125a, miR-487a-3p, miR-223-5p, miR-365a-3p, miR-3965, miR-100-3p, miR-125b-5p, miR-135a-5p, miR-409-3p, miR-494-5p, miR-5100, miR-6128, miR-378c, miR-218-2-3p, miR-23b-5p, miR-105-2, let-7a-2-3p, novel\_79, miR-7641, miR-412, miR-486-5p, miR-302a-5p, miR-378h, miR-30c-2-3p, miR-339a, miR-2285af, miR-200c, miR-543-5p, miR-17-3p, miR-200c-3p, miR-181a-2-3p, miR-148b-5p, miR-380-5p, miR-24-2-5p, miR-335-3p, novel\_94, miR-1983, miR-147-3p, miR-504, miR-136-5p, miR-139-5p, miR-24-1-5p, miR-20a-3p, miR-203-3p, miR-1185-2-3p, miR-27a-3p, miR-25, miR-499a-3p, miR-378e, miR-2483-3p, miR-382-3p, miR-2440, miR-2284q, miR-154-3p, miR-2285f, miR-3059-5p, novel\_60, miR-212-3p, miR-3956-3p, miR-7705, miR-154a, miR-877-3p, miR-412-3p, miR-125b-2-3p, miR-2284r, miR-6529a, miR-378b, miR-378c, miR-2426, miR-450b-5p, miR-5010-3p, miR-145b, miR-27a-3p, miR-181b-2-3p, miR-330-3p, miR-105-1, miR-1343-3p, miR-548w, miR-148b-5p, miR-455-3p, miR-1185-3p, miR-2285e, miR-153, miR-142-3p, miR-539-5p, miR-2320-3p, miR-1298-3p, miR-29b-1-5p, miR-2957, miR-182-5p, miR-1306-5p, novel\_103, miR-

miR-125a, miR-542-5p, miR-2285aa, miR-25-3p, miR-376c-5p, miR-93-5p, miR-329a, miR-876-3p, miR-1248, miR-20b-5p, miR-181c-3p, miR-2284k, miR-100-3p, miR-125b-5p, miR-191-5p, miR-134-5p, miR-126b-3p, miR-299a-3p, miR-2285ad, miR-431, miR-134-5p, miR-2284z, miR-196a-5p, miR-1343-5p, miR-155-5p, miR-92b-3p, let-7g, miR-2284y, novel\_39, miR-664-3p, miR-30f, let-7f-5p, miR-152-3p, miR-3120-3p, miR-299b-3p, miR-144-3p, miR-6535, miR-148a-3p, miR-1306, let-7e-5p, miR-146b-5p, miR-335-5p, miR-29c-3p, miR-301b-3p, miR-576-3p, miR-142b, miR-4324, novel\_87, miR-206, miR-29a, miR-625-3p, miR-31-5p, miR-3431, novel\_116, miR-1843b-5p, miR-2113, miR-16-1-3p, miR-2284x, miR-6240, let-7f-2-3p, let-7f-2-3p, miR-432-3p, miR-432-3p, miR-2285r, let-7a-2-3p, miR-146a, miR-377-3p, miR-194a, miR-32, miR-196b-5p, miR-32-5p, miR-154a-3p, miR-301a-3p, miR-377-3p, let-7i-5p, miR-433-3p, miR-500a-3p, miR-625-5p, miR-3184-3p, miR-590-3p, let-7b, miR-214, miR-6525, miR-769-5p, miR-181c-5p, let-7f, miR-2285j, miR-665, novel\_74, miR-669a-3p, miR-500, miR-454-3p, miR-106a, miR-7859, miR-2284h-5p, miR-1961, miR-191, miR-1434-5p, miR-217-5p, novel\_73, miR-2284u, miR-148a-5p, miR-34a-5p, miR-16-1-3p, miR-142a-3p, miR-376a-5p, miR-486-3p, miR-2285p, miR-210-5p, miR-98-5p, let-7k, miR-2284g, miR-211-5p, miR-7689-3p, miR-2483-3p, miR-25, miR-500-3p, miR-1185-2-3p, miR-140-5p, miR-181a-3p, miR-363-3p, miR-3956-3p, miR-2284j, miR-1285-5p, miR-101-3p, miR-218-5p, miR-301a-5p, miR-628-3p, miR-154-3p, miR-490-5p, novel\_78, miR-548w, miR-330-3p, miR-1343-3p, miR-145b, miR-147a, miR-2459, miR-421, miR-148b-5p, miR-301b-5p, miR-329-3p, miR-758-3p, miR-323b, miR-1a-3p, miR-501-3p, miR-362-3p, miR-101c, miR-21b, miR-124a, miR-2284b, miR-8485, miR-431-5p, miR-199a-3p, miR-106b-5p, miR-29b-1-5p, miR-505, miR-323b-3p, miR-130b-3p, miR-1185-5p, miR-214-3p, miR-146b, miR-



miR-425-5p, miR-3074-5p, miR-539-5p, miR-590-3p, miR-181c-5p, miR-224-5p, miR-129-5p, miR-155-5p, miR-182-5p, miR-21-3p, miR-3065-3p, miR-155-5p, novel\_25, miR-376e-3p, miR-2285c, miR-21a-3p, miR-186-5p, miR-2312, let-7g-3p, miR-376c-3p, miR-125b-2-3p, miR-376a-5p, miR-345-3p, miR-2284m, miR-320d, miR-30d-3p, miR-3600, miR-200b, miR-148b-3p, miR-217-5p, miR-5703, miR-133a-3p, miR-4429, miR-181d-5p, miR-190b-5p, miR-2284j, miR-2285f, miR-3964, miR-20a-3p, miR-27a-3p, miR-2483-3p, miR-25, miR-9-3p, miR-33a-5p, miR-1b-5p, miR-182-5p, miR-505, novel\_115, miR-320b, miR-153-3p, miR-3955-3p, miR-27a-3p, miR-181b-2-3p, miR-2285e, miR-9788-3p, miR-455-3p, miR-216a-3p, miR-153, miR-30b-3p, miR-484, miR-3120-5p, miR-2284aa, miR-101c, miR-21b, miR-2426, miR-103b, miR-3607-3p, miR-2284v, miR-323-3p, miR-409-3p, miR-2284k, miR-34c-3p, miR-134-5p, miR-141-3p, miR-3956, miR-503-3p, miR-376c-3p, miR-374c-3p, miR-3154, miR-320a, miR-137-3p, miR-301, miR-671-5p, let-7g-3p, miR-10b-3p, miR-192-3p, novel\_39, miR-200a, miR-29a-5p, miR-3065-3p, miR-450b-5p, miR-217, miR-30f, miR-200c, miR-200a-3p, miR-152-3p, miR-181b-5p, miR-200c-3p, miR-429-3p, miR-545-5p, miR-134-5p, miR-2284z, miR-134, miR-1290, miR-345-3p, let-7a-2-3p, miR-155-5p, miR-200b-3p, miR-582-3p, miR-2285x, novel\_120, miR-2428, miR-323c, miR-6402, miR-147-5p, novel\_1, miR-378b, miR-3074-5p, miR-216b-3p, miR-677, miR-320c, miR-3591-3p, miR-3065-5p, miR-148a-3p, miR-2285ab, miR-6516-3p, miR-7975, let-7a-2-3p, miR-432-3p, miR-2284l, miR-432-3p, miR-2411-3p, miR-224-5p, miR-31-5p, miR-2355-3p, miR-2284d, miR-2285g, miR-3071-5p, miR-1434-3p, miR-1285, miR-181a-5p, miR-653, miR-27b-3p, miR-2284x, miR-219a-1-3p, miR-2284ab, miR-30b-3p

miR-2284y, novel\_39, miR-2284a, miR-3529-3p, miR-30a-3p, miR-17-3p, miR-181b-5p, miR-127-5p, miR-543-5p, miR-322-5p, miR-758-5p, miR-6516-5p, miR-582-3p, miR-134-5p, miR-2284z, miR-129-1-3p, miR-496, miR-345-3p, miR-134, miR-29d-3p, miR-218-2-3p, miR-330-5p, miR-93, miR-2284v, miR-6128, miR-16-5p, miR-3607-3p, miR-486b-3p, miR-134-5p, miR-34c-3p, miR-2284k, miR-29b-3p, miR-3969, miR-409-3p, miR-376c-3p, miR-2284n, miR-10b-3p, miR-345-5p, miR-20b-5p, novel\_48, miR-671-5p, miR-93-5p, miR-17-5p, miR-23b, miR-320a, miR-3154, miR-432-3p, miR-432-3p, miR-2284l, miR-345-5p, miR-6240, miR-224-5p, miR-377-3p, miR-190a, miR-330-3p, miR-17-5p, miR-106a-5p, miR-2411-3p, miR-2284d, miR-134-3p, miR-185-5p, miR-20b, miR-29b, miR-30b-3p, miR-2284ab, miR-16b, miR-497-5p, miR-2284x, miR-1434-3p, miR-1285, miR-181a-5p, miR-223-3p, miR-3071-5p, miR-326-3p, novel\_27, miR-2428, miR-17-3p, miR-29c-3p, miR-495-3p, miR-29a, miR-147-5p, miR-15a, miR-4324, miR-20a-5p, miR-142b, miR-16a, miR-29a-3p, miR-677, miR-181b-3p, miR-6516-3p, miR-505-3p, miR-195a-5p, miR-3065-5p, miR-664b-3p, miR-376c-3p, miR-125b-2-3p, miR-181b-1-3p, miR-486-3p, miR-20a, miR-2284m, miR-106a, miR-30b-3p, miR-2484, miR-3601, miR-345-3p, miR-23b-3p, miR-222-5p, miR-15a-5p, miR-23c, miR-151-5p, miR-106a, miR-30d-3p, miR-505-3p, novel\_73, miR-4429, miR-2284u, miR-1246, miR-2366, miR-124-3p, miR-5703, miR-6525, miR-224-5p, miR-539-5p, miR-129-2-3p, miR-425-5p, miR-6516-3p, miR-17-3p, miR-190a-5p, miR-208b-5p, miR-424-5p, miR-4492, miR-30e-3p, miR-30a-3p, miR-320e, miR-665, miR-377-3p, miR-376e-3p, novel\_25, miR-204-3p, miR-151b, miR-877-5p, miR-15b-5p, miR-504-5p, miR-545-3p, miR-496-3p, miR-345-5p, miR-543-3p, miR-186-5p, miR-450a-1-3p, miR-27b-5p, miR-1388-3p, miR-124a, miR-106a-5p, miR-424-5p, miR-23a-3p, miR-320b, miR-326, miR-323b-3p, miR-106b-5p, miR-147a, miR-0788-3p, miR-155, miR-23b, miR-433-3p, miR-378b, miR-1306, let-7g-3p, miR-147-3p, miR-582-5p, novel\_68, miR-365a-3p, miR-582-5p, miR-301a-3p, novel\_82, miR-6516-3p, novel\_74, miR-454-3p, miR-22-5p, miR-3956-3p, novel\_60, miR-6128, miR-877-3p, miR-301b-3p, miR-432, miR-1197-5p, let-7a-2-3p, miR-548e-3p, miR-3600, miR-130a-3p, miR-23c, miR-23b-3p, miR-432-5p, miR-7859, miR-149-5p, miR-1306-5p, miR-130b-3p, miR-23a-3p, miR-654-3p, miR-143-3p, let-7a-2-3p, miR-2432, miR-2424, miR-582-3p, miR-1827, miR-299, miR-873a-5p, miR-301b-5p, miR-129b-3p, miR-487a-3p, miR-378g, miR-134-3p, miR-485-3p, miR-543-5p, miR-103a-2-5p, miR-2332, miR-107-5p, miR-301a-5p, miR-539-3p, miR-181a-2-3p, miR-628-5p, miR-3591-3p, miR-3071-5p, miR-1434-5p, miR-1246, miR-493-5p, miR-155-5p, miR-493-3p, miR-21-3p, miR-216b-3p, miR-548e-3p, miR-2300a-5p, miR-155-5p, miR-154b-5p, miR-7859, miR-107-5p, miR-382-3p, miR-196a-3p, miR-3964, miR-3653-3p, miR-486b-3p, miR-103a-2-5p, miR-378a-5p, miR-155-5p, miR-2330-3p, miR-493-5p, novel\_39, miR-486-3p, miR-8485, miR-6525

PCNXL4 ENSOARGO(pecanex-

DHRS7 ENSOARGO( dehydrog

MNAT1 ENSOARGO( MNAT CDK

MTHFD1 ENSOARGO( methylen

|        |                    |                                                                                                                                                                                                                                                                                                                                                                                                                                                                                                                                                                                                                                                                                                                                                                                                                                                                                                                                                                                                                                                                                                                                                                                                                                                                                                                                                                                                                                                                                                                                                                                                                                                                                                                                                                                                                                                                                                                            |
|--------|--------------------|----------------------------------------------------------------------------------------------------------------------------------------------------------------------------------------------------------------------------------------------------------------------------------------------------------------------------------------------------------------------------------------------------------------------------------------------------------------------------------------------------------------------------------------------------------------------------------------------------------------------------------------------------------------------------------------------------------------------------------------------------------------------------------------------------------------------------------------------------------------------------------------------------------------------------------------------------------------------------------------------------------------------------------------------------------------------------------------------------------------------------------------------------------------------------------------------------------------------------------------------------------------------------------------------------------------------------------------------------------------------------------------------------------------------------------------------------------------------------------------------------------------------------------------------------------------------------------------------------------------------------------------------------------------------------------------------------------------------------------------------------------------------------------------------------------------------------------------------------------------------------------------------------------------------------|
| CHURC1 | ENSOARGO(churchil) | miR-27a-3p, miR-144-5p, miR-374c-3p, miR-670-3p, miR-3082-5p, miR-139-5p, miR-34b, miR-374c-3p, miR-34c-5p, novel_68, miR-139-5p, miR-574-5p, novel_48, miR-18a-5p, miR-18a, miR-18b, miR-1285-5p, miR-449a, miR-144-5p, miR-208b-5p, miR-490-5p, miR-3969, miR-34c, miR-2440, miR-2355-3p, miR-194-3p, miR-18b-5p, miR-145b, miR-27a-3p, miR-212-5p, miR-105-1, miR-34a-5p, miR-27b-3p, miR-26a-2-3p, novel_73, miR-140-3p, miR-145a-5p, miR-758-3p, miR-125b-2-3p, miR-758-3p, miR-2424, miR-628-5p, miR-34b-5p, miR-202-5p, miR-505, miR-216a-5p, miR-105-5p, miR-197-5p, miR-9788-3p, miR-2284z, miR-335-5p, miR-378d, miR-2284aa, novel_9, miR-335, miR-137-3p, miR-324-3p, miR-218-2-3p, miR-2300b-3p, miR-488-3p                                                                                                                                                                                                                                                                                                                                                                                                                                                                                                                                                                                                                                                                                                                                                                                                                                                                                                                                                                                                                                                                                                                                                                                                    |
| MAX    | ENSOARGO(MYC asso) | miR-378h, miR-378e, miR-302a-5p, novel_116, miR-429-3p, miR-2319b, miR-378a-3p, miR-2285aa, miR-5010-3p, miR-299a-5p, miR-378c, miR-378f, miR-2387, miR-378b, miR-378i, miR-188-3p, miR-378a-3p, miR-378d, miR-378c, miR-378c, miR-200c-3p, miR-422a, miR-378i, miR-378a-3p, miR-188-3p, miR-664-5p, miR-548e-3p, miR-18a-3p, miR-106a, miR-505-3p, miR-200b, miR-210-5p, miR-219b-5p, miR-422a, miR-106a, miR-760-3p, miR-466i-5p, miR-20a, miR-345-3p, miR-29b-1-5p, miR-125b-2-3p, miR-2432, let-7g-3p, miR-885-3p, miR-504-5p, miR-378a-3p, miR-496-3p, miR-182-5p, miR-377-3p, miR-10a, miR-204-3p, miR-22-3p, miR-15b-3p, miR-29b-2-5p, miR-664a, miR-708-5p, miR-1468-5p, miR-378c, miR-129-2-3p, miR-10b-5p, miR-142a-5p, miR-346, miR-224-5p, miR-484, miR-378b, miR-10b, miR-378c, miR-2284aa, miR-3120-5p, miR-548w, miR-2300a-5p, miR-147a, miR-142-5p, miR-1185-3p, miR-29b-1-5p, miR-106b-5p, miR-182-5p, miR-3955-3p, miR-1468, miR-103a-2-5p, miR-106a-5p, miR-2330-5p, miR-378d, miR-193a, miR-361-3p, miR-129b-5p, miR-381-3p, miR-504, novel_94, miR-10b, miR-7977, miR-378e, miR-3082-5p, miR-203-3p, miR-1185-2-3p, miR-101-3p, miR-107-5p, miR-2447, miR-361-3p, miR-7705, miR-885-3p, miR-200b-3p, let-7a-2-3p, miR-496, miR-10a-5p, miR-429-3p, miR-378h, miR-2284z, miR-486-5p, miR-129-1-3p, miR-200c, miR-200c-3p, novel_127, miR-29b-2-5p, miR-29a-5p, miR-93-5p, miR-17-5p, let-7g-3p, miR-7144-5p, miR-20b-5p, novel_48, miR-1248, miR-574-5p, miR-503-3p, miR-874-3p, miR-133c, miR-2332, miR-28-5p, miR-93, miR-378c, miR-873a-5p, miR-22-3p, novel_23, miR-20b, miR-224-5p, miR-377-3p, novel_51, miR-17-5p, miR-106a-5p, miR-101-5p, let-7f-2-3p, let-7f-2-3p, miR-654-3p, let-7a-2-3p, miR-150-5p, miR-3065-5p, miR-378b, miR-18a-3p, miR-450b-3p, miR-2319a, miR-505-3p, miR-379-5p, miR-378f, miR-378b, miR-10a-5p, miR-411b-3p, miR-4324, miR-20a-5p, miR-502b, novel_101, miR-2284w |
| EIF2S1 | ENSOARGO(eukaryot) |                                                                                                                                                                                                                                                                                                                                                                                                                                                                                                                                                                                                                                                                                                                                                                                                                                                                                                                                                                                                                                                                                                                                                                                                                                                                                                                                                                                                                                                                                                                                                                                                                                                                                                                                                                                                                                                                                                                            |
| PIGH   | ENSOARGO(phosphat) |                                                                                                                                                                                                                                                                                                                                                                                                                                                                                                                                                                                                                                                                                                                                                                                                                                                                                                                                                                                                                                                                                                                                                                                                                                                                                                                                                                                                                                                                                                                                                                                                                                                                                                                                                                                                                                                                                                                            |

|       |                   |                                                                                                                                                                                                                                                                                                                                                                                                                                                                                                                                                                                                                                                                                                                                                                                                                                                                                                                                                                                                                                                                                                                                                                                                                                                                                                                                                                                                                                                                                                                                                                                                                                                                                             |
|-------|-------------------|---------------------------------------------------------------------------------------------------------------------------------------------------------------------------------------------------------------------------------------------------------------------------------------------------------------------------------------------------------------------------------------------------------------------------------------------------------------------------------------------------------------------------------------------------------------------------------------------------------------------------------------------------------------------------------------------------------------------------------------------------------------------------------------------------------------------------------------------------------------------------------------------------------------------------------------------------------------------------------------------------------------------------------------------------------------------------------------------------------------------------------------------------------------------------------------------------------------------------------------------------------------------------------------------------------------------------------------------------------------------------------------------------------------------------------------------------------------------------------------------------------------------------------------------------------------------------------------------------------------------------------------------------------------------------------------------|
| ARG2  | ENSOARGO(arginase | <p>miR-421-5p, miR-363-5p, miR-668-3p, miR-181a-2-3p, miR-124a, miR-101b-3p, miR-2898, miR-760-3p, miR-7-5p, miR-2459, miR-505-3p, novel_78, miR-101c, miR-128-3p, miR-16-1-3p, miR-10a-5p, miR-16-1-3p, miR-124-3p, miR-7857, miR-7b-5p, miR-10b, novel_27, miR-10b-5p, miR-6128, miR-2285x, miR-4510, miR-421-5p, miR-592, novel_82, miR-382-3p, miR-101-3p, miR-203-3p, miR-669, miR-10a, miR-6130, miR-365a-3p, miR-10a-5p, miR-545-3p, miR-505-3p, let-7g-3p, miR-137-3p, miR-216a-3p, miR-503-3p</p> <p>miR-664-3p, novel_51, miR-16b, miR-122-3p, miR-21-3p, miR-424-5p, miR-382-3p, miR-487a, miR-30a-3p, miR-23a-3p, miR-148b-5p, miR-542-3p, miR-16b, miR-33b-3p, miR-497-5p, miR-128-3p, miR-122-3p, miR-3600, miR-30d-3p, miR-23b-3p, miR-322-5p, miR-15a-5p, miR-23c, miR-15a, miR-30e-3p, miR-30a-3p, miR-16a, miR-664a-5p, miR-424-5p, miR-203b-5p, miR-154-3p, miR-16-5p, miR-23b, miR-216a-3p, miR-154b-3p, miR-195a-5p, miR-1248, miR-664b, miR-487a-3p, miR-154a-3p, miR-126b-5p, miR-677, miR-15b-5p</p> <p>miR-20a, miR-329a-5p, miR-106a-5p, miR-3187-3p, miR-490-3p, miR-105-5p, miR-106b-5p, miR-17-5p, miR-106a-5p, miR-210-5p, miR-34b-5p, novel_127, miR-106a, miR-1185-5p, miR-18a-3p, miR-106a, novel_4, miR-545-5p, miR-148b-5p, miR-20b, miR-432-5p, miR-134-3p, novel_23, miR-432, miR-2113, miR-1843b-5p, miR-34a-5p, miR-2426, miR-1193, miR-449a, miR-2284w, miR-93, miR-331-3p, miR-34c, miR-370-5p, miR-20a-5p, miR-22-5p, miR-6123, miR-628-3p, miR-3958-3p, miR-370-5p, miR-329-5p, miR-34c-5p, miR-378g, miR-300-3p, miR-374c-3p, miR-34b, miR-3970, miR-93-5p, miR-18a-3p, miR-17-5p, miR-20b-5p, miR-186-5p, miR-1983, miR-10b-3p, miR-412-3p</p> |
| VTI1B | ENSOARGO(vesicle  |                                                                                                                                                                                                                                                                                                                                                                                                                                                                                                                                                                                                                                                                                                                                                                                                                                                                                                                                                                                                                                                                                                                                                                                                                                                                                                                                                                                                                                                                                                                                                                                                                                                                                             |
| RDH11 | ENSOARGO(retinol  |                                                                                                                                                                                                                                                                                                                                                                                                                                                                                                                                                                                                                                                                                                                                                                                                                                                                                                                                                                                                                                                                                                                                                                                                                                                                                                                                                                                                                                                                                                                                                                                                                                                                                             |

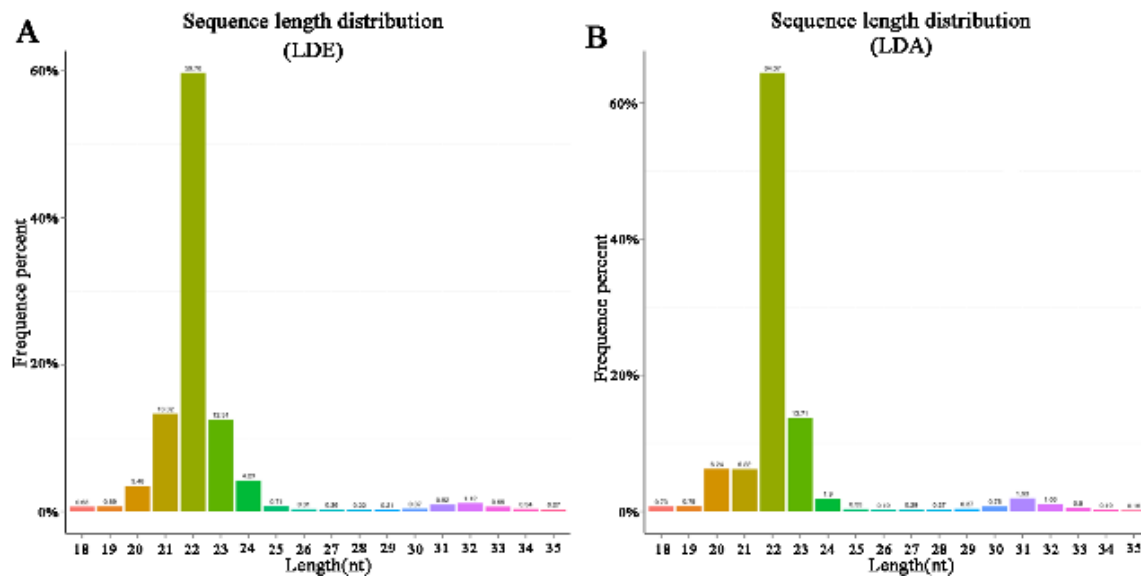

426  
427  
428  
429  
430  
431

**Supplementary Figure S1.** Sequence Length distribution. Fig S1A. Sequence length distribution of prenatal stage (LDE). Fig S1B. Sequence length distribution of postnatal stage (LDA). The X-axis is the length of reads, and the Y-axis is the proportion of the reads at that length.

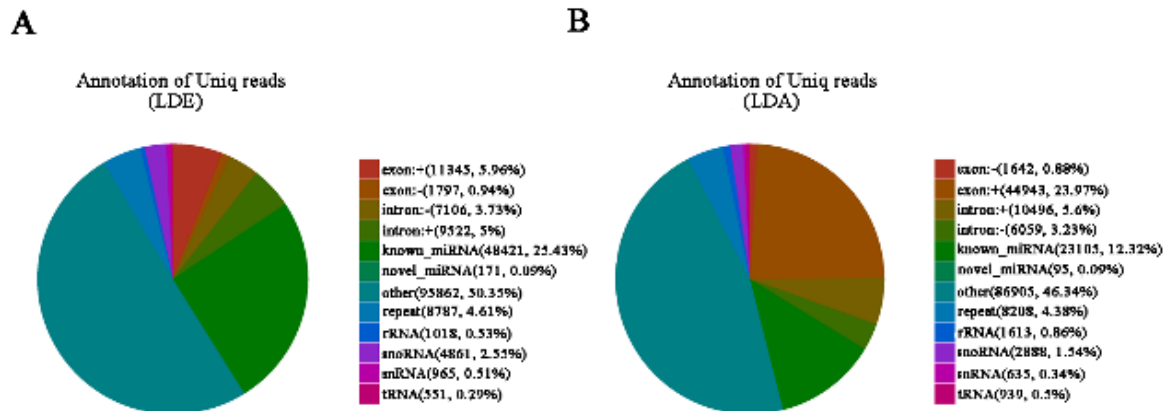

432

433

434 **Supplementary Figure S2.** Annotation of unique reads in LDE and LDA. The number in brackets is the total

435 number of sRNAs aligned with the reference sequence and the percentage is the proportion of each sRNA.

436

437

438
